# Supplementary material for: No phenotypic or genotypic evidence for a link between sleep duration and brain atrophy
Source: PubMed Central journal article supplement (PMC10663160; doi:10.1038/s41562-023-01707-5), 2023-10-05
Supplement: 41562_2023_1707_MOESM2_ESM.pdf [file 41562_2023_1707_MOESM2_ESM.pdf]

## Reporting Summary

Nature Portfolio wishes to improve the reproducibility of the work that we publish. This form provides structure for consistency and transparency in reporting. For further information on Nature Portfolio policies, see our [Editorial Policies](#) and the [Editorial Policy Checklist](#).

### Statistics

For all statistical analyses, confirm that the following items are present in the figure legend, table legend, main text, or Methods section.

n/a Confirmed

- The exact sample size ( $n$ ) for each experimental group/condition, given as a discrete number and unit of measurement
- A statement on whether measurements were taken from distinct samples or whether the same sample was measured repeatedly
- The statistical test(s) used AND whether they are one- or two-sided  
*Only common tests should be described solely by name; describe more complex techniques in the Methods section.*
- A description of all covariates tested
- A description of any assumptions or corrections, such as tests of normality and adjustment for multiple comparisons
- A full description of the statistical parameters including central tendency (e.g. means) or other basic estimates (e.g. regression coefficient) AND variation (e.g. standard deviation) or associated estimates of uncertainty (e.g. confidence intervals)
- For null hypothesis testing, the test statistic (e.g.  $F$ ,  $t$ ,  $r$ ) with confidence intervals, effect sizes, degrees of freedom and  $P$  value noted  
*Give  $P$  values as exact values whenever suitable.*
- For Bayesian analysis, information on the choice of priors and Markov chain Monte Carlo settings
- For hierarchical and complex designs, identification of the appropriate level for tests and full reporting of outcomes
- Estimates of effect sizes (e.g. Cohen's  $d$ , Pearson's  $r$ ), indicating how they were calculated

*Our web collection on [statistics for biologists](#) contains articles on many of the points above.*

### Software and code

Policy information about [availability of computer code](#)

Data collection

Data analysis

For manuscripts utilizing custom algorithms or software that are central to the research but not yet described in published literature, software must be made available to editors and reviewers. We strongly encourage code deposition in a community repository (e.g. GitHub). See the Nature Portfolio [guidelines for submitting code & software](#) for further information.

### Data

Policy information about [availability of data](#)

All manuscripts must include a [data availability statement](#). This statement should provide the following information, where applicable:

- Accession codes, unique identifiers, or web links for publicly available datasets
- A description of any restrictions on data availability
- For clinical datasets or third party data, please ensure that the statement adheres to our [policy](#)

Data supporting the results of the current study are available by requests to the PIs of each sub-study, given appropriate ethics and data protection approvals. Specific limitations on data access applies to some samples. Contact information can be obtained from the corresponding authors. UK Biobank data requests can be submitted to <http://www.ukbiobank.ac.uk>.

## Research involving human participants, their data, or biological material

Policy information about studies with [human participants or human data](#). See also policy information about [sex, gender \(identity/presentation\), and sexual orientation](#) and [race, ethnicity and racism](#).

|                                                                    |                                                                                                                                                                                                                                                                                                                                                                                                                                                                                                        |
|--------------------------------------------------------------------|--------------------------------------------------------------------------------------------------------------------------------------------------------------------------------------------------------------------------------------------------------------------------------------------------------------------------------------------------------------------------------------------------------------------------------------------------------------------------------------------------------|
| Reporting on sex and gender                                        | Sex was included as covariate in the analyses. In addition, post hoc analyses were run split by sex to assess whether specific relationships were seen for males or females, and a formal sex-interaction analysis was further run directly to test effects of sex.                                                                                                                                                                                                                                    |
| Reporting on race, ethnicity, or other socially relevant groupings | For the genetic analyses, participants who were not self-reported white-British were excluded. In addition, the top 10 genetic principal components were included as covariates to control for population structure. The main statistical analyses were repeated controlling for socioeconomic status, based on self-reported income and education. No other social, race or ethnicity variables were used.                                                                                            |
| Population characteristics                                         | Community-dwelling participants from multiple countries in Europe and the US. Some were convenience samples, whereas others were contacted based on population registries. In total, data from 47,039 participants (20.0-89.4 years) with information about sleep duration and MRI of the brain were included. For 3,910, two or more MRI examinations were available, yielding a total of 51,320 MRIs (mean follow-up interval 2.5 years, range 0.005-11.2, 26,811 female/ 24,509 male observations). |
| Recruitment                                                        | <b>Sample</b><br>Community-dwelling participants were recruited from multiple countries in Europe and the US. Some were convenience samples, whereas others were contacted based on population registries. No MRI sample is fully representative of the populations from which they are drawn. Which effects this may have on the results are unknown. For all reported results, relevant population characteristics such as age, sex, education, income, BMI and depression symptoms were covaried.   |
| Ethics oversight                                                   | All procedures were approved by a relevant ethics review board. For Lifebrain, approval was given by the Regional Ethical Committee for South Norway, and all sub-studies were approved by the relevant national review boards. For UKB, ethics approval was obtained from the National Health Service National Research Ethics Service (Ref 11/NW/0382).                                                                                                                                              |

Note that full information on the approval of the study protocol must also be provided in the manuscript.

## Field-specific reporting

Please select the one below that is the best fit for your research. If you are not sure, read the appropriate sections before making your selection.

Life sciences  Behavioural & social sciences  Ecological, evolutionary & environmental sciences

For a reference copy of the document with all sections, see [nature.com/documents/nr-reporting-summary-flat.pdf](https://nature.com/documents/nr-reporting-summary-flat.pdf)

## Life sciences study design

All studies must disclose on these points even when the disclosure is negative.

|                 |                                                                                                                                                                                                                                                                                                                                                                                                                                                                                                                                                                                                                                                                                                                                                              |
|-----------------|--------------------------------------------------------------------------------------------------------------------------------------------------------------------------------------------------------------------------------------------------------------------------------------------------------------------------------------------------------------------------------------------------------------------------------------------------------------------------------------------------------------------------------------------------------------------------------------------------------------------------------------------------------------------------------------------------------------------------------------------------------------|
| Sample size     | We used all available data points to maximize sample size, so this was not defined before the study. Sample size much larger than any existing study, yielding excellent statistical power.                                                                                                                                                                                                                                                                                                                                                                                                                                                                                                                                                                  |
| Data exclusions | Exclusion criteria were predefined, and a detailed description is provided in the manuscript/ SI. Volumetric outliers were defined by having a residual more than four times the magnitude of the residuals standard error in an analysis of age effects and removed from the analyses. Each individual study feeding data into this work used different exclusion criteria before data were entered into the present study, detailed in the manuscript. For genetic analyses, we excluded participants who are not self-reported white-British (n=92.900), have relatives in the biobank (n=148.689), had been labeled as outliers in missingness or heterozygosity (n=968) or had conflicting self-reported vs genetic sex (n=378) by the UK Biobank team. |
| Replication     | We did not have an independent replication sample. Running analyses on the full ample yielded maximal statistical power to detect minute effects. As we did not find evidence for a relationship between sleep duration and brain change in our very big sample, replication was deemed unnecessary. Instead, permutation tests were used to assess stability. Results were evaluated based on effect sizes, p-values and confidence intervals. Proper statistical corrections for multiple comparisons were applied.                                                                                                                                                                                                                                        |
| Randomization   | This is an observational study, hence randomization is not relevant.                                                                                                                                                                                                                                                                                                                                                                                                                                                                                                                                                                                                                                                                                         |
| Blinding        | This is an observational study, hence blinding is not relevant.                                                                                                                                                                                                                                                                                                                                                                                                                                                                                                                                                                                                                                                                                              |

## Reporting for specific materials, systems and methods

We require information from authors about some types of materials, experimental systems and methods used in many studies. Here, indicate whether each material, system or method listed is relevant to your study. If you are not sure if a list item applies to your research, read the appropriate section before selecting a response.

## Materials &amp; experimental systems

- n/a  Involved in the study
- Antibodies
- Eukaryotic cell lines
- Palaeontology and archaeology
- Animals and other organisms
- Clinical data
- Dual use research of concern
- Plants

## Methods

- n/a  Involved in the study
- ChIP-seq
- Flow cytometry
- MRI-based neuroimaging

## Magnetic resonance imaging

## Experimental design

- Design type
- Design specifications
- Behavioral performance measures

## Acquisition

- Imaging type(s)
- Field strength
- Sequence & imaging parameters
- Area of acquisition
- Diffusion MRI  Used  Not used

## Preprocessing

- Preprocessing software
- Normalization
- Normalization template
- Noise and artifact removal
- Volume censoring

## Statistical modeling & inference

|                                           |                                                                                                                                                       |
|-------------------------------------------|-------------------------------------------------------------------------------------------------------------------------------------------------------|
| Model type and settings                   | Generalized additive mixed models; Spatio-temporal linear mixed models                                                                                |
| Effect(s) tested                          | No tasks or stimulus conditions were used (structural only)                                                                                           |
| Specify type of analysis:                 | <input type="checkbox"/> Whole brain <input type="checkbox"/> ROI-based <input checked="" type="checkbox"/> Both                                      |
| Anatomical location(s)                    | Vertex-wise, subcortical ROIs from FreeSurfer, Desikan-Killiany cortical parcellations                                                                |
| Statistic type for inference              | Vertex-wise spatio-temporal linear mixed-effects models.                                                                                              |
| (See <a href="#">Eklund et al. 2016</a> ) |                                                                                                                                                       |
| Correction                                | Z Monte Carlo simulations with a cluster forming threshold of $p < .01$ and a cluster threshold of .05 for vertex-wise analyses; FDR for ROI analyses |

## Models & analysis

|                                     |                                                                       |
|-------------------------------------|-----------------------------------------------------------------------|
| n/a                                 | Involvement in the study                                              |
| <input checked="" type="checkbox"/> | <input type="checkbox"/> Functional and/or effective connectivity     |
| <input checked="" type="checkbox"/> | <input type="checkbox"/> Graph analysis                               |
| <input checked="" type="checkbox"/> | <input type="checkbox"/> Multivariate modeling or predictive analysis |
