# Supplementary material for: No phenotypic or genotypic evidence for a link between sleep duration and brain atrophy
Source: Springer Nature journal article supplement (doi:10.1038/s41562-023-01707-5), 2023-10-05
Supplement: MOESM1 [file 41562_2023_1707_MOESM1_ESM.pdf]

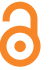

---

# No phenotypic or genotypic evidence for a link between sleep duration and brain atrophy

---

In the format provided by the authors and unedited

---

| SI filename                             | Description                                                                                                                                                                              |
|-----------------------------------------|------------------------------------------------------------------------------------------------------------------------------------------------------------------------------------------|
| <i>Extended background information</i>  |                                                                                                                                                                                          |
| Reviewed studies                        | Reference, sample description and main results of 19 studies testing sleep duration – brain morphometric relationships in adults                                                         |
| MRI methods                             | Overview of scanners and sequence parameters for each sample, description of MRI processing                                                                                              |
| Sample characteristics                  | Description of recruitment, inclusion/exclusion criteria and cognitive testing in each sample                                                                                            |
| <i>Statistical analyses and results</i> |                                                                                                                                                                                          |
| Cortical Longitudinal                   | R-code and results for each of 32 cortical regions<br>-thickness, area, volume (longitudinal)<br>-stratified by sex<br>-full range of sleep duration vs. 5-9 hours                       |
| Subcortical Longitudinal                | R-code and results for each of 19 regions<br>-volume (longitudinal)<br>-full range of sleep duration vs. 5-9 hours<br>-effects of covariates: SES, BMI, depression, global sleep quality |
| Cortical cross-sectional                | R-code and results for each of 32 cortical regions<br>-thickness, area, volume (cross-sectional)<br>-cortical clustering procedures & results for each metric                            |
| Subcortical cross-sectional             | R-code and results for each of 19 regions<br>-volume (cross-sectional)<br>-raw volumes vs. controlling for ICV<br>-effects of covariates: SES, BMI, depression, global sleep quality     |
| Meta-analysis                           | R-code and results for the meta-analysis<br>-subcortical volume and cortical thickness (cross-sectional)<br>-raw volumes vs. controlling for ICV                                         |
| Cortical vertex analyses                | Vertex wise results<br>-cortical thickness<br>-stratified by age (20-60 vs > 60 years)<br>-combined cross-sectional & longitudinal (spatiotemporal linear mixed-effect models)           |
| Mega vs. meta-analytic approach         | -compare results from mega- vs meta-analysis                                                                                                                                             |

|                                     |                                                                                                        |
|-------------------------------------|--------------------------------------------------------------------------------------------------------|
| <i>Genetic analyses and results</i> |                                                                                                        |
| Genetic analyses                    | -GWAS procedures & results<br>-Calculation of PGSs<br>-Mendelian randomization procedures & results    |
| Genetics notes                      | -Detailed Mendelian randomization results<br>-Comparisons of different Mendelian randomization methods |
| Genetics tables                     | -Detailed SNP-level results                                                                            |
| STROBE-MR-checklist                 | - Checklist of recommended items to address in reports of Mendelian randomization studies              |
| Instrumental variables              | Tables of the instrumental variables for the MR analysis (ICV → sleep duration)                        |

**Supplementary Table 3** Overview of Supplemental Information adding background and details to the main manuscript, including R-code.

| Study                           | N     | Sample                   | Main result and method                                                                                                                                            |
|---------------------------------|-------|--------------------------|-------------------------------------------------------------------------------------------------------------------------------------------------------------------|
| <b>Cross-sectional</b>          |       |                          |                                                                                                                                                                   |
| Alperin et al., 2019            | 69    | Older                    | Duration correlated negatively with hippocampal and cortical volume and thickness reductions. ROI, FreeSurfer.                                                    |
| Branger et al., 2016            | 51    | Older                    | No relationship between sleep duration and GM volume. VBM, SPM                                                                                                    |
| Grau-Rivera et al., 2020        | 366   | Middle-aged/ older       | Insomnia symptoms associated with lower GM volume, not surviving corrections. VBM, SPM.                                                                           |
| Kim et al., 2021                | 1353  | Middle-aged/ older       | No relationship in absence of sleep apnea. ROI, custom.                                                                                                           |
| Lim et al., 2016                | 141   | Older                    | No relationship to volume in any of 68 cortical regions. ROI, FreeSurfer.                                                                                         |
| Stoffers et al. 2012            | 65    | Young/ middle-aged       | Early morning awakenings negatively related to orbitofrontal volumes measured, not for initiating or maintain sleep. VBM, SPM.                                    |
| Zitser et al., 2020             | 613   | Middle-aged/ older       | No relationship between global GM volume and sleep duration over several years. VBM, FSL.                                                                         |
| Fjell et al., 2019              | 3105  | Adult lifespan           | No relationship between duration and hippocampal volume. ROI, FreeSurfer.                                                                                         |
| Fjell et al., 2019              | 21000 | Middle-aged/ older (UKB) | ≤ 5 hours and ≥ 9 hours related to smaller hippocampal volume. ROI, FreeSurfer.                                                                                   |
| Aribisala et al., 2020          | 457   | Older (LBC)              | Nighttime sleep duration not associated with total brain volume. ROI, custom.                                                                                     |
| Sabeti et al. 2018              | 79    | Older (90+)              | No relationship between sleep duration and hippocampal volume. ROI, custom.                                                                                       |
| Westwood et al., 2017           | 2457  | Older (incl dementia)    | Long sleep (> 9 hours) negatively associated with total cerebral brain volume. ROI, custom.                                                                       |
| De Looze et al., 2022           | 417   | Older                    | ≥ sleep associated with smaller hippocampal subfields                                                                                                             |
| Li et al., 2022                 | 39692 | Middle-aged/ older (UKB) | Inverse U-shaped relationship (global thickness, volume, area and subcortical structures)                                                                         |
| <b>Longitudinal</b>             |       |                          |                                                                                                                                                                   |
| Sexton et al. 2014 <sup>x</sup> | 147   | Adult lifespan           | No relationship between duration and volume reduction. Vertex-wise, ROI, FreeSurfer.                                                                              |
| Lo et al., 2014                 | 119   | Older                    | No relationship between duration and change in total cerebral, inferior or superior frontal volume, pos relationship with ventricular expansion. ROI, FreeSurfer. |
| Spira et al., 2016              | 122   | Older                    | Sleep < 7 hours and > 7 hours associated with frontotemporal loss. Vertex-wise, FreeSurfer.                                                                       |
| Fjell et al., 2019              | 1299  | Adult lifespan           | No relationship with hippocampal volume loss. ROI, FreeSurfer.                                                                                                    |
| Fjell et al., 2020 <sup>y</sup> | 2205  | Adult lifespan           | No relationship with thickness change. Vertex-wise, FreeSurfer.                                                                                                   |

**Supplemental Table 1 Reviewed studies of sleep duration – brain structure**

X: This sample is a subsample of Fjell et al. 2019. Y: This is a longitudinal subsample of the Fjell et al. 2019 study above UKB: UK Biobank imaging study. LBC: Lothian Birth Cohort study. VBM: Voxel-based morphometry. ROI: Regions of interest. SPM: Statistical parametric mapping. TBV: Total Brain Volume. TGMV: Total Gray Matter Volume. Fjell et al. 2019 is cited twice for the cross-sectional

results, since the study reports analyses from two independent samples. The sample in Fjell et al. 2020 is largely overlapping the longitudinal part of Fjell et al. 2019.

## MAGNETIC RESONNANCE IMAGING METHODS

### Specific information on image acquisition in the different samples

T1 weighted structural scans were acquired at Siemens, Philips and GE scanners at the various sites.

| Sample  | Scanner                         | Field strength<br>(Tesla) | Sequence parameters                                                                                                   |
|---------|---------------------------------|---------------------------|-----------------------------------------------------------------------------------------------------------------------|
| BASE-II | Tim Trio<br>Siemens             | 3.0                       | TR: 2500 ms, TE: 4.77 ms, TI: 1100 ms, flip angle: 7°, slice thickness: 1.0 mm, FoV 256×256 mm, 176 slices            |
| Betula  | Discovery<br>GE                 | 3.0                       | TR: 8.19 ms, TE: 3.2 ms, TI: 450 ms, flip angle: 12°, slice thickness: 1 mm, FOV 250×250 mm, 180 slices               |
| Cam-CAN | Tim Trio<br>Siemens             | 3.0                       | TR: 2250 ms, TE: 2.98 ms, TI: 900 ms, flip angle: 9°, slice thickness 1 mm, FOV 256×240 mm, 192 slices                |
| LCBC    | Avanto<br>Siemens               | 1.5                       | TR: 2400 ms, TE: 3.61 ms, TI: 1000 ms, flip angle: 8°, slice thickness: 1.2 mm, FoV: 240×240 m, 160 slices, iPat = 2  |
|         | Avanto<br>Siemens               | 1.5                       | TR: 2400 ms, TE = 3.79 ms, TI = 1000 ms, flip angle = 8, slice thickness: 1.2 mm, FoV: 240 x 240 mm, 160 slices       |
|         | Skyra<br>Siemens                | 3.0                       | TR: 2300 ms, TE: 2.98 ms, TI: 850 ms, flip angle: 8°, slice thickness: 1 mm, FoV: 256×256 mm, 176 slices              |
|         | Prisma<br>Siemens               | 3.0                       | TR: 2400 ms, TE: 2.22 ms, TI: 1000 ms, flip angle: 8°, slice thickness: 0.8 mm, FoV: 240×256 mm, 208 slices, iPat = 2 |
| UB      | Tim Trio<br>Siemens             | 3.0                       | TR: 2300 ms, TE: 2.98, TI: 900 ms, slice thickness 1 mm, flip angle: 9°, FoV 256×256 mm, 240 slices                   |
| WH-II   | Verio<br>Siemens                | 3.0                       | TR: 2530 ms, TE: 1.79/3.65/5.51/7.37 ms, TI: 1380 ms, flip angle: 7°, slice thickness: 1.0 mm, FOV: 256×256 mm        |
| HCP     | Connectome<br>Skyra<br>Siemens* | 3.0                       | TR: 2400 ms, TE: 2.14 ms, TI: 1000 ms, flip angle: 8°, slice thickness: 0.7 mm, FOV: 224 mm, 256 slices, GRAPPA = 2   |
| UKB     | Skyra<br>Siemens                | 3.0                       | TR: 2000 ms, TI: 880 ms, slice thickness: 1 mm, FoV: 208×256 mm, 256 slices, iPAT=2                                   |

### Supplementary Table MR acquisition parameters

TR: Repetition time, TE: Echo time, TI: Inversion time, FoV: Field of View, iPat: in-plane acceleration, GRAPPA: GRAPPA acceleration factor. \*Customized

### **Lifebrain MRI scanning and processing**

MRI data originated from 11 different scanners (table above), and were processed with FreeSurfer (<https://surfer.nmr.mgh.harvard.edu/>) (1-4). To avoid introducing possible site-specific biases, quality control measures were imposed and no manual editing was done. We previously have reported that across-scanner consistencies in estimated hippocampal (5) and cortical (6) volumes for the scanners used in Lifebrain are high.

### **HCP MRI scanning and processing**

Imaging data were collected and processed by the human connectome project (<https://www.humanconnectome.org/study/hcp-young-adult>) as described in (7). Imaging data were collected a customized Siemens 3T “Connectome Skyra” housed at Washington University in St. Louis, using a standard 32-channel Siemens receive head coil and a “body” transmission coil designed by Siemens specifically for the smaller space available using the special gradients of the WU-Minn and MGH-UCLA Connectome scanners. Anatomical T1-weighted magnetization-prepared rapid gradient echo (MPRAGE) images were obtained in the sagittal plane at 0.7mm isotropic resolution, and T2 weighted FLAIR images were acquired at identical resolution in the sagittal plane. Images were processed using a custom combination of tools from FSL and FreeSurfer (8-10).

### **UKB MRI scanning and processing**

Imaging data were collected and processed by the UK Biobank (<https://www.ukbiobank.ac.uk>) as described in (11), using the FreeSurfer 6.0 software package. Imaging data were collected using 3.0 T Siemens Skyra (32-channel head coil). Anatomical T1-weighted magnetization-prepared rapid gradient echo (MPRAGE) images were obtained in the sagittal plane at 1mm isotropic resolution, and T2 weighted FLAIR images were acquired at 1.05x1x1mm resolution in the sagittal plane.

### **References**

1. A. M. Dale, B. Fischl, M. I. Sereno, Cortical surface-based analysis. I. Segmentation and surface reconstruction. *Neuroimage* **9**, 179-194 (1999).
2. B. Fischl *et al.*, Whole brain segmentation: automated labeling of neuroanatomical structures in the human brain. *Neuron* **33**, 341-355 (2002).
3. M. Reuter, N. J. Schmansky, H. D. Rosas, B. Fischl, Within-subject template estimation for unbiased longitudinal image analysis. *Neuroimage* **61**, 1402-1418 (2012).
4. J. Jovicich *et al.*, Brain morphometry reproducibility in multi-center 3T MRI studies: a comparison of cross-sectional and longitudinal segmentations. *Neuroimage* **83**, 472-484 (2013).
5. A. M. Fjell *et al.*, Continuity and Discontinuity in Human Cortical Development and Change From Embryonic Stages to Old Age. *Cereb Cortex* **29**, 3879-3890 (2019).

6. L. Nyberg *et al.*, Individual differences in brain aging: heterogeneity in cortico-hippocampal but not caudate atrophy rates. *Cereb Cortex* 10.1093/cercor/bhac400 (2022).
7. M. F. Glasser *et al.*, The minimal preprocessing pipelines for the Human Connectome Project. *Neuroimage* **80**, 105-124 (2013).
8. B. Fischl, FreeSurfer. *Neuroimage* **62**, 774-781 (2012).
9. M. Jenkinson, P. Bannister, M. Brady, S. Smith, Improved optimization for the robust and accurate linear registration and motion correction of brain images. *Neuroimage* **17**, 825-841 (2002).
10. M. Jenkinson, C. F. Beckmann, T. E. Behrens, M. W. Woolrich, S. M. Smith, Fsl. *Neuroimage* **62**, 782-790 (2012).
11. F. Alfaro-Almagro *et al.*, Image processing and Quality Control for the first 10,000 brain imaging datasets from UK Biobank. *Neuroimage* **166**, 400-424 (2018).



## **SAMPLE DESCRIPTIVES**

### **BASE II**

#### *Population, recruitment, inclusion/exclusion criteria and general description of study*

Participants of the Berlin Aging Study II (BASE II) were community-dwelling older adults recruited from the greater Berlin metropolitan area through advertisements in newspapers and public areas (for cohort characteristics and additional details, see [1, 2]). The baseline sample comprised 2200 participants. Of these, 1600 were older adults aged 61–88 years (mean age 71.5, SD 3.89; 793 female), and 600 were younger adults aged 24–40 years (mean age 31.1, SD 3.38; 247 female). Participants were invited to a medical exam consisting of a 2-day protocol, and two cognitive testing sessions scheduled 1 week apart, and were tested in small groups (e.g. about 6 participants per group) on a comprehensive cognitive battery that covers key cognitive abilities measured by 21 tasks. Each session lasted about 3.5 h. 1828 had valid data to be included in the present analyses.

MR Sample: After completion of the cognitive examination of BASE-II, eligible participants were invited to take part in one MRI session within a time window of 2–4 weeks after cognitive testing, consisting of 341 older adults aged 61–82 years (mean age 70.1, SD = 3.89; 131 female) and 103 younger adults (mean age 31.4, SD = 3.7; 39 female). MR scans and cognitive scores were obtained 2012-2013. A subsample of the MR sample was later re-invited for follow-up. The different elements of the study were approved by the ethics committees of the Max Planck Institute for Human Development, the Charité University ethics committee and by the ethics committees of The German Association for Psychology (DGPs). Participants signed written informed consent and received monetary compensation for their participation in BASE-II and the MRI study. All experiments were performed in accordance with relevant guidelines and regulations.

#### *Inclusion/exclusion criteria/screening*

Inclusion criteria for taking part in this study were age between 20 and 35 or 60 and 80 years, apparently healthy. Exclusion criteria were untreated diabetes and hypertension; prior stroke, head injuries or brain surgery; psychiatric illness; major depression; dementia with a score < 24 on the Mini-Mental State Examination. To that end, none of the participants took medication that might affect memory function or had a history of head injuries, medical (e.g., heart attack), neurological (e.g., epilepsy), or psychiatric disorders (e.g., depression). All participants reported normal or corrected to normal vision, were right-handed, and scored over 27 on the Mini-Mental Status Examination.

**Betula***Population, recruitment and general description of study/ procedures*

In the Betula longitudinal study on aging, memory and dementia, population-based sampling of healthy middle-aged and older adults was used for recruitment. Detailed recruitment procedures are found in [3, 4]. For the current analyses, the MRI subsample of the study is used. Participation in the neuroimaging study was offered to all participants who had remained in the study and completed cognitive testing at the 5th Betula test wave in 2008-2009, and 376 participants from underwent structural and functional MRI in 2009-2010.

*Inclusion/exclusion criteria/ screening*

Exclusion criteria were severe visual or auditory handicaps, intellectual or developmental disabilities, suspected dementia, having a mother tongue other than Swedish, MRI contraindications, neurological disorders, or visual/motor deficits that could interfere with fMRI data collection, MMSE <24, brain or head surgery, and substantial brain anatomical deviations. Eight participants were excluded completely post scanning due to discovered neurological conditions (Schizophrenia, Multiple Sclerosis, Parkinson's Disease, Hydrocephalus, Alcoholism, and dementia), and an additional two participants were excluded due to MMSE scores below 24. In addition, for 29 participants MRI data only was excluded due to anatomical deviations (subdural hematoma, localized loss of brain tissue, subcortical atrophy, and previous brain or head surgery (n=2)), movement artifacts (n=21), or FreeSurfer processing failures (n=3). Three individuals had missing T1 images due to incomplete acquisition. Age at MRI-scanning, reported with a one decimal precision, was used in the analyses. Testing was performed 1-18 months prior to scanning (mean interval: 9 months).

**Cam-Can***Population, recruitment and general description of study/ procedures*

Recruitment was done by invitation letters based on the patient lists of general practitioners within the Cambridge City area. A population-based cohort of 3000 adults aged 18 or above was recruited to Stage 1 of the project, where they completed an interview including health and lifestyle questions, a core cognitive assessment, and a self-completed questionnaire of lifetime experiences and physical activity. Of those interviewed, ~700 participants aged 18-87 (100 per age decile) continued to Stage 2 where they undergo cognitive testing and provide measures of brain structure and function. A subset of ~250 adults returned for longitudinal follow-up data. The study is conducted in compliance with the Helsinki Declaration, and has been approved by the local ethics committee, Cambridgeshire 2

Research Ethics Committee (reference: 10/H0308/50).

*Inclusion/exclusion criteria/ screening*

General exclusion criteria: Term-time residents of colleges and universities, and participants whose Primary Care Physician feel are inappropriate to include. Exclusion criteria for the MRI part of the study: Not cognitively normal (MMSE < 24, memory defect, consent difficulties), communication difficulties (hearing problems [35db at 1000 Hz], insufficient English language, vision difficulties), medical problems by self-report of diagnosis (dementia diagnosis /Alzheimer's Disease, Parkinson's Disease, Motor Neurone disease, Multiple sclerosis, cancer, stroke, encephalitis, meningitis, epilepsy, head injury with serious results [coma, unconscious for >2 hours, skull fracture], recently diagnosed or uncontrolled high blood pressure, possible pregnancy, current psychiatric conditions [bipolar disorder, schizophrenia, psychosis]), mobility problems (restricted mobility which could prevent further participation, inability to walk 10 metres), substance abuse (past or current treatment for drug abuse, current drug usage), MRI/ MEG safety and comfort exclusions.

**LCBC**

*Population, recruitment and general description of study/ procedures*

Cognitively healthy, community dwelling participants across the lifespan were drawn from studies coordinated by the Research Group for Lifespan Changes in Brain and Cognition (LCBC [www.oslobrains.no](http://www.oslobrains.no)), approved by a Norwegian Regional Committee for Medical and Health Research Ethics. Written informed consent was obtained from all adult participants and from parents or other legal guardians for participants below age of majority. The samples were recruited by newspaper and web page adds, and part of the developmental sample was recruited through the population registry study MoBa <https://www.fhi.no/en/studies/moba/>. Most participants, including all children, were recruited for observational studies, while some adults were recruited to enter into cognitive training studies after baseline assessment.

*Inclusion/exclusion criteria/ screening*

Adult participants were screened using a standardized health interview prior to inclusion in the study. Participants with a history of self- or parent-reported neurological or psychiatric conditions, including clinically significant stroke, serious head injury, untreated hypertension, diabetes, and use of psychoactive drugs within the last two years, were excluded. Further, participants reporting worries concerning their cognitive status, including memory function, were excluded. All participants above 40 years scored  $\geq 24$  on the Mini Mental State Examination [5].

**UB***Population, recruitment and general description of study/ procedures, inclusion/ exclusion criteria/ screening*

Cohorts from the University of Barcelona (UB) site were collapsed across a number of substudies described below.

*WAHA cohort [6]:* Recruitment and selection of participants took place between May 2012 and May 2014; the trial ended May 31, 2016. Participants were healthy elderly men and women with normal cognitive and visual function. Inclusion criteria were age between 63 and 79 years, apparently healthy, and equally willing to be in either of the two groups. Exclusion criteria included inability to undergo neuropsychological testing; morbid obesity (BMI  $\geq 40$  kg/m<sup>2</sup>); uncontrolled diabetes (HbA1c > 8%); uncontrolled hypertension (on-treatment blood pressure  $\geq 150/100$  mmHg); prior stroke, significant head trauma or brain surgery; relevant psychiatric illness; major depression; cognitive deterioration or dementia with a score < 24 on the Mini-Mental State Examination; other neurodegenerative disorders like Parkinson's disease; advanced AMD or eye-related conditions precluding ophthalmological evaluation; prior chemotherapy; chronic illness with projected shortened lifespan; allergy to walnuts; customary use of fish oil and/or tree nuts (> 2 servings/week) and/or other relevant sources of ALA, such as flaxseed oil or soy lecithin. Eligible participants were recruited via mailing study brochures (LLU) or through the non-profit organization Institute of Aging (BCN), advertisements in the study centers, and word of mouth. Interested individuals attended an informational group meeting, completed a short medical questionnaire and signed the informed consent. Next candidates had a face-to-face interview with the study clinician, who assessed potential compliance, reviewed the medical history, inclusion and exclusion criteria, and recent blood work and use of medications or supplements, and administered the MMSE. Eligible participants were scheduled to have baseline tests (neuropsychological and ophthalmologic evaluations and collection of fasting blood and urine) and were then randomized to either the control or walnut group using a computerized random number table with stratification by center, sex, and age range. Couples entering the study were treated as one number and were randomized into the same group.

*CR and iTBS cohorts [7]:* Healthy volunteers older than 60 were recruited via the Institute of Aging, Barcelona. Individuals willing to participate were gathered in an informal meeting to tell them about the investigation, which included repetitive transcranial magnetic stimulation (TMS). Eligible participants had a normal cognitive profile with MMSE scores  $\geq 24$  and performances not below 1.5

SD according to normative scores (adjusted for age and education (Peña-Casanova et al., 2009)) on a neuropsychological evaluation.

*GABA cohort [8]:* Participants were recruited from the Institute of Aging (Barcelona) and the University of Experience, an initiative by the University of Barcelona for students aged 55 and older, offering special one and two-year degrees. Older adults, aged  $\geq 60$  years (age (mean  $\pm$  SD),  $68.15 \pm 4.6$  years; age range: 60–79 years), naive to stimulation, participated in this study after giving informed consent, in accordance with the Declaration of Helsinki (1964, last revision 2013). None of the participants reported a diagnosis of a neurological or psychiatric disorder or any TMS contraindication. Inclusion criteria for the older subjects included a normal cognitive profile with mini-mental state examination (MMSE) scores of  $\geq 24$  and performance scores not more than 1.5 standard deviation (SD) below normative data (adjusted for age and years of education) on any of the administered neuropsychological tests (i.e., they did not fulfil the criteria for mild cognitive impairment (MCI). The neuropsychological battery included (1) a screening test for dementia, using the MMSE, and an evaluation of: (2) premorbid cognition and intelligence quotient (IQ), using the vocabulary subtest of the Wechsler Adult Intelligence Scale-III (WAIS-III) and National Adult Reading Test (NART); (3) verbal memory, using the Free and Cued Selective Reminding Test (SRT); (4) executive functions, using the phonemic fluency task and Trail Making Test B (TMTB); (5) language, using the semantic fluency task and Boston Naming Test (BNT); and (6) speed of processing, using the Symbol Digit Modalities Test (SDMT).

*PD and MSA cohorts [9]:* Healthy volunteers were recruited from the Aging Institute in Barcelona. Inclusion criteria were: scores within normality in a battery of neuropsychological tests described below (adjusted for age and education), IQ within normality as measured by the Vocabulary subtest (WAIS, scalar score  $>7$ ). Exclusion criteria included: diagnosis of any neurological or psychiatric disease, mild cognitive impairment (MCI), any other condition that might affect cognition (chemotherapy or radiotherapy), diagnosis of fibromyalgia and any incompatibility to undergo MRI. Visuospatial and visuooperceptual functions were assessed with Benton Visual Form Discrimination (VFD) and Judgment of Line Orientation (JLO) tests; executive functions were evaluated with phonemic (words beginning with the letter “p” in 1 minute) and semantic (animals in 1 minute) fluencies; memory through total learning recall (sum of correct responses from trial I to trial V) and delayed recall (total recall after 20 min) through scores on Rey’s Auditory Verbal Learning Test (RAVLT). Attention and WM were assessed with Digit Span Forward and Backward, the Stroop Color-Word Test, Symbol Digits Modalities Tests (SDMT) and the Trail Making Test (in seconds), part A (TMTA) and part B (TMTB); and language was

assessed by the total number of correct responses in the short version of the Boston Naming Test (BNT).

## **Whitehall**

### *Population, recruitment and general description of study/ procedures*

The Whitehall II study, starting in 1985, includes 10,308 British civil servants followed over time, which allows exploring factors hypothesized to affect brain health and cognitive aging. At study start, phase 1 (1985-1988), the population representative cohort was in the age range 35-55 years. MRI was done in Phase 11 (2012-2013) of this study, at which time the total number participants was 6035, and the age range was 60-85 years [10]. A random sample willing and able to give informed consent to participate in the imaging sub-study of Whitehall II was included, and it is this sub-cohort of the Whitehall study which is included in the present analyses. Ethical approval was granted generically for the “Protocol for non-invasive magnetic resonance investigations in healthy volunteers” (MSD/IDREC/2010/P17.2) by the University of Oxford Central University/ Medical Science Division Interdisciplinary Research Ethics Committee (CUREC/MSD-IDREC), who also approved the specific protocol: “Predicting MRI abnormalities with longitudinal data of the Whitehall II sub-study” (MSD-IDREC-C1-2011-71).

### *Inclusion/exclusion criteria/ screening*

A random selection of 800 participants from the Whitehall II phase 11 study was done. Exclusion criteria were MRI contraindications, or being unable to travel to Oxford without assistance. After the exclusion of those with excess motion (N=4) and self-reported history of stroke (N=16). No participant was diagnosed with dementia.

## **HCP**

### *Population, recruitment and general description of study/ procedures*

The Human Connectome project (HCP) aimed to study and freely share data from 1200 young adults (ages 22-35) from families with twins and non-twin siblings, using a protocol that includes structural and functional magnetic resonance imaging (MRI, fMRI), diffusion tensor imaging (dMRI) at 3 Tesla (3T) and behavioral and genetic testing. The dataset used was the 1200 Subjects Release ([https://www.humanconnectome.org/storage/app/media/documentation/s1200/HCP\\_S1200\\_Release\\_Reference\\_Manual.pdf](https://www.humanconnectome.org/storage/app/media/documentation/s1200/HCP_S1200_Release_Reference_Manual.pdf)). 243 MZ and DZ twin pairs were identified by genotyping. Age was entered as years without decimals.

*Inclusion/exclusion criteria/ screening*

The participant pool comes from healthy individuals born in Missouri to families that include twins, based on data from the Missouri Department of Health and Senior Services Bureau of Vital Records. Additional recruiting efforts in HCP were used to ensure that participants broadly reflect the ethnic and racial composition of the U.S. population as represented in the 2000 decennial census. 'Healthy' was broadly defined, aiming for a pool that is generally representative of the population at large, to capture a wide range of variability in healthy individuals with respect to behavioral, ethnic, and socioeconomic diversity. Sibships with individuals having severe neurodevelopmental disorders (e.g., autism), documented neuropsychiatric disorders (e.g., schizophrenia or depression) or neurologic disorders (e.g., Parkinson's disease) were excluded. Individuals with illnesses such as diabetes or high blood pressure were additionally excluded, as were non-twins (current sample) born prior to 37 weeks gestation. Individuals who were smokers, overweight, or had a history of heavy drinking or recreational drug use without having experienced severe symptoms were included. For a full list of inclusion and exclusion criteria, see [11].

**UKB***Population, recruitment and general description of study/ procedures*

UK Biobank (UKB) (<https://www.ukbiobank.ac.uk/about-biobank-uk/>) is a major national and international health resource with the aim of improving the prevention, diagnosis and treatment of a wide range of illnesses. UK Biobank recruited ≈500,000 people aged between 40-69 years in 2006-2010 from across the country to take part in this project [12]. Potential participants were identified through National Health Service (NHS) registers according to being aged 40-69 and living within a reasonable travelling distance of an assessment centre. Assessment centres (22 in total) are located in accessible and convenient locations with a large surrounding population. Participants have undergone measures and provided samples and detailed information about themselves and agreed to have their health followed. Age was calculated from year and month of birth (day of month is missing, and was set to 1 for all subjects) to date of assessment. Age was calculated at the 0\_0 timepoint for participants without MRI, and 2\_0 timepoint for participants with MRI.

## References

1. Bertram, L., et al., *Cohort profile: The Berlin Aging Study II (BASE-II)*. Int J Epidemiol, 2014. **43**(3): p. 703-12.
2. Gerstorf, D., et al., *Editorial*. Gerontology, 2016. **62**(3): p. 311-5.
3. Nilsson, L.G., et al., *The Betula prospective cohort study: Memory, health, and aging*. Aging, Neuropsychology and Cognition, 1997. **4**: p. 1-32.
4. Nilsson, L.-G., et al., *Betula: A prospective cohort study on memory, health and aging*. Aging, Neuropsychology, and Cognition, 2004. **11**(2-3): p. pp.
5. Folstein, M.F., S.E. Folstein, and P.R. McHugh, "Mini-mental state". A practical method for grading the cognitive state of patients for the clinician. J Psychiatr Res, 1975. **12**(3): p. 189-98.
6. Rajaram, S., et al., *The Walnuts and Healthy Aging Study (WAHA): Protocol for a Nutritional Intervention Trial with Walnuts on Brain Aging*. Front Aging Neurosci, 2016. **8**: p. 333.
7. Vidal-Pineiro, D., et al., *Task-dependent activity and connectivity predict episodic memory network-based responses to brain stimulation in healthy aging*. Brain Stimul, 2014. **7**(2): p. 287-96.
8. Abellana-Perez, K., et al., *Age-related differences in default-mode network connectivity in response to intermittent theta-burst stimulation and its relationships with maintained cognition and brain integrity in healthy aging*. Neuroimage, 2019. **188**: p. 794-806.
9. Uribe, C., et al., *Patterns of cortical thinning in nondemented Parkinson's disease patients*. Mov Disord, 2016. **31**(5): p. 699-708.
10. Filippini, N., et al., *Study protocol: The Whitehall II imaging sub-study*. BMC Psychiatry, 2014. **14**: p. 159.
11. Van Essen, D.C., et al., *The WU-Minn Human Connectome Project: an overview*. Neuroimage, 2013. **80**: p. 62-79.
12. Guggenheim, J.A., C. Williams, and U.B.E.V. Consortium, *Role of Educational Exposure in the Association Between Myopia and Birth Order*. Jama Ophthalmology, 2015. **133**(12): p. 1408-1414.



# Cortical measures longitudinal

## Contents

|                                                                |           |
|----------------------------------------------------------------|-----------|
| <b>Introduction</b>                                            | <b>13</b> |
| Data . . . . .                                                 | 13        |
| Models . . . . .                                               | 13        |
| <b>Results per region and measure</b>                          | <b>13</b> |
| bankssts_area: Stratified by sex . . . . .                     | 13        |
| Female: Full data . . . . .                                    | 13        |
| Male: Full data . . . . .                                      | 14        |
| bankssts_area . . . . .                                        | 15        |
| Full data . . . . .                                            | 15        |
| Restricted to sleep $\geq 5$ and $\leq 9$ hours . . . . .      | 17        |
| bankssts_thickness: Stratified by sex . . . . .                | 18        |
| Female: Full data . . . . .                                    | 18        |
| Male: Full data . . . . .                                      | 19        |
| bankssts_thickness . . . . .                                   | 20        |
| Full data . . . . .                                            | 20        |
| Restricted to sleep $\geq 5$ and $\leq 9$ hours . . . . .      | 22        |
| bankssts_volume: Stratified by sex . . . . .                   | 23        |
| Female: Full data . . . . .                                    | 23        |
| Male: Full data . . . . .                                      | 24        |
| bankssts_volume . . . . .                                      | 25        |
| Full data . . . . .                                            | 25        |
| Restricted to sleep $\geq 5$ and $\leq 9$ hours . . . . .      | 27        |
| caudalanteriorcingulate_area: Stratified by sex . . . . .      | 28        |
| Female: Full data . . . . .                                    | 28        |
| Male: Full data . . . . .                                      | 29        |
| caudalanteriorcingulate_area . . . . .                         | 30        |
| Full data . . . . .                                            | 30        |
| Restricted to sleep $\geq 5$ and $\leq 9$ hours . . . . .      | 32        |
| caudalanteriorcingulate_thickness: Stratified by sex . . . . . | 33        |
| Female: Full data . . . . .                                    | 33        |
| Male: Full data . . . . .                                      | 34        |
| caudalanteriorcingulate_thickness . . . . .                    | 35        |
| Full data . . . . .                                            | 35        |
| Restricted to sleep $\geq 5$ and $\leq 9$ hours . . . . .      | 37        |
| caudalanteriorcingulate_volume: Stratified by sex . . . . .    | 38        |
| Female: Full data . . . . .                                    | 38        |
| Male: Full data . . . . .                                      | 39        |
| caudalanteriorcingulate_volume . . . . .                       | 40        |
| Full data . . . . .                                            | 40        |
| Restricted to sleep $\geq 5$ and $\leq 9$ hours . . . . .      | 42        |
| caudalmiddlefrontal_area: Stratified by sex . . . . .          | 43        |
| Female: Full data . . . . .                                    | 43        |
| Male: Full data . . . . .                                      | 44        |

|                                                            |    |
|------------------------------------------------------------|----|
| caudalmiddlefrontal_area . . . . .                         | 45 |
| Full data . . . . .                                        | 45 |
| Restricted to sleep $\geq 5$ and $\leq 9$ hours . . . . .  | 47 |
| caudalmiddlefrontal_thickness: Stratified by sex . . . . . | 48 |
| Female: Full data . . . . .                                | 48 |
| Male: Full data . . . . .                                  | 49 |
| caudalmiddlefrontal_thickness . . . . .                    | 50 |
| Full data . . . . .                                        | 50 |
| Restricted to sleep $\geq 5$ and $\leq 9$ hours . . . . .  | 52 |
| caudalmiddlefrontal_volume: Stratified by sex . . . . .    | 53 |
| Female: Full data . . . . .                                | 53 |
| Male: Full data . . . . .                                  | 54 |
| caudalmiddlefrontal_volume . . . . .                       | 55 |
| Full data . . . . .                                        | 55 |
| Restricted to sleep $\geq 5$ and $\leq 9$ hours . . . . .  | 57 |
| cuneus_area: Stratified by sex . . . . .                   | 58 |
| Female: Full data . . . . .                                | 58 |
| Male: Full data . . . . .                                  | 59 |
| cuneus_area . . . . .                                      | 60 |
| Full data . . . . .                                        | 60 |
| Restricted to sleep $\geq 5$ and $\leq 9$ hours . . . . .  | 62 |
| cuneus_thickness: Stratified by sex . . . . .              | 63 |
| Female: Full data . . . . .                                | 63 |
| Male: Full data . . . . .                                  | 64 |
| cuneus_thickness . . . . .                                 | 65 |
| Full data . . . . .                                        | 65 |
| Restricted to sleep $\geq 5$ and $\leq 9$ hours . . . . .  | 67 |
| cuneus_volume: Stratified by sex . . . . .                 | 68 |
| Female: Full data . . . . .                                | 68 |
| Male: Full data . . . . .                                  | 69 |
| cuneus_volume . . . . .                                    | 70 |
| Full data . . . . .                                        | 70 |
| Restricted to sleep $\geq 5$ and $\leq 9$ hours . . . . .  | 72 |
| entorhinal_area: Stratified by sex . . . . .               | 73 |
| Female: Full data . . . . .                                | 73 |
| Male: Full data . . . . .                                  | 74 |
| entorhinal_area . . . . .                                  | 75 |
| Full data . . . . .                                        | 75 |
| Restricted to sleep $\geq 5$ and $\leq 9$ hours . . . . .  | 77 |
| entorhinal_thickness: Stratified by sex . . . . .          | 78 |
| Female: Full data . . . . .                                | 78 |
| Male: Full data . . . . .                                  | 79 |
| entorhinal_thickness . . . . .                             | 80 |
| Full data . . . . .                                        | 80 |
| Restricted to sleep $\geq 5$ and $\leq 9$ hours . . . . .  | 82 |
| entorhinal_volume: Stratified by sex . . . . .             | 83 |
| Female: Full data . . . . .                                | 83 |
| Male: Full data . . . . .                                  | 84 |
| entorhinal_volume . . . . .                                | 85 |
| Full data . . . . .                                        | 85 |
| Restricted to sleep $\geq 5$ and $\leq 9$ hours . . . . .  | 87 |
| frontalpole_area: Stratified by sex . . . . .              | 88 |
| Female: Full data . . . . .                                | 88 |
| Male: Full data . . . . .                                  | 89 |

|                                                           |     |
|-----------------------------------------------------------|-----|
| frontalpole_area . . . . .                                | 90  |
| Full data . . . . .                                       | 90  |
| Restricted to sleep $\geq 5$ and $\leq 9$ hours . . . . . | 92  |
| frontalpole_thickness: Stratified by sex . . . . .        | 93  |
| Female: Full data . . . . .                               | 93  |
| Male: Full data . . . . .                                 | 94  |
| frontalpole_thickness . . . . .                           | 95  |
| Full data . . . . .                                       | 95  |
| Restricted to sleep $\geq 5$ and $\leq 9$ hours . . . . . | 97  |
| frontalpole_volume: Stratified by sex . . . . .           | 98  |
| Female: Full data . . . . .                               | 98  |
| Male: Full data . . . . .                                 | 99  |
| frontalpole_volume . . . . .                              | 100 |
| Full data . . . . .                                       | 100 |
| Restricted to sleep $\geq 5$ and $\leq 9$ hours . . . . . | 102 |
| fusiform_area: Stratified by sex . . . . .                | 103 |
| Female: Full data . . . . .                               | 103 |
| Male: Full data . . . . .                                 | 104 |
| fusiform_area . . . . .                                   | 105 |
| Full data . . . . .                                       | 105 |
| Restricted to sleep $\geq 5$ and $\leq 9$ hours . . . . . | 107 |
| fusiform_thickness: Stratified by sex . . . . .           | 108 |
| Female: Full data . . . . .                               | 108 |
| Male: Full data . . . . .                                 | 109 |
| fusiform_thickness . . . . .                              | 110 |
| Full data . . . . .                                       | 110 |
| Restricted to sleep $\geq 5$ and $\leq 9$ hours . . . . . | 112 |
| fusiform_volume: Stratified by sex . . . . .              | 113 |
| Female: Full data . . . . .                               | 113 |
| Male: Full data . . . . .                                 | 114 |
| fusiform_volume . . . . .                                 | 115 |
| Full data . . . . .                                       | 115 |
| Restricted to sleep $\geq 5$ and $\leq 9$ hours . . . . . | 117 |
| inferiorparietal_area: Stratified by sex . . . . .        | 118 |
| Female: Full data . . . . .                               | 118 |
| Male: Full data . . . . .                                 | 119 |
| inferiorparietal_area . . . . .                           | 120 |
| Full data . . . . .                                       | 120 |
| Restricted to sleep $\geq 5$ and $\leq 9$ hours . . . . . | 122 |
| inferiorparietal_thickness: Stratified by sex . . . . .   | 123 |
| Female: Full data . . . . .                               | 123 |
| Male: Full data . . . . .                                 | 124 |
| inferiorparietal_thickness . . . . .                      | 125 |
| Full data . . . . .                                       | 125 |
| Restricted to sleep $\geq 5$ and $\leq 9$ hours . . . . . | 127 |
| inferiorparietal_volume: Stratified by sex . . . . .      | 128 |
| Female: Full data . . . . .                               | 128 |
| Male: Full data . . . . .                                 | 129 |
| inferiorparietal_volume . . . . .                         | 130 |
| Full data . . . . .                                       | 130 |
| Restricted to sleep $\geq 5$ and $\leq 9$ hours . . . . . | 132 |
| inferiortemporal_area: Stratified by sex . . . . .        | 133 |
| Female: Full data . . . . .                               | 133 |
| Male: Full data . . . . .                                 | 134 |

|                                                           |     |
|-----------------------------------------------------------|-----|
| inferiortemporal_area . . . . .                           | 135 |
| Full data . . . . .                                       | 135 |
| Restricted to sleep $\geq 5$ and $\leq 9$ hours . . . . . | 137 |
| inferiortemporal_thickness: Stratified by sex . . . . .   | 138 |
| Female: Full data . . . . .                               | 138 |
| Male: Full data . . . . .                                 | 139 |
| inferiortemporal_thickness . . . . .                      | 140 |
| Full data . . . . .                                       | 140 |
| Restricted to sleep $\geq 5$ and $\leq 9$ hours . . . . . | 142 |
| inferiortemporal_volume: Stratified by sex . . . . .      | 143 |
| Female: Full data . . . . .                               | 143 |
| Male: Full data . . . . .                                 | 144 |
| inferiortemporal_volume . . . . .                         | 145 |
| Full data . . . . .                                       | 145 |
| Restricted to sleep $\geq 5$ and $\leq 9$ hours . . . . . | 147 |
| insula_area: Stratified by sex . . . . .                  | 148 |
| Female: Full data . . . . .                               | 148 |
| Male: Full data . . . . .                                 | 149 |
| insula_area . . . . .                                     | 150 |
| Full data . . . . .                                       | 150 |
| Restricted to sleep $\geq 5$ and $\leq 9$ hours . . . . . | 152 |
| insula_thickness: Stratified by sex . . . . .             | 153 |
| Female: Full data . . . . .                               | 153 |
| Male: Full data . . . . .                                 | 154 |
| insula_thickness . . . . .                                | 155 |
| Full data . . . . .                                       | 155 |
| Restricted to sleep $\geq 5$ and $\leq 9$ hours . . . . . | 157 |
| insula_volume: Stratified by sex . . . . .                | 158 |
| Female: Full data . . . . .                               | 158 |
| Male: Full data . . . . .                                 | 159 |
| insula_volume . . . . .                                   | 160 |
| Full data . . . . .                                       | 160 |
| Restricted to sleep $\geq 5$ and $\leq 9$ hours . . . . . | 162 |
| isthmuscingulate_area: Stratified by sex . . . . .        | 163 |
| Female: Full data . . . . .                               | 163 |
| Male: Full data . . . . .                                 | 164 |
| isthmuscingulate_area . . . . .                           | 165 |
| Full data . . . . .                                       | 165 |
| Restricted to sleep $\geq 5$ and $\leq 9$ hours . . . . . | 167 |
| isthmuscingulate_thickness: Stratified by sex . . . . .   | 168 |
| Female: Full data . . . . .                               | 168 |
| Male: Full data . . . . .                                 | 169 |
| isthmuscingulate_thickness . . . . .                      | 170 |
| Full data . . . . .                                       | 170 |
| Restricted to sleep $\geq 5$ and $\leq 9$ hours . . . . . | 172 |
| isthmuscingulate_volume: Stratified by sex . . . . .      | 173 |
| Female: Full data . . . . .                               | 173 |
| Male: Full data . . . . .                                 | 174 |
| isthmuscingulate_volume . . . . .                         | 175 |
| Full data . . . . .                                       | 175 |
| Restricted to sleep $\geq 5$ and $\leq 9$ hours . . . . . | 177 |
| lateraloccipital_area: Stratified by sex . . . . .        | 178 |
| Female: Full data . . . . .                               | 178 |
| Male: Full data . . . . .                                 | 179 |

|                                                             |     |
|-------------------------------------------------------------|-----|
| lateraloccipital_area . . . . .                             | 180 |
| Full data . . . . .                                         | 180 |
| Restricted to sleep $\geq 5$ and $\leq 9$ hours . . . . .   | 182 |
| lateraloccipital_thickness: Stratified by sex . . . . .     | 183 |
| Female: Full data . . . . .                                 | 183 |
| Male: Full data . . . . .                                   | 184 |
| lateraloccipital_thickness . . . . .                        | 185 |
| Full data . . . . .                                         | 185 |
| Restricted to sleep $\geq 5$ and $\leq 9$ hours . . . . .   | 187 |
| lateraloccipital_volume: Stratified by sex . . . . .        | 188 |
| Female: Full data . . . . .                                 | 188 |
| Male: Full data . . . . .                                   | 189 |
| lateraloccipital_volume . . . . .                           | 190 |
| Full data . . . . .                                         | 190 |
| Restricted to sleep $\geq 5$ and $\leq 9$ hours . . . . .   | 192 |
| lateralorbitofrontal_area: Stratified by sex . . . . .      | 193 |
| Female: Full data . . . . .                                 | 193 |
| Male: Full data . . . . .                                   | 194 |
| lateralorbitofrontal_area . . . . .                         | 195 |
| Full data . . . . .                                         | 195 |
| Restricted to sleep $\geq 5$ and $\leq 9$ hours . . . . .   | 197 |
| lateralorbitofrontal_thickness: Stratified by sex . . . . . | 198 |
| Female: Full data . . . . .                                 | 198 |
| Male: Full data . . . . .                                   | 199 |
| lateralorbitofrontal_thickness . . . . .                    | 200 |
| Full data . . . . .                                         | 200 |
| Restricted to sleep $\geq 5$ and $\leq 9$ hours . . . . .   | 202 |
| lateralorbitofrontal_volume: Stratified by sex . . . . .    | 203 |
| Female: Full data . . . . .                                 | 203 |
| Male: Full data . . . . .                                   | 204 |
| lateralorbitofrontal_volume . . . . .                       | 205 |
| Full data . . . . .                                         | 205 |
| Restricted to sleep $\geq 5$ and $\leq 9$ hours . . . . .   | 207 |
| lingual_area: Stratified by sex . . . . .                   | 208 |
| Female: Full data . . . . .                                 | 208 |
| Male: Full data . . . . .                                   | 209 |
| lingual_area . . . . .                                      | 210 |
| Full data . . . . .                                         | 210 |
| Restricted to sleep $\geq 5$ and $\leq 9$ hours . . . . .   | 212 |
| lingual_thickness: Stratified by sex . . . . .              | 213 |
| Female: Full data . . . . .                                 | 213 |
| Male: Full data . . . . .                                   | 214 |
| lingual_thickness . . . . .                                 | 215 |
| Full data . . . . .                                         | 215 |
| Restricted to sleep $\geq 5$ and $\leq 9$ hours . . . . .   | 217 |
| lingual_volume: Stratified by sex . . . . .                 | 218 |
| Female: Full data . . . . .                                 | 218 |
| Male: Full data . . . . .                                   | 219 |
| lingual_volume . . . . .                                    | 220 |
| Full data . . . . .                                         | 220 |
| Restricted to sleep $\geq 5$ and $\leq 9$ hours . . . . .   | 222 |
| medialorbitofrontal_area: Stratified by sex . . . . .       | 223 |
| Female: Full data . . . . .                                 | 223 |
| Male: Full data . . . . .                                   | 224 |

|                                                  |     |
|--------------------------------------------------|-----|
| medialorbitofrontal_area                         | 225 |
| Full data                                        | 225 |
| Restricted to sleep $\geq 5$ and $\leq 9$ hours  | 227 |
| medialorbitofrontal_thickness: Stratified by sex | 228 |
| Female: Full data                                | 228 |
| Male: Full data                                  | 229 |
| medialorbitofrontal_thickness                    | 230 |
| Full data                                        | 230 |
| Restricted to sleep $\geq 5$ and $\leq 9$ hours  | 232 |
| medialorbitofrontal_volume: Stratified by sex    | 233 |
| Female: Full data                                | 233 |
| Male: Full data                                  | 234 |
| medialorbitofrontal_volume                       | 235 |
| Full data                                        | 235 |
| Restricted to sleep $\geq 5$ and $\leq 9$ hours  | 237 |
| middletemporal_area: Stratified by sex           | 238 |
| Female: Full data                                | 238 |
| Male: Full data                                  | 239 |
| middletemporal_area                              | 240 |
| Full data                                        | 240 |
| Restricted to sleep $\geq 5$ and $\leq 9$ hours  | 242 |
| middletemporal_thickness: Stratified by sex      | 243 |
| Female: Full data                                | 243 |
| Male: Full data                                  | 244 |
| middletemporal_thickness                         | 245 |
| Full data                                        | 245 |
| Restricted to sleep $\geq 5$ and $\leq 9$ hours  | 247 |
| middletemporal_volume: Stratified by sex         | 248 |
| Female: Full data                                | 248 |
| Male: Full data                                  | 249 |
| middletemporal_volume                            | 250 |
| Full data                                        | 250 |
| Restricted to sleep $\geq 5$ and $\leq 9$ hours  | 252 |
| paracentral_area: Stratified by sex              | 253 |
| Female: Full data                                | 253 |
| Male: Full data                                  | 254 |
| paracentral_area                                 | 255 |
| Full data                                        | 255 |
| Restricted to sleep $\geq 5$ and $\leq 9$ hours  | 257 |
| paracentral_thickness: Stratified by sex         | 258 |
| Female: Full data                                | 258 |
| Male: Full data                                  | 259 |
| paracentral_thickness                            | 260 |
| Full data                                        | 260 |
| Restricted to sleep $\geq 5$ and $\leq 9$ hours  | 262 |
| paracentral_volume: Stratified by sex            | 263 |
| Female: Full data                                | 263 |
| Male: Full data                                  | 264 |
| paracentral_volume                               | 265 |
| Full data                                        | 265 |
| Restricted to sleep $\geq 5$ and $\leq 9$ hours  | 267 |
| parahippocampal_area: Stratified by sex          | 268 |
| Female: Full data                                | 268 |
| Male: Full data                                  | 269 |

|                                                           |     |
|-----------------------------------------------------------|-----|
| parahippocampal_area . . . . .                            | 270 |
| Full data . . . . .                                       | 270 |
| Restricted to sleep $\geq 5$ and $\leq 9$ hours . . . . . | 272 |
| parahippocampal_thickness: Stratified by sex . . . . .    | 273 |
| Female: Full data . . . . .                               | 273 |
| Male: Full data . . . . .                                 | 274 |
| parahippocampal_thickness . . . . .                       | 275 |
| Full data . . . . .                                       | 275 |
| Restricted to sleep $\geq 5$ and $\leq 9$ hours . . . . . | 277 |
| parahippocampal_volume: Stratified by sex . . . . .       | 278 |
| Female: Full data . . . . .                               | 278 |
| Male: Full data . . . . .                                 | 279 |
| parahippocampal_volume . . . . .                          | 280 |
| Full data . . . . .                                       | 280 |
| Restricted to sleep $\geq 5$ and $\leq 9$ hours . . . . . | 282 |
| parsopercularis_area: Stratified by sex . . . . .         | 283 |
| Female: Full data . . . . .                               | 283 |
| Male: Full data . . . . .                                 | 284 |
| parsopercularis_area . . . . .                            | 285 |
| Full data . . . . .                                       | 285 |
| Restricted to sleep $\geq 5$ and $\leq 9$ hours . . . . . | 287 |
| parsopercularis_thickness: Stratified by sex . . . . .    | 288 |
| Female: Full data . . . . .                               | 288 |
| Male: Full data . . . . .                                 | 289 |
| parsopercularis_thickness . . . . .                       | 290 |
| Full data . . . . .                                       | 290 |
| Restricted to sleep $\geq 5$ and $\leq 9$ hours . . . . . | 292 |
| parsopercularis_volume: Stratified by sex . . . . .       | 293 |
| Female: Full data . . . . .                               | 293 |
| Male: Full data . . . . .                                 | 294 |
| parsopercularis_volume . . . . .                          | 295 |
| Full data . . . . .                                       | 295 |
| Restricted to sleep $\geq 5$ and $\leq 9$ hours . . . . . | 297 |
| parsorbitalis_area: Stratified by sex . . . . .           | 298 |
| Female: Full data . . . . .                               | 298 |
| Male: Full data . . . . .                                 | 299 |
| parsorbitalis_area . . . . .                              | 300 |
| Full data . . . . .                                       | 300 |
| Restricted to sleep $\geq 5$ and $\leq 9$ hours . . . . . | 302 |
| parsorbitalis_thickness: Stratified by sex . . . . .      | 303 |
| Female: Full data . . . . .                               | 303 |
| Male: Full data . . . . .                                 | 304 |
| parsorbitalis_thickness . . . . .                         | 305 |
| Full data . . . . .                                       | 305 |
| Restricted to sleep $\geq 5$ and $\leq 9$ hours . . . . . | 307 |
| parsorbitalis_volume: Stratified by sex . . . . .         | 308 |
| Female: Full data . . . . .                               | 308 |
| Male: Full data . . . . .                                 | 309 |
| parsorbitalis_volume . . . . .                            | 310 |
| Full data . . . . .                                       | 310 |
| Restricted to sleep $\geq 5$ and $\leq 9$ hours . . . . . | 312 |
| parstriangularis_area: Stratified by sex . . . . .        | 313 |
| Female: Full data . . . . .                               | 313 |
| Male: Full data . . . . .                                 | 314 |

|                                                 |     |
|-------------------------------------------------|-----|
| parstriangularis_area                           | 315 |
| Full data                                       | 315 |
| Restricted to sleep $\geq 5$ and $\leq 9$ hours | 317 |
| parstriangularis_thickness: Stratified by sex   | 318 |
| Female: Full data                               | 318 |
| Male: Full data                                 | 319 |
| parstriangularis_thickness                      | 320 |
| Full data                                       | 320 |
| Restricted to sleep $\geq 5$ and $\leq 9$ hours | 322 |
| parstriangularis_volume: Stratified by sex      | 323 |
| Female: Full data                               | 323 |
| Male: Full data                                 | 324 |
| parstriangularis_volume                         | 325 |
| Full data                                       | 325 |
| Restricted to sleep $\geq 5$ and $\leq 9$ hours | 327 |
| pericalcarine_area: Stratified by sex           | 328 |
| Female: Full data                               | 328 |
| Male: Full data                                 | 329 |
| pericalcarine_area                              | 330 |
| Full data                                       | 330 |
| Restricted to sleep $\geq 5$ and $\leq 9$ hours | 332 |
| pericalcarine_thickness: Stratified by sex      | 333 |
| Female: Full data                               | 333 |
| Male: Full data                                 | 334 |
| pericalcarine_thickness                         | 335 |
| Full data                                       | 335 |
| Restricted to sleep $\geq 5$ and $\leq 9$ hours | 337 |
| pericalcarine_volume: Stratified by sex         | 338 |
| Female: Full data                               | 338 |
| Male: Full data                                 | 339 |
| pericalcarine_volume                            | 340 |
| Full data                                       | 340 |
| Restricted to sleep $\geq 5$ and $\leq 9$ hours | 342 |
| postcentral_area: Stratified by sex             | 343 |
| Female: Full data                               | 343 |
| Male: Full data                                 | 344 |
| postcentral_area                                | 345 |
| Full data                                       | 345 |
| Restricted to sleep $\geq 5$ and $\leq 9$ hours | 347 |
| postcentral_thickness: Stratified by sex        | 348 |
| Female: Full data                               | 348 |
| Male: Full data                                 | 349 |
| postcentral_thickness                           | 350 |
| Full data                                       | 350 |
| Restricted to sleep $\geq 5$ and $\leq 9$ hours | 352 |
| postcentral_volume: Stratified by sex           | 353 |
| Female: Full data                               | 353 |
| Male: Full data                                 | 354 |
| postcentral_volume                              | 355 |
| Full data                                       | 355 |
| Restricted to sleep $\geq 5$ and $\leq 9$ hours | 357 |
| posteriorcingulate_area: Stratified by sex      | 358 |
| Female: Full data                               | 358 |
| Male: Full data                                 | 359 |



|                                                            |     |
|------------------------------------------------------------|-----|
| posteriorcingulate_area . . . . .                          | 360 |
| Full data . . . . .                                        | 360 |
| Restricted to sleep $\geq 5$ and $\leq 9$ hours . . . . .  | 362 |
| posteriorcingulate_thickness: Stratified by sex . . . . .  | 363 |
| Female: Full data . . . . .                                | 363 |
| Male: Full data . . . . .                                  | 364 |
| posteriorcingulate_thickness . . . . .                     | 365 |
| Full data . . . . .                                        | 365 |
| Restricted to sleep $\geq 5$ and $\leq 9$ hours . . . . .  | 367 |
| posteriorcingulate_volume: Stratified by sex . . . . .     | 368 |
| Female: Full data . . . . .                                | 368 |
| Male: Full data . . . . .                                  | 369 |
| posteriorcingulate_volume . . . . .                        | 370 |
| Full data . . . . .                                        | 370 |
| Restricted to sleep $\geq 5$ and $\leq 9$ hours . . . . .  | 372 |
| precentral_area: Stratified by sex . . . . .               | 373 |
| Female: Full data . . . . .                                | 373 |
| Male: Full data . . . . .                                  | 374 |
| precentral_area . . . . .                                  | 375 |
| Full data . . . . .                                        | 375 |
| Restricted to sleep $\geq 5$ and $\leq 9$ hours . . . . .  | 377 |
| precentral_thickness: Stratified by sex . . . . .          | 378 |
| Female: Full data . . . . .                                | 378 |
| Male: Full data . . . . .                                  | 379 |
| precentral_thickness . . . . .                             | 380 |
| Full data . . . . .                                        | 380 |
| Restricted to sleep $\geq 5$ and $\leq 9$ hours . . . . .  | 382 |
| precentral_volume: Stratified by sex . . . . .             | 383 |
| Female: Full data . . . . .                                | 383 |
| Male: Full data . . . . .                                  | 384 |
| precentral_volume . . . . .                                | 385 |
| Full data . . . . .                                        | 385 |
| Restricted to sleep $\geq 5$ and $\leq 9$ hours . . . . .  | 387 |
| precuneus_area: Stratified by sex . . . . .                | 388 |
| Female: Full data . . . . .                                | 388 |
| Male: Full data . . . . .                                  | 389 |
| precuneus_area . . . . .                                   | 390 |
| Full data . . . . .                                        | 390 |
| Restricted to sleep $\geq 5$ and $\leq 9$ hours . . . . .  | 392 |
| precuneus_thickness: Stratified by sex . . . . .           | 393 |
| Female: Full data . . . . .                                | 393 |
| Male: Full data . . . . .                                  | 394 |
| precuneus_thickness . . . . .                              | 395 |
| Full data . . . . .                                        | 395 |
| Restricted to sleep $\geq 5$ and $\leq 9$ hours . . . . .  | 397 |
| precuneus_volume: Stratified by sex . . . . .              | 398 |
| Female: Full data . . . . .                                | 398 |
| Male: Full data . . . . .                                  | 399 |
| precuneus_volume . . . . .                                 | 400 |
| Full data . . . . .                                        | 400 |
| Restricted to sleep $\geq 5$ and $\leq 9$ hours . . . . .  | 402 |
| rostralanteriorcingulate_area: Stratified by sex . . . . . | 403 |
| Female: Full data . . . . .                                | 403 |
| Male: Full data . . . . .                                  | 404 |

|                                                       |     |
|-------------------------------------------------------|-----|
| rostralanteriorcingulate_area                         | 405 |
| Full data                                             | 405 |
| Restricted to sleep $\geq 5$ and $\leq 9$ hours       | 407 |
| rostralanteriorcingulate_thickness: Stratified by sex | 408 |
| Female: Full data                                     | 408 |
| Male: Full data                                       | 409 |
| rostralanteriorcingulate_thickness                    | 410 |
| Full data                                             | 410 |
| Restricted to sleep $\geq 5$ and $\leq 9$ hours       | 412 |
| rostralanteriorcingulate_volume: Stratified by sex    | 413 |
| Female: Full data                                     | 413 |
| Male: Full data                                       | 414 |
| rostralanteriorcingulate_volume                       | 415 |
| Full data                                             | 415 |
| Restricted to sleep $\geq 5$ and $\leq 9$ hours       | 417 |
| rostralmiddlefrontal_area: Stratified by sex          | 418 |
| Female: Full data                                     | 418 |
| Male: Full data                                       | 419 |
| rostralmiddlefrontal_area                             | 420 |
| Full data                                             | 420 |
| Restricted to sleep $\geq 5$ and $\leq 9$ hours       | 422 |
| rostralmiddlefrontal_thickness: Stratified by sex     | 423 |
| Female: Full data                                     | 423 |
| Male: Full data                                       | 424 |
| rostralmiddlefrontal_thickness                        | 425 |
| Full data                                             | 425 |
| Restricted to sleep $\geq 5$ and $\leq 9$ hours       | 427 |
| rostralmiddlefrontal_volume: Stratified by sex        | 428 |
| Female: Full data                                     | 428 |
| Male: Full data                                       | 429 |
| rostralmiddlefrontal_volume                           | 430 |
| Full data                                             | 430 |
| Restricted to sleep $\geq 5$ and $\leq 9$ hours       | 432 |
| superiorfrontal_area: Stratified by sex               | 433 |
| Female: Full data                                     | 433 |
| Male: Full data                                       | 434 |
| superiorfrontal_area                                  | 435 |
| Full data                                             | 435 |
| Restricted to sleep $\geq 5$ and $\leq 9$ hours       | 437 |
| superiorfrontal_thickness: Stratified by sex          | 438 |
| Female: Full data                                     | 438 |
| Male: Full data                                       | 439 |
| superiorfrontal_thickness                             | 440 |
| Full data                                             | 440 |
| Restricted to sleep $\geq 5$ and $\leq 9$ hours       | 442 |
| superiorfrontal_volume: Stratified by sex             | 443 |
| Female: Full data                                     | 443 |
| Male: Full data                                       | 444 |
| superiorfrontal_volume                                | 445 |
| Full data                                             | 445 |
| Restricted to sleep $\geq 5$ and $\leq 9$ hours       | 447 |
| superiorparietal_area: Stratified by sex              | 448 |
| Female: Full data                                     | 448 |
| Male: Full data                                       | 449 |

|                                                           |     |
|-----------------------------------------------------------|-----|
| superiorparietal_area . . . . .                           | 450 |
| Full data . . . . .                                       | 450 |
| Restricted to sleep $\geq 5$ and $\leq 9$ hours . . . . . | 452 |
| superiorparietal_thickness: Stratified by sex . . . . .   | 453 |
| Female: Full data . . . . .                               | 453 |
| Male: Full data . . . . .                                 | 454 |
| superiorparietal_thickness . . . . .                      | 455 |
| Full data . . . . .                                       | 455 |
| Restricted to sleep $\geq 5$ and $\leq 9$ hours . . . . . | 457 |
| superiorparietal_volume: Stratified by sex . . . . .      | 458 |
| Female: Full data . . . . .                               | 458 |
| Male: Full data . . . . .                                 | 459 |
| superiorparietal_volume . . . . .                         | 460 |
| Full data . . . . .                                       | 460 |
| Restricted to sleep $\geq 5$ and $\leq 9$ hours . . . . . | 462 |
| superiortemporal_area: Stratified by sex . . . . .        | 463 |
| Female: Full data . . . . .                               | 463 |
| Male: Full data . . . . .                                 | 464 |
| superiortemporal_area . . . . .                           | 465 |
| Full data . . . . .                                       | 465 |
| Restricted to sleep $\geq 5$ and $\leq 9$ hours . . . . . | 467 |
| superiortemporal_thickness: Stratified by sex . . . . .   | 468 |
| Female: Full data . . . . .                               | 468 |
| Male: Full data . . . . .                                 | 469 |
| superiortemporal_thickness . . . . .                      | 470 |
| Full data . . . . .                                       | 470 |
| Restricted to sleep $\geq 5$ and $\leq 9$ hours . . . . . | 472 |
| superiortemporal_volume: Stratified by sex . . . . .      | 473 |
| Female: Full data . . . . .                               | 473 |
| Male: Full data . . . . .                                 | 474 |
| superiortemporal_volume . . . . .                         | 475 |
| Full data . . . . .                                       | 475 |
| Restricted to sleep $\geq 5$ and $\leq 9$ hours . . . . . | 477 |
| supramarginal_area: Stratified by sex . . . . .           | 478 |
| Female: Full data . . . . .                               | 478 |
| Male: Full data . . . . .                                 | 479 |
| supramarginal_area . . . . .                              | 480 |
| Full data . . . . .                                       | 480 |
| Restricted to sleep $\geq 5$ and $\leq 9$ hours . . . . . | 482 |
| supramarginal_thickness: Stratified by sex . . . . .      | 483 |
| Female: Full data . . . . .                               | 483 |
| Male: Full data . . . . .                                 | 484 |
| supramarginal_thickness . . . . .                         | 485 |
| Full data . . . . .                                       | 485 |
| Restricted to sleep $\geq 5$ and $\leq 9$ hours . . . . . | 487 |
| supramarginal_volume: Stratified by sex . . . . .         | 488 |
| Female: Full data . . . . .                               | 488 |
| Male: Full data . . . . .                                 | 489 |
| supramarginal_volume . . . . .                            | 490 |
| Full data . . . . .                                       | 490 |
| Restricted to sleep $\geq 5$ and $\leq 9$ hours . . . . . | 492 |
| transversetemporal_area: Stratified by sex . . . . .      | 493 |
| Female: Full data . . . . .                               | 493 |
| Male: Full data . . . . .                                 | 494 |

|                                                           |            |
|-----------------------------------------------------------|------------|
| transversetemporal_area . . . . .                         | 495        |
| Full data . . . . .                                       | 495        |
| Restricted to sleep $\geq 5$ and $\leq 9$ hours . . . . . | 497        |
| transversetemporal_thickness: Stratified by sex . . . . . | 498        |
| Female: Full data . . . . .                               | 498        |
| Male: Full data . . . . .                                 | 499        |
| transversetemporal_thickness . . . . .                    | 500        |
| Full data . . . . .                                       | 500        |
| Restricted to sleep $\geq 5$ and $\leq 9$ hours . . . . . | 502        |
| transversetemporal_volume: Stratified by sex . . . . .    | 503        |
| Female: Full data . . . . .                               | 503        |
| Male: Full data . . . . .                                 | 504        |
| transversetemporal_volume . . . . .                       | 505        |
| Full data . . . . .                                       | 505        |
| Restricted to sleep $\geq 5$ and $\leq 9$ hours . . . . . | 507        |
| <b>P-values corrected for multiple testing</b>            | <b>508</b> |
| <b>Models per cluster</b>                                 | <b>518</b> |
| Area cluster 1 . . . . .                                  | 518        |
| All longitudinal data . . . . .                           | 518        |
| Participants sleeping 5-9 hours . . . . .                 | 519        |
| Thickness cluster 1 . . . . .                             | 521        |
| All longitudinal data . . . . .                           | 521        |
| Participants sleeping 5-9 hours . . . . .                 | 522        |
| Volume cluster 1 . . . . .                                | 523        |
| All longitudinal data . . . . .                           | 523        |
| Participants sleeping 5-9 hours . . . . .                 | 524        |
| Area cluster 2 . . . . .                                  | 525        |
| All longitudinal data . . . . .                           | 525        |
| Participants sleeping 5-9 hours . . . . .                 | 526        |
| Thickness cluster 2 . . . . .                             | 528        |
| All longitudinal data . . . . .                           | 528        |
| Participants sleeping 5-9 hours . . . . .                 | 529        |
| Volume cluster 2 . . . . .                                | 530        |
| All longitudinal data . . . . .                           | 530        |
| Participants sleeping 5-9 hours . . . . .                 | 531        |
| Area cluster 3 . . . . .                                  | 532        |
| All longitudinal data . . . . .                           | 532        |
| Participants sleeping 5-9 hours . . . . .                 | 533        |
| Thickness cluster 3 . . . . .                             | 535        |
| All longitudinal data . . . . .                           | 535        |
| Participants sleeping 5-9 hours . . . . .                 | 536        |
| Volume cluster 3 . . . . .                                | 537        |
| All longitudinal data . . . . .                           | 537        |
| Participants sleeping 5-9 hours . . . . .                 | 538        |
| <code>library(tidyverse)</code>                           |            |

## Introduction

### Data

All participants with two or more timepoints were included. A count is shown below.

| study | Participants | Observations |
|-------|--------------|--------------|
| MPIB  | 286          | 572          |
| UB    | 38           | 112          |
| UCAM  | 252          | 504          |
| UiO   | 340          | 1013         |
| UKB   | 2854         | 5708         |
| UmU   | 133          | 266          |

### Models

The following GAMM was fitted (icv was not included when the outcome was thickness)

```
mod <- gamm4(  
  value ~ sex + site + icv + s(bl_age, k = 10, bs = 'cr') +  
    s(bl_age, by = sleep_z, bs = 'cr') +  
    s(bl_age, by = time, k = 5, bs = 'cr') +  
    s(sleep_z, by = time, k = 5, bs = 'cr', pc = 0),  
  random = ~(1|id), data = long_dat, REML = FALSE  
)
```

See the document on subcortical longitudinal analyses for an explanation of the model terms.

## Results per region and measure

### bankssts\_area: Stratified by sex

**Female: Full data** Below is the row for `s(sleep_z):time` from the model output.

```
## s(sleep_z):time  1.000  1.000  2.367  0.124
```

Below are plots of a plot of `s(bl_age)`, `s(bl_age):sleep_z`, `s(bl_age):time`, and `s(sleep_z):time`. For `s(sleep_z):time`, roughly, if we cannot fit a straight line through the confidence bands, there is evidence that the effect of time depends on sleep duration. It is correct that the confidence interval is zero at one point along the axis; this happens because we do not include the main effect.

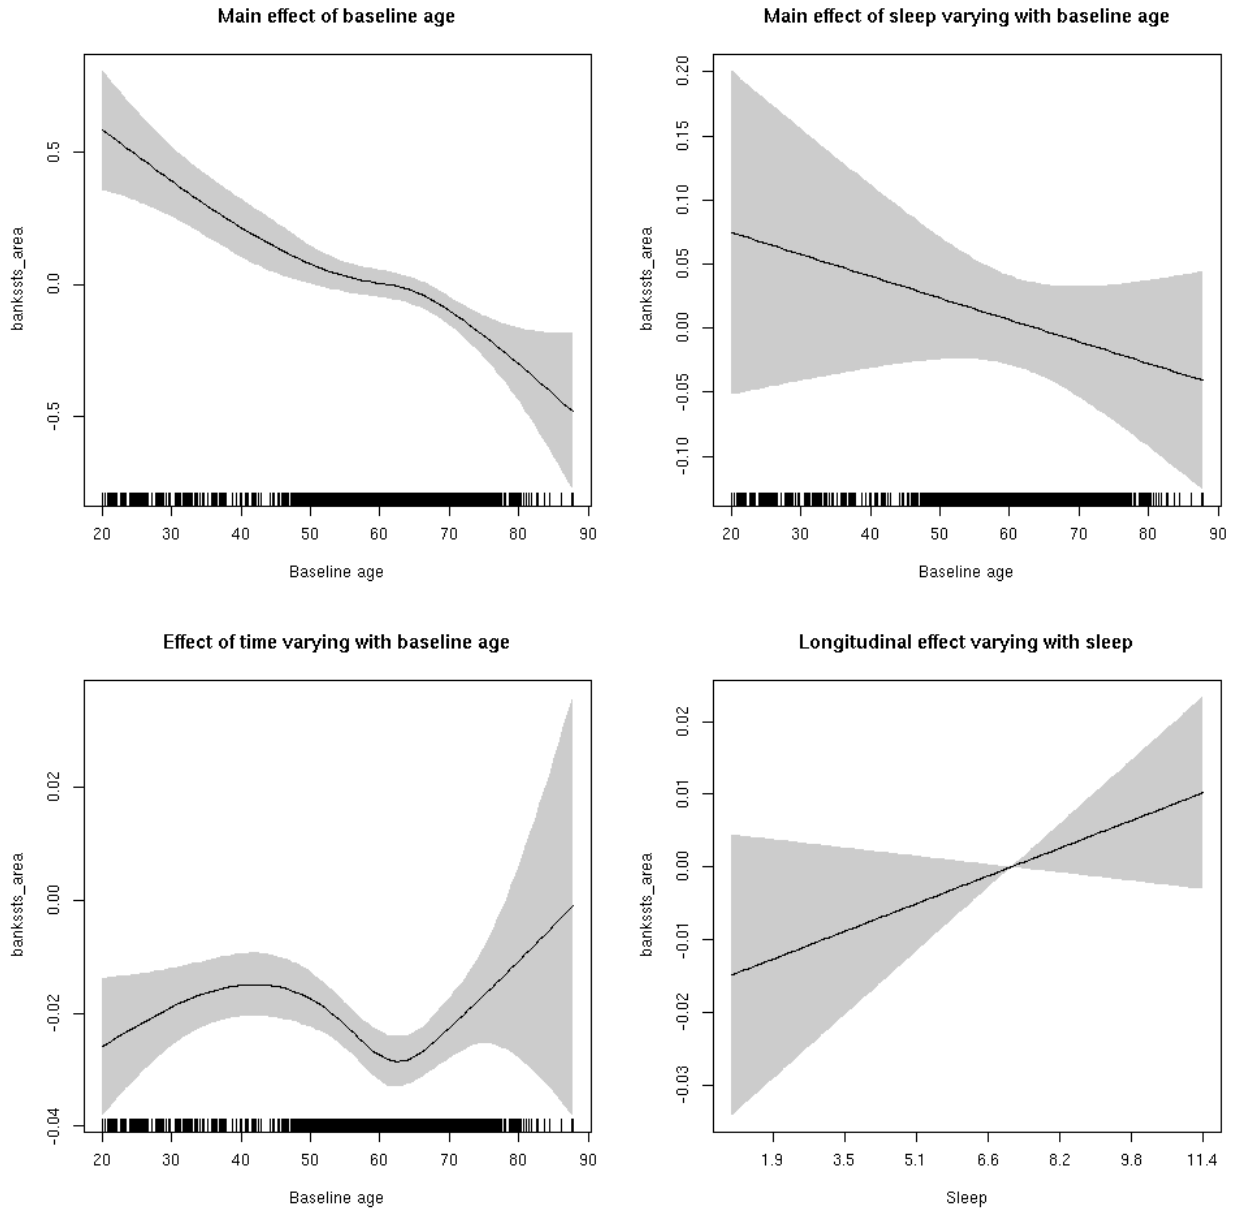

**Male: Full data** Below is the row for `s(sleep_z):time` from the model output.

```
## s(sleep_z):time  1.000  1.000  3.069  0.0799 .
```

Below are plots of a plot of `s(bl_age)`, `s(bl_age):sleep_z`, `s(bl_age):time`, and `s(sleep_z):time`. For `s(sleep_z):time`, roughly, if we cannot fit a straight line through the confidence bands, there is evidence that the effect of time depends on sleep duration. It is correct that the confidence interval is zero at one point along the axis; this happens because we do not include the main effect.

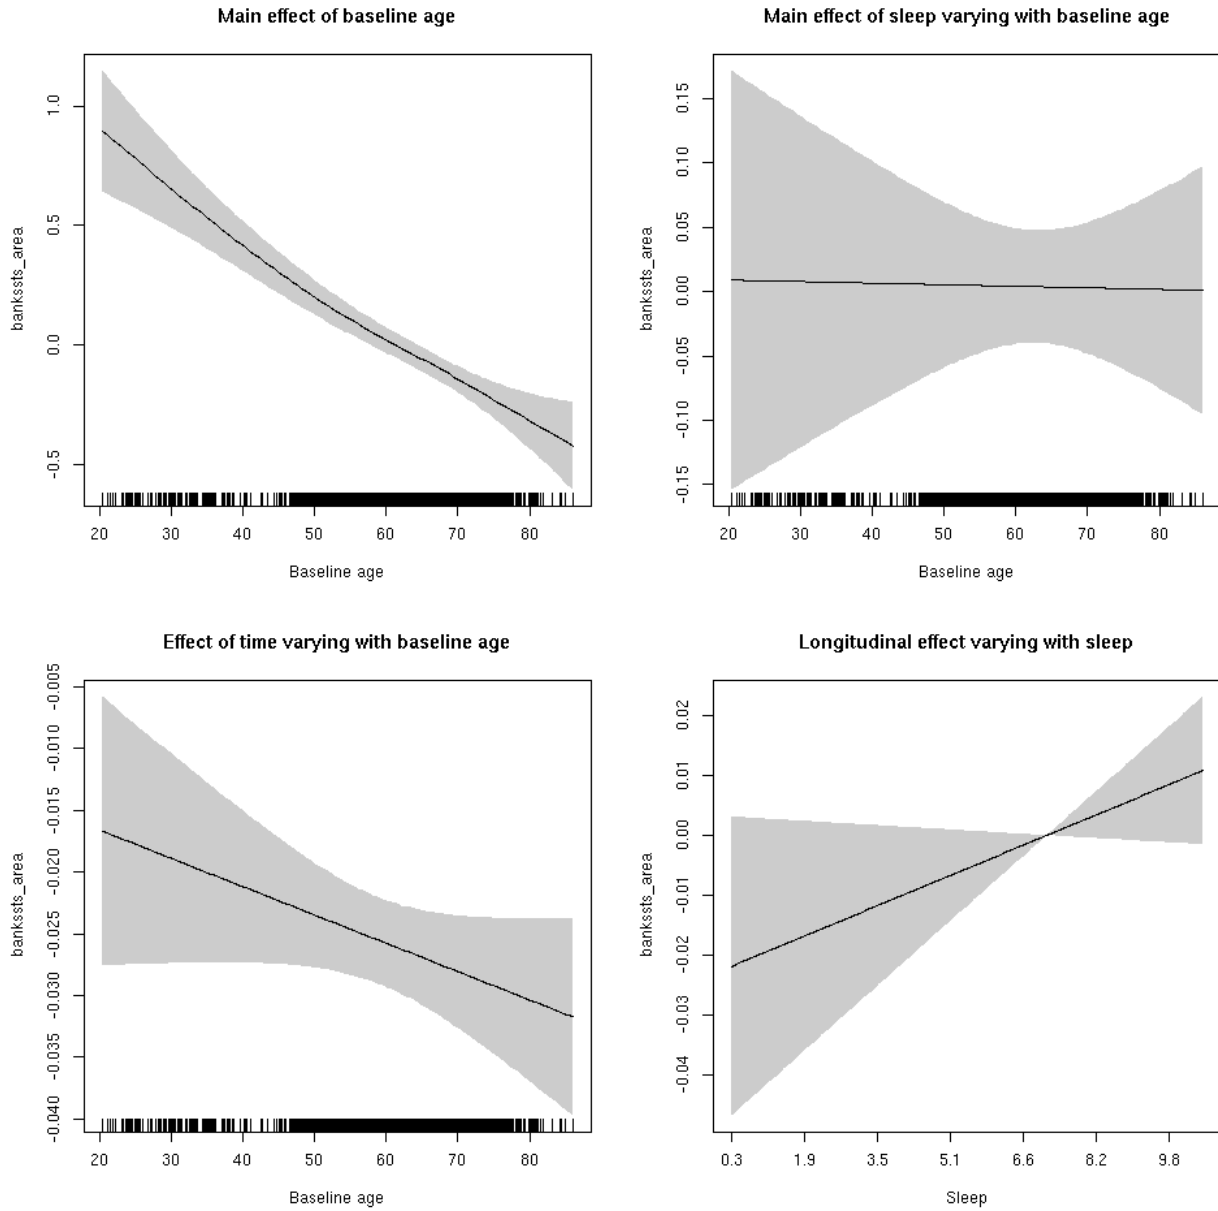

## `bankssts_area`

**Full data** Below is the model output. The term `s(sleep_z):time` is probably what we care most about.

```
##
## Family: gaussian
## Link function: identity
##
## Formula:
## value ~ sex + site + icv + s(bl_age, k = 10, bs = "cr") + s(bl_age,
##   by = sleep_z, bs = "cr") + +s(bl_age, by = time, k = 5, bs = "cr") +
##   s(sleep_z, by = time, k = 5, bs = "cr", pc = 0)
##
```

```

## Parametric coefficients:
##           Estimate Std. Error t value Pr(>|t|)
## (Intercept)  0.61235   0.06302   9.717 < 2e-16 ***
## sexmale      0.08074   0.03235   2.496 0.012580 *
## siteousAvanto -0.57513   0.07673  -7.496 7.27e-14 ***
## siteousPrisma -0.73194   0.13559  -5.398 6.93e-08 ***
## siteousSkyra  -0.21024   0.07436  -2.827 0.004707 **
## siteUB       -0.55573   0.14608  -3.804 0.000143 ***
## siteUCAM     -0.57225   0.07856  -7.284 3.54e-13 ***
## siteUKB      -0.62254   0.06004 -10.369 < 2e-16 ***
## siteUmU      -0.03961   0.09031  -0.439 0.660989
## icv          0.50708   0.01571  32.279 < 2e-16 ***
## ---
## Signif. codes:  0 '***' 0.001 '**' 0.01 '*' 0.05 '.' 0.1 ' ' 1
##
## Approximate significance of smooth terms:
##           edf Ref.df      F p-value
## s(bl_age)      3.566  3.566 43.511 <2e-16 ***
## s(bl_age):sleep_z 2.612  2.612  0.338  0.6222
## s(bl_age):time  4.044  4.044 113.147 <2e-16 ***
## s(sleep_z):time  1.000  1.000  6.019  0.0142 *
## ---
## Signif. codes:  0 '***' 0.001 '**' 0.01 '*' 0.05 '.' 0.1 ' ' 1
##
## R-sq.(adj) =  0.338
## lmer.REML = 7983.5  Scale est. = 0.020328  n = 8175

```

Below are plots of a plot of  $s(\text{bl\_age})$ ,  $s(\text{bl\_age}):\text{sleep\_z}$ ,  $s(\text{bl\_age}):\text{time}$ , and  $s(\text{sleep\_z}):\text{time}$ . For  $s(\text{sleep\_z}):\text{time}$ , roughly, if we cannot fit a straight line through the confidence bands, there is evidence that the effect of time depends on sleep duration. It is correct that the confidence interval is zero at one point along the axis; this happens because we do not include the main effect.



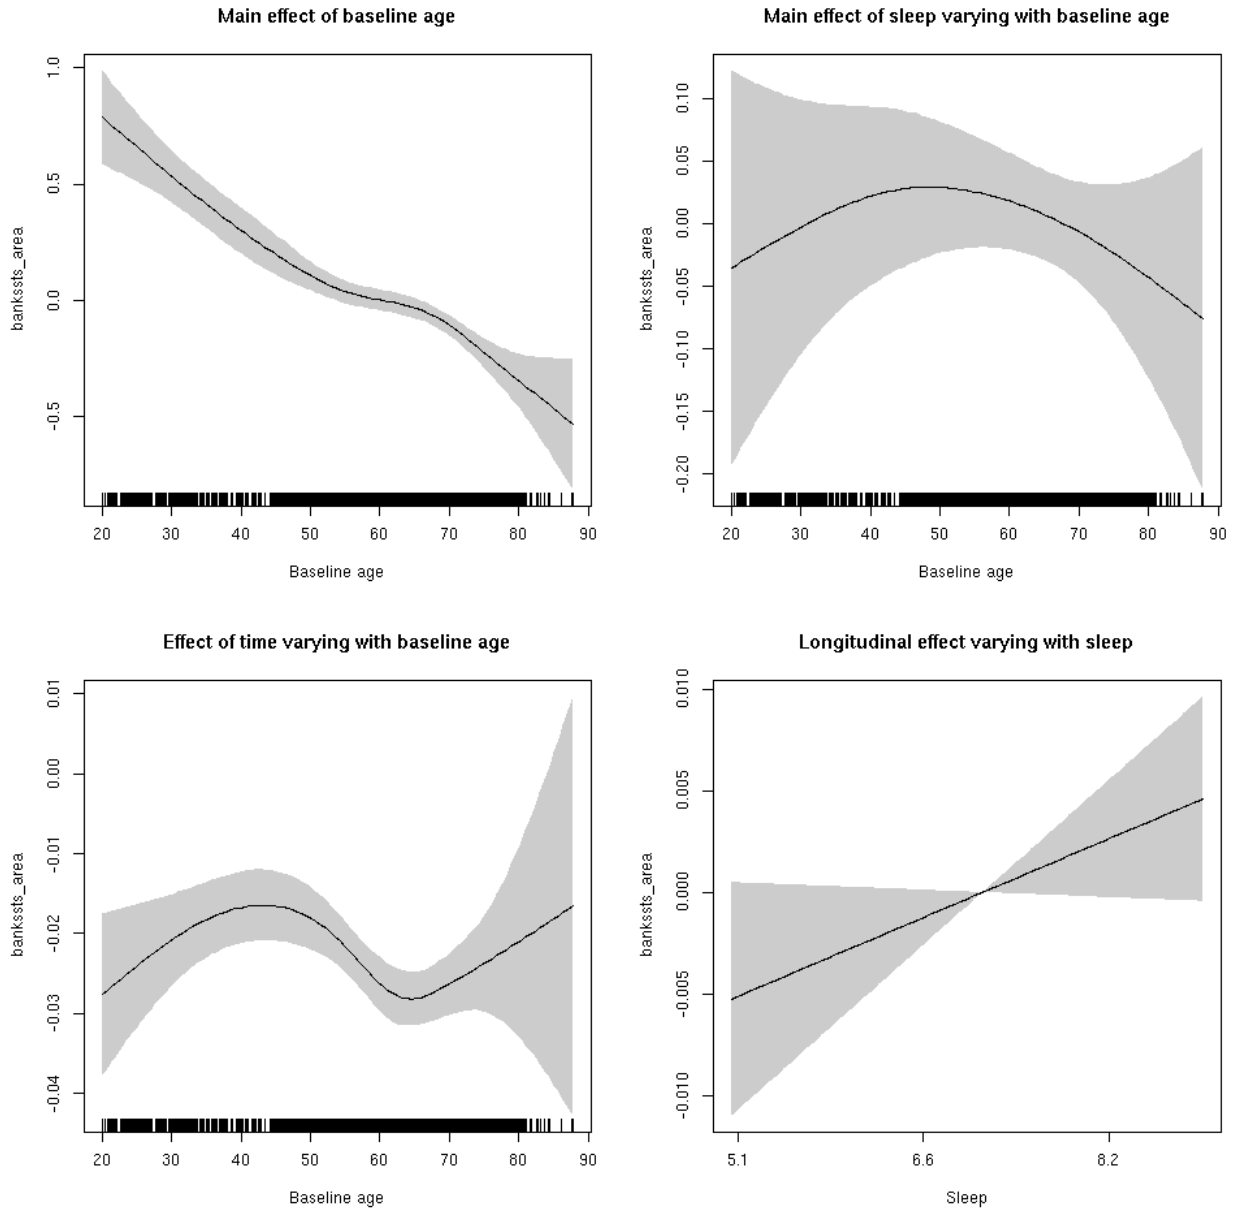

**Restricted to sleep  $\geq 5$  and  $\leq 9$  hours** Below is the row for `s(sleep_z):time` from the model output.

```
## s(sleep_z):time  1.000  1.000  3.339  0.0677 .
```

Below are plots of a plot of `s(bl_age)`, `s(bl_age):sleep_z`, `s(bl_age):time`, and `s(sleep_z):time`. For `s(sleep_z):time`, roughly, if we cannot fit a straight line through the confidence bands, there is evidence that the effect of time depends on sleep duration. It is correct that the confidence interval is zero at one point along the axis; this happens because we do not include the main effect.

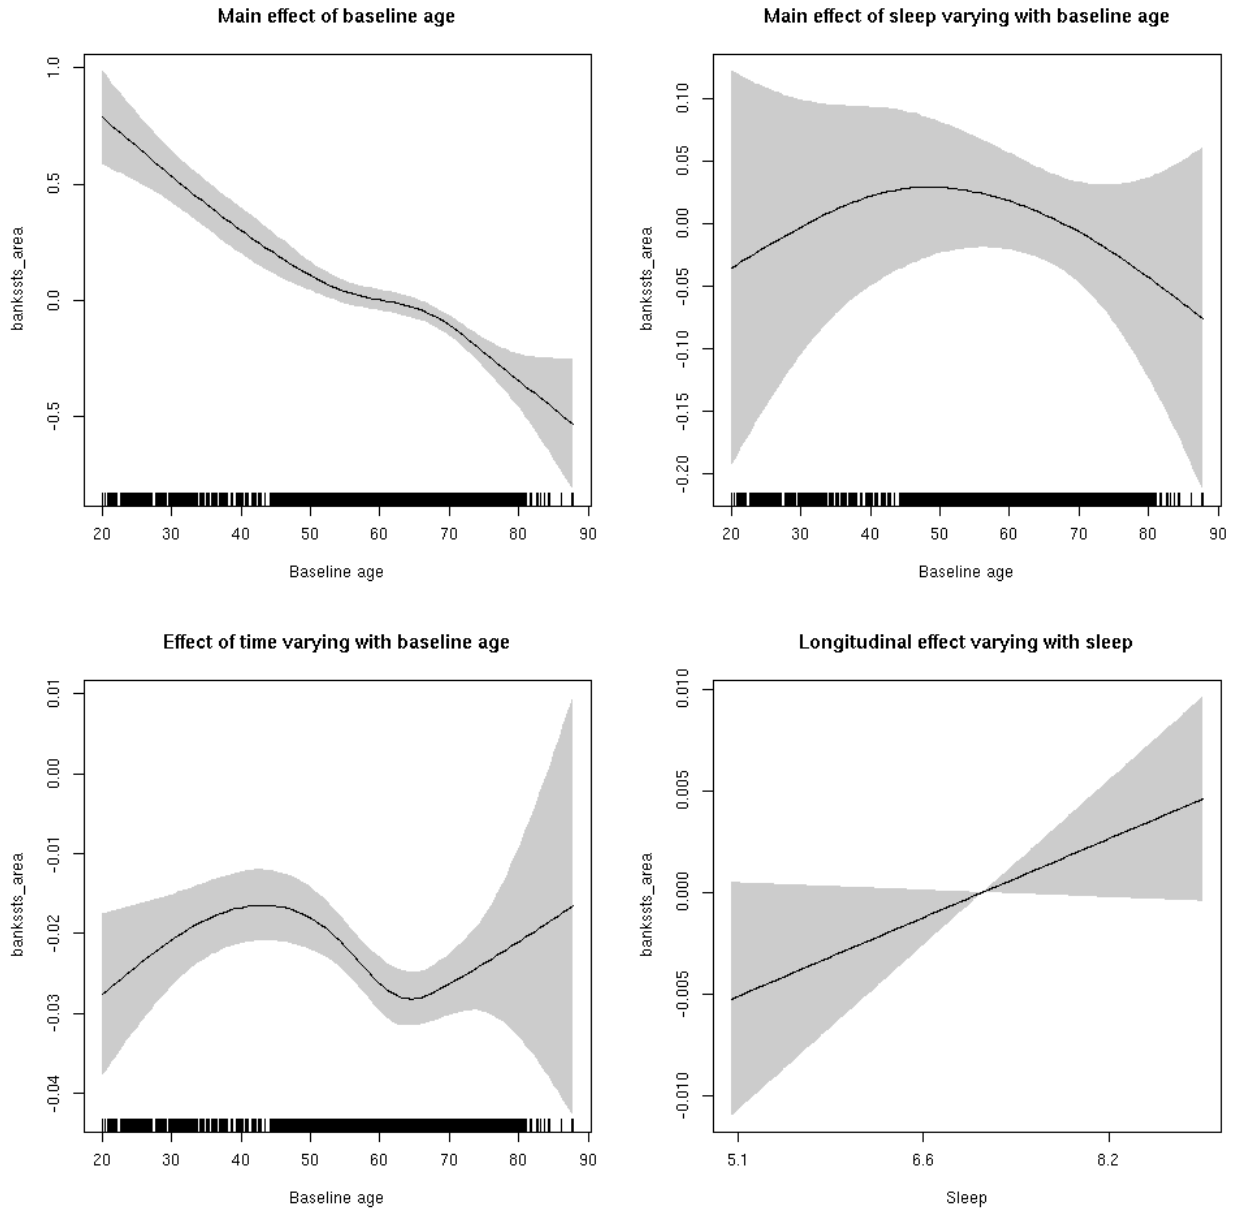

## bankssts\_thickness: Stratified by sex

**Female: Full data** Below is the row for `s(sleep_z):time` from the model output.

```
## s(sleep_z):time  1.000  1.000  0.213  0.645
```

Below are plots of a plot of `s(bl_age)`, `s(bl_age):sleep_z`, `s(bl_age):time`, and `s(sleep_z):time`. For `s(sleep_z):time`, roughly, if we cannot fit a straight line through the confidence bands, there is evidence that the effect of time depends on sleep duration. It is correct that the confidence interval is zero at one point along the axis; this happens because we do not include the main effect.

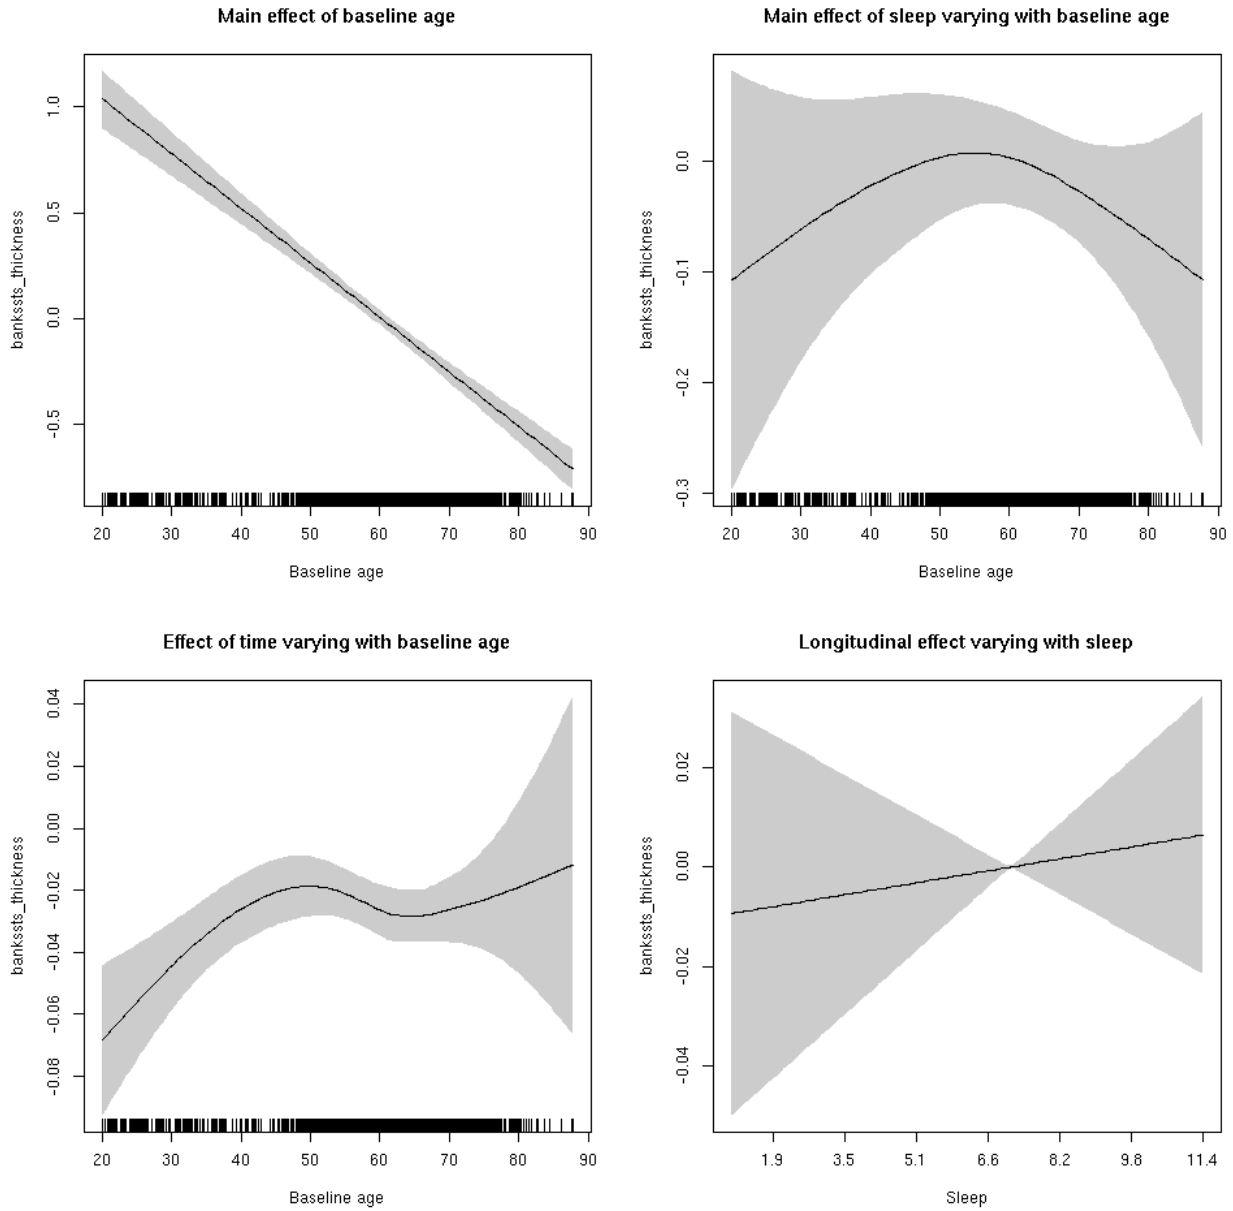

**Male: Full data** Below is the row for `s(sleep_z):time` from the model output.

```
## s(sleep_z):time  1.000  1.000  0.137  0.711
```

Below are plots of a plot of `s(bl_age)`, `s(bl_age):sleep_z`, `s(bl_age):time`, and `s(sleep_z):time`. For `s(sleep_z):time`, roughly, if we cannot fit a straight line through the confidence bands, there is evidence that the effect of time depends on sleep duration. It is correct that the confidence interval is zero at one point along the axis; this happens because we do not include the main effect.

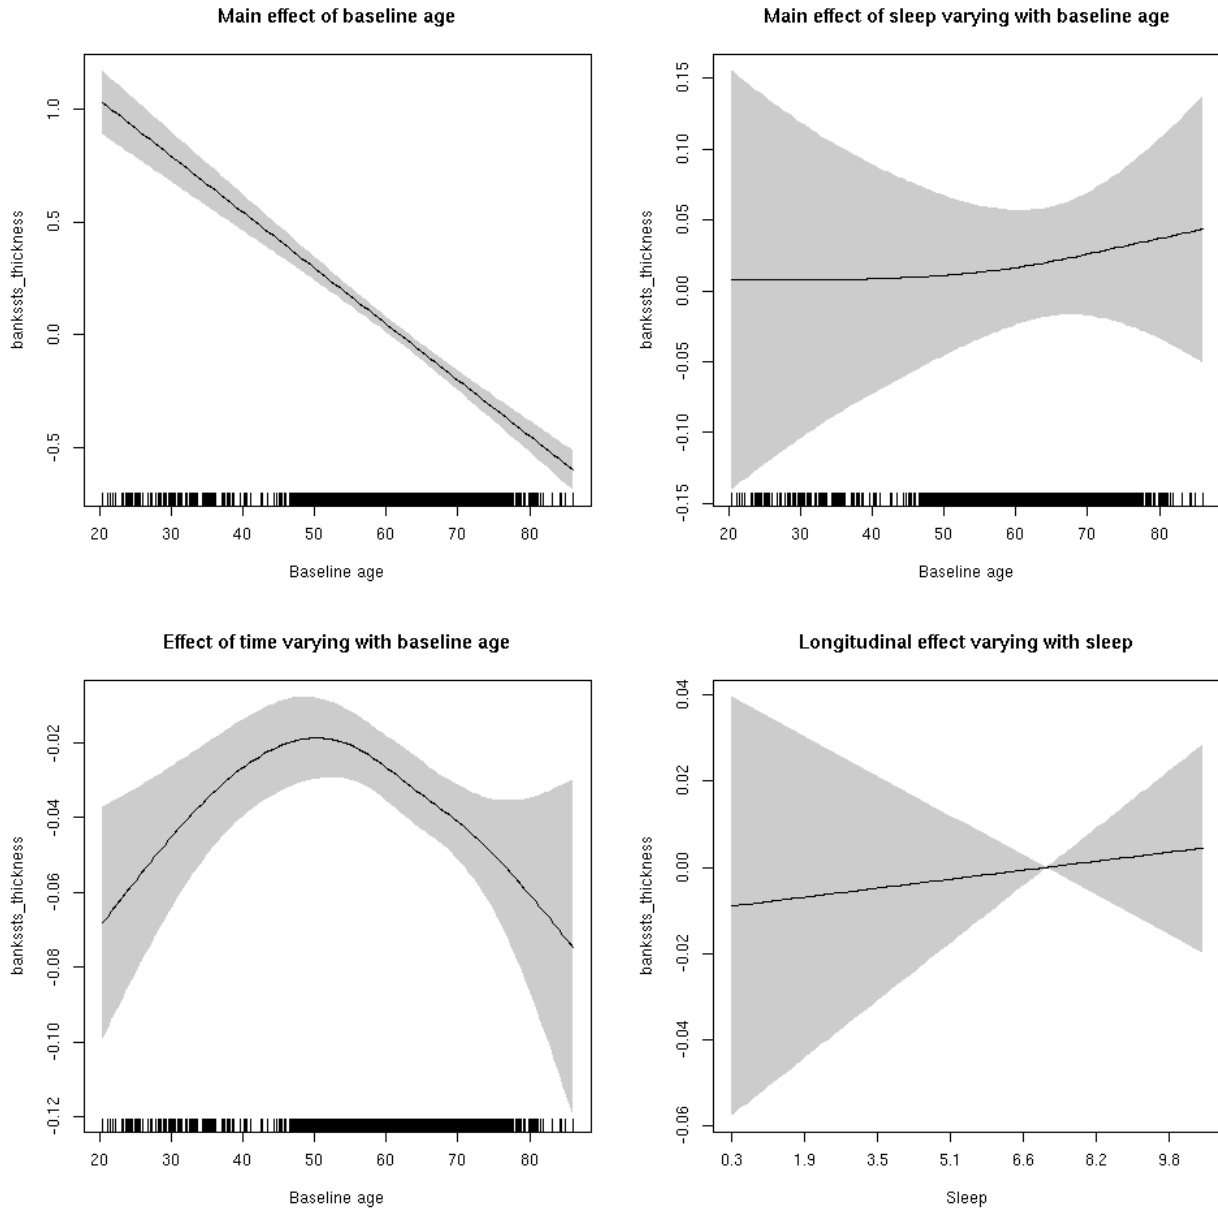

## `bankssts_thickness`

**Full data** Below is the model output. The term `s(sleep_z):time` is probably what we care most about.

```
##
## Family: gaussian
## Link function: identity
##
## Formula:
## value ~ sex + site + s(bl_age, k = 10, bs = "cr") + s(bl_age,
##   by = sleep_z, bs = "cr") + +s(bl_age, by = time, k = 5, bs = "cr") +
##   s(sleep_z, by = time, k = 5, bs = "cr", pc = 0)
## <environment: 0x5630035768d8>
```

```

##
## Parametric coefficients:
##           Estimate Std. Error t value Pr(>|t|)
## (Intercept) -1.51899    0.04786 -31.741 < 2e-16 ***
## sexmale     -0.06979    0.02463  -2.834  0.00461 **
## siteousAvanto  0.11476    0.06441   1.782  0.07482 .
## siteousPrisma  0.52722    0.22701   2.322  0.02024 *
## siteousSkyra   0.28435    0.06430   4.422  9.90e-06 ***
## siteUB        0.41214    0.13074   3.152  0.00163 **
## siteUCAM      0.42386    0.06660   6.364  2.07e-10 ***
## siteUKB       1.77664    0.04746  37.437 < 2e-16 ***
## siteUmU      -0.15292    0.08030  -1.904  0.05689 .
## ---
## Signif. codes:  0 '***' 0.001 '**' 0.01 '*' 0.05 '.' 0.1 ' ' 1
##
## Approximate significance of smooth terms:
##           edf Ref.df      F p-value
## s(bl_age)      1.000  1.000 468.586 <2e-16 ***
## s(bl_age):sleep_z 2.000  2.000   0.008  0.992
## s(bl_age):time  3.933  3.933 50.506 <2e-16 ***
## s(sleep_z):time  1.000  1.000   0.394  0.530
## ---
## Signif. codes:  0 '***' 0.001 '**' 0.01 '*' 0.05 '.' 0.1 ' ' 1
##
## R-sq.(adj) =  0.476
## lmer.REML = 13280  Scale est. = 0.083521  n = 8166

```

Below are plots of a plot of  $s(\text{bl\_age})$ ,  $s(\text{bl\_age}):\text{sleep\_z}$ ,  $s(\text{bl\_age}):\text{time}$ , and  $s(\text{sleep\_z}):\text{time}$ . For  $s(\text{sleep\_z}):\text{time}$ , roughly, if we cannot fit a straight line through the confidence bands, there is evidence that the effect of time depends on sleep duration. It is correct that the confidence interval is zero at one point along the axis; this happens because we do not include the main effect.

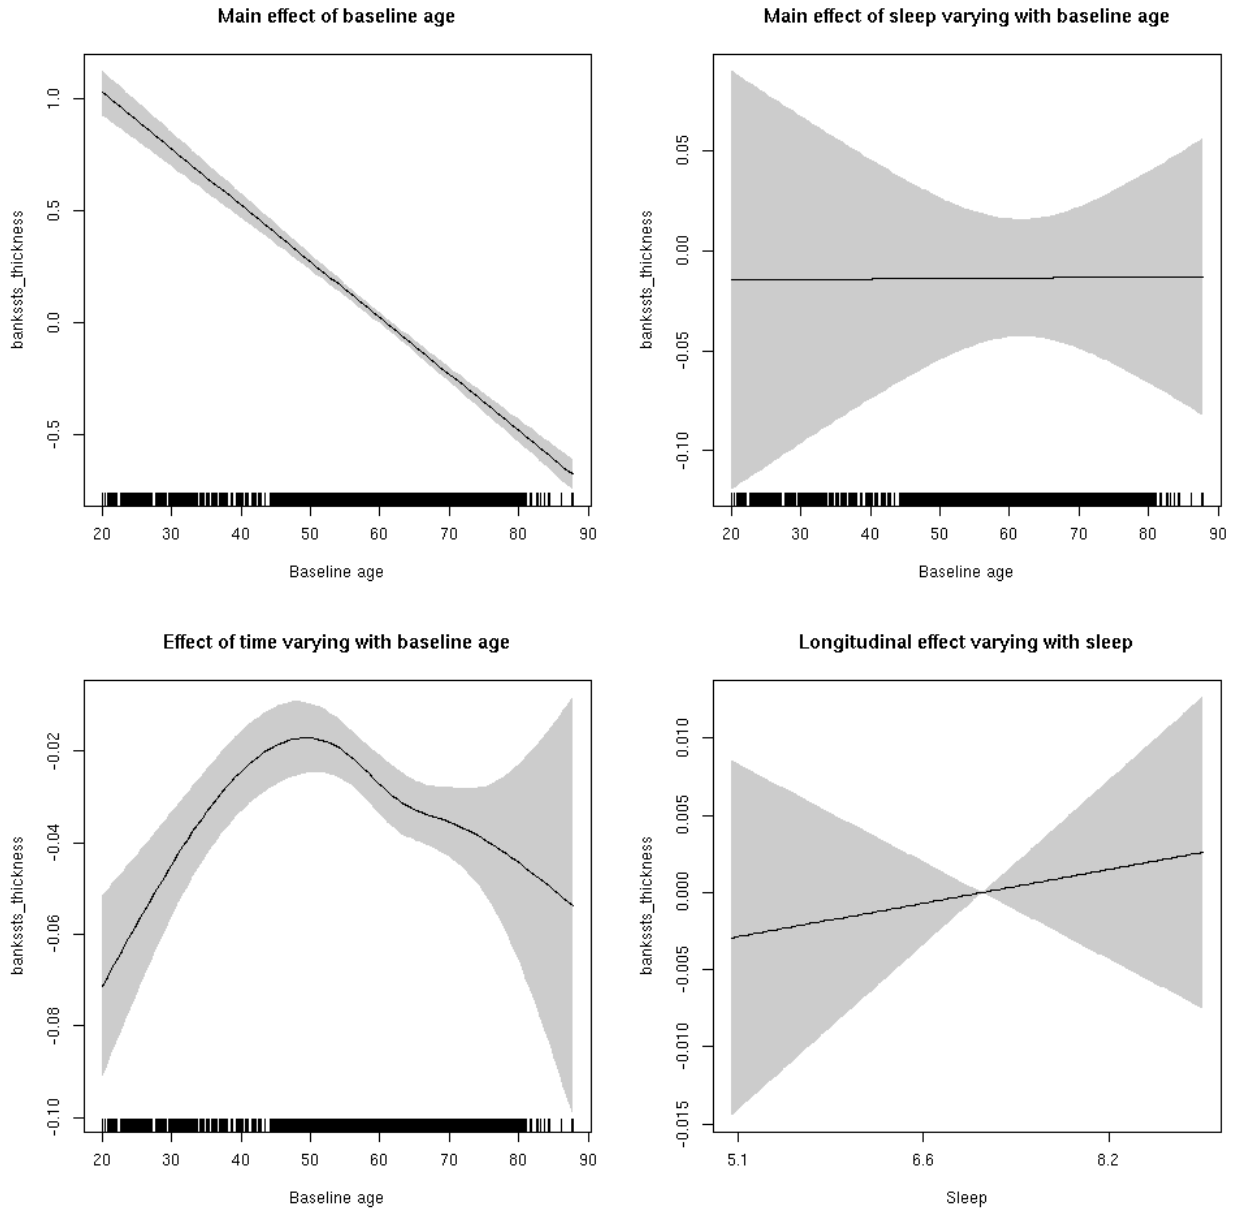

**Restricted to sleep  $\geq 5$  and  $\leq 9$  hours** Below is the row for `s(sleep_z):time` from the model output.

```
## s(sleep_z):time  1.00  1.00  0.262  0.608
```

Below are plots of a plot of `s(bl_age)`, `s(bl_age):sleep_z`, `s(bl_age):time`, and `s(sleep_z):time`. For `s(sleep_z):time`, roughly, if we cannot fit a straight line through the confidence bands, there is evidence that the effect of time depends on sleep duration. It is correct that the confidence interval is zero at one point along the axis; this happens because we do not include the main effect.

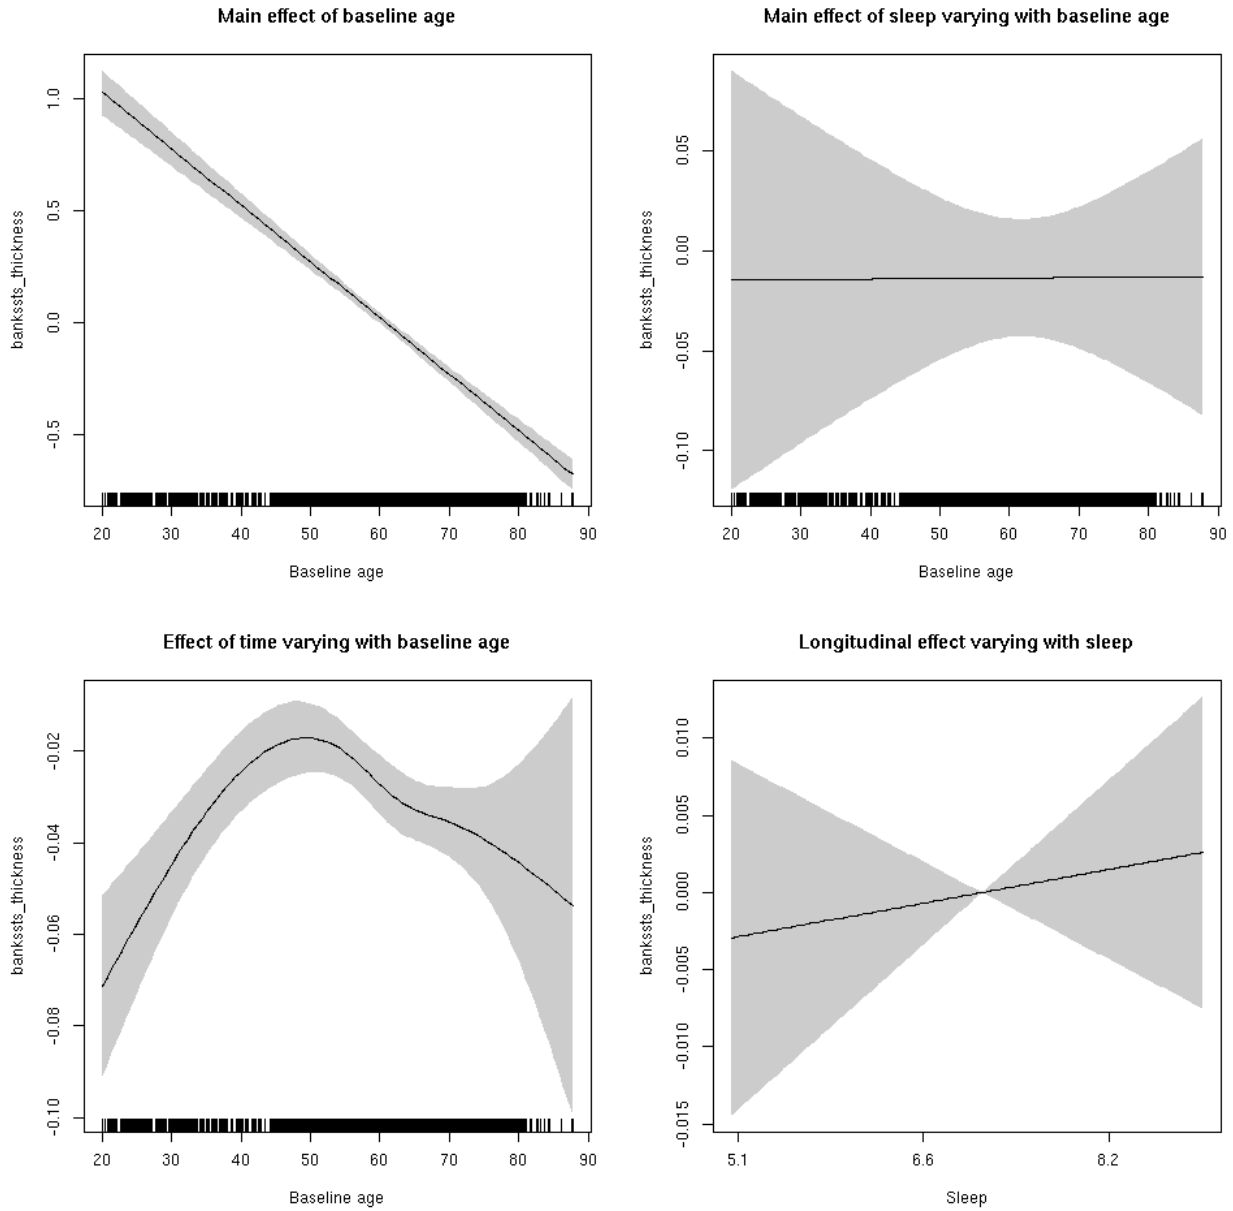

### bankssts\_volume: Stratified by sex

**Female: Full data** Below is the row for `s(sleep_z):time` from the model output.

```
## s(sleep_z):time  1.000  1.000  0.189  0.664
```

Below are plots of a plot of `s(bl_age)`, `s(bl_age):sleep_z`, `s(bl_age):time`, and `s(sleep_z):time`. For `s(sleep_z):time`, roughly, if we cannot fit a straight line through the confidence bands, there is evidence that the effect of time depends on sleep duration. It is correct that the confidence interval is zero at one point along the axis; this happens because we do not include the main effect.

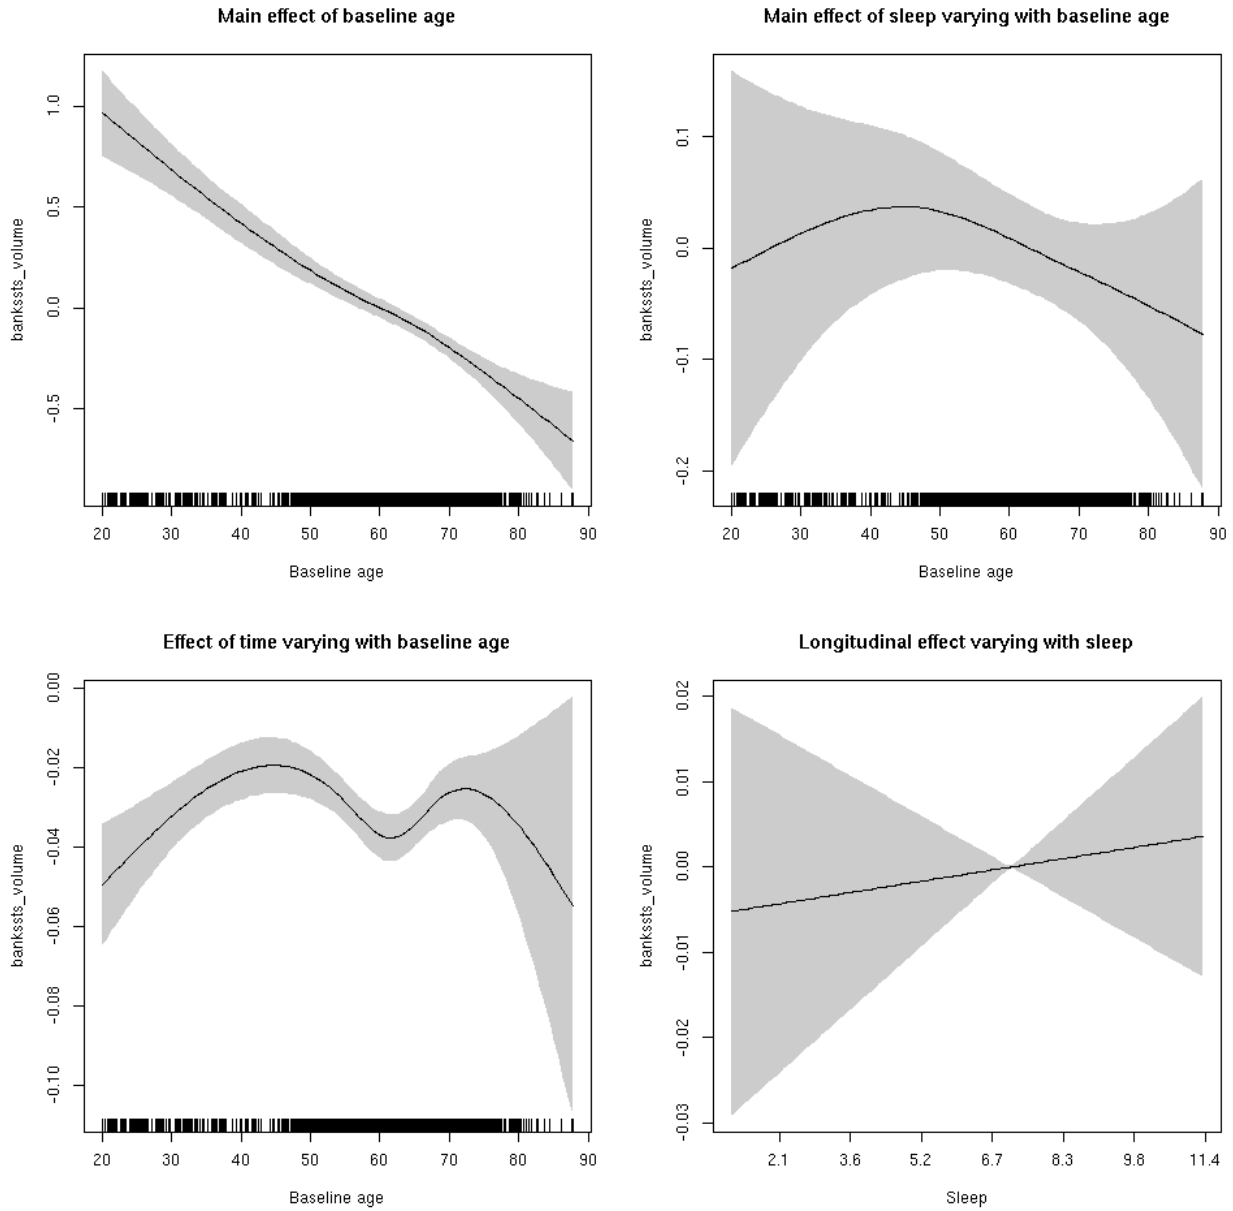

**Male: Full data** Below is the row for `s(sleep_z):time` from the model output.

```
## s(sleep_z):time  1.000  1.000  0.657  0.418
```

Below are plots of a plot of `s(bl_age)`, `s(bl_age):sleep_z`, `s(bl_age):time`, and `s(sleep_z):time`. For `s(sleep_z):time`, roughly, if we cannot fit a straight line through the confidence bands, there is evidence that the effect of time depends on sleep duration. It is correct that the confidence interval is zero at one point along the axis; this happens because we do not include the main effect.



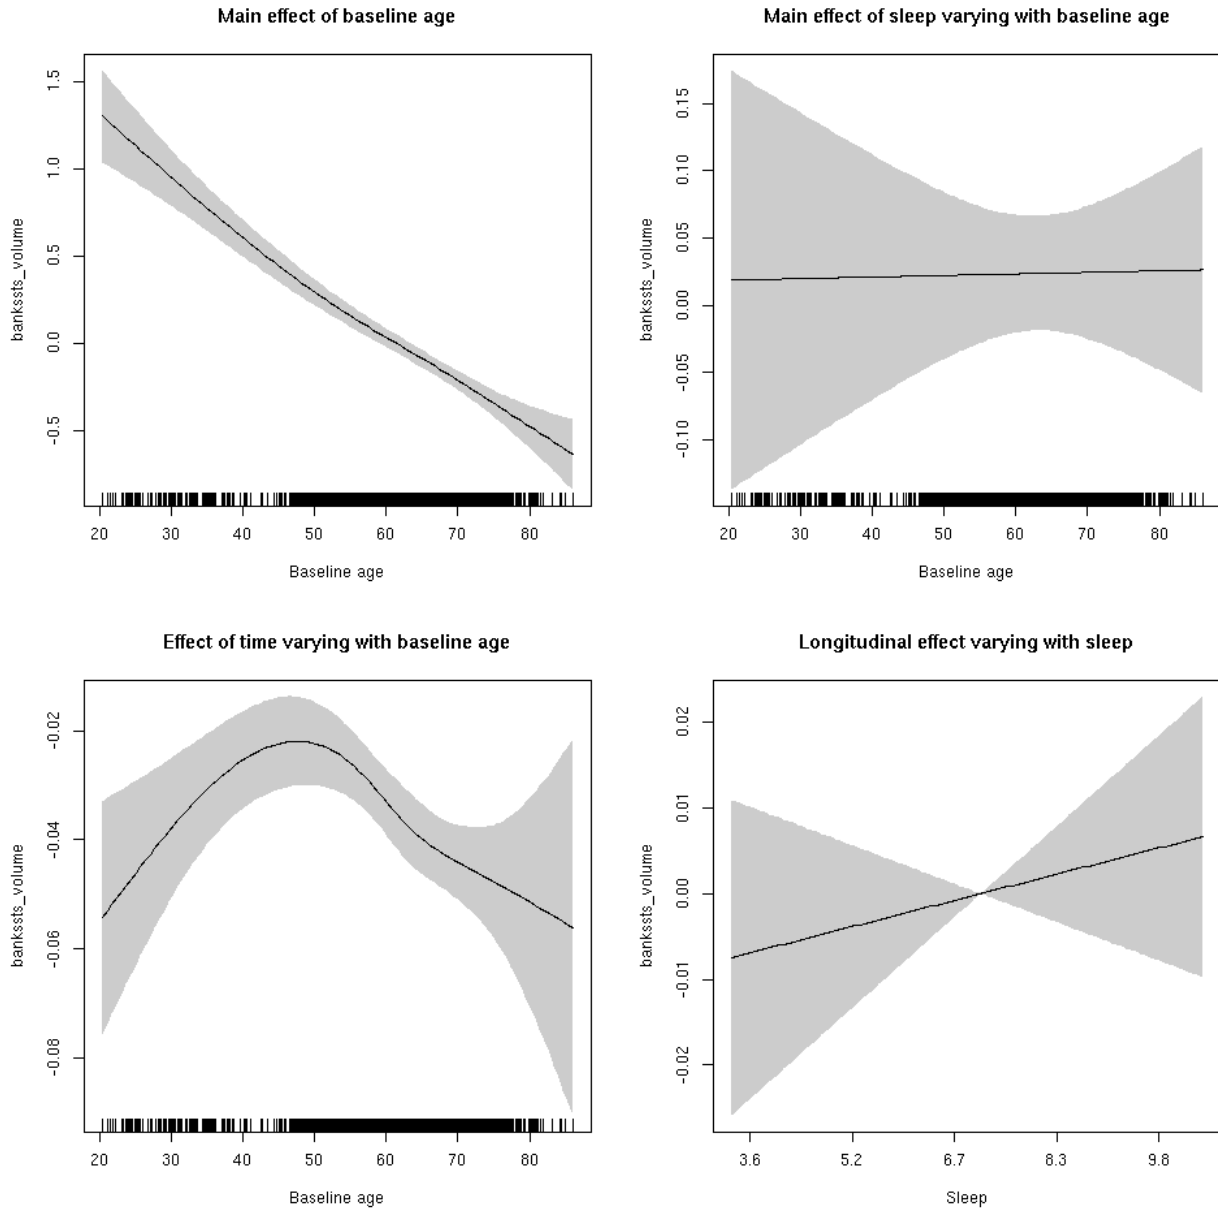

## bankssts\_volume

**Full data** Below is the model output. The term `s(sleep_z):time` is probably what we care most about.

```
##
## Family: gaussian
## Link function: identity
##
## Formula:
## value ~ sex + site + icv + s(bl_age, k = 10, bs = "cr") + s(bl_age,
##   by = sleep_z, bs = "cr") + +s(bl_age, by = time, k = 5, bs = "cr") +
##   s(sleep_z, by = time, k = 5, bs = "cr", pc = 0)
## <environment: 0x56300353d3c8>
```

```

##
## Parametric coefficients:
##           Estimate Std. Error t value Pr(>|t|)
## (Intercept) -0.08526   0.06109  -1.396 0.162859
## sexmale      0.04572   0.03137   1.457 0.145075
## siteousAvanto -0.56471  0.07447  -7.583 3.75e-14 ***
## siteousPrisma -0.52362  0.15890  -3.295 0.000988 ***
## siteousSkyra  -0.09834  0.07211  -1.364 0.172699
## siteUB       -0.34889  0.14088  -2.476 0.013289 *
## siteUCAM     -0.39310  0.07591  -5.178 2.29e-07 ***
## siteUKB      0.17545  0.05808   3.021 0.002528 **
## siteUmU     -0.12024  0.08725  -1.378 0.168188
## icv          0.47645  0.01539  30.960 < 2e-16 ***
## ---
## Signif. codes:  0 '***' 0.001 '**' 0.01 '*' 0.05 '.' 0.1 ' ' 1
##
## Approximate significance of smooth terms:
##           edf Ref.df      F p-value
## s(bl_age)      3.385  3.385 120.533 <2e-16 ***
## s(bl_age):sleep_z 2.788  2.788   0.581   0.487
## s(bl_age):time  4.512  4.512 120.944 <2e-16 ***
## s(sleep_z):time  1.000  1.000   0.660   0.417
## ---
## Signif. codes:  0 '***' 0.001 '**' 0.01 '*' 0.05 '.' 0.1 ' ' 1
##
## R-sq.(adj) =  0.369
## lmer.REML = 9748.9  Scale est. = 0.032785  n = 8172

```

Below are plots of a plot of  $s(\text{bl\_age})$ ,  $s(\text{bl\_age}):\text{sleep\_z}$ ,  $s(\text{bl\_age}):\text{time}$ , and  $s(\text{sleep\_z}):\text{time}$ . For  $s(\text{sleep\_z}):\text{time}$ , roughly, if we cannot fit a straight line through the confidence bands, there is evidence that the effect of time depends on sleep duration. It is correct the that confidence interval is zero at one point along the axis; this happens because we do not include the main effect.

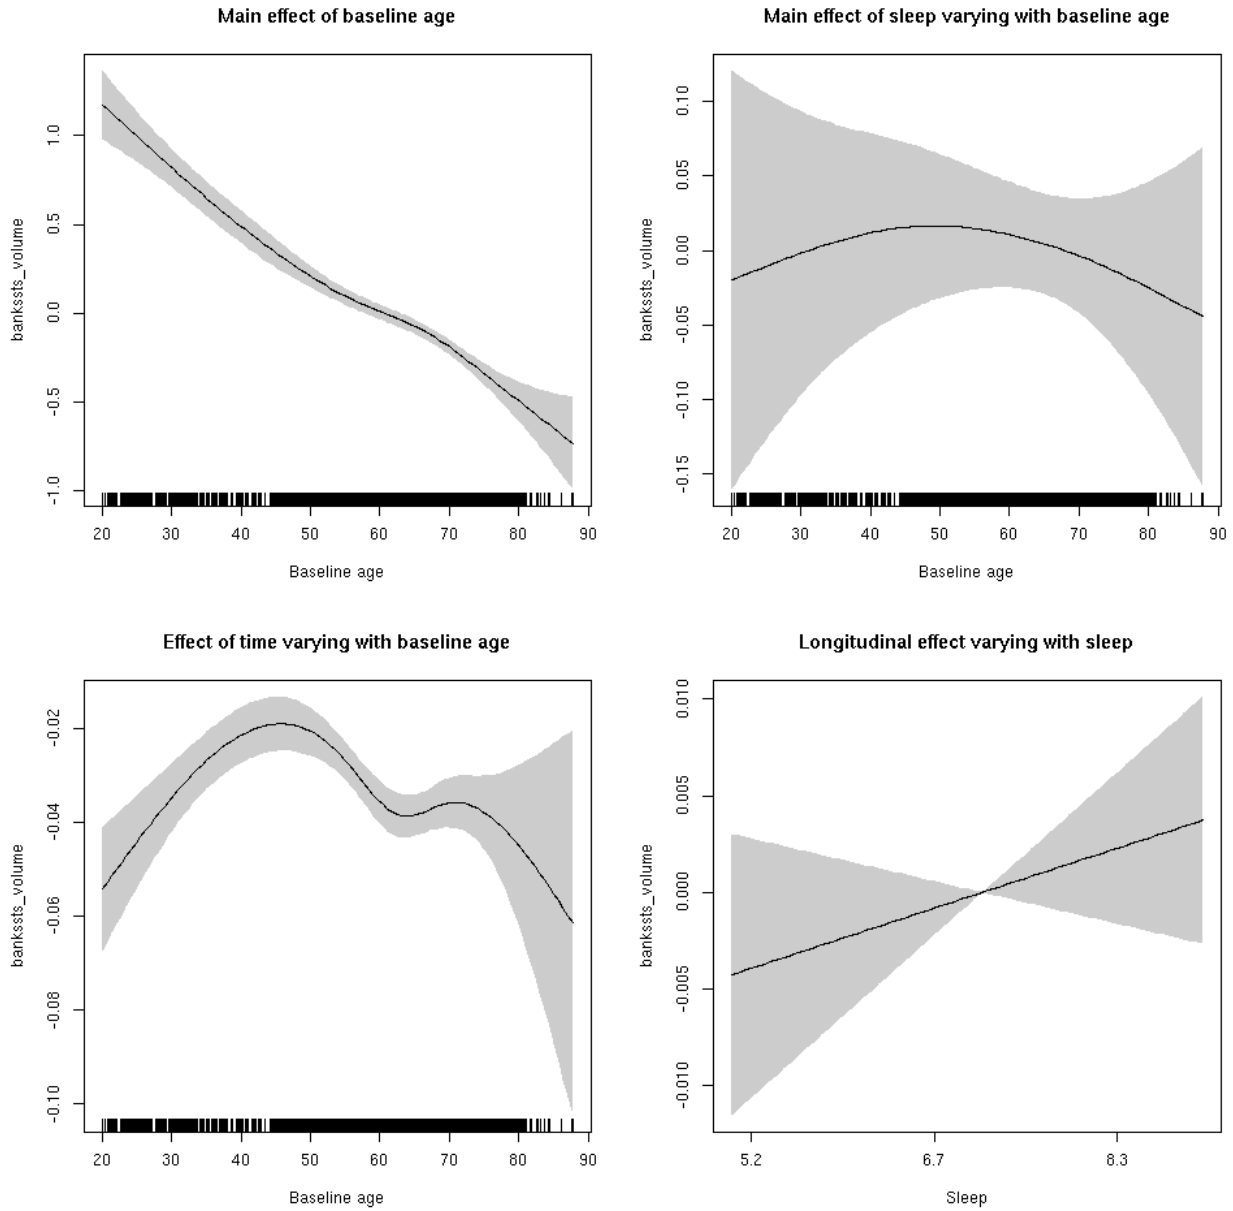

**Restricted to sleep  $\geq 5$  and  $\leq 9$  hours** Below is the row for `s(sleep_z):time` from the model output.

```
## s(sleep_z):time 1.000 1.000 1.364 0.243
```

Below are plots of a plot of `s(bl_age)`, `s(bl_age):sleep_z`, `s(bl_age):time`, and `s(sleep_z):time`. For `s(sleep_z):time`, roughly, if we cannot fit a straight line through the confidence bands, there is evidence that the effect of time depends on sleep duration. It is correct that the confidence interval is zero at one point along the axis; this happens because we do not include the main effect.

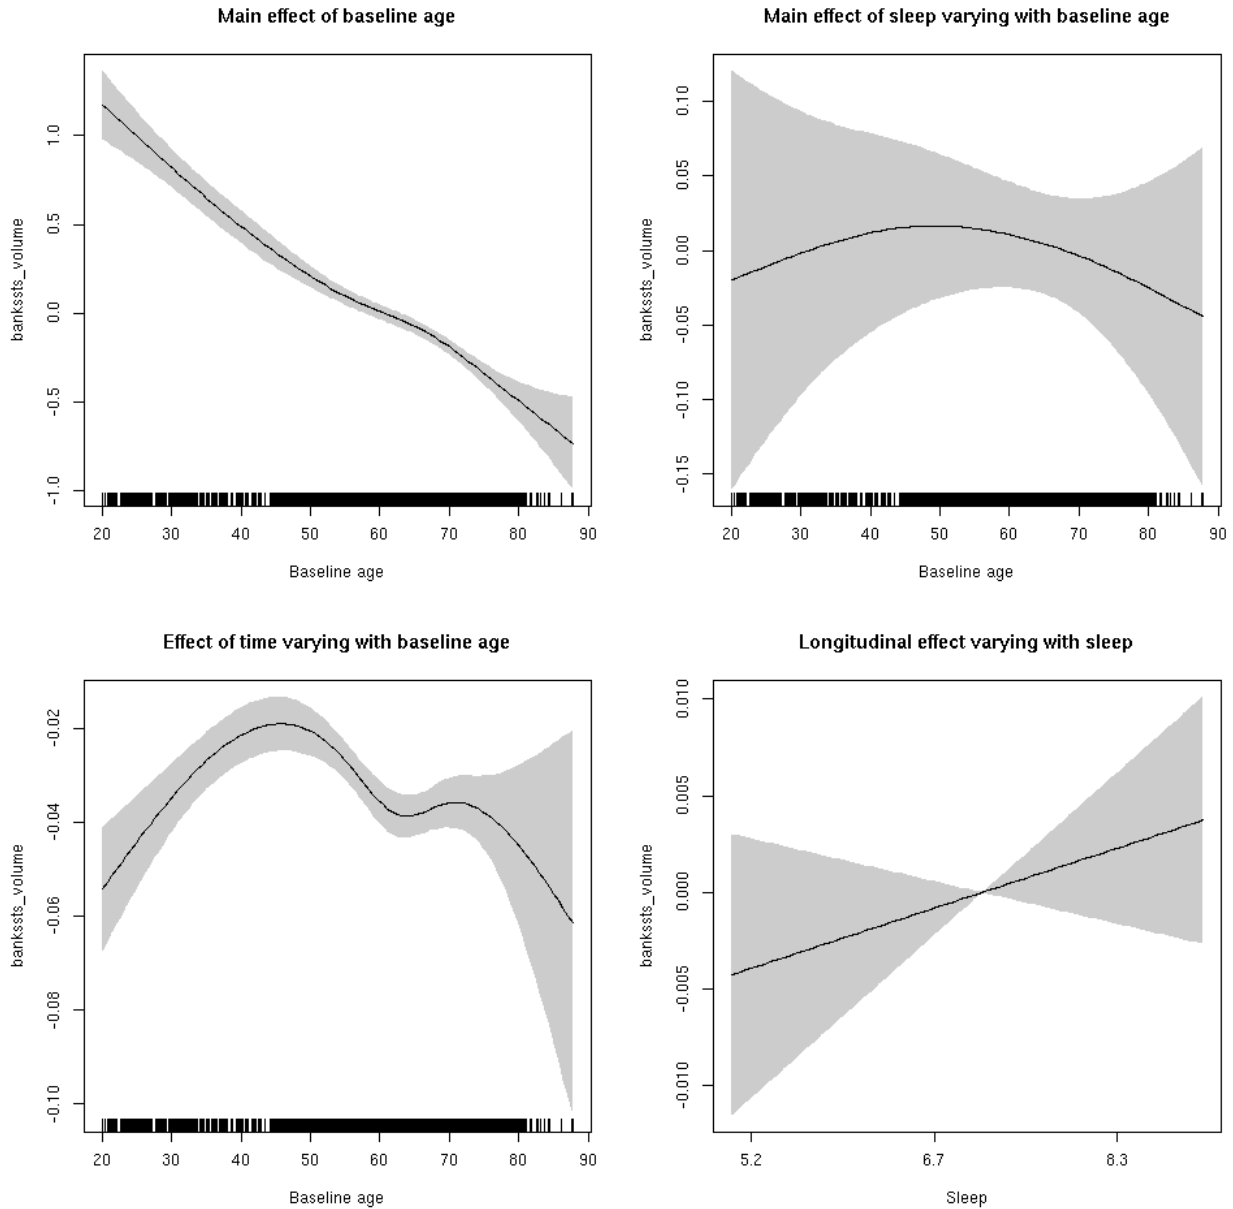

### caudalanteriorcingulate\_area: Stratified by sex

**Female: Full data** Below is the row for `s(sleep_z):time` from the model output.

```
## s(sleep_z):time  1.000  1.000  0.224  0.636
```

Below are plots of a plot of `s(bl_age)`, `s(bl_age):sleep_z`, `s(bl_age):time`, and `s(sleep_z):time`. For `s(sleep_z):time`, roughly, if we cannot fit a straight line through the confidence bands, there is evidence that the effect of time depends on sleep duration. It is correct that the confidence interval is zero at one point along the axis; this happens because we do not include the main effect.

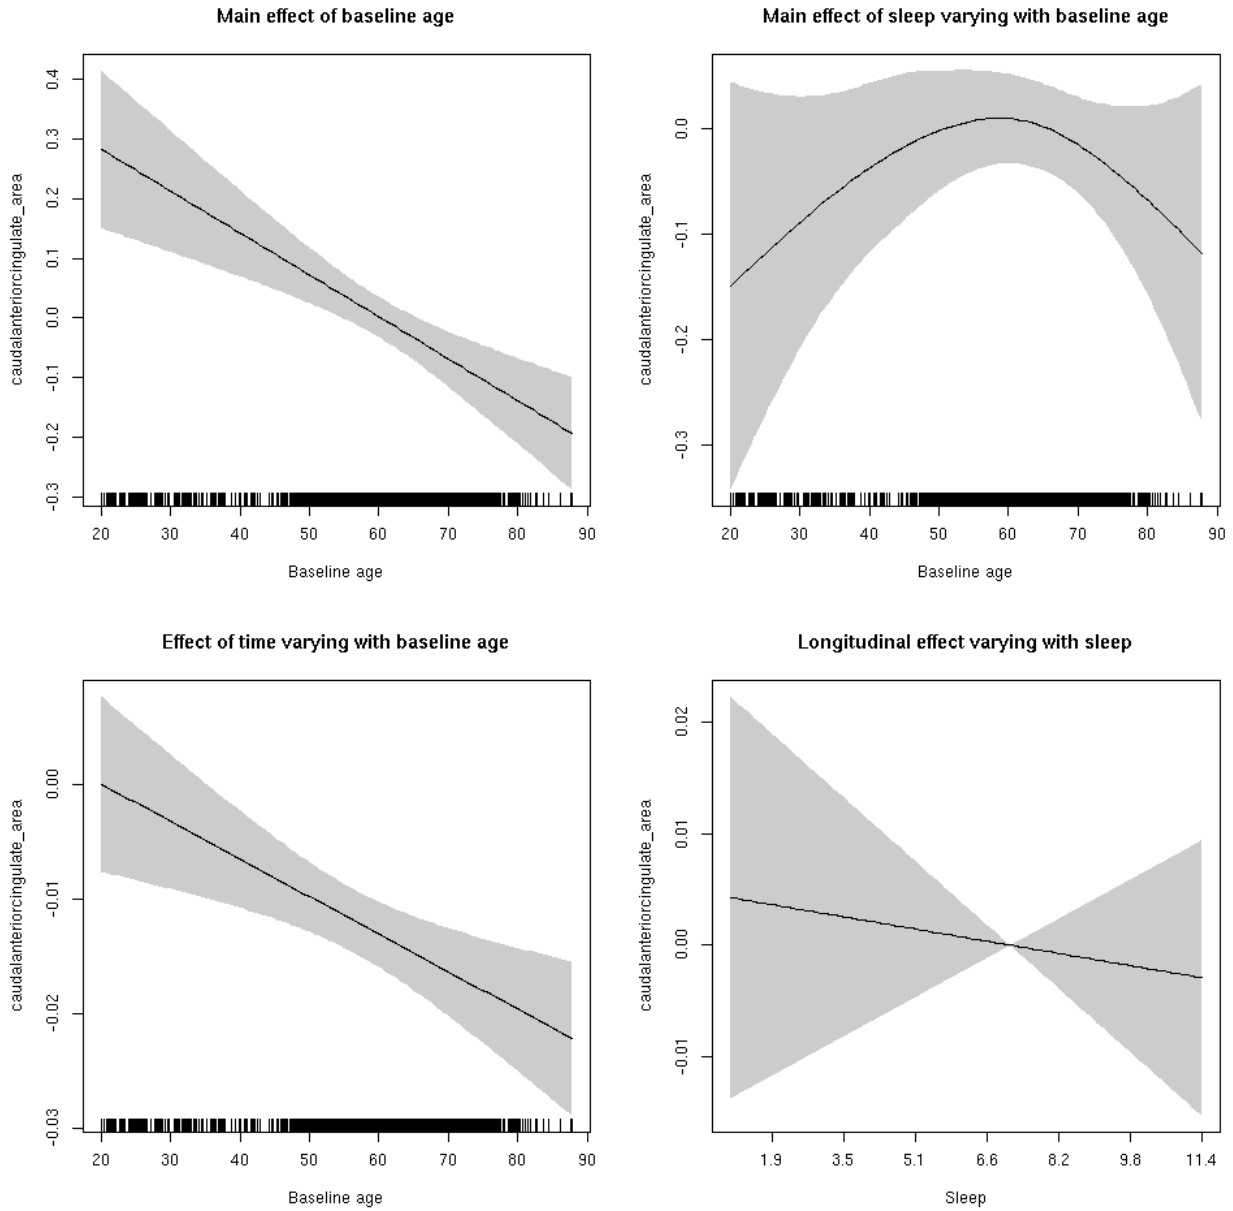

**Male: Full data** Below is the row for `s(sleep_z):time` from the model output.

```
## s(sleep_z):time  1.000  1.000  0.157  0.692
```

Below are plots of a plot of `s(bl_age)`, `s(bl_age):sleep_z`, `s(bl_age):time`, and `s(sleep_z):time`. For `s(sleep_z):time`, roughly, if we cannot fit a straight line through the confidence bands, there is evidence that the effect of time depends on sleep duration. It is correct that the confidence interval is zero at one point along the axis; this happens because we do not include the main effect.

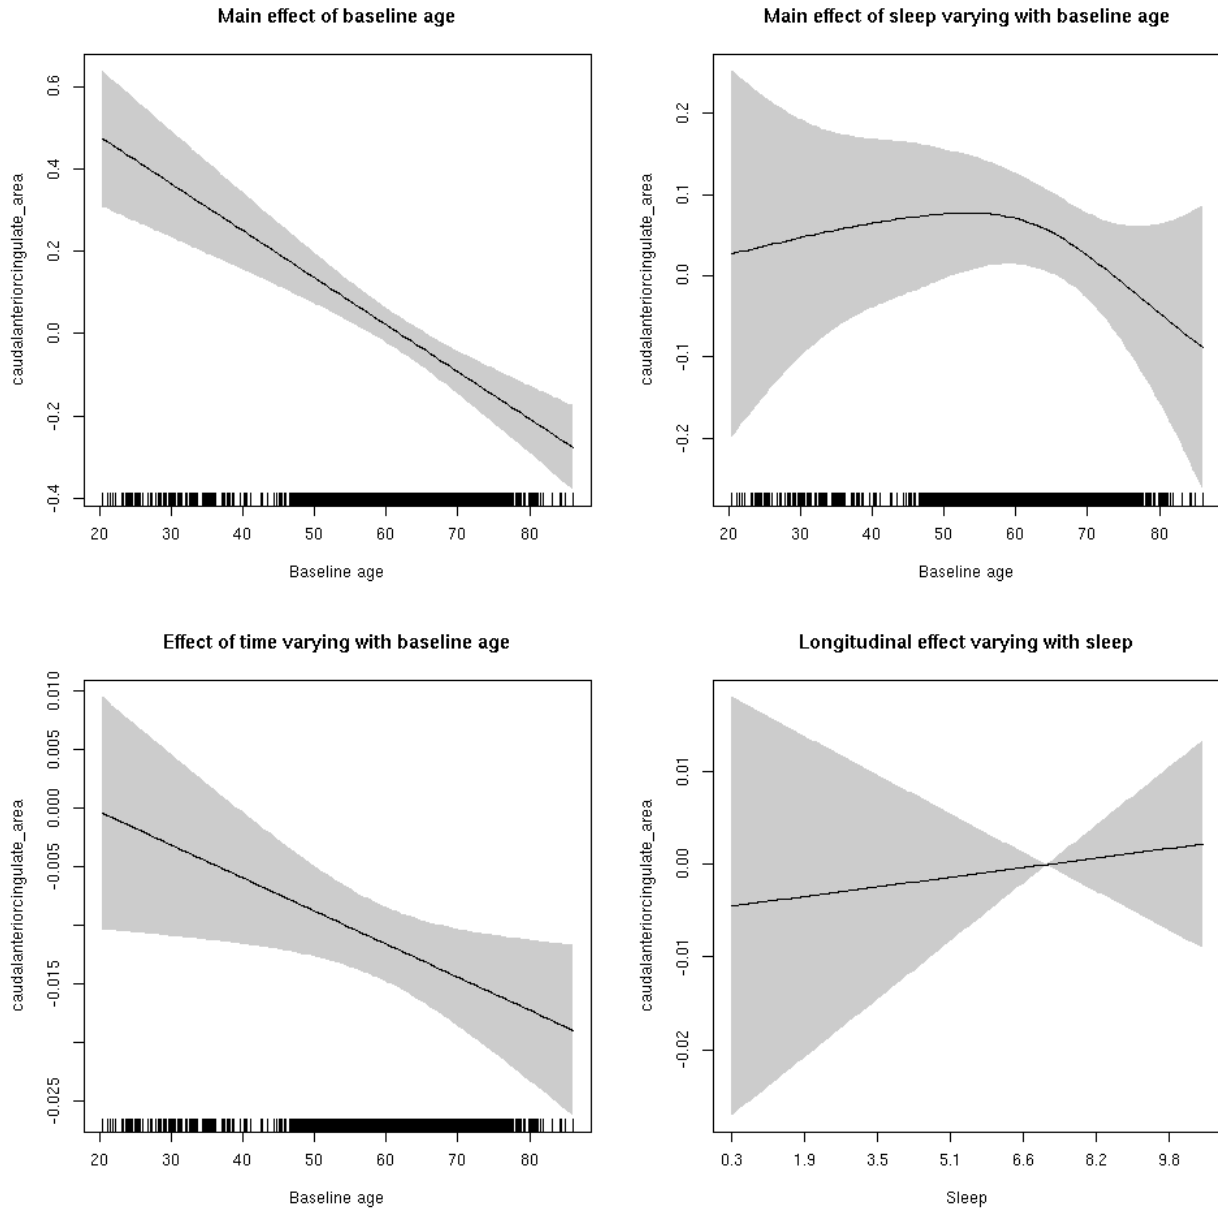

## caudalanteriorcingulate\_area

**Full data** Below is the model output. The term `s(sleep_z):time` is probably what we care most about.

```
##
## Family: gaussian
## Link function: identity
##
## Formula:
## value ~ sex + site + icv + s(bl_age, k = 10, bs = "cr") + s(bl_age,
##   by = sleep_z, bs = "cr") + +s(bl_age, by = time, k = 5, bs = "cr") +
##   s(sleep_z, by = time, k = 5, bs = "cr", pc = 0)
## <environment: 0x563003593db0>
```

```

##
## Parametric coefficients:
##           Estimate Std. Error t value Pr(>|t|)
## (Intercept)  1.1065989  0.0615851  17.969 < 2e-16 ***
## sexmale      -0.0001814  0.0320020  -0.006 0.995478
## siteousAvanto -0.6096287  0.0757829  -8.044 9.89e-16 ***
## siteousPrisma -0.4371680  0.1281334  -3.412 0.000648 ***
## siteousSkyra  -0.3861897  0.0734294  -5.259 1.48e-07 ***
## siteUB       -0.5649774  0.1445815  -3.908 9.39e-05 ***
## siteUCAM     -0.6653884  0.0770380  -8.637 < 2e-16 ***
## siteUKB     -1.1727248  0.0575112 -20.391 < 2e-16 ***
## siteUmU     -0.2438735  0.0889675  -2.741 0.006136 **
## icv         0.4745690  0.0154794  30.658 < 2e-16 ***
## ---
## Signif. codes:  0 '***' 0.001 '**' 0.01 '*' 0.05 '.' 0.1 ' ' 1
##
## Approximate significance of smooth terms:
##           edf Ref.df      F p-value
## s(bl_age)      1.000  1.000 54.739 <2e-16 ***
## s(bl_age):sleep_z 3.531  3.531  1.931  0.0648 .
## s(bl_age):time  2.000  2.000 69.191 <2e-16 ***
## s(sleep_z):time  1.000  1.000  0.002  0.9621
## ---
## Signif. codes:  0 '***' 0.001 '**' 0.01 '*' 0.05 '.' 0.1 ' ' 1
##
## R-sq.(adj) =  0.341
## lmer.REML = 7209.9  Scale est. = 0.017258  n = 8174

```

Below are plots of a plot of  $s(\text{bl\_age})$ ,  $s(\text{bl\_age}):\text{sleep\_z}$ ,  $s(\text{bl\_age}):\text{time}$ , and  $s(\text{sleep\_z}):\text{time}$ . For  $s(\text{sleep\_z}):\text{time}$ , roughly, if we cannot fit a straight line through the confidence bands, there is evidence that the effect of time depends on sleep duration. It is correct that the confidence interval is zero at one point along the axis; this happens because we do not include the main effect.

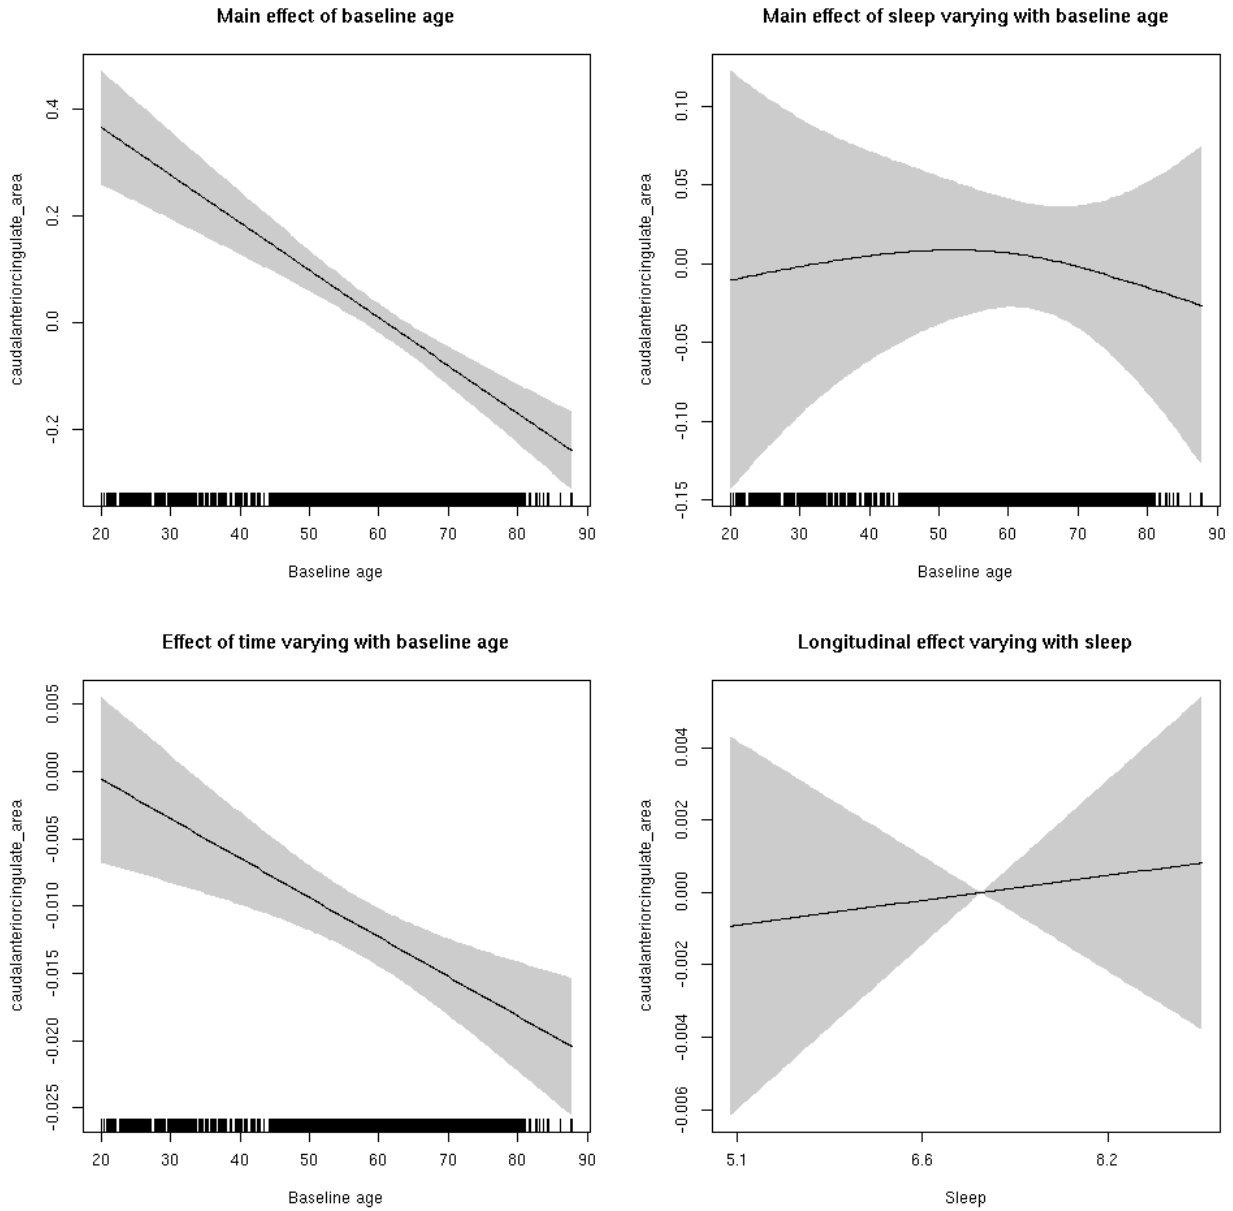

**Restricted to sleep  $\geq 5$  and  $\leq 9$  hours** Below is the row for `s(sleep_z):time` from the model output.

```
## s(sleep_z):time  1.000  1.000  0.126  0.723
```

Below are plots of a plot of `s(bl_age)`, `s(bl_age):sleep_z`, `s(bl_age):time`, and `s(sleep_z):time`. For `s(sleep_z):time`, roughly, if we cannot fit a straight line through the confidence bands, there is evidence that the effect of time depends on sleep duration. It is correct that the confidence interval is zero at one point along the axis; this happens because we do not include the main effect.



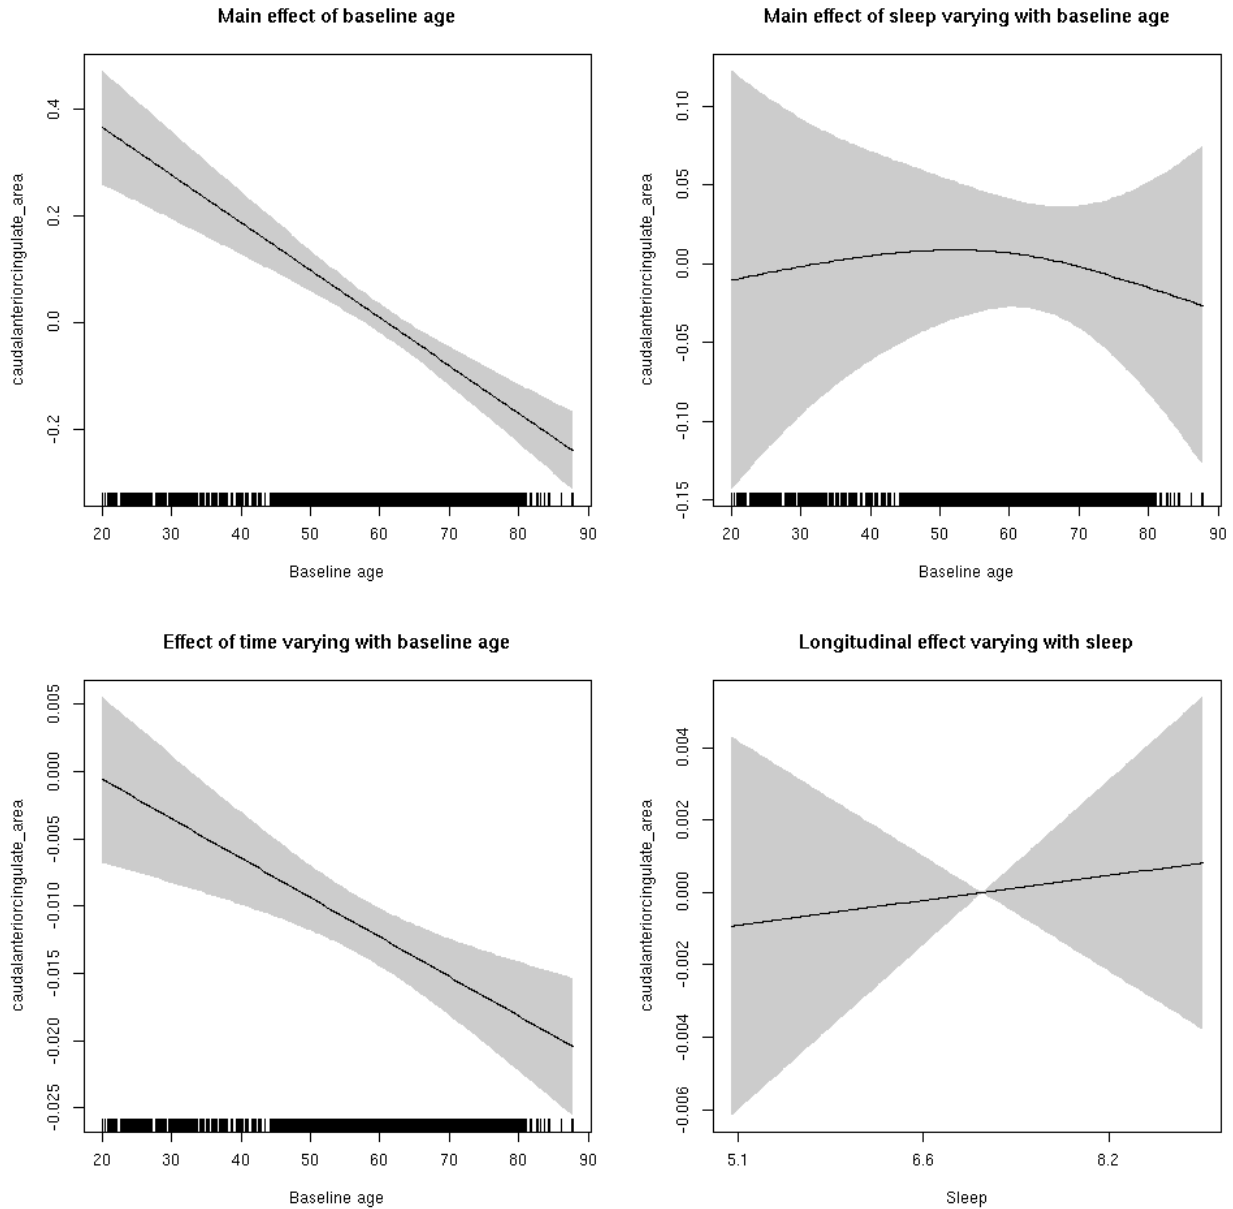

## caudalanteriorcingulate\_thickness: Stratified by sex

**Female: Full data** Below is the row for `s(sleep_z):time` from the model output.

```
## s(sleep_z):time      1      1 0.170  0.6802
```

Below are plots of a plot of `s(bl_age)`, `s(bl_age):sleep_z`, `s(bl_age):time`, and `s(sleep_z):time`. For `s(sleep_z):time`, roughly, if we cannot fit a straight line through the confidence bands, there is evidence that the effect of time depends on sleep duration. It is correct that the confidence interval is zero at one point along the axis; this happens because we do not include the main effect.

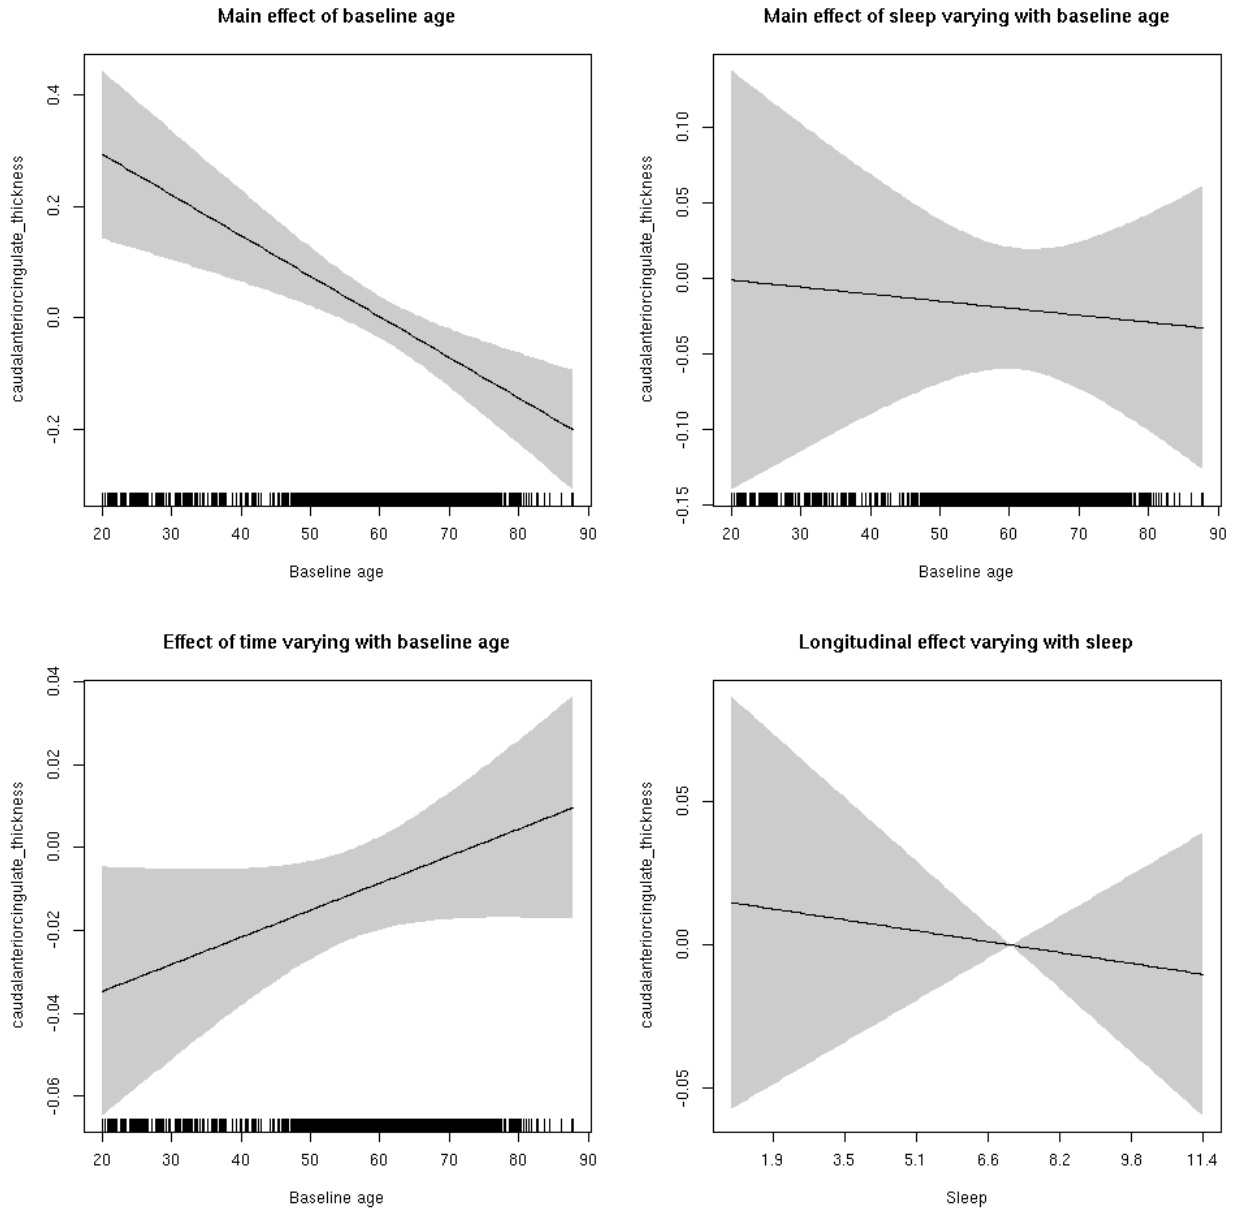

**Male: Full data** Below is the row for `s(sleep_z):time` from the model output.

```
## s(sleep_z):time 1.000 1.000 0.718 0.39690
```

Below are plots of a plot of `s(bl_age)`, `s(bl_age):sleep_z`, `s(bl_age):time`, and `s(sleep_z):time`. For `s(sleep_z):time`, roughly, if we cannot fit a straight line through the confidence bands, there is evidence that the effect of time depends on sleep duration. It is correct that the confidence interval is zero at one point along the axis; this happens because we do not include the main effect.

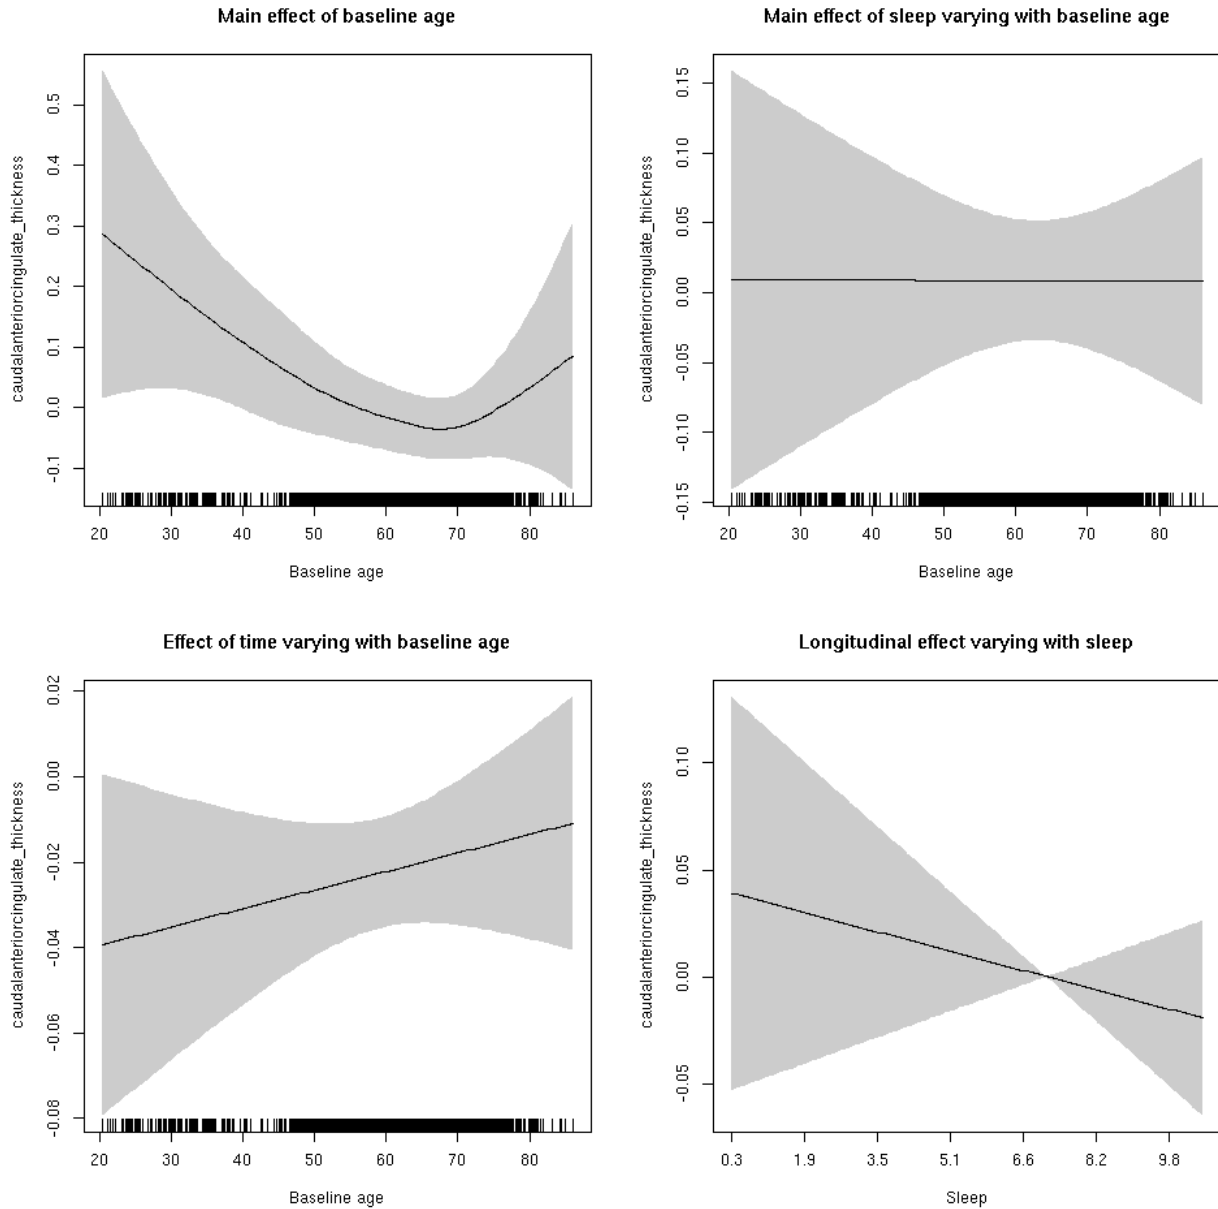

## caudalanteriorcingulate\_thickness

**Full data** Below is the model output. The term `s(sleep_z):time` is probably what we care most about.

```
##
## Family: gaussian
## Link function: identity
##
## Formula:
## value ~ sex + site + s(bl_age, k = 10, bs = "cr") + s(bl_age,
##   by = sleep_z, bs = "cr") + +s(bl_age, by = time, k = 5, bs = "cr") +
##   s(sleep_z, by = time, k = 5, bs = "cr", pc = 0)
## <environment: 0x5630035cd3e8>
```

```

##
## Parametric coefficients:
##           Estimate Std. Error t value Pr(>|t|)
## (Intercept) -0.4472812  0.0536713  -8.334 < 2e-16 ***
## sexmale      -0.1854118  0.0268923  -6.895 5.8e-12 ***
## siteousAvanto -0.0005201  0.0728054  -0.007 0.99430
## siteousPrisma  0.1055644  0.4003444   0.264 0.79203
## siteousSkyra  -0.1795933  0.0727280  -2.469 0.01355 *
## siteUB        0.1412205  0.1404379   1.006 0.31465
## siteUCAM      -0.0451152  0.0735808  -0.613 0.53980
## siteUKB       0.5802802  0.0541641  10.713 < 2e-16 ***
## siteUmU       0.2499192  0.0885369   2.823 0.00477 **
## ---
## Signif. codes:  0 '***' 0.001 '**' 0.01 '*' 0.05 '.' 0.1 ' ' 1
##
## Approximate significance of smooth terms:
##           edf Ref.df    F  p-value
## s(bl_age)      2.908  2.908 7.558 8.12e-05 ***
## s(bl_age):sleep_z 2.000  2.000 0.070 0.932135
## s(bl_age):time  2.000  2.000 9.009 0.000124 ***
## s(sleep_z):time  1.000  1.000 1.058 0.303599
## ---
## Signif. codes:  0 '***' 0.001 '**' 0.01 '*' 0.05 '.' 0.1 ' ' 1
##
## R-sq.(adj) =  0.0871
## lmer.REML = 19472  Scale est. = 0.3017    n = 8178

```

Below are plots of a plot of  $s(\text{bl\_age})$ ,  $s(\text{bl\_age}):\text{sleep\_z}$ ,  $s(\text{bl\_age}):\text{time}$ , and  $s(\text{sleep\_z}):\text{time}$ . For  $s(\text{sleep\_z}):\text{time}$ , roughly, if we cannot fit a straight line through the confidence bands, there is evidence that the effect of time depends on sleep duration. It is correct that the confidence interval is zero at one point along the axis; this happens because we do not include the main effect.

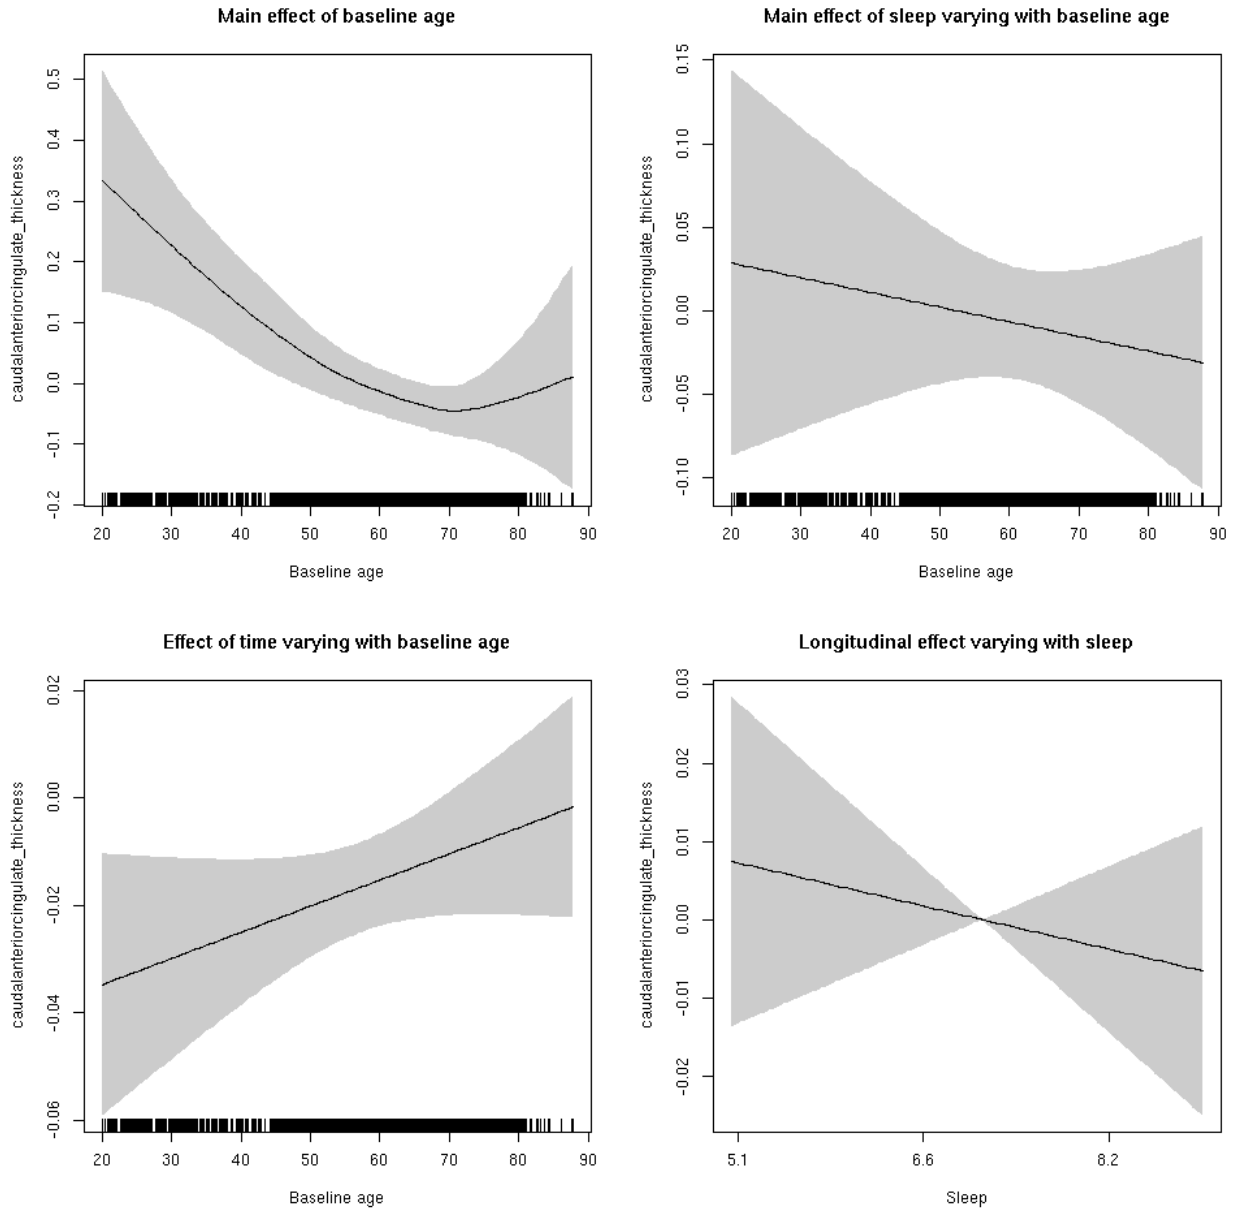

**Restricted to sleep  $\geq 5$  and  $\leq 9$  hours** Below is the row for `s(sleep_z):time` from the model output.

```
## s(sleep_z):time 1.000 1.000 0.502 0.478617
```

Below are plots of a plot of `s(bl_age)`, `s(bl_age):sleep_z`, `s(bl_age):time`, and `s(sleep_z):time`. For `s(sleep_z):time`, roughly, if we cannot fit a straight line through the confidence bands, there is evidence that the effect of time depends on sleep duration. It is correct that the confidence interval is zero at one point along the axis; this happens because we do not include the main effect.



## caudalanteriorcingulate\_volume: Stratified by sex

**Female: Full data** Below is the row for `s(sleep_z):time` from the model output.

```
## s(sleep_z):time  1.000  1.000  0.923  0.337
```

Below are plots of a plot of `s(bl_age)`, `s(bl_age):sleep_z`, `s(bl_age):time`, and `s(sleep_z):time`. For `s(sleep_z):time`, roughly, if we cannot fit a straight line through the confidence bands, there is evidence that the effect of time depends on sleep duration. It is correct that the confidence interval is zero at one point along the axis; this happens because we do not include the main effect.

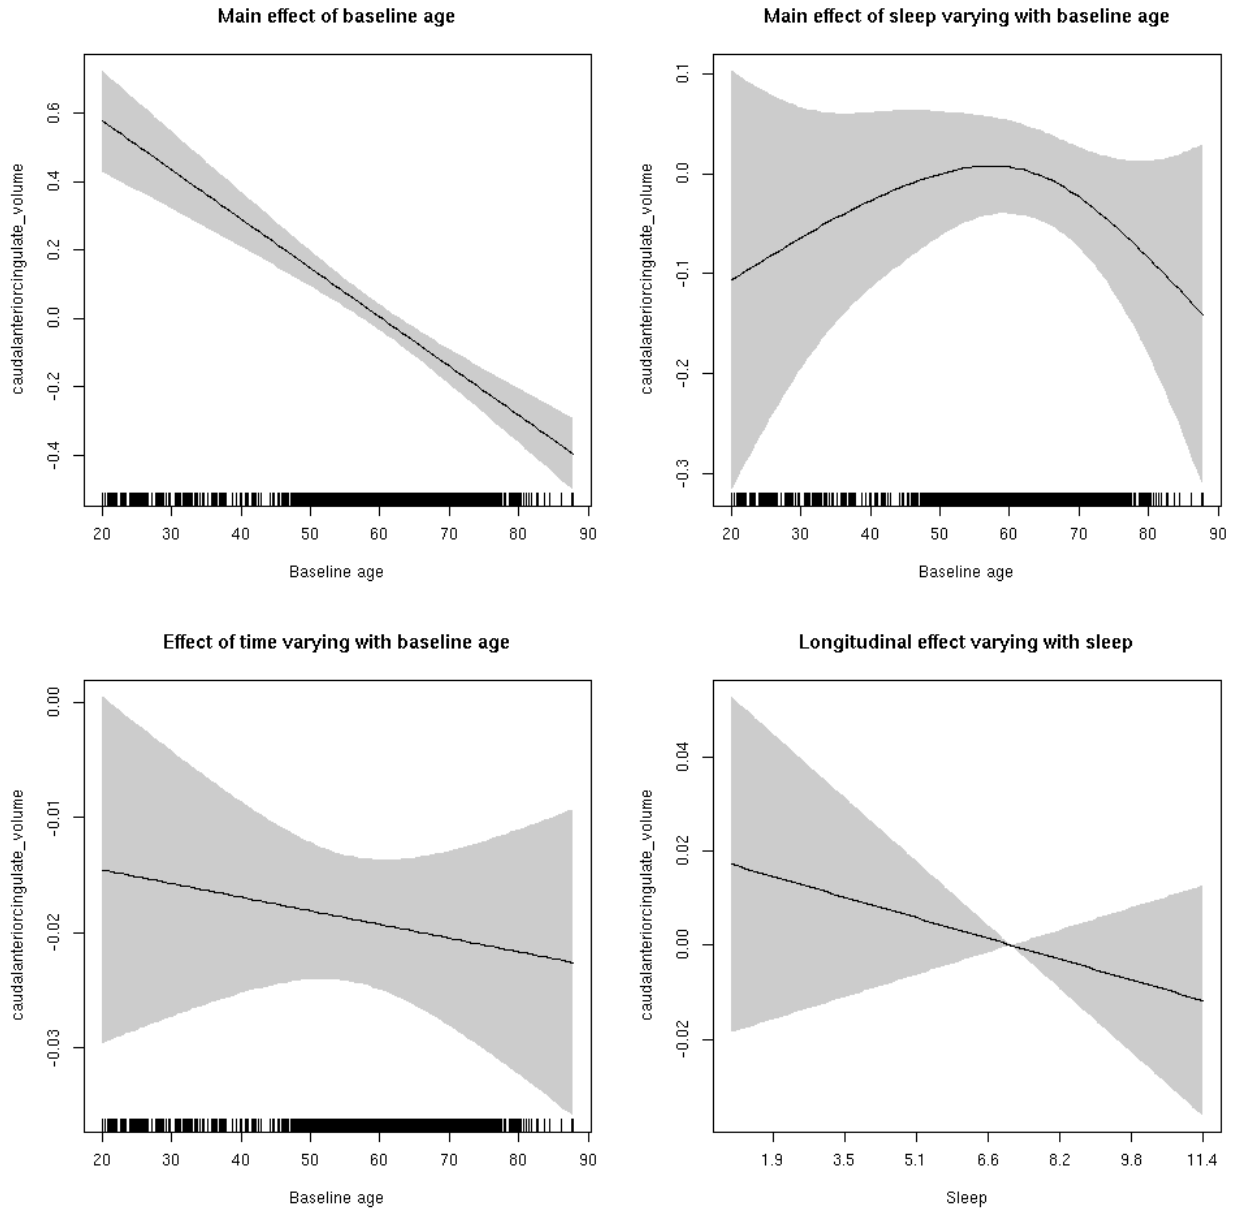

**Male: Full data** Below is the row for `s(sleep_z):time` from the model output.

```
## s(sleep_z):time      1      1 0.479  0.489
```

Below are plots of a plot of `s(bl_age)`, `s(bl_age):sleep_z`, `s(bl_age):time`, and `s(sleep_z):time`. For `s(sleep_z):time`, roughly, if we cannot fit a straight line through the confidence bands, there is evidence that the effect of time depends on sleep duration. It is correct that the confidence interval is zero at one point along the axis; this happens because we do not include the main effect.

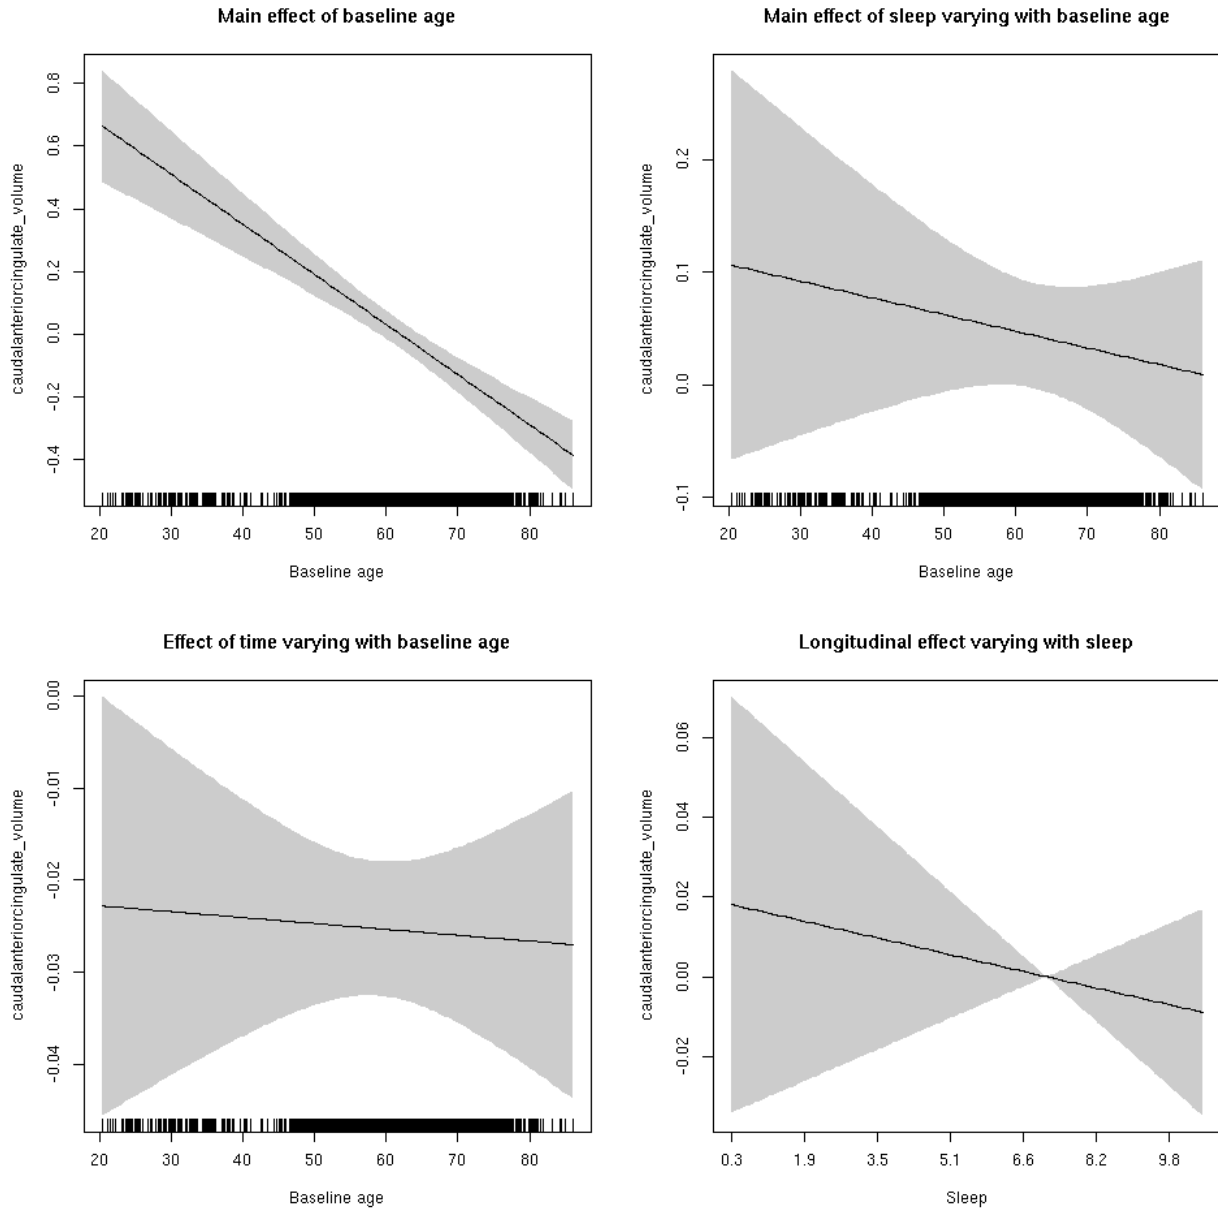

## caudalanteriorcingulate\_volume

**Full data** Below is the model output. The term `s(sleep_z):time` is probably what we care most about.

```
##
## Family: gaussian
## Link function: identity
##
## Formula:
## value ~ sex + site + icv + s(bl_age, k = 10, bs = "cr") + s(bl_age,
##   by = sleep_z, bs = "cr") + +s(bl_age, by = time, k = 5, bs = "cr") +
##   s(sleep_z, by = time, k = 5, bs = "cr", pc = 0)
## <environment: 0x5630035ac220>
```



```

##
## Parametric coefficients:
##           Estimate Std. Error t value Pr(>|t|)
## (Intercept)  0.45945   0.06733   6.824 9.50e-12 ***
## sexmale      -0.08921   0.03497  -2.551  0.0108 *
## siteousAvanto -0.44675   0.08334  -5.360 8.54e-08 ***
## siteousPrisma -0.01241   0.23287  -0.053  0.9575
## siteousSkyra  -0.37951   0.08058  -4.710 2.52e-06 ***
## siteUB       -0.29711   0.15593  -1.905  0.0568 .
## siteUCAM     -0.42192   0.08375  -5.038 4.81e-07 ***
## siteUKB      -0.39853   0.06268  -6.358 2.15e-10 ***
## siteUmU      -0.04823   0.09653  -0.500  0.6174
## icv          0.33394   0.01726  19.346 < 2e-16 ***
## ---
## Signif. codes:  0 '***' 0.001 '**' 0.01 '*' 0.05 '.' 0.1 ' ' 1
##
## Approximate significance of smooth terms:
##           edf Ref.df      F p-value
## s(bl_age)      1     1 123.677 <2e-16 ***
## s(bl_age):sleep_z  3     3   1.328  0.260
## s(bl_age):time    2     2  47.425 <2e-16 ***
## s(sleep_z):time   1     1   1.396  0.237
## ---
## Signif. codes:  0 '***' 0.001 '**' 0.01 '*' 0.05 '.' 0.1 ' ' 1
##
## R-sq.(adj) =  0.14
## lmer.REML = 14443 Scale est. = 0.081116 n = 8176

```

Below are plots of a plot of  $s(\text{bl\_age})$ ,  $s(\text{bl\_age}):\text{sleep\_z}$ ,  $s(\text{bl\_age}):\text{time}$ , and  $s(\text{sleep\_z}):\text{time}$ . For  $s(\text{sleep\_z}):\text{time}$ , roughly, if we cannot fit a straight line through the confidence bands, there is evidence that the effect of time depends on sleep duration. It is correct that the confidence interval is zero at one point along the axis; this happens because we do not include the main effect.

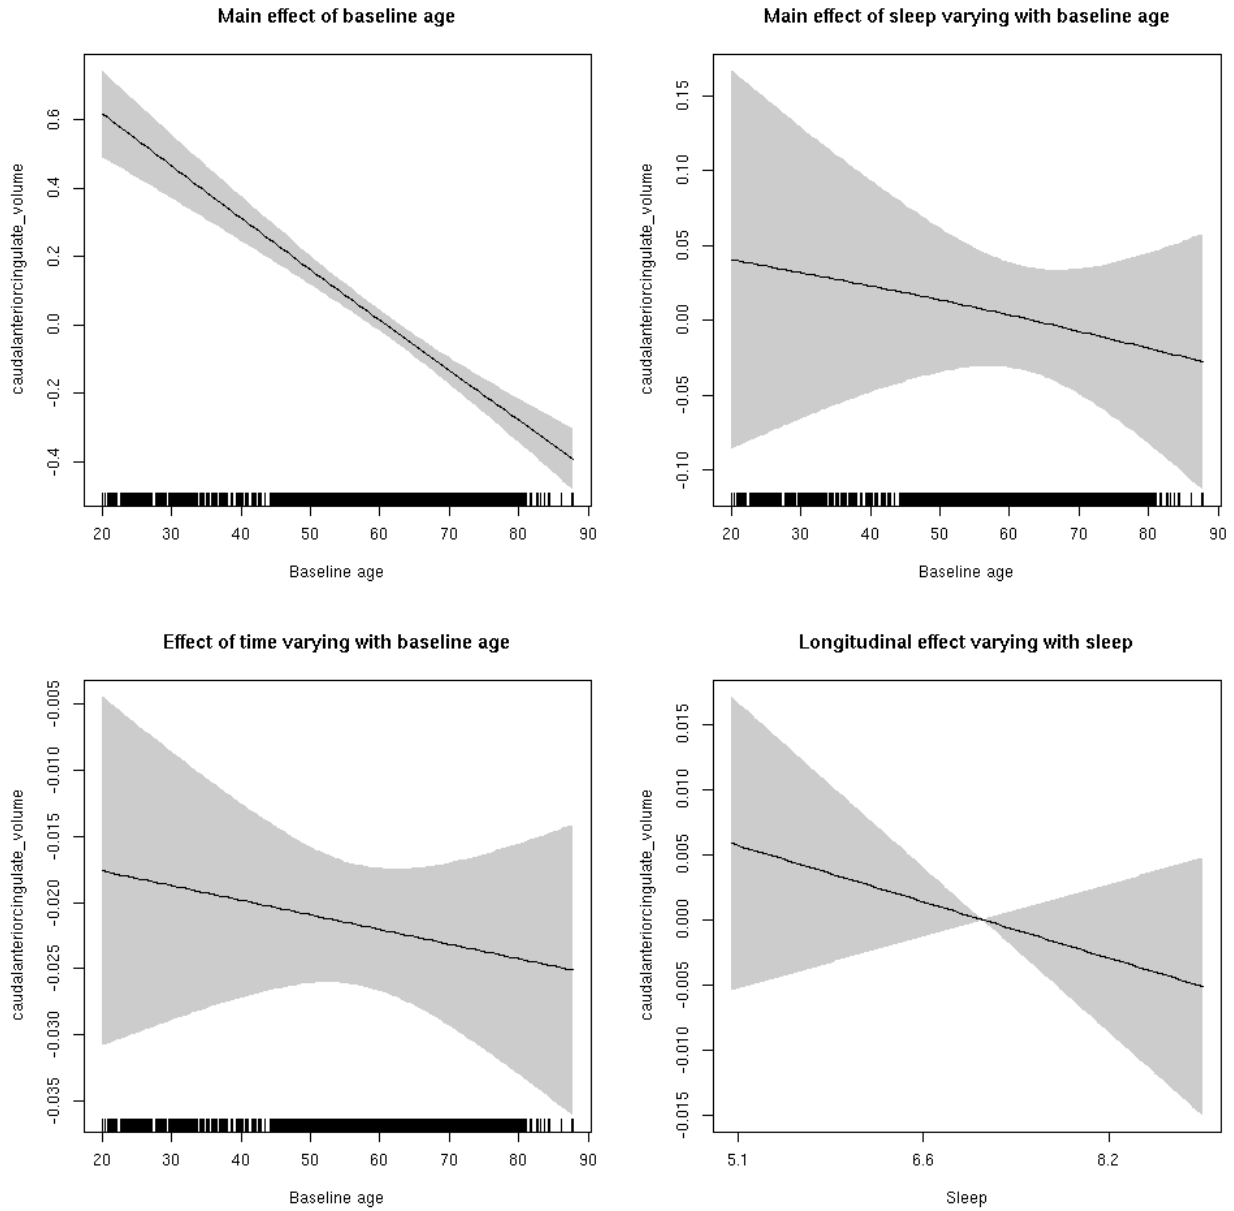

**Restricted to sleep  $\geq 5$  and  $\leq 9$  hours** Below is the row for `s(sleep_z):time` from the model output.

```
## s(sleep_z):time  1.000  1.000  1.075  0.300
```

Below are plots of a plot of `s(bl_age)`, `s(bl_age):sleep_z`, `s(bl_age):time`, and `s(sleep_z):time`. For `s(sleep_z):time`, roughly, if we cannot fit a straight line through the confidence bands, there is evidence that the effect of time depends on sleep duration. It is correct that the confidence interval is zero at one point along the axis; this happens because we do not include the main effect.

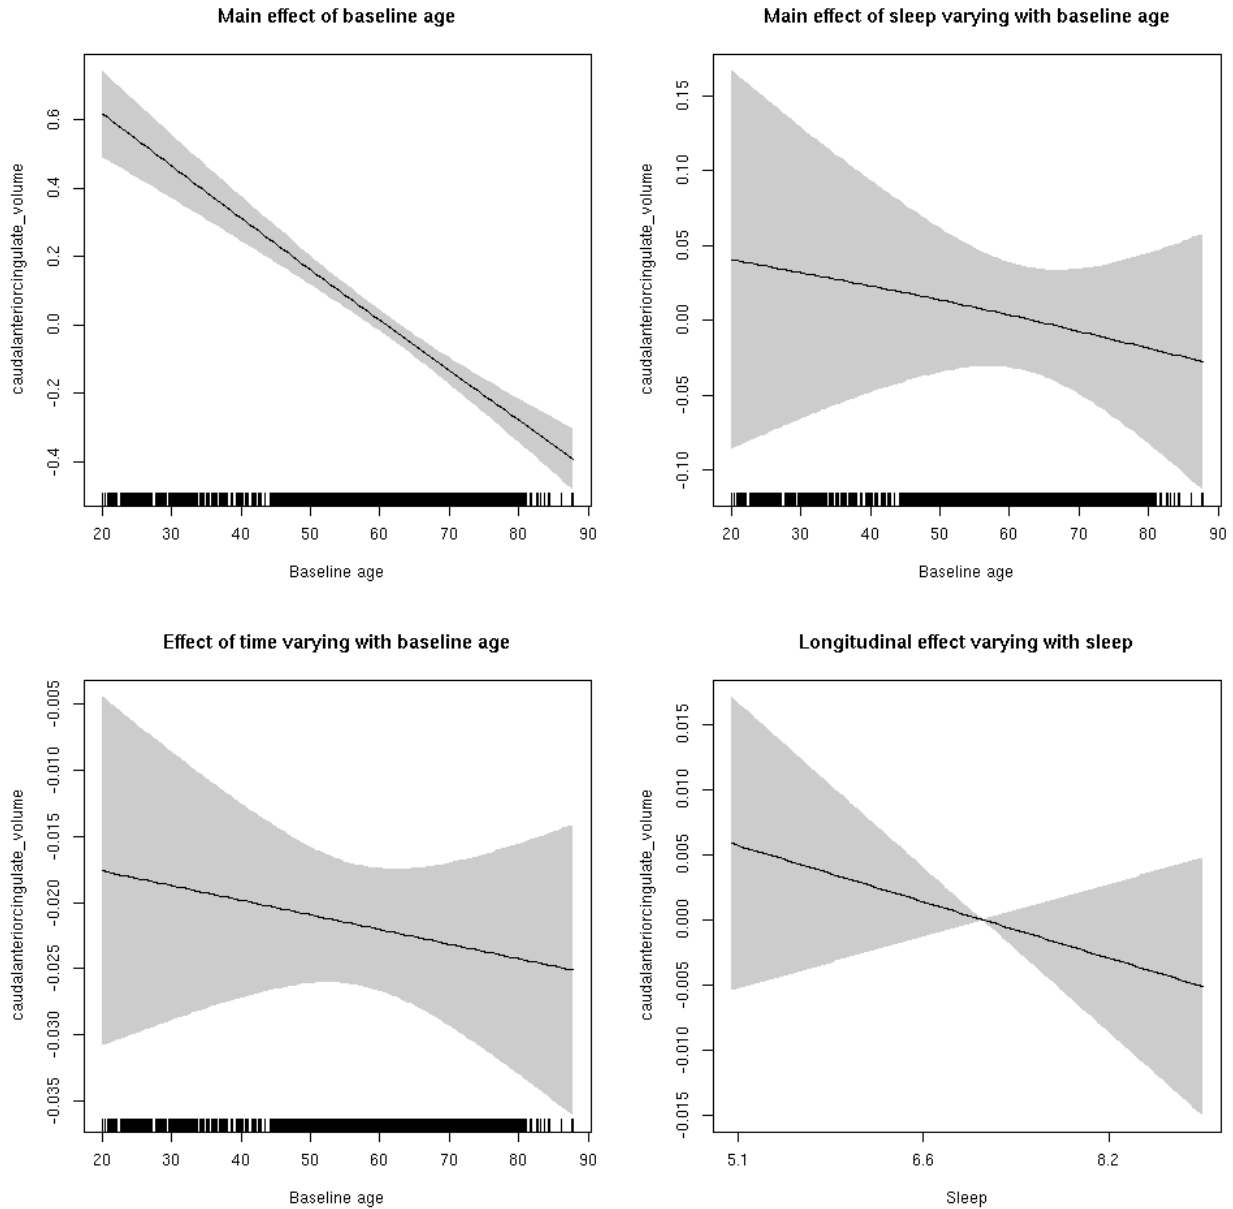

## caudalmiddlefrontal\_area: Stratified by sex

**Female: Full data** Below is the row for `s(sleep_z):time` from the model output.

```
## s(sleep_z):time  1.000  1.000  0.803  0.370
```

Below are plots of a plot of `s(bl_age)`, `s(bl_age):sleep_z`, `s(bl_age):time`, and `s(sleep_z):time`. For `s(sleep_z):time`, roughly, if we cannot fit a straight line through the confidence bands, there is evidence that the effect of time depends on sleep duration. It is correct that the confidence interval is zero at one point along the axis; this happens because we do not include the main effect.

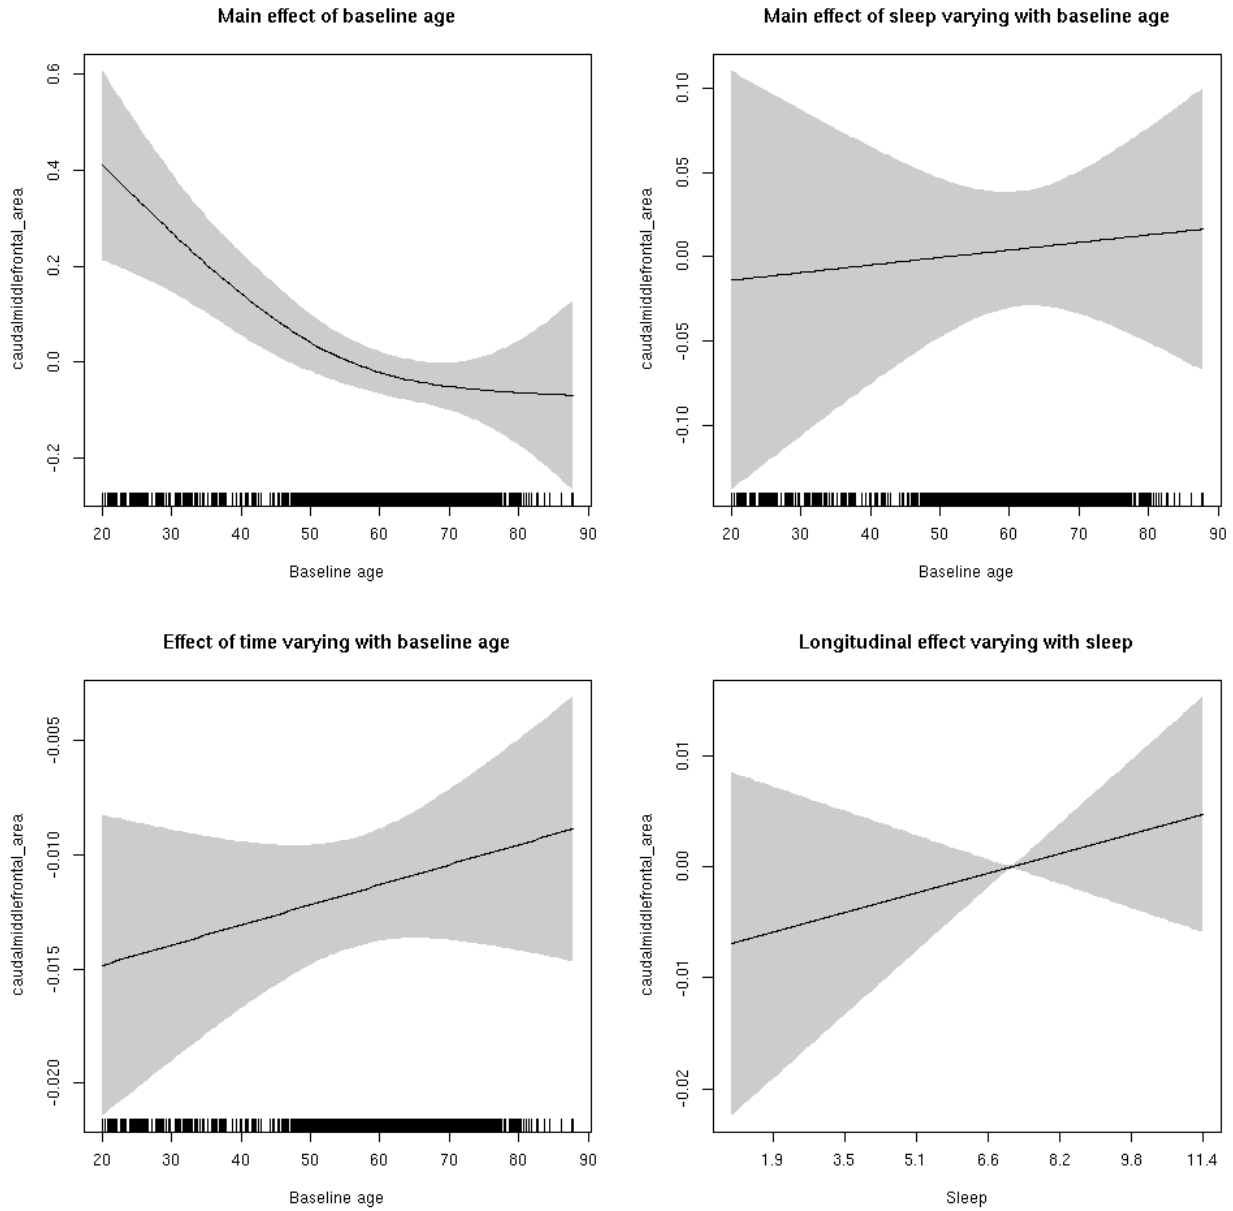

**Male: Full data** Below is the row for `s(sleep_z):time` from the model output.

```
## s(sleep_z):time  1.000  1.000  0.177  0.674
```

Below are plots of a plot of `s(bl_age)`, `s(bl_age):sleep_z`, `s(bl_age):time`, and `s(sleep_z):time`. For `s(sleep_z):time`, roughly, if we cannot fit a straight line through the confidence bands, there is evidence that the effect of time depends on sleep duration. It is correct that the confidence interval is zero at one point along the axis; this happens because we do not include the main effect.

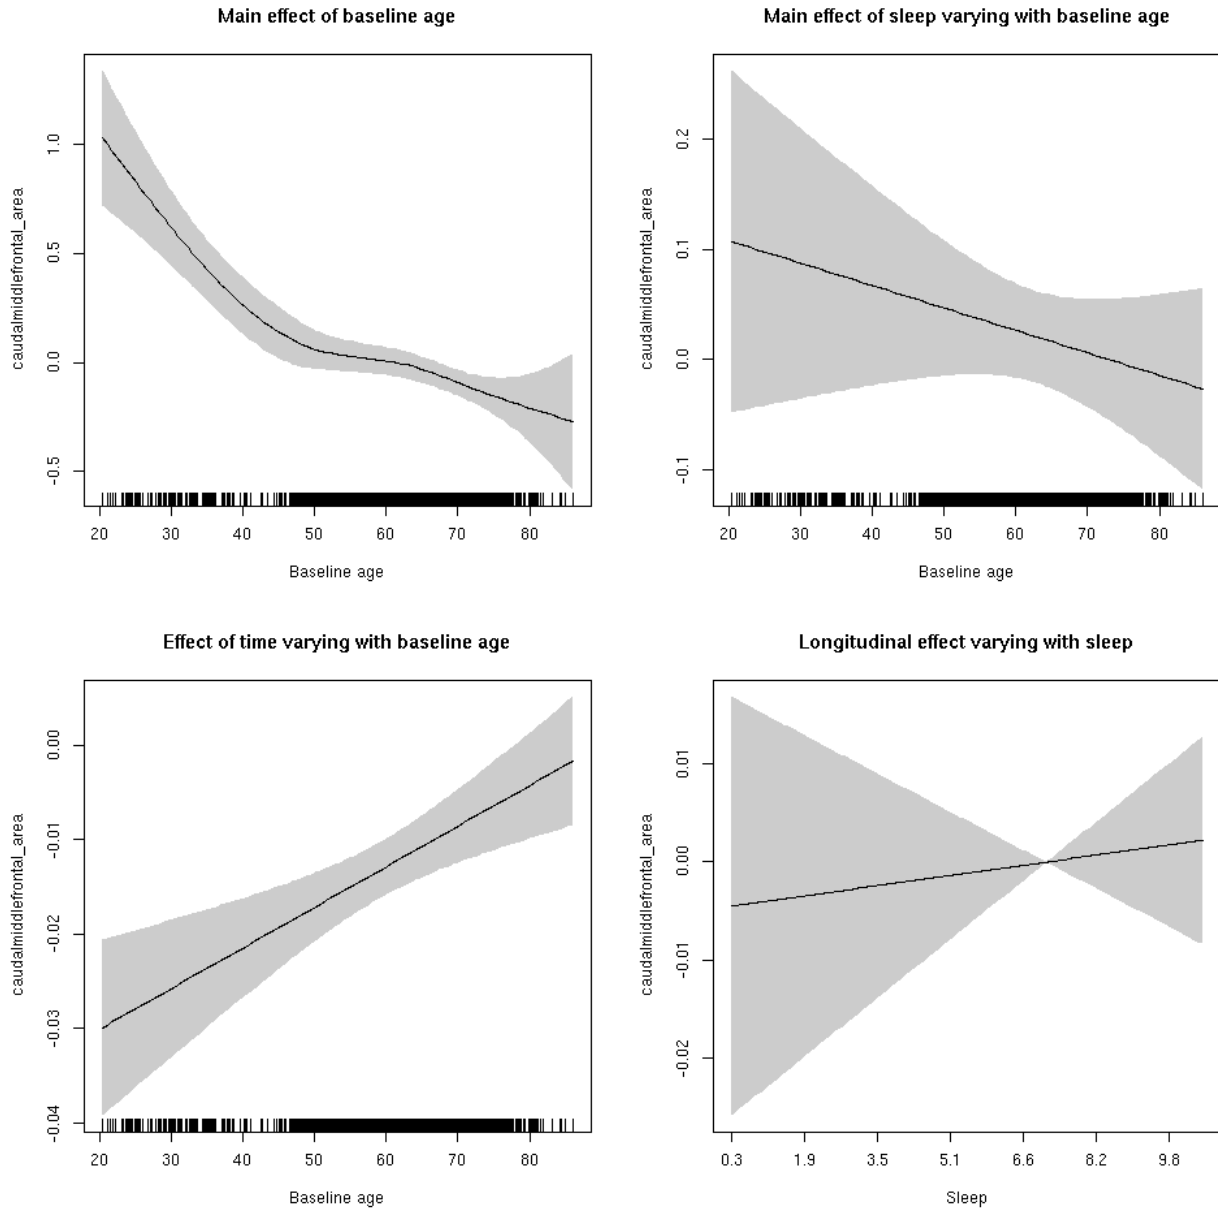

## caudalmiddlefrontal\_area

**Full data** Below is the model output. The term `s(sleep_z):time` is probably what we care most about.

```
##
## Family: gaussian
## Link function: identity
##
## Formula:
## value ~ sex + site + icv + s(bl_age, k = 10, bs = "cr") + s(bl_age,
##   by = sleep_z, bs = "cr") + +s(bl_age, by = time, k = 5, bs = "cr") +
##   s(sleep_z, by = time, k = 5, bs = "cr", pc = 0)
## <environment: 0x5630035a74b8>
```

```

##
## Parametric coefficients:
##           Estimate Std. Error t value Pr(>|t|)
## (Intercept)  0.75296   0.06074  12.397 < 2e-16 ***
## sexmale      0.03083   0.03125   0.987  0.3239
## siteousAvanto -0.68258  0.07393  -9.232 < 2e-16 ***
## siteousPrisma -0.72860  0.11929  -6.108 1.05e-09 ***
## siteousSkyra  -0.67918  0.07171  -9.472 < 2e-16 ***
## siteUB       -0.76536  0.14116  -5.422 6.06e-08 ***
## siteUCAM     -0.68013  0.07560  -8.996 < 2e-16 ***
## siteUKB      -0.74763  0.05777 -12.941 < 2e-16 ***
## siteUmU      -0.17579  0.08719  -2.016  0.0438 *
## icv          0.57455  0.01509  38.063 < 2e-16 ***
## ---
## Signif. codes:  0 '***' 0.001 '**' 0.01 '*' 0.05 '.' 0.1 ' ' 1
##
## Approximate significance of smooth terms:
##           edf Ref.df    F p-value
## s(bl_age)      2.854  2.854 26.561 <2e-16 ***
## s(bl_age):sleep_z 2.000  2.000  0.525  0.591
## s(bl_age):time  2.000  2.000 90.682 <2e-16 ***
## s(sleep_z):time  1.000  1.000  1.124  0.289
## ---
## Signif. codes:  0 '***' 0.001 '**' 0.01 '*' 0.05 '.' 0.1 ' ' 1
##
## R-sq.(adj) =  0.368
## lmer.REML = 6106.7  Scale est. = 0.01403  n = 8140

```

Below are plots of a plot of  $s(\text{bl\_age})$ ,  $s(\text{bl\_age}):\text{sleep\_z}$ ,  $s(\text{bl\_age}):\text{time}$ , and  $s(\text{sleep\_z}):\text{time}$ . For  $s(\text{sleep\_z}):\text{time}$ , roughly, if we cannot fit a straight line through the confidence bands, there is evidence that the effect of time depends on sleep duration. It is correct the that confidence interval is zero at one point along the axis; this happens because we do not include the main effect.

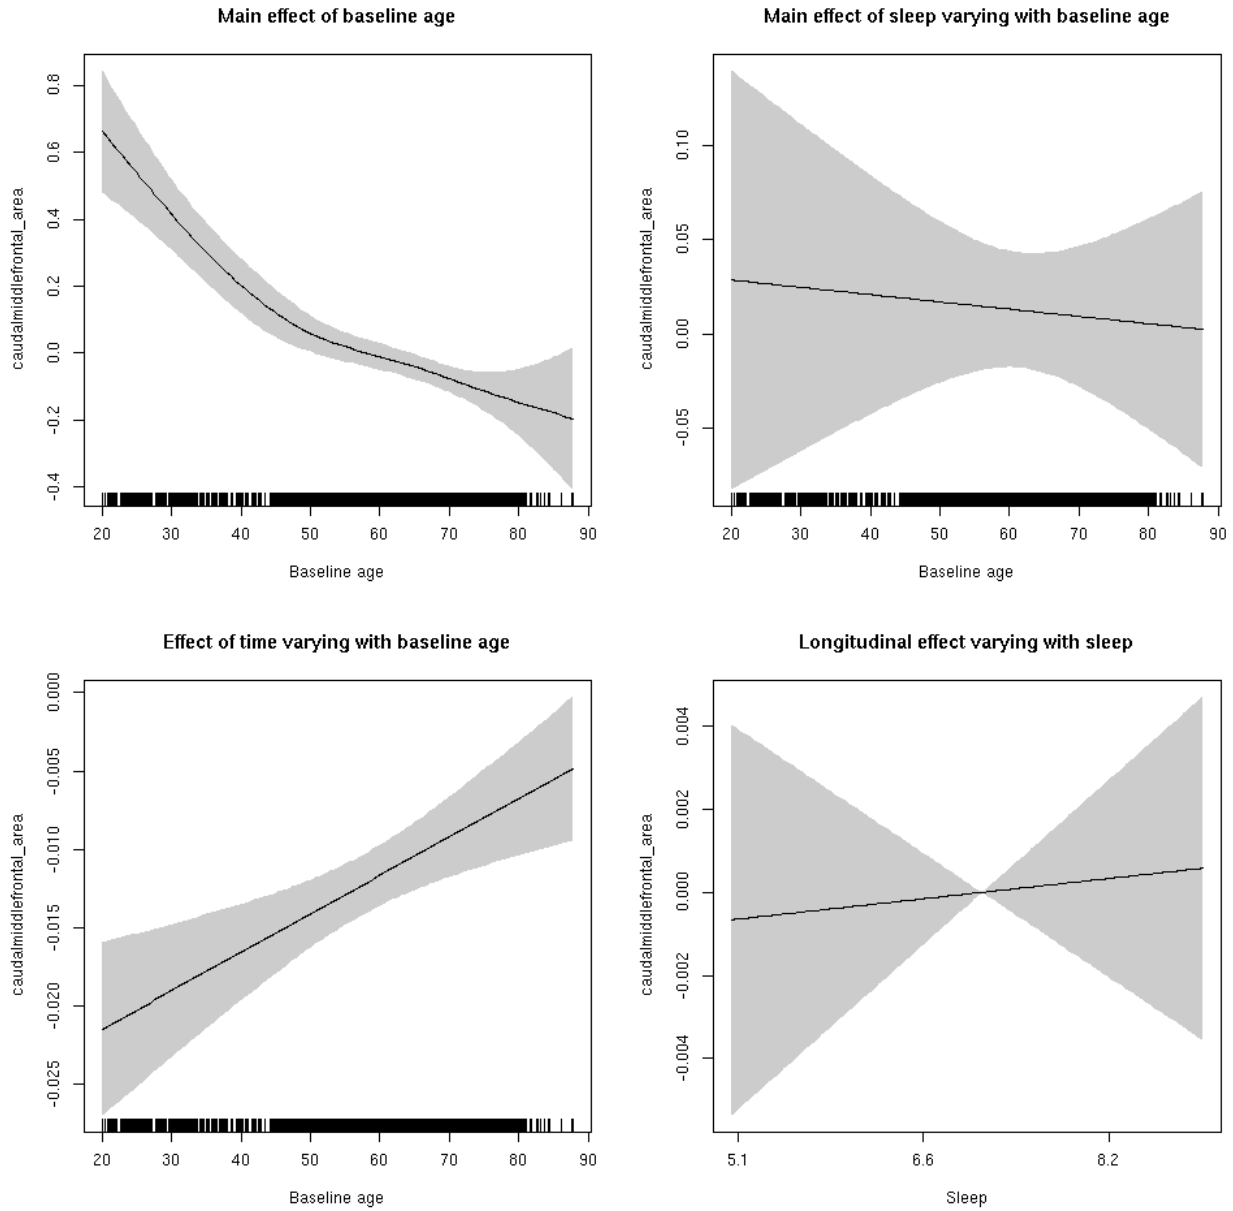

**Restricted to sleep  $\geq 5$  and  $\leq 9$  hours** Below is the row for `s(sleep_z):time` from the model output.

```
## s(sleep_z):time  1.000  1.000  0.079  0.779
```

Below are plots of a plot of `s(bl_age)`, `s(bl_age):sleep_z`, `s(bl_age):time`, and `s(sleep_z):time`. For `s(sleep_z):time`, roughly, if we cannot fit a straight line through the confidence bands, there is evidence that the effect of time depends on sleep duration. It is correct that the confidence interval is zero at one point along the axis; this happens because we do not include the main effect.

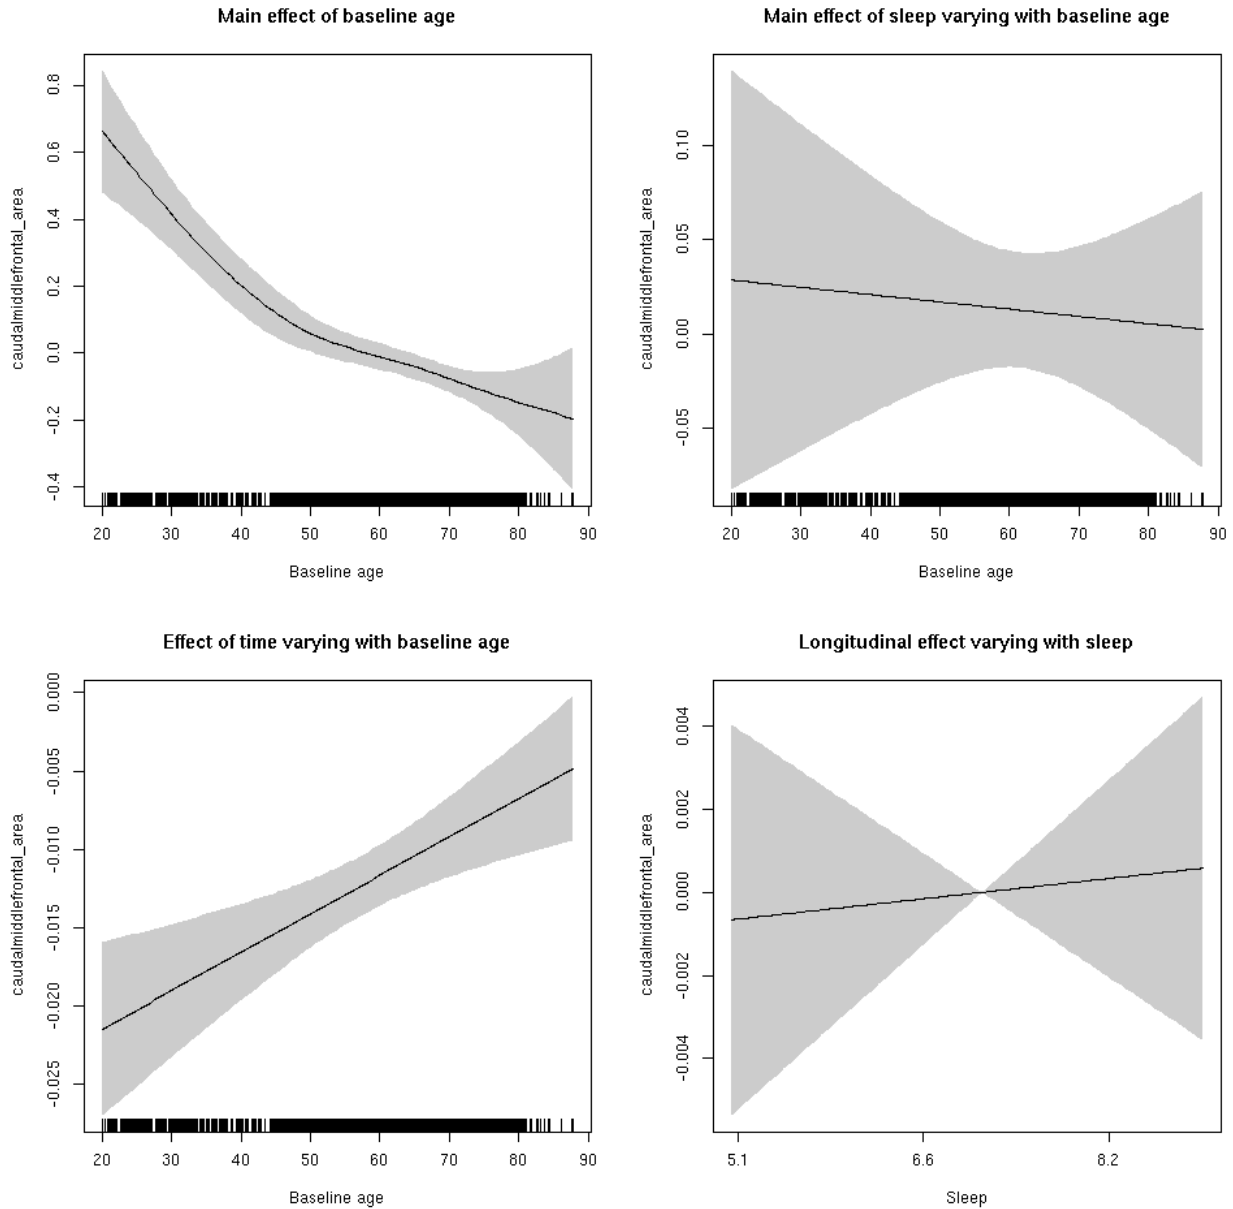

### caudalmiddlefrontal\_thickness: Stratified by sex

**Female: Full data** Below is the row for `s(sleep_z):time` from the model output.

```
## s(sleep_z):time  1.000  1.000  0.000  0.996
```

Below are plots of a plot of `s(bl_age)`, `s(bl_age):sleep_z`, `s(bl_age):time`, and `s(sleep_z):time`. For `s(sleep_z):time`, roughly, if we cannot fit a straight line through the confidence bands, there is evidence that the effect of time depends on sleep duration. It is correct that the confidence interval is zero at one point along the axis; this happens because we do not include the main effect.



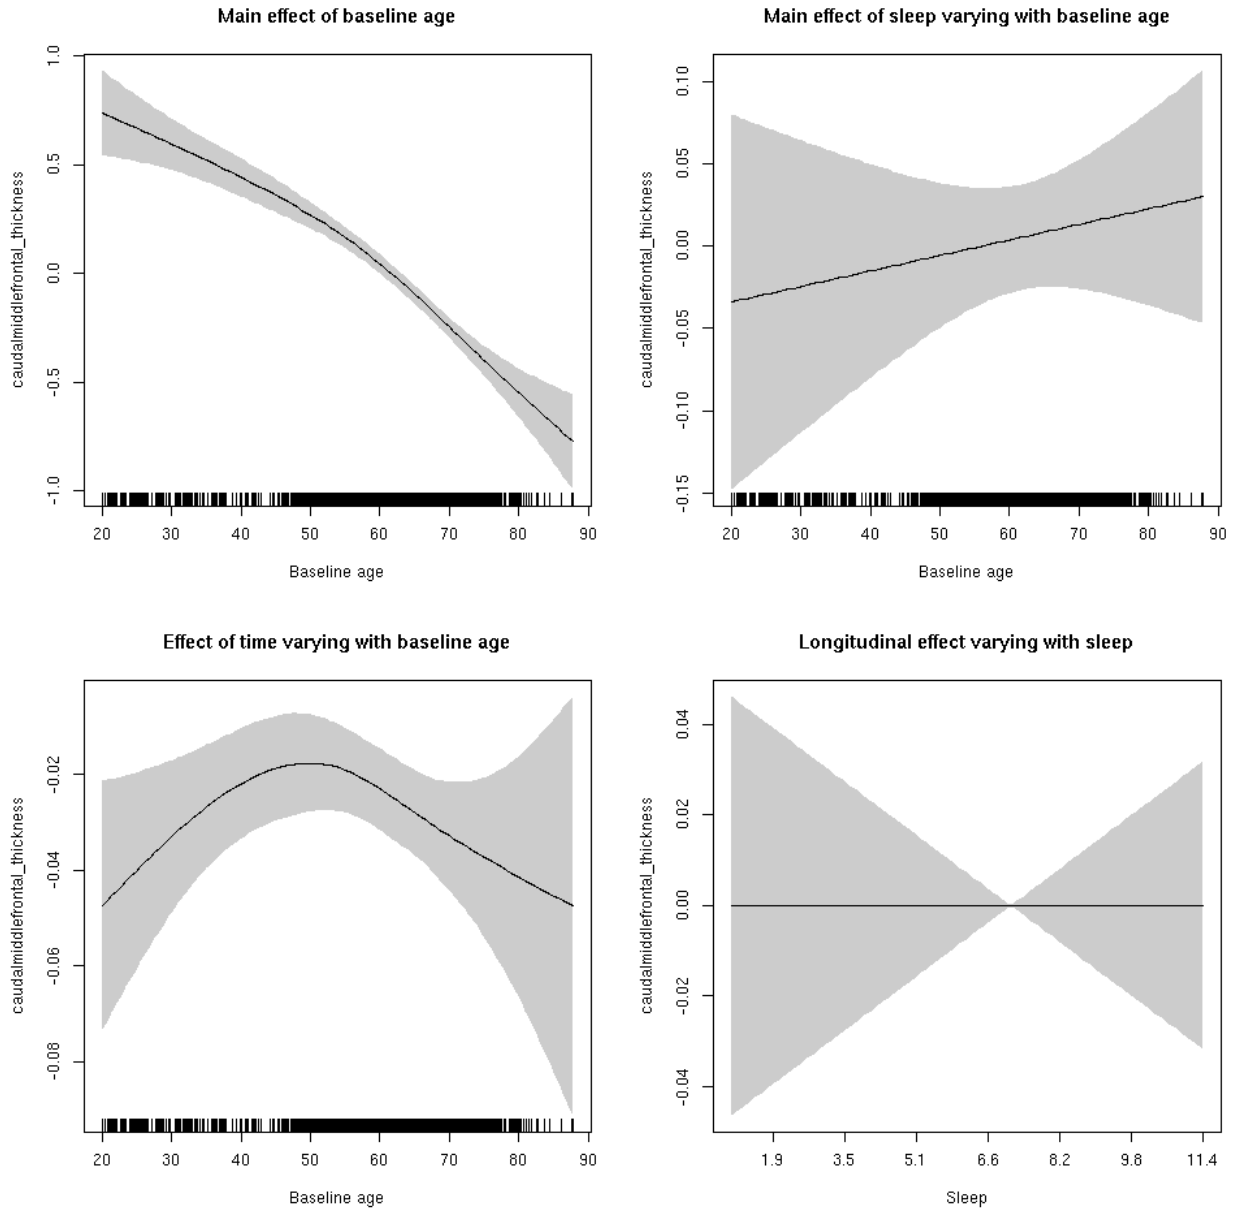

**Male: Full data** Below is the row for `s(sleep_z):time` from the model output.

```
## s(sleep_z):time  1.000  1.000  0.026  0.871
```

Below are plots of a plot of `s(bl_age)`, `s(bl_age):sleep_z`, `s(bl_age):time`, and `s(sleep_z):time`. For `s(sleep_z):time`, roughly, if we cannot fit a straight line through the confidence bands, there is evidence that the effect of time depends on sleep duration. It is correct that the confidence interval is zero at one point along the axis; this happens because we do not include the main effect.

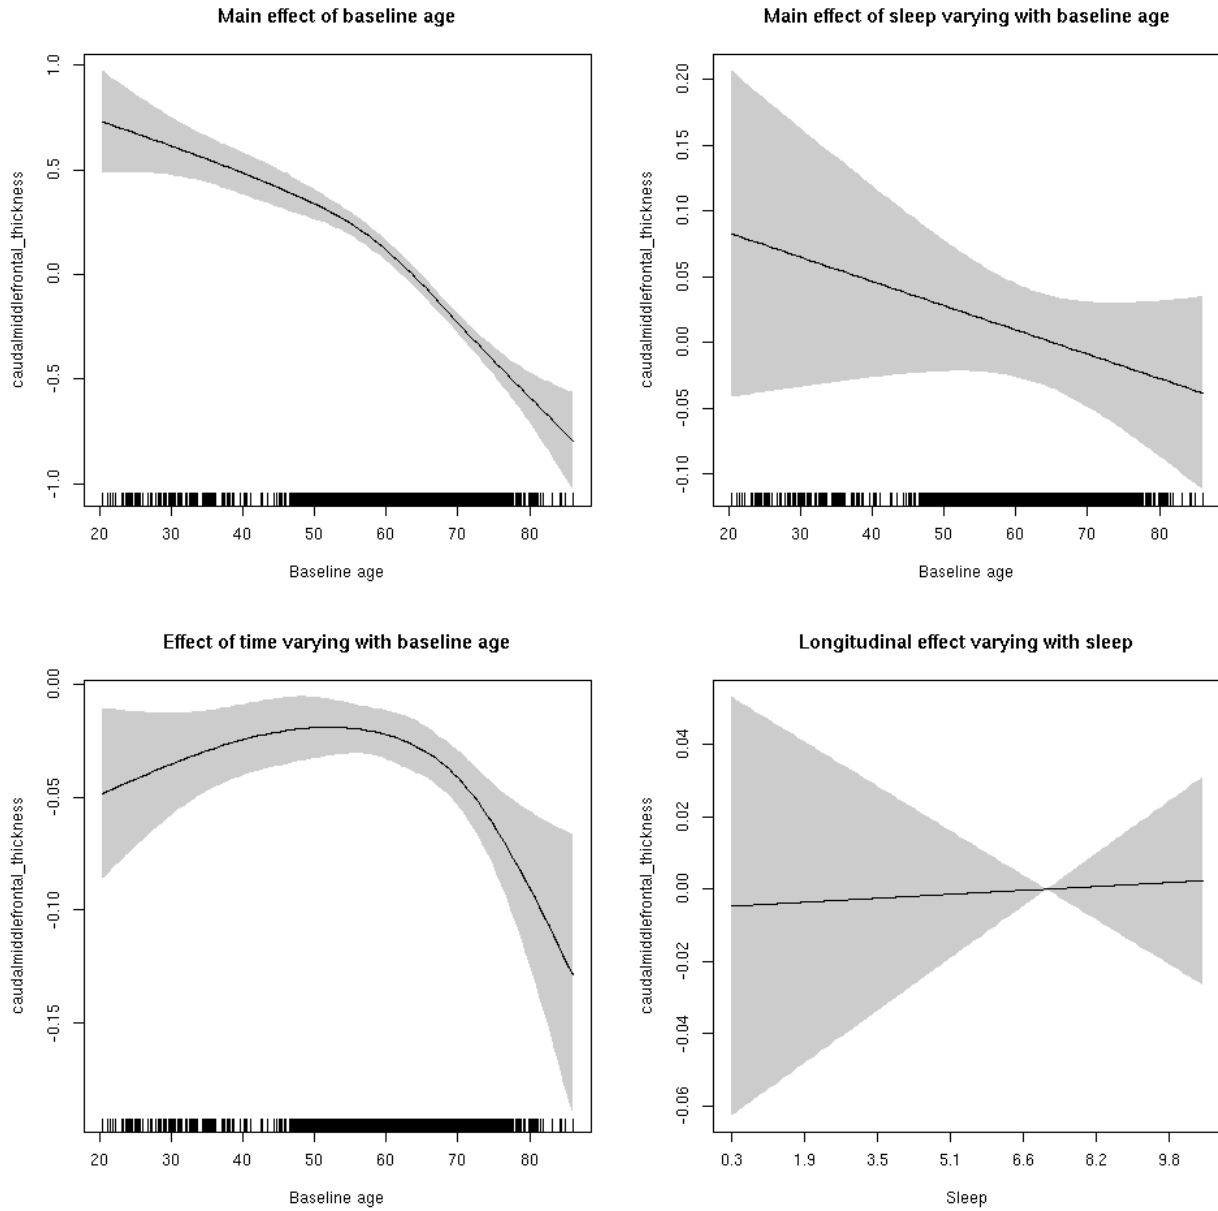

## caudalmiddlefrontal\_thickness

**Full data** Below is the model output. The term `s(sleep_z):time` is probably what we care most about.

```
##
## Family: gaussian
## Link function: identity
##
## Formula:
## value ~ sex + site + s(bl_age, k = 10, bs = "cr") + s(bl_age,
##   by = sleep_z, bs = "cr") + +s(bl_age, by = time, k = 5, bs = "cr") +
##   s(sleep_z, by = time, k = 5, bs = "cr", pc = 0)
## <environment: 0x5630035d1260>
```

```

##
## Parametric coefficients:
##           Estimate Std. Error t value Pr(>|t|)
## (Intercept) -1.45063    0.04417 -32.841 < 2e-16 ***
## sexmale     -0.05862    0.02215  -2.647 0.008133 **
## siteousAvanto -0.08041    0.05881  -1.367 0.171616
## siteousPrisma  0.37413    0.25805   1.450 0.147132
## siteousSkyra  -0.77597    0.05879 -13.198 < 2e-16 ***
## siteUB       0.35092    0.11709   2.997 0.002735 **
## siteUCAM     0.20981    0.06074   3.454 0.000555 ***
## siteUKB      1.80423    0.04475  40.321 < 2e-16 ***
## siteUmU     -0.19011    0.07282  -2.611 0.009051 **
## ---
## Signif. codes:  0 '***' 0.001 '**' 0.01 '*' 0.05 '.' 0.1 ' ' 1
##
## Approximate significance of smooth terms:
##           edf Ref.df      F p-value
## s(bl_age)      3.508  3.508 162.148 <2e-16 ***
## s(bl_age):sleep_z 2.000  2.000   0.166  0.847
## s(bl_age):time  3.474  3.474  27.980 <2e-16 ***
## s(sleep_z):time  2.741  2.741   1.037  0.352
## ---
## Signif. codes:  0 '***' 0.001 '**' 0.01 '*' 0.05 '.' 0.1 ' ' 1
##
## R-sq.(adj) =  0.623
## lmer.REML = 13842  Scale est. = 0.11531  n = 8171

```

Below are plots of a plot of `s(bl_age)`, `s(bl_age):sleep_z`, `s(bl_age):time`, and `s(sleep_z):time`. For `s(sleep_z):time`, roughly, if we cannot fit a straight line through the confidence bands, there is evidence that the effect of time depends on sleep duration. It is correct that the confidence interval is zero at one point along the axis; this happens because we do not include the main effect.

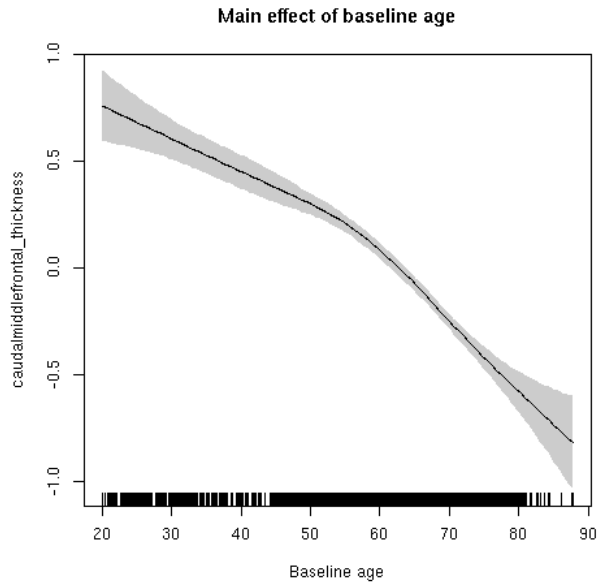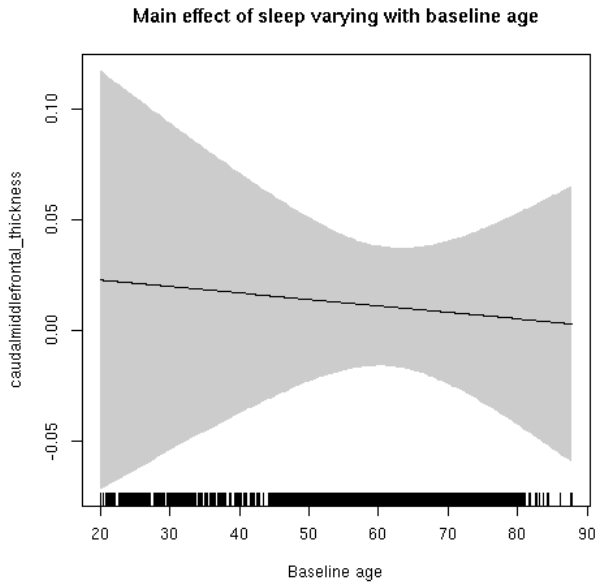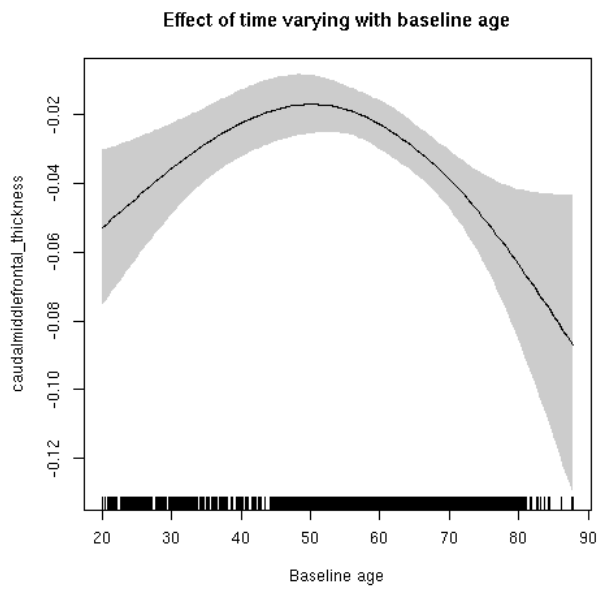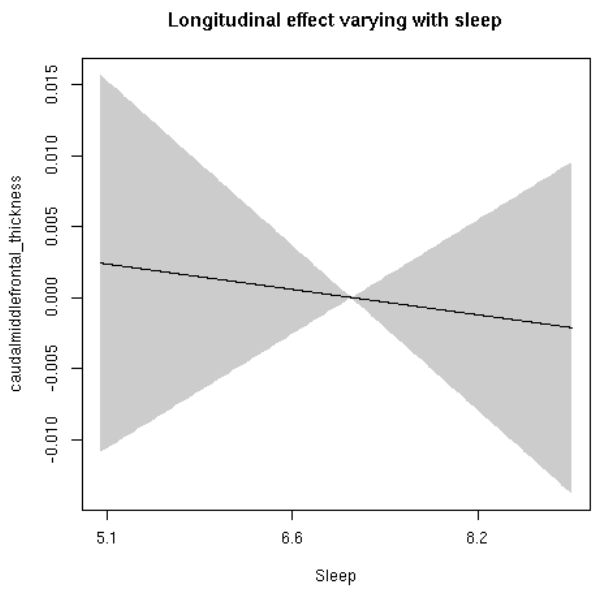

**Restricted to sleep  $\geq 5$  and  $\leq 9$  hours** Below is the row for `s(sleep_z):time` from the model output.

```
## s(sleep_z):time 1.000 1.000 0.132 0.716
```

Below are plots of a plot of `s(bl_age)`, `s(bl_age):sleep_z`, `s(bl_age):time`, and `s(sleep_z):time`. For `s(sleep_z):time`, roughly, if we cannot fit a straight line through the confidence bands, there is evidence that the effect of time depends on sleep duration. It is correct that the confidence interval is zero at one point along the axis; this happens because we do not include the main effect.

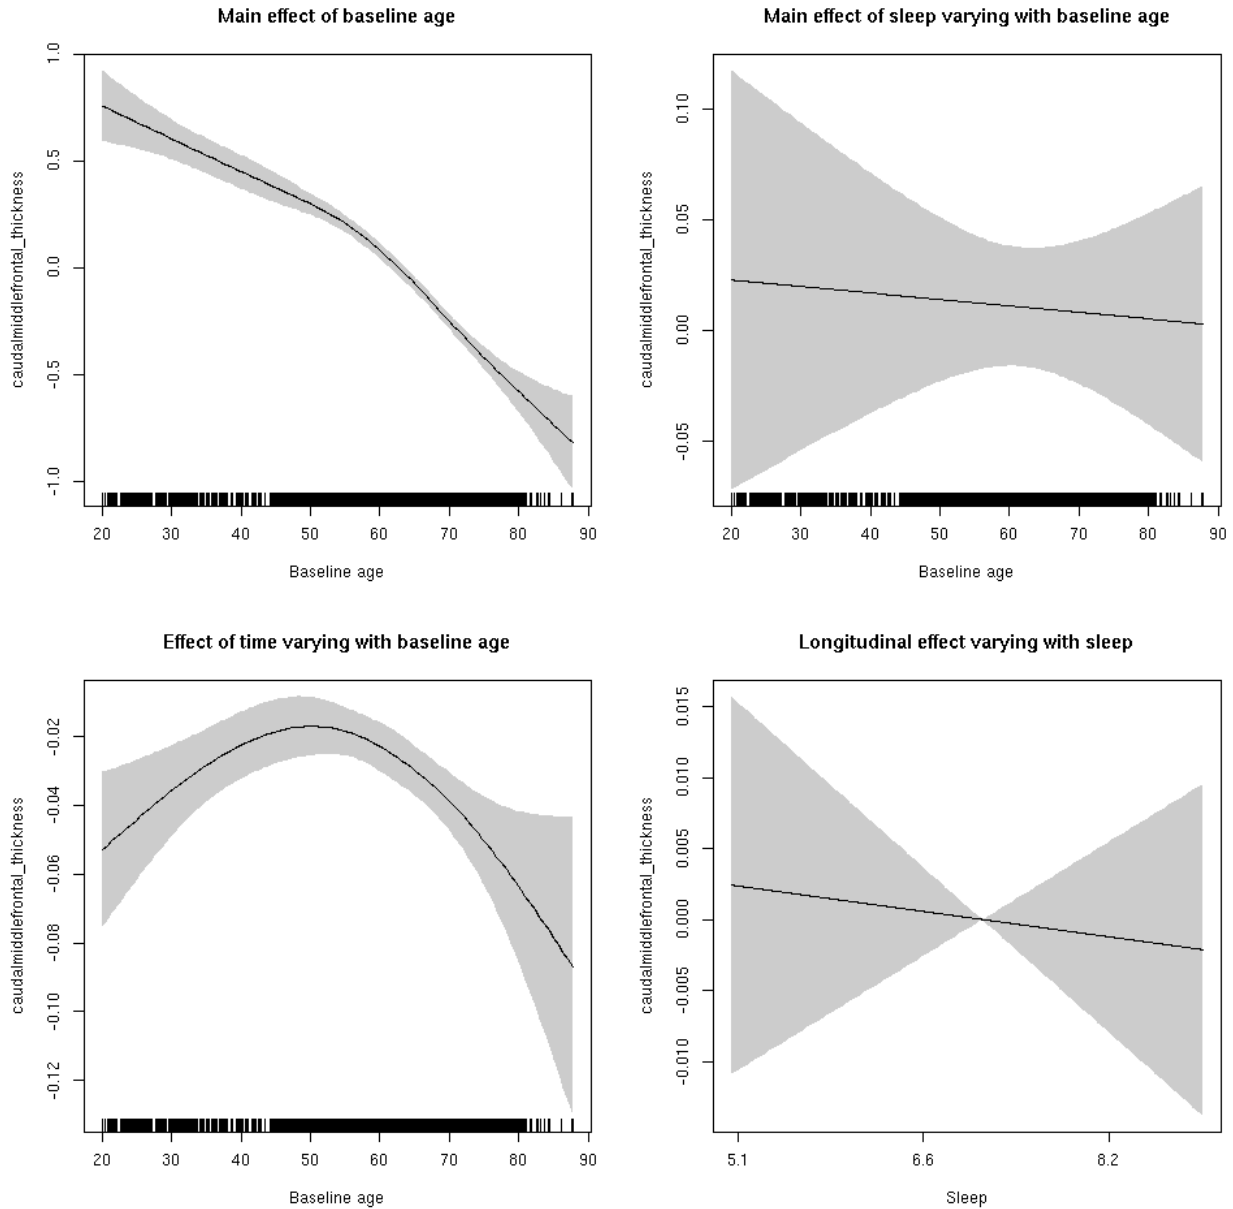

### caudalmiddlefrontal\_volume: Stratified by sex

**Female: Full data** Below is the row for `s(sleep_z):time` from the model output.

```
## s(sleep_z):time  1.000  1.000  0.015  0.903
```

Below are plots of a plot of `s(bl_age)`, `s(bl_age):sleep_z`, `s(bl_age):time`, and `s(sleep_z):time`. For `s(sleep_z):time`, roughly, if we cannot fit a straight line through the confidence bands, there is evidence that the effect of time depends on sleep duration. It is correct that the confidence interval is zero at one point along the axis; this happens because we do not include the main effect.

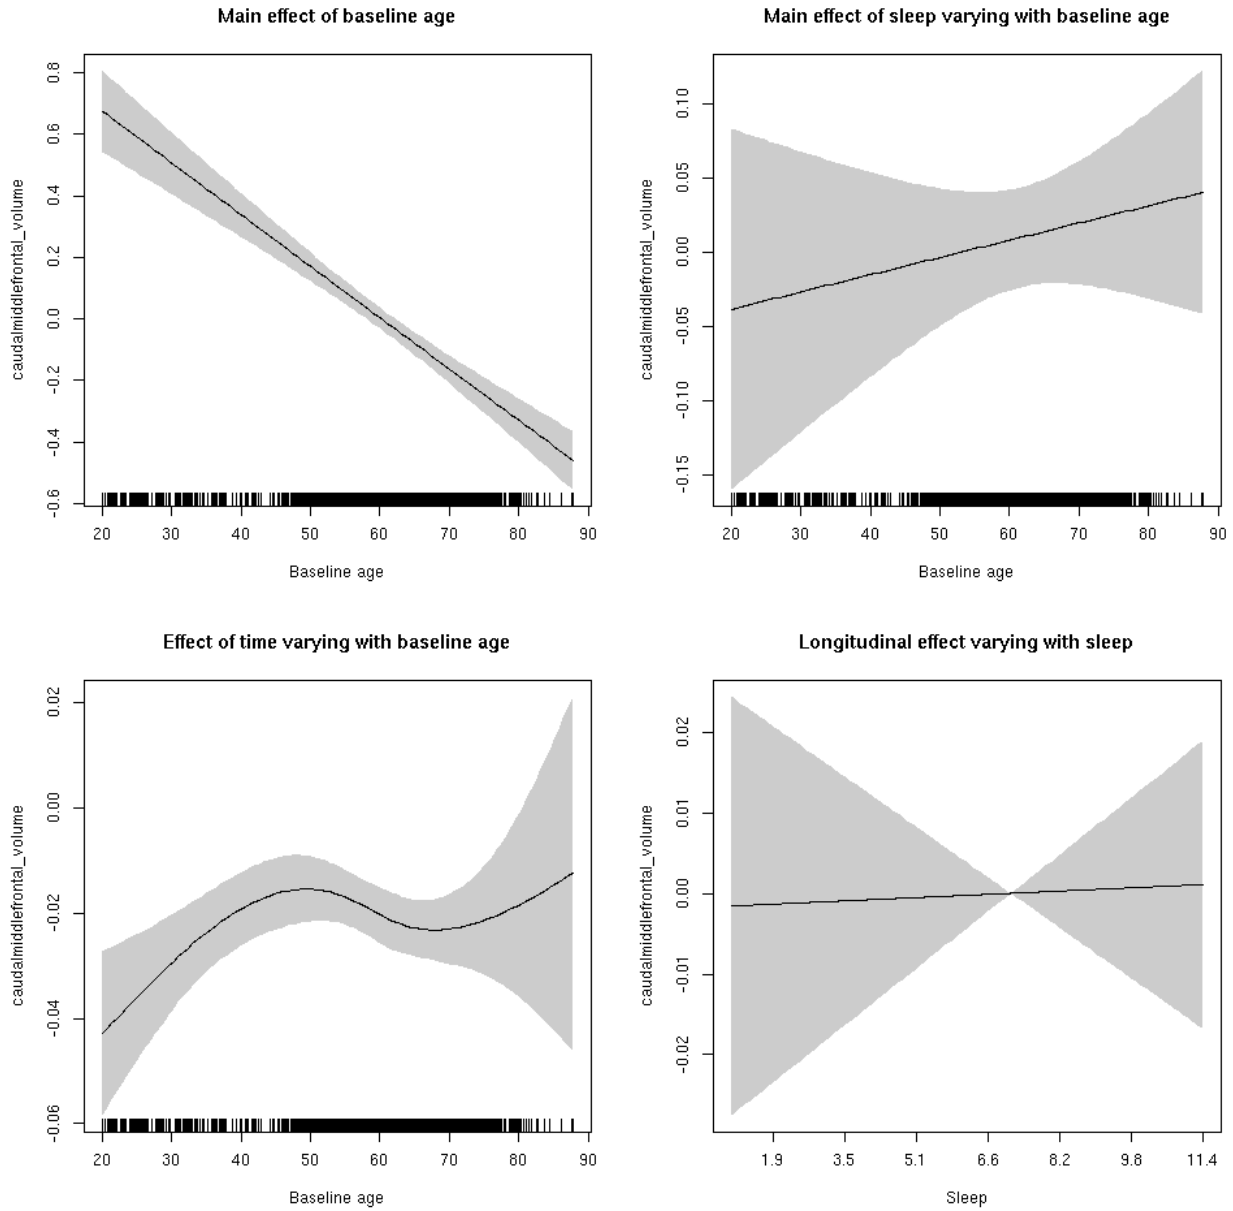

**Male: Full data** Below is the row for `s(sleep_z):time` from the model output.

```
## s(sleep_z):time  1.000  1.000  0.396  0.5290
```

Below are plots of a plot of `s(bl_age)`, `s(bl_age):sleep_z`, `s(bl_age):time`, and `s(sleep_z):time`. For `s(sleep_z):time`, roughly, if we cannot fit a straight line through the confidence bands, there is evidence that the effect of time depends on sleep duration. It is correct that the confidence interval is zero at one point along the axis; this happens because we do not include the main effect.

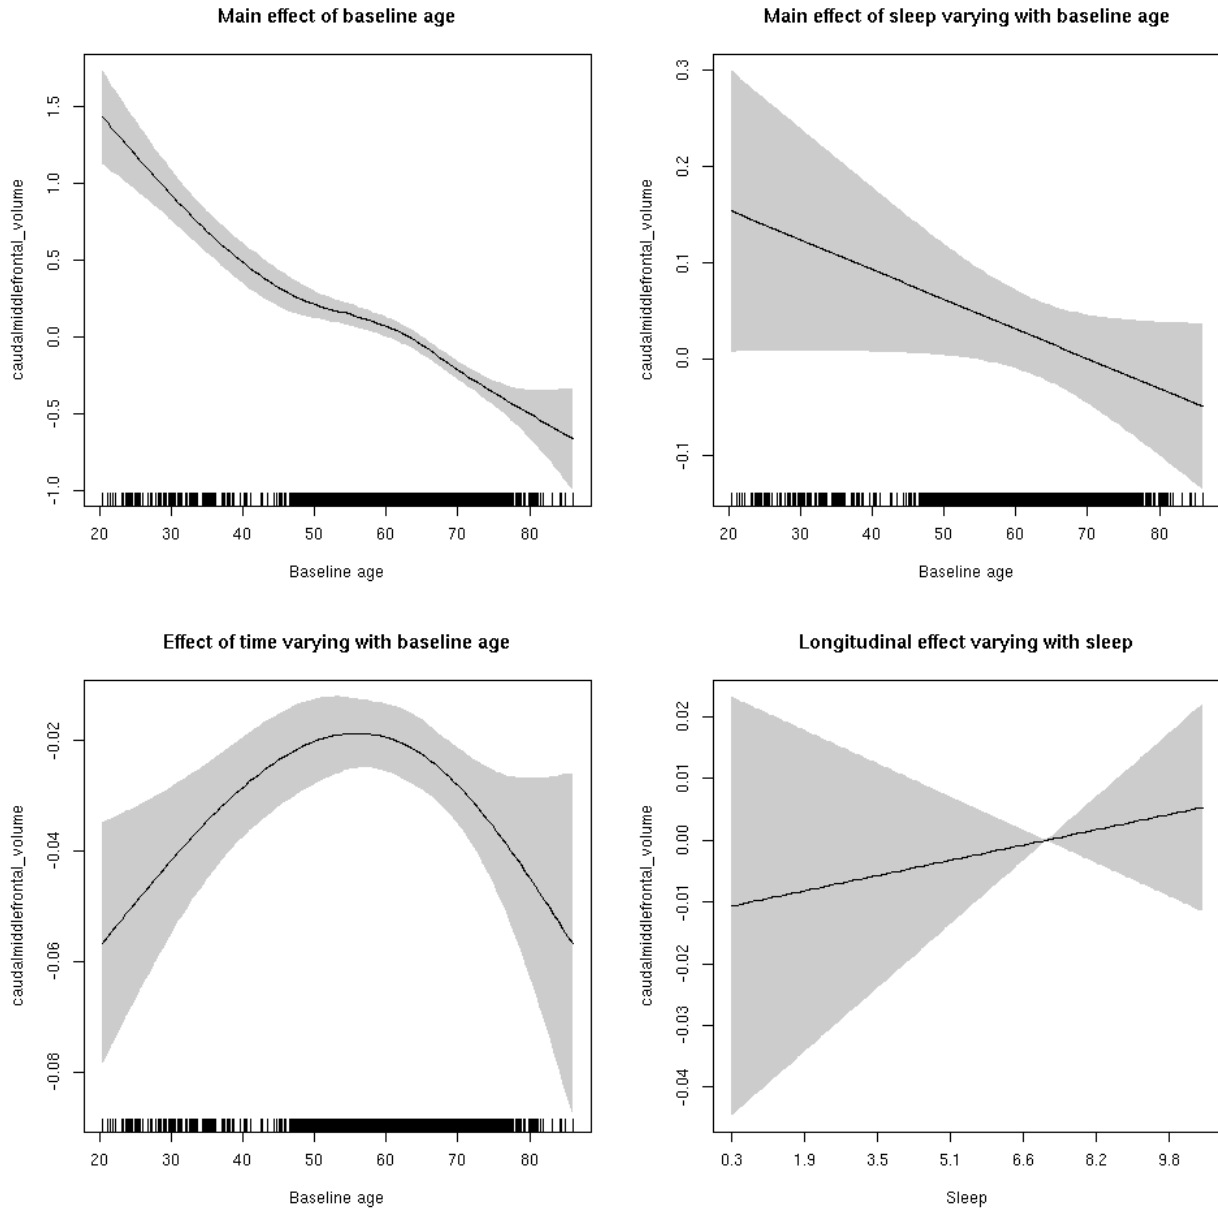

## caudalmiddlefrontal\_volume

**Full data** Below is the model output. The term `s(sleep_z):time` is probably what we care most about.

```
##
## Family: gaussian
## Link function: identity
##
## Formula:
## value ~ sex + site + icv + s(bl_age, k = 10, bs = "cr") + s(bl_age,
##   by = sleep_z, bs = "cr") + +s(bl_age, by = time, k = 5, bs = "cr") +
##   s(sleep_z, by = time, k = 5, bs = "cr", pc = 0)
## <environment: 0x5630035a36f8>
```

```

##
## Parametric coefficients:
##           Estimate Std. Error t value Pr(>|t|)
## (Intercept)  0.30110    0.05904   5.100 3.48e-07 ***
## sexmale      -0.08521    0.03037  -2.806 0.005031 **
## siteousAvanto -0.89351    0.07206 -12.400 < 2e-16 ***
## siteousPrisma -0.57269    0.16475  -3.476 0.000511 ***
## siteousSkyra  -1.07789    0.06978 -15.447 < 2e-16 ***
## siteUB        -0.56646    0.13599  -4.166 3.14e-05 ***
## siteUCAM      -0.64851    0.07311  -8.871 < 2e-16 ***
## siteUKB       -0.09357    0.05597  -1.672 0.094601 .
## siteUmU       -0.26234    0.08425  -3.114 0.001852 **
## icv           0.58578    0.01493  39.223 < 2e-16 ***
## ---
## Signif. codes:  0 '***' 0.001 '**' 0.01 '*' 0.05 '.' 0.1 ' ' 1
##
## Approximate significance of smooth terms:
##           edf Ref.df      F p-value
## s(bl_age)      2.724  2.724 116.214 <2e-16 ***
## s(bl_age):sleep_z 2.000  2.000   0.810   0.445
## s(bl_age):time  3.502  3.502  48.775 <2e-16 ***
## s(sleep_z):time  2.943  2.943   1.931   0.105
## ---
## Signif. codes:  0 '***' 0.001 '**' 0.01 '*' 0.05 '.' 0.1 ' ' 1
##
## R-sq.(adj) =  0.423
## lmer.REML = 9966.1 Scale est. = 0.036813 n = 8163

```

Below are plots of a plot of  $s(\text{bl\_age})$ ,  $s(\text{bl\_age}):\text{sleep\_z}$ ,  $s(\text{bl\_age}):\text{time}$ , and  $s(\text{sleep\_z}):\text{time}$ . For  $s(\text{sleep\_z}):\text{time}$ , roughly, if we cannot fit a straight line through the confidence bands, there is evidence that the effect of time depends on sleep duration. It is correct that the confidence interval is zero at one point along the axis; this happens because we do not include the main effect.



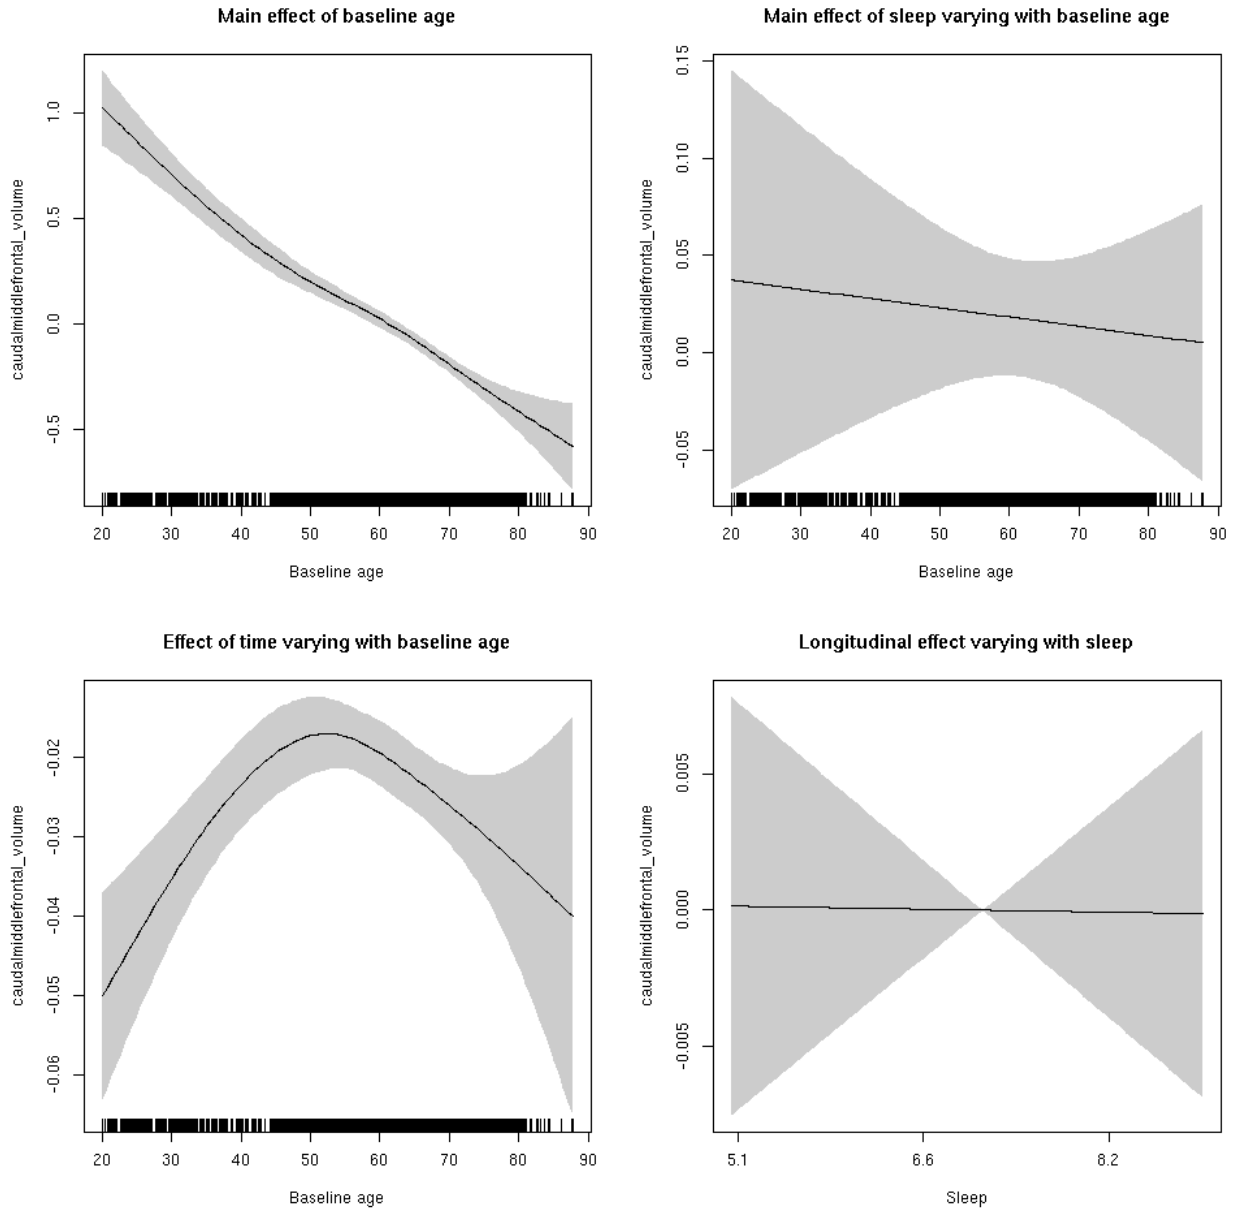

**Restricted to sleep  $\geq 5$  and  $\leq 9$  hours** Below is the row for `s(sleep_z):time` from the model output.

```
## s(sleep_z):time 1.000 1.000 0.001 0.969
```

Below are plots of a plot of `s(bl_age)`, `s(bl_age):sleep_z`, `s(bl_age):time`, and `s(sleep_z):time`. For `s(sleep_z):time`, roughly, if we cannot fit a straight line through the confidence bands, there is evidence that the effect of time depends on sleep duration. It is correct that the confidence interval is zero at one point along the axis; this happens because we do not include the main effect.



### cuneus\_area: Stratified by sex

**Female: Full data** Below is the row for `s(sleep_z):time` from the model output.

```
## s(sleep_z):time  1.000  1.000  0.965  0.326
```

Below are plots of a plot of `s(bl_age)`, `s(bl_age):sleep_z`, `s(bl_age):time`, and `s(sleep_z):time`. For `s(sleep_z):time`, roughly, if we cannot fit a straight line through the confidence bands, there is evidence that the effect of time depends on sleep duration. It is correct that the confidence interval is zero at one point along the axis; this happens because we do not include the main effect.

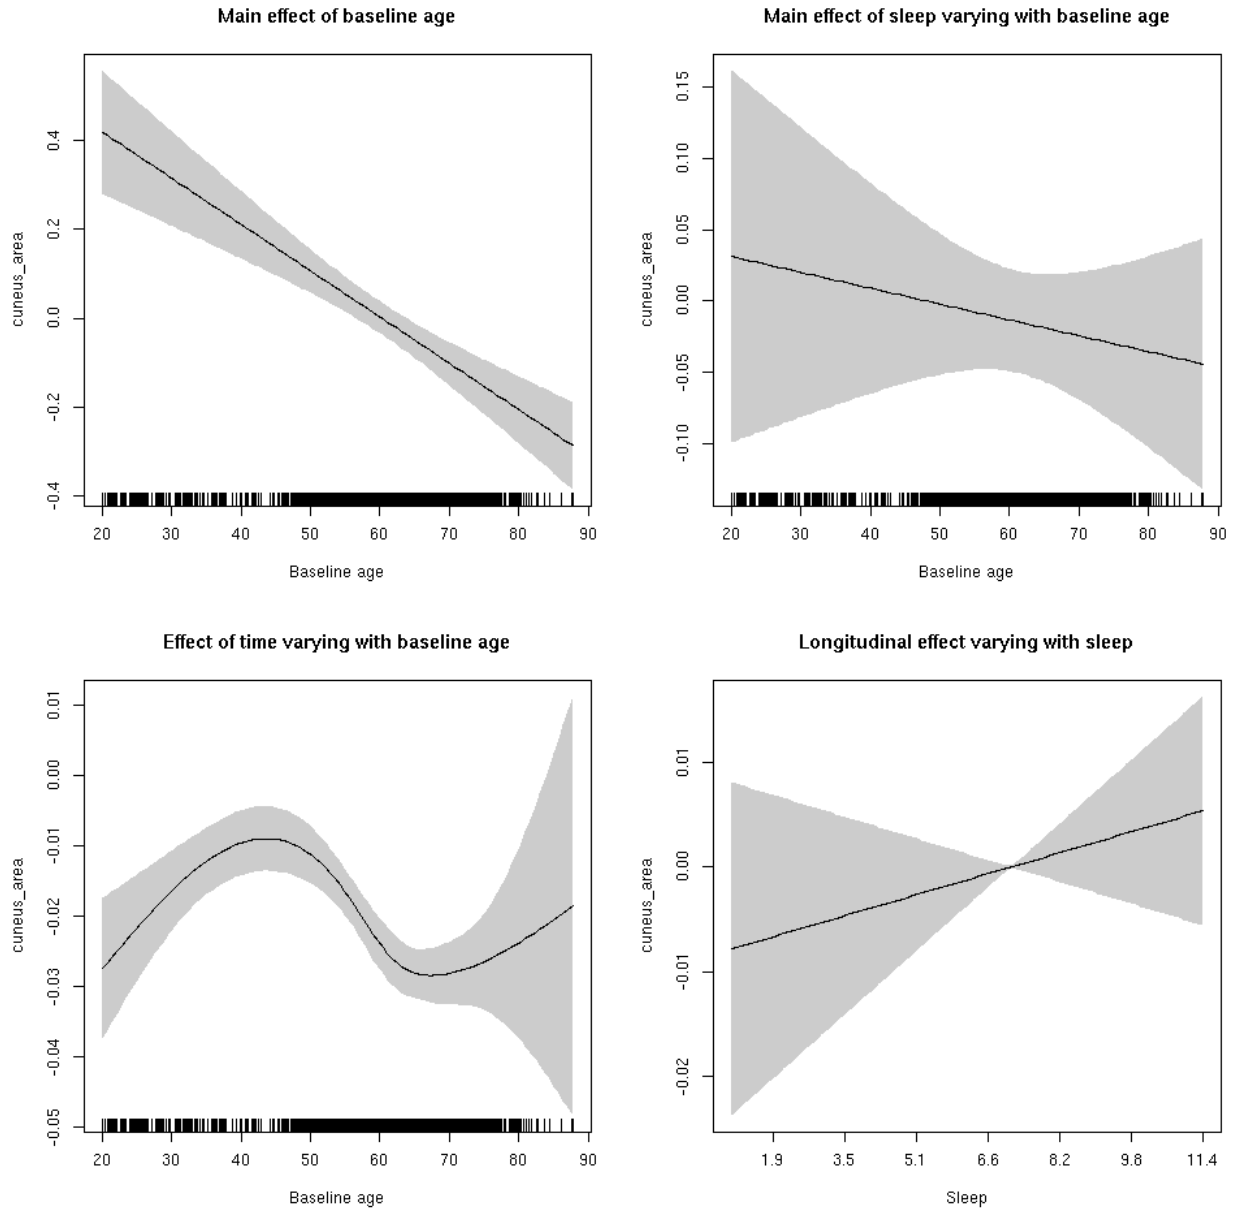

**Male: Full data** Below is the row for `s(sleep_z):time` from the model output.

```
## s(sleep_z):time  1.000  1.000  1.359  0.244
```

Below are plots of a plot of `s(bl_age)`, `s(bl_age):sleep_z`, `s(bl_age):time`, and `s(sleep_z):time`. For `s(sleep_z):time`, roughly, if we cannot fit a straight line through the confidence bands, there is evidence that the effect of time depends on sleep duration. It is correct that confidence interval is zero at one point along the axis; this happens because we do not include the main effect.

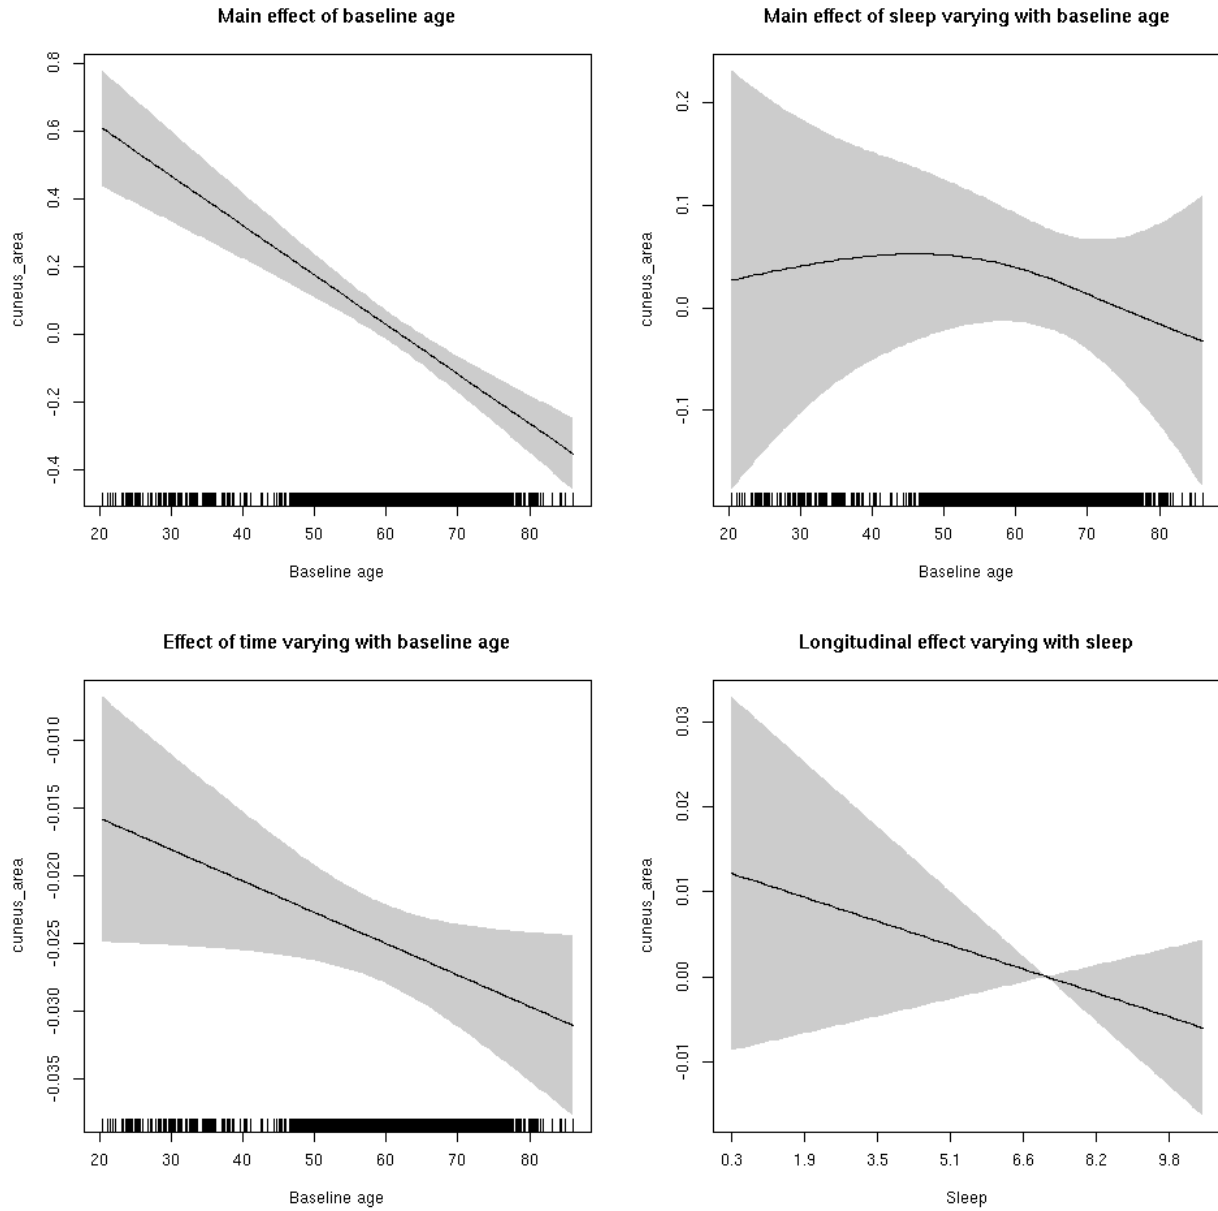

## cuneus\_area

**Full data** Below is the model output. The term `s(sleep_z):time` is probably what we care most about.

```
##
## Family: gaussian
## Link function: identity
##
## Formula:
## value ~ sex + site + icv + s(bl_age, k = 10, bs = "cr") + s(bl_age,
##   by = sleep_z, bs = "cr") + +s(bl_age, by = time, k = 5, bs = "cr") +
##   s(sleep_z, by = time, k = 5, bs = "cr", pc = 0)
## <environment: 0x5630035abbc8>
```

```

##
## Parametric coefficients:
##           Estimate Std. Error t value Pr(>|t|)
## (Intercept) -0.02066   0.06401  -0.323  0.74686
## sexmale      0.38481   0.03325  11.573 < 2e-16 ***
## siteousAvanto -0.09491   0.07879  -1.205  0.22841
## siteousPrisma -0.31533   0.12237  -2.577  0.00999 **
## siteousSkyra  0.06836   0.07641   0.895  0.37102
## siteUB       -0.41388   0.15084  -2.744  0.00609 **
## siteUCAM     -0.15320   0.08021  -1.910  0.05617 .
## siteUKB      -0.10281   0.05986  -1.717  0.08594 .
## siteUmU     -0.24344   0.09277  -2.624  0.00870 **
## icv          0.33132   0.01594  20.789 < 2e-16 ***
## ---
## Signif. codes:  0 '***' 0.001 '**' 0.01 '*' 0.05 '.' 0.1 ' ' 1
##
## Approximate significance of smooth terms:
##           edf Ref.df      F p-value
## s(bl_age)      1.000  1.000  92.307 <2e-16 ***
## s(bl_age):sleep_z 2.000  2.000   0.382  0.682
## s(bl_age):time  3.782  3.782 164.532 <2e-16 ***
## s(sleep_z):time 1.000  1.000   0.003  0.956
## ---
## Signif. codes:  0 '***' 0.001 '**' 0.01 '*' 0.05 '.' 0.1 ' ' 1
##
## R-sq.(adj) =  0.266
## lmer.REML = 6625.3  Scale est. = 0.013944  n = 8168

```

Below are plots of a plot of `s(bl_age)`, `s(bl_age):sleep_z`, `s(bl_age):time`, and `s(sleep_z):time`. For `s(sleep_z):time`, roughly, if we cannot fit a straight line through the confidence bands, there is evidence that the effect of time depends on sleep duration. It is correct that the confidence interval is zero at one point along the axis; this happens because we do not include the main effect.

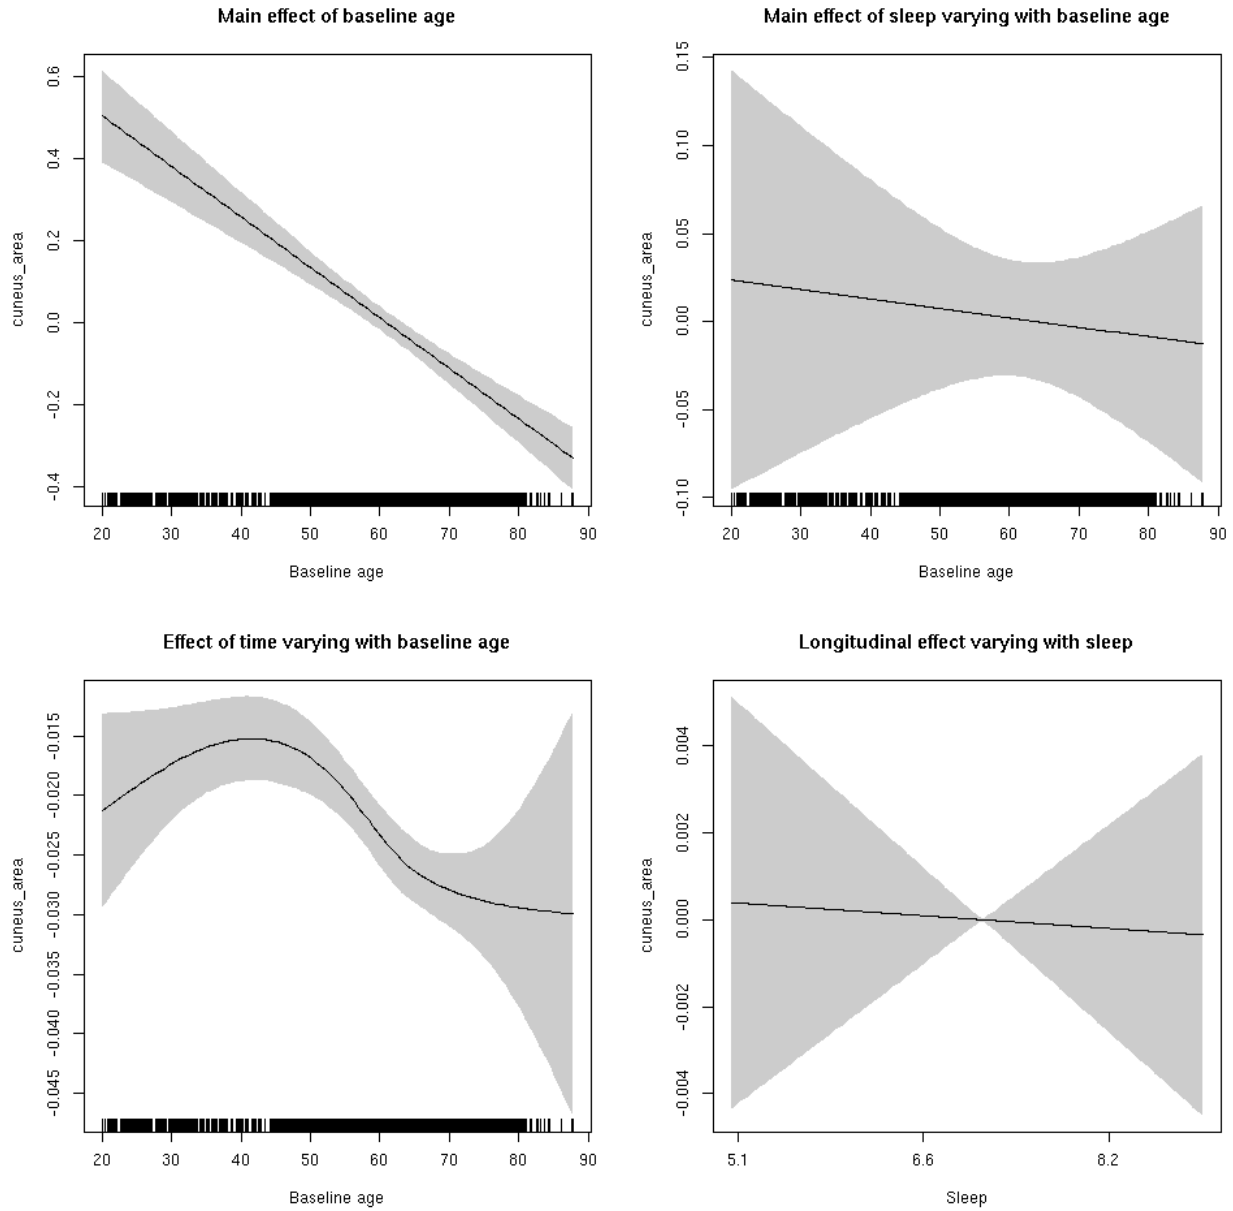

**Restricted to sleep  $\geq 5$  and  $\leq 9$  hours** Below is the row for `s(sleep_z):time` from the model output.

```
## s(sleep_z):time 1.000 1.000 0.028 0.867
```

Below are plots of a plot of `s(bl_age)`, `s(bl_age):sleep_z`, `s(bl_age):time`, and `s(sleep_z):time`. For `s(sleep_z):time`, roughly, if we cannot fit a straight line through the confidence bands, there is evidence that the effect of time depends on sleep duration. It is correct that the confidence interval is zero at one point along the axis; this happens because we do not include the main effect.



### cuneus\_thickness: Stratified by sex

**Female: Full data** Below is the row for `s(sleep_z):time` from the model output.

```
## s(sleep_z):time  1.000  1.000  0.010  0.9213
```

Below are plots of a plot of `s(bl_age)`, `s(bl_age):sleep_z`, `s(bl_age):time`, and `s(sleep_z):time`. For `s(sleep_z):time`, roughly, if we cannot fit a straight line through the confidence bands, there is evidence that the effect of time depends on sleep duration. It is correct that the confidence interval is zero at one point along the axis; this happens because we do not include the main effect.

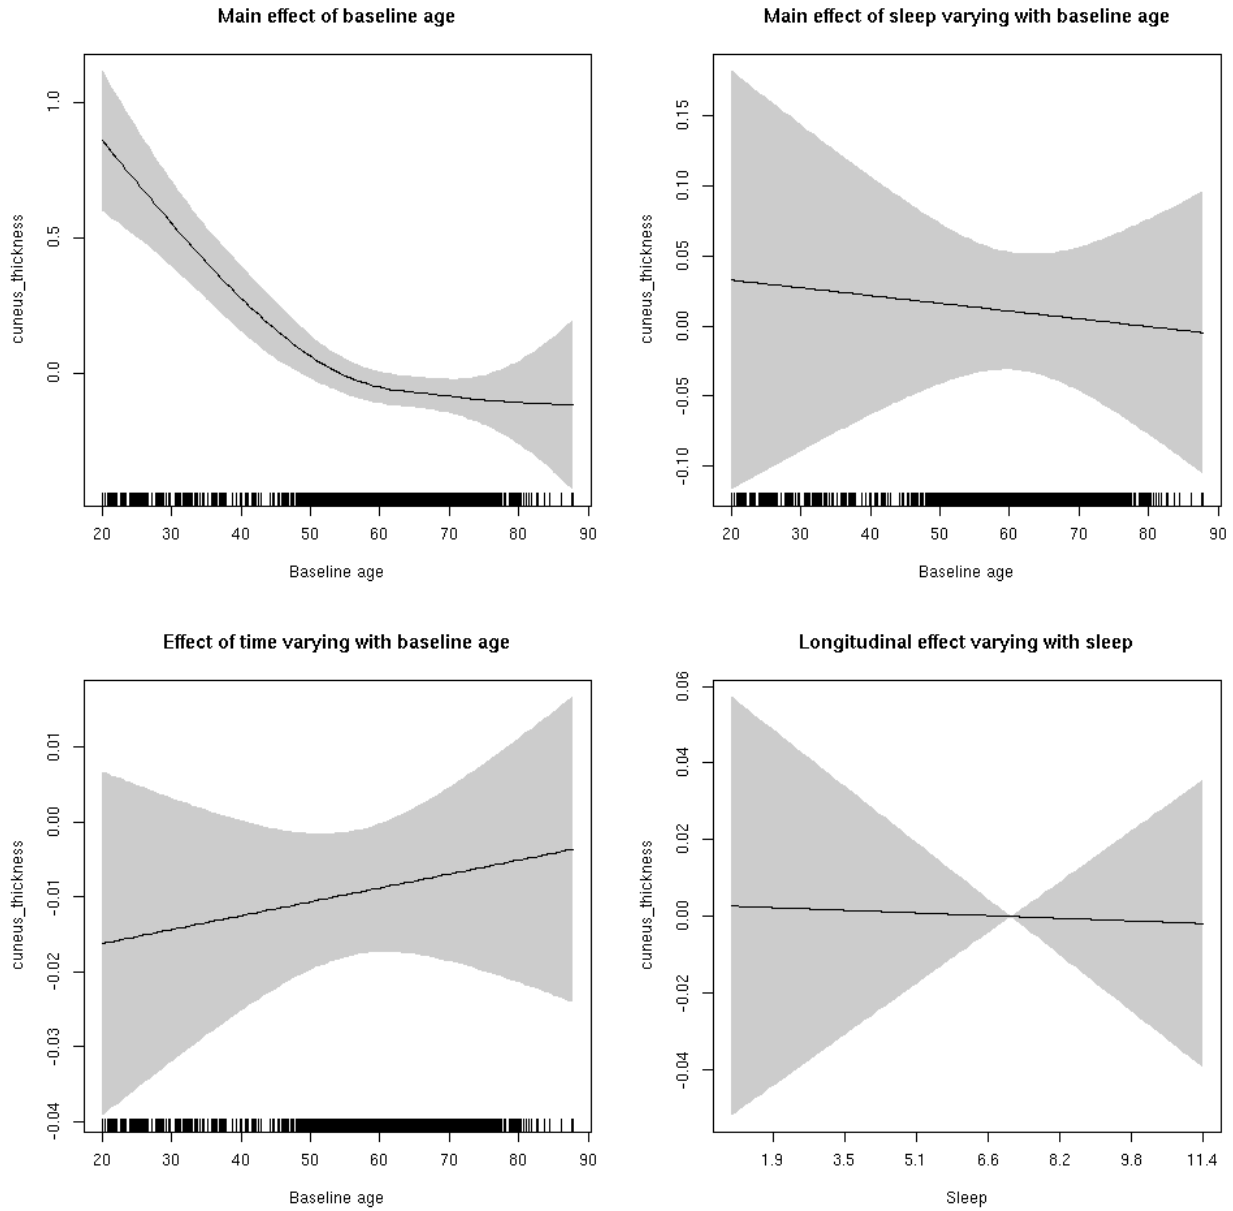

**Male: Full data** Below is the row for `s(sleep_z):time` from the model output.

```
## s(sleep_z):time 1.000 1.000 0.365 0.545820
```

Below are plots of a plot of `s(bl_age)`, `s(bl_age):sleep_z`, `s(bl_age):time`, and `s(sleep_z):time`. For `s(sleep_z):time`, roughly, if we cannot fit a straight line through the confidence bands, there is evidence that the effect of time depends on sleep duration. It is correct that the confidence interval is zero at one point along the axis; this happens because we do not include the main effect.



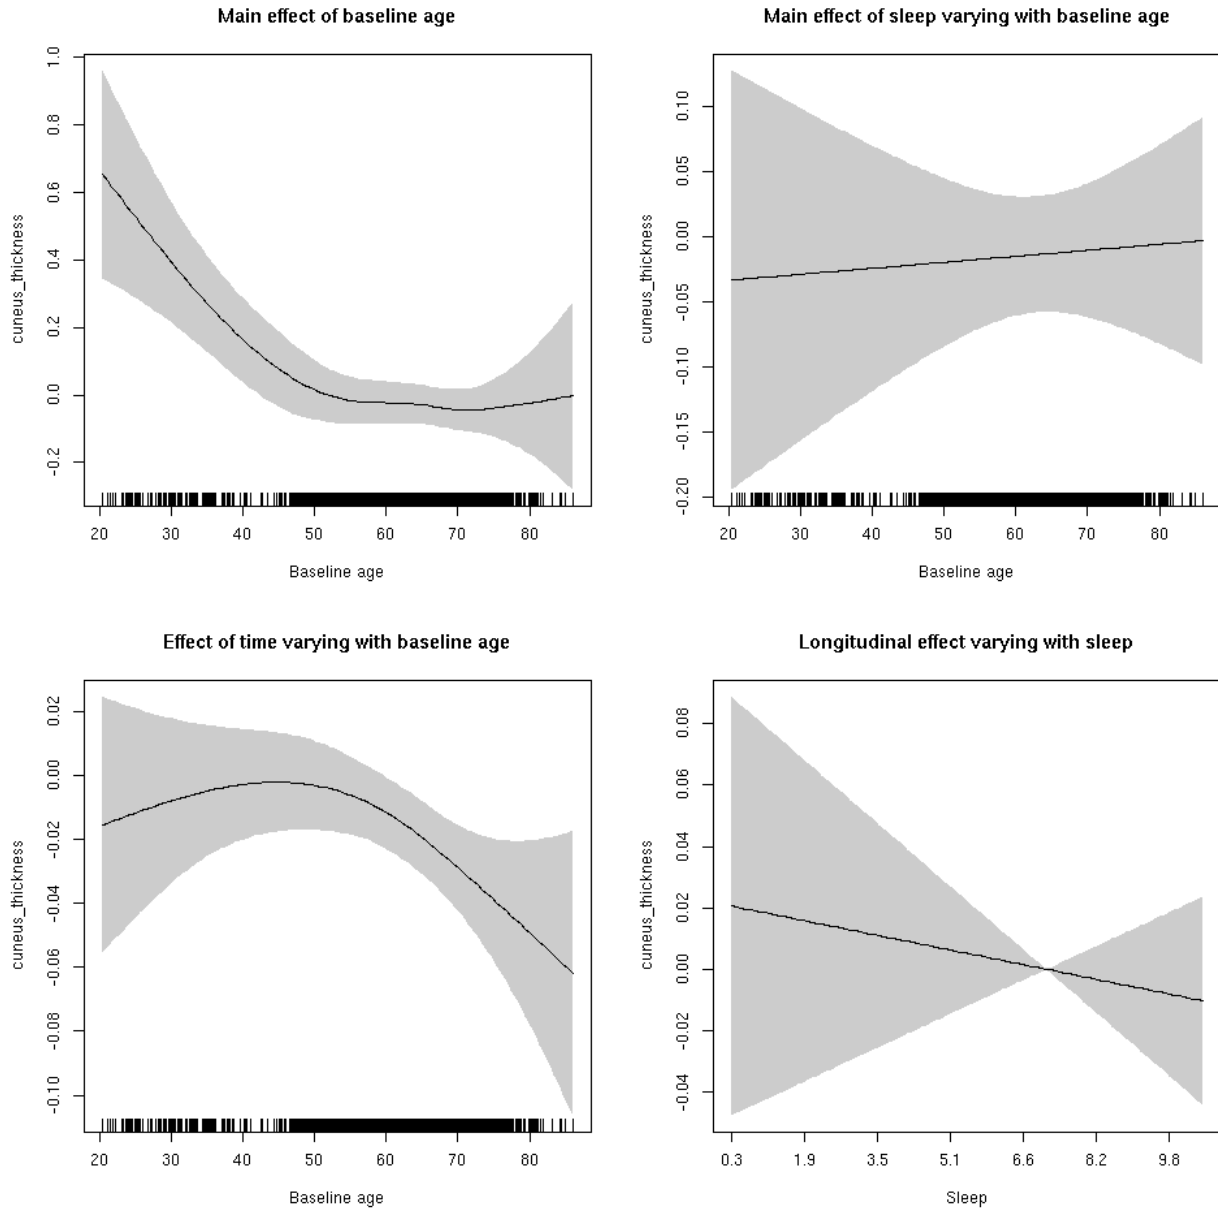

## cuneus\_thickness

**Full data** Below is the model output. The term `s(sleep_z):time` is probably what we care most about.

```
##
## Family: gaussian
## Link function: identity
##
## Formula:
## value ~ sex + site + s(bl_age, k = 10, bs = "cr") + s(bl_age,
##   by = sleep_z, bs = "cr") + +s(bl_age, by = time, k = 5, bs = "cr") +
##   s(sleep_z, by = time, k = 5, bs = "cr", pc = 0)
## <environment: 0x5630035cc6c8>
```

```

##
## Parametric coefficients:
##           Estimate Std. Error t value Pr(>|t|)
## (Intercept) -0.74588    0.05778 -12.910 < 2e-16 ***
## sexmale      0.19011    0.02900   6.556 5.88e-11 ***
## siteousAvanto -0.33566    0.07659  -4.383 1.19e-05 ***
## siteousPrisma  0.60847    0.30919   1.968  0.04911 *
## siteousSkyra   1.06897    0.07655  13.965 < 2e-16 ***
## siteUB        0.42902    0.15380   2.790  0.00529 **
## siteUCAM      0.22123    0.07946   2.784  0.00538 **
## siteUKB       0.72547    0.05853  12.395 < 2e-16 ***
## siteUmU       1.17851    0.09533  12.362 < 2e-16 ***
## ---
## Signif. codes:  0 '***' 0.001 '**' 0.01 '*' 0.05 '.' 0.1 ' ' 1
##
## Approximate significance of smooth terms:
##           edf Ref.df      F p-value
## s(bl_age)      3.372  3.372 23.615 < 2e-16 ***
## s(bl_age):sleep_z 2.000  2.000  0.010  0.990
## s(bl_age):time  3.046  3.046  7.941 2.3e-05 ***
## s(sleep_z):time  1.000  1.000  0.129  0.719
## ---
## Signif. codes:  0 '***' 0.001 '**' 0.01 '*' 0.05 '.' 0.1 ' ' 1
##
## R-sq.(adj) =  0.138
## lmer.REML = 17386  Scale est. = 0.16139  n = 8176

```

Below are plots of a plot of  $s(\text{bl\_age})$ ,  $s(\text{bl\_age}):\text{sleep\_z}$ ,  $s(\text{bl\_age}):\text{time}$ , and  $s(\text{sleep\_z}):\text{time}$ . For  $s(\text{sleep\_z}):\text{time}$ , roughly, if we cannot fit a straight line through the confidence bands, there is evidence that the effect of time depends on sleep duration. It is correct that the confidence interval is zero at one point along the axis; this happens because we do not include the main effect.

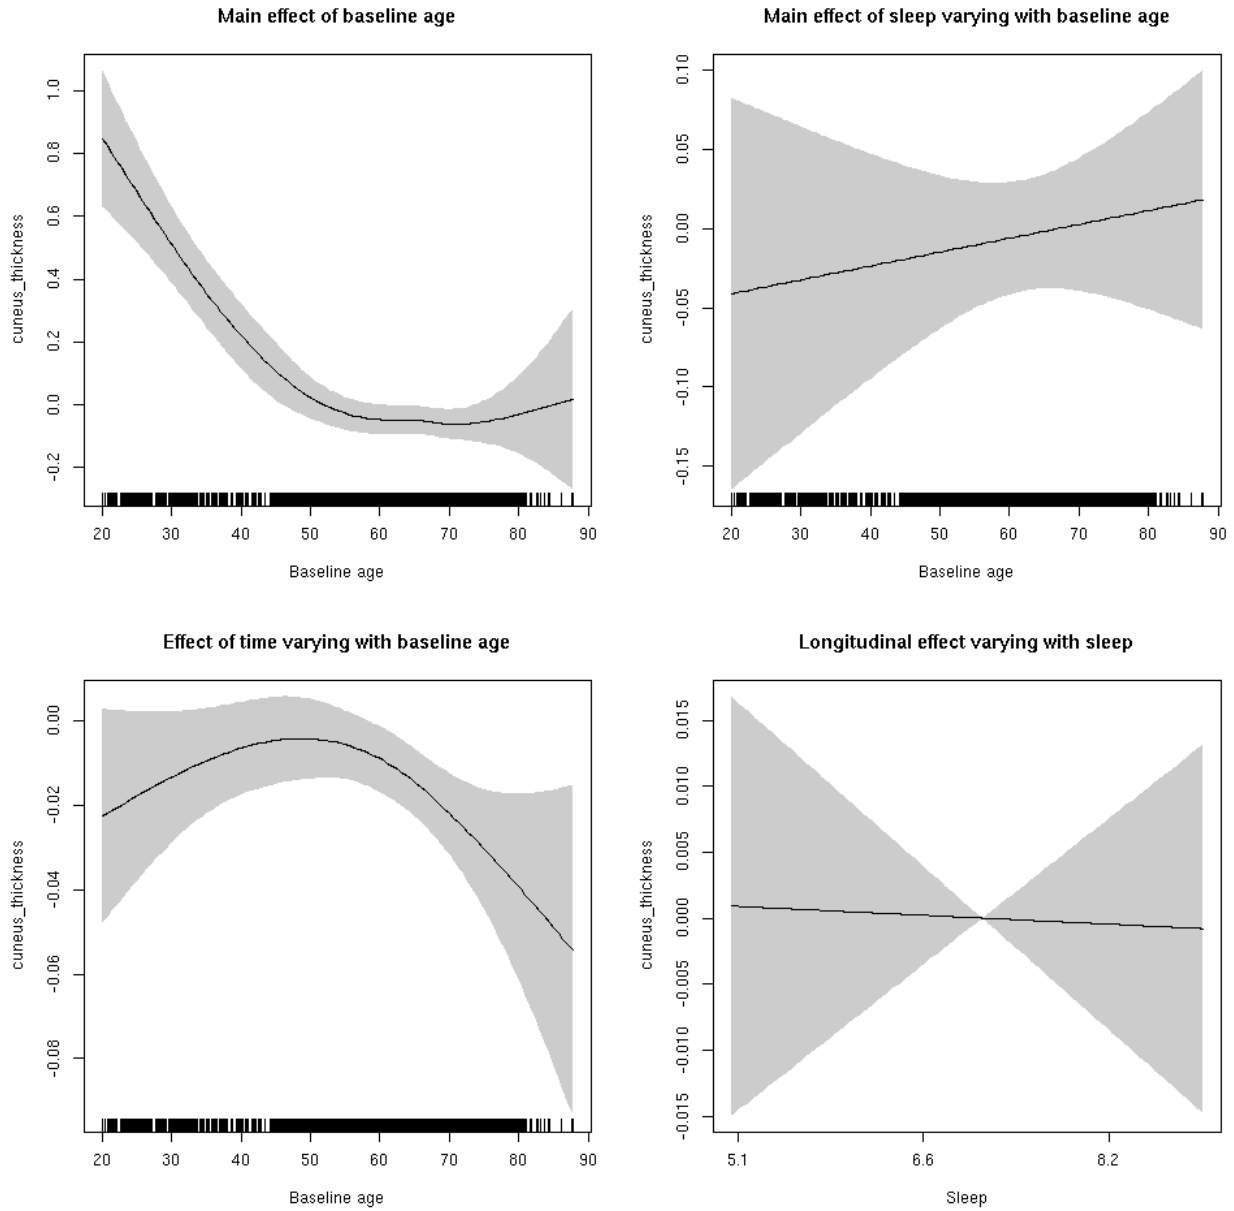

**Restricted to sleep  $\geq 5$  and  $\leq 9$  hours** Below is the row for `s(sleep_z):time` from the model output.

```
## s(sleep_z):time  1.000  1.000  0.013  0.909
```

Below are plots of a plot of `s(bl_age)`, `s(bl_age):sleep_z`, `s(bl_age):time`, and `s(sleep_z):time`. For `s(sleep_z):time`, roughly, if we cannot fit a straight line through the confidence bands, there is evidence that the effect of time depends on sleep duration. It is correct that the confidence interval is zero at one point along the axis; this happens because we do not include the main effect.



### cuneus\_volume: Stratified by sex

**Female: Full data** Below is the row for `s(sleep_z):time` from the model output.

```
## s(sleep_z):time  1.000  1.000  1.295  0.255
```

Below are plots of a plot of `s(bl_age)`, `s(bl_age):sleep_z`, `s(bl_age):time`, and `s(sleep_z):time`. For `s(sleep_z):time`, roughly, if we cannot fit a straight line through the confidence bands, there is evidence that the effect of time depends on sleep duration. It is correct that the confidence interval is zero at one point along the axis; this happens because we do not include the main effect.

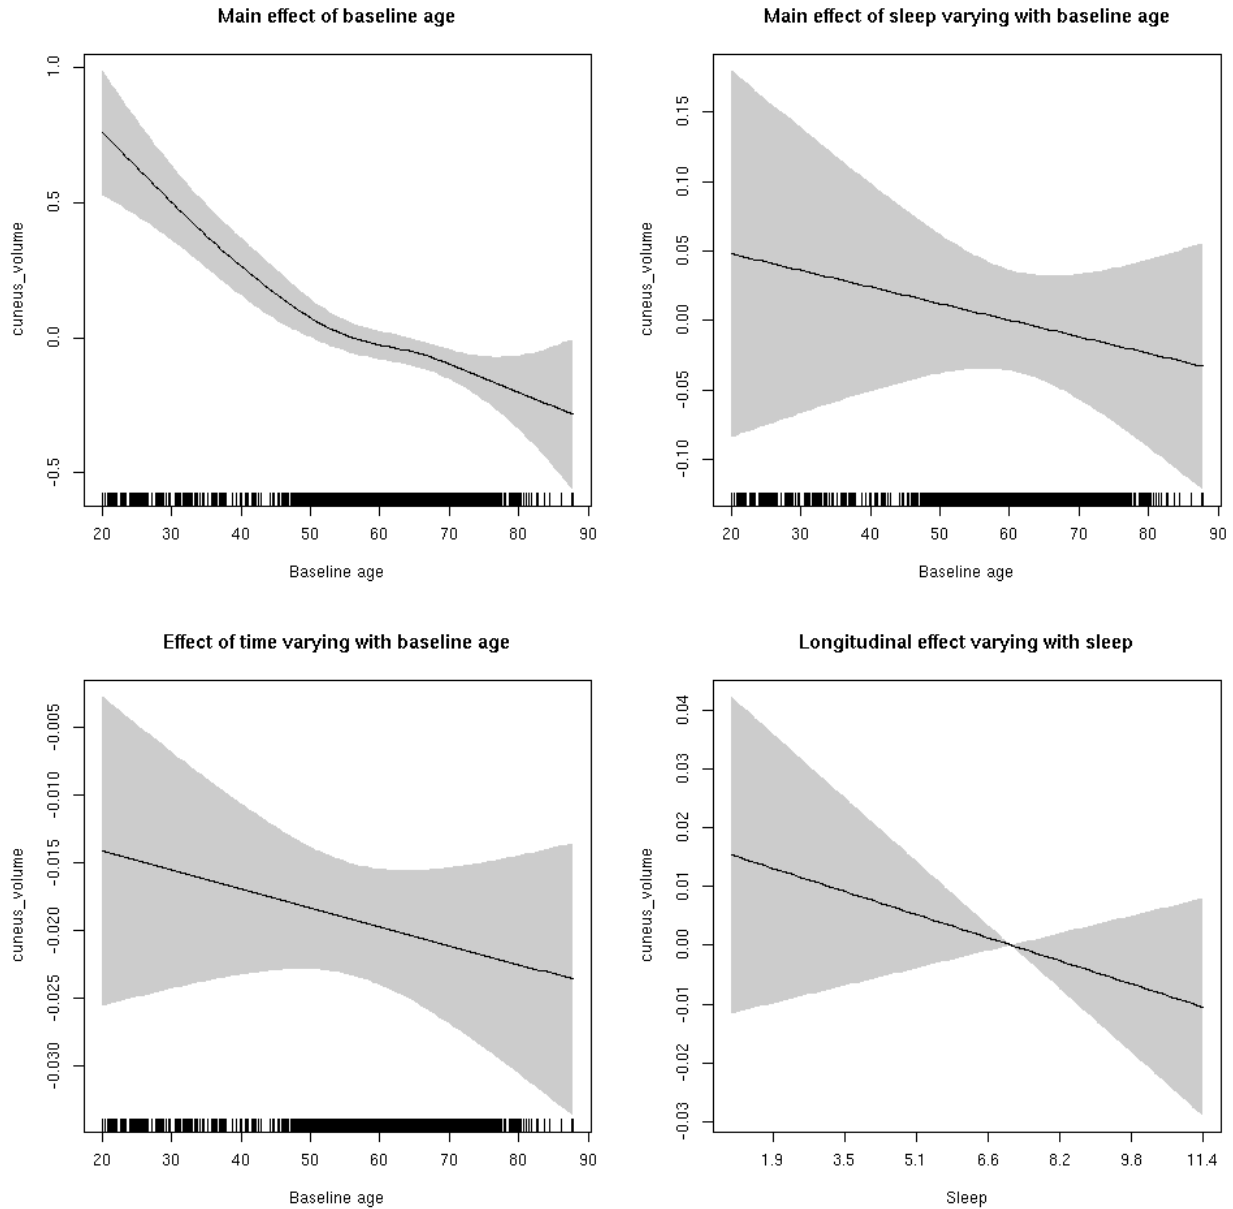

**Male: Full data** Below is the row for `s(sleep_z):time` from the model output.

```
## s(sleep_z):time  1.000  1.000  0.440  0.507
```

Below are plots of a plot of `s(bl_age)`, `s(bl_age):sleep_z`, `s(bl_age):time`, and `s(sleep_z):time`. For `s(sleep_z):time`, roughly, if we cannot fit a straight line through the confidence bands, there is evidence that the effect of time depends on sleep duration. It is correct that the confidence interval is zero at one point along the axis; this happens because we do not include the main effect.

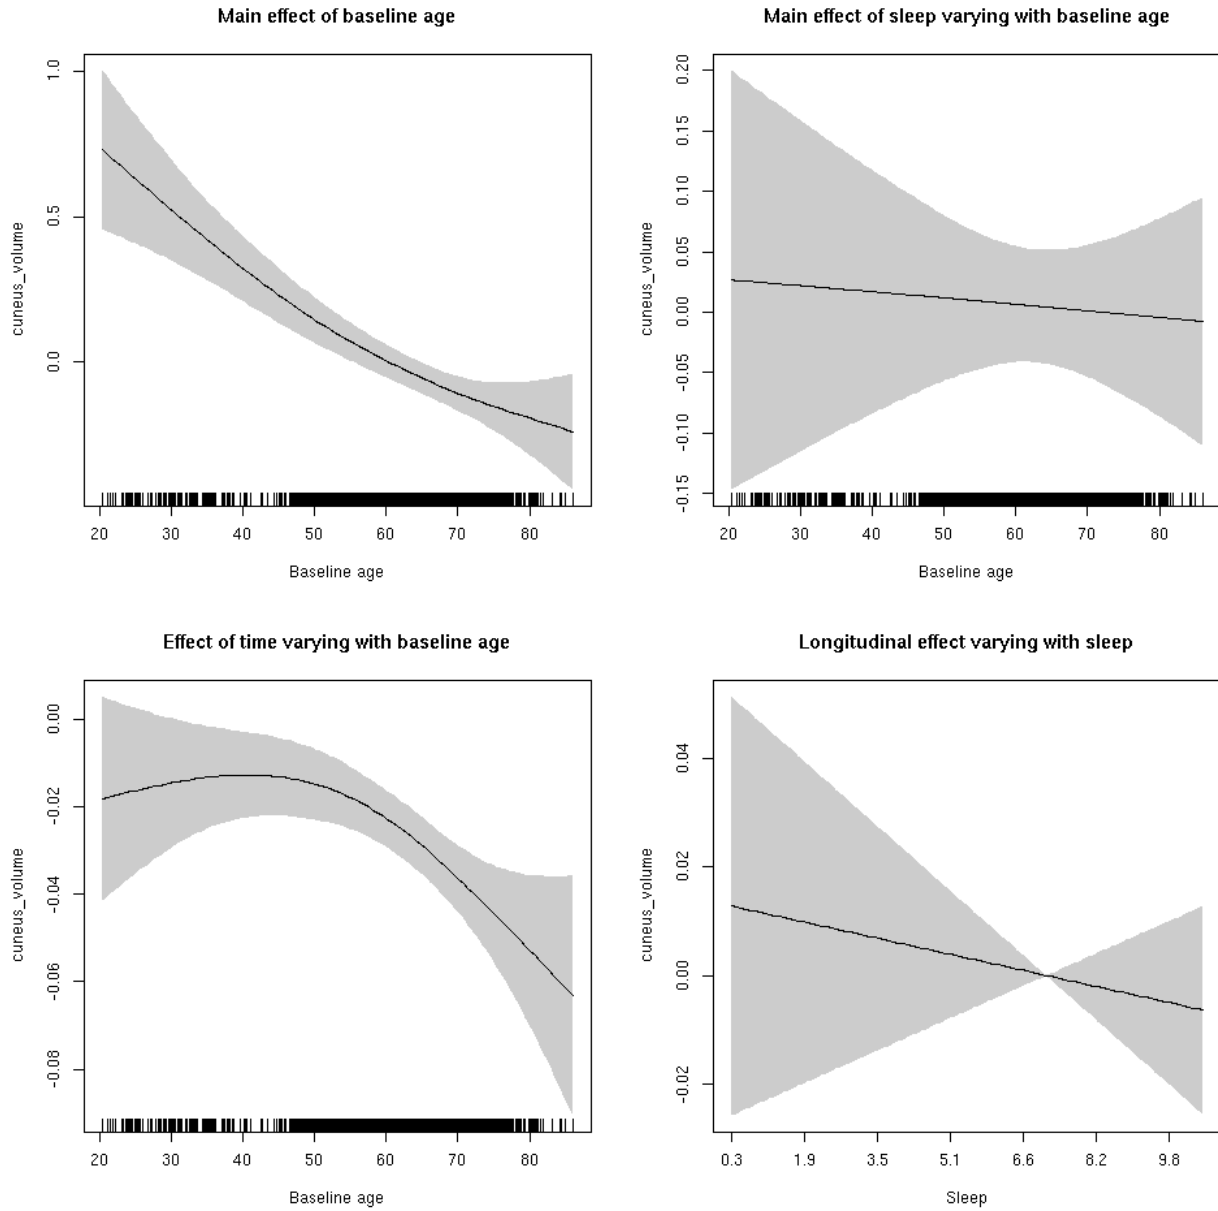

## cuneus\_volume

**Full data** Below is the model output. The term `s(sleep_z):time` is probably what we care most about.

```
##
## Family: gaussian
## Link function: identity
##
## Formula:
## value ~ sex + site + icv + s(bl_age, k = 10, bs = "cr") + s(bl_age,
##   by = sleep_z, bs = "cr") + +s(bl_age, by = time, k = 5, bs = "cr") +
##   s(sleep_z, by = time, k = 5, bs = "cr", pc = 0)
## <environment: 0x56300359ed80>
```

```

##
## Parametric coefficients:
##           Estimate Std. Error t value Pr(>|t|)
## (Intercept) -0.125355  0.066544  -1.884  0.0596 .
## sexmale      0.384016  0.034206  11.227 < 2e-16 ***
## siteousAvanto -0.352107  0.081222  -4.335 1.47e-05 ***
## siteousPrisma  0.084941  0.181826   0.467  0.6404
## siteousSkyra  0.688462  0.078632   8.755 < 2e-16 ***
## siteUB        -0.104731  0.153440  -0.683  0.4949
## siteUCAM      -0.035666  0.082453  -0.433  0.6653
## siteUKB       -0.003912  0.063118  -0.062  0.9506
## siteUmU       0.524173  0.095037   5.515 3.59e-08 ***
## icv           0.308719  0.016802  18.374 < 2e-16 ***
## ---
## Signif. codes:  0 '***' 0.001 '**' 0.01 '*' 0.05 '.' 0.1 ' ' 1
##
## Approximate significance of smooth terms:
##           edf Ref.df    F p-value
## s(bl_age)      2.732  2.732 39.541 <2e-16 ***
## s(bl_age):sleep_z 2.000  2.000  0.254  0.776
## s(bl_age):time  3.213  3.213 61.628 <2e-16 ***
## s(sleep_z):time  1.000  1.000  1.374  0.241
## ---
## Signif. codes:  0 '***' 0.001 '**' 0.01 '*' 0.05 '.' 0.1 ' ' 1
##
## R-sq.(adj) =  0.266
## lmer.REML = 11703  Scale est. = 0.044299  n = 8176

```

Below are plots of a plot of `s(bl_age)`, `s(bl_age):sleep_z`, `s(bl_age):time`, and `s(sleep_z):time`. For `s(sleep_z):time`, roughly, if we cannot fit a straight line through the confidence bands, there is evidence that the effect of time depends on sleep duration. It is correct that the confidence interval is zero at one point along the axis; this happens because we do not include the main effect.

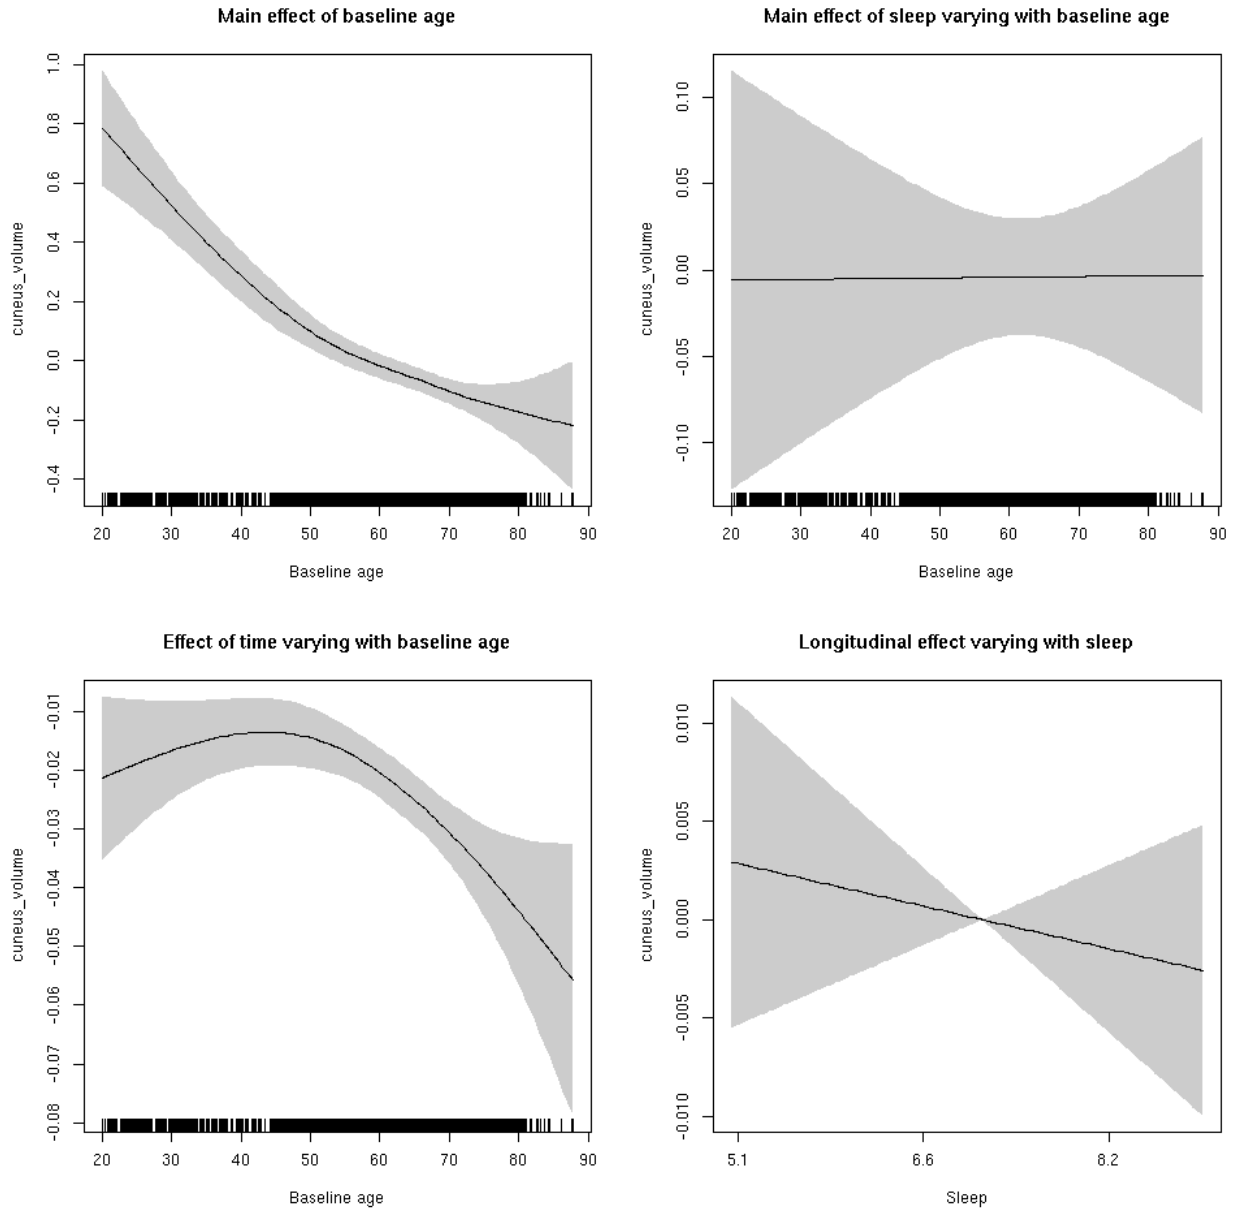

**Restricted to sleep  $\geq 5$  and  $\leq 9$  hours** Below is the row for `s(sleep_z):time` from the model output.

```
## s(sleep_z):time 1.000 1.000 0.484 0.487
```

Below are plots of a plot of `s(bl_age)`, `s(bl_age):sleep_z`, `s(bl_age):time`, and `s(sleep_z):time`. For `s(sleep_z):time`, roughly, if we cannot fit a straight line through the confidence bands, there is evidence that the effect of time depends on sleep duration. It is correct that the confidence interval is zero at one point along the axis; this happens because we do not include the main effect.





### entorhinal\_area: Stratified by sex

**Female: Full data** Below is the row for `s(sleep_z):time` from the model output.

```
## s(sleep_z):time    1    1 0.098  0.754
```

Below are plots of a plot of `s(bl_age)`, `s(bl_age):sleep_z`, `s(bl_age):time`, and `s(sleep_z):time`. For `s(sleep_z):time`, roughly, if we cannot fit a straight line through the confidence bands, there is evidence that the effect of time depends on sleep duration. It is correct that the confidence interval is zero at one point along the axis; this happens because we do not include the main effect.

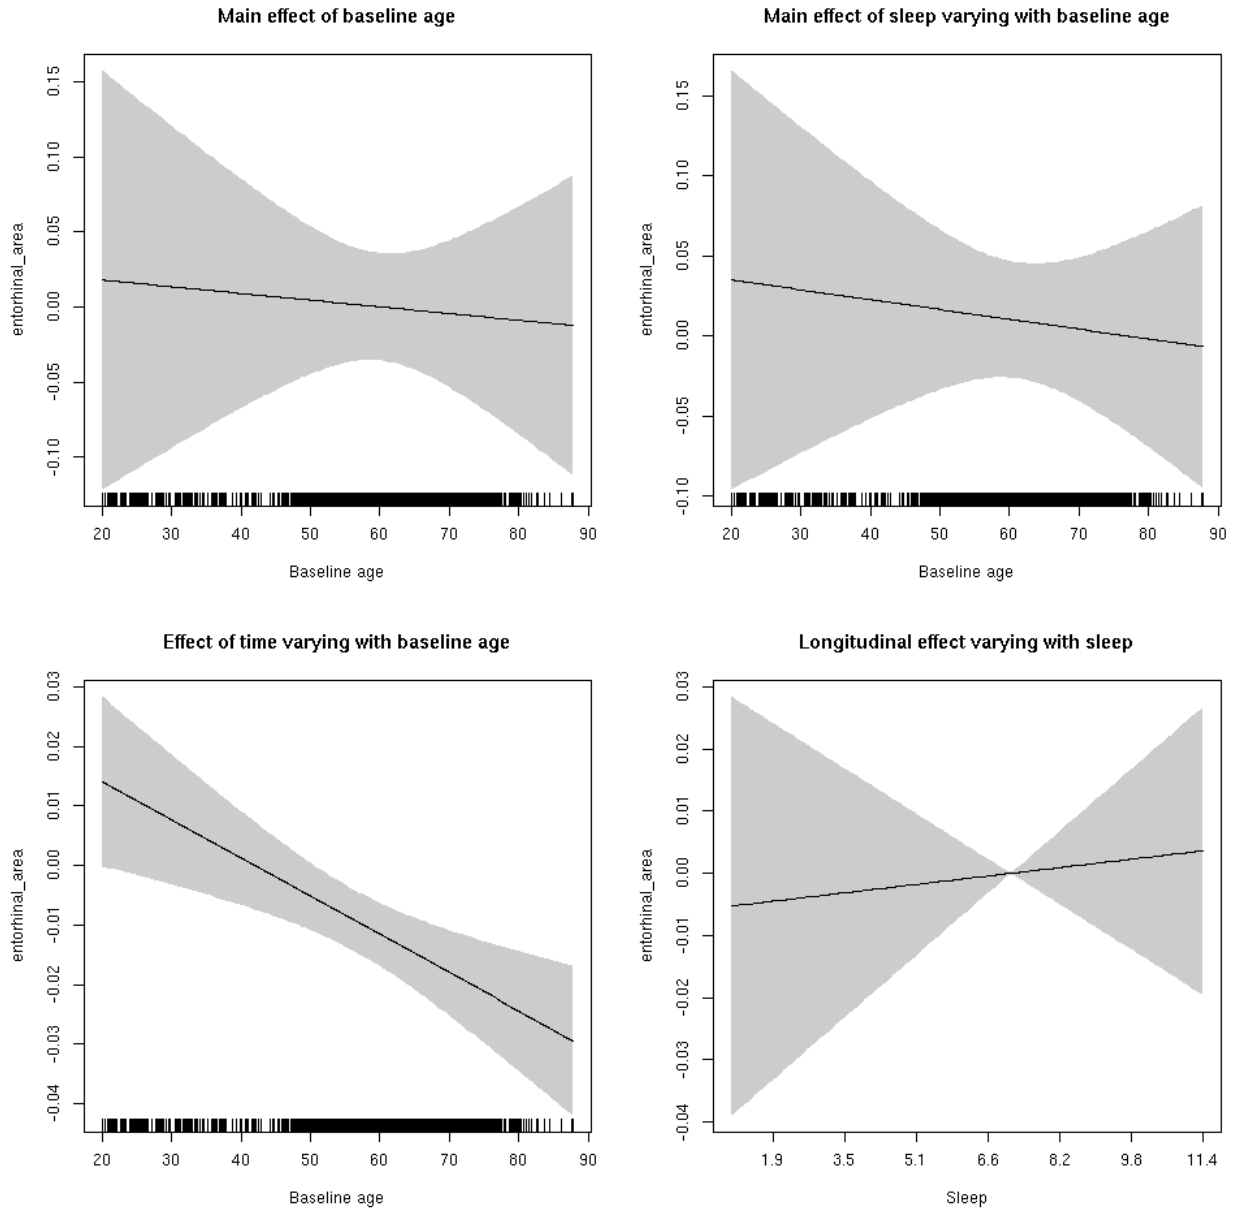

**Male: Full data** Below is the row for `s(sleep_z):time` from the model output.

```
## s(sleep_z):time      1      1 0.020  0.8863
```

Below are plots of a plot of `s(bl_age)`, `s(bl_age):sleep_z`, `s(bl_age):time`, and `s(sleep_z):time`. For `s(sleep_z):time`, roughly, if we cannot fit a straight line through the confidence bands, there is evidence that the effect of time depends on sleep duration. It is correct that the confidence interval is zero at one point along the axis; this happens because we do not include the main effect.

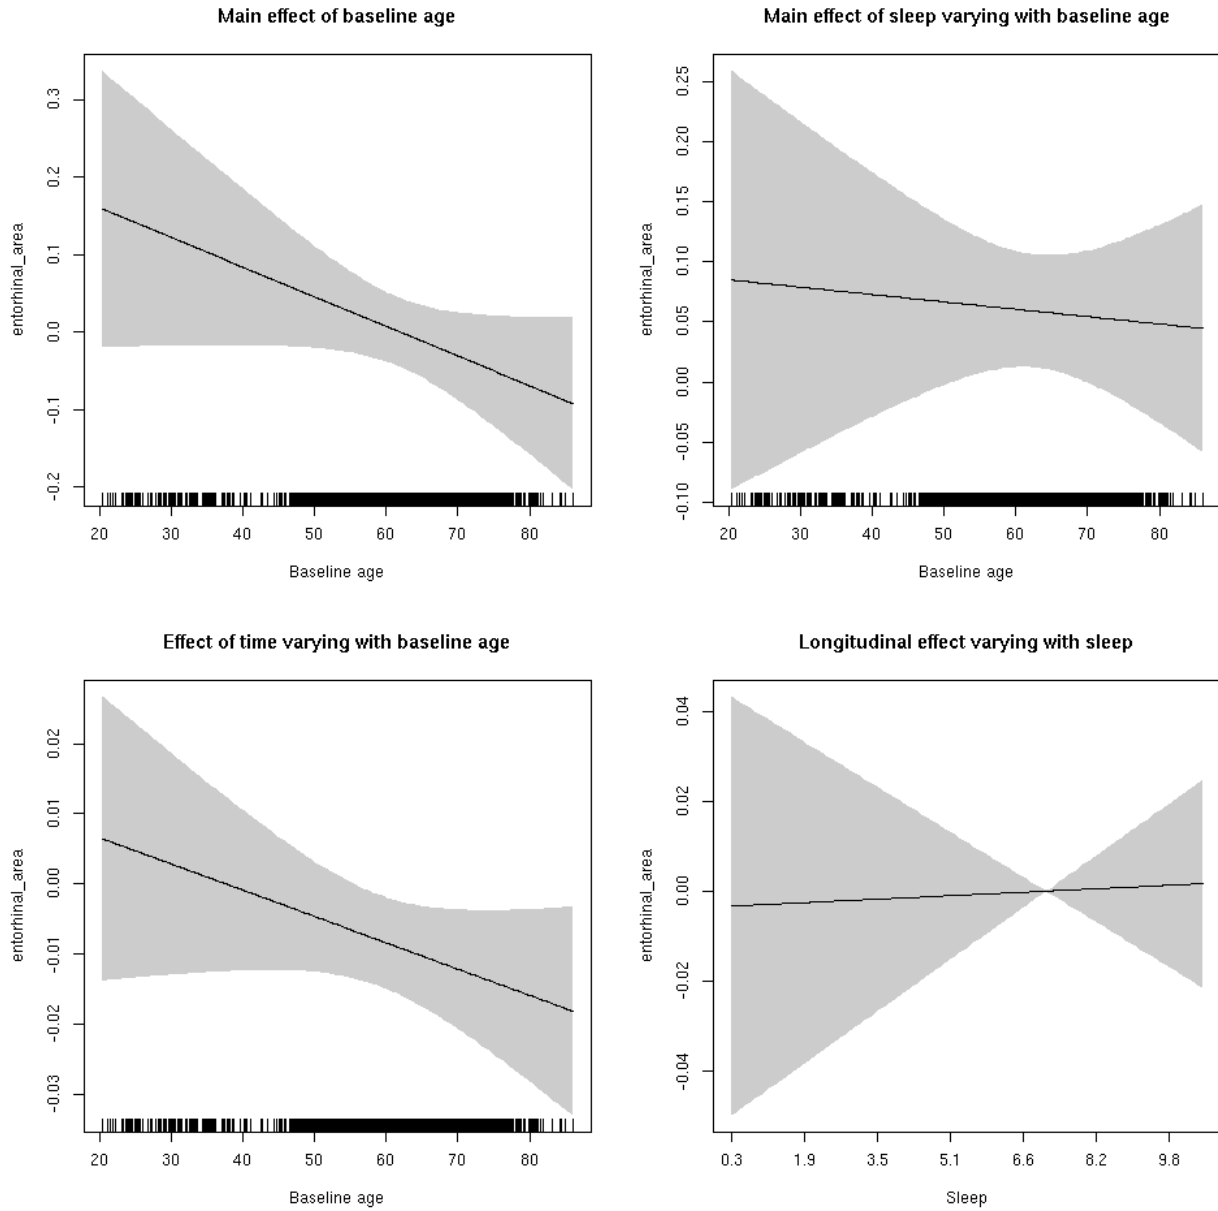

## entorhinal\_area

**Full data** Below is the model output. The term `s(sleep_z):time` is probably what we care most about.

```
##
## Family: gaussian
## Link function: identity
##
## Formula:
## value ~ sex + site + icv + s(bl_age, k = 10, bs = "cr") + s(bl_age,
##   by = sleep_z, bs = "cr") + +s(bl_age, by = time, k = 5, bs = "cr") +
##   s(sleep_z, by = time, k = 5, bs = "cr", pc = 0)
## <environment: 0x5630035aedb8>
```

```

##
## Parametric coefficients:
##           Estimate Std. Error t value Pr(>|t|)
## (Intercept)  0.34342   0.06622   5.186 2.20e-07 ***
## sexmale      0.17789   0.03439   5.173 2.36e-07 ***
## siteousAvanto -0.44460   0.08184  -5.433 5.71e-08 ***
## siteousPrisma -1.05135   0.21528  -4.884 1.06e-06 ***
## siteousSkyra  -0.61598   0.07914  -7.783 7.93e-15 ***
## siteUB       -0.67471   0.15356  -4.394 1.13e-05 ***
## siteUCAM     -0.56238   0.08237  -6.828 9.24e-12 ***
## siteUKB     -0.41371   0.06166  -6.710 2.08e-11 ***
## siteUmU     -0.81148   0.09498  -8.544 < 2e-16 ***
## icv         0.35021   0.01696  20.655 < 2e-16 ***
## ---
## Signif. codes:  0 '***' 0.001 '**' 0.01 '*' 0.05 '.' 0.1 ' ' 1
##
## Approximate significance of smooth terms:
##           edf Ref.df      F  p-value
## s(bl_age)      1      1  2.155   0.142
## s(bl_age):sleep_z  2      2  2.263   0.104
## s(bl_age):time    2      2 15.187 6.63e-07 ***
## s(sleep_z):time   1      1  0.140   0.708
## ---
## Signif. codes:  0 '***' 0.001 '**' 0.01 '*' 0.05 '.' 0.1 ' ' 1
##
## R-sq.(adj) =  0.187
## lmer.REML = 13534 Scale est. = 0.067556 n = 8176

```

Below are plots of a plot of  $s(\text{bl\_age})$ ,  $s(\text{bl\_age}):\text{sleep\_z}$ ,  $s(\text{bl\_age}):\text{time}$ , and  $s(\text{sleep\_z}):\text{time}$ . For  $s(\text{sleep\_z}):\text{time}$ , roughly, if we cannot fit a straight line through the confidence bands, there is evidence that the effect of time depends on sleep duration. It is correct that the confidence interval is zero at one point along the axis; this happens because we do not include the main effect.

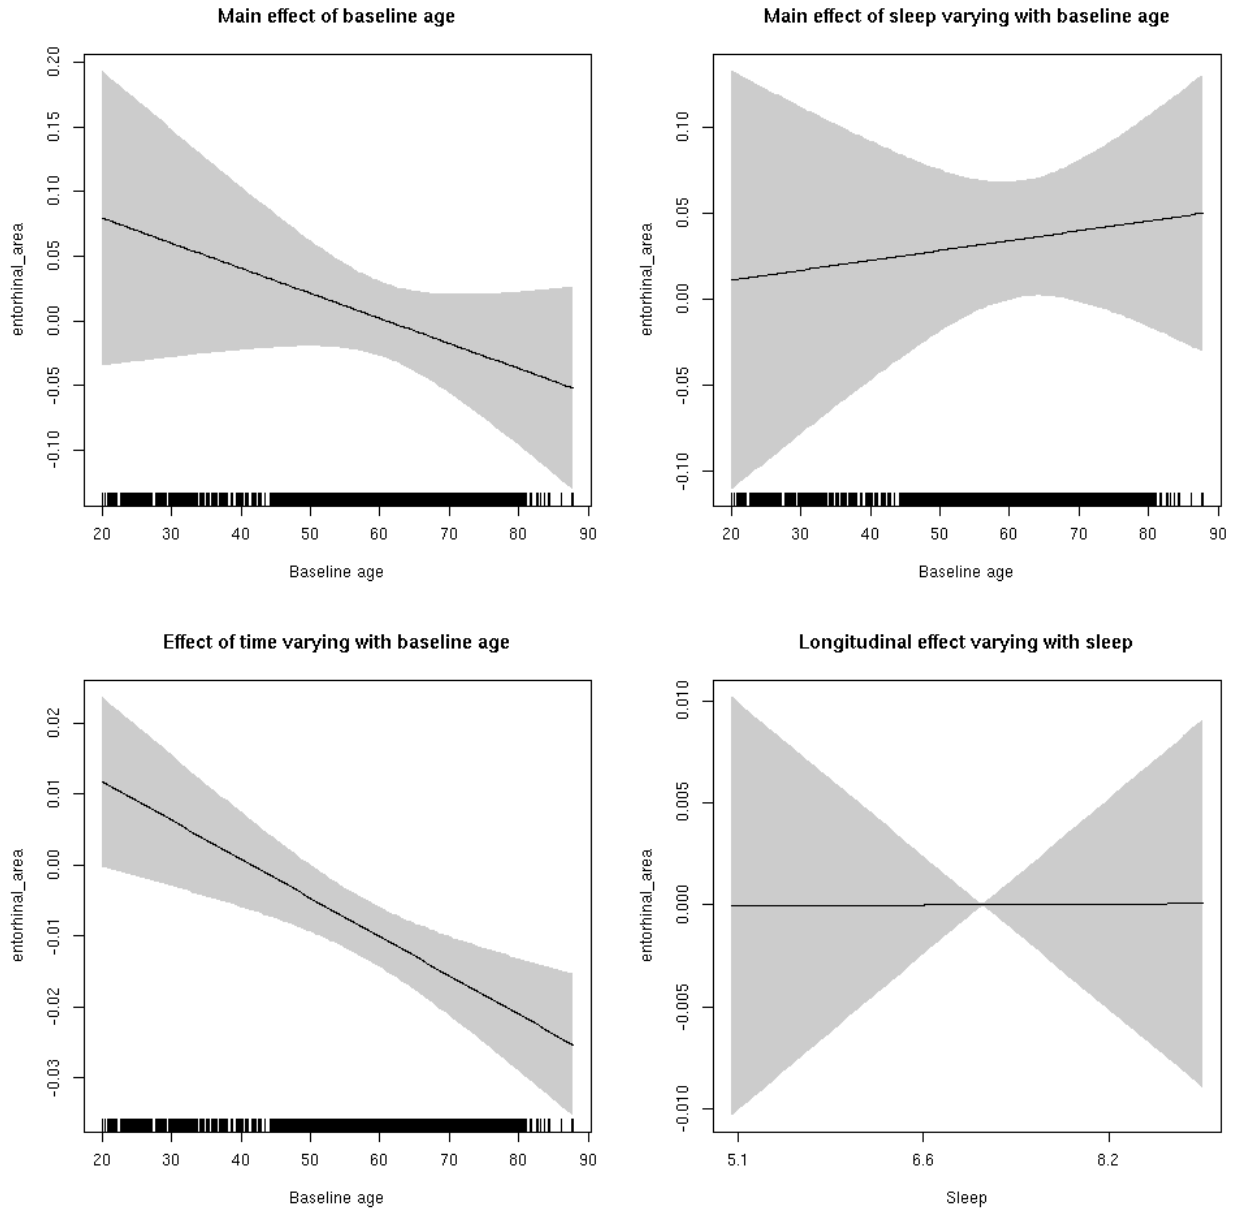

**Restricted to sleep  $\geq 5$  and  $\leq 9$  hours** Below is the row for `s(sleep_z):time` from the model output.

```
## s(sleep_z):time      1      1 0.000  0.990
```

Below are plots of a plot of `s(bl_age)`, `s(bl_age):sleep_z`, `s(bl_age):time`, and `s(sleep_z):time`. For `s(sleep_z):time`, roughly, if we cannot fit a straight line through the confidence bands, there is evidence that the effect of time depends on sleep duration. It is correct that the confidence interval is zero at one point along the axis; this happens because we do not include the main effect.

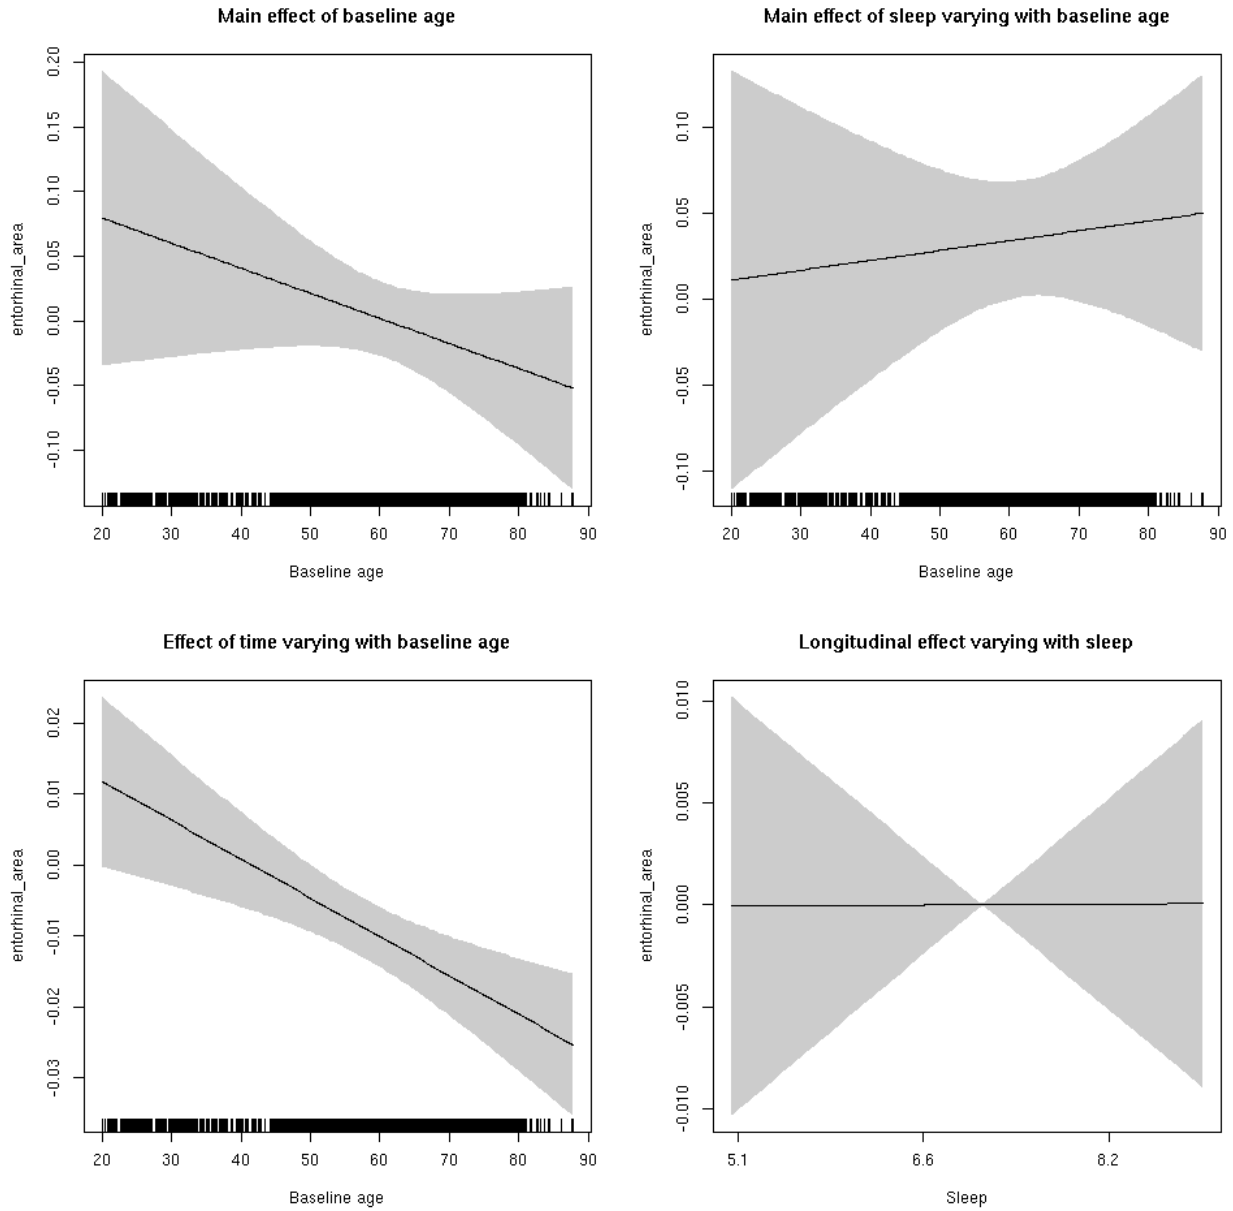

## entorhinal\_thickness: Stratified by sex

**Female: Full data** Below is the row for `s(sleep_z):time` from the model output.

```
## s(sleep_z):time  1.000  1.000  0.255  0.614
```

Below are plots of a plot of `s(bl_age)`, `s(bl_age):sleep_z`, `s(bl_age):time`, and `s(sleep_z):time`. For `s(sleep_z):time`, roughly, if we cannot fit a straight line through the confidence bands, there is evidence that the effect of time depends on sleep duration. It is correct that the confidence interval is zero at one point along the axis; this happens because we do not include the main effect.

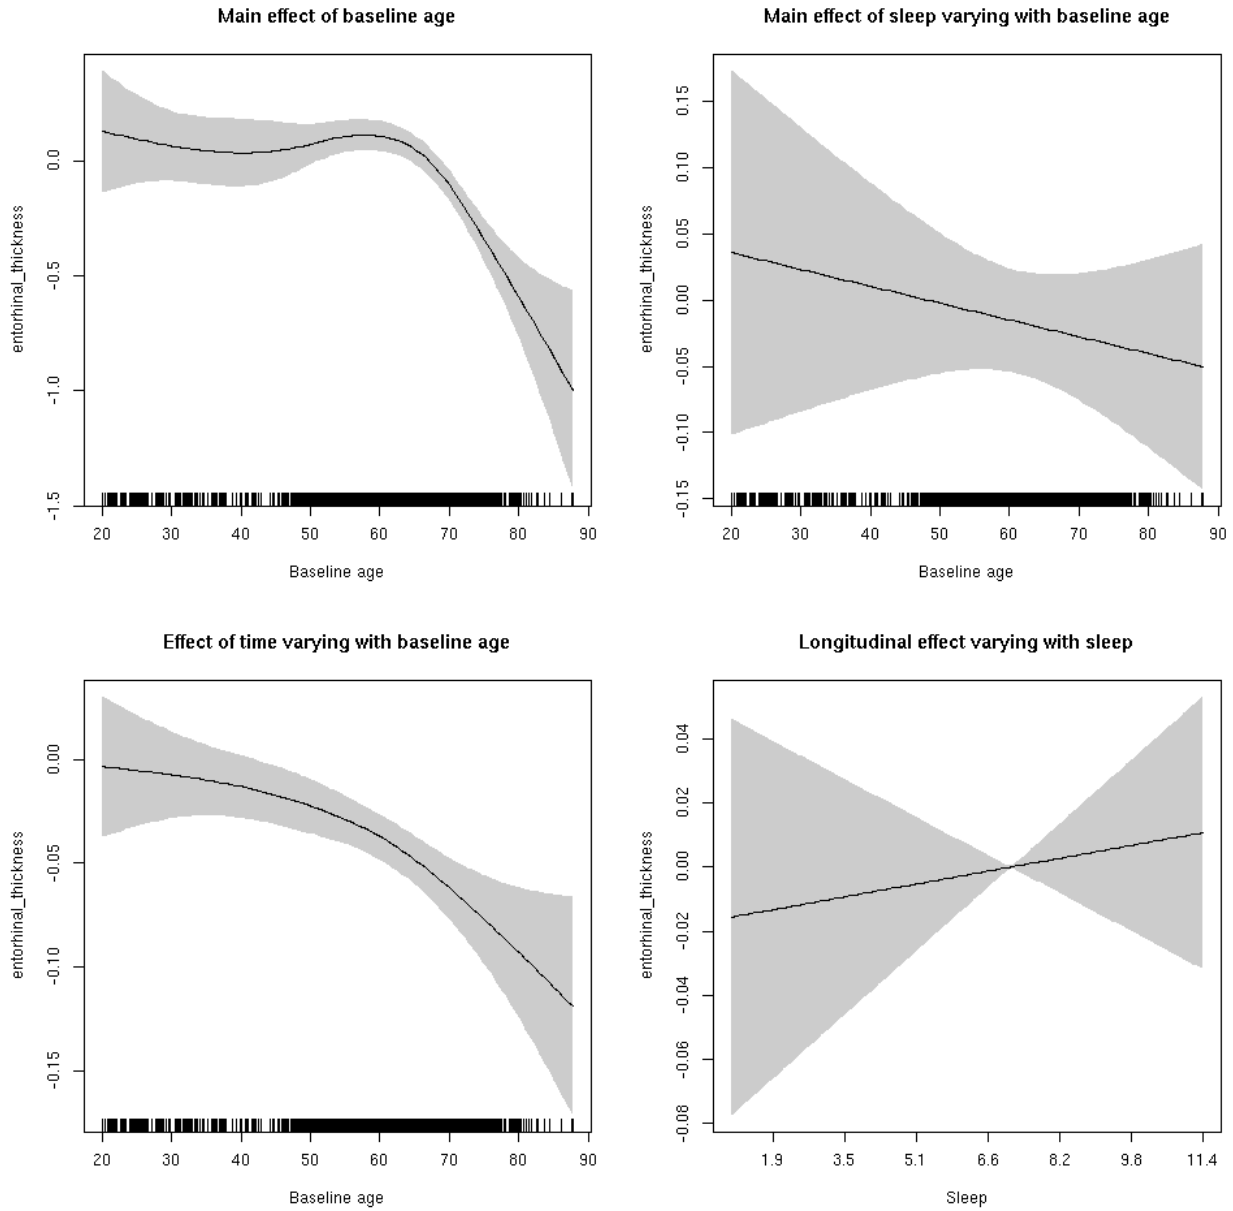

**Male: Full data** Below is the row for `s(sleep_z):time` from the model output.

```
## s(sleep_z):time  1.000  1.000  4.249  0.0393 *
```

Below are plots of a plot of `s(bl_age)`, `s(bl_age):sleep_z`, `s(bl_age):time`, and `s(sleep_z):time`. For `s(sleep_z):time`, roughly, if we cannot fit a straight line through the confidence bands, there is evidence that the effect of time depends on sleep duration. It is correct that the confidence interval is zero at one point along the axis; this happens because we do not include the main effect.

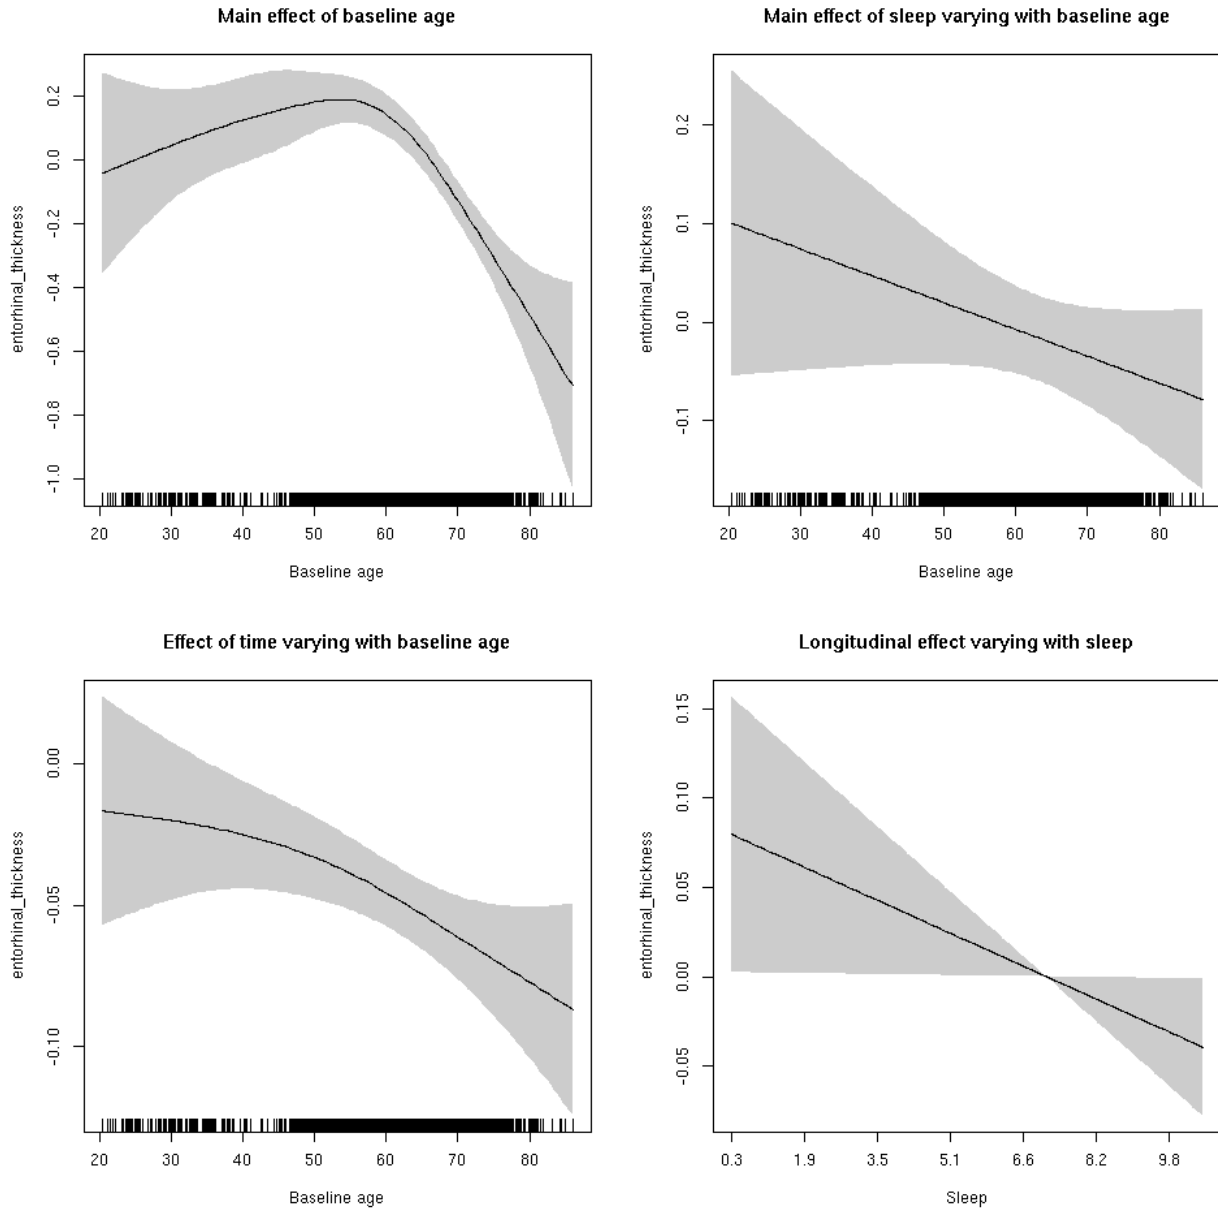

## entorhinal\_thickness

**Full data** Below is the model output. The term `s(sleep_z):time` is probably what we care most about.

```
##
## Family: gaussian
## Link function: identity
##
## Formula:
## value ~ sex + site + s(bl_age, k = 10, bs = "cr") + s(bl_age,
##   by = sleep_z, bs = "cr") + +s(bl_age, by = time, k = 5, bs = "cr") +
##   s(sleep_z, by = time, k = 5, bs = "cr", pc = 0)
## <environment: 0x5630035d31b8>
```



```

##
## Parametric coefficients:
##           Estimate Std. Error t value Pr(>|t|)
## (Intercept) -0.21420    0.05431  -3.944 8.07e-05 ***
## sexmale     -0.01917    0.02717  -0.706  0.48035
## siteousAvanto  0.20849    0.07260   2.872  0.00409 **
## siteousPrisma -0.31946    0.34339  -0.930  0.35224
## siteousSkyra  0.19631    0.07257   2.705  0.00685 **
## siteUB       0.18476    0.14316   1.291  0.19689
## siteUCAM     0.01461    0.07486   0.195  0.84530
## siteUKB      0.35445    0.05507   6.436 1.29e-10 ***
## siteUmU     -0.15978    0.08940  -1.787  0.07395 .
## ---
## Signif. codes:  0 '***' 0.001 '**' 0.01 '*' 0.05 '.' 0.1 ' ' 1
##
## Approximate significance of smooth terms:
##           edf Ref.df      F p-value
## s(bl_age)      4.241  4.241 33.476 <2e-16 ***
## s(bl_age):sleep_z 2.000  2.000  1.924  0.146
## s(bl_age):time  2.980  2.980 55.249 <2e-16 ***
## s(sleep_z):time  1.000  1.000  1.073  0.300
## ---
## Signif. codes:  0 '***' 0.001 '**' 0.01 '*' 0.05 '.' 0.1 ' ' 1
##
## R-sq.(adj) =  0.0789
## lmer.REML = 17963 Scale est. = 0.20939 n = 8166

```

Below are plots of a plot of `s(bl_age)`, `s(bl_age):sleep_z`, `s(bl_age):time`, and `s(sleep_z):time`. For `s(sleep_z):time`, roughly, if we cannot fit a straight line through the confidence bands, there is evidence that the effect of time depends on sleep duration. It is correct that the confidence interval is zero at one point along the axis; this happens because we do not include the main effect.

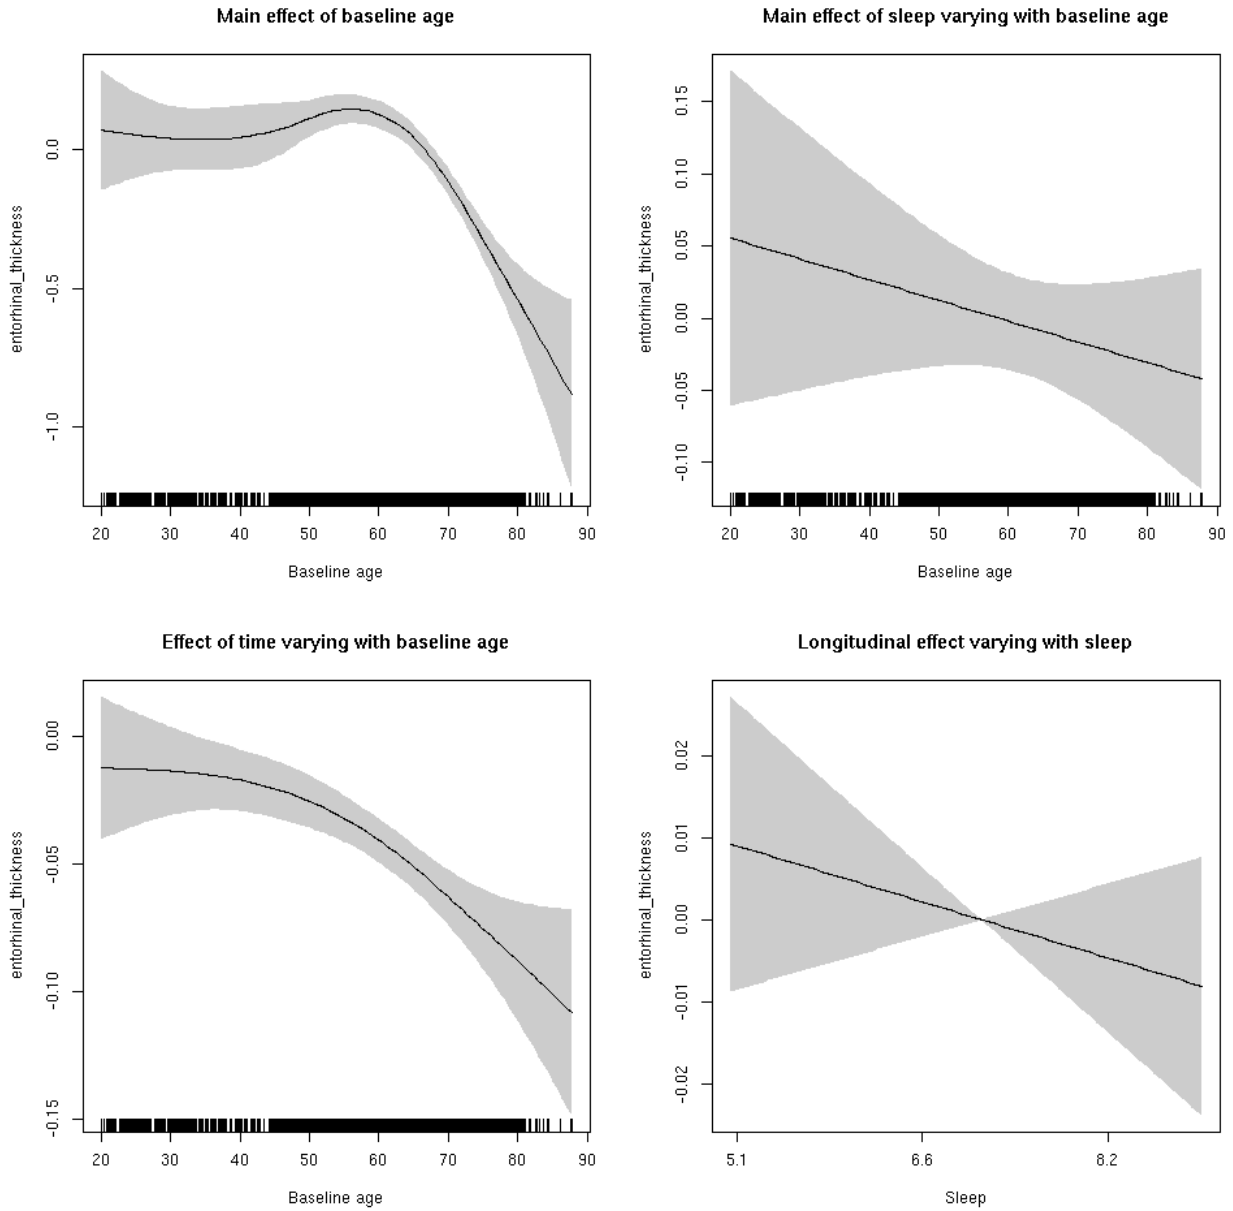

**Restricted to sleep  $\geq 5$  and  $\leq 9$  hours** Below is the row for `s(sleep_z):time` from the model output.

```
## s(sleep_z):time 1.000 1.000 1.056 0.304
```

Below are plots of a plot of `s(bl_age)`, `s(bl_age):sleep_z`, `s(bl_age):time`, and `s(sleep_z):time`. For `s(sleep_z):time`, roughly, if we cannot fit a straight line through the confidence bands, there is evidence that the effect of time depends on sleep duration. It is correct that the confidence interval is zero at one point along the axis; this happens because we do not include the main effect.

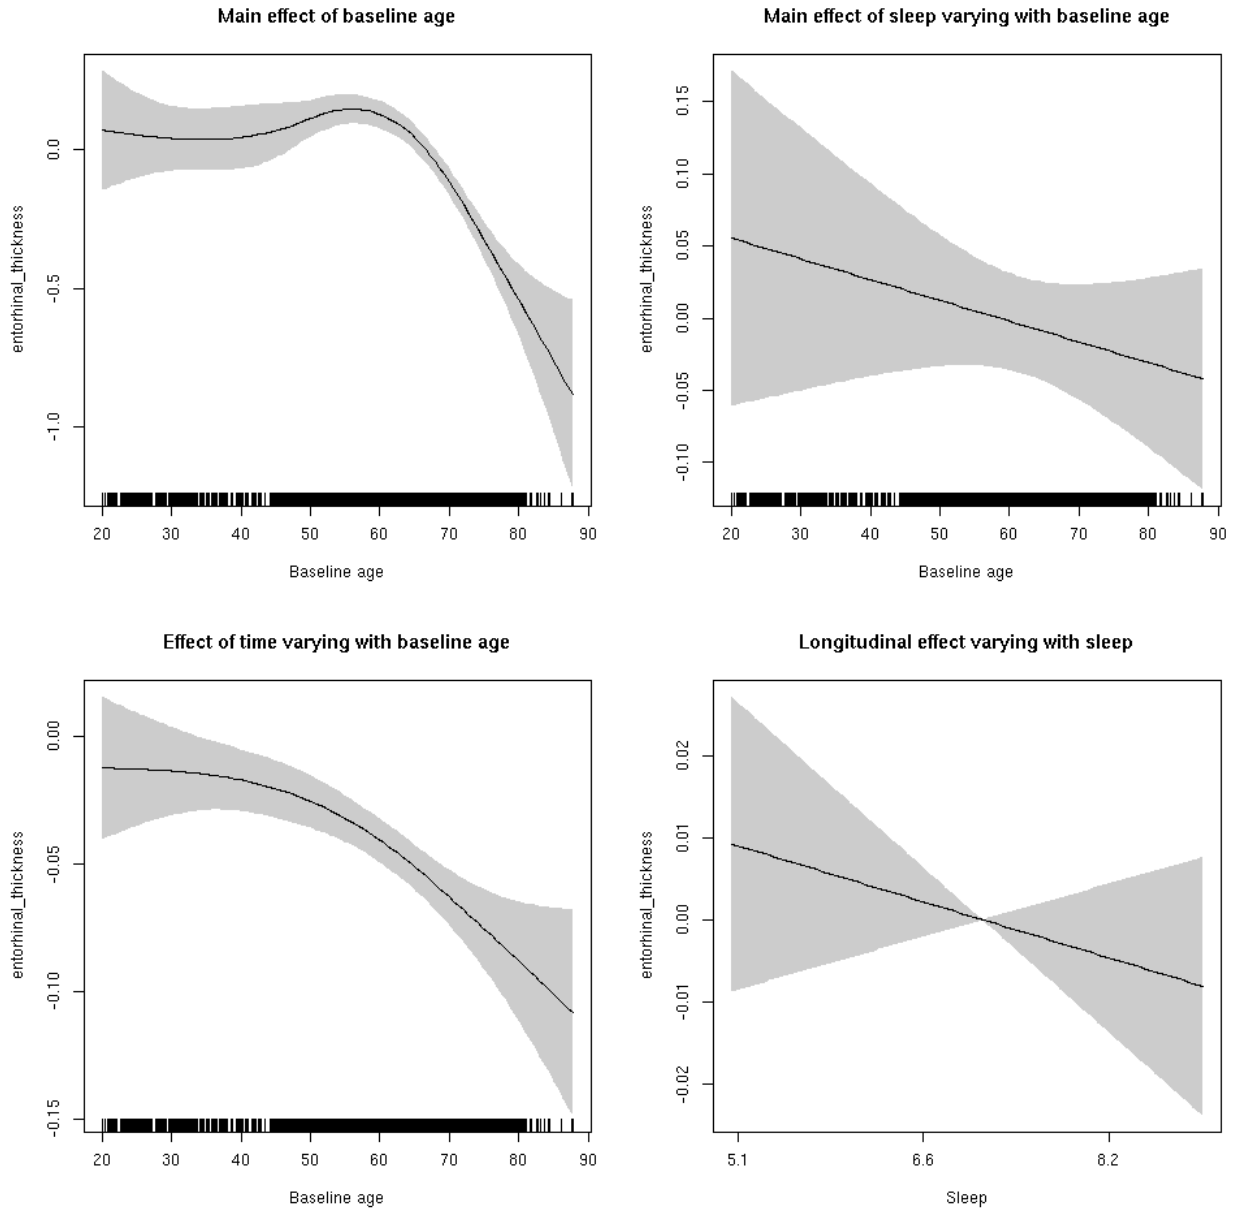

## entorhinal\_volume: Stratified by sex

**Female: Full data** Below is the row for `s(sleep_z):time` from the model output.

```
## s(sleep_z):time  1.000  1.000  0.084  0.7723
```

Below are plots of a plot of `s(bl_age)`, `s(bl_age):sleep_z`, `s(bl_age):time`, and `s(sleep_z):time`. For `s(sleep_z):time`, roughly, if we cannot fit a straight line through the confidence bands, there is evidence that the effect of time depends on sleep duration. It is correct that the confidence interval is zero at one point along the axis; this happens because we do not include the main effect.

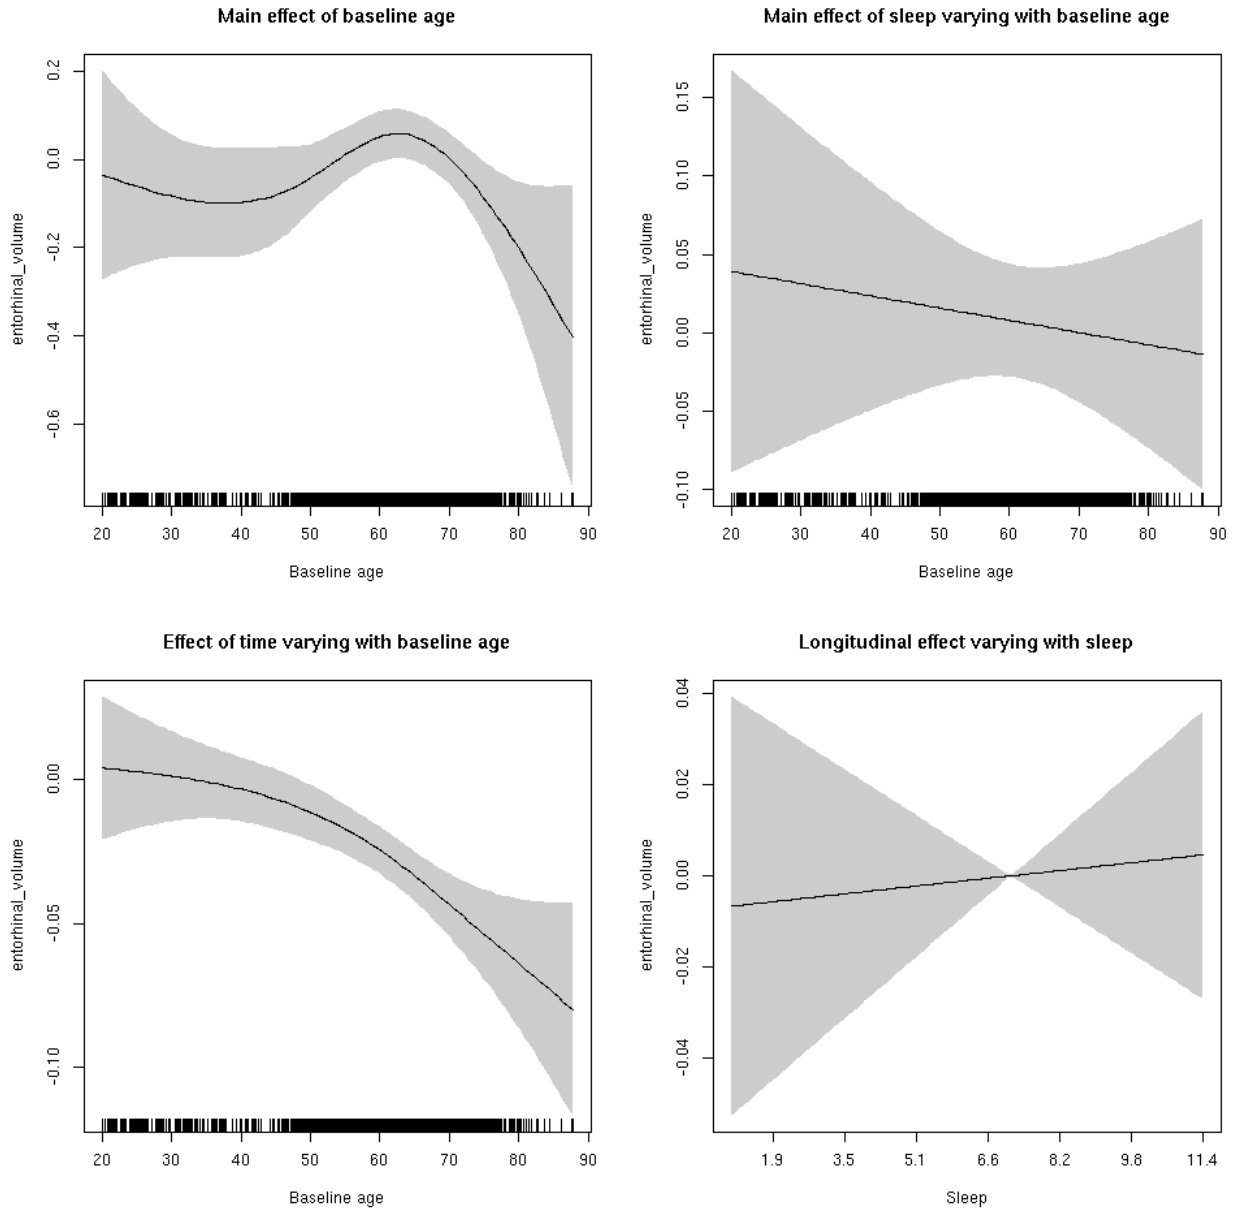

**Male: Full data** Below is the row for `s(sleep_z):time` from the model output.

```
## s(sleep_z):time  1.000  1.000  4.147  0.041786 *
```

Below are plots of a plot of `s(bl_age)`, `s(bl_age):sleep_z`, `s(bl_age):time`, and `s(sleep_z):time`. For `s(sleep_z):time`, roughly, if we cannot fit a straight line through the confidence bands, there is evidence that the effect of time depends on sleep duration. It is correct that the confidence interval is zero at one point along the axis; this happens because we do not include the main effect.

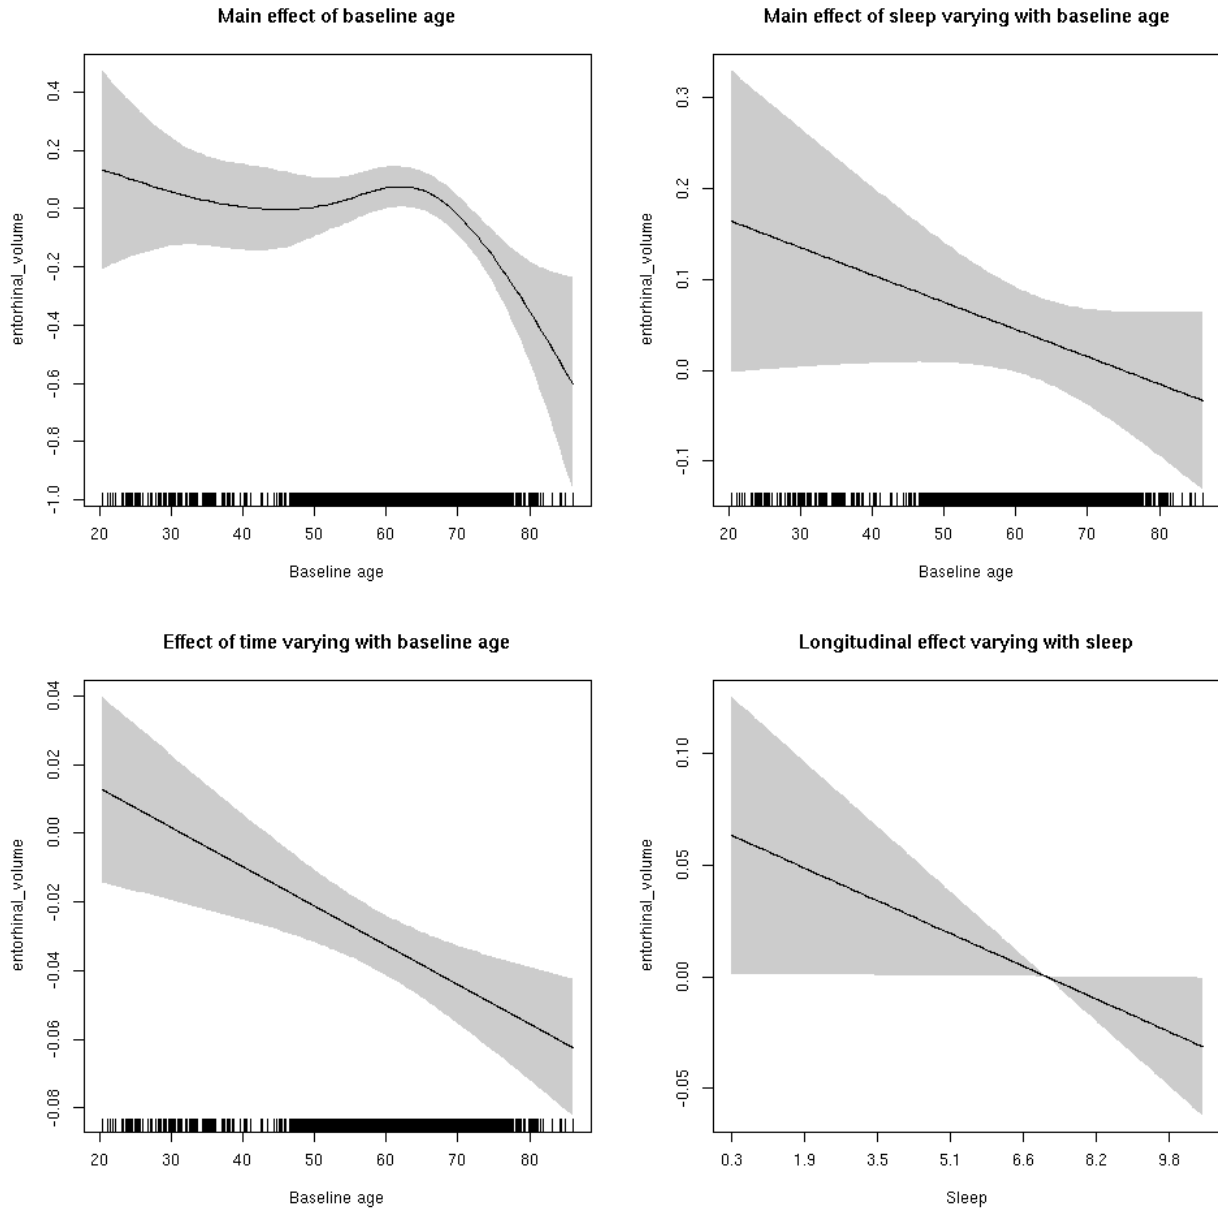

## entorhinal\_volume

**Full data** Below is the model output. The term `s(sleep_z):time` is probably what we care most about.

```
##
## Family: gaussian
## Link function: identity
##
## Formula:
## value ~ sex + site + icv + s(bl_age, k = 10, bs = "cr") + s(bl_age,
##   by = sleep_z, bs = "cr") + +s(bl_age, by = time, k = 5, bs = "cr") +
##   s(sleep_z, by = time, k = 5, bs = "cr", pc = 0)
## <environment: 0x5630035a4ed0>
```

```

##
## Parametric coefficients:
##           Estimate Std. Error t value Pr(>|t|)
## (Intercept)  0.54969   0.06459   8.511 < 2e-16 ***
## sexmale      0.18553   0.03311   5.604 2.17e-08 ***
## siteousAvanto -0.05028  0.07963  -0.631 0.52778
## siteousPrisma -0.88432  0.27736  -3.188 0.00144 **
## siteousSkyra  -0.38943  0.07708  -5.052 4.47e-07 ***
## siteUB       -0.36469  0.14694  -2.482 0.01309 *
## siteUCAM     -0.35548  0.08027  -4.429 9.60e-06 ***
## siteUKB      -0.59700  0.06135  -9.730 < 2e-16 ***
## siteUmU      -0.57627  0.09184  -6.275 3.68e-10 ***
## icv          0.30857   0.01640  18.819 < 2e-16 ***
## ---
## Signif. codes:  0 '***' 0.001 '**' 0.01 '*' 0.05 '.' 0.1 ' ' 1
##
## Approximate significance of smooth terms:
##           edf Ref.df    F  p-value
## s(bl_age)      4.133  4.133  8.038 9.77e-07 ***
## s(bl_age):sleep_z 2.000  2.000  2.076  0.126
## s(bl_age):time  2.954  2.954 44.226 < 2e-16 ***
## s(sleep_z):time  1.000  1.000  1.291  0.256
## ---
## Signif. codes:  0 '***' 0.001 '**' 0.01 '*' 0.05 '.' 0.1 ' ' 1
##
## R-sq.(adj) =  0.177
## lmer.REML = 15844  Scale est. = 0.12487  n = 8176

```

Below are plots of a plot of  $s(\text{bl\_age})$ ,  $s(\text{bl\_age}):\text{sleep\_z}$ ,  $s(\text{bl\_age}):\text{time}$ , and  $s(\text{sleep\_z}):\text{time}$ . For  $s(\text{sleep\_z}):\text{time}$ , roughly, if we cannot fit a straight line through the confidence bands, there is evidence that the effect of time depends on sleep duration. It is correct that the confidence interval is zero at one point along the axis; this happens because we do not include the main effect.

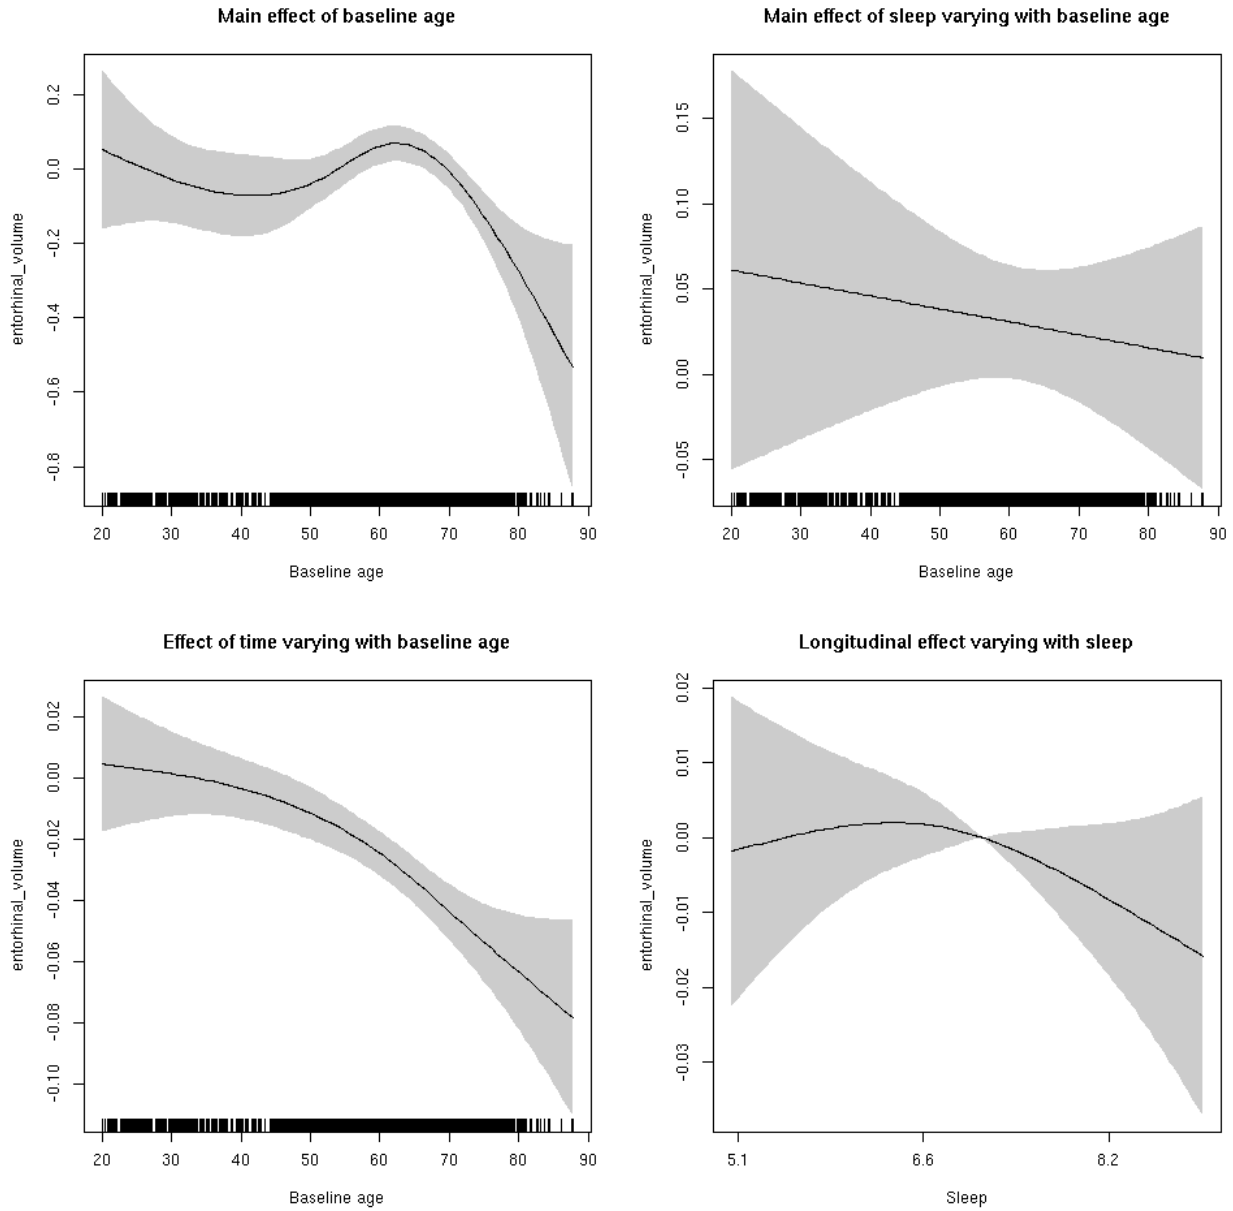

**Restricted to sleep  $\geq 5$  and  $\leq 9$  hours** Below is the row for `s(sleep_z):time` from the model output.

```
## s(sleep_z):time  1.648  1.648  0.754   0.303
```

Below are plots of a plot of `s(bl_age)`, `s(bl_age):sleep_z`, `s(bl_age):time`, and `s(sleep_z):time`. For `s(sleep_z):time`, roughly, if we cannot fit a straight line through the confidence bands, there is evidence that the effect of time depends on sleep duration. It is correct that the confidence interval is zero at one point along the axis; this happens because we do not include the main effect.

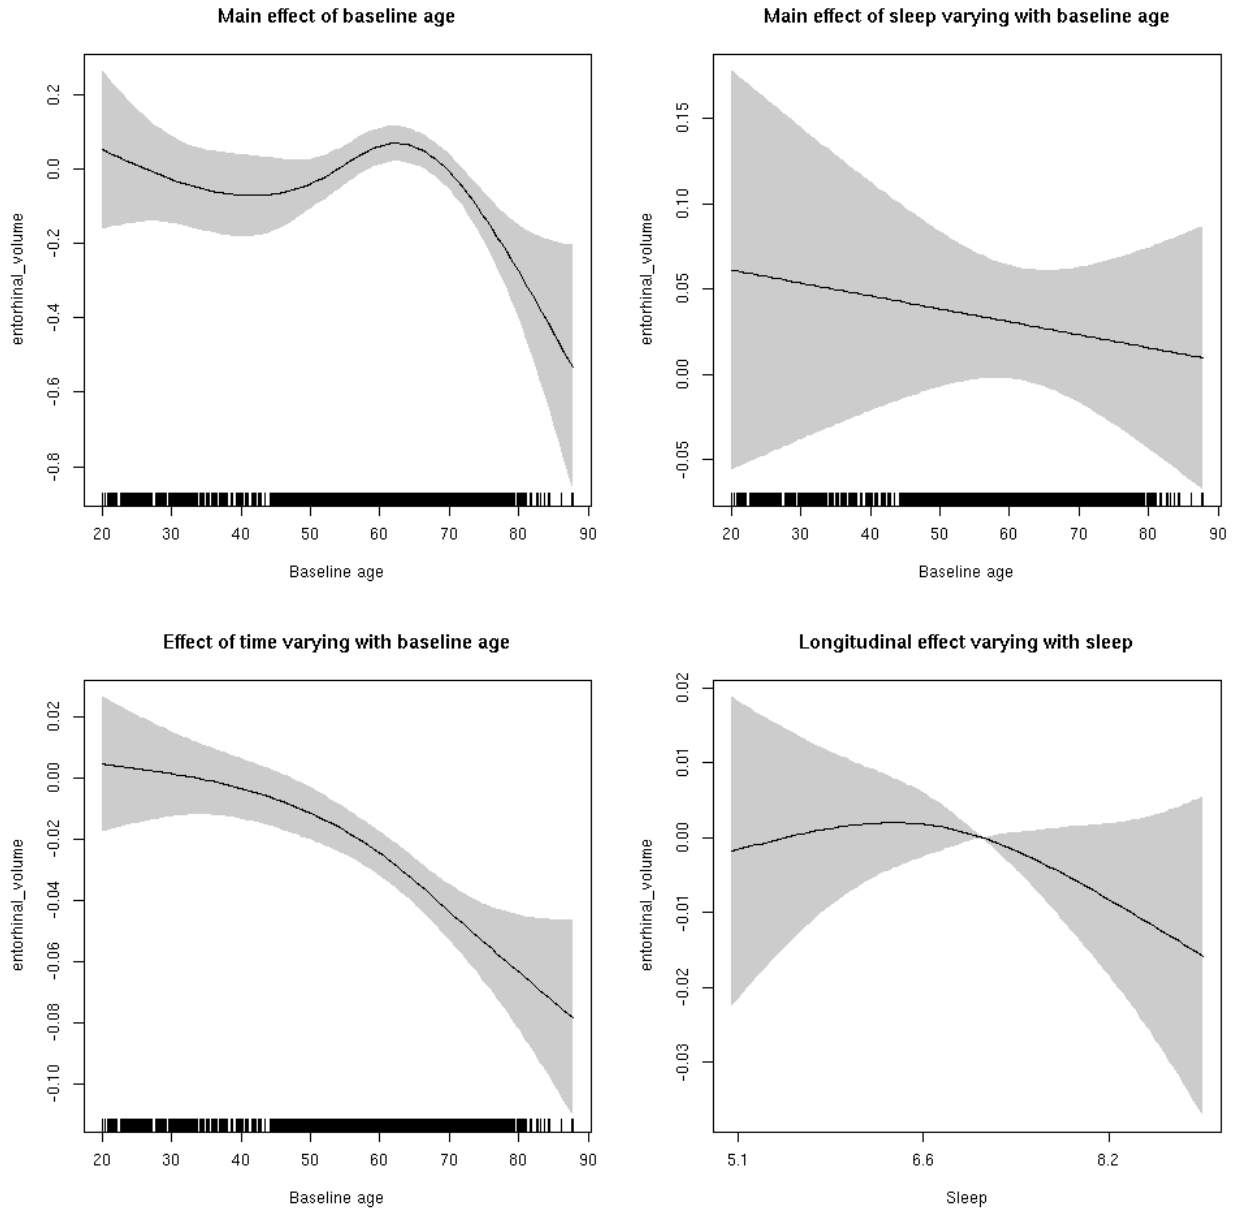

## frontalpole\_area: Stratified by sex

**Female: Full data** Below is the row for `s(sleep_z):time` from the model output.

```
## s(sleep_z):time  1.00  1.00  0.056  0.812
```

Below are plots of a plot of `s(bl_age)`, `s(bl_age):sleep_z`, `s(bl_age):time`, and `s(sleep_z):time`. For `s(sleep_z):time`, roughly, if we cannot fit a straight line through the confidence bands, there is evidence that the effect of time depends on sleep duration. It is correct that the confidence interval is zero at one point along the axis; this happens because we do not include the main effect.



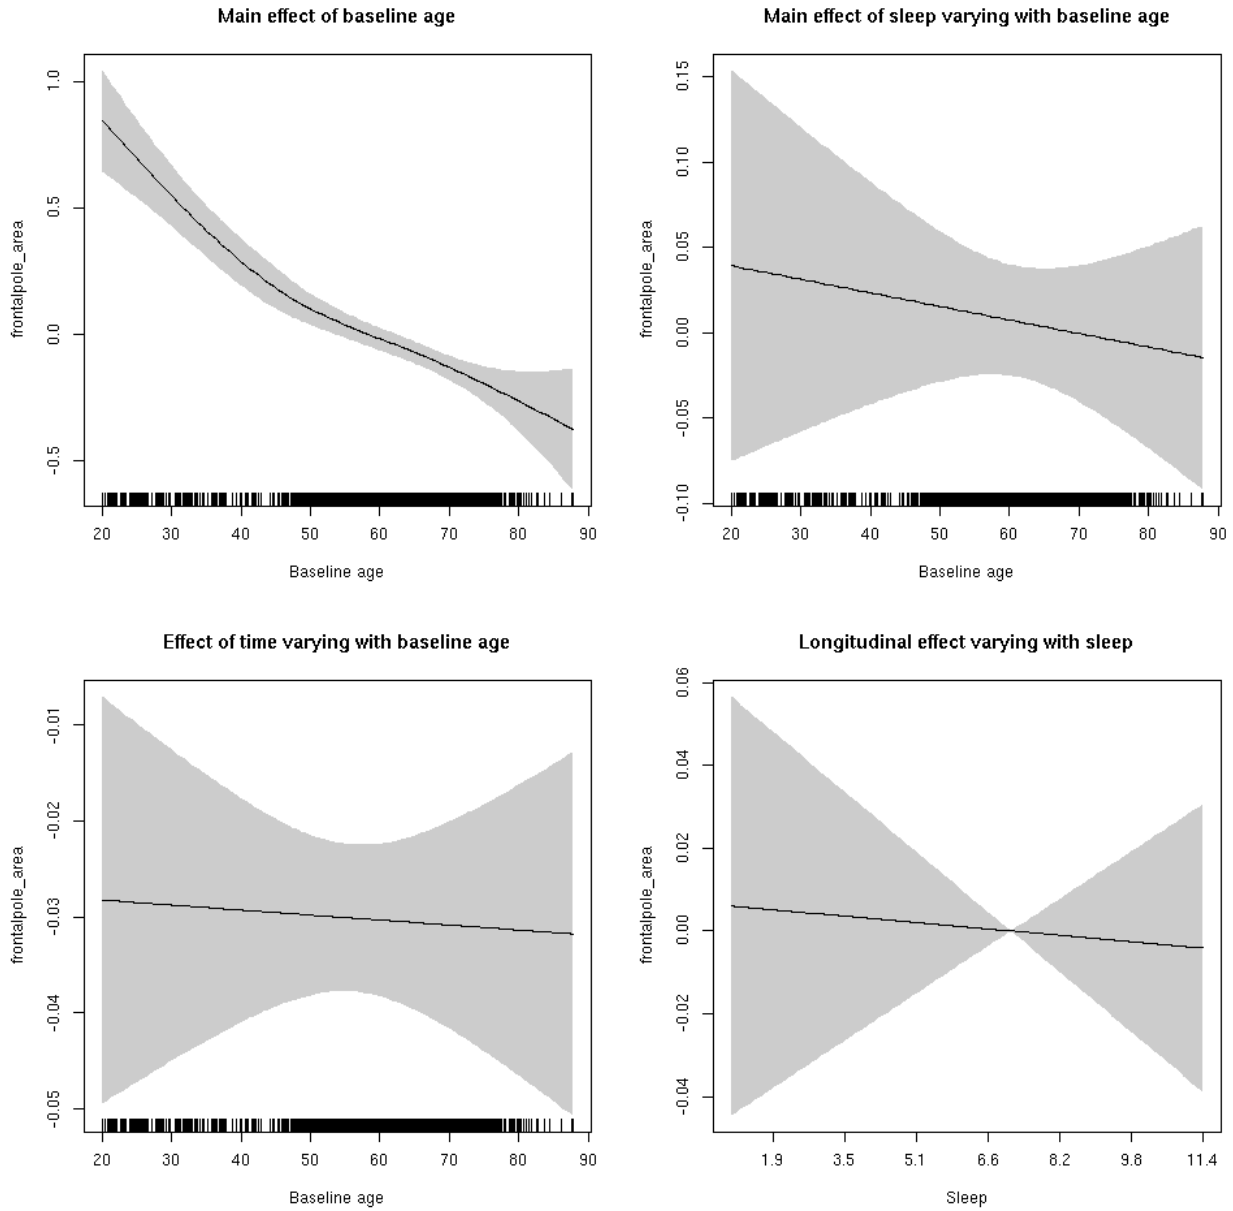

**Male: Full data** Below is the row for `s(sleep_z):time` from the model output.

```
## s(sleep_z):time  1.000  1.000  0.416  0.5189
```

Below are plots of a plot of `s(bl_age)`, `s(bl_age):sleep_z`, `s(bl_age):time`, and `s(sleep_z):time`. For `s(sleep_z):time`, roughly, if we cannot fit a straight line through the confidence bands, there is evidence that the effect of time depends on sleep duration. It is correct that the confidence interval is zero at one point along the axis; this happens because we do not include the main effect.

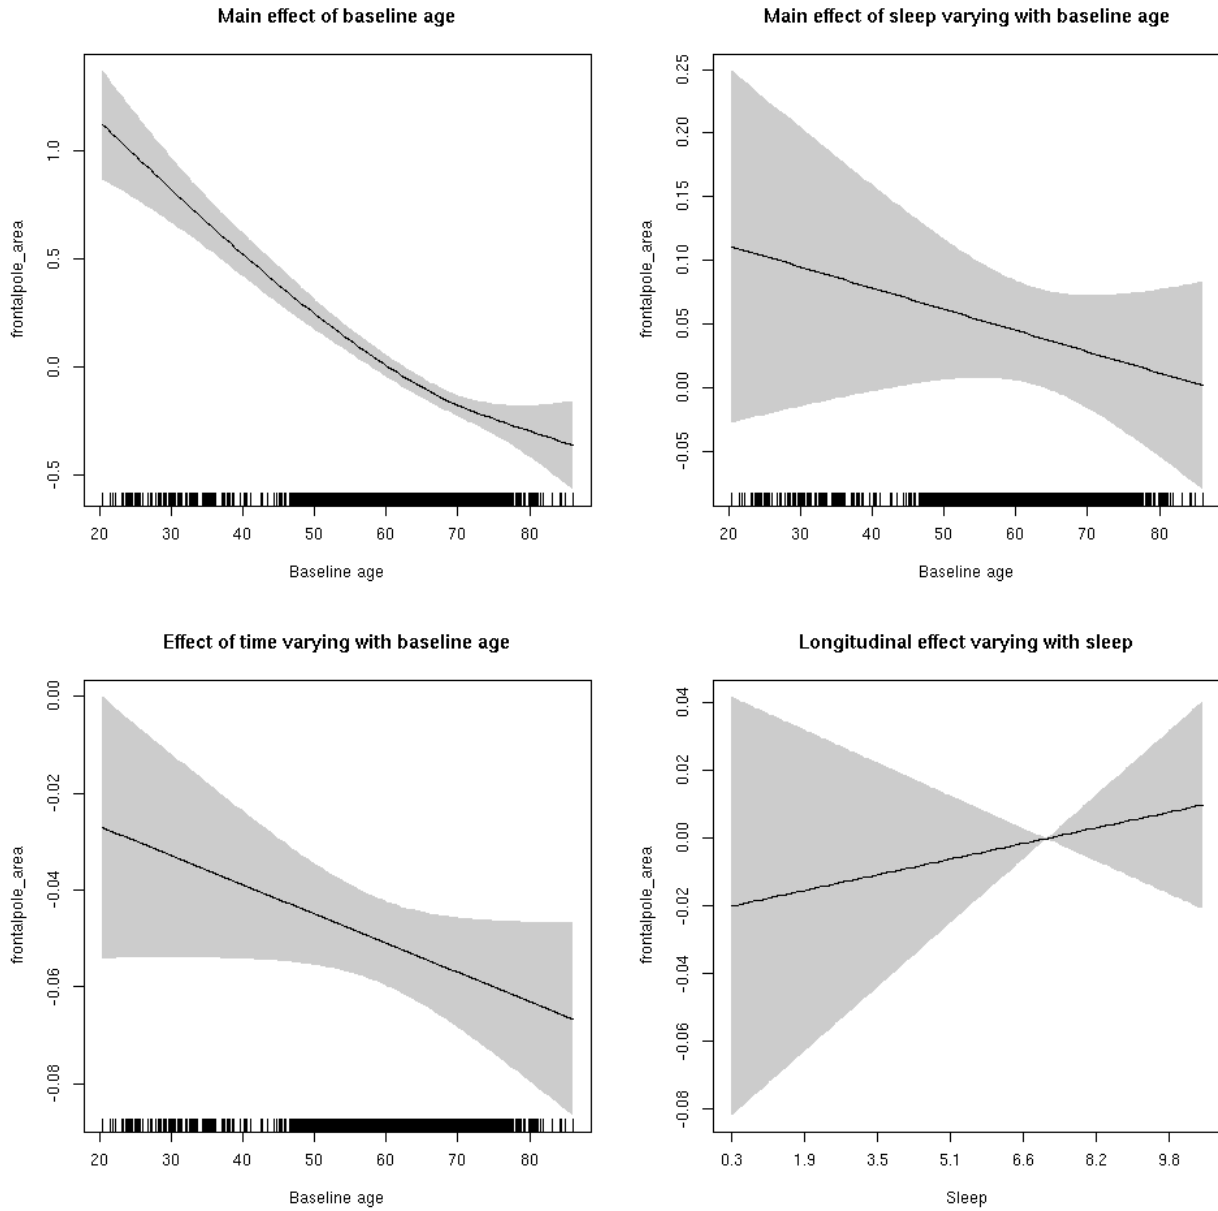

## frontalpole\_area

**Full data** Below is the model output. The term `s(sleep_z):time` is probably what we care most about.

```
##
## Family: gaussian
## Link function: identity
##
## Formula:
## value ~ sex + site + icv + s(bl_age, k = 10, bs = "cr") + s(bl_age,
##   by = sleep_z, bs = "cr") + +s(bl_age, by = time, k = 5, bs = "cr") +
##   s(sleep_z, by = time, k = 5, bs = "cr", pc = 0)
## <environment: 0x5630035a1ae8>
```

```

##
## Parametric coefficients:
##           Estimate Std. Error t value Pr(>|t|)
## (Intercept)  1.20705    0.05554  21.733 < 2e-16 ***
## sexmale      0.26855    0.02849   9.427 < 2e-16 ***
## siteousAvanto -0.27266    0.06908  -3.947 7.99e-05 ***
## siteousPrisma -0.34292    0.28339  -1.210  0.226
## siteousSkyra  0.47292    0.06685   7.074 1.62e-12 ***
## siteUB       -0.62984    0.12561  -5.014 5.44e-07 ***
## siteUCAM     -0.86885    0.06852 -12.680 < 2e-16 ***
## siteUKB      -1.32168    0.05249 -25.182 < 2e-16 ***
## siteUmU      0.32791    0.07893   4.154 3.30e-05 ***
## icv          0.41740    0.01412  29.560 < 2e-16 ***
## ---
## Signif. codes:  0 '***' 0.001 '**' 0.01 '*' 0.05 '.' 0.1 ' ' 1
##
## Approximate significance of smooth terms:
##           edf Ref.df      F p-value
## s(bl_age)      2.559  2.559 107.131 <2e-16 ***
## s(bl_age):sleep_z 2.000  2.000   2.033  0.131
## s(bl_age):time  2.000  2.000  95.270 <2e-16 ***
## s(sleep_z):time  1.000  1.000   0.037  0.847
## ---
## Signif. codes:  0 '***' 0.001 '**' 0.01 '*' 0.05 '.' 0.1 ' ' 1
##
## R-sq.(adj) =  0.521
## lmer.REML = 15080 Scale est. = 0.138      n = 8172

```

Below are plots of a plot of  $s(\text{bl\_age})$ ,  $s(\text{bl\_age}):\text{sleep\_z}$ ,  $s(\text{bl\_age}):\text{time}$ , and  $s(\text{sleep\_z}):\text{time}$ . For  $s(\text{sleep\_z}):\text{time}$ , roughly, if we cannot fit a straight line through the confidence bands, there is evidence that the effect of time depends on sleep duration. It is correct that the confidence interval is zero at one point along the axis; this happens because we do not include the main effect.

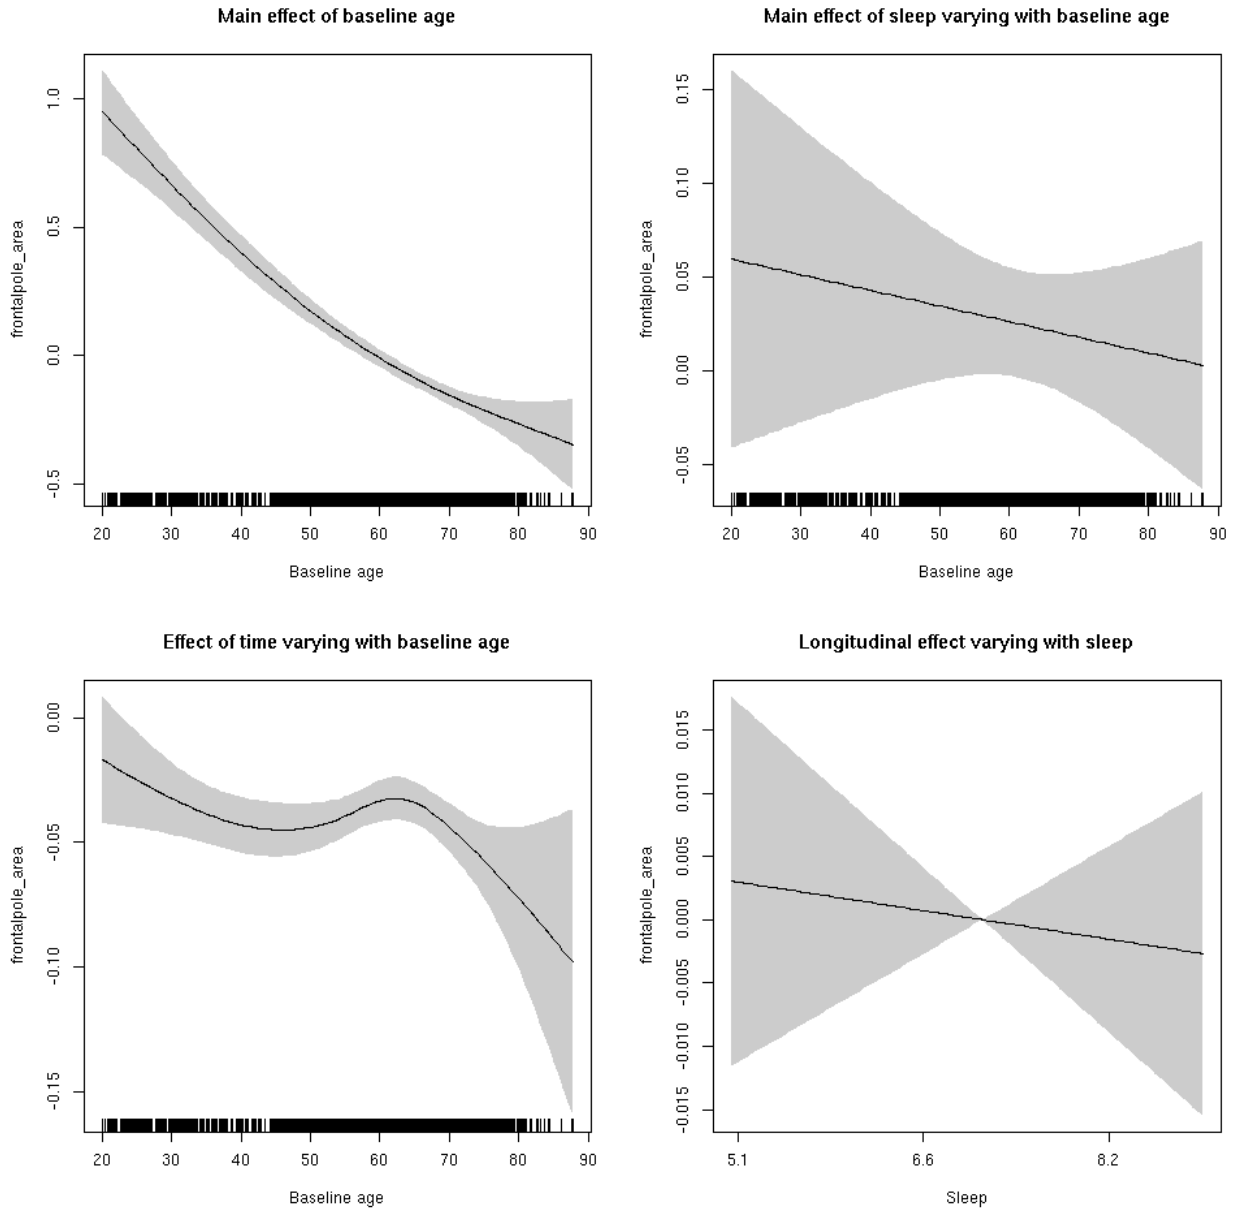

**Restricted to sleep  $\geq 5$  and  $\leq 9$  hours** Below is the row for `s(sleep_z):time` from the model output.

```
## s(sleep_z):time  1.000  1.000  0.175  0.676
```

Below are plots of a plot of `s(bl_age)`, `s(bl_age):sleep_z`, `s(bl_age):time`, and `s(sleep_z):time`. For `s(sleep_z):time`, roughly, if we cannot fit a straight line through the confidence bands, there is evidence that the effect of time depends on sleep duration. It is correct that the confidence interval is zero at one point along the axis; this happens because we do not include the main effect.

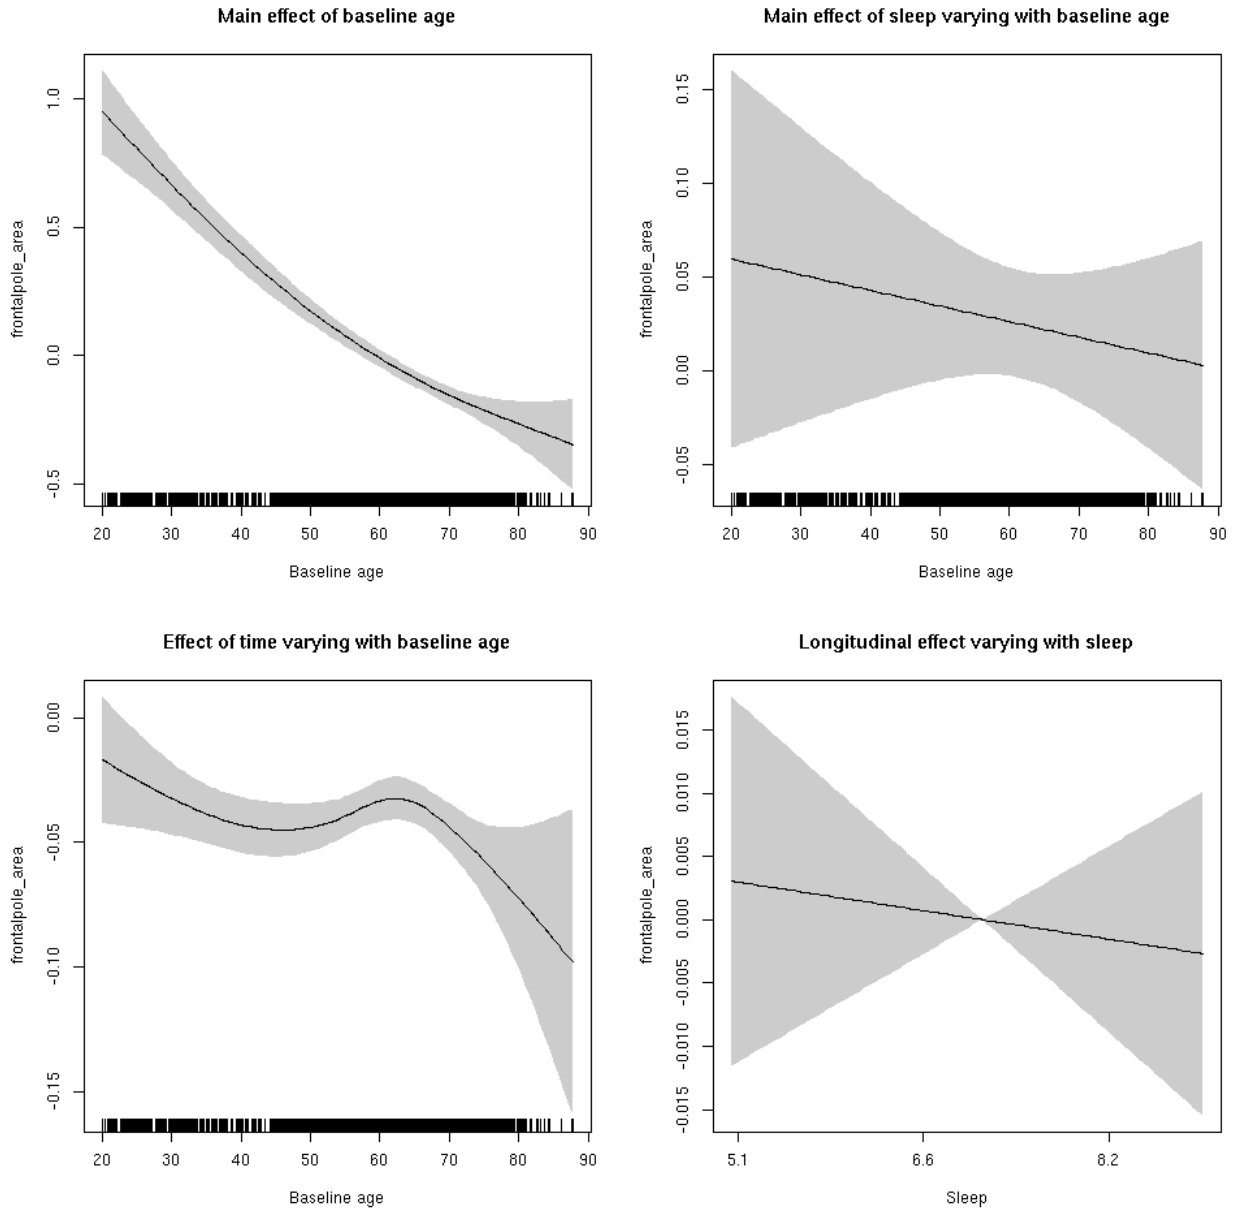

## frontalpole\_thickness: Stratified by sex

**Female: Full data** Below is the row for `s(sleep_z):time` from the model output.

```
## s(sleep_z):time  1.00  1.00  0.027 0.869333
```

Below are plots of a plot of `s(bl_age)`, `s(bl_age):sleep_z`, `s(bl_age):time`, and `s(sleep_z):time`. For `s(sleep_z):time`, roughly, if we cannot fit a straight line through the confidence bands, there is evidence that the effect of time depends on sleep duration. It is correct that the confidence interval is zero at one point along the axis; this happens because we do not include the main effect.

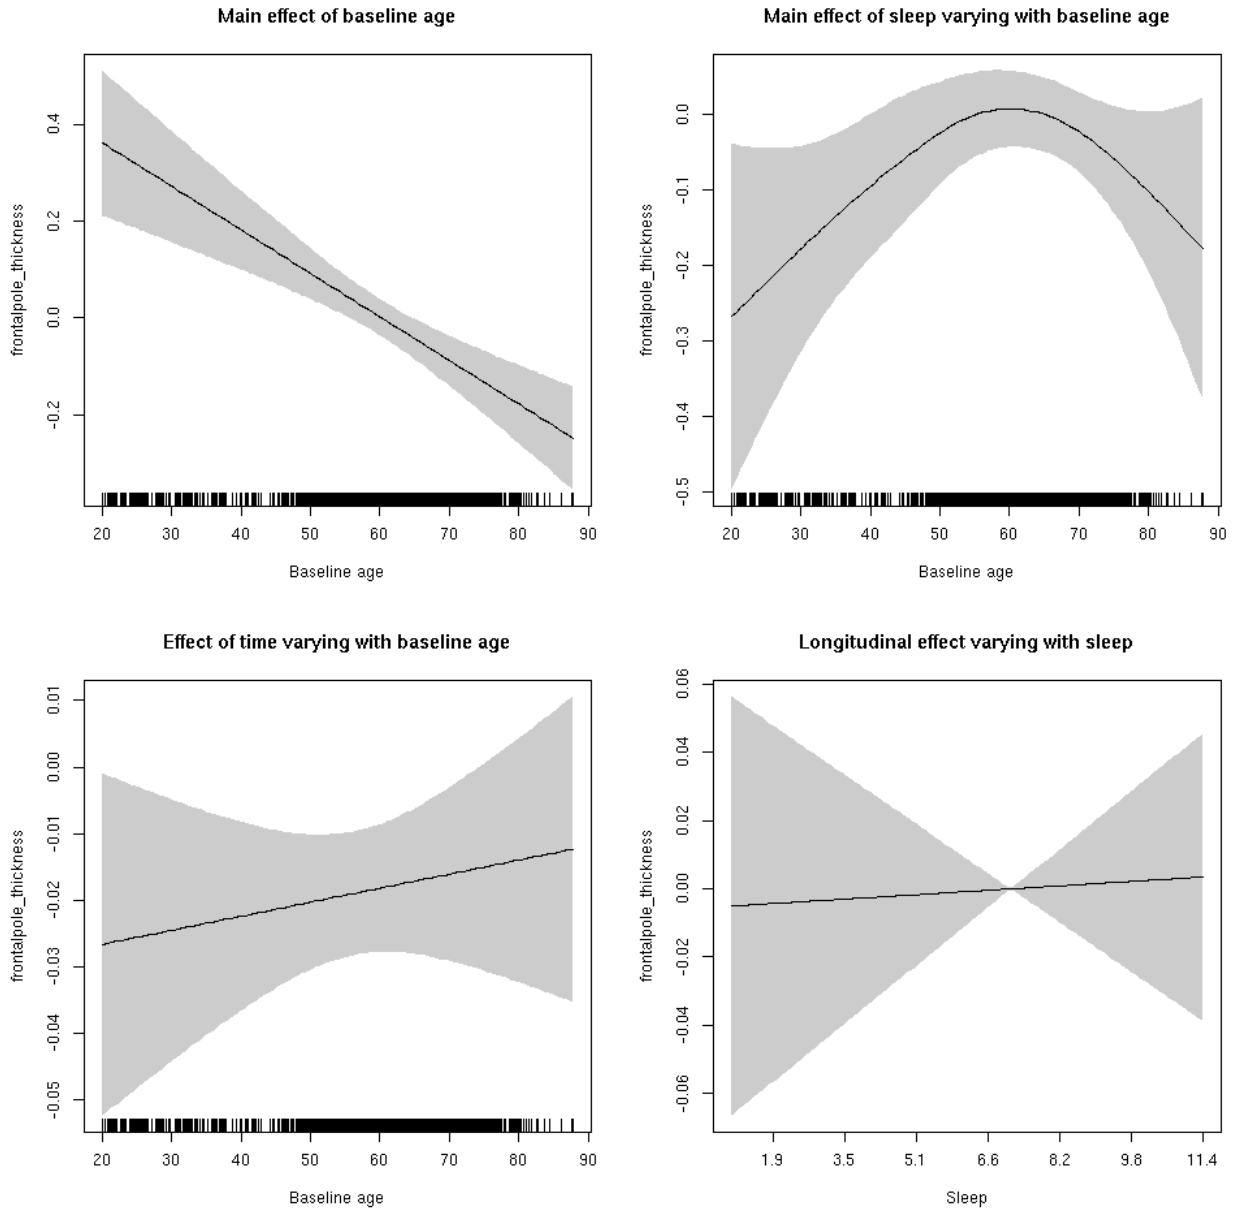

**Male: Full data** Below is the row for `s(sleep_z):time` from the model output.

```
## s(sleep_z):time  1.00  1.00  0.022  0.882
```

Below are plots of a plot of `s(bl_age)`, `s(bl_age):sleep_z`, `s(bl_age):time`, and `s(sleep_z):time`. For `s(sleep_z):time`, roughly, if we cannot fit a straight line through the confidence bands, there is evidence that the effect of time depends on sleep duration. It is correct that the confidence interval is zero at one point along the axis; this happens because we do not include the main effect.

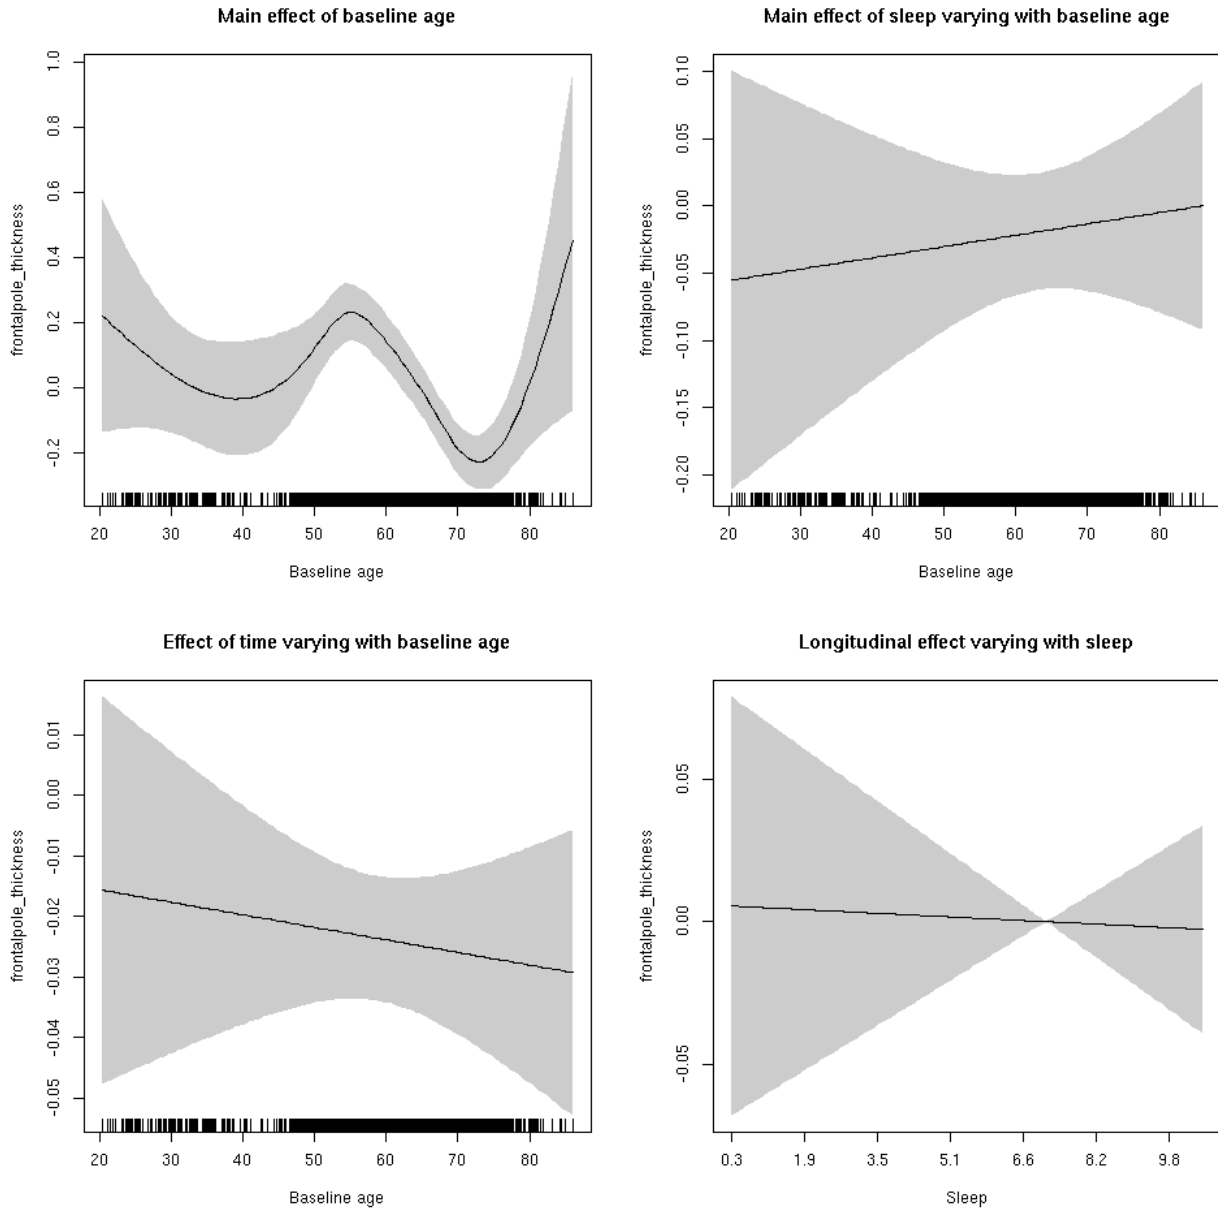

## frontalpole\_thickness

**Full data** Below is the model output. The term `s(sleep_z):time` is probably what we care most about.

```
##
## Family: gaussian
## Link function: identity
##
## Formula:
## value ~ sex + site + s(bl_age, k = 10, bs = "cr") + s(bl_age,
##   by = sleep_z, bs = "cr") + +s(bl_age, by = time, k = 5, bs = "cr") +
##   s(sleep_z, by = time, k = 5, bs = "cr", pc = 0)
## <environment: 0x5630035ca488>
```

```

##
## Parametric coefficients:
##           Estimate Std. Error t value Pr(>|t|)
## (Intercept) -0.71136    0.05490 -12.956 < 2e-16 ***
## sexmale     -0.11631    0.02740  -4.244 2.22e-05 ***
## siteousAvanto 0.07407    0.07322   1.012  0.312
## siteousPrisma 0.39630    0.33654   1.178  0.239
## siteousSkyra -0.54956    0.07322 -7.506 6.76e-14 ***
## siteUB       0.98731    0.14470   6.823 9.54e-12 ***
## siteUCAM     0.50947    0.07620   6.686 2.44e-11 ***
## siteUKB      0.90631    0.05581  16.238 < 2e-16 ***
## siteUmU     -0.55462    0.09027  -6.144 8.41e-10 ***
## ---
## Signif. codes:  0 '***' 0.001 '**' 0.01 '*' 0.05 '.' 0.1 ' ' 1
##
## Approximate significance of smooth terms:
##           edf Ref.df      F p-value
## s(bl_age)      6.226  6.226 13.711 <2e-16 ***
## s(bl_age):sleep_z 2.213  2.213  1.866  0.176
## s(bl_age):time  2.000  2.000 18.193 <2e-16 ***
## s(sleep_z):time  1.000  1.000  0.019  0.889
## ---
## Signif. codes:  0 '***' 0.001 '**' 0.01 '*' 0.05 '.' 0.1 ' ' 1
##
## R-sq.(adj) =  0.244
## lmer.REML = 17837  Scale est. = 0.19929  n = 8171

```

Below are plots of a plot of  $s(\text{bl\_age})$ ,  $s(\text{bl\_age}):\text{sleep\_z}$ ,  $s(\text{bl\_age}):\text{time}$ , and  $s(\text{sleep\_z}):\text{time}$ . For  $s(\text{sleep\_z}):\text{time}$ , roughly, if we cannot fit a straight line through the confidence bands, there is evidence that the effect of time depends on sleep duration. It is correct that the confidence interval is zero at one point along the axis; this happens because we do not include the main effect.



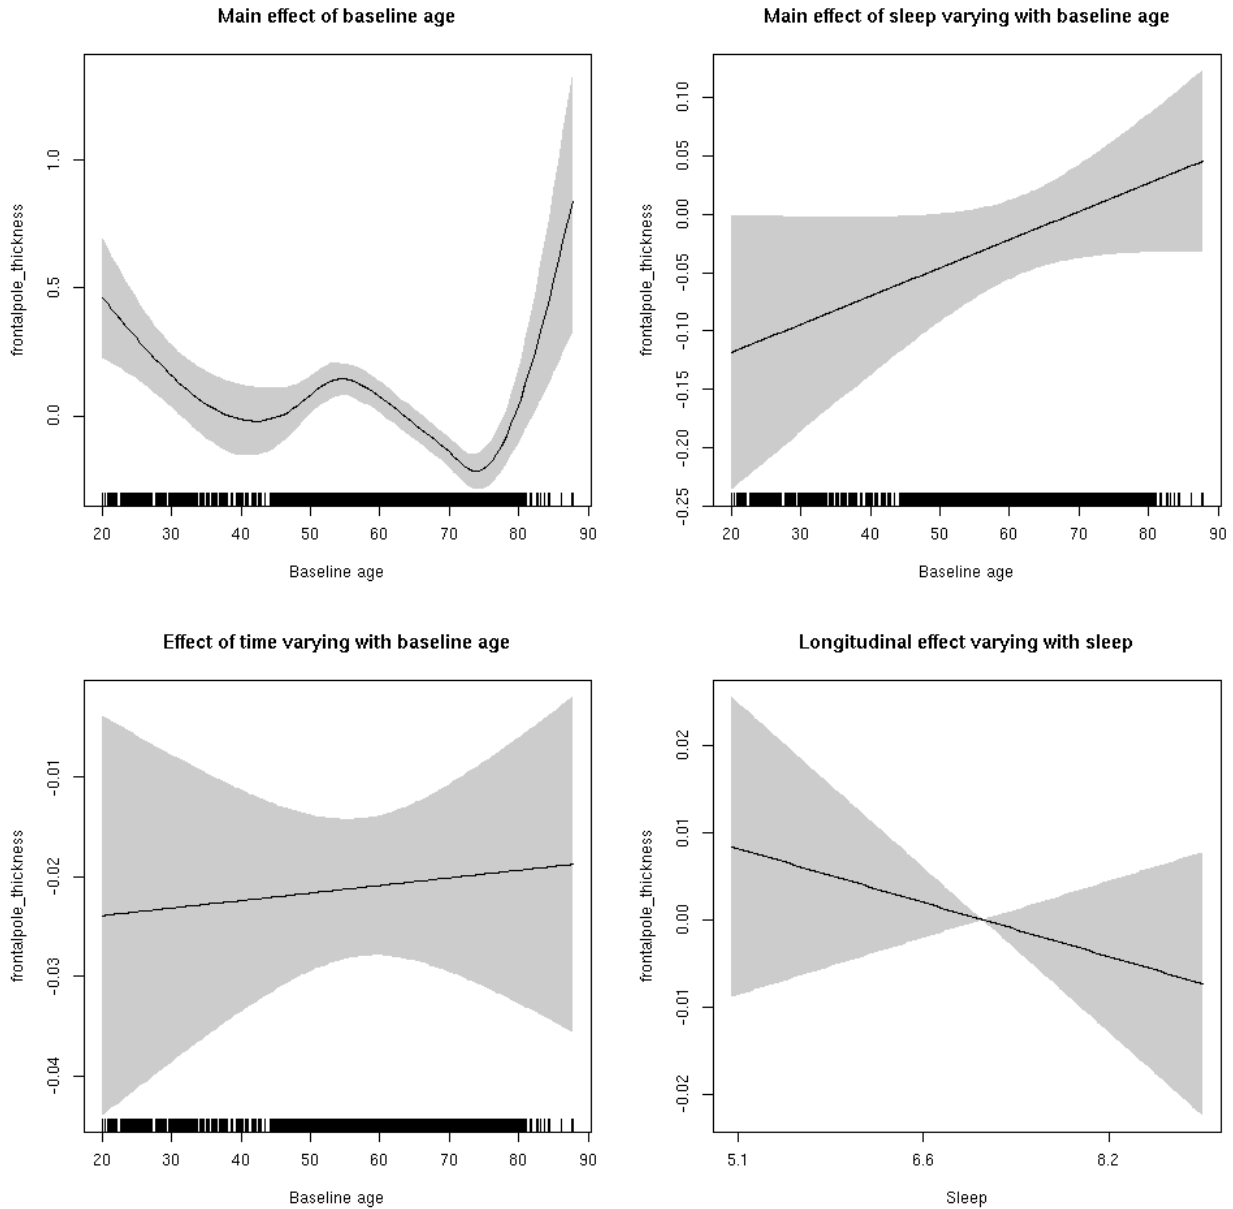

**Restricted to sleep  $\geq 5$  and  $\leq 9$  hours** Below is the row for `s(sleep_z):time` from the model output.

```
## s(sleep_z):time 1.000 1.000 0.946 0.331
```

Below are plots of a plot of `s(bl_age)`, `s(bl_age):sleep_z`, `s(bl_age):time`, and `s(sleep_z):time`. For `s(sleep_z):time`, roughly, if we cannot fit a straight line through the confidence bands, there is evidence that the effect of time depends on sleep duration. It is correct that the confidence interval is zero at one point along the axis; this happens because we do not include the main effect.

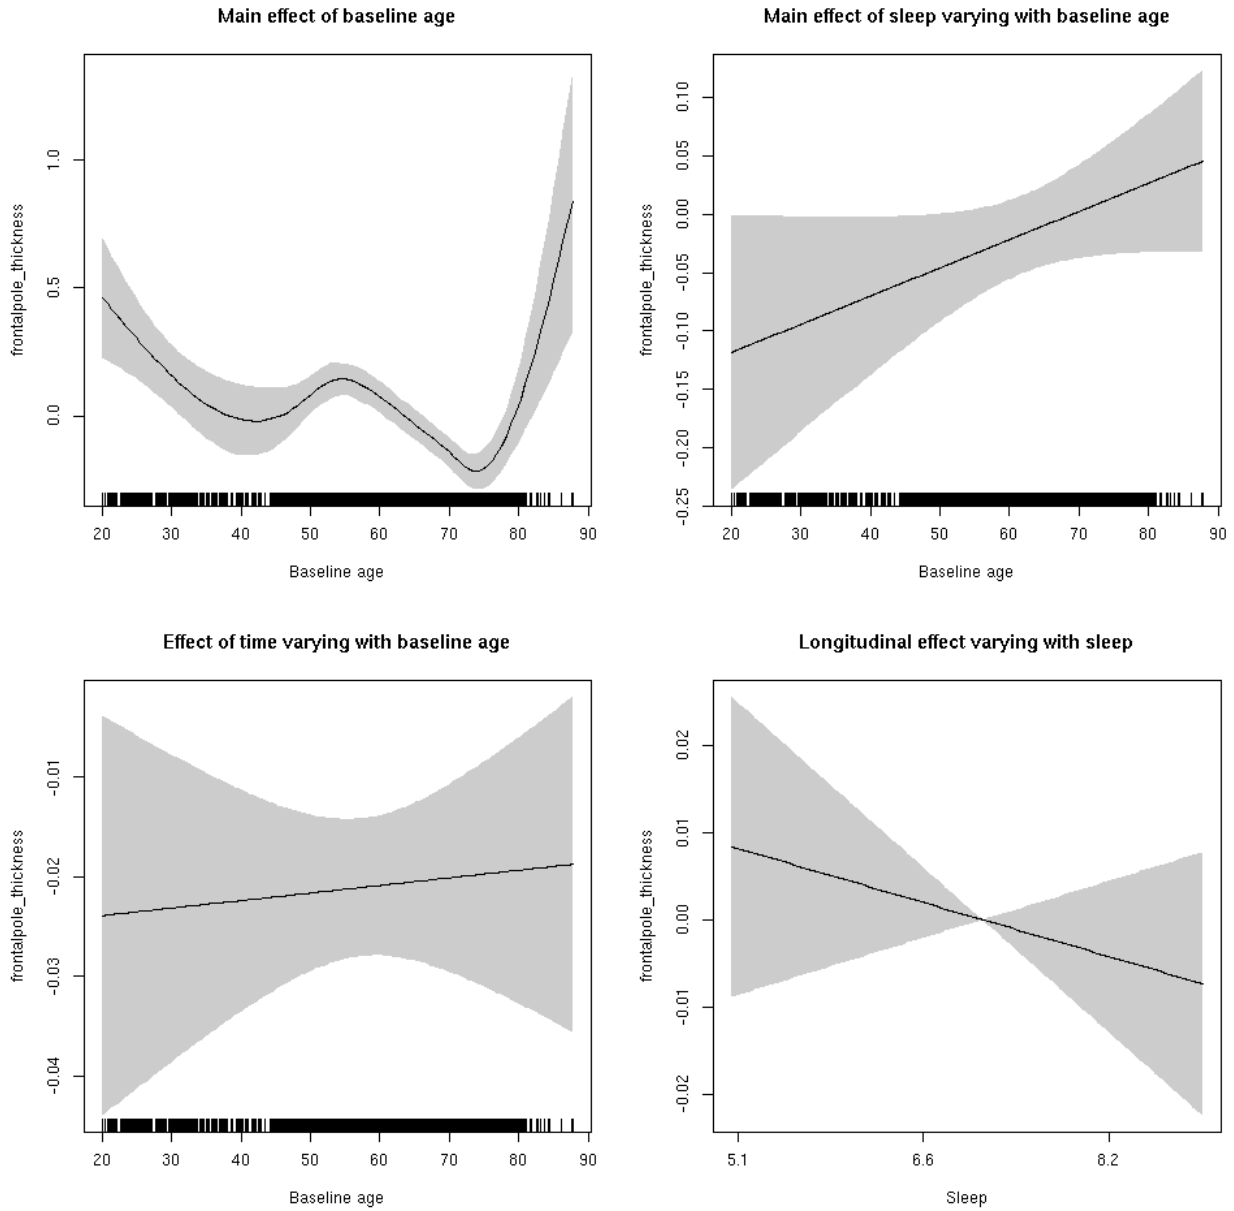

## frontalpole\_volume: Stratified by sex

**Female: Full data** Below is the row for `s(sleep_z):time` from the model output.

```
## s(sleep_z):time  1.000  1.000  0.031  0.861
```

Below are plots of a plot of `s(bl_age)`, `s(bl_age):sleep_z`, `s(bl_age):time`, and `s(sleep_z):time`. For `s(sleep_z):time`, roughly, if we cannot fit a straight line through the confidence bands, there is evidence that the effect of time depends on sleep duration. It is correct that the confidence interval is zero at one point along the axis; this happens because we do not include the main effect.

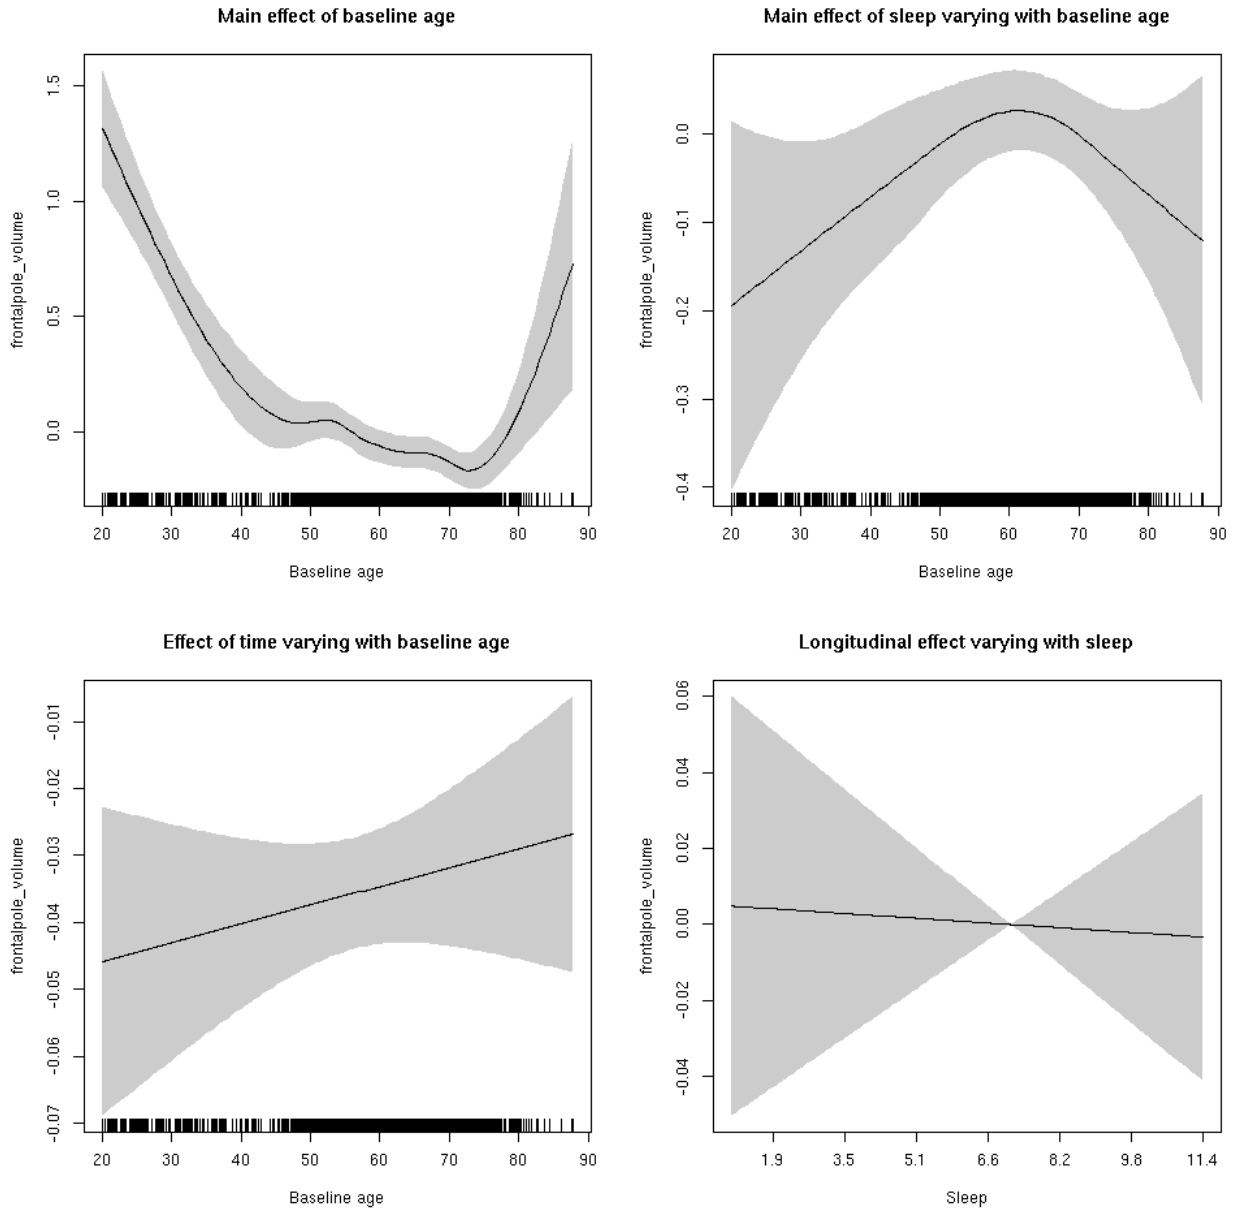

**Male: Full data** Below is the row for `s(sleep_z):time` from the model output.

```
## s(sleep_z):time  1.000  1.000  0.574  0.449
```

Below are plots of a plot of `s(bl_age)`, `s(bl_age):sleep_z`, `s(bl_age):time`, and `s(sleep_z):time`. For `s(sleep_z):time`, roughly, if we cannot fit a straight line through the confidence bands, there is evidence that the effect of time depends on sleep duration. It is correct that the confidence interval is zero at one point along the axis; this happens because we do not include the main effect.

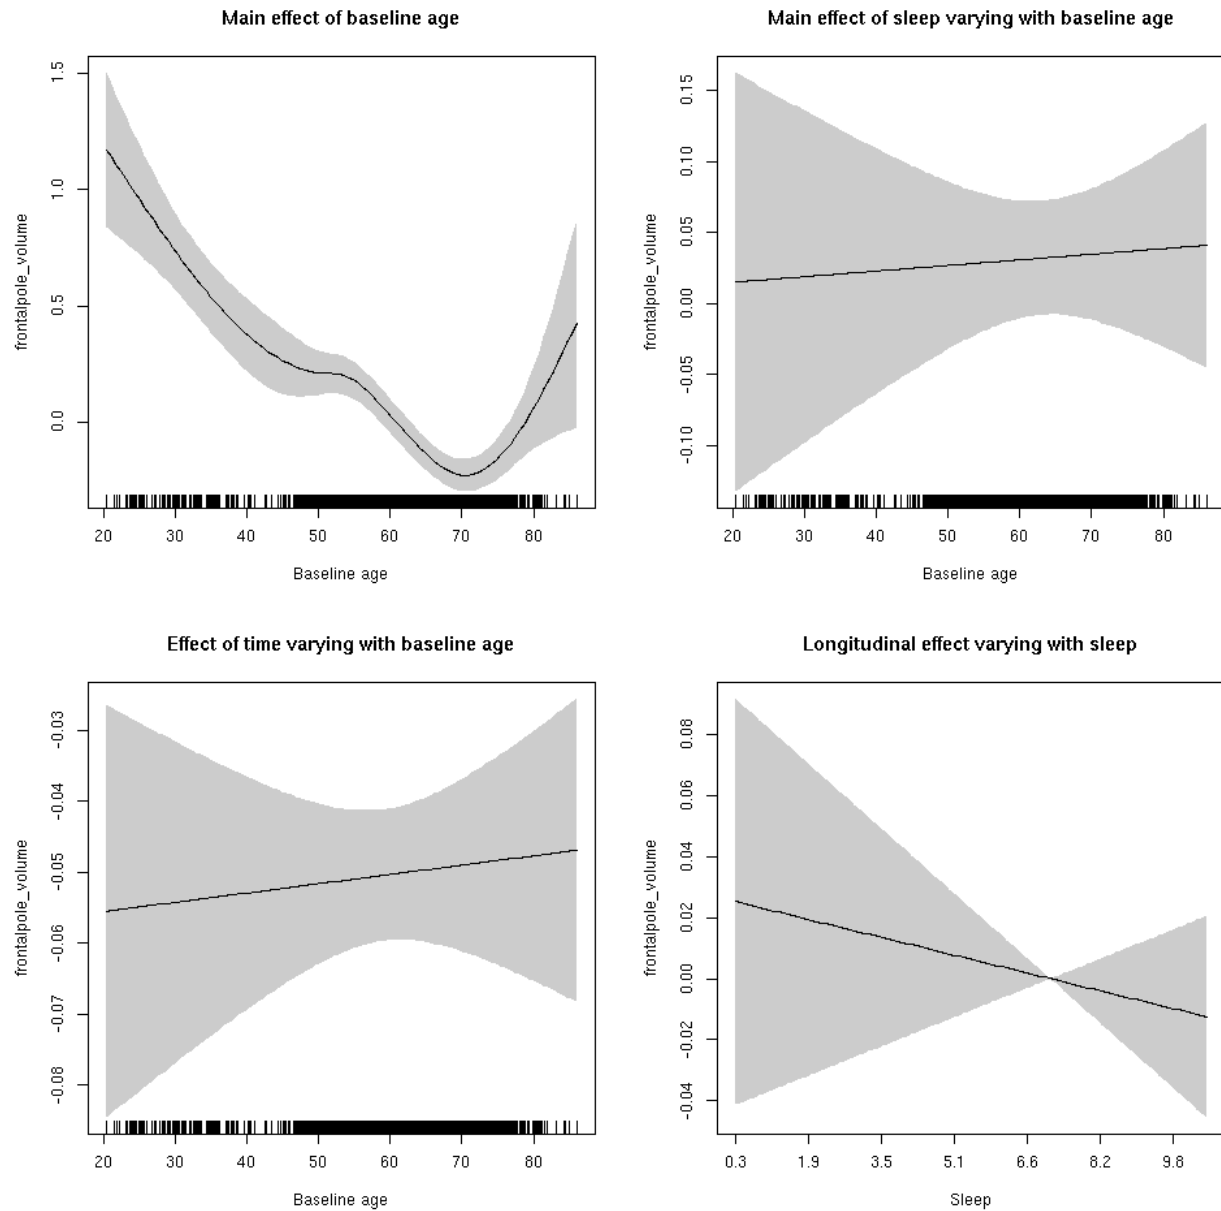

## frontalpole\_volume

**Full data** Below is the model output. The term `s(sleep_z):time` is probably what we care most about.

```
##
## Family: gaussian
## Link function: identity
##
## Formula:
## value ~ sex + site + icv + s(bl_age, k = 10, bs = "cr") + s(bl_age,
##   by = sleep_z, bs = "cr") + +s(bl_age, by = time, k = 5, bs = "cr") +
##   s(sleep_z, by = time, k = 5, bs = "cr", pc = 0)
## <environment: 0x5630035a29c8>
```

```

##
## Parametric coefficients:
##           Estimate Std. Error t value Pr(>|t|)
## (Intercept)  0.61850   0.05933  10.425 < 2e-16 ***
## sexmale      0.20154   0.03034   6.643 3.28e-11 ***
## siteousAvanto -0.38828  0.07373  -5.266 1.43e-07 ***
## siteousPrisma  0.08164   0.30503   0.268 0.788982
## siteousSkyra -0.27516  0.07144  -3.852 0.000118 ***
## siteUB       0.22471   0.13377   1.680 0.093037 .
## siteUCAM     -0.21036  0.07423  -2.834 0.004610 **
## siteUKB      -0.59497   0.05644 -10.542 < 2e-16 ***
## siteUmU      -0.29136  0.08420  -3.460 0.000542 ***
## icv          0.25983   0.01504  17.273 < 2e-16 ***
## ---
## Signif. codes:  0 '***' 0.001 '**' 0.01 '*' 0.05 '.' 0.1 ' ' 1
##
## Approximate significance of smooth terms:
##           edf Ref.df    F p-value
## s(bl_age)      6.318  6.318 44.322 <2e-16 ***
## s(bl_age):sleep_z 2.422  2.422  0.682  0.643
## s(bl_age):time  2.000  2.000 93.736 <2e-16 ***
## s(sleep_z):time  1.000  1.000  0.515  0.473
## ---
## Signif. codes:  0 '***' 0.001 '**' 0.01 '*' 0.05 '.' 0.1 ' ' 1
##
## R-sq.(adj) =  0.233
## lmer.REML = 16184  Scale est. = 0.16045  n = 8156

```

Below are plots of a plot of  $s(\text{bl\_age})$ ,  $s(\text{bl\_age}):\text{sleep\_z}$ ,  $s(\text{bl\_age}):\text{time}$ , and  $s(\text{sleep\_z}):\text{time}$ . For  $s(\text{sleep\_z}):\text{time}$ , roughly, if we cannot fit a straight line through the confidence bands, there is evidence that the effect of time depends on sleep duration. It is correct that the confidence interval is zero at one point along the axis; this happens because we do not include the main effect.

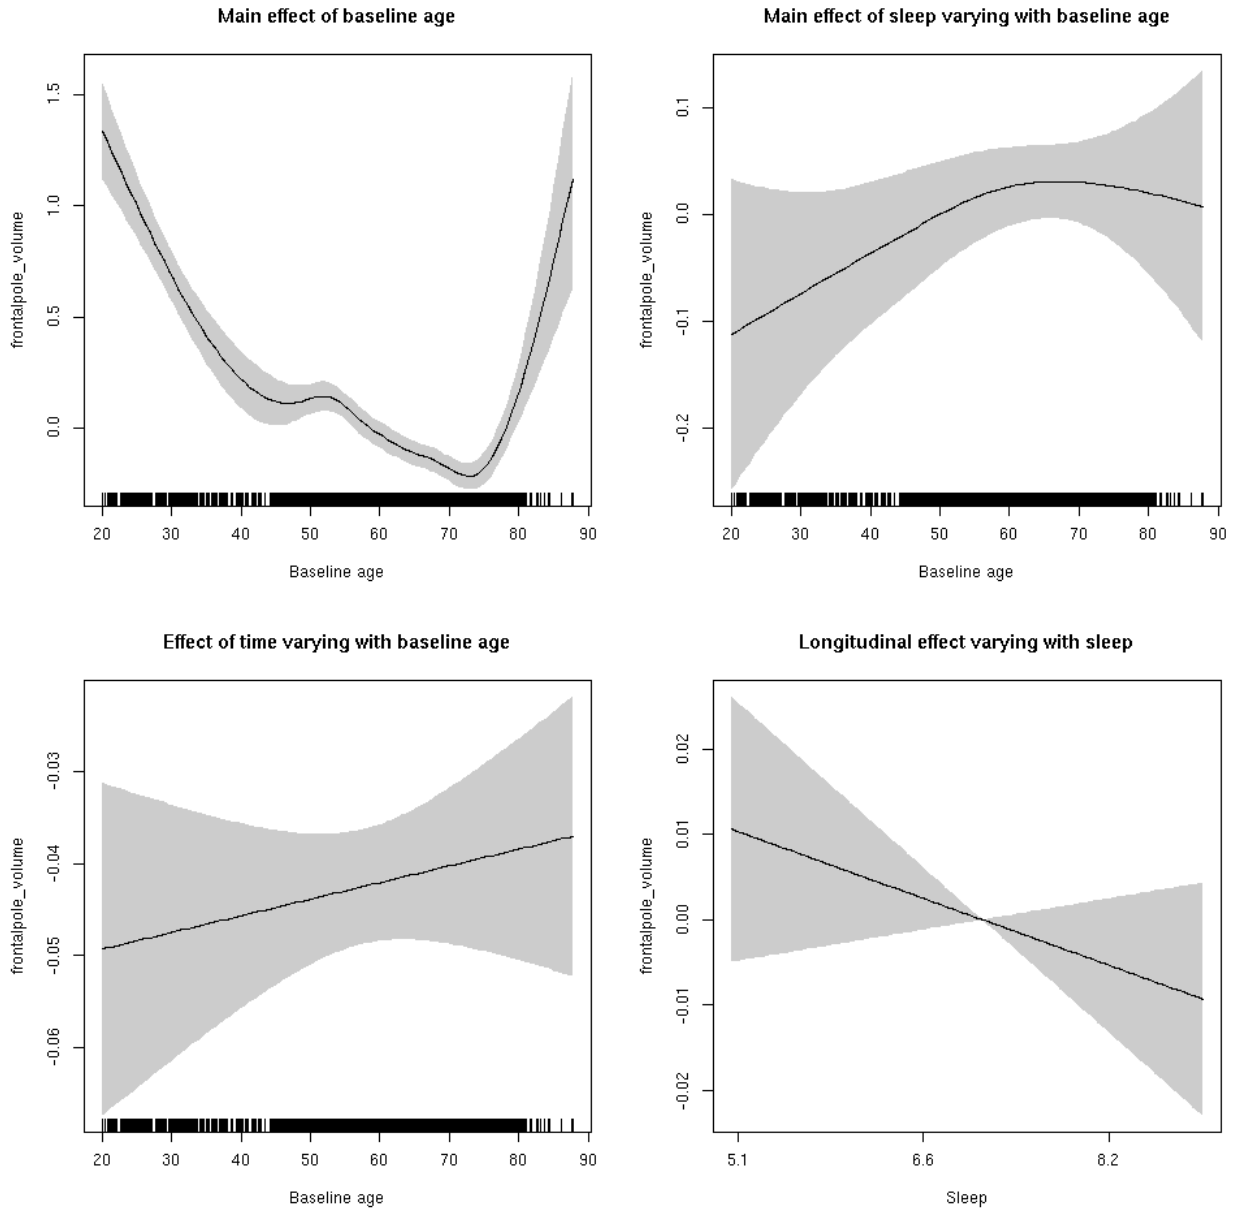

**Restricted to sleep  $\geq 5$  and  $\leq 9$  hours** Below is the row for `s(sleep_z):time` from the model output.

```
## s(sleep_z):time  1.000  1.000  1.855  0.173
```

Below are plots of a plot of `s(bl_age)`, `s(bl_age):sleep_z`, `s(bl_age):time`, and `s(sleep_z):time`. For `s(sleep_z):time`, roughly, if we cannot fit a straight line through the confidence bands, there is evidence that the effect of time depends on sleep duration. It is correct that the confidence interval is zero at one point along the axis; this happens because we do not include the main effect.



### fusiform\_area: Stratified by sex

**Female: Full data** Below is the row for `s(sleep_z):time` from the model output.

```
## s(sleep_z):time  1.000  1.000  2.055  0.152
```

Below are plots of a plot of `s(bl_age)`, `s(bl_age):sleep_z`, `s(bl_age):time`, and `s(sleep_z):time`. For `s(sleep_z):time`, roughly, if we cannot fit a straight line through the confidence bands, there is evidence that the effect of time depends on sleep duration. It is correct that the confidence interval is zero at one point along the axis; this happens because we do not include the main effect.

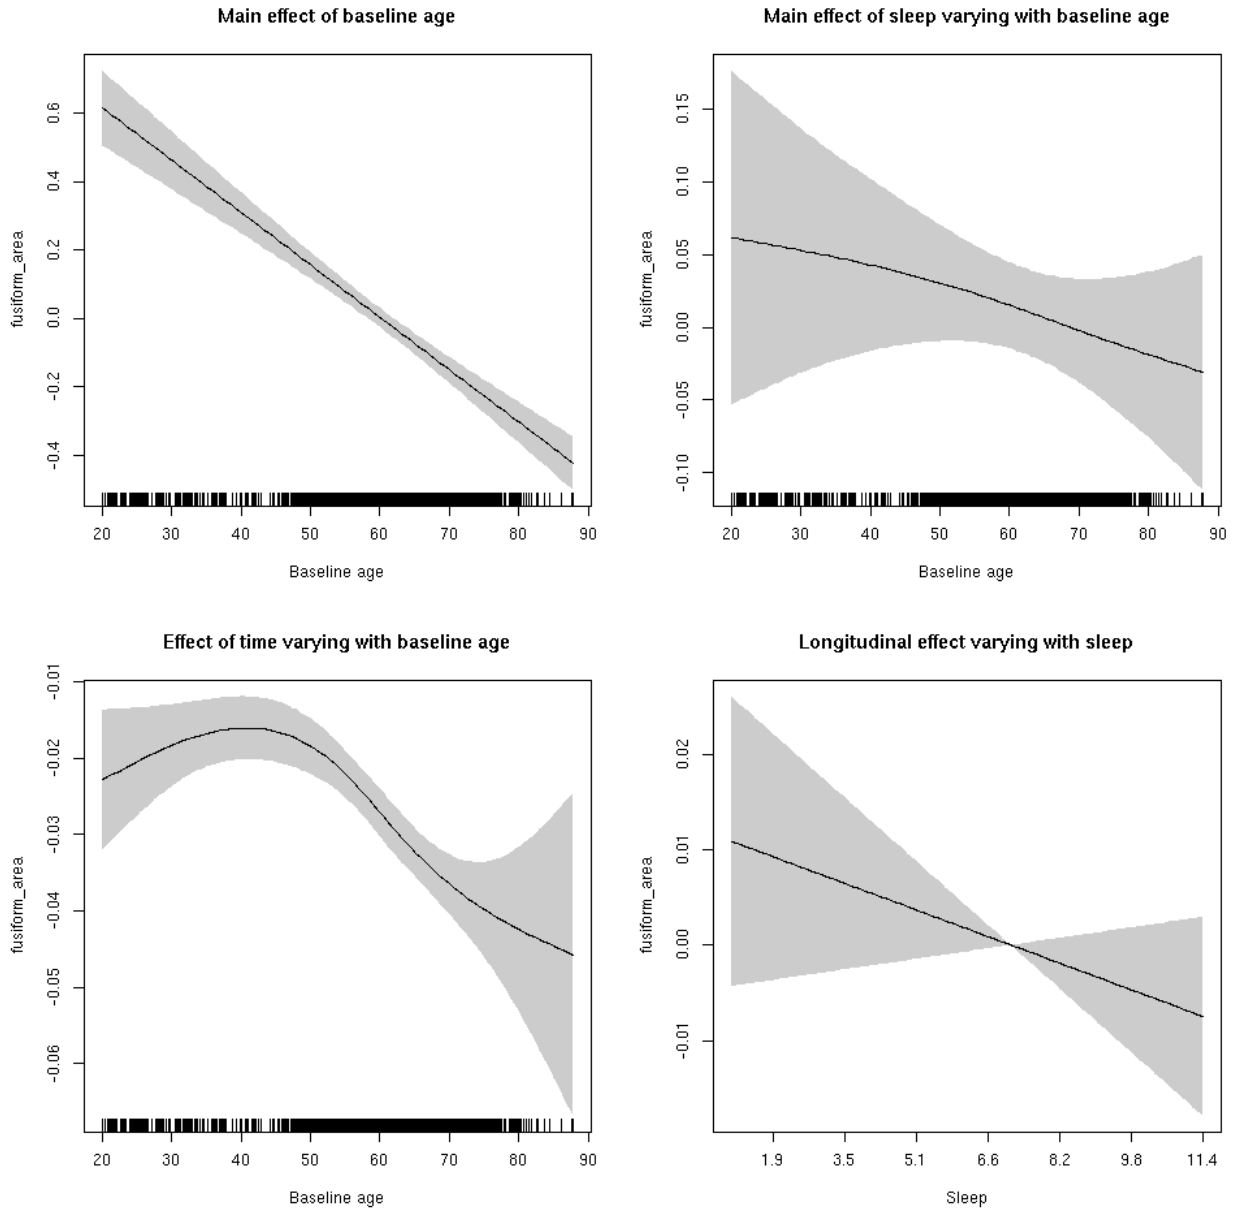

**Male: Full data** Below is the row for `s(sleep_z):time` from the model output.

```
## s(sleep_z):time  1.000  1.000  0.082  0.775
```

Below are plots of a plot of `s(bl_age)`, `s(bl_age):sleep_z`, `s(bl_age):time`, and `s(sleep_z):time`. For `s(sleep_z):time`, roughly, if we cannot fit a straight line through the confidence bands, there is evidence that the effect of time depends on sleep duration. It is correct that confidence interval is zero at one point along the axis; this happens because we do not include the main effect.



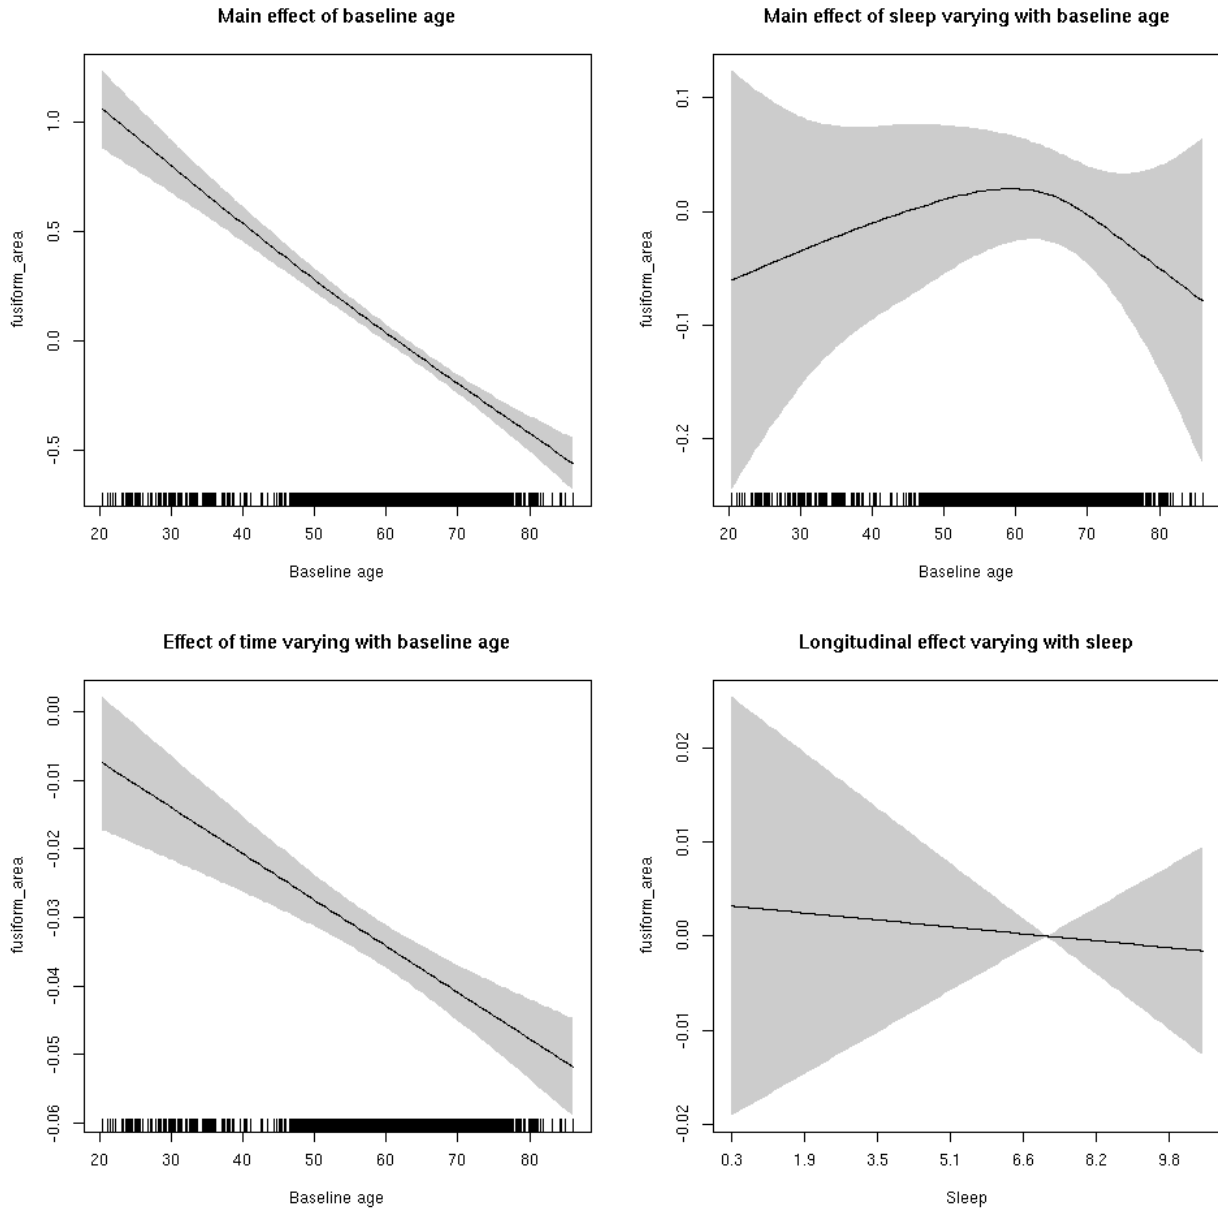

## fusiform\_area

**Full data** Below is the model output. The term `s(sleep_z):time` is probably what we care most about.

```
##
## Family: gaussian
## Link function: identity
##
## Formula:
## value ~ sex + site + icv + s(bl_age, k = 10, bs = "cr") + s(bl_age,
##   by = sleep_z, bs = "cr") + +s(bl_age, by = time, k = 5, bs = "cr") +
##   s(sleep_z, by = time, k = 5, bs = "cr", pc = 0)
## <environment: 0x5630035aae60>
```

```

##
## Parametric coefficients:
##           Estimate Std. Error t value Pr(>|t|)
## (Intercept)  0.52552    0.05062  10.381 < 2e-16 ***
## sexmale      0.40374    0.02632  15.340 < 2e-16 ***
## siteousAvanto -0.72947    0.06228 -11.713 < 2e-16 ***
## siteousPrisma -1.00984    0.11273  -8.958 < 2e-16 ***
## siteousSkyra  -0.30556    0.06032  -5.065 4.17e-07 ***
## siteUB       -0.78747    0.11853  -6.644 3.26e-11 ***
## siteUCAM     -0.63674    0.06322 -10.071 < 2e-16 ***
## siteUKB      -0.70737    0.04724 -14.973 < 2e-16 ***
## siteUmU      -0.54499    0.07298  -7.467 9.04e-14 ***
## icv          0.53246    0.01279  41.639 < 2e-16 ***
## ---
## Signif. codes:  0 '***' 0.001 '**' 0.01 '*' 0.05 '.' 0.1 ' ' 1
##
## Approximate significance of smooth terms:
##           edf Ref.df      F p-value
## s(bl_age)      1.000  1.000 373.099 <2e-16 ***
## s(bl_age):sleep_z 3.172  3.172  1.693  0.174
## s(bl_age):time  3.988  3.988 265.645 <2e-16 ***
## s(sleep_z):time  1.000  1.000  0.983  0.322
## ---
## Signif. codes:  0 '***' 0.001 '**' 0.01 '*' 0.05 '.' 0.1 ' ' 1
##
## R-sq.(adj) =  0.54
## lmer.REML = 4890.2  Scale est. = 0.014406  n = 8164

```

Below are plots of a plot of `s(bl_age)`, `s(bl_age):sleep_z`, `s(bl_age):time`, and `s(sleep_z):time`. For `s(sleep_z):time`, roughly, if we cannot fit a straight line through the confidence bands, there is evidence that the effect of time depends on sleep duration. It is correct that the confidence interval is zero at one point along the axis; this happens because we do not include the main effect.

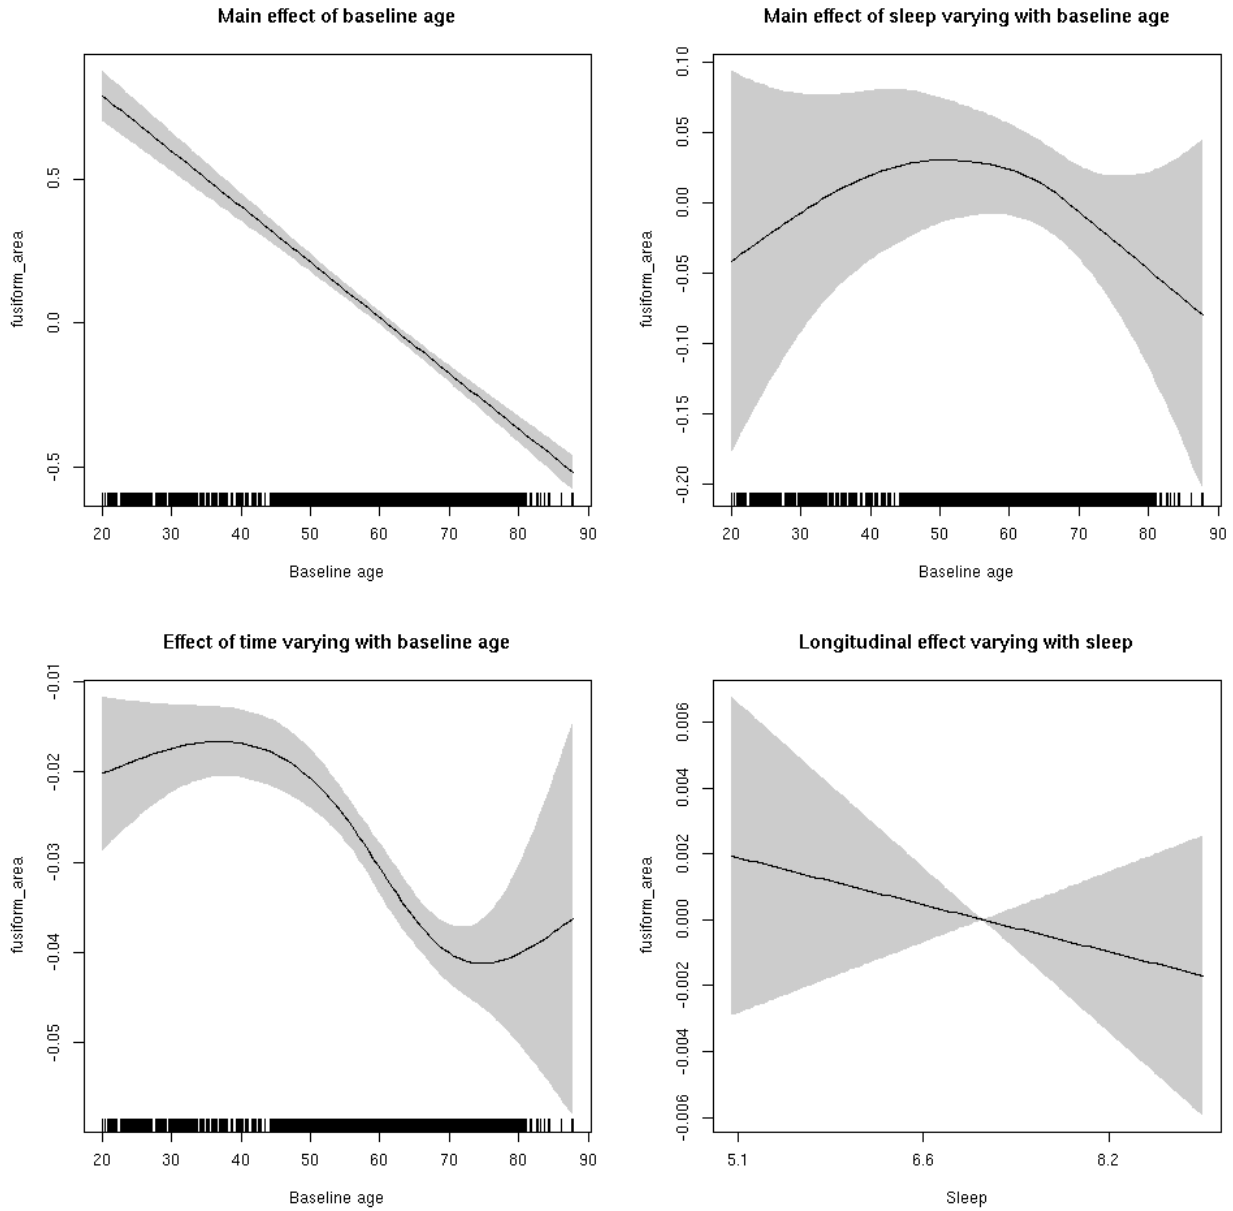

**Restricted to sleep  $\geq 5$  and  $\leq 9$  hours** Below is the row for `s(sleep_z):time` from the model output.

```
## s(sleep_z):time  1.000  1.000  0.639  0.424
```

Below are plots of a plot of `s(bl_age)`, `s(bl_age):sleep_z`, `s(bl_age):time`, and `s(sleep_z):time`. For `s(sleep_z):time`, roughly, if we cannot fit a straight line through the confidence bands, there is evidence that the effect of time depends on sleep duration. It is correct that the confidence interval is zero at one point along the axis; this happens because we do not include the main effect.

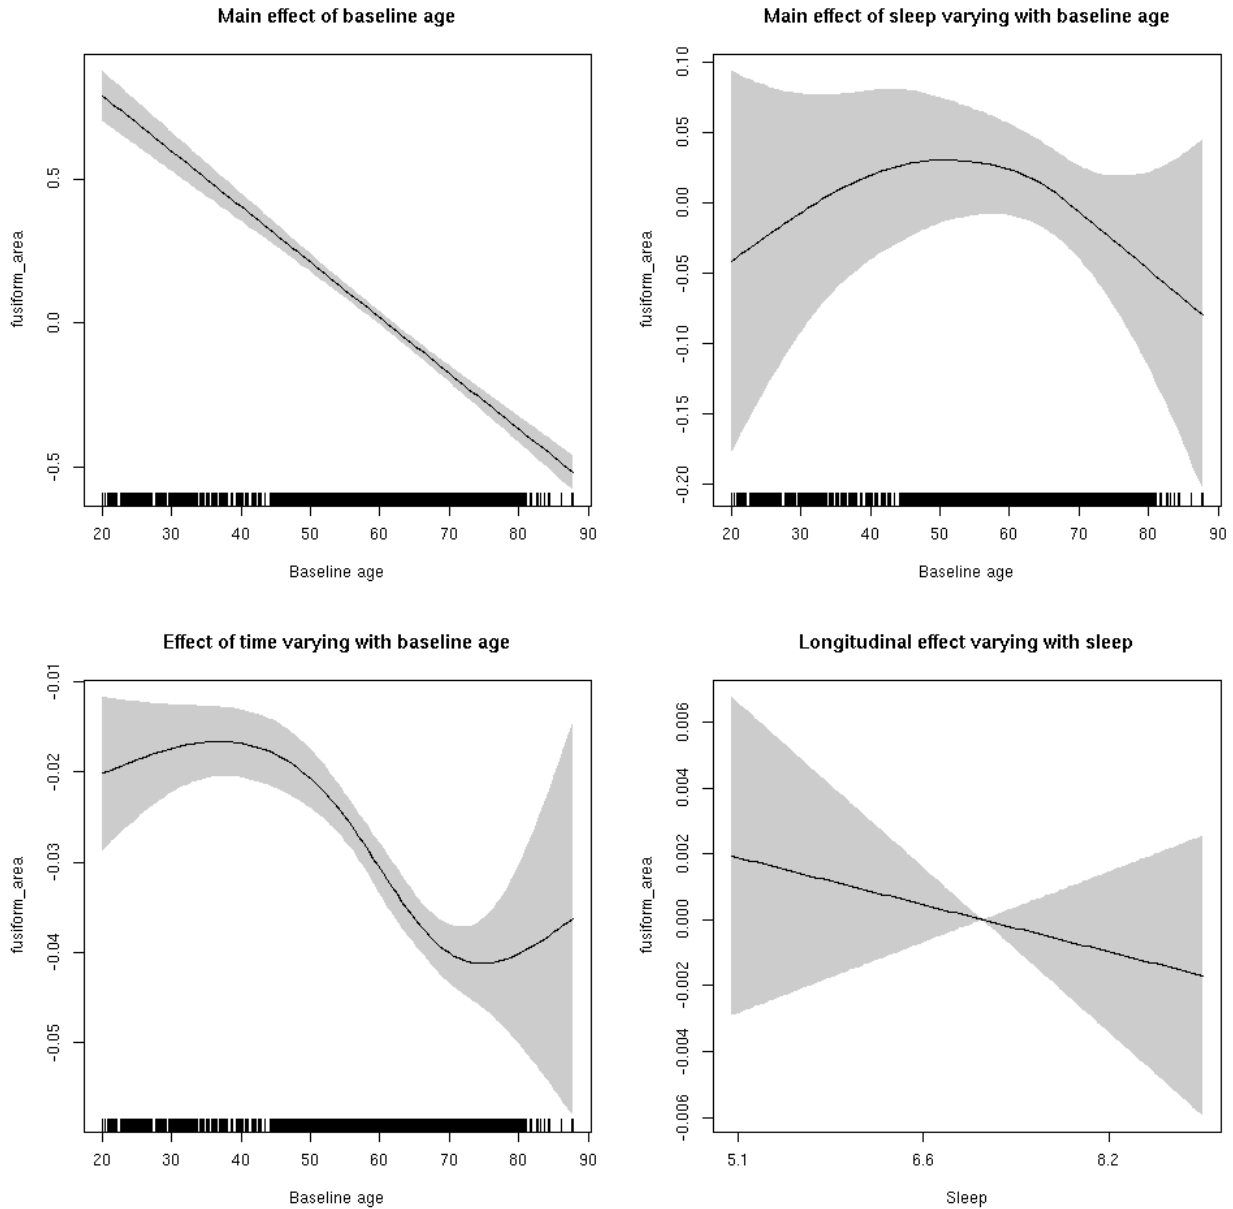

## fusiform\_thickness: Stratified by sex

**Female: Full data** Below is the row for `s(sleep_z):time` from the model output.

```
## s(sleep_z):time  1.000  1.000  2.275  0.132
```

Below are plots of a plot of `s(bl_age)`, `s(bl_age):sleep_z`, `s(bl_age):time`, and `s(sleep_z):time`. For `s(sleep_z):time`, roughly, if we cannot fit a straight line through the confidence bands, there is evidence that the effect of time depends on sleep duration. It is correct that the confidence interval is zero at one point along the axis; this happens because we do not include the main effect.

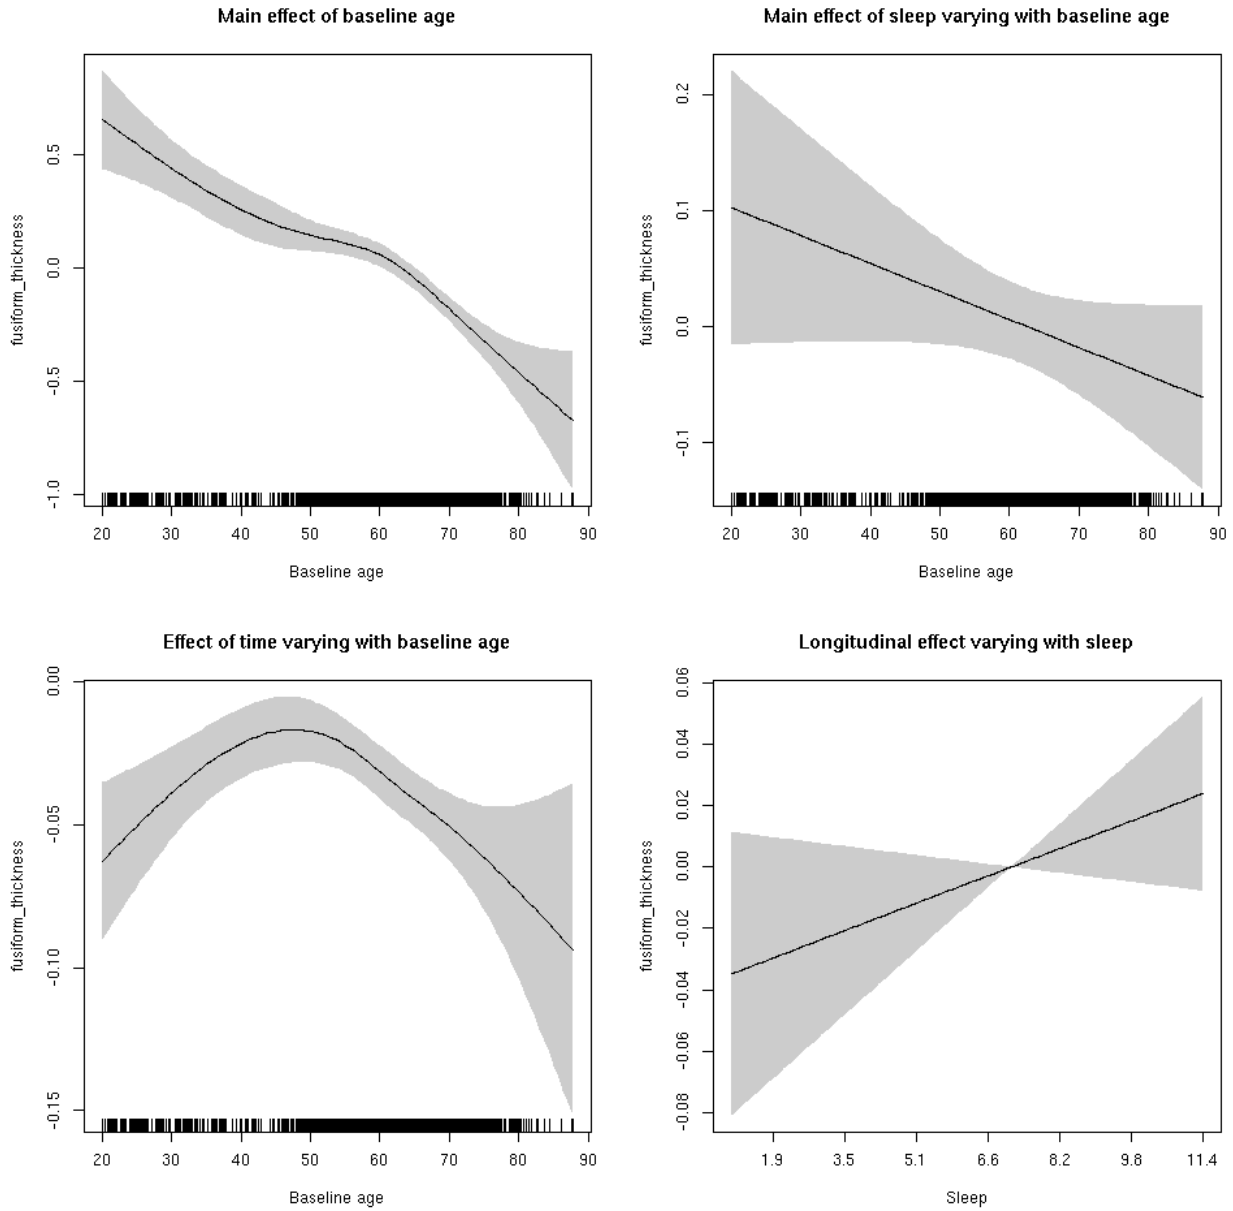

**Male: Full data** Below is the row for `s(sleep_z):time` from the model output.

```
## s(sleep_z):time  1.000  1.000  0.515  0.473
```

Below are plots of a plot of `s(bl_age)`, `s(bl_age):sleep_z`, `s(bl_age):time`, and `s(sleep_z):time`. For `s(sleep_z):time`, roughly, if we cannot fit a straight line through the confidence bands, there is evidence that the effect of time depends on sleep duration. It is correct that the confidence interval is zero at one point along the axis; this happens because we do not include the main effect.

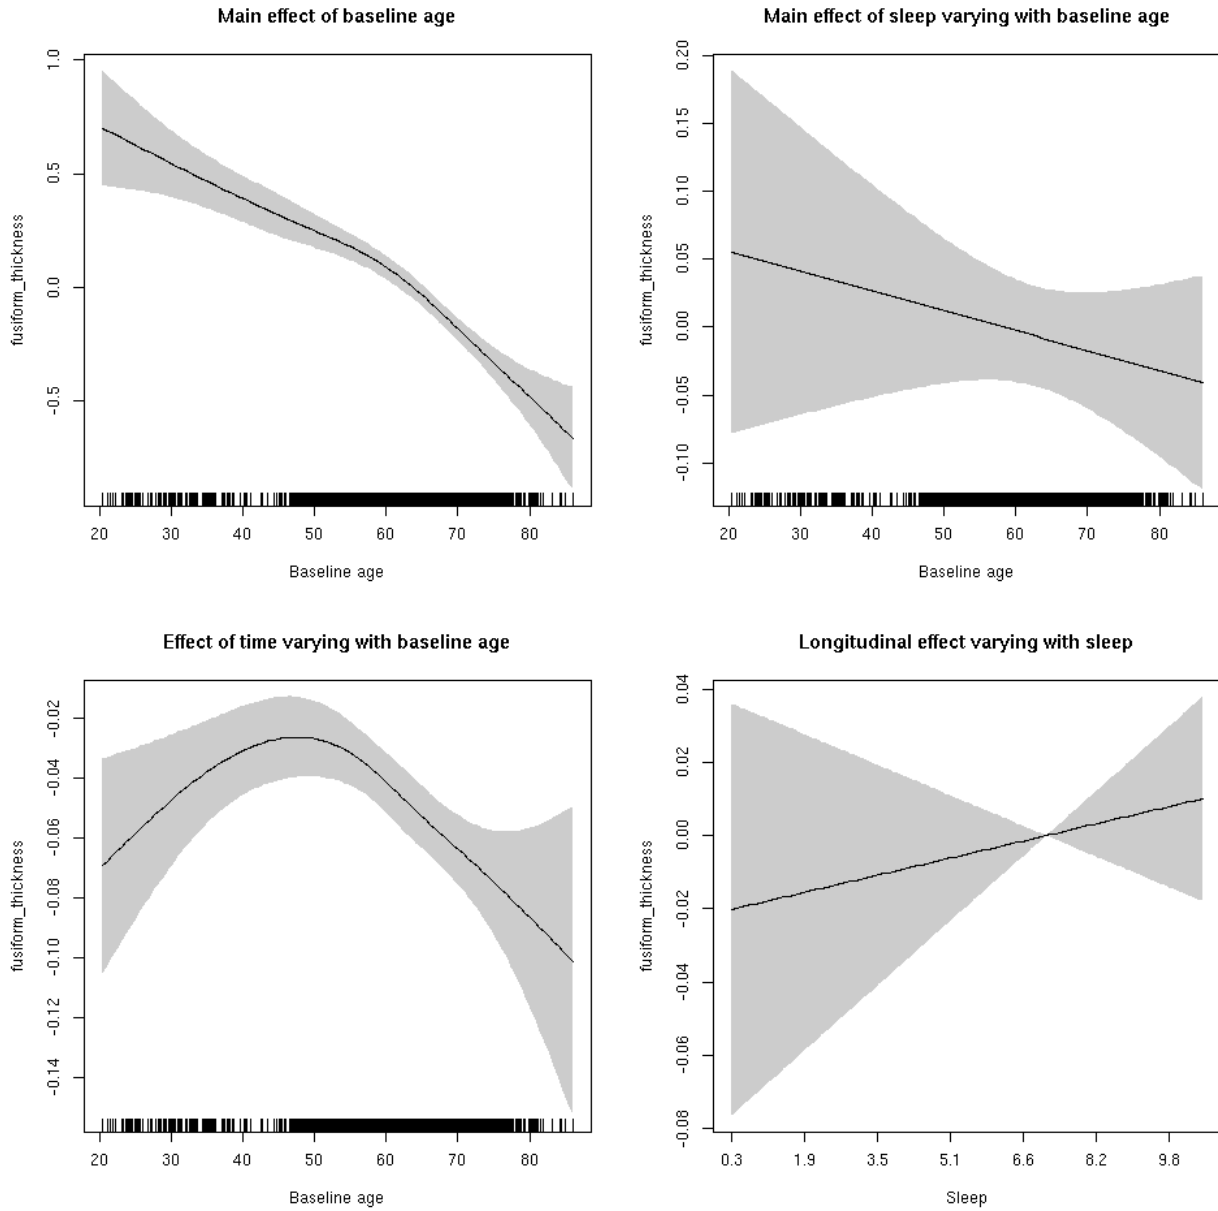

## fusiform\_thickness

**Full data** Below is the model output. The term `s(sleep_z):time` is probably what we care most about.

```
##
## Family: gaussian
## Link function: identity
##
## Formula:
## value ~ sex + site + s(bl_age, k = 10, bs = "cr") + s(bl_age,
##   by = sleep_z, bs = "cr") + +s(bl_age, by = time, k = 5, bs = "cr") +
##   s(sleep_z, by = time, k = 5, bs = "cr", pc = 0)
## <environment: 0x5630035ca300>
```

```

##
## Parametric coefficients:
##           Estimate Std. Error t value Pr(>|t|)
## (Intercept) -1.95267    0.04665 -41.861 < 2e-16 ***
## sexmale     -0.02020    0.02336  -0.864  0.38739
## siteousAvanto 0.19443    0.06184   3.144  0.00167 **
## siteousPrisma 0.62291    0.25558   2.437  0.01482 *
## siteousSkyra  0.85388    0.06182  13.813 < 2e-16 ***
## siteUB       0.42290    0.12382   3.415  0.00064 ***
## siteUCAM     0.70146    0.06431  10.908 < 2e-16 ***
## siteUKB      2.25496    0.04733  47.642 < 2e-16 ***
## siteUmU      0.34154    0.07685   4.444 8.93e-06 ***
## ---
## Signif. codes:  0 '***' 0.001 '**' 0.01 '*' 0.05 '.' 0.1 ' ' 1
##
## Approximate significance of smooth terms:
##           edf Ref.df    F p-value
## s(bl_age)      4.085  4.085 77.923 <2e-16 ***
## s(bl_age):sleep_z 2.000  2.000  2.024  0.132
## s(bl_age):time  3.928  3.928 75.390 <2e-16 ***
## s(sleep_z):time  1.000  1.000  2.689  0.101
## ---
## Signif. codes:  0 '***' 0.001 '**' 0.01 '*' 0.05 '.' 0.1 ' ' 1
##
## R-sq.(adj) =  0.581
## lmer.REML = 14094 Scale est. = 0.11103 n = 8170

```

Below are plots of a plot of `s(bl_age)`, `s(bl_age):sleep_z`, `s(bl_age):time`, and `s(sleep_z):time`. For `s(sleep_z):time`, roughly, if we cannot fit a straight line through the confidence bands, there is evidence that the effect of time depends on sleep duration. It is correct that the confidence interval is zero at one point along the axis; this happens because we do not include the main effect.

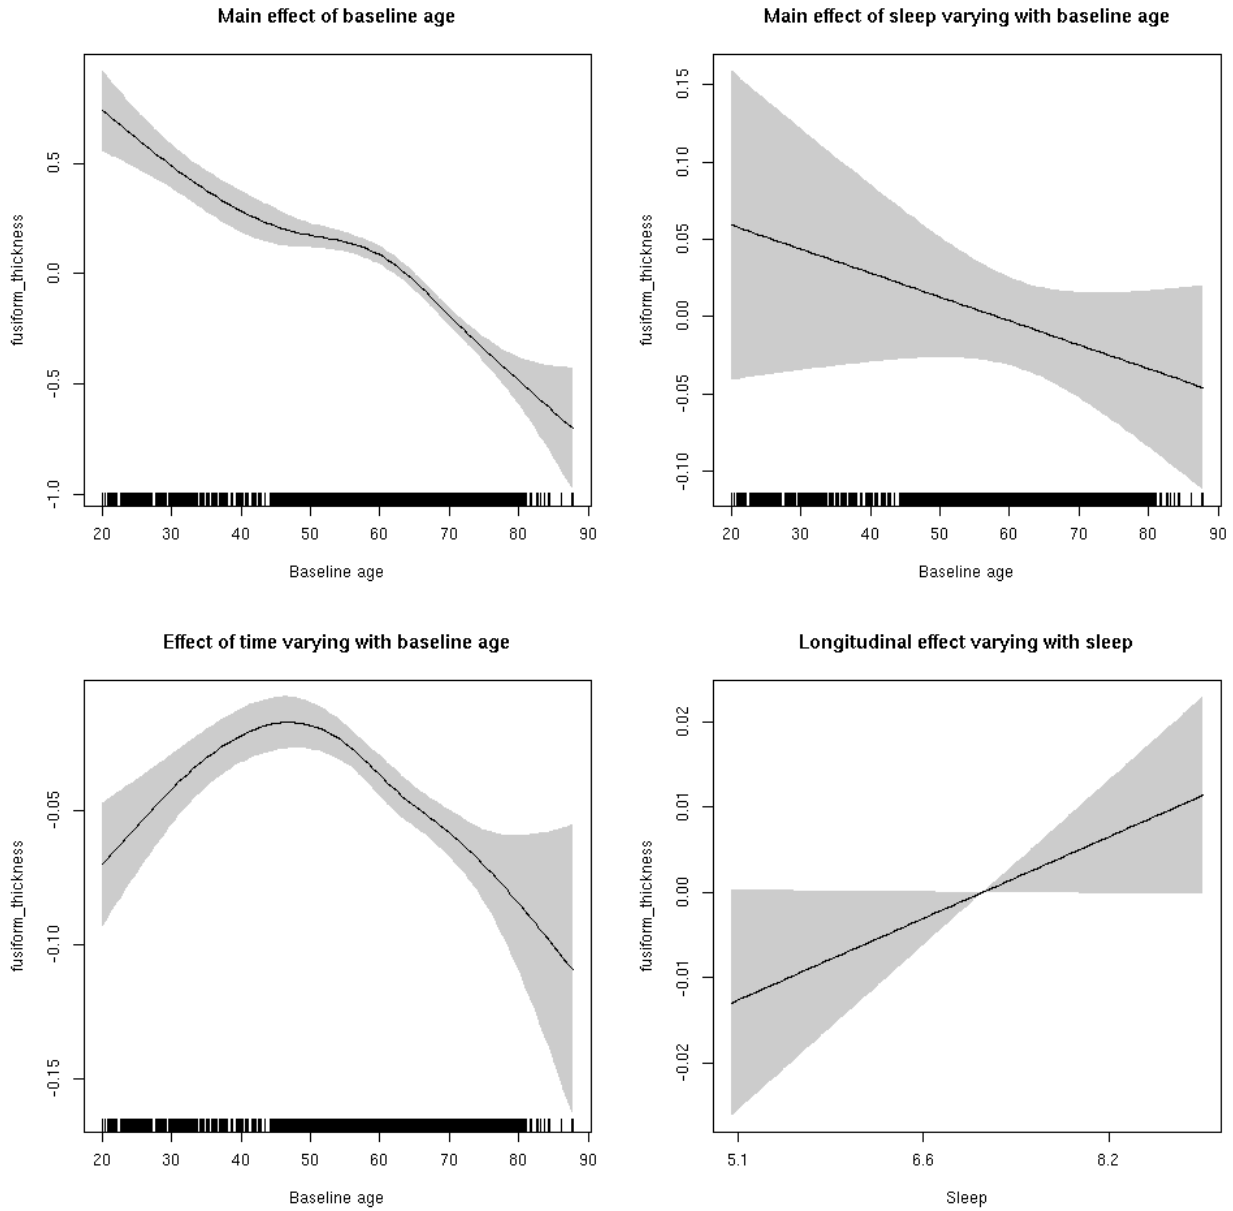

**Restricted to sleep  $\geq 5$  and  $\leq 9$  hours** Below is the row for `s(sleep_z):time` from the model output.

```
## s(sleep_z):time  1.000  1.000  3.842  0.050 .
```

Below are plots of a plot of `s(bl_age)`, `s(bl_age):sleep_z`, `s(bl_age):time`, and `s(sleep_z):time`. For `s(sleep_z):time`, roughly, if we cannot fit a straight line through the confidence bands, there is evidence that the effect of time depends on sleep duration. It is correct that the confidence interval is zero at one point along the axis; this happens because we do not include the main effect.





### fusiform\_volume: Stratified by sex

**Female: Full data** Below is the row for `s(sleep_z):time` from the model output.

```
## s(sleep_z):time  1.000  1.000  0.001  0.9709
```

Below are plots of a plot of `s(bl_age)`, `s(bl_age):sleep_z`, `s(bl_age):time`, and `s(sleep_z):time`. For `s(sleep_z):time`, roughly, if we cannot fit a straight line through the confidence bands, there is evidence that the effect of time depends on sleep duration. It is correct that the confidence interval is zero at one point along the axis; this happens because we do not include the main effect.

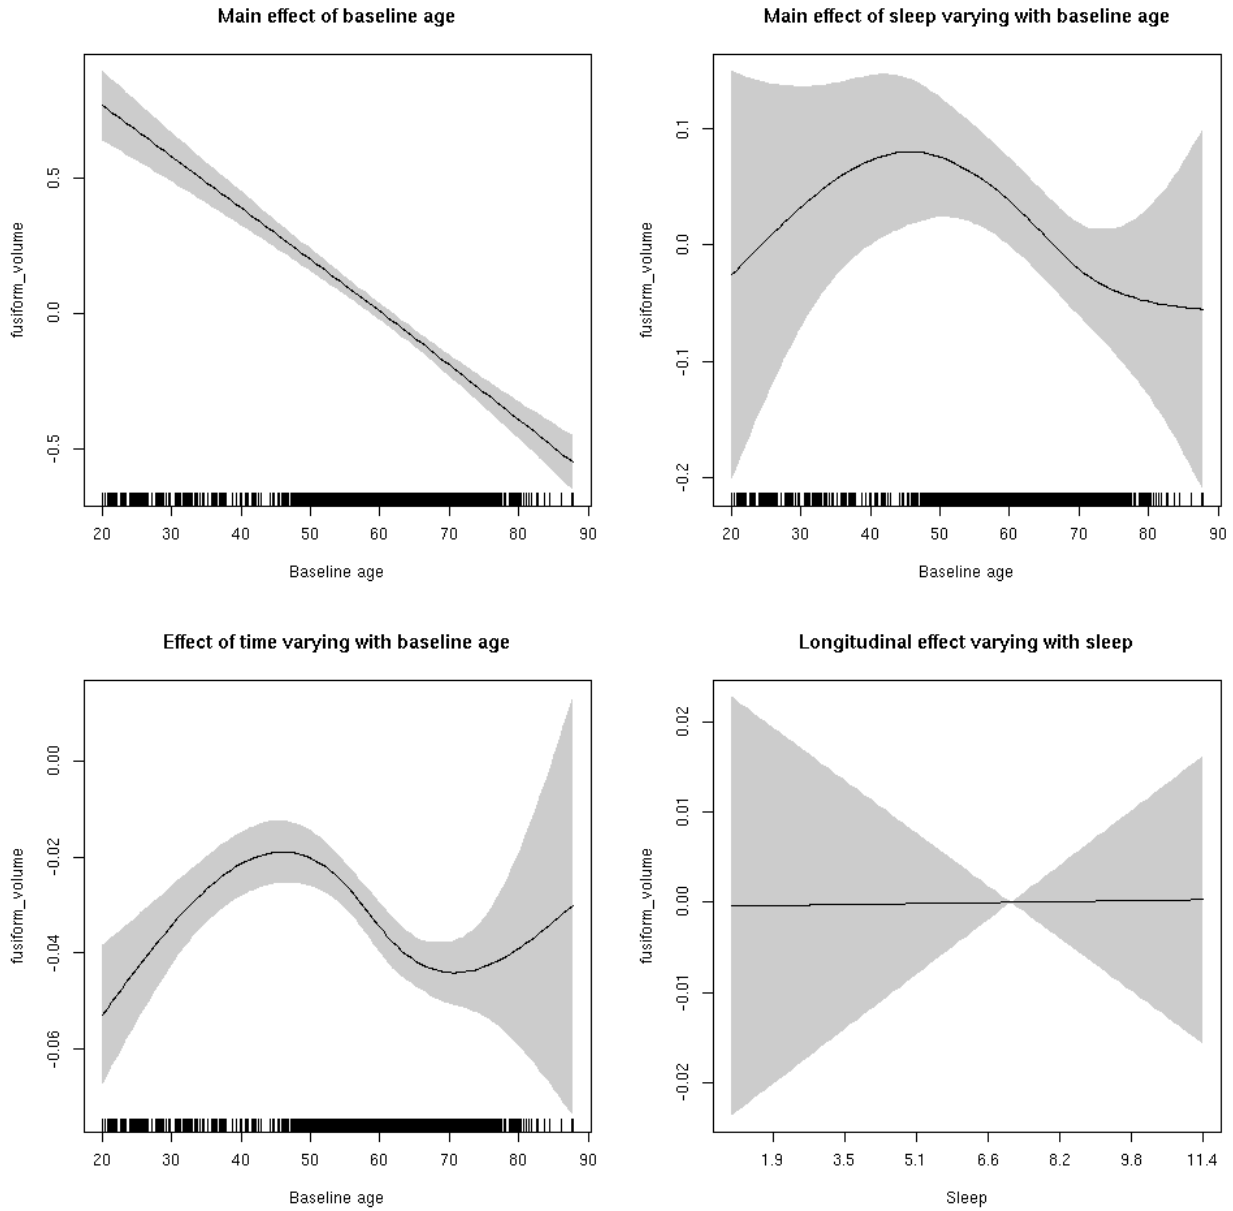

**Male: Full data** Below is the row for `s(sleep_z):time` from the model output.

```
## s(sleep_z):time  1.000  1.000  1.139  0.286
```

Below are plots of a plot of `s(bl_age)`, `s(bl_age):sleep_z`, `s(bl_age):time`, and `s(sleep_z):time`. For `s(sleep_z):time`, roughly, if we cannot fit a straight line through the confidence bands, there is evidence that the effect of time depends on sleep duration. It is correct that the confidence interval is zero at one point along the axis; this happens because we do not include the main effect.

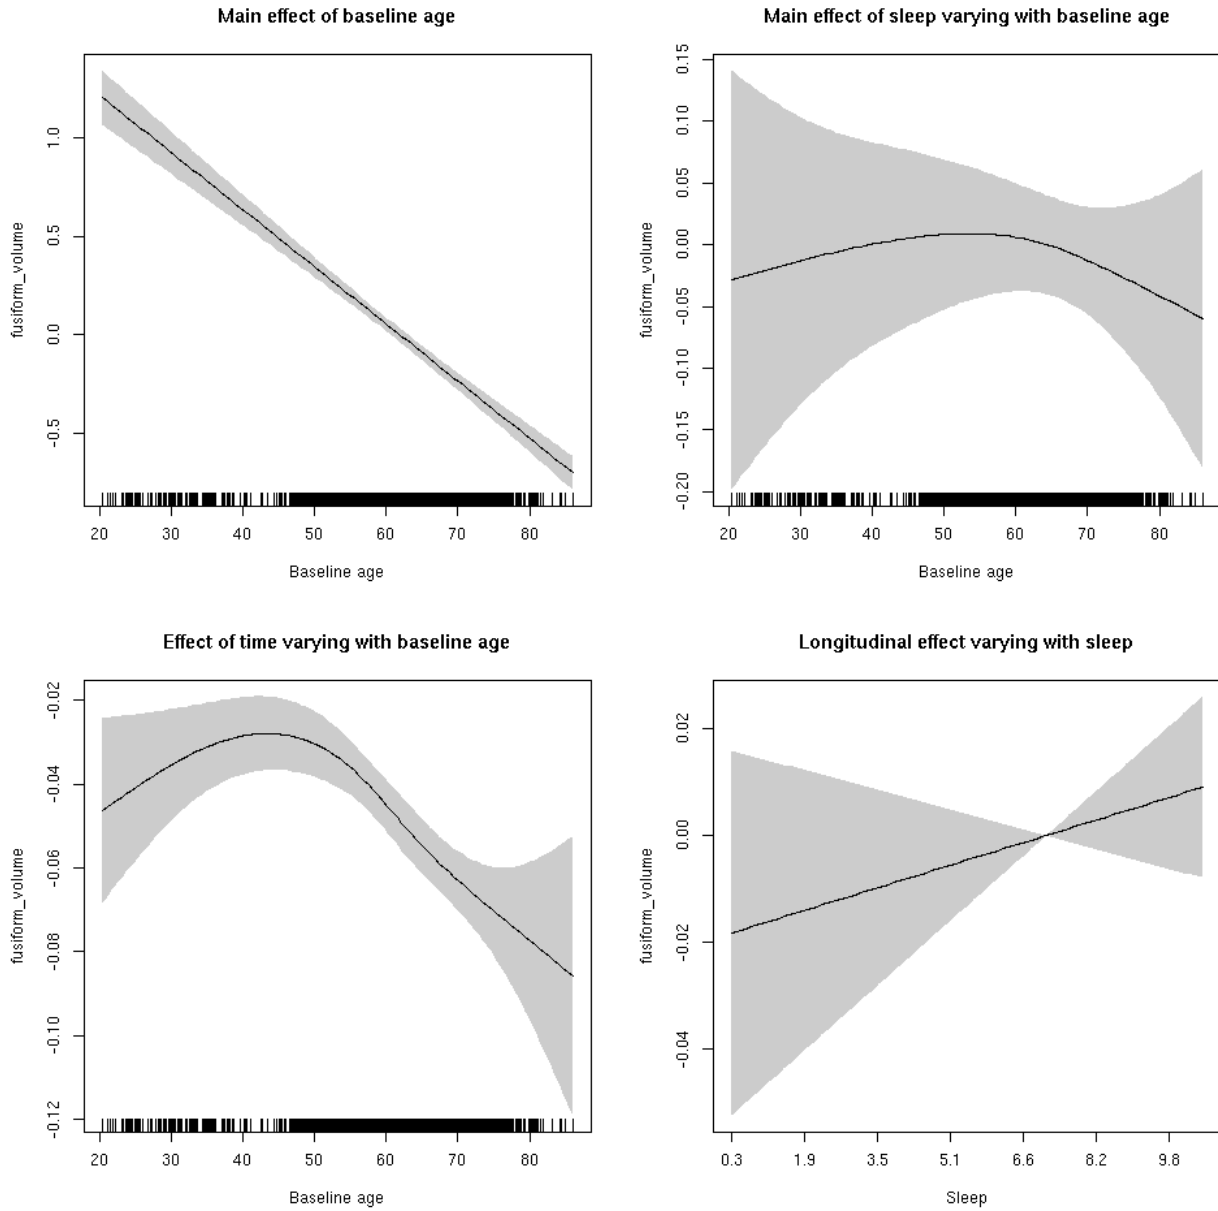

## fusiform\_volume

**Full data** Below is the model output. The term `s(sleep_z):time` is probably what we care most about.

```
##
## Family: gaussian
## Link function: identity
##
## Formula:
## value ~ sex + site + icv + s(bl_age, k = 10, bs = "cr") + s(bl_age,
##   by = sleep_z, bs = "cr") + +s(bl_age, by = time, k = 5, bs = "cr") +
##   s(sleep_z, by = time, k = 5, bs = "cr", pc = 0)
## <environment: 0x5630035a2060>
```

```

##
## Parametric coefficients:
##           Estimate Std. Error t value Pr(>|t|)
## (Intercept) -0.48209   0.05203  -9.265 < 2e-16 ***
## sexmale      0.29929   0.02703  11.072 < 2e-16 ***
## siteousAvanto -0.45788   0.06421  -7.131 1.08e-12 ***
## siteousPrisma -0.44492   0.15543  -2.862 0.00421 **
## siteousSkyra  0.25646   0.06212   4.129 3.69e-05 ***
## siteUB       -0.37476   0.12092  -3.099 0.00195 **
## siteUCAM     -0.18123   0.06478  -2.797 0.00516 **
## siteUKB      0.51270   0.04848  10.576 < 2e-16 ***
## siteUmU     -0.11521   0.07468  -1.543 0.12297
## icv         0.51226   0.01330  38.515 < 2e-16 ***
## ---
## Signif. codes:  0 '***' 0.001 '**' 0.01 '*' 0.05 '.' 0.1 ' ' 1
##
## Approximate significance of smooth terms:
##           edf Ref.df      F p-value
## s(bl_age)      1.000  1.000 534.375 <2e-16 ***
## s(bl_age):sleep_z 3.380  3.380   3.400 0.0208 *
## s(bl_age):time  4.109  4.109 205.216 <2e-16 ***
## s(sleep_z):time  1.000  1.000   0.613 0.4337
## ---
## Signif. codes:  0 '***' 0.001 '**' 0.01 '*' 0.05 '.' 0.1 ' ' 1
##
## R-sq.(adj) = 0.546
## lmer.REML = 8712.4 Scale est. = 0.033805 n = 8174

```

Below are plots of a plot of `s(bl_age)`, `s(bl_age):sleep_z`, `s(bl_age):time`, and `s(sleep_z):time`. For `s(sleep_z):time`, roughly, if we cannot fit a straight line through the confidence bands, there is evidence that the effect of time depends on sleep duration. It is correct that the confidence interval is zero at one point along the axis; this happens because we do not include the main effect.

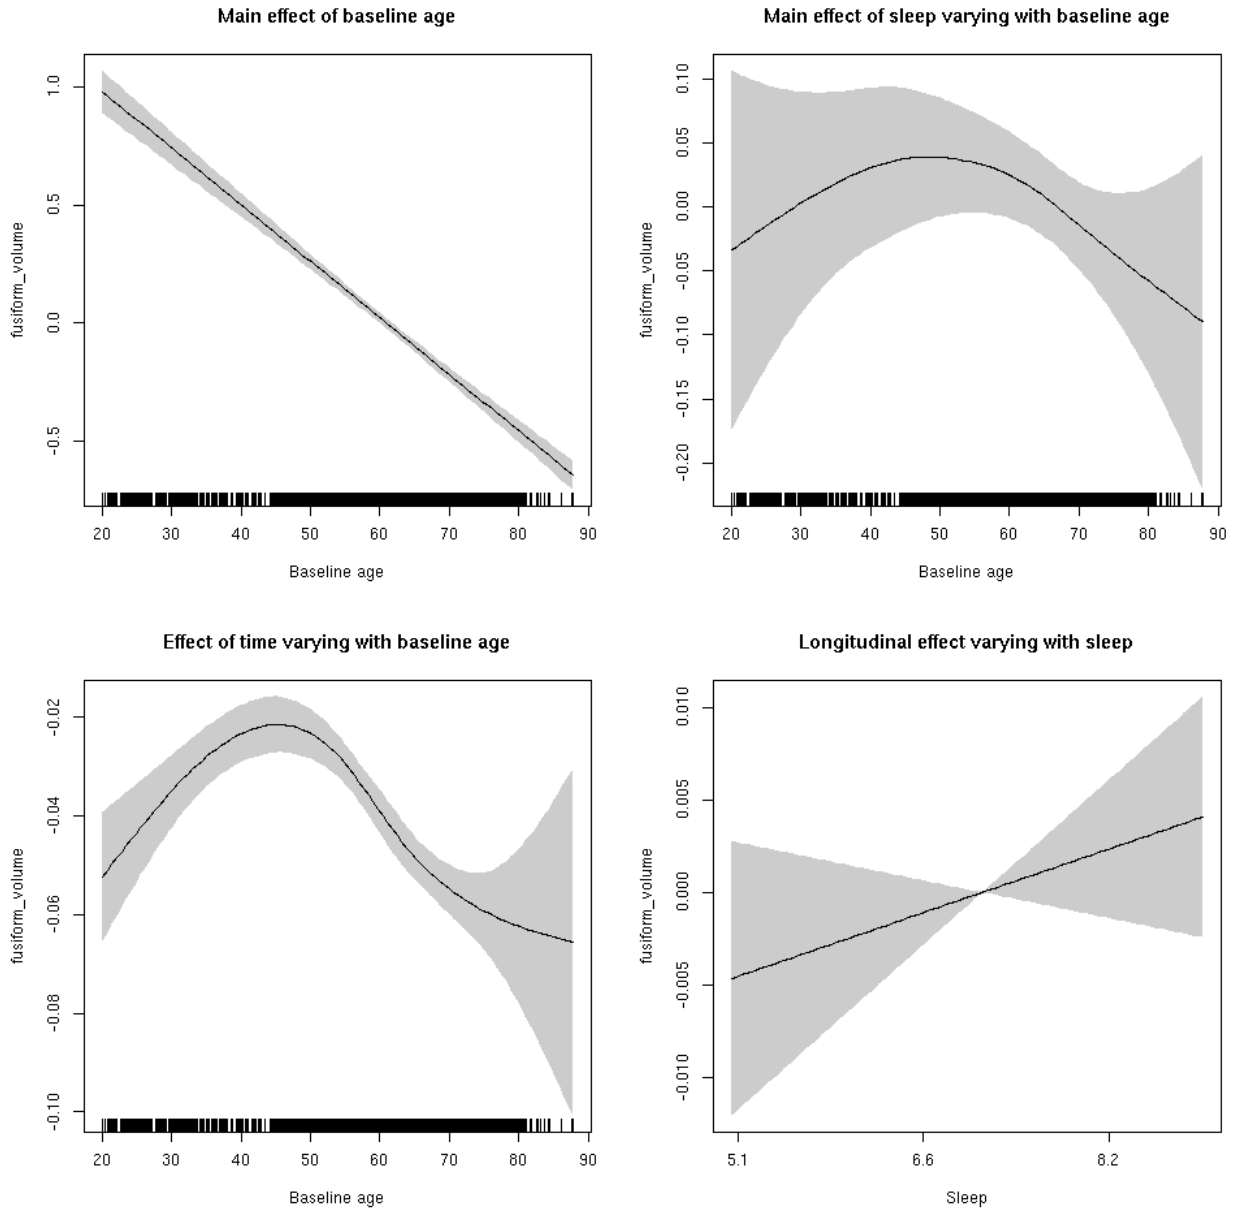

**Restricted to sleep  $\geq 5$  and  $\leq 9$  hours** Below is the row for `s(sleep_z):time` from the model output.

```
## s(sleep_z):time  1.000  1.000  1.571  0.210
```

Below are plots of a plot of `s(bl_age)`, `s(bl_age):sleep_z`, `s(bl_age):time`, and `s(sleep_z):time`. For `s(sleep_z):time`, roughly, if we cannot fit a straight line through the confidence bands, there is evidence that the effect of time depends on sleep duration. It is correct that the confidence interval is zero at one point along the axis; this happens because we do not include the main effect.

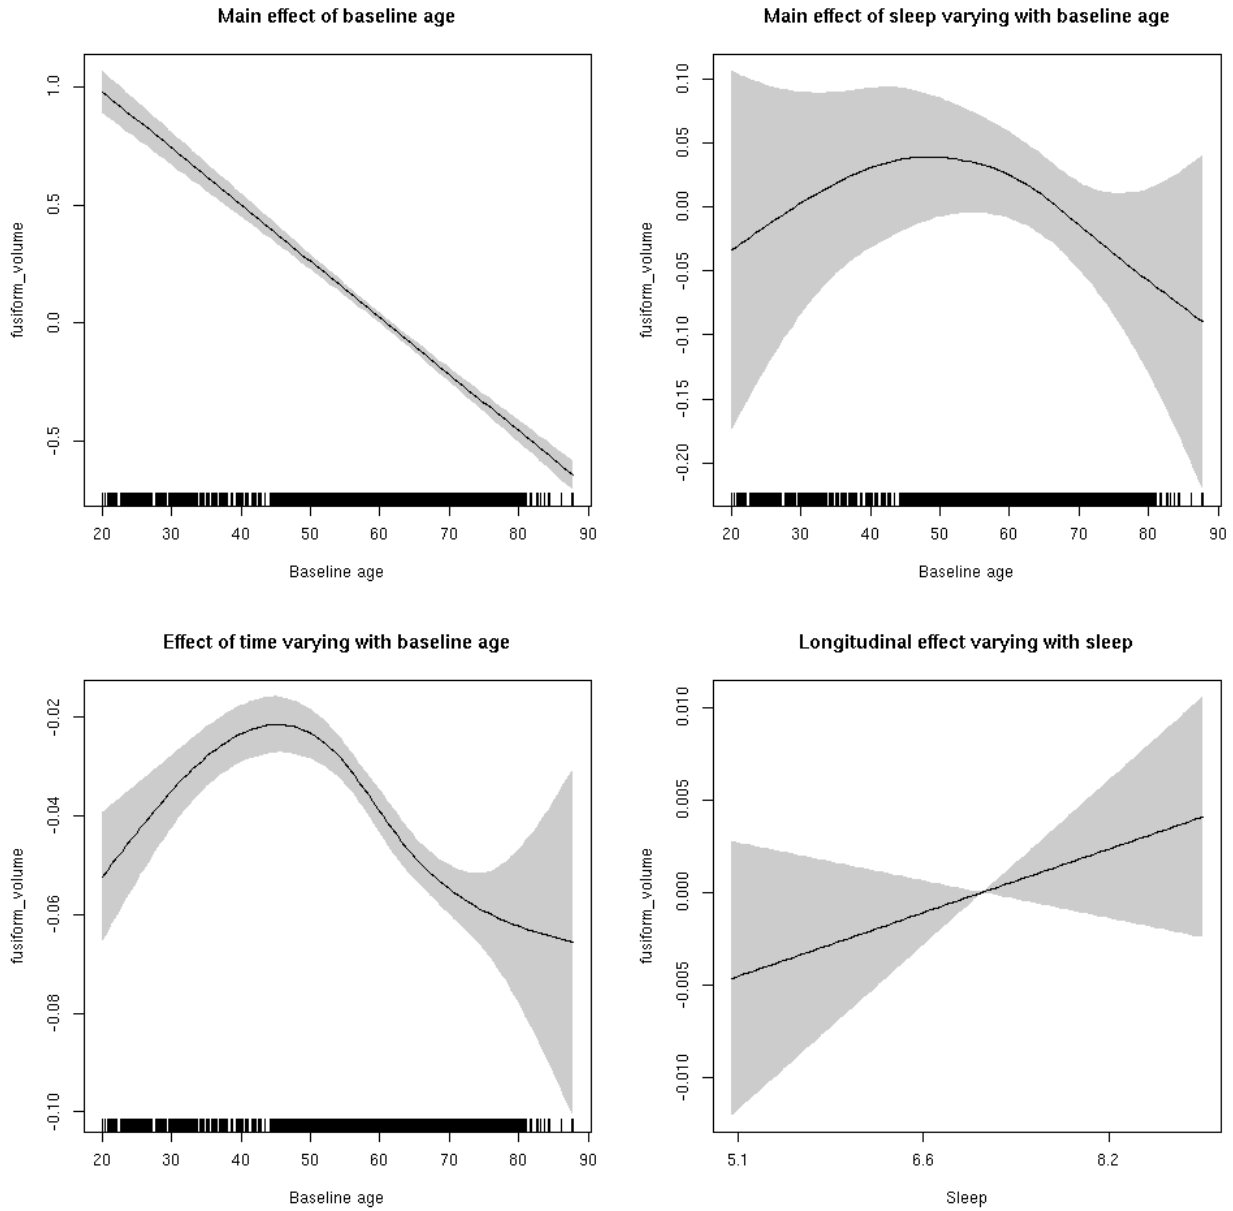

### inferiorparietal\_area: Stratified by sex

**Female: Full data** Below is the row for `s(sleep_z):time` from the model output.

```
## s(sleep_z):time  1.000  1.000  0.233  0.629
```

Below are plots of a plot of `s(bl_age)`, `s(bl_age):sleep_z`, `s(bl_age):time`, and `s(sleep_z):time`. For `s(sleep_z):time`, roughly, if we cannot fit a straight line through the confidence bands, there is evidence that the effect of time depends on sleep duration. It is correct that the confidence interval is zero at one point along the axis; this happens because we do not include the main effect.

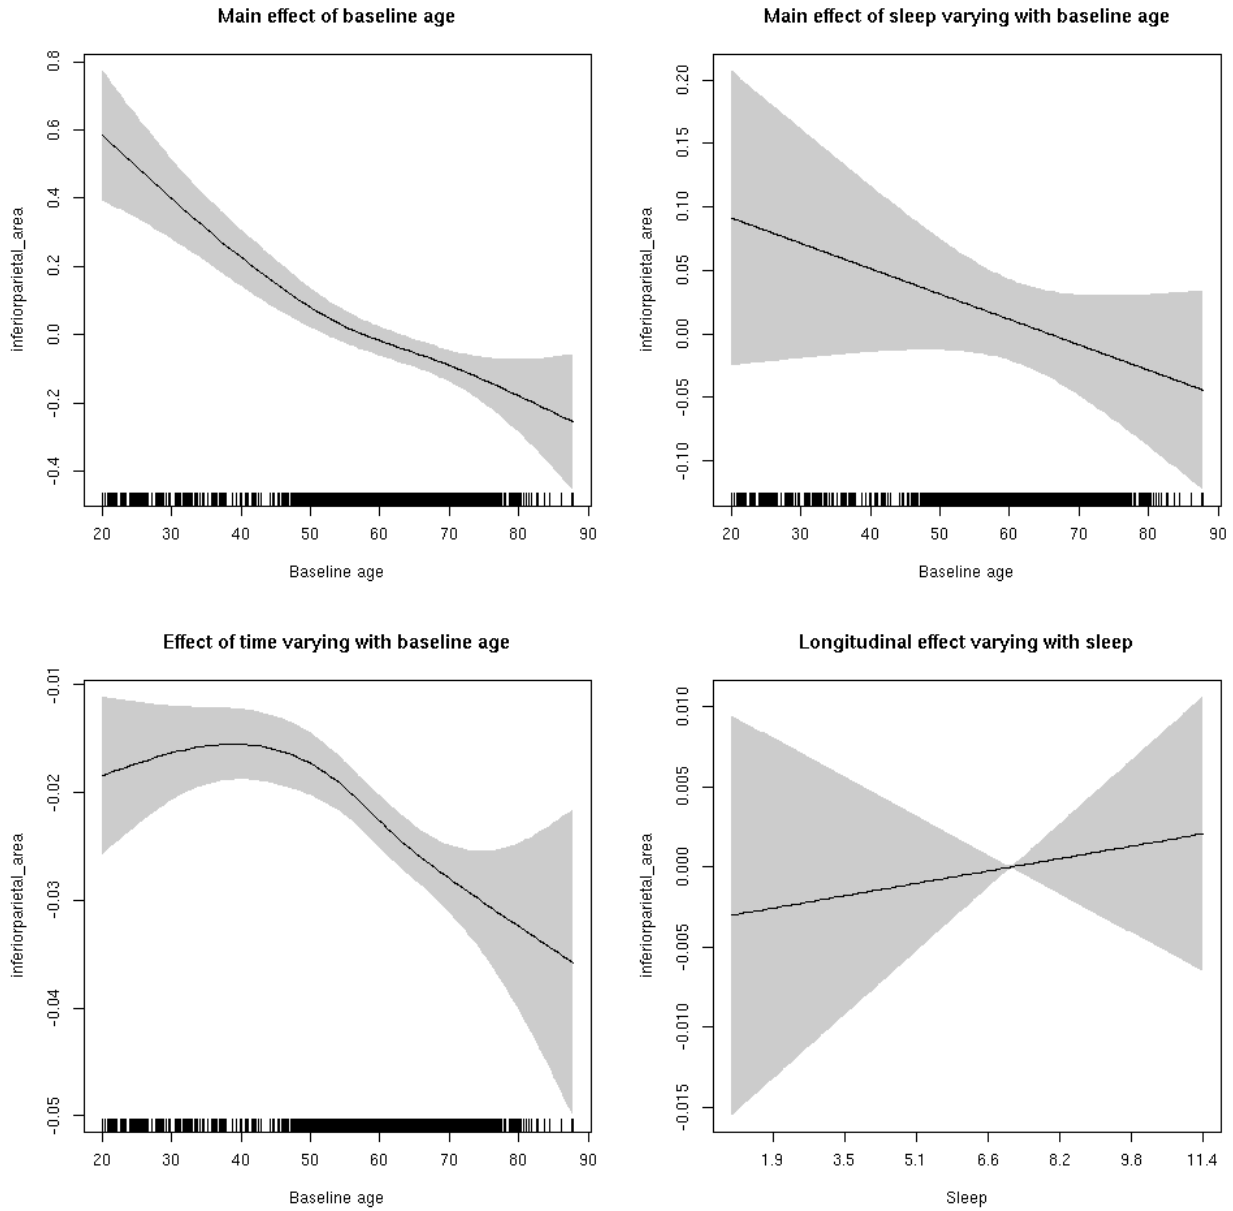

**Male: Full data** Below is the row for `s(sleep_z):time` from the model output.

```
## s(sleep_z):time  1.000  1.000  0.717  0.397
```

Below are plots of a plot of `s(bl_age)`, `s(bl_age):sleep_z`, `s(bl_age):time`, and `s(sleep_z):time`. For `s(sleep_z):time`, roughly, if we cannot fit a straight line through the confidence bands, there is evidence that the effect of time depends on sleep duration. It is correct that the confidence interval is zero at one point along the axis; this happens because we do not include the main effect.

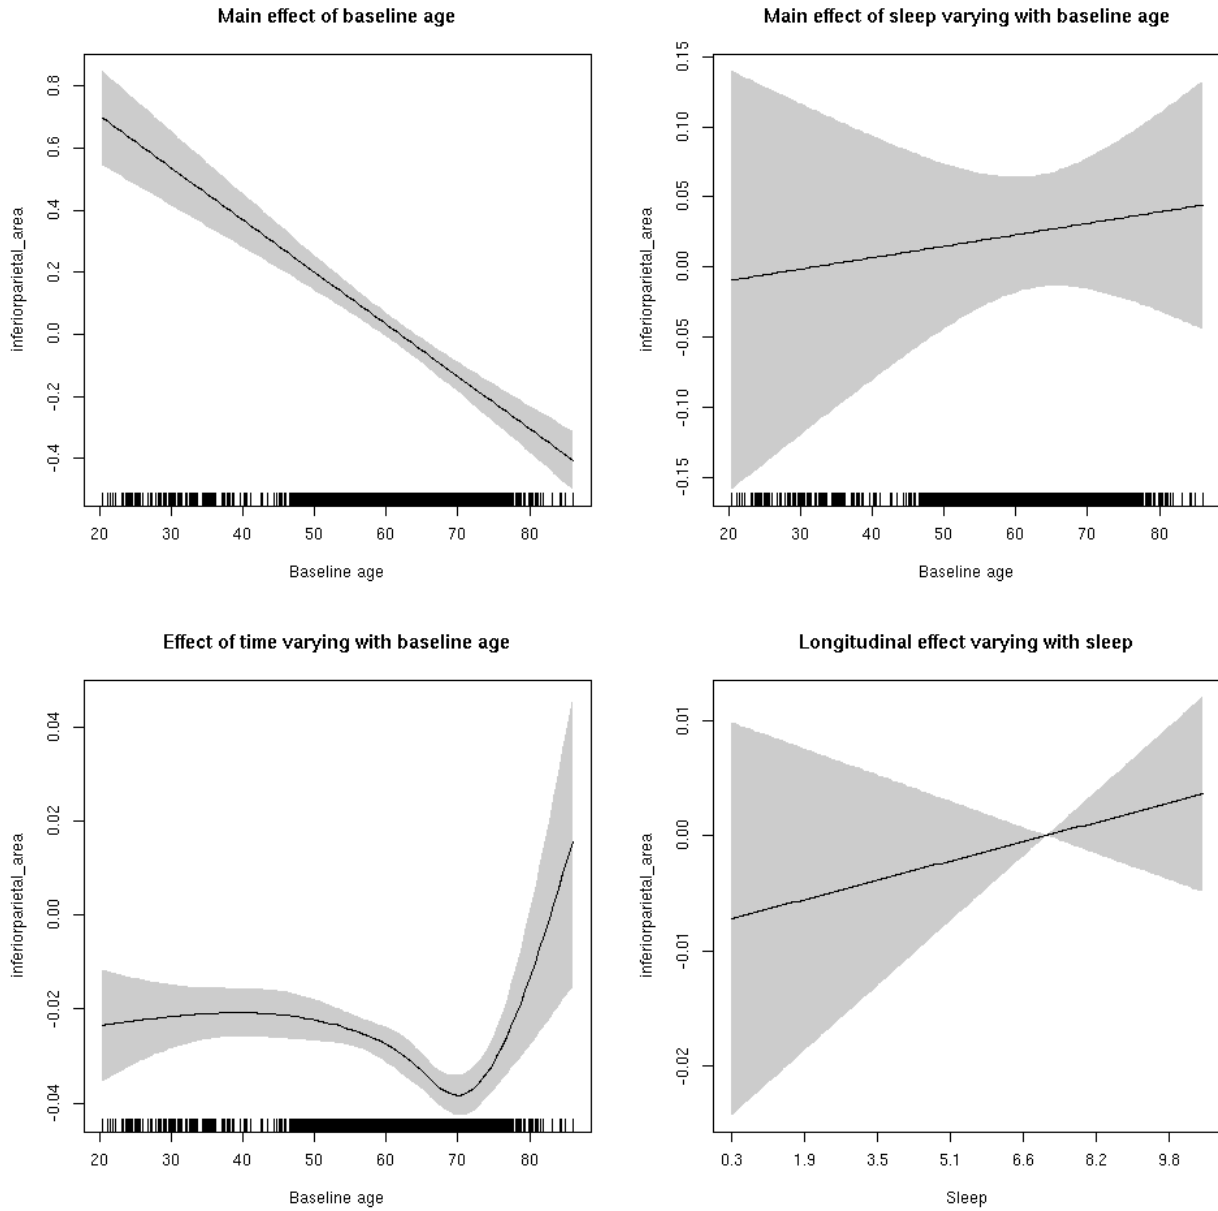

## inferiorparietal\_area

**Full data** Below is the model output. The term `s(sleep_z):time` is probably what we care most about.

```
##
## Family: gaussian
## Link function: identity
##
## Formula:
## value ~ sex + site + icv + s(bl_age, k = 10, bs = "cr") + s(bl_age,
##   by = sleep_z, bs = "cr") + +s(bl_age, by = time, k = 5, bs = "cr") +
##   s(sleep_z, by = time, k = 5, bs = "cr", pc = 0)
## <environment: 0x5630035a3768>
```



```

##
## Parametric coefficients:
##           Estimate Std. Error t value Pr(>|t|)
## (Intercept)  0.78687    0.05740  13.710 < 2e-16 ***
## sexmale      0.22658    0.02947   7.687 1.68e-14 ***
## siteousAvanto -0.75593    0.06991 -10.812 < 2e-16 ***
## siteousPrisma -0.76380    0.10282  -7.428 1.21e-13 ***
## siteousSkyra  -0.18162    0.06788  -2.676 0.00747 **
## siteUB       -1.02948    0.13409  -7.677 1.81e-14 ***
## siteUCAM     -0.87324    0.07195 -12.137 < 2e-16 ***
## siteUKB      -0.90011    0.05479 -16.430 < 2e-16 ***
## siteUmU      -0.05742    0.08277  -0.694 0.48786
## icv          0.51781    0.01403  36.899 < 2e-16 ***
## ---
## Signif. codes:  0 '***' 0.001 '**' 0.01 '*' 0.05 '.' 0.1 ' ' 1
##
## Approximate significance of smooth terms:
##           edf Ref.df      F p-value
## s(bl_age)      3.296  3.296 45.108 <2e-16 ***
## s(bl_age):sleep_z 2.000  2.000  0.655  0.519
## s(bl_age):time  4.336  4.336 269.265 <2e-16 ***
## s(sleep_z):time 1.000  1.000  0.699  0.403
## ---
## Signif. codes:  0 '***' 0.001 '**' 0.01 '*' 0.05 '.' 0.1 ' ' 1
##
## R-sq.(adj) = 0.442
## lmer.REML = 3789.5 Scale est. = 0.008913 n = 8155

```

Below are plots of a plot of  $s(\text{bl\_age})$ ,  $s(\text{bl\_age}):\text{sleep\_z}$ ,  $s(\text{bl\_age}):\text{time}$ , and  $s(\text{sleep\_z}):\text{time}$ . For  $s(\text{sleep\_z}):\text{time}$ , roughly, if we cannot fit a straight line through the confidence bands, there is evidence that the effect of time depends on sleep duration. It is correct that the confidence interval is zero at one point along the axis; this happens because we do not include the main effect.

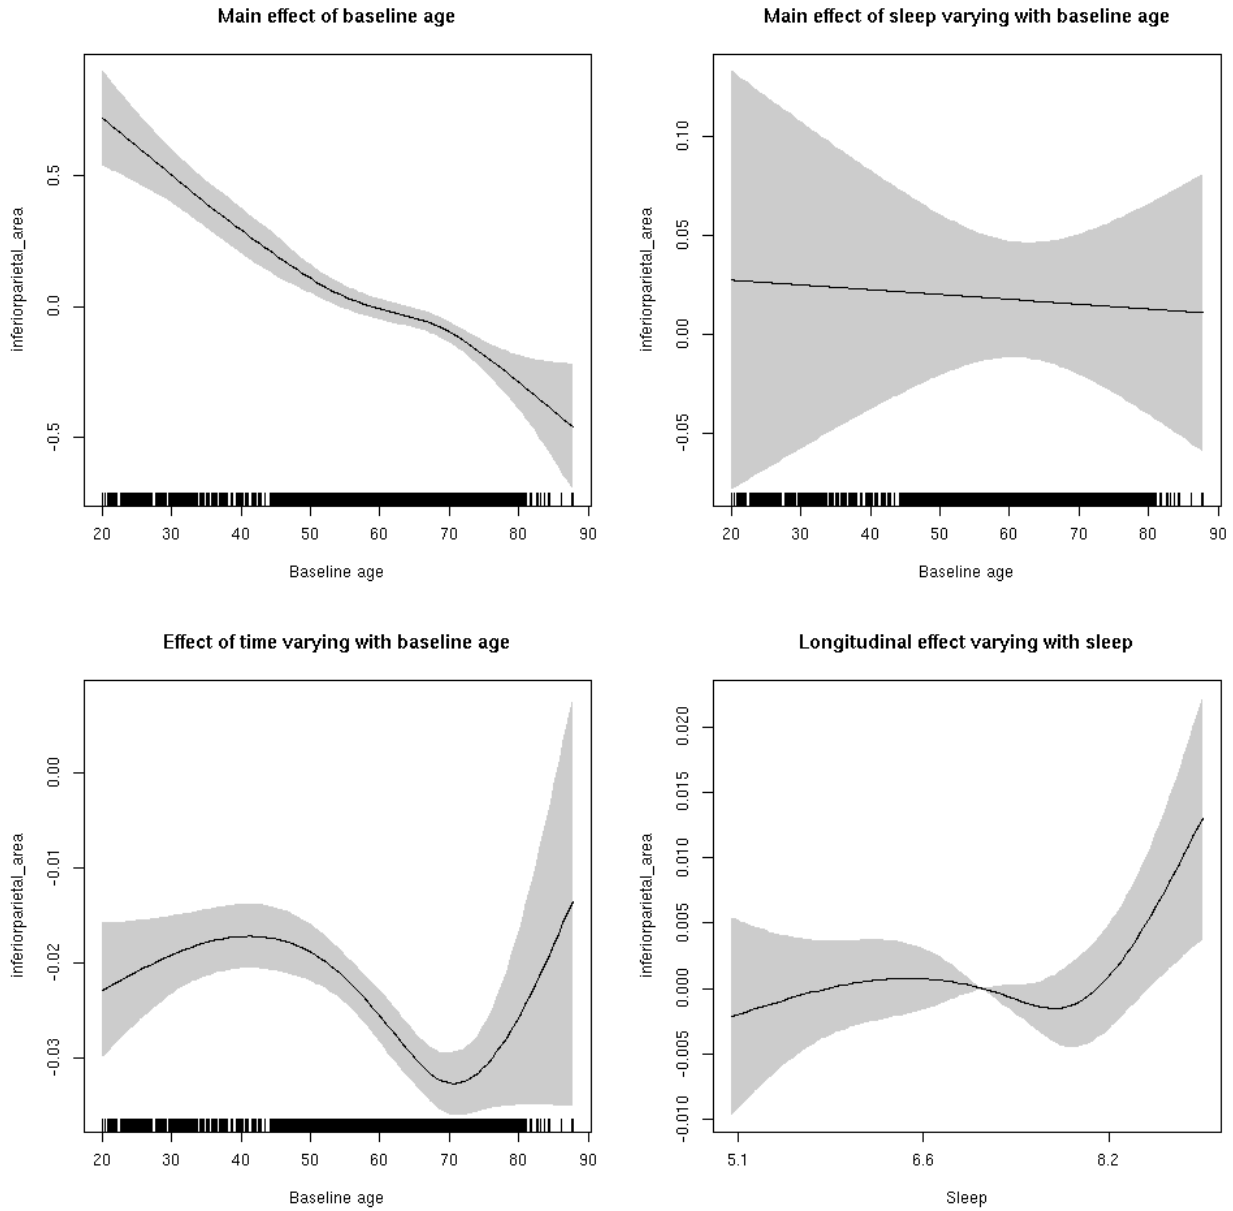

**Restricted to sleep  $\geq 5$  and  $\leq 9$  hours** Below is the row for `s(sleep_z):time` from the model output.

```
## s(sleep_z):time  3.185  3.185  1.103  0.199
```

Below are plots of a plot of `s(bl_age)`, `s(bl_age):sleep_z`, `s(bl_age):time`, and `s(sleep_z):time`. For `s(sleep_z):time`, roughly, if we cannot fit a straight line through the confidence bands, there is evidence that the effect of time depends on sleep duration. It is correct that the confidence interval is zero at one point along the axis; this happens because we do not include the main effect.



## inferiorparietal\_thickness: Stratified by sex

**Female: Full data** Below is the row for `s(sleep_z):time` from the model output.

```
## s(sleep_z):time  3.505  3.505  3.336 0.00894 **
```

Below are plots of a plot of `s(bl_age)`, `s(bl_age):sleep_z`, `s(bl_age):time`, and `s(sleep_z):time`. For `s(sleep_z):time`, roughly, if we cannot fit a straight line through the confidence bands, there is evidence that the effect of time depends on sleep duration. It is correct that the confidence interval is zero at one point along the axis; this happens because we do not include the main effect.

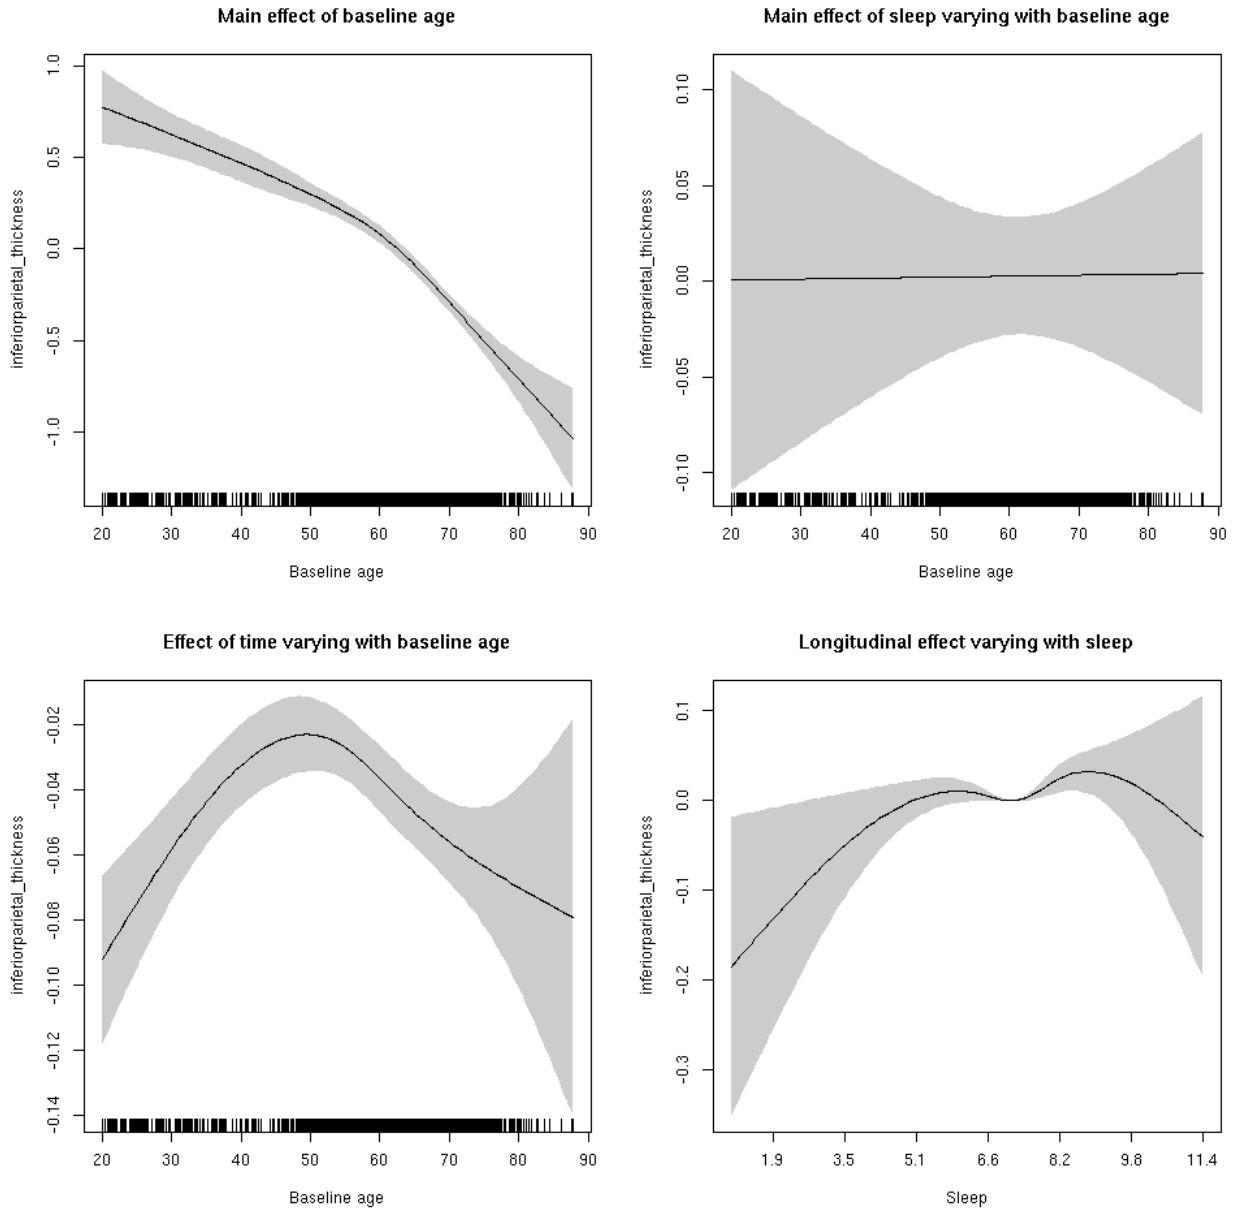

**Male: Full data** Below is the row for `s(sleep_z):time` from the model output.

```
## s(sleep_z):time  1.000  1.000  0.475  0.491
```

Below are plots of a plot of `s(bl_age)`, `s(bl_age):sleep_z`, `s(bl_age):time`, and `s(sleep_z):time`. For `s(sleep_z):time`, roughly, if we cannot fit a straight line through the confidence bands, there is evidence that the effect of time depends on sleep duration. It is correct that the confidence interval is zero at one point along the axis; this happens because we do not include the main effect.

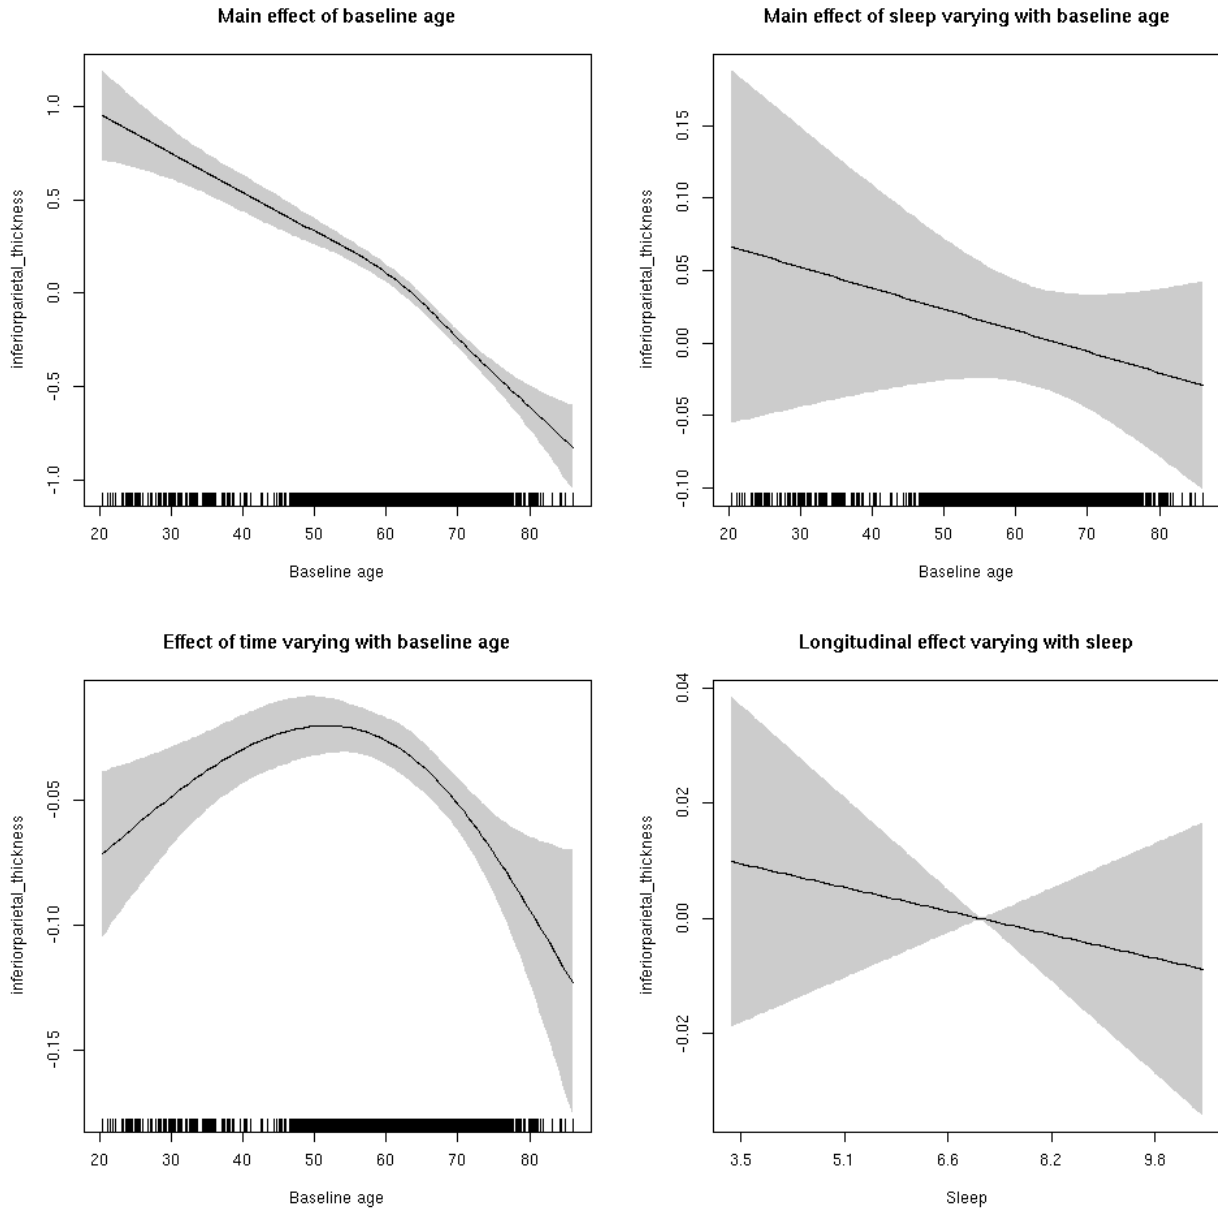

## inferiorparietal\_thickness

**Full data** Below is the model output. The term `s(sleep_z):time` is probably what we care most about.

```
##
## Family: gaussian
## Link function: identity
##
## Formula:
## value ~ sex + site + s(bl_age, k = 10, bs = "cr") + s(bl_age,
##   by = sleep_z, bs = "cr") + +s(bl_age, by = time, k = 5, bs = "cr") +
##   s(sleep_z, by = time, k = 5, bs = "cr", pc = 0)
## <environment: 0x5630035cb810>
```

```

##
## Parametric coefficients:
##           Estimate Std. Error t value Pr(>|t|)
## (Intercept) -1.87946    0.04280 -43.911 < 2e-16 ***
## sexmale     -0.08125    0.02146  -3.786 0.000154 ***
## siteousAvanto  0.27077    0.05671   4.775 1.83e-06 ***
## siteousPrisma  0.74286    0.23042   3.224 0.001269 **
## siteousSkyra  -0.01915    0.05668  -0.338 0.735534
## siteUB       0.70319    0.11375   6.182 6.63e-10 ***
## siteUCAM     0.67956    0.05904  11.510 < 2e-16 ***
## siteUKB     2.21319    0.04342  50.972 < 2e-16 ***
## siteUmU     -0.24799    0.07055  -3.515 0.000442 ***
## ---
## Signif. codes:  0 '***' 0.001 '**' 0.01 '*' 0.05 '.' 0.1 ' ' 1
##
## Approximate significance of smooth terms:
##           edf Ref.df      F p-value
## s(bl_age)      3.877  3.877 194.381 <2e-16 ***
## s(bl_age):sleep_z 2.000  2.000   0.310   0.733
## s(bl_age):time  3.888  3.888  75.048 <2e-16 ***
## s(sleep_z):time  1.000  1.000   0.571   0.450
## ---
## Signif. codes:  0 '***' 0.001 '**' 0.01 '*' 0.05 '.' 0.1 ' ' 1
##
## R-sq.(adj) =  0.663
## lmer.REML = 12514 Scale est. = 0.089784 n = 8165

```

Below are plots of a plot of `s(bl_age)`, `s(bl_age):sleep_z`, `s(bl_age):time`, and `s(sleep_z):time`. For `s(sleep_z):time`, roughly, if we cannot fit a straight line through the confidence bands, there is evidence that the effect of time depends on sleep duration. It is correct that the confidence interval is zero at one point along the axis; this happens because we do not include the main effect.

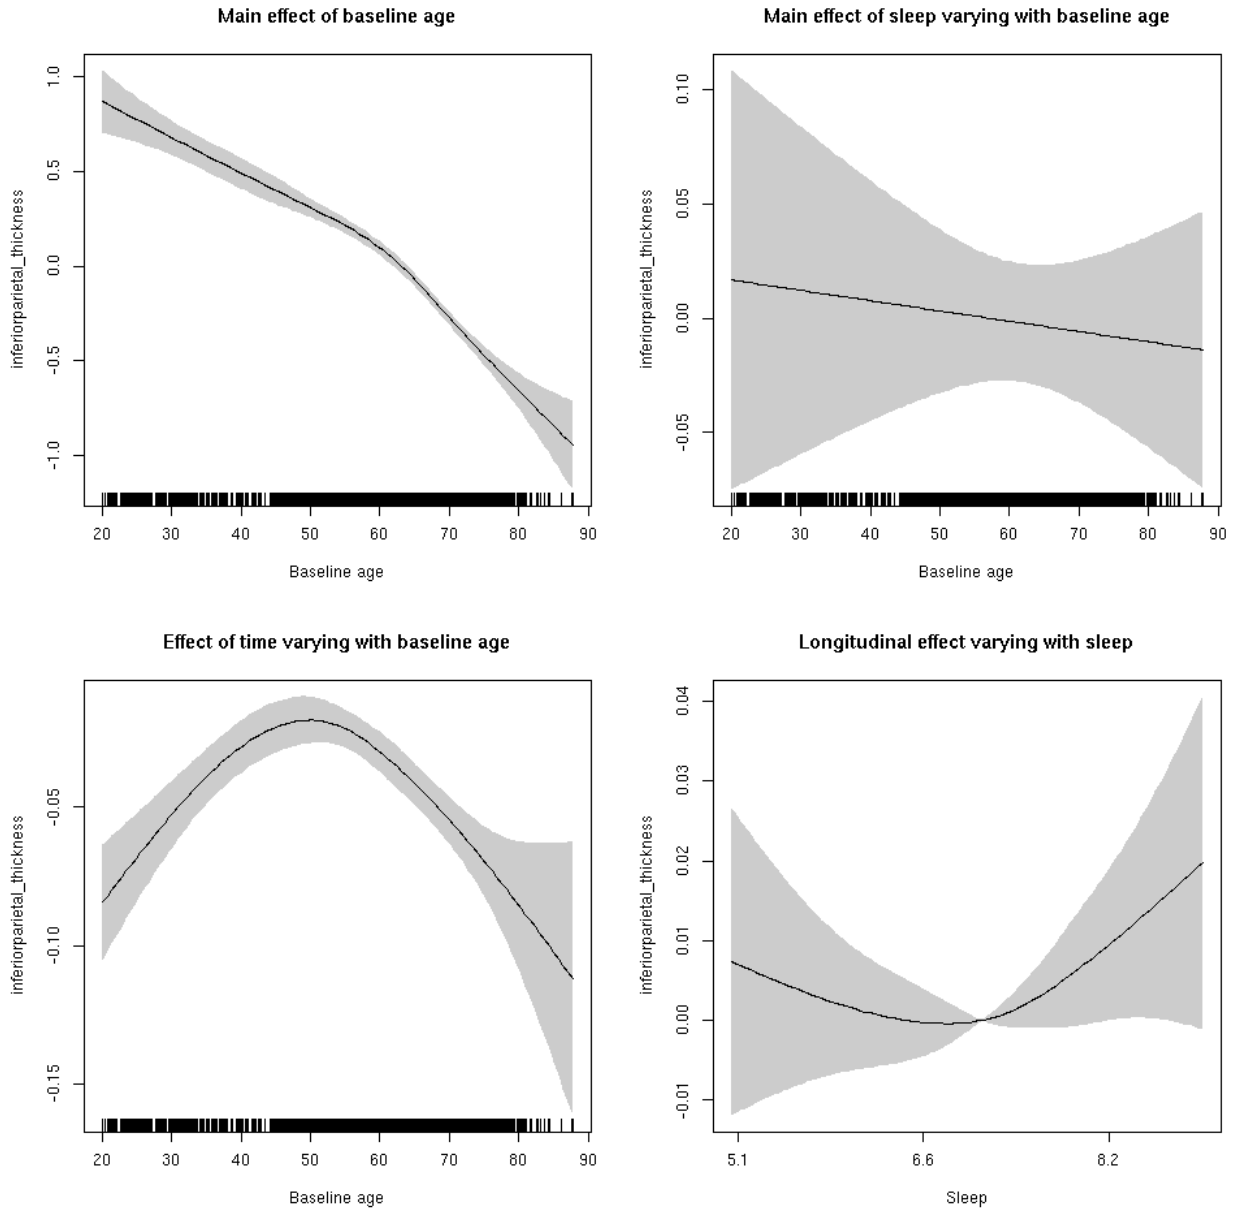

**Restricted to sleep  $\geq 5$  and  $\leq 9$  hours** Below is the row for `s(sleep_z):time` from the model output.

```
## s(sleep_z):time  1.992  1.992  2.072  0.112
```

Below are plots of a plot of `s(bl_age)`, `s(bl_age):sleep_z`, `s(bl_age):time`, and `s(sleep_z):time`. For `s(sleep_z):time`, roughly, if we cannot fit a straight line through the confidence bands, there is evidence that the effect of time depends on sleep duration. It is correct that the confidence interval is zero at one point along the axis; this happens because we do not include the main effect.



## inferiorparietal\_volume: Stratified by sex

**Female: Full data** Below is the row for `s(sleep_z):time` from the model output.

```
## s(sleep_z):time  1.000  1.000  1.069  0.301
```

Below are plots of a plot of `s(bl_age)`, `s(bl_age):sleep_z`, `s(bl_age):time`, and `s(sleep_z):time`. For `s(sleep_z):time`, roughly, if we cannot fit a straight line through the confidence bands, there is evidence that the effect of time depends on sleep duration. It is correct that the confidence interval is zero at one point along the axis; this happens because we do not include the main effect.



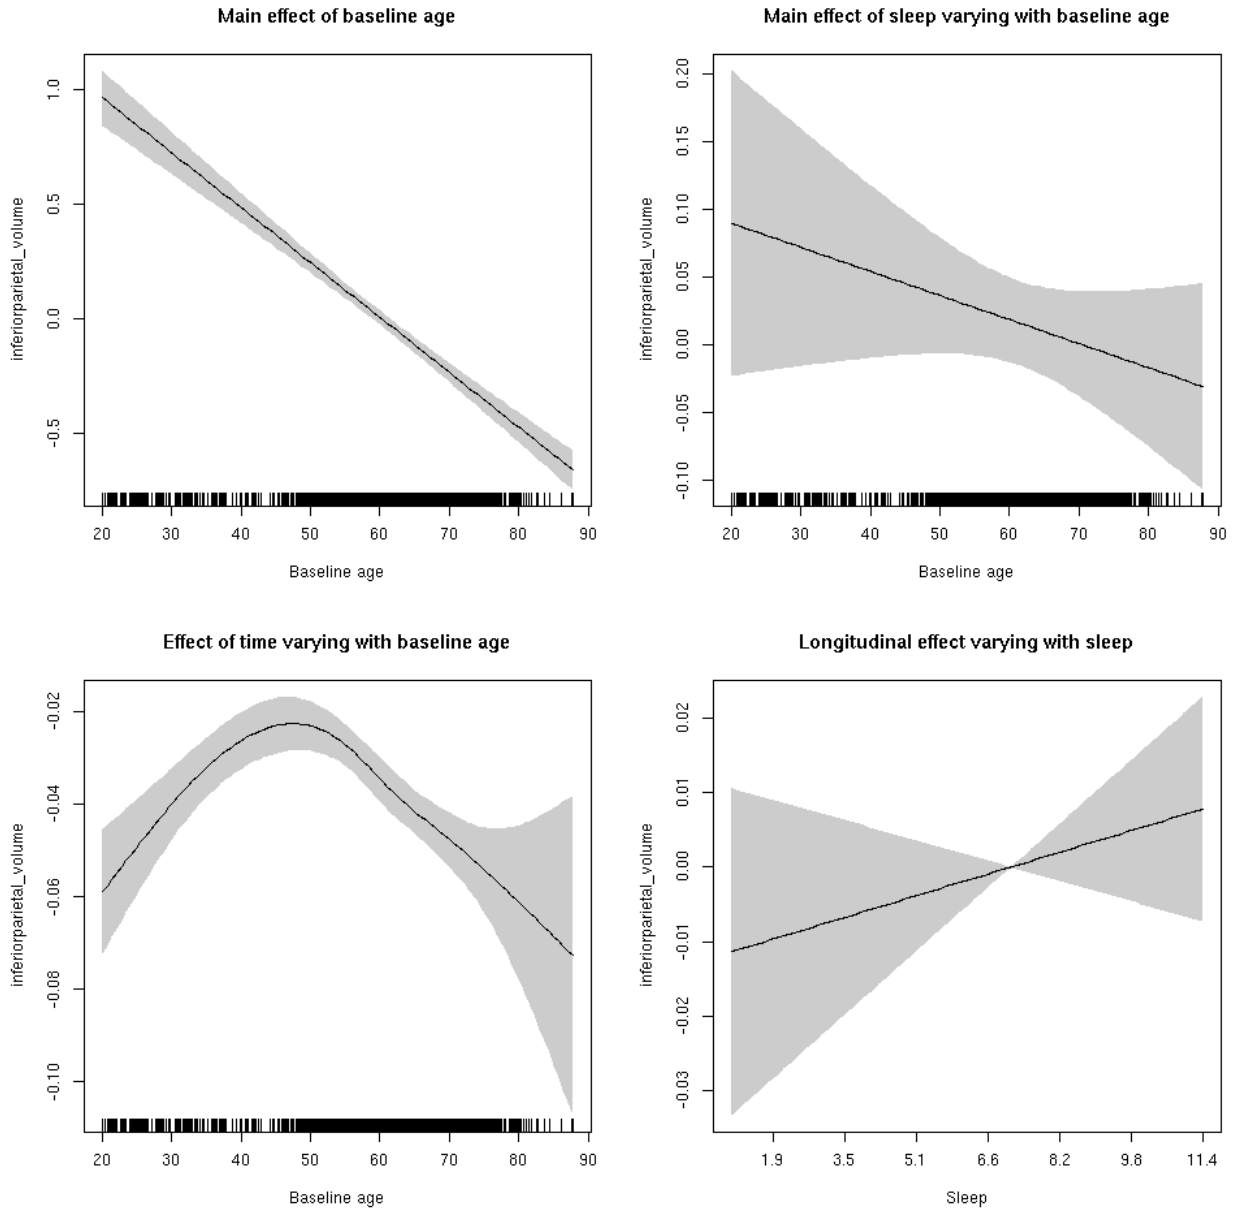

**Male: Full data** Below is the row for `s(sleep_z):time` from the model output.

```
## s(sleep_z):time  1.000  1.000  0.041  0.839
```

Below are plots of a plot of `s(bl_age)`, `s(bl_age):sleep_z`, `s(bl_age):time`, and `s(sleep_z):time`. For `s(sleep_z):time`, roughly, if we cannot fit a straight line through the confidence bands, there is evidence that the effect of time depends on sleep duration. It is correct that confidence interval is zero at one point along the axis; this happens because we do not include the main effect.

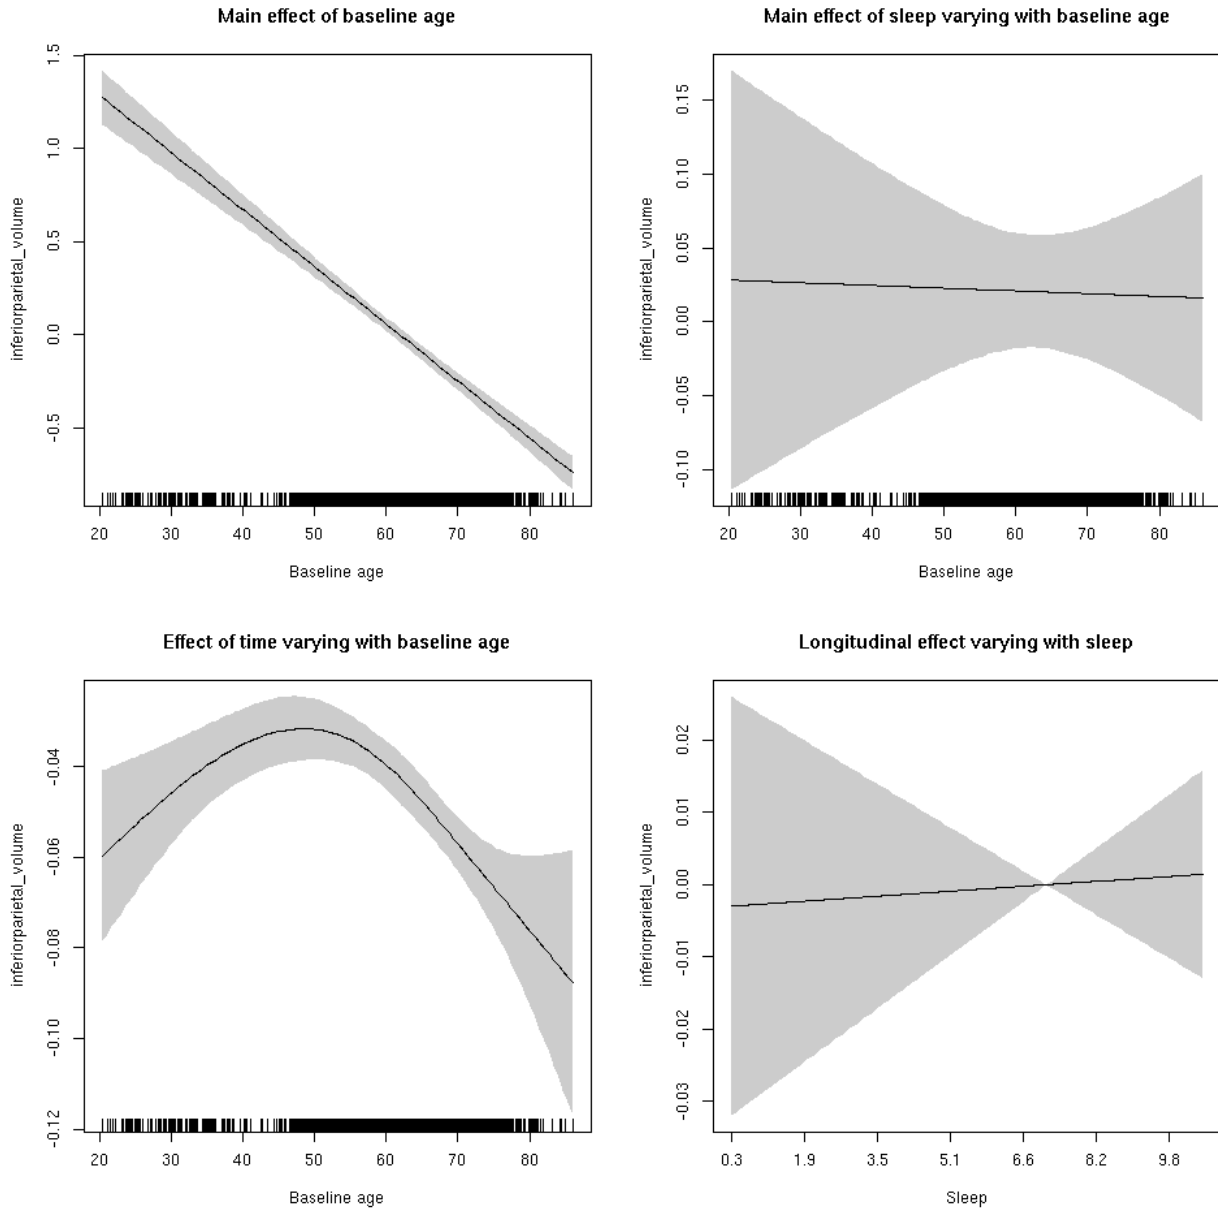

## inferiorparietal\_volume

**Full data** Below is the model output. The term `s(sleep_z):time` is probably what we care most about.

```
##
## Family: gaussian
## Link function: identity
##
## Formula:
## value ~ sex + site + icv + s(bl_age, k = 10, bs = "cr") + s(bl_age,
##   by = sleep_z, bs = "cr") + +s(bl_age, by = time, k = 5, bs = "cr") +
##   s(sleep_z, by = time, k = 5, bs = "cr", pc = 0)
## <environment: 0x5630035b8648>
```

```

##
## Parametric coefficients:
##           Estimate Std. Error t value Pr(>|t|)
## (Intercept)  0.06807   0.05589   1.218  0.22330
## sexmale      0.11930   0.02872   4.154 3.29e-05 ***
## siteousAvanto -0.69408   0.06811 -10.191 < 2e-16 ***
## siteousPrisma -0.44114   0.14361  -3.072  0.00214 **
## siteousSkyra  -0.18409   0.06599  -2.790  0.00529 **
## siteUB       -0.61675   0.12892  -4.784 1.75e-06 ***
## siteUCAM     -0.60526   0.06936  -8.726 < 2e-16 ***
## siteUKB      0.01147   0.05310   0.216  0.82894
## siteUmU     -0.21445   0.07982  -2.687  0.00723 **
## icv         0.54757   0.01409  38.854 < 2e-16 ***
## ---
## Signif. codes:  0 '***' 0.001 '**' 0.01 '*' 0.05 '.' 0.1 ' ' 1
##
## Approximate significance of smooth terms:
##           edf Ref.df      F p-value
## s(bl_age)      3.130  3.130 194.646 < 2e-16 ***
## s(bl_age):sleep_z 2.000  2.000   1.170 0.31050
## s(bl_age):time  4.041  4.041 163.379 < 2e-16 ***
## s(sleep_z):time  3.667  3.667   4.093 0.00214 **
## ---
## Signif. codes:  0 '***' 0.001 '**' 0.01 '*' 0.05 '.' 0.1 ' ' 1
##
## R-sq.(adj) =  0.475
## lmer.REML = 8162.8  Scale est. = 0.026561  n = 8168

```

Below are plots of a plot of  $s(\text{bl\_age})$ ,  $s(\text{bl\_age}):\text{sleep\_z}$ ,  $s(\text{bl\_age}):\text{time}$ , and  $s(\text{sleep\_z}):\text{time}$ . For  $s(\text{sleep\_z}):\text{time}$ , roughly, if we cannot fit a straight line through the confidence bands, there is evidence that the effect of time depends on sleep duration. It is correct that the confidence interval is zero at one point along the axis; this happens because we do not include the main effect.

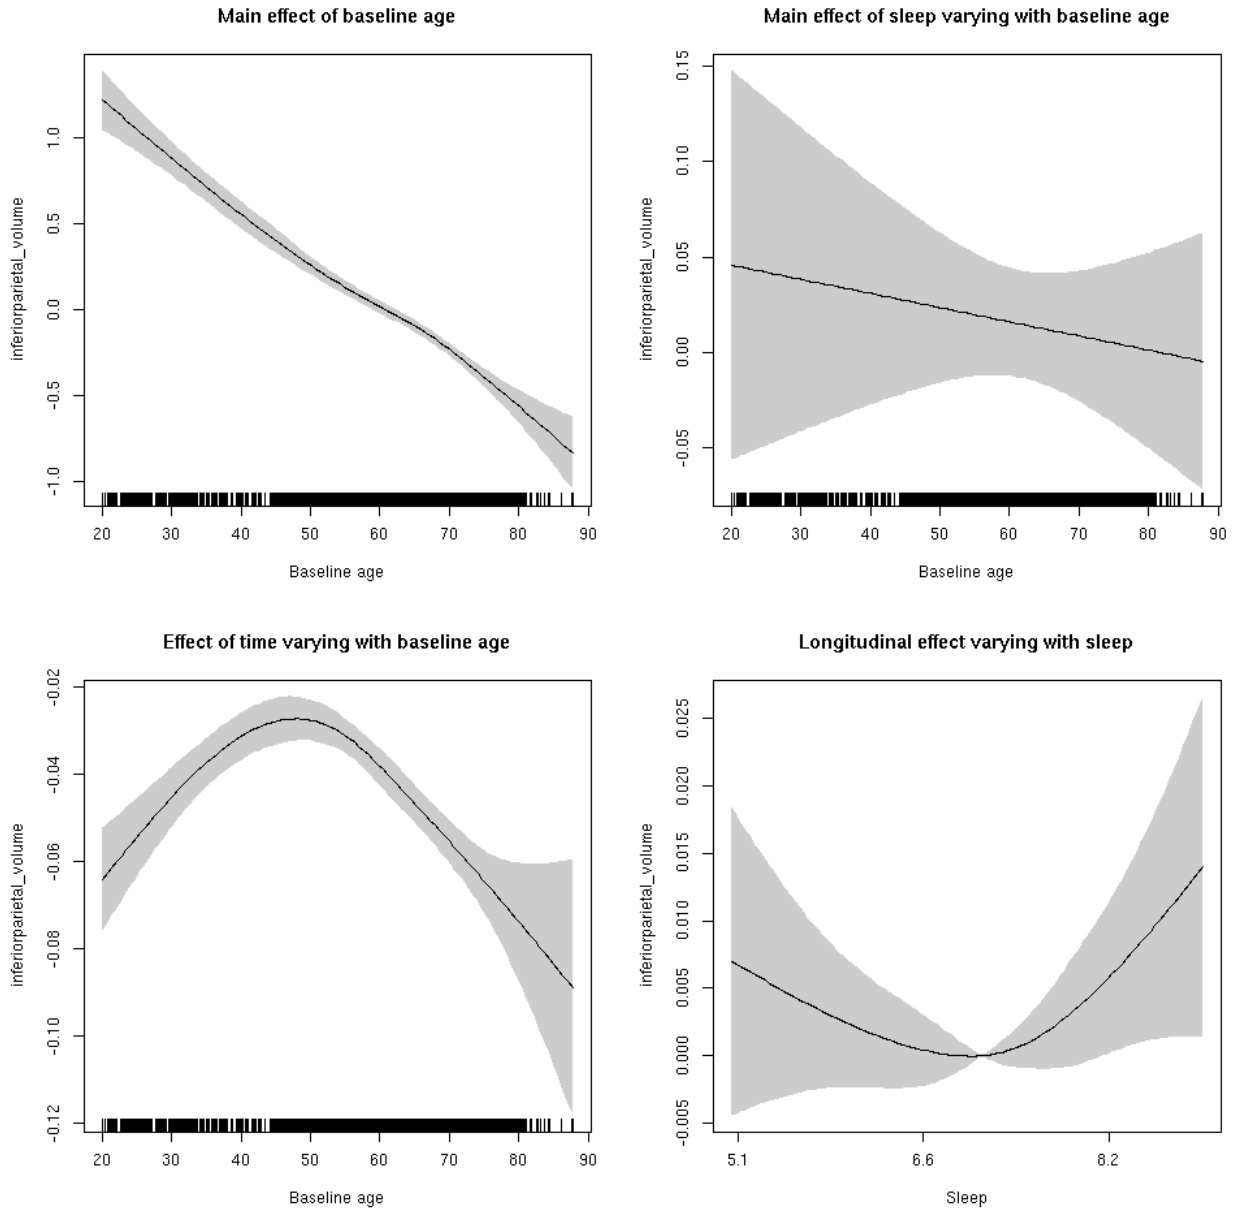

**Restricted to sleep  $\geq 5$  and  $\leq 9$  hours** Below is the row for `s(sleep_z):time` from the model output.

```
## s(sleep_z):time  2.215  2.215  2.454  0.073 .
```

Below are plots of a plot of `s(bl_age)`, `s(bl_age):sleep_z`, `s(bl_age):time`, and `s(sleep_z):time`. For `s(sleep_z):time`, roughly, if we cannot fit a straight line through the confidence bands, there is evidence that the effect of time depends on sleep duration. It is correct that the confidence interval is zero at one point along the axis; this happens because we do not include the main effect.



## inferiortemporal\_area: Stratified by sex

**Female: Full data** Below is the row for `s(sleep_z):time` from the model output.

```
## s(sleep_z):time  1.000  1.000  0.804  0.370
```

Below are plots of a plot of `s(bl_age)`, `s(bl_age):sleep_z`, `s(bl_age):time`, and `s(sleep_z):time`. For `s(sleep_z):time`, roughly, if we cannot fit a straight line through the confidence bands, there is evidence that the effect of time depends on sleep duration. It is correct that the confidence interval is zero at one point along the axis; this happens because we do not include the main effect.

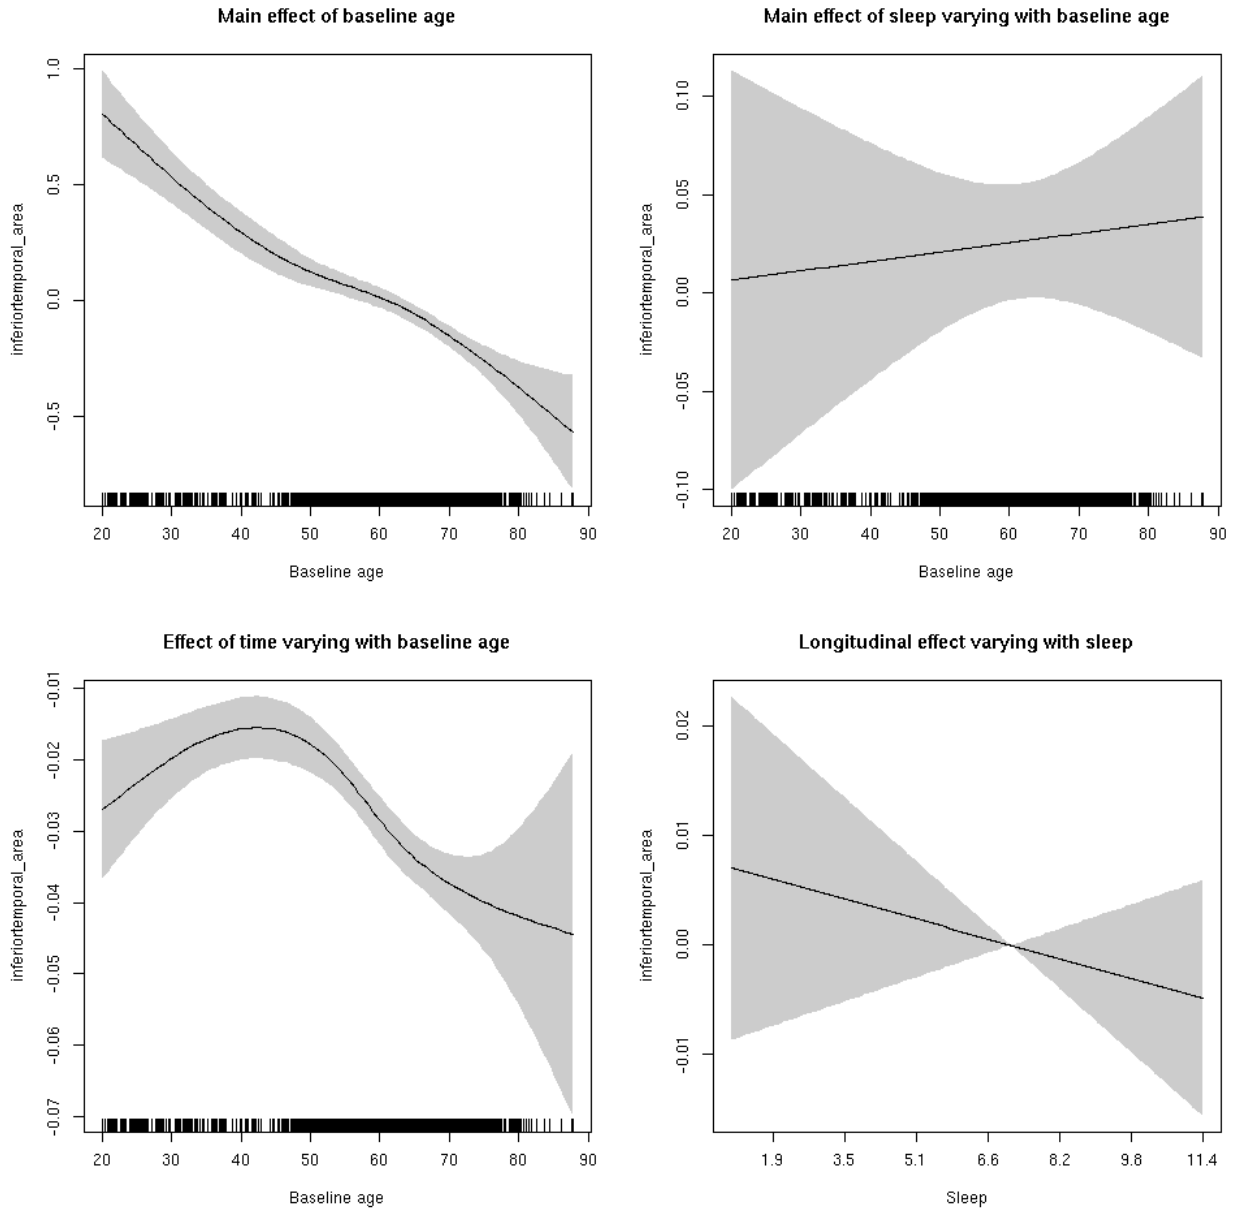

**Male: Full data** Below is the row for `s(sleep_z):time` from the model output.

```
## s(sleep_z):time  1.000  1.000  1.553  0.213
```

Below are plots of a plot of `s(bl_age)`, `s(bl_age):sleep_z`, `s(bl_age):time`, and `s(sleep_z):time`. For `s(sleep_z):time`, roughly, if we cannot fit a straight line through the confidence bands, there is evidence that the effect of time depends on sleep duration. It is correct that the confidence interval is zero at one point along the axis; this happens because we do not include the main effect.

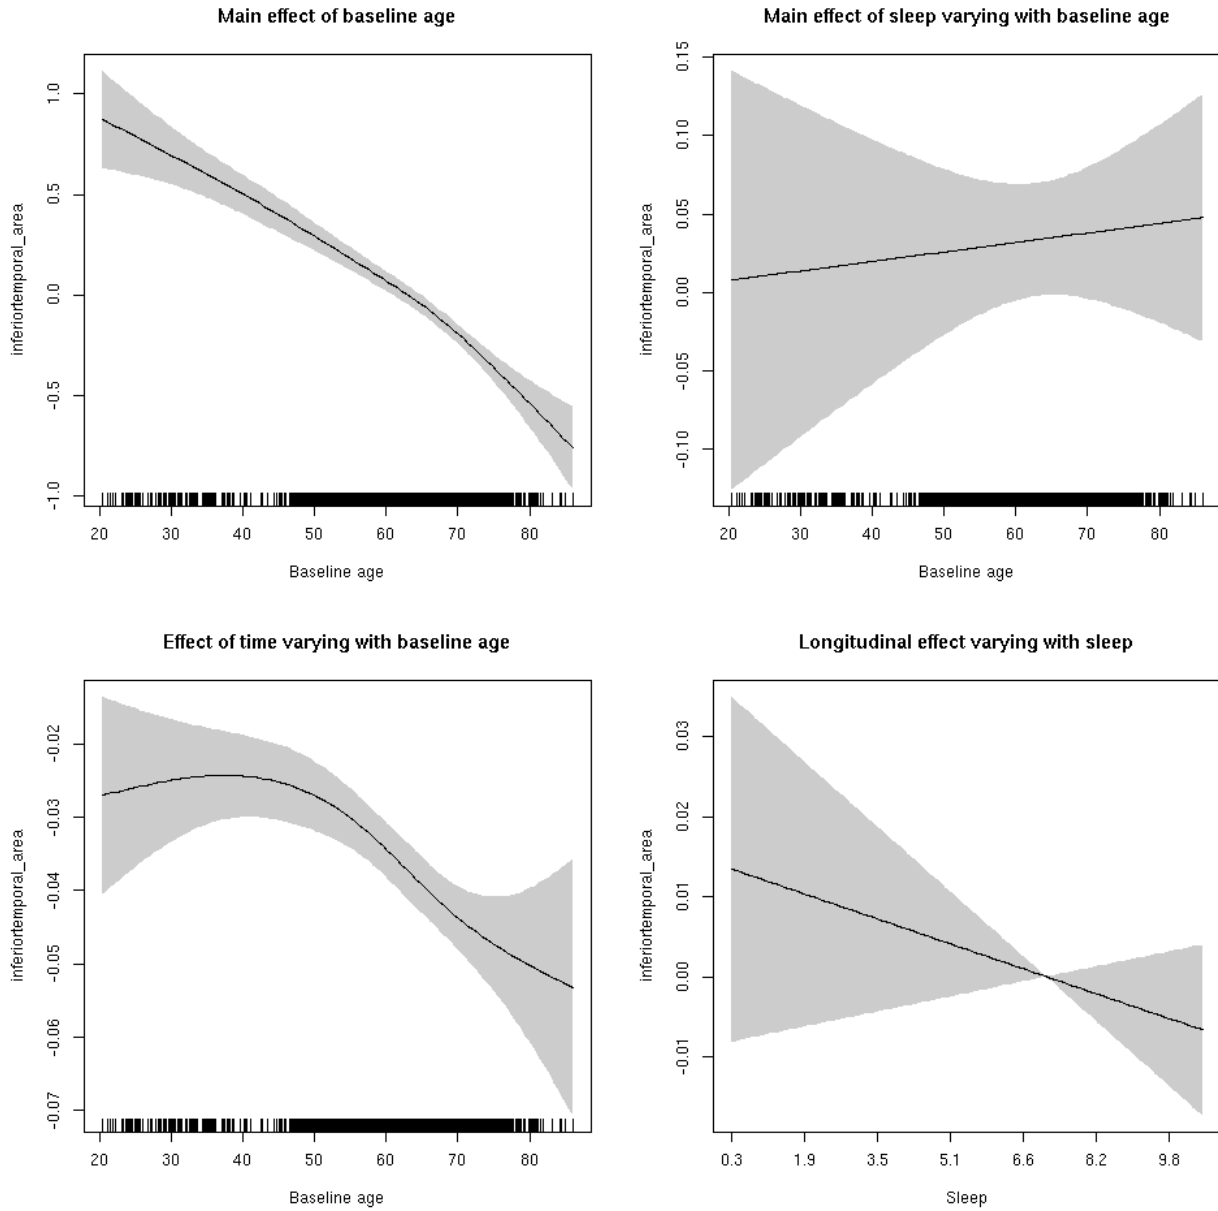

## inferiortemporal\_area

**Full data** Below is the model output. The term `s(sleep_z):time` is probably what we care most about.

```
##
## Family: gaussian
## Link function: identity
##
## Formula:
## value ~ sex + site + icv + s(bl_age, k = 10, bs = "cr") + s(bl_age,
##   by = sleep_z, bs = "cr") + +s(bl_age, by = time, k = 5, bs = "cr") +
##   s(sleep_z, by = time, k = 5, bs = "cr", pc = 0)
## <environment: 0x5630035b23a8>
```

```

##
## Parametric coefficients:
##           Estimate Std. Error t value Pr(>|t|)
## (Intercept)  0.73448    0.05236  14.027 < 2e-16 ***
## sexmale      0.31021    0.02689  11.535 < 2e-16 ***
## siteousAvanto -0.57154    0.06379  -8.960 < 2e-16 ***
## siteousPrisma -1.43967    0.11290 -12.752 < 2e-16 ***
## siteousSkyra  -0.17051    0.06182  -2.758  0.00582 **
## siteUB        -0.72259    0.12133  -5.955  2.7e-09 ***
## siteUCAM      -0.76953    0.06530 -11.785 < 2e-16 ***
## siteUKB       -0.85943    0.04987 -17.234 < 2e-16 ***
## siteUmU       -0.30512    0.07501  -4.068  4.8e-05 ***
## icv           0.54695    0.01306  41.868 < 2e-16 ***
## ---
## Signif. codes:  0 '***' 0.001 '**' 0.01 '*' 0.05 '.' 0.1 ' ' 1
##
## Approximate significance of smooth terms:
##           edf Ref.df      F p-value
## s(bl_age)      3.460  3.460 113.707 <2e-16 ***
## s(bl_age):sleep_z 2.000  2.000   2.529  0.0798 .
## s(bl_age):time  4.063  4.063 287.520 <2e-16 ***
## s(sleep_z):time  1.000  1.000   2.099  0.1474
## ---
## Signif. codes:  0 '***' 0.001 '**' 0.01 '*' 0.05 '.' 0.1 ' ' 1
##
## R-sq.(adj) =  0.535
## lmer.REML = 4963.7  Scale est. = 0.014116  n = 8154

```

Below are plots of a plot of `s(bl_age)`, `s(bl_age):sleep_z`, `s(bl_age):time`, and `s(sleep_z):time`. For `s(sleep_z):time`, roughly, if we cannot fit a straight line through the confidence bands, there is evidence that the effect of time depends on sleep duration. It is correct that the confidence interval is zero at one point along the axis; this happens because we do not include the main effect.



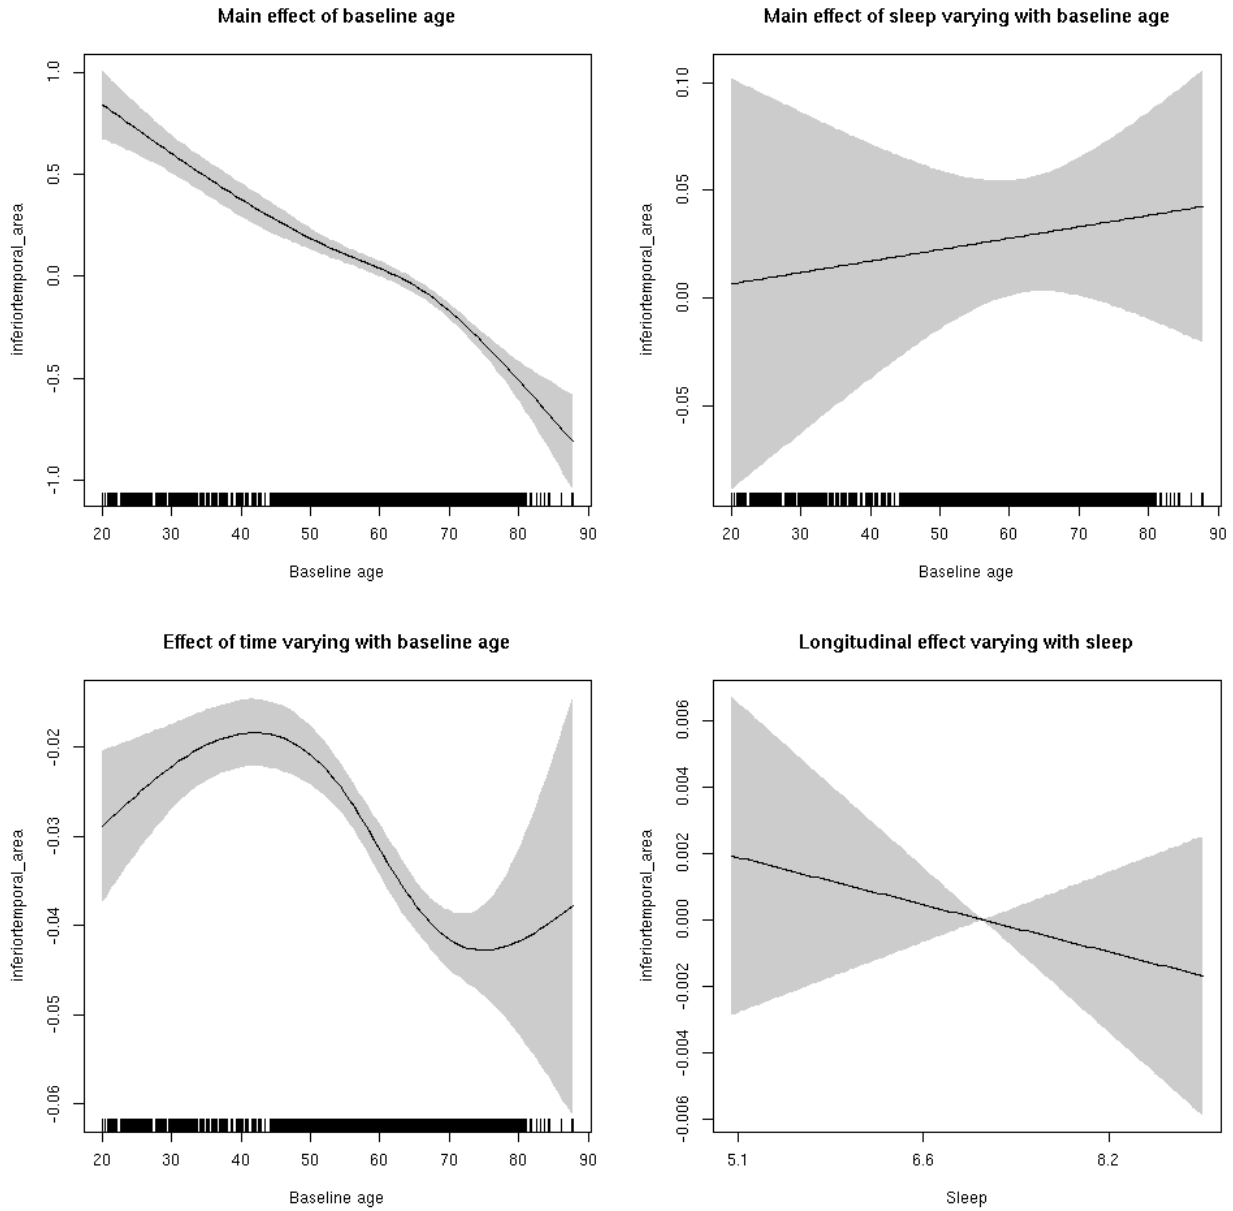

**Restricted to sleep  $\geq 5$  and  $\leq 9$  hours** Below is the row for `s(sleep_z):time` from the model output.

```
## s(sleep_z):time  1.000  1.000  0.646  0.4215
```

Below are plots of a plot of `s(bl_age)`, `s(bl_age):sleep_z`, `s(bl_age):time`, and `s(sleep_z):time`. For `s(sleep_z):time`, roughly, if we cannot fit a straight line through the confidence bands, there is evidence that the effect of time depends on sleep duration. It is correct that the confidence interval is zero at one point along the axis; this happens because we do not include the main effect.

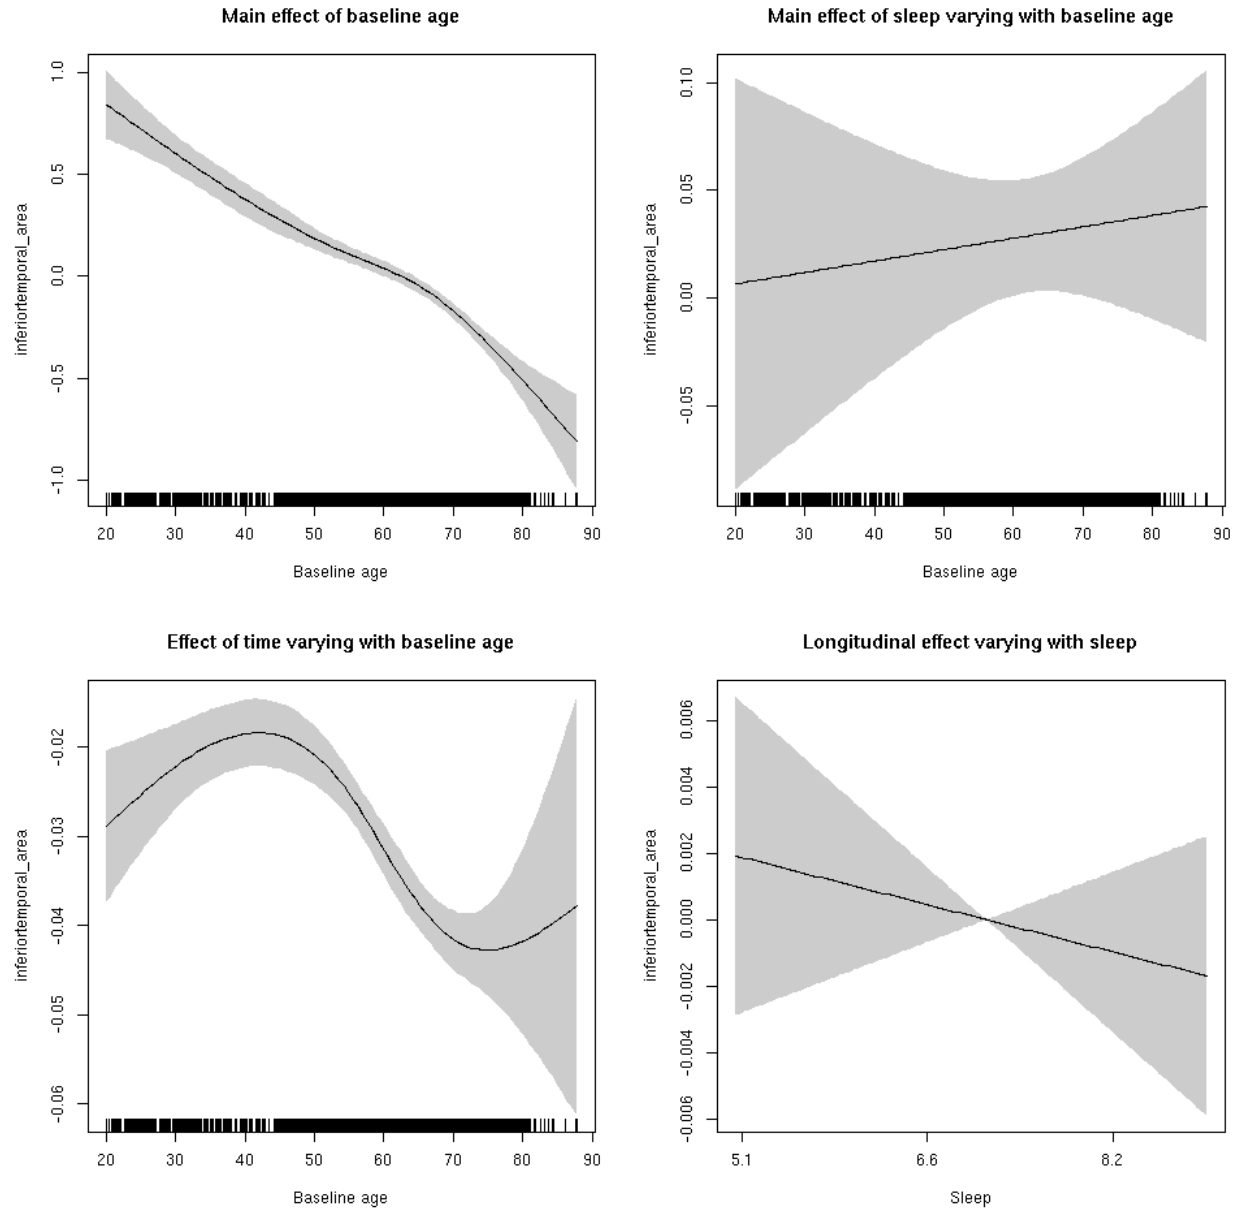

### inferiortemporal\_thickness: Stratified by sex

**Female: Full data** Below is the row for `s(sleep_z):time` from the model output.

```
## s(sleep_z):time  1.000  1.000  2.811  0.0937 .
```

Below are plots of a plot of `s(bl_age)`, `s(bl_age):sleep_z`, `s(bl_age):time`, and `s(sleep_z):time`. For `s(sleep_z):time`, roughly, if we cannot fit a straight line through the confidence bands, there is evidence that the effect of time depends on sleep duration. It is correct that the confidence interval is zero at one point along the axis; this happens because we do not include the main effect.

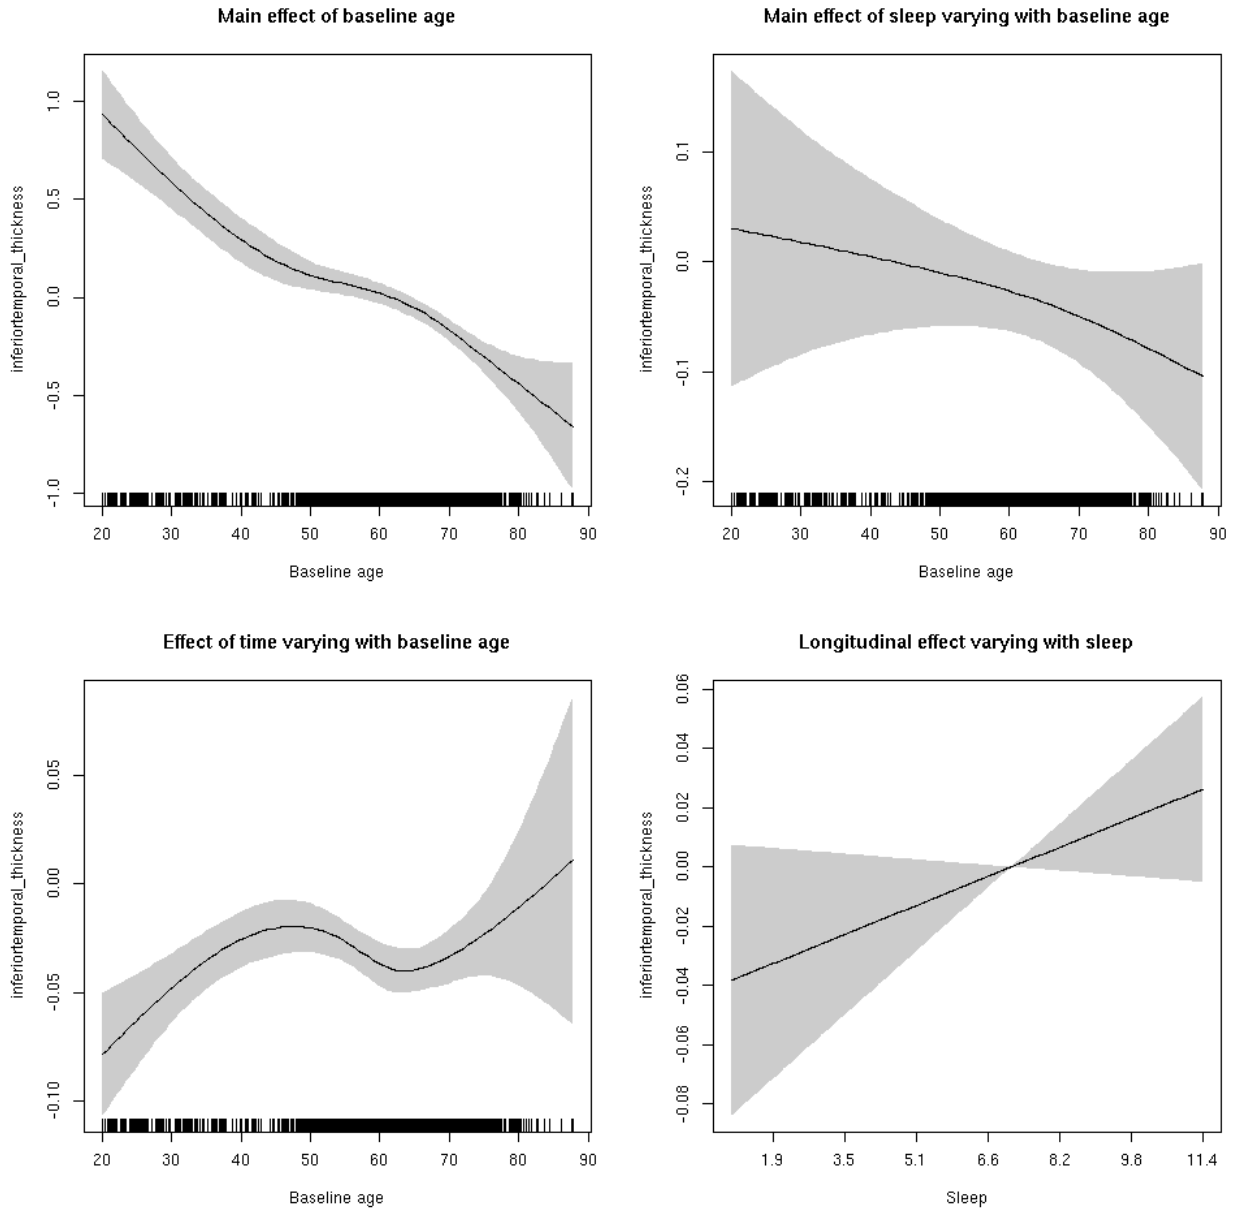

**Male: Full data** Below is the row for `s(sleep_z):time` from the model output.

```
## s(sleep_z):time  3.075  3.075  3.172  0.0422 *
```

Below are plots of a plot of `s(bl_age)`, `s(bl_age):sleep_z`, `s(bl_age):time`, and `s(sleep_z):time`. For `s(sleep_z):time`, roughly, if we cannot fit a straight line through the confidence bands, there is evidence that the effect of time depends on sleep duration. It is correct that the confidence interval is zero at one point along the axis; this happens because we do not include the main effect.

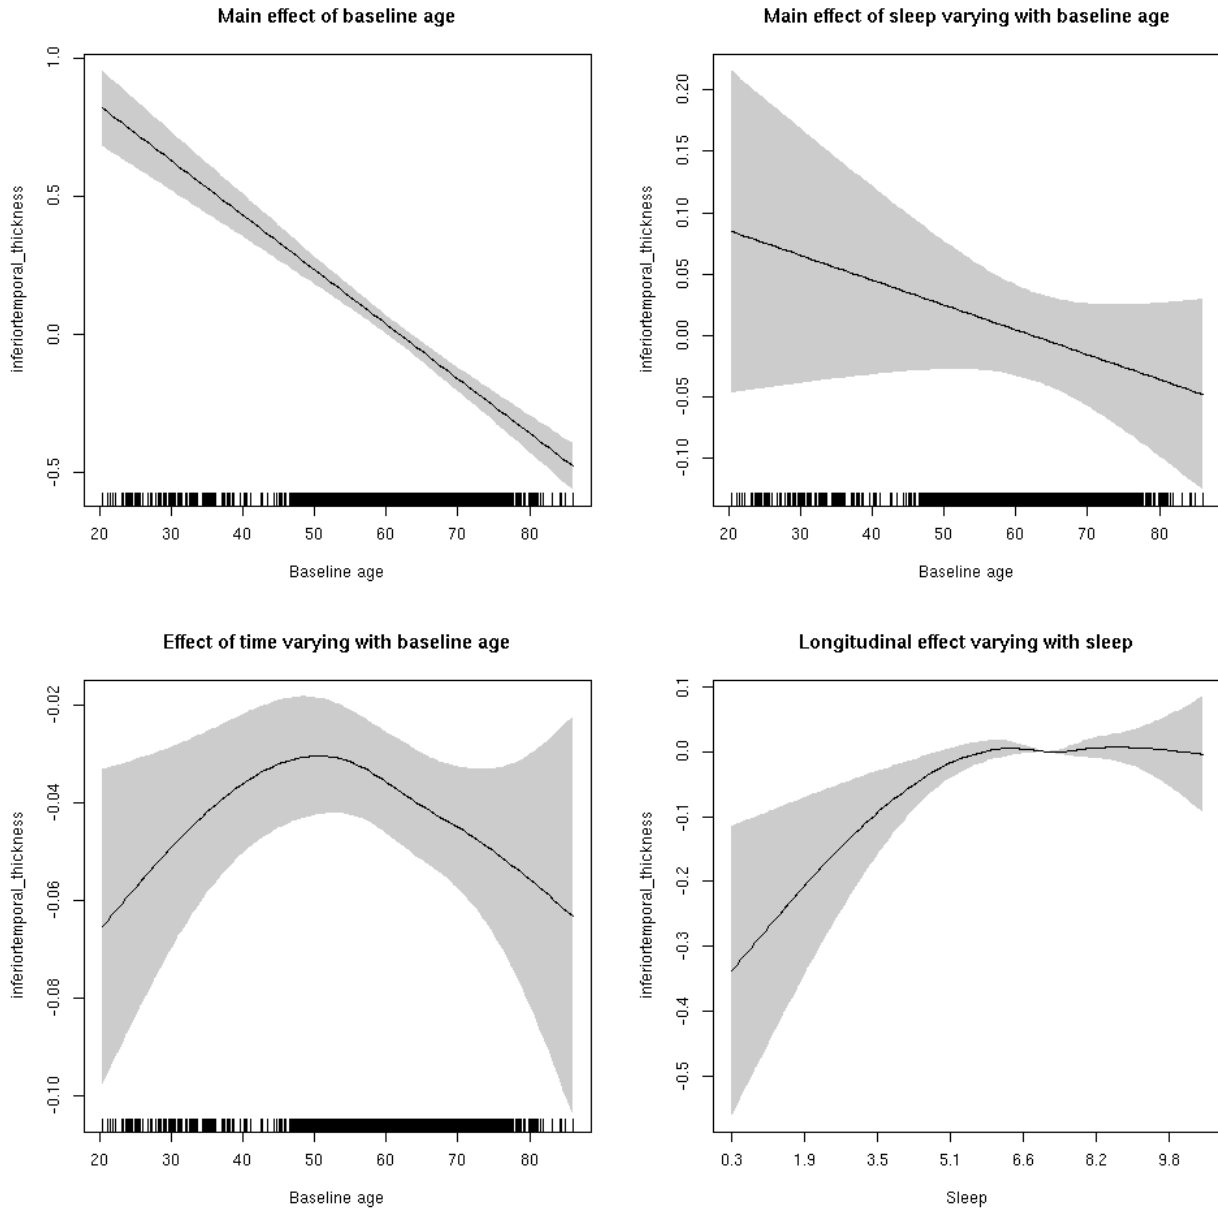

## inferiortemporal\_thickness

**Full data** Below is the model output. The term `s(sleep_z):time` is probably what we care most about.

```
##
## Family: gaussian
## Link function: identity
##
## Formula:
## value ~ sex + site + s(bl_age, k = 10, bs = "cr") + s(bl_age,
##   by = sleep_z, bs = "cr") + +s(bl_age, by = time, k = 5, bs = "cr") +
##   s(sleep_z, by = time, k = 5, bs = "cr", pc = 0)
## <environment: 0x5630035d4498>
```

```

##
## Parametric coefficients:
##           Estimate Std. Error t value Pr(>|t|)
## (Intercept) -2.43490    0.04697 -51.835 < 2e-16 ***
## sexmale      0.14719    0.02358   6.241 4.56e-10 ***
## siteousAvanto 0.72305    0.06218  11.628 < 2e-16 ***
## siteousPrisma 1.26211    0.24513   5.149 2.68e-07 ***
## siteousSkyra  0.70438    0.06216  11.331 < 2e-16 ***
## siteUB       0.77904    0.12514   6.225 5.05e-10 ***
## siteUCAM     0.93968    0.06466  14.532 < 2e-16 ***
## siteUKB      2.66345    0.04759  55.967 < 2e-16 ***
## siteUmU      0.36558    0.07750   4.717 2.43e-06 ***
## ---
## Signif. codes:  0 '***' 0.001 '**' 0.01 '*' 0.05 '.' 0.1 ' ' 1
##
## Approximate significance of smooth terms:
##           edf Ref.df    F p-value
## s(bl_age)      3.326  3.326 91.807 <2e-16 ***
## s(bl_age):sleep_z 2.000  2.000  3.120  0.0442 *
## s(bl_age):time  4.162  4.162 38.811 <2e-16 ***
## s(sleep_z):time  3.246  3.246  3.073  0.0141 *
## ---
## Signif. codes:  0 '***' 0.001 '**' 0.01 '*' 0.05 '.' 0.1 ' ' 1
##
## R-sq.(adj) =  0.624
## lmer.REML = 13760  Scale est. = 0.10066  n = 8172

```

Below are plots of a plot of `s(bl_age)`, `s(bl_age):sleep_z`, `s(bl_age):time`, and `s(sleep_z):time`. For `s(sleep_z):time`, roughly, if we cannot fit a straight line through the confidence bands, there is evidence that the effect of time depends on sleep duration. It is correct that the confidence interval is zero at one point along the axis; this happens because we do not include the main effect.

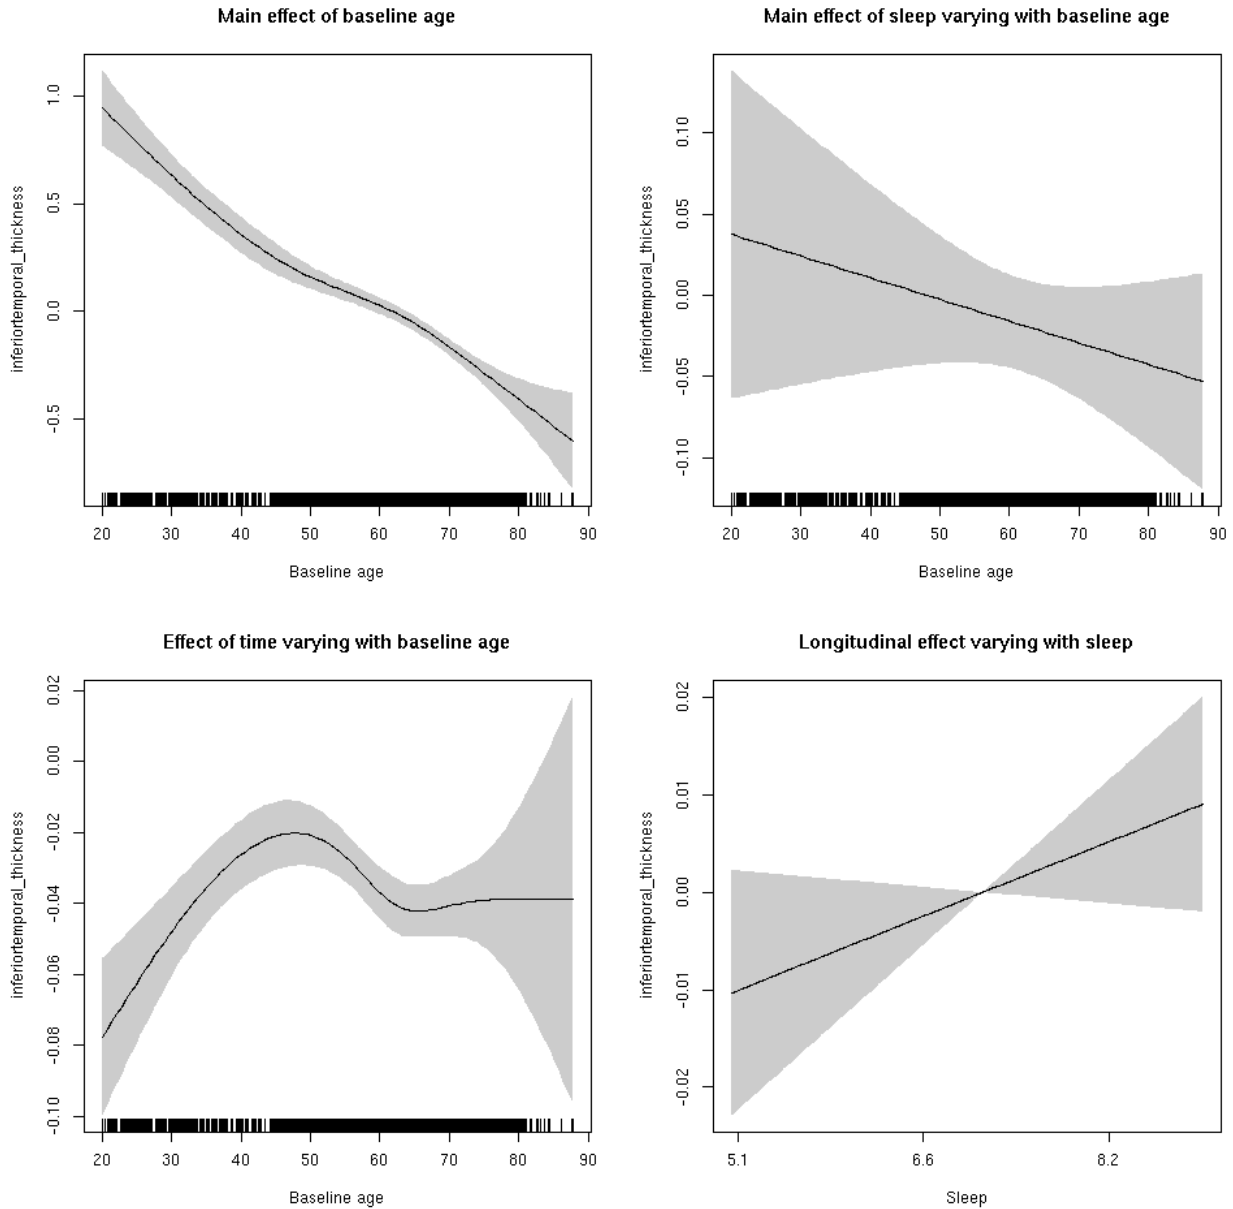

**Restricted to sleep  $\geq 5$  and  $\leq 9$  hours** Below is the row for `s(sleep_z):time` from the model output.

```
## s(sleep_z):time 1.000 1.000 2.683 0.101
```

Below are plots of a plot of `s(bl_age)`, `s(bl_age):sleep_z`, `s(bl_age):time`, and `s(sleep_z):time`. For `s(sleep_z):time`, roughly, if we cannot fit a straight line through the confidence bands, there is evidence that the effect of time depends on sleep duration. It is correct that the confidence interval is zero at one point along the axis; this happens because we do not include the main effect.



### inferiortemporal\_volume: Stratified by sex

**Female: Full data** Below is the row for `s(sleep_z):time` from the model output.

```
## s(sleep_z):time  1.000  1.000  0.041  0.840
```

Below are plots of a plot of `s(bl_age)`, `s(bl_age):sleep_z`, `s(bl_age):time`, and `s(sleep_z):time`. For `s(sleep_z):time`, roughly, if we cannot fit a straight line through the confidence bands, there is evidence that the effect of time depends on sleep duration. It is correct that the confidence interval is zero at one point along the axis; this happens because we do not include the main effect.

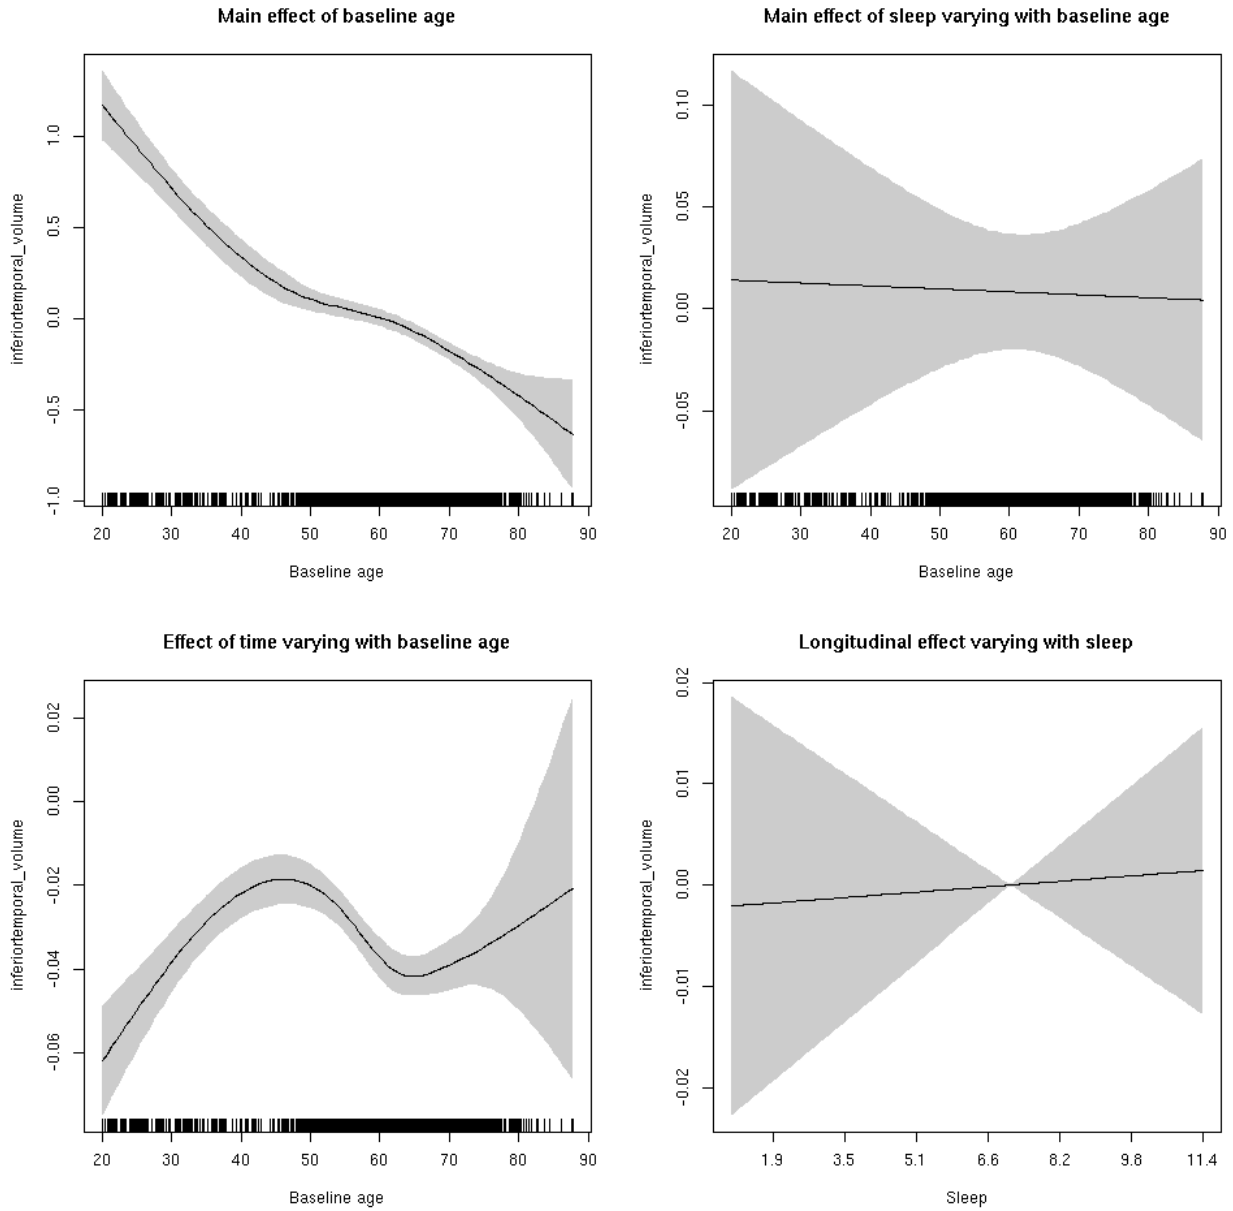

**Male: Full data** Below is the row for `s(sleep_z):time` from the model output.

```
## s(sleep_z):time  1.000  1.000  0.429  0.513
```

Below are plots of a plot of `s(bl_age)`, `s(bl_age):sleep_z`, `s(bl_age):time`, and `s(sleep_z):time`. For `s(sleep_z):time`, roughly, if we cannot fit a straight line through the confidence bands, there is evidence that the effect of time depends on sleep duration. It is correct that the confidence interval is zero at one point along the axis; this happens because we do not include the main effect.



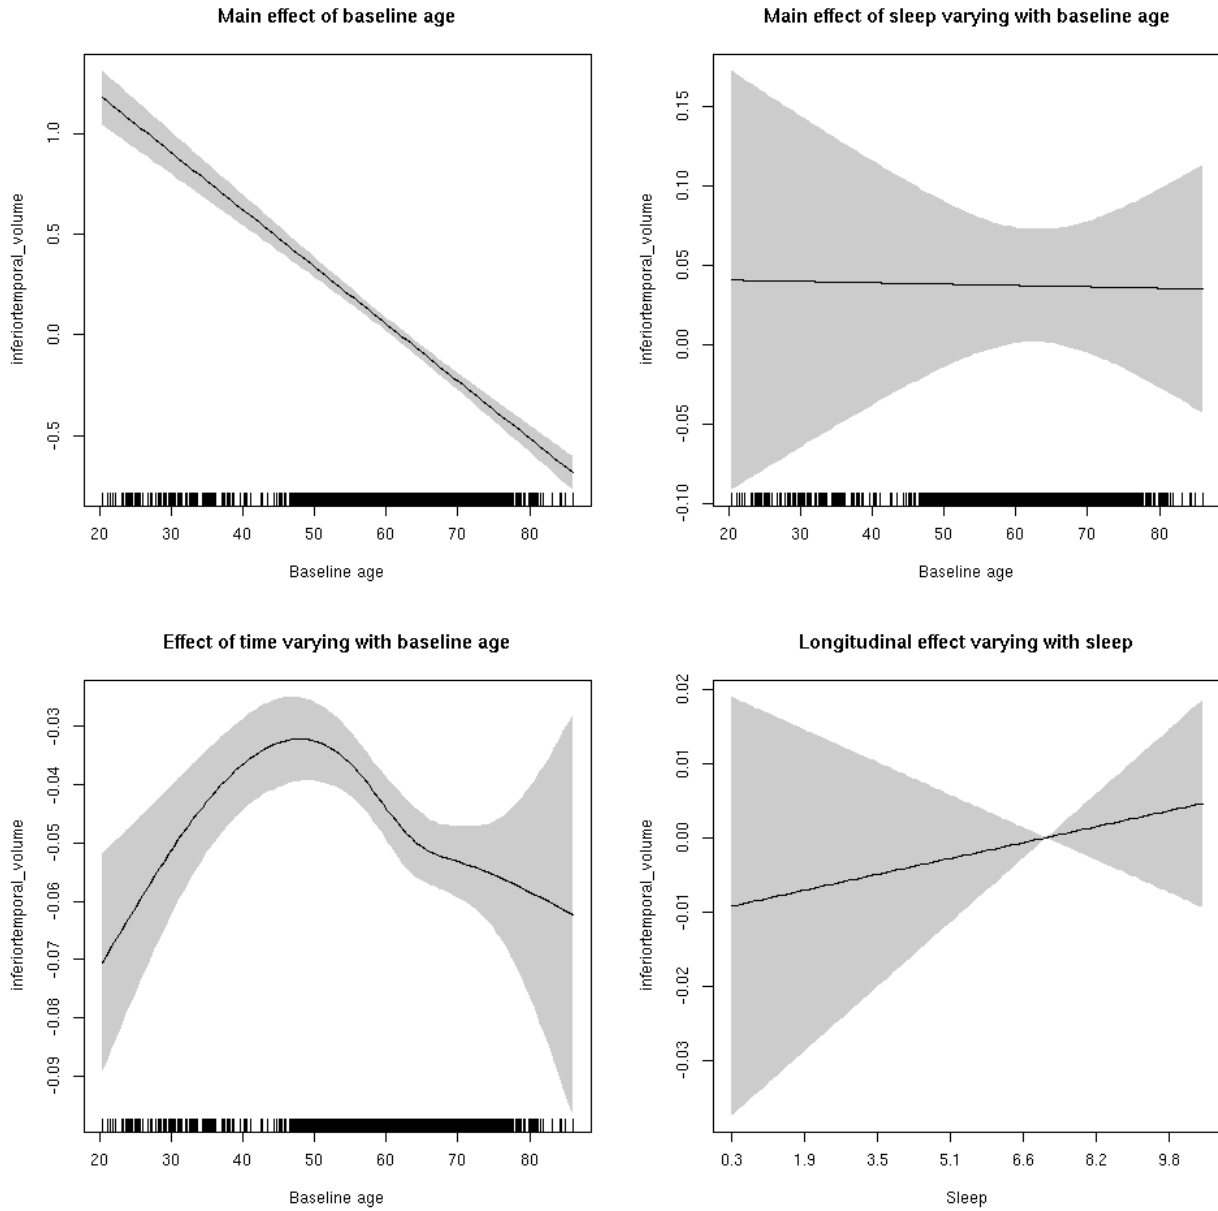

## inferiortemporal\_volume

**Full data** Below is the model output. The term `s(sleep_z):time` is probably what we care most about.

```
##
## Family: gaussian
## Link function: identity
##
## Formula:
## value ~ sex + site + icv + s(bl_age, k = 10, bs = "cr") + s(bl_age,
##   by = sleep_z, bs = "cr") + +s(bl_age, by = time, k = 5, bs = "cr") +
##   s(sleep_z, by = time, k = 5, bs = "cr", pc = 0)
## <environment: 0x5630035b2648>
```

```

##
## Parametric coefficients:
##           Estimate Std. Error t value Pr(>|t|)
## (Intercept) -0.43134    0.05167  -8.347 < 2e-16 ***
## sexmale      0.30233    0.02652  11.399 < 2e-16 ***
## siteousAvanto -0.18416    0.06298  -2.924 0.003464 **
## siteousPrisma -0.56915    0.13632  -4.175 3.01e-05 ***
## siteousSkyra  0.19362    0.06099   3.174 0.001507 **
## siteUB       -0.17370    0.11906  -1.459 0.144625
## siteUCAM     -0.22099    0.06426  -3.439 0.000587 ***
## siteUKB      0.45927    0.04915   9.343 < 2e-16 ***
## siteUmU      0.15251    0.07375   2.068 0.038688 *
## icv          0.52774    0.01302  40.522 < 2e-16 ***
## ---
## Signif. codes:  0 '***' 0.001 '**' 0.01 '*' 0.05 '.' 0.1 ' ' 1
##
## Approximate significance of smooth terms:
##           edf Ref.df      F p-value
## s(bl_age)      3.651  3.651 160.570 <2e-16 ***
## s(bl_age):sleep_z 2.000  2.000   1.191   0.304
## s(bl_age):time  4.486  4.486 241.131 <2e-16 ***
## s(sleep_z):time  1.000  1.000   0.457   0.499
## ---
## Signif. codes:  0 '***' 0.001 '**' 0.01 '*' 0.05 '.' 0.1 ' ' 1
##
## R-sq.(adj) =  0.555
## lmer.REML = 7162.2  Scale est. = 0.024358  n = 8164

```

Below are plots of a plot of  $s(\text{bl\_age})$ ,  $s(\text{bl\_age}):\text{sleep\_z}$ ,  $s(\text{bl\_age}):\text{time}$ , and  $s(\text{sleep\_z}):\text{time}$ . For  $s(\text{sleep\_z}):\text{time}$ , roughly, if we cannot fit a straight line through the confidence bands, there is evidence that the effect of time depends on sleep duration. It is correct that the confidence interval is zero at one point along the axis; this happens because we do not include the main effect.

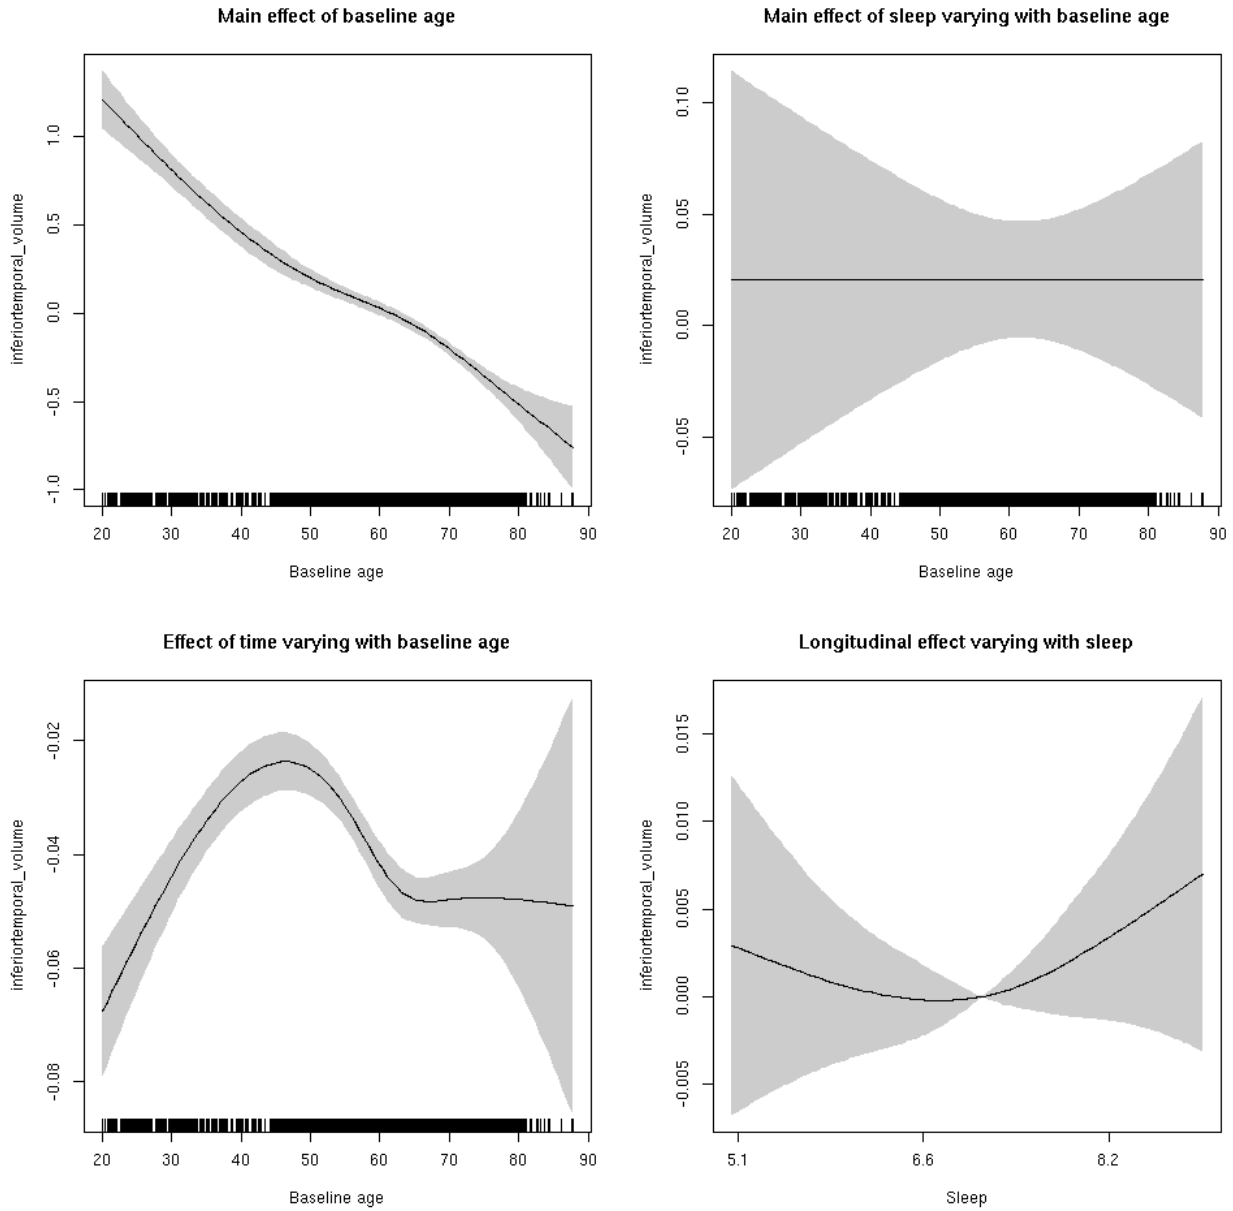

**Restricted to sleep  $\geq 5$  and  $\leq 9$  hours** Below is the row for `s(sleep_z):time` from the model output.

```
## s(sleep_z):time  1.739  1.739  0.876  0.354
```

Below are plots of a plot of `s(bl_age)`, `s(bl_age):sleep_z`, `s(bl_age):time`, and `s(sleep_z):time`. For `s(sleep_z):time`, roughly, if we cannot fit a straight line through the confidence bands, there is evidence that the effect of time depends on sleep duration. It is correct that the confidence interval is zero at one point along the axis; this happens because we do not include the main effect.

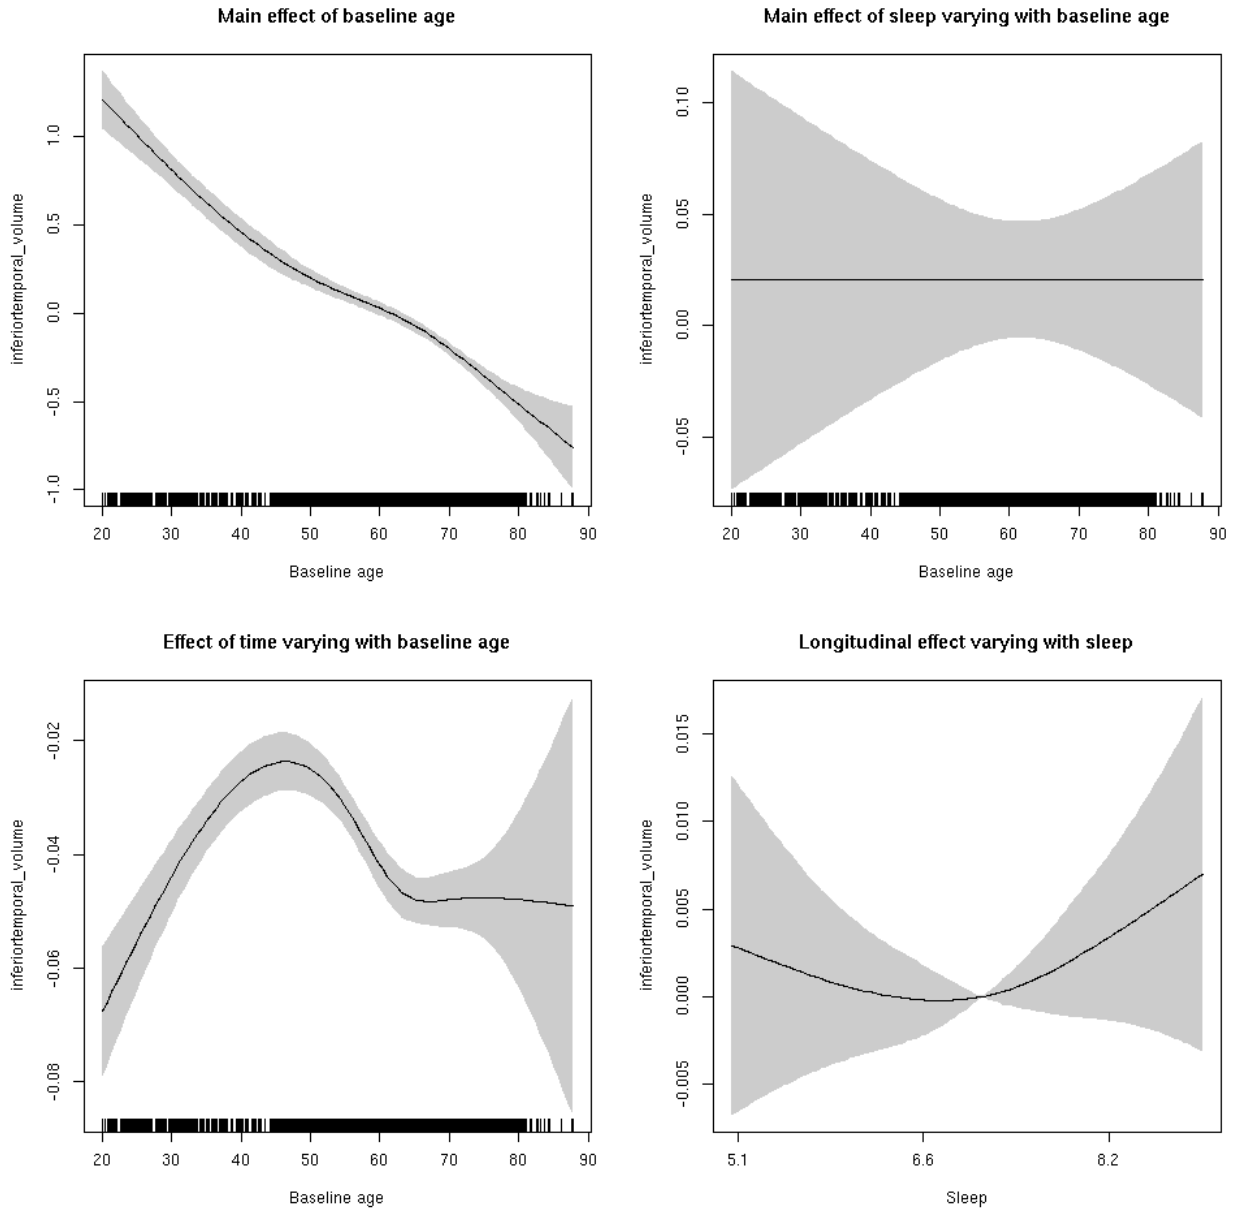

## insula\_area: Stratified by sex

**Female: Full data** Below is the row for `s(sleep_z):time` from the model output.

```
## s(sleep_z):time  1.000  1.000 0.013  0.910
```

Below are plots of a plot of `s(bl_age)`, `s(bl_age):sleep_z`, `s(bl_age):time`, and `s(sleep_z):time`. For `s(sleep_z):time`, roughly, if we cannot fit a straight line through the confidence bands, there is evidence that the effect of time depends on sleep duration. It is correct that the confidence interval is zero at one point along the axis; this happens because we do not include the main effect.

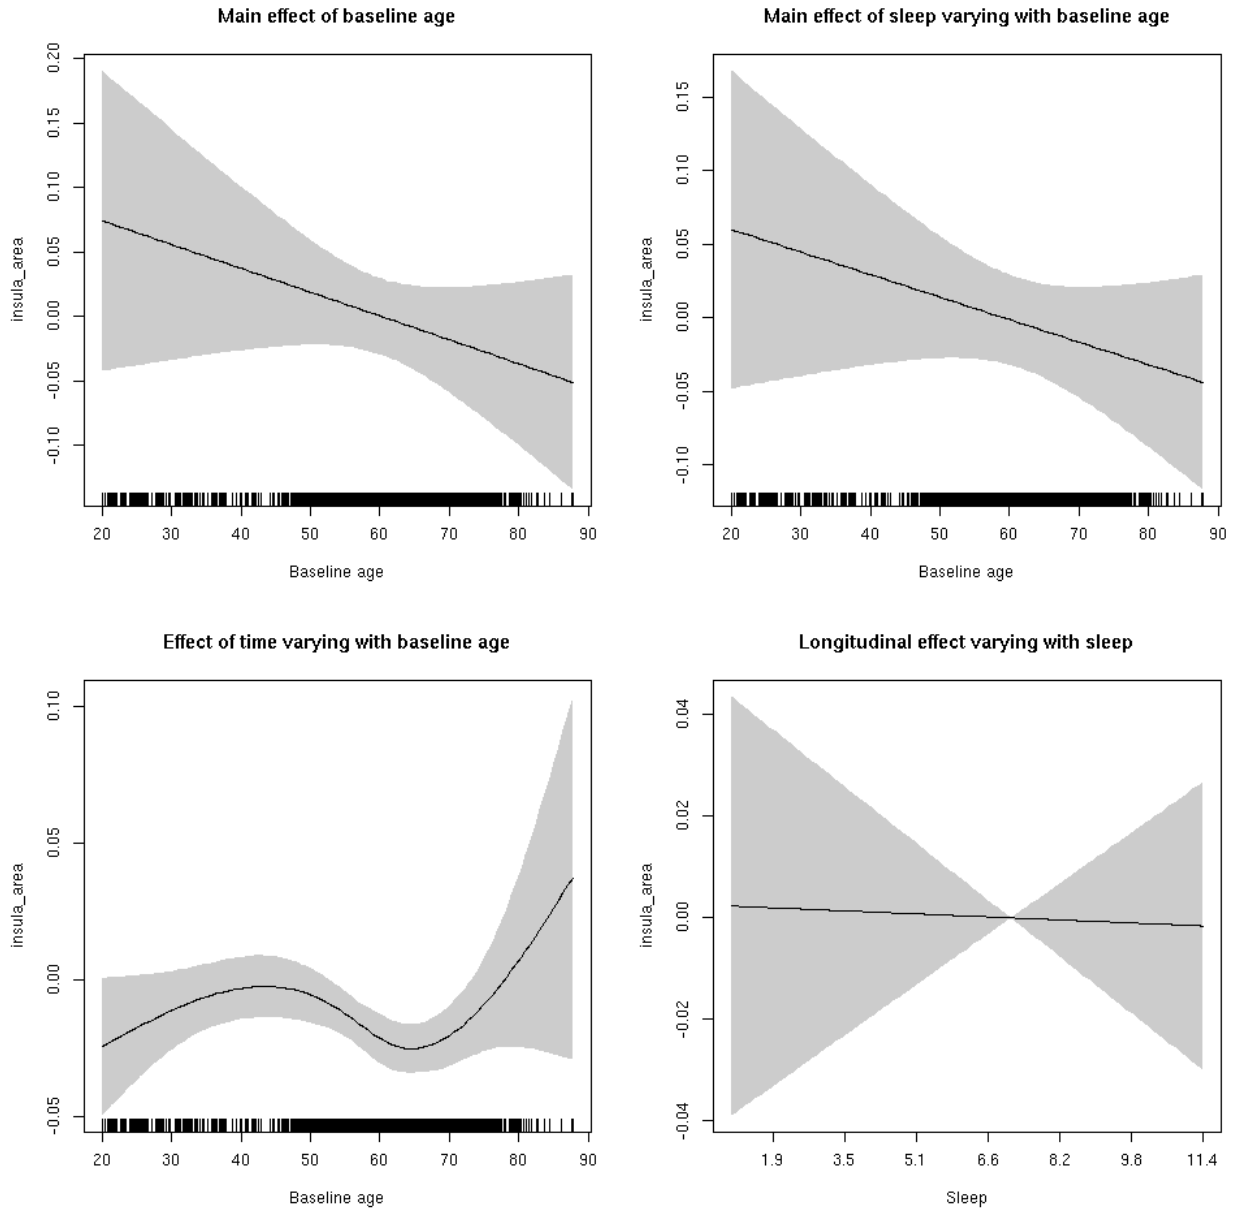

**Male: Full data** Below is the row for `s(sleep_z):time` from the model output.

```
## s(sleep_z):time      1      1  2.026  0.1547
```

Below are plots of a plot of `s(bl_age)`, `s(bl_age):sleep_z`, `s(bl_age):time`, and `s(sleep_z):time`. For `s(sleep_z):time`, roughly, if we cannot fit a straight line through the confidence bands, there is evidence that the effect of time depends on sleep duration. It is correct that the confidence interval is zero at one point along the axis; this happens because we do not include the main effect.

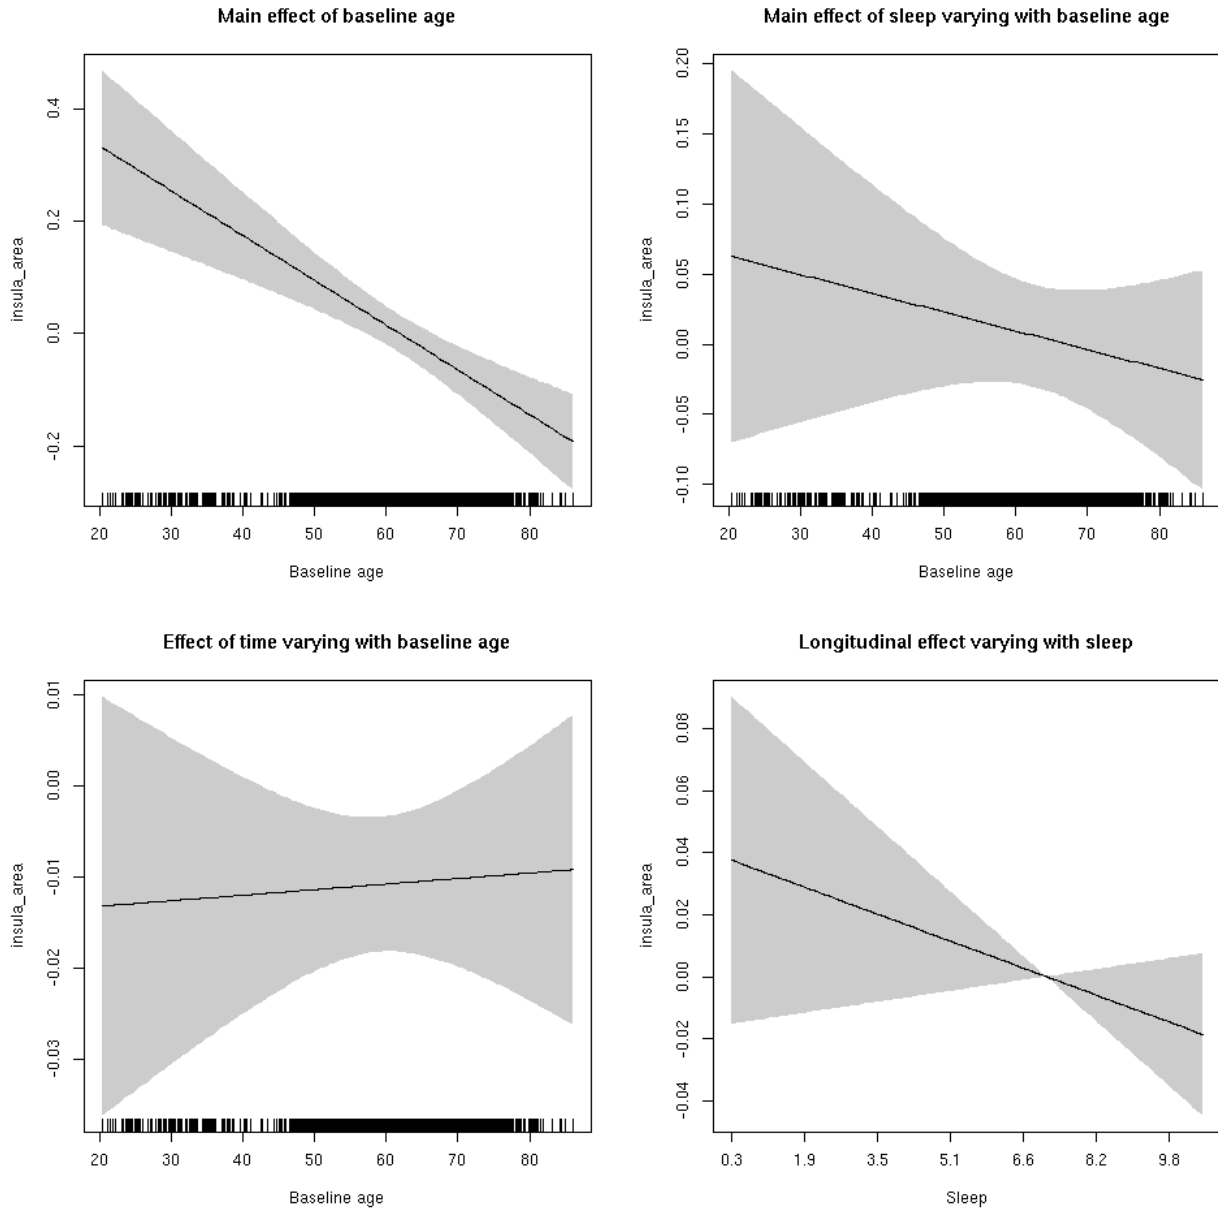

## insula\_area

**Full data** Below is the model output. The term `s(sleep_z):time` is probably what we care most about.

```
##
## Family: gaussian
## Link function: identity
##
## Formula:
## value ~ sex + site + icv + s(bl_age, k = 10, bs = "cr") + s(bl_age,
##   by = sleep_z, bs = "cr") + +s(bl_age, by = time, k = 5, bs = "cr") +
##   s(sleep_z, by = time, k = 5, bs = "cr", pc = 0)
## <environment: 0x5630035b39d0>
```

```

##
## Parametric coefficients:
##           Estimate Std. Error t value Pr(>|t|)
## (Intercept)  0.56673    0.05234  10.827 < 2e-16 ***
## sexmale      0.28178    0.02715  10.377 < 2e-16 ***
## siteousAvanto -0.66267    0.06541 -10.131 < 2e-16 ***
## siteousPrisma -1.08530    0.23918  -4.538 5.77e-06 ***
## siteousSkyra  -0.57480    0.06319  -9.096 < 2e-16 ***
## siteUB       -0.83764    0.12023  -6.967 3.49e-12 ***
## siteUCAM     -0.76579    0.06501 -11.779 < 2e-16 ***
## siteUKB      -0.69504    0.04868 -14.276 < 2e-16 ***
## siteUmU      -0.37871    0.07494  -5.053 4.44e-07 ***
## icv          0.61672    0.01345  45.847 < 2e-16 ***
## ---
## Signif. codes:  0 '***' 0.001 '**' 0.01 '*' 0.05 '.' 0.1 ' ' 1
##
## Approximate significance of smooth terms:
##           edf Ref.df      F  p-value
## s(bl_age)      1      1 20.632 5.80e-06 ***
## s(bl_age):sleep_z  2      2  1.250  0.287
## s(bl_age):time    2      2 15.845 2.27e-07 ***
## s(sleep_z):time   1      1  1.174  0.279
## ---
## Signif. codes:  0 '***' 0.001 '**' 0.01 '*' 0.05 '.' 0.1 ' ' 1
##
## R-sq.(adj) =  0.488
## lmer.REML = 13109 Scale est. = 0.094419 n = 8178

```

Below are plots of a plot of  $s(\text{bl\_age})$ ,  $s(\text{bl\_age}):\text{sleep\_z}$ ,  $s(\text{bl\_age}):\text{time}$ , and  $s(\text{sleep\_z}):\text{time}$ . For  $s(\text{sleep\_z}):\text{time}$ , roughly, if we cannot fit a straight line through the confidence bands, there is evidence that the effect of time depends on sleep duration. It is correct that the confidence interval is zero at one point along the axis; this happens because we do not include the main effect.

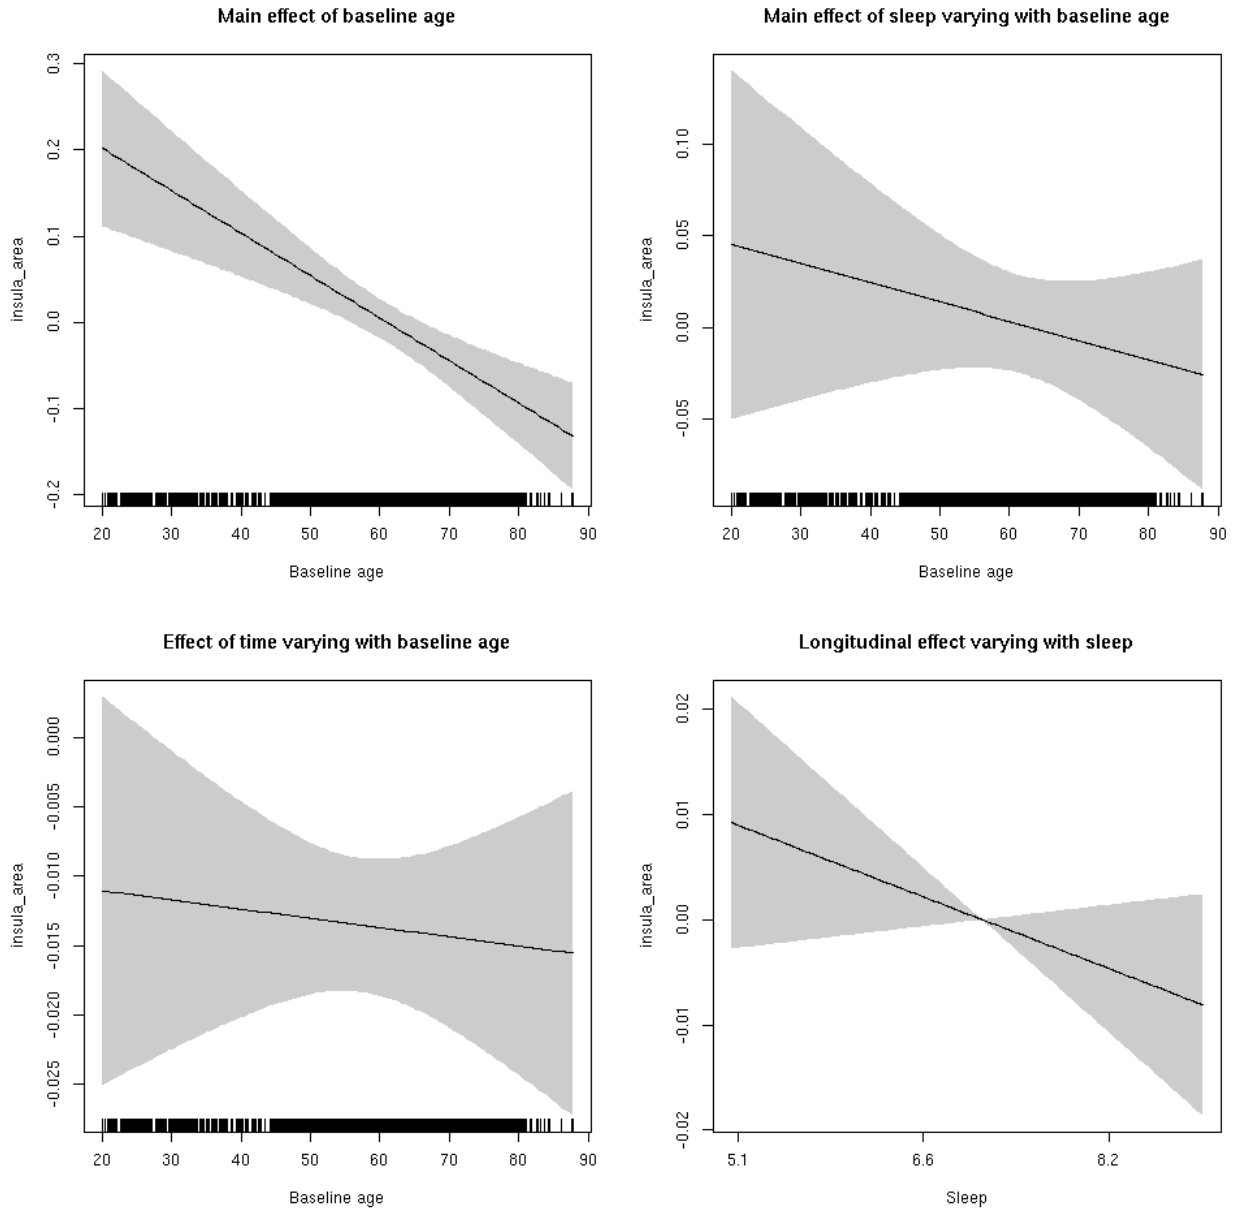

**Restricted to sleep  $\geq 5$  and  $\leq 9$  hours** Below is the row for `s(sleep_z):time` from the model output.

```
## s(sleep_z):time      1      1  2.362   0.124
```

Below are plots of a plot of `s(bl_age)`, `s(bl_age):sleep_z`, `s(bl_age):time`, and `s(sleep_z):time`. For `s(sleep_z):time`, roughly, if we cannot fit a straight line through the confidence bands, there is evidence that the effect of time depends on sleep duration. It is correct that the confidence interval is zero at one point along the axis; this happens because we do not include the main effect.





## insula\_thickness: Stratified by sex

**Female: Full data** Below is the row for `s(sleep_z):time` from the model output.

```
## s(sleep_z):time  1.948  1.948  1.638  0.210483
```

Below are plots of a plot of `s(bl_age)`, `s(bl_age):sleep_z`, `s(bl_age):time`, and `s(sleep_z):time`. For `s(sleep_z):time`, roughly, if we cannot fit a straight line through the confidence bands, there is evidence that the effect of time depends on sleep duration. It is correct that the confidence interval is zero at one point along the axis; this happens because we do not include the main effect.

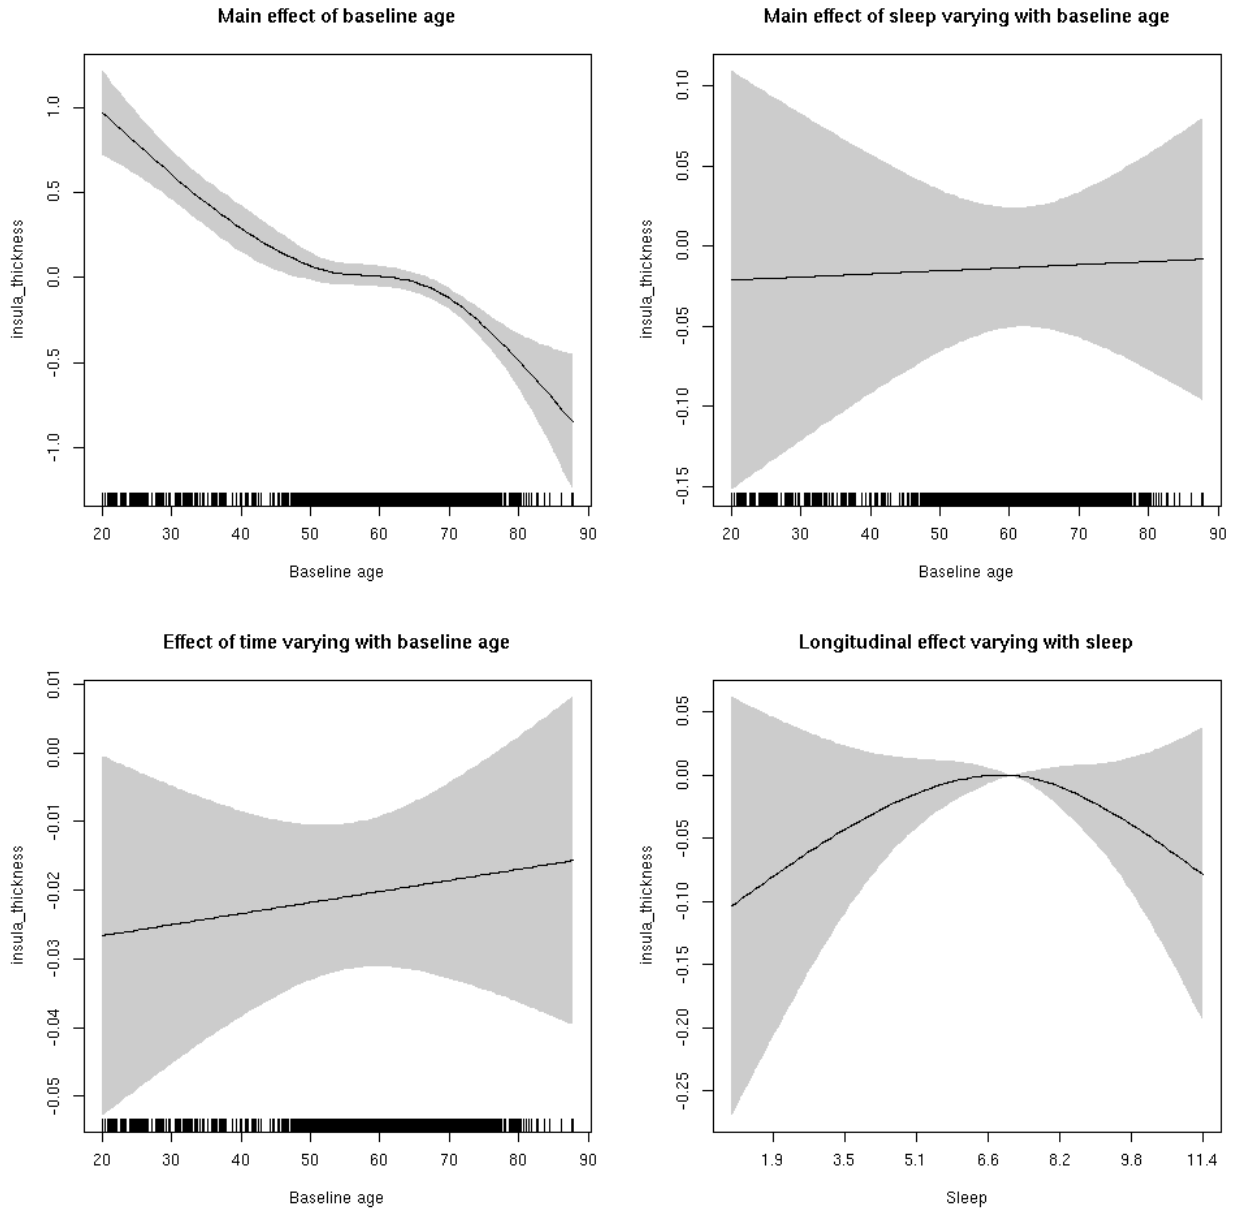

**Male: Full data** Below is the row for `s(sleep_z):time` from the model output.

```
## s(sleep_z):time  1.000  1.000  0.187  0.666
```

Below are plots of a plot of `s(bl_age)`, `s(bl_age):sleep_z`, `s(bl_age):time`, and `s(sleep_z):time`. For `s(sleep_z):time`, roughly, if we cannot fit a straight line through the confidence bands, there is evidence that the effect of time depends on sleep duration. It is correct that the confidence interval is zero at one point along the axis; this happens because we do not include the main effect.

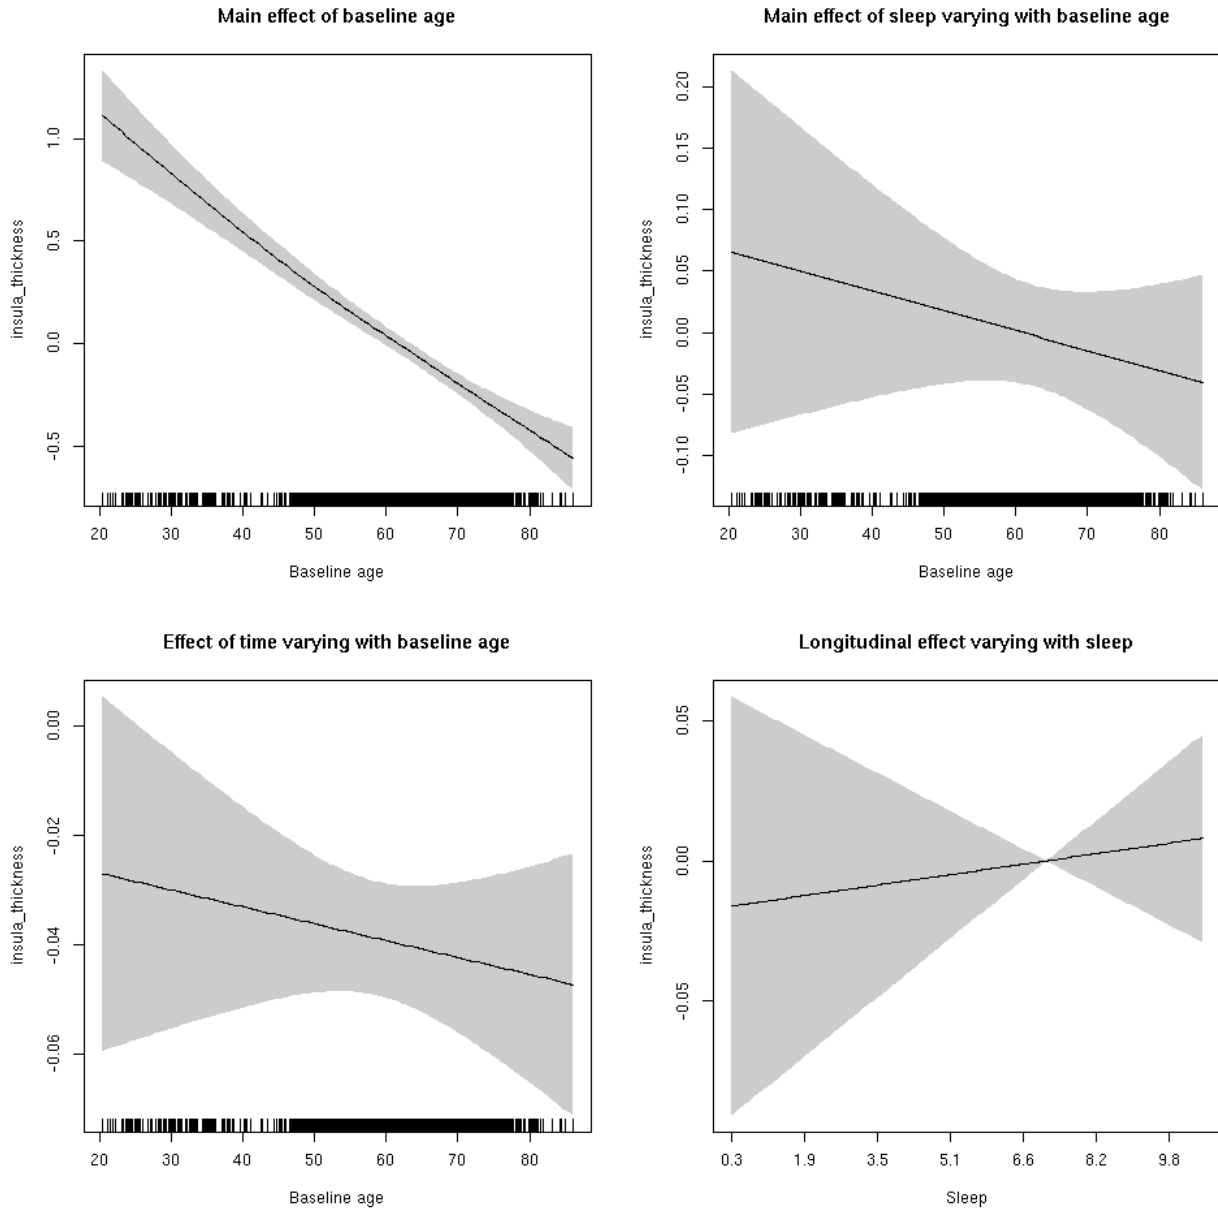

## insula\_thickness

**Full data** Below is the model output. The term `s(sleep_z):time` is probably what we care most about.

```
##
## Family: gaussian
## Link function: identity
##
## Formula:
## value ~ sex + site + s(bl_age, k = 10, bs = "cr") + s(bl_age,
##   by = sleep_z, bs = "cr") + +s(bl_age, by = time, k = 5, bs = "cr") +
##   s(sleep_z, by = time, k = 5, bs = "cr", pc = 0)
## <environment: 0x5630035d9688>
```

```

##
## Parametric coefficients:
##           Estimate Std. Error t value Pr(>|t|)
## (Intercept) -1.28050    0.05173 -24.751 < 2e-16 ***
## sexmale      0.07028    0.02588   2.715  0.00664 **
## siteousAvanto 0.10193    0.06936   1.470  0.14169
## siteousPrisma 0.44448    0.33824   1.314  0.18885
## siteousSkyra  0.31652    0.06933   4.565 5.06e-06 ***
## siteUB       0.40202    0.13627   2.950  0.00319 **
## siteUCAM     0.23196    0.07116   3.260  0.00112 **
## siteUKB      1.46116    0.05240  27.887 < 2e-16 ***
## siteUmU     -0.05222    0.08522  -0.613  0.54006
## ---
## Signif. codes:  0 '***' 0.001 '**' 0.01 '*' 0.05 '.' 0.1 ' ' 1
##
## Approximate significance of smooth terms:
##           edf Ref.df      F p-value
## s(bl_age)      3.732  3.732 81.121 <2e-16 ***
## s(bl_age):sleep_z 2.000  2.000  0.473  0.623
## s(bl_age):time  2.631  2.631 19.398 <2e-16 ***
## s(sleep_z):time  2.010  2.010  1.514  0.221
## ---
## Signif. codes:  0 '***' 0.001 '**' 0.01 '*' 0.05 '.' 0.1 ' ' 1
##
## R-sq.(adj) =  0.339
## lmer.REML = 17536 Scale est. = 0.20534 n = 8178

```

Below are plots of a plot of `s(bl_age)`, `s(bl_age):sleep_z`, `s(bl_age):time`, and `s(sleep_z):time`. For `s(sleep_z):time`, roughly, if we cannot fit a straight line through the confidence bands, there is evidence that the effect of time depends on sleep duration. It is correct that the confidence interval is zero at one point along the axis; this happens because we do not include the main effect.

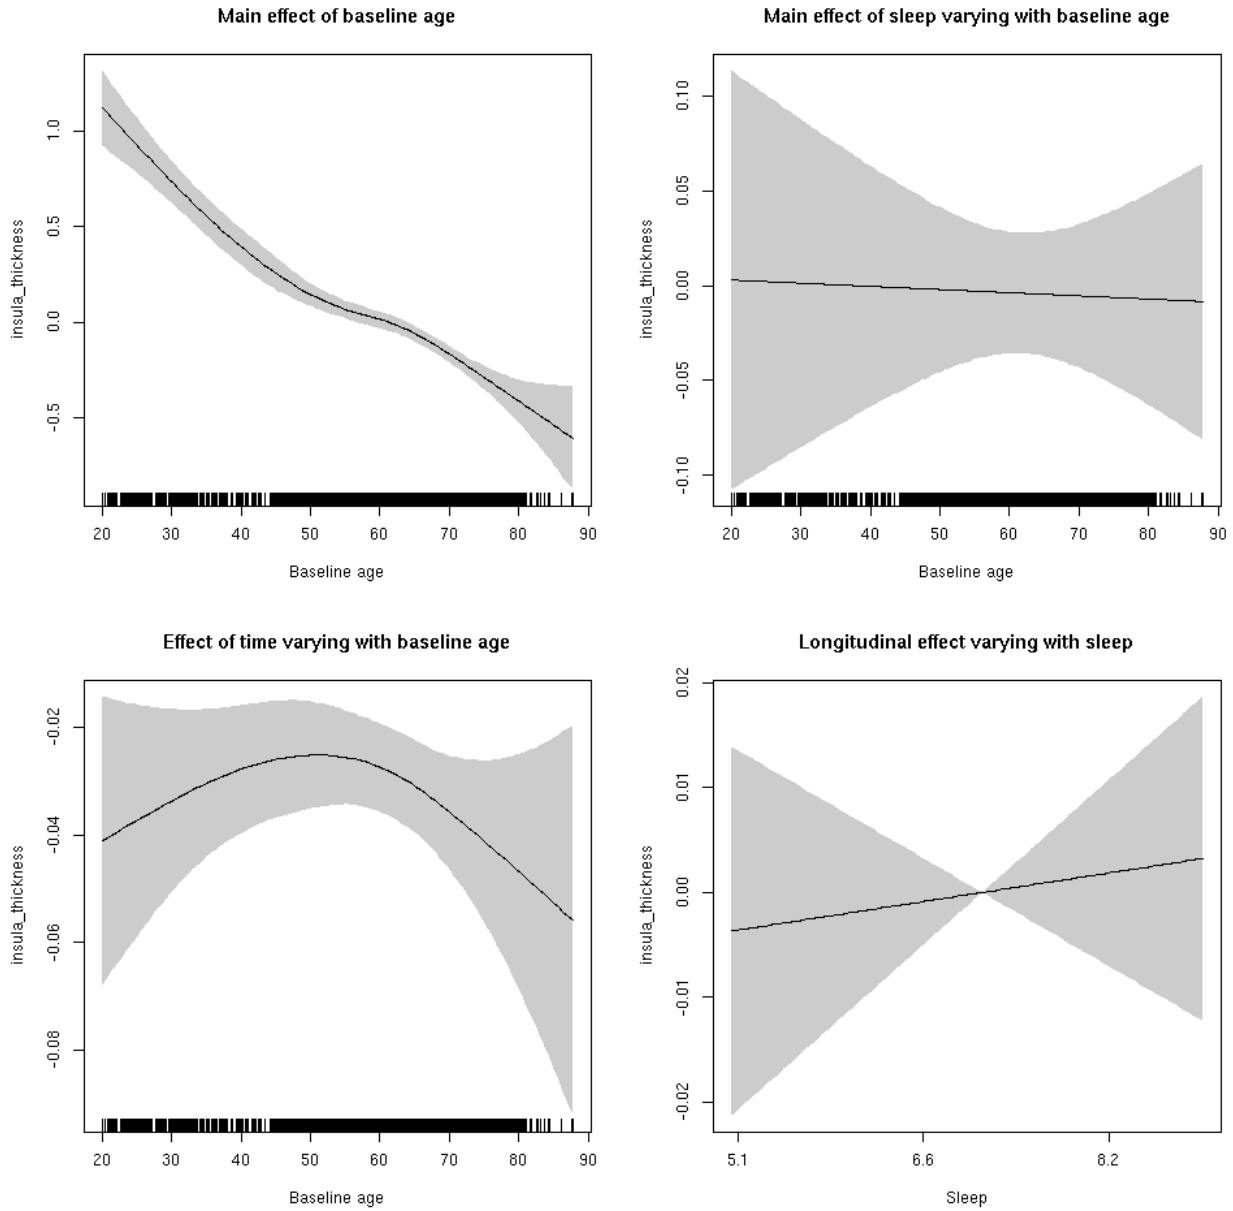

**Restricted to sleep  $\geq 5$  and  $\leq 9$  hours** Below is the row for `s(sleep_z):time` from the model output.

```
## s(sleep_z):time 1.000 1.000 0.175 0.676
```

Below are plots of a plot of `s(bl_age)`, `s(bl_age):sleep_z`, `s(bl_age):time`, and `s(sleep_z):time`. For `s(sleep_z):time`, roughly, if we cannot fit a straight line through the confidence bands, there is evidence that the effect of time depends on sleep duration. It is correct that the confidence interval is zero at one point along the axis; this happens because we do not include the main effect.



## insula\_volume: Stratified by sex

**Female: Full data** Below is the row for `s(sleep_z):time` from the model output.

```
## s(sleep_z):time  1.000  1.000  0.038  0.846
```

Below are plots of a plot of `s(bl_age)`, `s(bl_age):sleep_z`, `s(bl_age):time`, and `s(sleep_z):time`. For `s(sleep_z):time`, roughly, if we cannot fit a straight line through the confidence bands, there is evidence that the effect of time depends on sleep duration. It is correct that the confidence interval is zero at one point along the axis; this happens because we do not include the main effect.

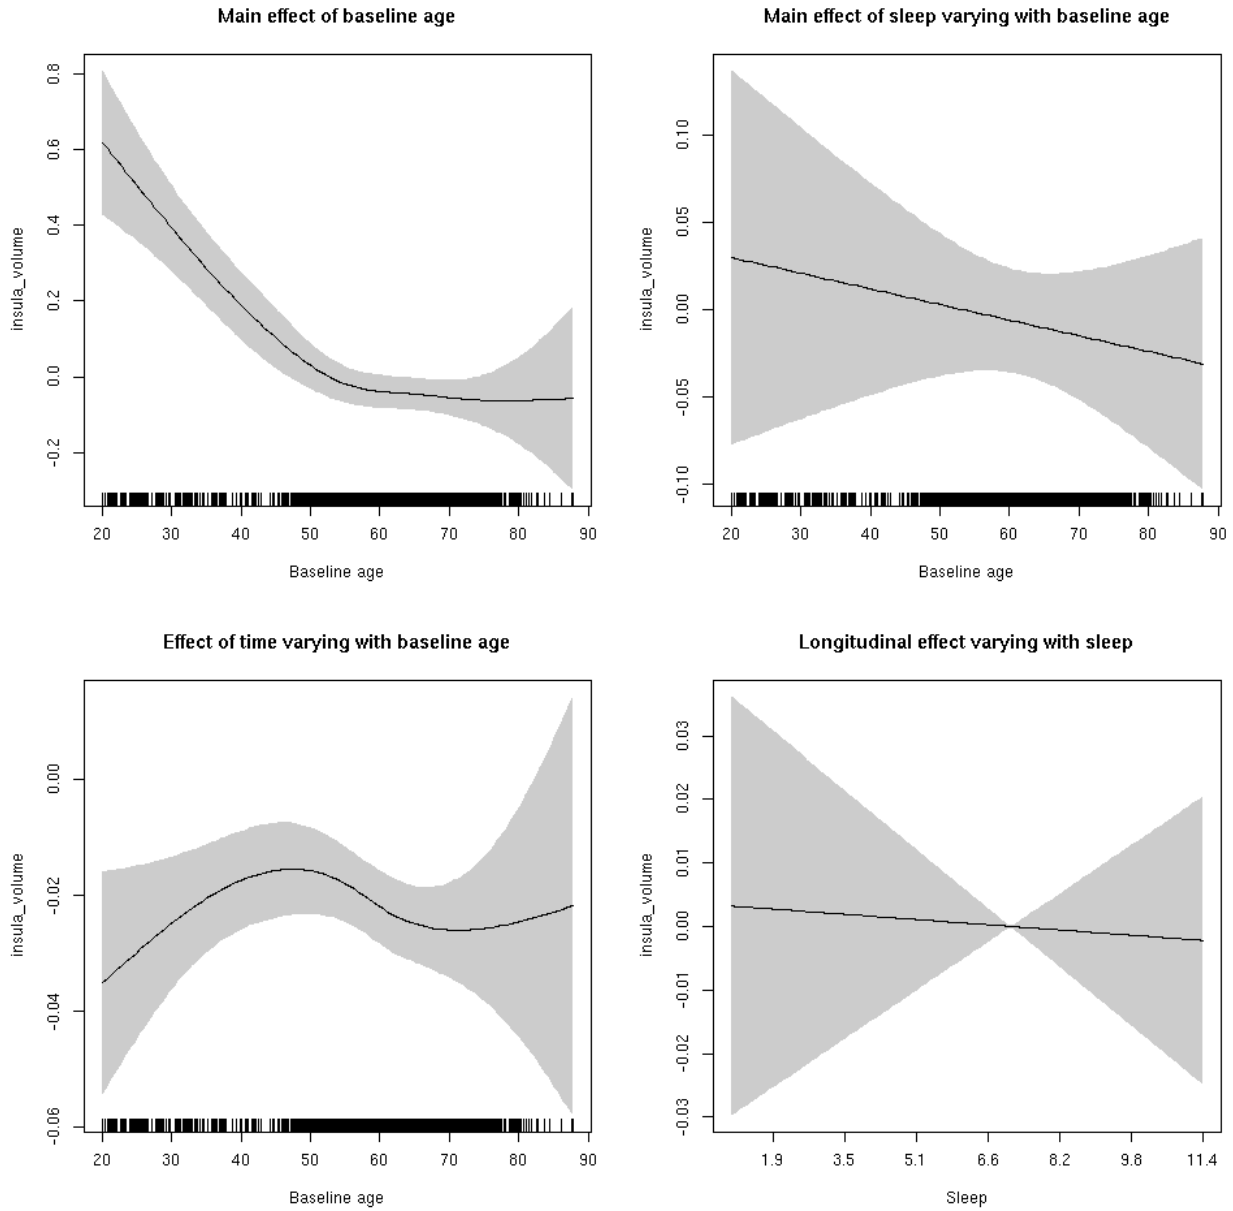

**Male: Full data** Below is the row for `s(sleep_z):time` from the model output.

```
## s(sleep_z):time  1.000  1.000  1.911  0.167
```

Below are plots of a plot of `s(bl_age)`, `s(bl_age):sleep_z`, `s(bl_age):time`, and `s(sleep_z):time`. For `s(sleep_z):time`, roughly, if we cannot fit a straight line through the confidence bands, there is evidence that the effect of time depends on sleep duration. It is correct that the confidence interval is zero at one point along the axis; this happens because we do not include the main effect.

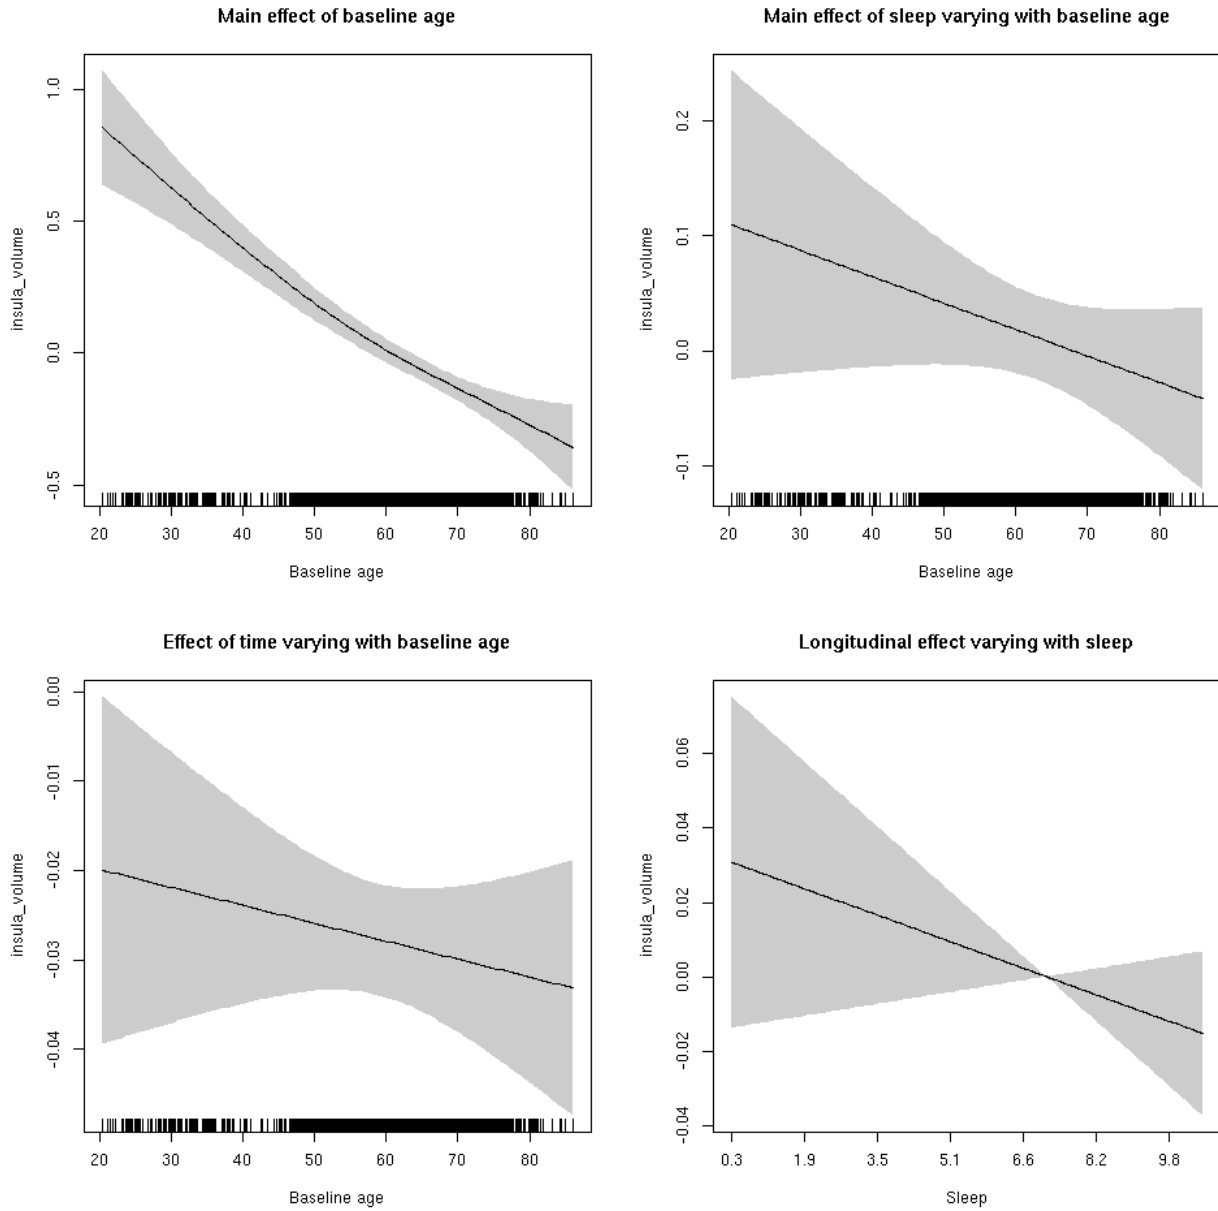

## insula\_volume

**Full data** Below is the model output. The term `s(sleep_z):time` is probably what we care most about.

```
##
## Family: gaussian
## Link function: identity
##
## Formula:
## value ~ sex + site + icv + s(bl_age, k = 10, bs = "cr") + s(bl_age,
##   by = sleep_z, bs = "cr") + +s(bl_age, by = time, k = 5, bs = "cr") +
##   s(sleep_z, by = time, k = 5, bs = "cr", pc = 0)
## <environment: 0x5630035ab250>
```



```

##
## Parametric coefficients:
##           Estimate Std. Error t value Pr(>|t|)
## (Intercept) -0.07716   0.05313  -1.452 0.146430
## sexmale      0.33824   0.02728  12.398 < 2e-16 ***
## siteousAvanto -0.67056   0.06528 -10.272 < 2e-16 ***
## siteousPrisma -0.67770   0.20164  -3.361 0.000780 ***
## siteousSkyra  -0.28406   0.06317  -4.496 7.00e-06 ***
## siteUB       -0.63435   0.12149  -5.221 1.82e-07 ***
## siteUCAM     -0.69160   0.06573 -10.521 < 2e-16 ***
## siteUKB      0.01773   0.05035   0.352 0.724773
## siteUmU     -0.27019   0.07565  -3.571 0.000357 ***
## icv         0.56999   0.01349  42.245 < 2e-16 ***
## ---
## Signif. codes:  0 '***' 0.001 '**' 0.01 '*' 0.05 '.' 0.1 ' ' 1
##
## Approximate significance of smooth terms:
##           edf Ref.df    F p-value
## s(bl_age)      2.922  2.922 53.653 <2e-16 ***
## s(bl_age):sleep_z 2.000  2.000  1.561  0.210
## s(bl_age):time  2.630  2.630 58.104 <2e-16 ***
## s(sleep_z):time  1.000  1.000  1.337  0.248
## ---
## Signif. codes:  0 '***' 0.001 '**' 0.01 '*' 0.05 '.' 0.1 ' ' 1
##
## R-sq.(adj) =  0.512
## lmer.REML = 11435  Scale est. = 0.063237  n = 8178

```

Below are plots of a plot of `s(bl_age)`, `s(bl_age):sleep_z`, `s(bl_age):time`, and `s(sleep_z):time`. For `s(sleep_z):time`, roughly, if we cannot fit a straight line through the confidence bands, there is evidence that the effect of time depends on sleep duration. It is correct that the confidence interval is zero at one point along the axis; this happens because we do not include the main effect.

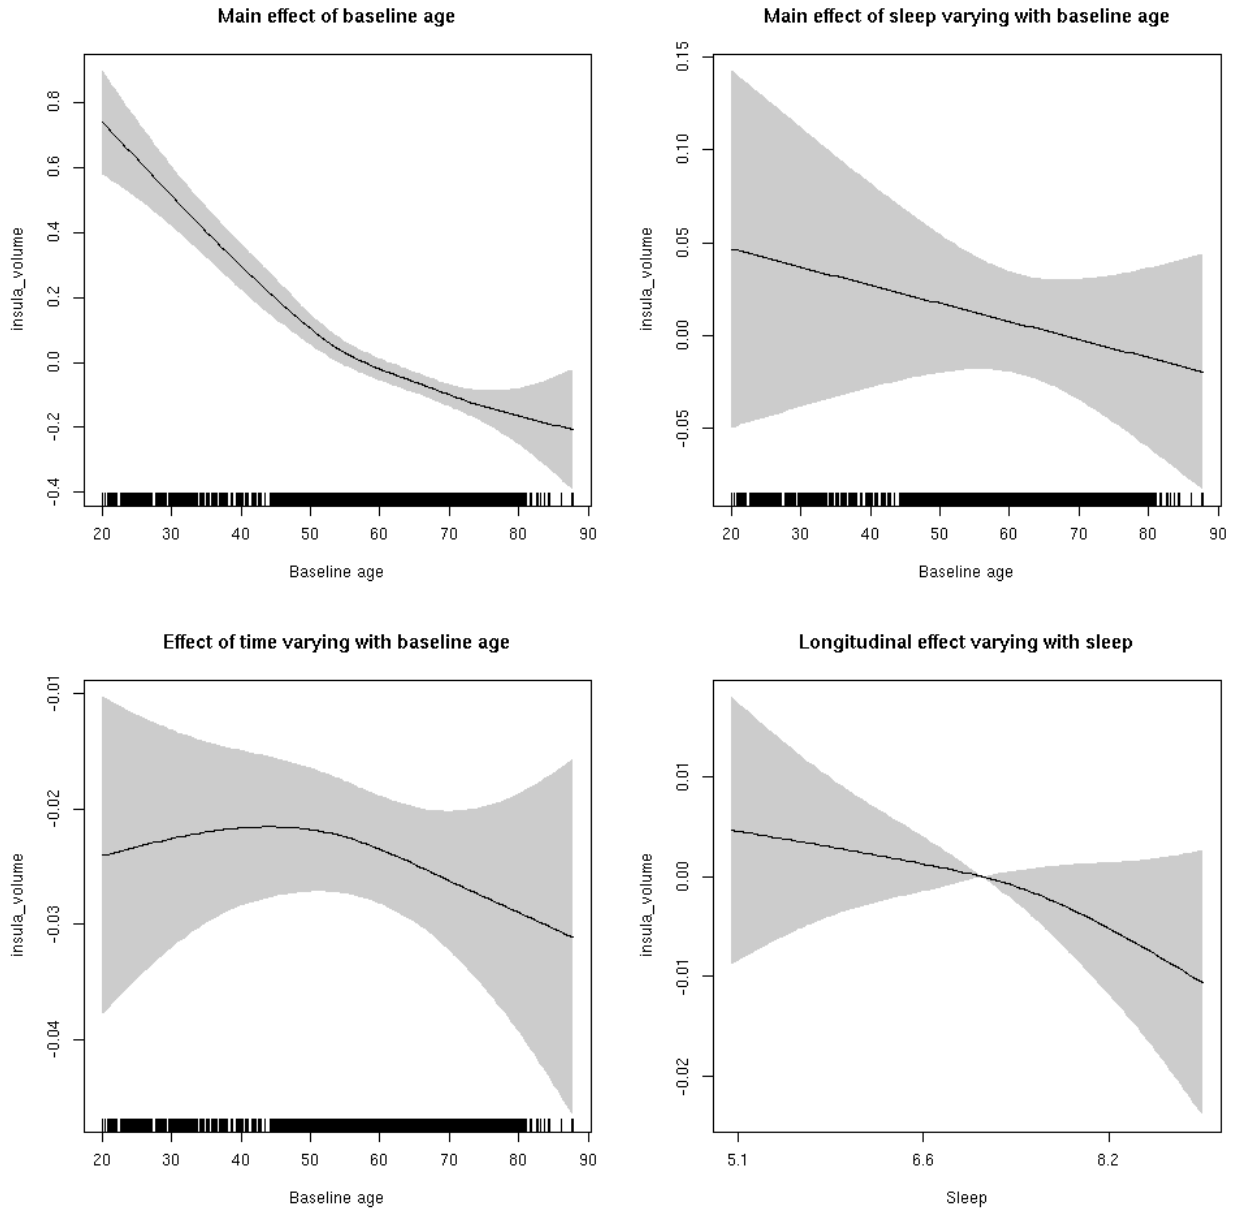

**Restricted to sleep  $\geq 5$  and  $\leq 9$  hours** Below is the row for `s(sleep_z):time` from the model output.

```
## s(sleep_z):time  1.421  1.421  1.001  0.229
```

Below are plots of a plot of `s(bl_age)`, `s(bl_age):sleep_z`, `s(bl_age):time`, and `s(sleep_z):time`. For `s(sleep_z):time`, roughly, if we cannot fit a straight line through the confidence bands, there is evidence that the effect of time depends on sleep duration. It is correct that the confidence interval is zero at one point along the axis; this happens because we do not include the main effect.



### isthmuscingulate\_area: Stratified by sex

**Female: Full data** Below is the row for `s(sleep_z):time` from the model output.

```
## s(sleep_z):time  1.000  1.000  1.246  0.264
```

Below are plots of a plot of `s(bl_age)`, `s(bl_age):sleep_z`, `s(bl_age):time`, and `s(sleep_z):time`. For `s(sleep_z):time`, roughly, if we cannot fit a straight line through the confidence bands, there is evidence that the effect of time depends on sleep duration. It is correct that the confidence interval is zero at one point along the axis; this happens because we do not include the main effect.

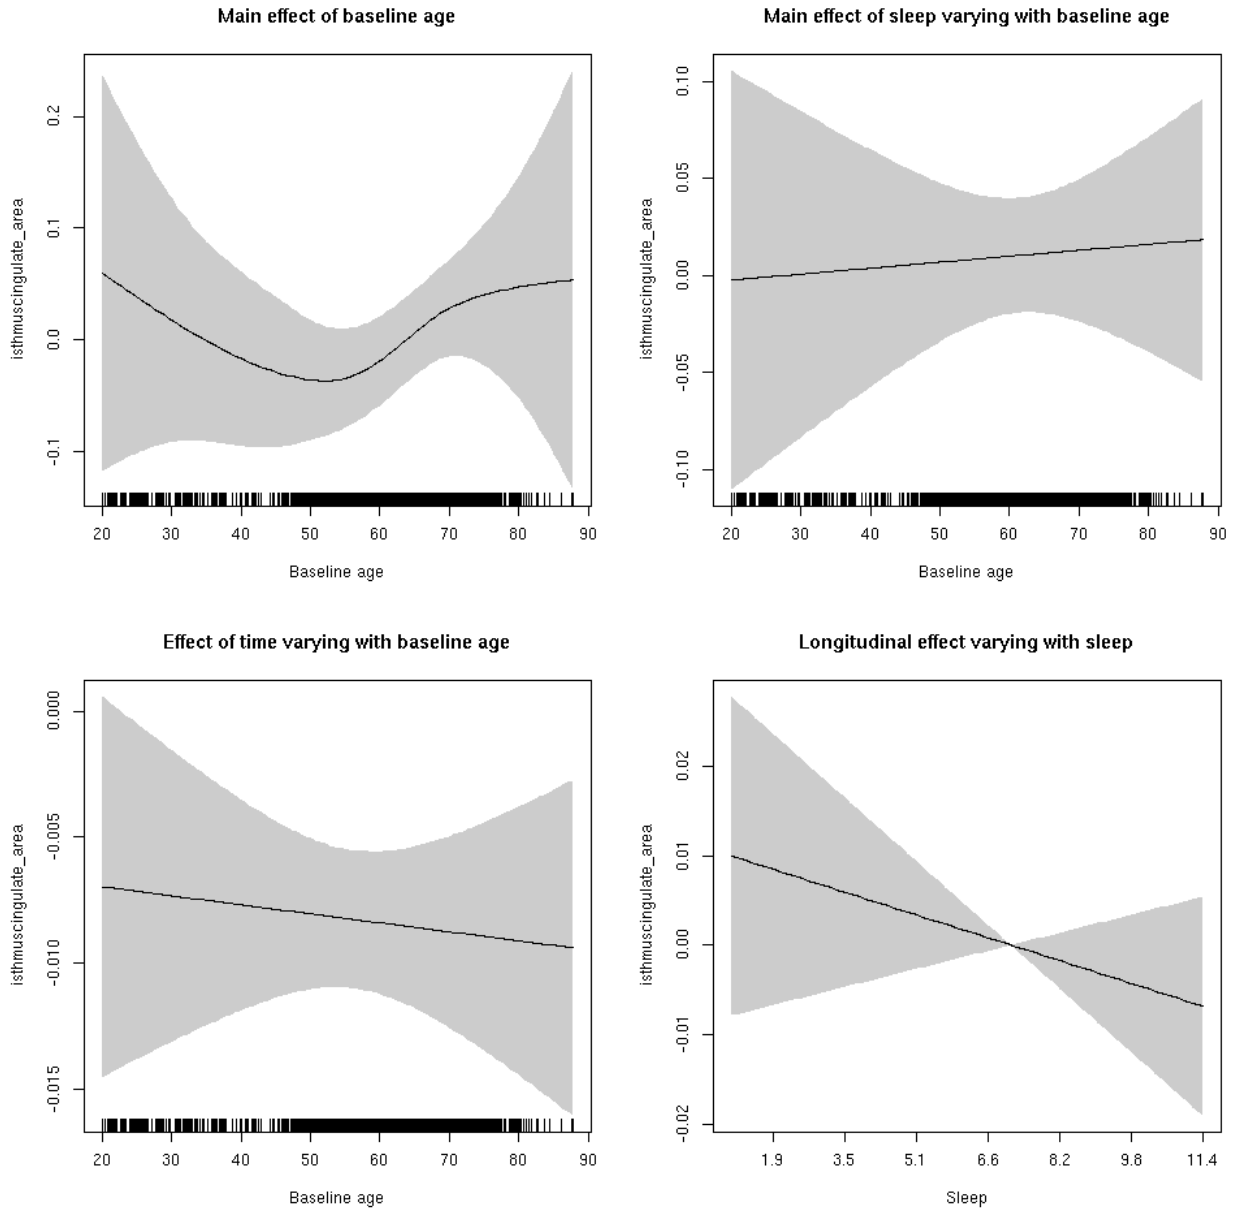

**Male: Full data** Below is the row for `s(sleep_z):time` from the model output.

```
## s(sleep_z):time      1      1 0.536 0.4642
```

Below are plots of a plot of `s(bl_age)`, `s(bl_age):sleep_z`, `s(bl_age):time`, and `s(sleep_z):time`. For `s(sleep_z):time`, roughly, if we cannot fit a straight line through the confidence bands, there is evidence that the effect of time depends on sleep duration. It is correct that the confidence interval is zero at one point along the axis; this happens because we do not include the main effect.

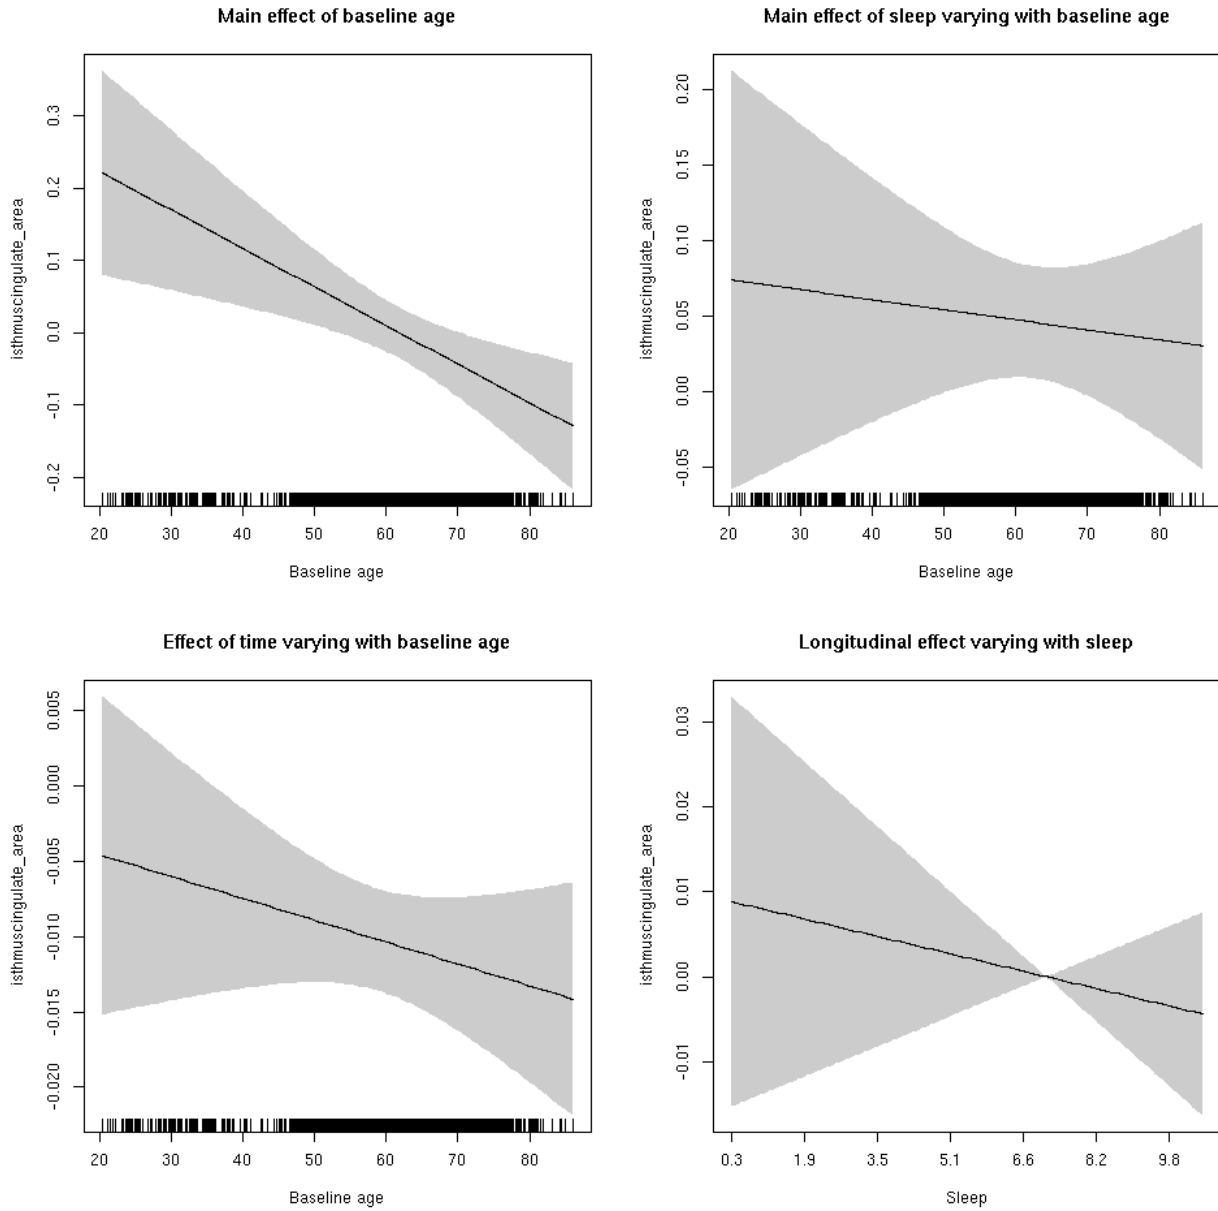

## isthmuscingulate\_area

**Full data** Below is the model output. The term `s(sleep_z):time` is probably what we care most about.

```
##
## Family: gaussian
## Link function: identity
##
## Formula:
## value ~ sex + site + icv + s(bl_age, k = 10, bs = "cr") + s(bl_age,
##   by = sleep_z, bs = "cr") + +s(bl_age, by = time, k = 5, bs = "cr") +
##   s(sleep_z, by = time, k = 5, bs = "cr", pc = 0)
## <environment: 0x5630035b5c70>
```

```

##
## Parametric coefficients:
##           Estimate Std. Error t value Pr(>|t|)
## (Intercept)  0.87704    0.05411  16.208 < 2e-16 ***
## sexmale      0.27963    0.02778  10.067 < 2e-16 ***
## siteousAvanto -0.83988    0.06586 -12.752 < 2e-16 ***
## siteousPrisma -0.77866    0.12463  -6.248 4.37e-10 ***
## siteousSkyra -0.37954    0.06381  -5.948 2.83e-09 ***
## siteUB       -0.88226    0.12506  -7.054 1.87e-12 ***
## siteUCAM     -0.80035    0.06736 -11.882 < 2e-16 ***
## siteUKB      -1.06100    0.05150 -20.600 < 2e-16 ***
## siteUmU      -0.48229    0.07754  -6.220 5.22e-10 ***
## icv          0.54267    0.01357  39.984 < 2e-16 ***
## ---
## Signif. codes:  0 '***' 0.001 '**' 0.01 '*' 0.05 '.' 0.1 ' ' 1
##
## Approximate significance of smooth terms:
##           edf Ref.df    F p-value
## s(bl_age)      3.609  3.609  1.584  0.101
## s(bl_age):sleep_z 2.000  2.000  2.036  0.131
## s(bl_age):time  2.000  2.000 36.929 <2e-16 ***
## s(sleep_z):time  1.000  1.000  1.875  0.171
## ---
## Signif. codes:  0 '***' 0.001 '**' 0.01 '*' 0.05 '.' 0.1 ' ' 1
##
## R-sq.(adj) =  0.463
## lmer.REML = 6331.7  Scale est. = 0.01838  n = 8170

```

Below are plots of a plot of `s(bl_age)`, `s(bl_age):sleep_z`, `s(bl_age):time`, and `s(sleep_z):time`. For `s(sleep_z):time`, roughly, if we cannot fit a straight line through the confidence bands, there is evidence that the effect of time depends on sleep duration. It is correct that the confidence interval is zero at one point along the axis; this happens because we do not include the main effect.

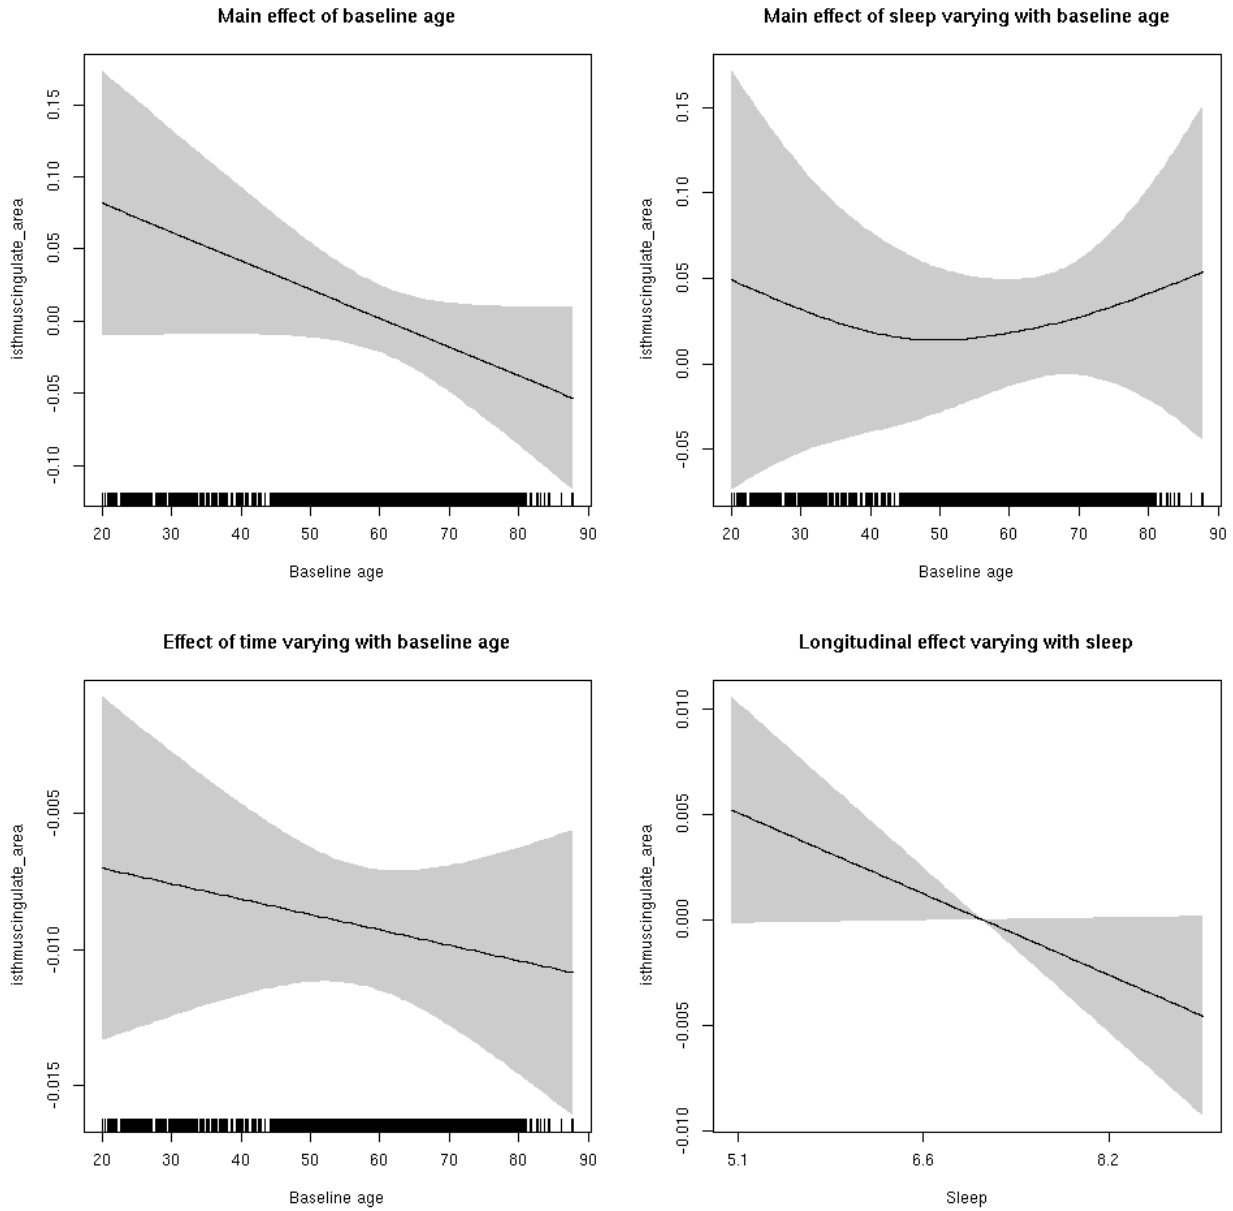

**Restricted to sleep  $\geq 5$  and  $\leq 9$  hours** Below is the row for `s(sleep_z):time` from the model output.

```
## s(sleep_z):time  1.000  1.000  3.735  0.0533 .
```

Below are plots of a plot of `s(bl_age)`, `s(bl_age):sleep_z`, `s(bl_age):time`, and `s(sleep_z):time`. For `s(sleep_z):time`, roughly, if we cannot fit a straight line through the confidence bands, there is evidence that the effect of time depends on sleep duration. It is correct that the confidence interval is zero at one point along the axis; this happens because we do not include the main effect.



## isthmuscingulate\_thickness: Stratified by sex

**Female: Full data** Below is the row for `s(sleep_z):time` from the model output.

```
## s(sleep_z):time  1.000  1.000  0.001  0.969
```

Below are plots of a plot of `s(bl_age)`, `s(bl_age):sleep_z`, `s(bl_age):time`, and `s(sleep_z):time`. For `s(sleep_z):time`, roughly, if we cannot fit a straight line through the confidence bands, there is evidence that the effect of time depends on sleep duration. It is correct that the confidence interval is zero at one point along the axis; this happens because we do not include the main effect.



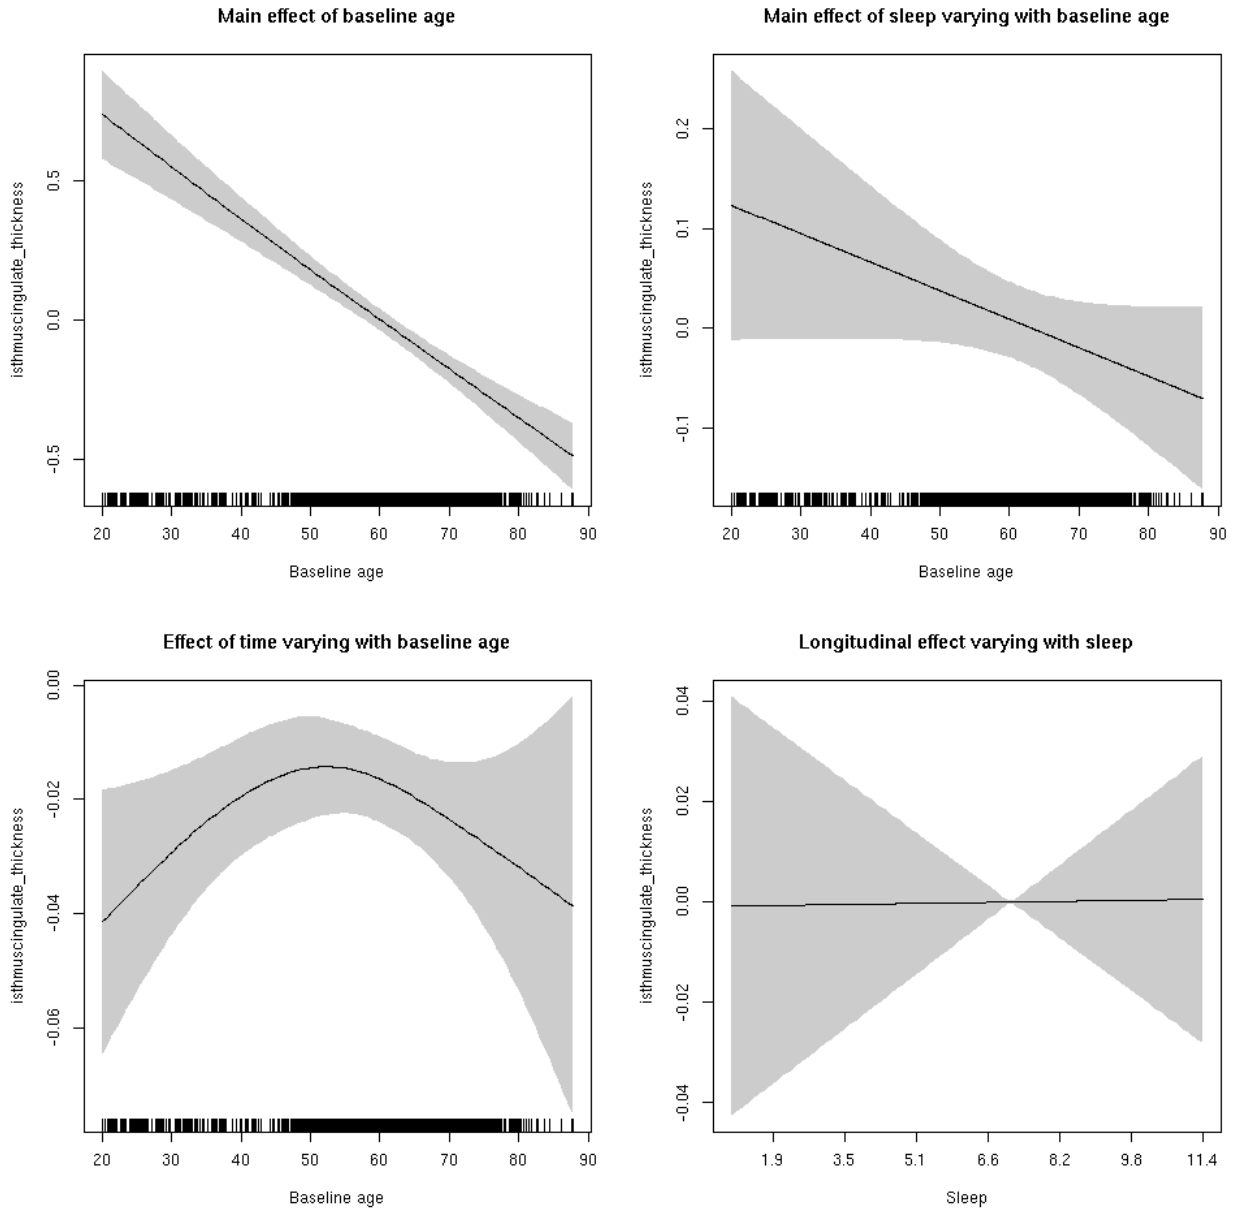

**Male: Full data** Below is the row for `s(sleep_z):time` from the model output.

```
## s(sleep_z):time      1      1  0.564  0.453
```

Below are plots of a plot of `s(bl_age)`, `s(bl_age):sleep_z`, `s(bl_age):time`, and `s(sleep_z):time`. For `s(sleep_z):time`, roughly, if we cannot fit a straight line through the confidence bands, there is evidence that the effect of time depends on sleep duration. It is correct that the confidence interval is zero at one point along the axis; this happens because we do not include the main effect.

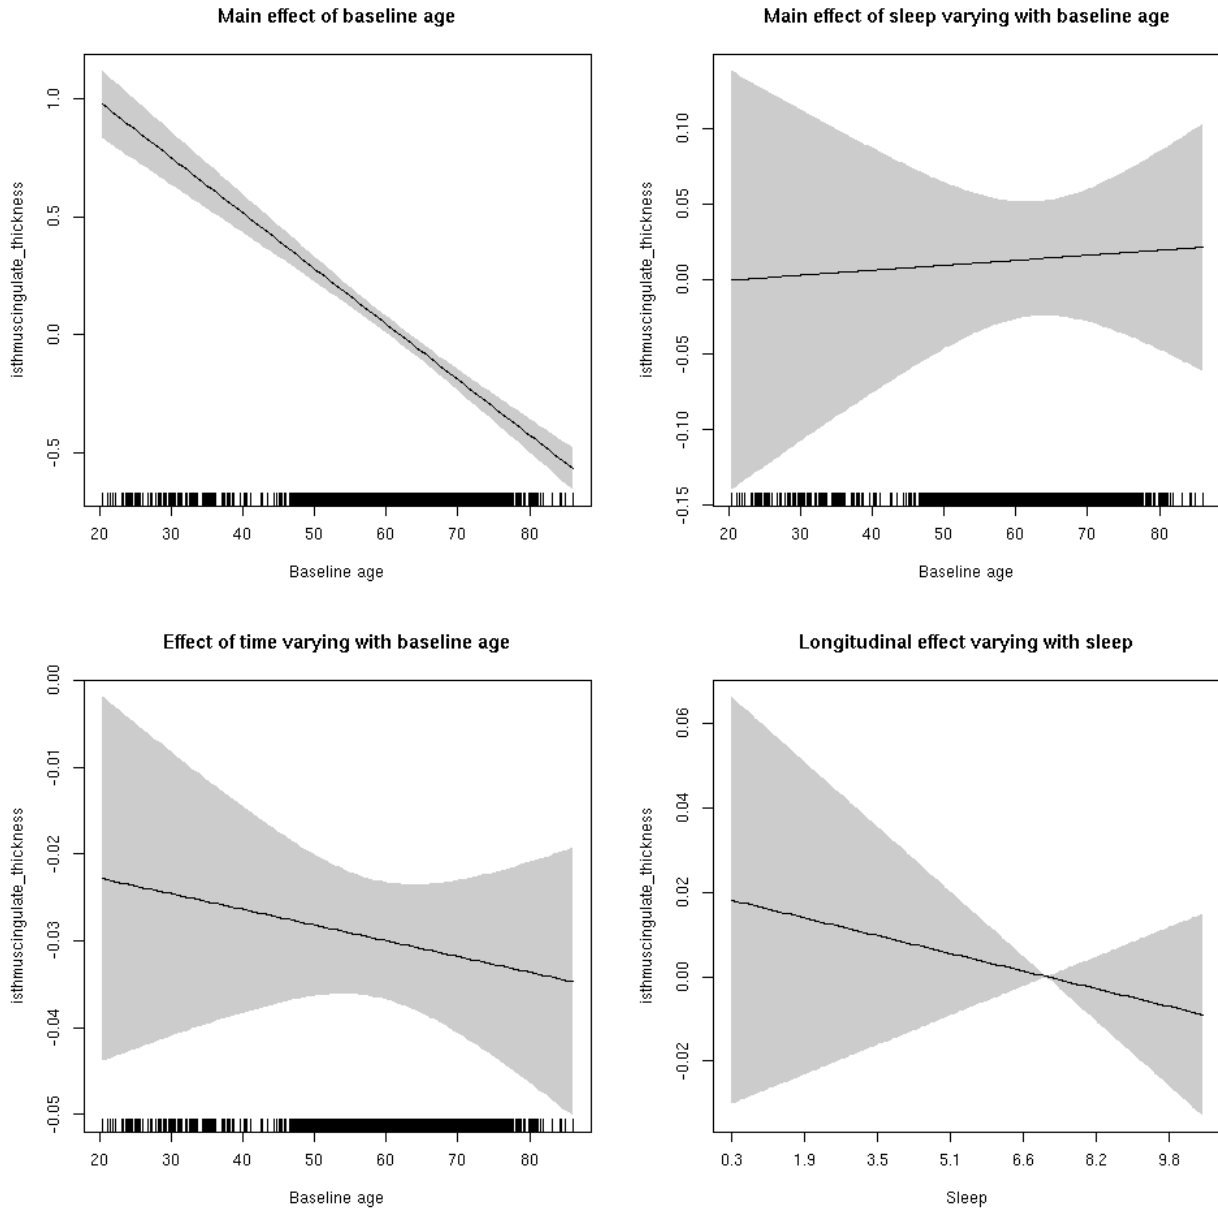

## isthmuscingulate\_thickness

**Full data** Below is the model output. The term `s(sleep_z):time` is probably what we care most about.

```
##
## Family: gaussian
## Link function: identity
##
## Formula:
## value ~ sex + site + s(bl_age, k = 10, bs = "cr") + s(bl_age,
##   by = sleep_z, bs = "cr") + +s(bl_age, by = time, k = 5, bs = "cr") +
##   s(sleep_z, by = time, k = 5, bs = "cr", pc = 0)
## <environment: 0x5630035d3810>
```

```

##
## Parametric coefficients:
##           Estimate Std. Error t value Pr(>|t|)
## (Intercept) -1.64518    0.05137 -32.027 < 2e-16 ***
## sexmale     -0.13198    0.02573  -5.129 2.99e-07 ***
## siteousAvanto 0.23924    0.06749   3.545 0.000395 ***
## siteousPrisma 0.28800    0.23166   1.243 0.213829
## siteousSkyra  0.39181    0.06747   5.807 6.60e-09 ***
## siteUB       0.57565    0.13709   4.199 2.71e-05 ***
## siteUCAM     0.29750    0.07096   4.192 2.79e-05 ***
## siteUKB      1.96540    0.05219  37.658 < 2e-16 ***
## siteUmU      0.58615    0.08463   6.926 4.67e-12 ***
## ---
## Signif. codes:  0 '***' 0.001 '**' 0.01 '*' 0.05 '.' 0.1 ' ' 1
##
## Approximate significance of smooth terms:
##           edf Ref.df      F p-value
## s(bl_age)      4.482  4.482 66.315 <2e-16 ***
## s(bl_age):sleep_z 2.000  2.000  0.580  0.560
## s(bl_age):time  3.220  3.220 37.820 <2e-16 ***
## s(sleep_z):time 1.000  1.000  0.175  0.676
## ---
## Signif. codes:  0 '***' 0.001 '**' 0.01 '*' 0.05 '.' 0.1 ' ' 1
##
## R-sq.(adj) =  0.473
## lmer.REML = 13784 Scale est. = 0.086341 n = 8176

```

Below are plots of a plot of `s(bl_age)`, `s(bl_age):sleep_z`, `s(bl_age):time`, and `s(sleep_z):time`. For `s(sleep_z):time`, roughly, if we cannot fit a straight line through the confidence bands, there is evidence that the effect of time depends on sleep duration. It is correct that the confidence interval is zero at one point along the axis; this happens because we do not include the main effect.

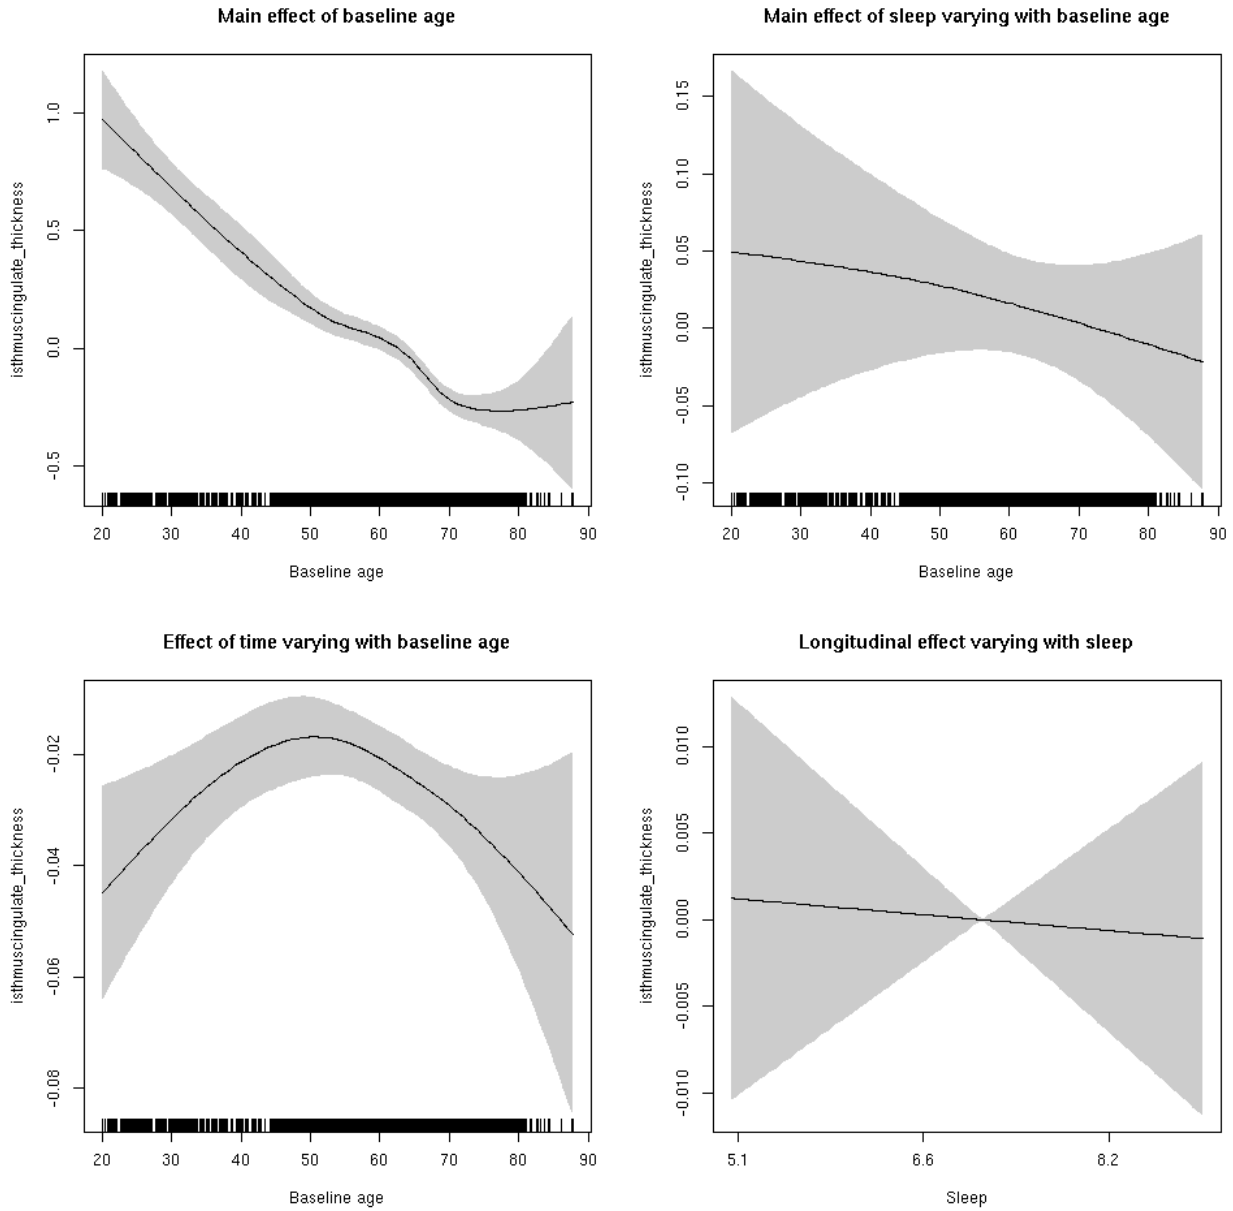

**Restricted to sleep  $\geq 5$  and  $\leq 9$  hours** Below is the row for `s(sleep_z):time` from the model output.

```
## s(sleep_z):time  1.000  1.000  0.045  0.831
```

Below are plots of a plot of `s(bl_age)`, `s(bl_age):sleep_z`, `s(bl_age):time`, and `s(sleep_z):time`. For `s(sleep_z):time`, roughly, if we cannot fit a straight line through the confidence bands, there is evidence that the effect of time depends on sleep duration. It is correct that the confidence interval is zero at one point along the axis; this happens because we do not include the main effect.

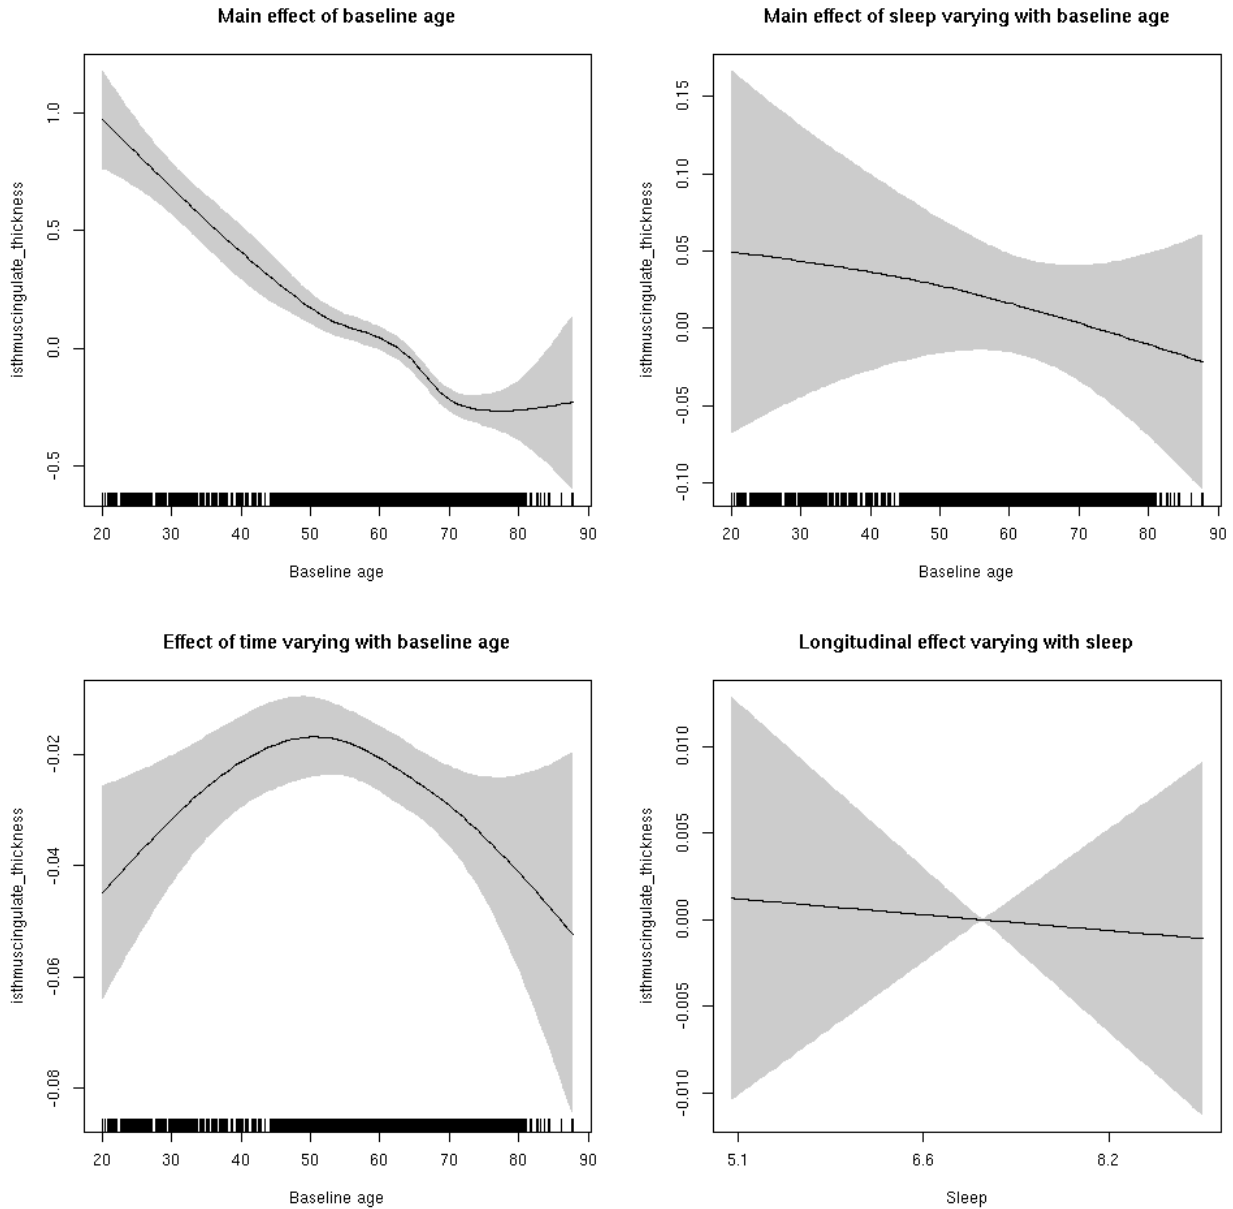

## isthmuscingulate\_volume: Stratified by sex

**Female: Full data** Below is the row for `s(sleep_z):time` from the model output.

```
## s(sleep_z):time  1.000  1.000  0.179  0.672
```

Below are plots of a plot of `s(bl_age)`, `s(bl_age):sleep_z`, `s(bl_age):time`, and `s(sleep_z):time`. For `s(sleep_z):time`, roughly, if we cannot fit a straight line through the confidence bands, there is evidence that the effect of time depends on sleep duration. It is correct that the confidence interval is zero at one point along the axis; this happens because we do not include the main effect.

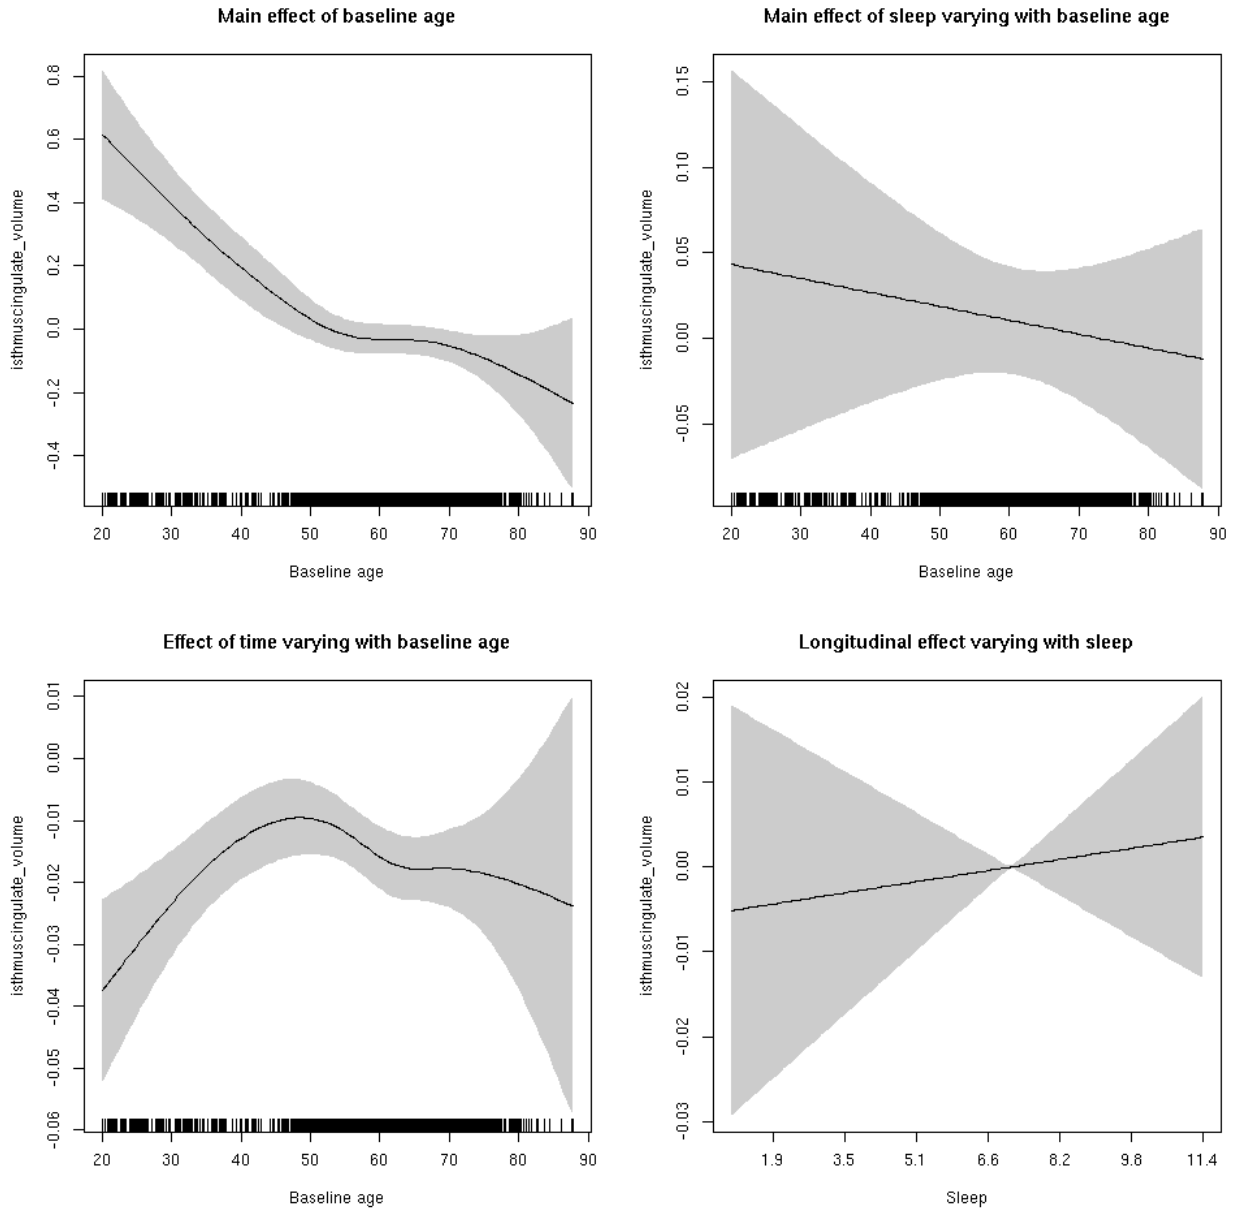

**Male: Full data** Below is the row for `s(sleep_z):time` from the model output.

```
## s(sleep_z):time  1.000  1.000  0.430  0.512
```

Below are plots of a plot of `s(bl_age)`, `s(bl_age):sleep_z`, `s(bl_age):time`, and `s(sleep_z):time`. For `s(sleep_z):time`, roughly, if we cannot fit a straight line through the confidence bands, there is evidence that the effect of time depends on sleep duration. It is correct that the confidence interval is zero at one point along the axis; this happens because we do not include the main effect.

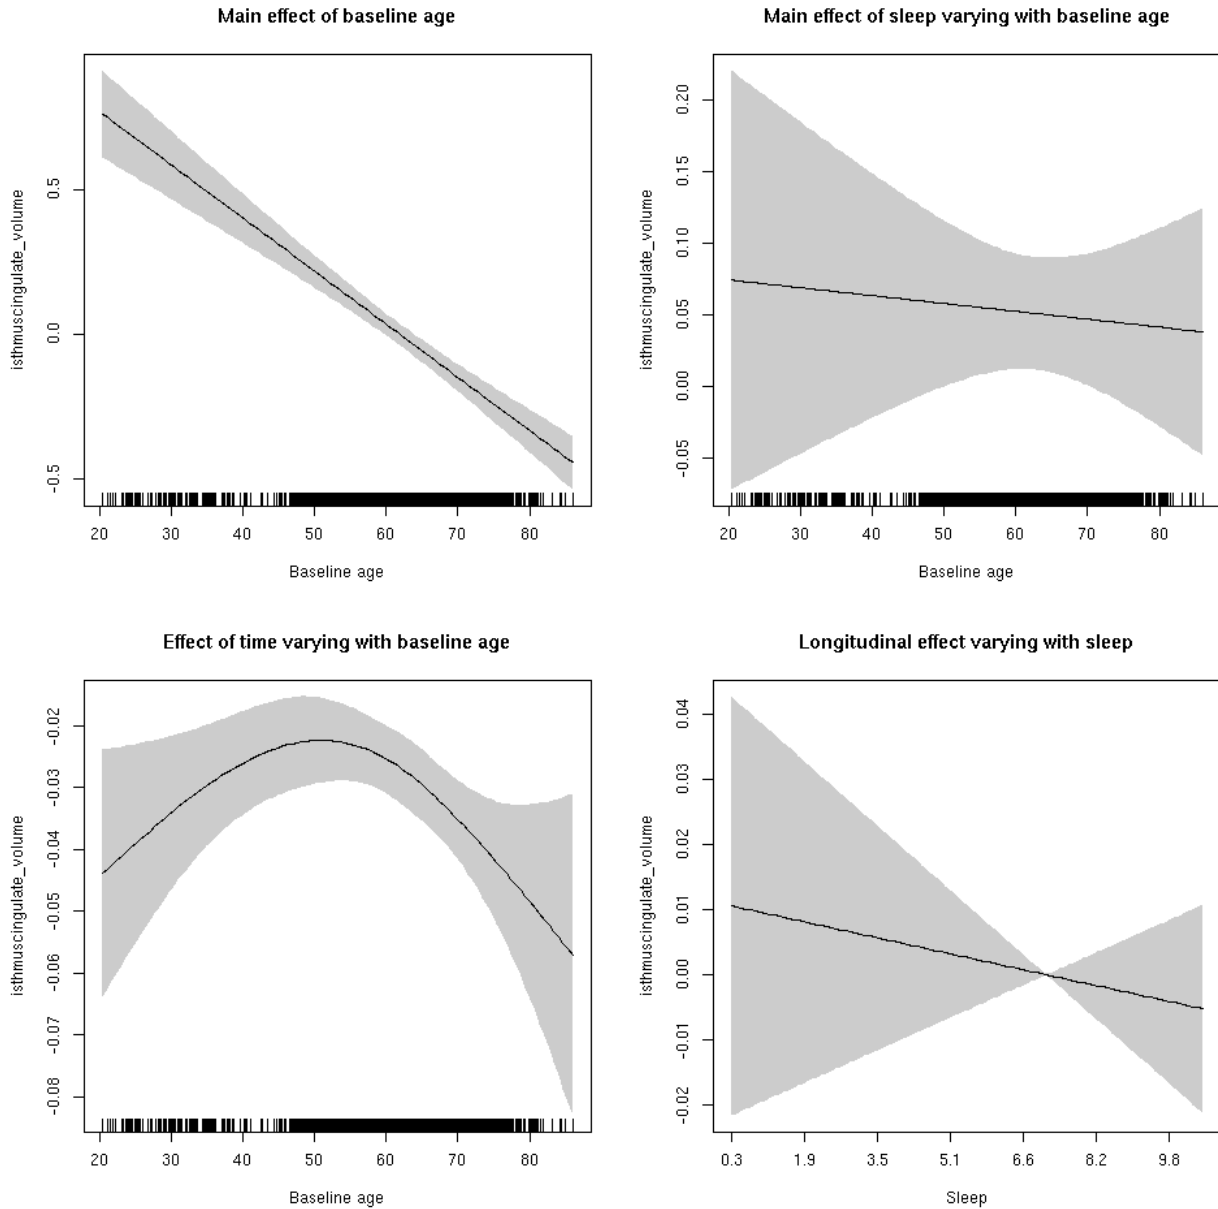

## isthmuscingulate\_volume

**Full data** Below is the model output. The term `s(sleep_z):time` is probably what we care most about.

```
##
## Family: gaussian
## Link function: identity
##
## Formula:
## value ~ sex + site + icv + s(bl_age, k = 10, bs = "cr") + s(bl_age,
##   by = sleep_z, bs = "cr") + +s(bl_age, by = time, k = 5, bs = "cr") +
##   s(sleep_z, by = time, k = 5, bs = "cr", pc = 0)
## <environment: 0x5630035ab650>
```

```

##
## Parametric coefficients:
##           Estimate Std. Error t value Pr(>|t|)
## (Intercept) -0.20083   0.05708  -3.519 0.000436 ***
## sexmale      0.26042   0.02932   8.881 < 2e-16 ***
## siteousAvanto -0.61215  0.06964  -8.790 < 2e-16 ***
## siteousPrisma -0.45994  0.15615  -2.945 0.003234 **
## siteousSkyra  0.06533  0.06743   0.969 0.332639
## siteUB       -0.38888  0.13153  -2.956 0.003121 **
## siteUCAM     -0.41922  0.07078  -5.923 3.29e-09 ***
## siteUKB      0.18834  0.05419   3.475 0.000513 ***
## siteUmU     -0.07121  0.08148  -0.874 0.382216
## icv         0.49279  0.01441  34.188 < 2e-16 ***
## ---
## Signif. codes:  0 '***' 0.001 '**' 0.01 '*' 0.05 '.' 0.1 ' ' 1
##
## Approximate significance of smooth terms:
##           edf Ref.df    F p-value
## s(bl_age)      2.999  2.999 49.309 <2e-16 ***
## s(bl_age):sleep_z 2.000  2.000  2.258  0.105
## s(bl_age):time  3.611  3.611 48.454 <2e-16 ***
## s(sleep_z):time  2.454  2.454  1.198  0.404
## ---
## Signif. codes:  0 '***' 0.001 '**' 0.01 '*' 0.05 '.' 0.1 ' ' 1
##
## R-sq.(adj) =  0.43
## lmer.REML = 9204.3  Scale est. = 0.032697  n = 8171

```

Below are plots of a plot of  $s(\text{bl\_age})$ ,  $s(\text{bl\_age}):\text{sleep\_z}$ ,  $s(\text{bl\_age}):\text{time}$ , and  $s(\text{sleep\_z}):\text{time}$ . For  $s(\text{sleep\_z}):\text{time}$ , roughly, if we cannot fit a straight line through the confidence bands, there is evidence that the effect of time depends on sleep duration. It is correct that the confidence interval is zero at one point along the axis; this happens because we do not include the main effect.



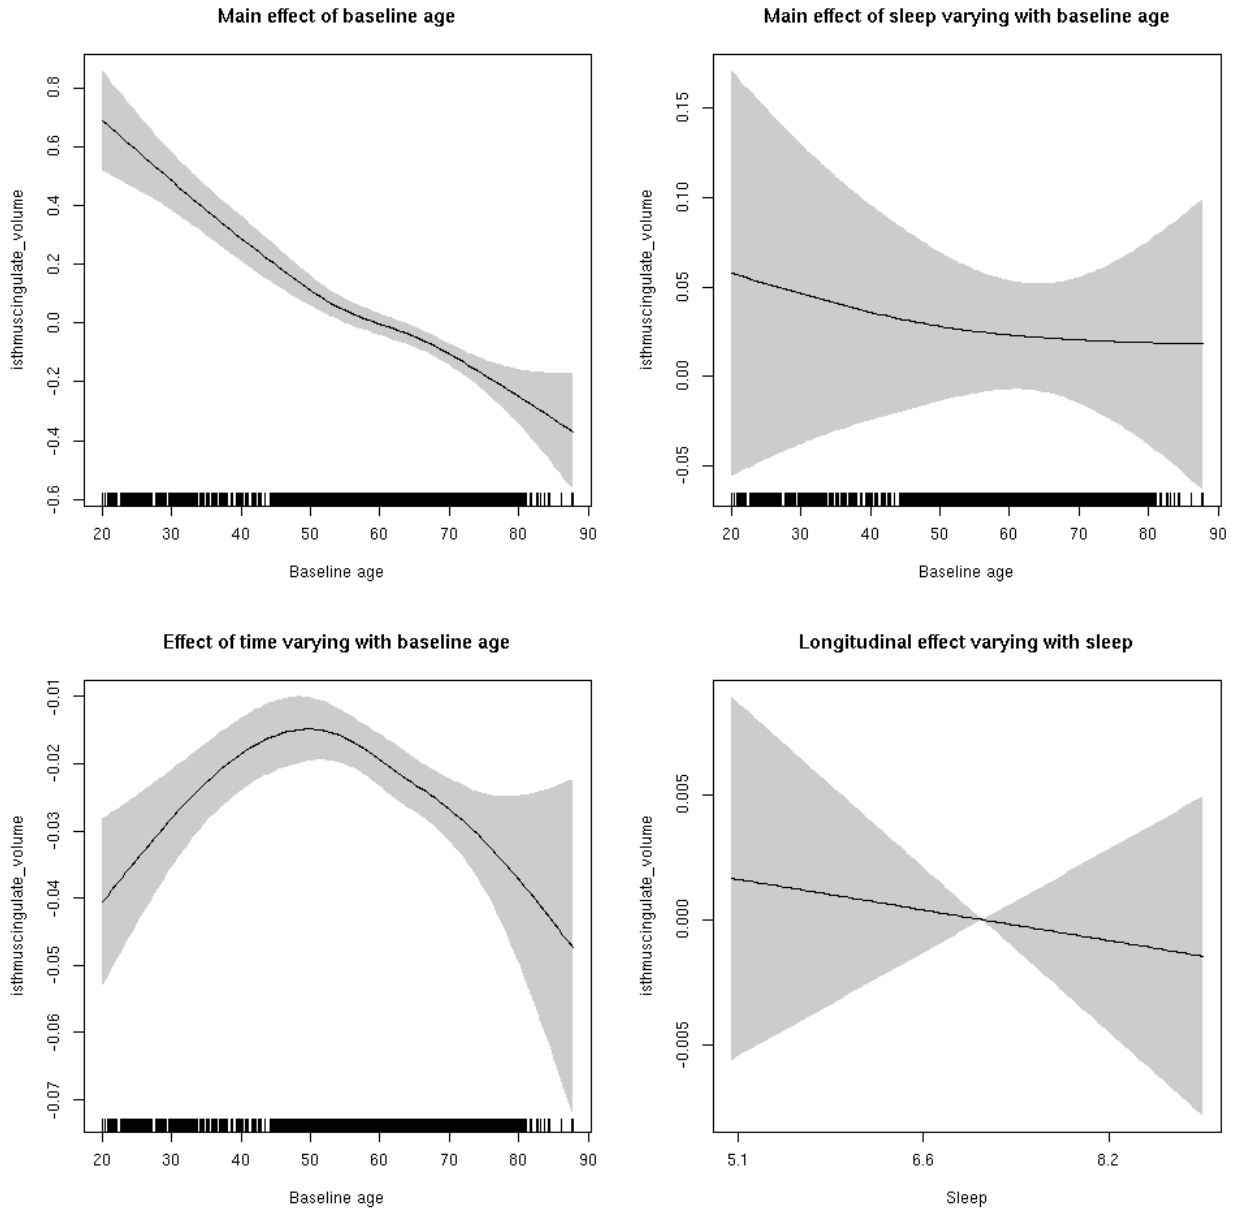

**Restricted to sleep  $\geq 5$  and  $\leq 9$  hours** Below is the row for `s(sleep_z):time` from the model output.

```
## s(sleep_z):time  1.000  1.000  0.208  0.648
```

Below are plots of a plot of `s(bl_age)`, `s(bl_age):sleep_z`, `s(bl_age):time`, and `s(sleep_z):time`. For `s(sleep_z):time`, roughly, if we cannot fit a straight line through the confidence bands, there is evidence that the effect of time depends on sleep duration. It is correct that the confidence interval is zero at one point along the axis; this happens because we do not include the main effect.

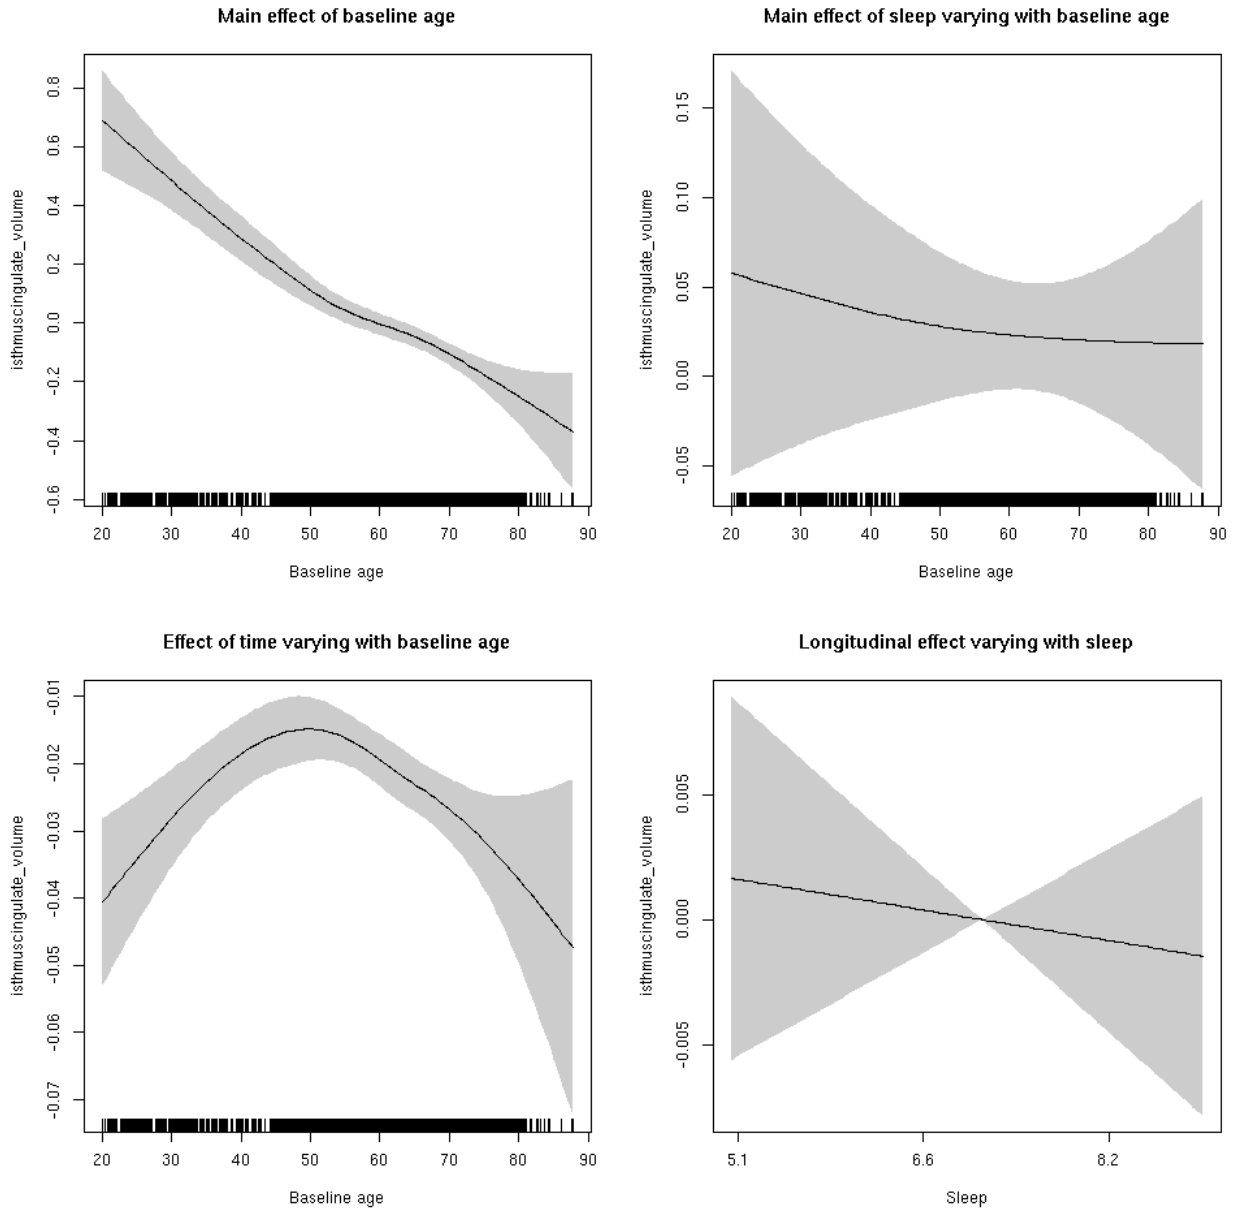

## lateraloccipital\_area: Stratified by sex

**Female: Full data** Below is the row for `s(sleep_z):time` from the model output.

```
## s(sleep_z):time  1.000  1.000  1.501  0.221
```

Below are plots of a plot of `s(bl_age)`, `s(bl_age):sleep_z`, `s(bl_age):time`, and `s(sleep_z):time`. For `s(sleep_z):time`, roughly, if we cannot fit a straight line through the confidence bands, there is evidence that the effect of time depends on sleep duration. It is correct that the confidence interval is zero at one point along the axis; this happens because we do not include the main effect.

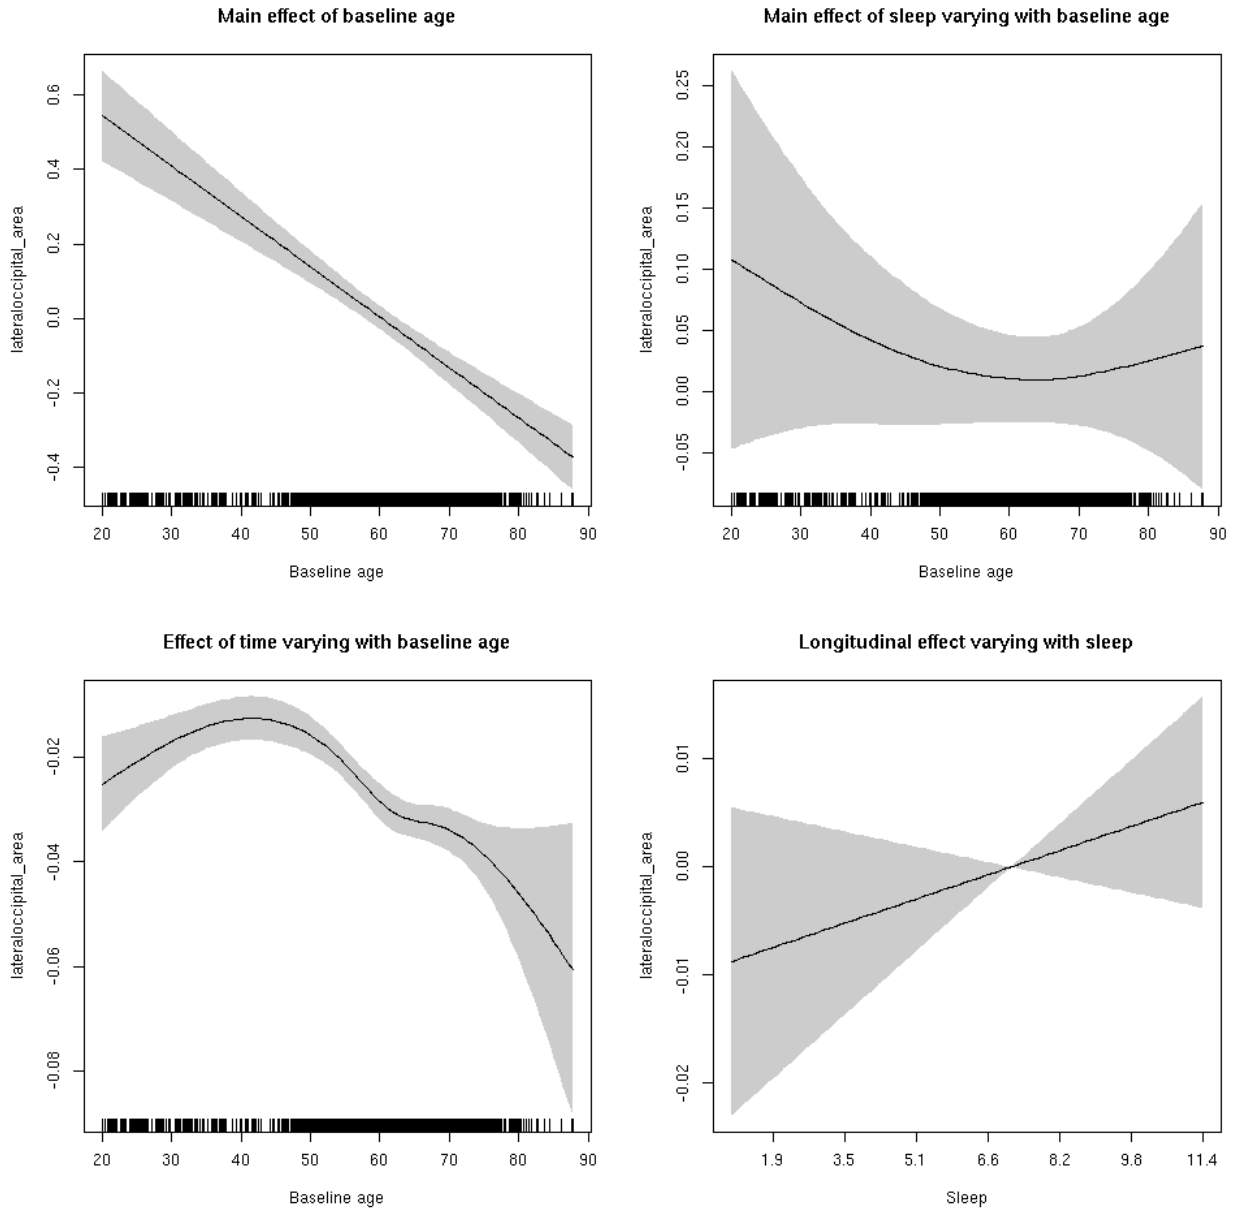

**Male: Full data** Below is the row for `s(sleep_z):time` from the model output.

```
## s(sleep_z):time      1      1  0.855  0.355
```

Below are plots of a plot of `s(bl_age)`, `s(bl_age):sleep_z`, `s(bl_age):time`, and `s(sleep_z):time`. For `s(sleep_z):time`, roughly, if we cannot fit a straight line through the confidence bands, there is evidence that the effect of time depends on sleep duration. It is correct that the confidence interval is zero at one point along the axis; this happens because we do not include the main effect.

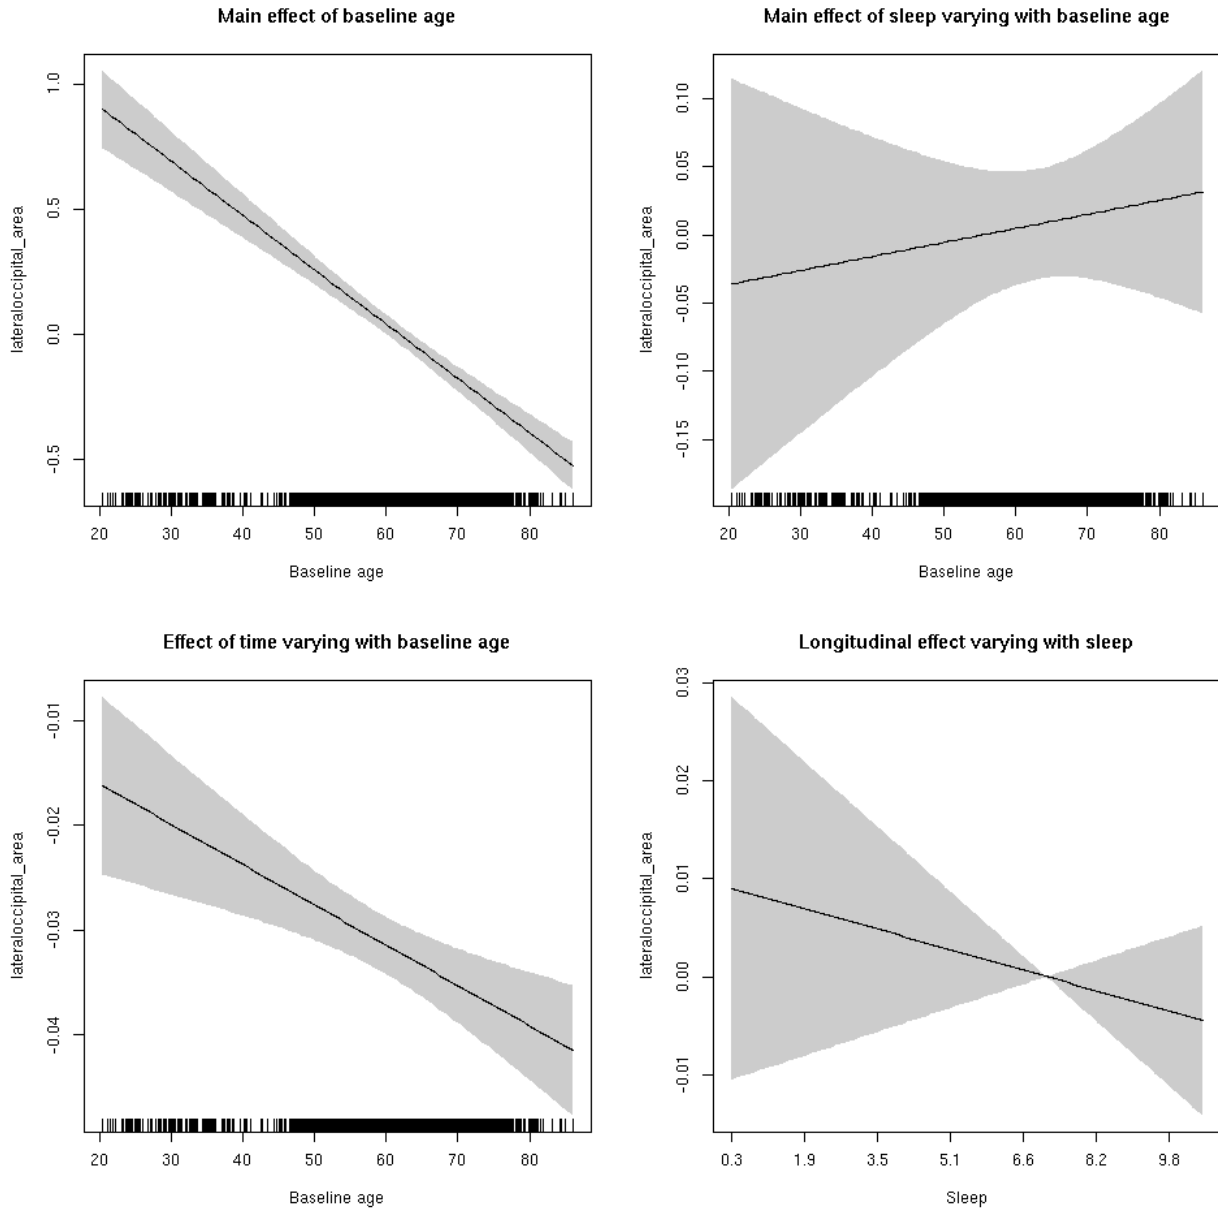

## lateraloccipital\_area

**Full data** Below is the model output. The term `s(sleep_z):time` is probably what we care most about.

```
##
## Family: gaussian
## Link function: identity
##
## Formula:
## value ~ sex + site + icv + s(bl_age, k = 10, bs = "cr") + s(bl_age,
##   by = sleep_z, bs = "cr") + +s(bl_age, by = time, k = 5, bs = "cr") +
##   s(sleep_z, by = time, k = 5, bs = "cr", pc = 0)
## <environment: 0x5630035b3260>
```

```

##
## Parametric coefficients:
##           Estimate Std. Error t value Pr(>|t|)
## (Intercept)  0.18924    0.05694   3.324 0.000892 ***
## sexmale      0.49916    0.02959  16.869 < 2e-16 ***
## siteousAvanto -0.43565    0.07007  -6.217 5.32e-10 ***
## siteousPrisma -0.71909    0.11077  -6.492 8.99e-11 ***
## siteousSkyra  -0.04920    0.06794  -0.724 0.468941
## siteUB       -0.76612    0.13404  -5.716 1.13e-08 ***
## siteUCAM     -0.42116    0.07142  -5.897 3.85e-09 ***
## siteUKB      -0.38282    0.05322  -7.193 6.92e-13 ***
## siteUmU      0.05486    0.08245   0.665 0.505814
## icv          0.41477    0.01421  29.194 < 2e-16 ***
## ---
## Signif. codes:  0 '***' 0.001 '**' 0.01 '*' 0.05 '.' 0.1 ' ' 1
##
## Approximate significance of smooth terms:
##           edf Ref.df    F p-value
## s(bl_age)      1.000  1.000 232.40 <2e-16 ***
## s(bl_age):sleep_z 2.000  2.000   0.29  0.748
## s(bl_age):time  3.723  3.723 307.46 <2e-16 ***
## s(sleep_z):time 1.000  1.000   0.10  0.751
## ---
## Signif. codes:  0 '***' 0.001 '**' 0.01 '*' 0.05 '.' 0.1 ' ' 1
##
## R-sq.(adj) =  0.427
## lmer.REML = 4973.5  Scale est. = 0.011751  n = 8162

```

Below are plots of a plot of  $s(\text{bl\_age})$ ,  $s(\text{bl\_age}):\text{sleep\_z}$ ,  $s(\text{bl\_age}):\text{time}$ , and  $s(\text{sleep\_z}):\text{time}$ . For  $s(\text{sleep\_z}):\text{time}$ , roughly, if we cannot fit a straight line through the confidence bands, there is evidence that the effect of time depends on sleep duration. It is correct that the confidence interval is zero at one point along the axis; this happens because we do not include the main effect.

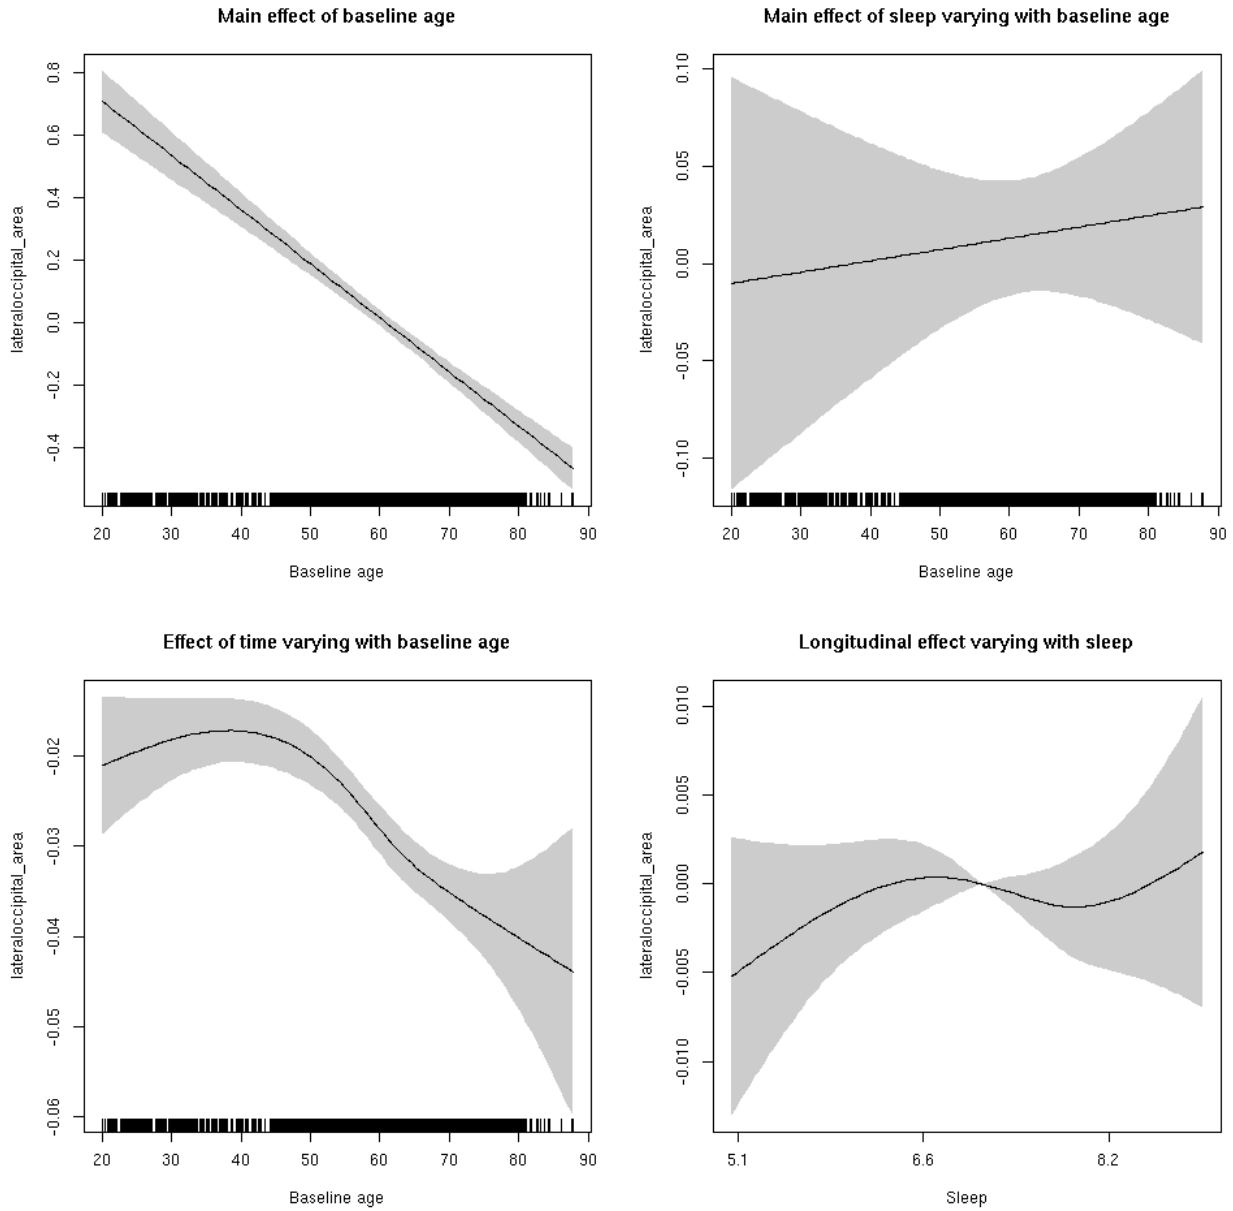

**Restricted to sleep  $\geq 5$  and  $\leq 9$  hours** Below is the row for `s(sleep_z):time` from the model output.

```
## s(sleep_z):time  2.343  2.343  0.545  0.537
```

Below are plots of a plot of `s(bl_age)`, `s(bl_age):sleep_z`, `s(bl_age):time`, and `s(sleep_z):time`. For `s(sleep_z):time`, roughly, if we cannot fit a straight line through the confidence bands, there is evidence that the effect of time depends on sleep duration. It is correct that the confidence interval is zero at one point along the axis; this happens because we do not include the main effect.

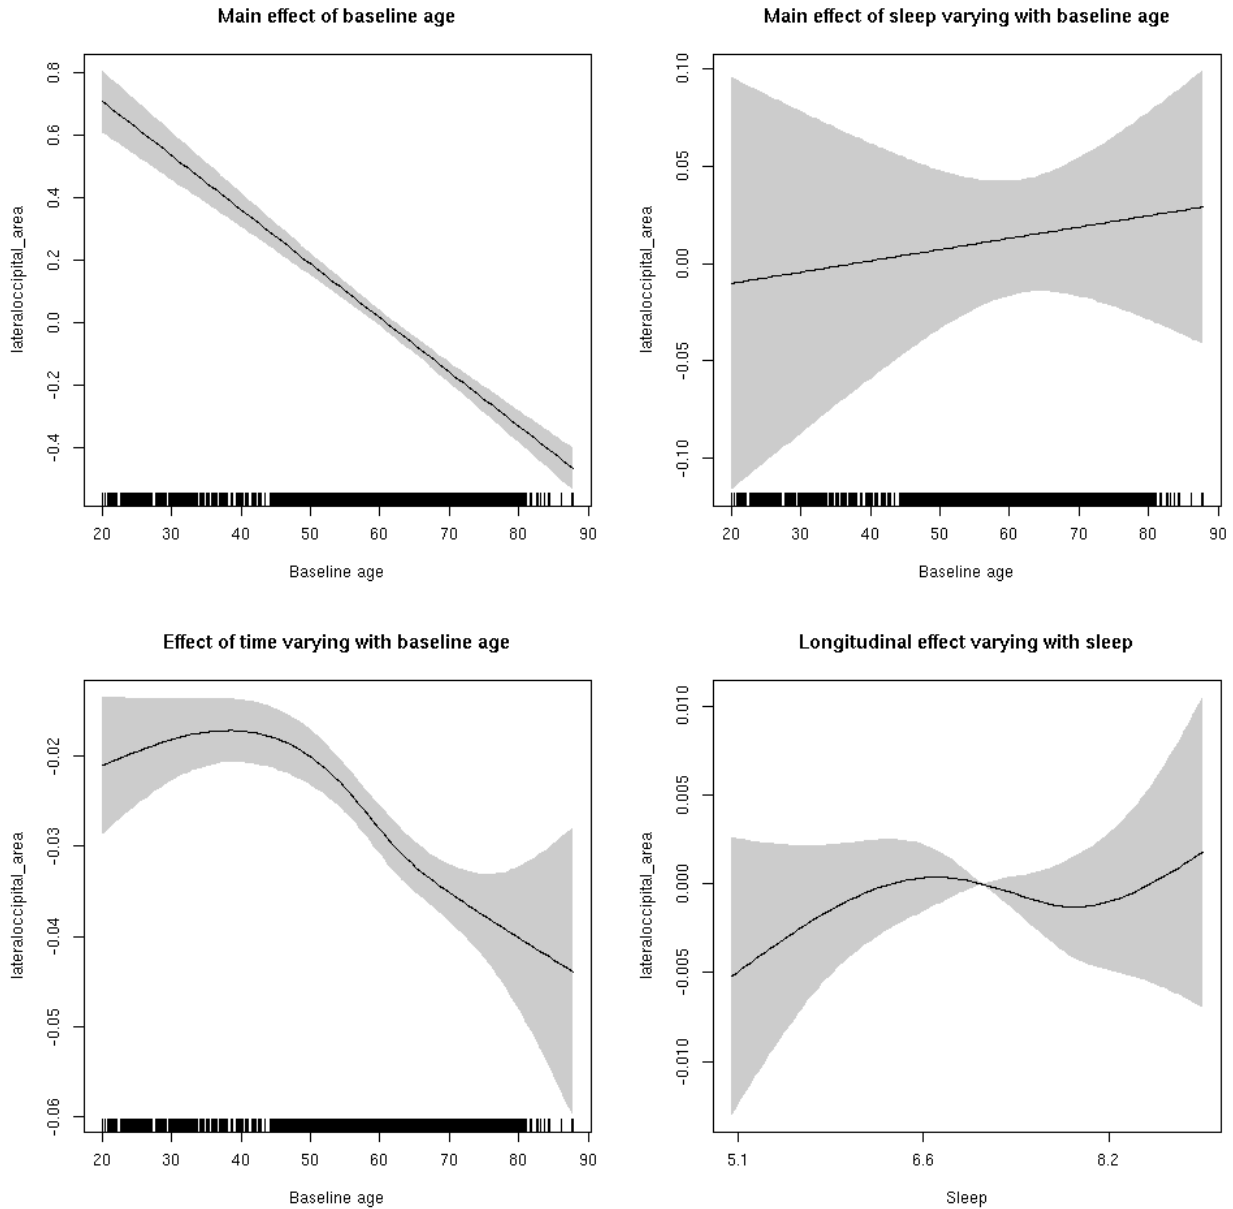

## lateraloccipital\_thickness: Stratified by sex

**Female: Full data** Below is the row for `s(sleep_z):time` from the model output.

```
## s(sleep_z):time  1.000  1.000  0.616  0.432
```

Below are plots of a plot of `s(bl_age)`, `s(bl_age):sleep_z`, `s(bl_age):time`, and `s(sleep_z):time`. For `s(sleep_z):time`, roughly, if we cannot fit a straight line through the confidence bands, there is evidence that the effect of time depends on sleep duration. It is correct that the confidence interval is zero at one point along the axis; this happens because we do not include the main effect.

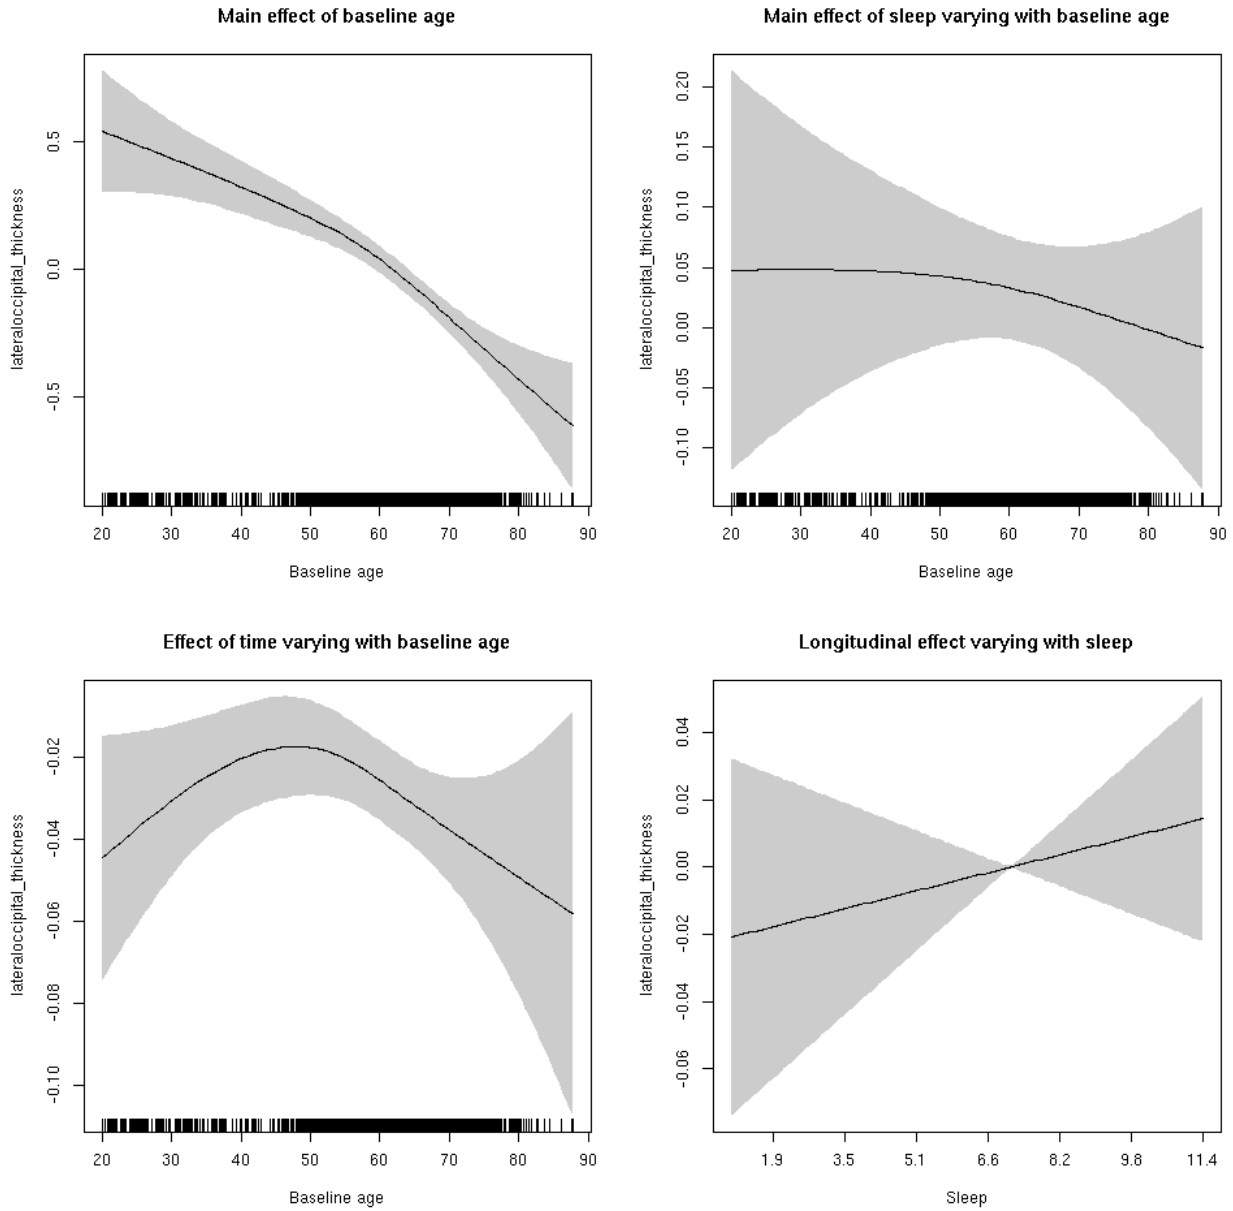

**Male: Full data** Below is the row for `s(sleep_z):time` from the model output.

```
## s(sleep_z):time  1.000  1.000  0.619  0.431
```

Below are plots of a plot of `s(bl_age)`, `s(bl_age):sleep_z`, `s(bl_age):time`, and `s(sleep_z):time`. For `s(sleep_z):time`, roughly, if we cannot fit a straight line through the confidence bands, there is evidence that the effect of time depends on sleep duration. It is correct that the confidence interval is zero at one point along the axis; this happens because we do not include the main effect.



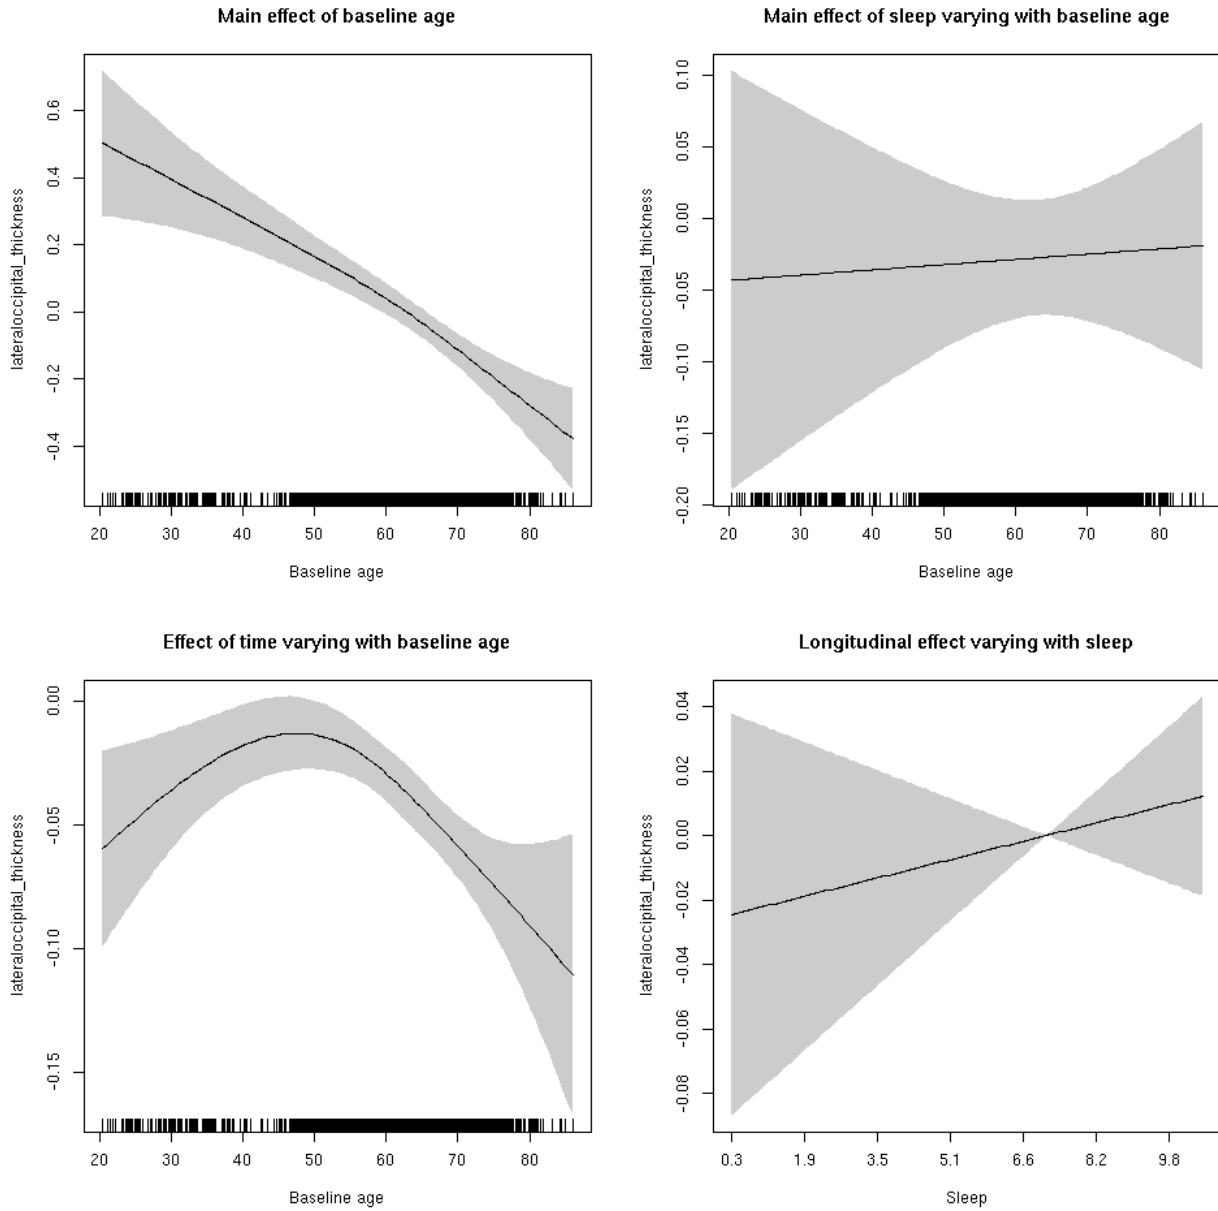

## lateraloccipital\_thickness

**Full data** Below is the model output. The term `s(sleep_z):time` is probably what we care most about.

```
##
## Family: gaussian
## Link function: identity
##
## Formula:
## value ~ sex + site + s(bl_age, k = 10, bs = "cr") + s(bl_age,
##   by = sleep_z, bs = "cr") + +s(bl_age, by = time, k = 5, bs = "cr") +
##   s(sleep_z, by = time, k = 5, bs = "cr", pc = 0)
## <environment: 0x5630035d58f0>
```

```

##
## Parametric coefficients:
##           Estimate Std. Error t value Pr(>|t|)
## (Intercept) -1.63638    0.05417 -30.210 < 2e-16 ***
## sexmale      0.14835    0.02727   5.441 5.45e-08 ***
## siteousAvanto 0.23329    0.07191   3.244 0.00118 **
## siteousPrisma 1.14877    0.28975   3.965 7.41e-05 ***
## siteousSkyra  1.05764    0.07186  14.719 < 2e-16 ***
## siteUB       0.98103    0.14450   6.789 1.21e-11 ***
## siteUCAM     0.91554    0.07451  12.287 < 2e-16 ***
## siteUKB     1.77800    0.05476  32.471 < 2e-16 ***
## siteUmU     0.26648    0.08951   2.977 0.00292 **
## ---
## Signif. codes:  0 '***' 0.001 '**' 0.01 '*' 0.05 '.' 0.1 ' ' 1
##
## Approximate significance of smooth terms:
##           edf Ref.df    F p-value
## s(bl_age)      2.747  2.747 52.092 <2e-16 ***
## s(bl_age):sleep_z 2.000  2.000  0.159  0.853
## s(bl_age):time  3.610  3.610 44.362 <2e-16 ***
## s(sleep_z):time  1.000  1.000  1.454  0.228
## ---
## Signif. codes:  0 '***' 0.001 '**' 0.01 '*' 0.05 '.' 0.1 ' ' 1
##
## R-sq.(adj) =  0.35
## lmer.REML = 16327  Scale est. = 0.14161  n = 8168

```

Below are plots of a plot of `s(bl_age)`, `s(bl_age):sleep_z`, `s(bl_age):time`, and `s(sleep_z):time`. For `s(sleep_z):time`, roughly, if we cannot fit a straight line through the confidence bands, there is evidence that the effect of time depends on sleep duration. It is correct that the confidence interval is zero at one point along the axis; this happens because we do not include the main effect.

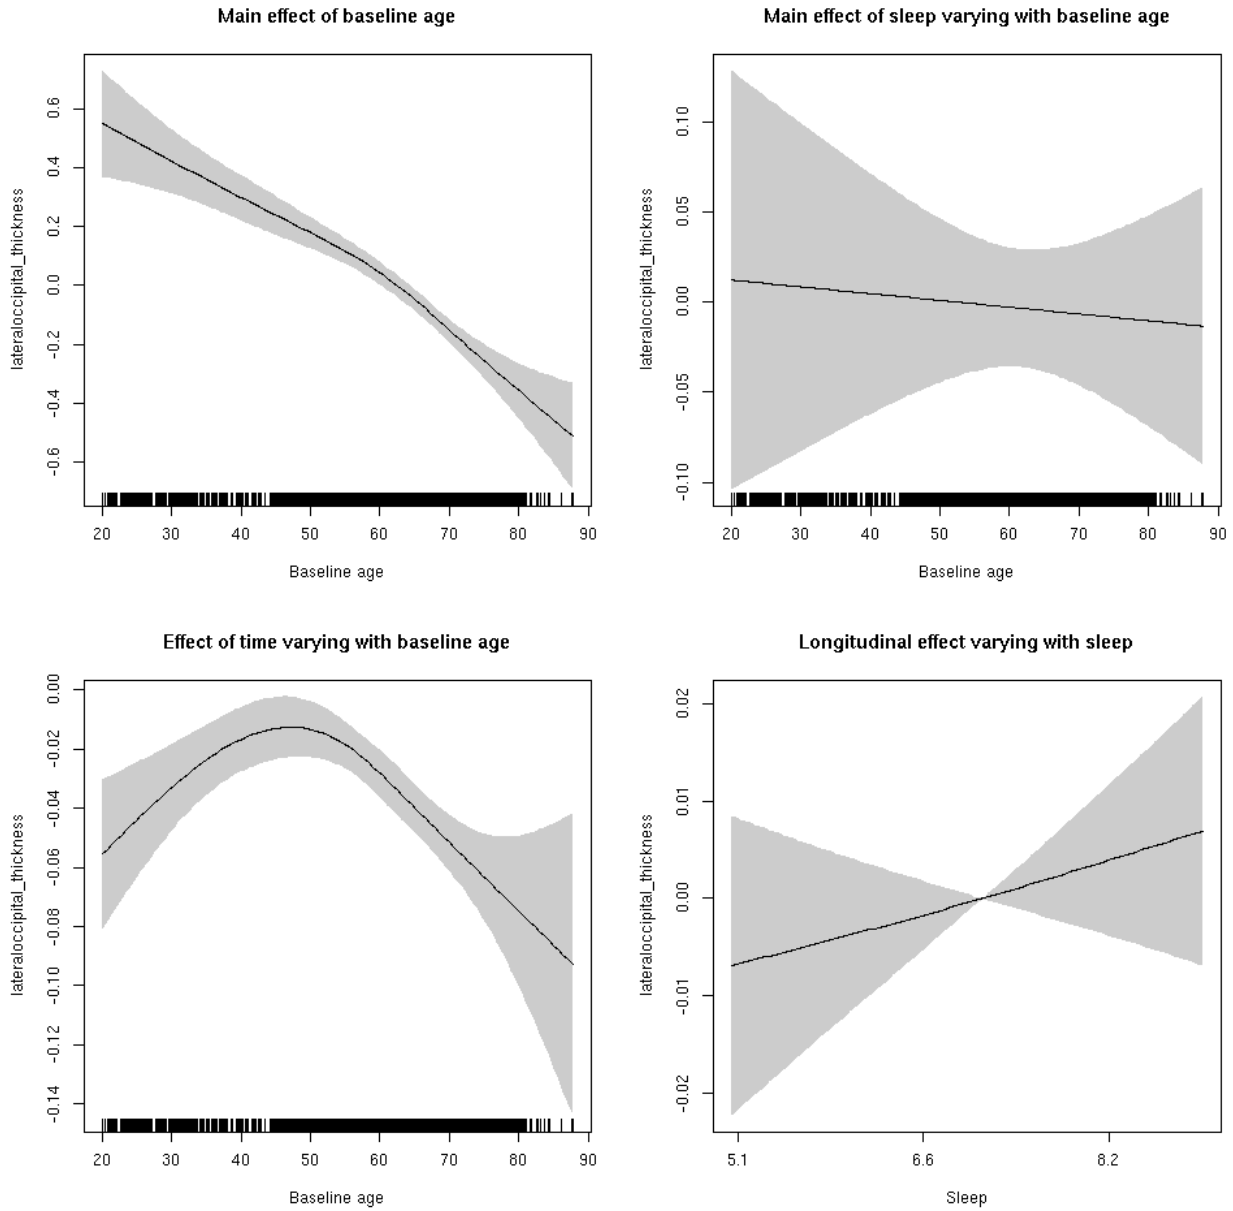

**Restricted to sleep  $\geq 5$  and  $\leq 9$  hours** Below is the row for `s(sleep_z):time` from the model output.

```
## s(sleep_z):time  1.039  1.039  0.879  0.333
```

Below are plots of a plot of `s(bl_age)`, `s(bl_age):sleep_z`, `s(bl_age):time`, and `s(sleep_z):time`. For `s(sleep_z):time`, roughly, if we cannot fit a straight line through the confidence bands, there is evidence that the effect of time depends on sleep duration. It is correct that the confidence interval is zero at one point along the axis; this happens because we do not include the main effect.

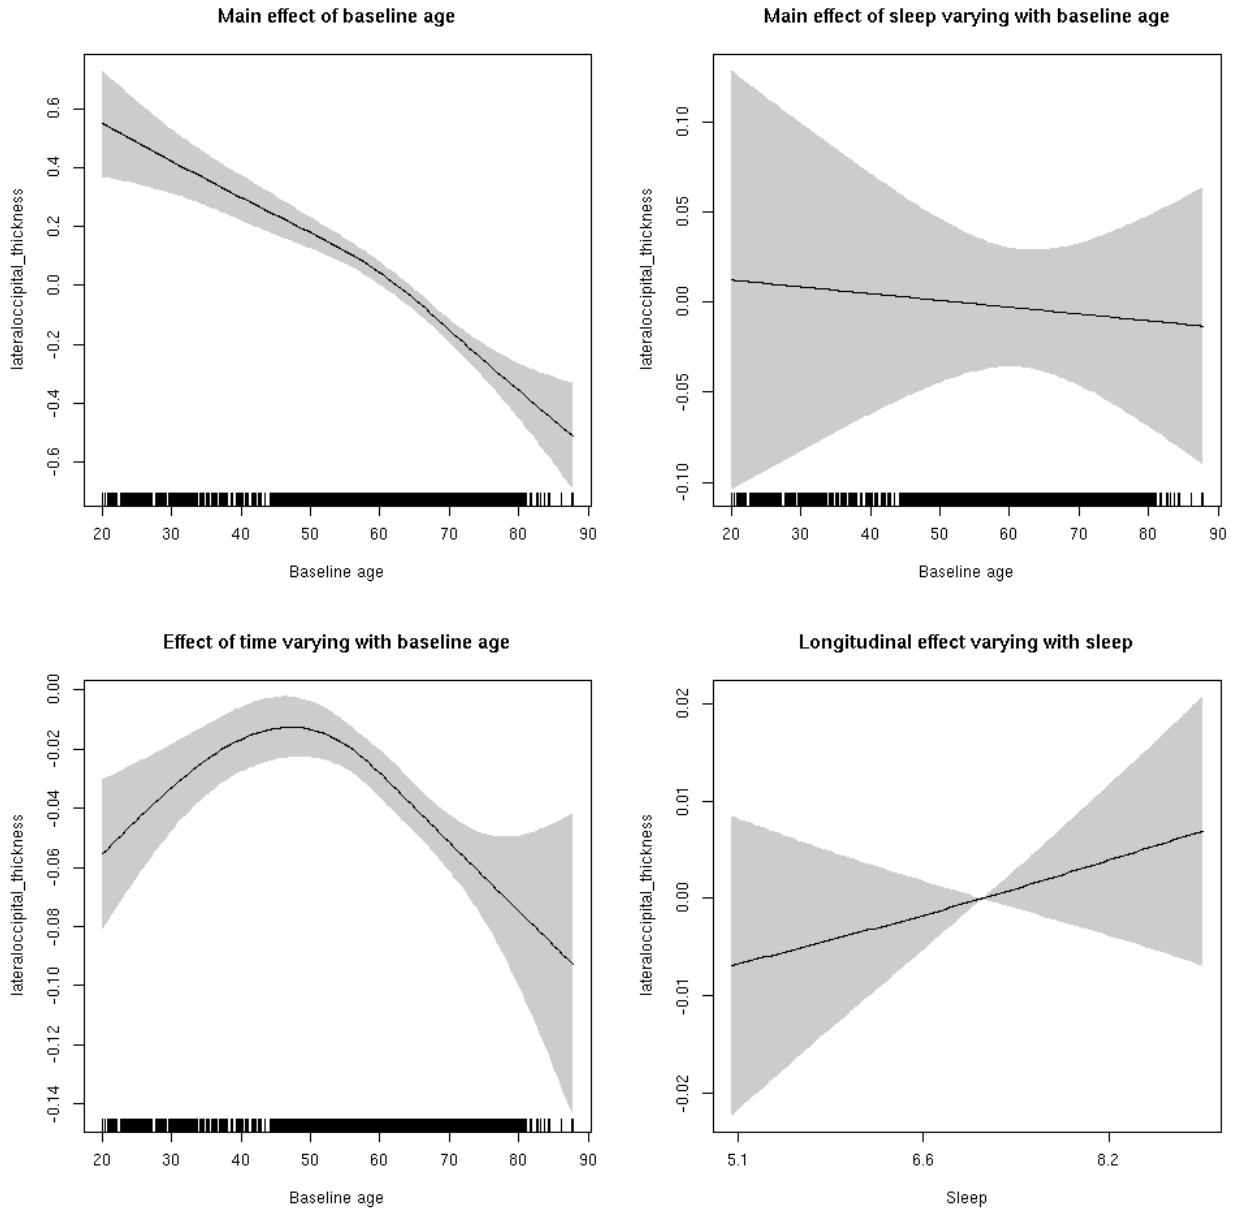

## lateraloccipital\_volume: Stratified by sex

**Female: Full data** Below is the row for `s(sleep_z):time` from the model output.

```
## s(sleep_z):time  1.000  1.000  0.055  0.814
```

Below are plots of a plot of `s(bl_age)`, `s(bl_age):sleep_z`, `s(bl_age):time`, and `s(sleep_z):time`. For `s(sleep_z):time`, roughly, if we cannot fit a straight line through the confidence bands, there is evidence that the effect of time depends on sleep duration. It is correct that the confidence interval is zero at one point along the axis; this happens because we do not include the main effect.

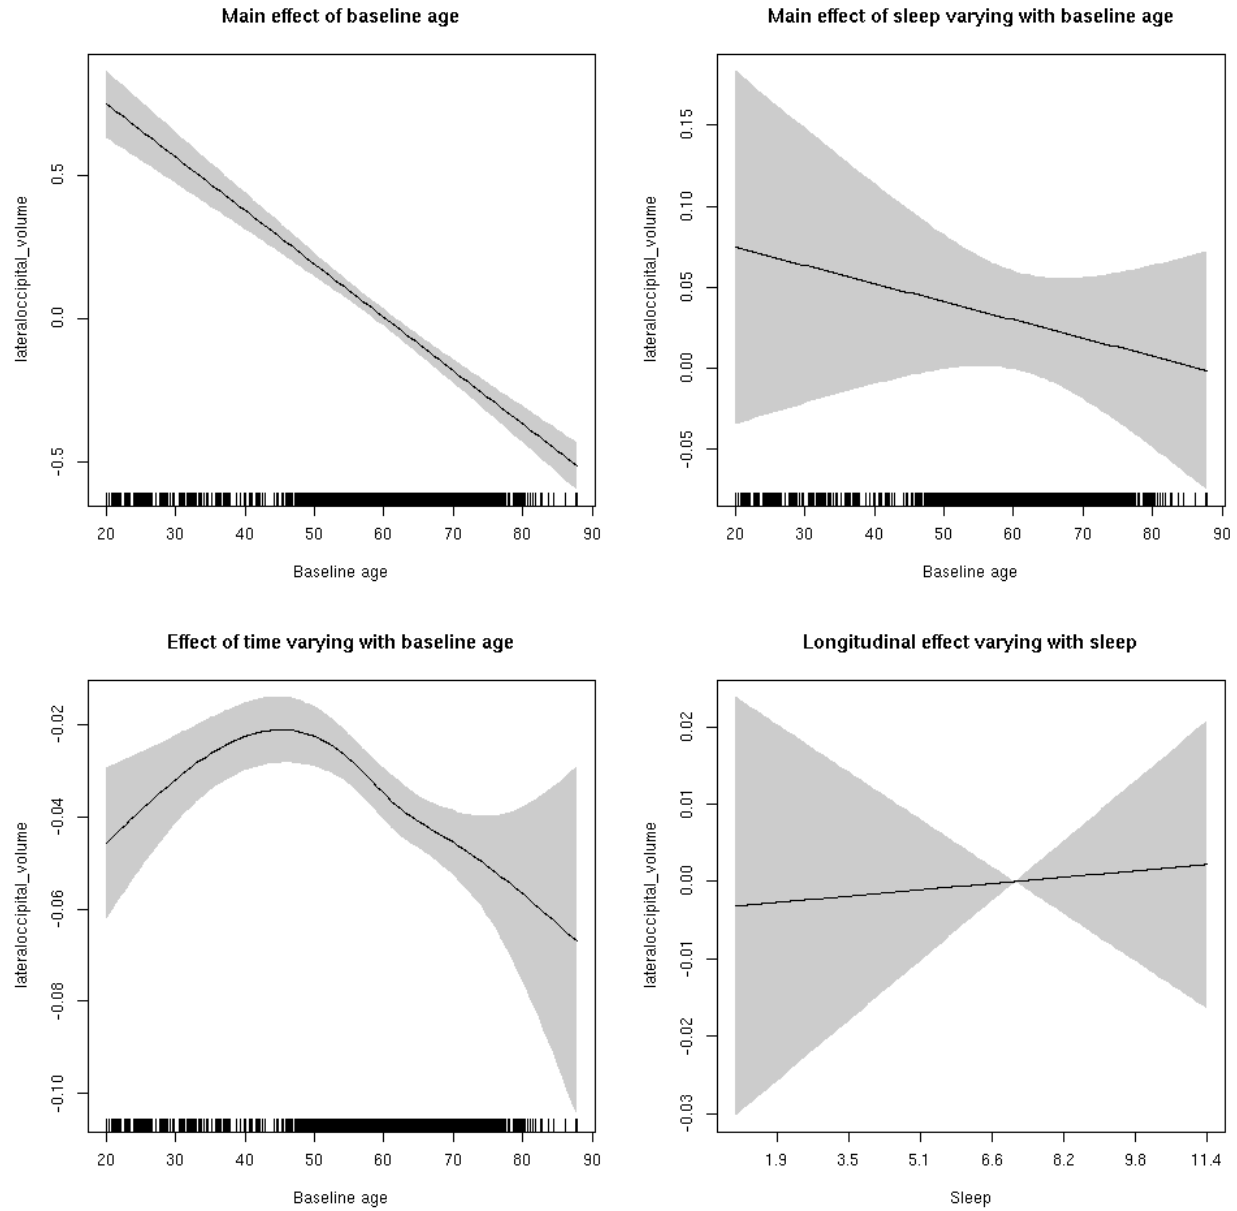

**Male: Full data** Below is the row for `s(sleep_z):time` from the model output.

```
## s(sleep_z):time 1.000 1.000 0.210 0.647
```

Below are plots of a plot of `s(bl_age)`, `s(bl_age):sleep_z`, `s(bl_age):time`, and `s(sleep_z):time`. For `s(sleep_z):time`, roughly, if we cannot fit a straight line through the confidence bands, there is evidence that the effect of time depends on sleep duration. It is correct that the confidence interval is zero at one point along the axis; this happens because we do not include the main effect.

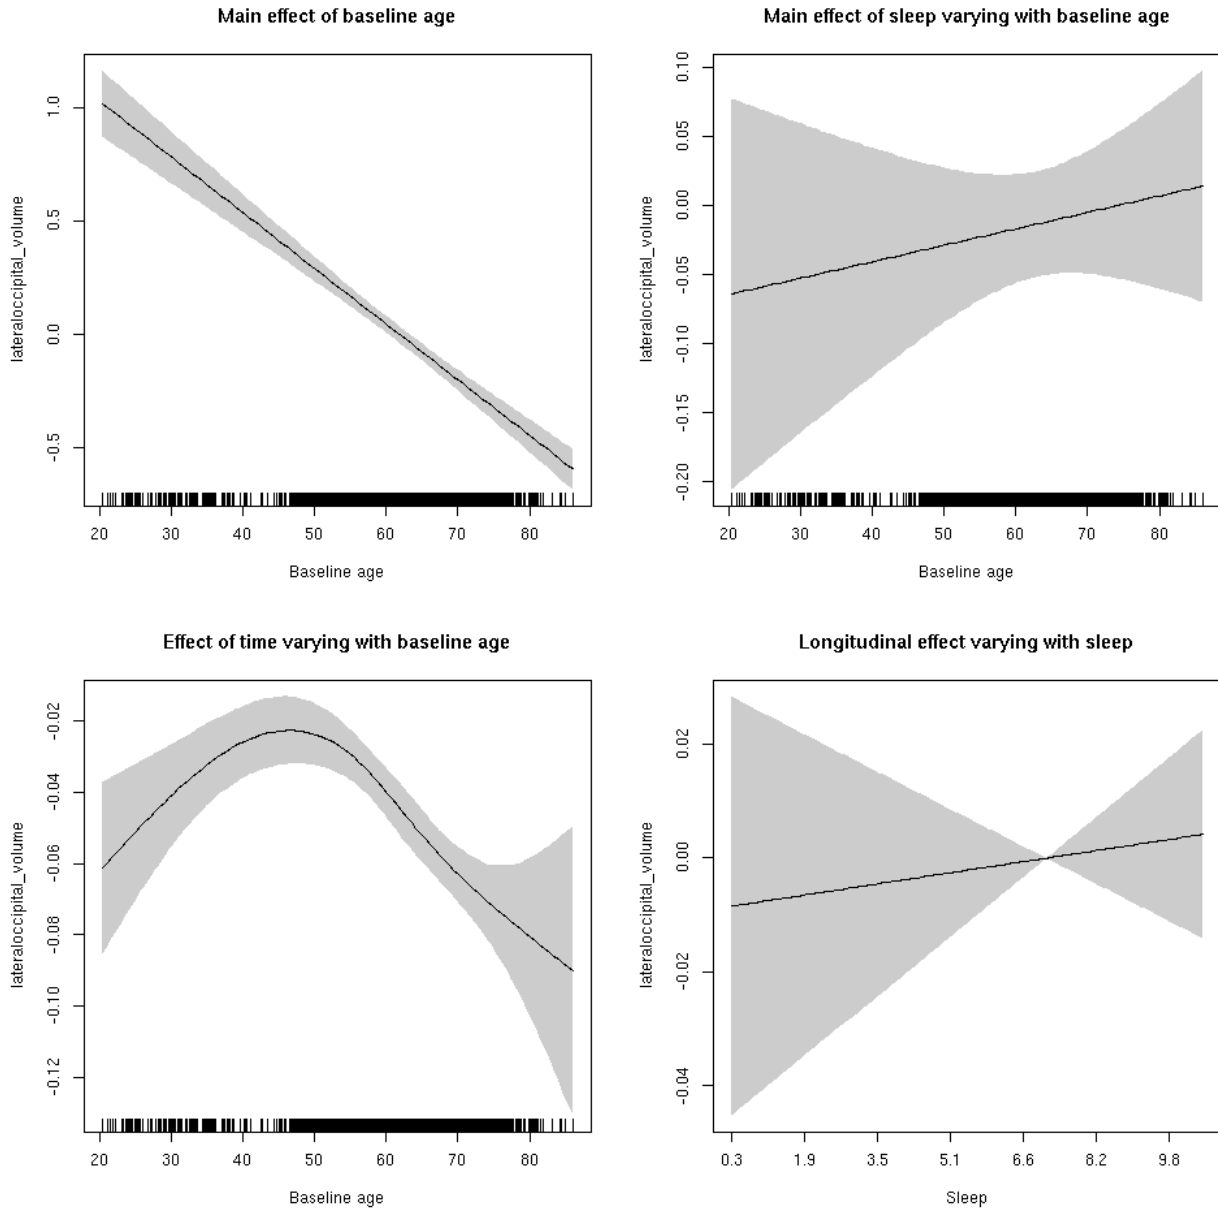

## lateraloccipital\_volume

**Full data** Below is the model output. The term `s(sleep_z):time` is probably what we care most about.

```
##
## Family: gaussian
## Link function: identity
##
## Formula:
## value ~ sex + site + icv + s(bl_age, k = 10, bs = "cr") + s(bl_age,
##   by = sleep_z, bs = "cr") + +s(bl_age, by = time, k = 5, bs = "cr") +
##   s(sleep_z, by = time, k = 5, bs = "cr", pc = 0)
## <environment: 0x5630035b3ed8>
```

```

##
## Parametric coefficients:
##           Estimate Std. Error t value Pr(>|t|)
## (Intercept) -0.37705    0.05468  -6.896 5.76e-12 ***
## sexmale      0.44856    0.02839  15.799 < 2e-16 ***
## siteousAvanto -0.36565    0.06752  -5.416 6.29e-08 ***
## siteousPrisma -0.06669    0.17142  -0.389 0.69725
## siteousSkyra  0.58654    0.06530   8.982 < 2e-16 ***
## siteUB       -0.16388    0.12691  -1.291 0.19663
## siteUCAM      0.06757    0.06803   0.993 0.32061
## siteUKB       0.29244    0.05094   5.741 9.72e-09 ***
## siteUmU       0.22352    0.07845   2.849 0.00439 **
## icv           0.44478    0.01399  31.790 < 2e-16 ***
## ---
## Signif. codes:  0 '***' 0.001 '**' 0.01 '*' 0.05 '.' 0.1 ' ' 1
##
## Approximate significance of smooth terms:
##           edf Ref.df      F p-value
## s(bl_age)      1.000  1.000 384.425 <2e-16 ***
## s(bl_age):sleep_z 2.000  2.000   0.151  0.859
## s(bl_age):time  4.003  4.003 169.333 <2e-16 ***
## s(sleep_z):time  1.000  1.000   0.284  0.594
## ---
## Signif. codes:  0 '***' 0.001 '**' 0.01 '*' 0.05 '.' 0.1 ' ' 1
##
## R-sq.(adj) =  0.477
## lmer.REML = 10027  Scale est. = 0.042103  n = 8174

```

Below are plots of a plot of  $s(\text{bl\_age})$ ,  $s(\text{bl\_age}):\text{sleep\_z}$ ,  $s(\text{bl\_age}):\text{time}$ , and  $s(\text{sleep\_z}):\text{time}$ . For  $s(\text{sleep\_z}):\text{time}$ , roughly, if we cannot fit a straight line through the confidence bands, there is evidence that the effect of time depends on sleep duration. It is correct that the confidence interval is zero at one point along the axis; this happens because we do not include the main effect.

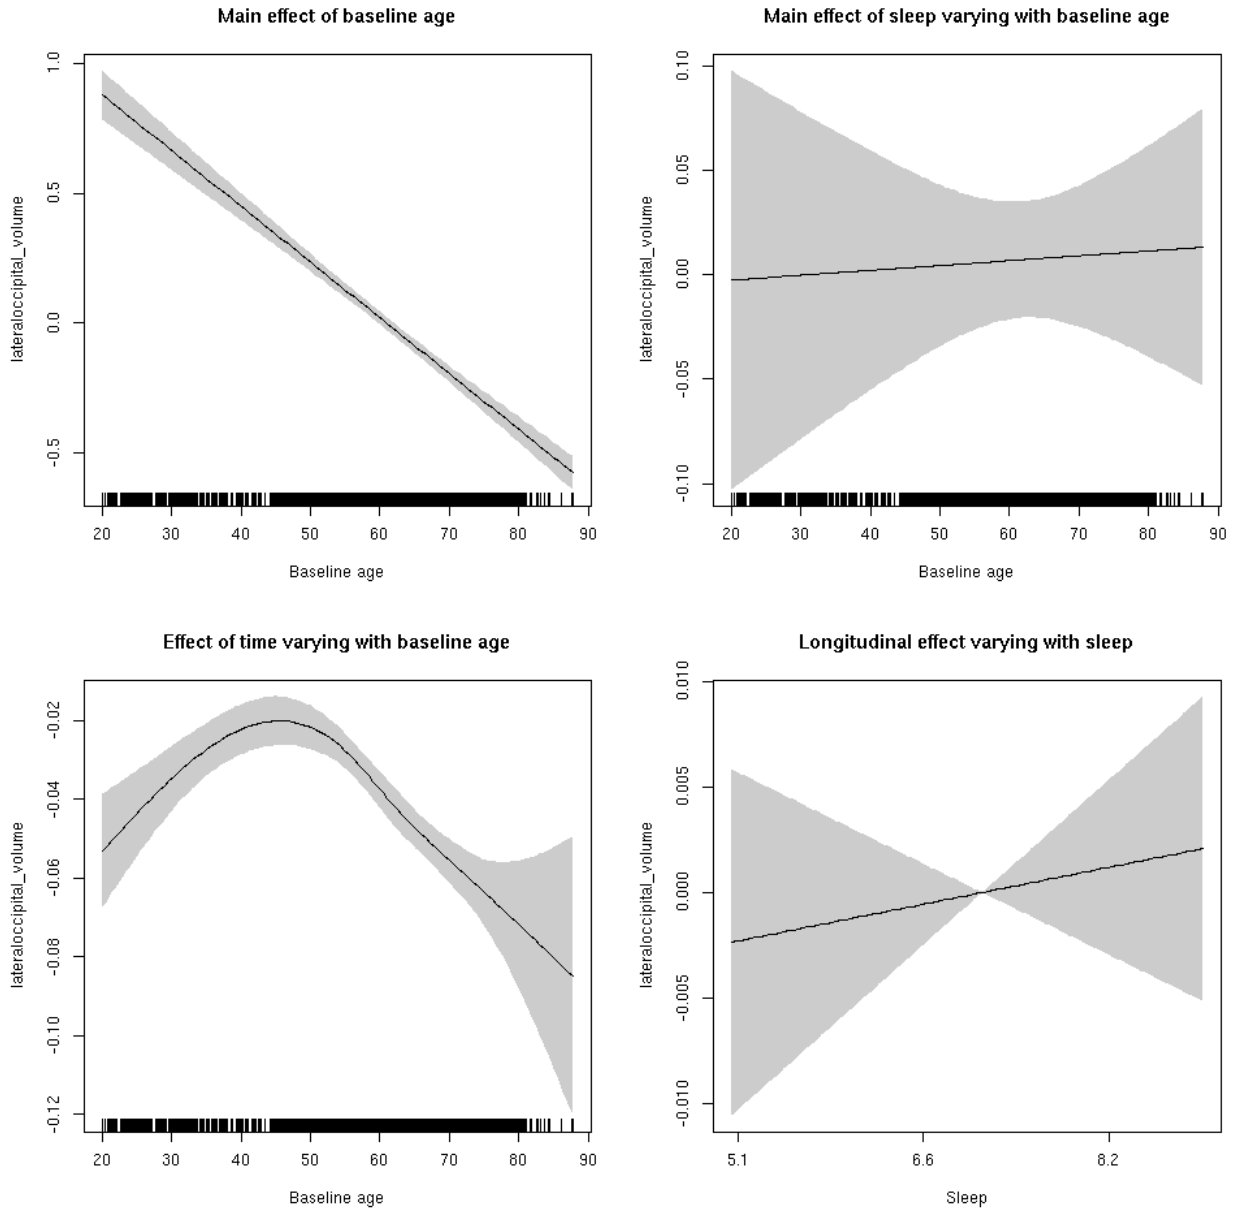

**Restricted to sleep  $\geq 5$  and  $\leq 9$  hours** Below is the row for `s(sleep_z):time` from the model output.

```
## s(sleep_z):time 1.00 1.00 0.332 0.565
```

Below are plots of a plot of `s(bl_age)`, `s(bl_age):sleep_z`, `s(bl_age):time`, and `s(sleep_z):time`. For `s(sleep_z):time`, roughly, if we cannot fit a straight line through the confidence bands, there is evidence that the effect of time depends on sleep duration. It is correct that the confidence interval is zero at one point along the axis; this happens because we do not include the main effect.





## lateralorbitofrontal\_area: Stratified by sex

**Female: Full data** Below is the row for `s(sleep_z):time` from the model output.

```
## s(sleep_z):time  1.000  1.000  1.059  0.303
```

Below are plots of a plot of `s(bl_age)`, `s(bl_age):sleep_z`, `s(bl_age):time`, and `s(sleep_z):time`. For `s(sleep_z):time`, roughly, if we cannot fit a straight line through the confidence bands, there is evidence that the effect of time depends on sleep duration. It is correct that the confidence interval is zero at one point along the axis; this happens because we do not include the main effect.

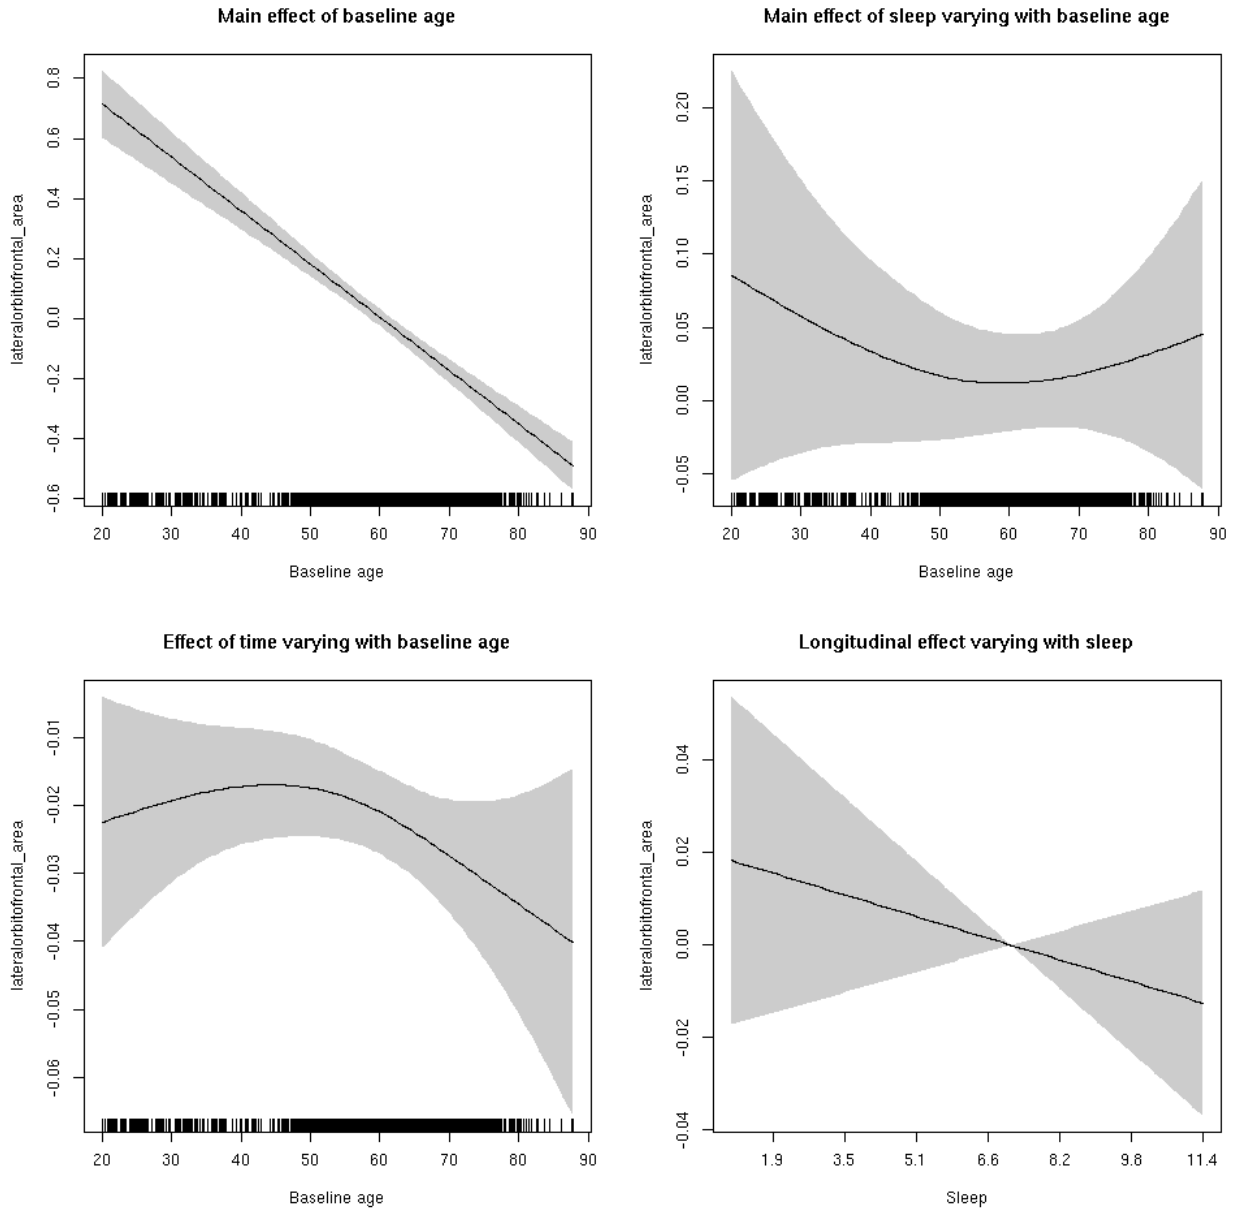

**Male: Full data** Below is the row for `s(sleep_z):time` from the model output.

```
## s(sleep_z):time  1.000  1.000  0.017  0.8967
```

Below are plots of a plot of `s(bl_age)`, `s(bl_age):sleep_z`, `s(bl_age):time`, and `s(sleep_z):time`. For `s(sleep_z):time`, roughly, if we cannot fit a straight line through the confidence bands, there is evidence that the effect of time depends on sleep duration. It is correct that the confidence interval is zero at one point along the axis; this happens because we do not include the main effect.

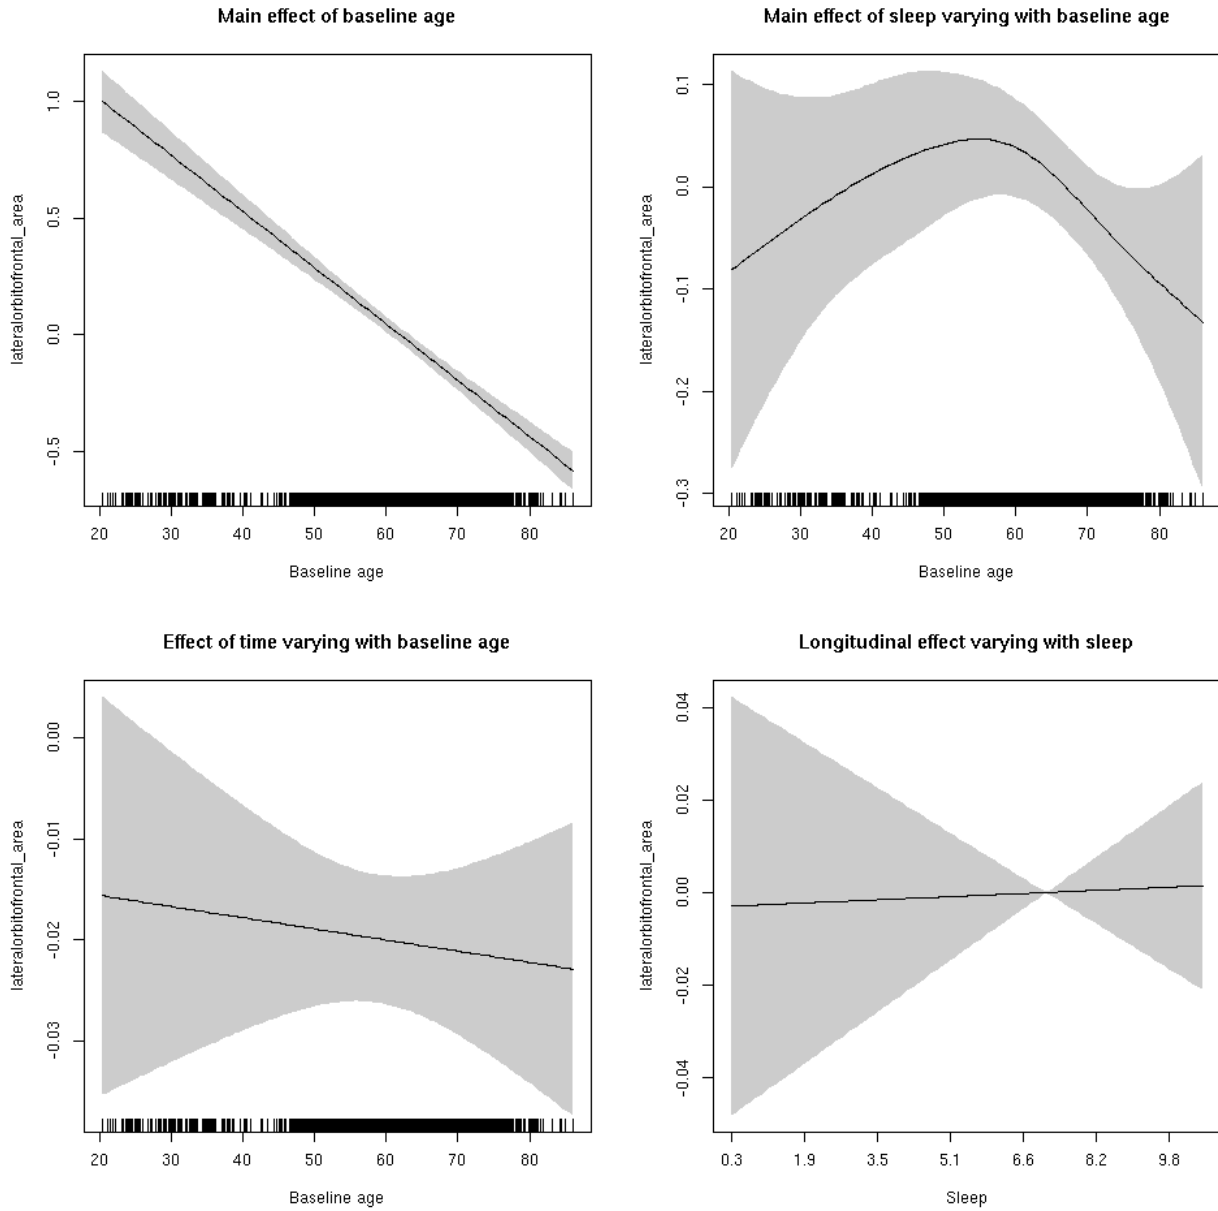

## lateralorbitofrontal\_area

**Full data** Below is the model output. The term `s(sleep_z):time` is probably what we care most about.

```
##
## Family: gaussian
## Link function: identity
##
## Formula:
## value ~ sex + site + icv + s(bl_age, k = 10, bs = "cr") + s(bl_age,
##   by = sleep_z, bs = "cr") + +s(bl_age, by = time, k = 5, bs = "cr") +
##   s(sleep_z, by = time, k = 5, bs = "cr", pc = 0)
## <environment: 0x5630035adbc8>
```

```

##
## Parametric coefficients:
##           Estimate Std. Error t value Pr(>|t|)
## (Intercept)  0.38950   0.05062   7.694 1.59e-14 ***
## sexmale      0.17683   0.02628   6.729 1.82e-11 ***
## siteousAvanto -0.24545   0.06297  -3.898 9.79e-05 ***
## siteousPrisma -1.26703   0.20825  -6.084 1.22e-09 ***
## siteousSkyra  0.10129   0.06086   1.664  0.0961 .
## siteUB       -0.67842   0.11664  -5.816 6.24e-09 ***
## siteUCAM     -0.60107   0.06288  -9.559 < 2e-16 ***
## siteUKB      -0.43469   0.04710  -9.228 < 2e-16 ***
## siteUmU      0.51990   0.07249   7.172 8.01e-13 ***
## icv          0.63664   0.01300  48.961 < 2e-16 ***
## ---
## Signif. codes:  0 '***' 0.001 '**' 0.01 '*' 0.05 '.' 0.1 ' ' 1
##
## Approximate significance of smooth terms:
##           edf Ref.df      F p-value
## s(bl_age)      1.000  1.000 422.772 <2e-16 ***
## s(bl_age):sleep_z 2.000  2.000   0.838  0.433
## s(bl_age):time  2.849  2.849  35.880 <2e-16 ***
## s(sleep_z):time  1.000  1.000   0.280  0.597
## ---
## Signif. codes:  0 '***' 0.001 '**' 0.01 '*' 0.05 '.' 0.1 ' ' 1
##
## R-sq.(adj) =  0.563
## lmer.REML = 11512 Scale est. = 0.069118 n = 8171

```

Below are plots of a plot of  $s(\text{bl\_age})$ ,  $s(\text{bl\_age}):\text{sleep\_z}$ ,  $s(\text{bl\_age}):\text{time}$ , and  $s(\text{sleep\_z}):\text{time}$ . For  $s(\text{sleep\_z}):\text{time}$ , roughly, if we cannot fit a straight line through the confidence bands, there is evidence that the effect of time depends on sleep duration. It is correct that the confidence interval is zero at one point along the axis; this happens because we do not include the main effect.

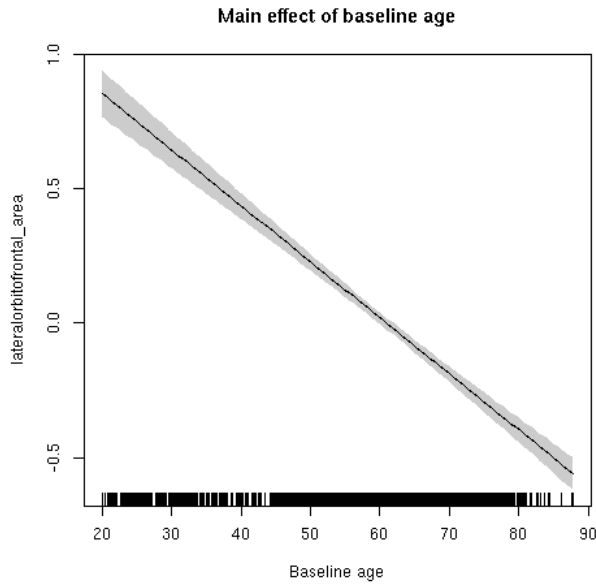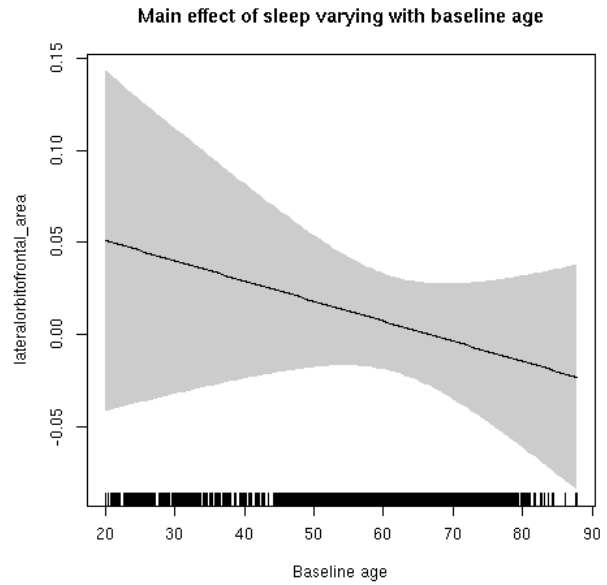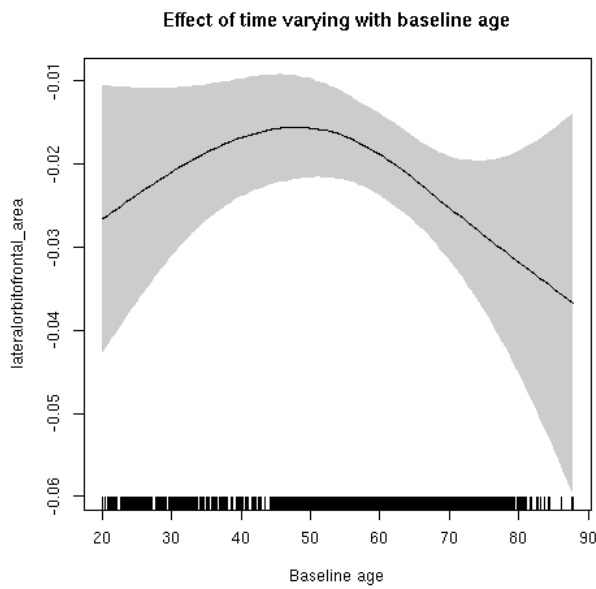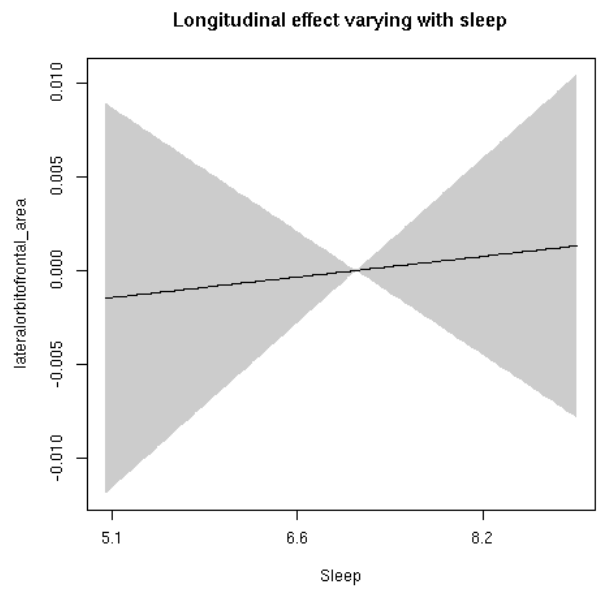

**Restricted to sleep  $\geq 5$  and  $\leq 9$  hours** Below is the row for `s(sleep_z):time` from the model output.

```
## s(sleep_z):time 1.000 1.000 0.082 0.775
```

Below are plots of a plot of `s(bl_age)`, `s(bl_age):sleep_z`, `s(bl_age):time`, and `s(sleep_z):time`. For `s(sleep_z):time`, roughly, if we cannot fit a straight line through the confidence bands, there is evidence that the effect of time depends on sleep duration. It is correct that the confidence interval is zero at one point along the axis; this happens because we do not include the main effect.

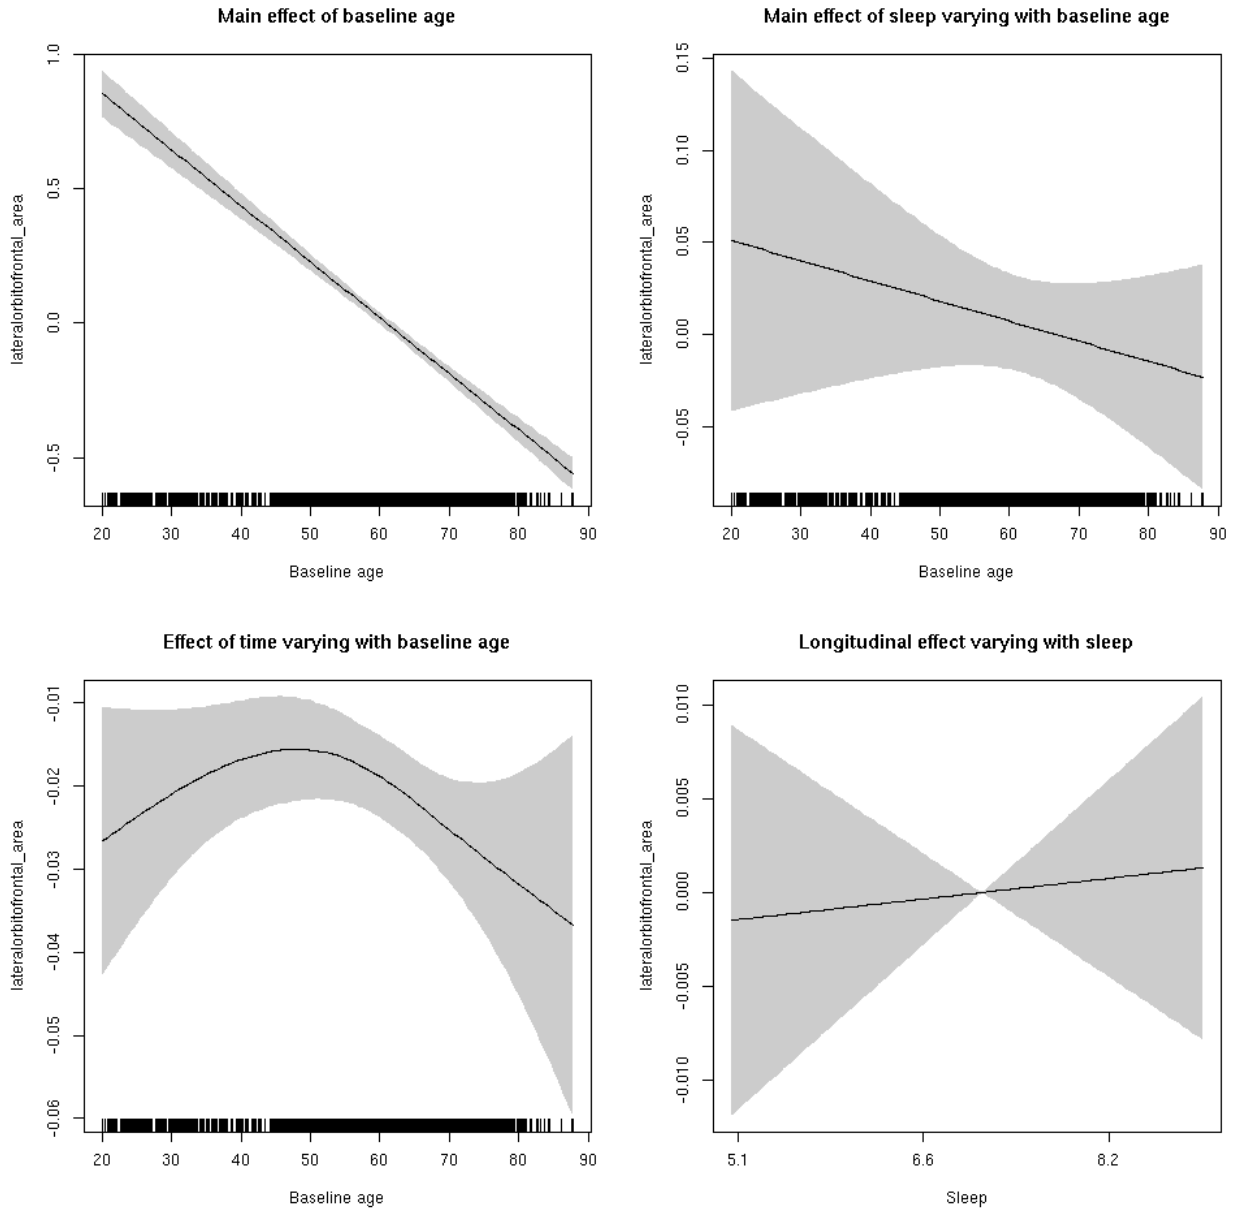

## lateralorbitofrontal\_thickness: Stratified by sex

**Female: Full data** Below is the row for `s(sleep_z):time` from the model output.

```
## s(sleep_z):time  1.000  1.000  1.377  0.241
```

Below are plots of a plot of `s(bl_age)`, `s(bl_age):sleep_z`, `s(bl_age):time`, and `s(sleep_z):time`. For `s(sleep_z):time`, roughly, if we cannot fit a straight line through the confidence bands, there is evidence that the effect of time depends on sleep duration. It is correct that the confidence interval is zero at one point along the axis; this happens because we do not include the main effect.

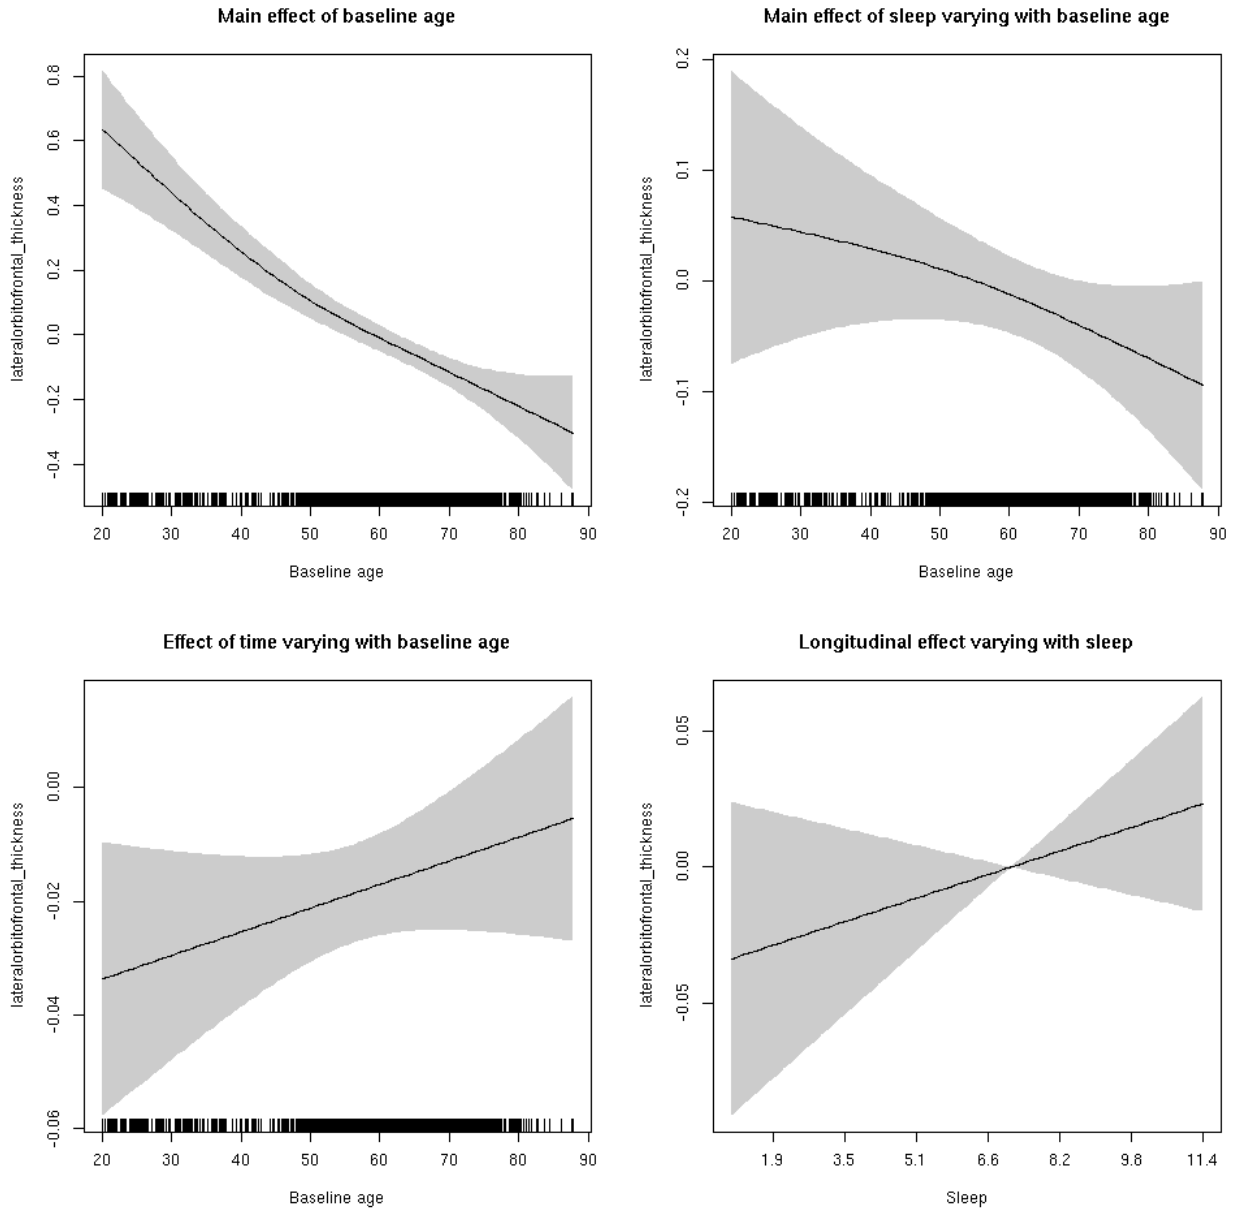

**Male: Full data** Below is the row for `s(sleep_z):time` from the model output.

```
## s(sleep_z):time  1.00  1.00  0.621  0.431
```

Below are plots of a plot of `s(bl_age)`, `s(bl_age):sleep_z`, `s(bl_age):time`, and `s(sleep_z):time`. For `s(sleep_z):time`, roughly, if we cannot fit a straight line through the confidence bands, there is evidence that the effect of time depends on sleep duration. It is correct that the confidence interval is zero at one point along the axis; this happens because we do not include the main effect.

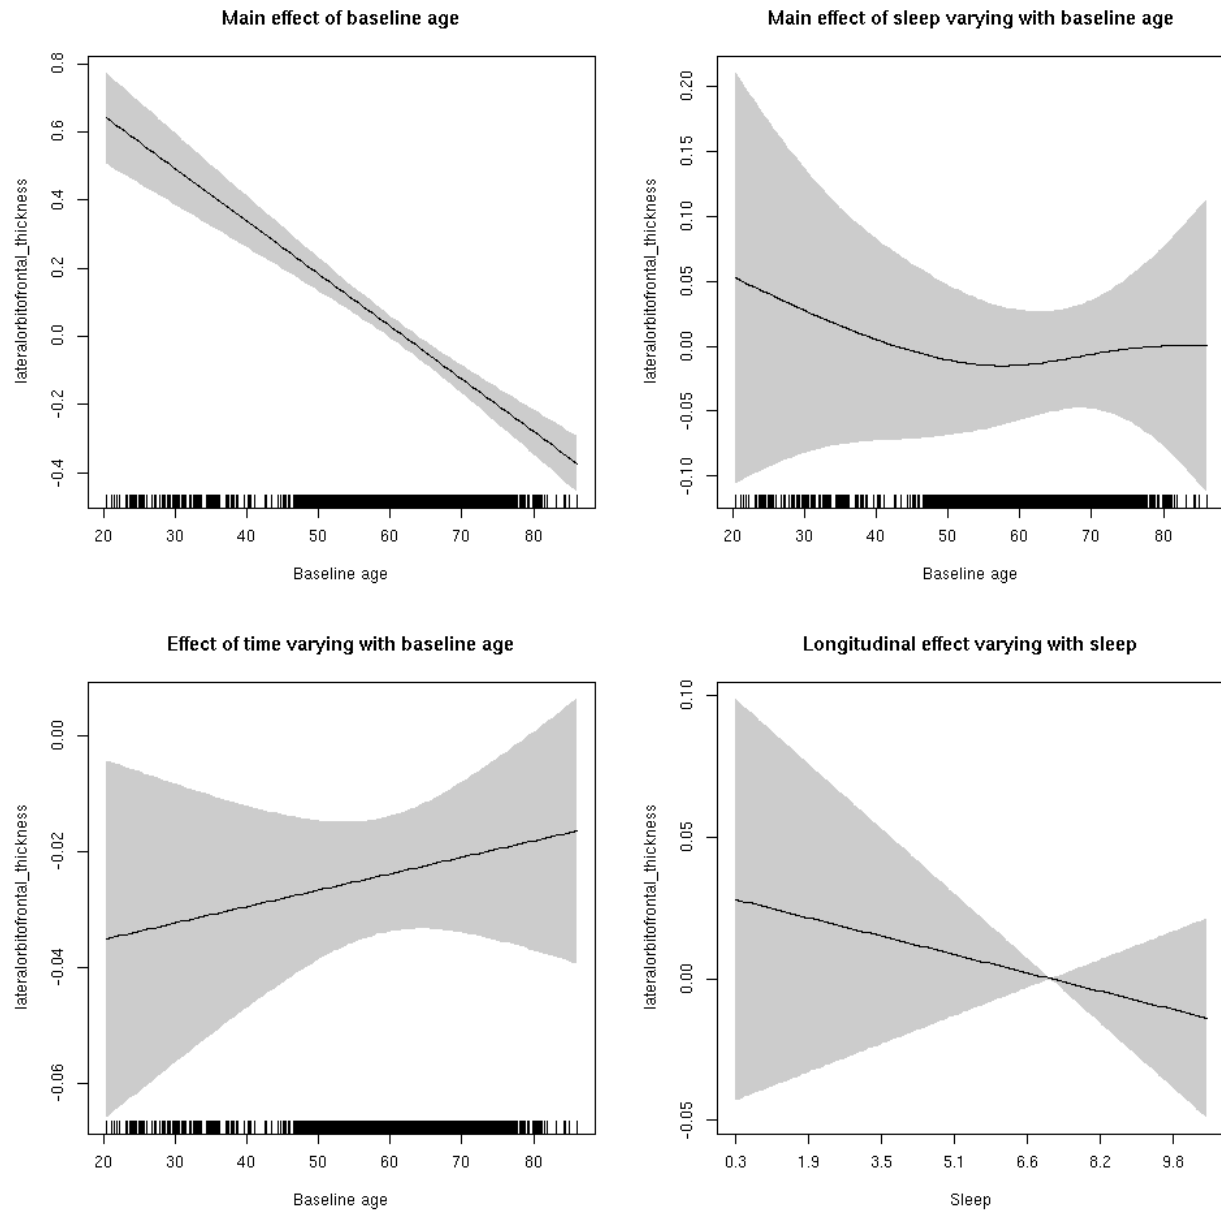

## lateralorbitofrontal\_thickness

**Full data** Below is the model output. The term `s(sleep_z):time` is probably what we care most about.

```
##
## Family: gaussian
## Link function: identity
##
## Formula:
## value ~ sex + site + s(bl_age, k = 10, bs = "cr") + s(bl_age,
##   by = sleep_z, bs = "cr") + +s(bl_age, by = time, k = 5, bs = "cr") +
##   s(sleep_z, by = time, k = 5, bs = "cr", pc = 0)
## <environment: 0x5630035ce460>
```



```

##
## Parametric coefficients:
##           Estimate Std. Error t value Pr(>|t|)
## (Intercept) -1.84291    0.04369 -42.181 < 2e-16 ***
## sexmale      0.04122    0.02240   1.841  0.0657 .
## siteousAvanto 0.12068    0.06025   2.003  0.0452 *
## siteousPrisma 0.41598    0.31554   1.318  0.1874
## siteousSkyra -0.09053    0.06008  -1.507  0.1319
## siteUB       0.61575    0.11713   5.257 1.50e-07 ***
## siteUCAM     0.47117    0.06069   7.763 9.27e-15 ***
## siteUKB      2.10444    0.04329  48.617 < 2e-16 ***
## siteUmU     -0.29050    0.07322  -3.967 7.33e-05 ***
## ---
## Signif. codes:  0 '***' 0.001 '**' 0.01 '*' 0.05 '.' 0.1 ' ' 1
##
## Approximate significance of smooth terms:
##           edf Ref.df      F p-value
## s(bl_age)      1.056  1.056 160.363 <2e-16 ***
## s(bl_age):sleep_z 2.000  2.000   2.081  0.125
## s(bl_age):time  2.000  2.000  22.649 <2e-16 ***
## s(sleep_z):time 1.000  1.000   0.076  0.783
## ---
## Signif. codes:  0 '***' 0.001 '**' 0.01 '*' 0.05 '.' 0.1 ' ' 1
##
## R-sq.(adj) =  0.599
## lmer.REML = 15905  Scale est. = 0.18352  n = 8172

```

Below are plots of a plot of `s(bl_age)`, `s(bl_age):sleep_z`, `s(bl_age):time`, and `s(sleep_z):time`. For `s(sleep_z):time`, roughly, if we cannot fit a straight line through the confidence bands, there is evidence that the effect of time depends on sleep duration. It is correct that the confidence interval is zero at one point along the axis; this happens because we do not include the main effect.

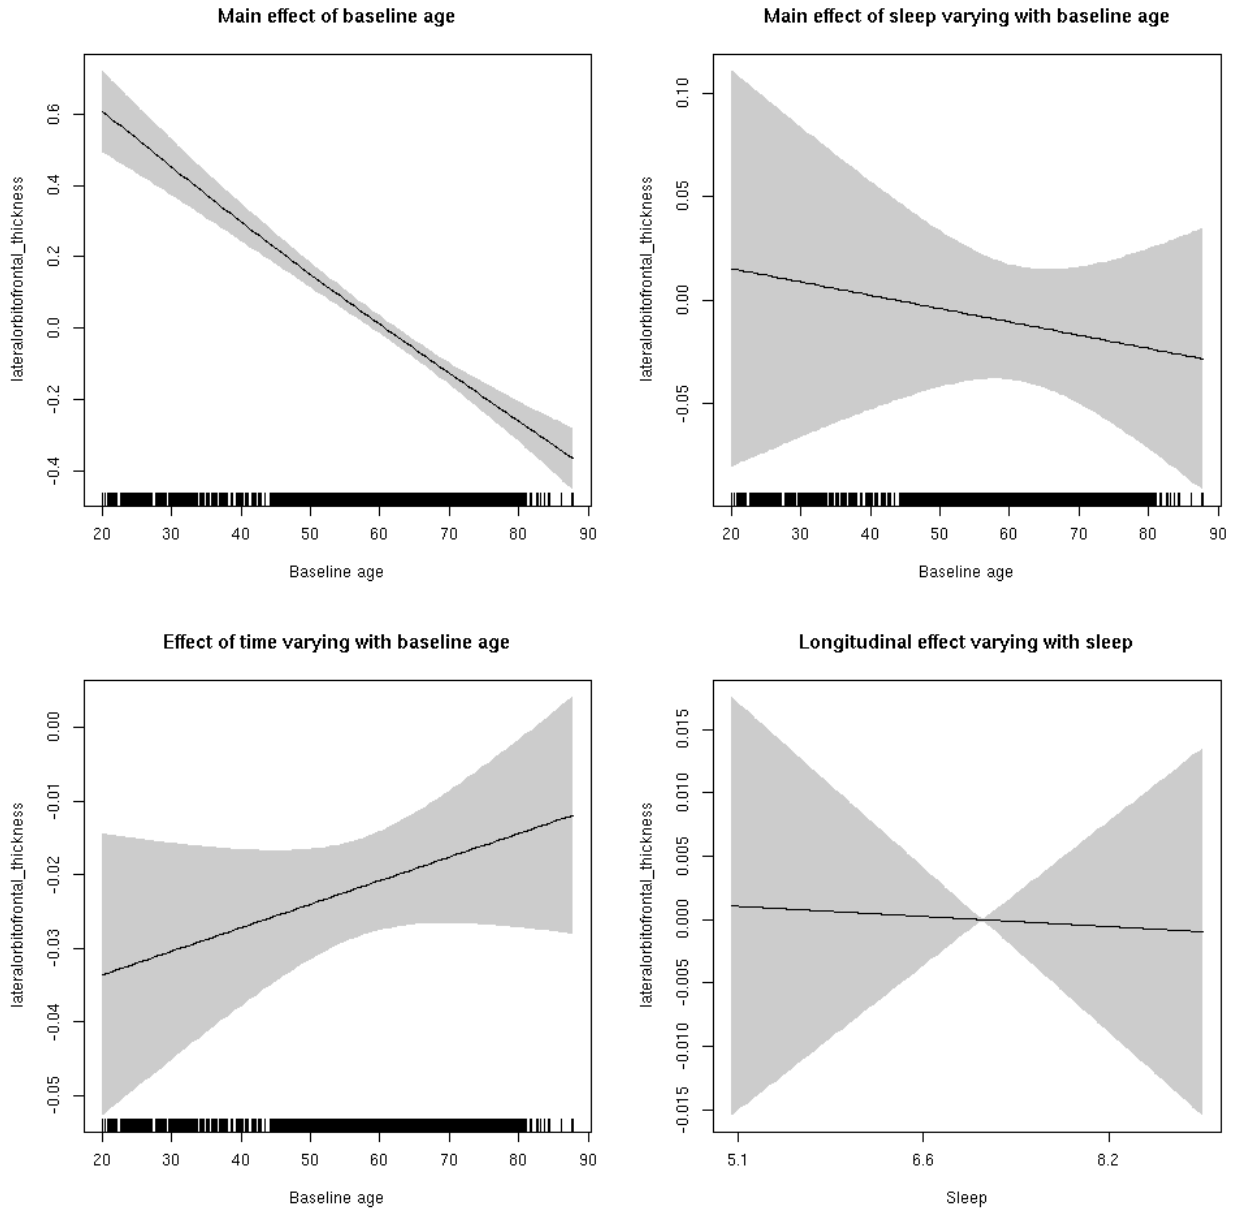

**Restricted to sleep  $\geq 5$  and  $\leq 9$  hours** Below is the row for `s(sleep_z):time` from the model output.

```
## s(sleep_z):time 1.000 1.000 0.017 0.897
```

Below are plots of a plot of `s(bl_age)`, `s(bl_age):sleep_z`, `s(bl_age):time`, and `s(sleep_z):time`. For `s(sleep_z):time`, roughly, if we cannot fit a straight line through the confidence bands, there is evidence that the effect of time depends on sleep duration. It is correct that the confidence interval is zero at one point along the axis; this happens because we do not include the main effect.

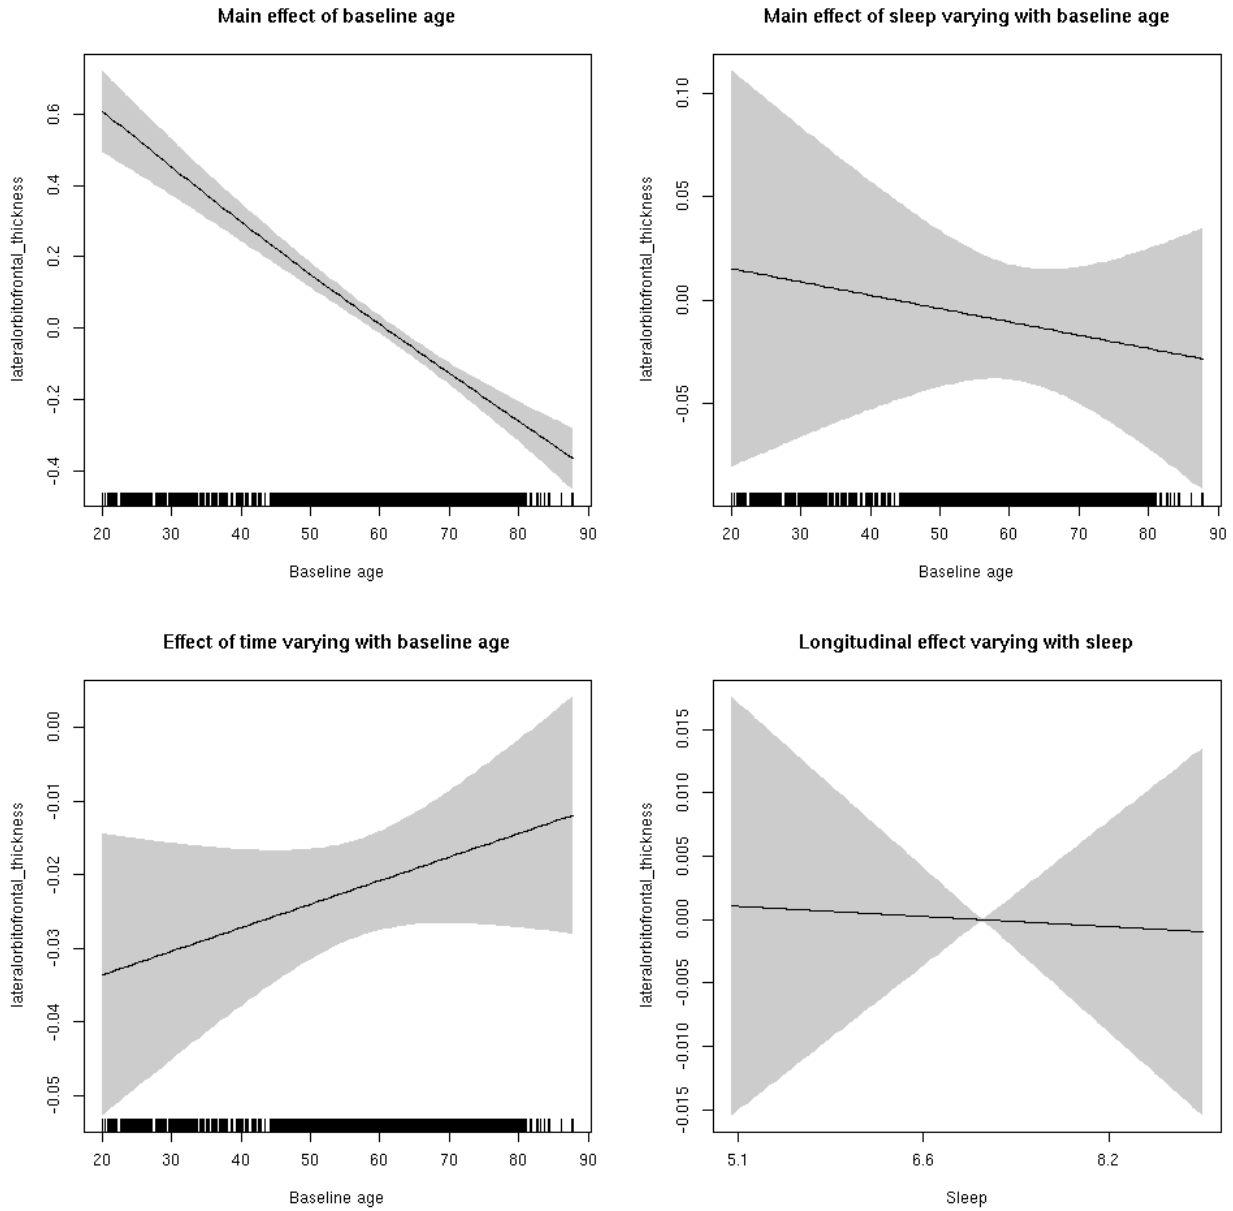

## lateralorbitofrontal\_volume: Stratified by sex

**Female: Full data** Below is the row for `s(sleep_z):time` from the model output.

```
## s(sleep_z):time  1.000  1.000  0.003  0.960
```

Below are plots of a plot of `s(bl_age)`, `s(bl_age):sleep_z`, `s(bl_age):time`, and `s(sleep_z):time`. For `s(sleep_z):time`, roughly, if we cannot fit a straight line through the confidence bands, there is evidence that the effect of time depends on sleep duration. It is correct that the confidence interval is zero at one point along the axis; this happens because we do not include the main effect.

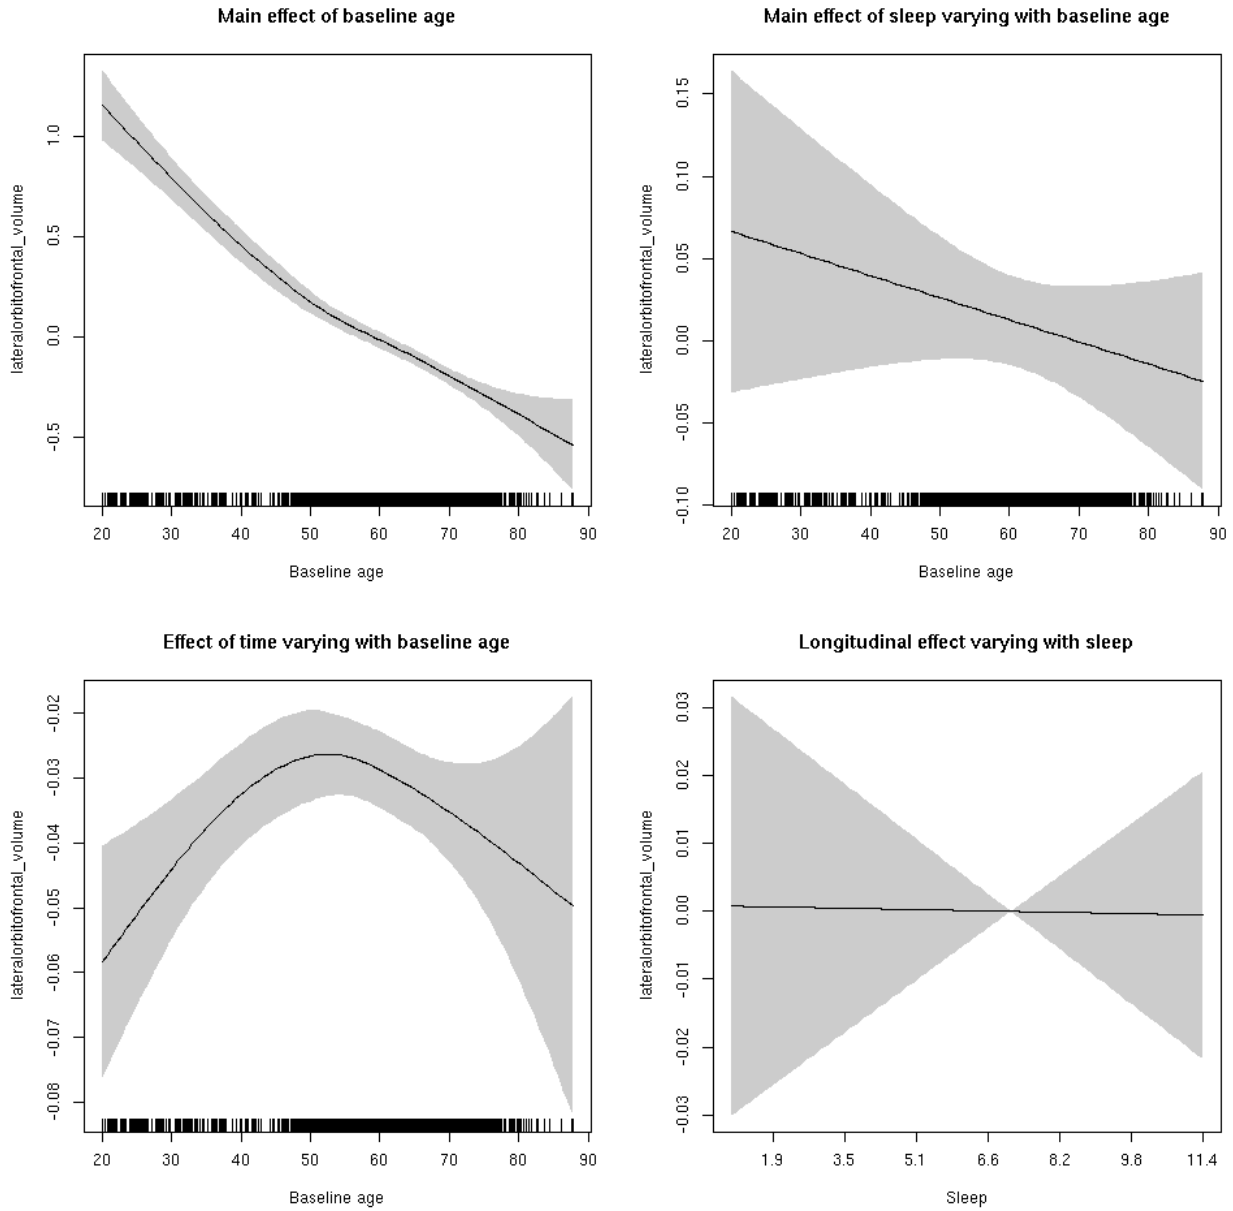

**Male: Full data** Below is the row for `s(sleep_z):time` from the model output.

```
## s(sleep_z):time  1.000  1.000  0.047  0.828
```

Below are plots of a plot of `s(bl_age)`, `s(bl_age):sleep_z`, `s(bl_age):time`, and `s(sleep_z):time`. For `s(sleep_z):time`, roughly, if we cannot fit a straight line through the confidence bands, there is evidence that the effect of time depends on sleep duration. It is correct that the confidence interval is zero at one point along the axis; this happens because we do not include the main effect.

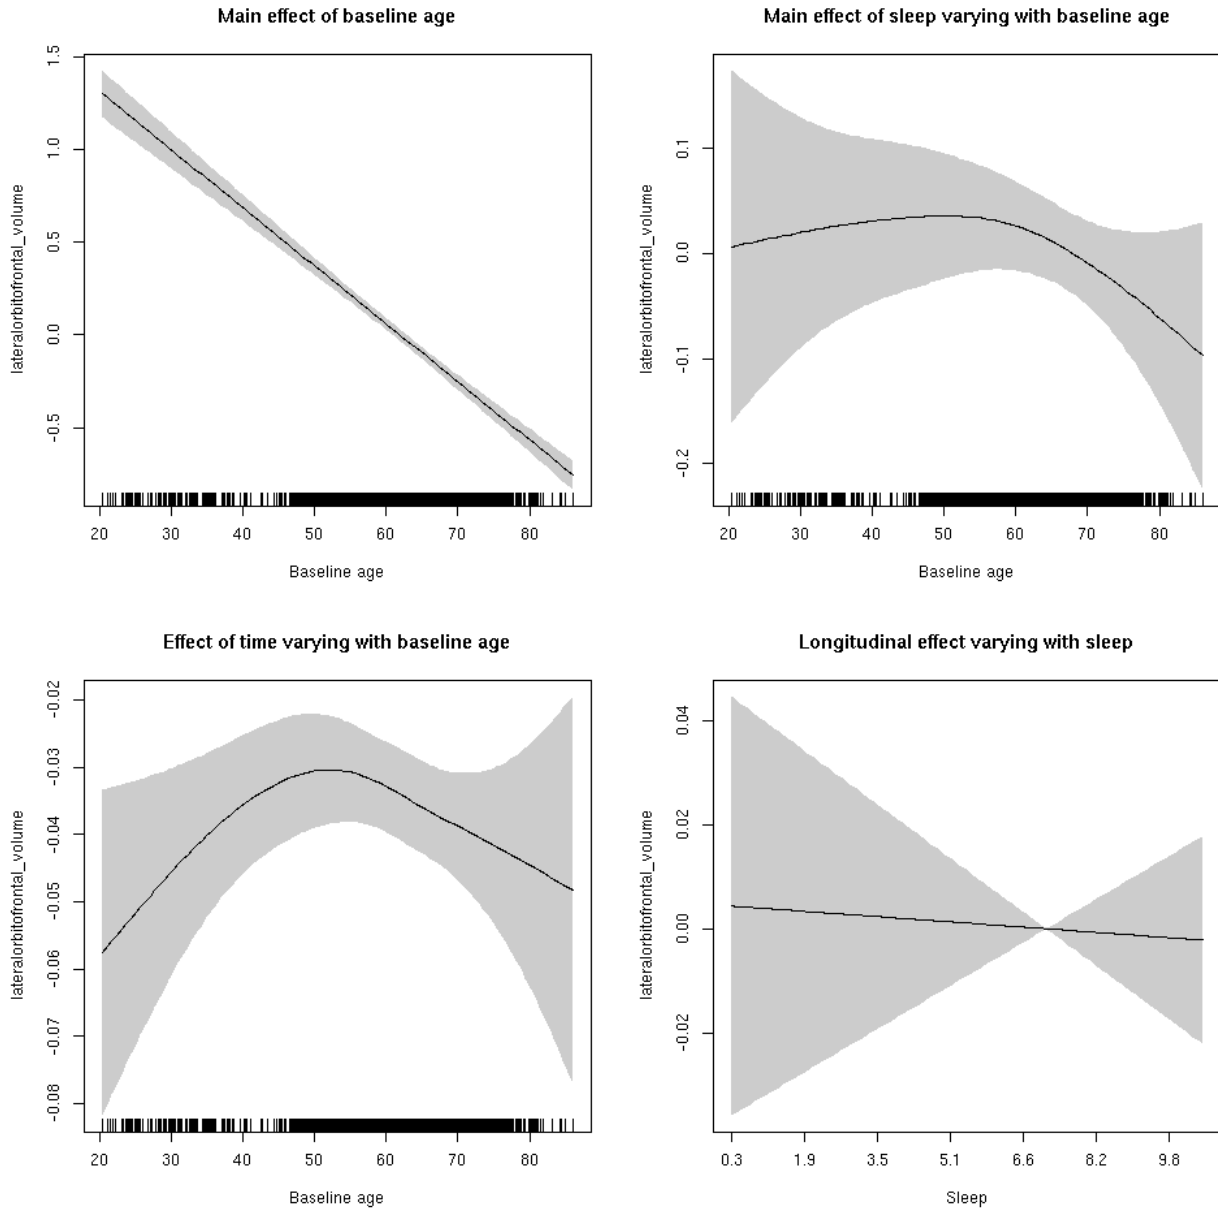

## lateralorbitofrontal\_volume

**Full data** Below is the model output. The term `s(sleep_z):time` is probably what we care most about.

```
##
## Family: gaussian
## Link function: identity
##
## Formula:
## value ~ sex + site + icv + s(bl_age, k = 10, bs = "cr") + s(bl_age,
##   by = sleep_z, bs = "cr") + +s(bl_age, by = time, k = 5, bs = "cr") +
##   s(sleep_z, by = time, k = 5, bs = "cr", pc = 0)
## <environment: 0x5630035aa1e8>
```

```

##
## Parametric coefficients:
##           Estimate Std. Error t value Pr(>|t|)
## (Intercept) -0.46529   0.04864  -9.565 < 2e-16 ***
## sexmale      0.17028   0.02499   6.814 1.01e-11 ***
## siteousAvanto -0.41798   0.05975  -6.995 2.86e-12 ***
## siteousPrisma -0.82641   0.18421  -4.486 7.35e-06 ***
## siteousSkyra  -0.05862   0.05783  -1.014 0.310829
## siteUB       -0.31188   0.11121  -2.804 0.005054 **
## siteUCAM     -0.34102   0.06022  -5.663 1.54e-08 ***
## siteUKB      0.57940   0.04612  12.563 < 2e-16 ***
## siteUmU      0.24614   0.06925   3.554 0.000381 ***
## icv          0.61414   0.01236  49.699 < 2e-16 ***
## ---
## Signif. codes:  0 '***' 0.001 '**' 0.01 '*' 0.05 '.' 0.1 ' ' 1
##
## Approximate significance of smooth terms:
##           edf Ref.df      F p-value
## s(bl_age)      3.051  3.051 256.162 <2e-16 ***
## s(bl_age):sleep_z 2.098  2.098   1.534   0.188
## s(bl_age):time  3.532  3.532 106.564 <2e-16 ***
## s(sleep_z):time  1.000  1.000   0.017   0.896
## ---
## Signif. codes:  0 '***' 0.001 '**' 0.01 '*' 0.05 '.' 0.1 ' ' 1
##
## R-sq.(adj) =  0.623
## lmer.REML = 9965.7  Scale est. = 0.052729  n = 8174

```

Below are plots of a plot of  $s(\text{bl\_age})$ ,  $s(\text{bl\_age}):\text{sleep\_z}$ ,  $s(\text{bl\_age}):\text{time}$ , and  $s(\text{sleep\_z}):\text{time}$ . For  $s(\text{sleep\_z}):\text{time}$ , roughly, if we cannot fit a straight line through the confidence bands, there is evidence that the effect of time depends on sleep duration. It is correct that the confidence interval is zero at one point along the axis; this happens because we do not include the main effect.

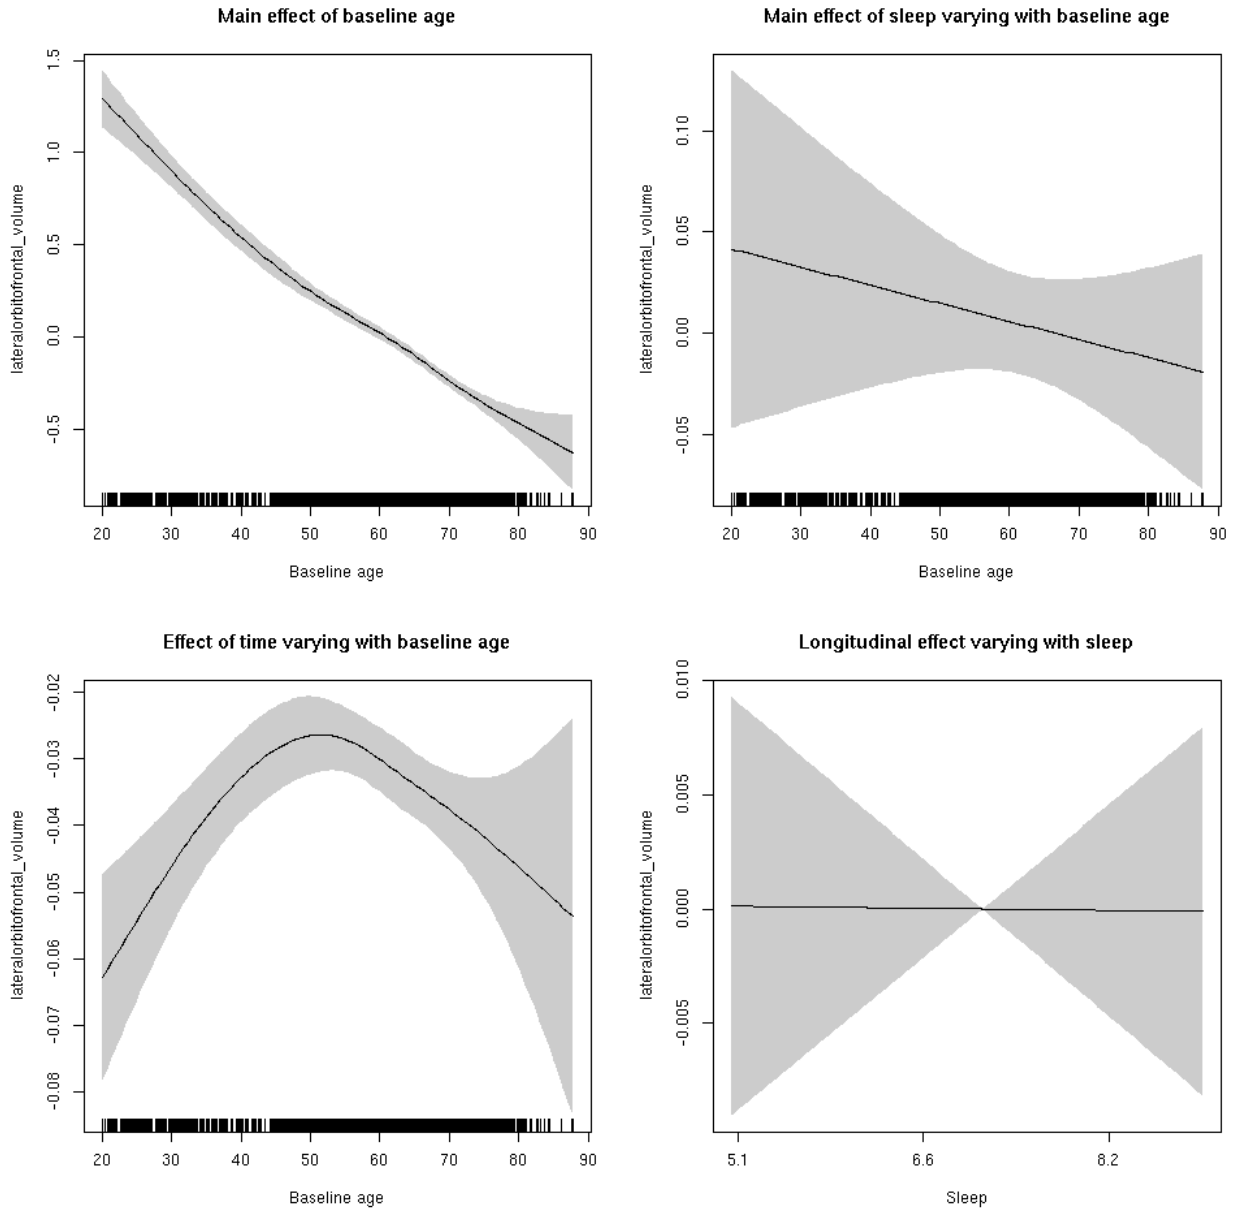

**Restricted to sleep  $\geq 5$  and  $\leq 9$  hours** Below is the row for `s(sleep_z):time` from the model output.

```
## s(sleep_z):time 1.000 1.000 0.001 0.978
```

Below are plots of a plot of `s(bl_age)`, `s(bl_age):sleep_z`, `s(bl_age):time`, and `s(sleep_z):time`. For `s(sleep_z):time`, roughly, if we cannot fit a straight line through the confidence bands, there is evidence that the effect of time depends on sleep duration. It is correct that the confidence interval is zero at one point along the axis; this happens because we do not include the main effect.

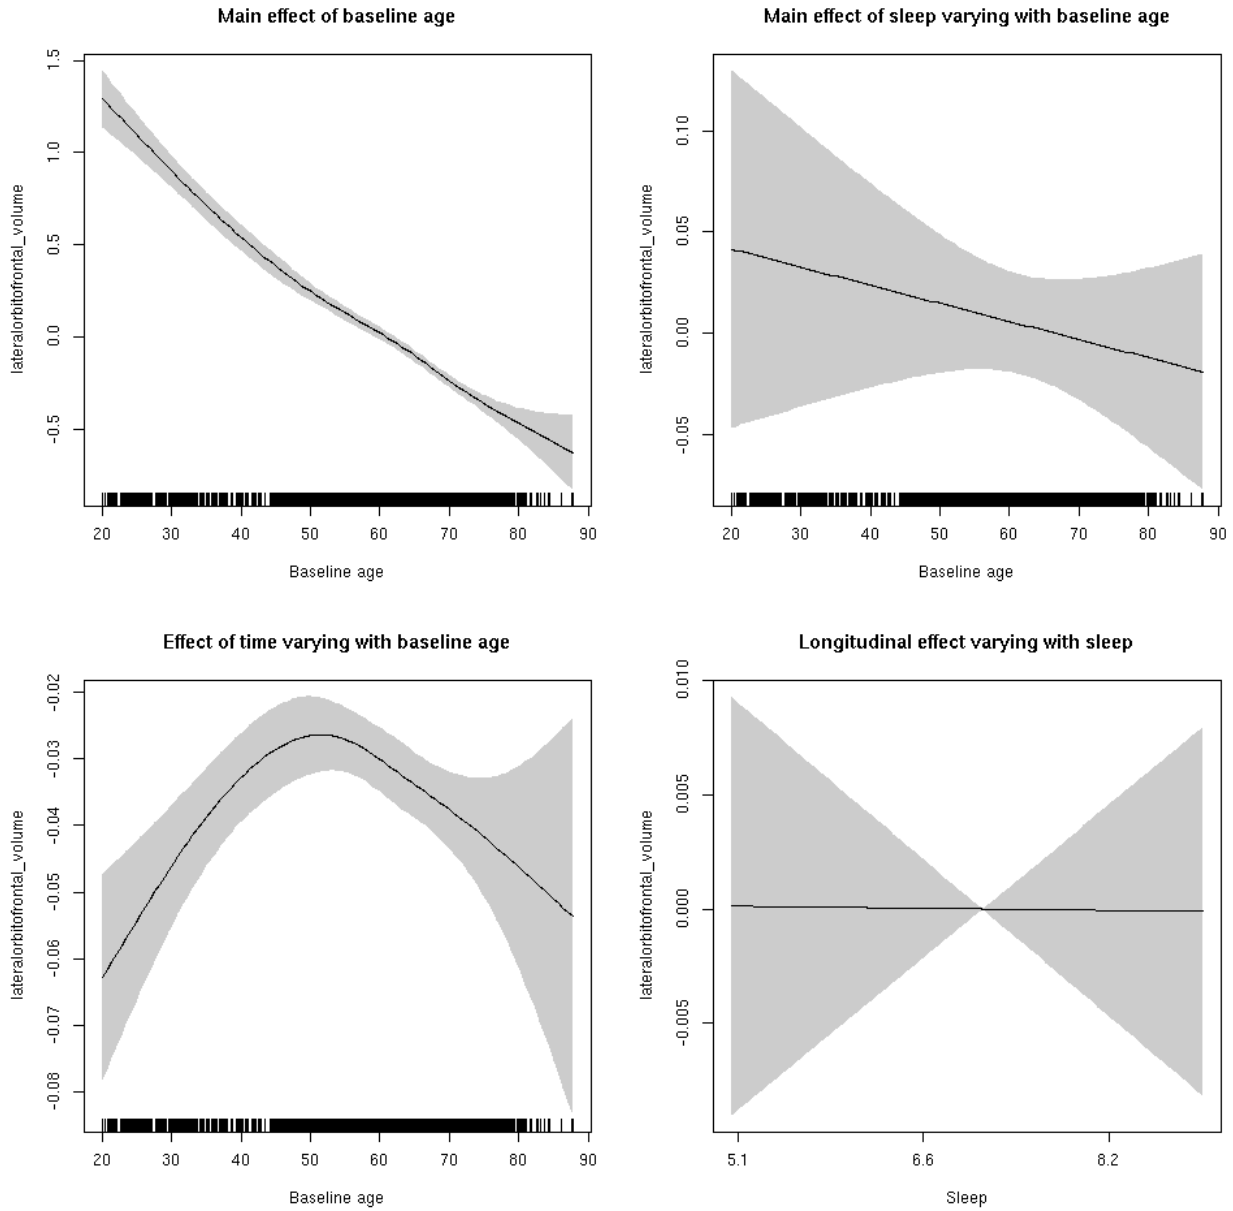

## lingual\_area: Stratified by sex

**Female: Full data** Below is the row for `s(sleep_z):time` from the model output.

```
## s(sleep_z):time  1.000  1.000  0.838  0.360
```

Below are plots of a plot of `s(bl_age)`, `s(bl_age):sleep_z`, `s(bl_age):time`, and `s(sleep_z):time`. For `s(sleep_z):time`, roughly, if we cannot fit a straight line through the confidence bands, there is evidence that the effect of time depends on sleep duration. It is correct that the confidence interval is zero at one point along the axis; this happens because we do not include the main effect.



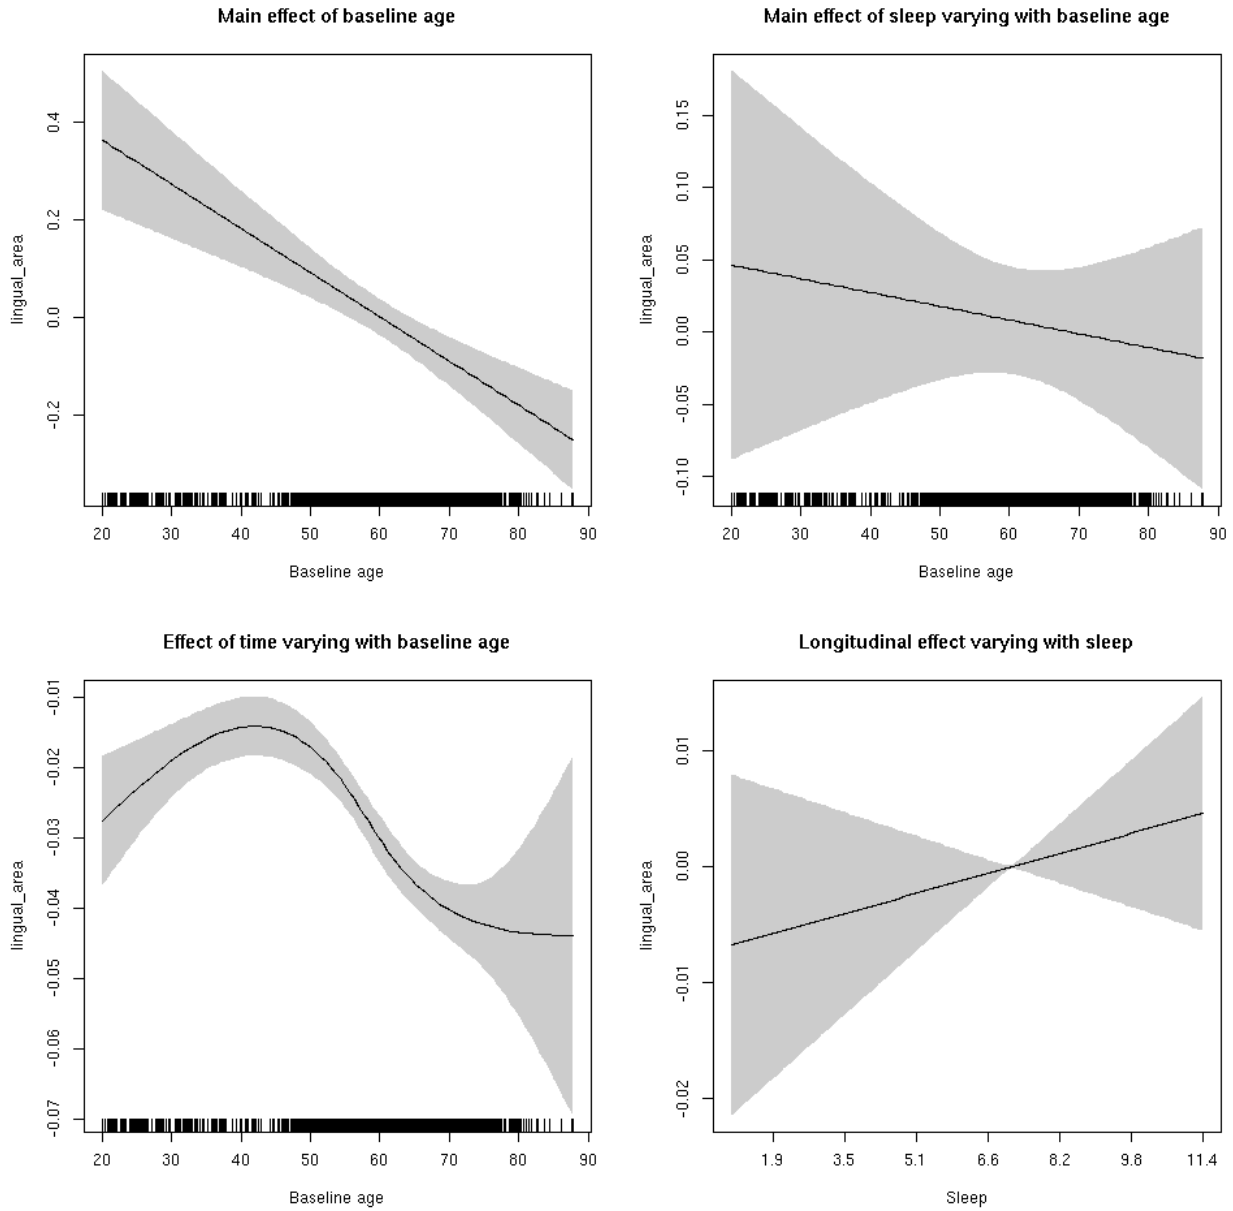

**Male: Full data** Below is the row for `s(sleep_z):time` from the model output.

```
## s(sleep_z):time  1.000  1.000  0.091  0.763
```

Below are plots of a plot of `s(bl_age)`, `s(bl_age):sleep_z`, `s(bl_age):time`, and `s(sleep_z):time`. For `s(sleep_z):time`, roughly, if we cannot fit a straight line through the confidence bands, there is evidence that the effect of time depends on sleep duration. It is correct that the confidence interval is zero at one point along the axis; this happens because we do not include the main effect.

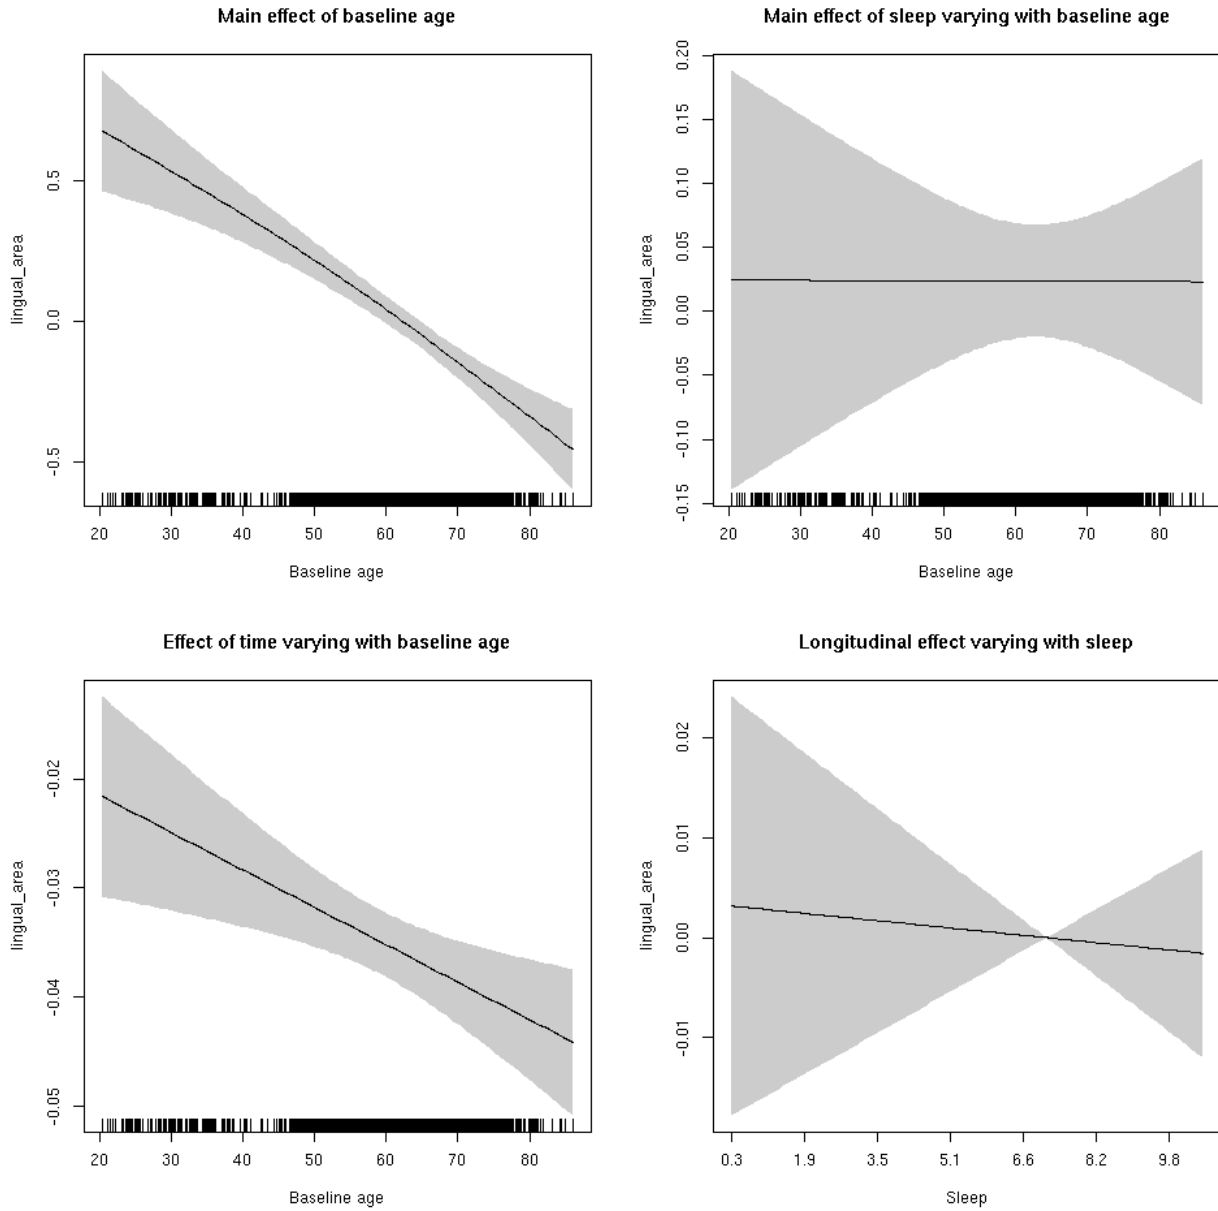

## lingual\_area

**Full data** Below is the model output. The term `s(sleep_z):time` is probably what we care most about.

```
##
## Family: gaussian
## Link function: identity
##
## Formula:
## value ~ sex + site + icv + s(bl_age, k = 10, bs = "cr") + s(bl_age,
##   by = sleep_z, bs = "cr") + +s(bl_age, by = time, k = 5, bs = "cr") +
##   s(sleep_z, by = time, k = 5, bs = "cr", pc = 0)
## <environment: 0x5630035b6258>
```

```

##
## Parametric coefficients:
##           Estimate Std. Error t value Pr(>|t|)
## (Intercept)  0.286932  0.064589  4.442 9.01e-06 ***
## sexmale      0.259607  0.033294  7.797 7.10e-15 ***
## siteousAvanto -0.338114  0.078929 -4.284 1.86e-05 ***
## siteousPrisma -0.344497  0.120487 -2.859 0.00426 **
## siteousSkyra -0.009223  0.076559 -0.120 0.90412
## siteUB       -0.419972  0.151198 -2.778 0.00549 **
## siteUCAM     -0.412015  0.080481 -5.119 3.13e-07 ***
## siteUKB      -0.372763  0.061223 -6.089 1.19e-09 ***
## siteUmU      -0.259305  0.093243 -2.781 0.00543 **
## icv          0.366247  0.015913 23.016 < 2e-16 ***
## ---
## Signif. codes:  0 '***' 0.001 '**' 0.01 '*' 0.05 '.' 0.1 ' ' 1
##
## Approximate significance of smooth terms:
##           edf Ref.df      F p-value
## s(bl_age)      1.996  1.996 55.503 <2e-16 ***
## s(bl_age):sleep_z 2.000  2.000  0.613  0.542
## s(bl_age):time  4.161  4.161 303.749 <2e-16 ***
## s(sleep_z):time  1.000  1.000  0.402  0.526
## ---
## Signif. codes:  0 '***' 0.001 '**' 0.01 '*' 0.05 '.' 0.1 ' ' 1
##
## R-sq.(adj) =  0.263
## lmer.REML = 6378.5  Scale est. = 0.013129  n = 8166

```

Below are plots of a plot of  $s(\text{bl\_age})$ ,  $s(\text{bl\_age}):\text{sleep\_z}$ ,  $s(\text{bl\_age}):\text{time}$ , and  $s(\text{sleep\_z}):\text{time}$ . For  $s(\text{sleep\_z}):\text{time}$ , roughly, if we cannot fit a straight line through the confidence bands, there is evidence that the effect of time depends on sleep duration. It is correct that the confidence interval is zero at one point along the axis; this happens because we do not include the main effect.

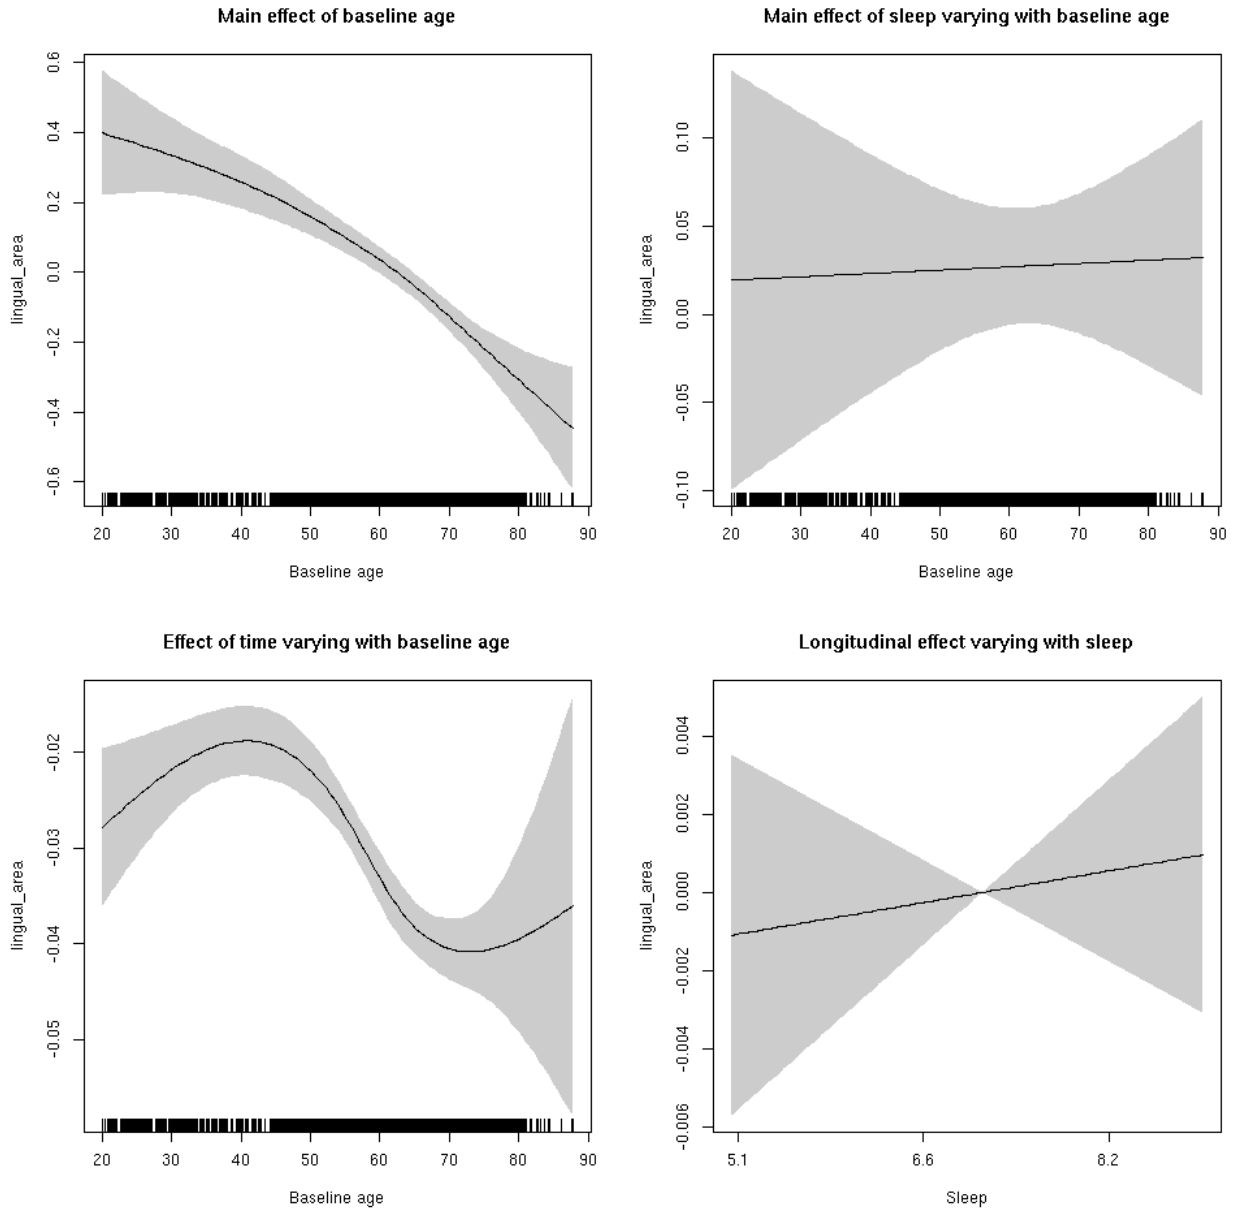

**Restricted to sleep  $\geq 5$  and  $\leq 9$  hours** Below is the row for `s(sleep_z):time` from the model output.

```
## s(sleep_z):time  1.000  1.000  0.227  0.634
```

Below are plots of a plot of `s(bl_age)`, `s(bl_age):sleep_z`, `s(bl_age):time`, and `s(sleep_z):time`. For `s(sleep_z):time`, roughly, if we cannot fit a straight line through the confidence bands, there is evidence that the effect of time depends on sleep duration. It is correct that the confidence interval is zero at one point along the axis; this happens because we do not include the main effect.



## lingual\_thickness: Stratified by sex

**Female: Full data** Below is the row for `s(sleep_z):time` from the model output.

```
## s(sleep_z):time  1.000  1.000  0.011  0.9155
```

Below are plots of a plot of `s(bl_age)`, `s(bl_age):sleep_z`, `s(bl_age):time`, and `s(sleep_z):time`. For `s(sleep_z):time`, roughly, if we cannot fit a straight line through the confidence bands, there is evidence that the effect of time depends on sleep duration. It is correct that the confidence interval is zero at one point along the axis; this happens because we do not include the main effect.

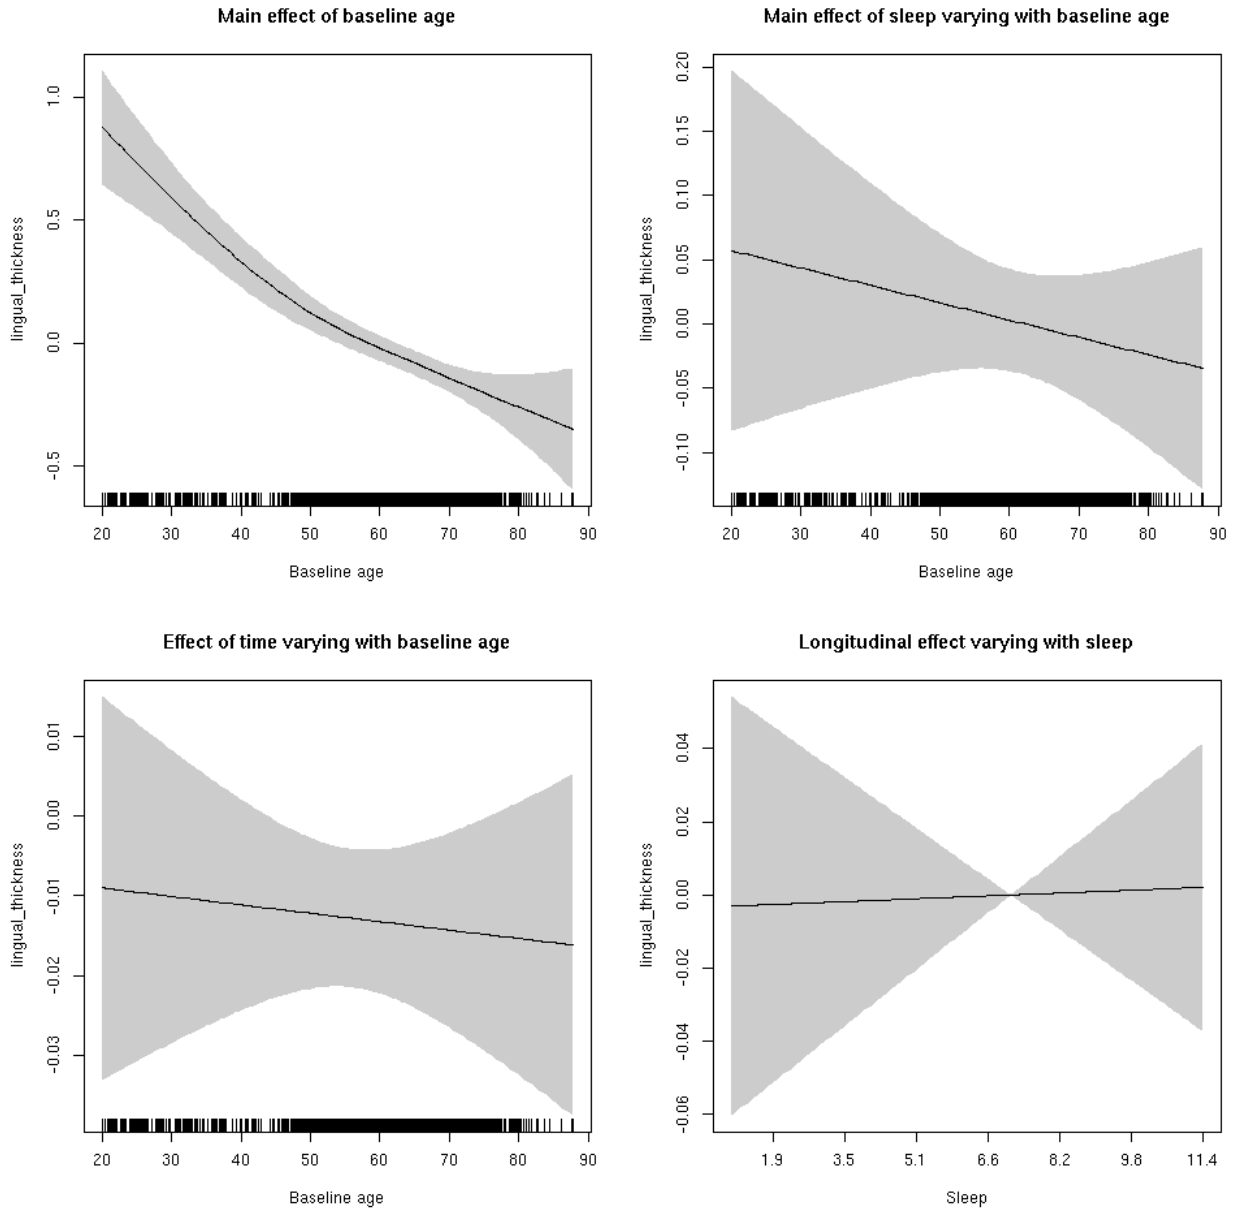

**Male: Full data** Below is the row for `s(sleep_z):time` from the model output.

```
## s(sleep_z):time  1.000  1.000  0.026  0.873
```

Below are plots of a plot of `s(bl_age)`, `s(bl_age):sleep_z`, `s(bl_age):time`, and `s(sleep_z):time`. For `s(sleep_z):time`, roughly, if we cannot fit a straight line through the confidence bands, there is evidence that the effect of time depends on sleep duration. It is correct that the confidence interval is zero at one point along the axis; this happens because we do not include the main effect.

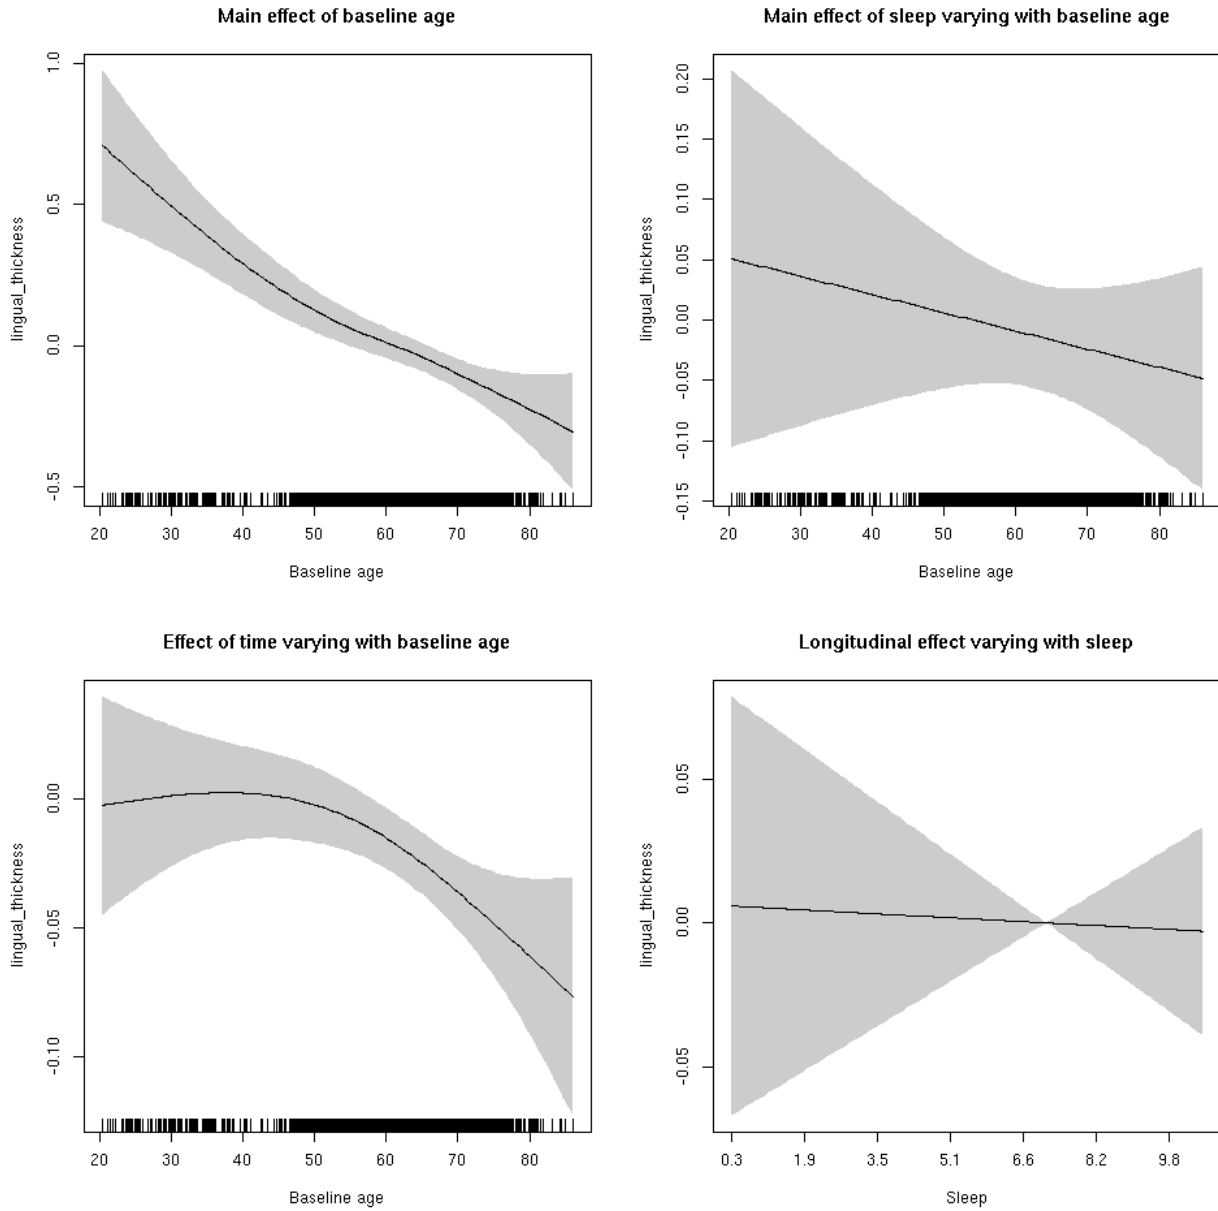

## lingual\_thickness

**Full data** Below is the model output. The term `s(sleep_z):time` is probably what we care most about.

```
##
## Family: gaussian
## Link function: identity
##
## Formula:
## value ~ sex + site + s(bl_age, k = 10, bs = "cr") + s(bl_age,
##   by = sleep_z, bs = "cr") + +s(bl_age, by = time, k = 5, bs = "cr") +
##   s(sleep_z, by = time, k = 5, bs = "cr", pc = 0)
## <environment: 0x5630035cc2c8>
```

```

##
## Parametric coefficients:
##           Estimate Std. Error t value Pr(>|t|)
## (Intercept) -0.86427    0.05492 -15.736 < 2e-16 ***
## sexmale      0.09724    0.02755   3.530 0.000418 ***
## siteousAvanto 0.01162    0.07320   0.159 0.873844
## siteousPrisma 0.71563    0.32374   2.211 0.027097 *
## siteousSkyra  1.45433    0.07315  19.881 < 2e-16 ***
## siteUB       0.48510    0.14565   3.331 0.000870 ***
## siteUCAM     0.40078    0.07549   5.309 1.13e-07 ***
## siteUKB      0.94851    0.05560  17.059 < 2e-16 ***
## siteUmU      1.14592    0.09060  12.648 < 2e-16 ***
## ---
## Signif. codes:  0 '***' 0.001 '**' 0.01 '*' 0.05 '.' 0.1 ' ' 1
##
## Approximate significance of smooth terms:
##           edf Ref.df      F p-value
## s(bl_age)      3.309  3.309 43.949 <2e-16 ***
## s(bl_age):sleep_z 2.000  2.000  0.916    0.40
## s(bl_age):time  3.160  3.160 11.426 <2e-16 ***
## s(sleep_z):time 1.000  1.000  0.006    0.94
## ---
## Signif. codes:  0 '***' 0.001 '**' 0.01 '*' 0.05 '.' 0.1 ' ' 1
##
## R-sq.(adj) =  0.178
## lmer.REML = 17503  Scale est. = 0.18197  n = 8178

```

Below are plots of a plot of `s(bl_age)`, `s(bl_age):sleep_z`, `s(bl_age):time`, and `s(sleep_z):time`. For `s(sleep_z):time`, roughly, if we cannot fit a straight line through the confidence bands, there is evidence that the effect of time depends on sleep duration. It is correct that the confidence interval is zero at one point along the axis; this happens because we do not include the main effect.



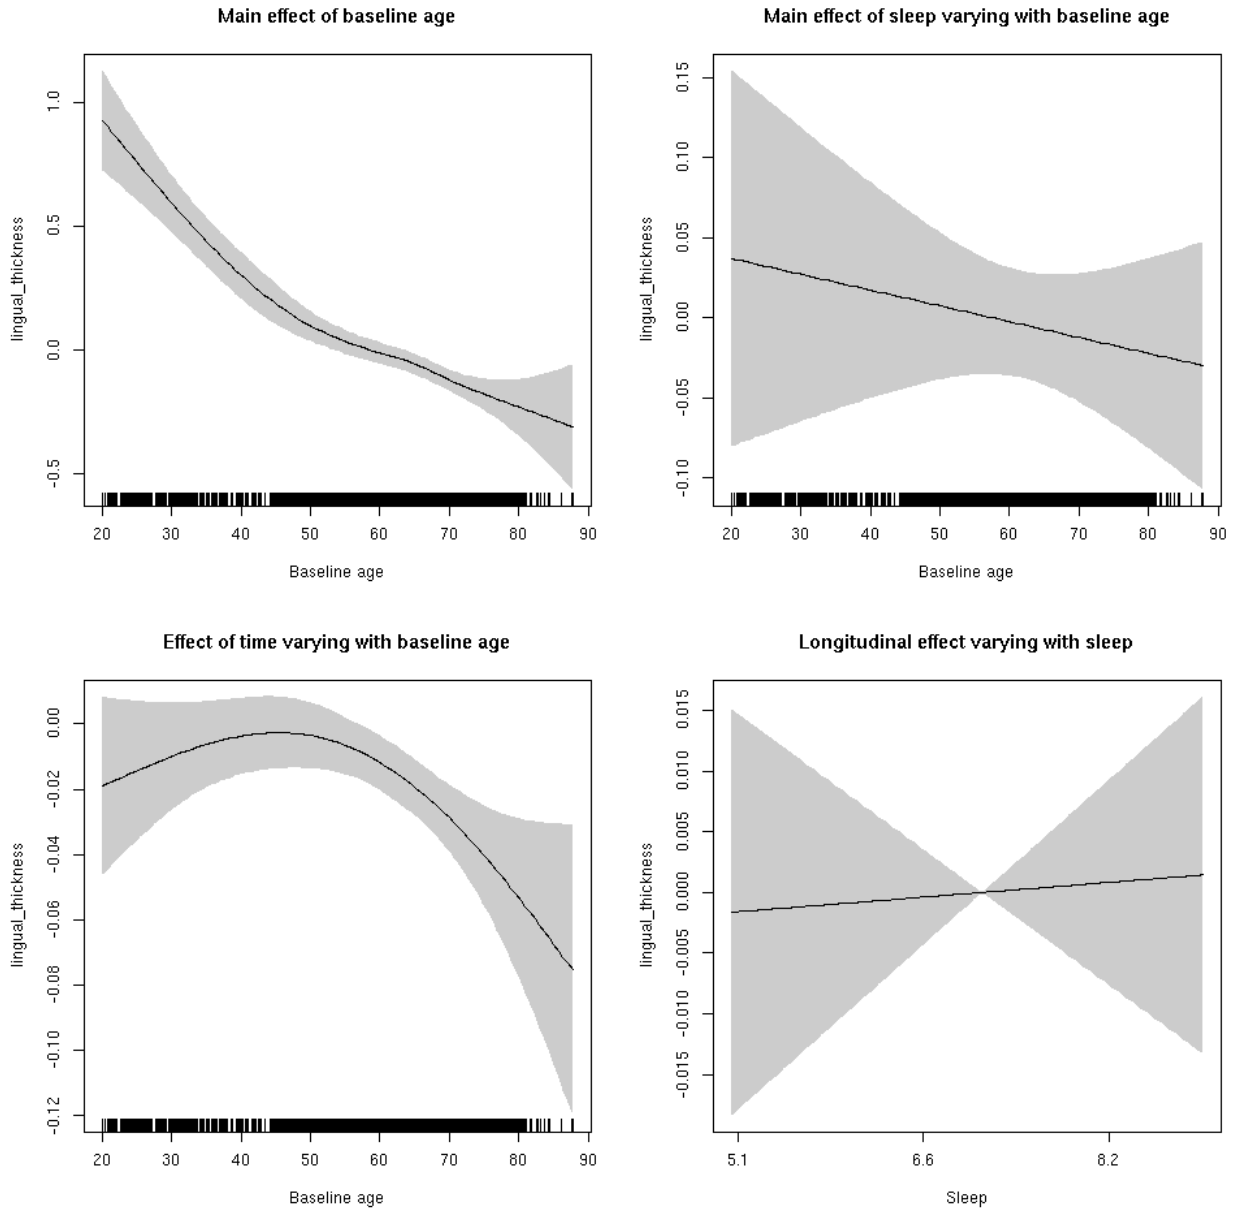

**Restricted to sleep  $\geq 5$  and  $\leq 9$  hours** Below is the row for `s(sleep_z):time` from the model output.

```
## s(sleep_z):time  1.000  1.000  0.038  0.845
```

Below are plots of a plot of `s(bl_age)`, `s(bl_age):sleep_z`, `s(bl_age):time`, and `s(sleep_z):time`. For `s(sleep_z):time`, roughly, if we cannot fit a straight line through the confidence bands, there is evidence that the effect of time depends on sleep duration. It is correct that the confidence interval is zero at one point along the axis; this happens because we do not include the main effect.



## lingual\_volume: Stratified by sex

**Female: Full data** Below is the row for `s(sleep_z):time` from the model output.

```
## s(sleep_z):time  1.000  1.000  0.047  0.828
```

Below are plots of a plot of `s(bl_age)`, `s(bl_age):sleep_z`, `s(bl_age):time`, and `s(sleep_z):time`. For `s(sleep_z):time`, roughly, if we cannot fit a straight line through the confidence bands, there is evidence that the effect of time depends on sleep duration. It is correct that the confidence interval is zero at one point along the axis; this happens because we do not include the main effect.

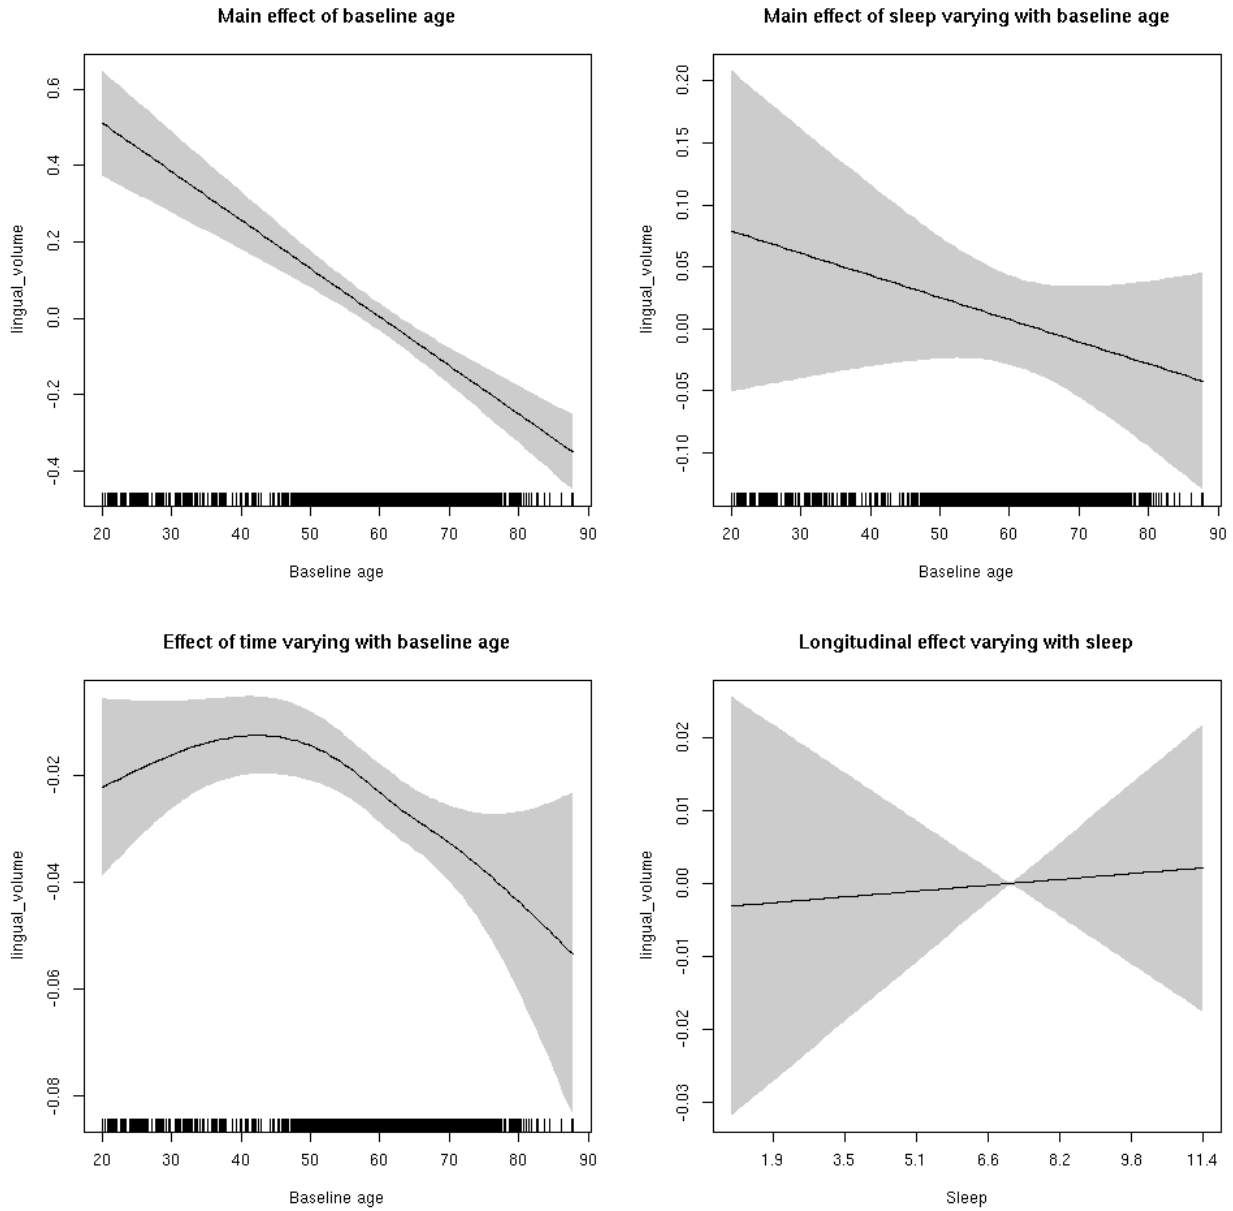

**Male: Full data** Below is the row for `s(sleep_z):time` from the model output.

```
## s(sleep_z):time  1.000  1.000  0.012  0.913
```

Below are plots of a plot of `s(bl_age)`, `s(bl_age):sleep_z`, `s(bl_age):time`, and `s(sleep_z):time`. For `s(sleep_z):time`, roughly, if we cannot fit a straight line through the confidence bands, there is evidence that the effect of time depends on sleep duration. It is correct that the confidence interval is zero at one point along the axis; this happens because we do not include the main effect.

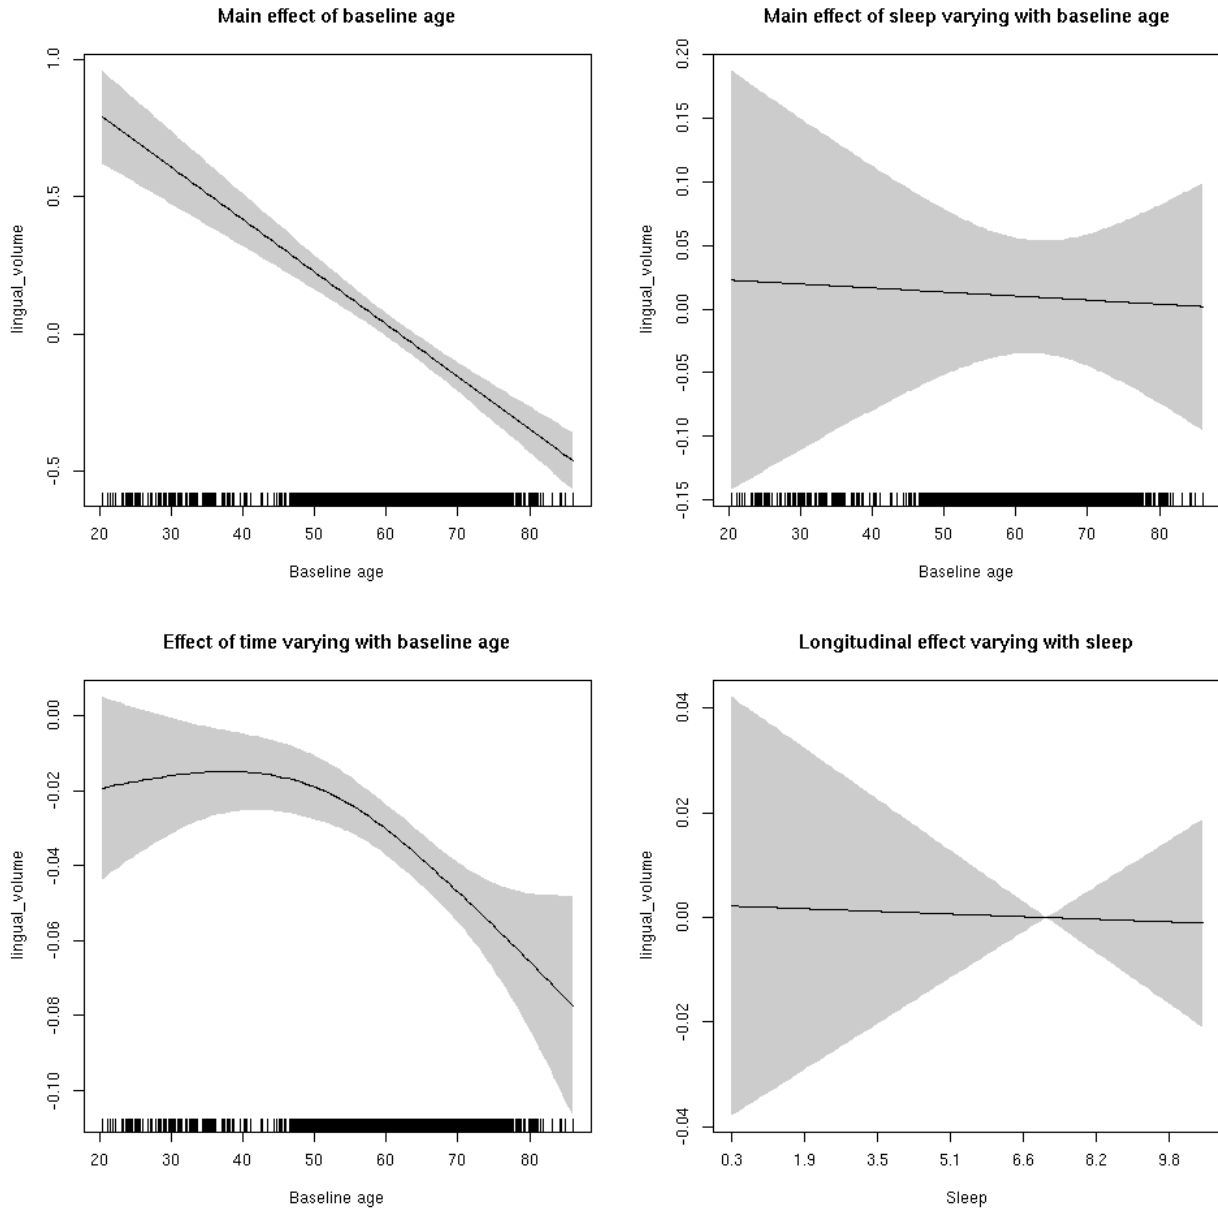

## lingual\_volume

**Full data** Below is the model output. The term `s(sleep_z):time` is probably what we care most about.

```
##
## Family: gaussian
## Link function: identity
##
## Formula:
## value ~ sex + site + icv + s(bl_age, k = 10, bs = "cr") + s(bl_age,
##   by = sleep_z, bs = "cr") + +s(bl_age, by = time, k = 5, bs = "cr") +
##   s(sleep_z, by = time, k = 5, bs = "cr", pc = 0)
## <environment: 0x5630035b1ce0>
```

```

##
## Parametric coefficients:
##           Estimate Std. Error t value Pr(>|t|)
## (Intercept)  0.01533   0.06472   0.237  0.8128
## sexmale      0.19034   0.03318   5.737 9.95e-09 ***
## siteousAvanto -0.39819  0.07897  -5.043 4.69e-07 ***
## siteousPrisma  0.06932   0.18737   0.370  0.7114
## siteousSkyra  0.72423   0.07648   9.470 < 2e-16 ***
## siteUB       -0.09748   0.14871  -0.655  0.5122
## siteUCAM     -0.20378   0.08117  -2.510  0.0121 *
## siteUKB      -0.02567   0.06170  -0.416  0.6774
## siteUmU      0.41082   0.09226   4.453 8.59e-06 ***
## icv          0.36894   0.01633  22.596 < 2e-16 ***
## ---
## Signif. codes:  0 '***' 0.001 '**' 0.01 '*' 0.05 '.' 0.1 ' ' 1
##
## Approximate significance of smooth terms:
##           edf Ref.df    F p-value
## s(bl_age)      5.920  5.920 27.386 <2e-16 ***
## s(bl_age):sleep_z 2.000  2.000  0.369  0.692
## s(bl_age):time  3.662  3.662 82.966 <2e-16 ***
## s(sleep_z):time  1.000  1.000  0.013  0.908
## ---
## Signif. codes:  0 '***' 0.001 '**' 0.01 '*' 0.05 '.' 0.1 ' ' 1
##
## R-sq.(adj) =  0.285
## lmer.REML = 11862  Scale est. = 0.048636  n = 8176

```

Below are plots of a plot of  $s(\text{bl\_age})$ ,  $s(\text{bl\_age}):\text{sleep\_z}$ ,  $s(\text{bl\_age}):\text{time}$ , and  $s(\text{sleep\_z}):\text{time}$ . For  $s(\text{sleep\_z}):\text{time}$ , roughly, if we cannot fit a straight line through the confidence bands, there is evidence that the effect of time depends on sleep duration. It is correct that the confidence interval is zero at one point along the axis; this happens because we do not include the main effect.

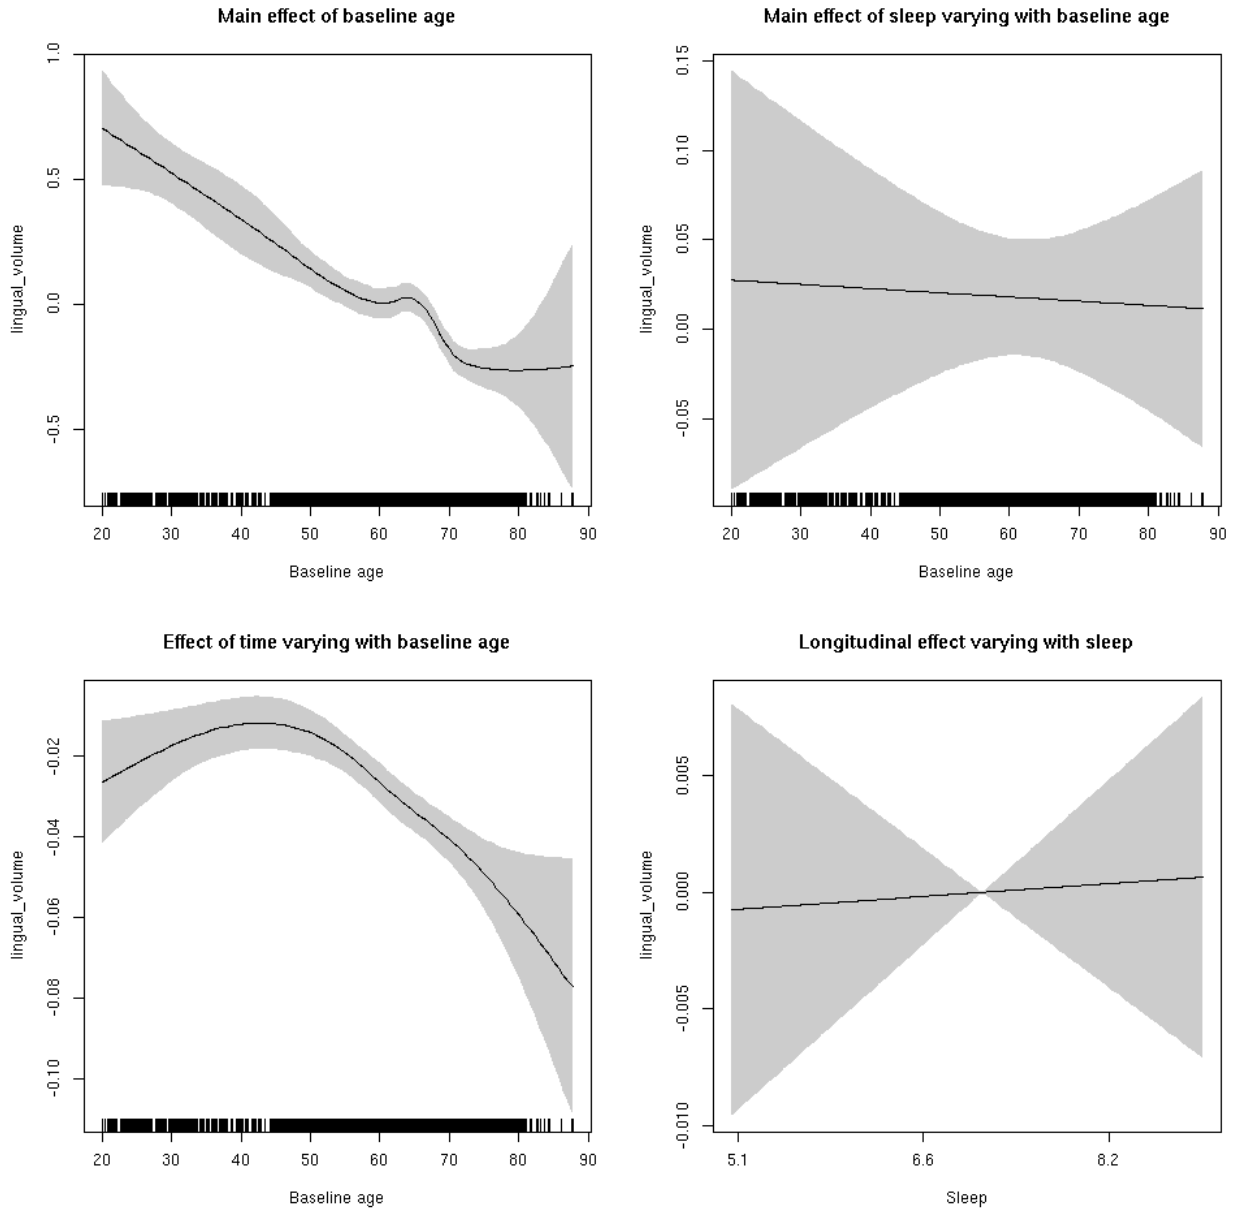

**Restricted to sleep  $\geq 5$  and  $\leq 9$  hours** Below is the row for `s(sleep_z):time` from the model output.

```
## s(sleep_z):time  1.000  1.000  0.028  0.867
```

Below are plots of a plot of `s(bl_age)`, `s(bl_age):sleep_z`, `s(bl_age):time`, and `s(sleep_z):time`. For `s(sleep_z):time`, roughly, if we cannot fit a straight line through the confidence bands, there is evidence that the effect of time depends on sleep duration. It is correct that the confidence interval is zero at one point along the axis; this happens because we do not include the main effect.



## medialorbitofrontal\_area: Stratified by sex

**Female: Full data** Below is the row for `s(sleep_z):time` from the model output.

```
## s(sleep_z):time  1.000  1.000  3.842  0.0501 .
```

Below are plots of a plot of `s(bl_age)`, `s(bl_age):sleep_z`, `s(bl_age):time`, and `s(sleep_z):time`. For `s(sleep_z):time`, roughly, if we cannot fit a straight line through the confidence bands, there is evidence that the effect of time depends on sleep duration. It is correct that the confidence interval is zero at one point along the axis; this happens because we do not include the main effect.

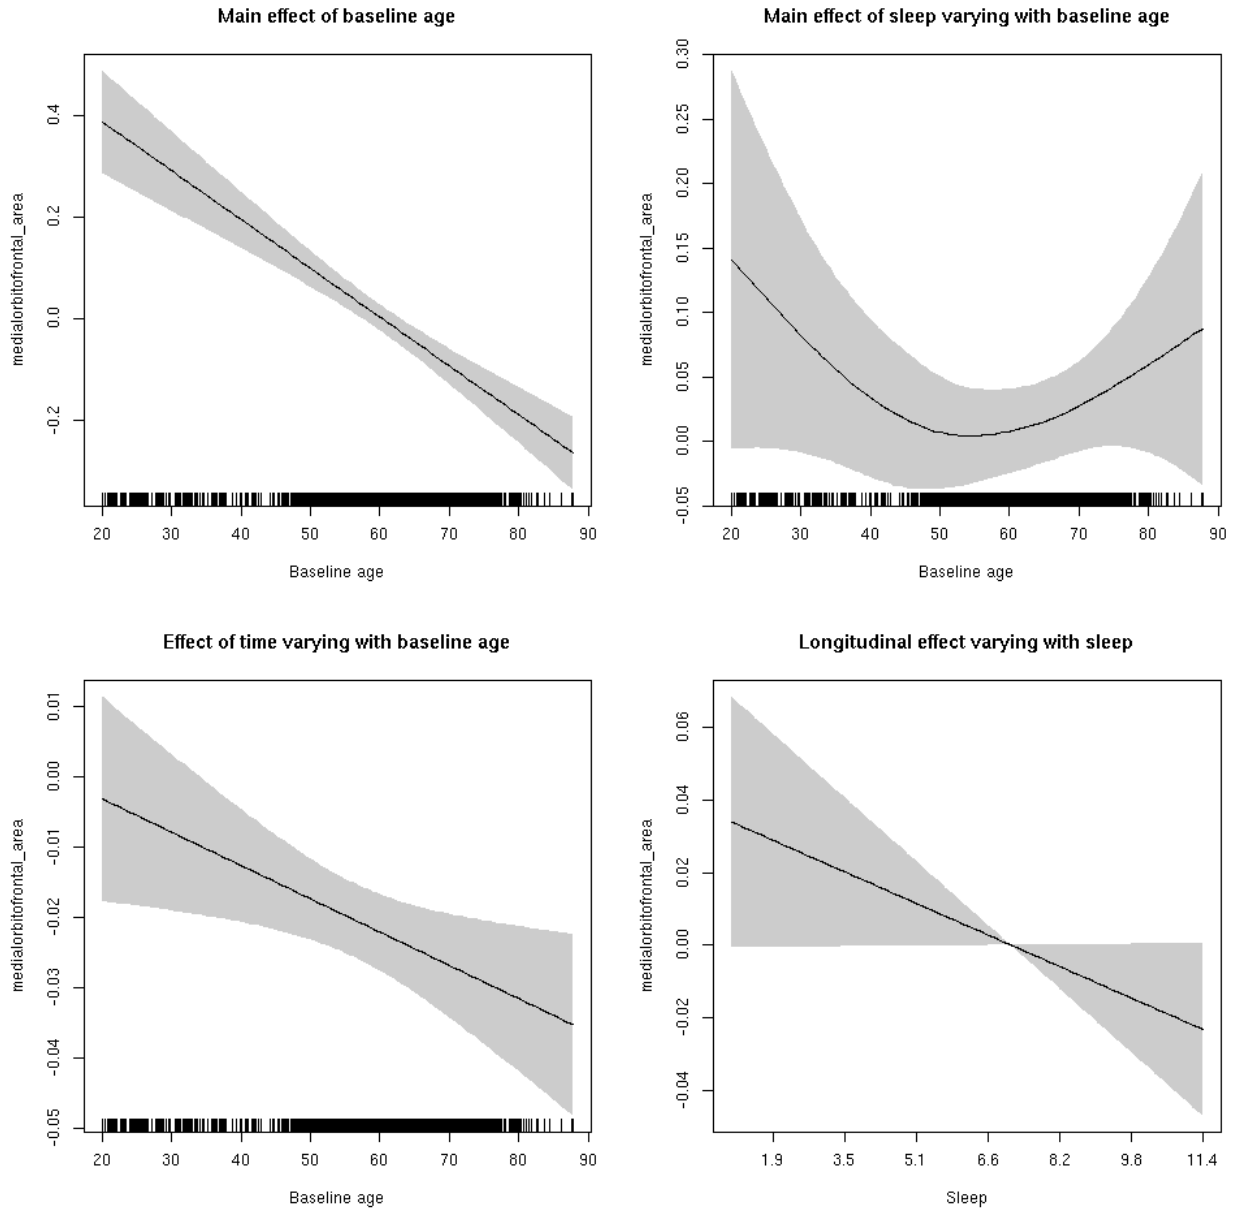

**Male: Full data** Below is the row for `s(sleep_z):time` from the model output.

```
## s(sleep_z):time  1.000  1.000  0.301  0.5834
```

Below are plots of a plot of `s(bl_age)`, `s(bl_age):sleep_z`, `s(bl_age):time`, and `s(sleep_z):time`. For `s(sleep_z):time`, roughly, if we cannot fit a straight line through the confidence bands, there is evidence that the effect of time depends on sleep duration. It is correct that the confidence interval is zero at one point along the axis; this happens because we do not include the main effect.



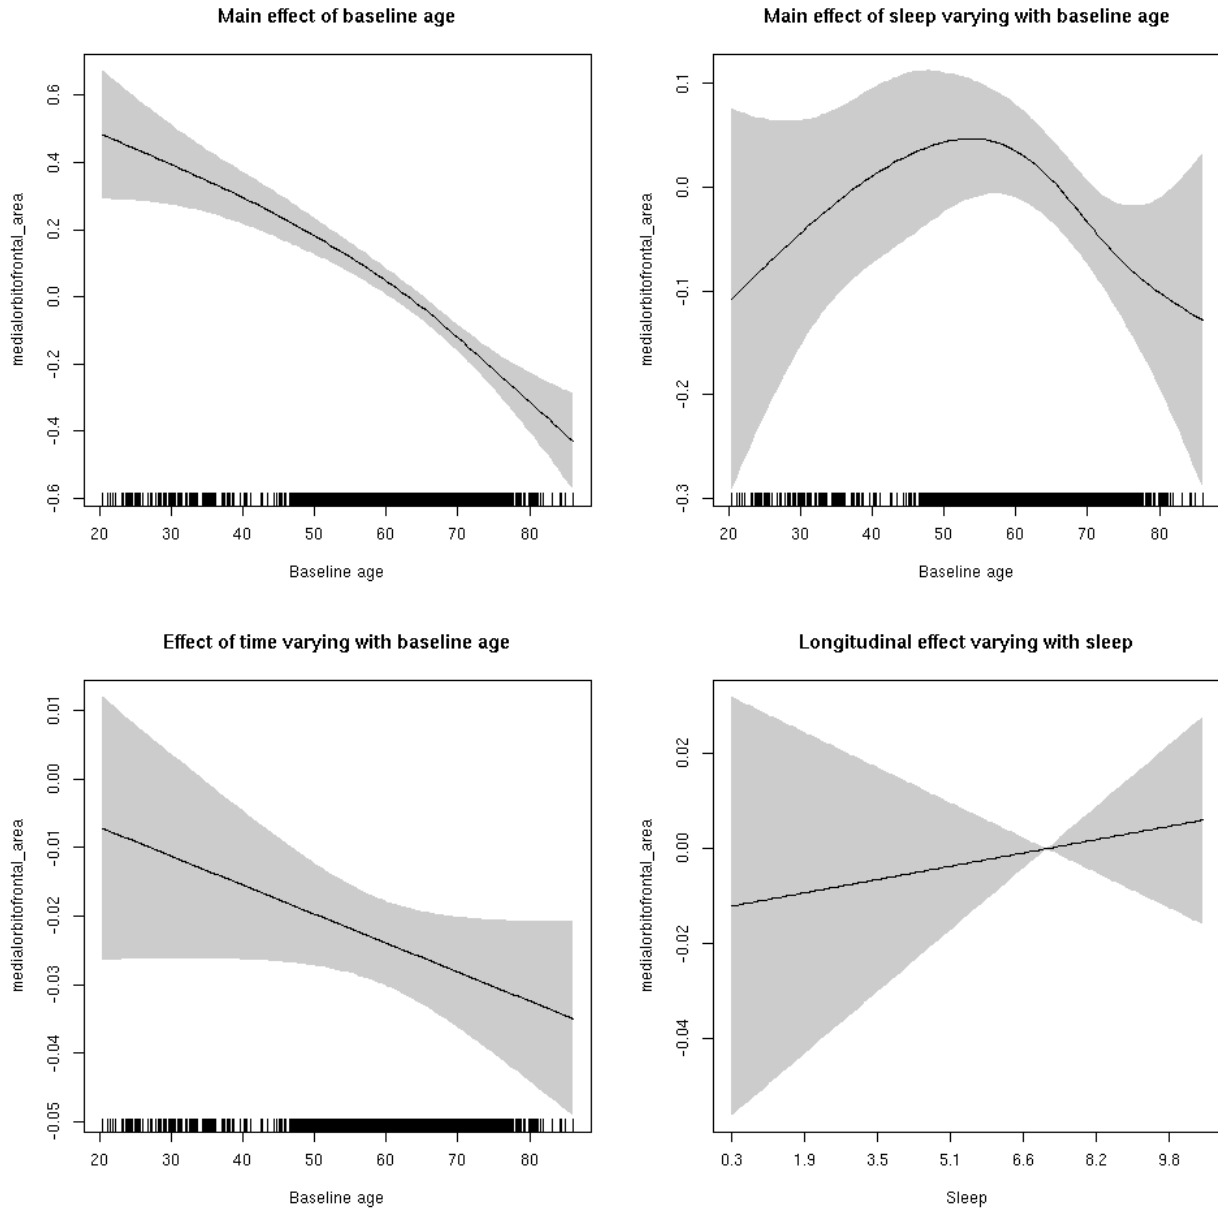

## medialorbitofrontal\_area

**Full data** Below is the model output. The term `s(sleep_z):time` is probably what we care most about.

```
##
## Family: gaussian
## Link function: identity
##
## Formula:
## value ~ sex + site + icv + s(bl_age, k = 10, bs = "cr") + s(bl_age,
##   by = sleep_z, bs = "cr") + +s(bl_age, by = time, k = 5, bs = "cr") +
##   s(sleep_z, by = time, k = 5, bs = "cr", pc = 0)
## <environment: 0x5630035ac840>
```

```

##
## Parametric coefficients:
##           Estimate Std. Error t value Pr(>|t|)
## (Intercept)  0.54567    0.04624  11.800 < 2e-16 ***
## sexmale      0.22432    0.02374   9.447 < 2e-16 ***
## siteousAvanto 0.09070    0.05712   1.588 0.11232
## siteousPrisma -0.86062    0.20192  -4.262 2.05e-05 ***
## siteousSkyra  0.50028    0.05526   9.053 < 2e-16 ***
## siteUB       -0.32091    0.10532  -3.047 0.00232 **
## siteUCAM     -0.40907    0.05715  -7.157 8.94e-13 ***
## siteUKB      -0.65163    0.04378 -14.885 < 2e-16 ***
## siteUmU      0.38995    0.06581   5.925 3.25e-09 ***
## icv          0.64373    0.01176  54.738 < 2e-16 ***
## ---
## Signif. codes:  0 '***' 0.001 '**' 0.01 '*' 0.05 '.' 0.1 ' ' 1
##
## Approximate significance of smooth terms:
##           edf Ref.df    F p-value
## s(bl_age)      2.777  2.777 58.157 <2e-16 ***
## s(bl_age):sleep_z 2.000  2.000  0.929  0.395
## s(bl_age):time  2.000  2.000 62.084 <2e-16 ***
## s(sleep_z):time 1.000  1.000  0.997  0.318
## ---
## Signif. codes:  0 '***' 0.001 '**' 0.01 '*' 0.05 '.' 0.1 ' ' 1
##
## R-sq.(adj) =  0.632
## lmer.REML = 10559  Scale est. = 0.066523  n = 8178

```

Below are plots of a plot of `s(bl_age)`, `s(bl_age):sleep_z`, `s(bl_age):time`, and `s(sleep_z):time`. For `s(sleep_z):time`, roughly, if we cannot fit a straight line through the confidence bands, there is evidence that the effect of time depends on sleep duration. It is correct that the confidence interval is zero at one point along the axis; this happens because we do not include the main effect.

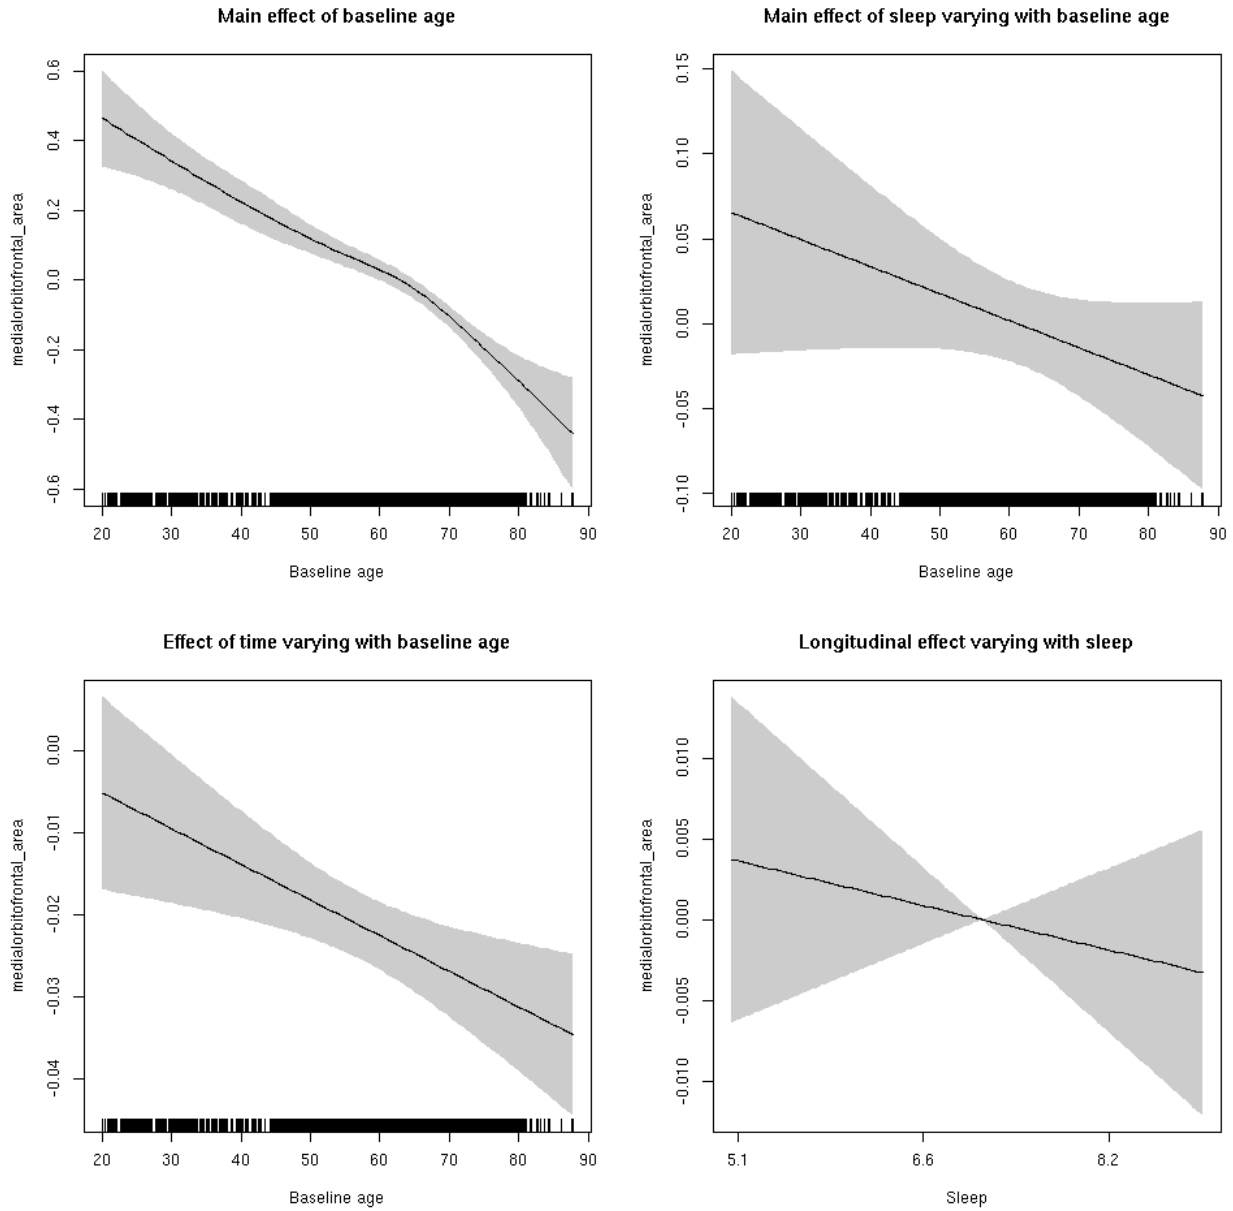

**Restricted to sleep  $\geq 5$  and  $\leq 9$  hours** Below is the row for `s(sleep_z):time` from the model output.

```
## s(sleep_z):time 1.000 1.000 0.547 0.460
```

Below are plots of a plot of `s(bl_age)`, `s(bl_age):sleep_z`, `s(bl_age):time`, and `s(sleep_z):time`. For `s(sleep_z):time`, roughly, if we cannot fit a straight line through the confidence bands, there is evidence that the effect of time depends on sleep duration. It is correct that the confidence interval is zero at one point along the axis; this happens because we do not include the main effect.



## medialorbitofrontal\_thickness: Stratified by sex

**Female: Full data** Below is the row for `s(sleep_z):time` from the model output.

```
## s(sleep_z):time  1.000  1.000  0.468  0.494
```

Below are plots of a plot of `s(bl_age)`, `s(bl_age):sleep_z`, `s(bl_age):time`, and `s(sleep_z):time`. For `s(sleep_z):time`, roughly, if we cannot fit a straight line through the confidence bands, there is evidence that the effect of time depends on sleep duration. It is correct that the confidence interval is zero at one point along the axis; this happens because we do not include the main effect.

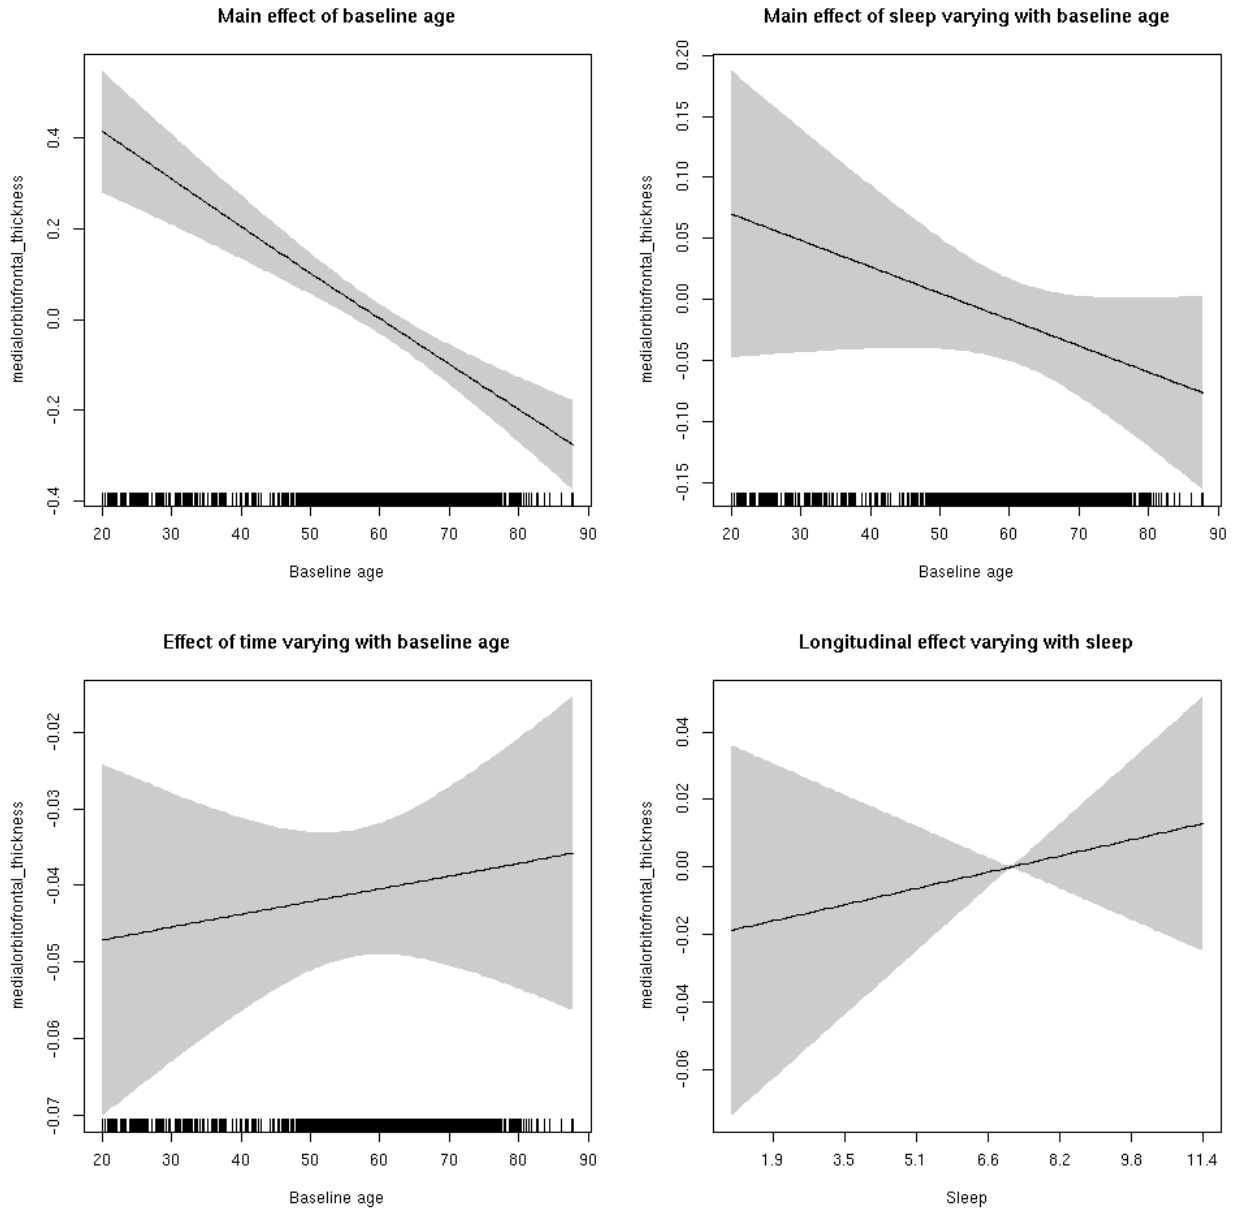

**Male: Full data** Below is the row for `s(sleep_z):time` from the model output.

```
## s(sleep_z):time  1.000  1.000  0.209  0.647
```

Below are plots of a plot of `s(bl_age)`, `s(bl_age):sleep_z`, `s(bl_age):time`, and `s(sleep_z):time`. For `s(sleep_z):time`, roughly, if we cannot fit a straight line through the confidence bands, there is evidence that the effect of time depends on sleep duration. It is correct that the confidence interval is zero at one point along the axis; this happens because we do not include the main effect.

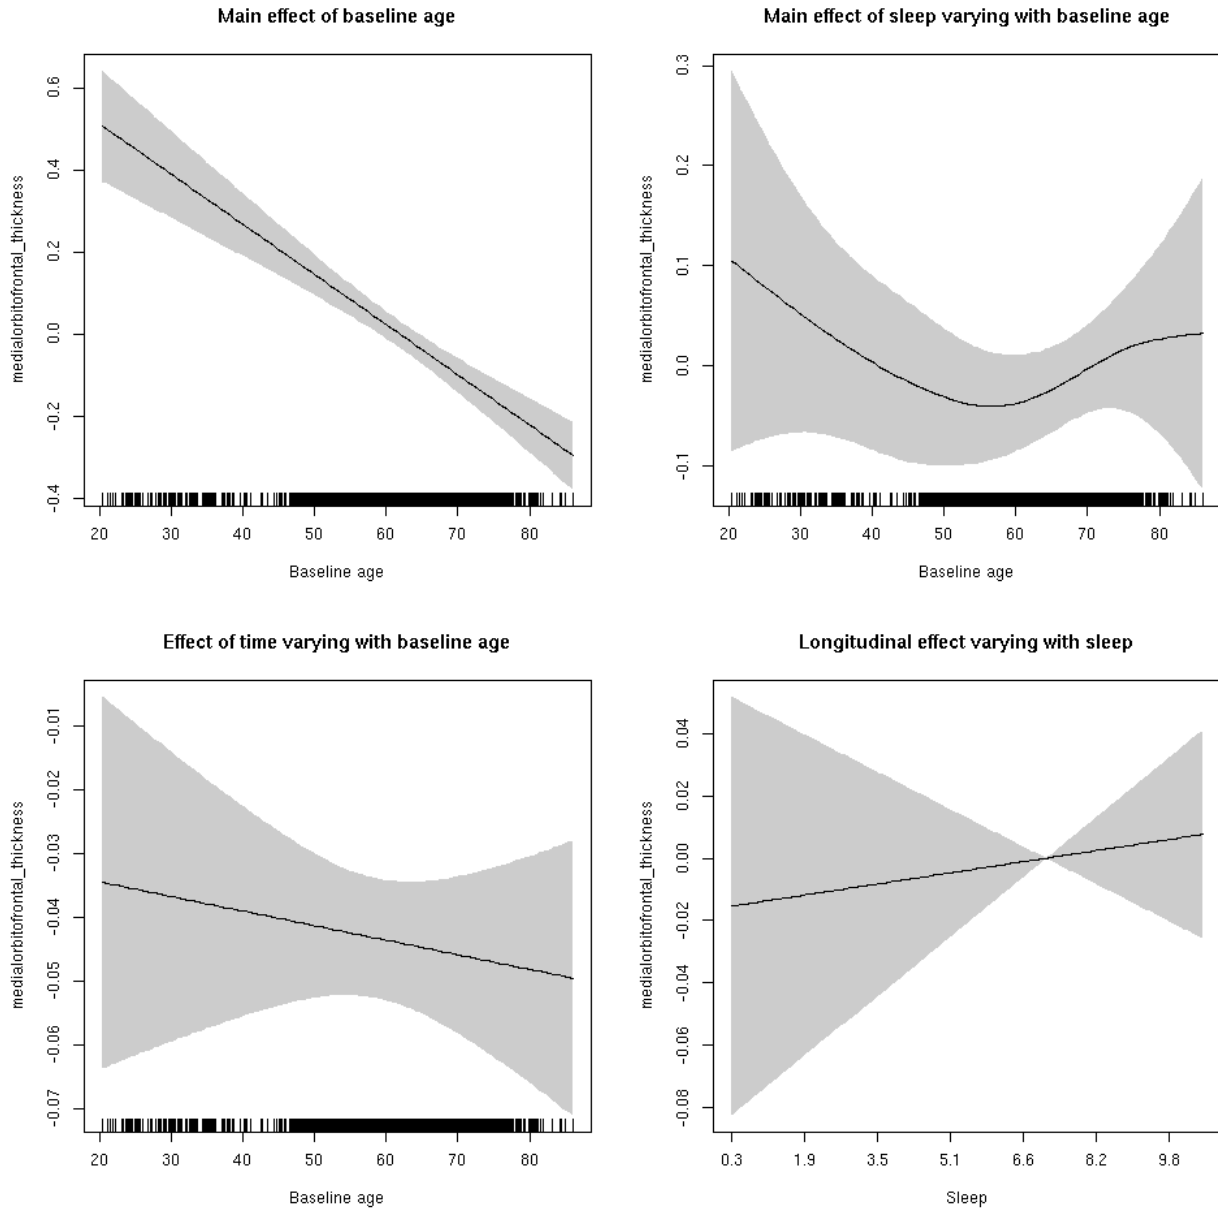

## medialorbitofrontal\_thickness

**Full data** Below is the model output. The term `s(sleep_z):time` is probably what we care most about.

```
##
## Family: gaussian
## Link function: identity
##
## Formula:
## value ~ sex + site + s(bl_age, k = 10, bs = "cr") + s(bl_age,
##   by = sleep_z, bs = "cr") + +s(bl_age, by = time, k = 5, bs = "cr") +
##   s(sleep_z, by = time, k = 5, bs = "cr", pc = 0)
## <environment: 0x5630035d88f8>
```

```

##
## Parametric coefficients:
##           Estimate Std. Error t value Pr(>|t|)
## (Intercept) -1.87753    0.04471 -41.993 < 2e-16 ***
## sexmale      0.09978    0.02296   4.345 1.41e-05 ***
## siteousAvanto 0.08178    0.06140   1.332  0.183
## siteousPrisma 0.40723    0.30136   1.351  0.177
## siteousSkyra  0.06700    0.06124   1.094  0.274
## siteUB       0.49283    0.12054   4.088 4.39e-05 ***
## siteUCAM     0.28051    0.06219   4.510 6.56e-06 ***
## siteUKB     2.10031    0.04427  47.447 < 2e-16 ***
## siteUmU     0.44557    0.07501   5.940 2.96e-09 ***
## ---
## Signif. codes:  0 '***' 0.001 '**' 0.01 '*' 0.05 '.' 0.1 ' ' 1
##
## Approximate significance of smooth terms:
##           edf Ref.df      F p-value
## s(bl_age)      1      1 102.183 <2e-16 ***
## s(bl_age):sleep_z  2      2   1.729  0.178
## s(bl_age):time    2      2  91.734 <2e-16 ***
## s(sleep_z):time    1      1   0.513  0.474
## ---
## Signif. codes:  0 '***' 0.001 '**' 0.01 '*' 0.05 '.' 0.1 ' ' 1
##
## R-sq.(adj) =  0.58
## lmer.REML = 15601 Scale est. = 0.16331 n = 8172

```

Below are plots of a plot of `s(bl_age)`, `s(bl_age):sleep_z`, `s(bl_age):time`, and `s(sleep_z):time`. For `s(sleep_z):time`, roughly, if we cannot fit a straight line through the confidence bands, there is evidence that the effect of time depends on sleep duration. It is correct that the confidence interval is zero at one point along the axis; this happens because we do not include the main effect.

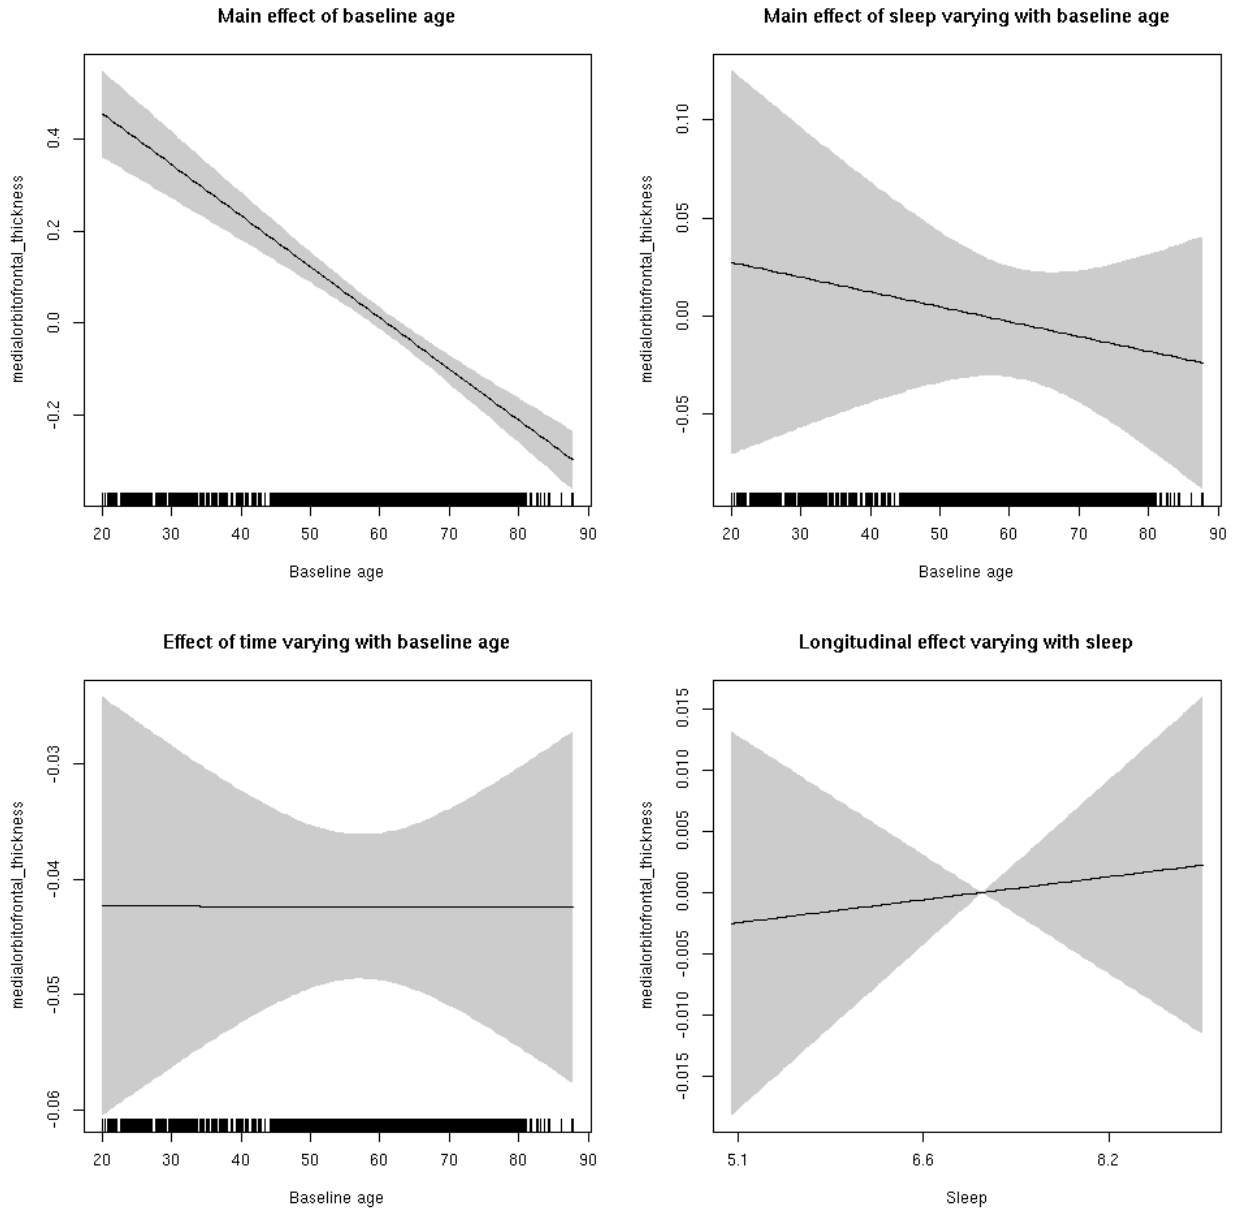

**Restricted to sleep  $\geq 5$  and  $\leq 9$  hours** Below is the row for `s(sleep_z):time` from the model output.

```
## s(sleep_z):time      1      1 0.105  0.746
```

Below are plots of a plot of `s(bl_age)`, `s(bl_age):sleep_z`, `s(bl_age):time`, and `s(sleep_z):time`. For `s(sleep_z):time`, roughly, if we cannot fit a straight line through the confidence bands, there is evidence that the effect of time depends on sleep duration. It is correct that the confidence interval is zero at one point along the axis; this happens because we do not include the main effect.





## medialorbitofrontal\_volume: Stratified by sex

**Female: Full data** Below is the row for `s(sleep_z):time` from the model output.

```
## s(sleep_z):time  1.000  1.000  0.487  0.485
```

Below are plots of a plot of `s(bl_age)`, `s(bl_age):sleep_z`, `s(bl_age):time`, and `s(sleep_z):time`. For `s(sleep_z):time`, roughly, if we cannot fit a straight line through the confidence bands, there is evidence that the effect of time depends on sleep duration. It is correct that the confidence interval is zero at one point along the axis; this happens because we do not include the main effect.

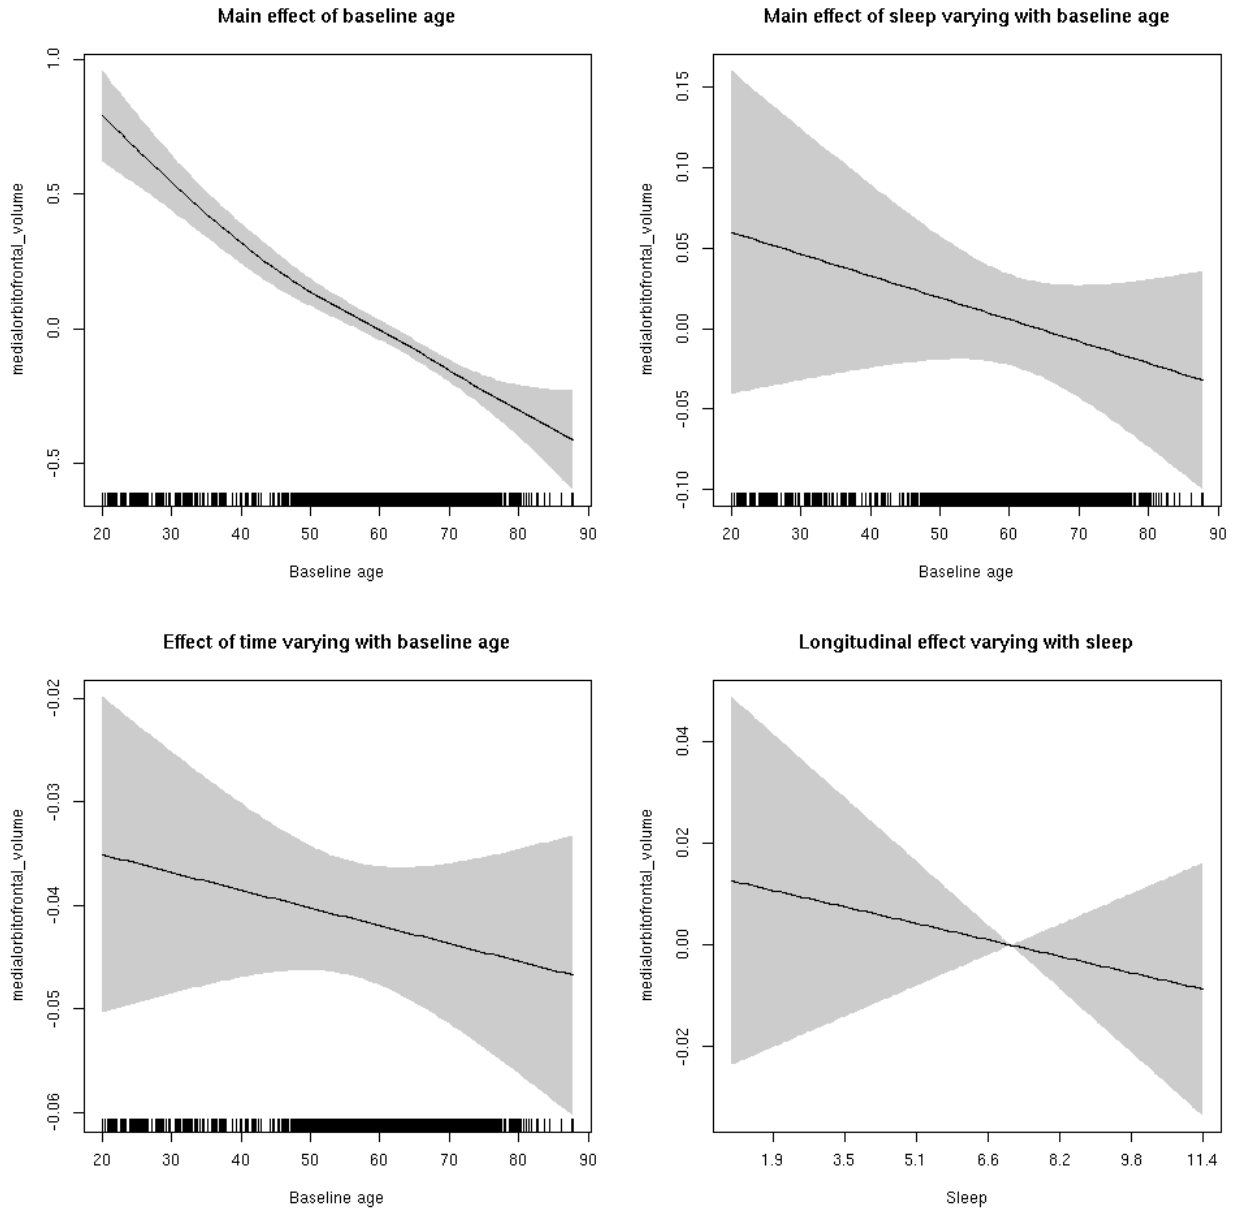

**Male: Full data** Below is the row for `s(sleep_z):time` from the model output.

```
## s(sleep_z):time  2.699  2.699  1.490  0.134
```

Below are plots of a plot of `s(bl_age)`, `s(bl_age):sleep_z`, `s(bl_age):time`, and `s(sleep_z):time`. For `s(sleep_z):time`, roughly, if we cannot fit a straight line through the confidence bands, there is evidence that the effect of time depends on sleep duration. It is correct that the confidence interval is zero at one point along the axis; this happens because we do not include the main effect.

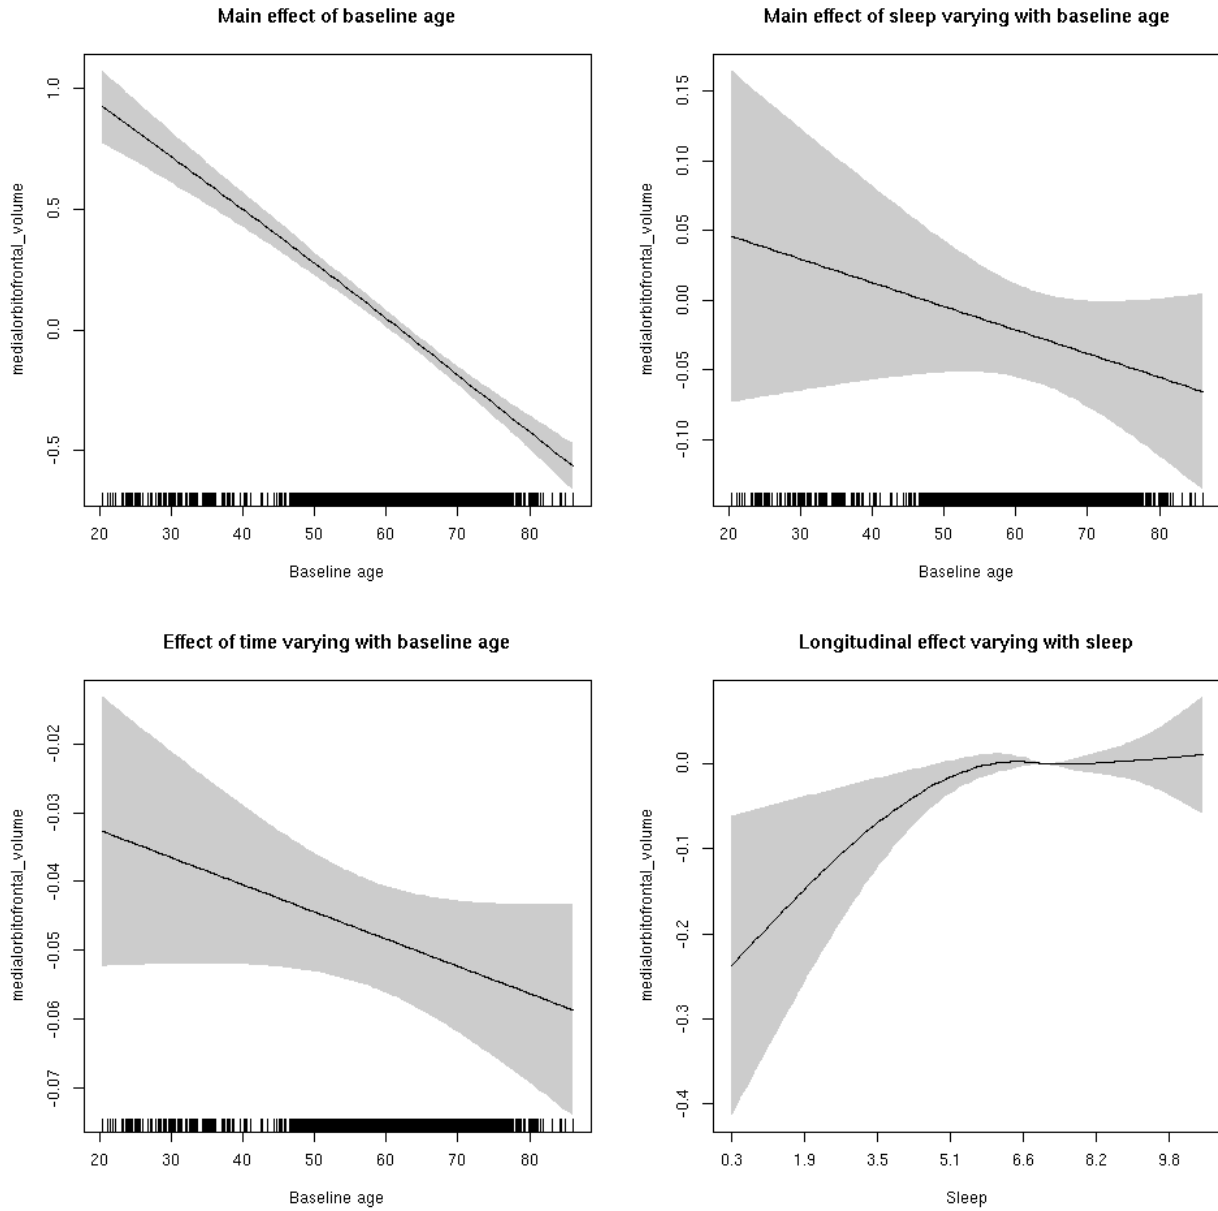

## medialorbitofrontal\_volume

**Full data** Below is the model output. The term `s(sleep_z):time` is probably what we care most about.

```
##
## Family: gaussian
## Link function: identity
##
## Formula:
## value ~ sex + site + icv + s(bl_age, k = 10, bs = "cr") + s(bl_age,
##   by = sleep_z, bs = "cr") + +s(bl_age, by = time, k = 5, bs = "cr") +
##   s(sleep_z, by = time, k = 5, bs = "cr", pc = 0)
## <environment: 0x5630035ac418>
```

```

##
## Parametric coefficients:
##           Estimate Std. Error t value Pr(>|t|)
## (Intercept) -0.68288    0.04775 -14.302 < 2e-16 ***
## sexmale      0.25063    0.02475  10.127 < 2e-16 ***
## siteousAvanto -0.16002    0.05951  -2.689  0.00718 **
## siteousPrisma -0.39236    0.20761  -1.890  0.05881 .
## siteousSkyra  0.27655    0.05750   4.809  1.54e-06 ***
## siteUB       -0.07246    0.10976  -0.660  0.50916
## siteUCAM     -0.29295    0.05929  -4.941  7.93e-07 ***
## siteUKB      0.78923    0.04442  17.769 < 2e-16 ***
## siteUmU      0.56902    0.06832   8.329 < 2e-16 ***
## icv          0.54327    0.01225  44.336 < 2e-16 ***
## ---
## Signif. codes:  0 '***' 0.001 '**' 0.01 '*' 0.05 '.' 0.1 ' ' 1
##
## Approximate significance of smooth terms:
##           edf Ref.df      F p-value
## s(bl_age)      1      1 418.674 <2e-16 ***
## s(bl_age):sleep_z  2      2   2.846  0.0581 .
## s(bl_age):time    2      2 233.593 <2e-16 ***
## s(sleep_z):time   1      1   0.059  0.8085
## ---
## Signif. codes:  0 '***' 0.001 '**' 0.01 '*' 0.05 '.' 0.1 ' ' 1
##
## R-sq.(adj) =  0.599
## lmer.REML = 11101 Scale est. = 0.070002 n = 8174

```

Below are plots of a plot of `s(bl_age)`, `s(bl_age):sleep_z`, `s(bl_age):time`, and `s(sleep_z):time`. For `s(sleep_z):time`, roughly, if we cannot fit a straight line through the confidence bands, there is evidence that the effect of time depends on sleep duration. It is correct that the confidence interval is zero at one point along the axis; this happens because we do not include the main effect.

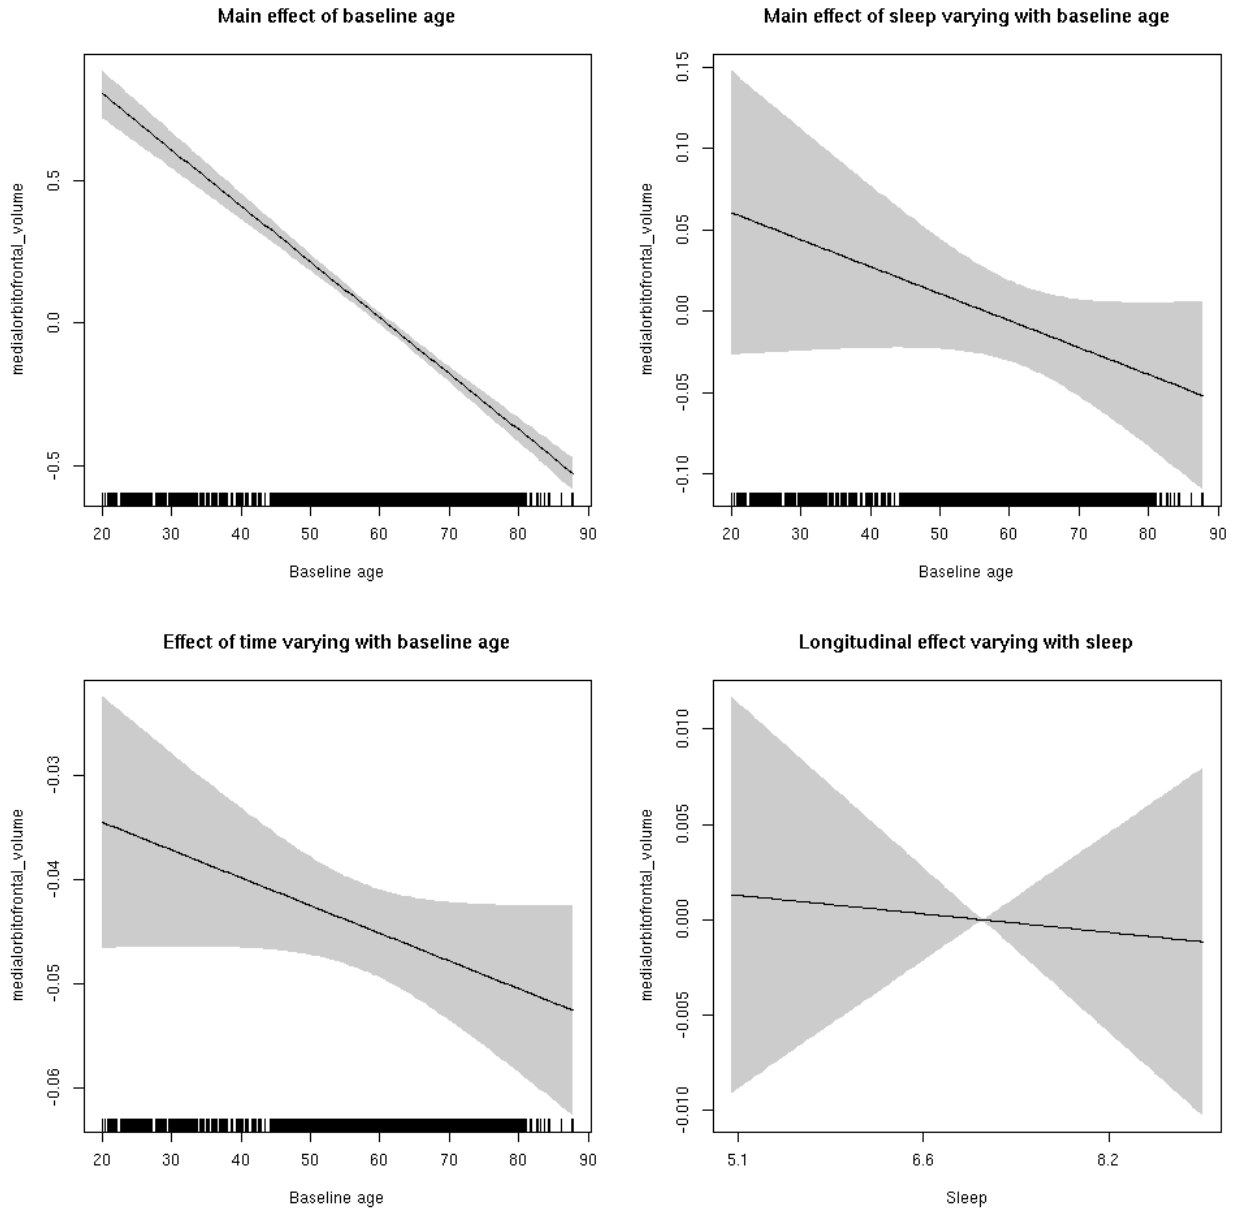

**Restricted to sleep  $\geq 5$  and  $\leq 9$  hours** Below is the row for `s(sleep_z):time` from the model output.

```
## s(sleep_z):time      1      1  0.064   0.8
```

Below are plots of a plot of `s(bl_age)`, `s(bl_age):sleep_z`, `s(bl_age):time`, and `s(sleep_z):time`. For `s(sleep_z):time`, roughly, if we cannot fit a straight line through the confidence bands, there is evidence that the effect of time depends on sleep duration. It is correct that the confidence interval is zero at one point along the axis; this happens because we do not include the main effect.



## middletemporal\_area: Stratified by sex

**Female: Full data** Below is the row for `s(sleep_z):time` from the model output.

```
## s(sleep_z):time  1.000  1.000  1.223  0.269
```

Below are plots of a plot of `s(bl_age)`, `s(bl_age):sleep_z`, `s(bl_age):time`, and `s(sleep_z):time`. For `s(sleep_z):time`, roughly, if we cannot fit a straight line through the confidence bands, there is evidence that the effect of time depends on sleep duration. It is correct that the confidence interval is zero at one point along the axis; this happens because we do not include the main effect.

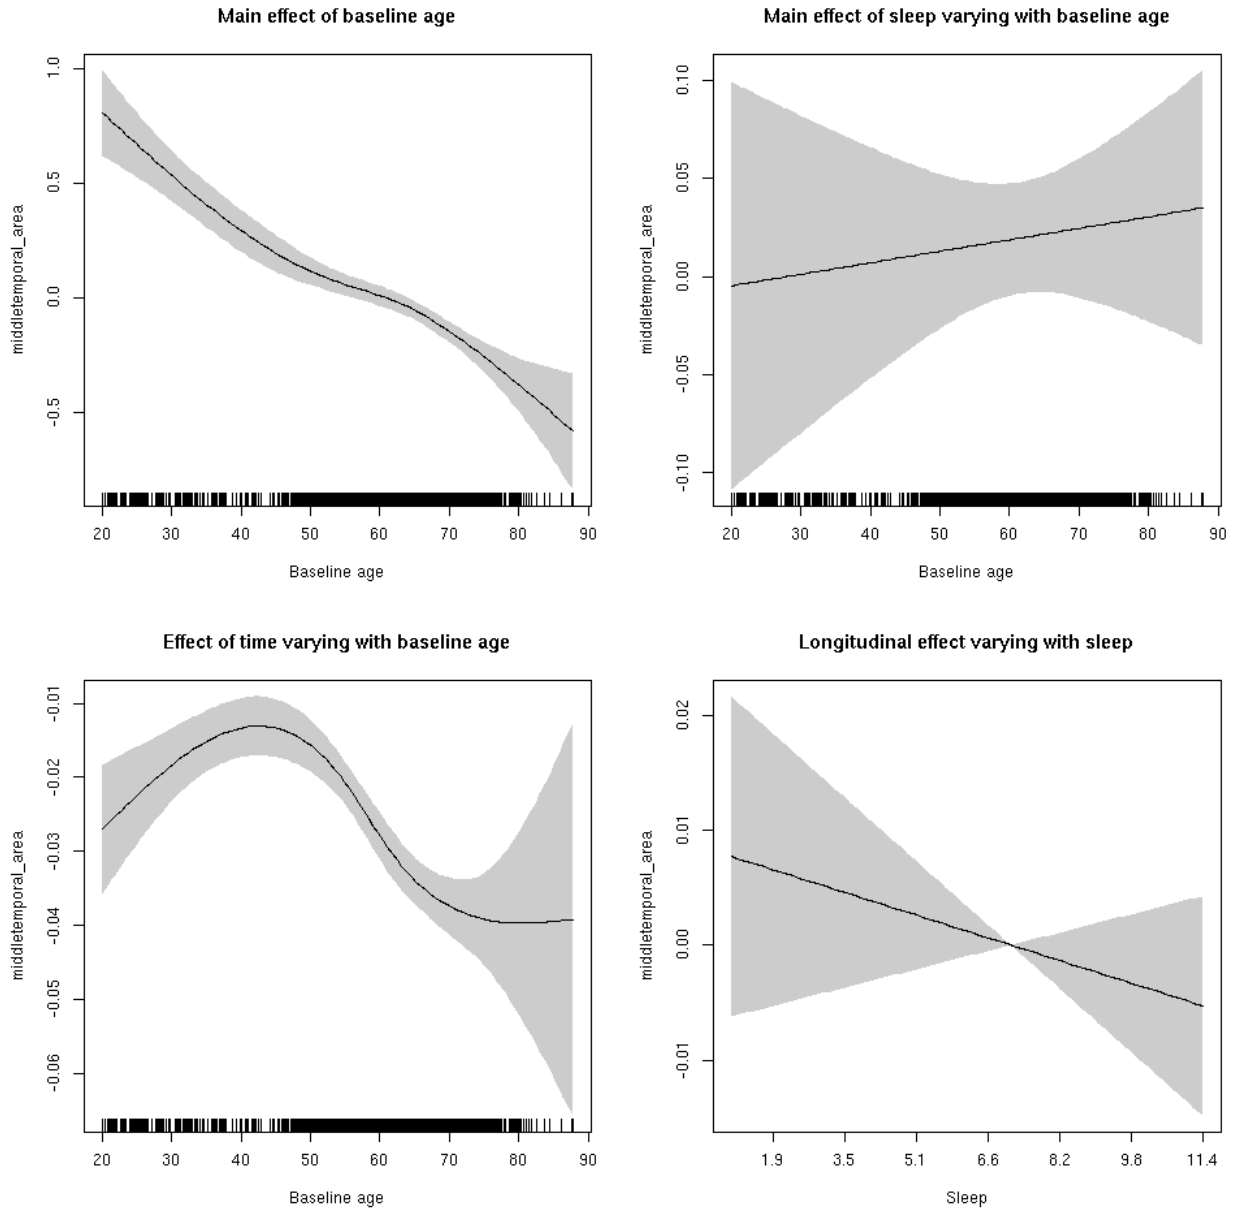

**Male: Full data** Below is the row for `s(sleep_z):time` from the model output.

```
## s(sleep_z):time  1.000  1.000  1.247  0.264
```

Below are plots of a plot of `s(bl_age)`, `s(bl_age):sleep_z`, `s(bl_age):time`, and `s(sleep_z):time`. For `s(sleep_z):time`, roughly, if we cannot fit a straight line through the confidence bands, there is evidence that the effect of time depends on sleep duration. It is correct that the confidence interval is zero at one point along the axis; this happens because we do not include the main effect.

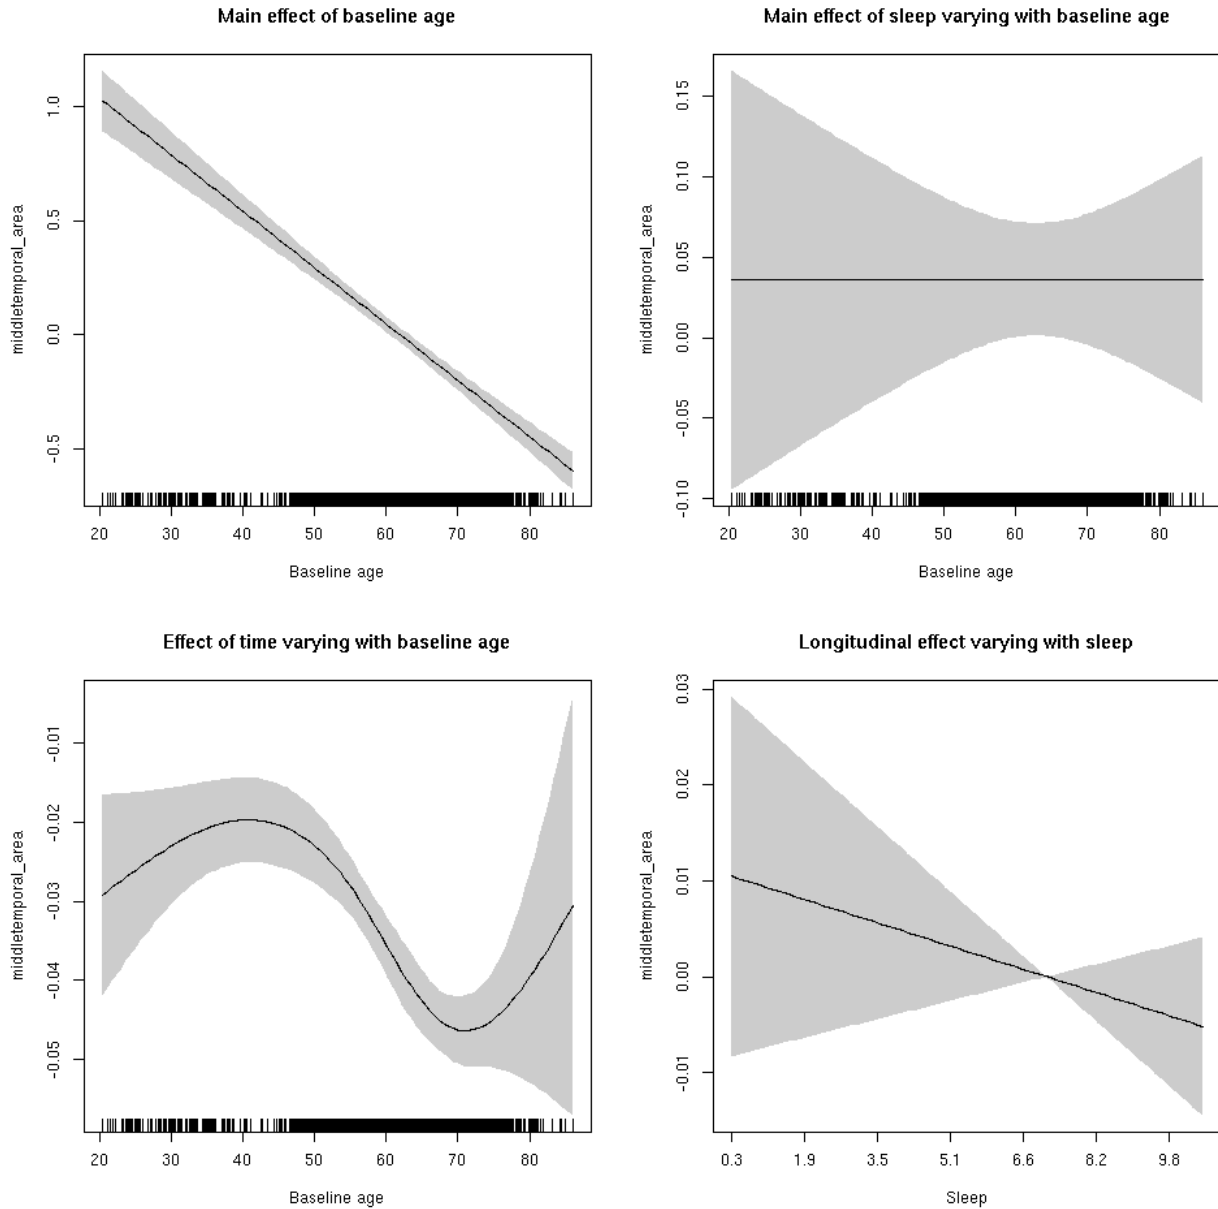

## middletemporal\_area

**Full data** Below is the model output. The term `s(sleep_z):time` is probably what we care most about.

```
##
## Family: gaussian
## Link function: identity
##
## Formula:
## value ~ sex + site + icv + s(bl_age, k = 10, bs = "cr") + s(bl_age,
##   by = sleep_z, bs = "cr") + +s(bl_age, by = time, k = 5, bs = "cr") +
##   s(sleep_z, by = time, k = 5, bs = "cr", pc = 0)
## <environment: 0x5630035abbc8>
```



```

##
## Parametric coefficients:
##           Estimate Std. Error t value Pr(>|t|)
## (Intercept)  0.83524    0.05104  16.363 < 2e-16 ***
## sexmale      0.21346    0.02621   8.144 4.40e-16 ***
## siteousAvanto -0.68254    0.06220 -10.974 < 2e-16 ***
## siteousPrisma -1.12136    0.10292 -10.896 < 2e-16 ***
## siteousSkyra  -0.17257    0.06030  -2.862 0.00422 **
## siteUB       -0.87933    0.11863  -7.412 1.37e-13 ***
## siteUCAM     -0.79598    0.06368 -12.500 < 2e-16 ***
## siteUKB      -0.91577    0.04863 -18.832 < 2e-16 ***
## siteUmU      -0.06206    0.07330  -0.847 0.39718
## icv          0.58613    0.01266  46.312 < 2e-16 ***
## ---
## Signif. codes:  0 '***' 0.001 '**' 0.01 '*' 0.05 '.' 0.1 ' ' 1
##
## Approximate significance of smooth terms:
##           edf Ref.df      F p-value
## s(bl_age)      3.225  3.225 128.564 <2e-16 ***
## s(bl_age):sleep_z 2.000  2.000   2.236  0.107
## s(bl_age):time  4.475  4.475 335.390 <2e-16 ***
## s(sleep_z):time  1.000  1.000   2.627  0.105
## ---
## Signif. codes:  0 '***' 0.001 '**' 0.01 '*' 0.05 '.' 0.1 ' ' 1
##
## R-sq.(adj) =  0.563
## lmer.REML = 3663.1  Scale est. = 0.01082  n = 8164

```

Below are plots of a plot of  $s(\text{bl\_age})$ ,  $s(\text{bl\_age}):\text{sleep\_z}$ ,  $s(\text{bl\_age}):\text{time}$ , and  $s(\text{sleep\_z}):\text{time}$ . For  $s(\text{sleep\_z}):\text{time}$ , roughly, if we cannot fit a straight line through the confidence bands, there is evidence that the effect of time depends on sleep duration. It is correct that the confidence interval is zero at one point along the axis; this happens because we do not include the main effect.

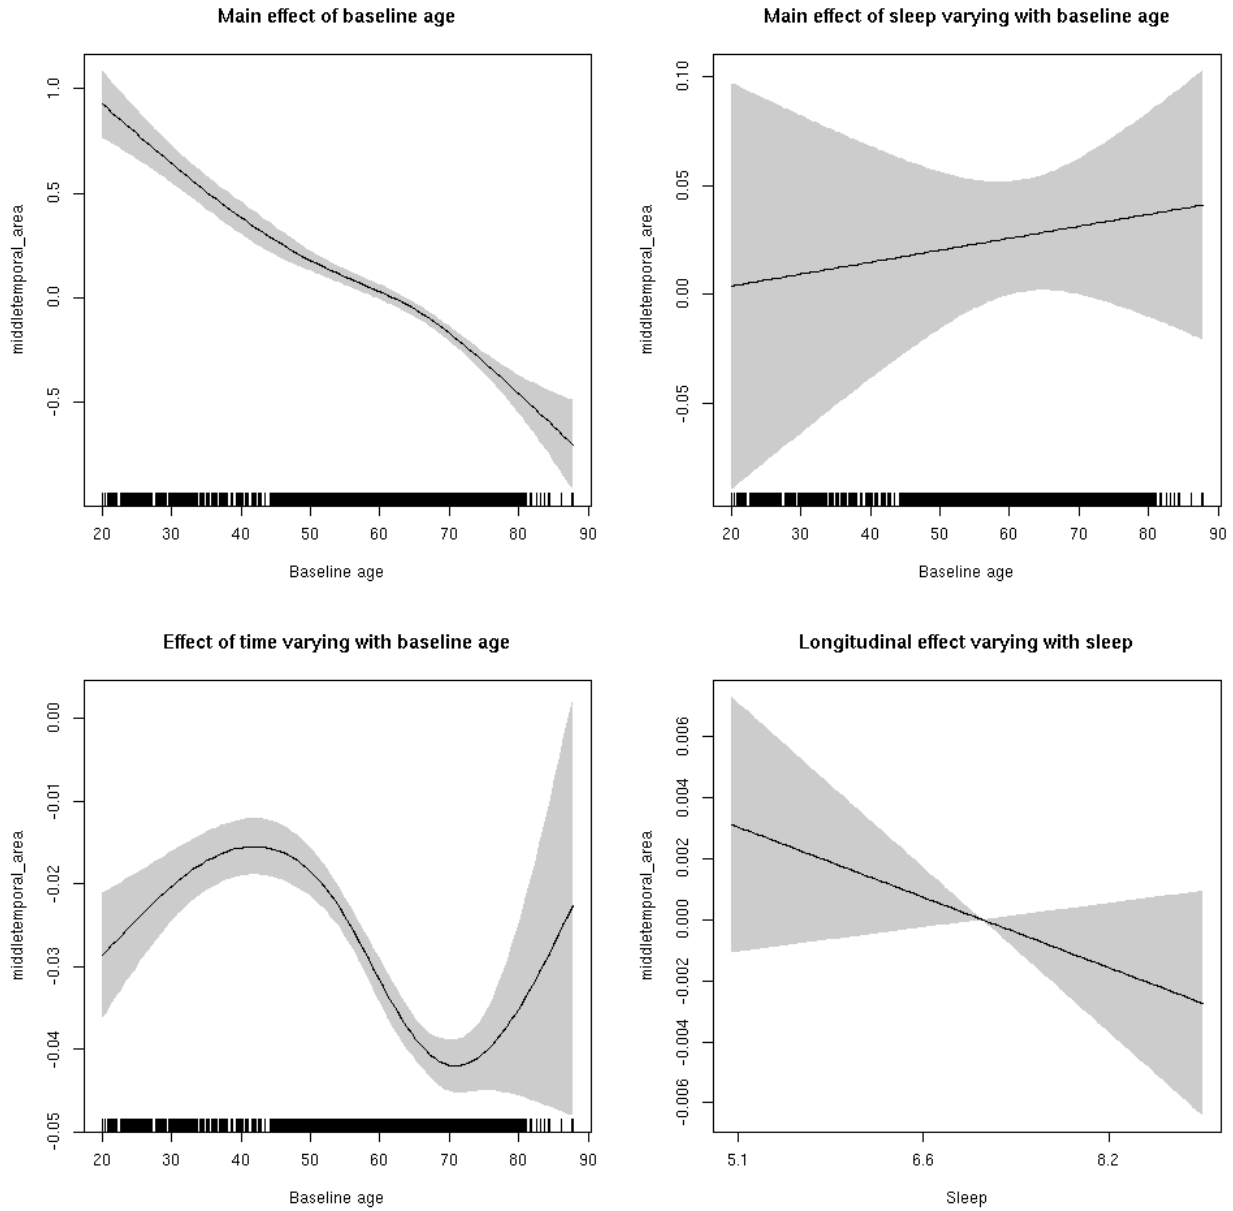

**Restricted to sleep  $\geq 5$  and  $\leq 9$  hours** Below is the row for `s(sleep_z):time` from the model output.

```
## s(sleep_z):time  1.000  1.000  2.209  0.137
```

Below are plots of a plot of `s(bl_age)`, `s(bl_age):sleep_z`, `s(bl_age):time`, and `s(sleep_z):time`. For `s(sleep_z):time`, roughly, if we cannot fit a straight line through the confidence bands, there is evidence that the effect of time depends on sleep duration. It is correct that the confidence interval is zero at one point along the axis; this happens because we do not include the main effect.



### middletemporal\_thickness: Stratified by sex

**Female: Full data** Below is the row for `s(sleep_z):time` from the model output.

```
## s(sleep_z):time  1.000  1.000  3.034  0.0816 .
```

Below are plots of a plot of `s(bl_age)`, `s(bl_age):sleep_z`, `s(bl_age):time`, and `s(sleep_z):time`. For `s(sleep_z):time`, roughly, if we cannot fit a straight line through the confidence bands, there is evidence that the effect of time depends on sleep duration. It is correct that the confidence interval is zero at one point along the axis; this happens because we do not include the main effect.

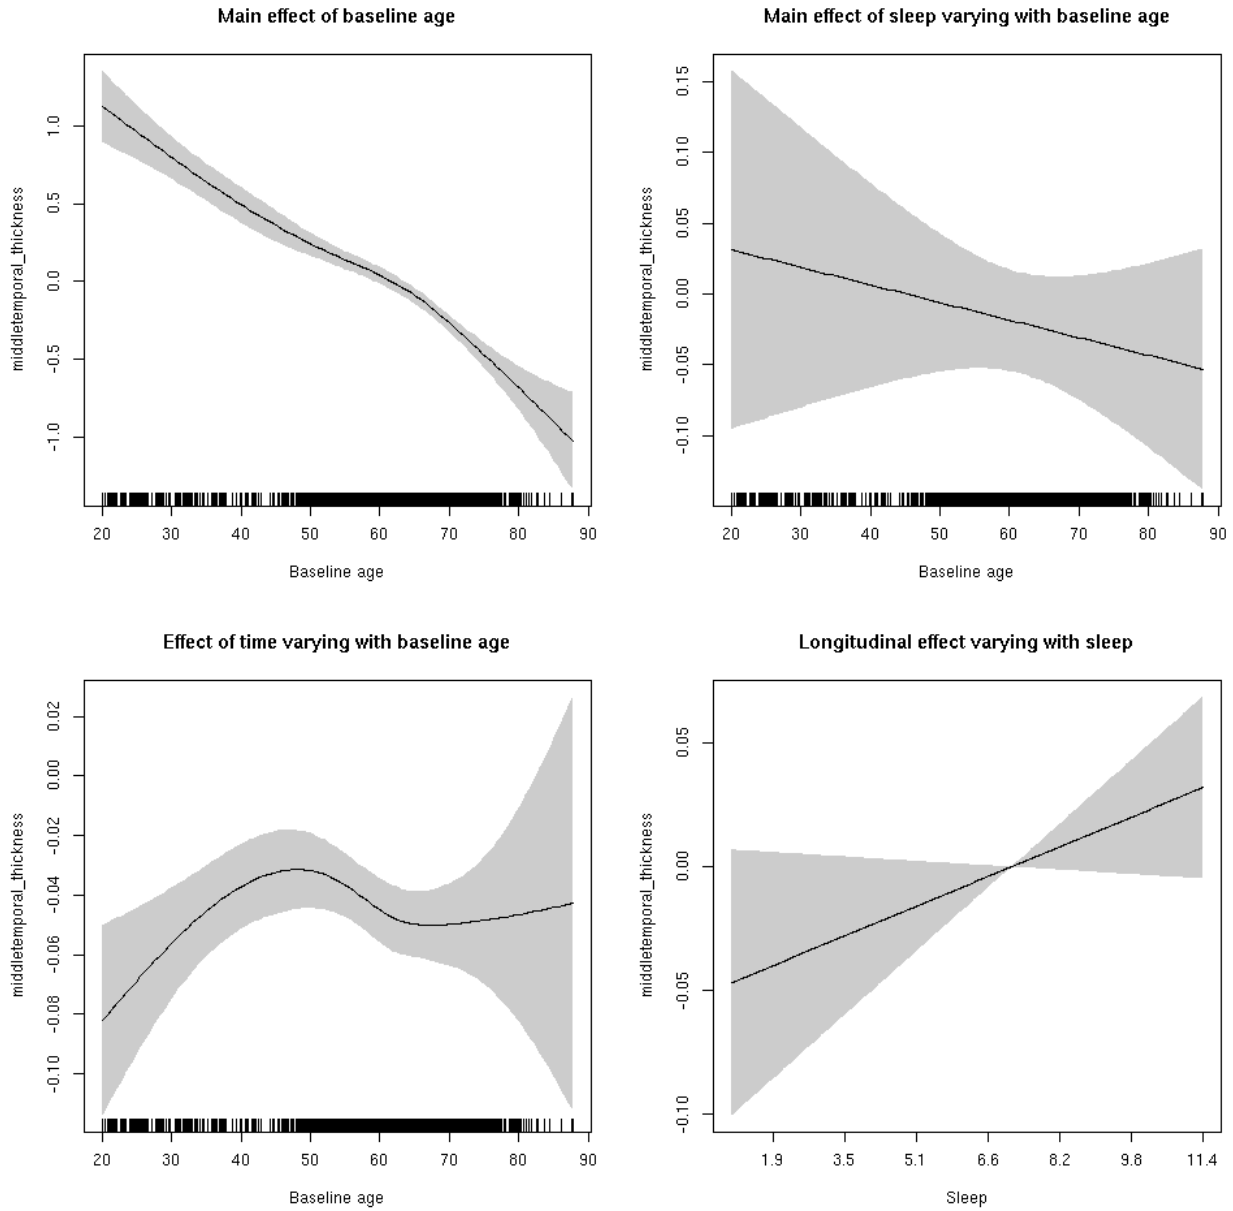

**Male: Full data** Below is the row for `s(sleep_z):time` from the model output.

```
## s(sleep_z):time  1.000  1.000  0.072  0.788
```

Below are plots of a plot of `s(bl_age)`, `s(bl_age):sleep_z`, `s(bl_age):time`, and `s(sleep_z):time`. For `s(sleep_z):time`, roughly, if we cannot fit a straight line through the confidence bands, there is evidence that the effect of time depends on sleep duration. It is correct that the confidence interval is zero at one point along the axis; this happens because we do not include the main effect.

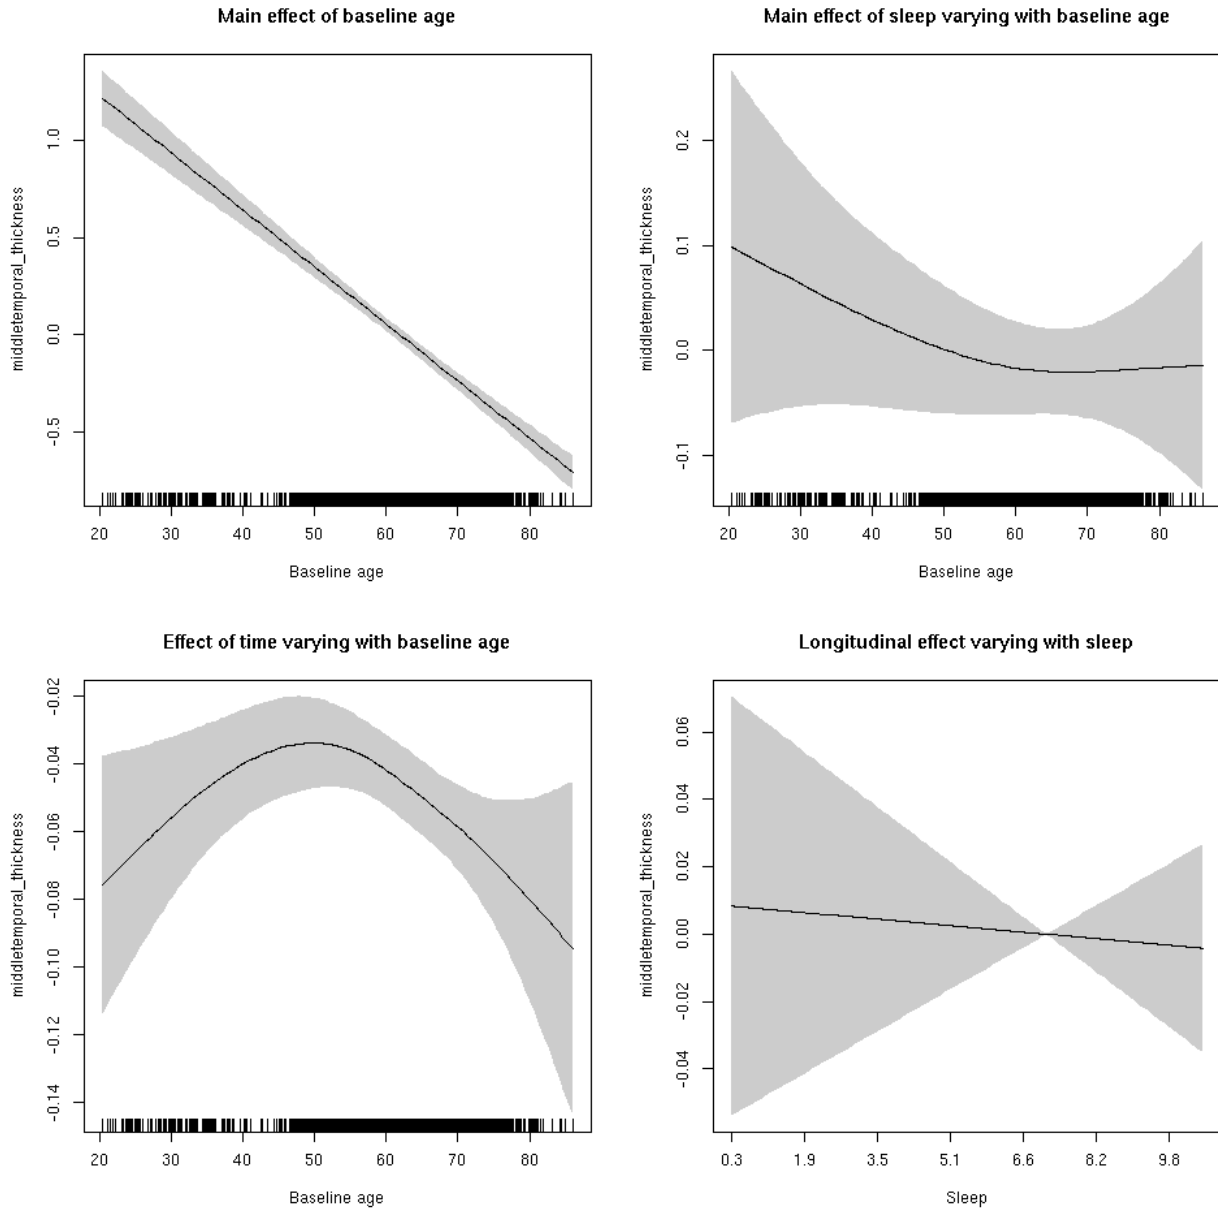

## middletemporal\_thickness

**Full data** Below is the model output. The term `s(sleep_z):time` is probably what we care most about.

```
##
## Family: gaussian
## Link function: identity
##
## Formula:
## value ~ sex + site + s(bl_age, k = 10, bs = "cr") + s(bl_age,
##   by = sleep_z, bs = "cr") + +s(bl_age, by = time, k = 5, bs = "cr") +
##   s(sleep_z, by = time, k = 5, bs = "cr", pc = 0)
## <environment: 0x5630035d29a0>
```

```

##
## Parametric coefficients:
##           Estimate Std. Error t value Pr(>|t|)
## (Intercept) -1.68294    0.04873 -34.537 < 2e-16 ***
## sexmale      0.18960    0.02446   7.751 1.02e-14 ***
## siteousAvanto 0.27247    0.06496   4.195 2.76e-05 ***
## siteousPrisma 0.54618    0.28752   1.900 0.05752 .
## siteousSkyra  0.43431    0.06492   6.690 2.38e-11 ***
## siteUB       0.52805    0.12926   4.085 4.45e-05 ***
## siteUCAM     0.59762    0.06702   8.917 < 2e-16 ***
## siteUKB      1.84798    0.04932  37.473 < 2e-16 ***
## siteUmU     -0.25997    0.08040  -3.233 0.00123 **
## ---
## Signif. codes:  0 '***' 0.001 '**' 0.01 '*' 0.05 '.' 0.1 ' ' 1
##
## Approximate significance of smooth terms:
##           edf Ref.df      F p-value
## s(bl_age)      3.165  3.165 193.153 <2e-16 ***
## s(bl_age):sleep_z 2.000  2.000   1.807  0.164
## s(bl_age):time  3.797  3.797  72.400 <2e-16 ***
## s(sleep_z):time 1.000  1.000   1.437  0.231
## ---
## Signif. codes:  0 '***' 0.001 '**' 0.01 '*' 0.05 '.' 0.1 ' ' 1
##
## R-sq.(adj) =  0.486
## lmer.REML = 15545  Scale est. = 0.14353  n = 8170

```

Below are plots of a plot of `s(bl_age)`, `s(bl_age):sleep_z`, `s(bl_age):time`, and `s(sleep_z):time`. For `s(sleep_z):time`, roughly, if we cannot fit a straight line through the confidence bands, there is evidence that the effect of time depends on sleep duration. It is correct that the confidence interval is zero at one point along the axis; this happens because we do not include the main effect.

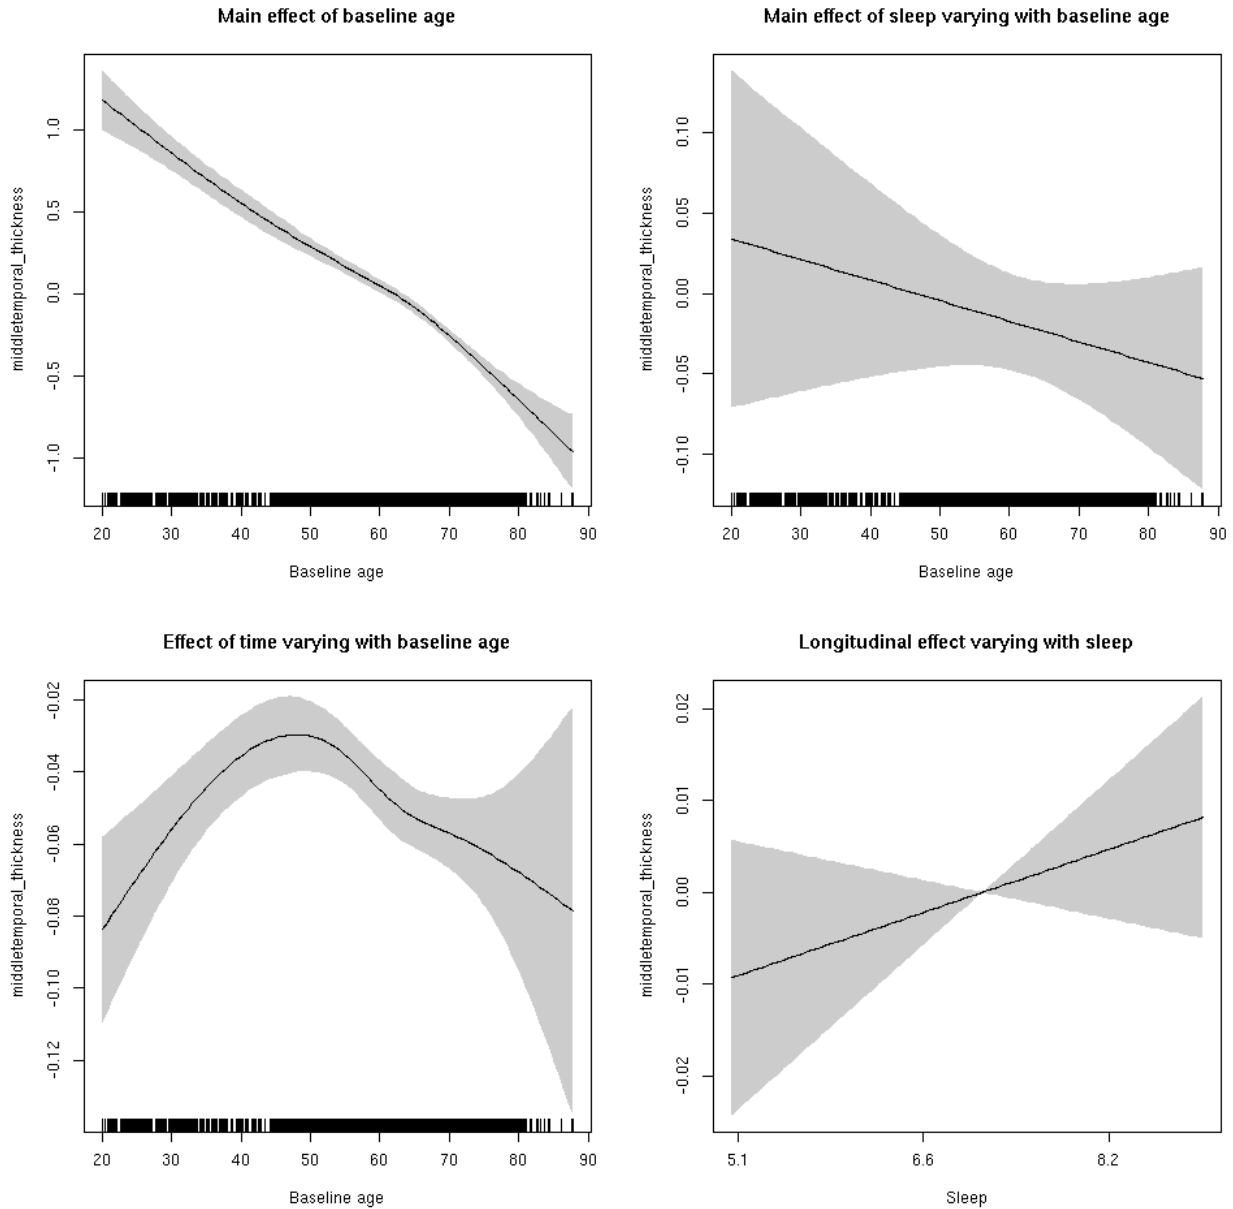

**Restricted to sleep  $\geq 5$  and  $\leq 9$  hours** Below is the row for `s(sleep_z):time` from the model output.

```
## s(sleep_z):time  1.000  1.000  1.535  0.215
```

Below are plots of a plot of `s(bl_age)`, `s(bl_age):sleep_z`, `s(bl_age):time`, and `s(sleep_z):time`. For `s(sleep_z):time`, roughly, if we cannot fit a straight line through the confidence bands, there is evidence that the effect of time depends on sleep duration. It is correct that the confidence interval is zero at one point along the axis; this happens because we do not include the main effect.



## middletemporal\_volume: Stratified by sex

**Female: Full data** Below is the row for `s(sleep_z):time` from the model output.

```
## s(sleep_z):time  1.000  1.000  0.006  0.939
```

Below are plots of a plot of `s(bl_age)`, `s(bl_age):sleep_z`, `s(bl_age):time`, and `s(sleep_z):time`. For `s(sleep_z):time`, roughly, if we cannot fit a straight line through the confidence bands, there is evidence that the effect of time depends on sleep duration. It is correct that the confidence interval is zero at one point along the axis; this happens because we do not include the main effect.



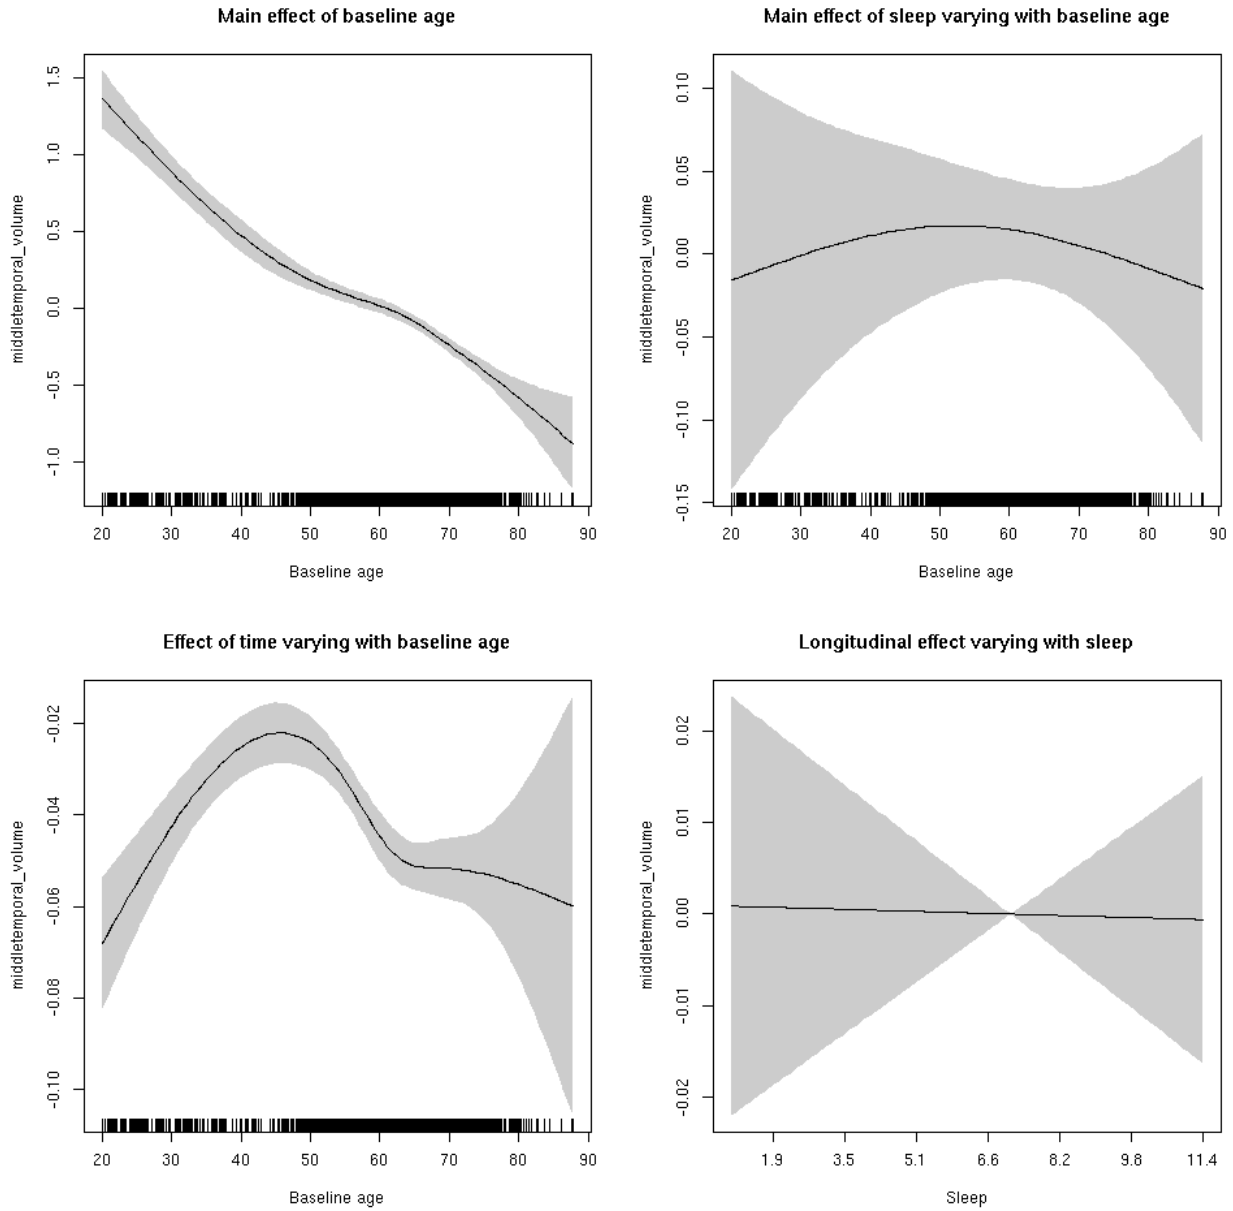

**Male: Full data** Below is the row for `s(sleep_z):time` from the model output.

```
## s(sleep_z):time  1.000  1.000  0.280  0.597
```

Below are plots of a plot of `s(bl_age)`, `s(bl_age):sleep_z`, `s(bl_age):time`, and `s(sleep_z):time`. For `s(sleep_z):time`, roughly, if we cannot fit a straight line through the confidence bands, there is evidence that the effect of time depends on sleep duration. It is correct that the confidence interval is zero at one point along the axis; this happens because we do not include the main effect.

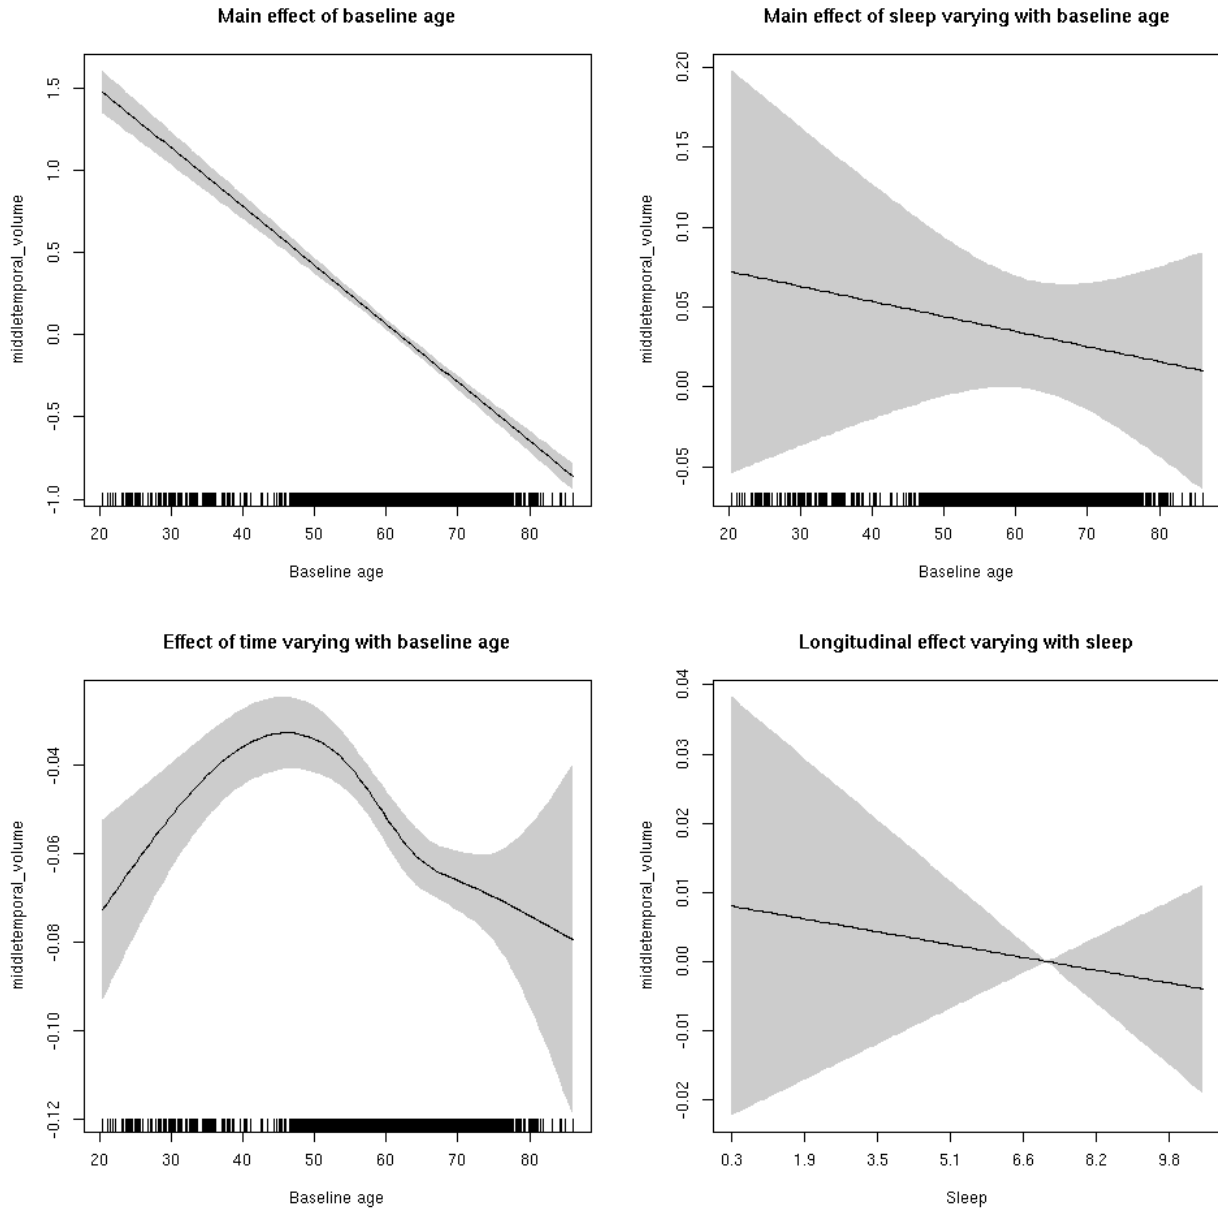

## middletemporal\_volume

**Full data** Below is the model output. The term `s(sleep_z):time` is probably what we care most about.

```
##
## Family: gaussian
## Link function: identity
##
## Formula:
## value ~ sex + site + icv + s(bl_age, k = 10, bs = "cr") + s(bl_age,
##   by = sleep_z, bs = "cr") + +s(bl_age, by = time, k = 5, bs = "cr") +
##   s(sleep_z, by = time, k = 5, bs = "cr", pc = 0)
## <environment: 0x5630035a6d80>
```

```

##
## Parametric coefficients:
##           Estimate Std. Error t value Pr(>|t|)
## (Intercept) -0.04284    0.04985  -0.859  0.3902
## sexmale      0.25069    0.02558   9.800 < 2e-16 ***
## siteousAvanto -0.52696    0.06084  -8.662 < 2e-16 ***
## siteousPrisma -0.62904    0.14445  -4.355 1.35e-05 ***
## siteousSkyra  0.07473    0.05891   1.269  0.2046
## siteUB       -0.45708    0.11464  -3.987 6.75e-05 ***
## siteUCAM     -0.41830    0.06200  -6.747 1.61e-11 ***
## siteUKB      0.09437    0.04742   1.990  0.0466 *
## siteUmU     -0.04780    0.07109  -0.672  0.5014
## icv          0.54790    0.01259  43.513 < 2e-16 ***
## ---
## Signif. codes:  0 '***' 0.001 '**' 0.01 '*' 0.05 '.' 0.1 ' ' 1
##
## Approximate significance of smooth terms:
##           edf Ref.df      F p-value
## s(bl_age)      3.804  3.804 266.772 <2e-16 ***
## s(bl_age):sleep_z 2.000  2.000   1.229   0.293
## s(bl_age):time  4.512  4.512 294.894 <2e-16 ***
## s(sleep_z):time  1.000  1.000   0.157   0.692
## ---
## Signif. codes:  0 '***' 0.001 '**' 0.01 '*' 0.05 '.' 0.1 ' ' 1
##
## R-sq.(adj) =  0.575
## lmer.REML = 7606.8  Scale est. = 0.028894  n = 8172

```

Below are plots of a plot of `s(bl_age)`, `s(bl_age):sleep_z`, `s(bl_age):time`, and `s(sleep_z):time`. For `s(sleep_z):time`, roughly, if we cannot fit a straight line through the confidence bands, there is evidence that the effect of time depends on sleep duration. It is correct that the confidence interval is zero at one point along the axis; this happens because we do not include the main effect.

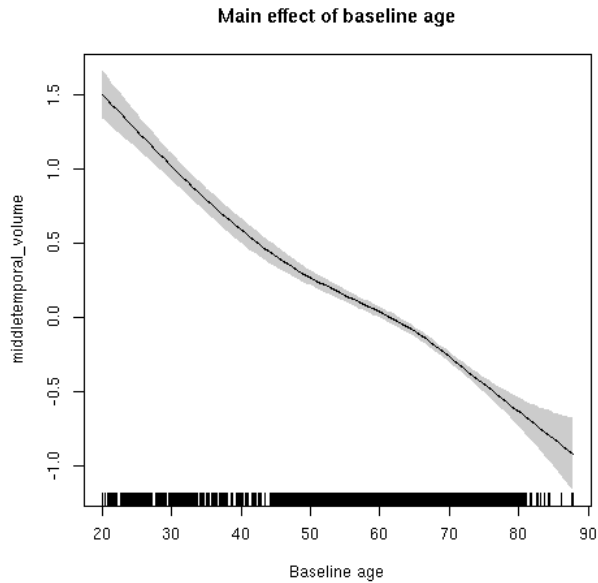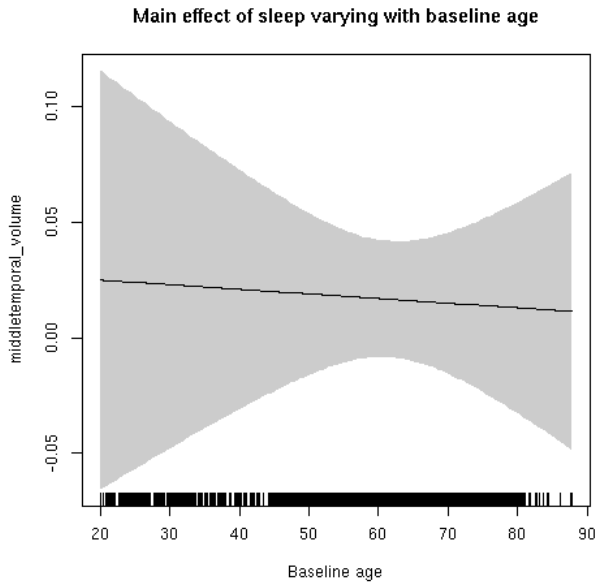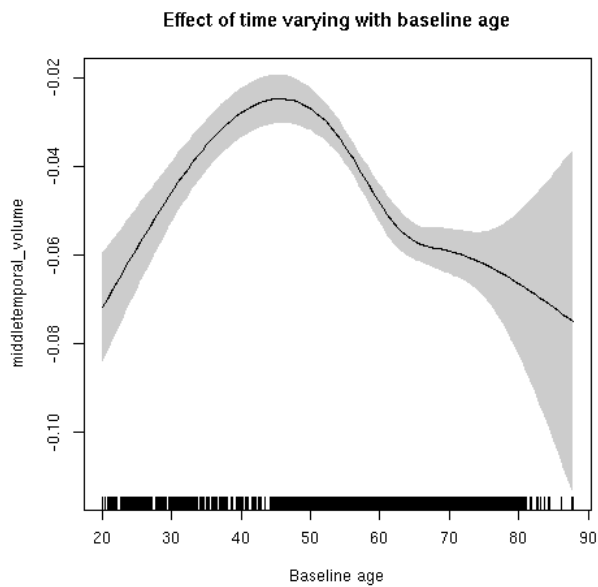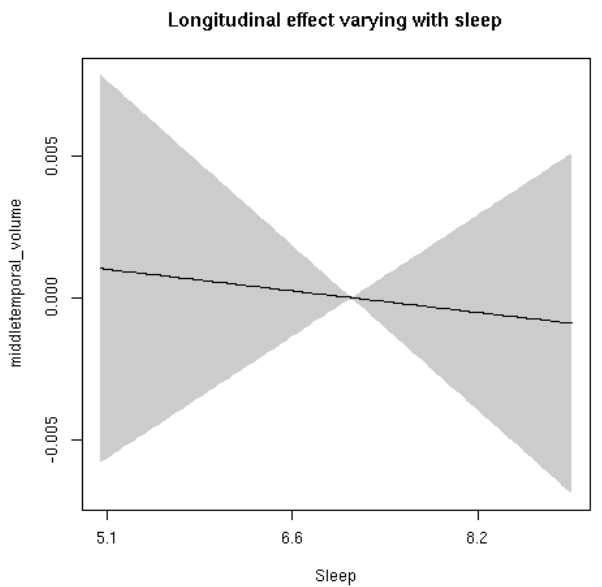

**Restricted to sleep  $\geq 5$  and  $\leq 9$  hours** Below is the row for `s(sleep_z):time` from the model output.

```
## s(sleep_z):time  1.000  1.000  0.090  0.764
```

Below are plots of a plot of `s(bl_age)`, `s(bl_age):sleep_z`, `s(bl_age):time`, and `s(sleep_z):time`. For `s(sleep_z):time`, roughly, if we cannot fit a straight line through the confidence bands, there is evidence that the effect of time depends on sleep duration. It is correct that the confidence interval is zero at one point along the axis; this happens because we do not include the main effect.

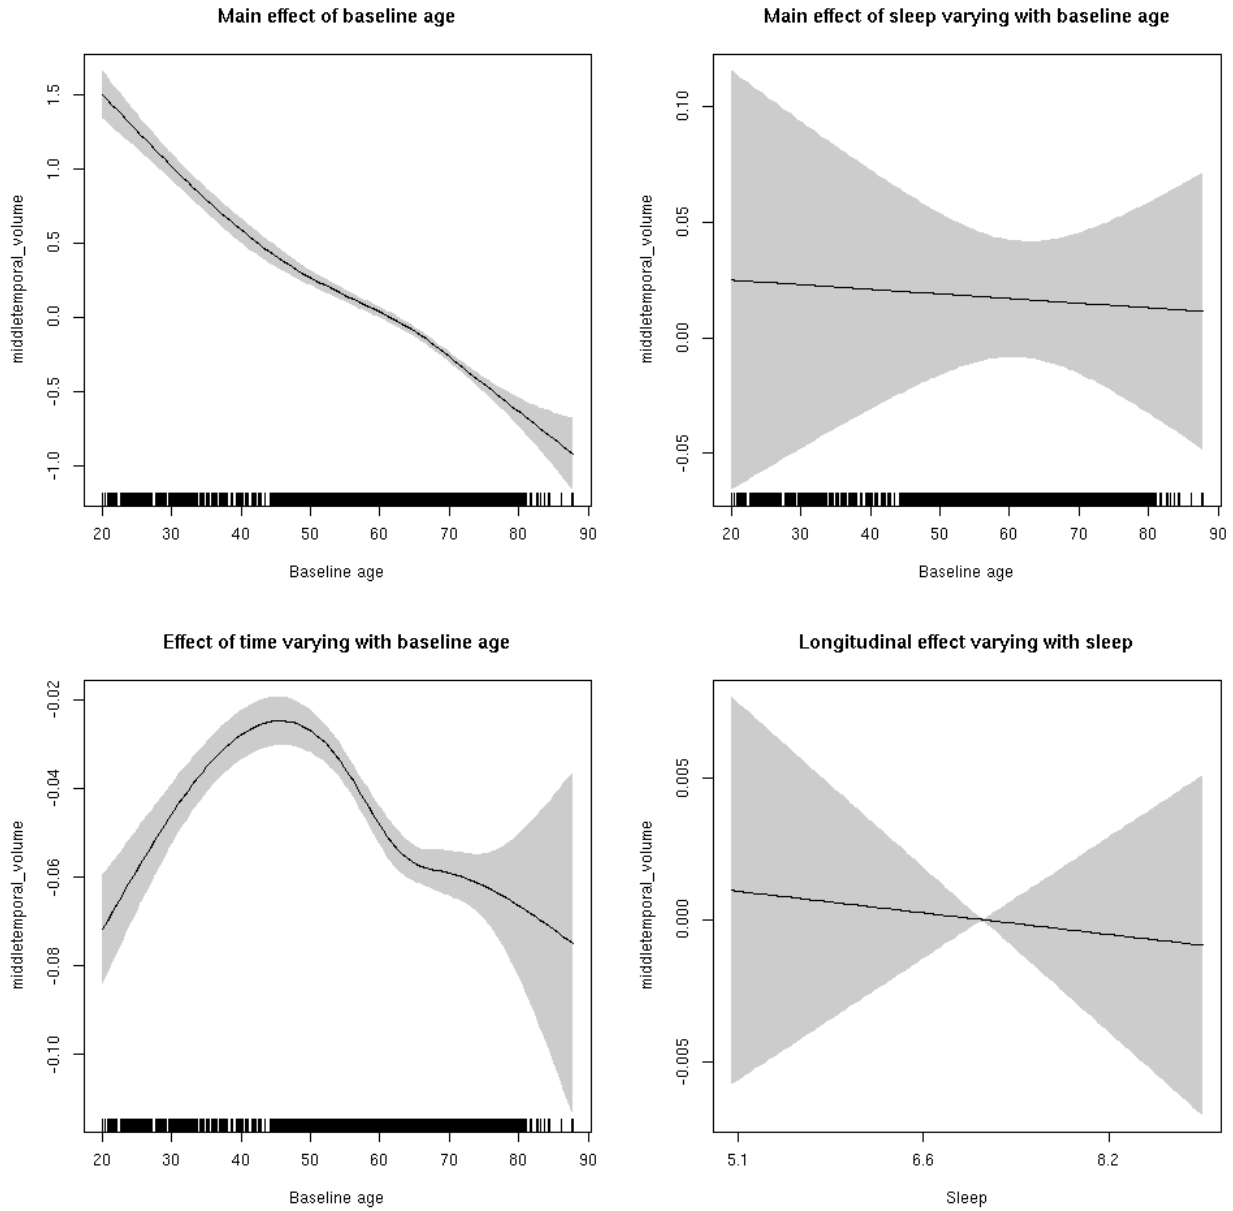

**paracentral\_area: Stratified by sex**

**Female: Full data** Below is the row for `s(sleep_z):time` from the model output.

```
## s(sleep_z):time  1.000  1.000  0.158  0.69097
```

Below are plots of a plot of `s(bl_age)`, `s(bl_age):sleep_z`, `s(bl_age):time`, and `s(sleep_z):time`. For `s(sleep_z):time`, roughly, if we cannot fit a straight line through the confidence bands, there is evidence that the effect of time depends on sleep duration. It is correct that the confidence interval is zero at one point along the axis; this happens because we do not include the main effect.

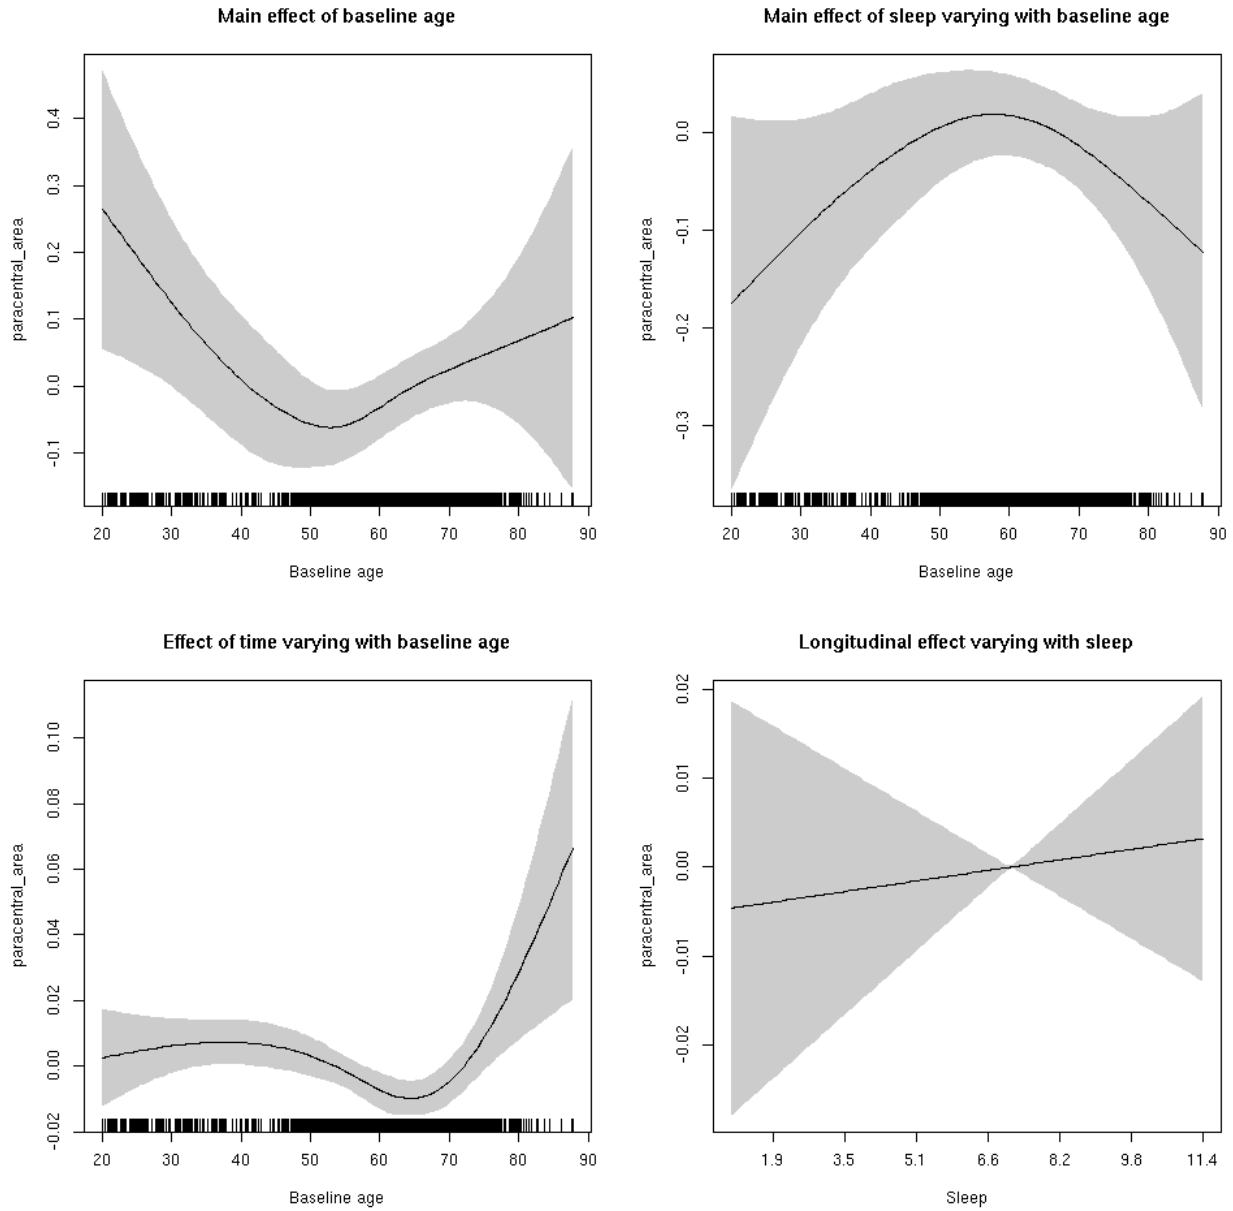

**Male: Full data** Below is the row for `s(sleep_z):time` from the model output.

```
## s(sleep_z):time      1      1 1.007  0.3156
```

Below are plots of a plot of `s(bl_age)`, `s(bl_age):sleep_z`, `s(bl_age):time`, and `s(sleep_z):time`. For `s(sleep_z):time`, roughly, if we cannot fit a straight line through the confidence bands, there is evidence that the effect of time depends on sleep duration. It is correct that the confidence interval is zero at one point along the axis; this happens because we do not include the main effect.

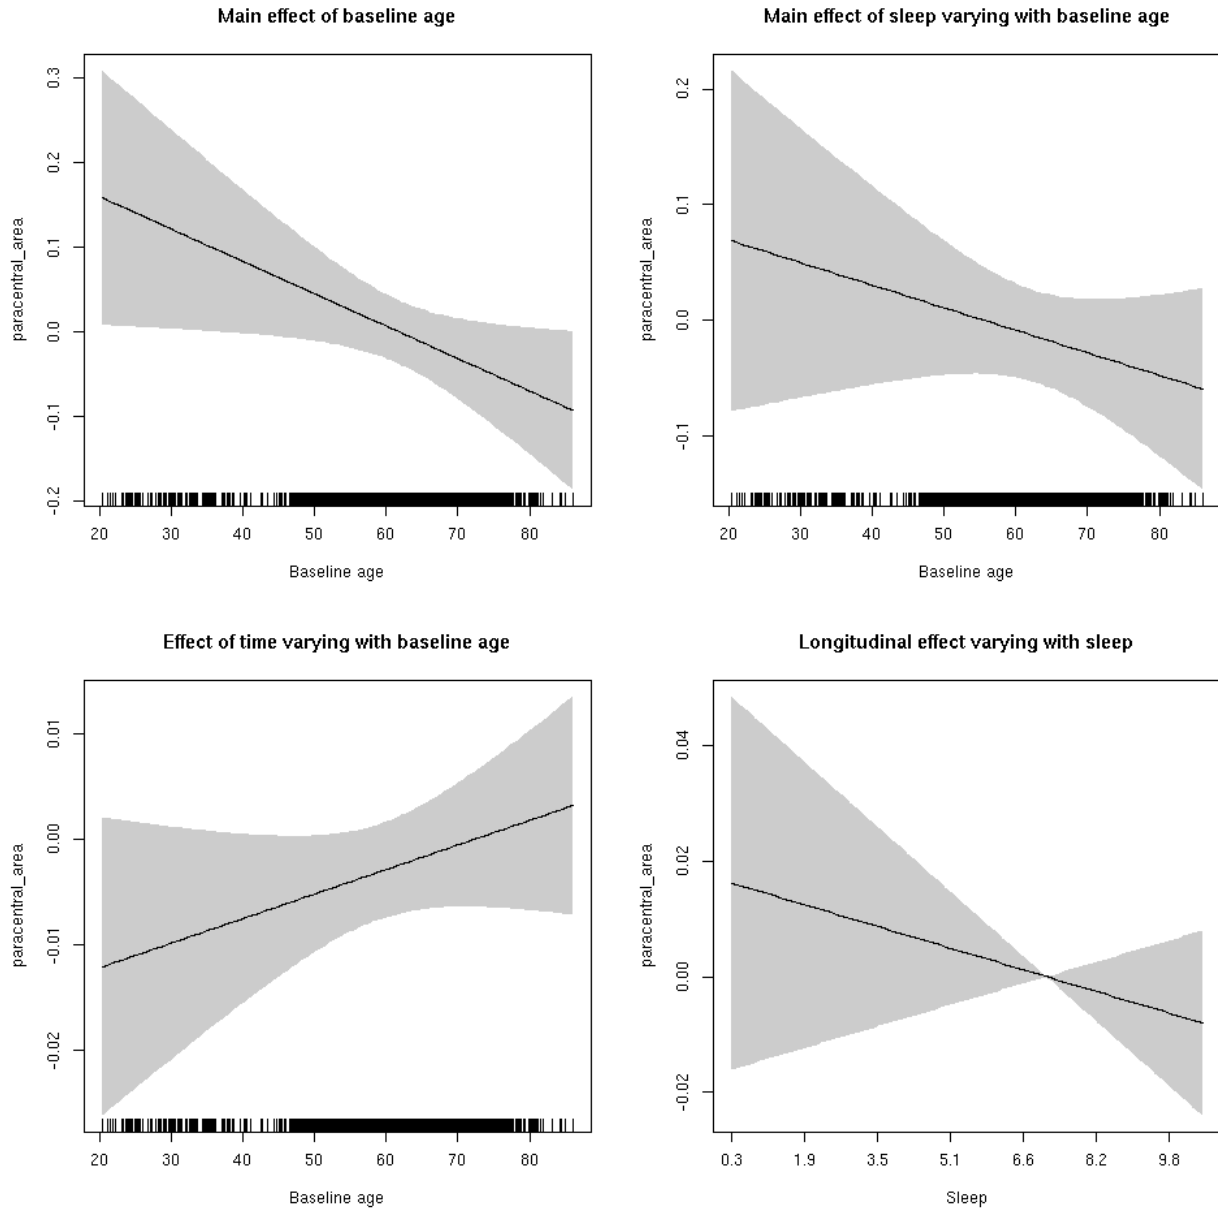

## paracentral\_area

**Full data** Below is the model output. The term `s(sleep_z):time` is probably what we care most about.

```
##
## Family: gaussian
## Link function: identity
##
## Formula:
## value ~ sex + site + icv + s(bl_age, k = 10, bs = "cr") + s(bl_age,
##   by = sleep_z, bs = "cr") + +s(bl_age, by = time, k = 5, bs = "cr") +
##   s(sleep_z, by = time, k = 5, bs = "cr", pc = 0)
## <environment: 0x5630035b6f88>
```

```

##
## Parametric coefficients:
##           Estimate Std. Error t value Pr(>|t|)
## (Intercept)  0.47336    0.05818   8.136 4.70e-16 ***
## sexmale      0.06377    0.02992   2.131  0.0331 *
## siteousAvanto -0.40734    0.07099  -5.738 9.91e-09 ***
## siteousPrisma -0.72013    0.15576  -4.623 3.84e-06 ***
## siteousSkyra  -0.59493    0.06875  -8.654 < 2e-16 ***
## siteUB       -0.57318    0.13416  -4.272 1.96e-05 ***
## siteUCAM     -0.47530    0.07211  -6.591 4.63e-11 ***
## siteUKB      -0.47642    0.05519  -8.633 < 2e-16 ***
## siteUmU      -0.15266    0.08308  -1.838  0.0662 .
## icv          0.58522    0.01470  39.798 < 2e-16 ***
## ---
## Signif. codes:  0 '***' 0.001 '**' 0.01 '*' 0.05 '.' 0.1 ' ' 1
##
## Approximate significance of smooth terms:
##           edf Ref.df   F p-value
## s(bl_age)      2.762  2.762 4.450  0.0090 **
## s(bl_age):sleep_z 3.144  3.144 2.050  0.0882 .
## s(bl_age):time  2.000  2.000 1.365  0.2554
## s(sleep_z):time  1.000  1.000 0.087  0.7676
## ---
## Signif. codes:  0 '***' 0.001 '**' 0.01 '*' 0.05 '.' 0.1 ' ' 1
##
## R-sq.(adj) =  0.392
## lmer.REML =  9277  Scale est. = 0.032103  n = 8170

```

Below are plots of a plot of  $s(\text{bl\_age})$ ,  $s(\text{bl\_age}):\text{sleep\_z}$ ,  $s(\text{bl\_age}):\text{time}$ , and  $s(\text{sleep\_z}):\text{time}$ . For  $s(\text{sleep\_z}):\text{time}$ , roughly, if we cannot fit a straight line through the confidence bands, there is evidence that the effect of time depends on sleep duration. It is correct that the confidence interval is zero at one point along the axis; this happens because we do not include the main effect.



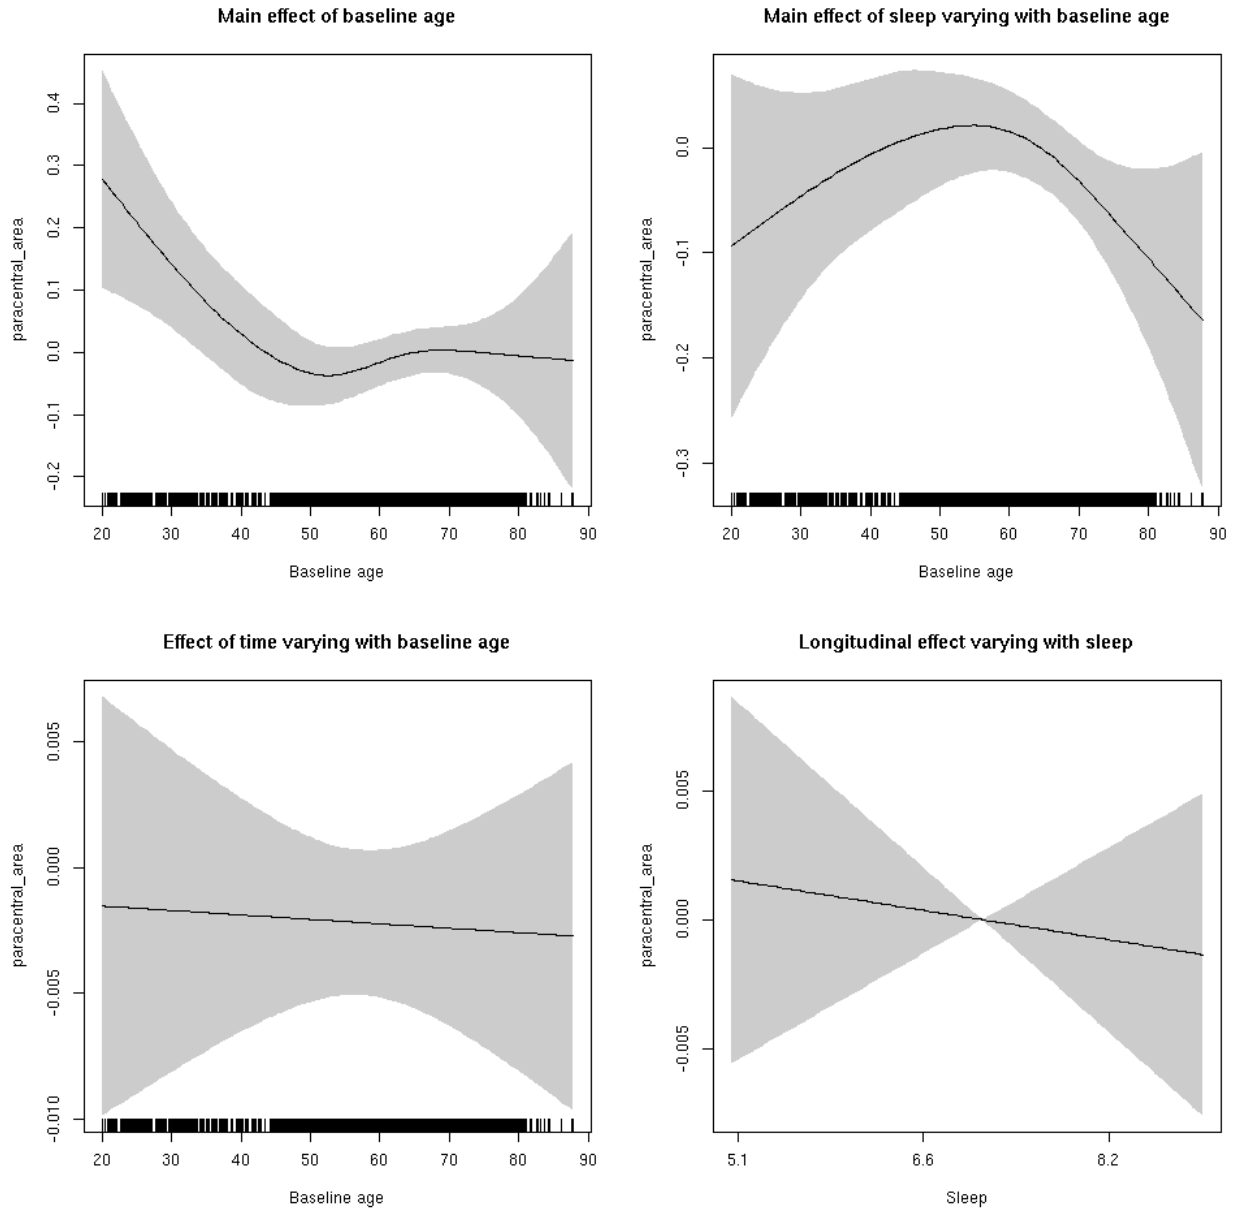

**Restricted to sleep  $\geq 5$  and  $\leq 9$  hours** Below is the row for `s(sleep_z):time` from the model output.

```
## s(sleep_z):time 1.000 1.000 0.188 0.66442
```

Below are plots of a plot of `s(bl_age)`, `s(bl_age):sleep_z`, `s(bl_age):time`, and `s(sleep_z):time`. For `s(sleep_z):time`, roughly, if we cannot fit a straight line through the confidence bands, there is evidence that the effect of time depends on sleep duration. It is correct that the confidence interval is zero at one point along the axis; this happens because we do not include the main effect.

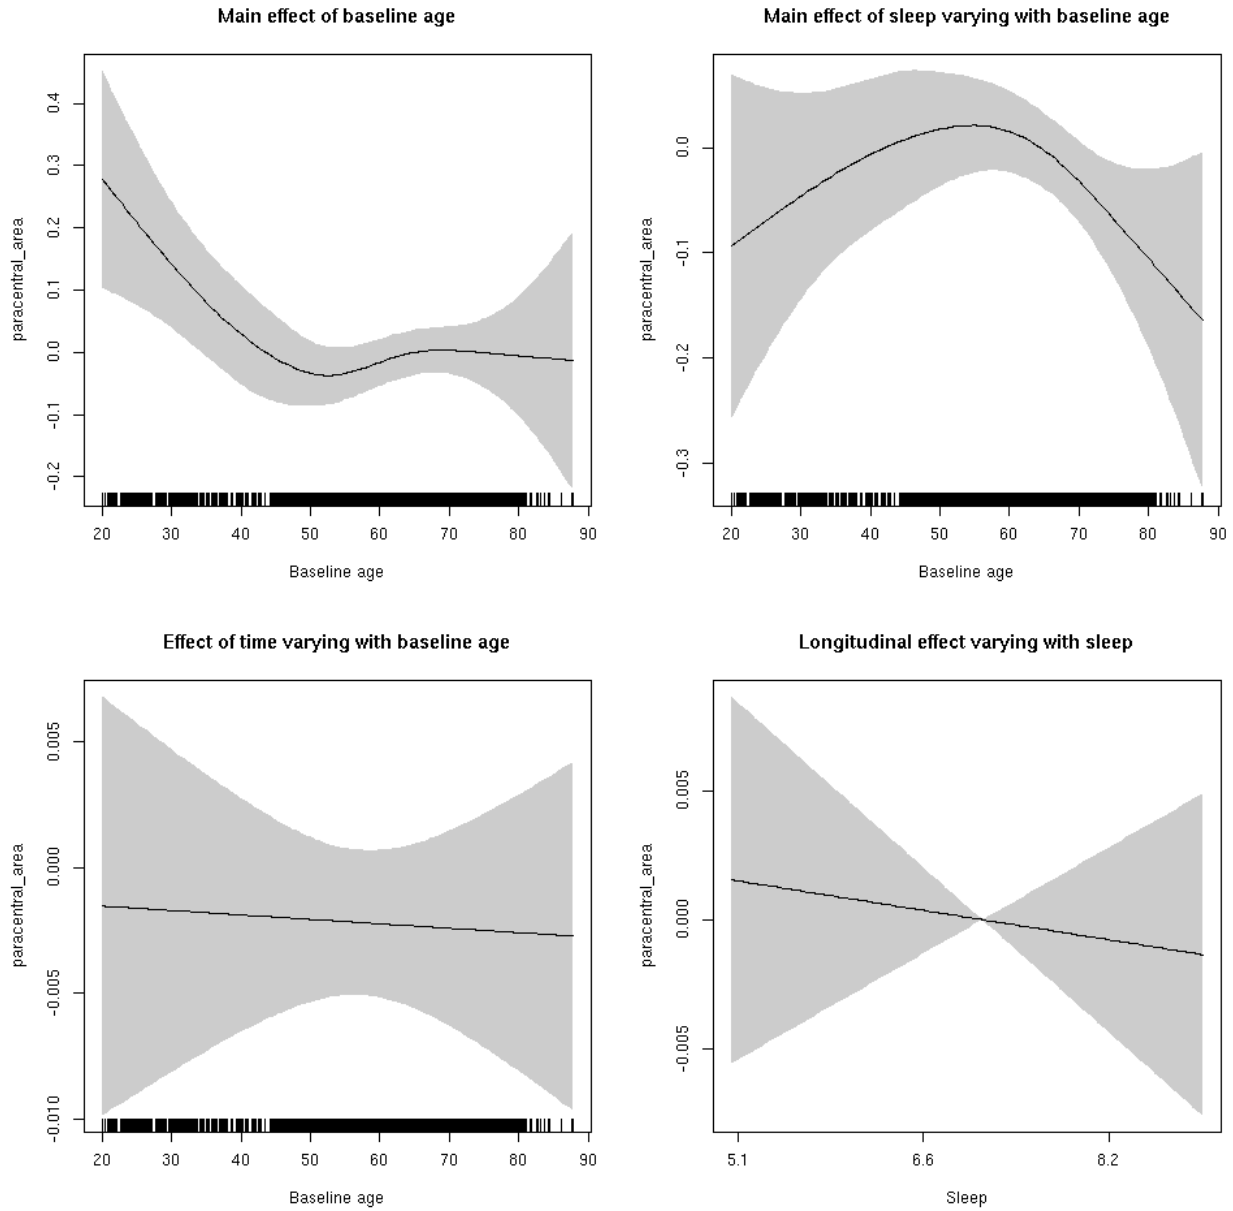

## paracentral\_thickness: Stratified by sex

**Female: Full data** Below is the row for `s(sleep_z):time` from the model output.

```
## s(sleep_z):time  1.000  1.000  0.222  0.637
```

Below are plots of a plot of `s(bl_age)`, `s(bl_age):sleep_z`, `s(bl_age):time`, and `s(sleep_z):time`. For `s(sleep_z):time`, roughly, if we cannot fit a straight line through the confidence bands, there is evidence that the effect of time depends on sleep duration. It is correct that the confidence interval is zero at one point along the axis; this happens because we do not include the main effect.

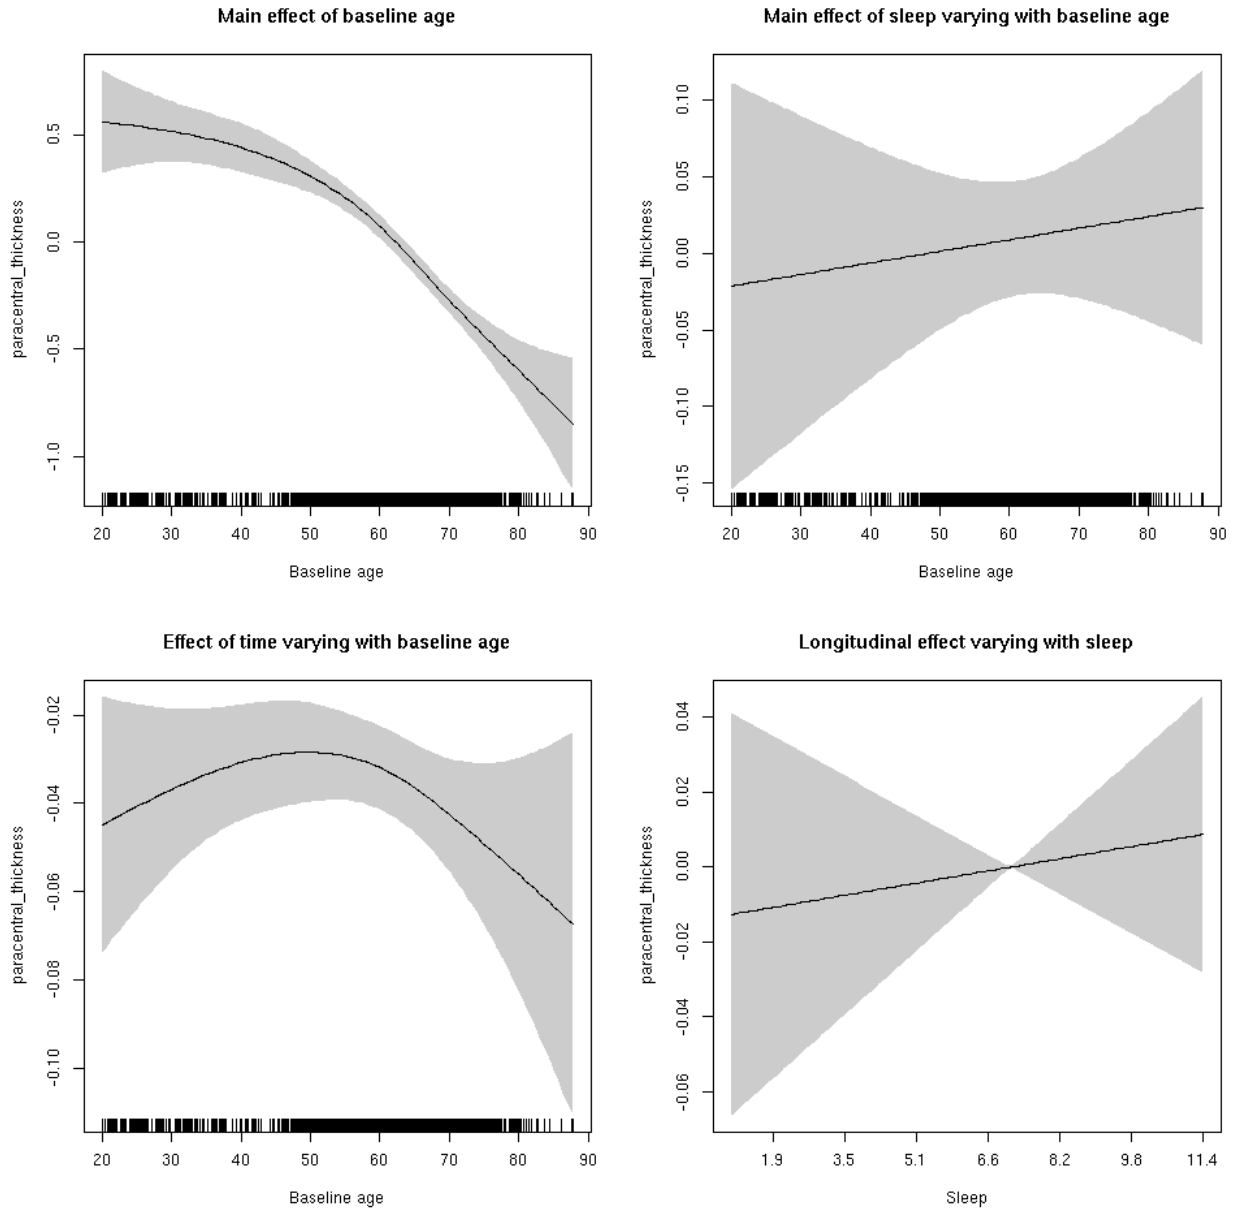

**Male: Full data** Below is the row for `s(sleep_z):time` from the model output.

```
## s(sleep_z):time  1.000  1.000  2.394  0.122
```

Below are plots of a plot of `s(bl_age)`, `s(bl_age):sleep_z`, `s(bl_age):time`, and `s(sleep_z):time`. For `s(sleep_z):time`, roughly, if we cannot fit a straight line through the confidence bands, there is evidence that the effect of time depends on sleep duration. It is correct that the confidence interval is zero at one point along the axis; this happens because we do not include the main effect.

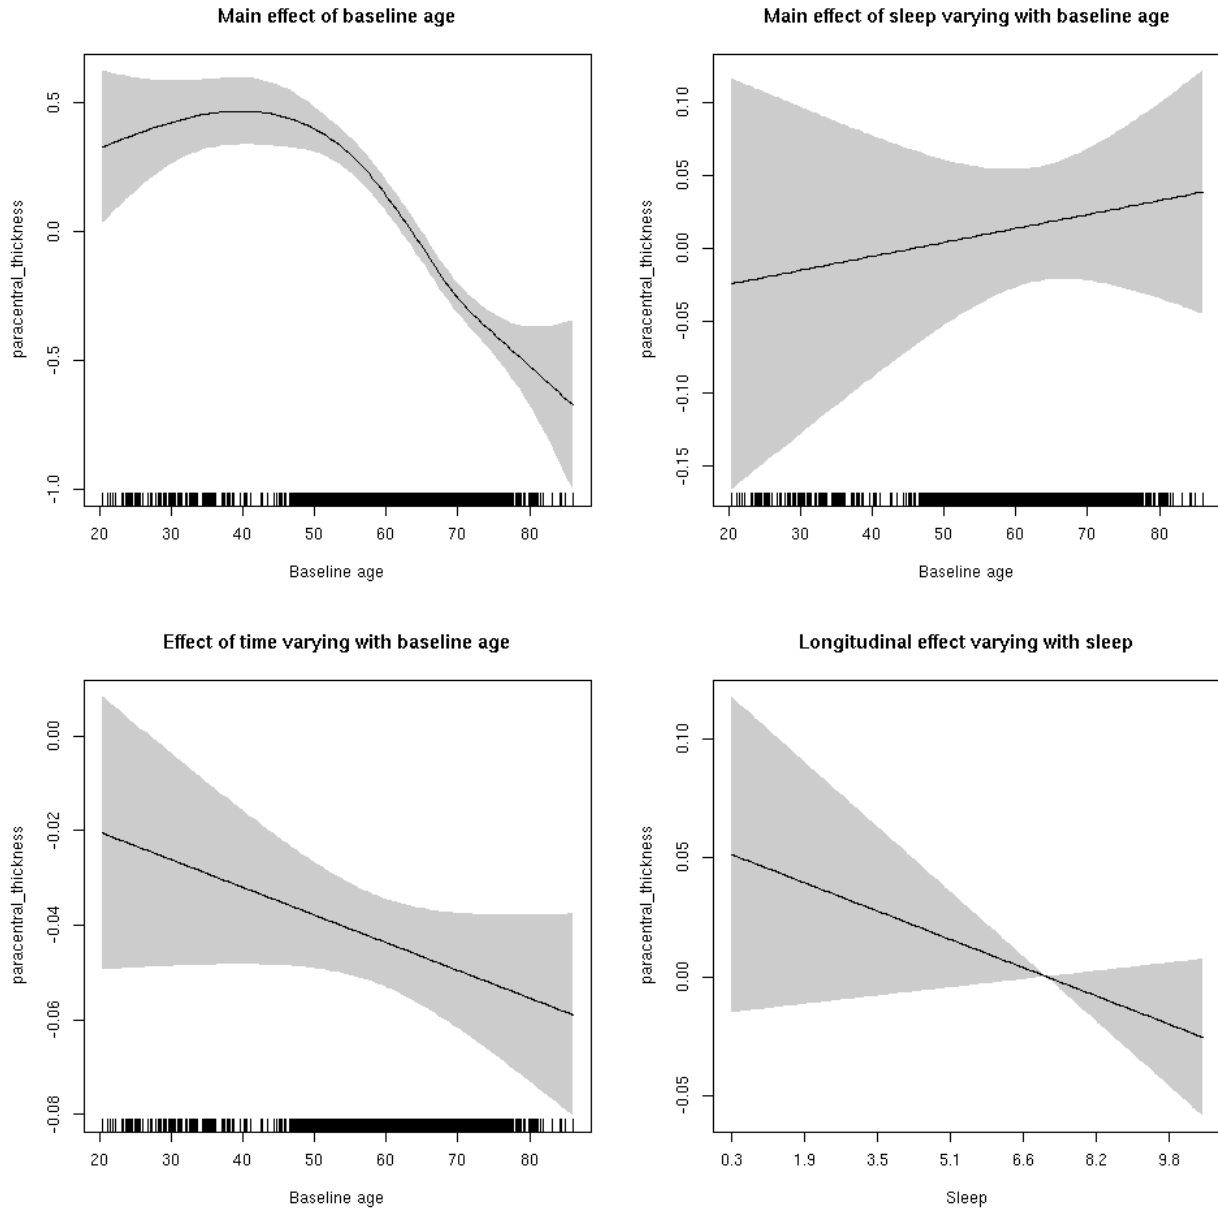

## paracentral\_thickness

**Full data** Below is the model output. The term `s(sleep_z):time` is probably what we care most about.

```
##
## Family: gaussian
## Link function: identity
##
## Formula:
## value ~ sex + site + s(bl_age, k = 10, bs = "cr") + s(bl_age,
##   by = sleep_z, bs = "cr") + +s(bl_age, by = time, k = 5, bs = "cr") +
##   s(sleep_z, by = time, k = 5, bs = "cr", pc = 0)
## <environment: 0x5630035c9228>
```

```

##
## Parametric coefficients:
##           Estimate Std. Error t value Pr(>|t|)
## (Intercept) -0.80122    0.05101 -15.707 < 2e-16 ***
## sexmale     -0.08001    0.02554  -3.133 0.001737 **
## siteousAvanto -0.62007    0.06791  -9.131 < 2e-16 ***
## siteousPrisma  0.25221    0.29992   0.841 0.400423
## siteousSkyra -0.23174    0.06788  -3.414 0.000643 ***
## siteUB       0.17647    0.13505   1.307 0.191357
## siteUCAM     -0.10217    0.07035  -1.452 0.146431
## siteUKB      0.99637    0.05172  19.263 < 2e-16 ***
## siteUmU      0.17245    0.08404   2.052 0.040209 *
## ---
## Signif. codes:  0 '***' 0.001 '**' 0.01 '*' 0.05 '.' 0.1 ' ' 1
##
## Approximate significance of smooth terms:
##           edf Ref.df      F p-value
## s(bl_age)      3.964  3.964 108.772 <2e-16 ***
## s(bl_age):sleep_z 2.000  2.000   0.684   0.505
## s(bl_age):time  2.785  2.785  57.104 <2e-16 ***
## s(sleep_z):time  1.000  1.000   0.662   0.416
## ---
## Signif. codes:  0 '***' 0.001 '**' 0.01 '*' 0.05 '.' 0.1 ' ' 1
##
## R-sq.(adj) =  0.344
## lmer.REML = 16253  Scale est. = 0.15615  n = 8176

```

Below are plots of a plot of `s(bl_age)`, `s(bl_age):sleep_z`, `s(bl_age):time`, and `s(sleep_z):time`. For `s(sleep_z):time`, roughly, if we cannot fit a straight line through the confidence bands, there is evidence that the effect of time depends on sleep duration. It is correct that the confidence interval is zero at one point along the axis; this happens because we do not include the main effect.

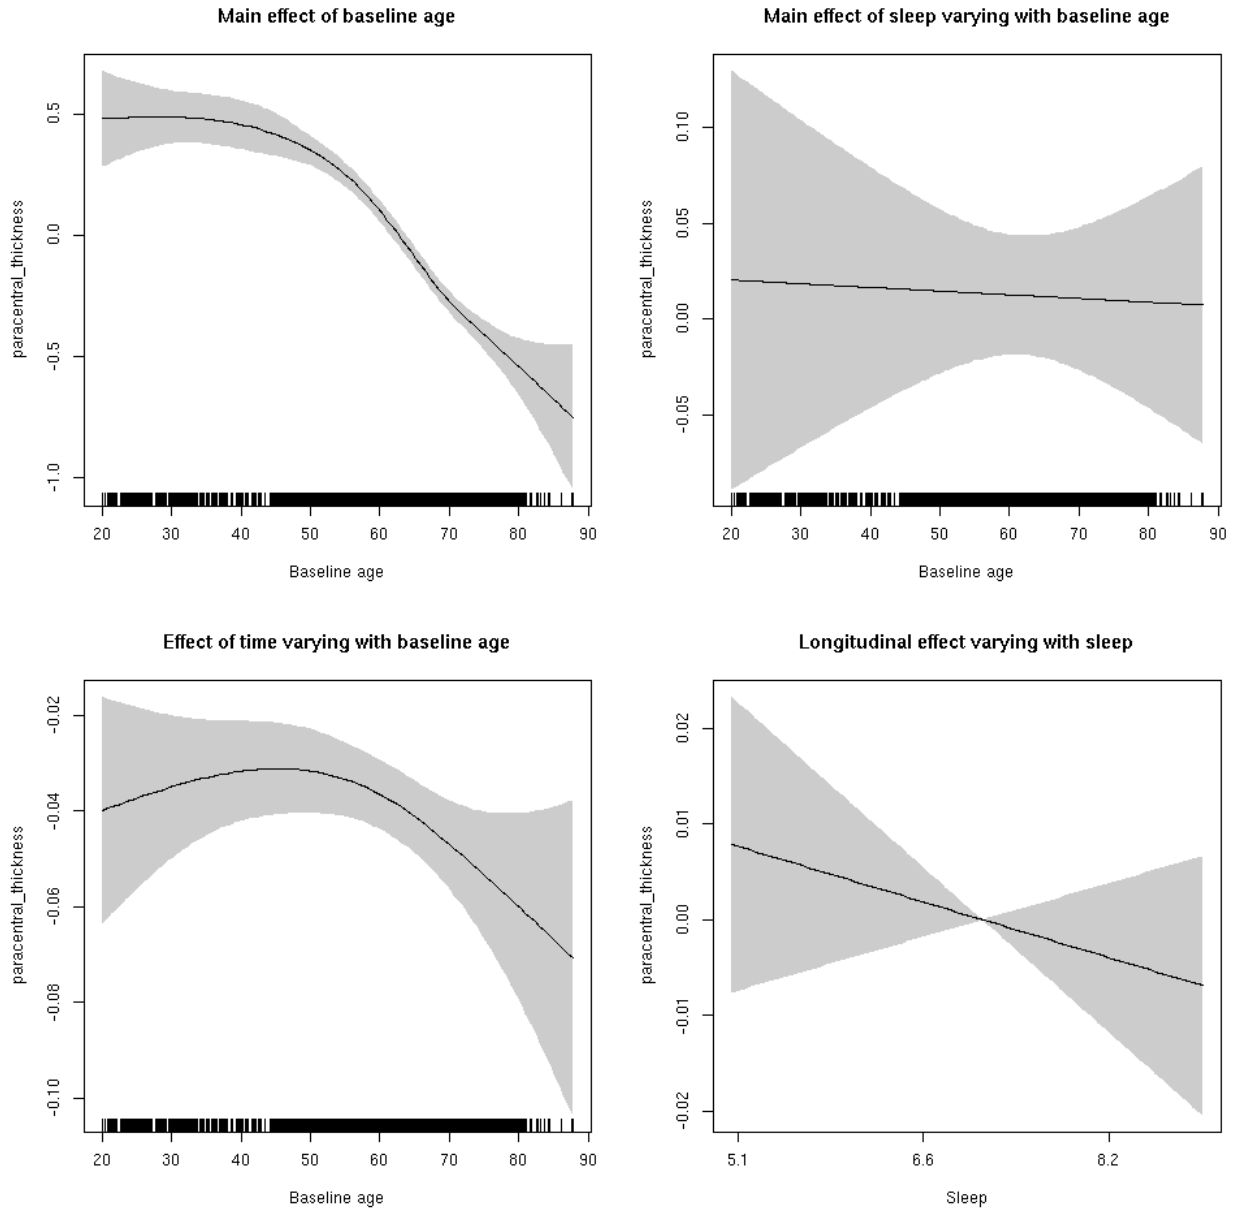

**Restricted to sleep  $\geq 5$  and  $\leq 9$  hours** Below is the row for `s(sleep_z):time` from the model output.

```
## s(sleep_z):time  1.000  1.000  1.033  0.31
```

Below are plots of a plot of `s(bl_age)`, `s(bl_age):sleep_z`, `s(bl_age):time`, and `s(sleep_z):time`. For `s(sleep_z):time`, roughly, if we cannot fit a straight line through the confidence bands, there is evidence that the effect of time depends on sleep duration. It is correct that the confidence interval is zero at one point along the axis; this happens because we do not include the main effect.

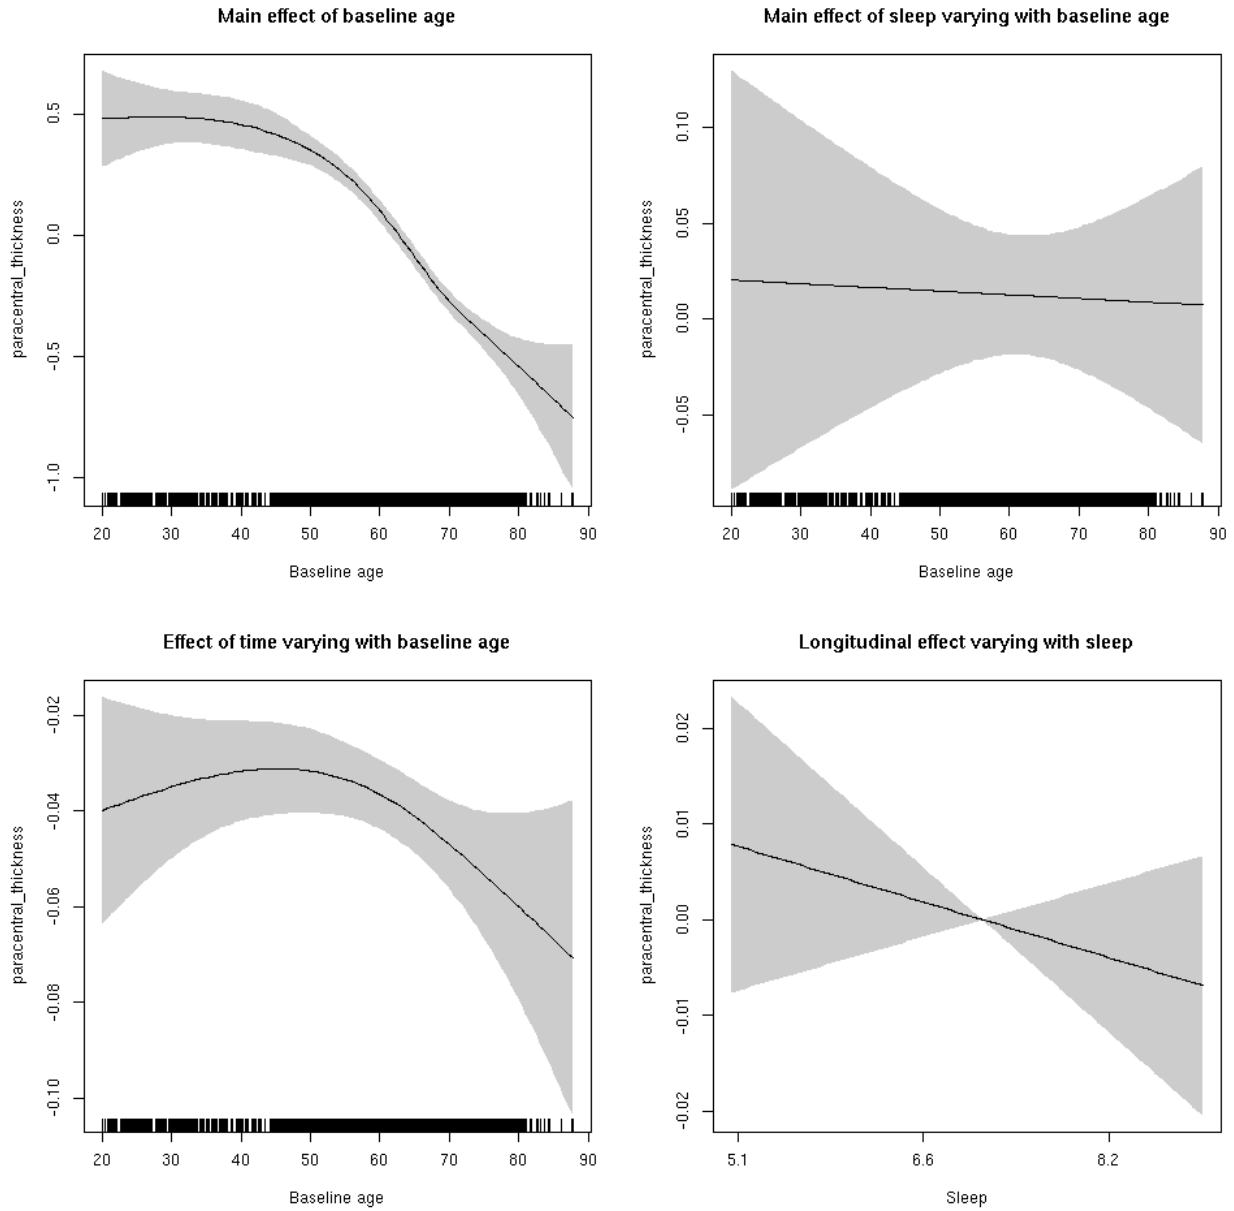

### paracentral\_volume: Stratified by sex

**Female: Full data** Below is the row for `s(sleep_z):time` from the model output.

```
## s(sleep_z):time  1.000  1.000  0.126  0.722
```

Below are plots of a plot of `s(bl_age)`, `s(bl_age):sleep_z`, `s(bl_age):time`, and `s(sleep_z):time`. For `s(sleep_z):time`, roughly, if we cannot fit a straight line through the confidence bands, there is evidence that the effect of time depends on sleep duration. It is correct that the confidence interval is zero at one point along the axis; this happens because we do not include the main effect.

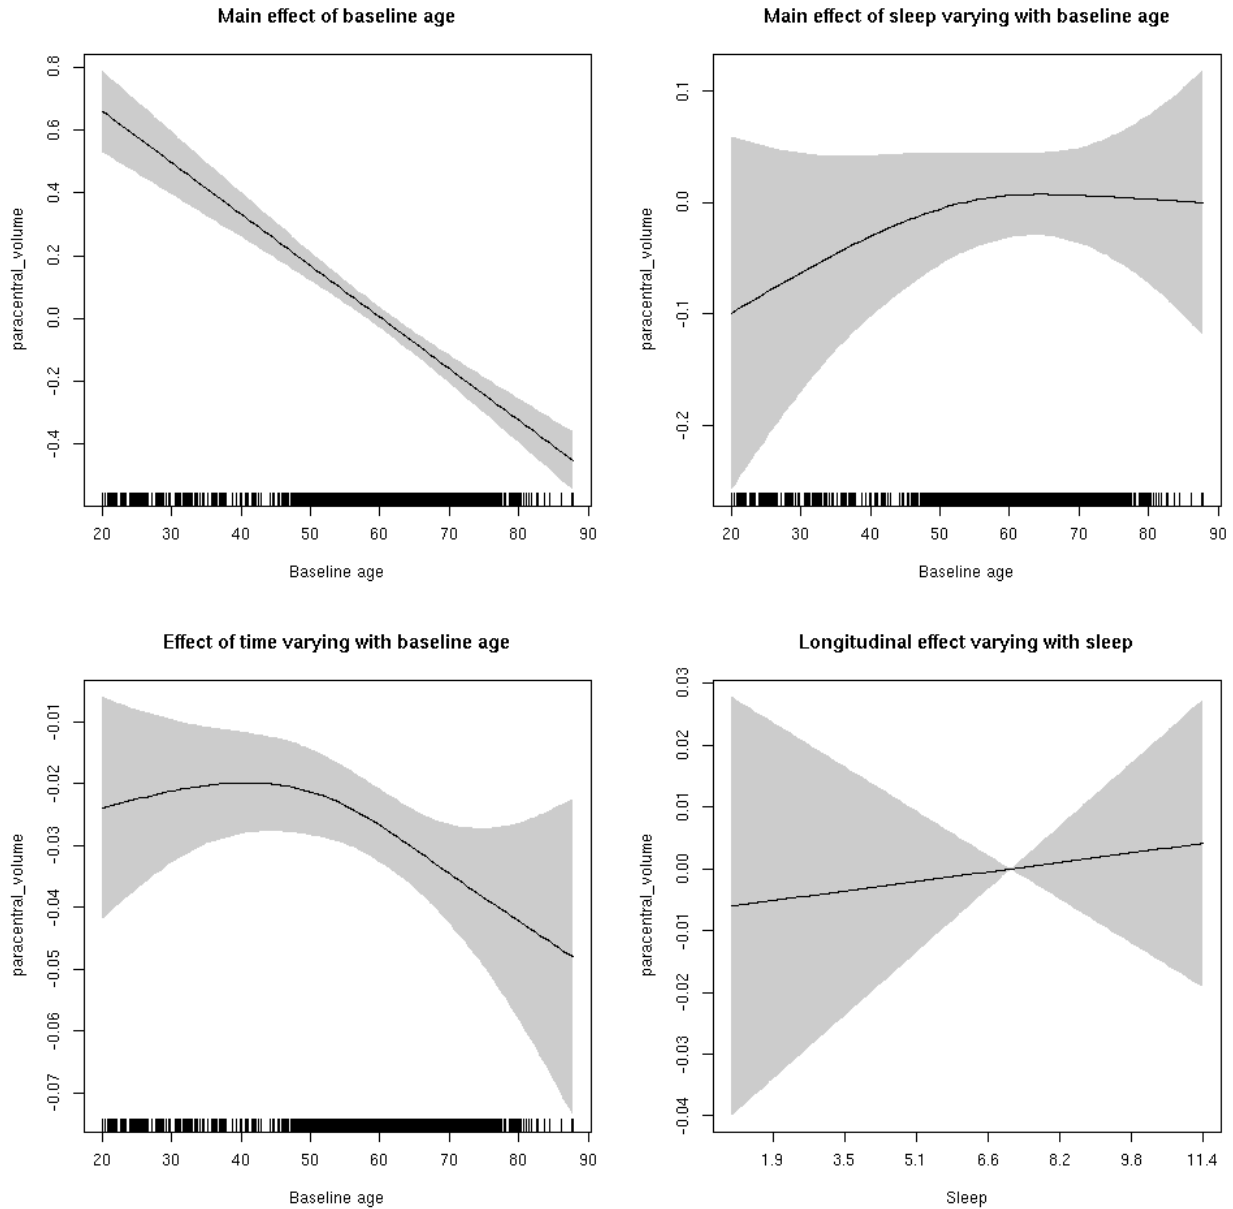

**Male: Full data** Below is the row for `s(sleep_z):time` from the model output.

```
## s(sleep_z):time  1.000  1.000  4.394  0.0361 *
```

Below are plots of a plot of `s(bl_age)`, `s(bl_age):sleep_z`, `s(bl_age):time`, and `s(sleep_z):time`. For `s(sleep_z):time`, roughly, if we cannot fit a straight line through the confidence bands, there is evidence that the effect of time depends on sleep duration. It is correct that the confidence interval is zero at one point along the axis; this happens because we do not include the main effect.



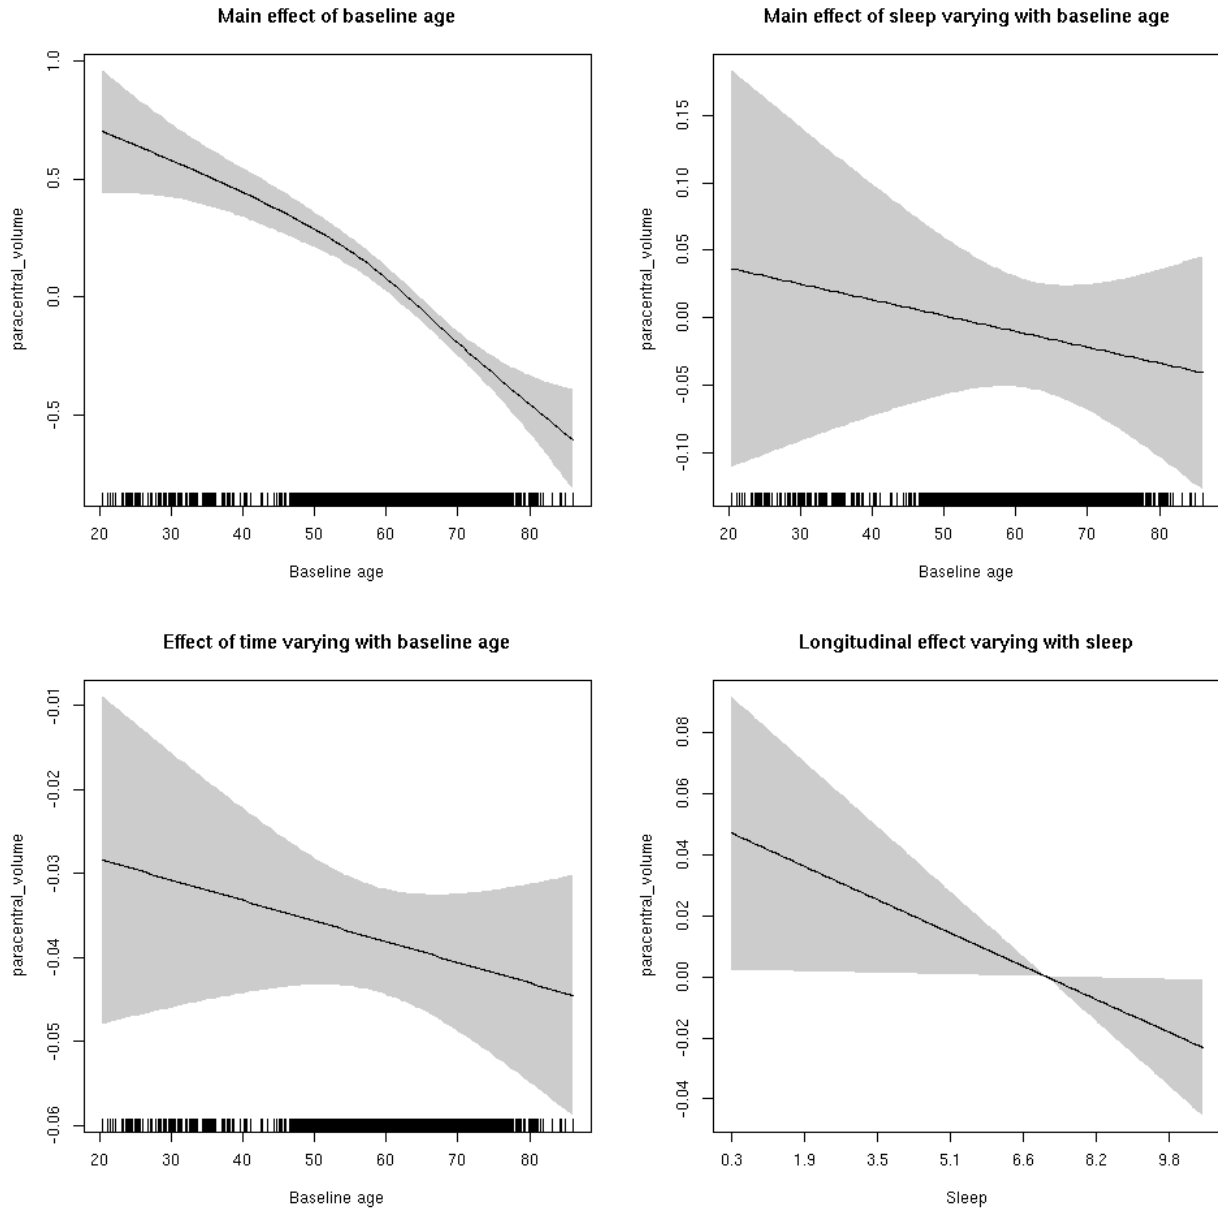

## paracentral\_volume

**Full data** Below is the model output. The term `s(sleep_z):time` is probably what we care most about.

```
##
## Family: gaussian
## Link function: identity
##
## Formula:
## value ~ sex + site + icv + s(bl_age, k = 10, bs = "cr") + s(bl_age,
##   by = sleep_z, bs = "cr") + +s(bl_age, by = time, k = 5, bs = "cr") +
##   s(sleep_z, by = time, k = 5, bs = "cr", pc = 0)
## <environment: 0x5630035ac8b0>
```

```

##
## Parametric coefficients:
##           Estimate Std. Error t value Pr(>|t|)
## (Intercept)  0.02554   0.05886   0.434  0.66434
## sexmale      -0.03046   0.03032  -1.004  0.31520
## siteousAvanto -0.94501   0.07235 -13.062 < 2e-16 ***
## siteousPrisma -0.42821   0.20761  -2.063  0.03919 *
## siteousSkyra  -0.53940   0.06999  -7.707 1.44e-14 ***
## siteUB        -0.37346   0.13519  -2.762  0.00575 **
## siteUCAM      -0.56375   0.07275  -7.749 1.04e-14 ***
## siteUKB        0.11408   0.05553   2.054  0.03996 *
## siteUmU        0.09375   0.08398   1.116  0.26434
## icv            0.52594   0.01497  35.122 < 2e-16 ***
## ---
## Signif. codes:  0 '***' 0.001 '**' 0.01 '*' 0.05 '.' 0.1 ' ' 1
##
## Approximate significance of smooth terms:
##           edf Ref.df      F p-value
## s(bl_age)      2.047  2.047 132.758 <2e-16 ***
## s(bl_age):sleep_z 2.400  2.400   0.248   0.798
## s(bl_age):time  2.000  2.000 129.088 <2e-16 ***
## s(sleep_z):time  1.000  1.000   2.262   0.133
## ---
## Signif. codes:  0 '***' 0.001 '**' 0.01 '*' 0.05 '.' 0.1 ' ' 1
##
## R-sq.(adj) =  0.393
## lmer.REML = 12391  Scale est. = 0.065177  n = 8178

```

Below are plots of a plot of `s(bl_age)`, `s(bl_age):sleep_z`, `s(bl_age):time`, and `s(sleep_z):time`. For `s(sleep_z):time`, roughly, if we cannot fit a straight line through the confidence bands, there is evidence that the effect of time depends on sleep duration. It is correct that the confidence interval is zero at one point along the axis; this happens because we do not include the main effect.

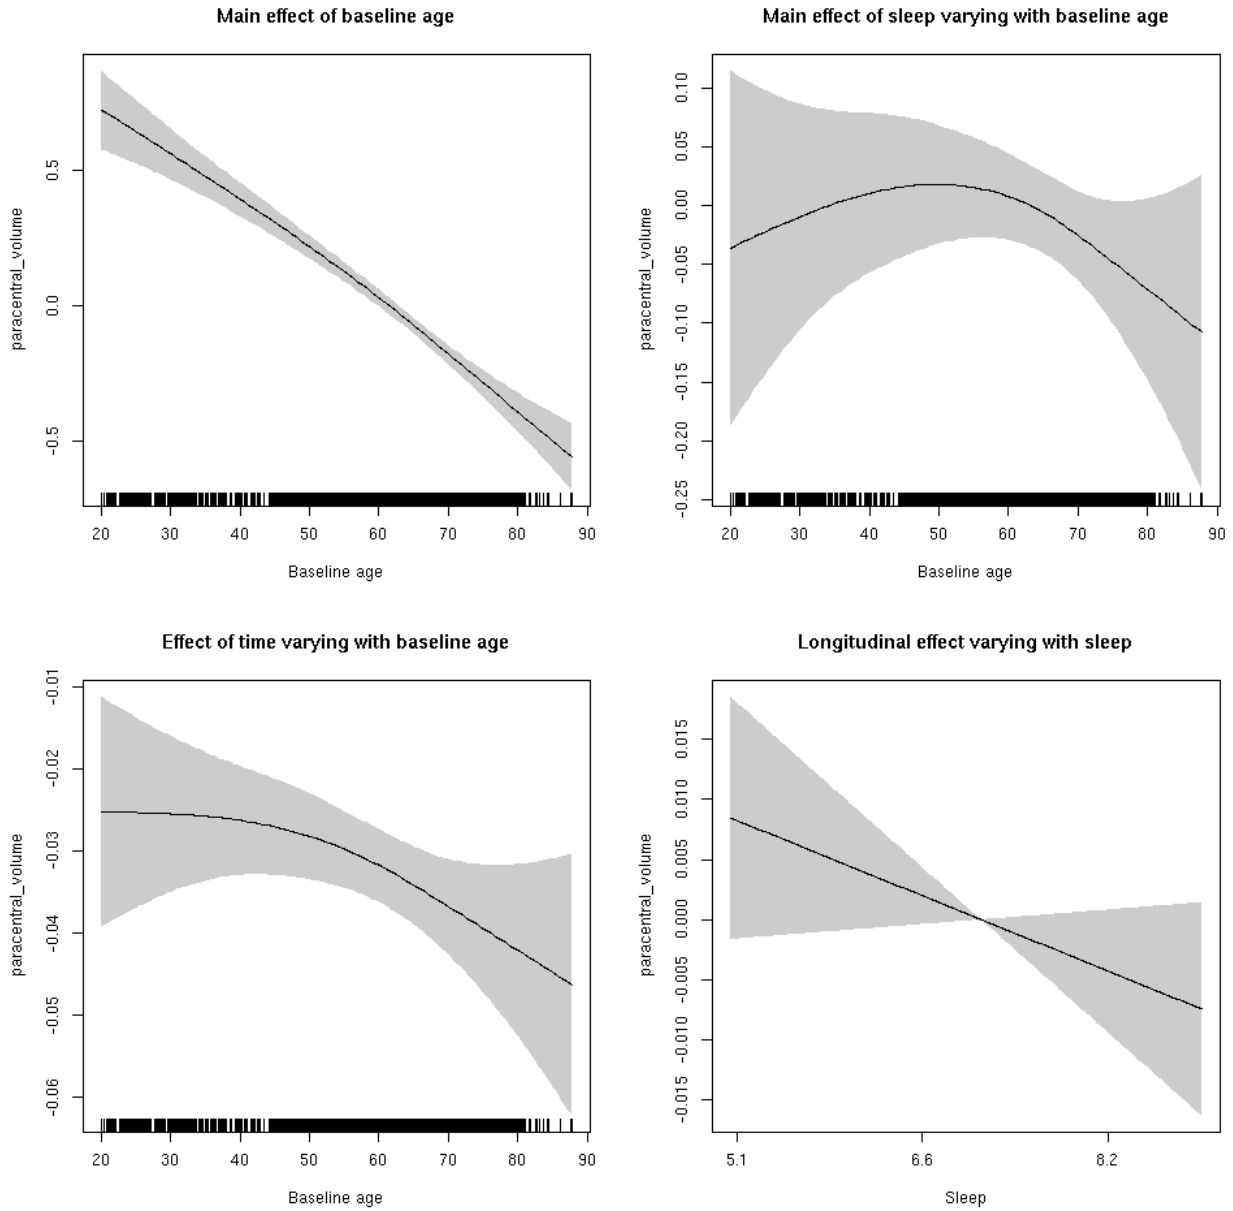

**Restricted to sleep  $\geq 5$  and  $\leq 9$  hours** Below is the row for `s(sleep_z):time` from the model output.

```
## s(sleep_z):time  1.000  1.000  2.815  0.0934 .
```

Below are plots of a plot of `s(bl_age)`, `s(bl_age):sleep_z`, `s(bl_age):time`, and `s(sleep_z):time`. For `s(sleep_z):time`, roughly, if we cannot fit a straight line through the confidence bands, there is evidence that the effect of time depends on sleep duration. It is correct that the confidence interval is zero at one point along the axis; this happens because we do not include the main effect.

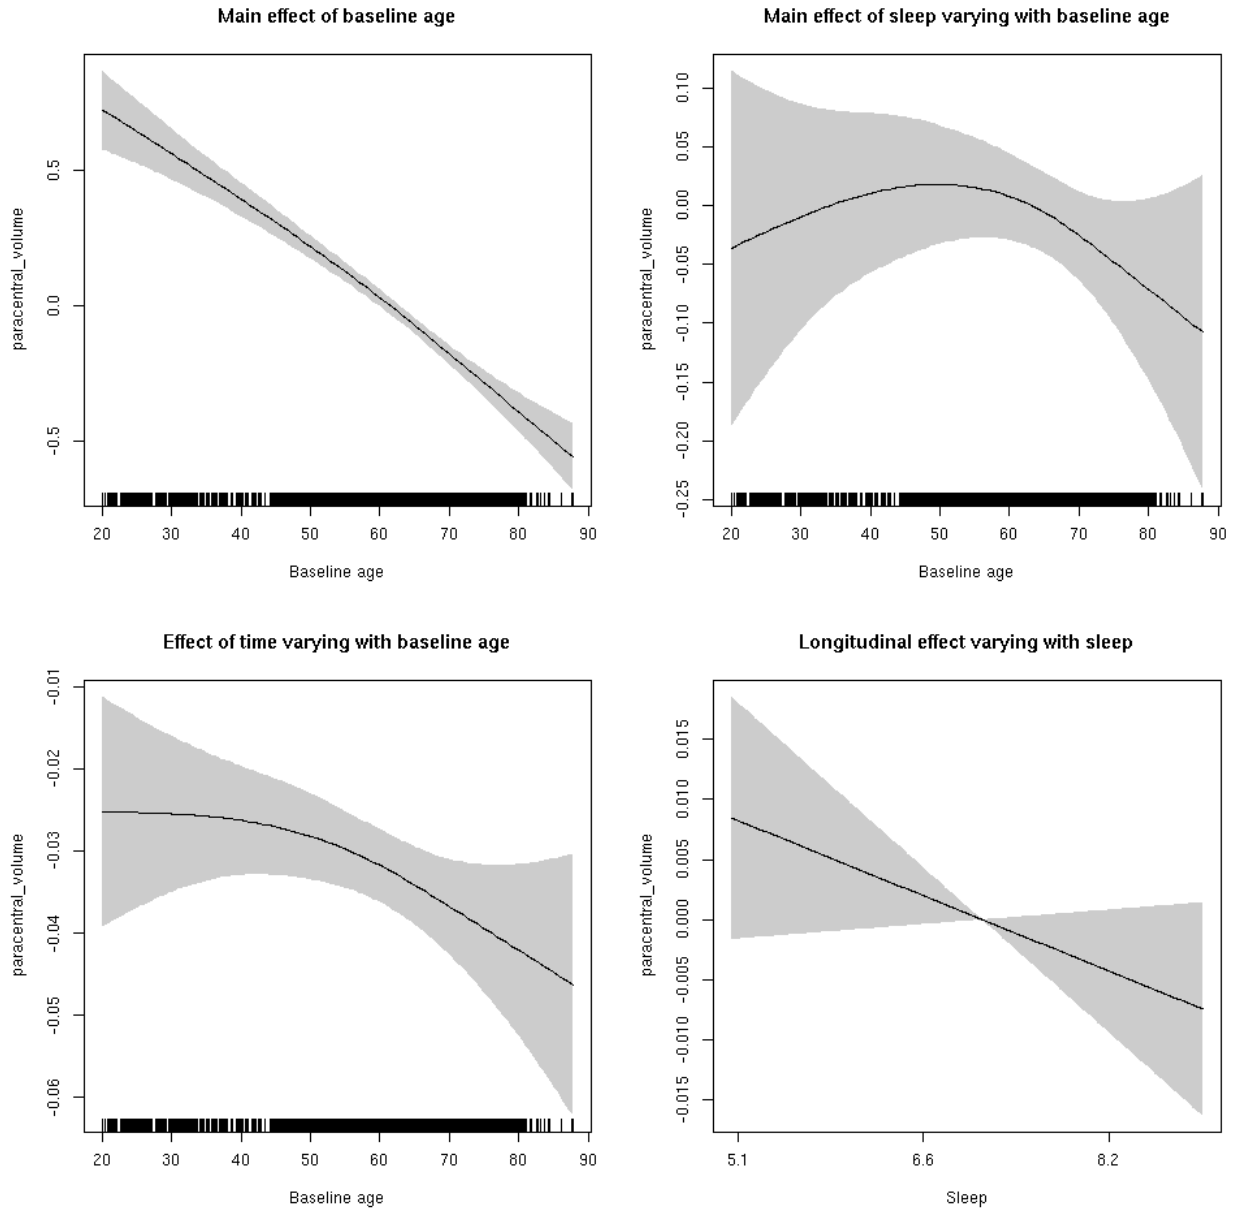

### parahippocampal\_area: Stratified by sex

**Female: Full data** Below is the row for `s(sleep_z):time` from the model output.

```
## s(sleep_z):time  1.000  1.000  0.073  0.787
```

Below are plots of a plot of `s(bl_age)`, `s(bl_age):sleep_z`, `s(bl_age):time`, and `s(sleep_z):time`. For `s(sleep_z):time`, roughly, if we cannot fit a straight line through the confidence bands, there is evidence that the effect of time depends on sleep duration. It is correct that the confidence interval is zero at one point along the axis; this happens because we do not include the main effect.

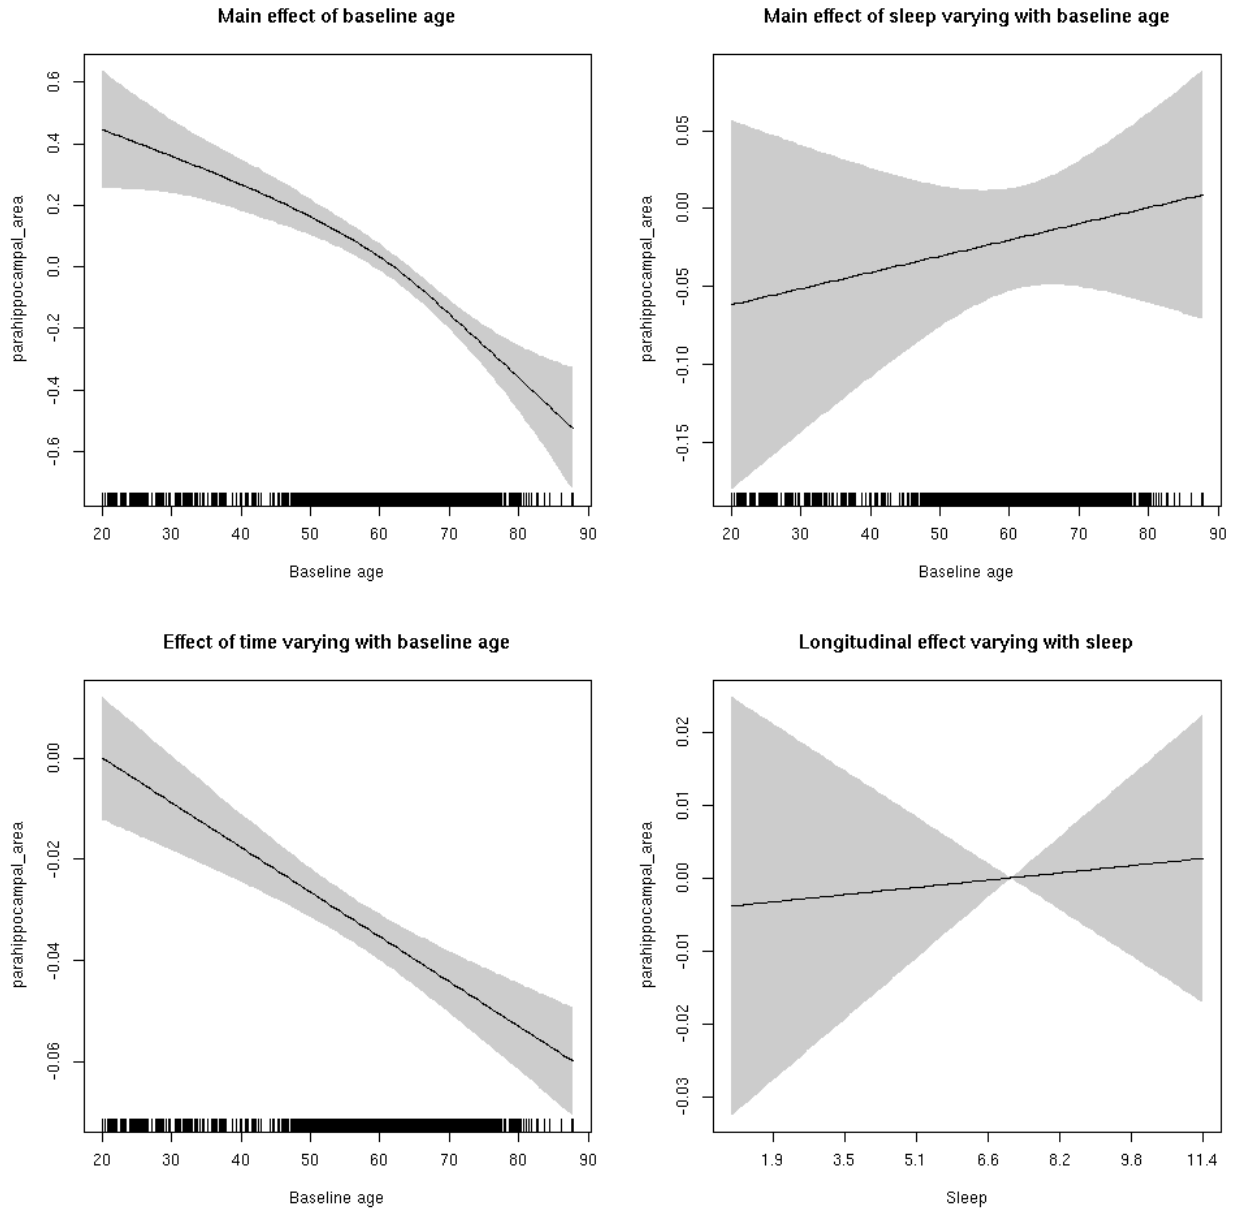

**Male: Full data** Below is the row for `s(sleep_z):time` from the model output.

```
## s(sleep_z):time  1.000  1.000  0.291  0.590
```

Below are plots of a plot of `s(bl_age)`, `s(bl_age):sleep_z`, `s(bl_age):time`, and `s(sleep_z):time`. For `s(sleep_z):time`, roughly, if we cannot fit a straight line through the confidence bands, there is evidence that the effect of time depends on sleep duration. It is correct that the confidence interval is zero at one point along the axis; this happens because we do not include the main effect.

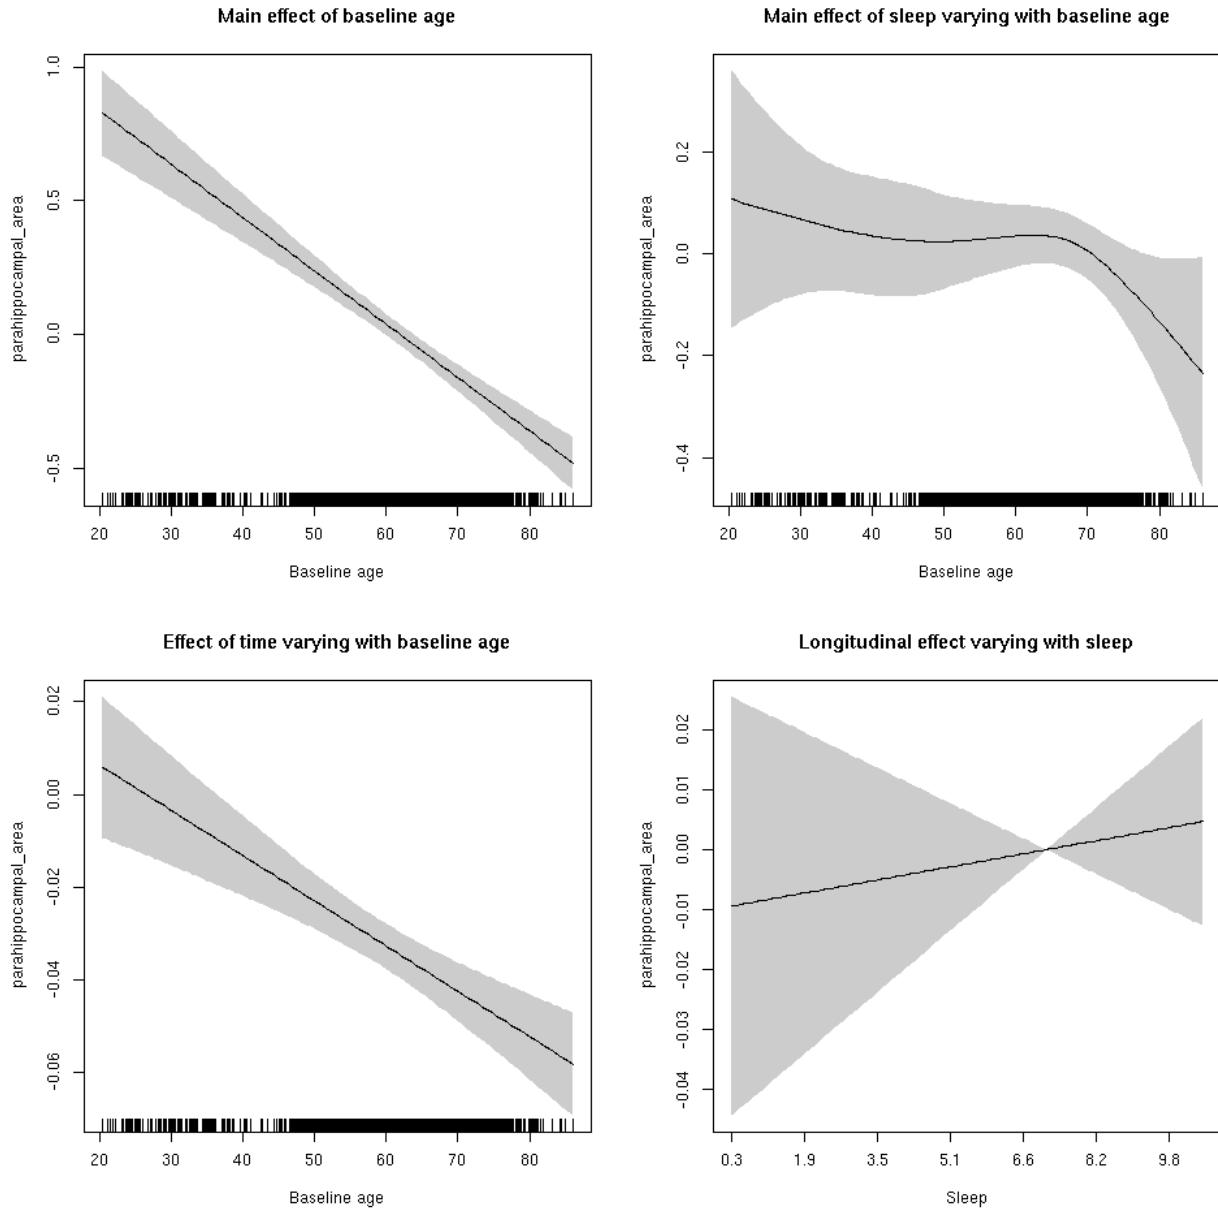

## parahippocampal\_area

**Full data** Below is the model output. The term `s(sleep_z):time` is probably what we care most about.

```
##
## Family: gaussian
## Link function: identity
##
## Formula:
## value ~ sex + site + icv + s(bl_age, k = 10, bs = "cr") + s(bl_age,
##   by = sleep_z, bs = "cr") + +s(bl_age, by = time, k = 5, bs = "cr") +
##   s(sleep_z, by = time, k = 5, bs = "cr", pc = 0)
## <environment: 0x5630035b1a08>
```

```

##
## Parametric coefficients:
##           Estimate Std. Error t value Pr(>|t|)
## (Intercept)  0.70912    0.05986  11.846 < 2e-16 ***
## sexmale      0.15942    0.03079   5.177 2.31e-07 ***
## siteousAvanto -0.88258    0.07318 -12.061 < 2e-16 ***
## siteousPrisma -1.21544    0.17518  -6.938 4.27e-12 ***
## siteousSkyra  -0.46729    0.07082  -6.598 4.41e-11 ***
## siteUB       -0.75145    0.13785  -5.451 5.15e-08 ***
## siteUCAM     -0.86386    0.07411 -11.656 < 2e-16 ***
## siteUKB      -0.76202    0.05672 -13.434 < 2e-16 ***
## siteUmU      -0.54912    0.08544  -6.427 1.38e-10 ***
## icv          0.49151    0.01515  32.442 < 2e-16 ***
## ---
## Signif. codes:  0 '***' 0.001 '**' 0.01 '*' 0.05 '.' 0.1 ' ' 1
##
## Approximate significance of smooth terms:
##           edf Ref.df      F p-value
## s(bl_age)      2.598  2.598  77.274 <2e-16 ***
## s(bl_age):sleep_z 2.657  2.657   0.187  0.830
## s(bl_age):time  2.000  2.000 221.583 <2e-16 ***
## s(sleep_z):time  1.000  1.000   0.364  0.546
## ---
## Signif. codes:  0 '***' 0.001 '**' 0.01 '*' 0.05 '.' 0.1 ' ' 1
##
## R-sq.(adj) =  0.352
## lmer.REML = 10712 Scale est. = 0.042724 n = 8172

```

Below are plots of a plot of  $s(\text{bl\_age})$ ,  $s(\text{bl\_age}):\text{sleep\_z}$ ,  $s(\text{bl\_age}):\text{time}$ , and  $s(\text{sleep\_z}):\text{time}$ . For  $s(\text{sleep\_z}):\text{time}$ , roughly, if we cannot fit a straight line through the confidence bands, there is evidence that the effect of time depends on sleep duration. It is correct that the confidence interval is zero at one point along the axis; this happens because we do not include the main effect.

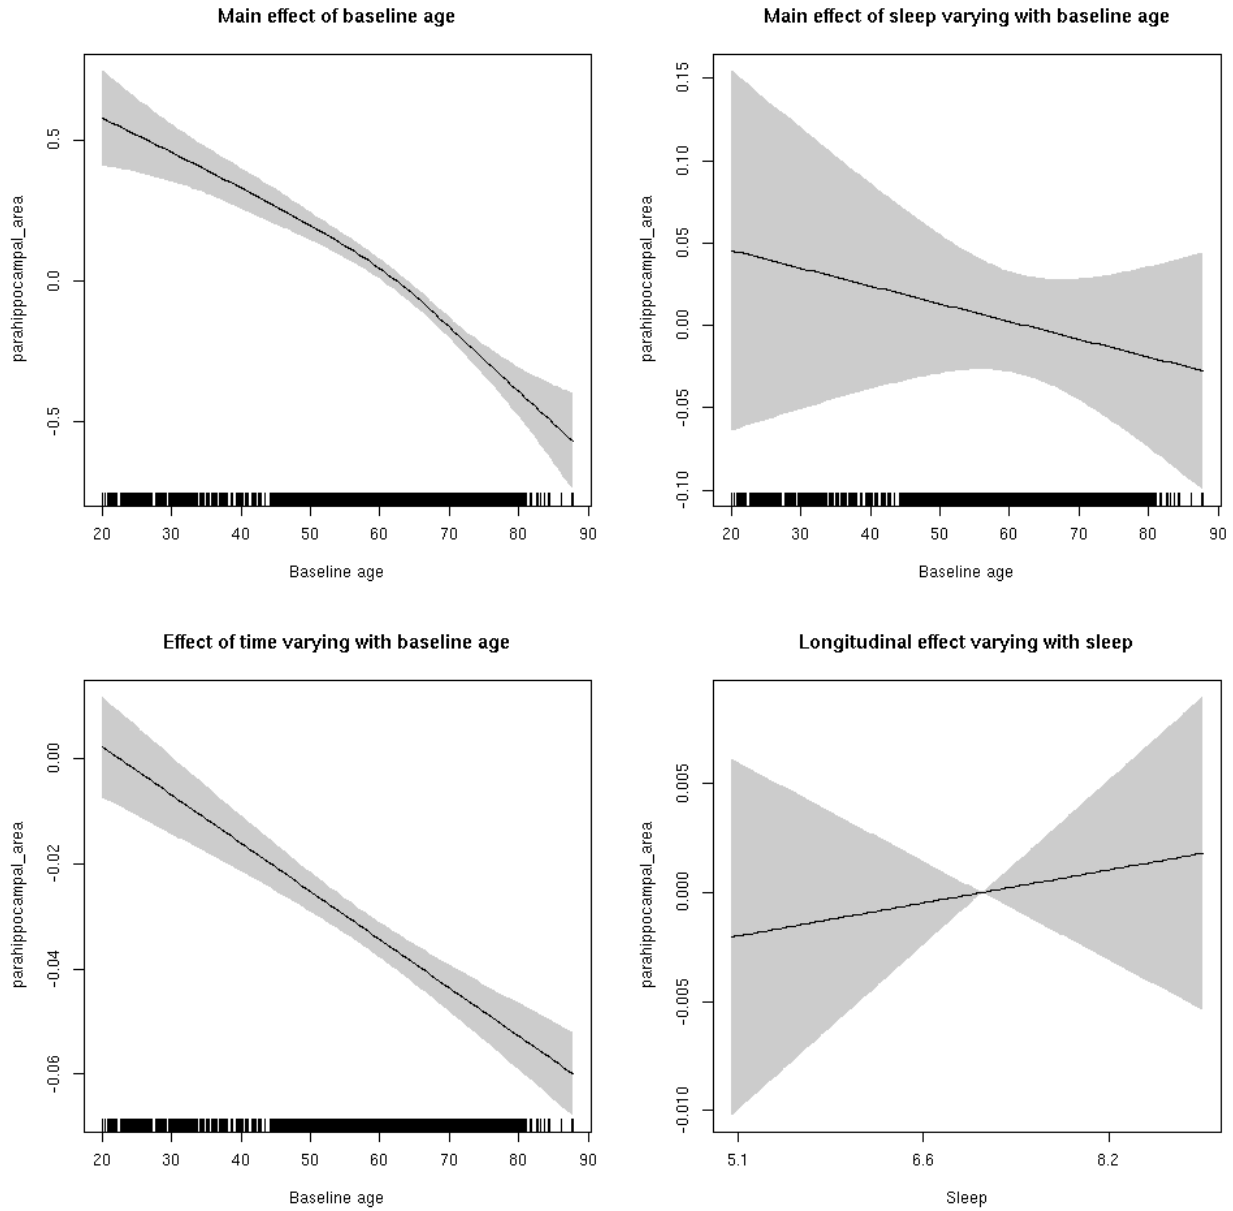

**Restricted to sleep  $\geq 5$  and  $\leq 9$  hours** Below is the row for `s(sleep_z):time` from the model output.

```
## s(sleep_z):time 1.000 1.000 0.251 0.617
```

Below are plots of a plot of `s(bl_age)`, `s(bl_age):sleep_z`, `s(bl_age):time`, and `s(sleep_z):time`. For `s(sleep_z):time`, roughly, if we cannot fit a straight line through the confidence bands, there is evidence that the effect of time depends on sleep duration. It is correct that the confidence interval is zero at one point along the axis; this happens because we do not include the main effect.



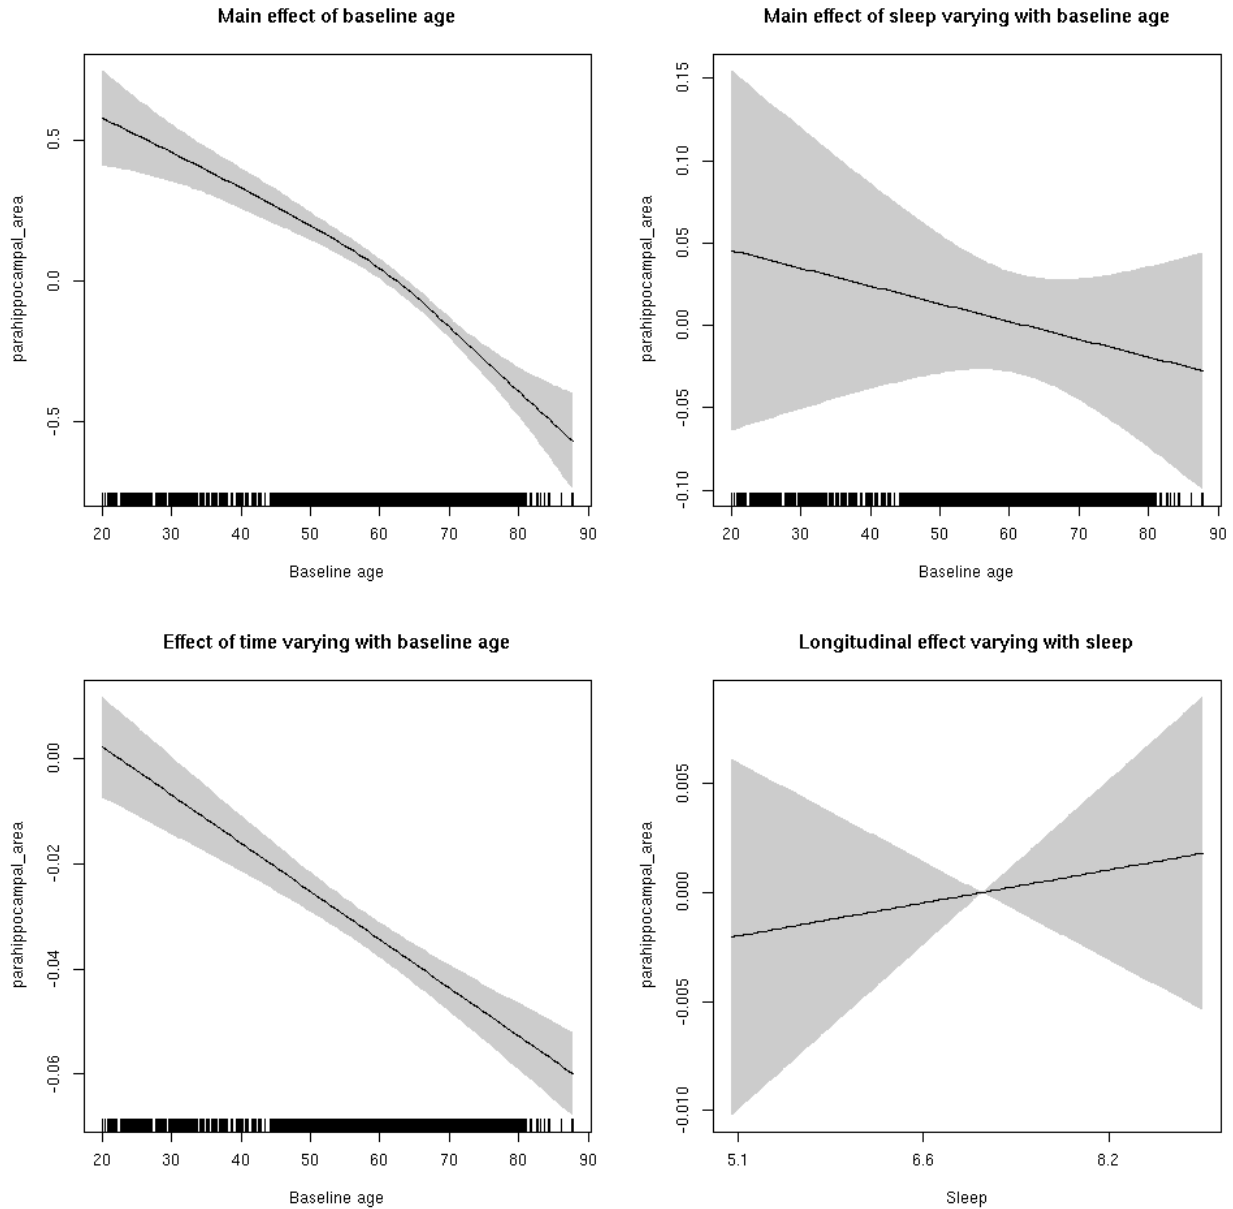

## parahippocampal\_thickness: Stratified by sex

**Female: Full data** Below is the row for `s(sleep_z):time` from the model output.

```
## s(sleep_z):time  1.000  1.000  0.887  0.346
```

Below are plots of a plot of `s(bl_age)`, `s(bl_age):sleep_z`, `s(bl_age):time`, and `s(sleep_z):time`. For `s(sleep_z):time`, roughly, if we cannot fit a straight line through the confidence bands, there is evidence that the effect of time depends on sleep duration. It is correct that the confidence interval is zero at one point along the axis; this happens because we do not include the main effect.

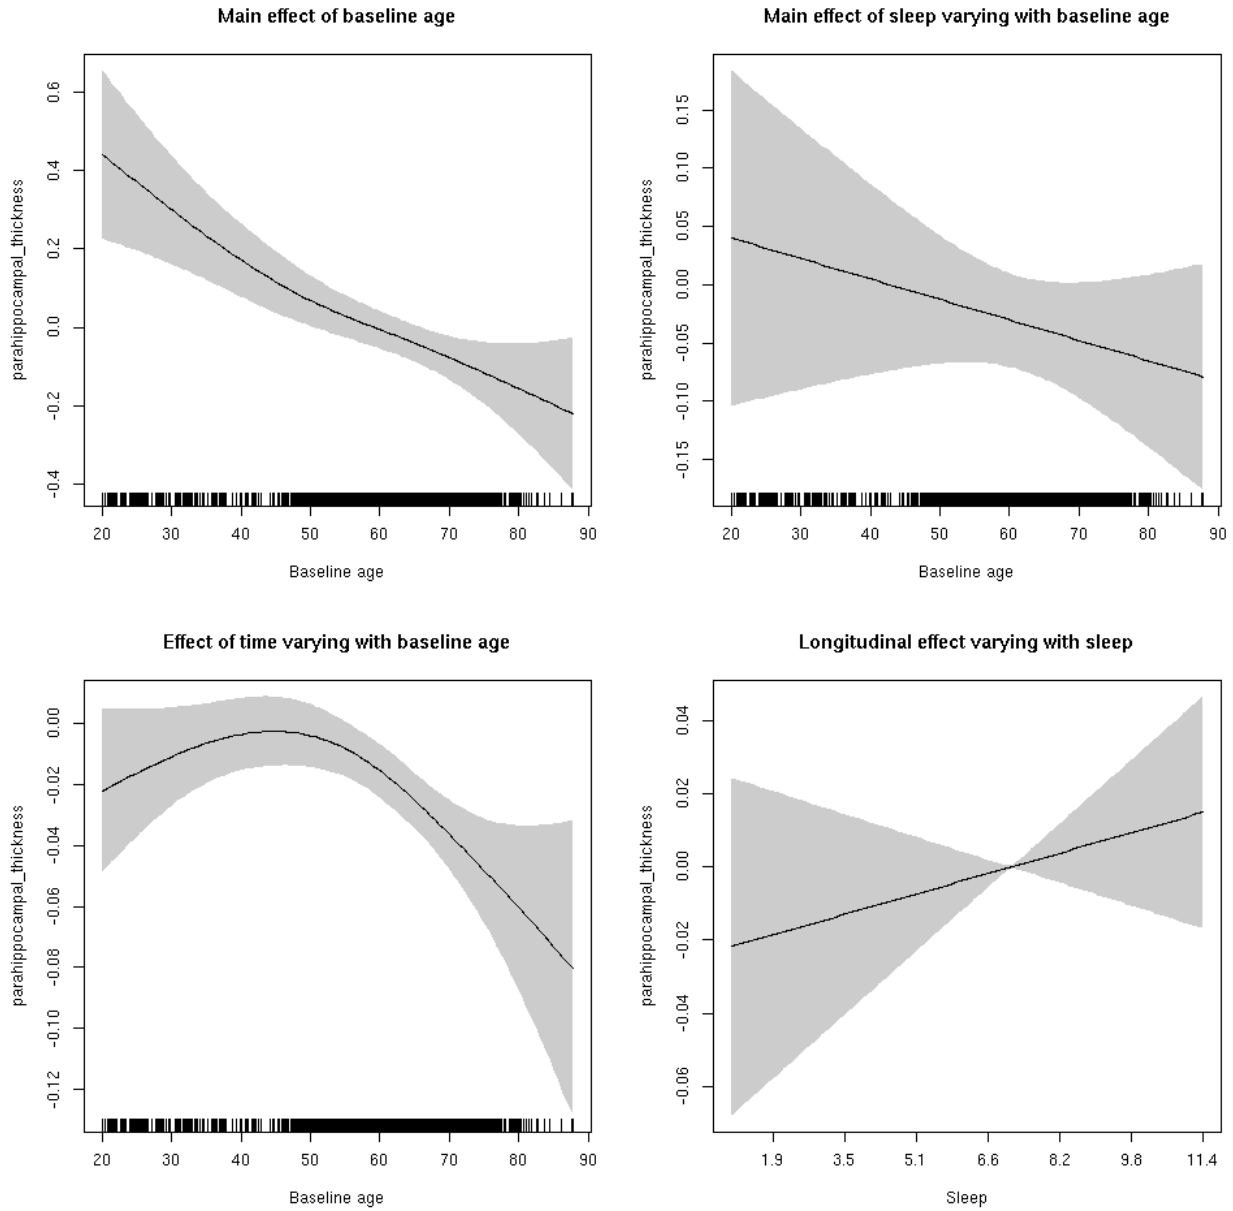

**Male: Full data** Below is the row for `s(sleep_z):time` from the model output.

```
## s(sleep_z):time  1.000  1.000  0.530  0.4666
```

Below are plots of a plot of `s(bl_age)`, `s(bl_age):sleep_z`, `s(bl_age):time`, and `s(sleep_z):time`. For `s(sleep_z):time`, roughly, if we cannot fit a straight line through the confidence bands, there is evidence that the effect of time depends on sleep duration. It is correct that the confidence interval is zero at one point along the axis; this happens because we do not include the main effect.

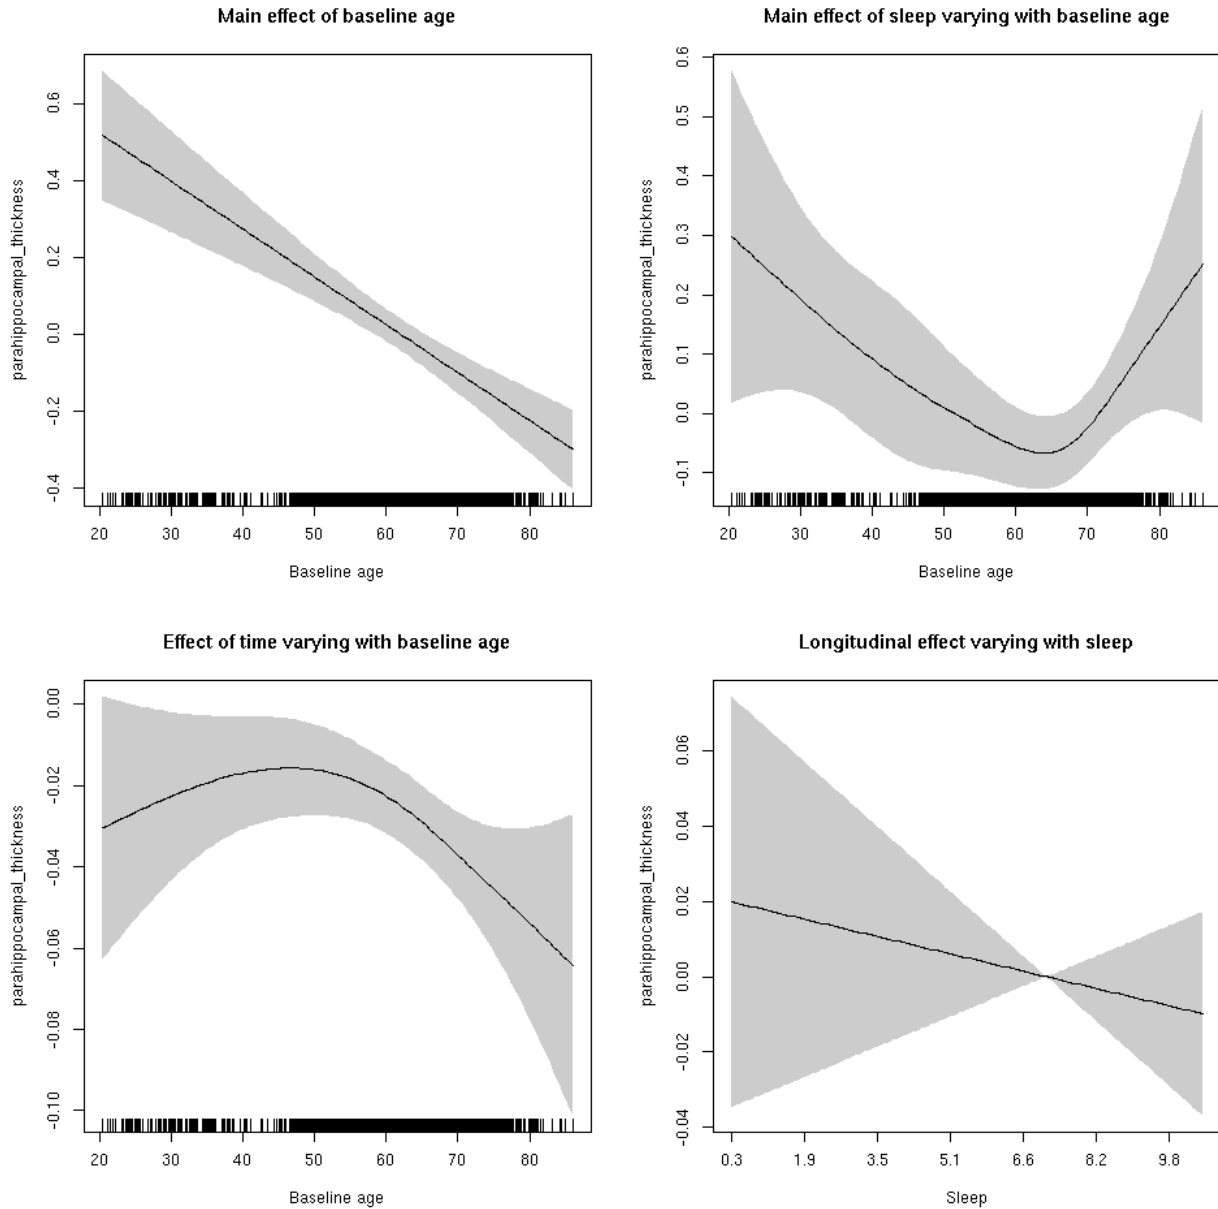

## parahippocampal\_thickness

**Full data** Below is the model output. The term `s(sleep_z):time` is probably what we care most about.

```
##
## Family: gaussian
## Link function: identity
##
## Formula:
## value ~ sex + site + s(bl_age, k = 10, bs = "cr") + s(bl_age,
##   by = sleep_z, bs = "cr") + +s(bl_age, by = time, k = 5, bs = "cr") +
##   s(sleep_z, by = time, k = 5, bs = "cr", pc = 0)
## <environment: 0x5630035d2ce8>
```

```

##
## Parametric coefficients:
##           Estimate Std. Error t value Pr(>|t|)
## (Intercept) -0.303939  0.055674  -5.459 4.92e-08 ***
## sexmale     -0.309006  0.028672 -10.777 < 2e-16 ***
## siteousAvanto -0.071426  0.074869  -0.954  0.3401
## siteousPrisma  0.181506  0.257583   0.705  0.4810
## siteousSkyra  0.392405  0.074757   5.249 1.57e-07 ***
## siteUB       0.027298  0.152230   0.179  0.8577
## siteUCAM     0.178302  0.077556   2.299  0.0215 *
## siteUKB     0.557058  0.055205  10.091 < 2e-16 ***
## siteUmU     -0.009677  0.093423  -0.104  0.9175
## ---
## Signif. codes:  0 '***' 0.001 '**' 0.01 '*' 0.05 '.' 0.1 ' ' 1
##
## Approximate significance of smooth terms:
##           edf Ref.df    F p-value
## s(bl_age)      1.000  1.000 57.308 <2e-16 ***
## s(bl_age):sleep_z 3.493  3.493  2.645  0.024 *
## s(bl_age):time  3.400  3.400 30.612 <2e-16 ***
## s(sleep_z):time  1.000  1.000  0.060  0.806
## ---
## Signif. codes:  0 '***' 0.001 '**' 0.01 '*' 0.05 '.' 0.1 ' ' 1
##
## R-sq.(adj) =  0.104
## lmer.REML = 15508  Scale est. = 0.10678  n = 8166

```

Below are plots of a plot of `s(bl_age)`, `s(bl_age):sleep_z`, `s(bl_age):time`, and `s(sleep_z):time`. For `s(sleep_z):time`, roughly, if we cannot fit a straight line through the confidence bands, there is evidence that the effect of time depends on sleep duration. It is correct that the confidence interval is zero at one point along the axis; this happens because we do not include the main effect.

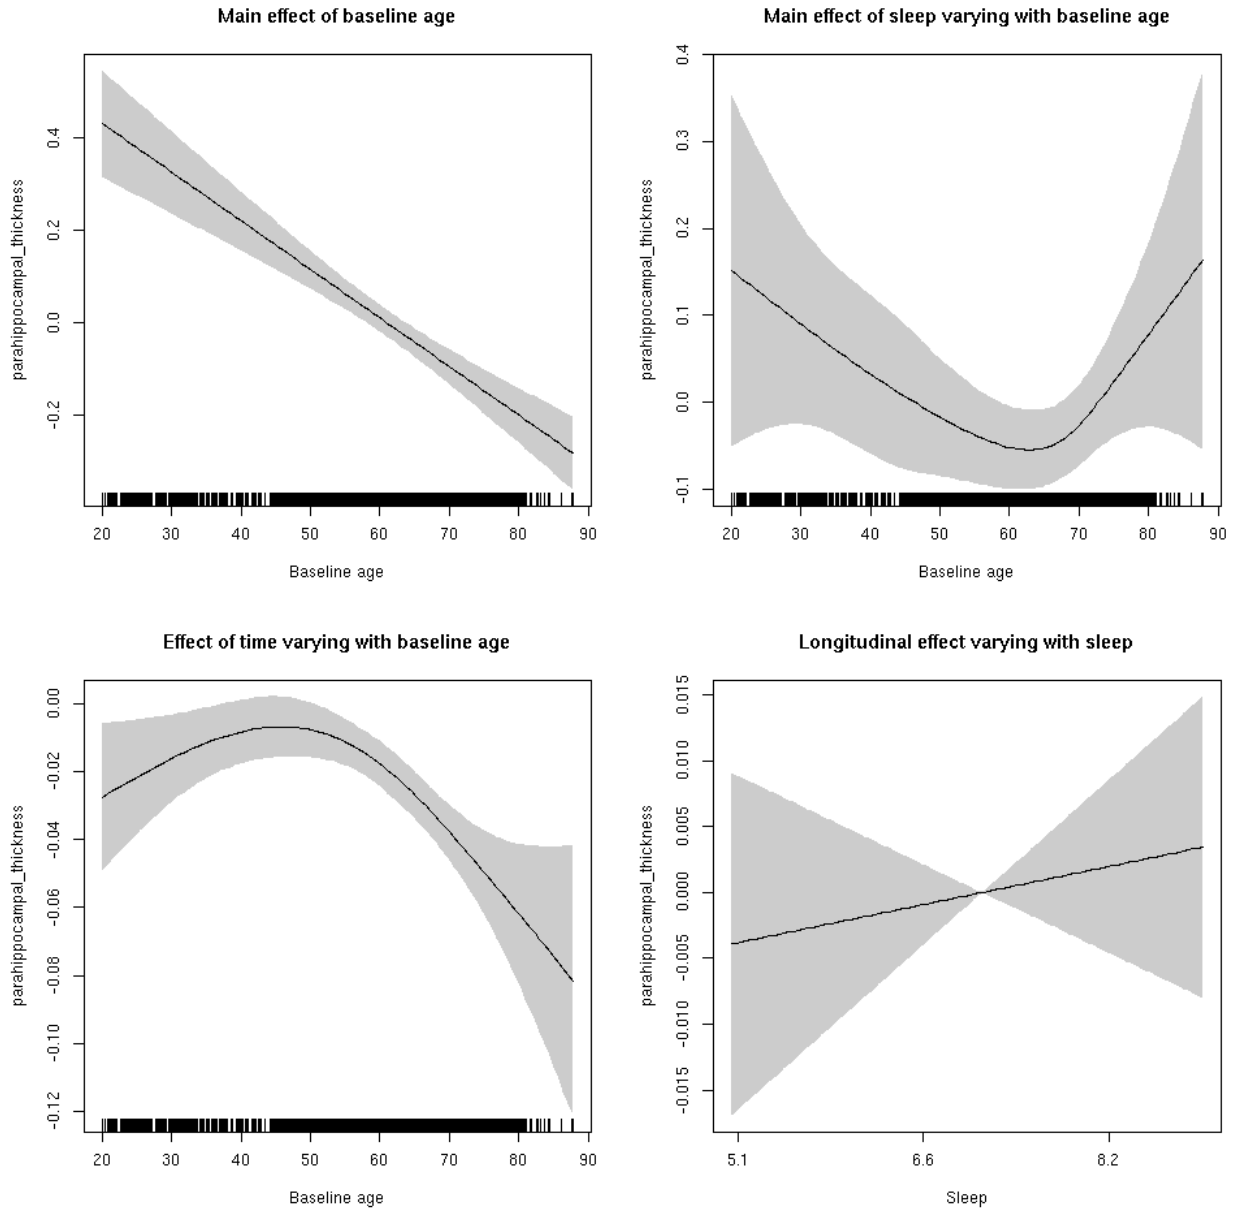

**Restricted to sleep  $\geq 5$  and  $\leq 9$  hours** Below is the row for `s(sleep_z):time` from the model output.

```
## s(sleep_z):time  1.000  1.000  0.363  0.5469
```

Below are plots of a plot of `s(bl_age)`, `s(bl_age):sleep_z`, `s(bl_age):time`, and `s(sleep_z):time`. For `s(sleep_z):time`, roughly, if we cannot fit a straight line through the confidence bands, there is evidence that the effect of time depends on sleep duration. It is correct that the confidence interval is zero at one point along the axis; this happens because we do not include the main effect.



## parahippocampal\_volume: Stratified by sex

**Female: Full data** Below is the row for `s(sleep_z):time` from the model output.

```
## s(sleep_z):time  1.000  1.000  1.843  0.1747
```

Below are plots of a plot of `s(bl_age)`, `s(bl_age):sleep_z`, `s(bl_age):time`, and `s(sleep_z):time`. For `s(sleep_z):time`, roughly, if we cannot fit a straight line through the confidence bands, there is evidence that the effect of time depends on sleep duration. It is correct that the confidence interval is zero at one point along the axis; this happens because we do not include the main effect.

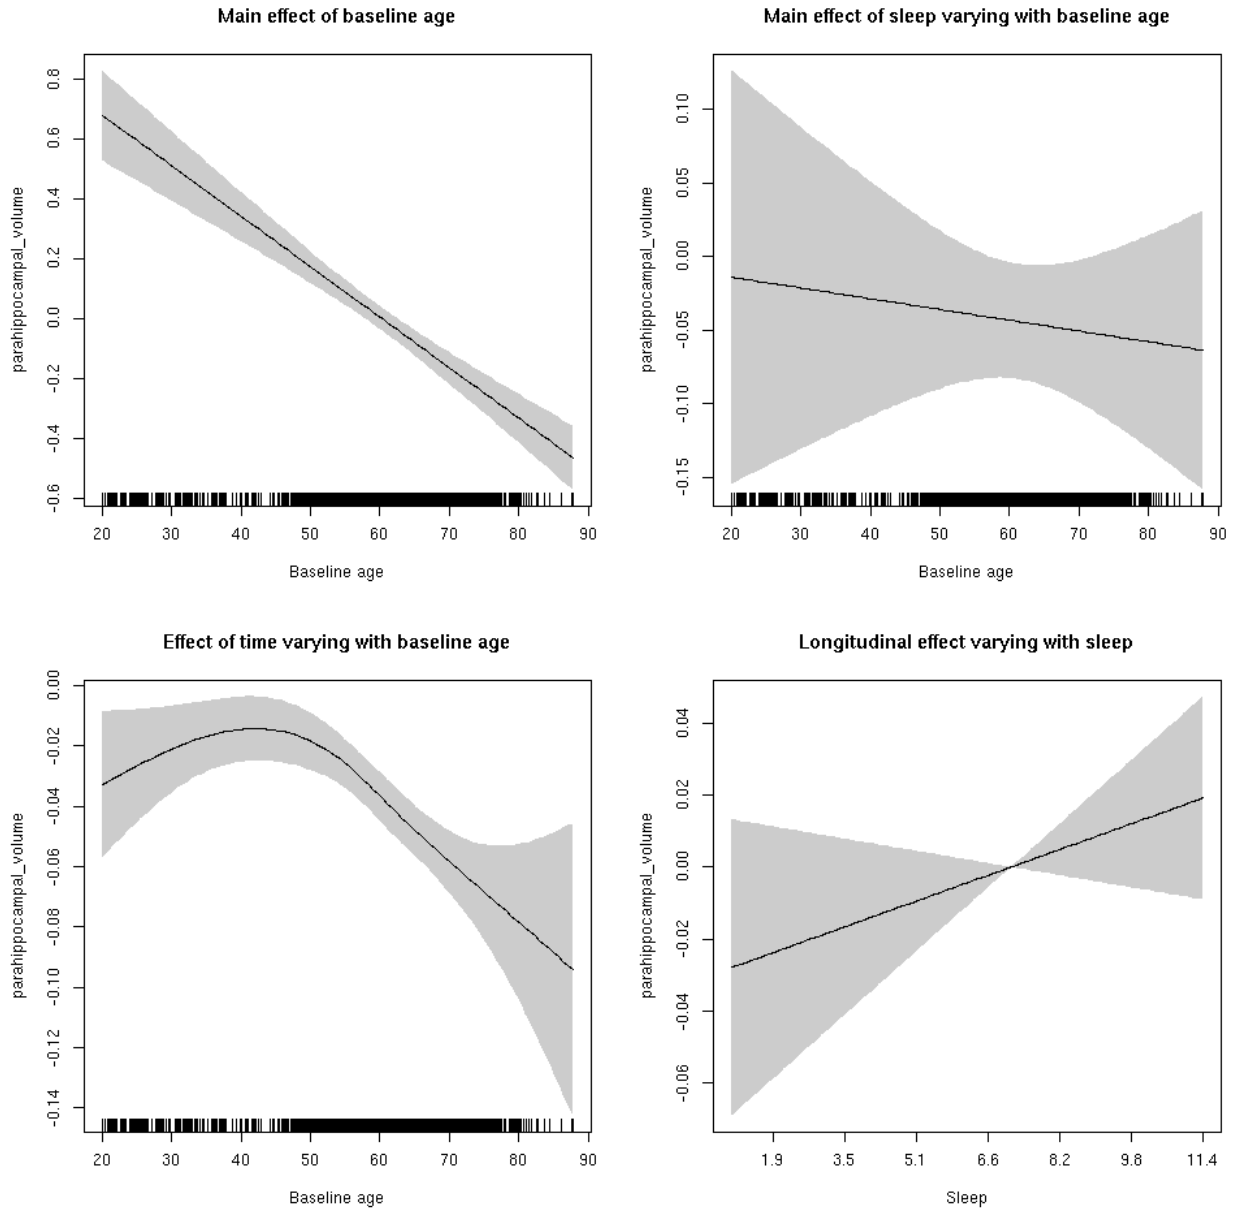

**Male: Full data** Below is the row for `s(sleep_z):time` from the model output.

```
## s(sleep_z):time  1.000  1.000  0.728  0.3934
```

Below are plots of a plot of `s(bl_age)`, `s(bl_age):sleep_z`, `s(bl_age):time`, and `s(sleep_z):time`. For `s(sleep_z):time`, roughly, if we cannot fit a straight line through the confidence bands, there is evidence that the effect of time depends on sleep duration. It is correct that the confidence interval is zero at one point along the axis; this happens because we do not include the main effect.

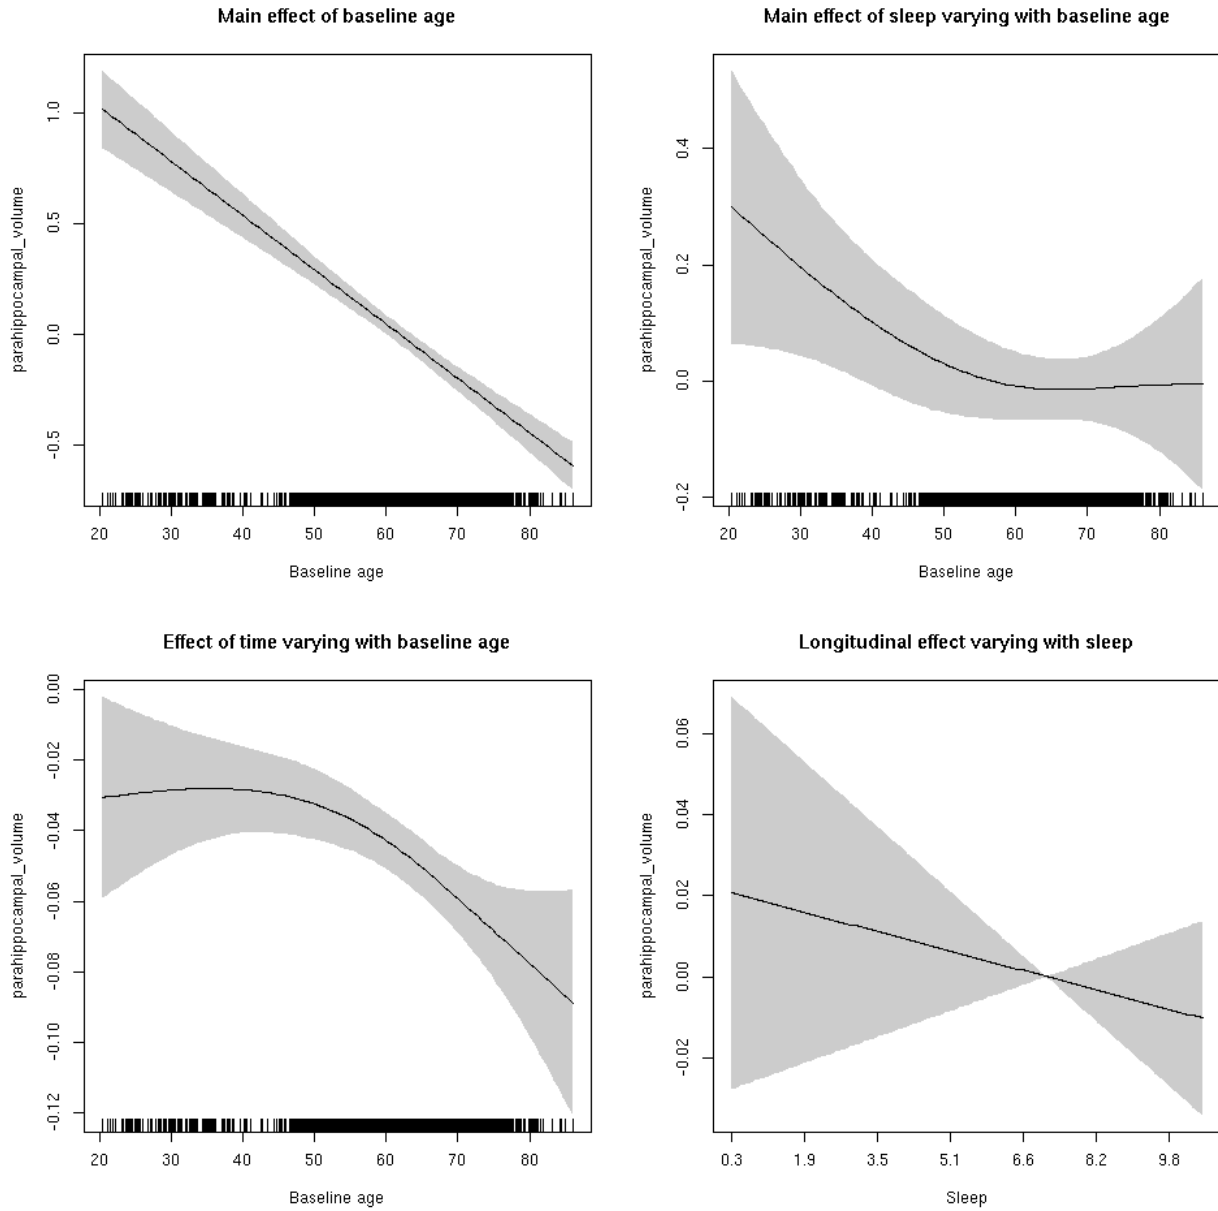

## parahippocampal\_volume

**Full data** Below is the model output. The term `s(sleep_z):time` is probably what we care most about.

```
##
## Family: gaussian
## Link function: identity
##
## Formula:
## value ~ sex + site + icv + s(bl_age, k = 10, bs = "cr") + s(bl_age,
##   by = sleep_z, bs = "cr") + +s(bl_age, by = time, k = 5, bs = "cr") +
##   s(sleep_z, by = time, k = 5, bs = "cr", pc = 0)
## <environment: 0x5630035aedb8>
```



```

##
## Parametric coefficients:
##           Estimate Std. Error t value Pr(>|t|)
## (Intercept)  0.45146   0.06731   6.707 2.12e-11 ***
## sexmale      -0.06012   0.03495  -1.720 0.085425 .
## siteousAvanto -0.41889   0.08335  -5.026 5.12e-07 ***
## siteousPrisma -0.35474   0.23658  -1.499 0.133796
## siteousSkyra  0.25745   0.08058   3.195 0.001403 **
## siteUB       -0.40486   0.15580  -2.599 0.009378 **
## siteUCAM     -0.31028   0.08369  -3.707 0.000211 ***
## siteUKB      -0.33158   0.06268  -5.290 1.25e-07 ***
## siteUmU      -0.18202   0.09649  -1.887 0.059262 .
## icv          0.29018   0.01726  16.815 < 2e-16 ***
## ---
## Signif. codes:  0 '***' 0.001 '**' 0.01 '*' 0.05 '.' 0.1 ' ' 1
##
## Approximate significance of smooth terms:
##           edf Ref.df      F p-value
## s(bl_age)      1.000  1.000 225.322 <2e-16 ***
## s(bl_age):sleep_z 2.417  2.417   2.503   0.112
## s(bl_age):time  3.530  3.530 106.391 <2e-16 ***
## s(sleep_z):time  1.000  1.000   0.254   0.615
## ---
## Signif. codes:  0 '***' 0.001 '**' 0.01 '*' 0.05 '.' 0.1 ' ' 1
##
## R-sq.(adj) =  0.177
## lmer.REML = 14603  Scale est. = 0.084234  n = 8175

```

Below are plots of a plot of `s(bl_age)`, `s(bl_age):sleep_z`, `s(bl_age):time`, and `s(sleep_z):time`. For `s(sleep_z):time`, roughly, if we cannot fit a straight line through the confidence bands, there is evidence that the effect of time depends on sleep duration. It is correct that the confidence interval is zero at one point along the axis; this happens because we do not include the main effect.

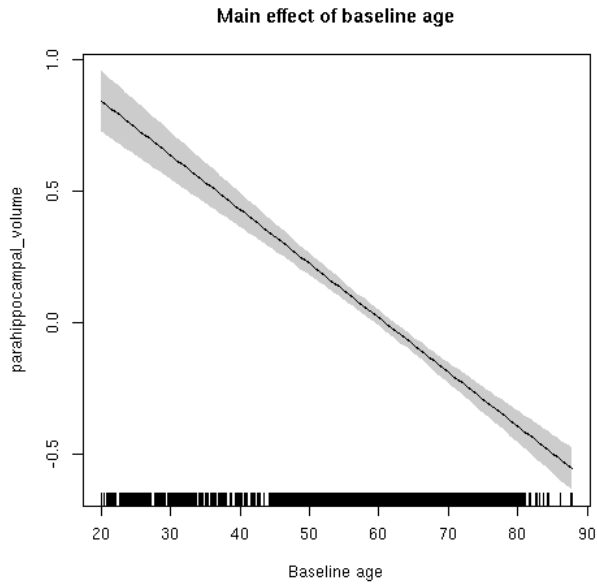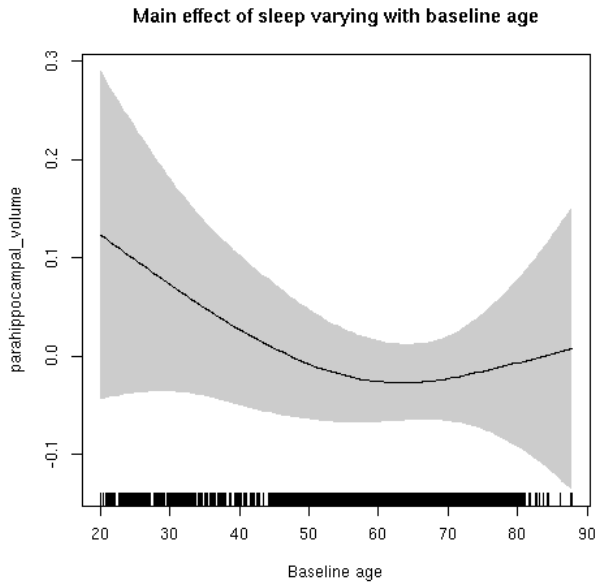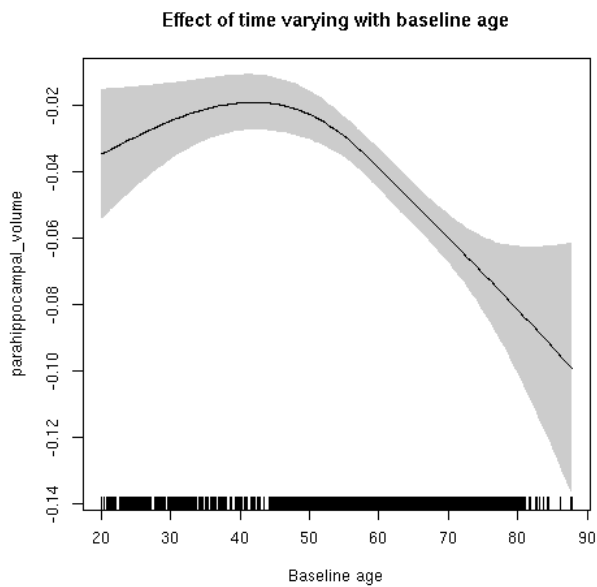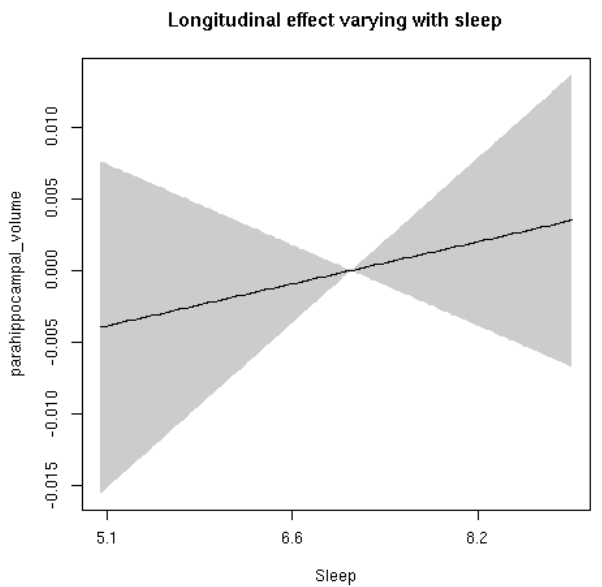

**Restricted to sleep  $\geq 5$  and  $\leq 9$  hours** Below is the row for `s(sleep_z):time` from the model output.

```
## s(sleep_z):time 1.000 1.000 0.467 0.494
```

Below are plots of a plot of `s(bl_age)`, `s(bl_age):sleep_z`, `s(bl_age):time`, and `s(sleep_z):time`. For `s(sleep_z):time`, roughly, if we cannot fit a straight line through the confidence bands, there is evidence that the effect of time depends on sleep duration. It is correct that confidence interval is zero at one point along the axis; this happens because we do not include the main effect.

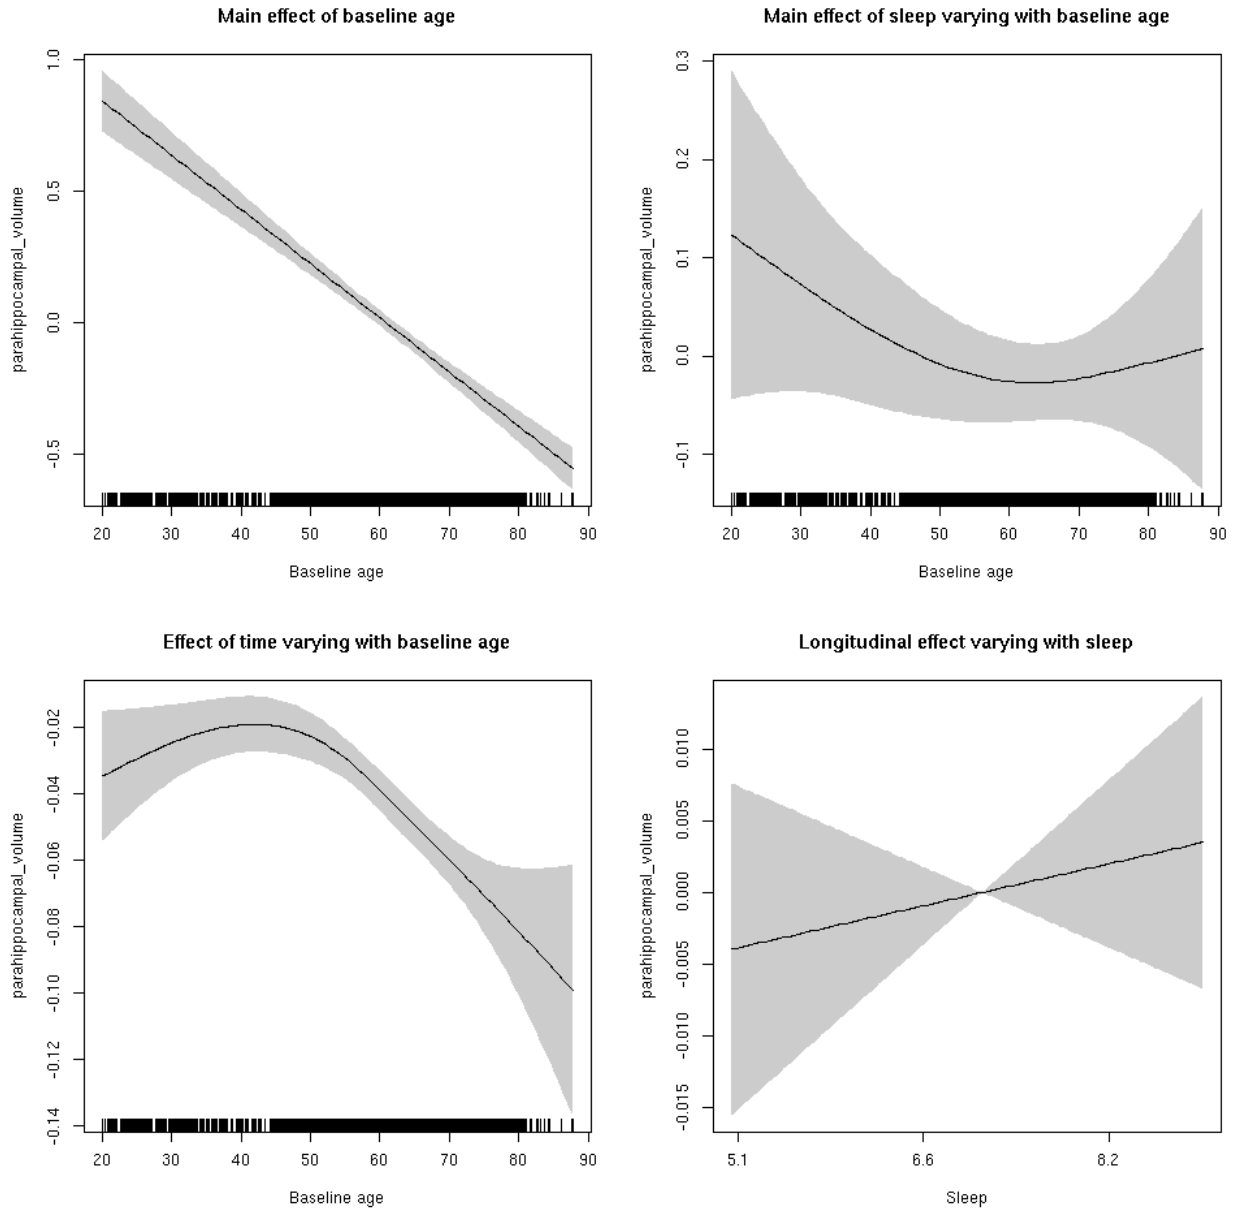

### parsopectularis\_area: Stratified by sex

**Female: Full data** Below is the row for `s(sleep_z):time` from the model output.

```
## s(sleep_z):time  3.13  3.13  1.935  0.304
```

Below are plots of a plot of `s(bl_age)`, `s(bl_age):sleep_z`, `s(bl_age):time`, and `s(sleep_z):time`. For `s(sleep_z):time`, roughly, if we cannot fit a straight line through the confidence bands, there is evidence that the effect of time depends on sleep duration. It is correct that the confidence interval is zero at one point along the axis; this happens because we do not include the main effect.

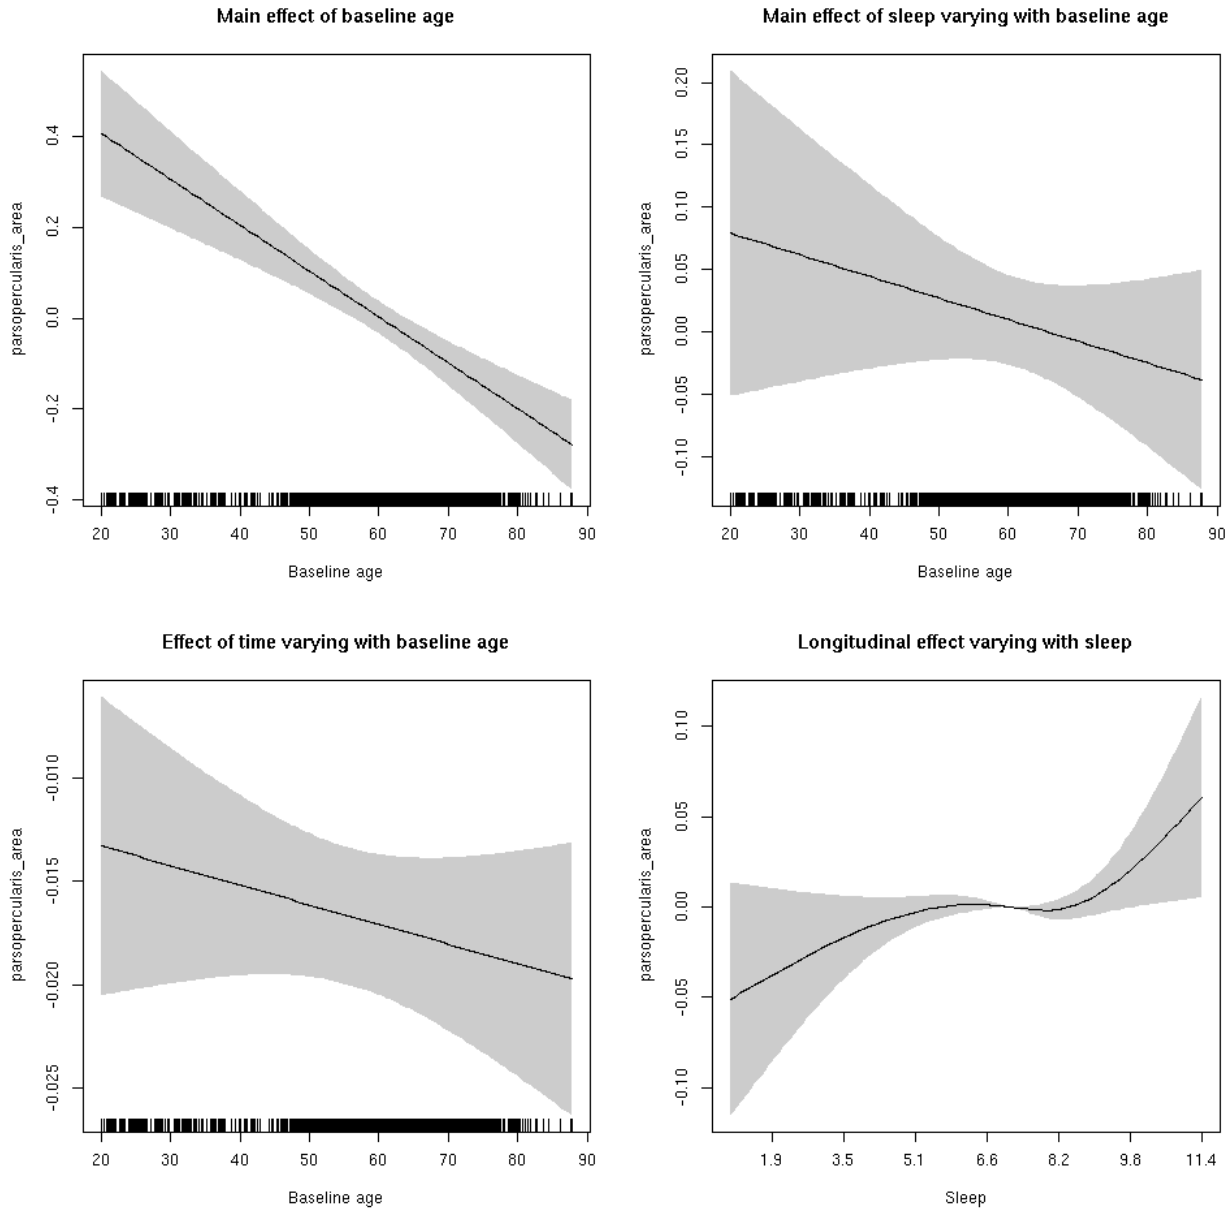

**Male: Full data** Below is the row for `s(sleep_z):time` from the model output.

```
## s(sleep_z):time  1.000  1.000  2.504  0.114
```

Below are plots of a plot of `s(bl_age)`, `s(bl_age):sleep_z`, `s(bl_age):time`, and `s(sleep_z):time`. For `s(sleep_z):time`, roughly, if we cannot fit a straight line through the confidence bands, there is evidence that the effect of time depends on sleep duration. It is correct that the confidence interval is zero at one point along the axis; this happens because we do not include the main effect.

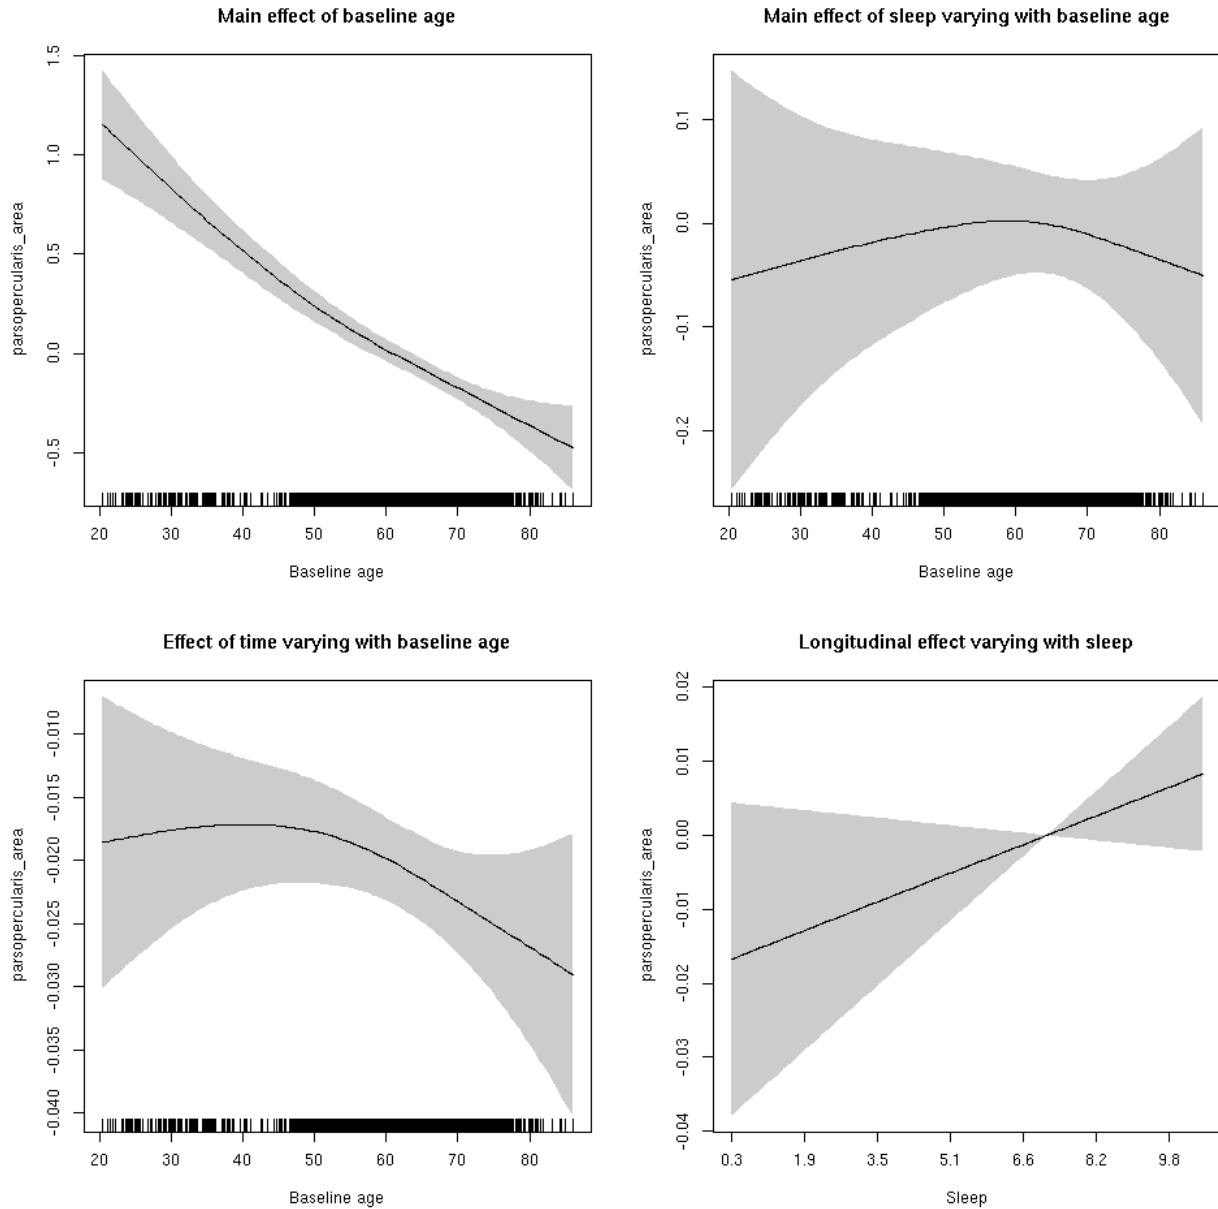

## parsopercularis\_area

**Full data** Below is the model output. The term `s(sleep_z):time` is probably what we care most about.

```
##
## Family: gaussian
## Link function: identity
##
## Formula:
## value ~ sex + site + icv + s(bl_age, k = 10, bs = "cr") + s(bl_age,
##   by = sleep_z, bs = "cr") + +s(bl_age, by = time, k = 5, bs = "cr") +
##   s(sleep_z, by = time, k = 5, bs = "cr", pc = 0)
## <environment: 0x5630035a5618>
```

```

##
## Parametric coefficients:
##           Estimate Std. Error t value Pr(>|t|)
## (Intercept)  0.68786   0.06331  10.866 < 2e-16 ***
## sexmale      0.10756   0.03291   3.268 0.00109 **
## siteousAvanto -0.62295   0.07790  -7.997 1.45e-15 ***
## siteousPrisma -0.35521   0.12334  -2.880 0.00399 **
## siteousSkyra  -0.30462   0.07555  -4.032 5.58e-05 ***
## siteUB       -0.77744   0.14888  -5.222 1.81e-07 ***
## siteUCAM     -0.80391   0.07933 -10.133 < 2e-16 ***
## siteUKB      -0.70175   0.05916 -11.861 < 2e-16 ***
## siteUmU      -0.13663   0.09158  -1.492 0.13575
## icv          0.46318   0.01584  29.238 < 2e-16 ***
## ---
## Signif. codes:  0 '***' 0.001 '**' 0.01 '*' 0.05 '.' 0.1 ' ' 1
##
## Approximate significance of smooth terms:
##           edf Ref.df      F p-value
## s(bl_age)      1.000  1.000 166.142 <2e-16 ***
## s(bl_age):sleep_z 2.798  2.798   0.677   0.455
## s(bl_age):time  2.892  2.892 126.714 <2e-16 ***
## s(sleep_z):time  1.000  1.000   2.231   0.135
## ---
## Signif. codes:  0 '***' 0.001 '**' 0.01 '*' 0.05 '.' 0.1 ' ' 1
##
## R-sq.(adj) =  0.305
## lmer.REML =  6712  Scale est. = 0.014591  n = 8154

```

Below are plots of a plot of `s(bl_age)`, `s(bl_age):sleep_z`, `s(bl_age):time`, and `s(sleep_z):time`. For `s(sleep_z):time`, roughly, if we cannot fit a straight line through the confidence bands, there is evidence that the effect of time depends on sleep duration. It is correct that the confidence interval is zero at one point along the axis; this happens because we do not include the main effect.

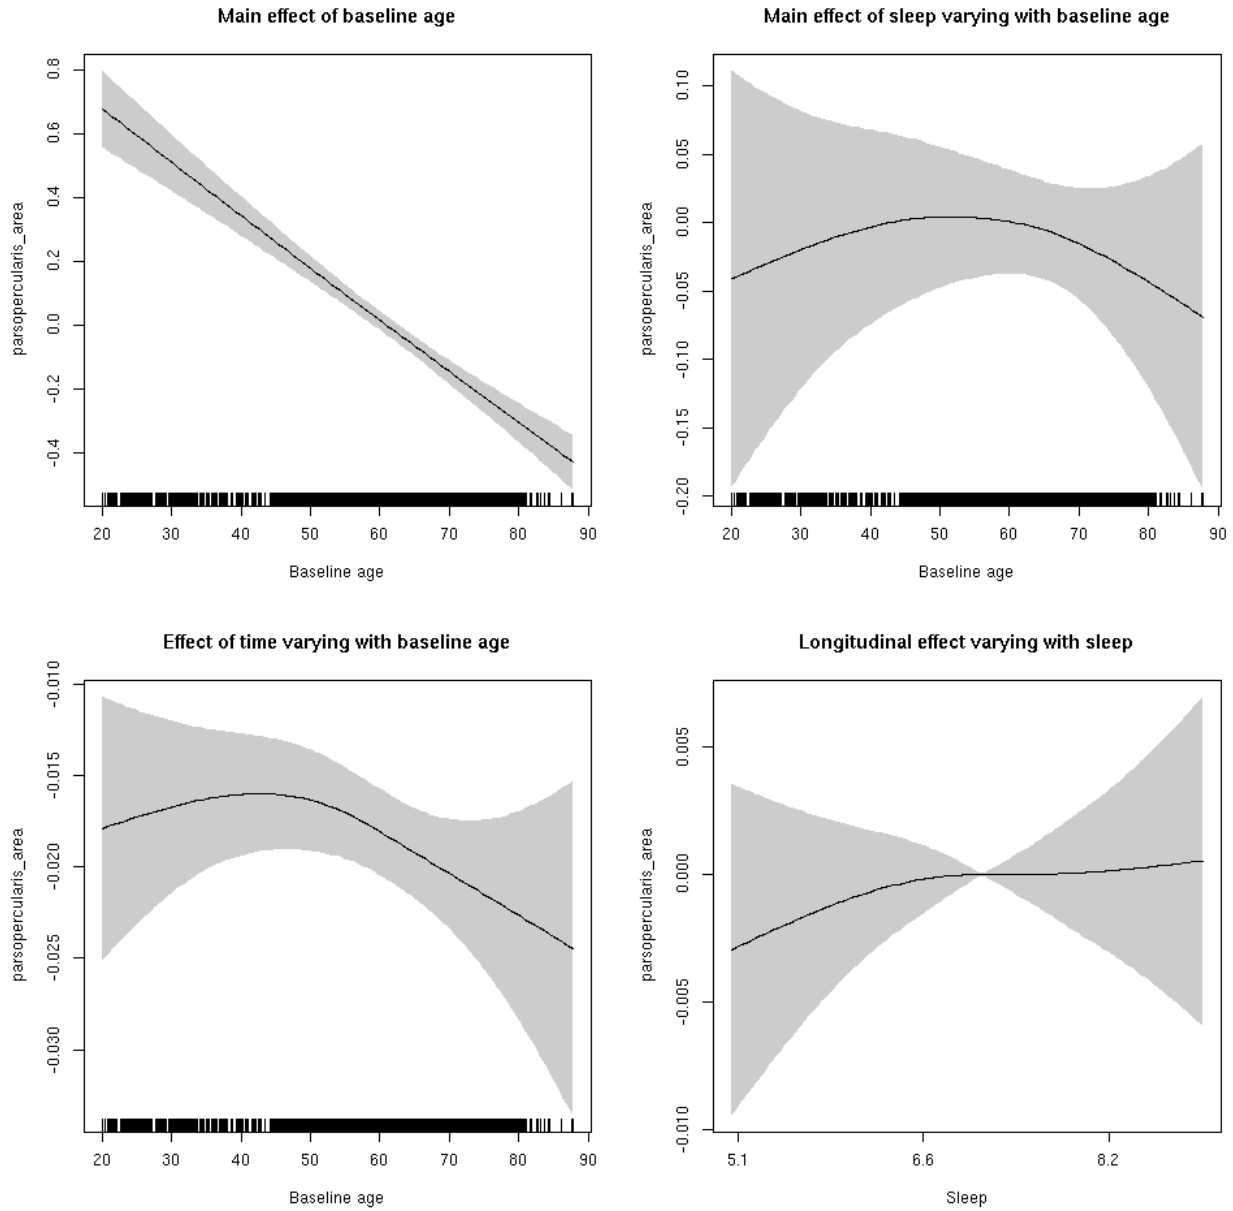

**Restricted to sleep  $\geq 5$  and  $\leq 9$  hours** Below is the row for `s(sleep_z):time` from the model output.

```
## s(sleep_z):time  1.407  1.407  0.478  0.681
```

Below are plots of a plot of `s(bl_age)`, `s(bl_age):sleep_z`, `s(bl_age):time`, and `s(sleep_z):time`. For `s(sleep_z):time`, roughly, if we cannot fit a straight line through the confidence bands, there is evidence that the effect of time depends on sleep duration. It is correct that the confidence interval is zero at one point along the axis; this happens because we do not include the main effect.



### parsopercularis\_thickness: Stratified by sex

**Female: Full data** Below is the row for `s(sleep_z):time` from the model output.

```
## s(sleep_z):time  1.000  1.000  0.001  0.980
```

Below are plots of a plot of `s(bl_age)`, `s(bl_age):sleep_z`, `s(bl_age):time`, and `s(sleep_z):time`. For `s(sleep_z):time`, roughly, if we cannot fit a straight line through the confidence bands, there is evidence that the effect of time depends on sleep duration. It is correct that the confidence interval is zero at one point along the axis; this happens because we do not include the main effect.



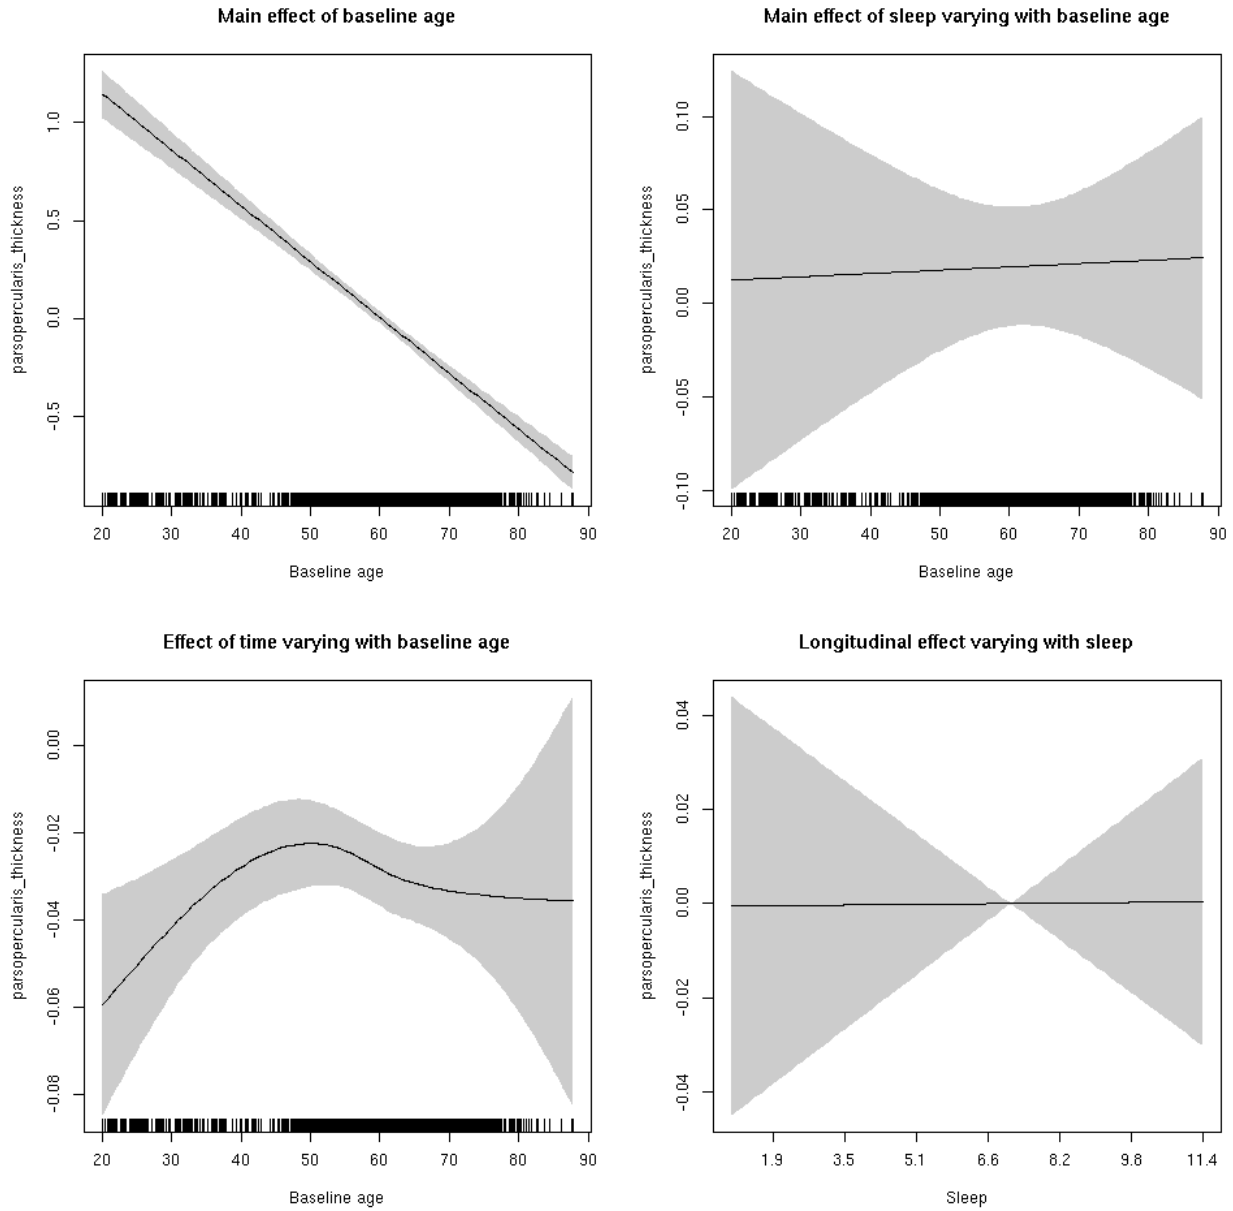

**Male: Full data** Below is the row for `s(sleep_z):time` from the model output.

```
## s(sleep_z):time  2.113  2.113  2.000  0.102
```

Below are plots of a plot of `s(bl_age)`, `s(bl_age):sleep_z`, `s(bl_age):time`, and `s(sleep_z):time`. For `s(sleep_z):time`, roughly, if we cannot fit a straight line through the confidence bands, there is evidence that the effect of time depends on sleep duration. It is correct that the confidence interval is zero at one point along the axis; this happens because we do not include the main effect.

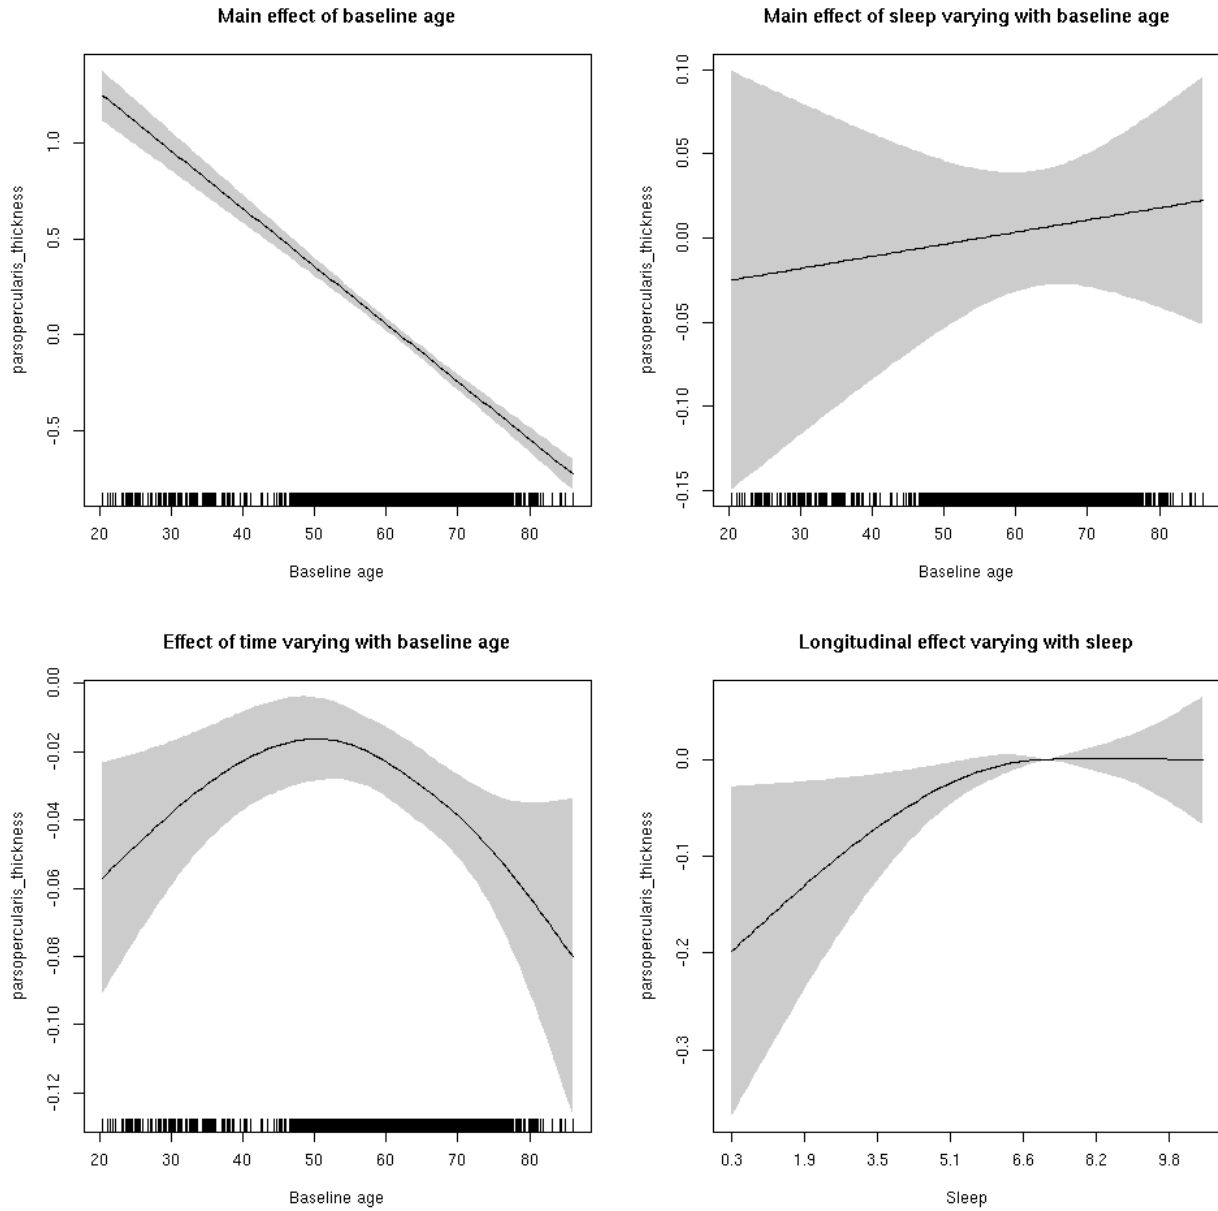

## parsopercularis\_thickness

**Full data** Below is the model output. The term `s(sleep_z):time` is probably what we care most about.

```
##
## Family: gaussian
## Link function: identity
##
## Formula:
## value ~ sex + site + s(bl_age, k = 10, bs = "cr") + s(bl_age,
##   by = sleep_z, bs = "cr") + +s(bl_age, by = time, k = 5, bs = "cr") +
##   s(sleep_z, by = time, k = 5, bs = "cr", pc = 0)
## <environment: 0x5630035da000>
```

```

##
## Parametric coefficients:
##           Estimate Std. Error t value Pr(>|t|)
## (Intercept) -1.80233    0.04297 -41.946 < 2e-16 ***
## sexmale      0.09600    0.02208   4.347 1.40e-05 ***
## siteousAvanto 0.06309    0.05833   1.082 0.279477
## siteousPrisma 0.26362    0.24474   1.077 0.281443
## siteousSkyra -0.05524    0.05820  -0.949 0.342611
## siteUB       0.38125    0.11668   3.267 0.001090 **
## siteUCAM     0.29054    0.05976   4.862 1.18e-06 ***
## siteUKB      2.07137    0.04259  48.631 < 2e-16 ***
## siteUmU     -0.26199    0.07206  -3.636 0.000279 ***
## ---
## Signif. codes:  0 '***' 0.001 '**' 0.01 '*' 0.05 '.' 0.1 ' ' 1
##
## Approximate significance of smooth terms:
##           edf Ref.df      F p-value
## s(bl_age)      1.000  1.000 780.103 <2e-16 ***
## s(bl_age):sleep_z 2.000  2.000   0.602   0.548
## s(bl_age):time  3.707  3.707  47.344 <2e-16 ***
## s(sleep_z):time 1.000  1.000   1.595   0.207
## ---
## Signif. codes:  0 '***' 0.001 '**' 0.01 '*' 0.05 '.' 0.1 ' ' 1
##
## R-sq.(adj) =  0.627
## lmer.REML = 13294 Scale est. = 0.10224 n = 8168

```

Below are plots of a plot of `s(bl_age)`, `s(bl_age):sleep_z`, `s(bl_age):time`, and `s(sleep_z):time`. For `s(sleep_z):time`, roughly, if we cannot fit a straight line through the confidence bands, there is evidence that the effect of time depends on sleep duration. It is correct that the confidence interval is zero at one point along the axis; this happens because we do not include the main effect.

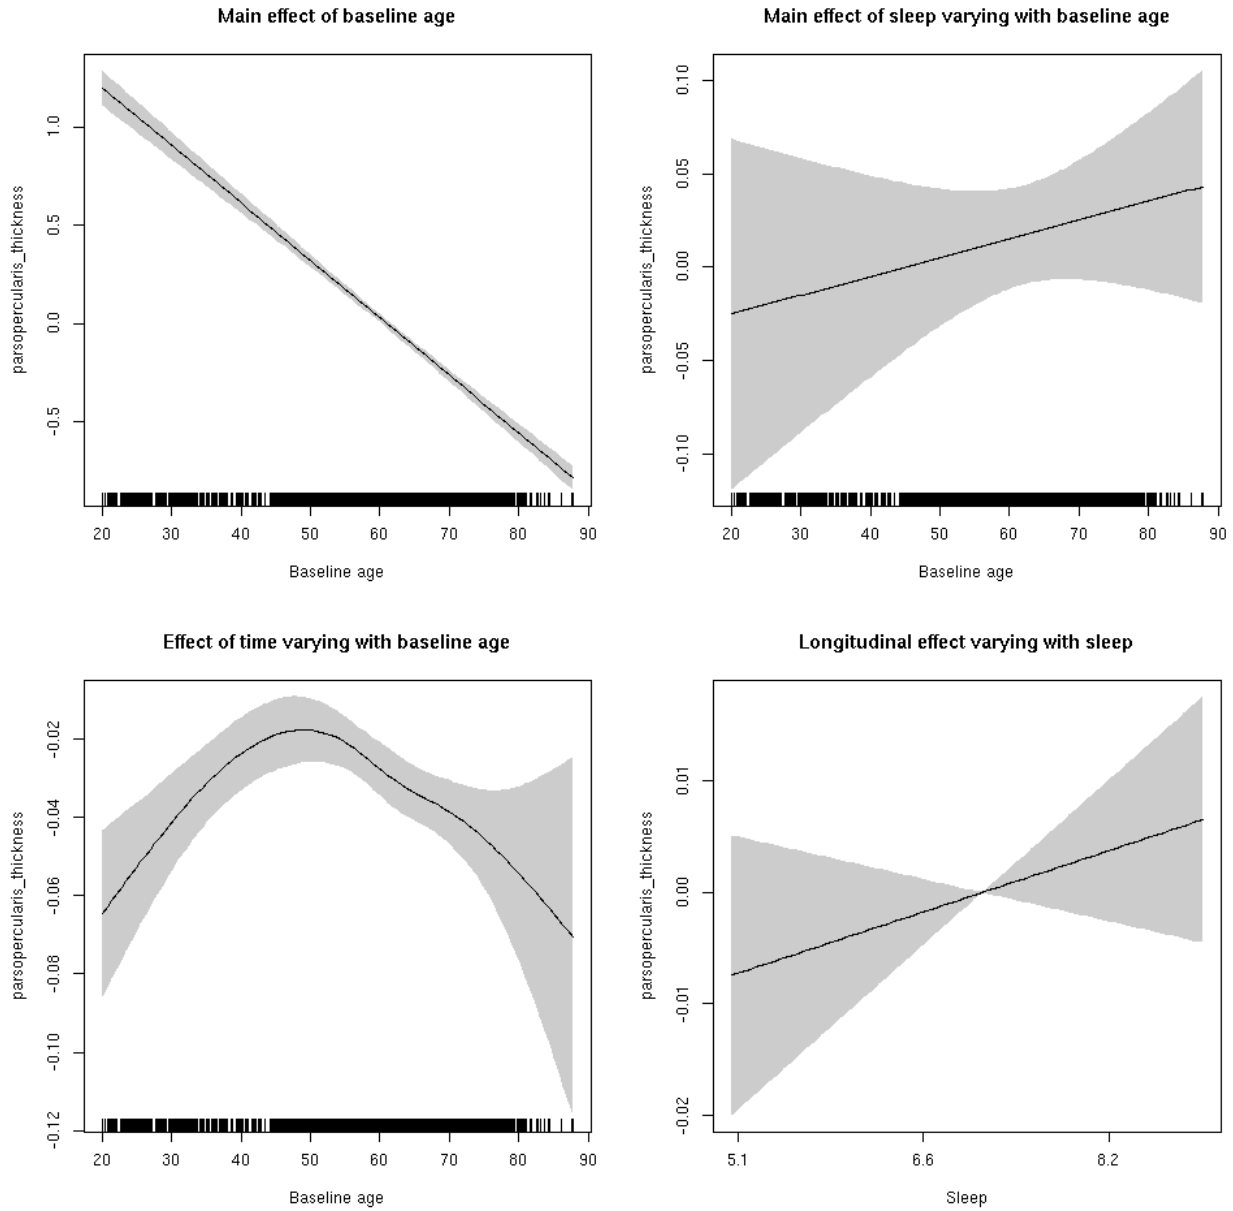

**Restricted to sleep  $\geq 5$  and  $\leq 9$  hours** Below is the row for `s(sleep_z):time` from the model output.

```
## s(sleep_z):time  1.000  1.000  1.396  0.237
```

Below are plots of a plot of `s(bl_age)`, `s(bl_age):sleep_z`, `s(bl_age):time`, and `s(sleep_z):time`. For `s(sleep_z):time`, roughly, if we cannot fit a straight line through the confidence bands, there is evidence that the effect of time depends on sleep duration. It is correct that the confidence interval is zero at one point along the axis; this happens because we do not include the main effect.

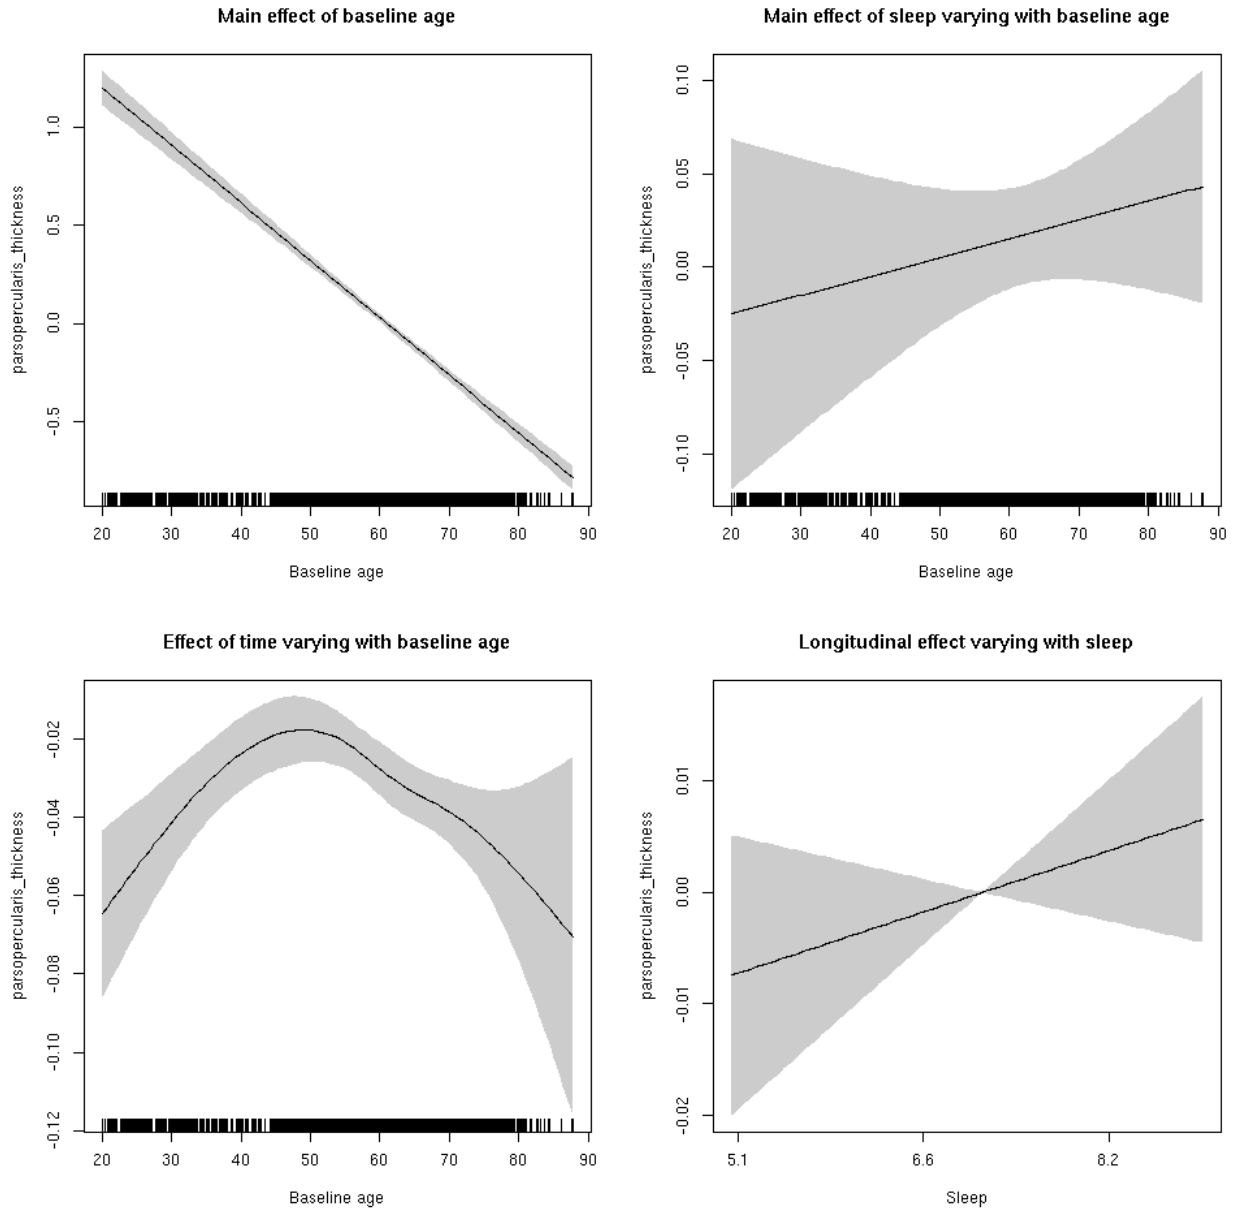

## `parsopercularis_volume`: Stratified by sex

**Female: Full data** Below is the row for `s(sleep_z):time` from the model output.

```
## s(sleep_z):time  1.000  1.000  0.043  0.835
```

Below are plots of a plot of `s(bl_age)`, `s(bl_age):sleep_z`, `s(bl_age):time`, and `s(sleep_z):time`. For `s(sleep_z):time`, roughly, if we cannot fit a straight line through the confidence bands, there is evidence that the effect of time depends on sleep duration. It is correct that the confidence interval is zero at one point along the axis; this happens because we do not include the main effect.

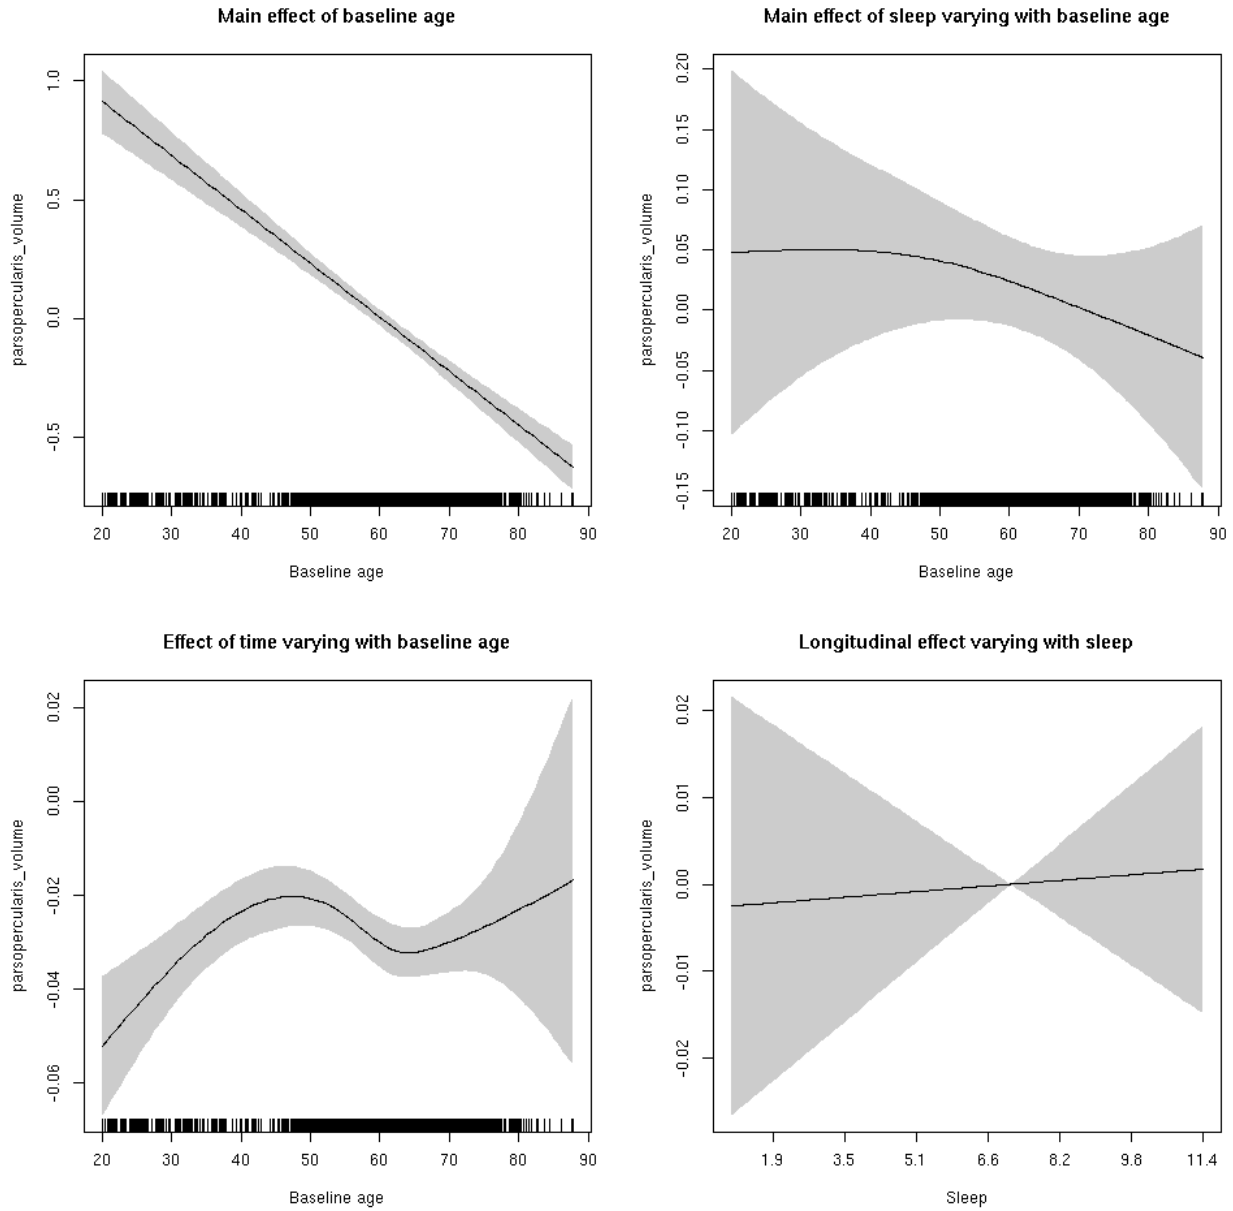

**Male: Full data** Below is the row for `s(sleep_z):time` from the model output.

```
## s(sleep_z):time  1.000  1.000  6.162  0.0131 *
```

Below are plots of a plot of `s(bl_age)`, `s(bl_age):sleep_z`, `s(bl_age):time`, and `s(sleep_z):time`. For `s(sleep_z):time`, roughly, if we cannot fit a straight line through the confidence bands, there is evidence that the effect of time depends on sleep duration. It is correct that the confidence interval is zero at one point along the axis; this happens because we do not include the main effect.

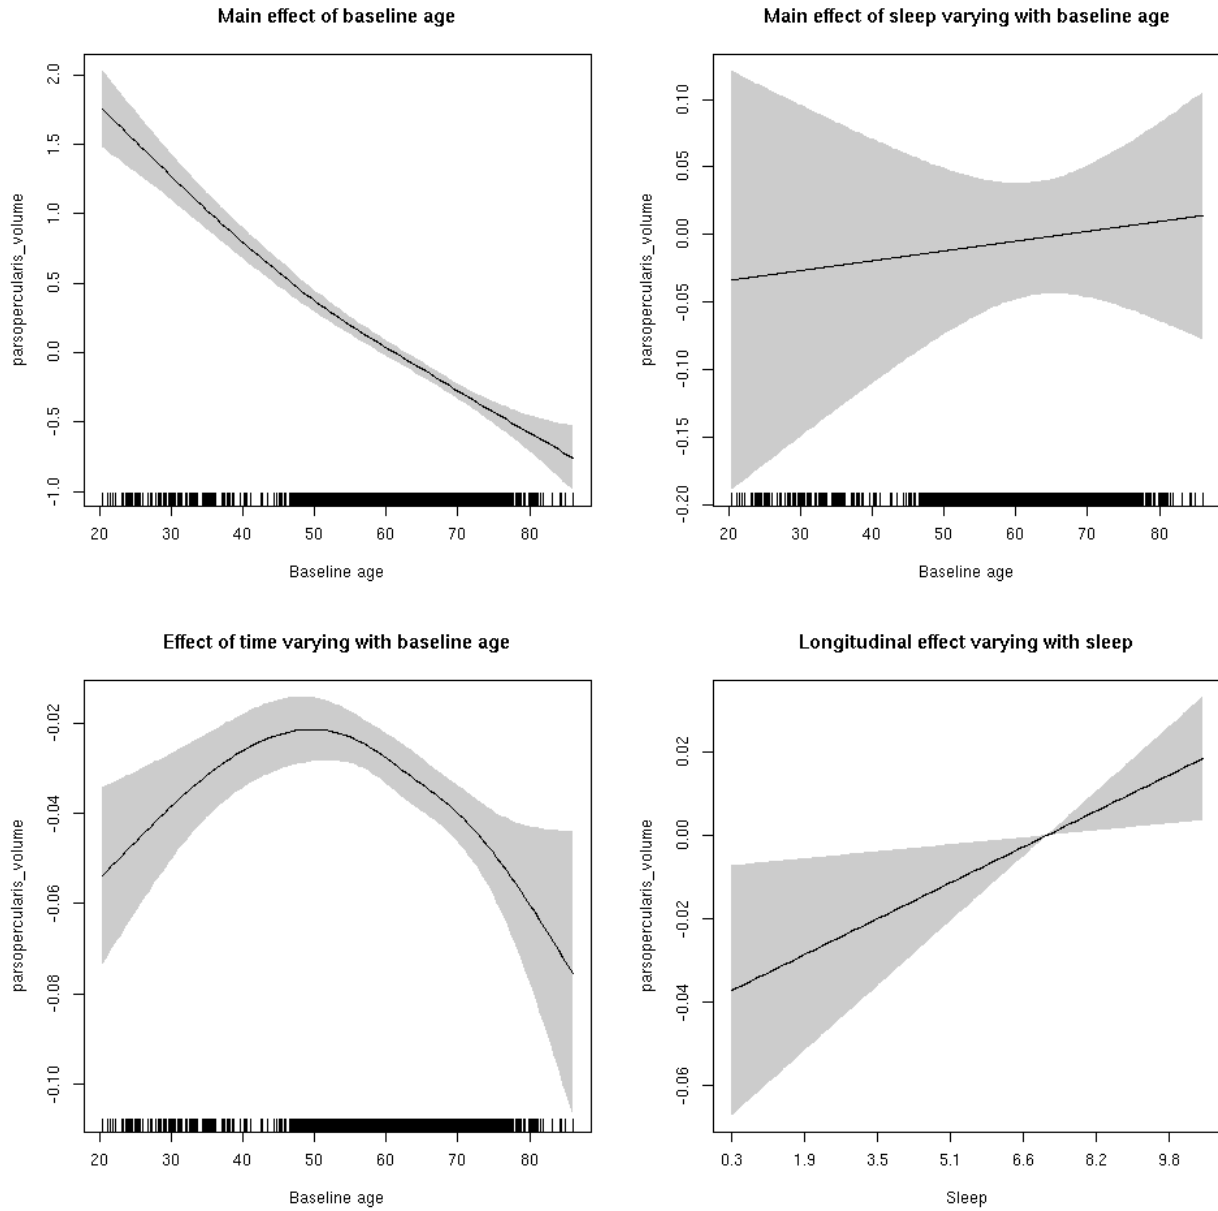

## `parsopercularis_volume`

**Full data** Below is the model output. The term `s(sleep_z):time` is probably what we care most about.

```
##
## Family: gaussian
## Link function: identity
##
## Formula:
## value ~ sex + site + icv + s(bl_age, k = 10, bs = "cr") + s(bl_age,
##   by = sleep_z, bs = "cr") + +s(bl_age, by = time, k = 5, bs = "cr") +
##   s(sleep_z, by = time, k = 5, bs = "cr", pc = 0)
## <environment: 0x5630035a3dc0>
```

```

##
## Parametric coefficients:
##           Estimate Std. Error t value Pr(>|t|)
## (Intercept) -0.04532   0.06100  -0.743 0.457569
## sexmale      0.06518   0.03150   2.069 0.038559 *
## siteousAvanto -0.66296   0.07460  -8.887 < 2e-16 ***
## siteousPrisma -0.34124   0.15376  -2.219 0.026493 *
## siteousSkyra  -0.37574   0.07224  -5.201 2.03e-07 ***
## siteUB       -0.56435   0.14131  -3.994 6.56e-05 ***
## siteUCAM     -0.64429   0.07560  -8.523 < 2e-16 ***
## siteUKB      0.20199   0.05753   3.511 0.000449 ***
## siteUmU     -0.27090   0.08735  -3.101 0.001933 **
## icv          0.45142   0.01543  29.256 < 2e-16 ***
## ---
## Signif. codes:  0 '***' 0.001 '**' 0.01 '*' 0.05 '.' 0.1 ' ' 1
##
## Approximate significance of smooth terms:
##           edf Ref.df      F p-value
## s(bl_age)      1.841  1.841 274.821 <2e-16 ***
## s(bl_age):sleep_z 2.560  2.560   0.247  0.7341
## s(bl_age):time  4.198  4.198 123.651 <2e-16 ***
## s(sleep_z):time  1.000  1.000   3.697  0.0546 .
## ---
## Signif. codes:  0 '***' 0.001 '**' 0.01 '*' 0.05 '.' 0.1 ' ' 1
##
## R-sq.(adj) =  0.385
## lmer.REML = 9383.3  Scale est. = 0.029957  n = 8163

```

Below are plots of a plot of `s(bl_age)`, `s(bl_age):sleep_z`, `s(bl_age):time`, and `s(sleep_z):time`. For `s(sleep_z):time`, roughly, if we cannot fit a straight line through the confidence bands, there is evidence that the effect of time depends on sleep duration. It is correct that the confidence interval is zero at one point along the axis; this happens because we do not include the main effect.



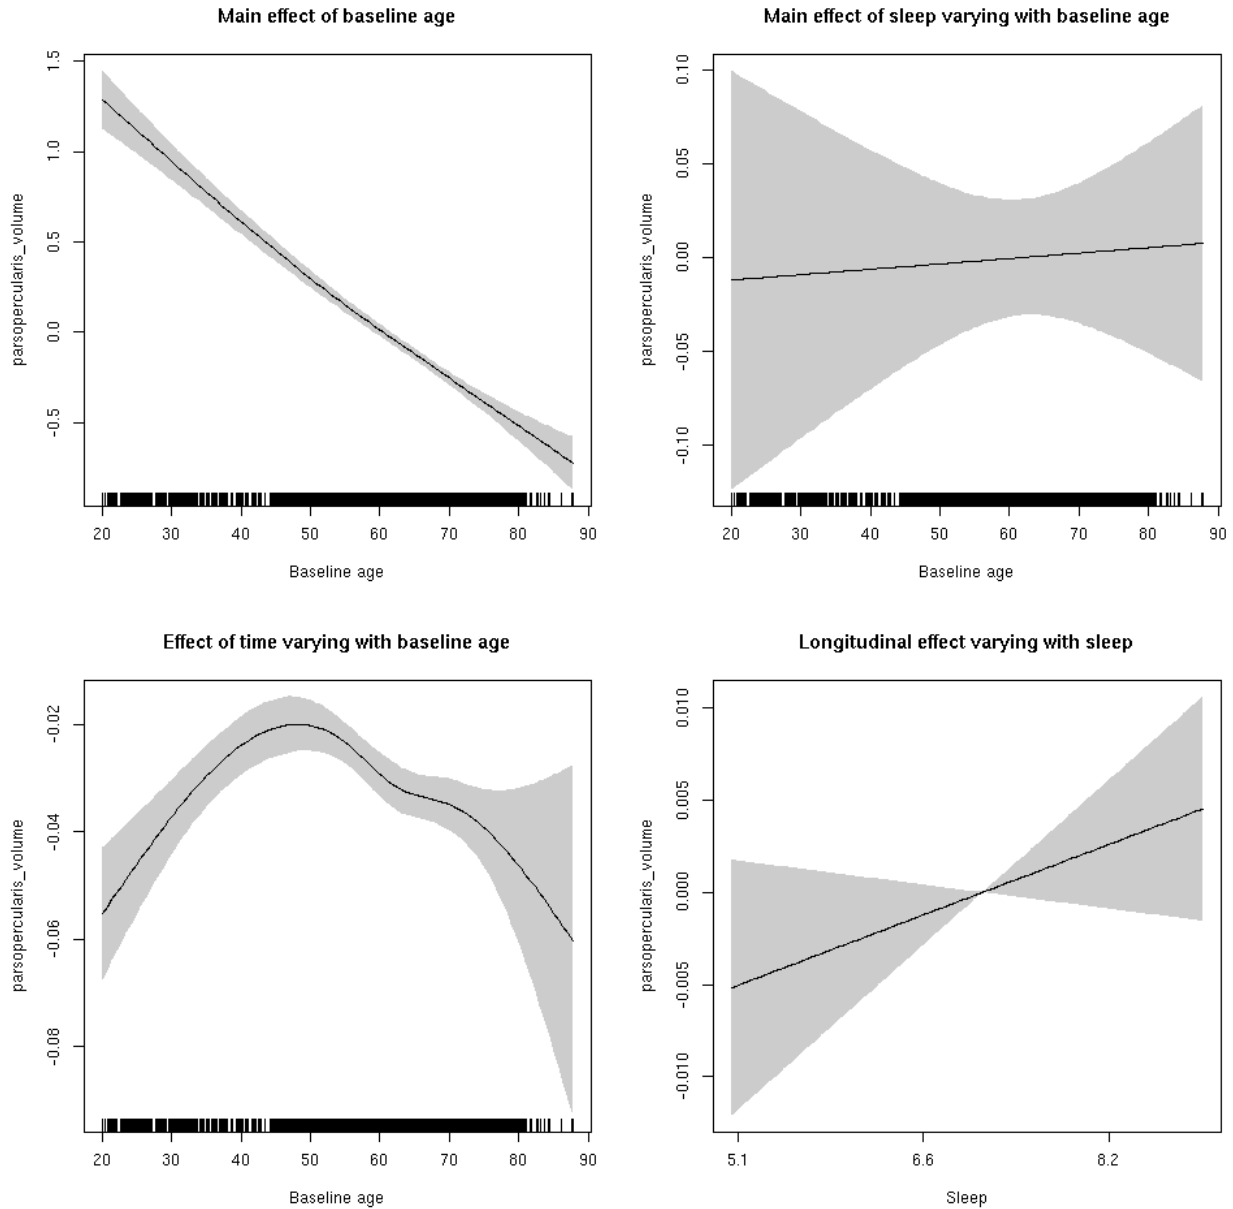

**Restricted to sleep  $\geq 5$  and  $\leq 9$  hours** Below is the row for `s(sleep_z):time` from the model output.

```
## s(sleep_z):time 1.000 1.000 2.221 0.136
```

Below are plots of a plot of `s(bl_age)`, `s(bl_age):sleep_z`, `s(bl_age):time`, and `s(sleep_z):time`. For `s(sleep_z):time`, roughly, if we cannot fit a straight line through the confidence bands, there is evidence that the effect of time depends on sleep duration. It is correct that the confidence interval is zero at one point along the axis; this happens because we do not include the main effect.

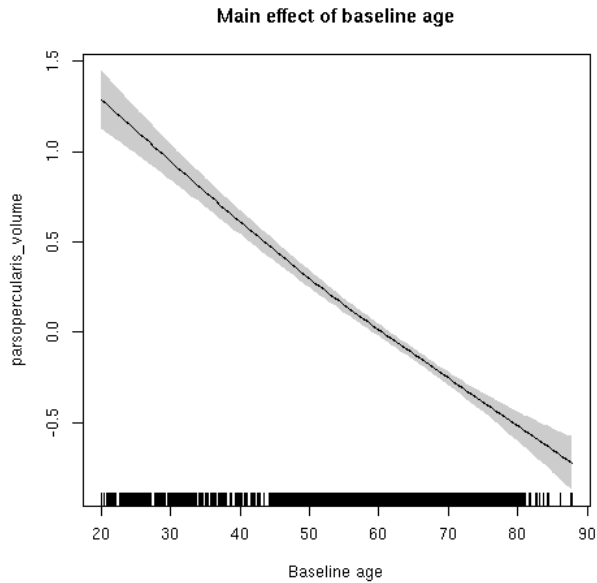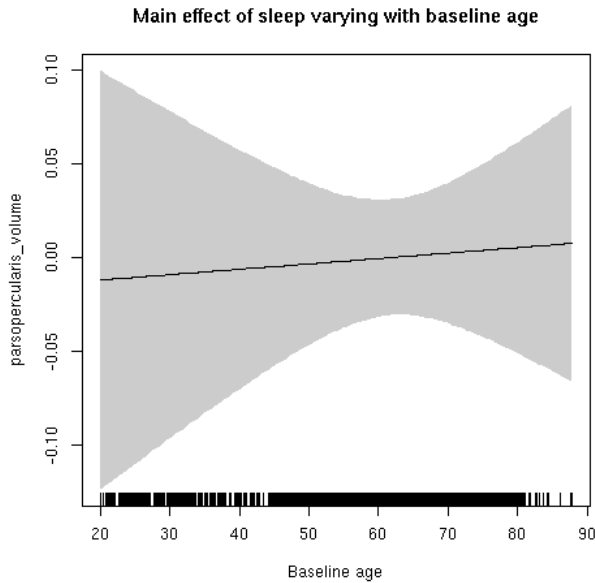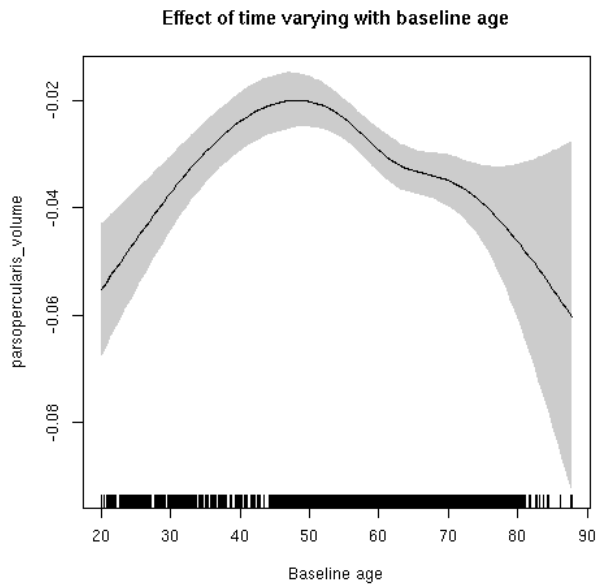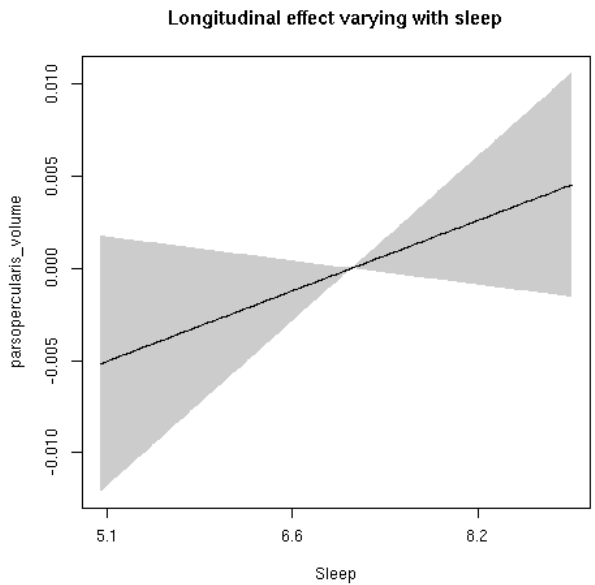

**parsorbitalis\_area: Stratified by sex**

**Female: Full data** Below is the row for `s(sleep_z):time` from the model output.

```
## s(sleep_z):time  1.000  1.000  0.560  0.4542
```

Below are plots of a plot of `s(bl_age)`, `s(bl_age):sleep_z`, `s(bl_age):time`, and `s(sleep_z):time`. For `s(sleep_z):time`, roughly, if we cannot fit a straight line through the confidence bands, there is evidence that the effect of time depends on sleep duration. It is correct that the confidence interval is zero at one point along the axis; this happens because we do not include the main effect.

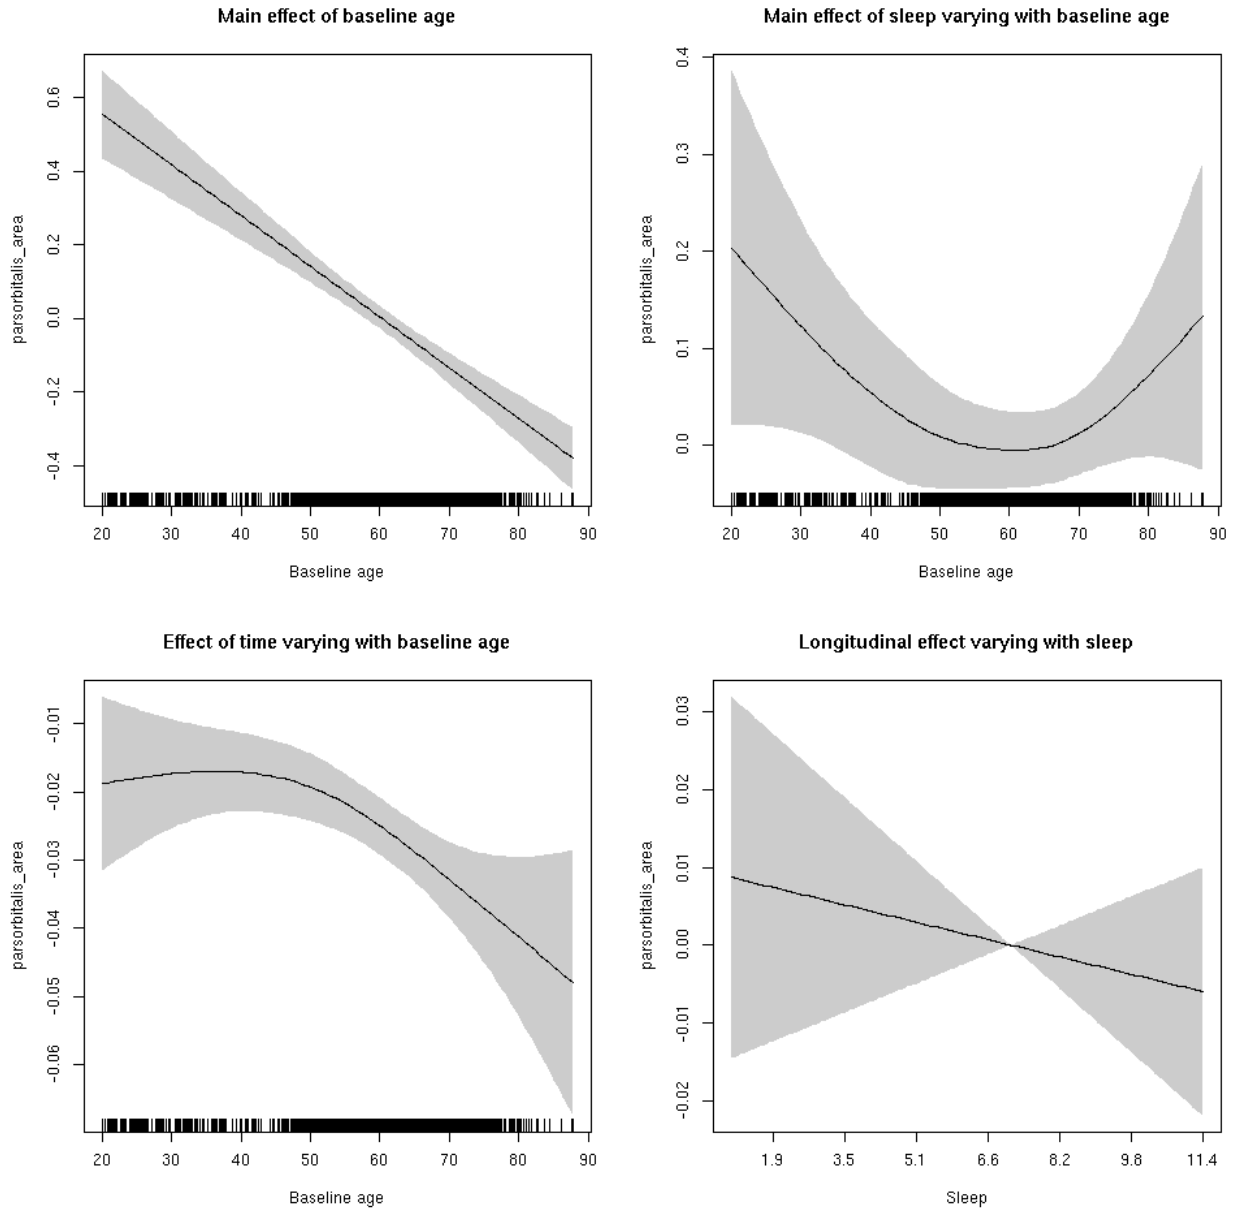

**Male: Full data** Below is the row for `s(sleep_z):time` from the model output.

```
## s(sleep_z):time  1.000  1.000  2.444  0.118
```

Below are plots of a plot of `s(bl_age)`, `s(bl_age):sleep_z`, `s(bl_age):time`, and `s(sleep_z):time`. For `s(sleep_z):time`, roughly, if we cannot fit a straight line through the confidence bands, there is evidence that the effect of time depends on sleep duration. It is correct that the confidence interval is zero at one point along the axis; this happens because we do not include the main effect.

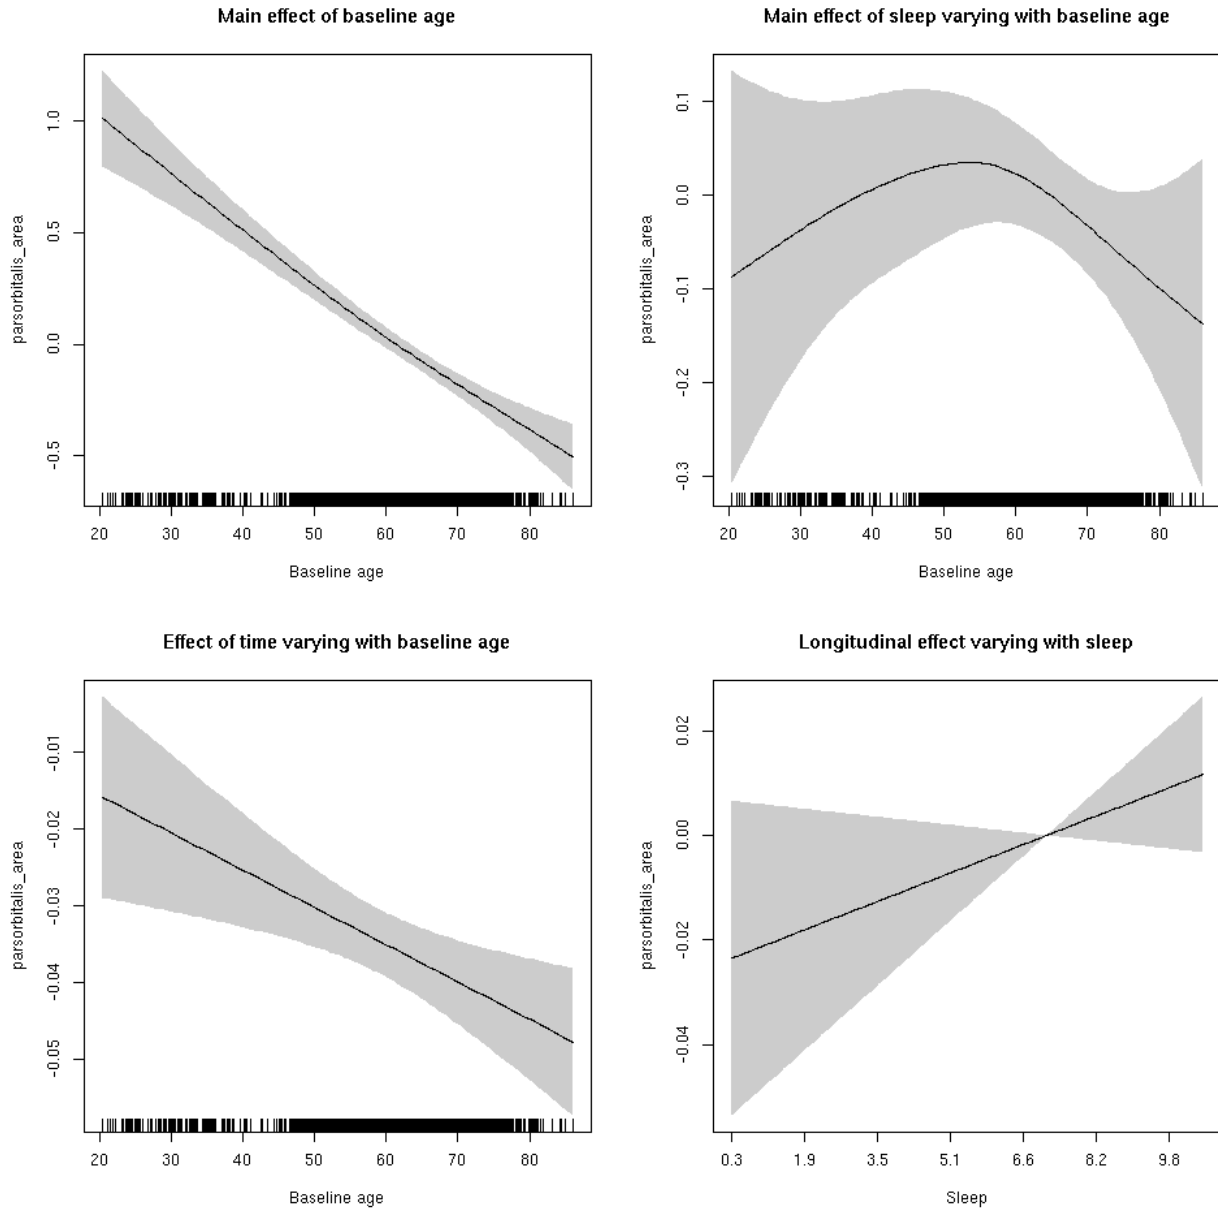

## parsorbitalis\_area

**Full data** Below is the model output. The term `s(sleep_z):time` is probably what we care most about.

```
##
## Family: gaussian
## Link function: identity
##
## Formula:
## value ~ sex + site + icv + s(bl_age, k = 10, bs = "cr") + s(bl_age,
##   by = sleep_z, bs = "cr") + +s(bl_age, by = time, k = 5, bs = "cr") +
##   s(sleep_z, by = time, k = 5, bs = "cr", pc = 0)
## <environment: 0x5630035b4648>
```

```

##
## Parametric coefficients:
##           Estimate Std. Error t value Pr(>|t|)
## (Intercept)  0.78934    0.05713  13.816 < 2e-16 ***
## sexmale      0.41611    0.02969  14.017 < 2e-16 ***
## siteousAvanto -0.75204    0.07044 -10.677 < 2e-16 ***
## siteousPrisma -0.91877    0.15092  -6.088 1.20e-09 ***
## siteousSkyra  -0.19730    0.06817  -2.894 0.00381 **
## siteUB       -0.82621    0.13308  -6.208 5.62e-10 ***
## siteUCAM     -0.77470    0.07116 -10.887 < 2e-16 ***
## siteUKB     -0.96524    0.05324 -18.129 < 2e-16 ***
## siteUmU     -0.02261    0.08209  -0.275 0.78303
## icv         0.47658    0.01456  32.737 < 2e-16 ***
## ---
## Signif. codes:  0 '***' 0.001 '**' 0.01 '*' 0.05 '.' 0.1 ' ' 1
##
## Approximate significance of smooth terms:
##           edf Ref.df      F p-value
## s(bl_age)      1.000  1.000 259.457 <2e-16 ***
## s(bl_age):sleep_z 2.000  2.000  0.724  0.485
## s(bl_age):time  2.831  2.831 165.820 <2e-16 ***
## s(sleep_z):time  1.000  1.000  0.330  0.566
## ---
## Signif. codes:  0 '***' 0.001 '**' 0.01 '*' 0.05 '.' 0.1 ' ' 1
##
## R-sq.(adj) =  0.458
## lmer.REML = 8887.6 Scale est. = 0.029685 n = 8173

```

Below are plots of a plot of  $s(\text{bl\_age})$ ,  $s(\text{bl\_age}):\text{sleep\_z}$ ,  $s(\text{bl\_age}):\text{time}$ , and  $s(\text{sleep\_z}):\text{time}$ . For  $s(\text{sleep\_z}):\text{time}$ , roughly, if we cannot fit a straight line through the confidence bands, there is evidence that the effect of time depends on sleep duration. It is correct that the confidence interval is zero at one point along the axis; this happens because we do not include the main effect.

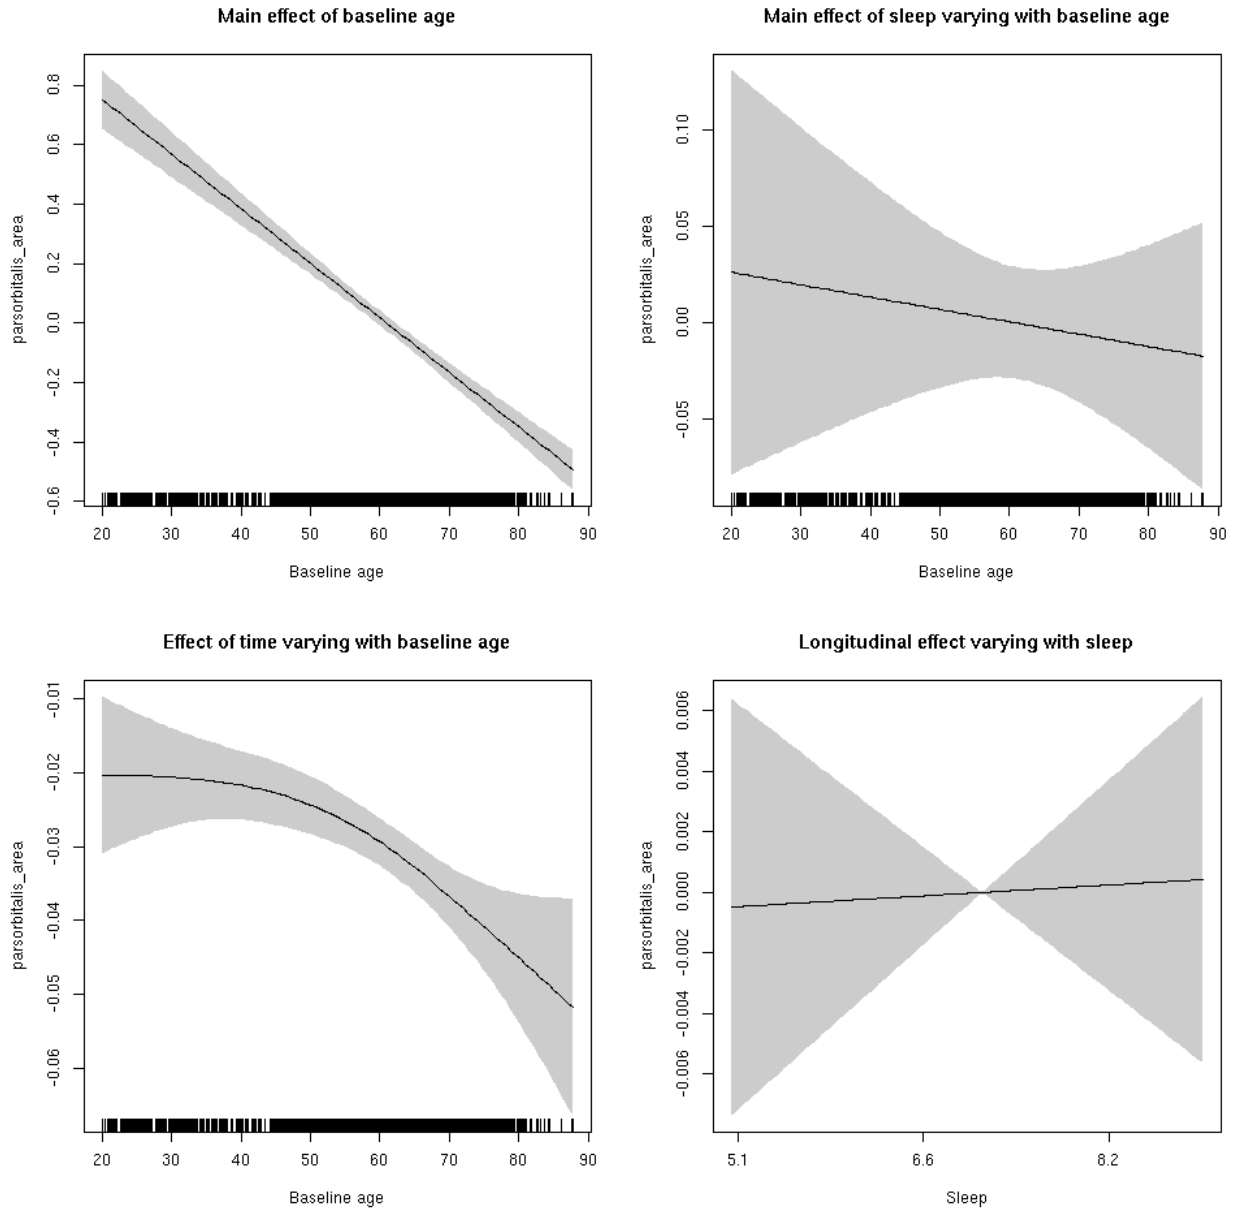

**Restricted to sleep  $\geq 5$  and  $\leq 9$  hours** Below is the row for `s(sleep_z):time` from the model output.

```
## s(sleep_z):time 1.000 1.000 0.020 0.888
```

Below are plots of a plot of `s(bl_age)`, `s(bl_age):sleep_z`, `s(bl_age):time`, and `s(sleep_z):time`. For `s(sleep_z):time`, roughly, if we cannot fit a straight line through the confidence bands, there is evidence that the effect of time depends on sleep duration. It is correct that the confidence interval is zero at one point along the axis; this happens because we do not include the main effect.



### `parsorbitalis_thickness`: Stratified by sex

**Female: Full data** Below is the row for `s(sleep_z):time` from the model output.

```
## s(sleep_z):time  3.178  3.178  2.255  0.0410 *
```

Below are plots of a plot of `s(bl_age)`, `s(bl_age):sleep_z`, `s(bl_age):time`, and `s(sleep_z):time`. For `s(sleep_z):time`, roughly, if we cannot fit a straight line through the confidence bands, there is evidence that the effect of time depends on sleep duration. It is correct that the confidence interval is zero at one point along the axis; this happens because we do not include the main effect.

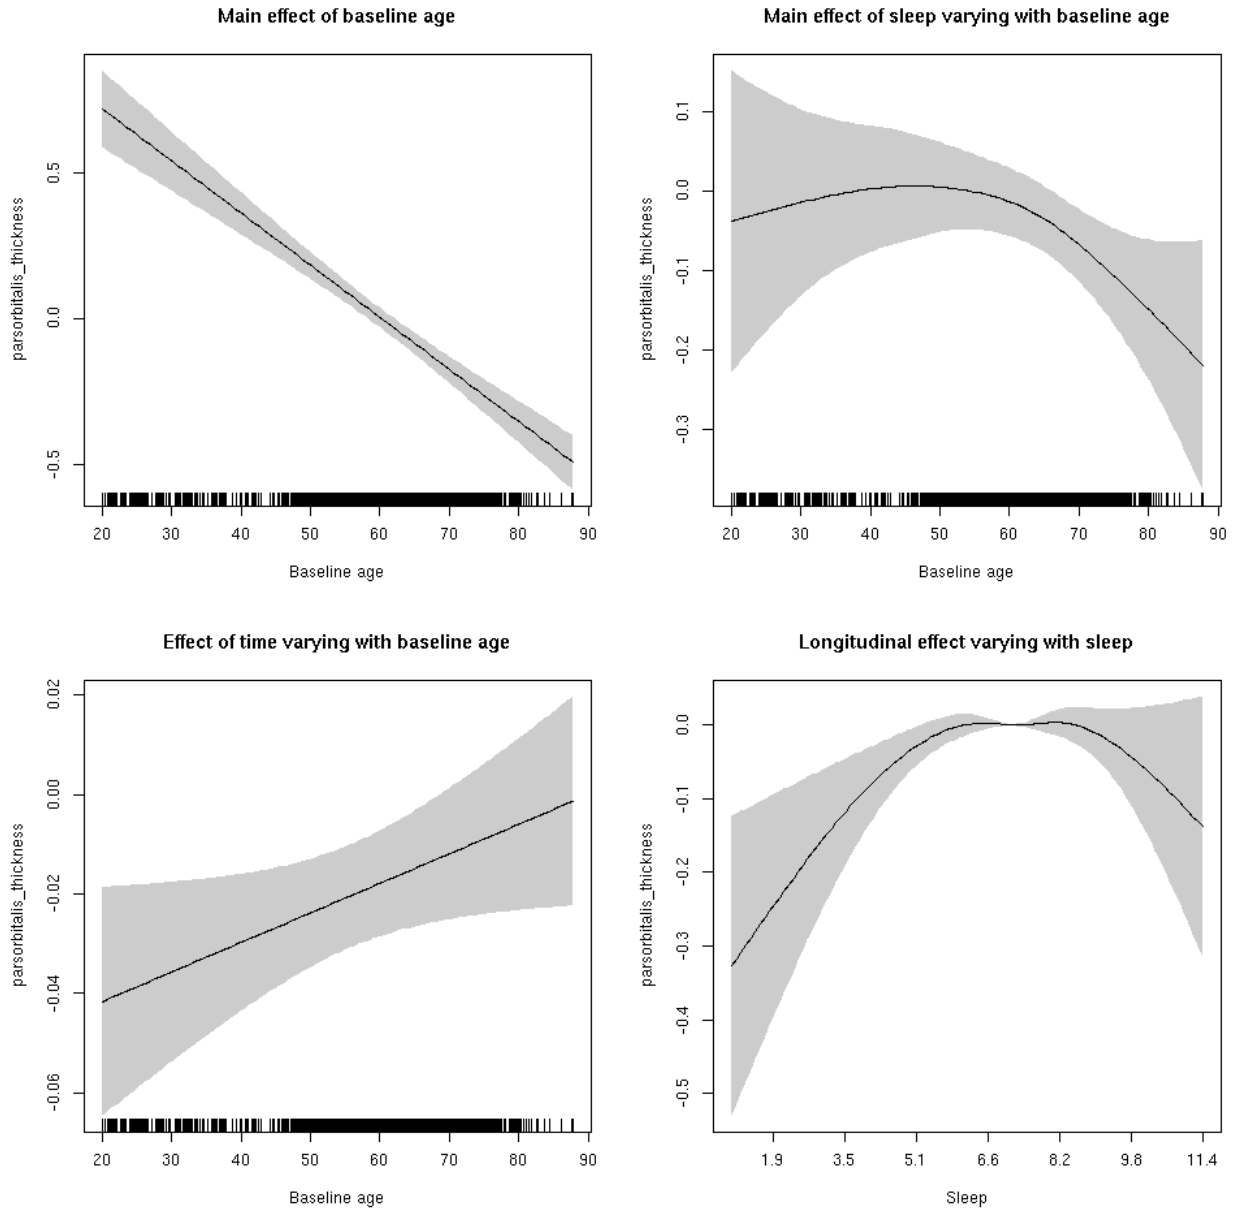

**Male: Full data** Below is the row for `s(sleep_z):time` from the model output.

```
## s(sleep_z):time 1.000 1.000 0.006 0.937602
```

Below are plots of a plot of `s(bl_age)`, `s(bl_age):sleep_z`, `s(bl_age):time`, and `s(sleep_z):time`. For `s(sleep_z):time`, roughly, if we cannot fit a straight line through the confidence bands, there is evidence that the effect of time depends on sleep duration. It is correct that the confidence interval is zero at one point along the axis; this happens because we do not include the main effect.



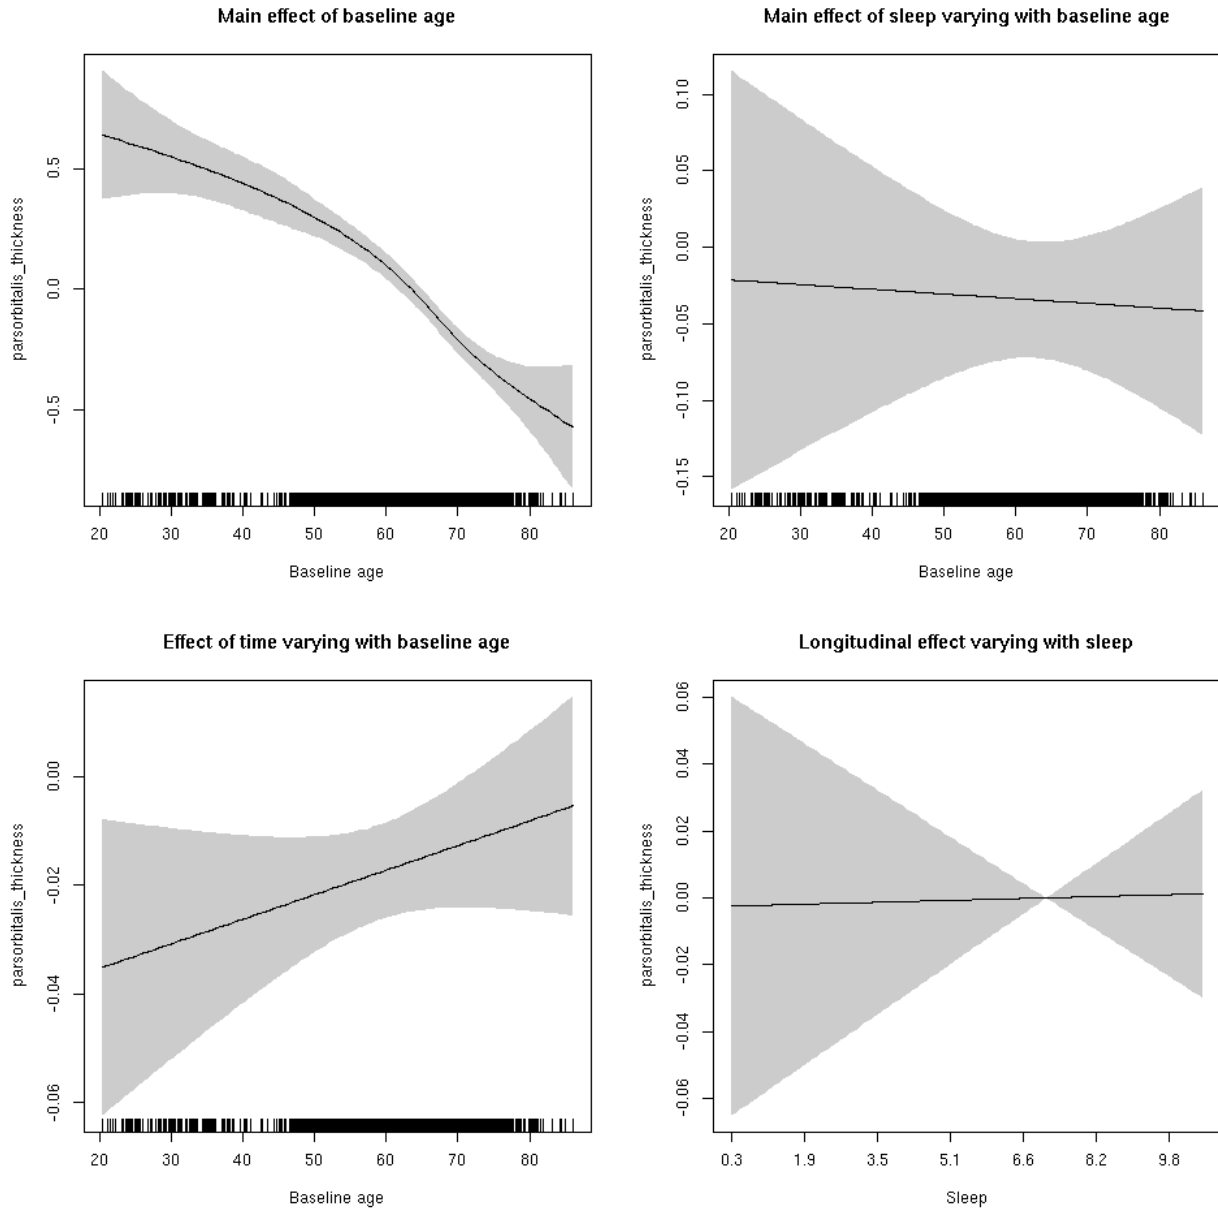

## parsorbitalis\_thickness

**Full data** Below is the model output. The term `s(sleep_z):time` is probably what we care most about.

```
##
## Family: gaussian
## Link function: identity
##
## Formula:
## value ~ sex + site + s(bl_age, k = 10, bs = "cr") + s(bl_age,
##   by = sleep_z, bs = "cr") + +s(bl_age, by = time, k = 5, bs = "cr") +
##   s(sleep_z, by = time, k = 5, bs = "cr", pc = 0)
## <environment: 0x5630035c7a08>
```

```

##
## Parametric coefficients:
##           Estimate Std. Error t value Pr(>|t|)
## (Intercept) -1.632236  0.048219 -33.851 < 2e-16 ***
## sexmale     -0.133169  0.024169  -5.510 3.70e-08 ***
## siteousAvanto 0.460040  0.064278   7.157 8.96e-13 ***
## siteousPrisma 0.212853  0.288786   0.737  0.461
## siteousSkyra 0.001281  0.064256   0.020  0.984
## siteUB      0.754028  0.127591   5.910 3.56e-09 ***
## siteUCAM    0.620259  0.066341   9.350 < 2e-16 ***
## siteUKB     1.958571  0.048855  40.090 < 2e-16 ***
## siteUmU    -0.333430  0.079694  -4.184 2.90e-05 ***
## ---
## Signif. codes:  0 '***' 0.001 '**' 0.01 '*' 0.05 '.' 0.1 ' ' 1
##
## Approximate significance of smooth terms:
##           edf Ref.df      F p-value
## s(bl_age)      3.694  3.694 83.607 < 2e-16 ***
## s(bl_age):sleep_z 2.874  2.874  4.181  0.0047 **
## s(bl_age):time  2.000  2.000 15.185 6.57e-07 ***
## s(sleep_z):time 2.865  2.865  1.777  0.1240
## ---
## Signif. codes:  0 '***' 0.001 '**' 0.01 '*' 0.05 '.' 0.1 ' ' 1
##
## R-sq.(adj) =  0.522
## lmer.REML = 15505  Scale est. = 0.14556  n = 8168

```

Below are plots of a plot of `s(bl_age)`, `s(bl_age):sleep_z`, `s(bl_age):time`, and `s(sleep_z):time`. For `s(sleep_z):time`, roughly, if we cannot fit a straight line through the confidence bands, there is evidence that the effect of time depends on sleep duration. It is correct that the confidence interval is zero at one point along the axis; this happens because we do not include the main effect.

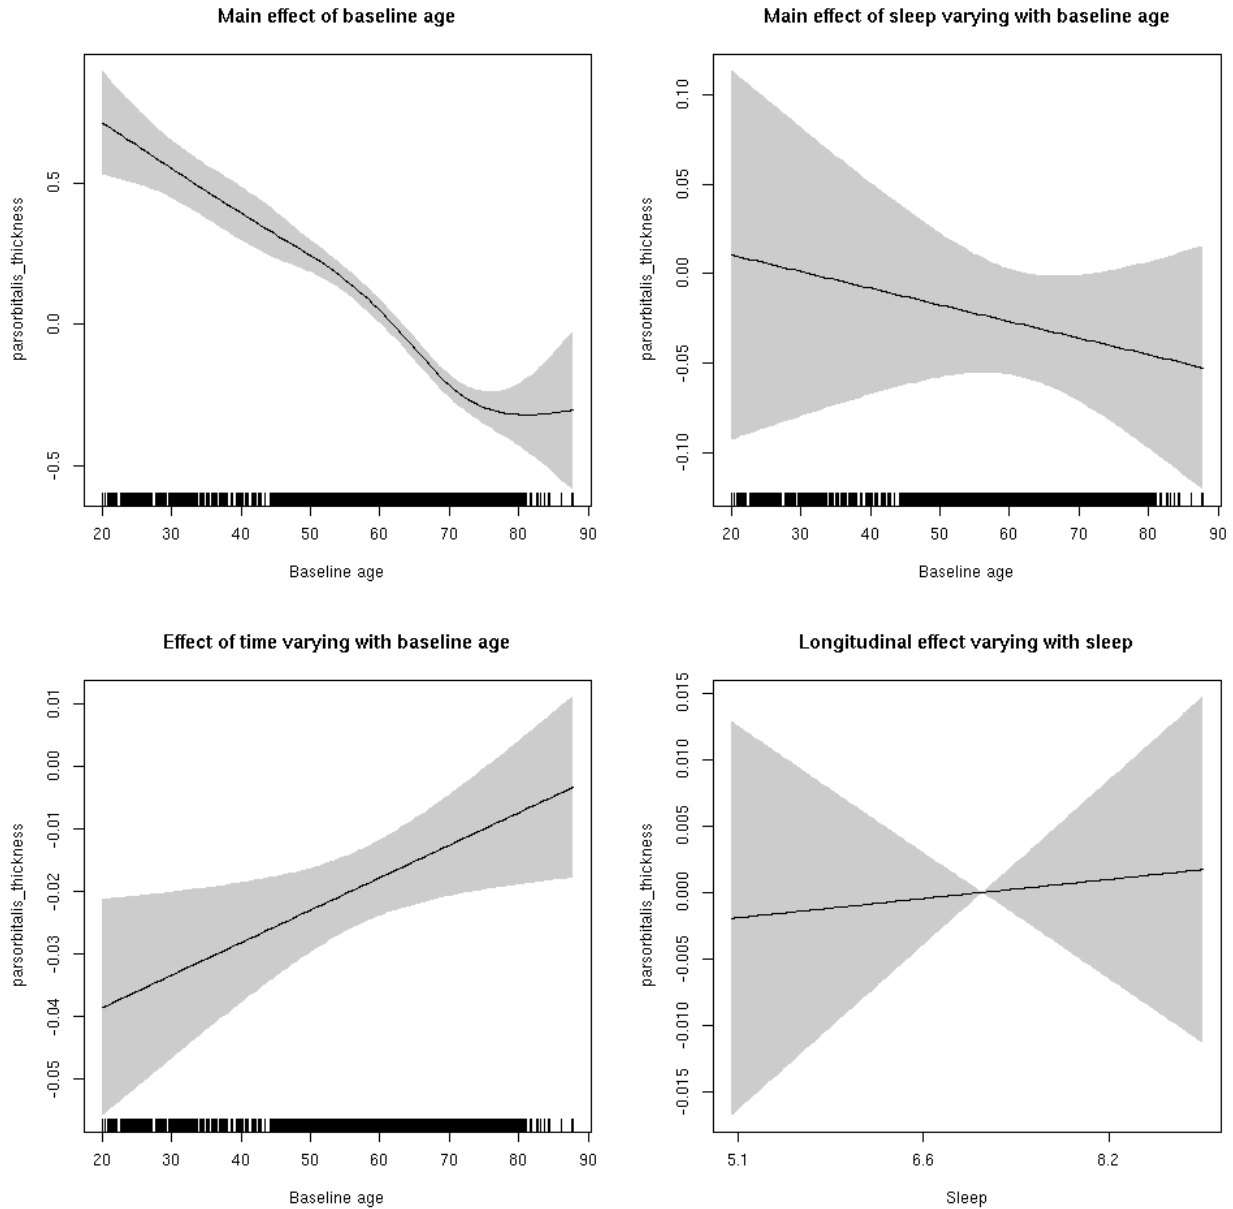

**Restricted to sleep  $\geq 5$  and  $\leq 9$  hours** Below is the row for `s(sleep_z):time` from the model output.

```
## s(sleep_z):time  1.000  1.000  0.069  0.793
```

Below are plots of a plot of `s(bl_age)`, `s(bl_age):sleep_z`, `s(bl_age):time`, and `s(sleep_z):time`. For `s(sleep_z):time`, roughly, if we cannot fit a straight line through the confidence bands, there is evidence that the effect of time depends on sleep duration. It is correct that the confidence interval is zero at one point along the axis; this happens because we do not include the main effect.

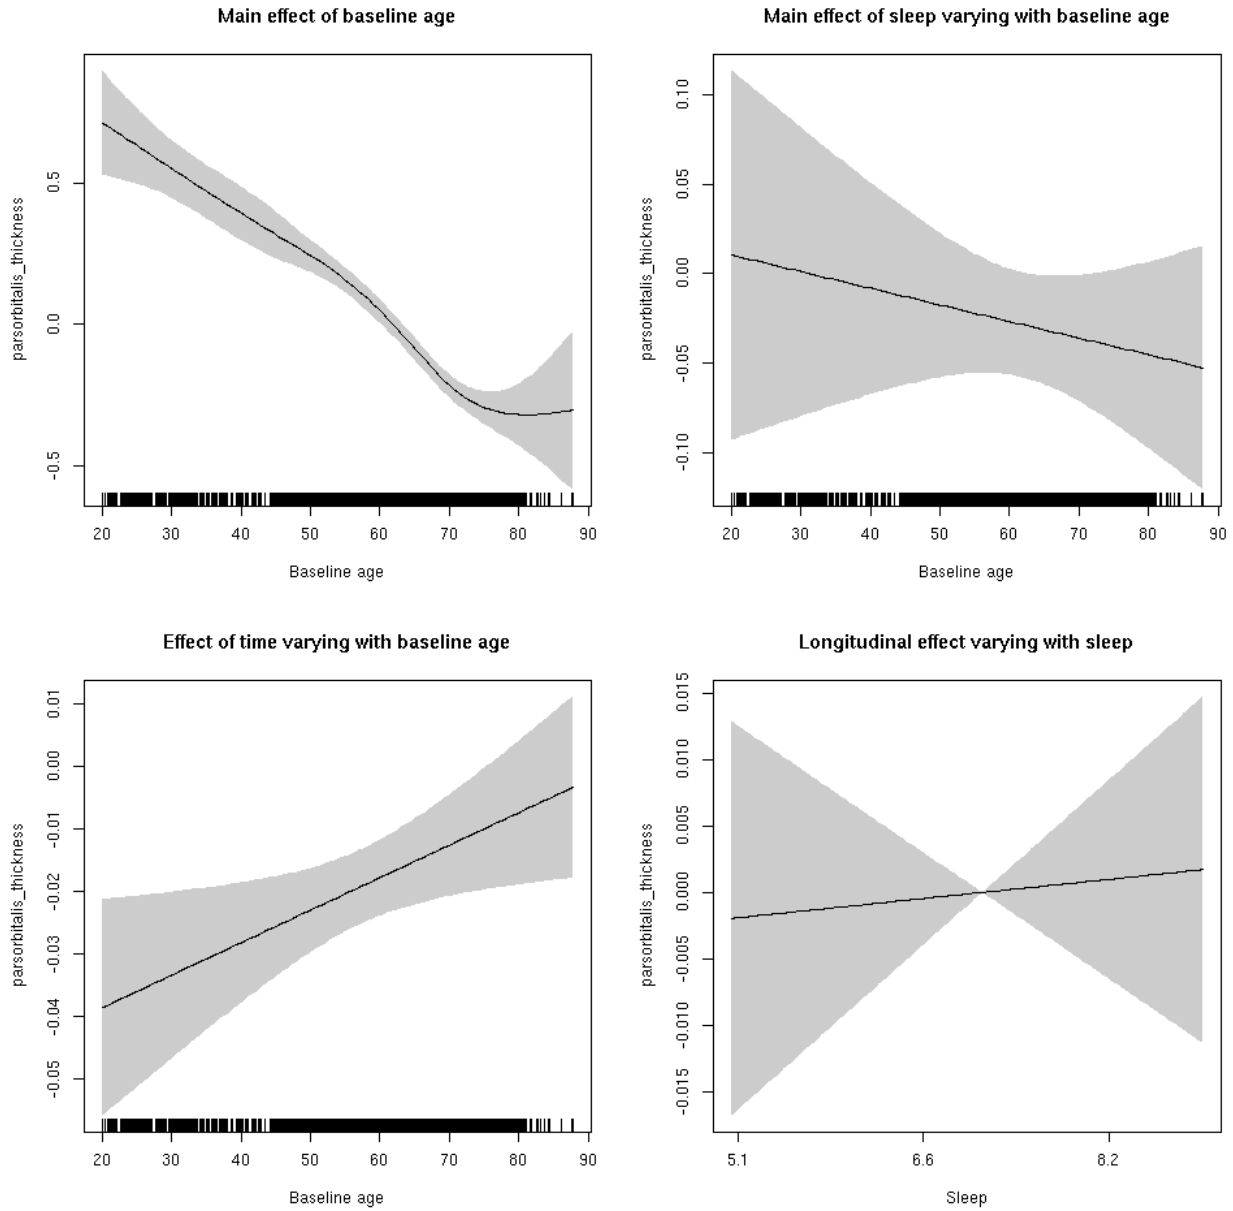

## `parsorbitalis_volume`: Stratified by sex

**Female: Full data** Below is the row for `s(sleep_z):time` from the model output.

```
## s(sleep_z):time  1.000  1.000  0.062  0.8029
```

Below are plots of a plot of `s(bl_age)`, `s(bl_age):sleep_z`, `s(bl_age):time`, and `s(sleep_z):time`. For `s(sleep_z):time`, roughly, if we cannot fit a straight line through the confidence bands, there is evidence that the effect of time depends on sleep duration. It is correct that the confidence interval is zero at one point along the axis; this happens because we do not include the main effect.

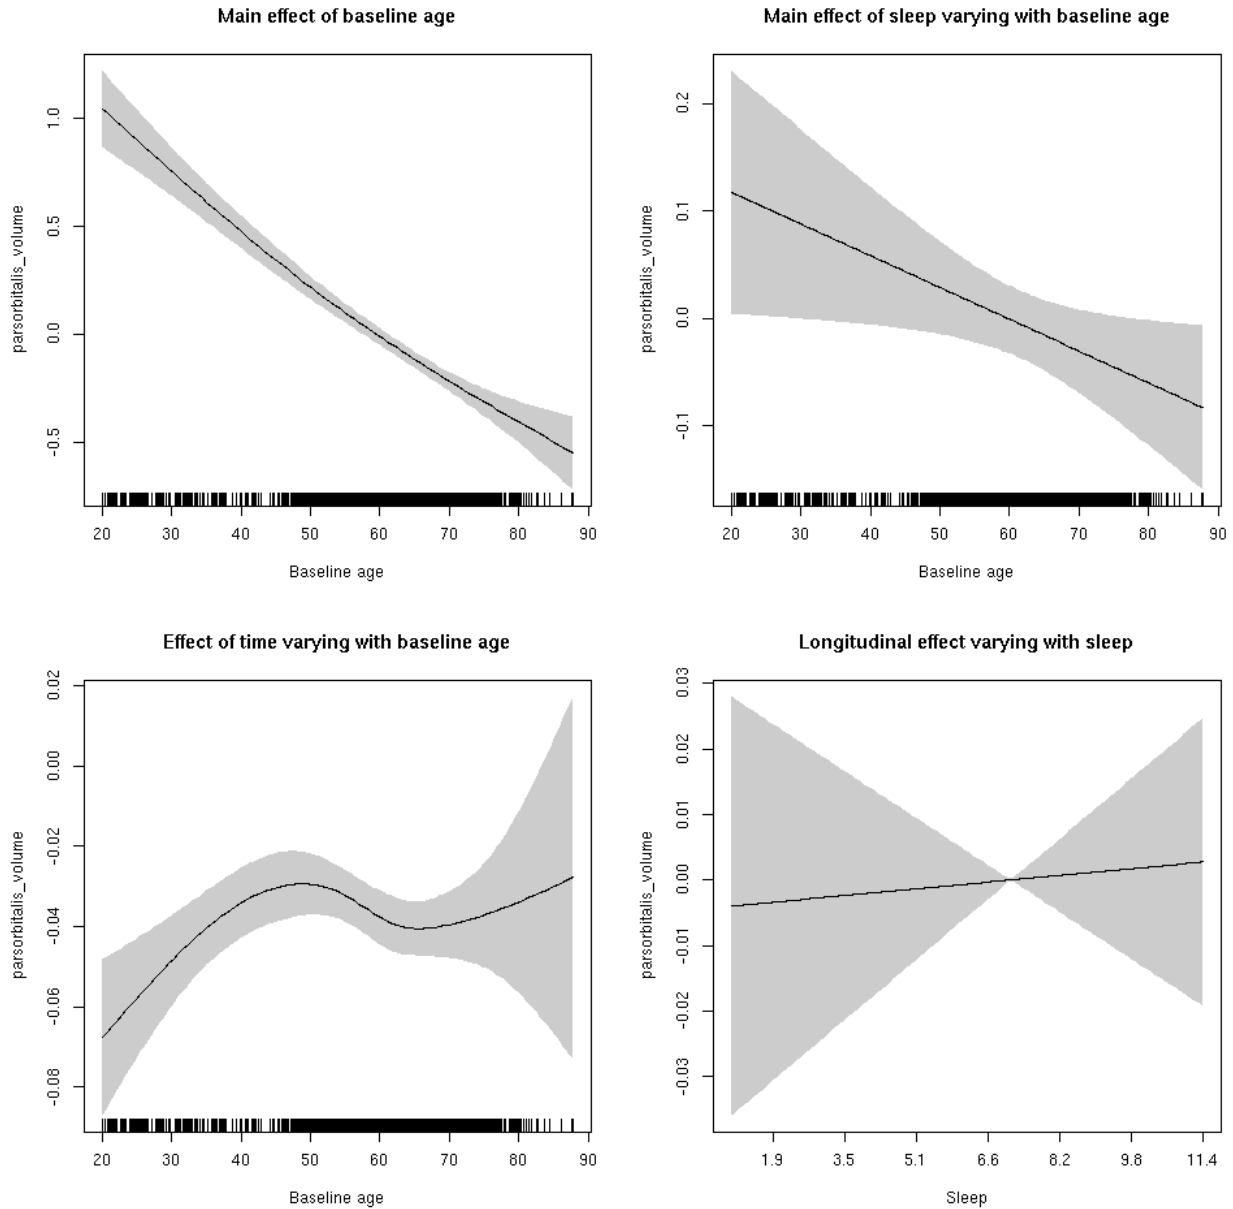

**Male: Full data** Below is the row for `s(sleep_z):time` from the model output.

```
## s(sleep_z):time  1.000  1.000  0.103  0.749
```

Below are plots of a plot of `s(bl_age)`, `s(bl_age):sleep_z`, `s(bl_age):time`, and `s(sleep_z):time`. For `s(sleep_z):time`, roughly, if we cannot fit a straight line through the confidence bands, there is evidence that the effect of time depends on sleep duration. It is correct that the confidence interval is zero at one point along the axis; this happens because we do not include the main effect.

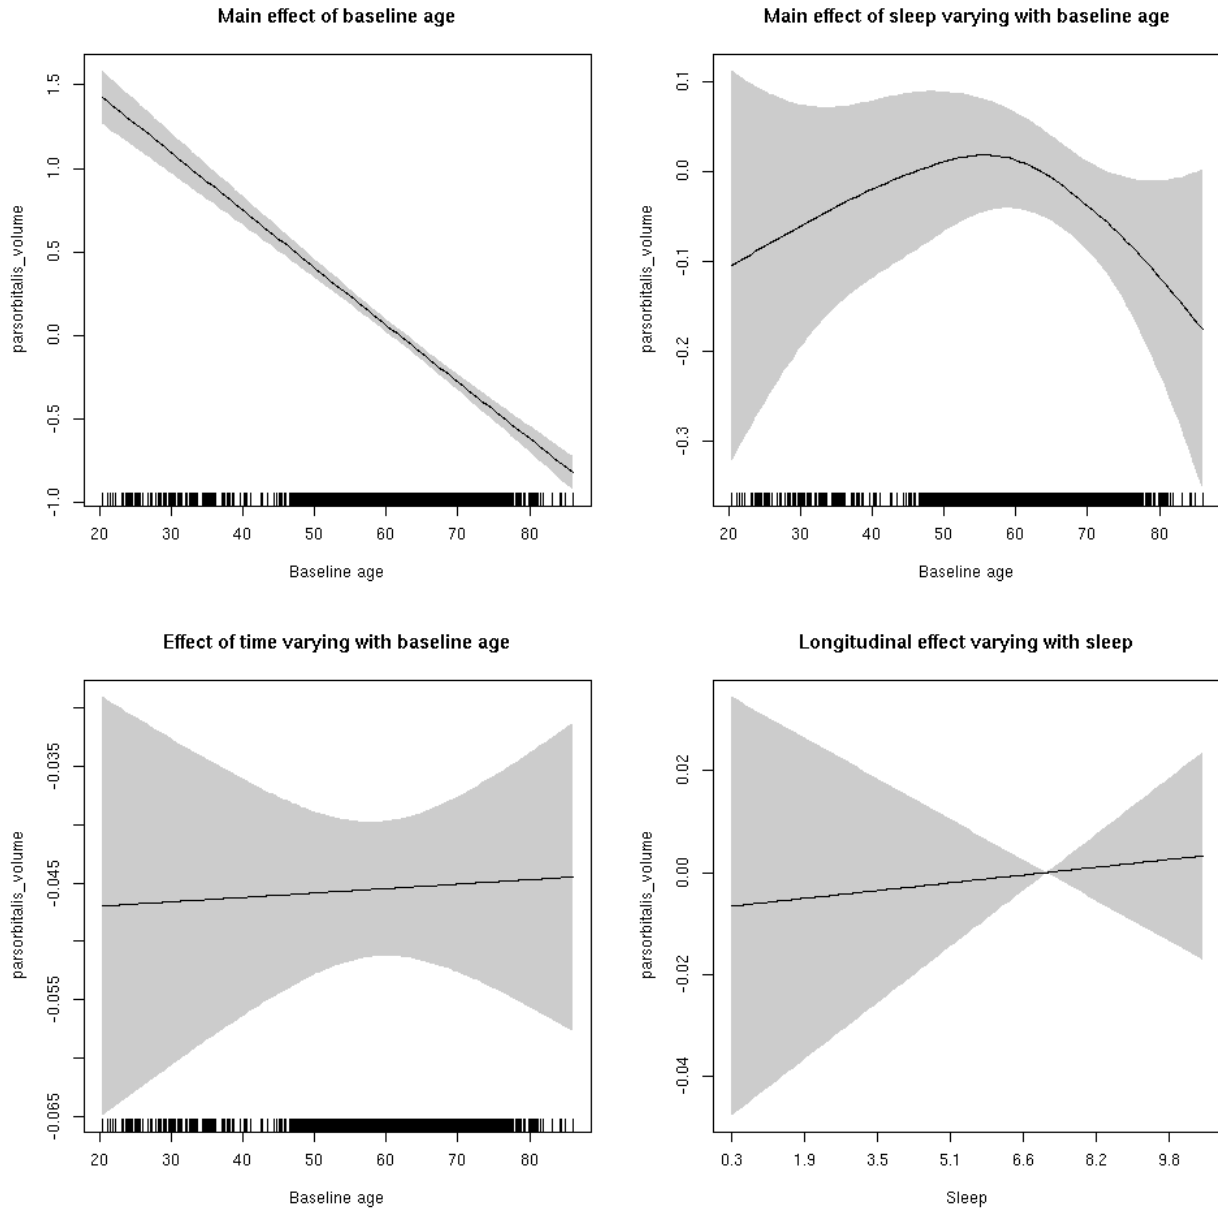

## `parsorbitalis_volume`

**Full data** Below is the model output. The term `s(sleep_z):time` is probably what we care most about.

```
##
## Family: gaussian
## Link function: identity
##
## Formula:
## value ~ sex + site + icv + s(bl_age, k = 10, bs = "cr") + s(bl_age,
##   by = sleep_z, bs = "cr") + +s(bl_age, by = time, k = 5, bs = "cr") +
##   s(sleep_z, by = time, k = 5, bs = "cr", pc = 0)
## <environment: 0x5630035b15e0>
```

```

##
## Parametric coefficients:
##           Estimate Std. Error t value Pr(>|t|)
## (Intercept) -0.22652   0.05697  -3.976 7.07e-05 ***
## sexmale      0.31897   0.02935  10.867 < 2e-16 ***
## siteousAvanto -0.35545   0.06993  -5.083 3.81e-07 ***
## siteousPrisma -0.46387   0.19387  -2.393  0.0167 *
## siteousSkyra  -0.03700   0.06767  -0.547  0.5846
## siteUB       -0.15904   0.13092  -1.215  0.2245
## siteUCAM     -0.15687   0.07044  -2.227  0.0260 *
## siteUKB      0.26216   0.05381   4.872 1.13e-06 ***
## siteUmU     -0.12751   0.08152  -1.564  0.1178
## icv         0.39228   0.01448  27.087 < 2e-16 ***
## ---
## Signif. codes:  0 '***' 0.001 '**' 0.01 '*' 0.05 '.' 0.1 ' ' 1
##
## Approximate significance of smooth terms:
##           edf Ref.df      F p-value
## s(bl_age)      2.148  2.148 296.840 <2e-16 ***
## s(bl_age):sleep_z 2.862  2.862   2.564  0.0347 *
## s(bl_age):time  3.899  3.899 129.166 <2e-16 ***
## s(sleep_z):time  1.000  1.000   0.308  0.5790
## ---
## Signif. codes:  0 '***' 0.001 '**' 0.01 '*' 0.05 '.' 0.1 ' ' 1
##
## R-sq.(adj) =  0.404
## lmer.REML = 11480  Scale est. = 0.05601  n = 8168

```

Below are plots of a plot of `s(bl_age)`, `s(bl_age):sleep_z`, `s(bl_age):time`, and `s(sleep_z):time`. For `s(sleep_z):time`, roughly, if we cannot fit a straight line through the confidence bands, there is evidence that the effect of time depends on sleep duration. It is correct that the confidence interval is zero at one point along the axis; this happens because we do not include the main effect.

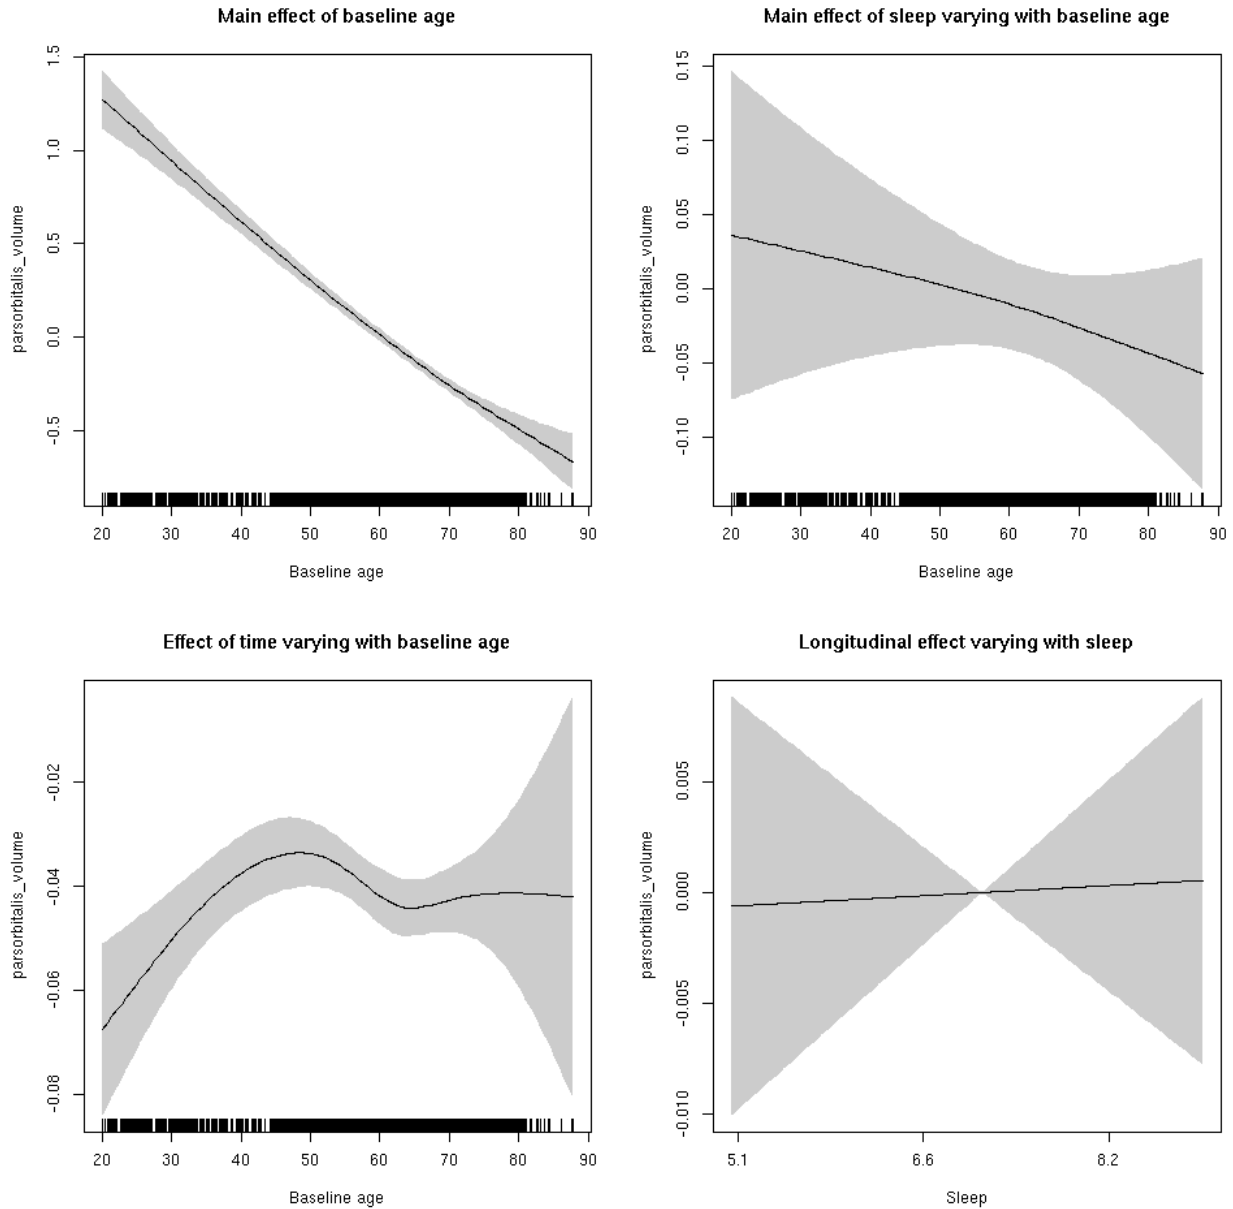

**Restricted to sleep  $\geq 5$  and  $\leq 9$  hours** Below is the row for `s(sleep_z):time` from the model output.

```
## s(sleep_z):time 1.000 1.000 0.017 0.897
```

Below are plots of a plot of `s(bl_age)`, `s(bl_age):sleep_z`, `s(bl_age):time`, and `s(sleep_z):time`. For `s(sleep_z):time`, roughly, if we cannot fit a straight line through the confidence bands, there is evidence that the effect of time depends on sleep duration. It is correct that the confidence interval is zero at one point along the axis; this happens because we do not include the main effect.



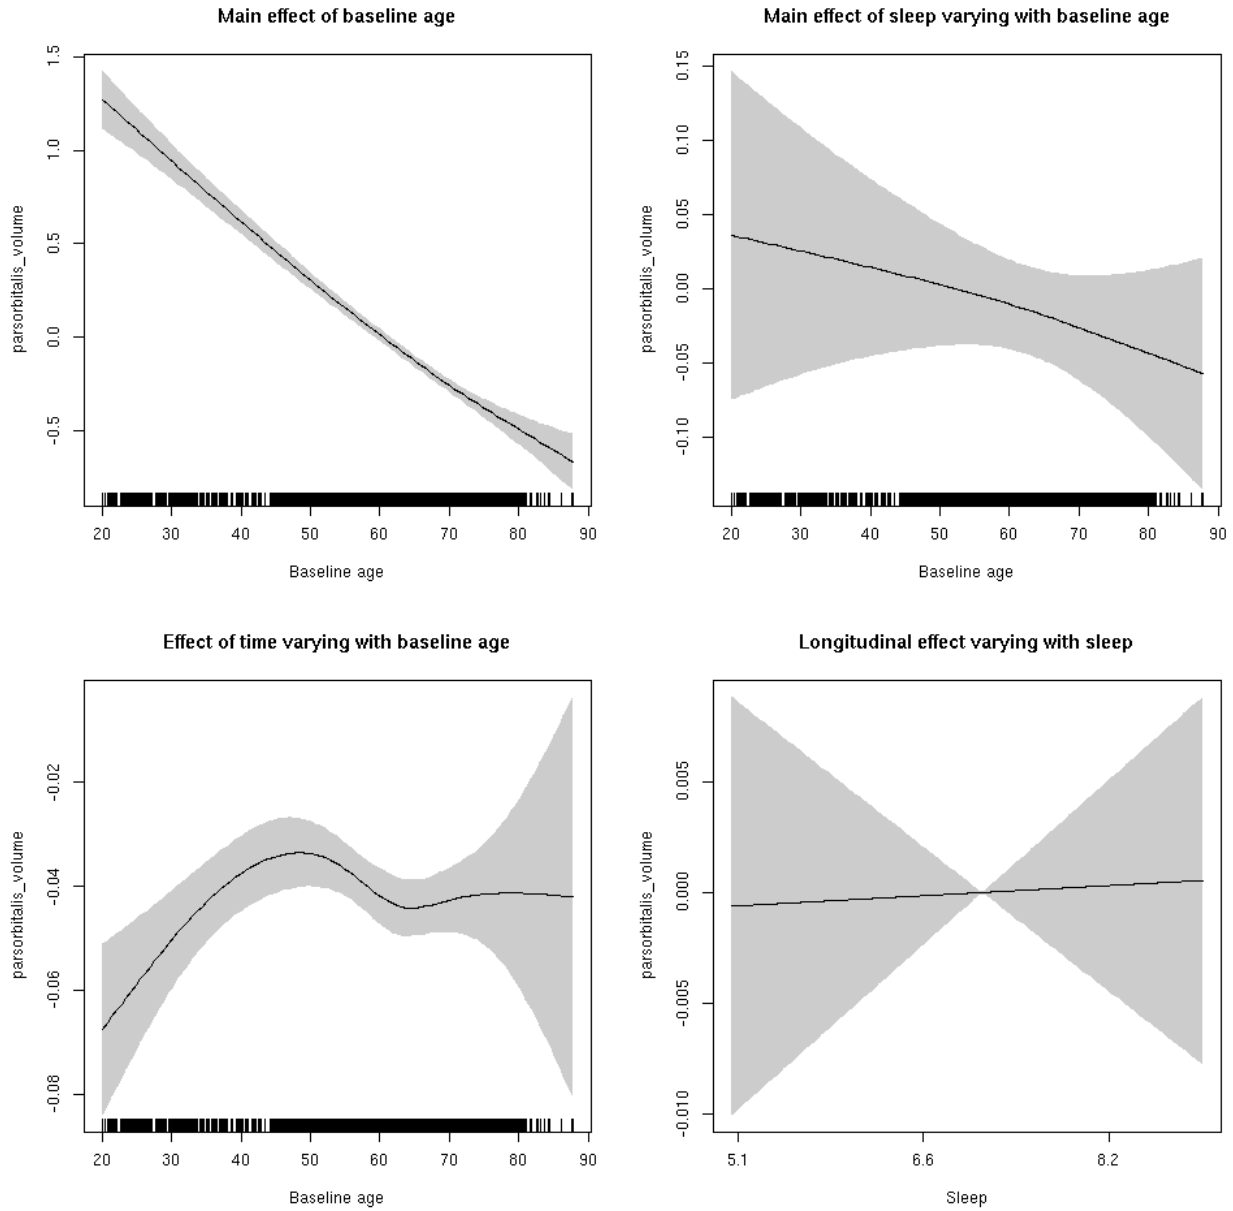

### parstriangularis\_area: Stratified by sex

**Female: Full data** Below is the row for `s(sleep_z):time` from the model output.

```
## s(sleep_z):time  1.000  1.000  0.073  0.787
```

Below are plots of a plot of `s(bl_age)`, `s(bl_age):sleep_z`, `s(bl_age):time`, and `s(sleep_z):time`. For `s(sleep_z):time`, roughly, if we cannot fit a straight line through the confidence bands, there is evidence that the effect of time depends on sleep duration. It is correct that the confidence interval is zero at one point along the axis; this happens because we do not include the main effect.

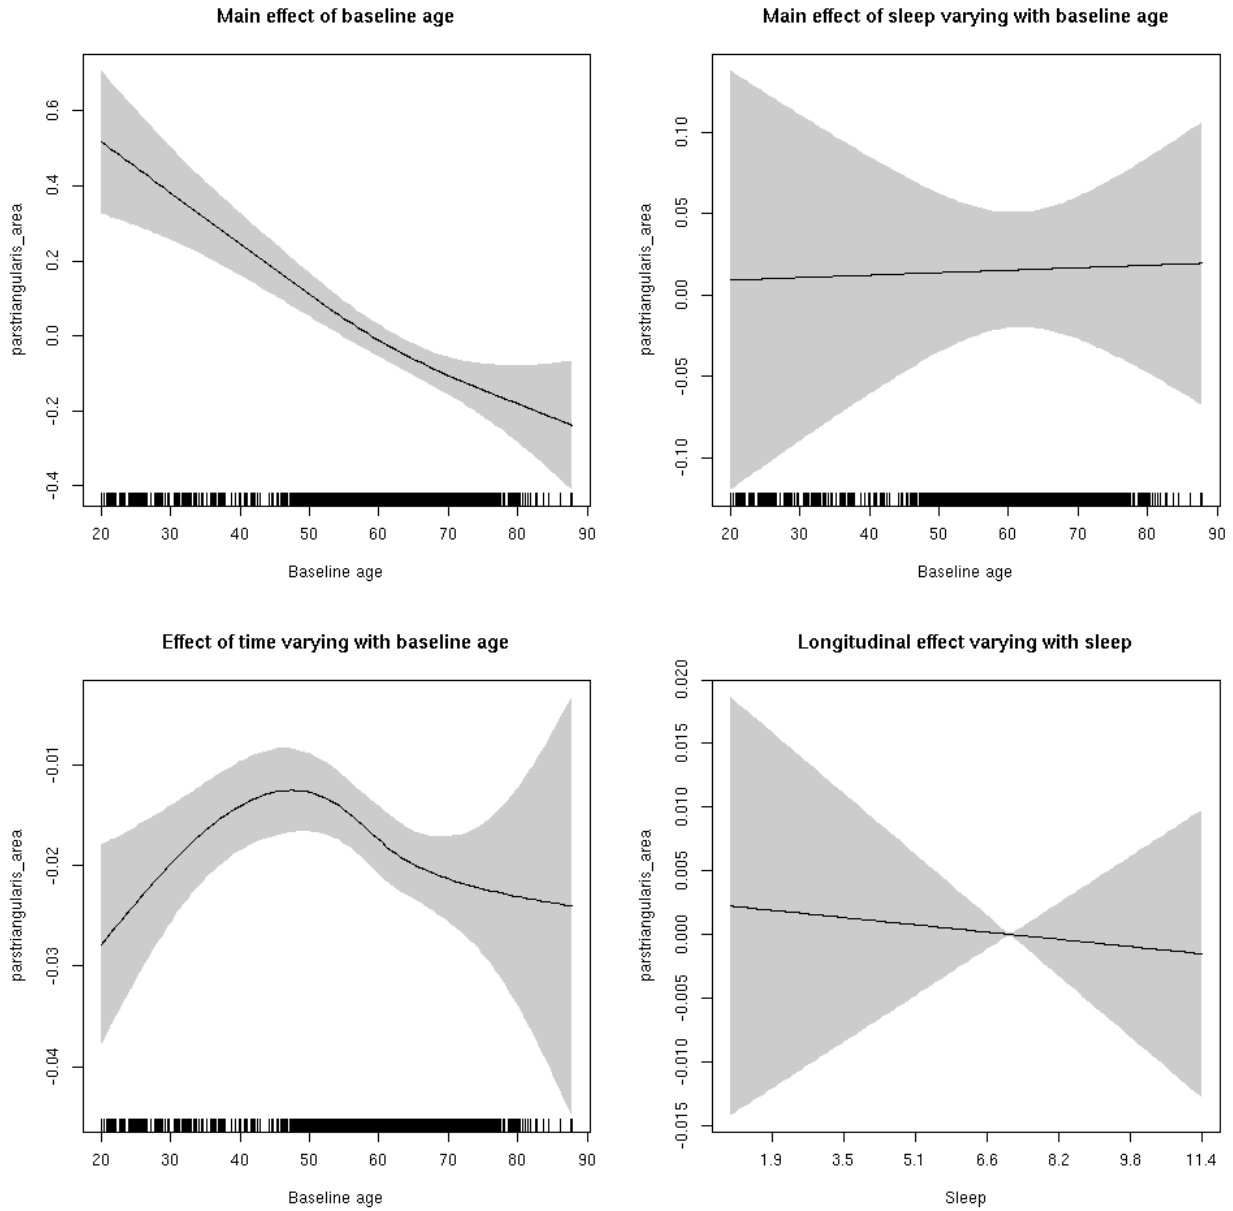

**Male: Full data** Below is the row for `s(sleep_z):time` from the model output.

```
## s(sleep_z):time  1.000  1.000  0.125  0.724
```

Below are plots of a plot of `s(bl_age)`, `s(bl_age):sleep_z`, `s(bl_age):time`, and `s(sleep_z):time`. For `s(sleep_z):time`, roughly, if we cannot fit a straight line through the confidence bands, there is evidence that the effect of time depends on sleep duration. It is correct that the confidence interval is zero at one point along the axis; this happens because we do not include the main effect.

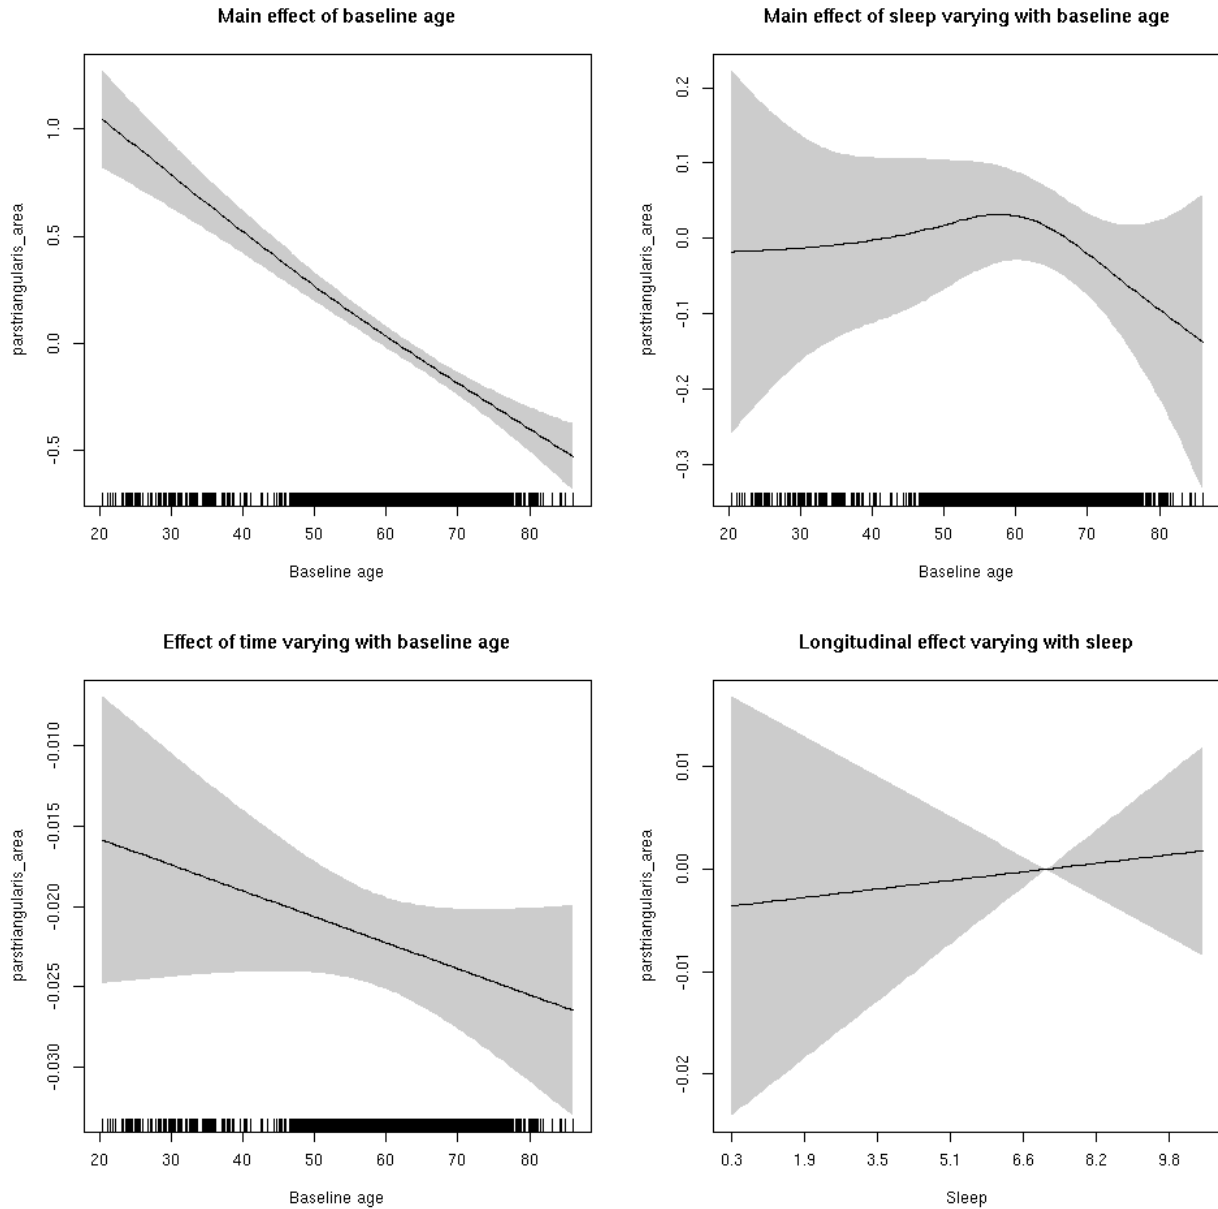

## parstriangularis\_area

**Full data** Below is the model output. The term `s(sleep_z):time` is probably what we care most about.

```
##
## Family: gaussian
## Link function: identity
##
## Formula:
## value ~ sex + site + icv + s(bl_age, k = 10, bs = "cr") + s(bl_age,
##   by = sleep_z, bs = "cr") + +s(bl_age, by = time, k = 5, bs = "cr") +
##   s(sleep_z, by = time, k = 5, bs = "cr", pc = 0)
## <environment: 0x5630035b28b0>
```

```

##
## Parametric coefficients:
##           Estimate Std. Error t value Pr(>|t|)
## (Intercept)  0.71083   0.06326  11.237 < 2e-16 ***
## sexmale      0.31697   0.03267   9.701 < 2e-16 ***
## siteousAvanto -0.72403   0.07740  -9.354 < 2e-16 ***
## siteousPrisma -0.76005   0.12182  -6.239 4.62e-10 ***
## siteousSkyra  -0.34084   0.07509  -4.539 5.73e-06 ***
## siteUB       -0.75211   0.14797  -5.083 3.80e-07 ***
## siteUCAM     -0.73406   0.07879  -9.316 < 2e-16 ***
## siteUKB      -0.84786   0.05975 -14.191 < 2e-16 ***
## siteUmU      -0.30254   0.09123  -3.316 0.000916 ***
## icv          0.41279   0.01572  26.264 < 2e-16 ***
## ---
## Signif. codes:  0 '***' 0.001 '**' 0.01 '*' 0.05 '.' 0.1 ' ' 1
##
## Approximate significance of smooth terms:
##           edf Ref.df      F p-value
## s(bl_age)      1.721  1.721  99.971 <2e-16 ***
## s(bl_age):sleep_z 2.529  2.529   0.166  0.796
## s(bl_age):time  2.674  2.674 160.536 <2e-16 ***
## s(sleep_z):time  1.000  1.000   0.018  0.893
## ---
## Signif. codes:  0 '***' 0.001 '**' 0.01 '*' 0.05 '.' 0.1 ' ' 1
##
## R-sq.(adj) =  0.334
## lmer.REML = 6517.4  Scale est. = 0.014103  n = 8157

```

Below are plots of a plot of `s(bl_age)`, `s(bl_age):sleep_z`, `s(bl_age):time`, and `s(sleep_z):time`. For `s(sleep_z):time`, roughly, if we cannot fit a straight line through the confidence bands, there is evidence that the effect of time depends on sleep duration. It is correct that the confidence interval is zero at one point along the axis; this happens because we do not include the main effect.

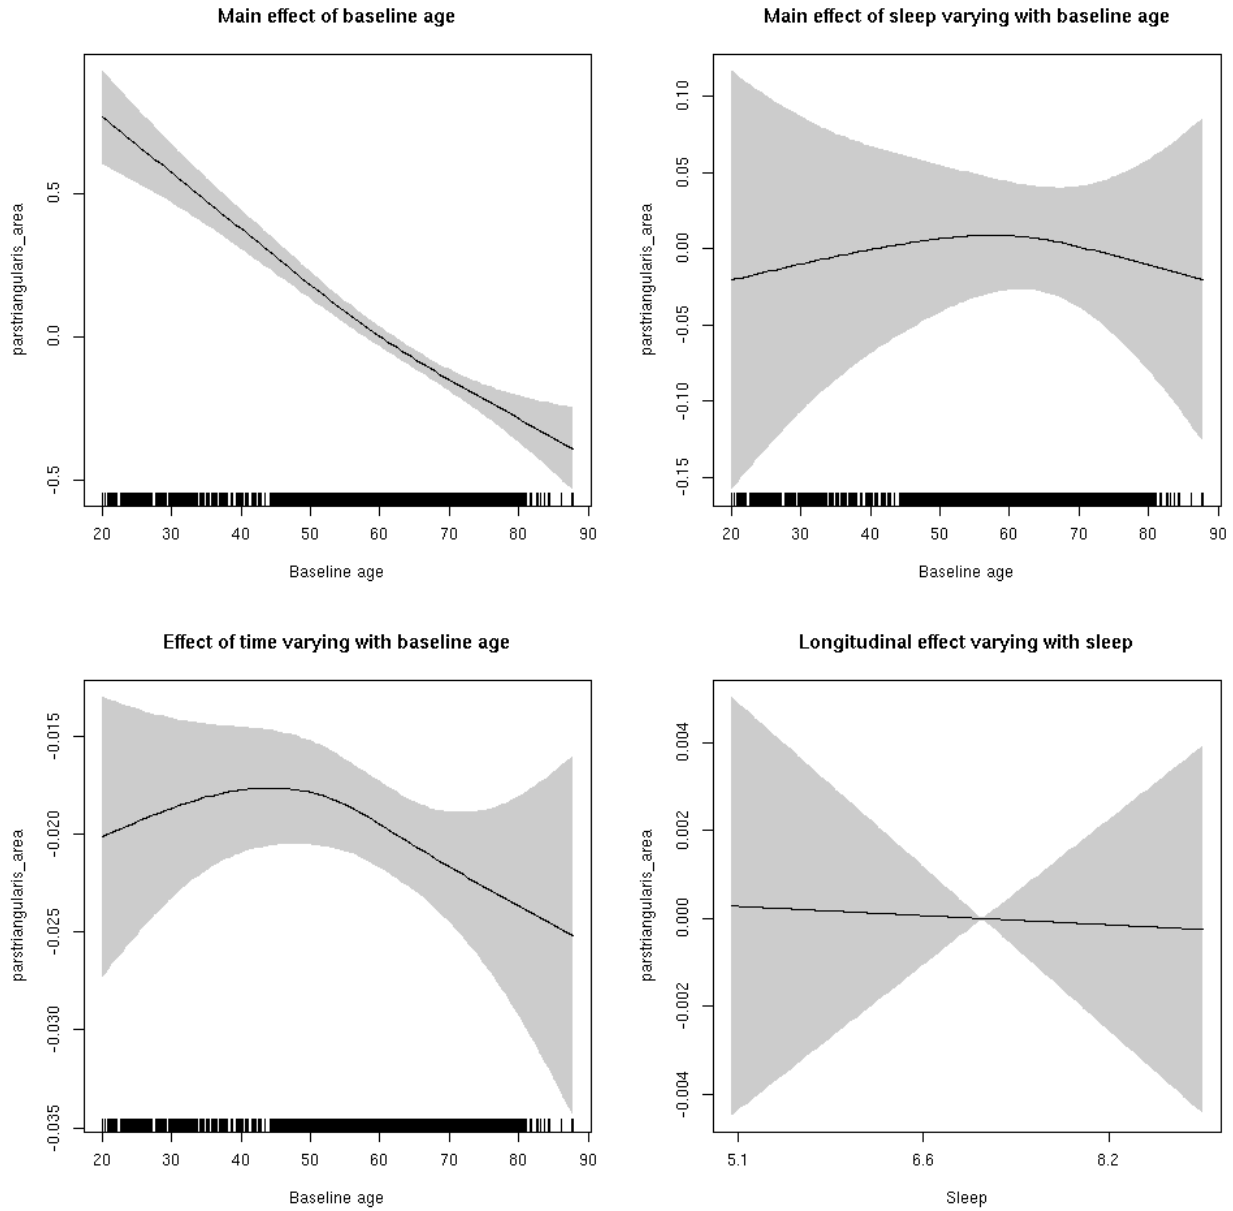

**Restricted to sleep  $\geq 5$  and  $\leq 9$  hours** Below is the row for `s(sleep_z):time` from the model output.

```
## s(sleep_z):time  1.000  1.000  0.014  0.905
```

Below are plots of a plot of `s(bl_age)`, `s(bl_age):sleep_z`, `s(bl_age):time`, and `s(sleep_z):time`. For `s(sleep_z):time`, roughly, if we cannot fit a straight line through the confidence bands, there is evidence that the effect of time depends on sleep duration. It is correct that the confidence interval is zero at one point along the axis; this happens because we do not include the main effect.



### parstriangularis\_thickness: Stratified by sex

**Female: Full data** Below is the row for `s(sleep_z):time` from the model output.

```
## s(sleep_z):time  1.000  1.000  0.139  0.709
```

Below are plots of a plot of `s(bl_age)`, `s(bl_age):sleep_z`, `s(bl_age):time`, and `s(sleep_z):time`. For `s(sleep_z):time`, roughly, if we cannot fit a straight line through the confidence bands, there is evidence that the effect of time depends on sleep duration. It is correct that the confidence interval is zero at one point along the axis; this happens because we do not include the main effect.

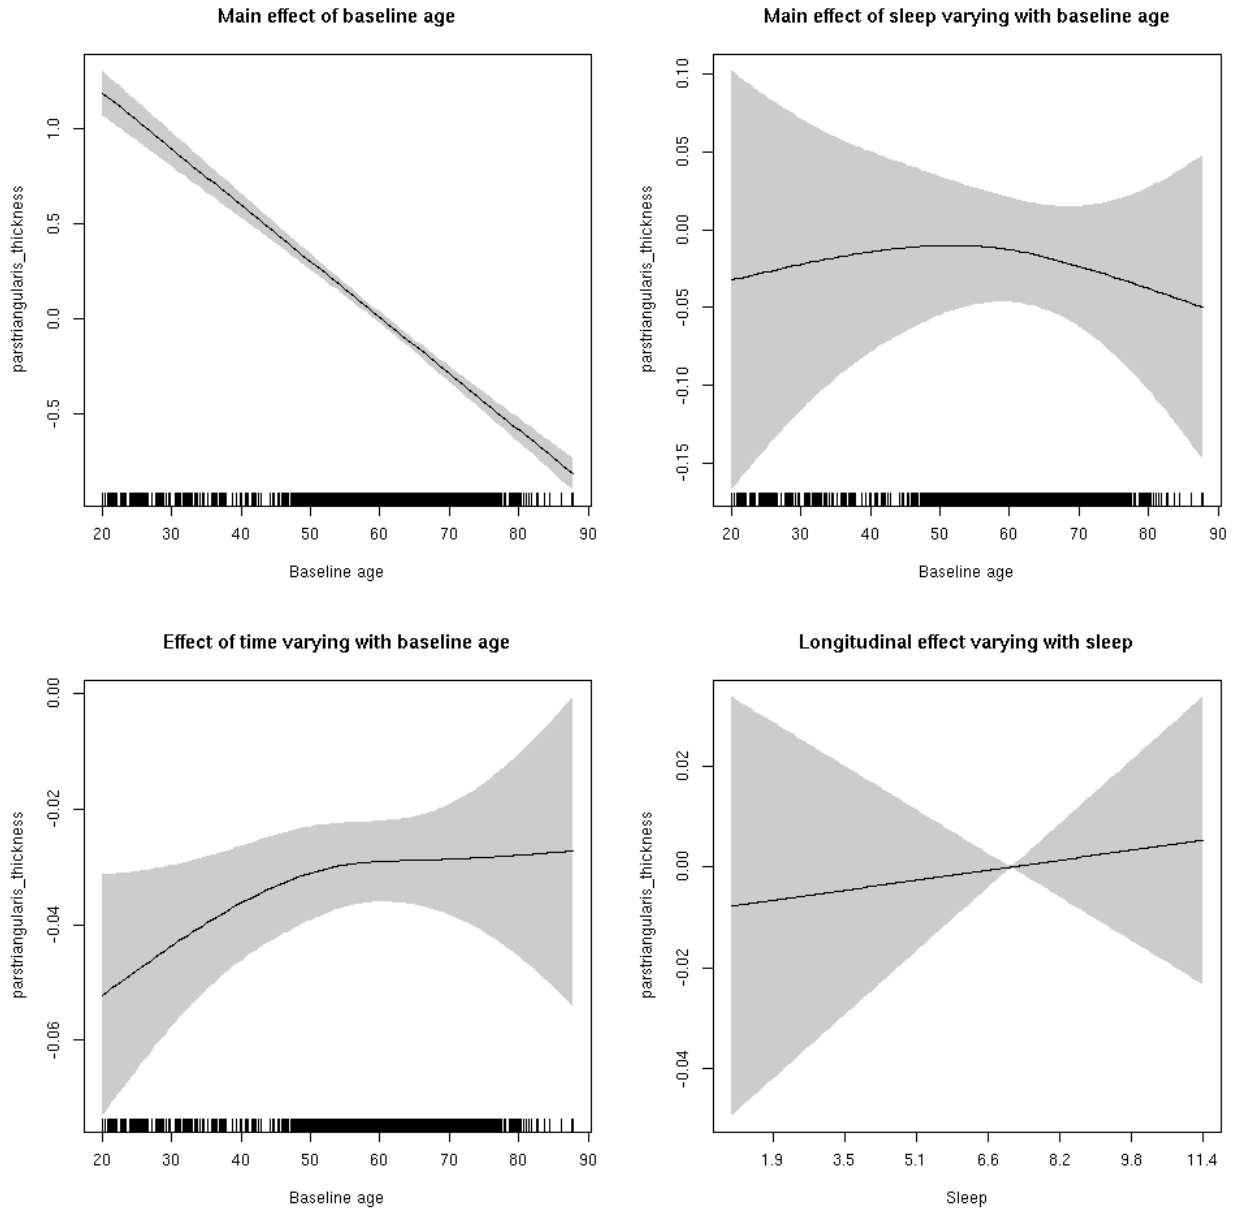

**Male: Full data** Below is the row for `s(sleep_z):time` from the model output.

```
## s(sleep_z):time  3.008  3.008  3.086  0.0291 *
```

Below are plots of a plot of `s(bl_age)`, `s(bl_age):sleep_z`, `s(bl_age):time`, and `s(sleep_z):time`. For `s(sleep_z):time`, roughly, if we cannot fit a straight line through the confidence bands, there is evidence that the effect of time depends on sleep duration. It is correct that the confidence interval is zero at one point along the axis; this happens because we do not include the main effect.

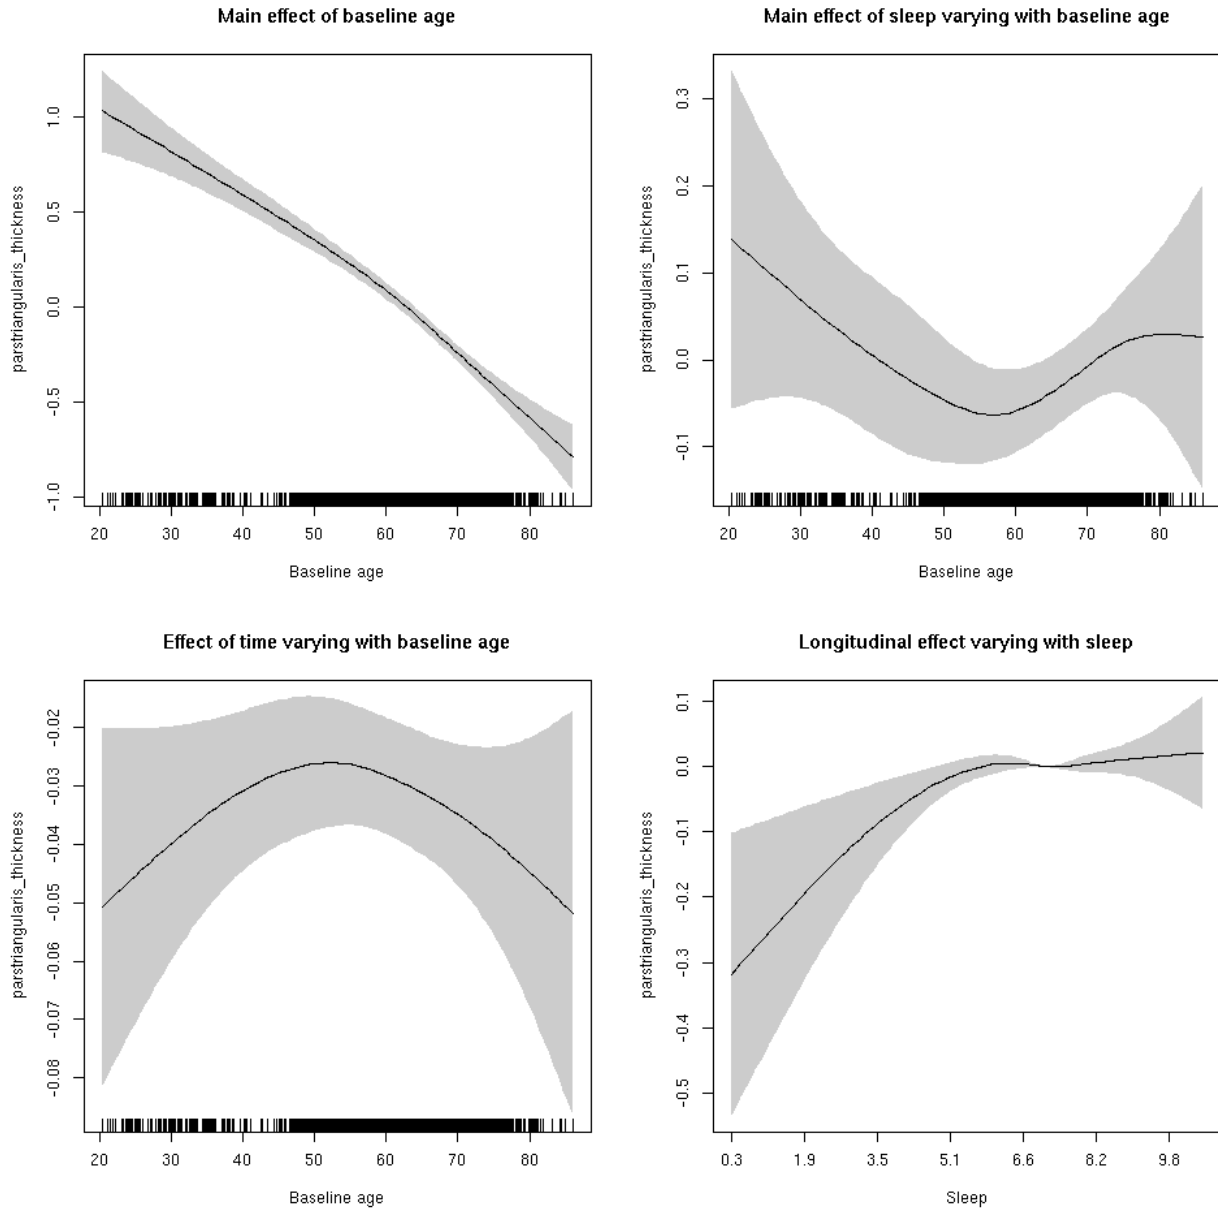

## parstriangularis\_thickness

**Full data** Below is the model output. The term `s(sleep_z):time` is probably what we care most about.

```
##
## Family: gaussian
## Link function: identity
##
## Formula:
## value ~ sex + site + s(bl_age, k = 10, bs = "cr") + s(bl_age,
##   by = sleep_z, bs = "cr") + +s(bl_age, by = time, k = 5, bs = "cr") +
##   s(sleep_z, by = time, k = 5, bs = "cr", pc = 0)
## <environment: 0x5630035d26c8>
```



```

##
## Parametric coefficients:
##           Estimate Std. Error t value Pr(>|t|)
## (Intercept) -1.838519  0.042536 -43.223 < 2e-16 ***
## sexmale     -0.006378  0.021513  -0.296 0.766861
## siteousAvanto 0.208769  0.056730   3.680 0.000235 ***
## siteousPrisma 0.376239  0.232157   1.621 0.105138
## siteousSkyra -0.021248  0.056690  -0.375 0.707803
## siteUB       0.394053  0.113851   3.461 0.000541 ***
## siteUCAM     0.337054  0.058403   5.771 8.16e-09 ***
## siteUKB      2.154408  0.042827  50.305 < 2e-16 ***
## siteUmU     -0.247174  0.070496  -3.506 0.000457 ***
## ---
## Signif. codes:  0 '***' 0.001 '**' 0.01 '*' 0.05 '.' 0.1 ' ' 1
##
## Approximate significance of smooth terms:
##           edf Ref.df      F p-value
## s(bl_age)      2.113  2.113 382.702 <2e-16 ***
## s(bl_age):sleep_z 2.000  2.000   1.597  0.2026
## s(bl_age):time  3.166  3.166  39.527 <2e-16 ***
## s(sleep_z):time  3.280  3.280   2.580  0.0284 *
## ---
## Signif. codes:  0 '***' 0.001 '**' 0.01 '*' 0.05 '.' 0.1 ' ' 1
##
## R-sq.(adj) =  0.649
## lmer.REML = 12600  Scale est. = 0.09133  n = 8162

```

Below are plots of a plot of `s(bl_age)`, `s(bl_age):sleep_z`, `s(bl_age):time`, and `s(sleep_z):time`. For `s(sleep_z):time`, roughly, if we cannot fit a straight line through the confidence bands, there is evidence that the effect of time depends on sleep duration. It is correct that the confidence interval is zero at one point along the axis; this happens because we do not include the main effect.

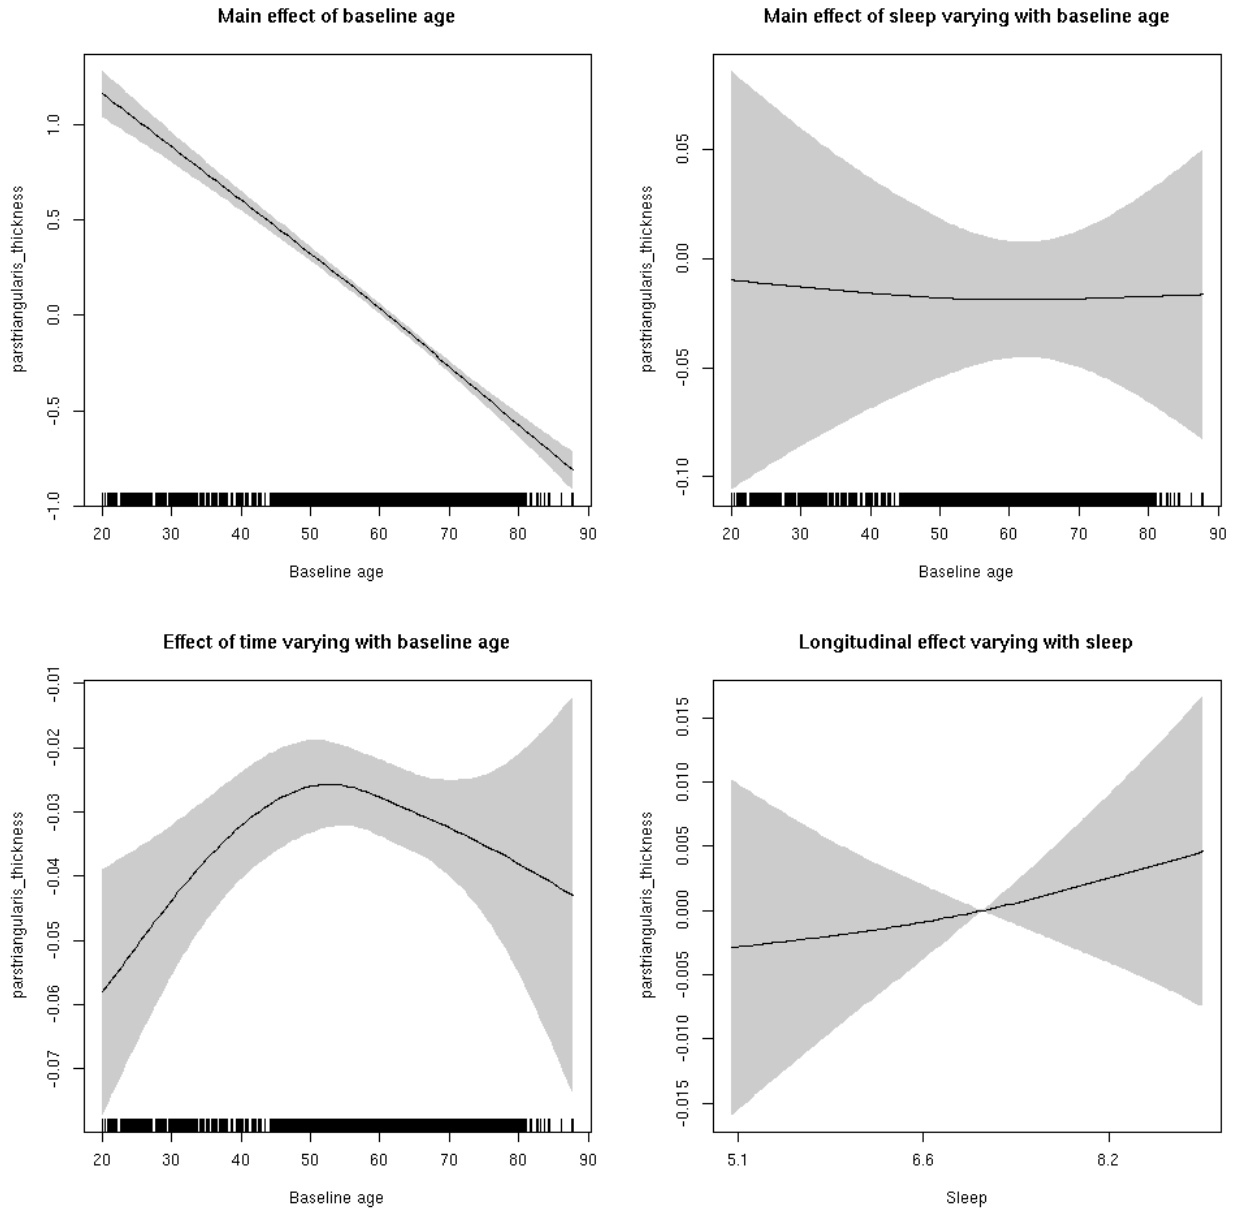

**Restricted to sleep  $\geq 5$  and  $\leq 9$  hours** Below is the row for `s(sleep_z):time` from the model output.

```
## s(sleep_z):time  1.108  1.108  0.299  0.552
```

Below are plots of a plot of `s(bl_age)`, `s(bl_age):sleep_z`, `s(bl_age):time`, and `s(sleep_z):time`. For `s(sleep_z):time`, roughly, if we cannot fit a straight line through the confidence bands, there is evidence that the effect of time depends on sleep duration. It is correct that the confidence interval is zero at one point along the axis; this happens because we do not include the main effect.



### parstriangularis\_volume: Stratified by sex

**Female: Full data** Below is the row for `s(sleep_z):time` from the model output.

```
## s(sleep_z):time  1.000  1.000  0.057  0.812
```

Below are plots of a plot of `s(bl_age)`, `s(bl_age):sleep_z`, `s(bl_age):time`, and `s(sleep_z):time`. For `s(sleep_z):time`, roughly, if we cannot fit a straight line through the confidence bands, there is evidence that the effect of time depends on sleep duration. It is correct that the confidence interval is zero at one point along the axis; this happens because we do not include the main effect.

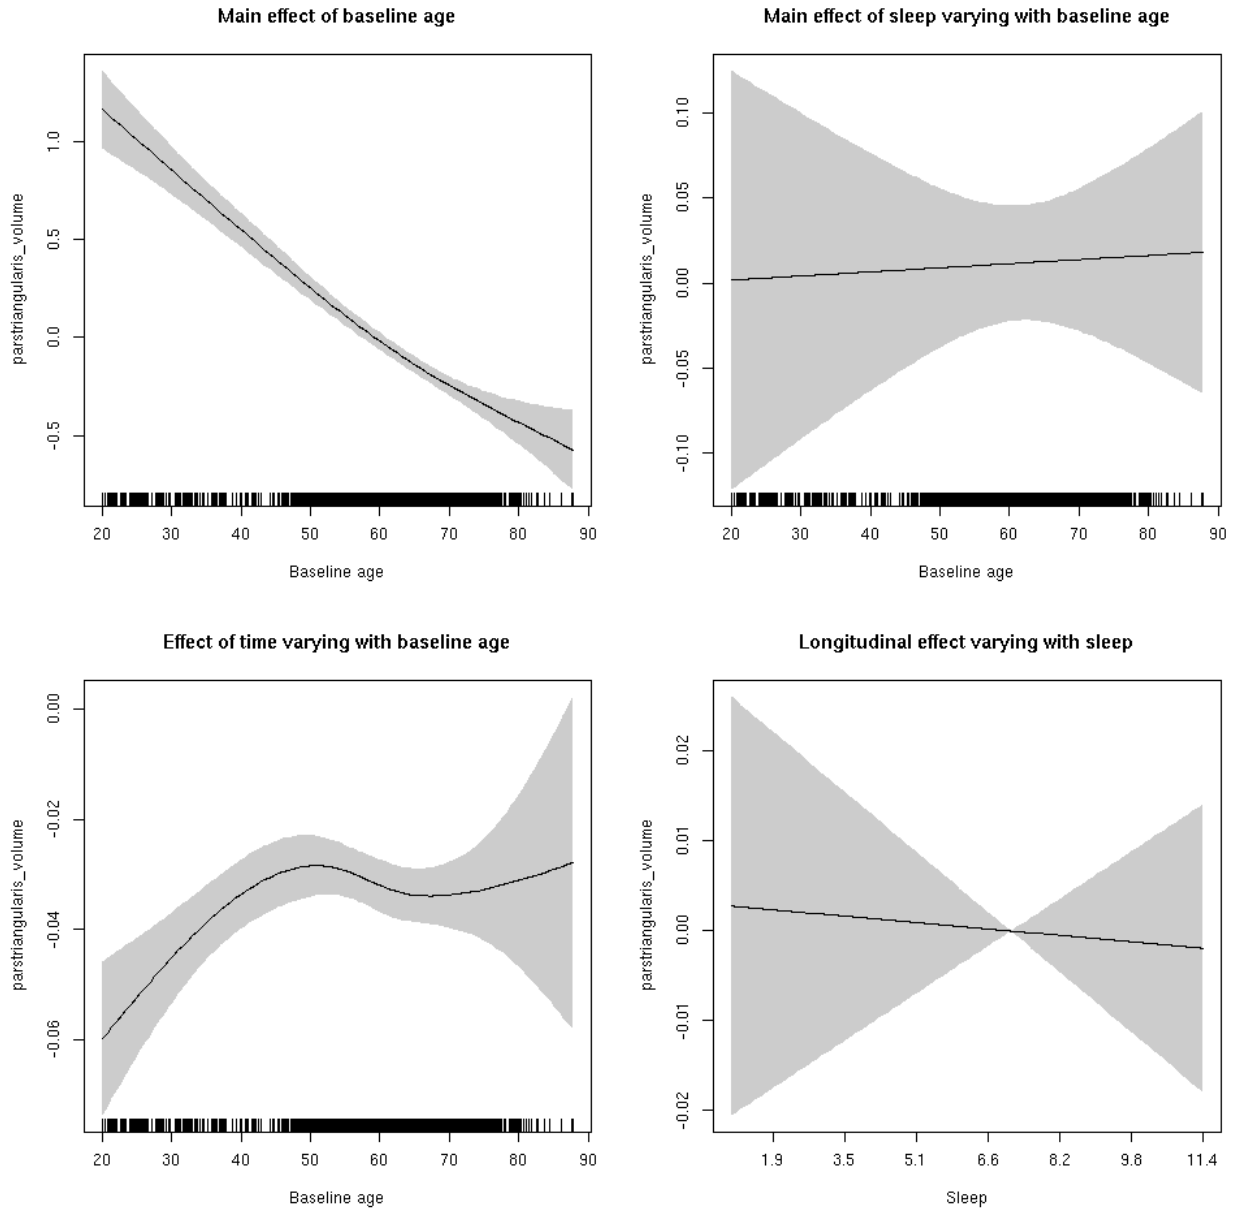

**Male: Full data** Below is the row for `s(sleep_z):time` from the model output.

```
## s(sleep_z):time  1.000  1.000  1.019  0.313
```

Below are plots of a plot of `s(bl_age)`, `s(bl_age):sleep_z`, `s(bl_age):time`, and `s(sleep_z):time`. For `s(sleep_z):time`, roughly, if we cannot fit a straight line through the confidence bands, there is evidence that the effect of time depends on sleep duration. It is correct that the confidence interval is zero at one point along the axis; this happens because we do not include the main effect.

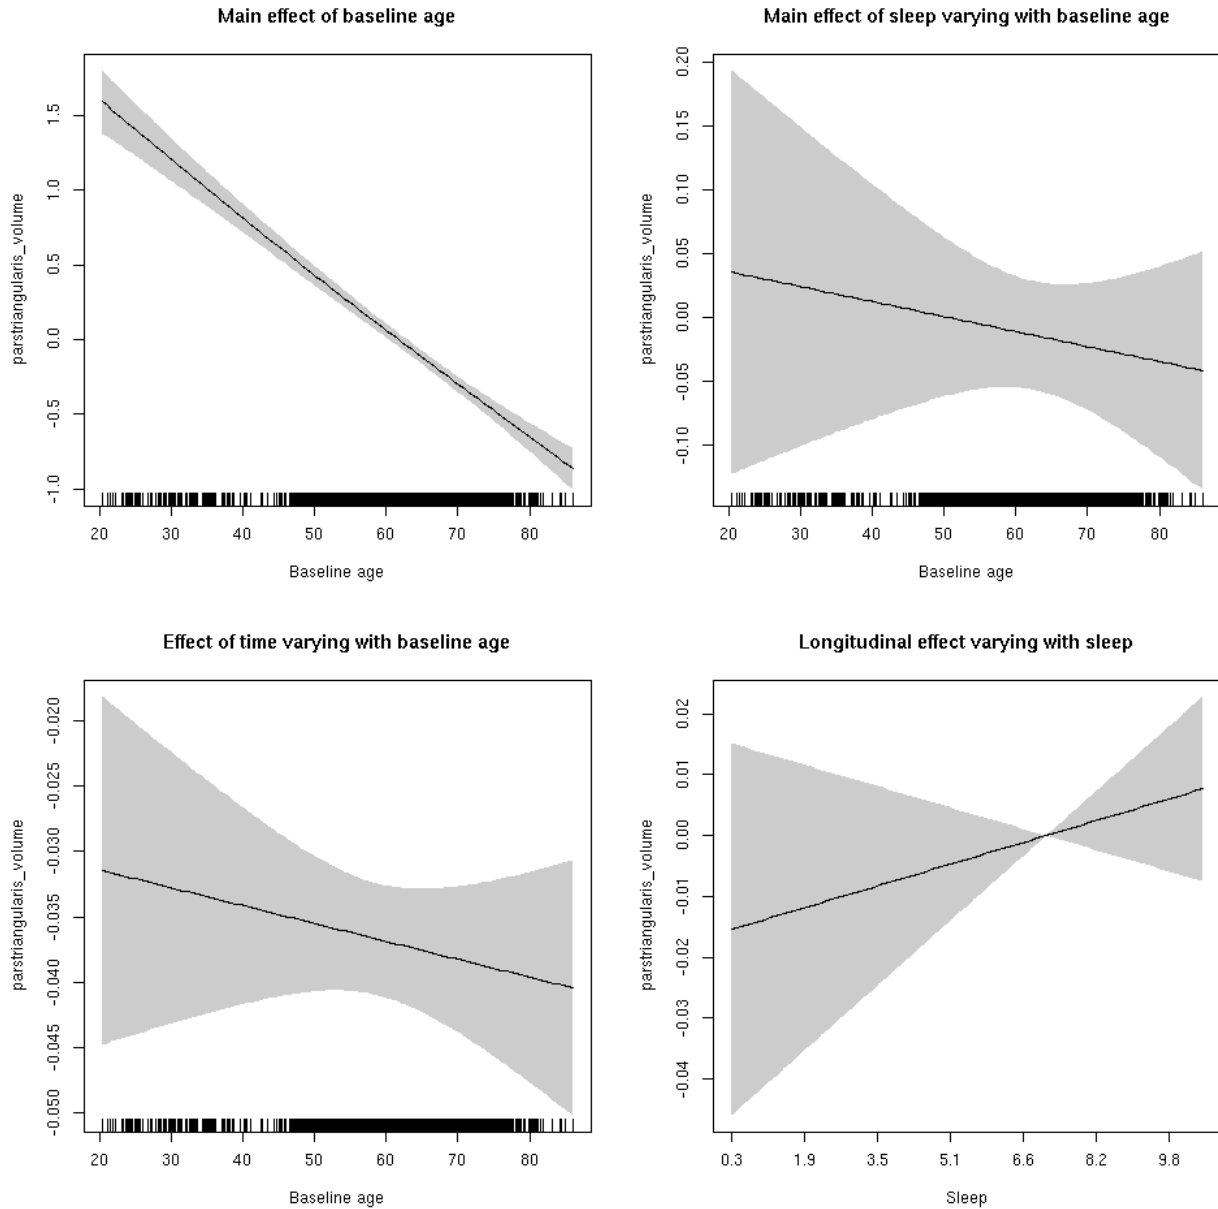

## parstriangularis\_volume

**Full data** Below is the model output. The term `s(sleep_z):time` is probably what we care most about.

```
##
## Family: gaussian
## Link function: identity
##
## Formula:
## value ~ sex + site + icv + s(bl_age, k = 10, bs = "cr") + s(bl_age,
##   by = sleep_z, bs = "cr") + +s(bl_age, by = time, k = 5, bs = "cr") +
##   s(sleep_z, by = time, k = 5, bs = "cr", pc = 0)
## <environment: 0x5630035a94c8>
```

```

##
## Parametric coefficients:
##           Estimate Std. Error t value Pr(>|t|)
## (Intercept) -0.05023   0.06141  -0.818 0.413473
## sexmale      0.25211   0.03166   7.964 1.89e-15 ***
## siteousAvanto -0.62402   0.07502  -8.318 < 2e-16 ***
## siteousPrisma -0.52966   0.15400  -3.439 0.000586 ***
## siteousSkyra  -0.34706   0.07267  -4.776 1.82e-06 ***
## siteUB        -0.46156   0.14214  -3.247 0.001171 **
## siteUCAM      -0.51042   0.07608  -6.709 2.09e-11 ***
## siteUKB        0.09208   0.05803   1.587 0.112566
## siteUmU       -0.38307   0.08789  -4.358 1.33e-05 ***
## icv           0.39802   0.01551  25.663 < 2e-16 ***
## ---
## Signif. codes:  0 '***' 0.001 '**' 0.01 '*' 0.05 '.' 0.1 ' ' 1
##
## Approximate significance of smooth terms:
##           edf Ref.df      F p-value
## s(bl_age)      2.039  2.039 325.883 <2e-16 ***
## s(bl_age):sleep_z 2.201  2.201   0.159  0.8337
## s(bl_age):time  3.782  3.782 106.192 <2e-16 ***
## s(sleep_z):time  3.378  3.378   2.094  0.0491 *
## ---
## Signif. codes:  0 '***' 0.001 '**' 0.01 '*' 0.05 '.' 0.1 ' ' 1
##
## R-sq.(adj) =  0.371
## lmer.REML = 9442.5  Scale est. = 0.029965  n = 8168

```

Below are plots of a plot of `s(bl_age)`, `s(bl_age):sleep_z`, `s(bl_age):time`, and `s(sleep_z):time`. For `s(sleep_z):time`, roughly, if we cannot fit a straight line through the confidence bands, there is evidence that the effect of time depends on sleep duration. It is correct that the confidence interval is zero at one point along the axis; this happens because we do not include the main effect.

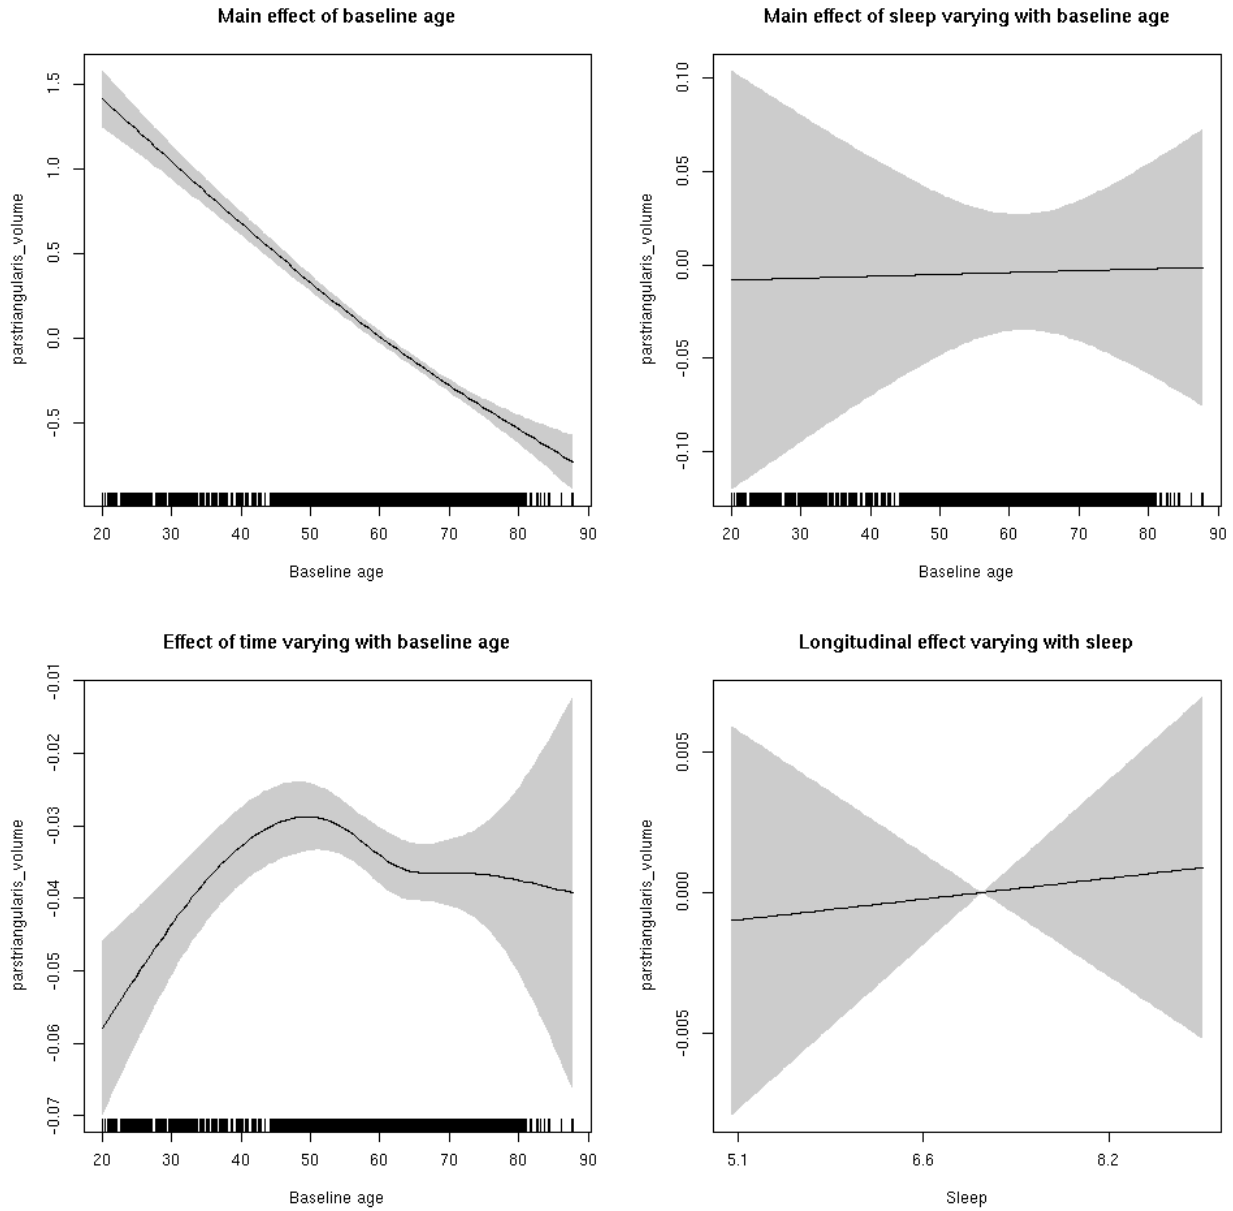

**Restricted to sleep  $\geq 5$  and  $\leq 9$  hours** Below is the row for `s(sleep_z):time` from the model output.

```
## s(sleep_z):time  1.000  1.000  0.084  0.772
```

Below are plots of a plot of `s(bl_age)`, `s(bl_age):sleep_z`, `s(bl_age):time`, and `s(sleep_z):time`. For `s(sleep_z):time`, roughly, if we cannot fit a straight line through the confidence bands, there is evidence that the effect of time depends on sleep duration. It is correct that the confidence interval is zero at one point along the axis; this happens because we do not include the main effect.

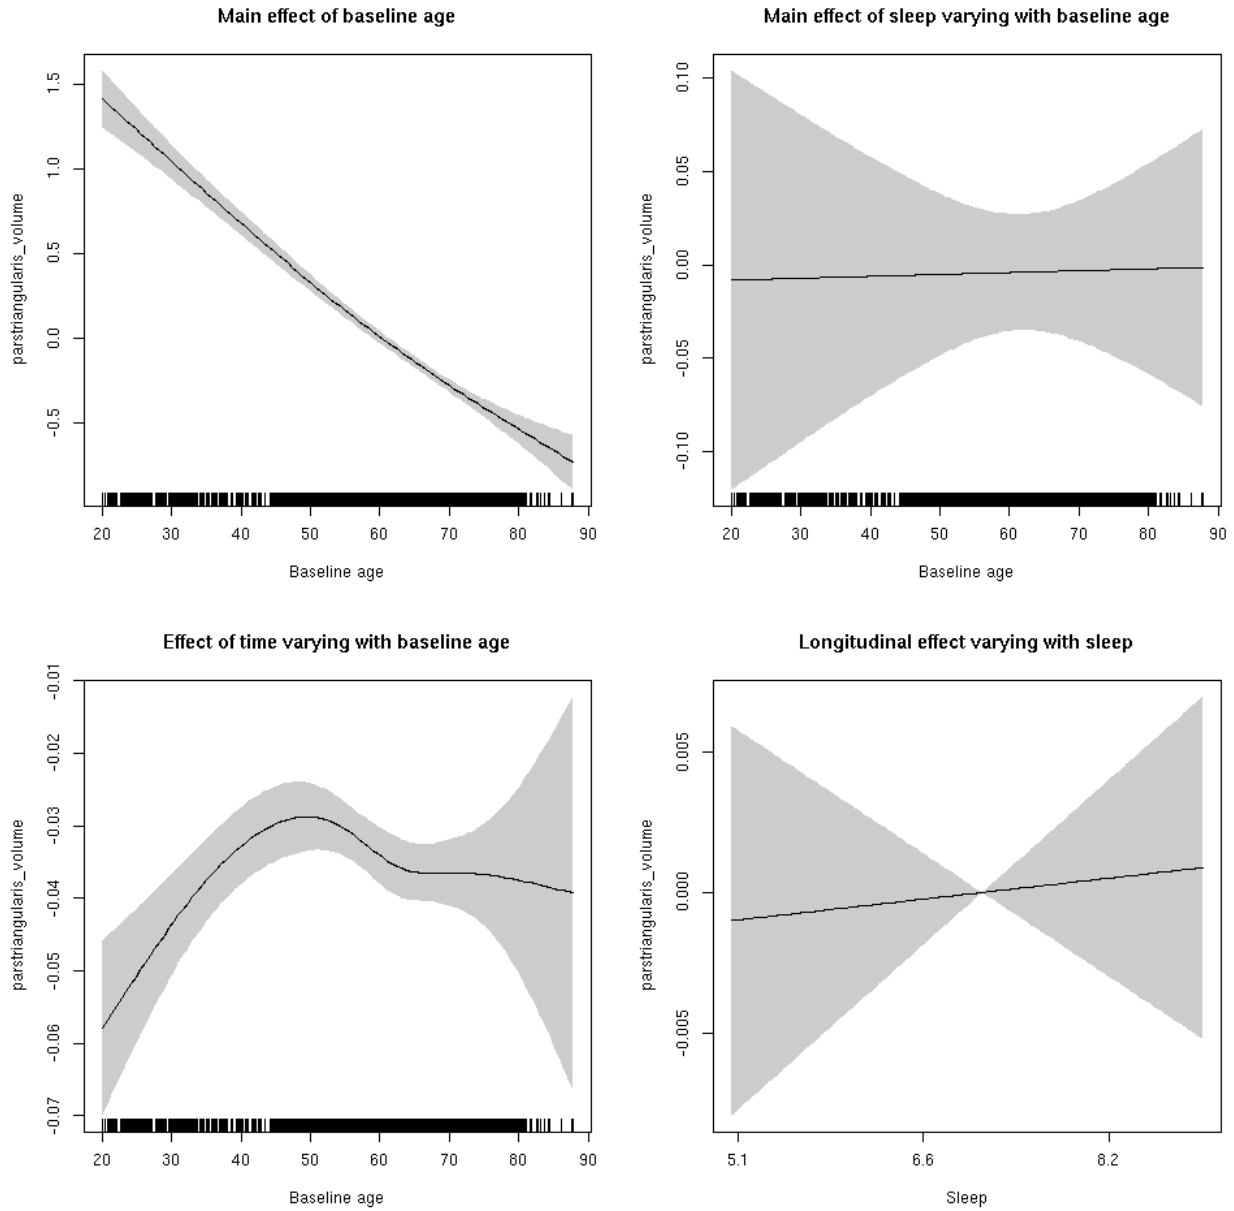

## pericalcarine\_area: Stratified by sex

**Female: Full data** Below is the row for `s(sleep_z):time` from the model output.

```
## s(sleep_z):time  1.000  1.000  0.476  0.4902
```

Below are plots of a plot of `s(bl_age)`, `s(bl_age):sleep_z`, `s(bl_age):time`, and `s(sleep_z):time`. For `s(sleep_z):time`, roughly, if we cannot fit a straight line through the confidence bands, there is evidence that the effect of time depends on sleep duration. It is correct that the confidence interval is zero at one point along the axis; this happens because we do not include the main effect.



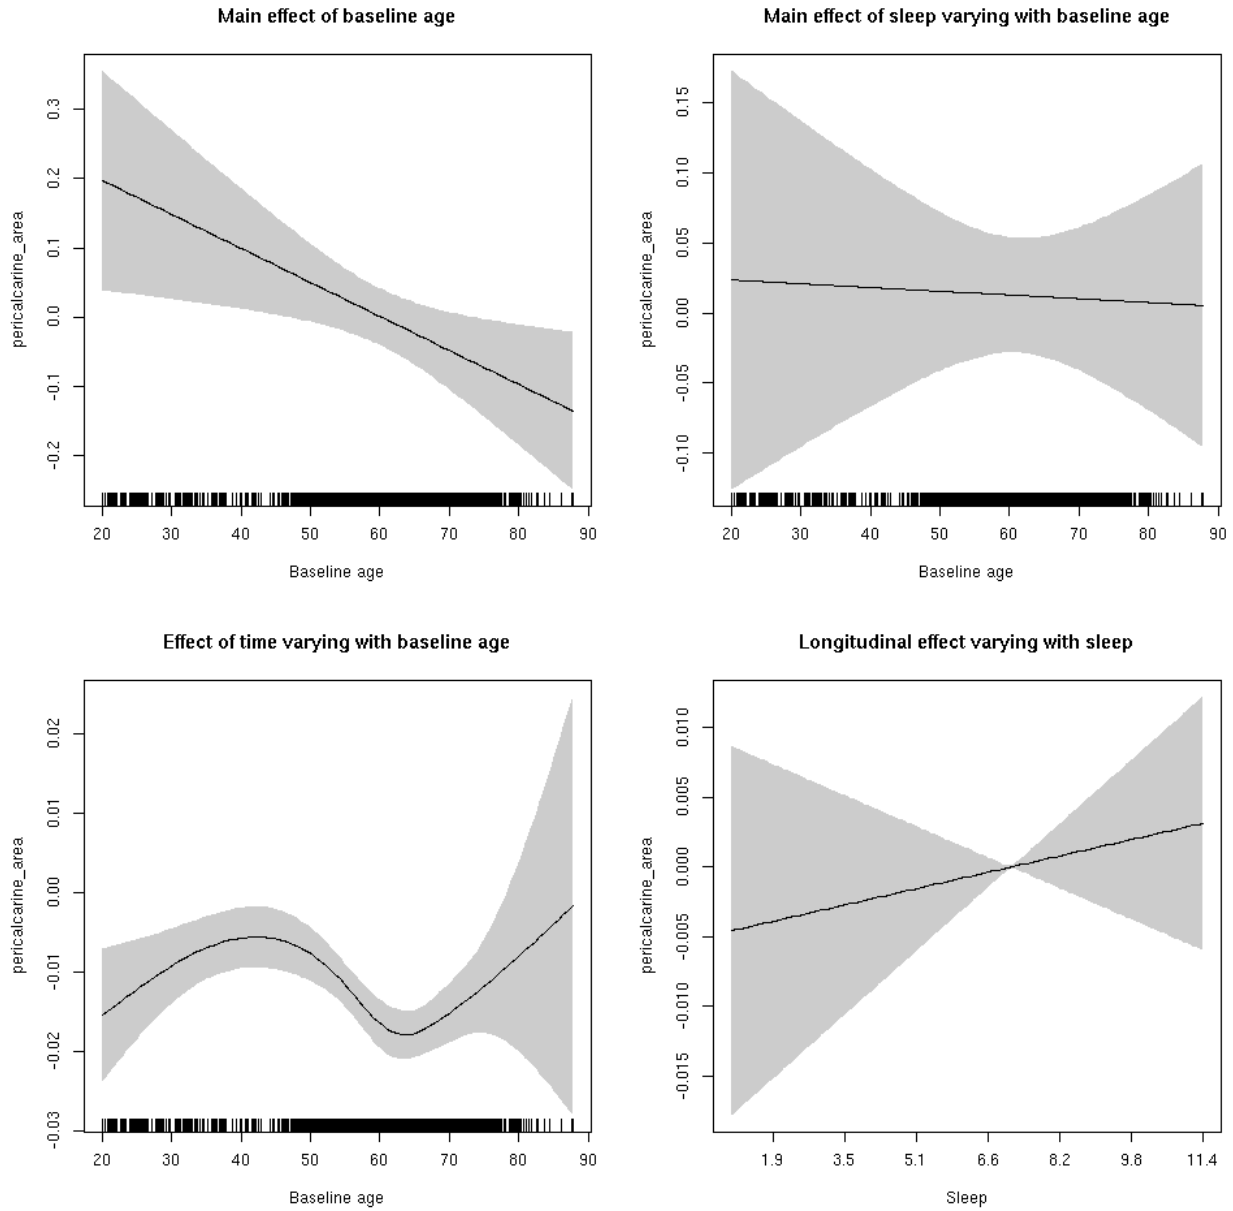

**Male: Full data** Below is the row for `s(sleep_z):time` from the model output.

```
## s(sleep_z):time      1      1  1.171  0.279
```

Below are plots of a plot of `s(bl_age)`, `s(bl_age):sleep_z`, `s(bl_age):time`, and `s(sleep_z):time`. For `s(sleep_z):time`, roughly, if we cannot fit a straight line through the confidence bands, there is evidence that the effect of time depends on sleep duration. It is correct that the confidence interval is zero at one point along the axis; this happens because we do not include the main effect.

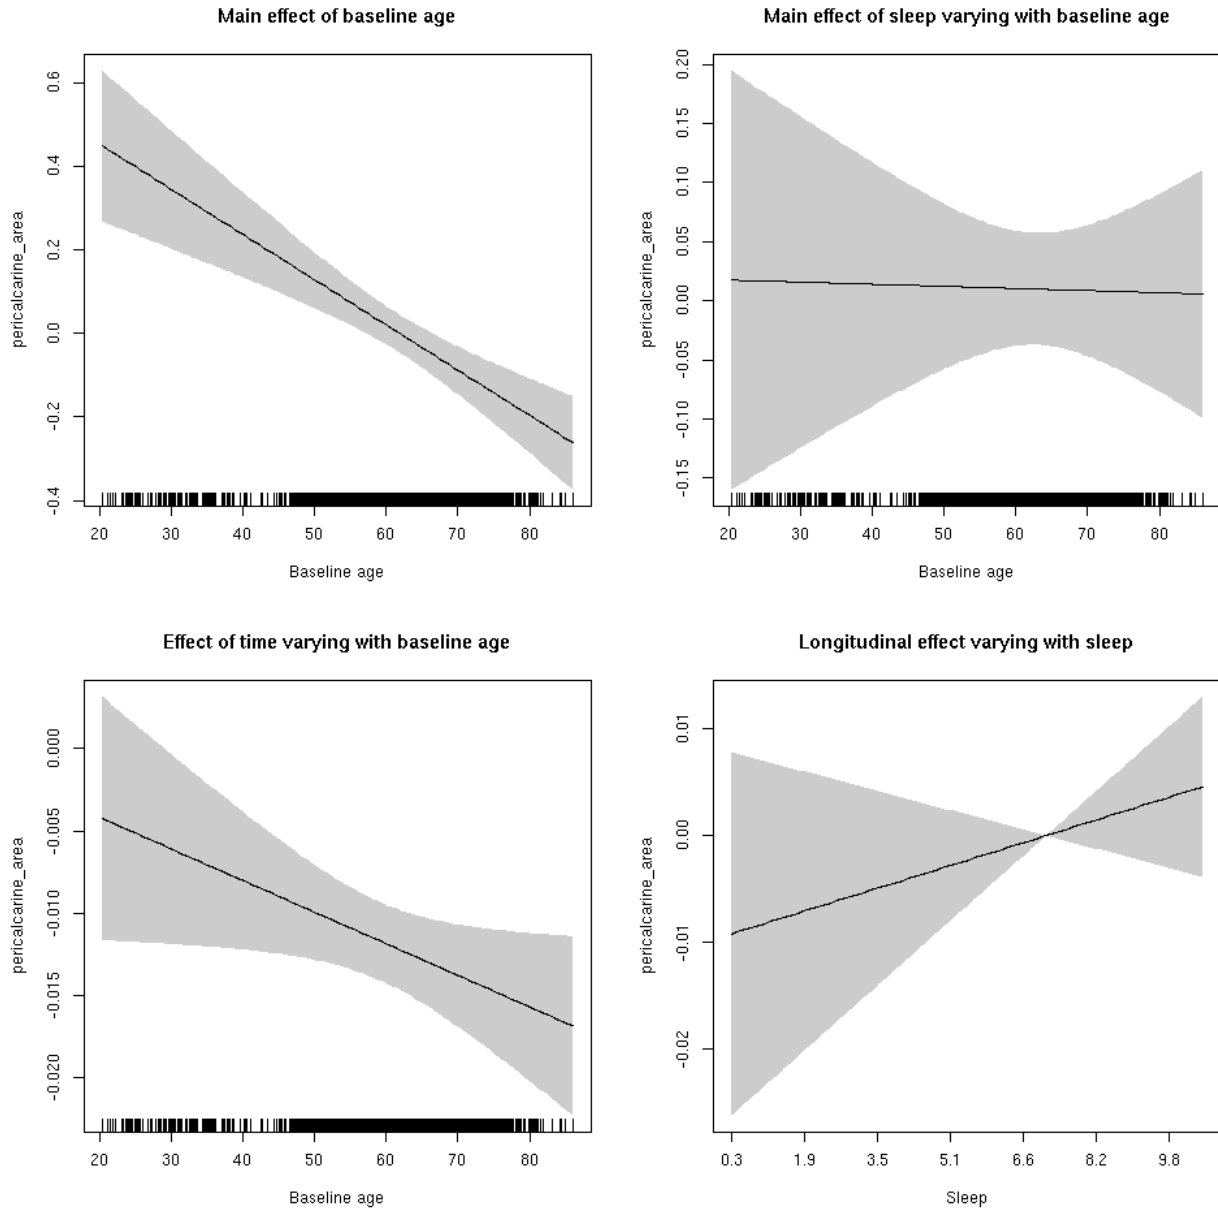

## pericalcarine\_area

**Full data** Below is the model output. The term `s(sleep_z):time` is probably what we care most about.

```
##
## Family: gaussian
## Link function: identity
##
## Formula:
## value ~ sex + site + icv + s(bl_age, k = 10, bs = "cr") + s(bl_age,
##   by = sleep_z, bs = "cr") + +s(bl_age, by = time, k = 5, bs = "cr") +
##   s(sleep_z, by = time, k = 5, bs = "cr", pc = 0)
## <environment: 0x5630035a87d0>
```

```

##
## Parametric coefficients:
##           Estimate Std. Error t value Pr(>|t|)
## (Intercept)   0.46287   0.06936   6.673 2.67e-11 ***
## sexmale       0.22109   0.03603   6.136 8.87e-10 ***
## siteousAvanto -0.24667   0.08563  -2.881 0.00398 **
## siteousPrisma -0.47009   0.11618  -4.046 5.25e-05 ***
## siteousSkyra  -0.16464   0.08320  -1.979 0.04788 *
## siteUB        -0.28019   0.16511  -1.697 0.08973 .
## siteUCAM      -0.41498   0.08745  -4.745 2.12e-06 ***
## siteUKB       -0.56913   0.06508  -8.745 < 2e-16 ***
## siteUmU       -0.71830   0.10141  -7.083 1.53e-12 ***
## icv           0.23280   0.01682  13.841 < 2e-16 ***
## ---
## Signif. codes:  0 '***' 0.001 '**' 0.01 '*' 0.05 '.' 0.1 ' ' 1
##
## Approximate significance of smooth terms:
##           edf Ref.df      F p-value
## s(bl_age)      1.000  1.000 30.504 <2e-16 ***
## s(bl_age):sleep_z 2.000  2.000  0.261  0.771
## s(bl_age):time  4.057  4.057 57.407 <2e-16 ***
## s(sleep_z):time  2.104  2.104  2.779  0.088 .
## ---
## Signif. codes:  0 '***' 0.001 '**' 0.01 '*' 0.05 '.' 0.1 ' ' 1
##
## R-sq.(adj) =  0.138
## lmer.REML = 5666.8 Scale est. = 0.0094353 n = 8160

```

Below are plots of a plot of `s(bl_age)`, `s(bl_age):sleep_z`, `s(bl_age):time`, and `s(sleep_z):time`. For `s(sleep_z):time`, roughly, if we cannot fit a straight line through the confidence bands, there is evidence that the effect of time depends on sleep duration. It is correct that the confidence interval is zero at one point along the axis; this happens because we do not include the main effect.

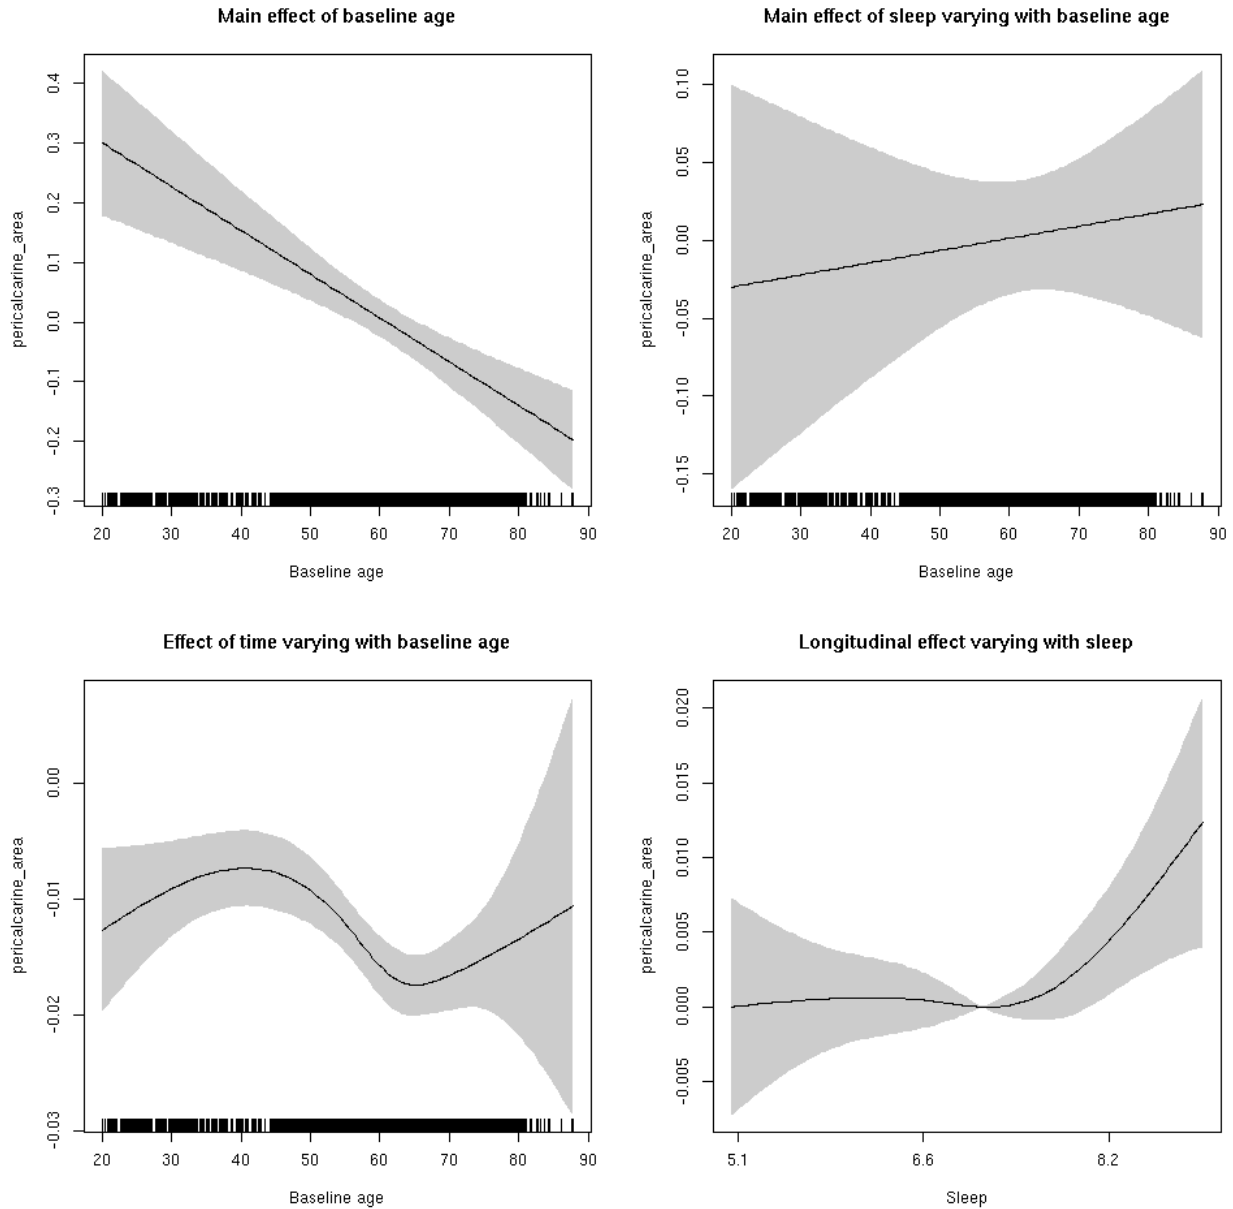

**Restricted to sleep  $\geq 5$  and  $\leq 9$  hours** Below is the row for `s(sleep_z):time` from the model output.

```
## s(sleep_z):time  2.569  2.569  2.470  0.0416 *
```

Below are plots of a plot of `s(bl_age)`, `s(bl_age):sleep_z`, `s(bl_age):time`, and `s(sleep_z):time`. For `s(sleep_z):time`, roughly, if we cannot fit a straight line through the confidence bands, there is evidence that the effect of time depends on sleep duration. It is correct that confidence interval is zero at one point along the axis; this happens because we do not include the main effect.



## pericalcarine\_thickness: Stratified by sex

**Female: Full data** Below is the row for `s(sleep_z):time` from the model output.

```
## s(sleep_z):time  1.000  1.000  0.402  0.5261
```

Below are plots of a plot of `s(bl_age)`, `s(bl_age):sleep_z`, `s(bl_age):time`, and `s(sleep_z):time`. For `s(sleep_z):time`, roughly, if we cannot fit a straight line through the confidence bands, there is evidence that the effect of time depends on sleep duration. It is correct that the confidence interval is zero at one point along the axis; this happens because we do not include the main effect.

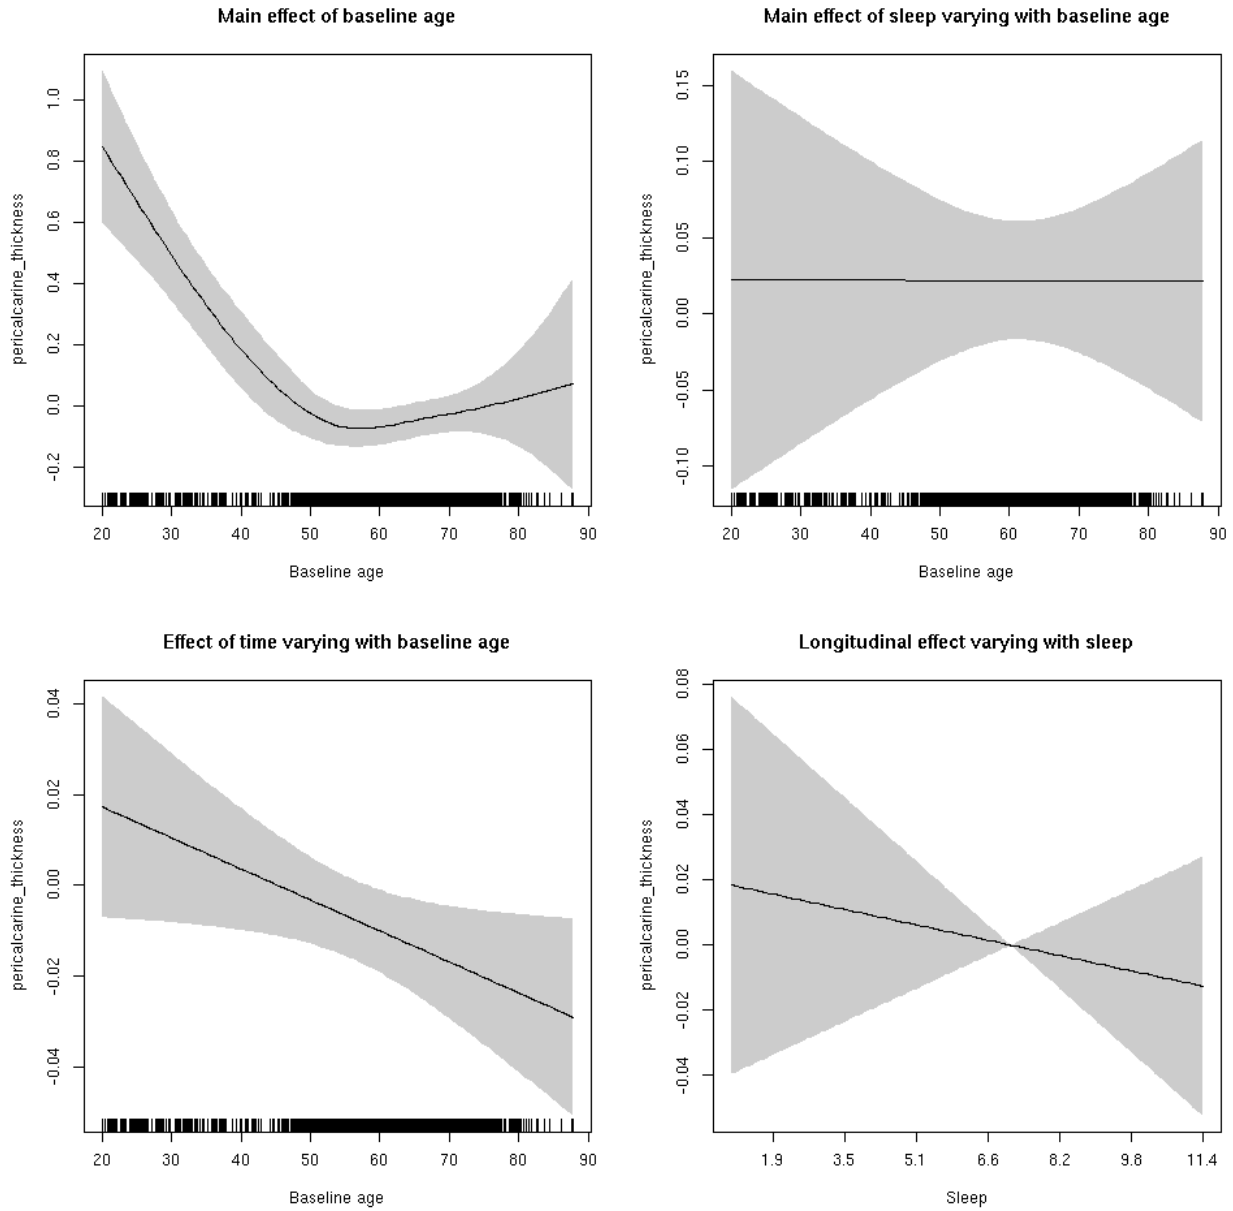

**Male: Full data** Below is the row for `s(sleep_z):time` from the model output.

```
## s(sleep_z):time  1.000  1.000  0.583  0.445230
```

Below are plots of a plot of `s(bl_age)`, `s(bl_age):sleep_z`, `s(bl_age):time`, and `s(sleep_z):time`. For `s(sleep_z):time`, roughly, if we cannot fit a straight line through the confidence bands, there is evidence that the effect of time depends on sleep duration. It is correct that the confidence interval is zero at one point along the axis; this happens because we do not include the main effect.

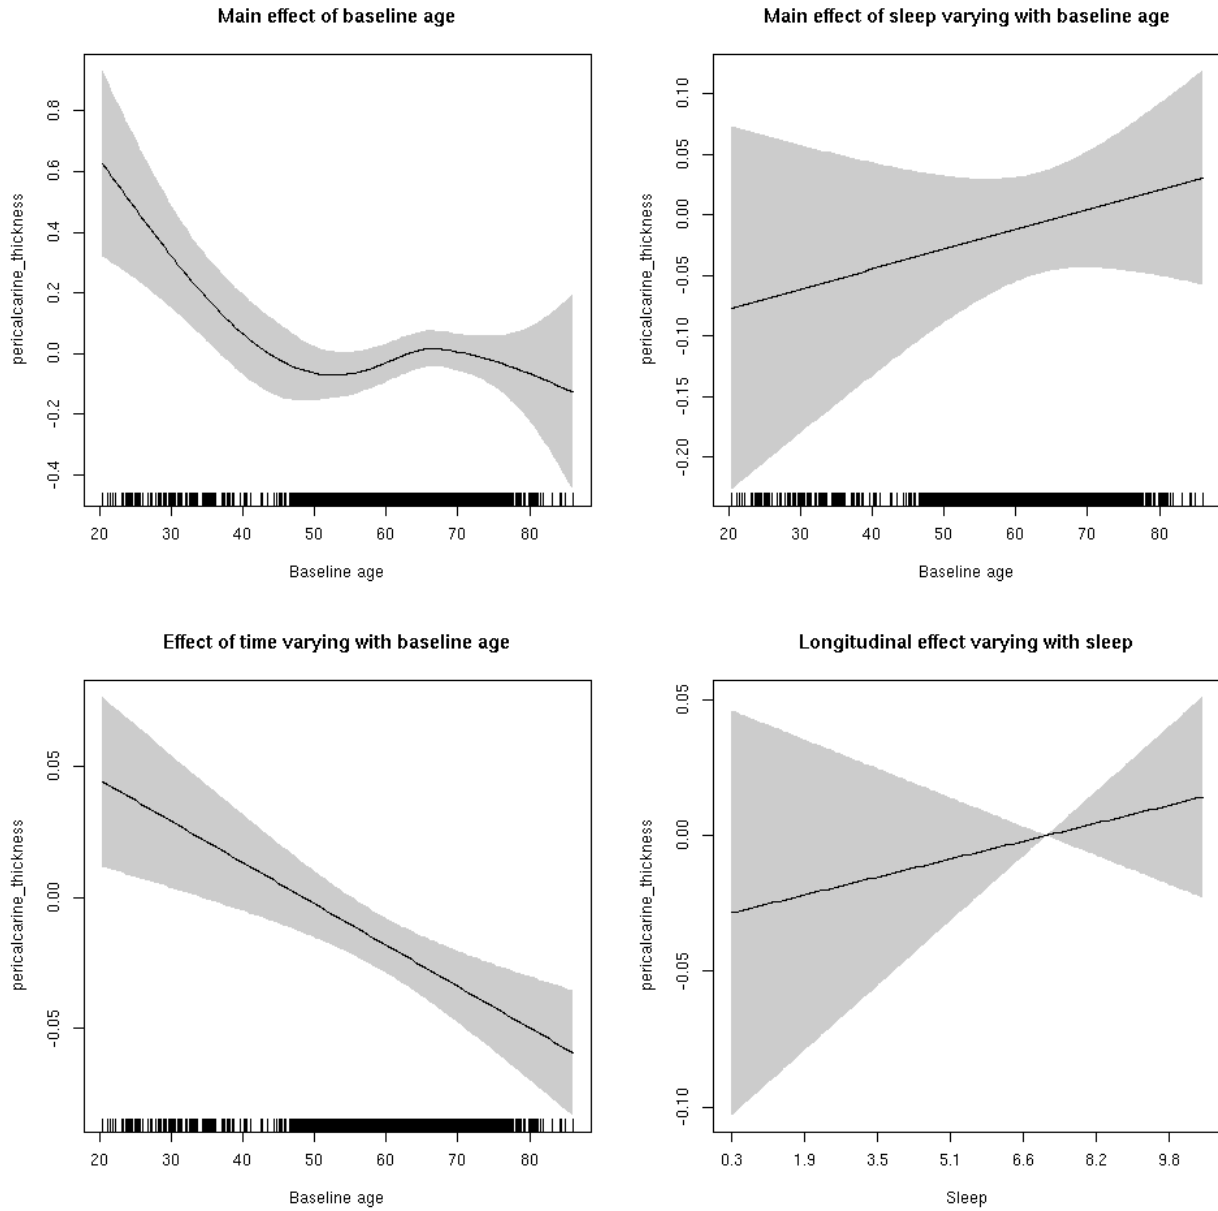

## pericalcarine\_thickness

**Full data** Below is the model output. The term `s(sleep_z):time` is probably what we care most about.

```
##
## Family: gaussian
## Link function: identity
##
## Formula:
## value ~ sex + site + s(bl_age, k = 10, bs = "cr") + s(bl_age,
##   by = sleep_z, bs = "cr") + +s(bl_age, by = time, k = 5, bs = "cr") +
##   s(sleep_z, by = time, k = 5, bs = "cr", pc = 0)
## <environment: 0x5630035cf7d8>
```

```

##
## Parametric coefficients:
##           Estimate Std. Error t value Pr(>|t|)
## (Intercept) -0.79130    0.05345 -14.805 < 2e-16 ***
## sexmale      0.13391    0.02675   5.006 5.68e-07 ***
## siteousAvanto -0.70032    0.07138  -9.811 < 2e-16 ***
## siteousPrisma  0.65729    0.33003   1.992 0.04645 *
## siteousSkyra  1.30147    0.07133  18.245 < 2e-16 ***
## siteUB        0.52717    0.14118   3.734 0.00019 ***
## siteUCAM      -0.16864    0.07361  -2.291 0.02199 *
## siteUKB       0.81987    0.05417  15.135 < 2e-16 ***
## siteUmU       1.16304    0.08805  13.208 < 2e-16 ***
## ---
## Signif. codes:  0 '***' 0.001 '**' 0.01 '*' 0.05 '.' 0.1 ' ' 1
##
## Approximate significance of smooth terms:
##           edf Ref.df      F p-value
## s(bl_age)      3.951  3.951 18.813 <2e-16 ***
## s(bl_age):sleep_z 2.000  2.000  0.277  0.758
## s(bl_age):time  2.000  2.000 16.440 <2e-16 ***
## s(sleep_z):time  1.000  1.000  0.018  0.892
## ---
## Signif. codes:  0 '***' 0.001 '**' 0.01 '*' 0.05 '.' 0.1 ' ' 1
##
## R-sq.(adj) =  0.245
## lmer.REML = 17500 Scale est. = 0.19195 n = 8178

```

Below are plots of a plot of `s(bl_age)`, `s(bl_age):sleep_z`, `s(bl_age):time`, and `s(sleep_z):time`. For `s(sleep_z):time`, roughly, if we cannot fit a straight line through the confidence bands, there is evidence that the effect of time depends on sleep duration. It is correct that the confidence interval is zero at one point along the axis; this happens because we do not include the main effect.



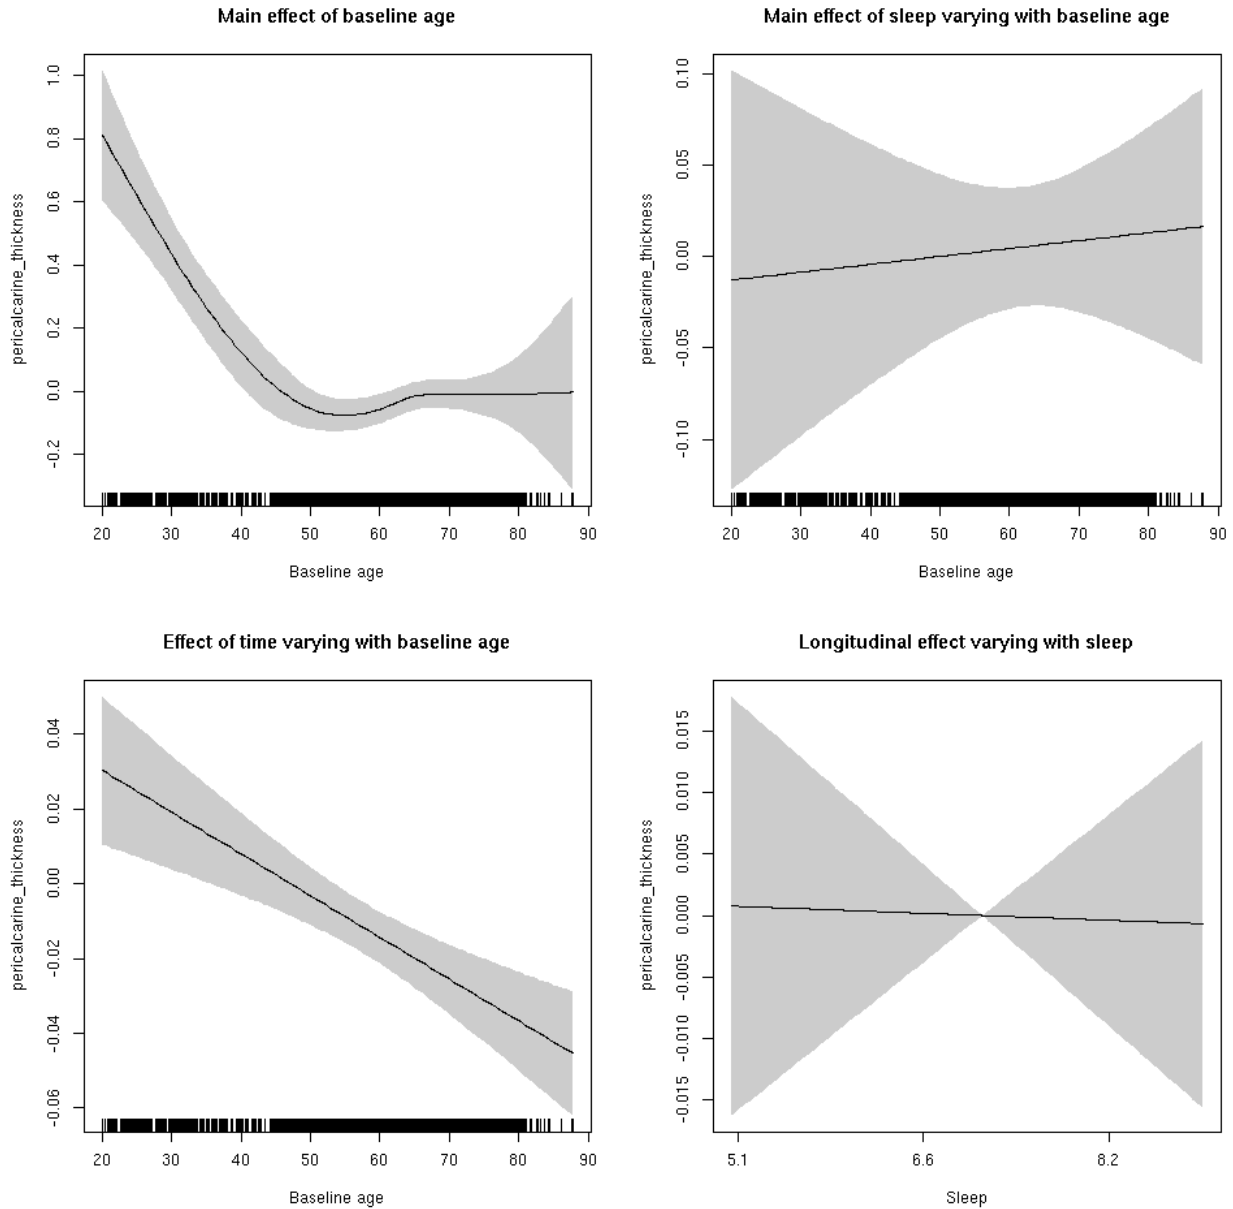

**Restricted to sleep  $\geq 5$  and  $\leq 9$  hours** Below is the row for `s(sleep_z):time` from the model output.

```
## s(sleep_z):time 1.000 1.000 0.008 0.928
```

Below are plots of a plot of `s(bl_age)`, `s(bl_age):sleep_z`, `s(bl_age):time`, and `s(sleep_z):time`. For `s(sleep_z):time`, roughly, if we cannot fit a straight line through the confidence bands, there is evidence that the effect of time depends on sleep duration. It is correct that the confidence interval is zero at one point along the axis; this happens because we do not include the main effect.



## pericalcarine\_volume: Stratified by sex

**Female: Full data** Below is the row for `s(sleep_z):time` from the model output.

```
## s(sleep_z):time  1.000  1.000  3.041  0.0812 .
```

Below are plots of a plot of `s(bl_age)`, `s(bl_age):sleep_z`, `s(bl_age):time`, and `s(sleep_z):time`. For `s(sleep_z):time`, roughly, if we cannot fit a straight line through the confidence bands, there is evidence that the effect of time depends on sleep duration. It is correct that the confidence interval is zero at one point along the axis; this happens because we do not include the main effect.

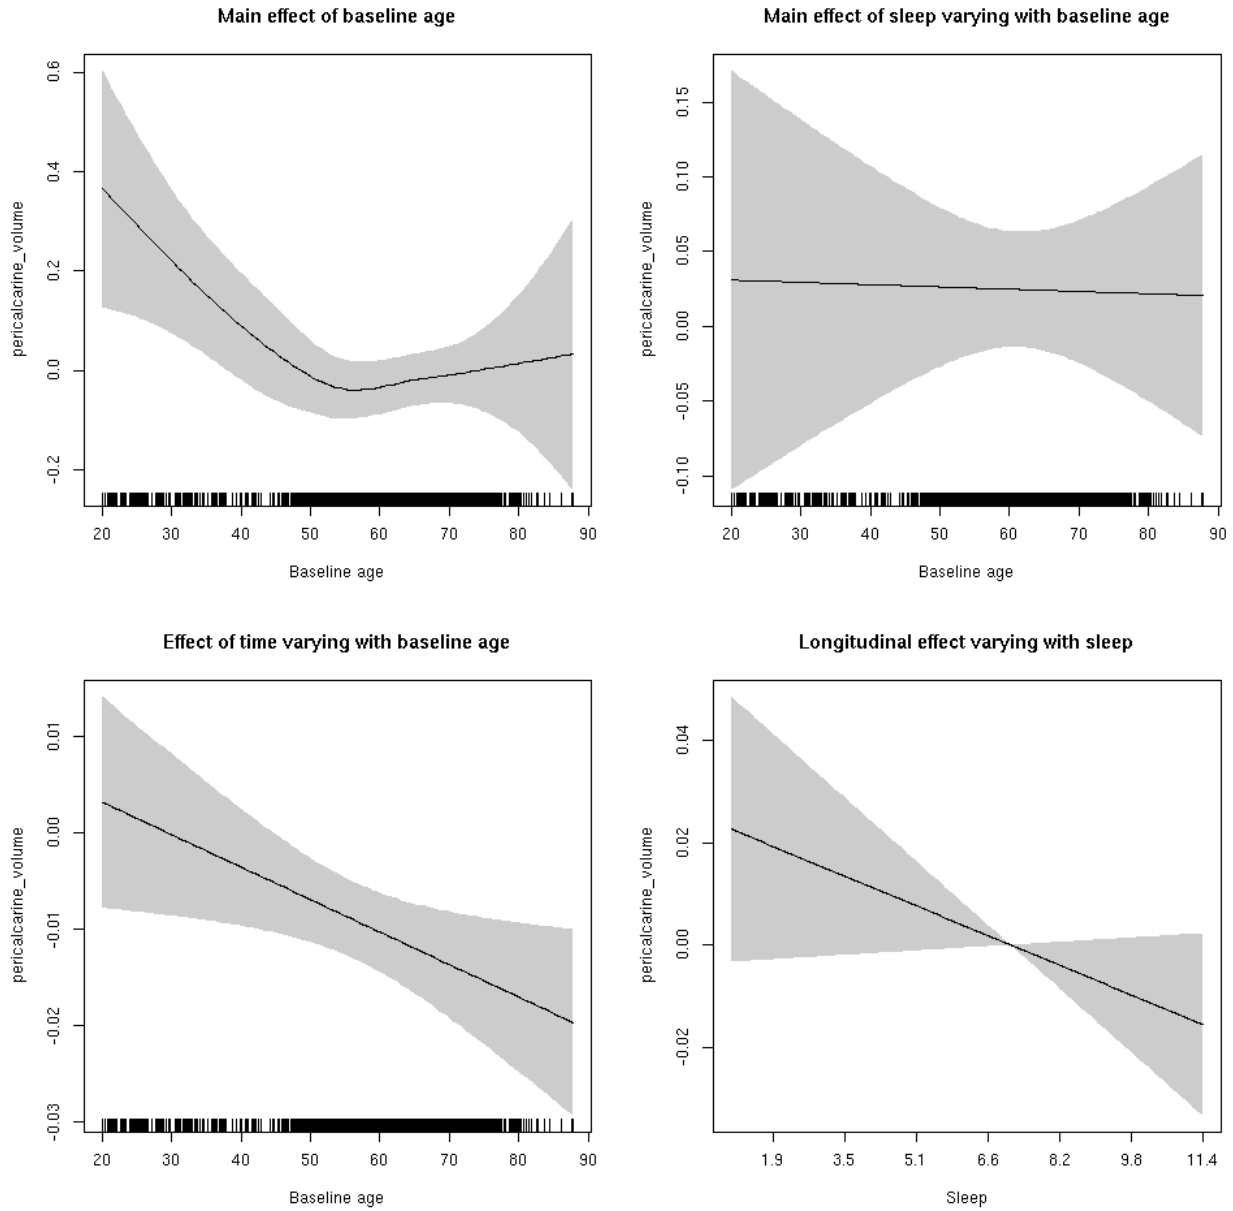

**Male: Full data** Below is the row for `s(sleep_z):time` from the model output.

```
## s(sleep_z):time  1.000  1.000  2.745  0.09765 .
```

Below are plots of a plot of `s(bl_age)`, `s(bl_age):sleep_z`, `s(bl_age):time`, and `s(sleep_z):time`. For `s(sleep_z):time`, roughly, if we cannot fit a straight line through the confidence bands, there is evidence that the effect of time depends on sleep duration. It is correct that the confidence interval is zero at one point along the axis; this happens because we do not include the main effect.

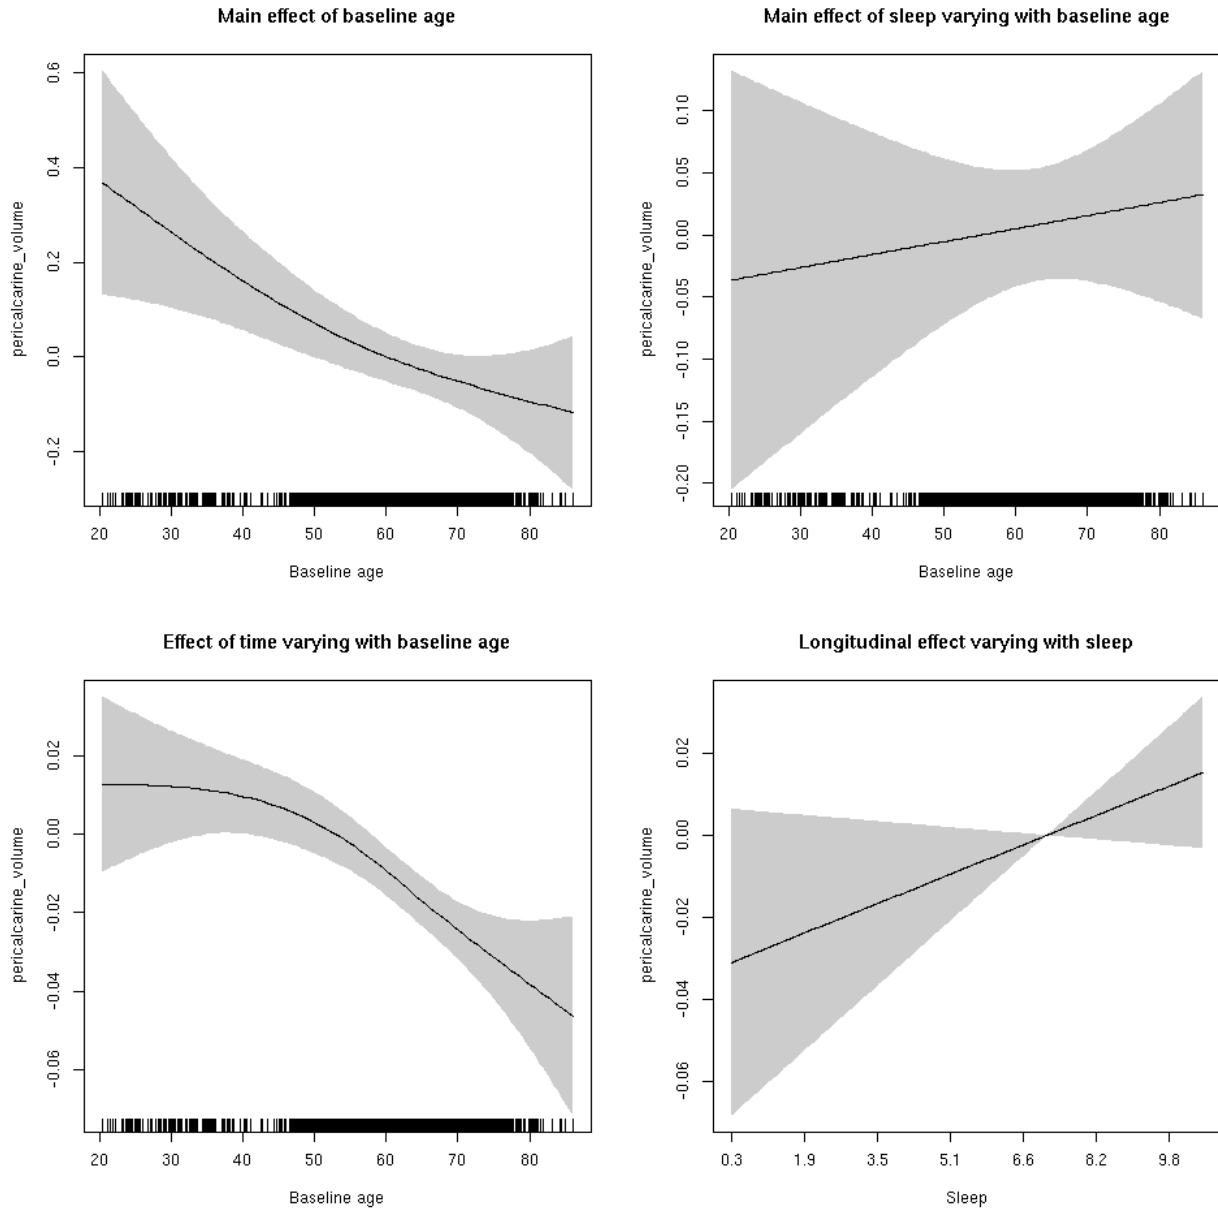

## pericalcarine\_volume

**Full data** Below is the model output. The term `s(sleep_z):time` is probably what we care most about.

```
##
## Family: gaussian
## Link function: identity
##
## Formula:
## value ~ sex + site + icv + s(bl_age, k = 10, bs = "cr") + s(bl_age,
##   by = sleep_z, bs = "cr") + +s(bl_age, by = time, k = 5, bs = "cr") +
##   s(sleep_z, by = time, k = 5, bs = "cr", pc = 0)
## <environment: 0x5630035adb90>
```

```

##
## Parametric coefficients:
##           Estimate Std. Error t value Pr(>|t|)
## (Intercept)  0.28404   0.06734   4.218 2.49e-05 ***
## sexmale      0.19690   0.03464   5.684 1.36e-08 ***
## siteousAvanto -0.75631   0.08222  -9.199 < 2e-16 ***
## siteousPrisma -0.19904   0.17802  -1.118  0.264
## siteousSkyra  0.36215   0.07959   4.550 5.44e-06 ***
## siteUB       -0.06300   0.15549  -0.405  0.685
## siteUCAM     -0.60946   0.08341  -7.307 3.00e-13 ***
## siteUKB      -0.38772   0.06380  -6.077 1.28e-09 ***
## siteUmU      -0.08121   0.09625  -0.844  0.399
## icv          0.26518   0.01700  15.598 < 2e-16 ***
## ---
## Signif. codes:  0 '***' 0.001 '**' 0.01 '*' 0.05 '.' 0.1 ' ' 1
##
## Approximate significance of smooth terms:
##           edf Ref.df   F  p-value
## s(bl_age)      2.449  2.449  9.175 4.22e-05 ***
## s(bl_age):sleep_z 2.000  2.000  0.607  0.545
## s(bl_age):time  2.000  2.000 32.432 < 2e-16 ***
## s(sleep_z):time  1.000  1.000  0.027  0.869
## ---
## Signif. codes:  0 '***' 0.001 '**' 0.01 '*' 0.05 '.' 0.1 ' ' 1
##
## R-sq.(adj) =  0.17
## lmer.REML = 11528  Scale est. = 0.041593  n = 8172

```

Below are plots of a plot of  $s(\text{bl\_age})$ ,  $s(\text{bl\_age}):\text{sleep\_z}$ ,  $s(\text{bl\_age}):\text{time}$ , and  $s(\text{sleep\_z}):\text{time}$ . For  $s(\text{sleep\_z}):\text{time}$ , roughly, if we cannot fit a straight line through the confidence bands, there is evidence that the effect of time depends on sleep duration. It is correct that the confidence interval is zero at one point along the axis; this happens because we do not include the main effect.

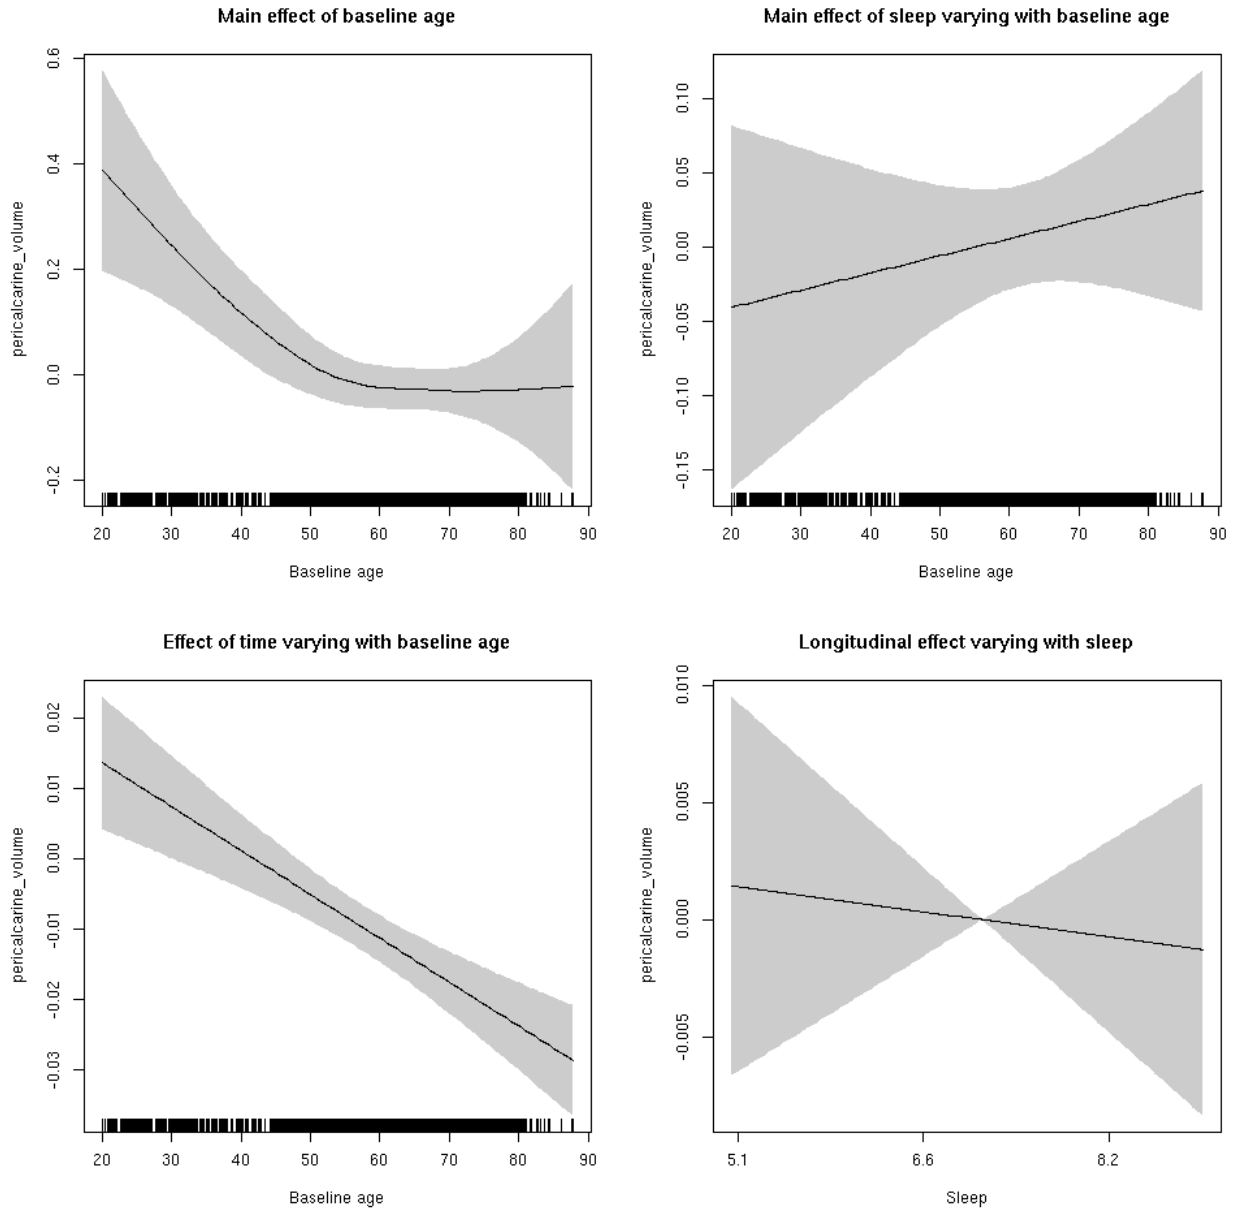

**Restricted to sleep  $\geq 5$  and  $\leq 9$  hours** Below is the row for `s(sleep_z):time` from the model output.

```
## s(sleep_z):time 1.000 1.000 0.126 0.722154
```

Below are plots of a plot of `s(bl_age)`, `s(bl_age):sleep_z`, `s(bl_age):time`, and `s(sleep_z):time`. For `s(sleep_z):time`, roughly, if we cannot fit a straight line through the confidence bands, there is evidence that the effect of time depends on sleep duration. It is correct that the confidence interval is zero at one point along the axis; this happens because we do not include the main effect.



### postcentral\_area: Stratified by sex

**Female: Full data** Below is the row for `s(sleep_z):time` from the model output.

```
## s(sleep_z):time  1.000  1.000  0.012  0.9124
```

Below are plots of a plot of `s(bl_age)`, `s(bl_age):sleep_z`, `s(bl_age):time`, and `s(sleep_z):time`. For `s(sleep_z):time`, roughly, if we cannot fit a straight line through the confidence bands, there is evidence that the effect of time depends on sleep duration. It is correct that the confidence interval is zero at one point along the axis; this happens because we do not include the main effect.

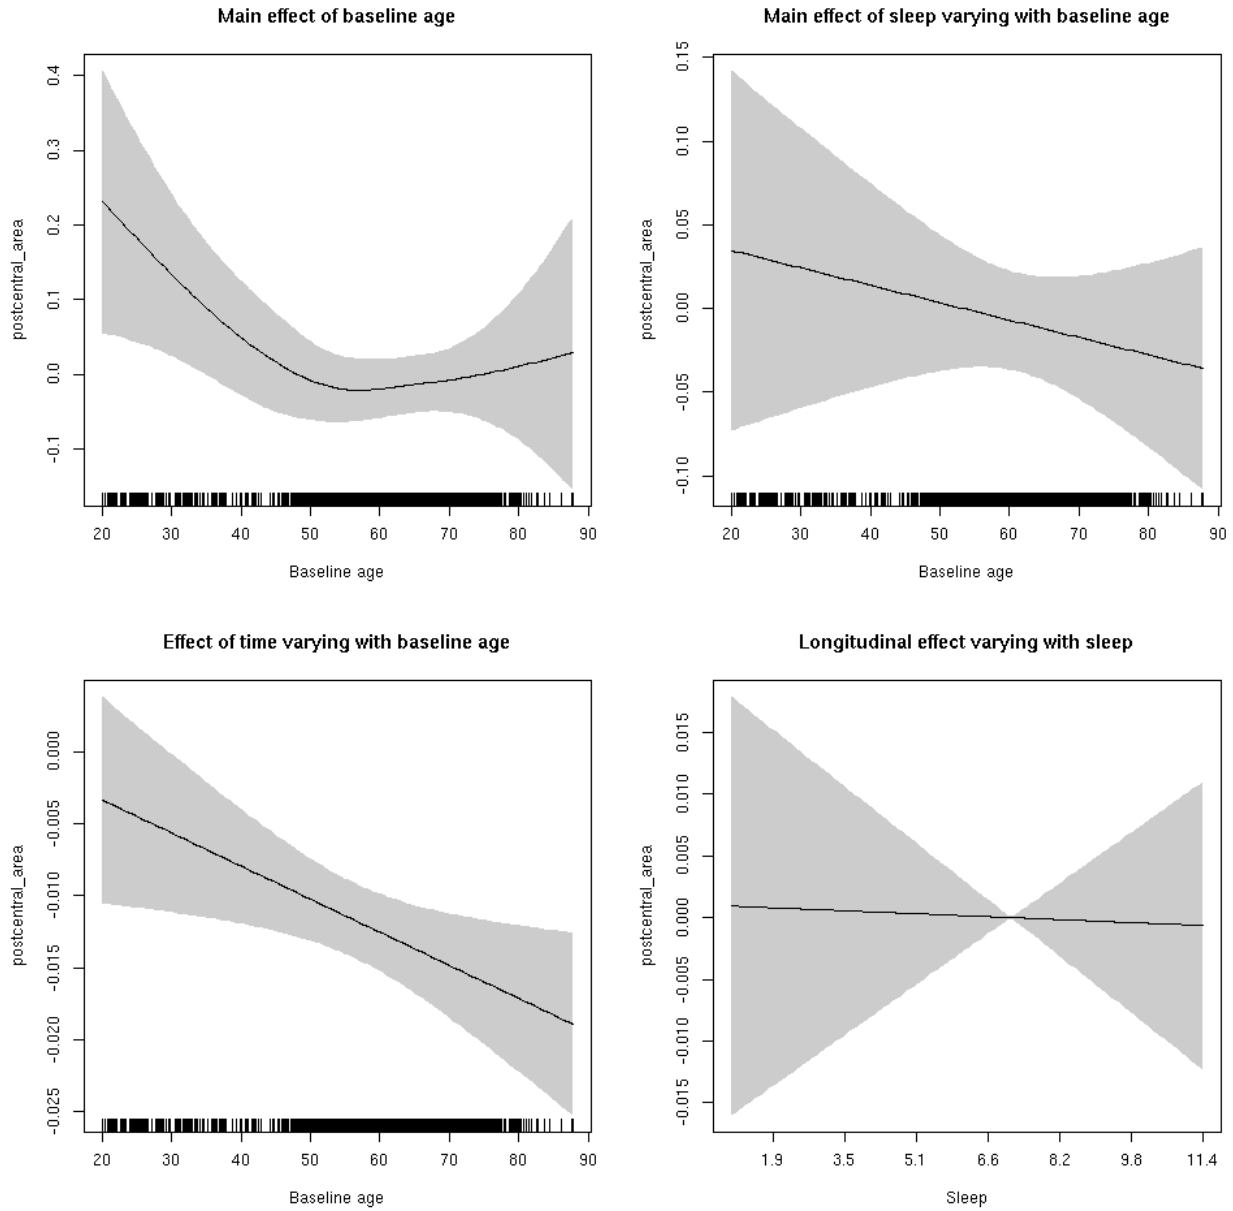

**Male: Full data** Below is the row for `s(sleep_z):time` from the model output.

```
## s(sleep_z):time  1.000  1.000  3.466  0.0627 .
```

Below are plots of a plot of `s(bl_age)`, `s(bl_age):sleep_z`, `s(bl_age):time`, and `s(sleep_z):time`. For `s(sleep_z):time`, roughly, if we cannot fit a straight line through the confidence bands, there is evidence that the effect of time depends on sleep duration. It is correct that the confidence interval is zero at one point along the axis; this happens because we do not include the main effect.



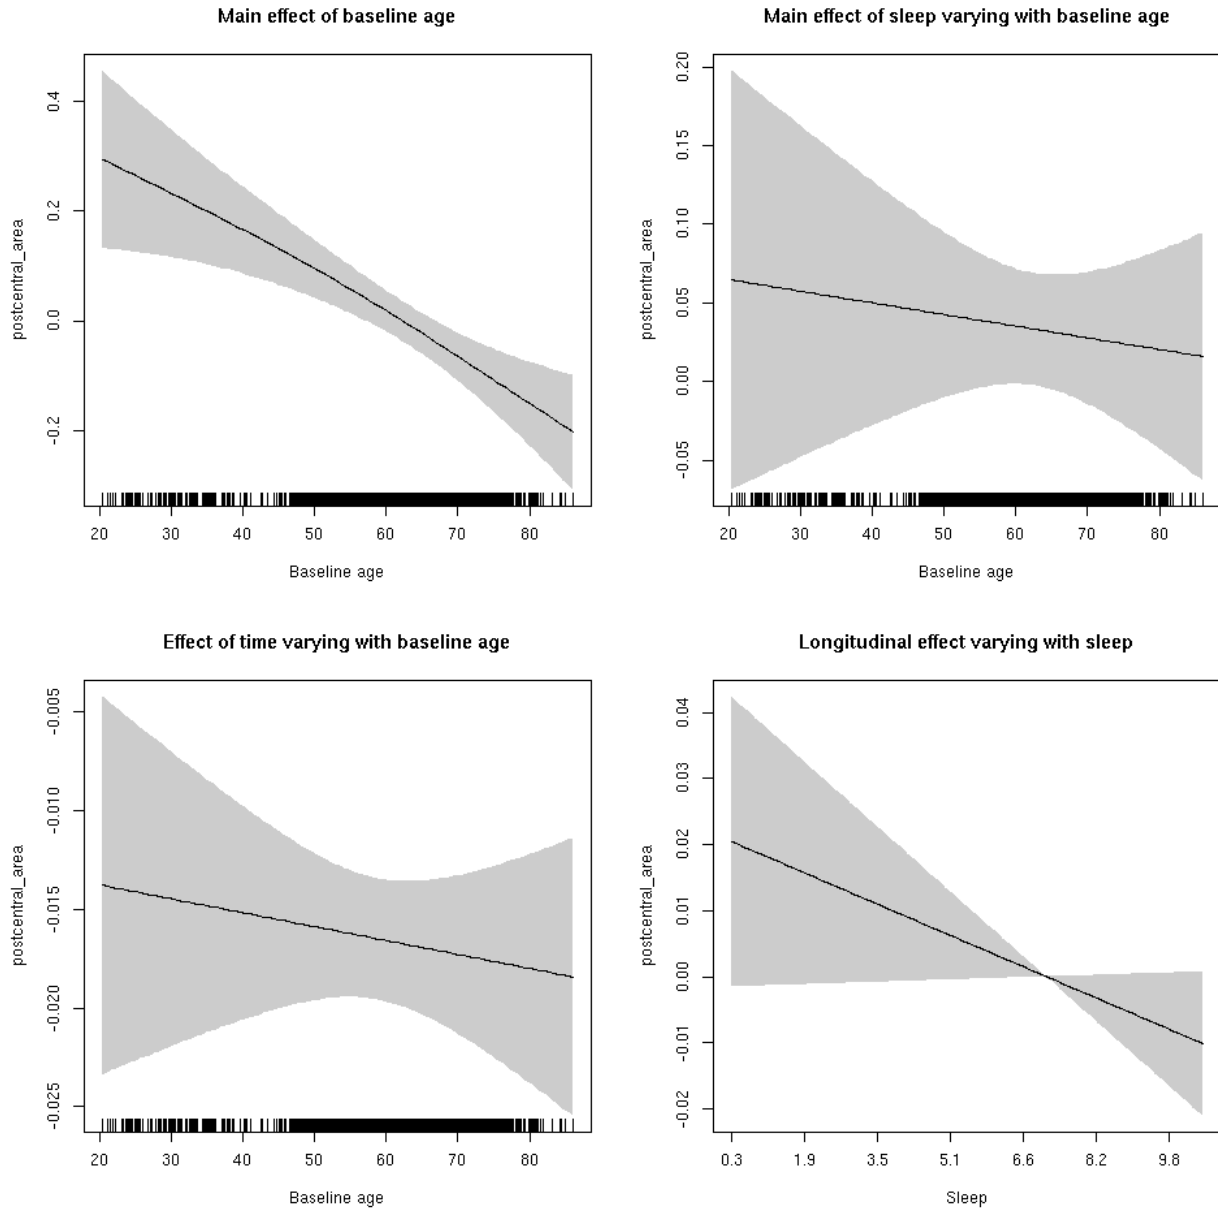

## postcentral\_area

**Full data** Below is the model output. The term `s(sleep_z):time` is probably what we care most about.

```
##
## Family: gaussian
## Link function: identity
##
## Formula:
## value ~ sex + site + icv + s(bl_age, k = 10, bs = "cr") + s(bl_age,
##   by = sleep_z, bs = "cr") + +s(bl_age, by = time, k = 5, bs = "cr") +
##   s(sleep_z, by = time, k = 5, bs = "cr", pc = 0)
## <environment: 0x5630035ad7d8>
```

```

##
## Parametric coefficients:
##           Estimate Std. Error t value Pr(>|t|)
## (Intercept)  0.65821    0.05200  12.658 < 2e-16 ***
## sexmale      0.21797    0.02703   8.063 8.54e-16 ***
## siteousAvanto -0.80195    0.06399 -12.533 < 2e-16 ***
## siteousPrisma -0.78346    0.11710  -6.691 2.37e-11 ***
## siteousSkyra  -0.58478    0.06202  -9.429 < 2e-16 ***
## siteUB        -0.72209    0.12163  -5.937 3.03e-09 ***
## siteUCAM      -0.68876    0.06493 -10.608 < 2e-16 ***
## siteUKB       -0.74537    0.04852 -15.362 < 2e-16 ***
## siteUmU       0.07430    0.07491   0.992  0.321
## icv           0.64144    0.01317  48.722 < 2e-16 ***
## ---
## Signif. codes:  0 '***' 0.001 '**' 0.01 '*' 0.05 '.' 0.1 ' ' 1
##
## Approximate significance of smooth terms:
##           edf Ref.df      F p-value
## s(bl_age)      1      1 20.873 5.1e-06 ***
## s(bl_age):sleep_z  2      2  0.996  0.369
## s(bl_age):time    2      2 101.126 < 2e-16 ***
## s(sleep_z):time   1      1  1.908  0.167
## ---
## Signif. codes:  0 '***' 0.001 '**' 0.01 '*' 0.05 '.' 0.1 ' ' 1
##
## R-sq.(adj) =  0.518
## lmer.REML =  5458  Scale est. = 0.015719  n = 8144

```

Below are plots of a plot of  $s(\text{bl\_age})$ ,  $s(\text{bl\_age}):\text{sleep\_z}$ ,  $s(\text{bl\_age}):\text{time}$ , and  $s(\text{sleep\_z}):\text{time}$ . For  $s(\text{sleep\_z}):\text{time}$ , roughly, if we cannot fit a straight line through the confidence bands, there is evidence that the effect of time depends on sleep duration. It is correct that the confidence interval is zero at one point along the axis; this happens because we do not include the main effect.

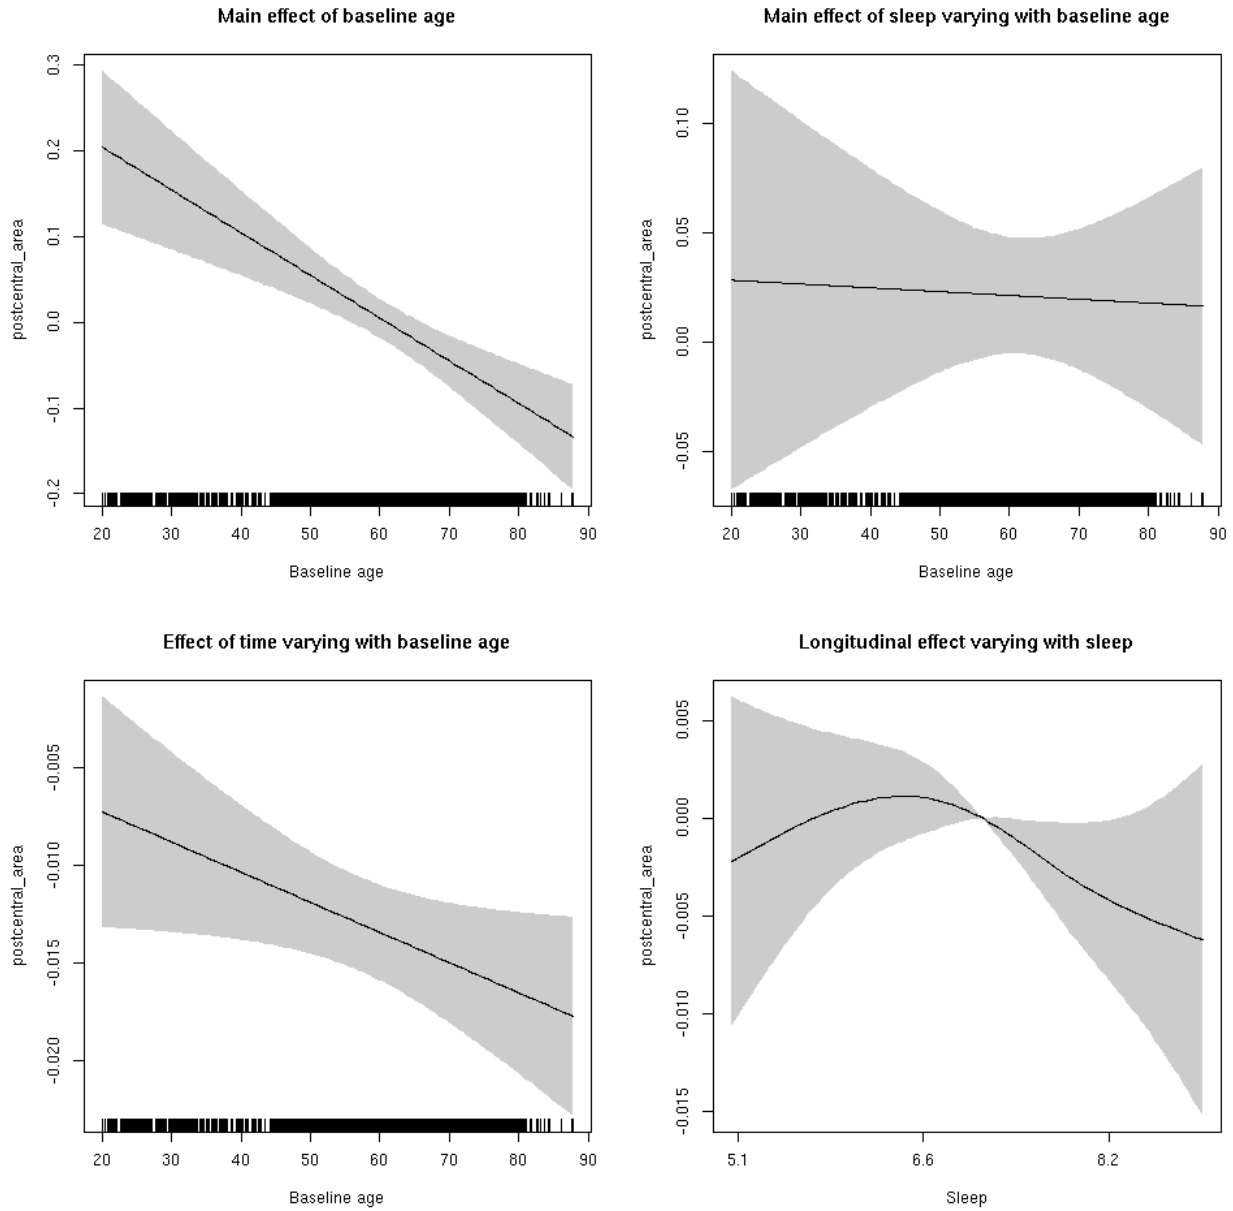

**Restricted to sleep  $\geq 5$  and  $\leq 9$  hours** Below is the row for `s(sleep_z):time` from the model output.

```
## s(sleep_z):time  2.007  2.007  2.265   0.115
```

Below are plots of a plot of `s(bl_age)`, `s(bl_age):sleep_z`, `s(bl_age):time`, and `s(sleep_z):time`. For `s(sleep_z):time`, roughly, if we cannot fit a straight line through the confidence bands, there is evidence that the effect of time depends on sleep duration. It is correct that the confidence interval is zero at one point along the axis; this happens because we do not include the main effect.



## postcentral\_thickness: Stratified by sex

**Female: Full data** Below is the row for `s(sleep_z):time` from the model output.

```
## s(sleep_z):time  1.000  1.000  0.585  0.445
```

Below are plots of a plot of `s(bl_age)`, `s(bl_age):sleep_z`, `s(bl_age):time`, and `s(sleep_z):time`. For `s(sleep_z):time`, roughly, if we cannot fit a straight line through the confidence bands, there is evidence that the effect of time depends on sleep duration. It is correct that the confidence interval is zero at one point along the axis; this happens because we do not include the main effect.

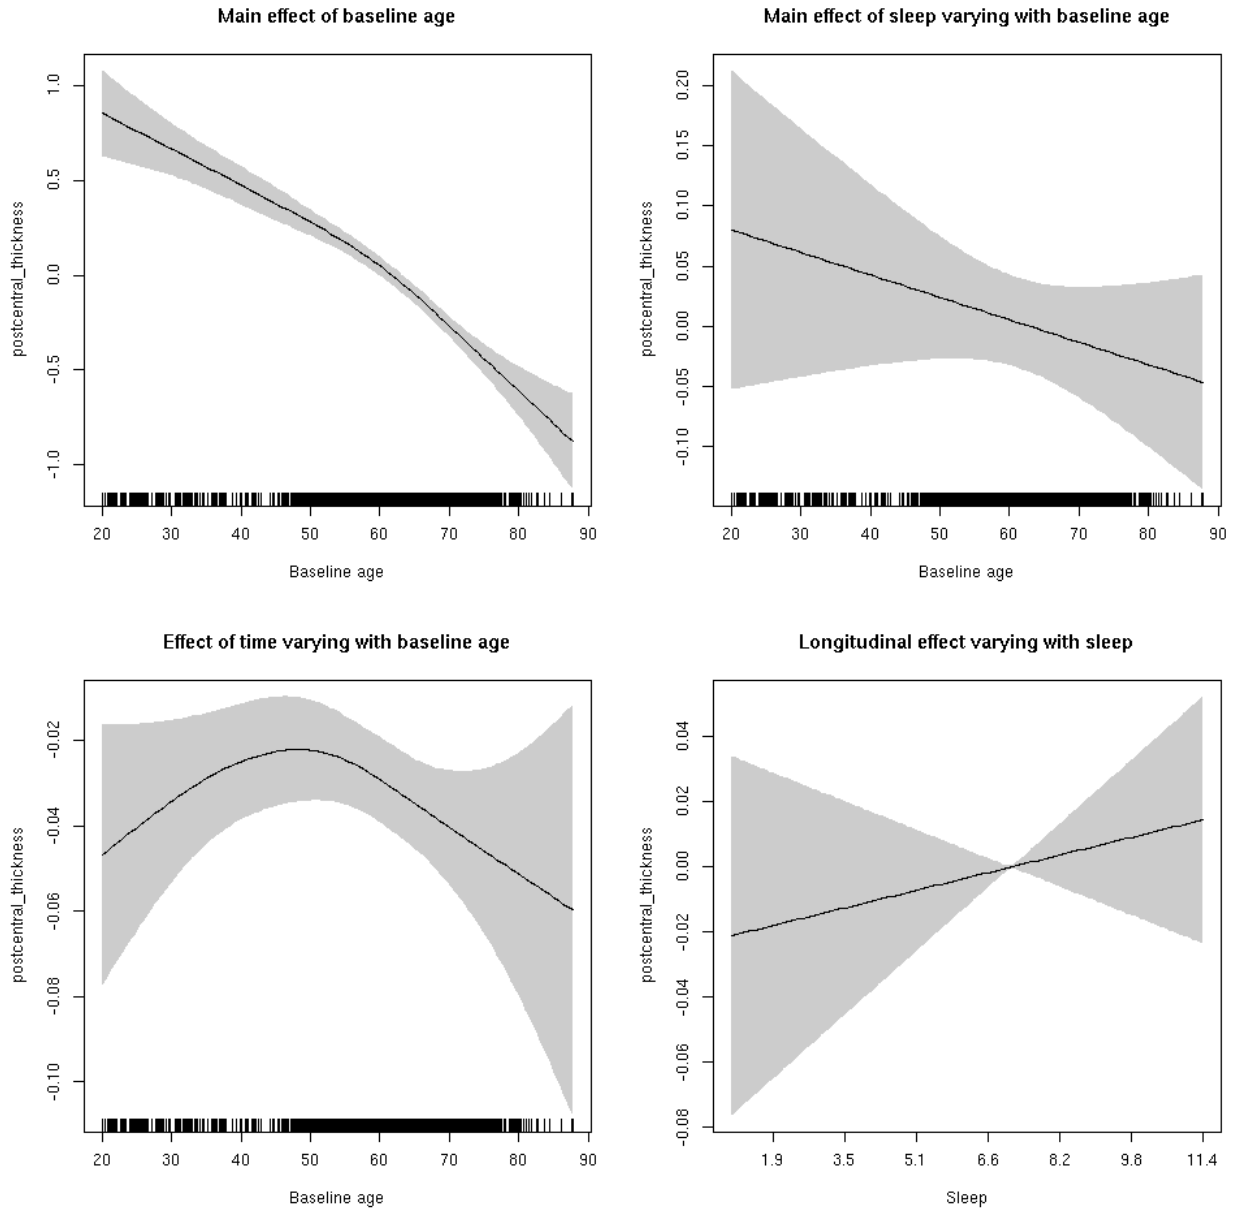

**Male: Full data** Below is the row for `s(sleep_z):time` from the model output.

```
## s(sleep_z):time  1.000  1.000  0.149  0.699
```

Below are plots of a plot of `s(bl_age)`, `s(bl_age):sleep_z`, `s(bl_age):time`, and `s(sleep_z):time`. For `s(sleep_z):time`, roughly, if we cannot fit a straight line through the confidence bands, there is evidence that the effect of time depends on sleep duration. It is correct that the confidence interval is zero at one point along the axis; this happens because we do not include the main effect.

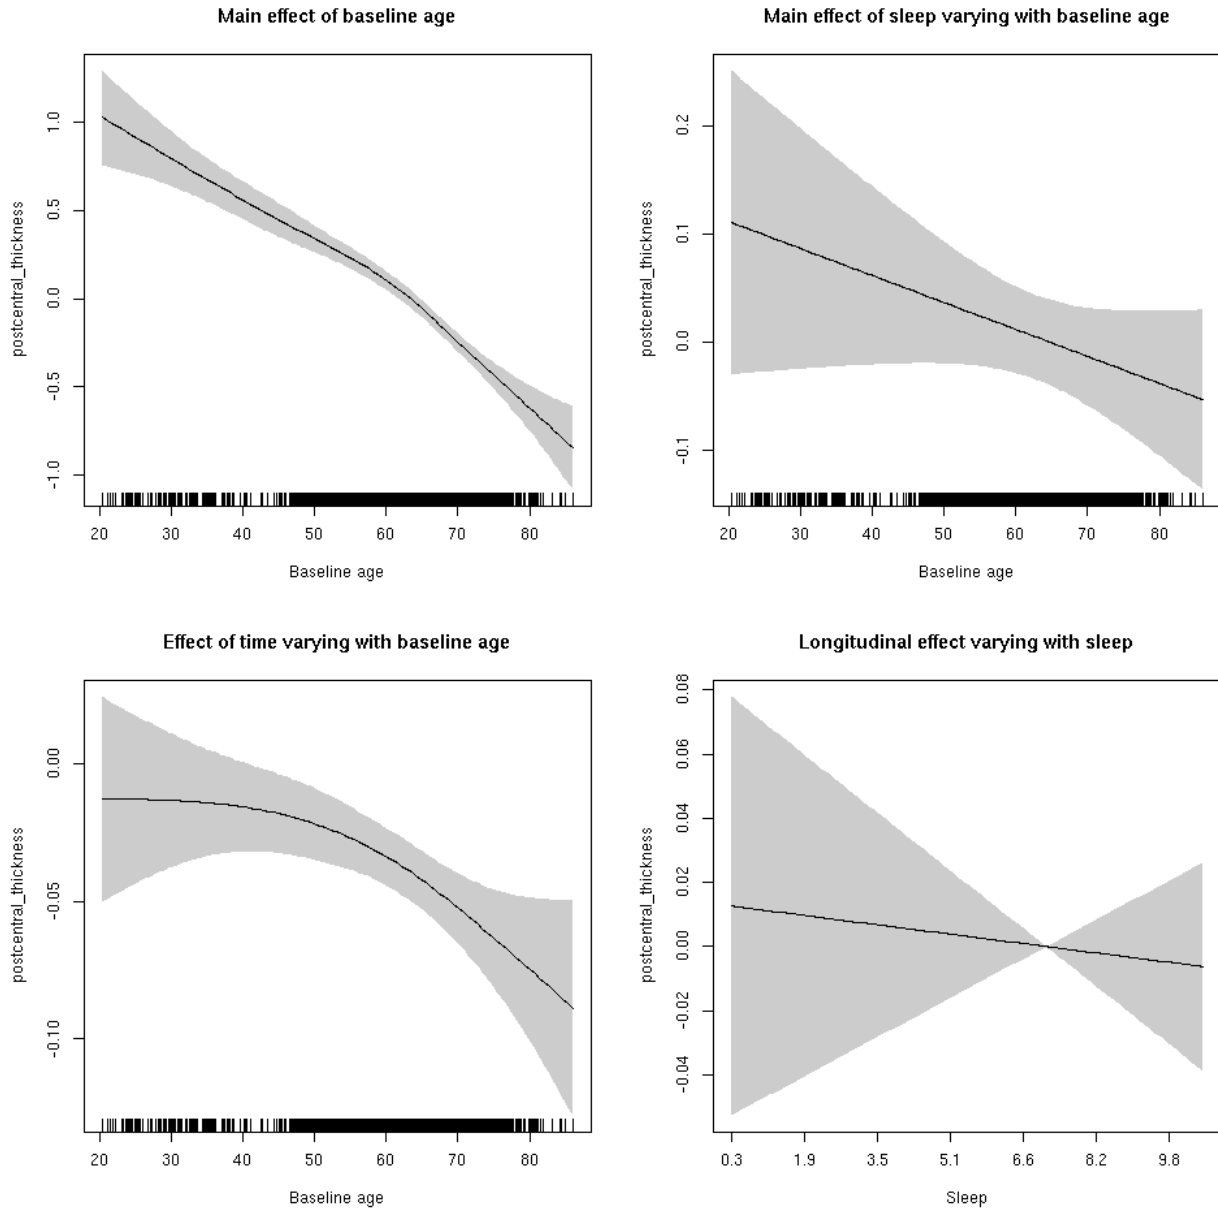

## postcentral\_thickness

**Full data** Below is the model output. The term `s(sleep_z):time` is probably what we care most about.

```
##
## Family: gaussian
## Link function: identity
##
## Formula:
## value ~ sex + site + s(bl_age, k = 10, bs = "cr") + s(bl_age,
##   by = sleep_z, bs = "cr") + +s(bl_age, by = time, k = 5, bs = "cr") +
##   s(sleep_z, by = time, k = 5, bs = "cr", pc = 0)
## <environment: 0x5630035da070>
```

```

##
## Parametric coefficients:
##           Estimate Std. Error t value Pr(>|t|)
## (Intercept) -1.24775    0.05076 -24.581 < 2e-16 ***
## sexmale     -0.10689    0.02545  -4.200 2.70e-05 ***
## siteousAvanto -0.04822    0.06764  -0.713 0.47600
## siteousPrisma 0.68287    0.30023   2.274 0.02296 *
## siteousSkyra 0.21528    0.06760   3.184 0.00146 **
## siteUB       0.74864    0.13453   5.565 2.71e-08 ***
## siteUCAM     0.52603    0.06979   7.537 5.32e-14 ***
## siteUKB      1.51986    0.05141  29.565 < 2e-16 ***
## siteUmU      0.35430    0.08371   4.233 2.33e-05 ***
## ---
## Signif. codes:  0 '***' 0.001 '**' 0.01 '*' 0.05 '.' 0.1 ' ' 1
##
## Approximate significance of smooth terms:
##           edf Ref.df      F p-value
## s(bl_age)      3.440  3.440 150.165 <2e-16 ***
## s(bl_age):sleep_z 2.000  2.000   2.067  0.127
## s(bl_age):time  3.218  3.218  43.800 <2e-16 ***
## s(sleep_z):time  1.000  1.000   0.109  0.741
## ---
## Signif. codes:  0 '***' 0.001 '**' 0.01 '*' 0.05 '.' 0.1 ' ' 1
##
## R-sq.(adj) =  0.389
## lmer.REML = 16241  Scale est. = 0.15668  n = 8176

```

Below are plots of a plot of `s(bl_age)`, `s(bl_age):sleep_z`, `s(bl_age):time`, and `s(sleep_z):time`. For `s(sleep_z):time`, roughly, if we cannot fit a straight line through the confidence bands, there is evidence that the effect of time depends on sleep duration. It is correct that the confidence interval is zero at one point along the axis; this happens because we do not include the main effect.

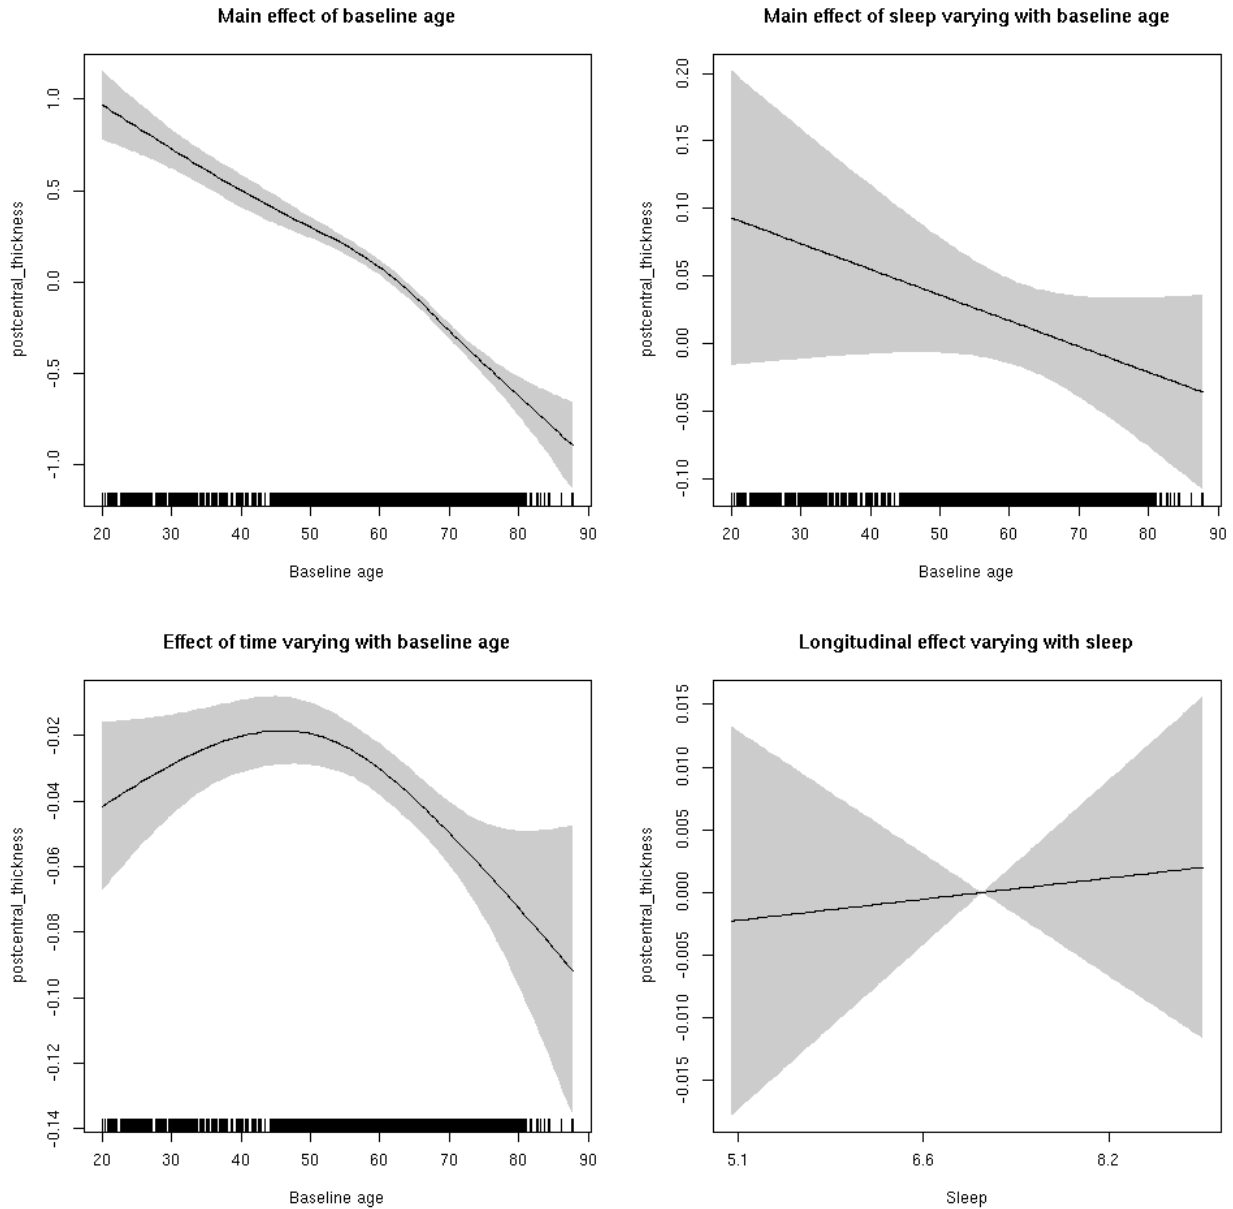

**Restricted to sleep  $\geq 5$  and  $\leq 9$  hours** Below is the row for `s(sleep_z):time` from the model output.

```
## s(sleep_z):time 1.000 1.000 0.086 0.769
```

Below are plots of a plot of `s(bl_age)`, `s(bl_age):sleep_z`, `s(bl_age):time`, and `s(sleep_z):time`. For `s(sleep_z):time`, roughly, if we cannot fit a straight line through the confidence bands, there is evidence that the effect of time depends on sleep duration. It is correct that the confidence interval is zero at one point along the axis; this happens because we do not include the main effect.



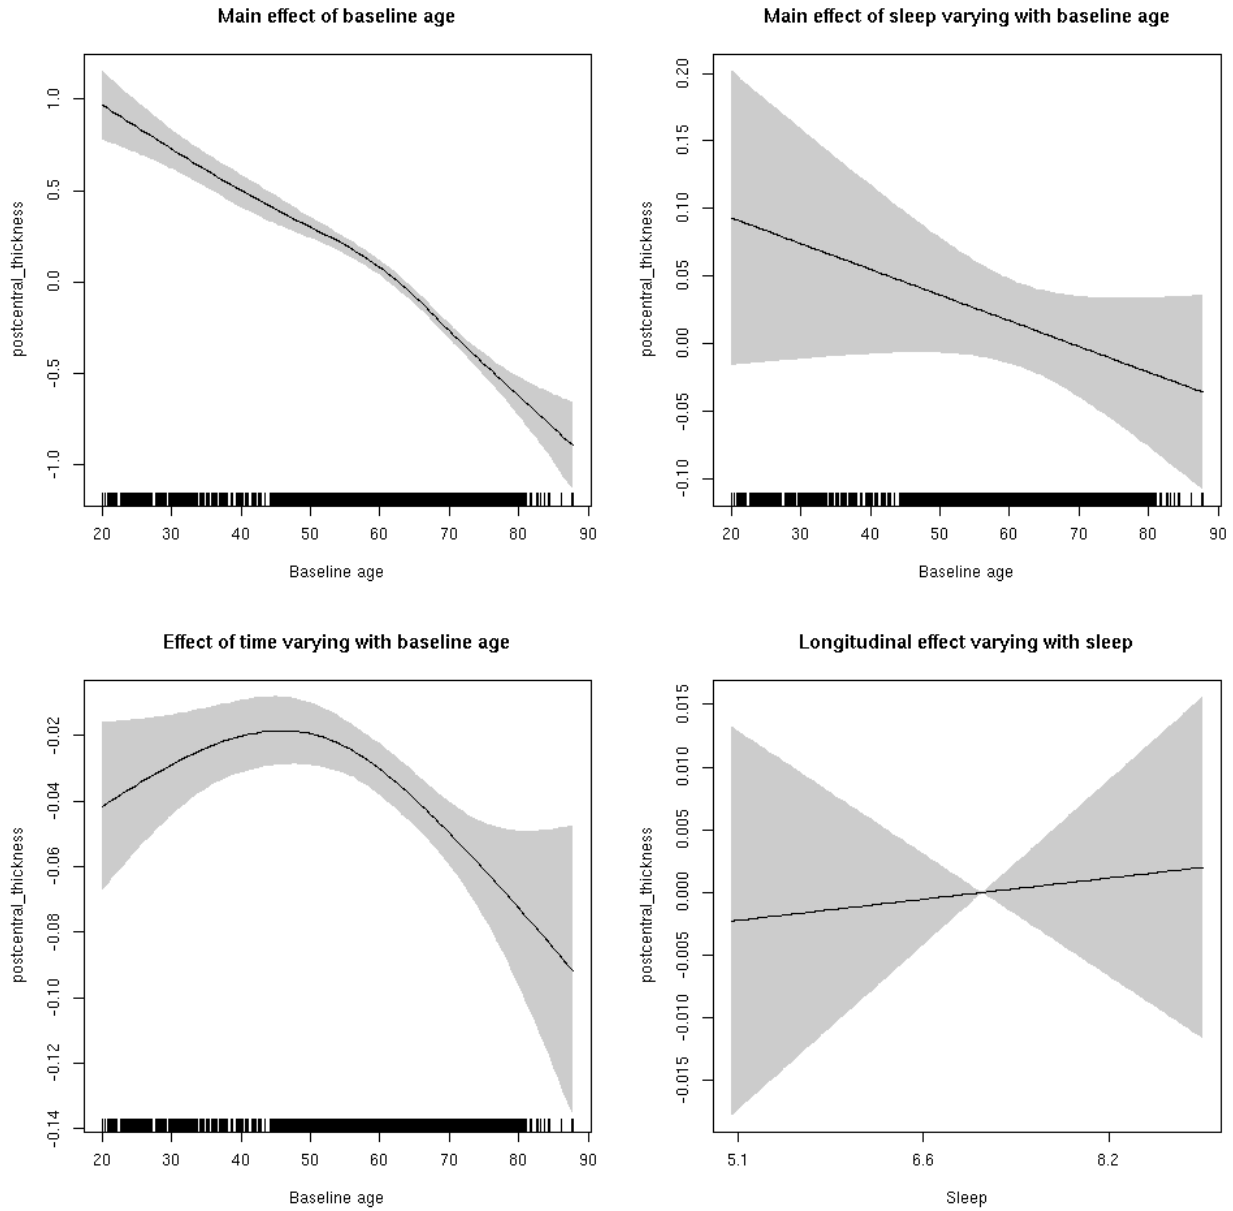

## postcentral\_volume: Stratified by sex

**Female: Full data** Below is the row for `s(sleep_z):time` from the model output.

```
## s(sleep_z):time  1.000  1.000  0.187  0.665
```

Below are plots of a plot of `s(bl_age)`, `s(bl_age):sleep_z`, `s(bl_age):time`, and `s(sleep_z):time`. For `s(sleep_z):time`, roughly, if we cannot fit a straight line through the confidence bands, there is evidence that the effect of time depends on sleep duration. It is correct that the confidence interval is zero at one point along the axis; this happens because we do not include the main effect.

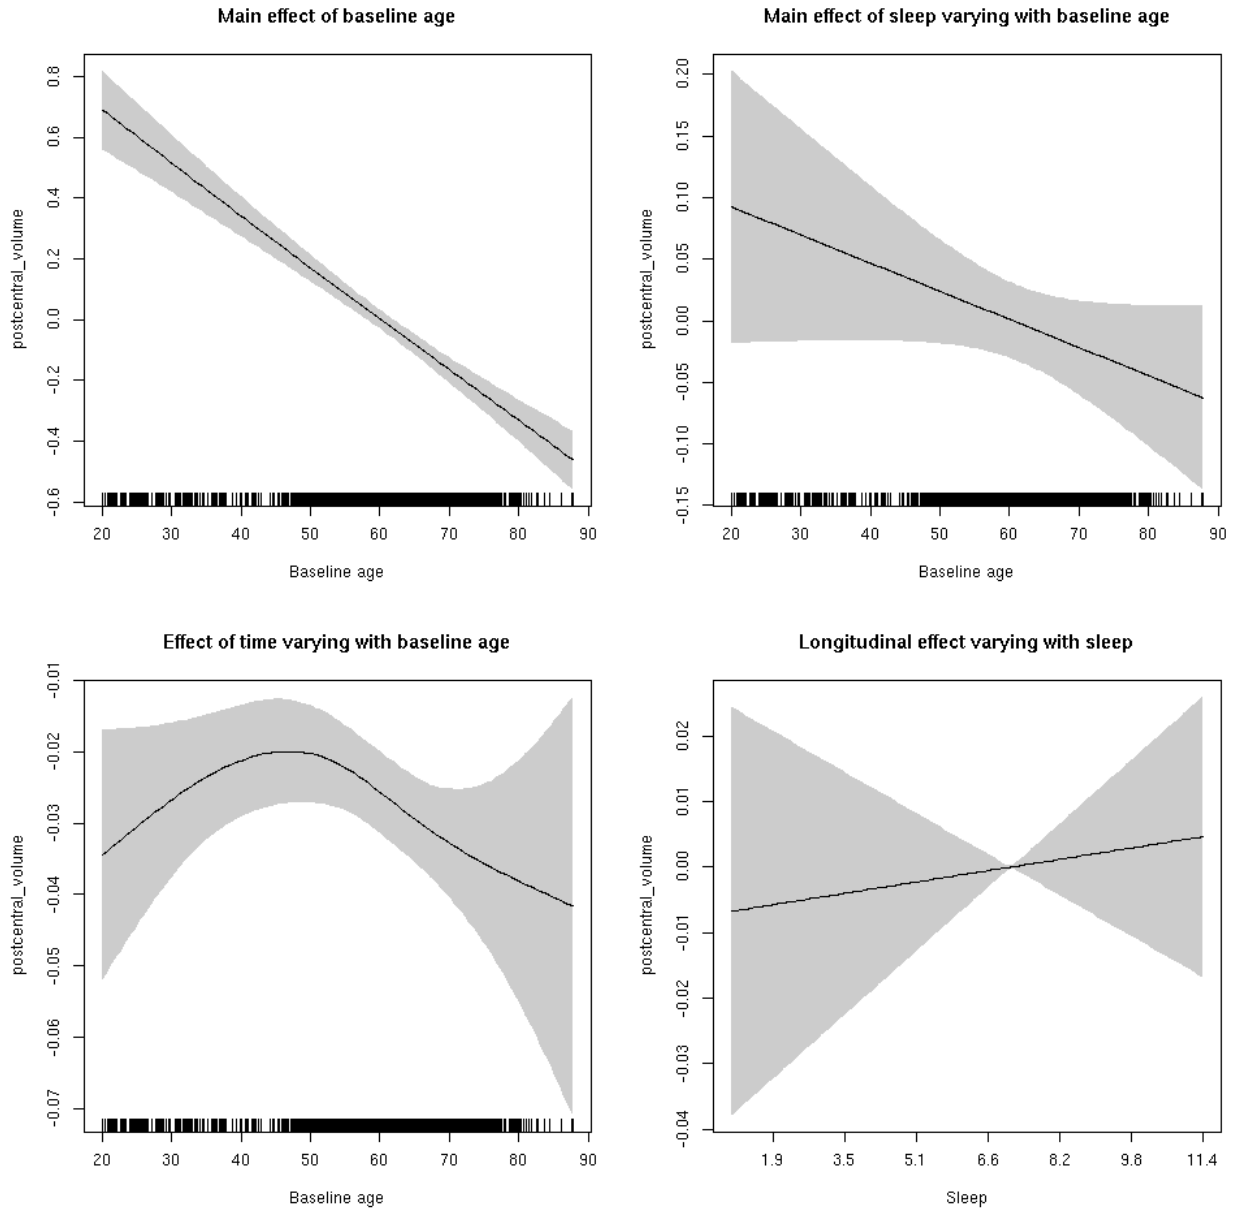

**Male: Full data** Below is the row for `s(sleep_z):time` from the model output.

```
## s(sleep_z):time  1.000  1.000  0.822  0.365
```

Below are plots of a plot of `s(bl_age)`, `s(bl_age):sleep_z`, `s(bl_age):time`, and `s(sleep_z):time`. For `s(sleep_z):time`, roughly, if we cannot fit a straight line through the confidence bands, there is evidence that the effect of time depends on sleep duration. It is correct that the confidence interval is zero at one point along the axis; this happens because we do not include the main effect.

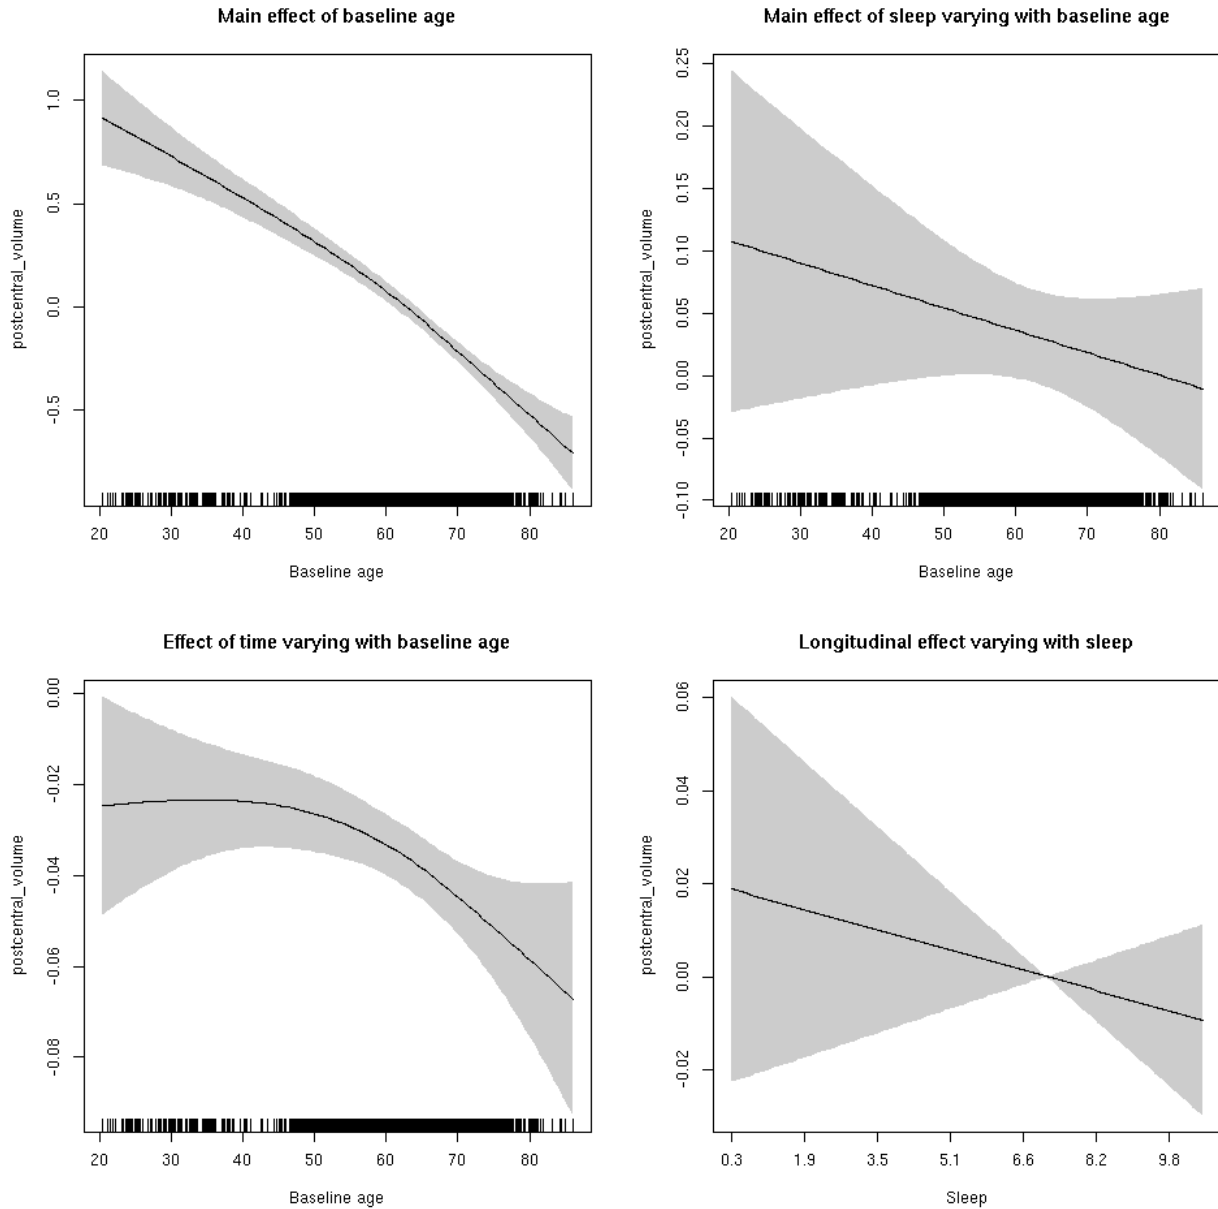

## postcentral\_volume

**Full data** Below is the model output. The term `s(sleep_z):time` is probably what we care most about.

```
##
## Family: gaussian
## Link function: identity
##
## Formula:
## value ~ sex + site + icv + s(bl_age, k = 10, bs = "cr") + s(bl_age,
##   by = sleep_z, bs = "cr") + +s(bl_age, by = time, k = 5, bs = "cr") +
##   s(sleep_z, by = time, k = 5, bs = "cr", pc = 0)
## <environment: 0x5630035ae3e0>
```

```

##
## Parametric coefficients:
##           Estimate Std. Error t value Pr(>|t|)
## (Intercept)  0.08657   0.05425   1.596  0.11060
## sexmale      0.02551   0.02816   0.906  0.36514
## siteousAvanto -0.94922  0.06716 -14.133 < 2e-16 ***
## siteousPrisma -0.49833  0.19084  -2.611  0.00904 **
## siteousSkyra  -0.44382  0.06495  -6.833  8.92e-12 ***
## siteUB       -0.20985  0.12555  -1.671  0.09469 .
## siteUCAM     -0.41012  0.06744  -6.081  1.25e-09 ***
## siteUKB      0.05017  0.05051   0.993  0.32060
## siteUmU      0.18534  0.07776   2.384  0.01717 *
## icv          0.60402  0.01391  43.422 < 2e-16 ***
## ---
## Signif. codes:  0 '***' 0.001 '**' 0.01 '*' 0.05 '.' 0.1 ' ' 1
##
## Approximate significance of smooth terms:
##           edf Ref.df      F p-value
## s(bl_age)      1.000  1.000 371.001 <2e-16 ***
## s(bl_age):sleep_z 2.000  2.000   2.722  0.0658 .
## s(bl_age):time  3.291  3.291  90.770 <2e-16 ***
## s(sleep_z):time  1.000  1.000   0.105  0.7460
## ---
## Signif. codes:  0 '***' 0.001 '**' 0.01 '*' 0.05 '.' 0.1 ' ' 1
##
## R-sq.(adj) =  0.481
## lmer.REML = 11085  Scale est. = 0.054832  n = 8176

```

Below are plots of a plot of `s(bl_age)`, `s(bl_age):sleep_z`, `s(bl_age):time`, and `s(sleep_z):time`. For `s(sleep_z):time`, roughly, if we cannot fit a straight line through the confidence bands, there is evidence that the effect of time depends on sleep duration. It is correct the that confidence interval is zero at one point along the axis; this happens because we do not include the main effect.

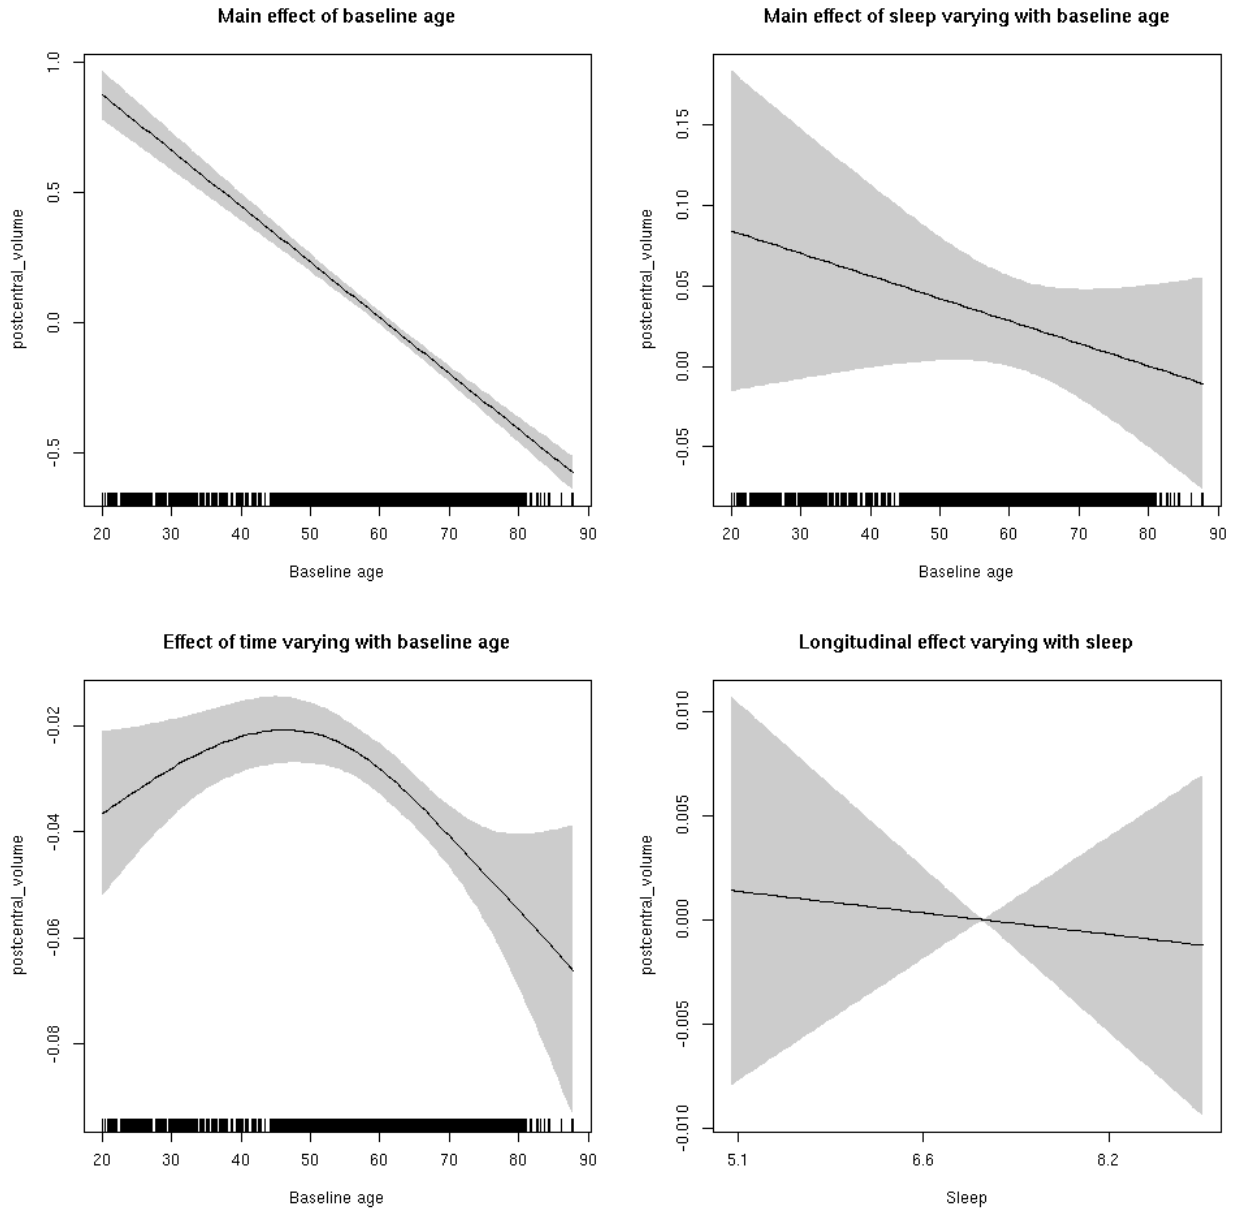

**Restricted to sleep  $\geq 5$  and  $\leq 9$  hours** Below is the row for `s(sleep_z):time` from the model output.

```
## s(sleep_z):time  1.000  1.000  0.090  0.7645
```

Below are plots of a plot of `s(bl_age)`, `s(bl_age):sleep_z`, `s(bl_age):time`, and `s(sleep_z):time`. For `s(sleep_z):time`, roughly, if we cannot fit a straight line through the confidence bands, there is evidence that the effect of time depends on sleep duration. It is correct that the confidence interval is zero at one point along the axis; this happens because we do not include the main effect.

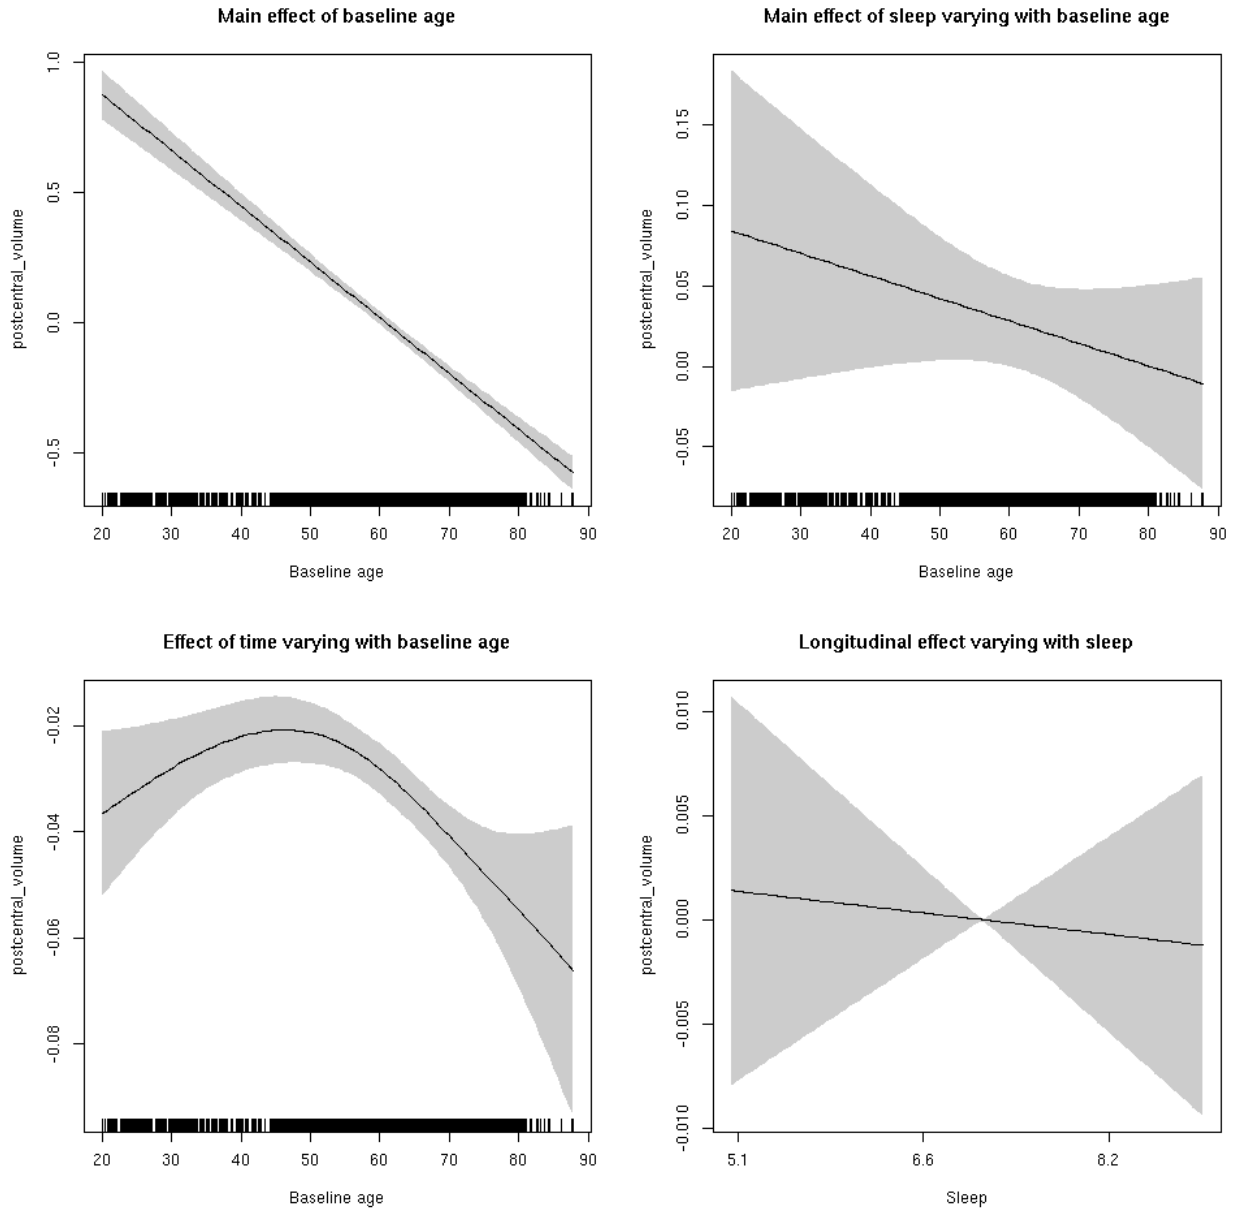

### posteriorcingulate\_area: Stratified by sex

**Female: Full data** Below is the row for `s(sleep_z):time` from the model output.

```
## s(sleep_z):time  1.000  1.000  0.378  0.538
```

Below are plots of a plot of `s(bl_age)`, `s(bl_age):sleep_z`, `s(bl_age):time`, and `s(sleep_z):time`. For `s(sleep_z):time`, roughly, if we cannot fit a straight line through the confidence bands, there is evidence that the effect of time depends on sleep duration. It is correct that the confidence interval is zero at one point along the axis; this happens because we do not include the main effect.

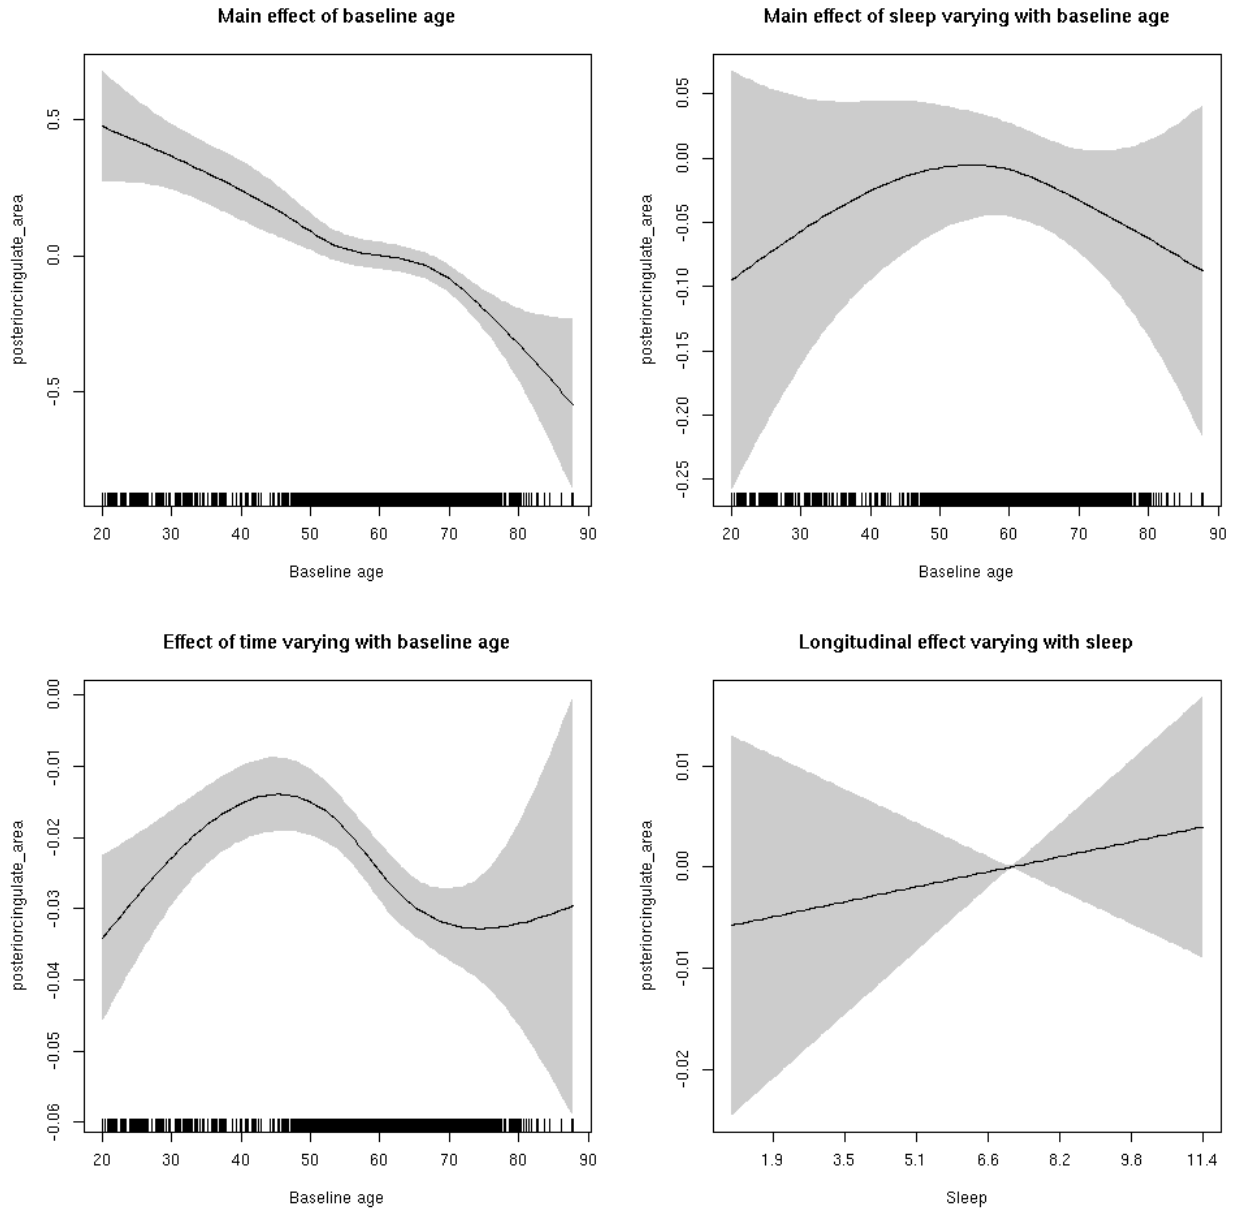

**Male: Full data** Below is the row for `s(sleep_z):time` from the model output.

```
## s(sleep_z):time  1.000  1.000  0.006  0.940
```

Below are plots of a plot of `s(bl_age)`, `s(bl_age):sleep_z`, `s(bl_age):time`, and `s(sleep_z):time`. For `s(sleep_z):time`, roughly, if we cannot fit a straight line through the confidence bands, there is evidence that the effect of time depends on sleep duration. It is correct that confidence interval is zero at one point along the axis; this happens because we do not include the main effect.

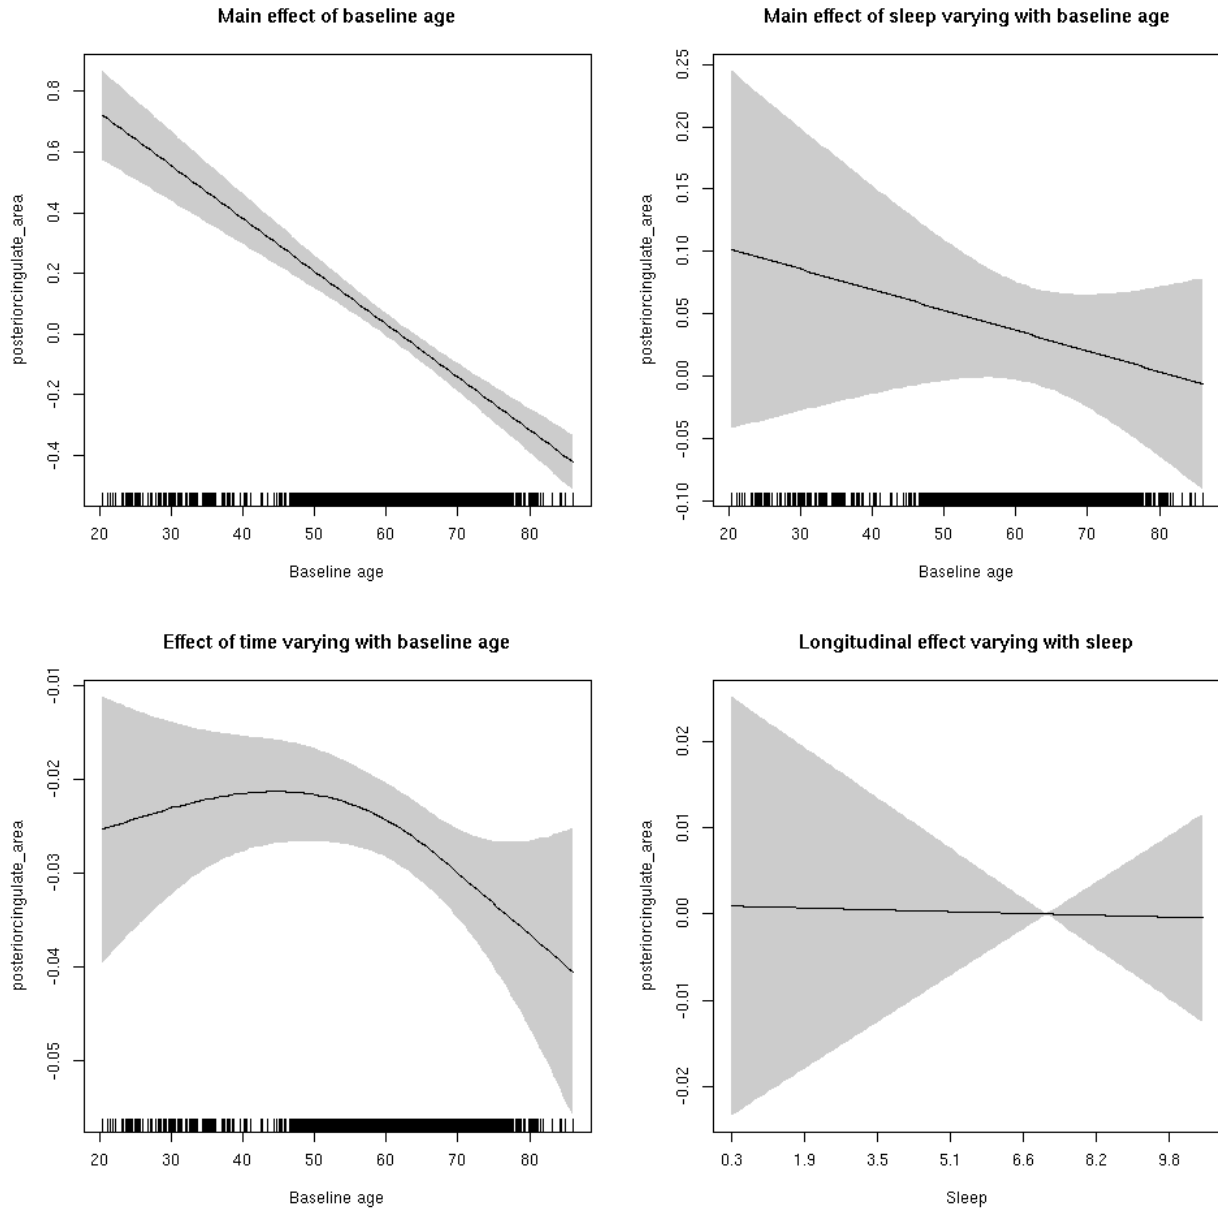

## posteriorcingulate\_area

**Full data** Below is the model output. The term `s(sleep_z):time` is probably what we care most about.

```
##
## Family: gaussian
## Link function: identity
##
## Formula:
## value ~ sex + site + icv + s(bl_age, k = 10, bs = "cr") + s(bl_age,
##   by = sleep_z, bs = "cr") + +s(bl_age, by = time, k = 5, bs = "cr") +
##   s(sleep_z, by = time, k = 5, bs = "cr", pc = 0)
## <environment: 0x5630035b3490>
```



```

##
## Parametric coefficients:
##           Estimate Std. Error t value Pr(>|t|)
## (Intercept)  1.16574    0.05585  20.872 < 2e-16 ***
## sexmale      0.09116    0.02864   3.184 0.00146 **
## siteousAvanto -0.93470    0.06790 -13.766 < 2e-16 ***
## siteousPrisma -0.65575    0.12748  -5.144 2.76e-07 ***
## siteousSkyra  -0.58272    0.06579  -8.857 < 2e-16 ***
## siteUB       -1.01103    0.12881  -7.849 4.72e-15 ***
## siteUCAM     -0.88418    0.06941 -12.738 < 2e-16 ***
## siteUKB      -1.20908    0.05315 -22.749 < 2e-16 ***
## siteUmU      -0.45663    0.07973  -5.727 1.06e-08 ***
## icv          0.61115    0.01401  43.629 < 2e-16 ***
## ---
## Signif. codes:  0 '***' 0.001 '**' 0.01 '*' 0.05 '.' 0.1 ' ' 1
##
## Approximate significance of smooth terms:
##           edf Ref.df      F p-value
## s(bl_age)      3.556  3.556 46.041 <2e-16 ***
## s(bl_age):sleep_z 2.006  2.006  0.409  0.662
## s(bl_age):time  3.611  3.611 152.331 <2e-16 ***
## s(sleep_z):time 1.000  1.000  0.168  0.682
## ---
## Signif. codes:  0 '***' 0.001 '**' 0.01 '*' 0.05 '.' 0.1 ' ' 1
##
## R-sq.(adj) =  0.475
## lmer.REML = 6709.1  Scale est. = 0.019082  n = 8155

```

Below are plots of a plot of  $s(\text{bl\_age})$ ,  $s(\text{bl\_age}):\text{sleep\_z}$ ,  $s(\text{bl\_age}):\text{time}$ , and  $s(\text{sleep\_z}):\text{time}$ . For  $s(\text{sleep\_z}):\text{time}$ , roughly, if we cannot fit a straight line through the confidence bands, there is evidence that the effect of time depends on sleep duration. It is correct that the confidence interval is zero at one point along the axis; this happens because we do not include the main effect.

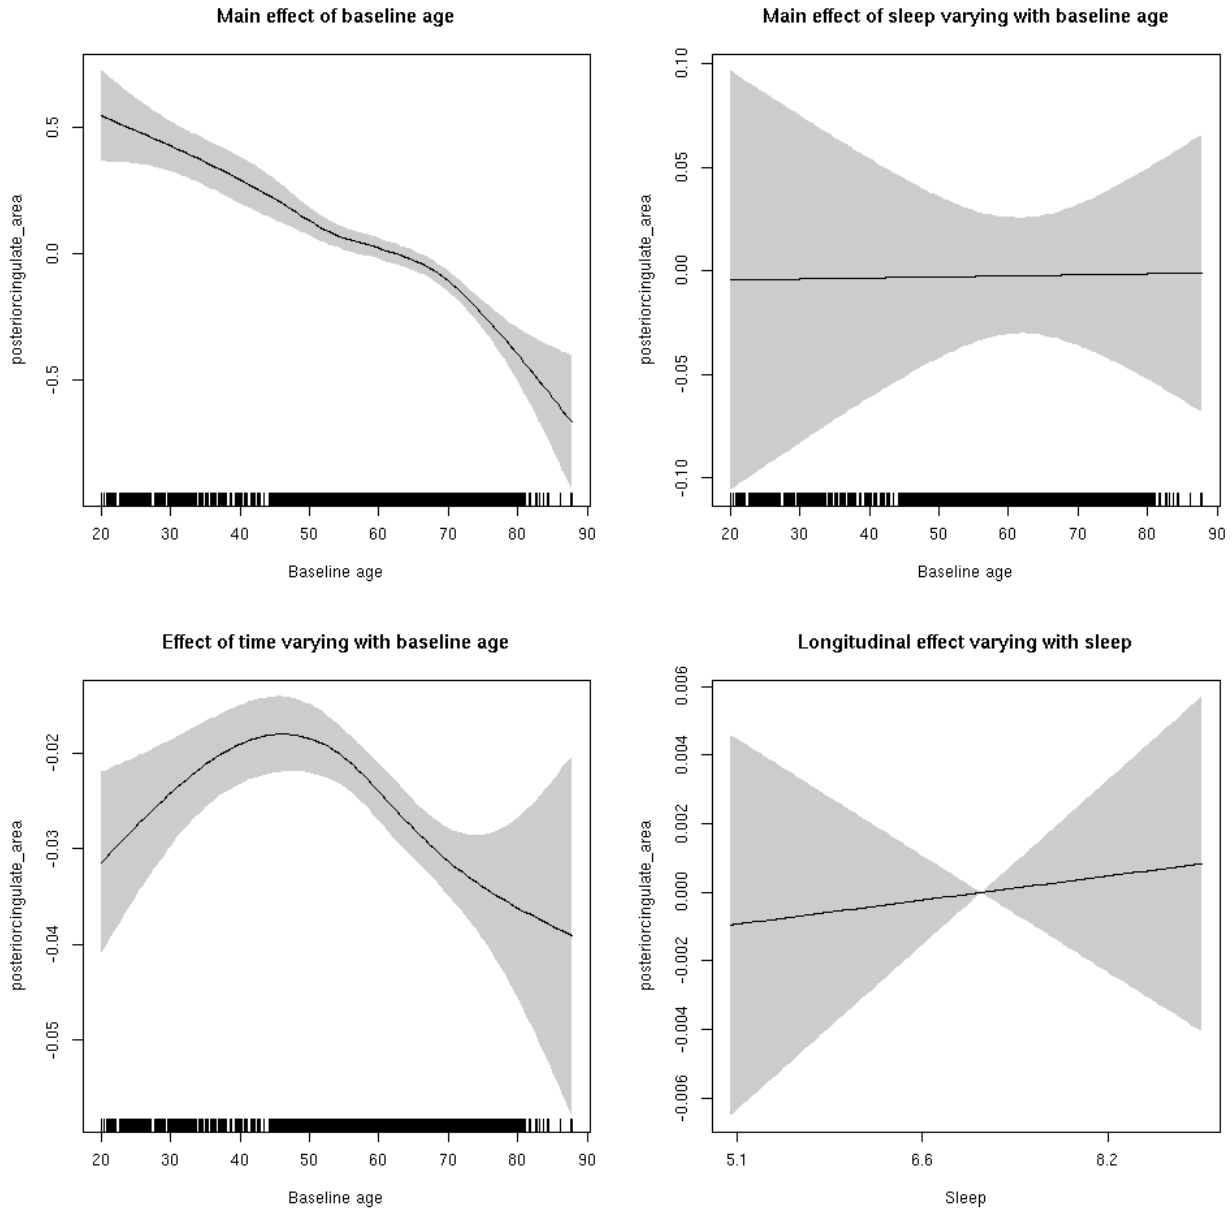

**Restricted to sleep  $\geq 5$  and  $\leq 9$  hours** Below is the row for `s(sleep_z):time` from the model output.

```
## s(sleep_z):time  1.000  1.000  0.117  0.732
```

Below are plots of a plot of `s(bl_age)`, `s(bl_age):sleep_z`, `s(bl_age):time`, and `s(sleep_z):time`. For `s(sleep_z):time`, roughly, if we cannot fit a straight line through the confidence bands, there is evidence that the effect of time depends on sleep duration. It is correct that the confidence interval is zero at one point along the axis; this happens because we do not include the main effect.



### posteriorcingulate\_thickness: Stratified by sex

**Female: Full data** Below is the row for `s(sleep_z):time` from the model output.

```
## s(sleep_z):time      1      1 0.147  0.701
```

Below are plots of a plot of `s(bl_age)`, `s(bl_age):sleep_z`, `s(bl_age):time`, and `s(sleep_z):time`. For `s(sleep_z):time`, roughly, if we cannot fit a straight line through the confidence bands, there is evidence that the effect of time depends on sleep duration. It is correct that the confidence interval is zero at one point along the axis; this happens because we do not include the main effect.

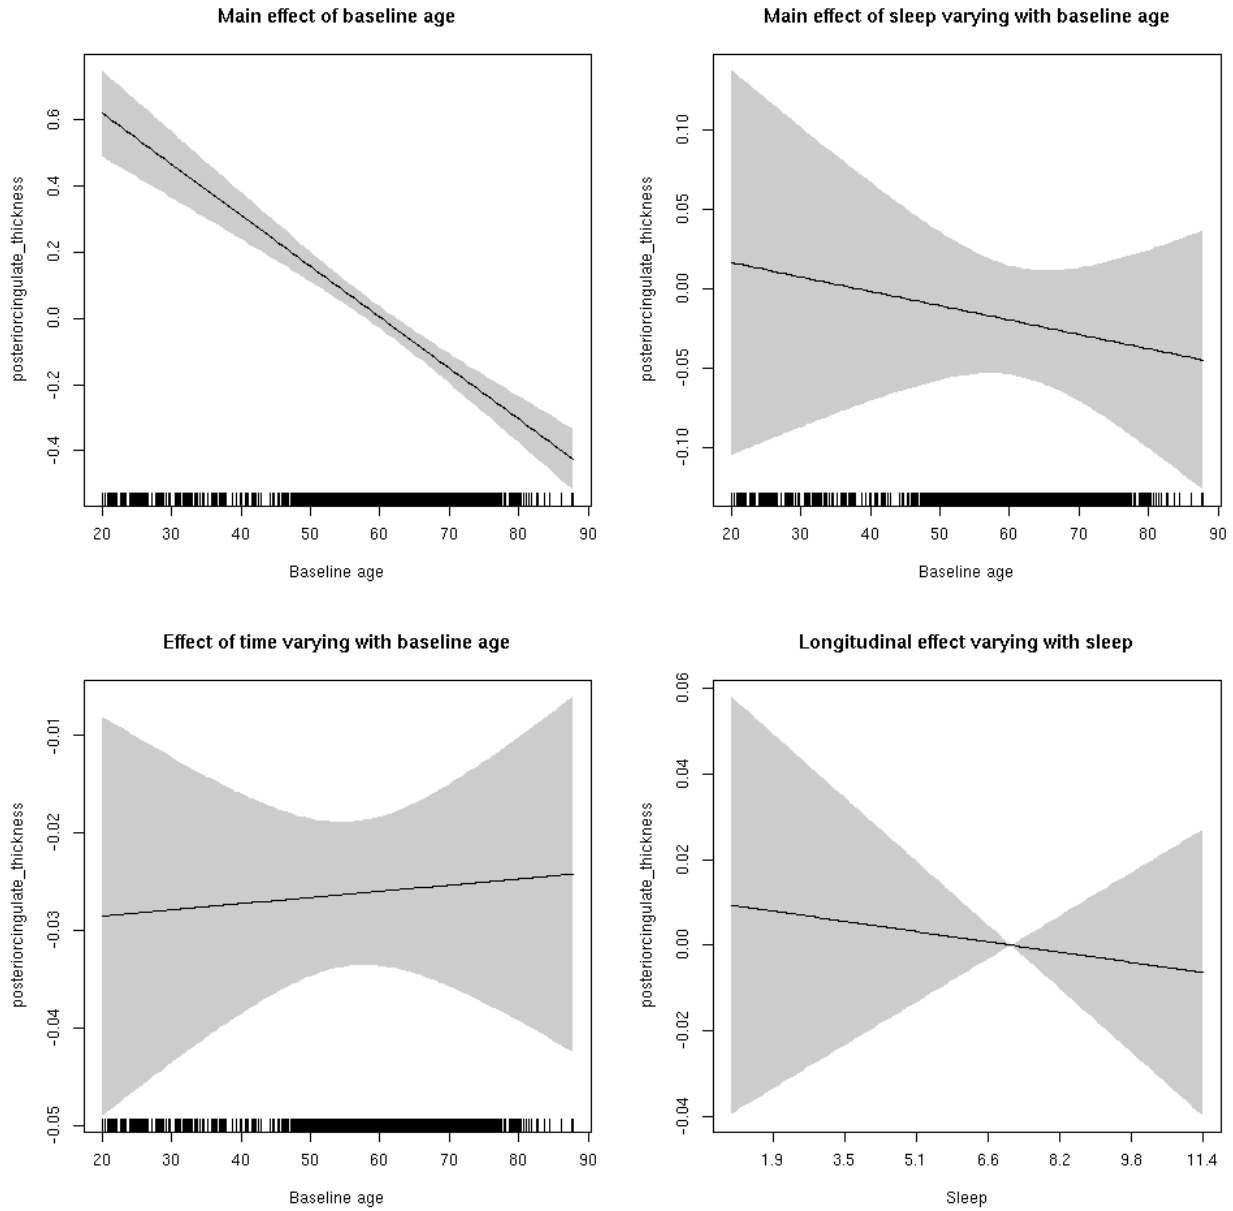

**Male: Full data** Below is the row for `s(sleep_z):time` from the model output.

```
## s(sleep_z):time      1      1 0.020  0.888
```

Below are plots of a plot of `s(bl_age)`, `s(bl_age):sleep_z`, `s(bl_age):time`, and `s(sleep_z):time`. For `s(sleep_z):time`, roughly, if we cannot fit a straight line through the confidence bands, there is evidence that the effect of time depends on sleep duration. It is correct that the confidence interval is zero at one point along the axis; this happens because we do not include the main effect.

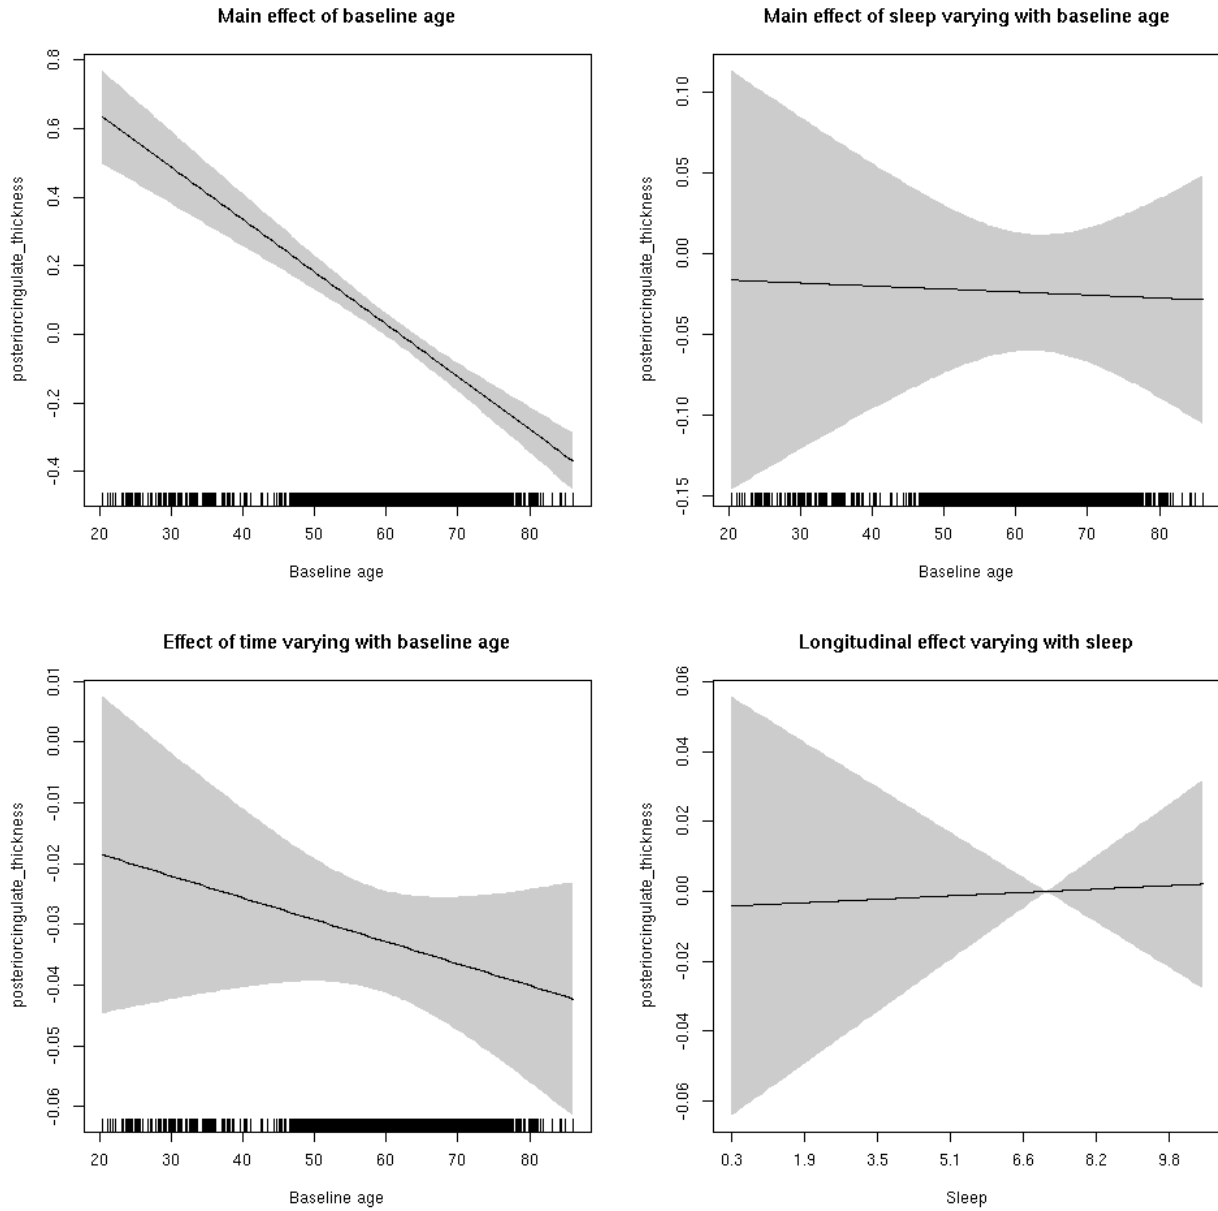

## posteriorcingulate\_thickness

**Full data** Below is the model output. The term `s(sleep_z):time` is probably what we care most about.

```
##
## Family: gaussian
## Link function: identity
##
## Formula:
## value ~ sex + site + s(bl_age, k = 10, bs = "cr") + s(bl_age,
##   by = sleep_z, bs = "cr") + +s(bl_age, by = time, k = 5, bs = "cr") +
##   s(sleep_z, by = time, k = 5, bs = "cr", pc = 0)
## <environment: 0x5630035ddfc8>
```

```

##
## Parametric coefficients:
##           Estimate Std. Error t value Pr(>|t|)
## (Intercept) -1.57531    0.04672 -33.719 < 2e-16 ***
## sexmale     -0.08780    0.02338  -3.756 0.000174 ***
## siteousAvanto  0.04018    0.06215   0.646 0.518000
## siteousPrisma  0.03305    0.27224   0.121 0.903364
## siteousSkyra  -0.25572    0.06212  -4.117 3.88e-05 ***
## siteUB       0.25328    0.12367   2.048 0.040580 *
## siteUCAM     0.07527    0.06442   1.168 0.242682
## siteUKB      1.88770    0.04739  39.832 < 2e-16 ***
## siteUmU      0.27435    0.07694   3.566 0.000365 ***
## ---
## Signif. codes:  0 '***' 0.001 '**' 0.01 '*' 0.05 '.' 0.1 ' ' 1
##
## Approximate significance of smooth terms:
##           edf Ref.df    F p-value
## s(bl_age)      4.242  4.242 46.869 <2e-16 ***
## s(bl_age):sleep_z 2.000  2.000  1.467  0.231
## s(bl_age):time  2.000  2.000 55.334 <2e-16 ***
## s(sleep_z):time  1.000  1.000  0.075  0.784
## ---
## Signif. codes:  0 '***' 0.001 '**' 0.01 '*' 0.05 '.' 0.1 ' ' 1
##
## R-sq.(adj) =  0.562
## lmer.REML = 14727  Scale est. = 0.12833  n = 8178

```

Below are plots of a plot of `s(bl_age)`, `s(bl_age):sleep_z`, `s(bl_age):time`, and `s(sleep_z):time`. For `s(sleep_z):time`, roughly, if we cannot fit a straight line through the confidence bands, there is evidence that the effect of time depends on sleep duration. It is correct that the confidence interval is zero at one point along the axis; this happens because we do not include the main effect.

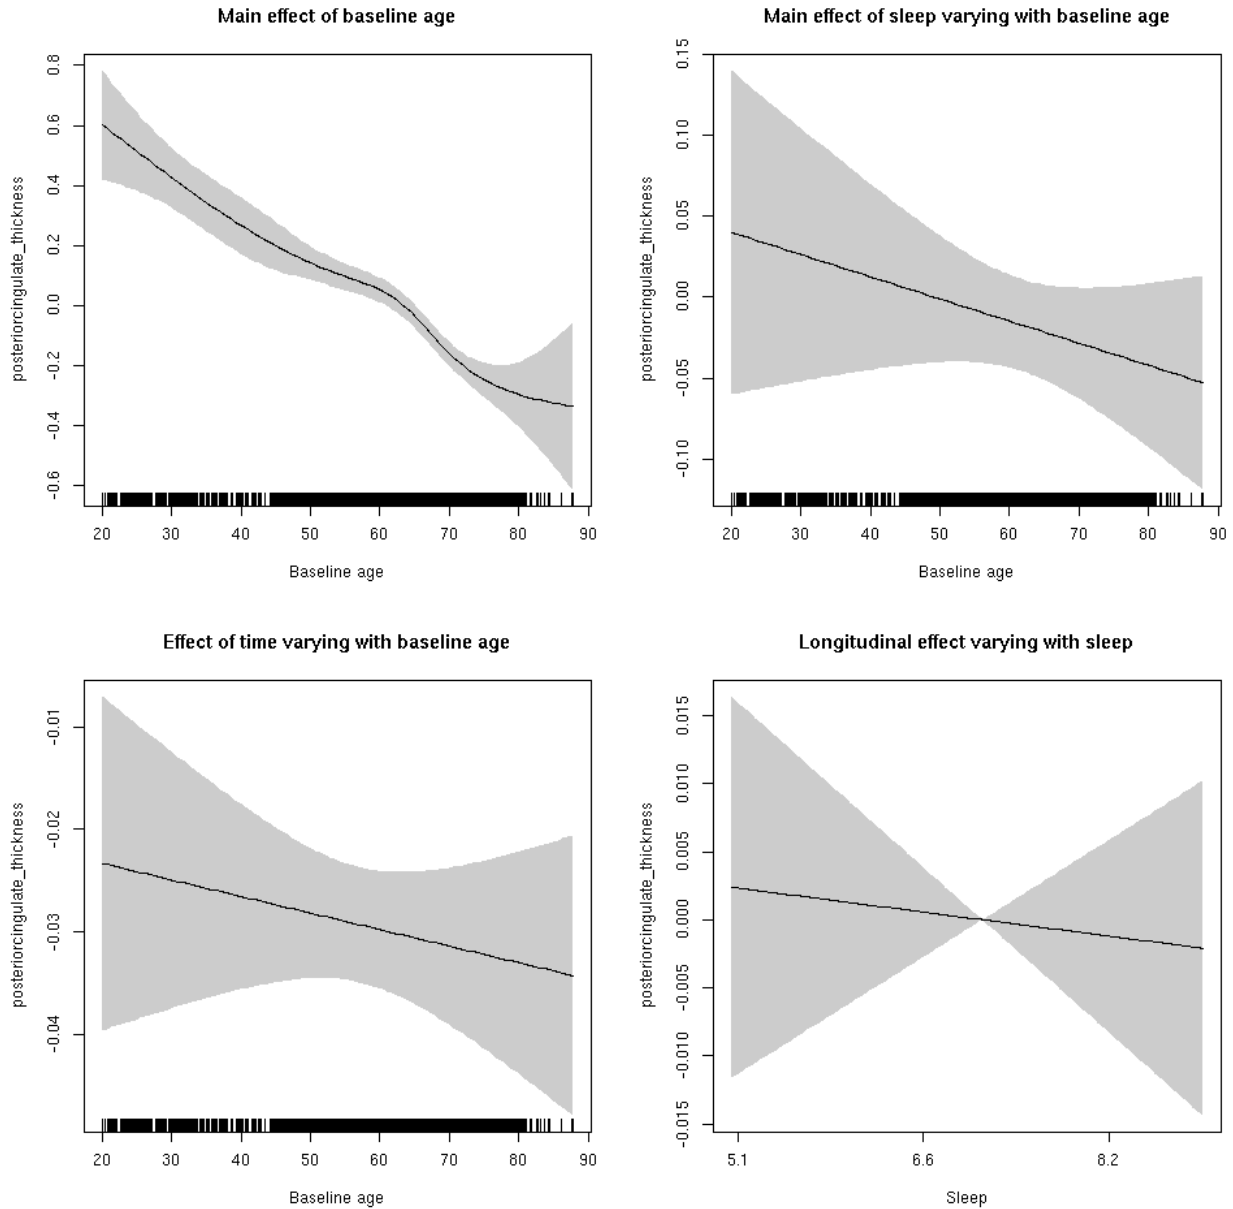

**Restricted to sleep  $\geq 5$  and  $\leq 9$  hours** Below is the row for `s(sleep_z):time` from the model output.

```
## s(sleep_z):time 1.000 1.000 0.116 0.733
```

Below are plots of a plot of `s(bl_age)`, `s(bl_age):sleep_z`, `s(bl_age):time`, and `s(sleep_z):time`. For `s(sleep_z):time`, roughly, if we cannot fit a straight line through the confidence bands, there is evidence that the effect of time depends on sleep duration. It is correct that the confidence interval is zero at one point along the axis; this happens because we do not include the main effect.



### posteriorcingulate\_volume: Stratified by sex

**Female: Full data** Below is the row for `s(sleep_z):time` from the model output.

```
## s(sleep_z):time  1.000  1.000  0.006  0.9374
```

Below are plots of a plot of `s(bl_age)`, `s(bl_age):sleep_z`, `s(bl_age):time`, and `s(sleep_z):time`. For `s(sleep_z):time`, roughly, if we cannot fit a straight line through the confidence bands, there is evidence that the effect of time depends on sleep duration. It is correct that the confidence interval is zero at one point along the axis; this happens because we do not include the main effect.



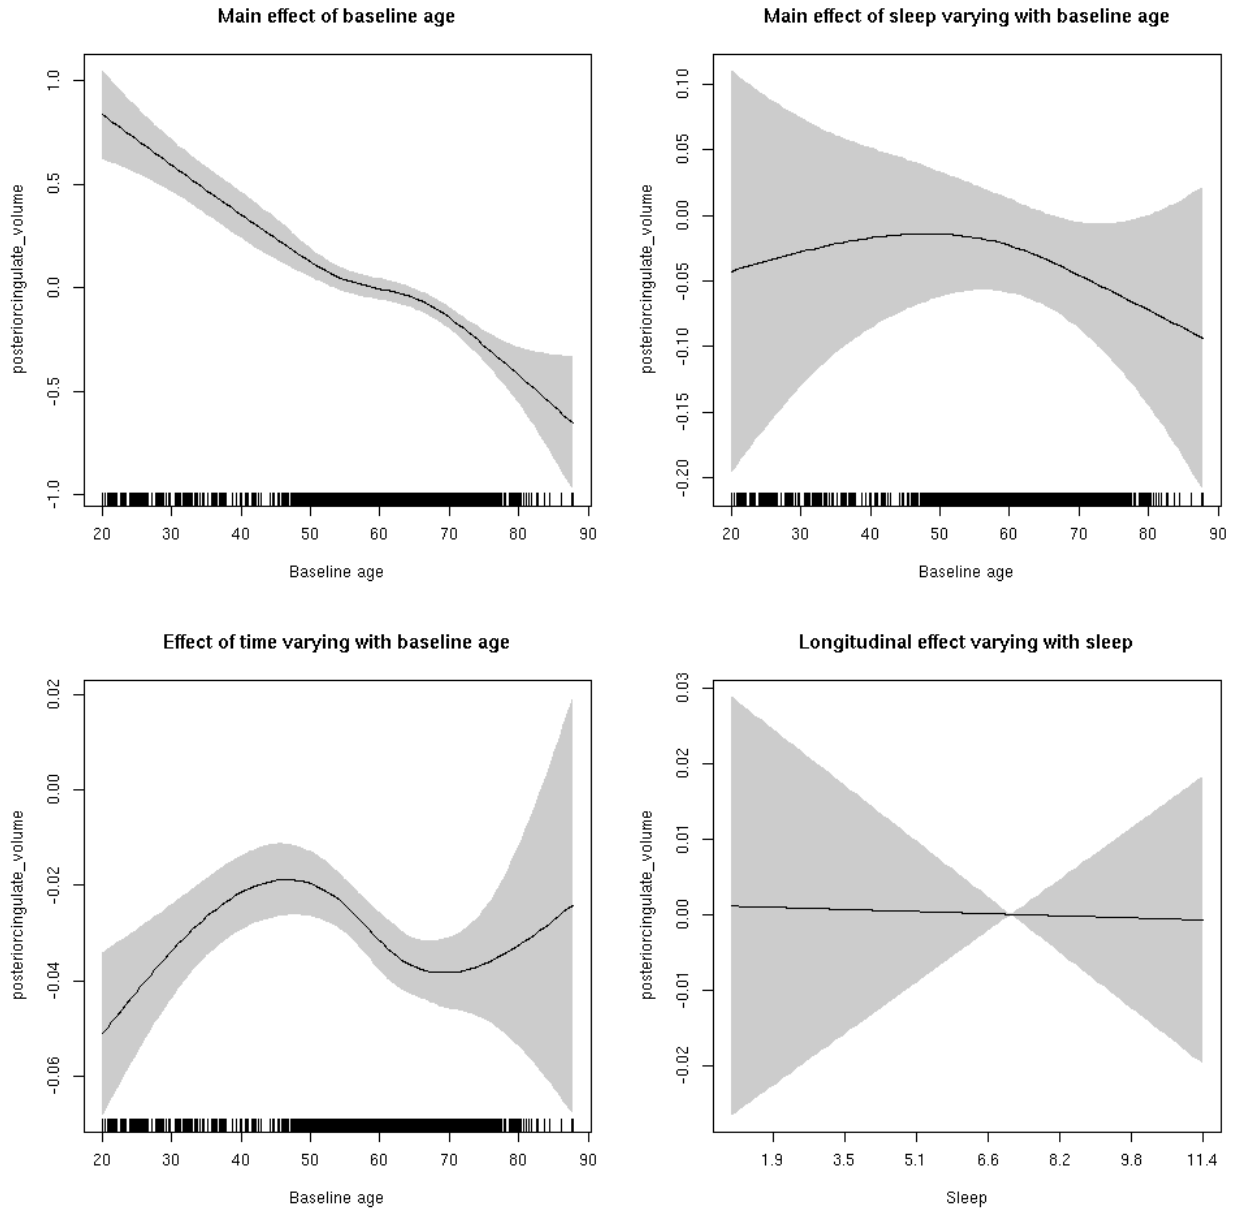

**Male: Full data** Below is the row for `s(sleep_z):time` from the model output.

```
## s(sleep_z):time  1.000  1.000  0.025  0.875
```

Below are plots of a plot of `s(bl_age)`, `s(bl_age):sleep_z`, `s(bl_age):time`, and `s(sleep_z):time`. For `s(sleep_z):time`, roughly, if we cannot fit a straight line through the confidence bands, there is evidence that the effect of time depends on sleep duration. It is correct that the confidence interval is zero at one point along the axis; this happens because we do not include the main effect.

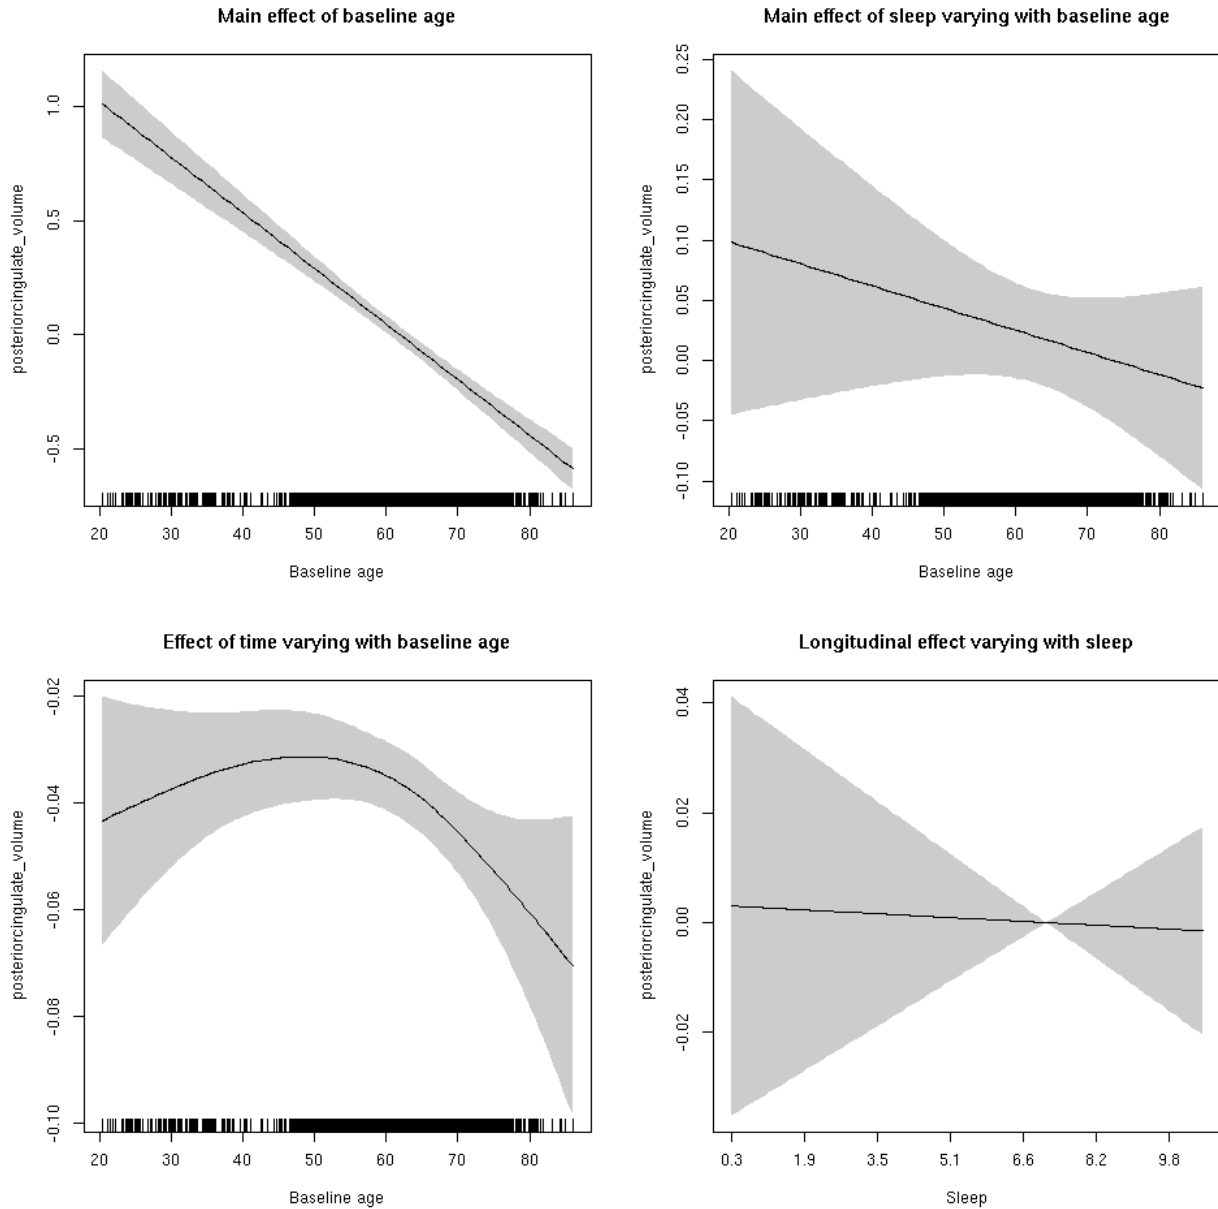

## posteriorcingulate\_volume

**Full data** Below is the model output. The term `s(sleep_z):time` is probably what we care most about.

```
##
## Family: gaussian
## Link function: identity
##
## Formula:
## value ~ sex + site + icv + s(bl_age, k = 10, bs = "cr") + s(bl_age,
##   by = sleep_z, bs = "cr") + +s(bl_age, by = time, k = 5, bs = "cr") +
##   s(sleep_z, by = time, k = 5, bs = "cr", pc = 0)
## <environment: 0x5630035ae418>
```

```

##
## Parametric coefficients:
##           Estimate Std. Error t value Pr(>|t|)
## (Intercept) -0.07162    0.05655  -1.267 0.205357
## sexmale      0.11883    0.02907   4.088 4.39e-05 ***
## siteousAvanto -0.79560    0.06917 -11.502 < 2e-16 ***
## siteousPrisma -0.38630    0.17657  -2.188 0.028714 *
## siteousSkyra  -0.48033    0.06694  -7.175 7.86e-13 ***
## siteUB       -0.63739    0.12998  -4.904 9.58e-07 ***
## siteUCAM     -0.61191    0.06999  -8.743 < 2e-16 ***
## siteUKB      0.19725    0.05359   3.681 0.000234 ***
## siteUmU     -0.23604    0.08064  -2.927 0.003431 **
## icv         0.52138    0.01434  36.356 < 2e-16 ***
## ---
## Signif. codes:  0 '***' 0.001 '**' 0.01 '*' 0.05 '.' 0.1 ' ' 1
##
## Approximate significance of smooth terms:
##           edf Ref.df      F p-value
## s(bl_age)      2.713  2.713 118.356 <2e-16 ***
## s(bl_age):sleep_z 2.000  2.000   1.235  0.291
## s(bl_age):time  3.490  3.490 128.634 <2e-16 ***
## s(sleep_z):time  1.000  1.000   0.031  0.861
## ---
## Signif. codes:  0 '***' 0.001 '**' 0.01 '*' 0.05 '.' 0.1 ' ' 1
##
## R-sq.(adj) =  0.452
## lmer.REML = 10454 Scale est. = 0.044804 n = 8166

```

Below are plots of a plot of `s(bl_age)`, `s(bl_age):sleep_z`, `s(bl_age):time`, and `s(sleep_z):time`. For `s(sleep_z):time`, roughly, if we cannot fit a straight line through the confidence bands, there is evidence that the effect of time depends on sleep duration. It is correct that the confidence interval is zero at one point along the axis; this happens because we do not include the main effect.

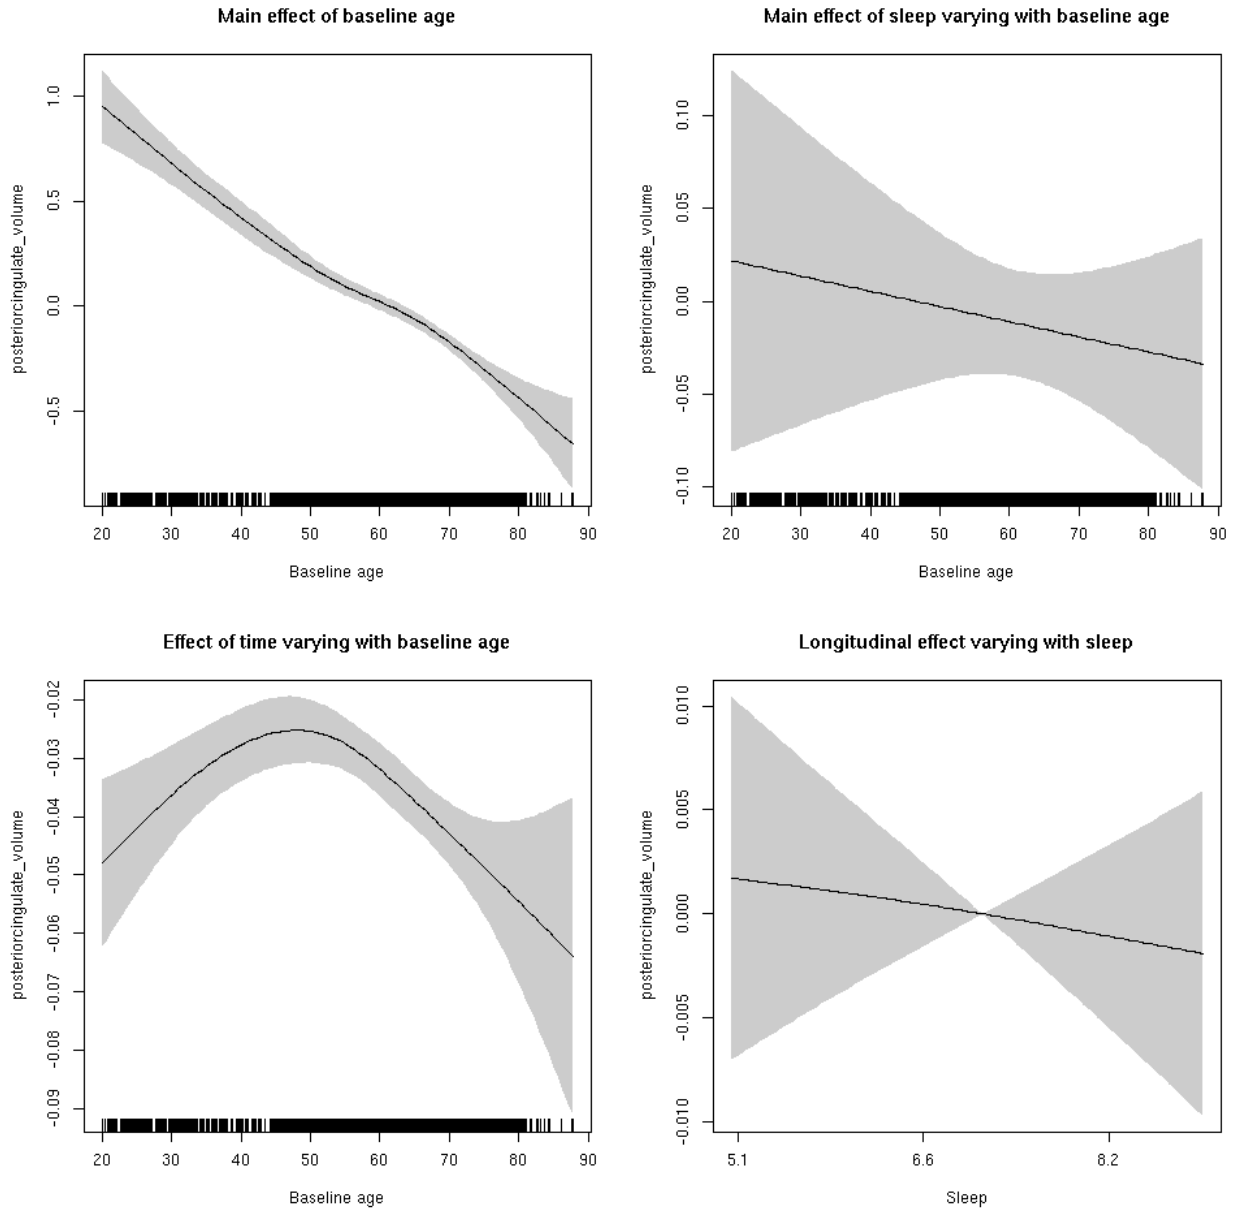

**Restricted to sleep  $\geq 5$  and  $\leq 9$  hours** Below is the row for `s(sleep_z):time` from the model output.

```
## s(sleep_z):time  1.032  1.032  0.182  0.663
```

Below are plots of a plot of `s(bl_age)`, `s(bl_age):sleep_z`, `s(bl_age):time`, and `s(sleep_z):time`. For `s(sleep_z):time`, roughly, if we cannot fit a straight line through the confidence bands, there is evidence that the effect of time depends on sleep duration. It is correct that the confidence interval is zero at one point along the axis; this happens because we do not include the main effect.

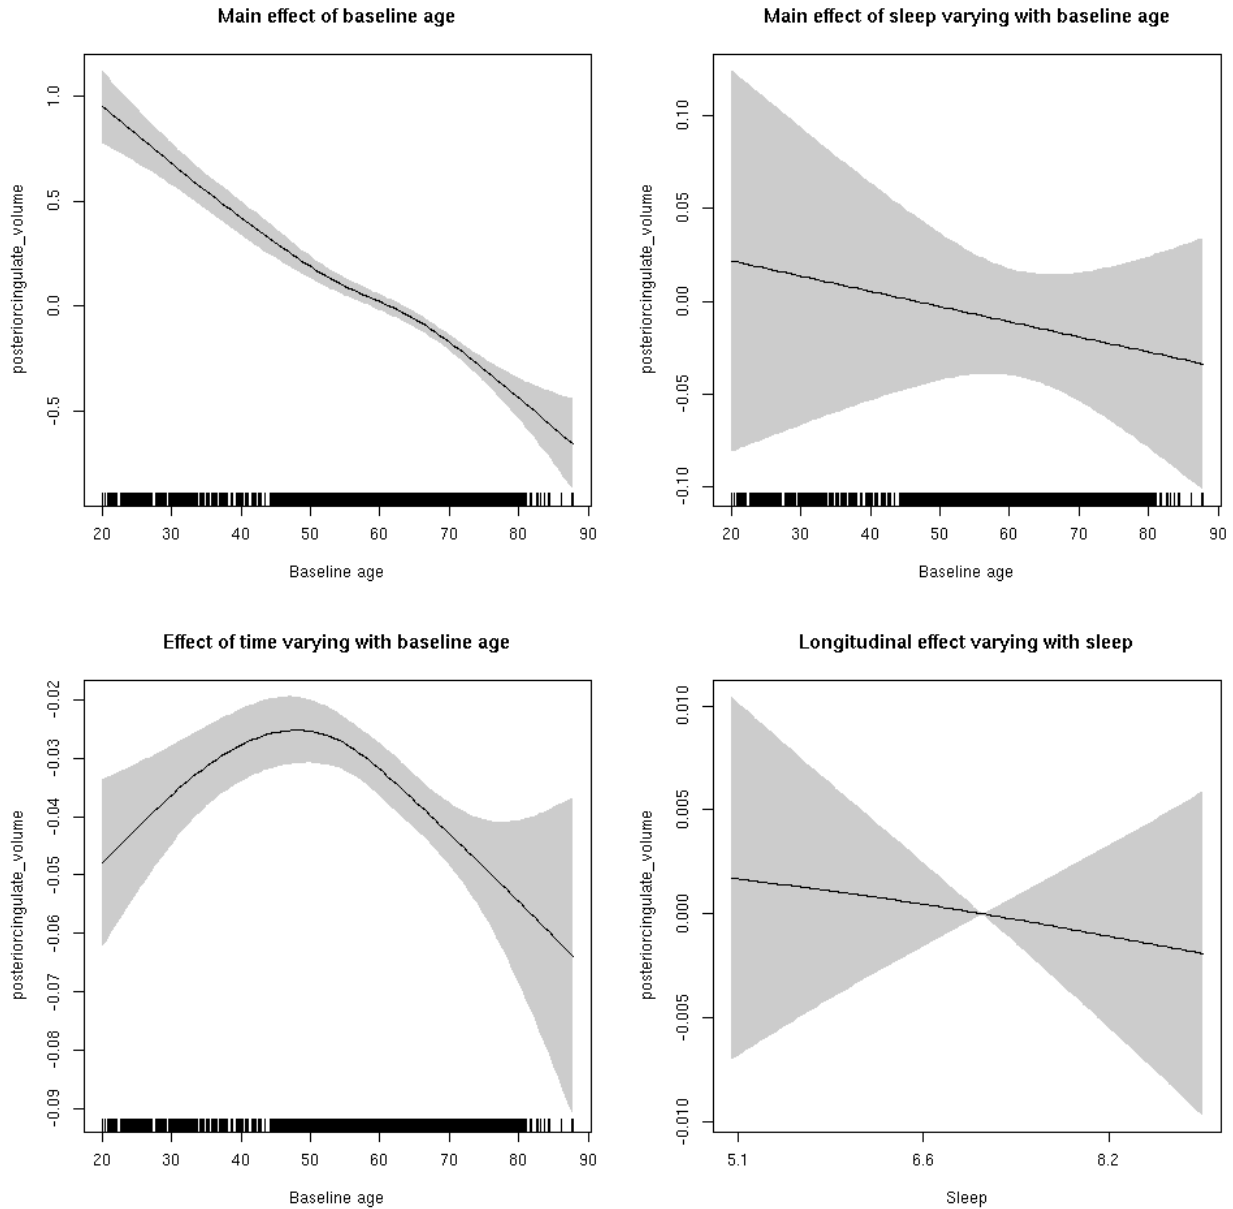

### precentral\_area: Stratified by sex

**Female: Full data** Below is the row for `s(sleep_z):time` from the model output.

```
## s(sleep_z):time  1.000  1.000 3.685 0.05497 .
```

Below are plots of a plot of `s(bl_age)`, `s(bl_age):sleep_z`, `s(bl_age):time`, and `s(sleep_z):time`. For `s(sleep_z):time`, roughly, if we cannot fit a straight line through the confidence bands, there is evidence that the effect of time depends on sleep duration. It is correct that the confidence interval is zero at one point along the axis; this happens because we do not include the main effect.

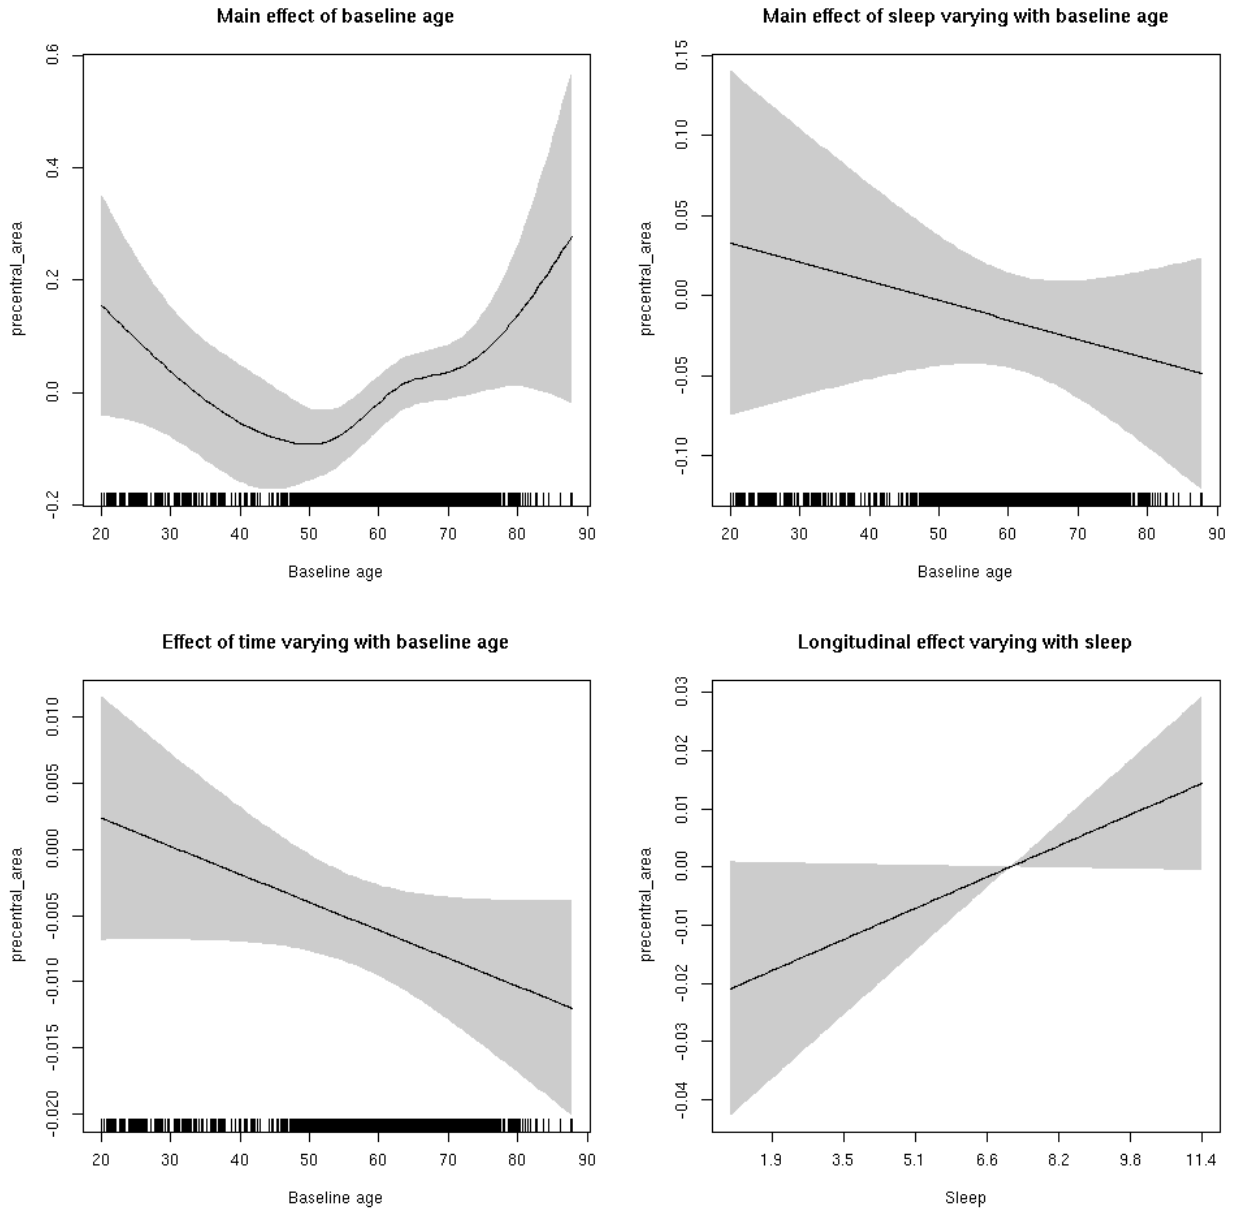

**Male: Full data** Below is the row for `s(sleep_z):time` from the model output.

```
## s(sleep_z):time    1    1 0.016  0.8979
```

Below are plots of a plot of `s(bl_age)`, `s(bl_age):sleep_z`, `s(bl_age):time`, and `s(sleep_z):time`. For `s(sleep_z):time`, roughly, if we cannot fit a straight line through the confidence bands, there is evidence that the effect of time depends on sleep duration. It is correct that the confidence interval is zero at one point along the axis; this happens because we do not include the main effect.

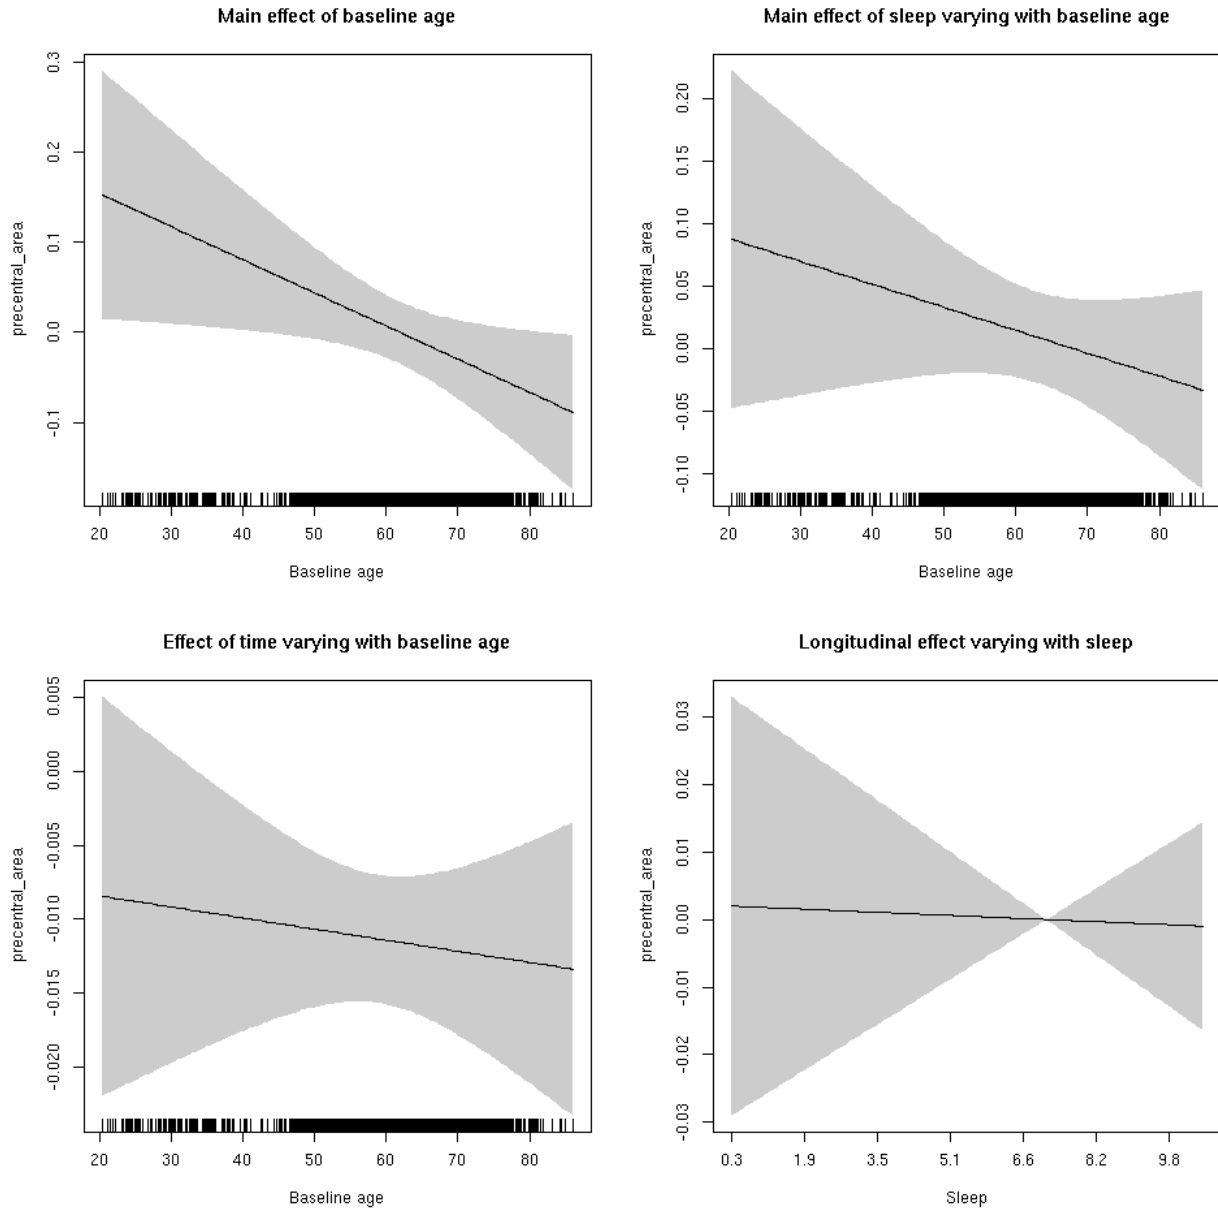

## precentral\_area

**Full data** Below is the model output. The term `s(sleep_z):time` is probably what we care most about.

```
##
## Family: gaussian
## Link function: identity
##
## Formula:
## value ~ sex + site + icv + s(bl_age, k = 10, bs = "cr") + s(bl_age,
##   by = sleep_z, bs = "cr") + +s(bl_age, by = time, k = 5, bs = "cr") +
##   s(sleep_z, by = time, k = 5, bs = "cr", pc = 0)
## <environment: 0x5630035aef78>
```

```

##
## Parametric coefficients:
##           Estimate Std. Error t value Pr(>|t|)
## (Intercept)  0.82064    0.05309  15.458 < 2e-16 ***
## sexmale      0.29179    0.02728  10.697 < 2e-16 ***
## siteousAvanto -0.59761    0.06477  -9.227 < 2e-16 ***
## siteousPrisma -0.75940    0.14656  -5.182 2.25e-07 ***
## siteousSkyra  -0.73987    0.06270 -11.800 < 2e-16 ***
## siteUB       -0.75414    0.12225  -6.169 7.20e-10 ***
## siteUCAM     -0.66237    0.06584 -10.060 < 2e-16 ***
## siteUKB      -0.98695    0.05040 -19.581 < 2e-16 ***
## siteUmU      -0.09258    0.07575  -1.222  0.222
## icv          0.60757    0.01341  45.317 < 2e-16 ***
## ---
## Signif. codes:  0 '***' 0.001 '**' 0.01 '*' 0.05 '.' 0.1 ' ' 1
##
## Approximate significance of smooth terms:
##           edf Ref.df    F p-value
## s(bl_age)      3.13  3.13  2.931  0.0365 *
## s(bl_age):sleep_z 2.00  2.00  1.343  0.2611
## s(bl_age):time  2.00  2.00 19.633 <2e-16 ***
## s(sleep_z):time  1.00  1.00  1.319  0.2507
## ---
## Signif. codes:  0 '***' 0.001 '**' 0.01 '*' 0.05 '.' 0.1 ' ' 1
##
## R-sq.(adj) =  0.513
## lmer.REML = 8103.9  Scale est. = 0.028973  n = 8164

```

Below are plots of a plot of  $s(\text{bl\_age})$ ,  $s(\text{bl\_age}):\text{sleep\_z}$ ,  $s(\text{bl\_age}):\text{time}$ , and  $s(\text{sleep\_z}):\text{time}$ . For  $s(\text{sleep\_z}):\text{time}$ , roughly, if we cannot fit a straight line through the confidence bands, there is evidence that the effect of time depends on sleep duration. It is correct that the confidence interval is zero at one point along the axis; this happens because we do not include the main effect.



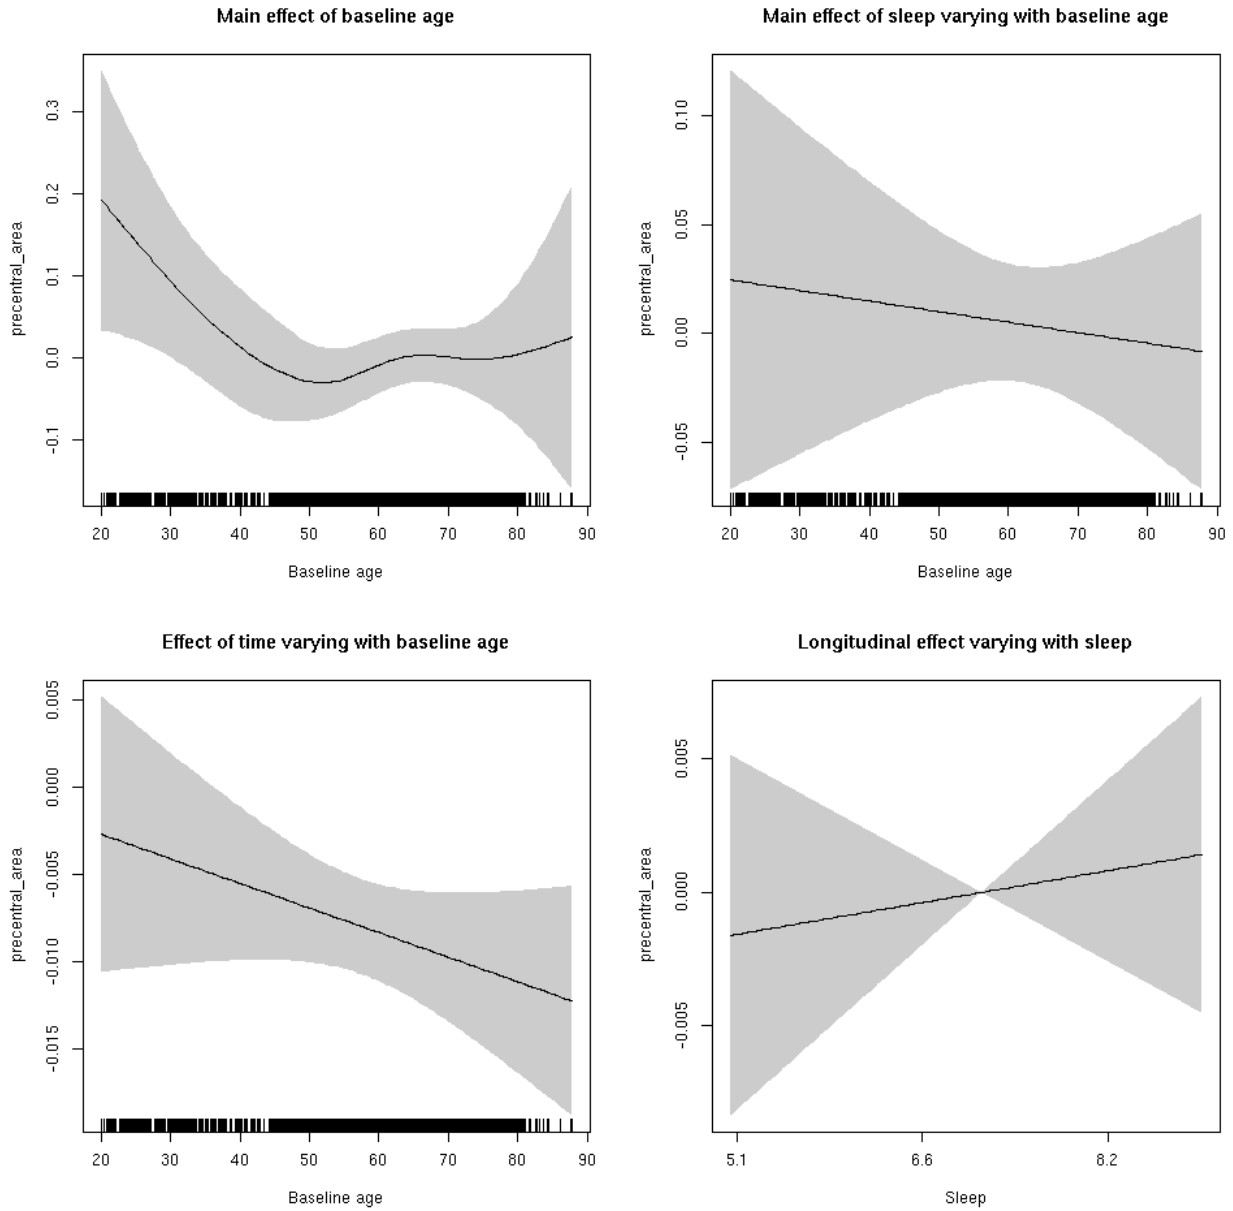

**Restricted to sleep  $\geq 5$  and  $\leq 9$  hours** Below is the row for `s(sleep_z):time` from the model output.

```
## s(sleep_z):time 1.000 1.000 0.228 0.6333
```

Below are plots of a plot of `s(bl_age)`, `s(bl_age):sleep_z`, `s(bl_age):time`, and `s(sleep_z):time`. For `s(sleep_z):time`, roughly, if we cannot fit a straight line through the confidence bands, there is evidence that the effect of time depends on sleep duration. It is correct that the confidence interval is zero at one point along the axis; this happens because we do not include the main effect.

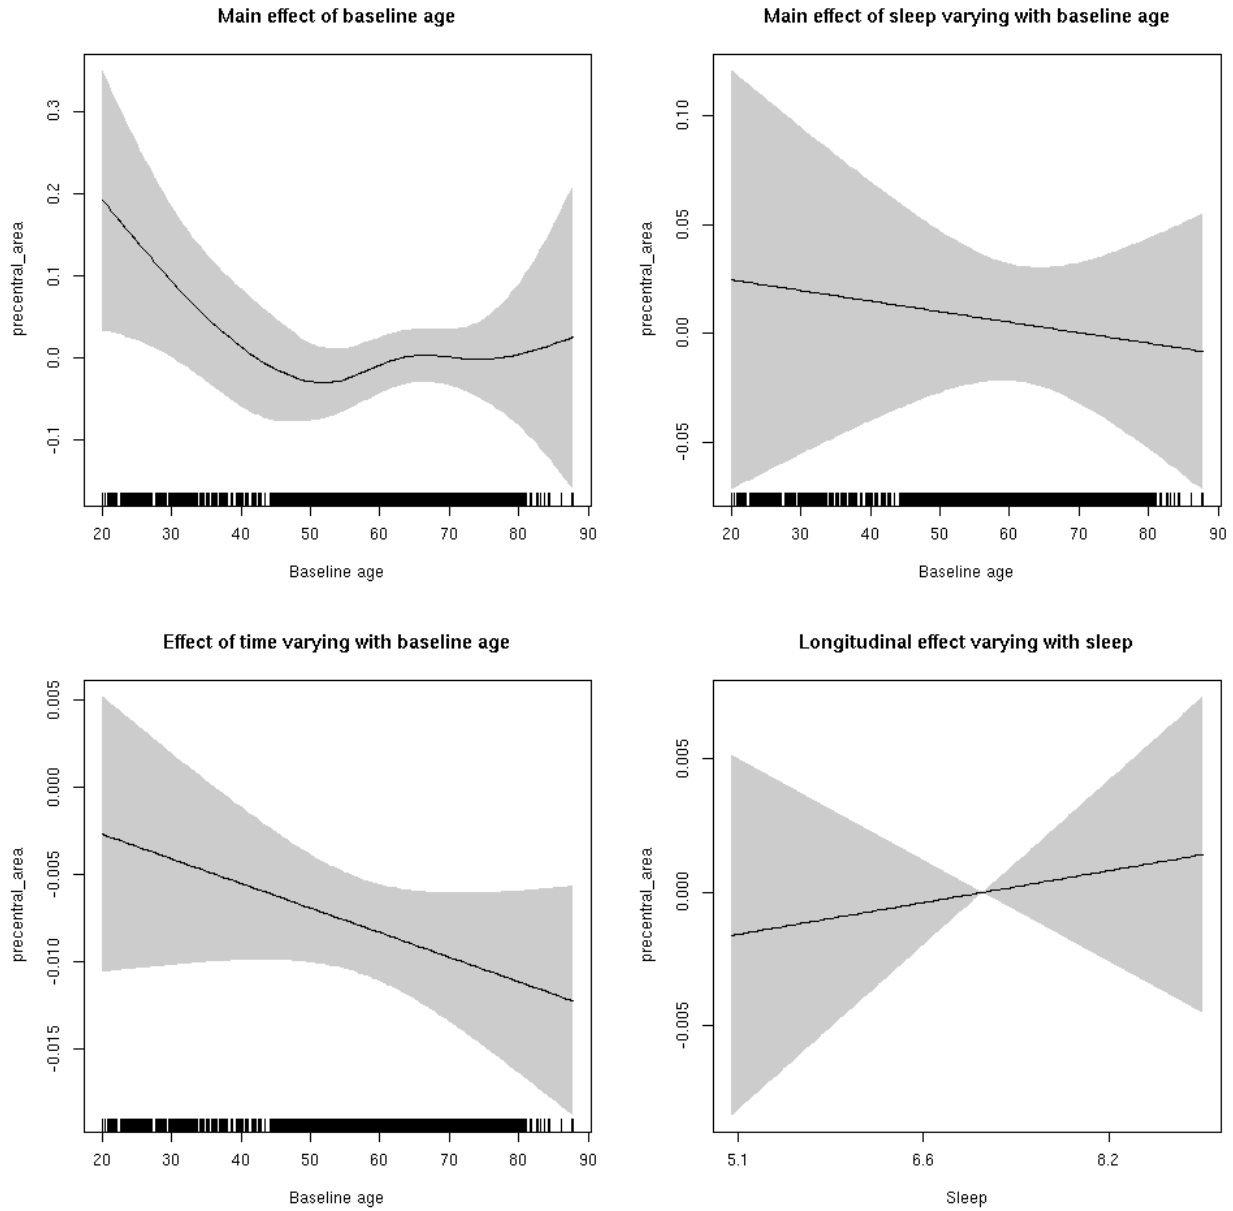

### precentral\_thickness: Stratified by sex

**Female: Full data** Below is the row for `s(sleep_z):time` from the model output.

```
## s(sleep_z):time  1.000  1.000  0.535  0.464
```

Below are plots of a plot of `s(bl_age)`, `s(bl_age):sleep_z`, `s(bl_age):time`, and `s(sleep_z):time`. For `s(sleep_z):time`, roughly, if we cannot fit a straight line through the confidence bands, there is evidence that the effect of time depends on sleep duration. It is correct that the confidence interval is zero at one point along the axis; this happens because we do not include the main effect.

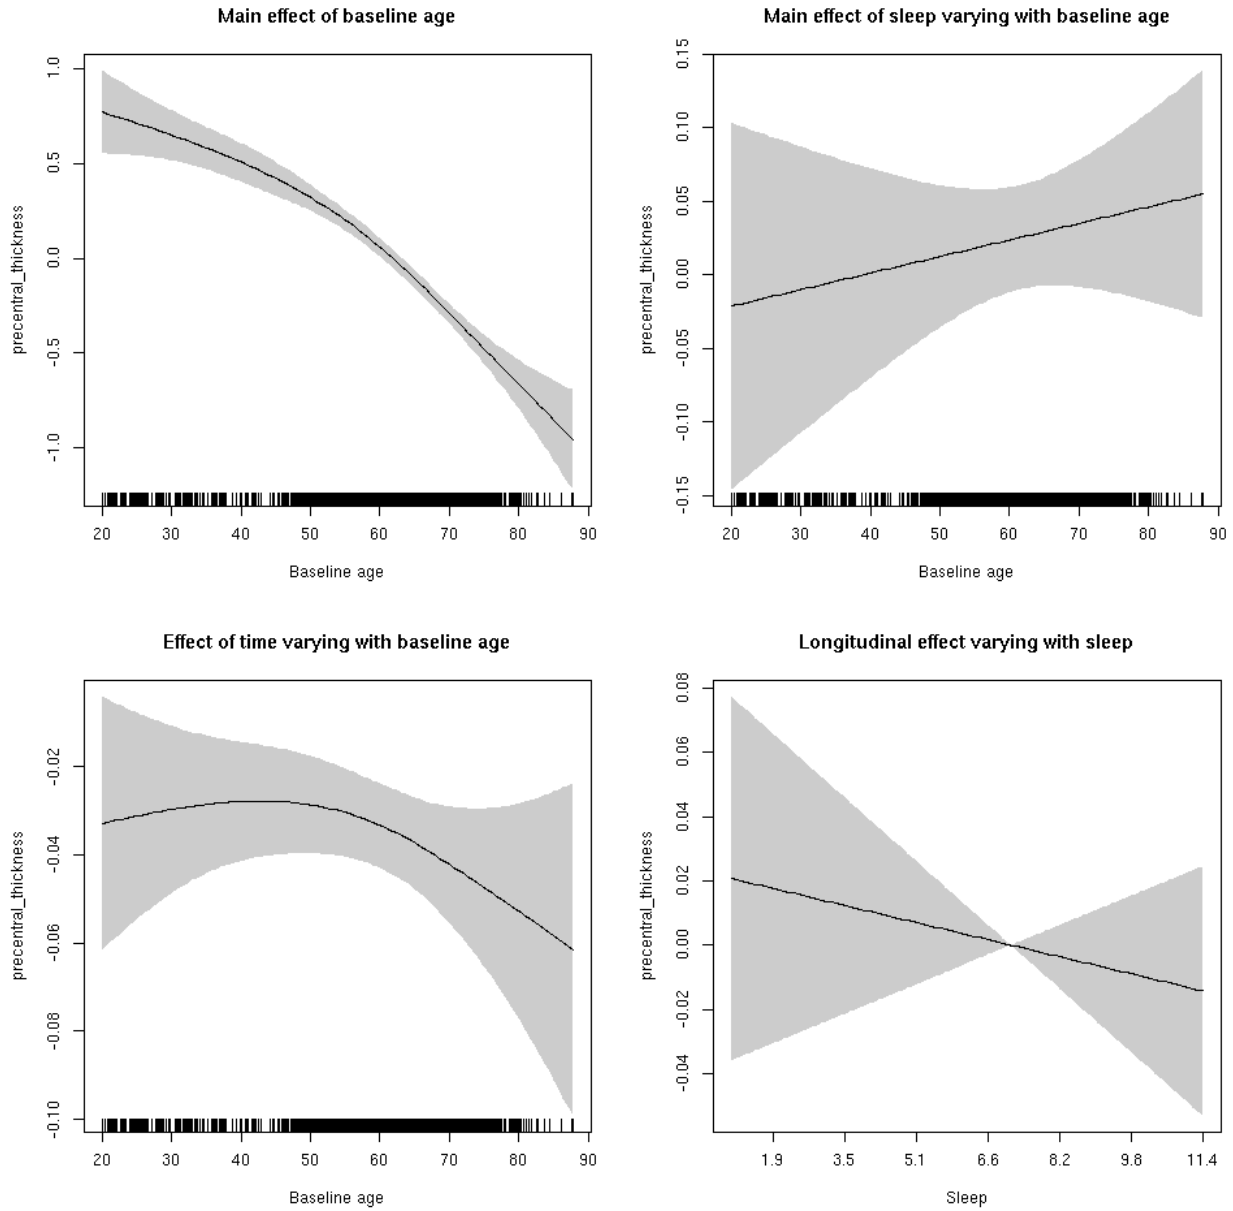

**Male: Full data** Below is the row for `s(sleep_z):time` from the model output.

```
## s(sleep_z):time  1.000  1.000  0.132  0.717
```

Below are plots of a plot of `s(bl_age)`, `s(bl_age):sleep_z`, `s(bl_age):time`, and `s(sleep_z):time`. For `s(sleep_z):time`, roughly, if we cannot fit a straight line through the confidence bands, there is evidence that the effect of time depends on sleep duration. It is correct that the confidence interval is zero at one point along the axis; this happens because we do not include the main effect.

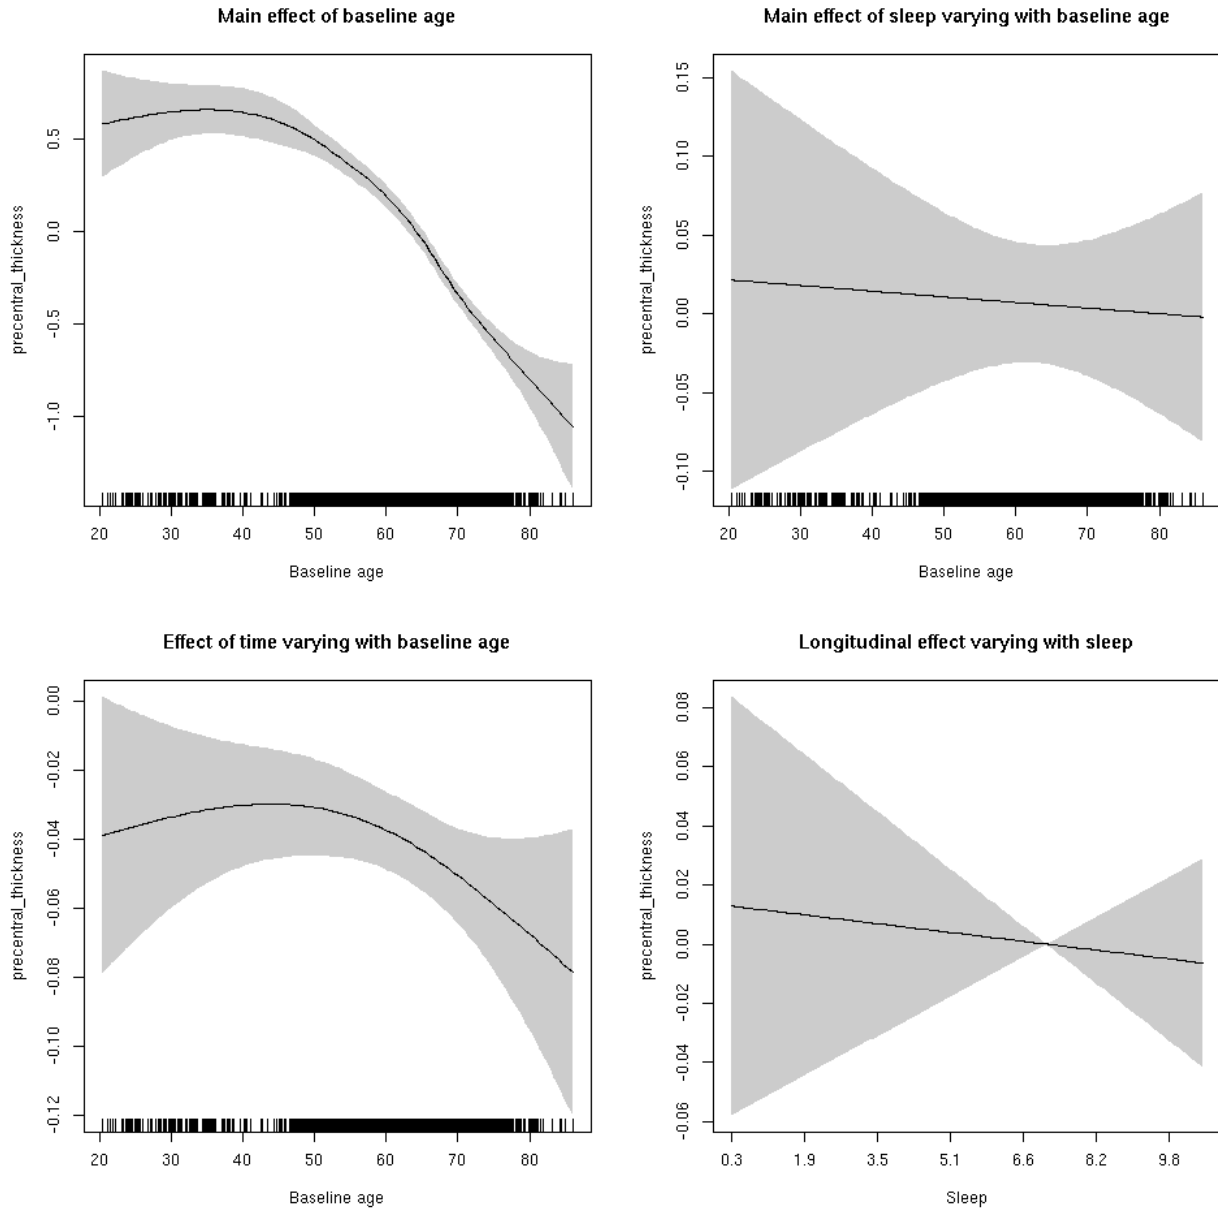

## precentral\_thickness

**Full data** Below is the model output. The term `s(sleep_z):time` is probably what we care most about.

```
##
## Family: gaussian
## Link function: identity
##
## Formula:
## value ~ sex + site + s(bl_age, k = 10, bs = "cr") + s(bl_age,
##   by = sleep_z, bs = "cr") + +s(bl_age, by = time, k = 5, bs = "cr") +
##   s(sleep_z, by = time, k = 5, bs = "cr", pc = 0)
## <environment: 0x5630035ce5b0>
```

```

##
## Parametric coefficients:
##           Estimate Std. Error t value Pr(>|t|)
## (Intercept) -0.90170    0.04805 -18.765 < 2e-16 ***
## sexmale     -0.07366    0.02404  -3.064 0.00219 **
## siteousAvanto -0.60867    0.06440  -9.452 < 2e-16 ***
## siteousPrisma 0.10094    0.31365   0.322 0.74759
## siteousSkyra -0.35788    0.06438  -5.559 2.8e-08 ***
## siteUB       0.29935    0.12653   2.366 0.01801 *
## siteUCAM     -0.01652    0.06623  -0.249 0.80302
## siteUKB      1.16066    0.04868  23.844 < 2e-16 ***
## siteUmU     -0.23623    0.07912  -2.986 0.00284 **
## ---
## Signif. codes:  0 '***' 0.001 '**' 0.01 '*' 0.05 '.' 0.1 ' ' 1
##
## Approximate significance of smooth terms:
##           edf Ref.df      F p-value
## s(bl_age)      3.802  3.802 192.699 <2e-16 ***
## s(bl_age):sleep_z 2.000  2.000   0.555  0.574
## s(bl_age):time  3.115  3.115  31.248 <2e-16 ***
## s(sleep_z):time 3.431  3.431   0.926  0.266
## ---
## Signif. codes:  0 '***' 0.001 '**' 0.01 '*' 0.05 '.' 0.1 ' ' 1
##
## R-sq.(adj) = 0.439
## lmer.REML = 16297 Scale est. = 0.17647 n = 8169

```

Below are plots of a plot of `s(bl_age)`, `s(bl_age):sleep_z`, `s(bl_age):time`, and `s(sleep_z):time`. For `s(sleep_z):time`, roughly, if we cannot fit a straight line through the confidence bands, there is evidence that the effect of time depends on sleep duration. It is correct that the confidence interval is zero at one point along the axis; this happens because we do not include the main effect.

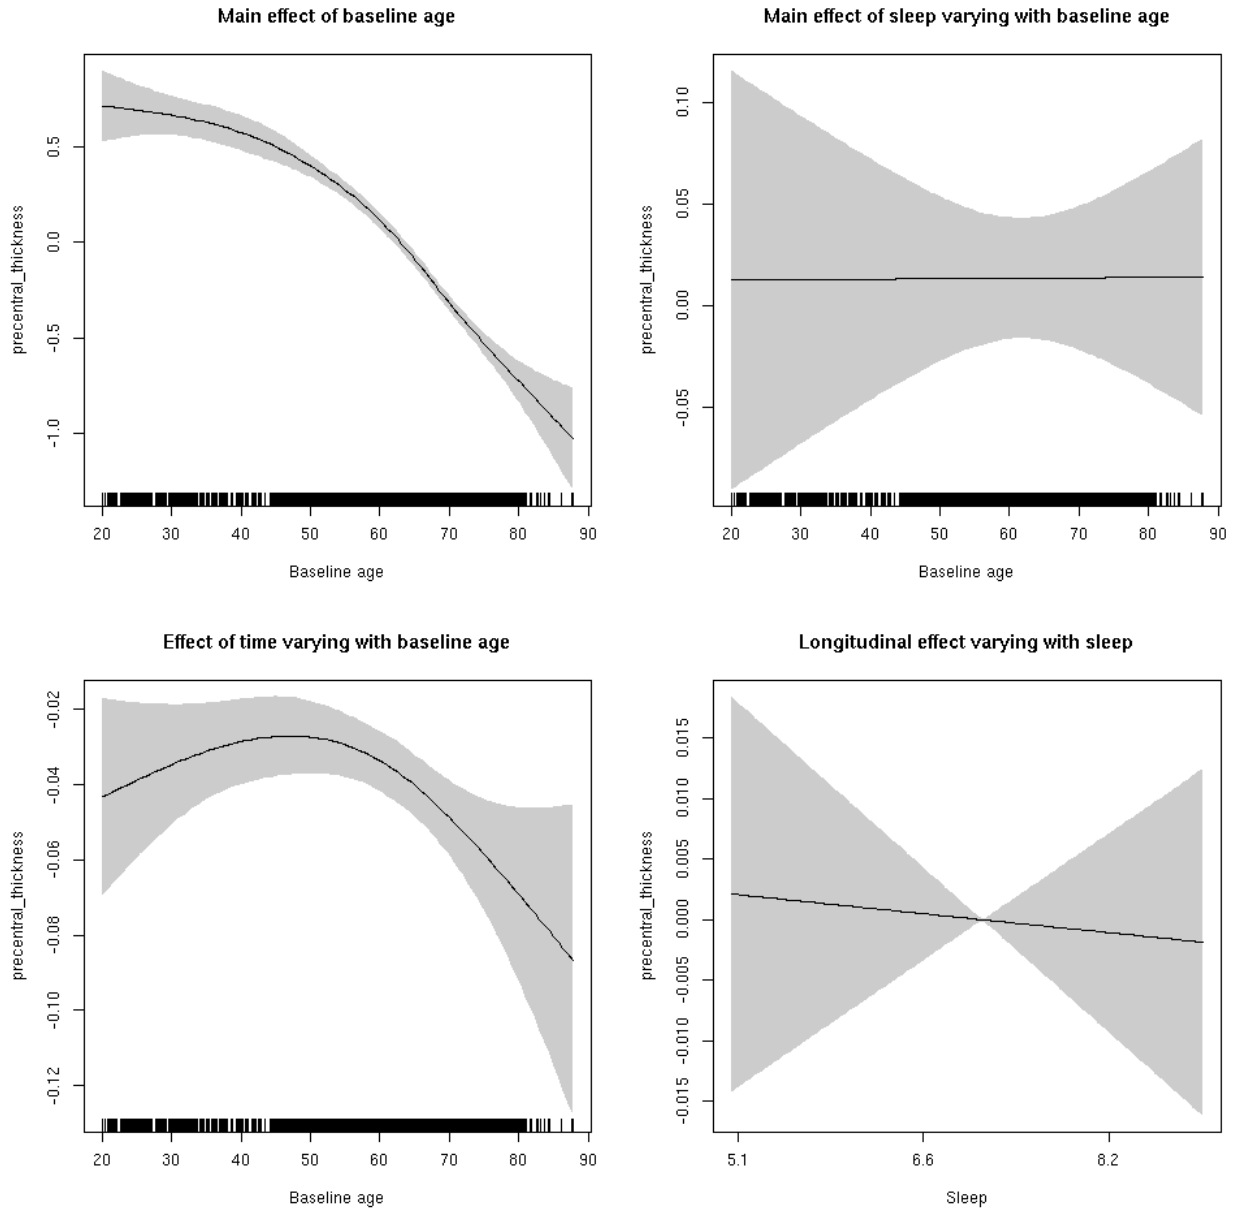

**Restricted to sleep  $\geq 5$  and  $\leq 9$  hours** Below is the row for `s(sleep_z):time` from the model output.

```
## s(sleep_z):time  1.000  1.000  0.067  0.795
```

Below are plots of a plot of `s(bl_age)`, `s(bl_age):sleep_z`, `s(bl_age):time`, and `s(sleep_z):time`. For `s(sleep_z):time`, roughly, if we cannot fit a straight line through the confidence bands, there is evidence that the effect of time depends on sleep duration. It is correct that the confidence interval is zero at one point along the axis; this happens because we do not include the main effect.



## precentral\_volume: Stratified by sex

**Female: Full data** Below is the row for `s(sleep_z):time` from the model output.

```
## s(sleep_z):time  3.778  3.778  3.450 0.00537 **
```

Below are plots of a plot of `s(bl_age)`, `s(bl_age):sleep_z`, `s(bl_age):time`, and `s(sleep_z):time`. For `s(sleep_z):time`, roughly, if we cannot fit a straight line through the confidence bands, there is evidence that the effect of time depends on sleep duration. It is correct that the confidence interval is zero at one point along the axis; this happens because we do not include the main effect.

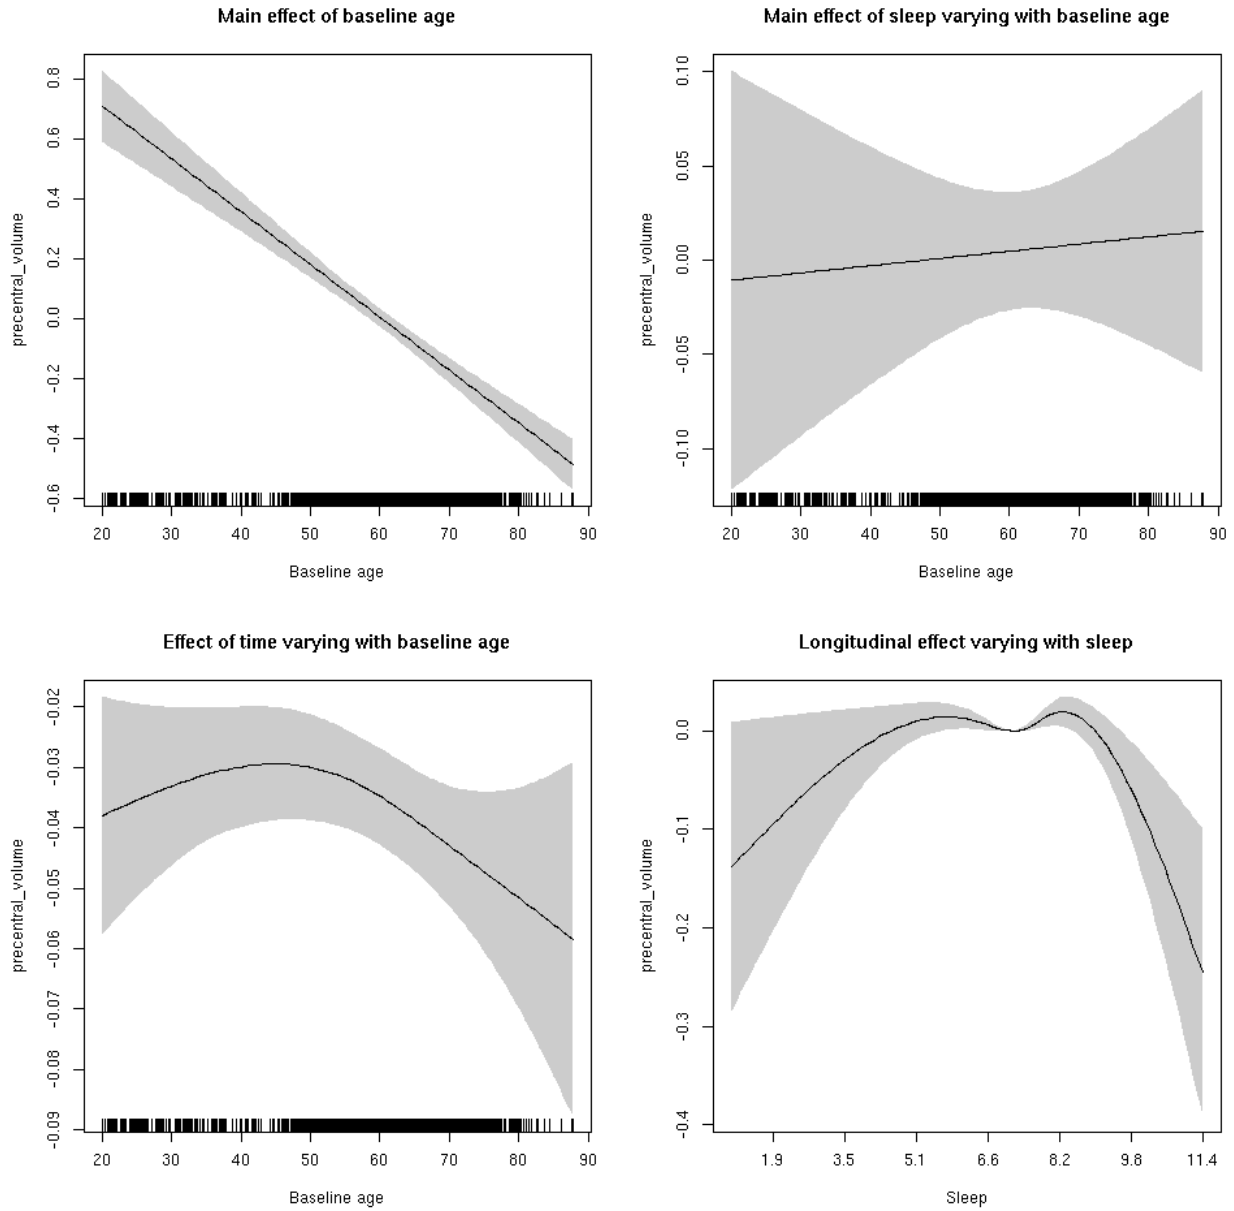

**Male: Full data** Below is the row for `s(sleep_z):time` from the model output.

```
## s(sleep_z):time  1.000  1.000  0.229  0.632
```

Below are plots of a plot of `s(bl_age)`, `s(bl_age):sleep_z`, `s(bl_age):time`, and `s(sleep_z):time`. For `s(sleep_z):time`, roughly, if we cannot fit a straight line through the confidence bands, there is evidence that the effect of time depends on sleep duration. It is correct that the confidence interval is zero at one point along the axis; this happens because we do not include the main effect.



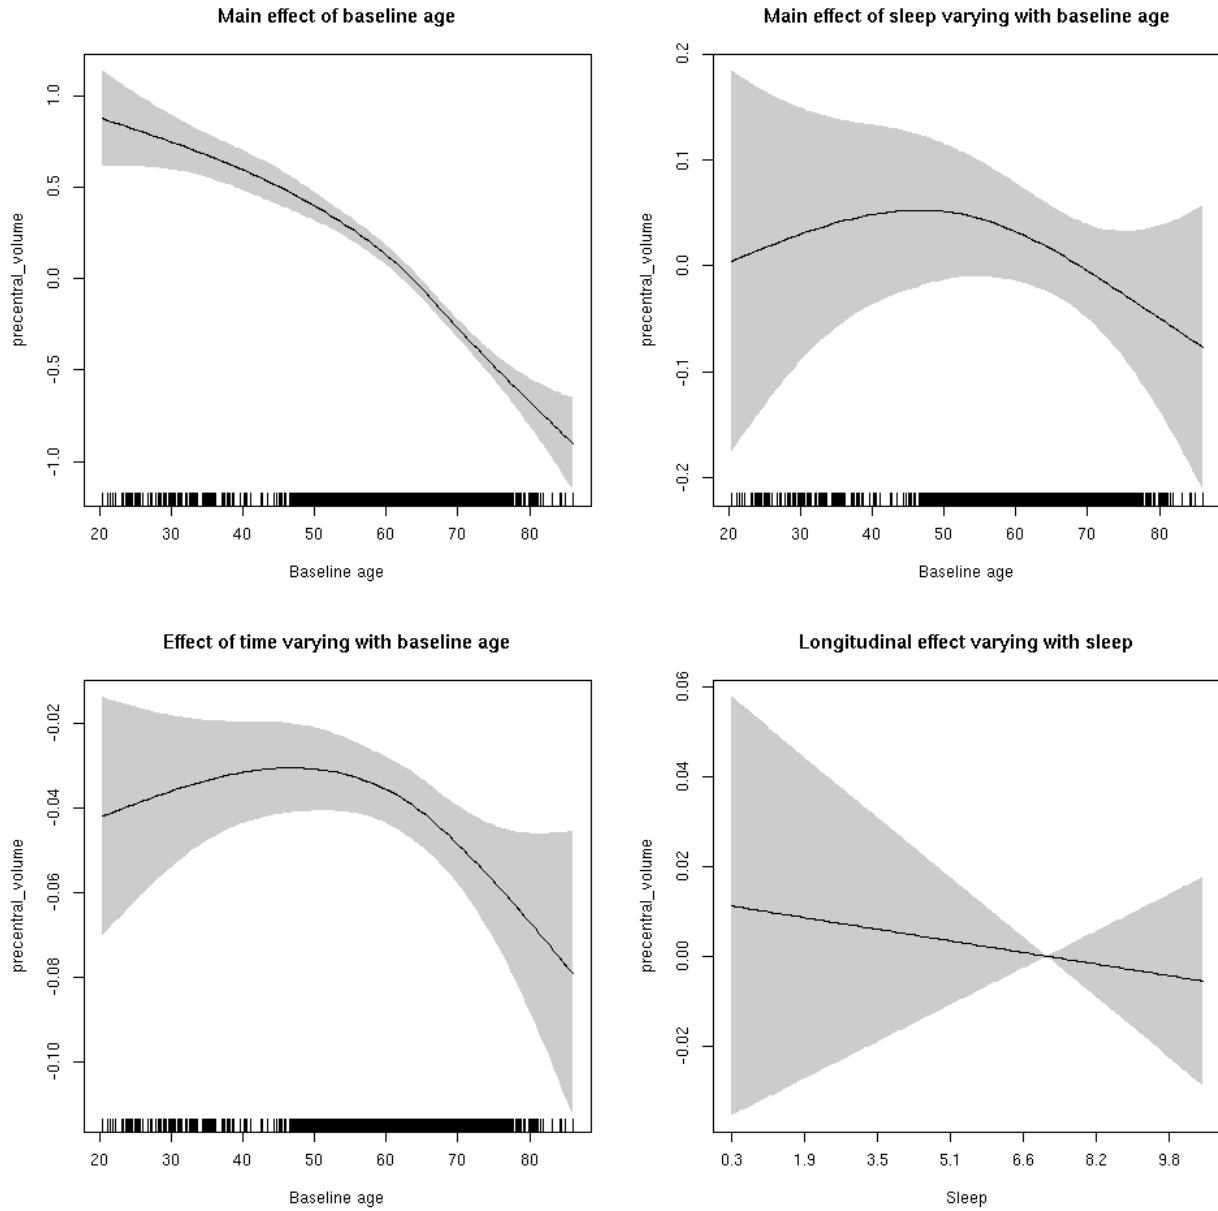

## precentral\_volume

**Full data** Below is the model output. The term `s(sleep_z):time` is probably what we care most about.

```
##
## Family: gaussian
## Link function: identity
##
## Formula:
## value ~ sex + site + icv + s(bl_age, k = 10, bs = "cr") + s(bl_age,
##   by = sleep_z, bs = "cr") + +s(bl_age, by = time, k = 5, bs = "cr") +
##   s(sleep_z, by = time, k = 5, bs = "cr", pc = 0)
## <environment: 0x5630035a74b8>
```

```

##
## Parametric coefficients:
##           Estimate Std. Error t value Pr(>|t|)
## (Intercept)  0.23678    0.05453   4.342 1.43e-05 ***
## sexmale      0.13572    0.02796   4.853 1.24e-06 ***
## siteousAvanto -1.17691    0.06698 -17.571 < 2e-16 ***
## siteousPrisma -0.57521    0.21078  -2.729 0.006368 **
## siteousSkyra  -0.79441    0.06485 -12.250 < 2e-16 ***
## siteUB       -0.44949    0.12447  -3.611 0.000306 ***
## siteUCAM     -0.67097    0.06779  -9.898 < 2e-16 ***
## siteUKB      -0.16369    0.05181  -3.159 0.001587 **
## siteUmU      -0.22556    0.07757  -2.908 0.003651 **
## icv          0.56513    0.01383  40.848 < 2e-16 ***
## ---
## Signif. codes:  0 '***' 0.001 '**' 0.01 '*' 0.05 '.' 0.1 ' ' 1
##
## Approximate significance of smooth terms:
##           edf Ref.df      F p-value
## s(bl_age)      4.015  4.015 122.003 <2e-16 ***
## s(bl_age):sleep_z 2.000  2.000   0.379   0.685
## s(bl_age):time  3.265  3.265  54.680 <2e-16 ***
## s(sleep_z):time  3.554  3.554   1.400   0.123
## ---
## Signif. codes:  0 '***' 0.001 '**' 0.01 '*' 0.05 '.' 0.1 ' ' 1
##
## R-sq.(adj) =  0.478
## lmer.REML = 12032  Scale est. = 0.069567  n = 8170

```

Below are plots of a plot of  $s(\text{bl\_age})$ ,  $s(\text{bl\_age}):\text{sleep\_z}$ ,  $s(\text{bl\_age}):\text{time}$ , and  $s(\text{sleep\_z}):\text{time}$ . For  $s(\text{sleep\_z}):\text{time}$ , roughly, if we cannot fit a straight line through the confidence bands, there is evidence that the effect of time depends on sleep duration. It is correct that the confidence interval is zero at one point along the axis; this happens because we do not include the main effect.

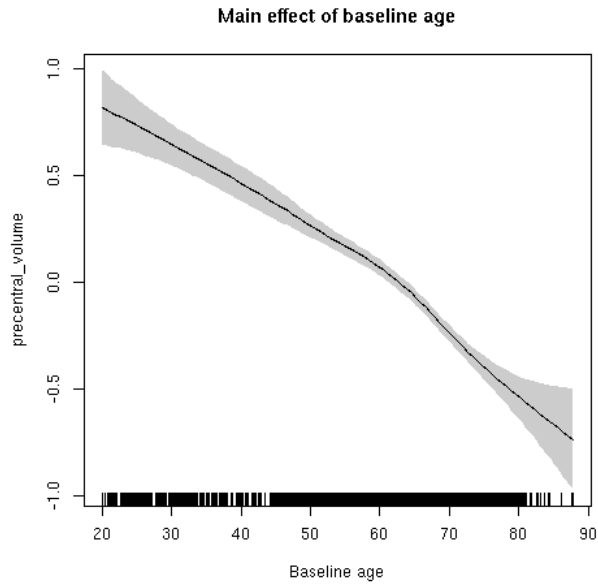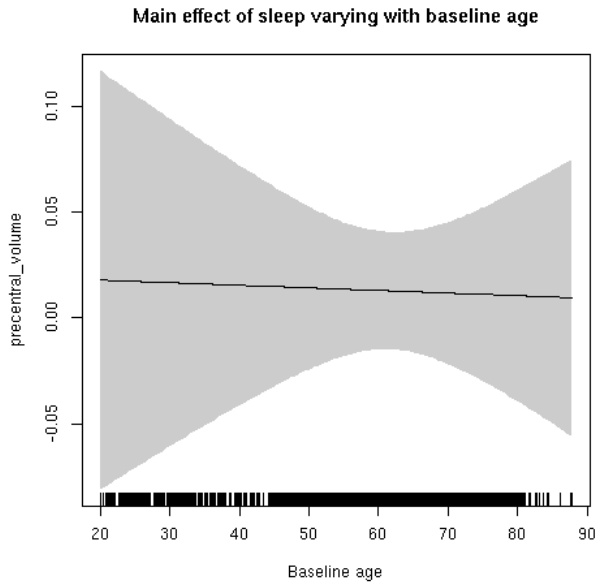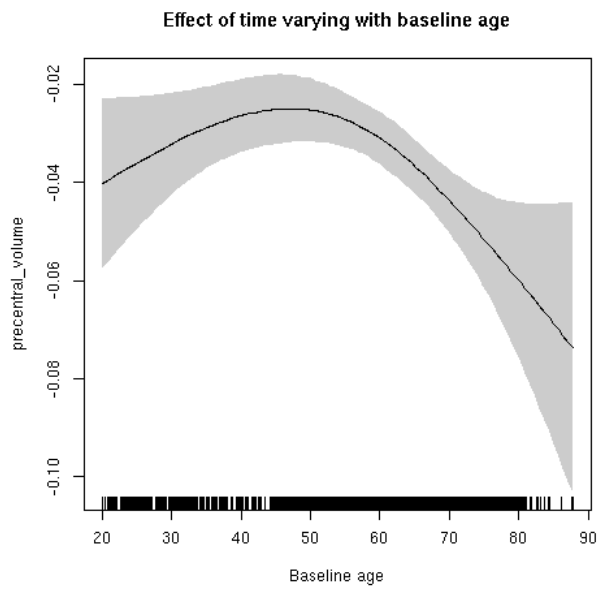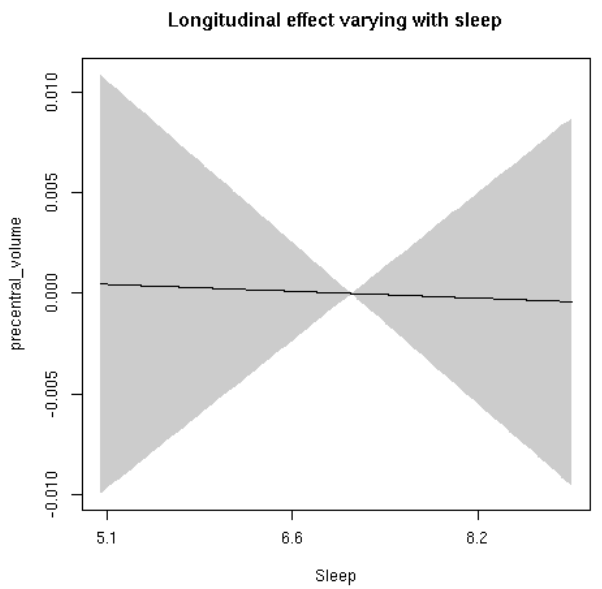

**Restricted to sleep  $\geq 5$  and  $\leq 9$  hours** Below is the row for `s(sleep_z):time` from the model output.

```
## s(sleep_z):time  1.000  1.000  0.008  0.929
```

Below are plots of a plot of `s(bl_age)`, `s(bl_age):sleep_z`, `s(bl_age):time`, and `s(sleep_z):time`. For `s(sleep_z):time`, roughly, if we cannot fit a straight line through the confidence bands, there is evidence that the effect of time depends on sleep duration. It is correct that the confidence interval is zero at one point along the axis; this happens because we do not include the main effect.

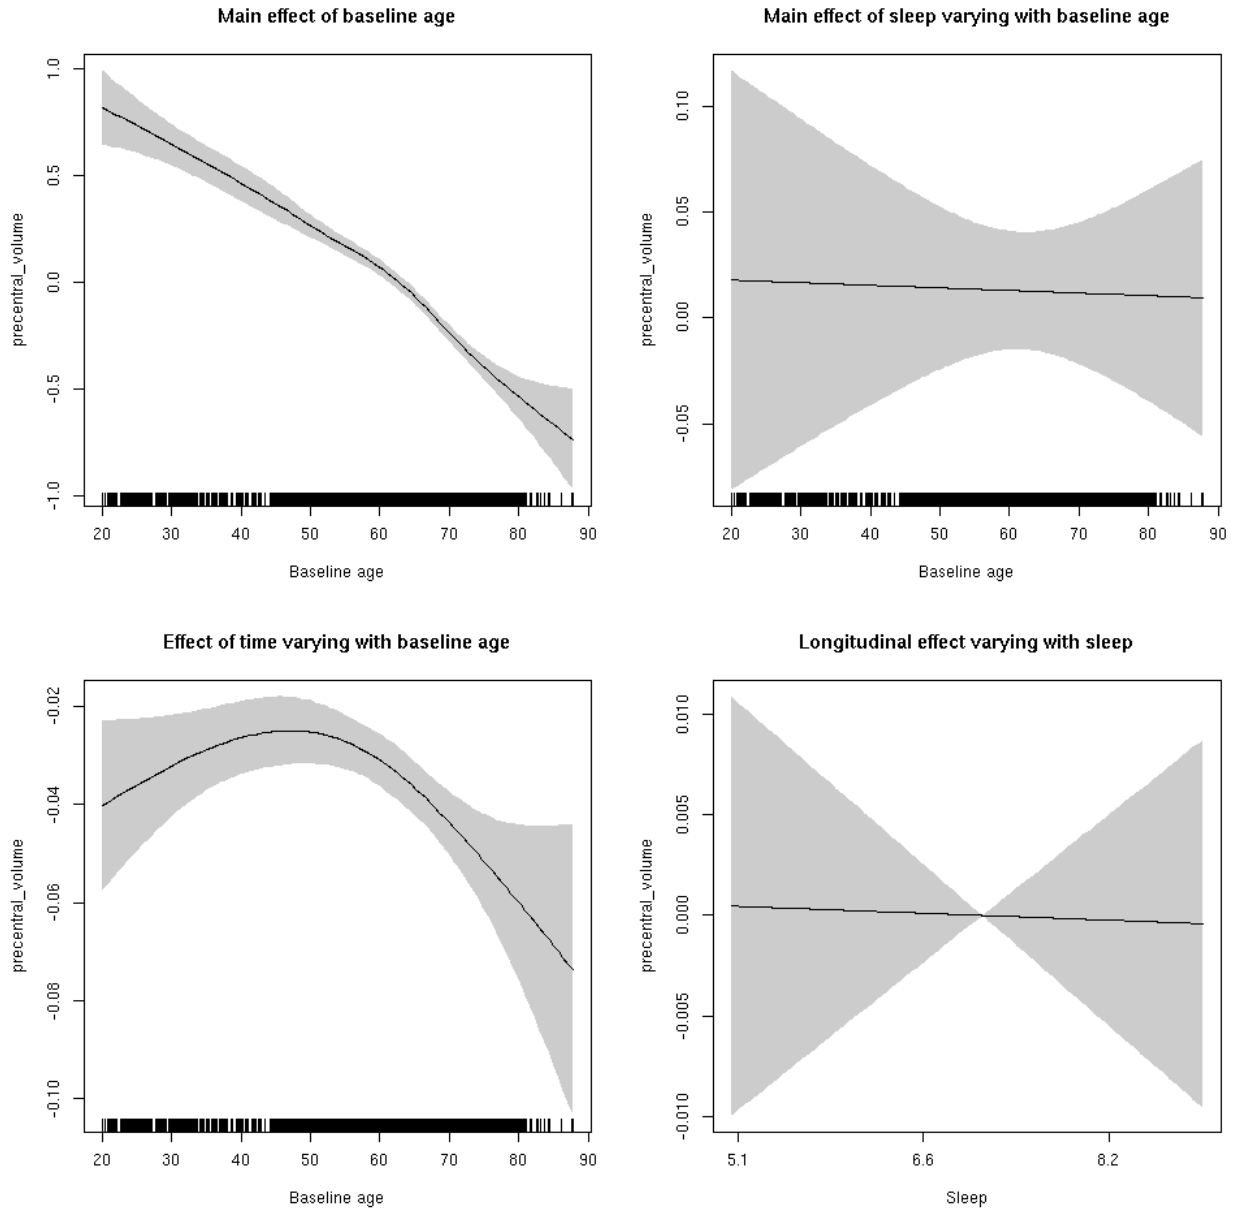

### precuneus\_area: Stratified by sex

**Female: Full data** Below is the row for `s(sleep_z):time` from the model output.

```
## s(sleep_z):time  1.000  1.000  0.002  0.962
```

Below are plots of a plot of `s(bl_age)`, `s(bl_age):sleep_z`, `s(bl_age):time`, and `s(sleep_z):time`. For `s(sleep_z):time`, roughly, if we cannot fit a straight line through the confidence bands, there is evidence that the effect of time depends on sleep duration. It is correct that the confidence interval is zero at one point along the axis; this happens because we do not include the main effect.

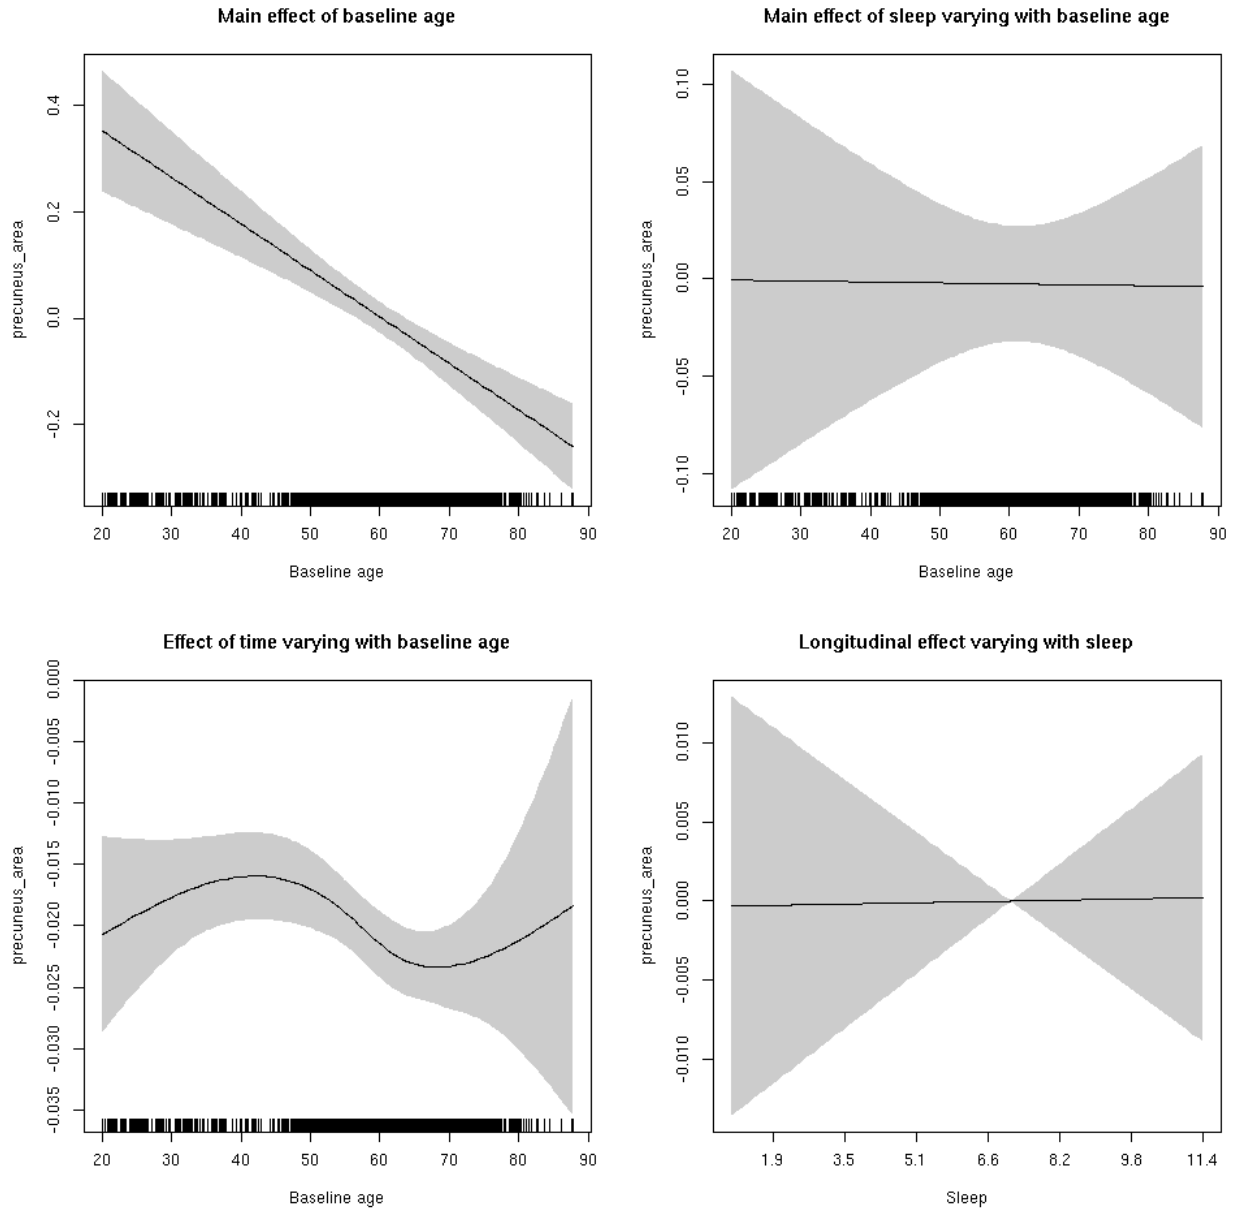

**Male: Full data** Below is the row for `s(sleep_z):time` from the model output.

```
## s(sleep_z):time  1.000  1.000  0.244  0.621
```

Below are plots of a plot of `s(bl_age)`, `s(bl_age):sleep_z`, `s(bl_age):time`, and `s(sleep_z):time`. For `s(sleep_z):time`, roughly, if we cannot fit a straight line through the confidence bands, there is evidence that the effect of time depends on sleep duration. It is correct that the confidence interval is zero at one point along the axis; this happens because we do not include the main effect.

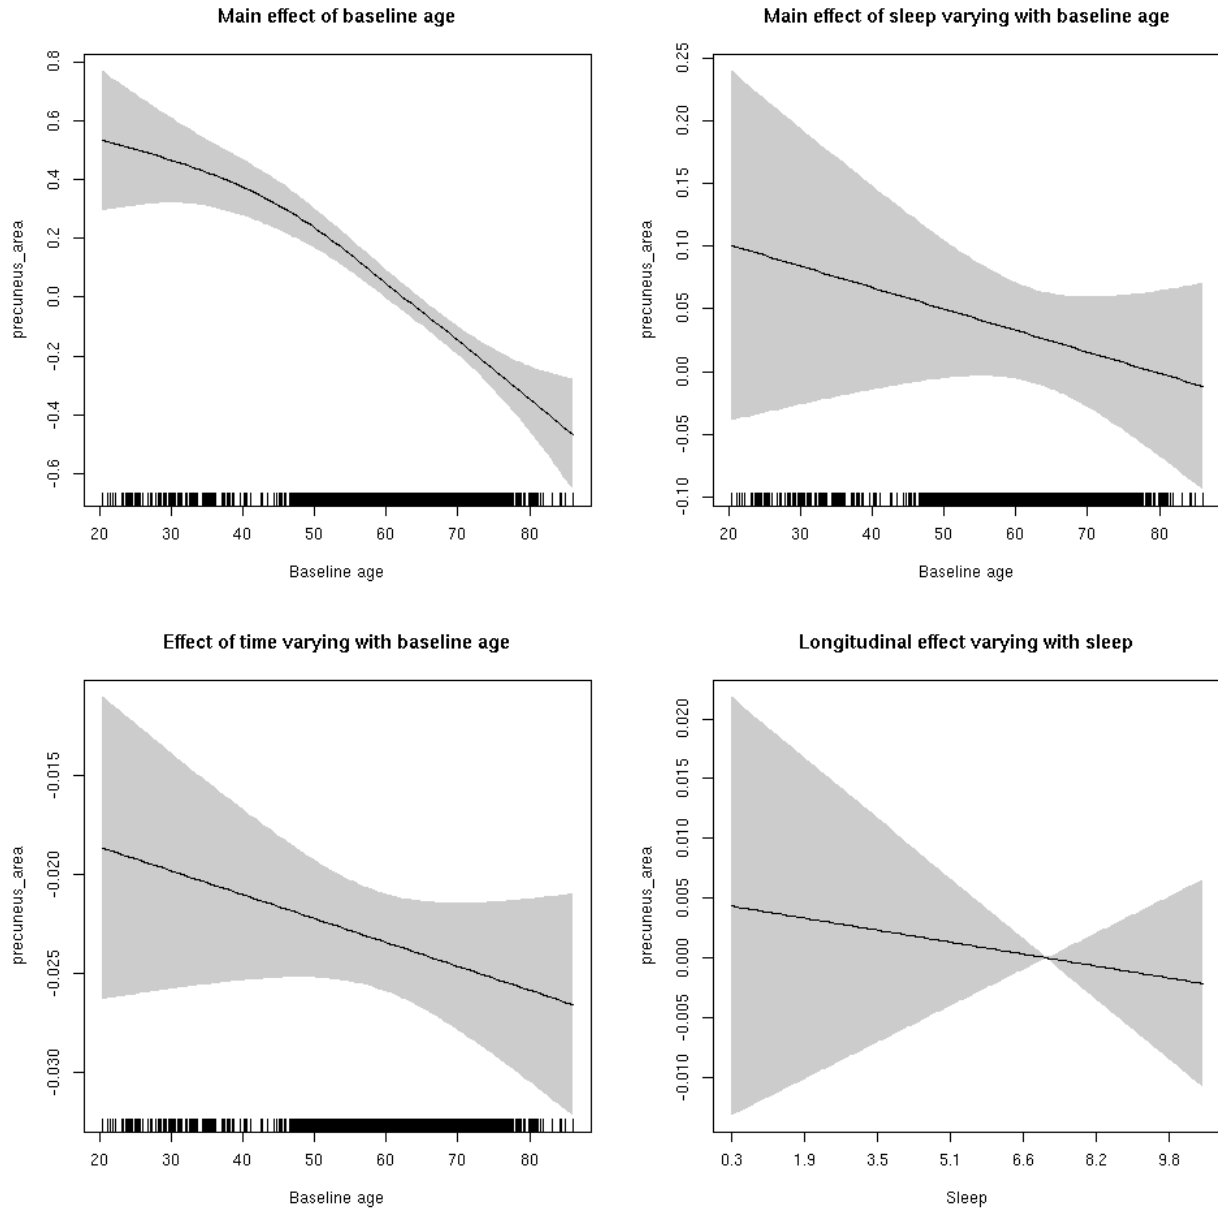

## precuneus\_area

**Full data** Below is the model output. The term `s(sleep_z):time` is probably what we care most about.

```
##
## Family: gaussian
## Link function: identity
##
## Formula:
## value ~ sex + site + icv + s(bl_age, k = 10, bs = "cr") + s(bl_age,
##   by = sleep_z, bs = "cr") + +s(bl_age, by = time, k = 5, bs = "cr") +
##   s(sleep_z, by = time, k = 5, bs = "cr", pc = 0)
## <environment: 0x5630035b2808>
```

```

##
## Parametric coefficients:
##           Estimate Std. Error t value Pr(>|t|)
## (Intercept)  0.64311    0.05316  12.098 < 2e-16 ***
## sexmale      0.17077    0.02760   6.188 6.40e-10 ***
## siteousAvanto -0.81762    0.06534 -12.513 < 2e-16 ***
## siteousPrisma -0.76171    0.10210  -7.461 9.50e-14 ***
## siteousSkyra  -0.32531    0.06337  -5.133 2.91e-07 ***
## siteUB       -0.68707    0.12500  -5.497 3.99e-08 ***
## siteUCAM     -0.76422    0.06649 -11.494 < 2e-16 ***
## siteUKB      -0.69782    0.04979 -14.014 < 2e-16 ***
## siteUmU      -0.21071    0.07691  -2.740 0.00617 **
## icv          0.60946    0.01325  46.008 < 2e-16 ***
## ---
## Signif. codes:  0 '***' 0.001 '**' 0.01 '*' 0.05 '.' 0.1 ' ' 1
##
## Approximate significance of smooth terms:
##           edf Ref.df      F p-value
## s(bl_age)      1.128  1.128 121.930 <2e-16 ***
## s(bl_age):sleep_z 2.000  2.000   0.583   0.558
## s(bl_age):time  2.000  2.000 380.140 <2e-16 ***
## s(sleep_z):time  1.000  1.000   0.345   0.557
## ---
## Signif. codes:  0 '***' 0.001 '**' 0.01 '*' 0.05 '.' 0.1 ' ' 1
##
## R-sq.(adj) =  0.491
## lmer.REML = 3650.2  Scale est. = 0.0098032  n = 8155

```

Below are plots of a plot of  $s(\text{bl\_age})$ ,  $s(\text{bl\_age}):\text{sleep\_z}$ ,  $s(\text{bl\_age}):\text{time}$ , and  $s(\text{sleep\_z}):\text{time}$ . For  $s(\text{sleep\_z}):\text{time}$ , roughly, if we cannot fit a straight line through the confidence bands, there is evidence that the effect of time depends on sleep duration. It is correct that the confidence interval is zero at one point along the axis; this happens because we do not include the main effect.

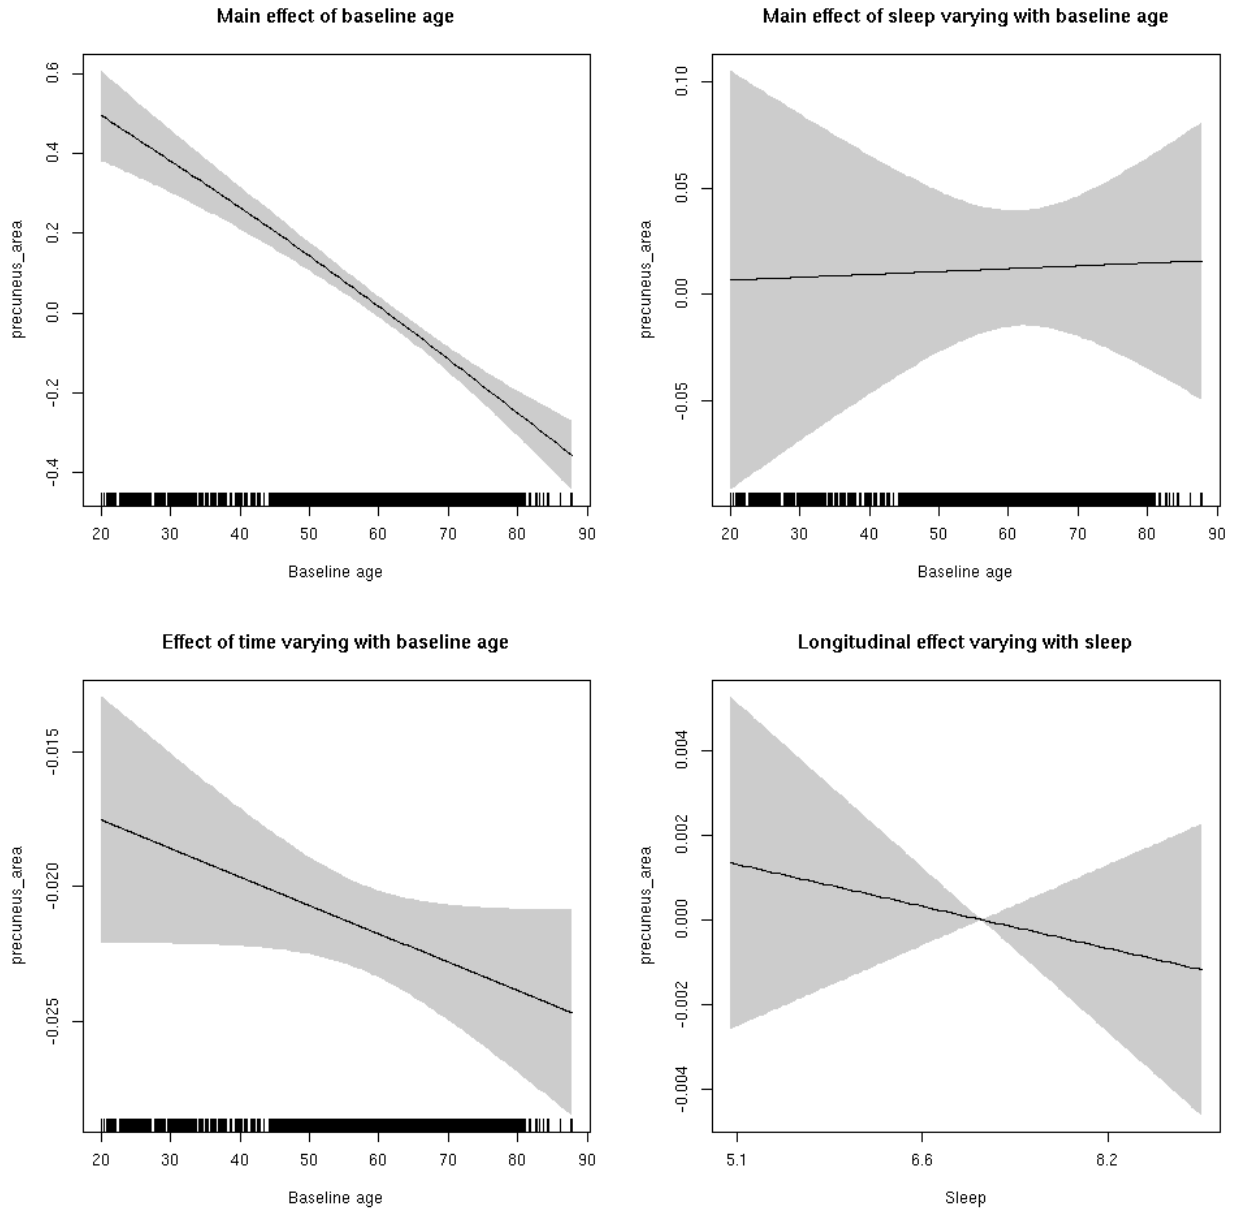

**Restricted to sleep  $\geq 5$  and  $\leq 9$  hours** Below is the row for `s(sleep_z):time` from the model output.

```
## s(sleep_z):time  1.000  1.000  0.470  0.493
```

Below are plots of a plot of `s(bl_age)`, `s(bl_age):sleep_z`, `s(bl_age):time`, and `s(sleep_z):time`. For `s(sleep_z):time`, roughly, if we cannot fit a straight line through the confidence bands, there is evidence that the effect of time depends on sleep duration. It is correct that the confidence interval is zero at one point along the axis; this happens because we do not include the main effect.



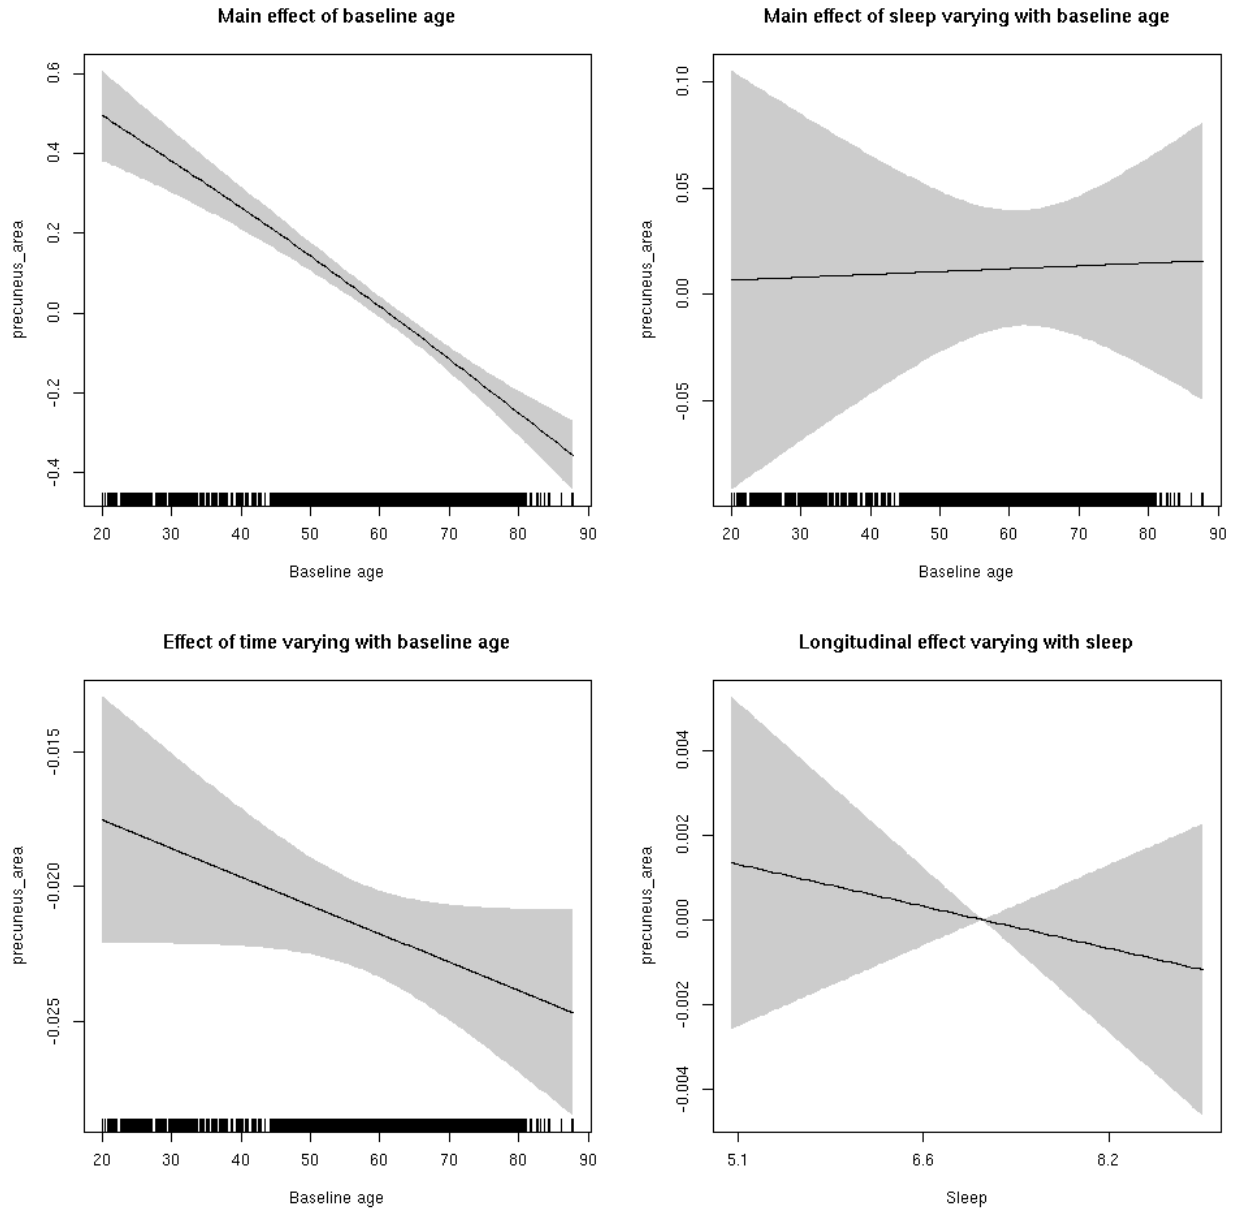

**precuneus\_thickness: Stratified by sex**

**Female: Full data** Below is the row for `s(sleep_z):time` from the model output.

```
## s(sleep_z):time  1.000  1.000  0.01  0.919
```

Below are plots of a plot of `s(bl_age)`, `s(bl_age):sleep_z`, `s(bl_age):time`, and `s(sleep_z):time`. For `s(sleep_z):time`, roughly, if we cannot fit a straight line through the confidence bands, there is evidence that the effect of time depends on sleep duration. It is correct that the confidence interval is zero at one point along the axis; this happens because we do not include the main effect.

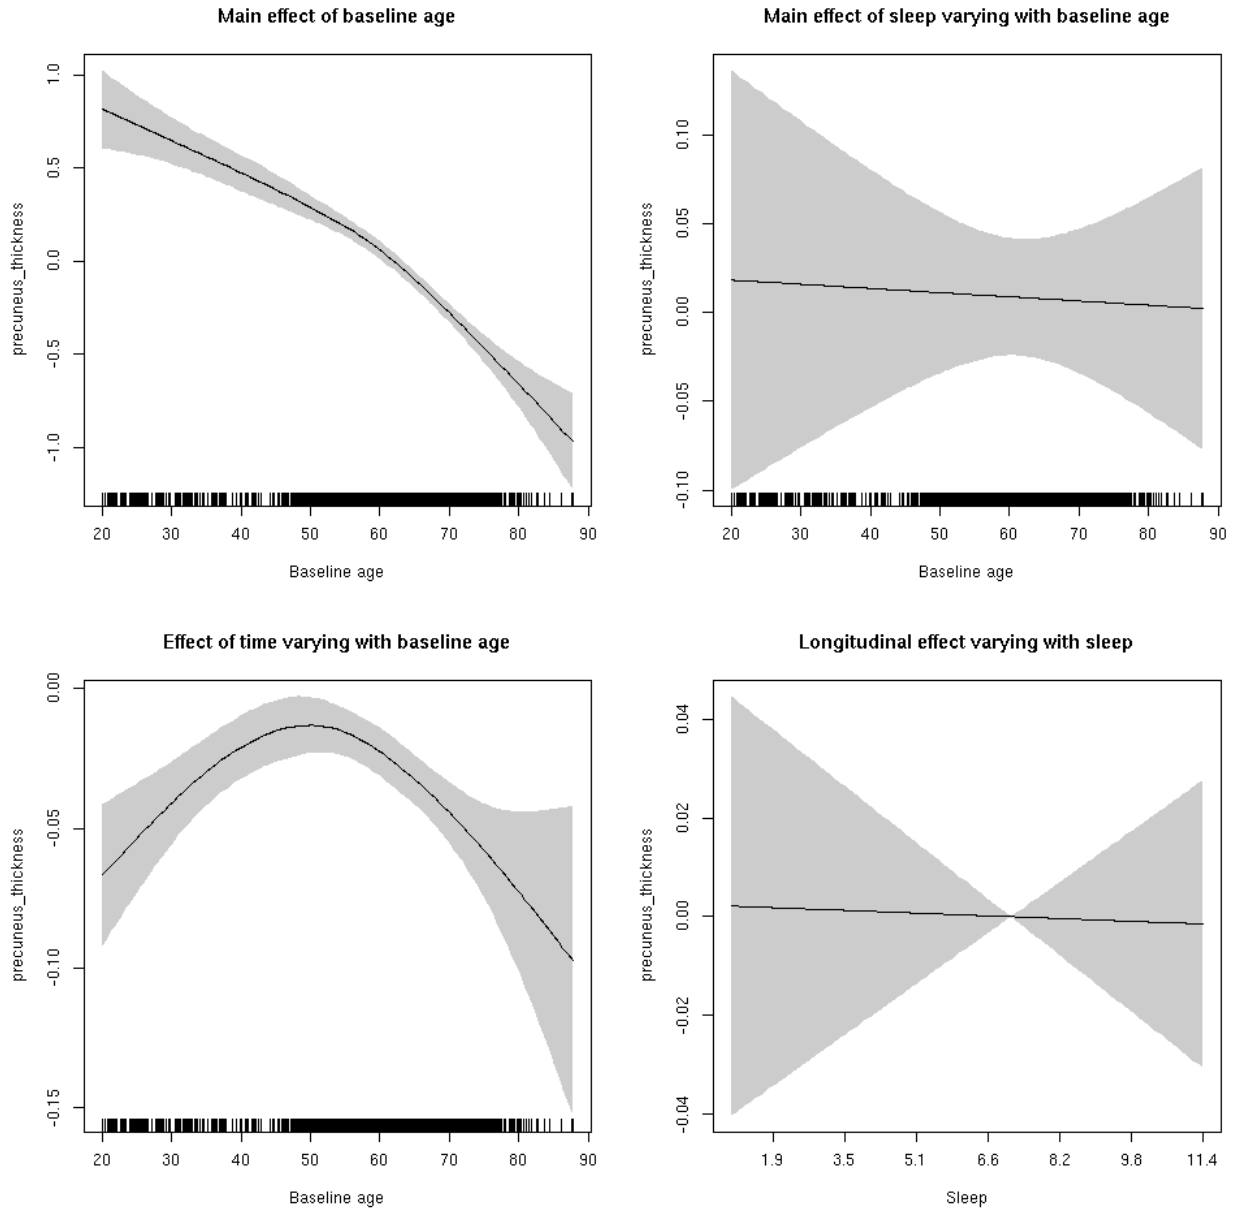

**Male: Full data** Below is the row for `s(sleep_z):time` from the model output.

```
## s(sleep_z):time  1.000  1.000  0.437  0.509
```

Below are plots of a plot of `s(bl_age)`, `s(bl_age):sleep_z`, `s(bl_age):time`, and `s(sleep_z):time`. For `s(sleep_z):time`, roughly, if we cannot fit a straight line through the confidence bands, there is evidence that the effect of time depends on sleep duration. It is correct that the confidence interval is zero at one point along the axis; this happens because we do not include the main effect.

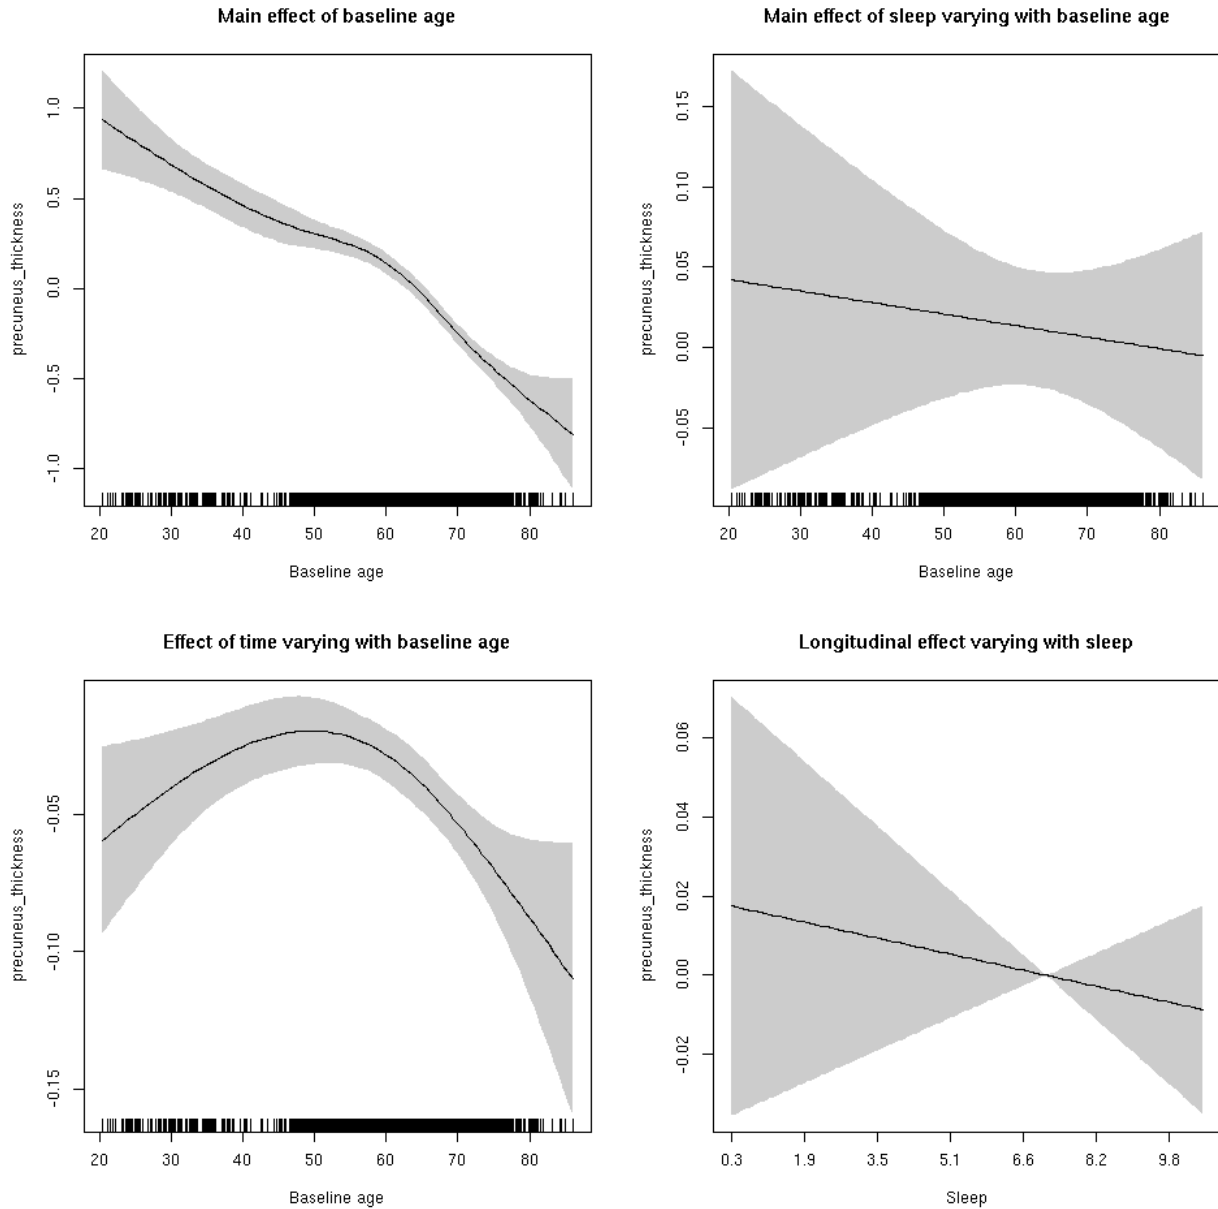

## precuneus\_thickness

**Full data** Below is the model output. The term `s(sleep_z):time` is probably what we care most about.

```
##
## Family: gaussian
## Link function: identity
##
## Formula:
## value ~ sex + site + s(bl_age, k = 10, bs = "cr") + s(bl_age,
##   by = sleep_z, bs = "cr") + +s(bl_age, by = time, k = 5, bs = "cr") +
##   s(sleep_z, by = time, k = 5, bs = "cr", pc = 0)
## <environment: 0x5630035dc850>
```

```

##
## Parametric coefficients:
##           Estimate Std. Error t value Pr(>|t|)
## (Intercept) -1.65885    0.04605 -36.022 < 2e-16 ***
## sexmale     -0.01686    0.02309  -0.730 0.465350
## siteousAvanto -0.09729    0.06091  -1.597 0.110237
## siteousPrisma  0.35468    0.23909   1.483 0.137993
## siteousSkyra   0.04219    0.06089   0.693 0.488389
## siteUB        0.44062    0.12254   3.596 0.000325 ***
## siteUCAM      0.41549    0.06343   6.550 6.1e-11 ***
## siteUKB       1.93211    0.04672  41.359 < 2e-16 ***
## siteUmU       0.27052    0.07590   3.564 0.000367 ***
## ---
## Signif. codes:  0 '***' 0.001 '**' 0.01 '*' 0.05 '.' 0.1 ' ' 1
##
## Approximate significance of smooth terms:
##           edf Ref.df      F p-value
## s(bl_age)      3.831  3.831 163.975 <2e-16 ***
## s(bl_age):sleep_z 2.000  2.000   0.429   0.651
## s(bl_age):time  3.835  3.835  42.729 <2e-16 ***
## s(sleep_z):time  2.887  2.887   2.269   0.116
## ---
## Signif. codes:  0 '***' 0.001 '**' 0.01 '*' 0.05 '.' 0.1 ' ' 1
##
## R-sq.(adj) =  0.579
## lmer.REML = 13373  Scale est. = 0.095679  n = 8170

```

Below are plots of a plot of `s(bl_age)`, `s(bl_age):sleep_z`, `s(bl_age):time`, and `s(sleep_z):time`. For `s(sleep_z):time`, roughly, if we cannot fit a straight line through the confidence bands, there is evidence that the effect of time depends on sleep duration. It is correct that the confidence interval is zero at one point along the axis; this happens because we do not include the main effect.

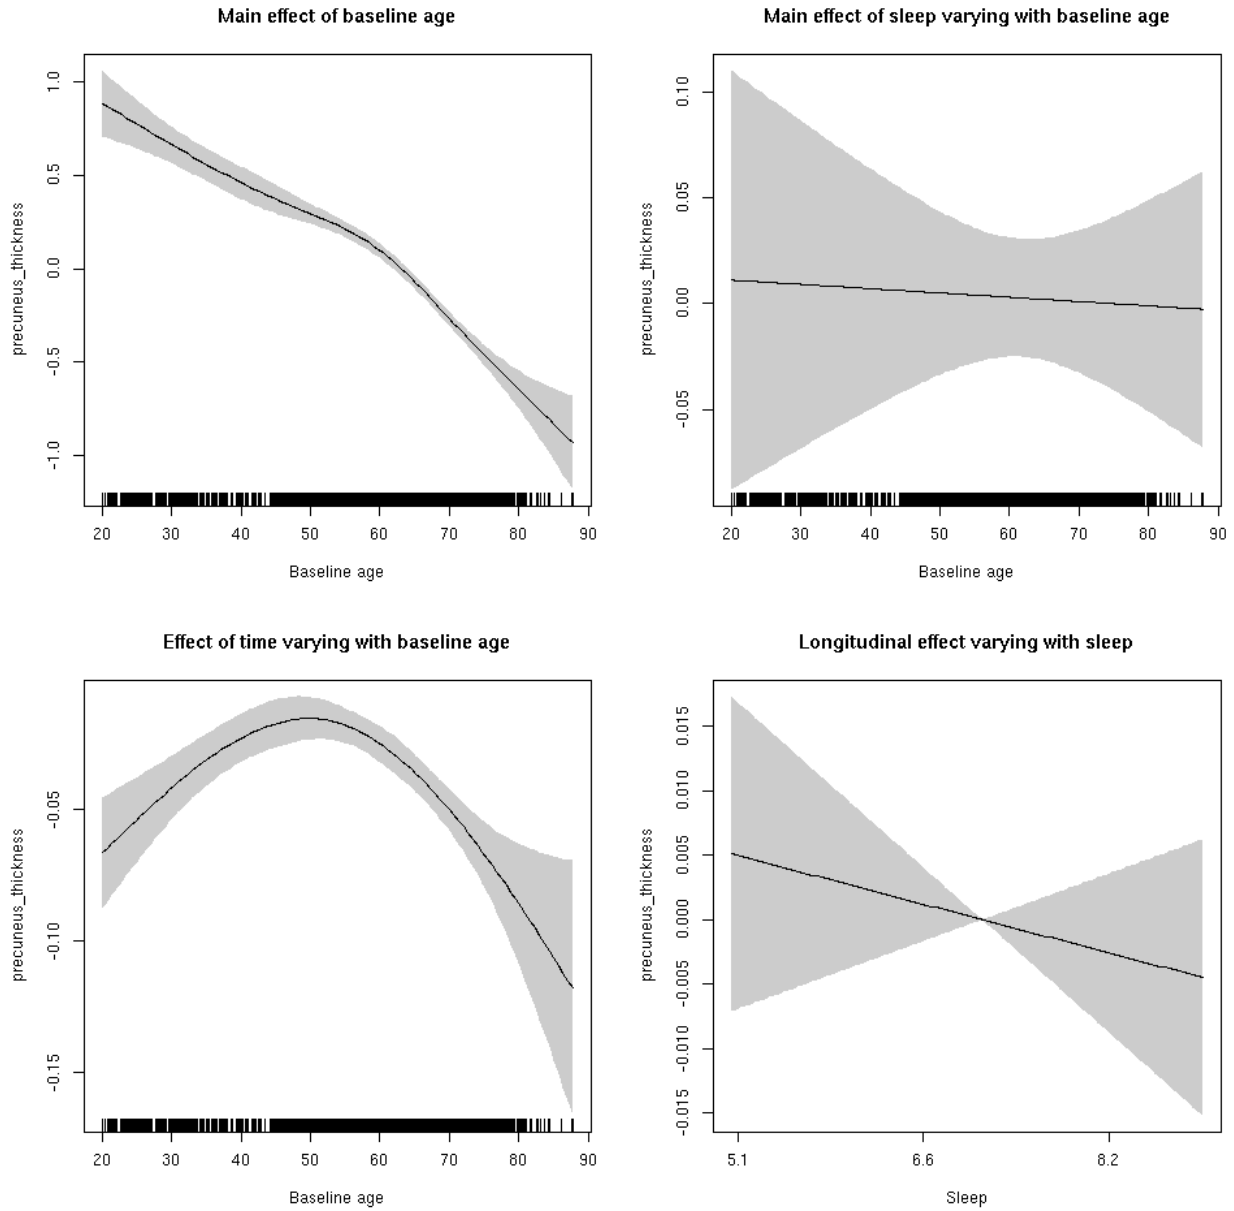

**Restricted to sleep  $\geq 5$  and  $\leq 9$  hours** Below is the row for `s(sleep_z):time` from the model output.

```
## s(sleep_z):time  1.000  1.000  0.701  0.403
```

Below are plots of a plot of `s(bl_age)`, `s(bl_age):sleep_z`, `s(bl_age):time`, and `s(sleep_z):time`. For `s(sleep_z):time`, roughly, if we cannot fit a straight line through the confidence bands, there is evidence that the effect of time depends on sleep duration. It is correct that the confidence interval is zero at one point along the axis; this happens because we do not include the main effect.



## precuneus\_volume: Stratified by sex

**Female: Full data** Below is the row for `s(sleep_z):time` from the model output.

```
## s(sleep_z):time  1.000  1.000  0.047  0.828
```

Below are plots of a plot of `s(bl_age)`, `s(bl_age):sleep_z`, `s(bl_age):time`, and `s(sleep_z):time`. For `s(sleep_z):time`, roughly, if we cannot fit a straight line through the confidence bands, there is evidence that the effect of time depends on sleep duration. It is correct that the confidence interval is zero at one point along the axis; this happens because we do not include the main effect.

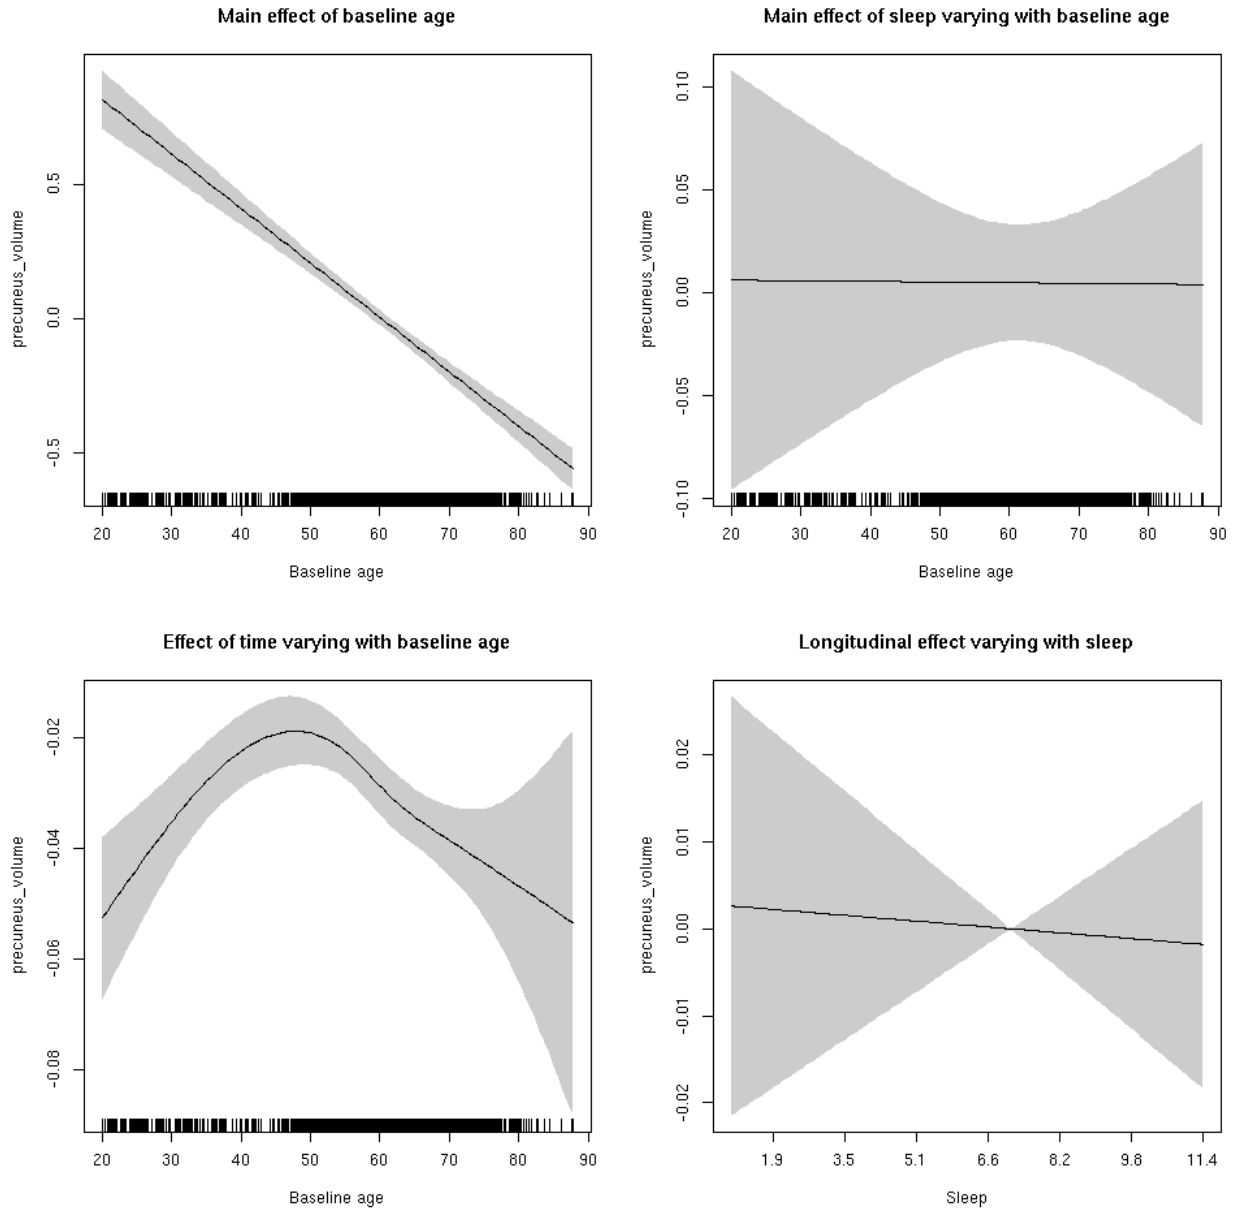

**Male: Full data** Below is the row for `s(sleep_z):time` from the model output.

```
## s(sleep_z):time  1.000  1.000  0.741  0.3894
```

Below are plots of a plot of `s(bl_age)`, `s(bl_age):sleep_z`, `s(bl_age):time`, and `s(sleep_z):time`. For `s(sleep_z):time`, roughly, if we cannot fit a straight line through the confidence bands, there is evidence that the effect of time depends on sleep duration. It is correct that confidence interval is zero at one point along the axis; this happens because we do not include the main effect.

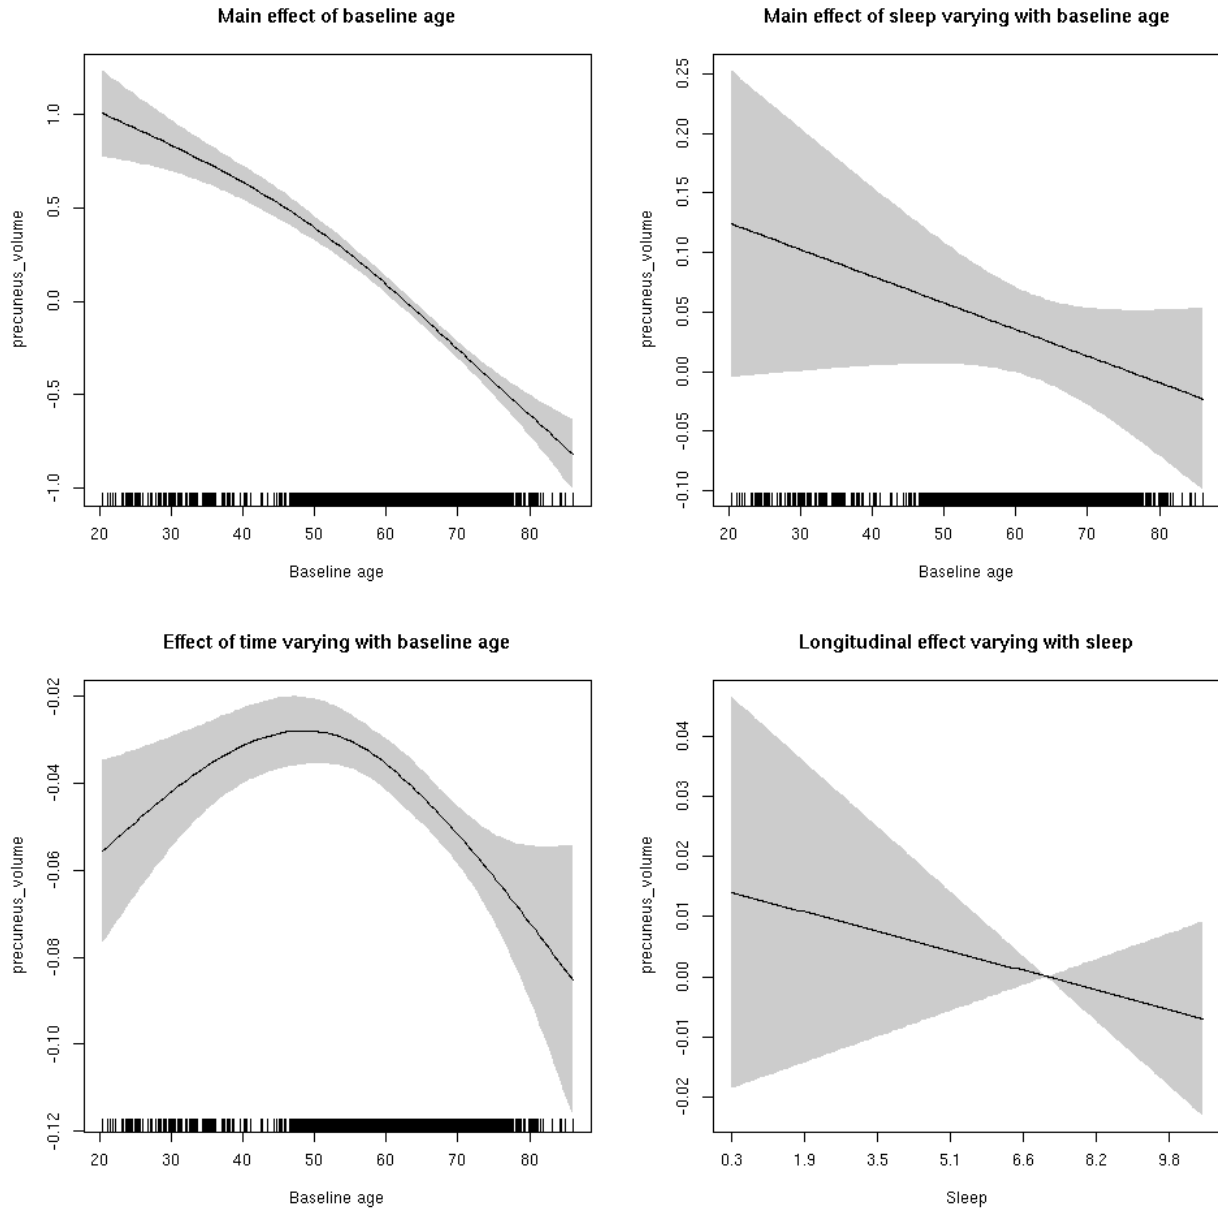

## precuneus\_volume

**Full data** Below is the model output. The term `s(sleep_z):time` is probably what we care most about.

```
##
## Family: gaussian
## Link function: identity
##
## Formula:
## value ~ sex + site + icv + s(bl_age, k = 10, bs = "cr") + s(bl_age,
##   by = sleep_z, bs = "cr") + +s(bl_age, by = time, k = 5, bs = "cr") +
##   s(sleep_z, by = time, k = 5, bs = "cr", pc = 0)
## <environment: 0x5630035b4d48>
```



```

##
## Parametric coefficients:
##           Estimate Std. Error t value Pr(>|t|)
## (Intercept) -0.08801    0.05079  -1.733 0.083169 .
## sexmale      0.09852    0.02614   3.769 0.000165 ***
## siteousAvanto -0.93313    0.06211 -15.023 < 2e-16 ***
## siteousPrisma -0.63237    0.15308  -4.131 3.65e-05 ***
## siteousSkyra  -0.26754    0.06014  -4.449 8.75e-06 ***
## siteUB        -0.42637    0.11689  -3.648 0.000266 ***
## siteUCAM      -0.58089    0.06284  -9.244 < 2e-16 ***
## siteUKB       0.19784    0.04809   4.114 3.93e-05 ***
## siteUmU       -0.09230    0.07247  -1.274 0.202855
## icv           0.61257    0.01287  47.588 < 2e-16 ***
## ---
## Signif. codes:  0 '***' 0.001 '**' 0.01 '*' 0.05 '.' 0.1 ' ' 1
##
## Approximate significance of smooth terms:
##           edf Ref.df      F p-value
## s(bl_age)      2.480  2.480 242.279 <2e-16 ***
## s(bl_age):sleep_z 2.000  2.000   1.590   0.204
## s(bl_age):time  3.917  3.917 168.874 <2e-16 ***
## s(sleep_z):time  1.000  1.000   0.717   0.397
## ---
## Signif. codes:  0 '***' 0.001 '**' 0.01 '*' 0.05 '.' 0.1 ' ' 1
##
## R-sq.(adj) =  0.575
## lmer.REML = 8338.9  Scale est. = 0.033091  n = 8167

```

Below are plots of a plot of `s(bl_age)`, `s(bl_age):sleep_z`, `s(bl_age):time`, and `s(sleep_z):time`. For `s(sleep_z):time`, roughly, if we cannot fit a straight line through the confidence bands, there is evidence that the effect of time depends on sleep duration. It is correct that the confidence interval is zero at one point along the axis; this happens because we do not include the main effect.

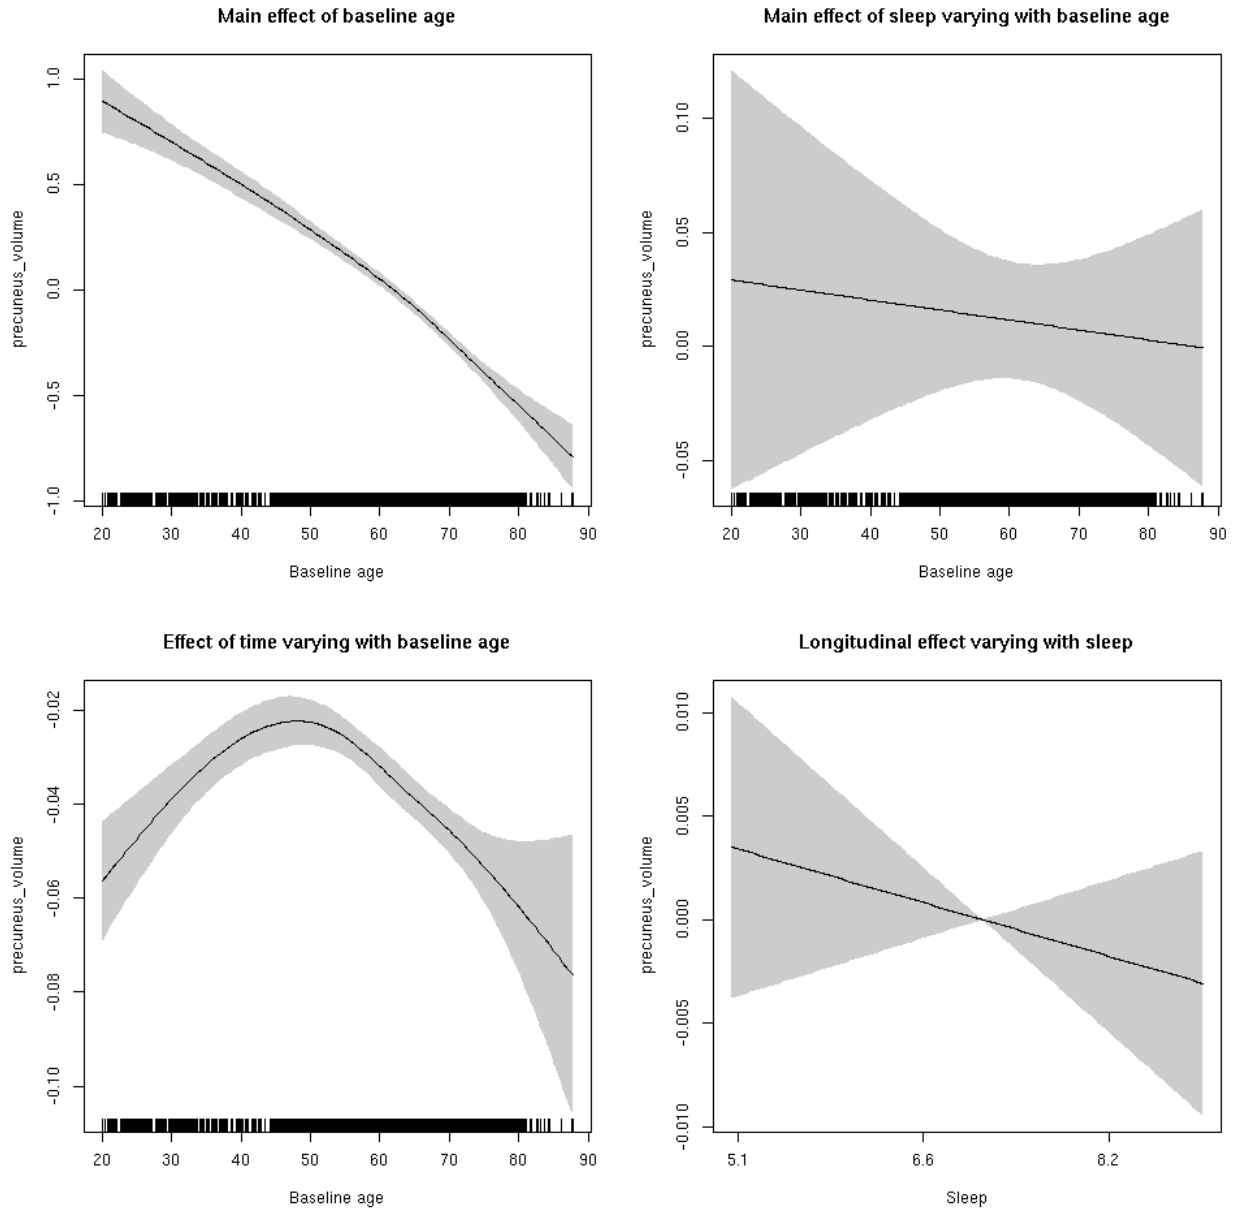

**Restricted to sleep  $\geq 5$  and  $\leq 9$  hours** Below is the row for `s(sleep_z):time` from the model output.

```
## s(sleep_z):time  1.000  1.000  0.923  0.337
```

Below are plots of a plot of `s(bl_age)`, `s(bl_age):sleep_z`, `s(bl_age):time`, and `s(sleep_z):time`. For `s(sleep_z):time`, roughly, if we cannot fit a straight line through the confidence bands, there is evidence that the effect of time depends on sleep duration. It is correct that the confidence interval is zero at one point along the axis; this happens because we do not include the main effect.

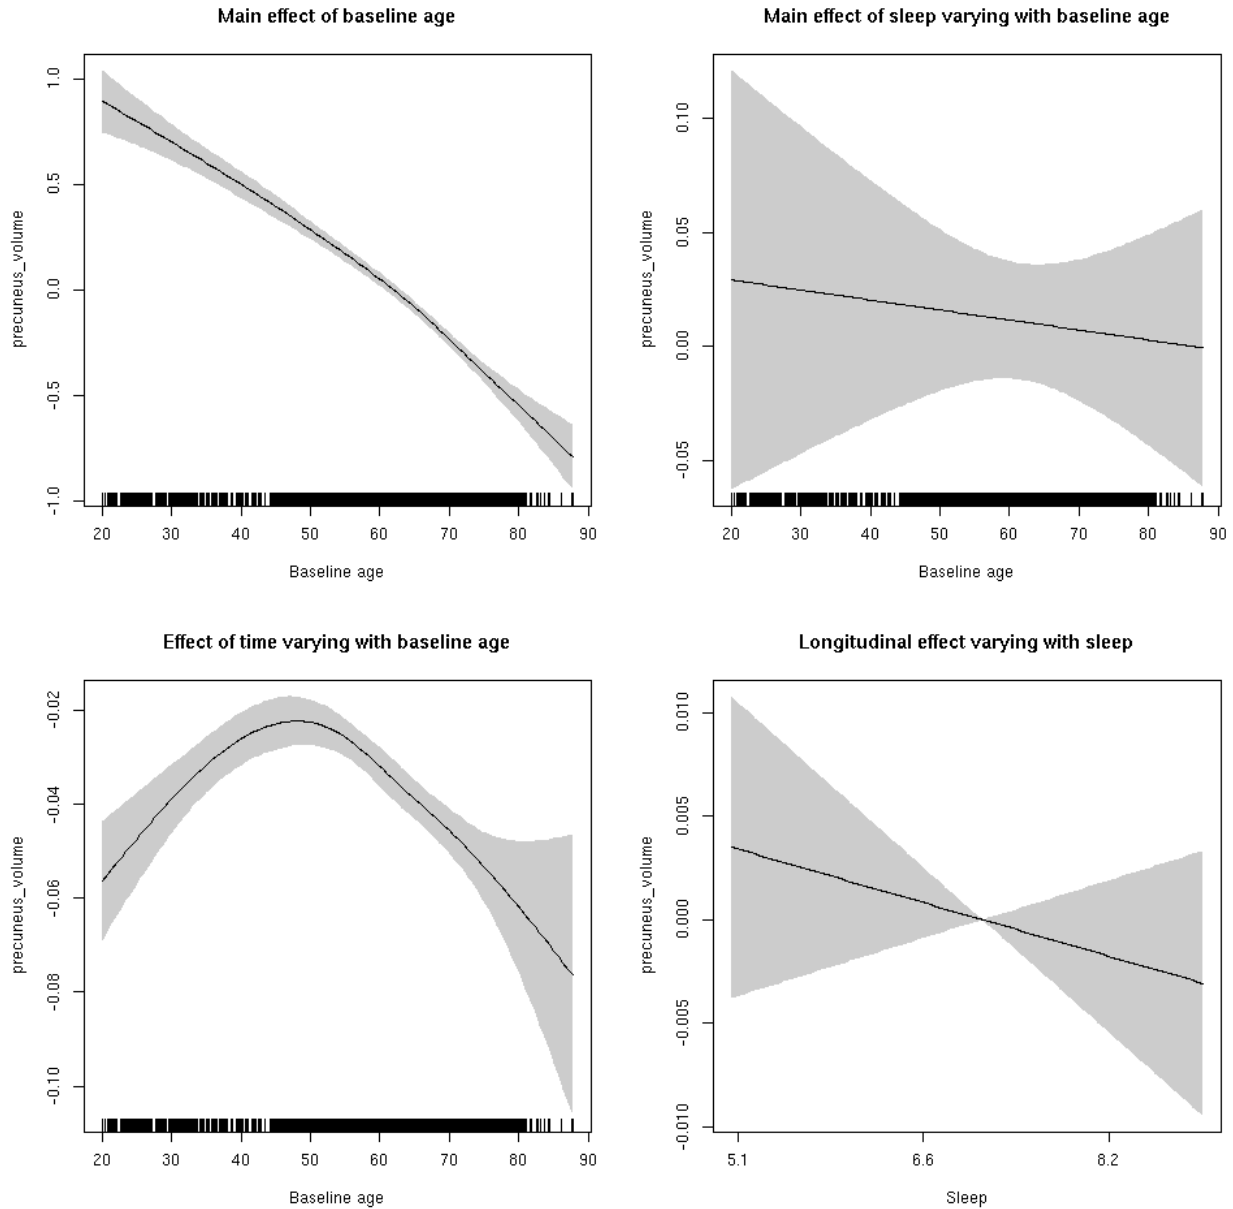

### rostralanteriorcingulate\_area: Stratified by sex

**Female: Full data** Below is the row for `s(sleep_z):time` from the model output.

```
## s(sleep_z):time  1.000  1.000  0.602  0.437819
```

Below are plots of a plot of `s(bl_age)`, `s(bl_age):sleep_z`, `s(bl_age):time`, and `s(sleep_z):time`. For `s(sleep_z):time`, roughly, if we cannot fit a straight line through the confidence bands, there is evidence that the effect of time depends on sleep duration. It is correct that the confidence interval is zero at one point along the axis; this happens because we do not include the main effect.

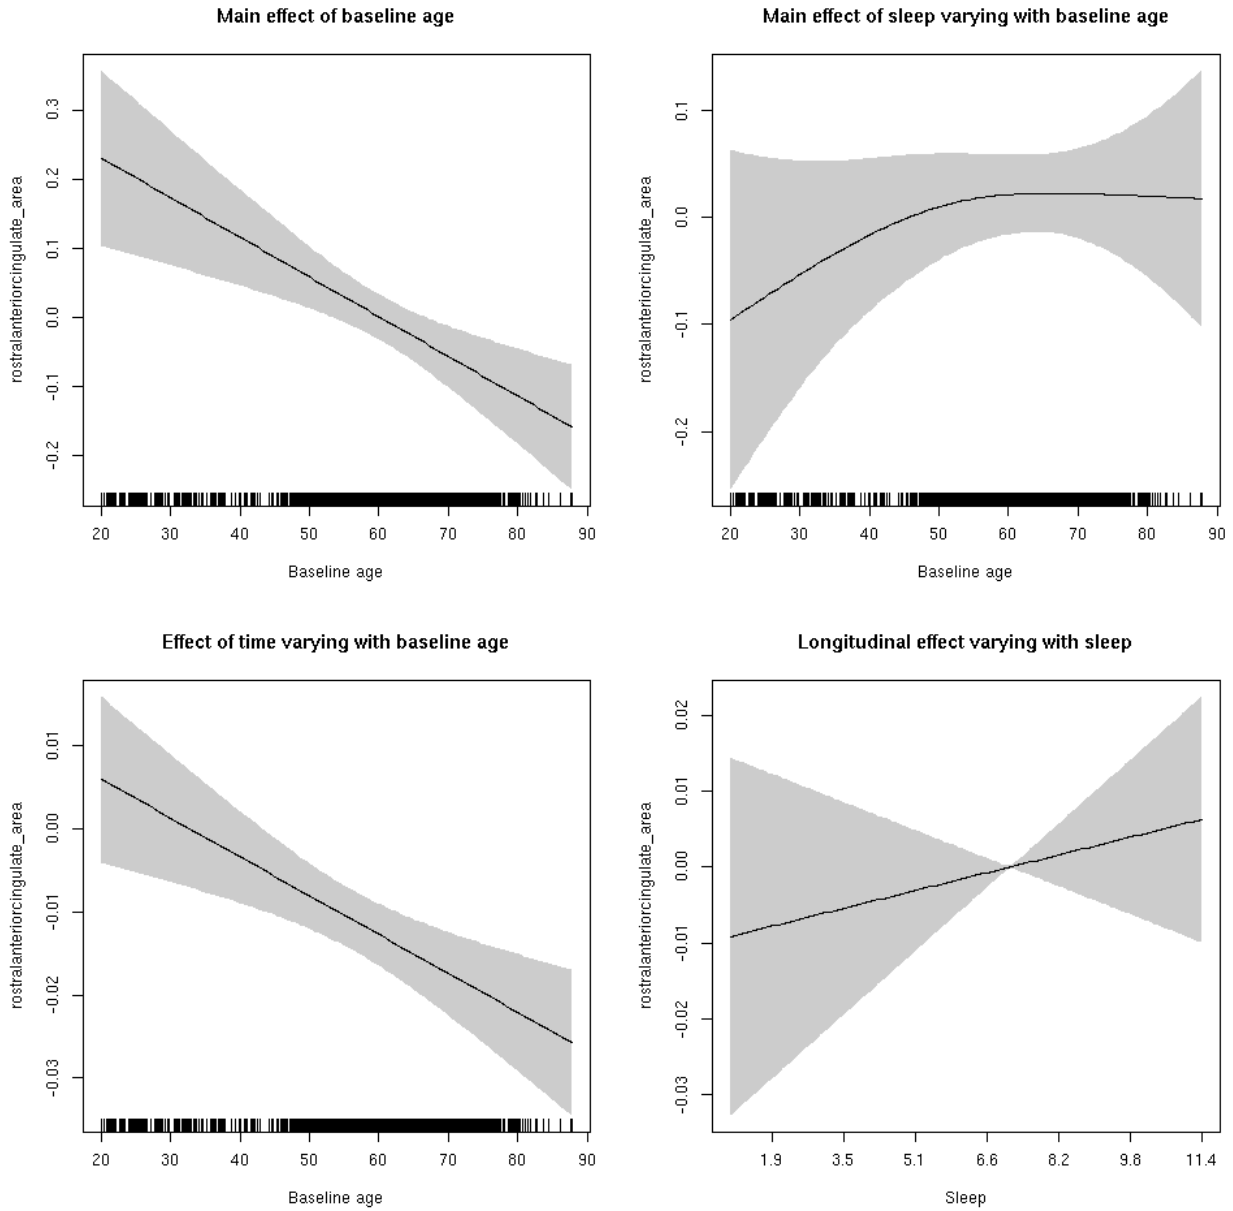

**Male: Full data** Below is the row for `s(sleep_z):time` from the model output.

```
## s(sleep_z):time  1.000  1.000  0.026  0.873
```

Below are plots of a plot of `s(bl_age)`, `s(bl_age):sleep_z`, `s(bl_age):time`, and `s(sleep_z):time`. For `s(sleep_z):time`, roughly, if we cannot fit a straight line through the confidence bands, there is evidence that the effect of time depends on sleep duration. It is correct that the confidence interval is zero at one point along the axis; this happens because we do not include the main effect.

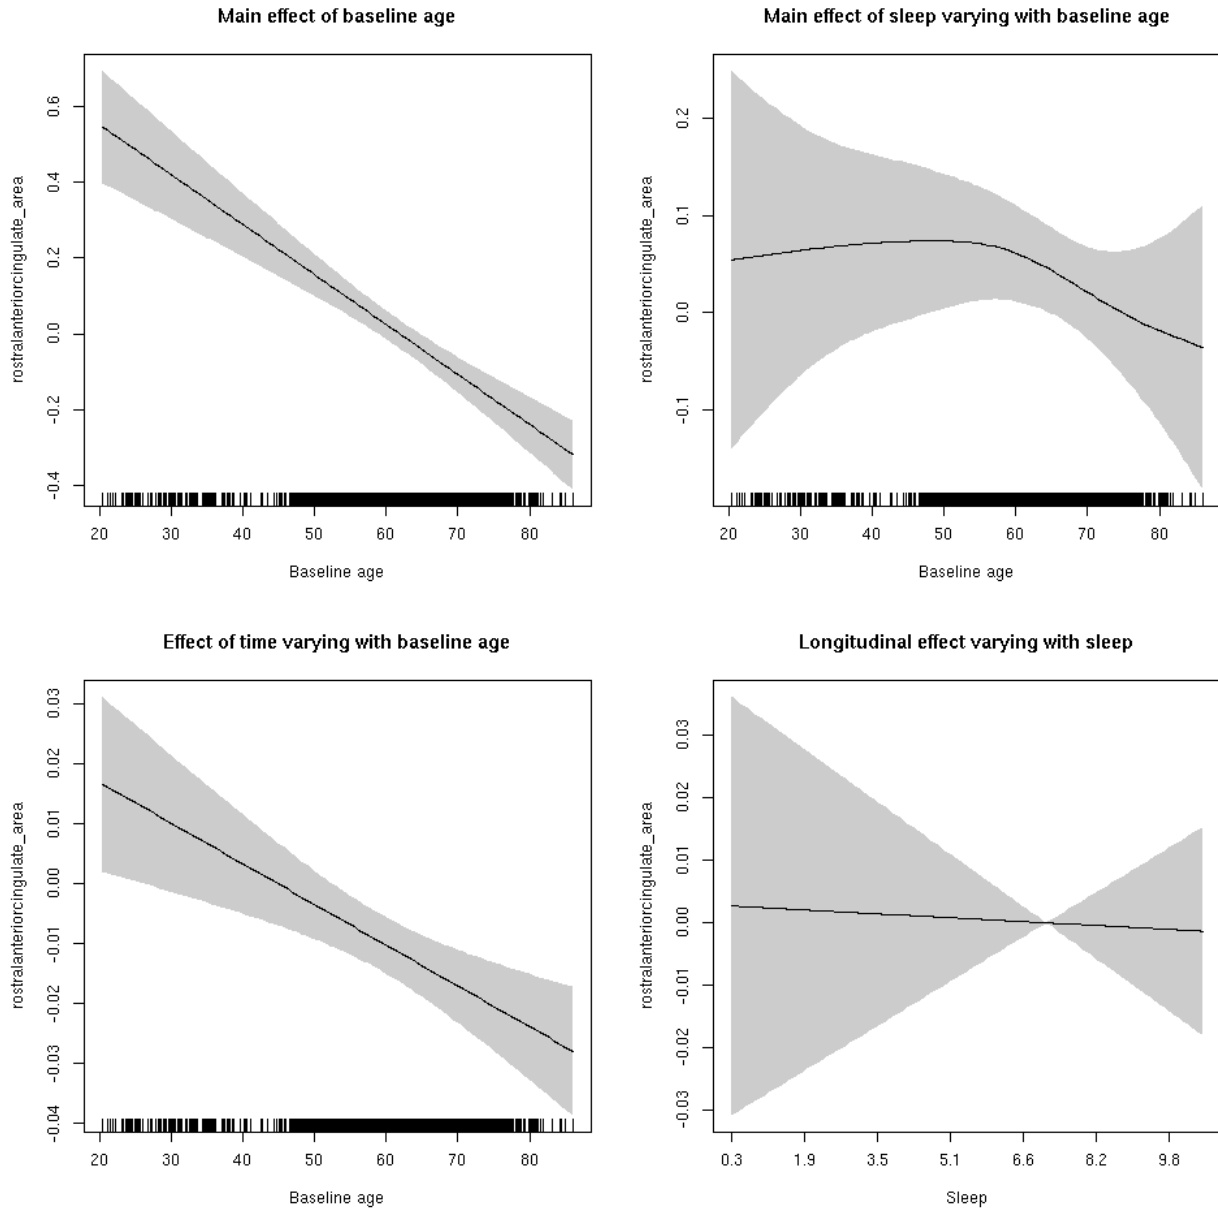

## rostralanteriorcingulate\_area

**Full data** Below is the model output. The term `s(sleep_z):time` is probably what we care most about.

```
##
## Family: gaussian
## Link function: identity
##
## Formula:
## value ~ sex + site + icv + s(bl_age, k = 10, bs = "cr") + s(bl_age,
##   by = sleep_z, bs = "cr") + +s(bl_age, by = time, k = 5, bs = "cr") +
##   s(sleep_z, by = time, k = 5, bs = "cr", pc = 0)
## <environment: 0x5630035b26b8>
```

```

##
## Parametric coefficients:
##           Estimate Std. Error t value Pr(>|t|)
## (Intercept)  0.69438   0.05781  12.012 < 2e-16 ***
## sexmale      0.14046   0.02974   4.724 2.35e-06 ***
## siteousAvanto -0.44227   0.07056  -6.268 3.83e-10 ***
## siteousPrisma -1.17272   0.15896  -7.377 1.77e-13 ***
## siteousSkyra  -0.16663   0.06830  -2.440  0.0147 *
## siteUB       -0.54250   0.13321  -4.073 4.69e-05 ***
## siteUCAM     -0.59118   0.07163  -8.253 < 2e-16 ***
## siteUKB     -0.80168   0.05483 -14.620 < 2e-16 ***
## siteUmU     -0.10728   0.08251  -1.300  0.1936
## icv         0.58310   0.01462  39.896 < 2e-16 ***
## ---
## Signif. codes:  0 '***' 0.001 '**' 0.01 '*' 0.05 '.' 0.1 ' ' 1
##
## Approximate significance of smooth terms:
##           edf Ref.df    F p-value
## s(bl_age)      2.790  2.790 22.265 <2e-16 ***
## s(bl_age):sleep_z 3.123  3.123  2.320  0.075 .
## s(bl_age):time  2.000  2.000 38.697 <2e-16 ***
## s(sleep_z):time  1.000  1.000  0.132  0.717
## ---
## Signif. codes:  0 '***' 0.001 '**' 0.01 '*' 0.05 '.' 0.1 ' ' 1
##
## R-sq.(adj) =  0.44
## lmer.REML = 9445.7  Scale est. = 0.033994  n = 8160

```

Below are plots of a plot of  $s(\text{bl\_age})$ ,  $s(\text{bl\_age}):\text{sleep\_z}$ ,  $s(\text{bl\_age}):\text{time}$ , and  $s(\text{sleep\_z}):\text{time}$ . For  $s(\text{sleep\_z}):\text{time}$ , roughly, if we cannot fit a straight line through the confidence bands, there is evidence that the effect of time depends on sleep duration. It is correct that the confidence interval is zero at one point along the axis; this happens because we do not include the main effect.

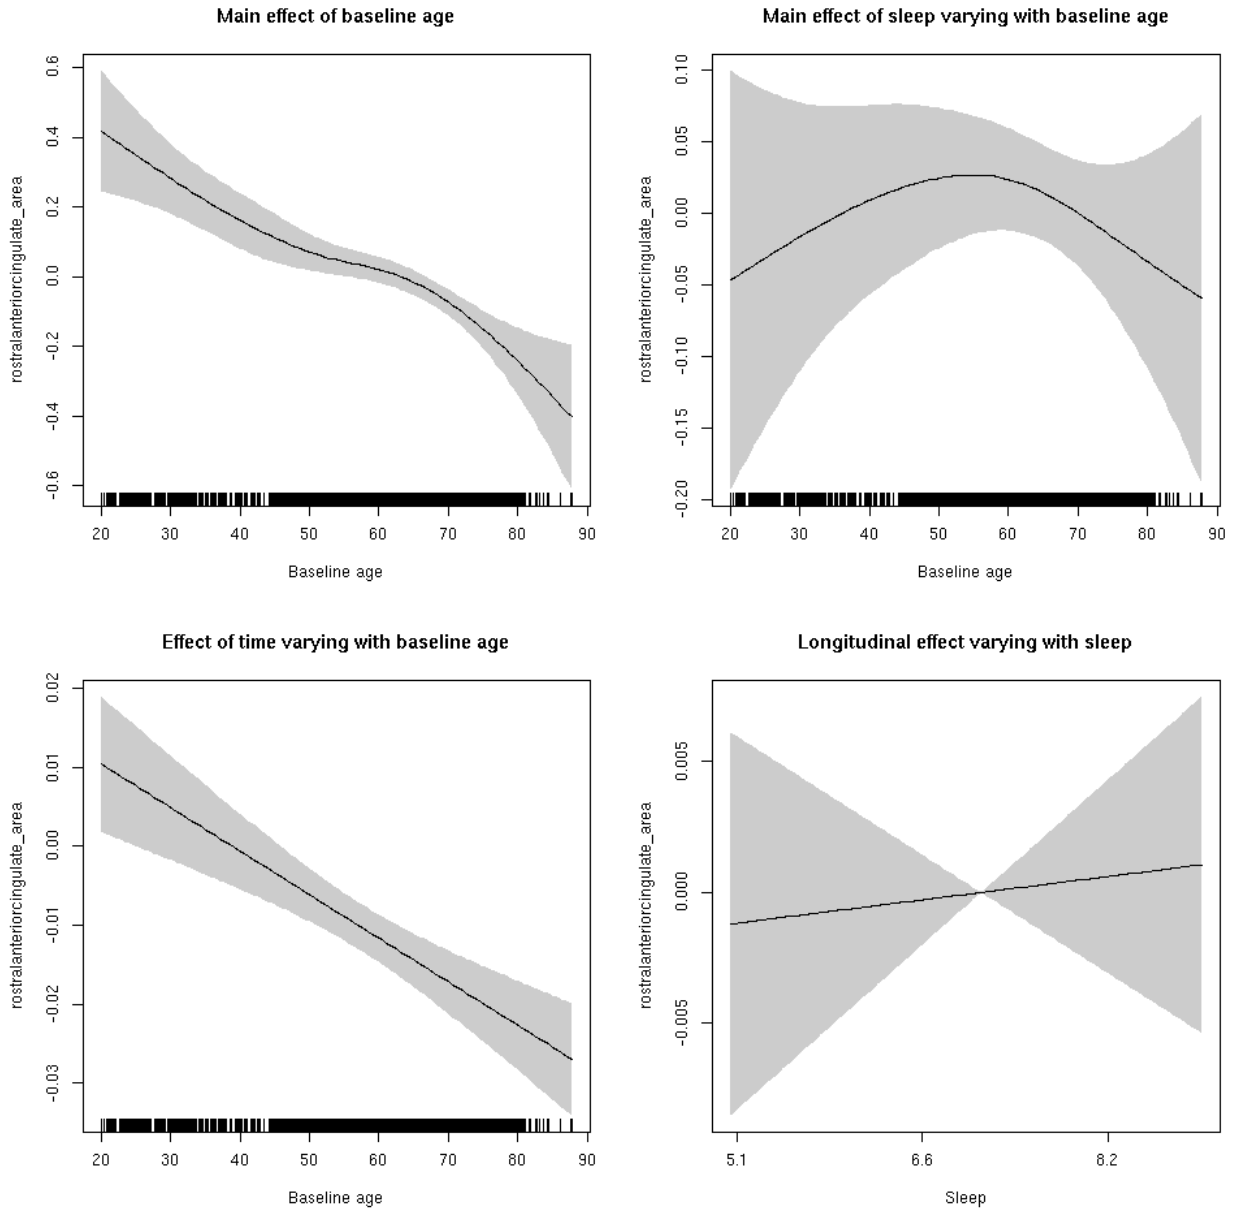

**Restricted to sleep  $\geq 5$  and  $\leq 9$  hours** Below is the row for `s(sleep_z):time` from the model output.

```
## s(sleep_z):time 1.000 1.000 0.108 0.742
```

Below are plots of a plot of `s(bl_age)`, `s(bl_age):sleep_z`, `s(bl_age):time`, and `s(sleep_z):time`. For `s(sleep_z):time`, roughly, if we cannot fit a straight line through the confidence bands, there is evidence that the effect of time depends on sleep duration. It is correct that the confidence interval is zero at one point along the axis; this happens because we do not include the main effect.

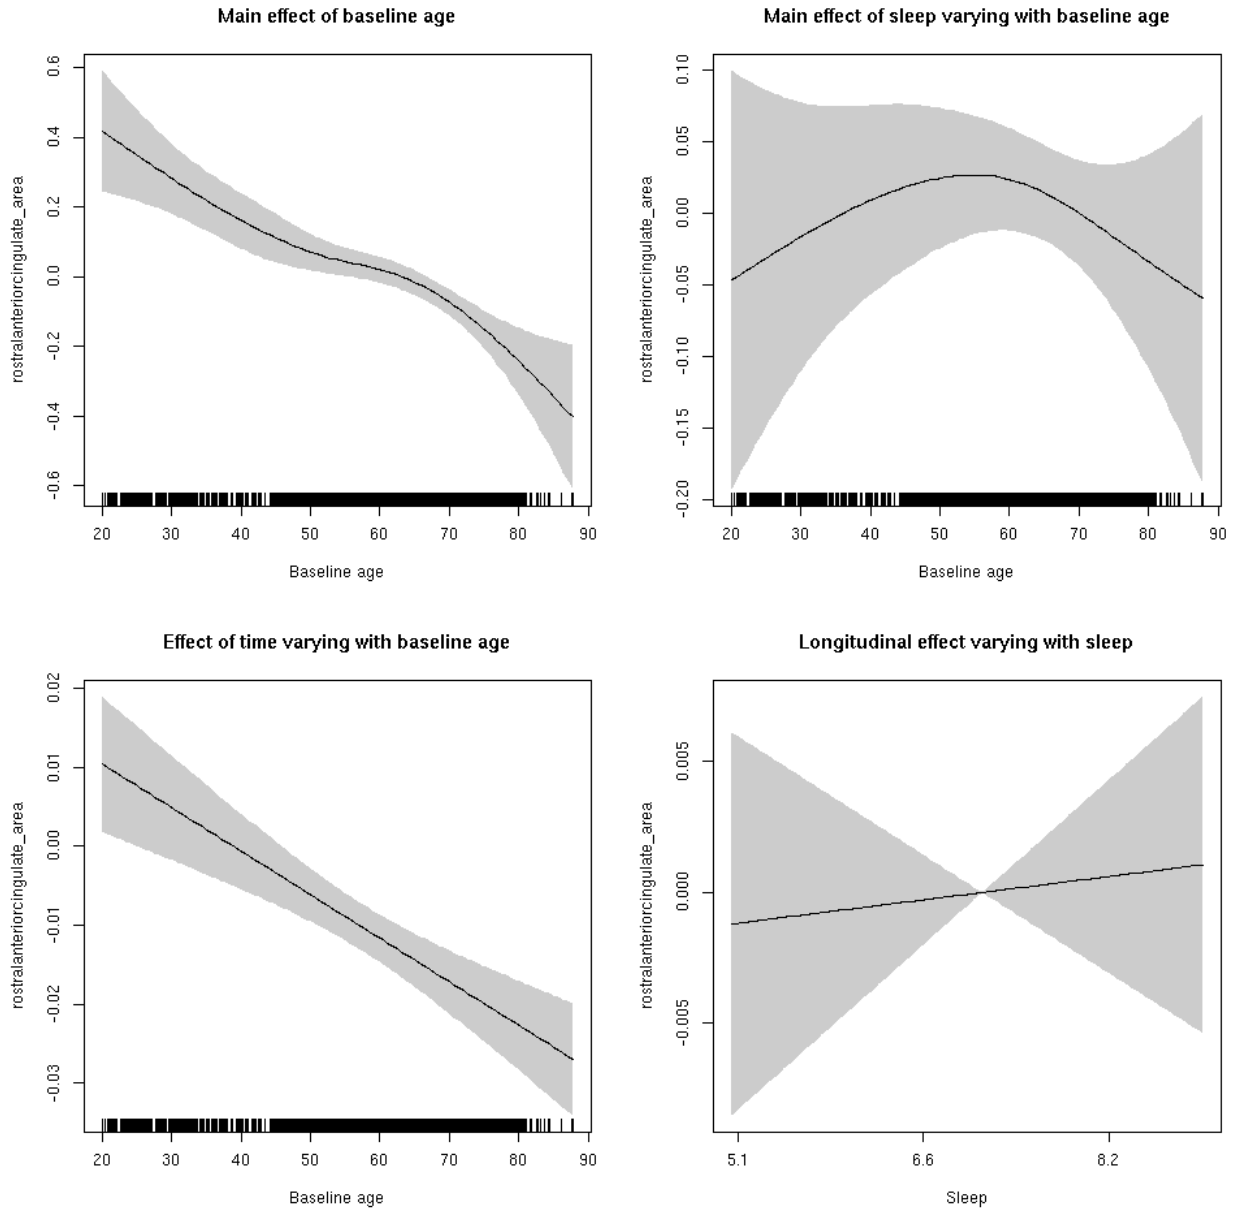

## rostralanteriorcingulate\_thickness: Stratified by sex

**Female: Full data** Below is the row for `s(sleep_z):time` from the model output.

```
## s(sleep_z):time  1.000  1.000  1.638  0.201
```

Below are plots of a plot of `s(bl_age)`, `s(bl_age):sleep_z`, `s(bl_age):time`, and `s(sleep_z):time`. For `s(sleep_z):time`, roughly, if we cannot fit a straight line through the confidence bands, there is evidence that the effect of time depends on sleep duration. It is correct that the confidence interval is zero at one point along the axis; this happens because we do not include the main effect.



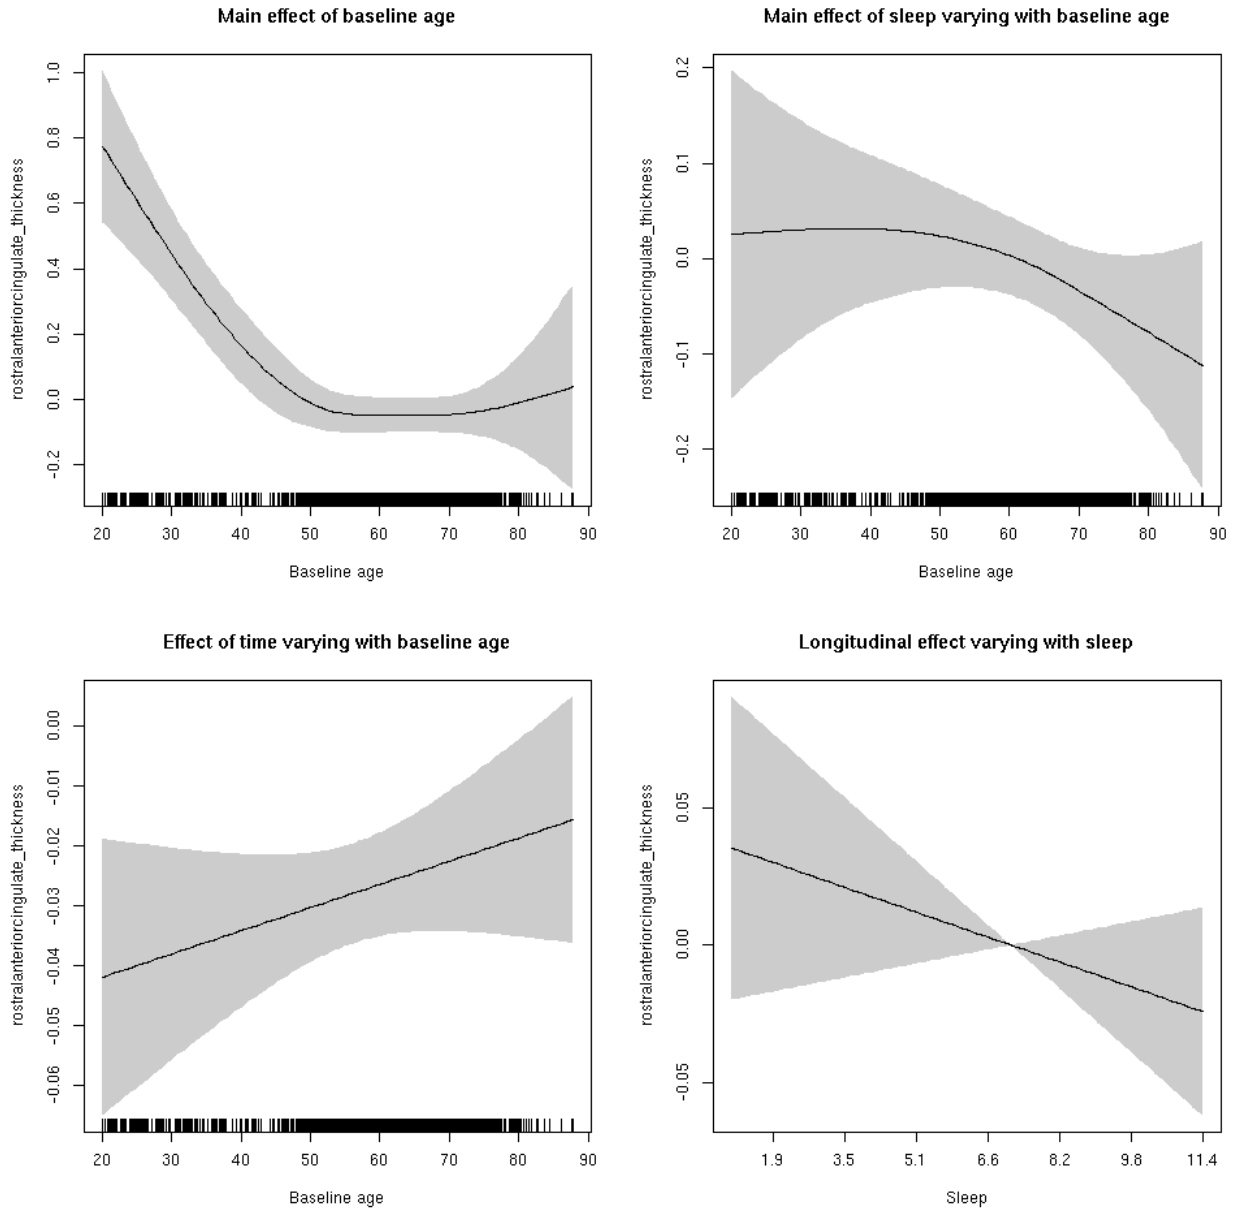

**Male: Full data** Below is the row for `s(sleep_z):time` from the model output.

```
## s(sleep_z):time  1.000  1.000  0.003  0.956
```

Below are plots of a plot of `s(bl_age)`, `s(bl_age):sleep_z`, `s(bl_age):time`, and `s(sleep_z):time`. For `s(sleep_z):time`, roughly, if we cannot fit a straight line through the confidence bands, there is evidence that the effect of time depends on sleep duration. It is correct that the confidence interval is zero at one point along the axis; this happens because we do not include the main effect.

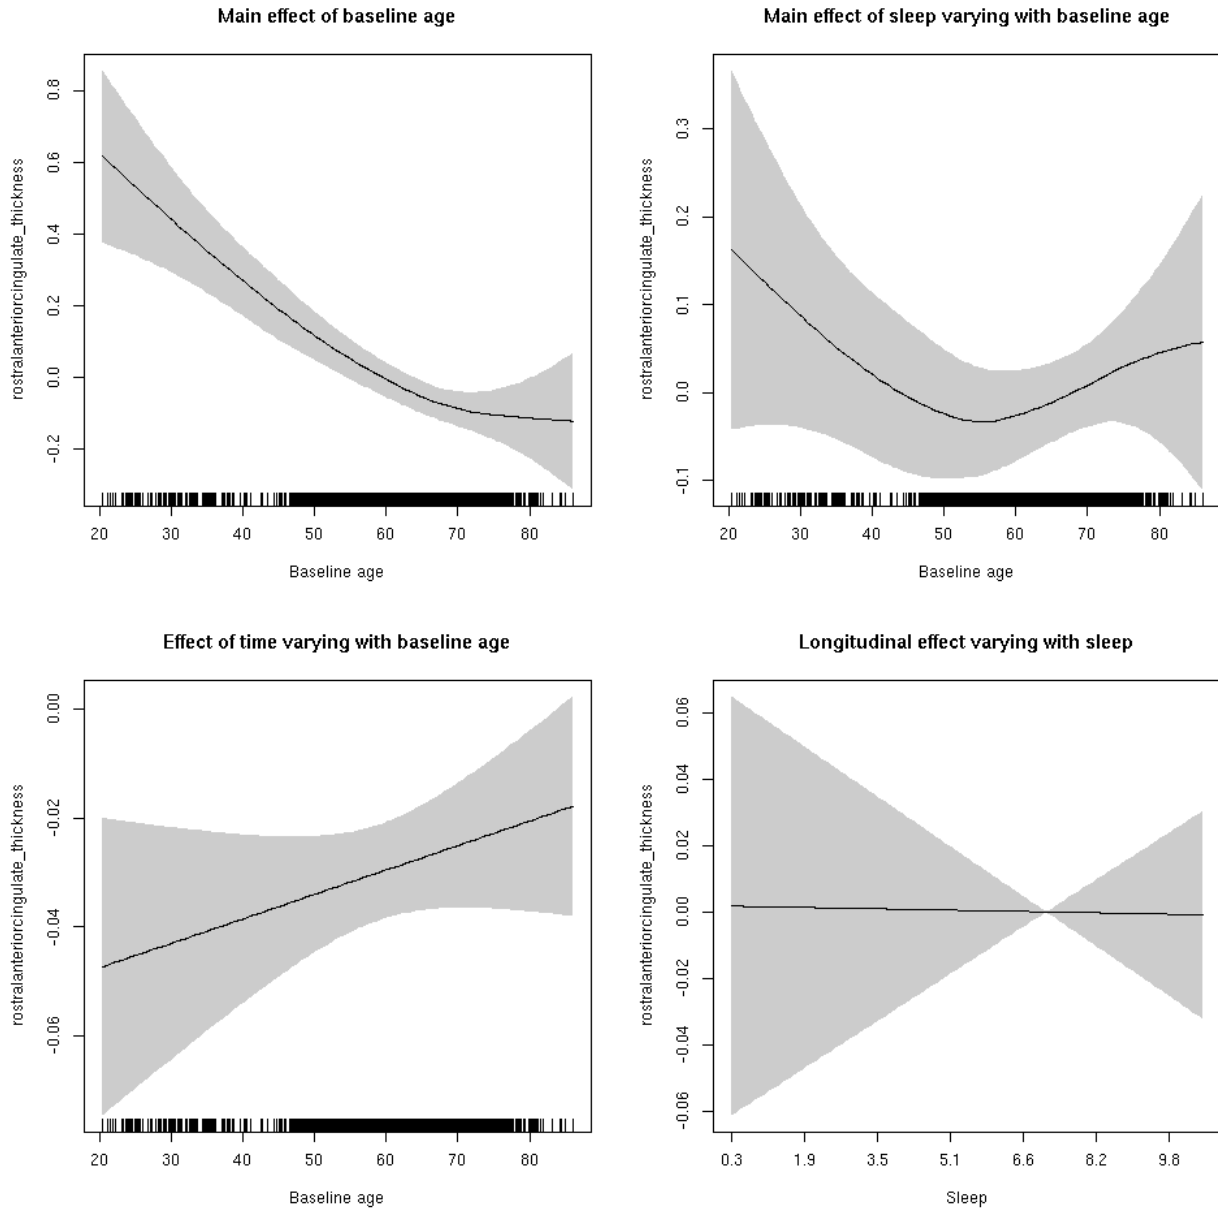

## rostralanteriorcingulate\_thickness

**Full data** Below is the model output. The term `s(sleep_z):time` is probably what we care most about.

```
##
## Family: gaussian
## Link function: identity
##
## Formula:
## value ~ sex + site + s(bl_age, k = 10, bs = "cr") + s(bl_age,
##   by = sleep_z, bs = "cr") + +s(bl_age, by = time, k = 5, bs = "cr") +
##   s(sleep_z, by = time, k = 5, bs = "cr", pc = 0)
## <environment: 0x5630035da1f8>
```

```

##
## Parametric coefficients:
##           Estimate Std. Error t value Pr(>|t|)
## (Intercept) -1.72064    0.04935 -34.867 < 2e-16 ***
## sexmale     -0.06089    0.02476  -2.460 0.013925 *
## siteousAvanto 0.08987    0.06584   1.365 0.172308
## siteousPrisma 0.63264    0.29624   2.136 0.032747 *
## siteousSkyra  0.06030    0.06579   0.917 0.359425
## siteUB       0.32773    0.13073   2.507 0.012202 *
## siteUCAM     0.18488    0.06782   2.726 0.006423 **
## siteUKB      1.98391    0.04995  39.717 < 2e-16 ***
## siteUmU      0.30606    0.08140   3.760 0.000171 ***
## ---
## Signif. codes:  0 '***' 0.001 '**' 0.01 '*' 0.05 '.' 0.1 ' ' 1
##
## Approximate significance of smooth terms:
##           edf Ref.df      F p-value
## s(bl_age)      3.325  3.325 27.462 <2e-16 ***
## s(bl_age):sleep_z 2.000  2.000  1.190  0.304
## s(bl_age):time  2.000  2.000 46.665 <2e-16 ***
## s(sleep_z):time 1.000  1.000  1.029  0.310
## ---
## Signif. codes:  0 '***' 0.001 '**' 0.01 '*' 0.05 '.' 0.1 ' ' 1
##
## R-sq.(adj) =  0.515
## lmer.REML = 15917  Scale est. = 0.15325  n = 8172

```

Below are plots of a plot of `s(bl_age)`, `s(bl_age):sleep_z`, `s(bl_age):time`, and `s(sleep_z):time`. For `s(sleep_z):time`, roughly, if we cannot fit a straight line through the confidence bands, there is evidence that the effect of time depends on sleep duration. It is correct that the confidence interval is zero at one point along the axis; this happens because we do not include the main effect.

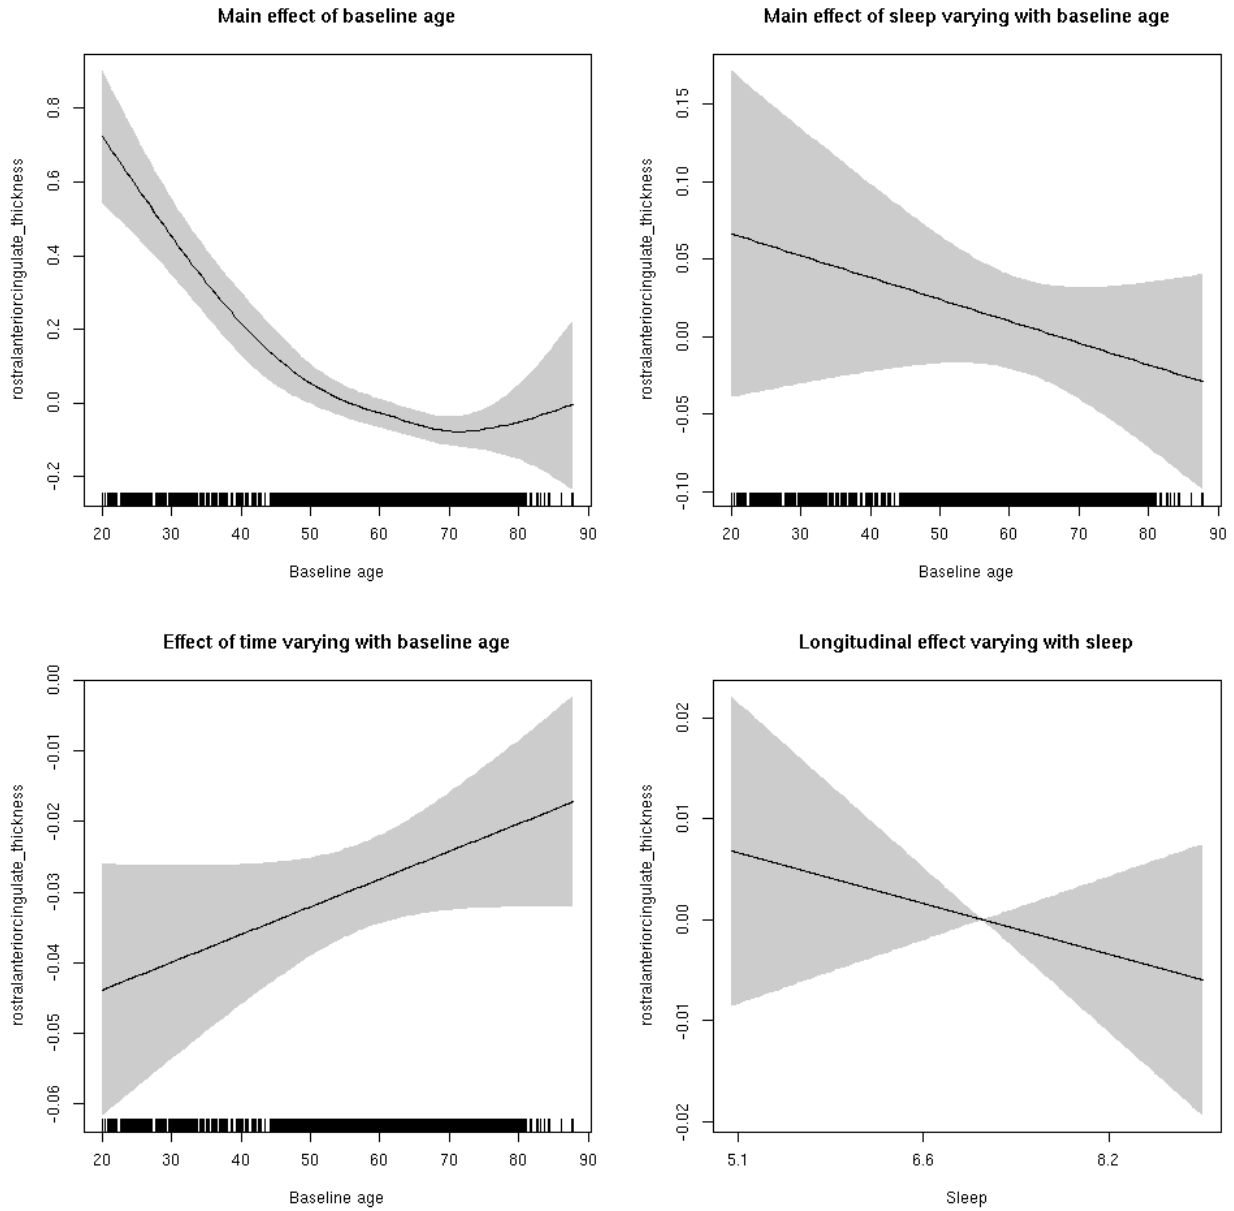

**Restricted to sleep  $\geq 5$  and  $\leq 9$  hours** Below is the row for `s(sleep_z):time` from the model output.

```
## s(sleep_z):time 1.000 1.000 0.782 0.376
```

Below are plots of a plot of `s(bl_age)`, `s(bl_age):sleep_z`, `s(bl_age):time`, and `s(sleep_z):time`. For `s(sleep_z):time`, roughly, if we cannot fit a straight line through the confidence bands, there is evidence that the effect of time depends on sleep duration. It is correct that the confidence interval is zero at one point along the axis; this happens because we do not include the main effect.

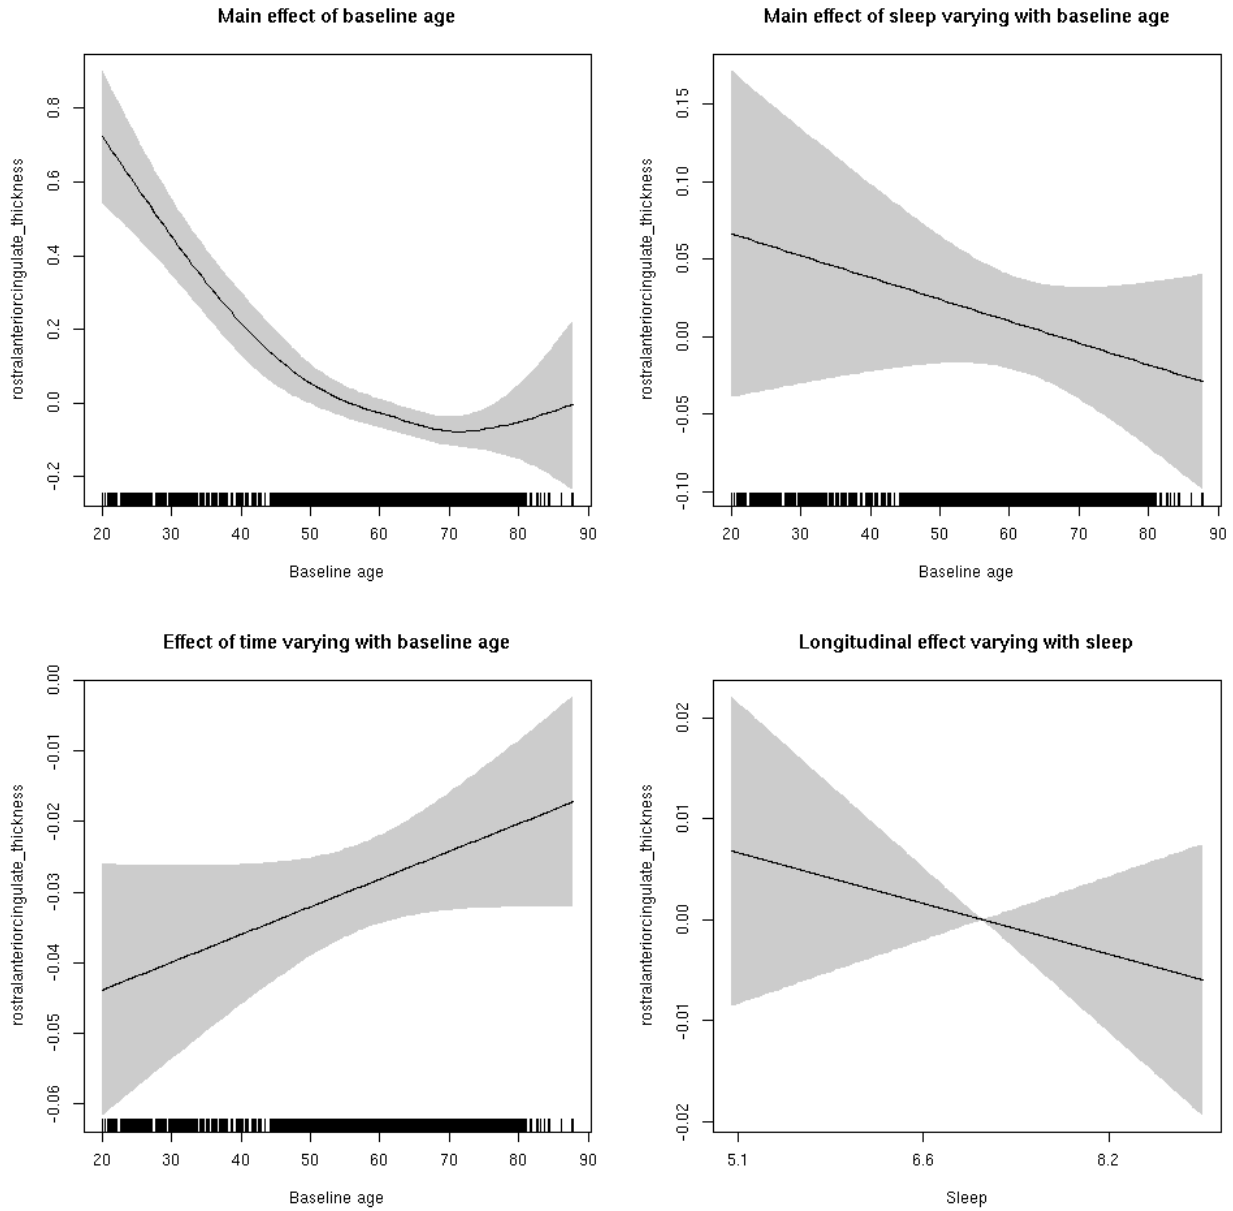

## rostralanteriorcingulate\_volume: Stratified by sex

**Female: Full data** Below is the row for `s(sleep_z):time` from the model output.

```
## s(sleep_z):time  1.000  1.000  0.538  0.463
```

Below are plots of a plot of `s(bl_age)`, `s(bl_age):sleep_z`, `s(bl_age):time`, and `s(sleep_z):time`. For `s(sleep_z):time`, roughly, if we cannot fit a straight line through the confidence bands, there is evidence that the effect of time depends on sleep duration. It is correct that the confidence interval is zero at one point along the axis; this happens because we do not include the main effect.

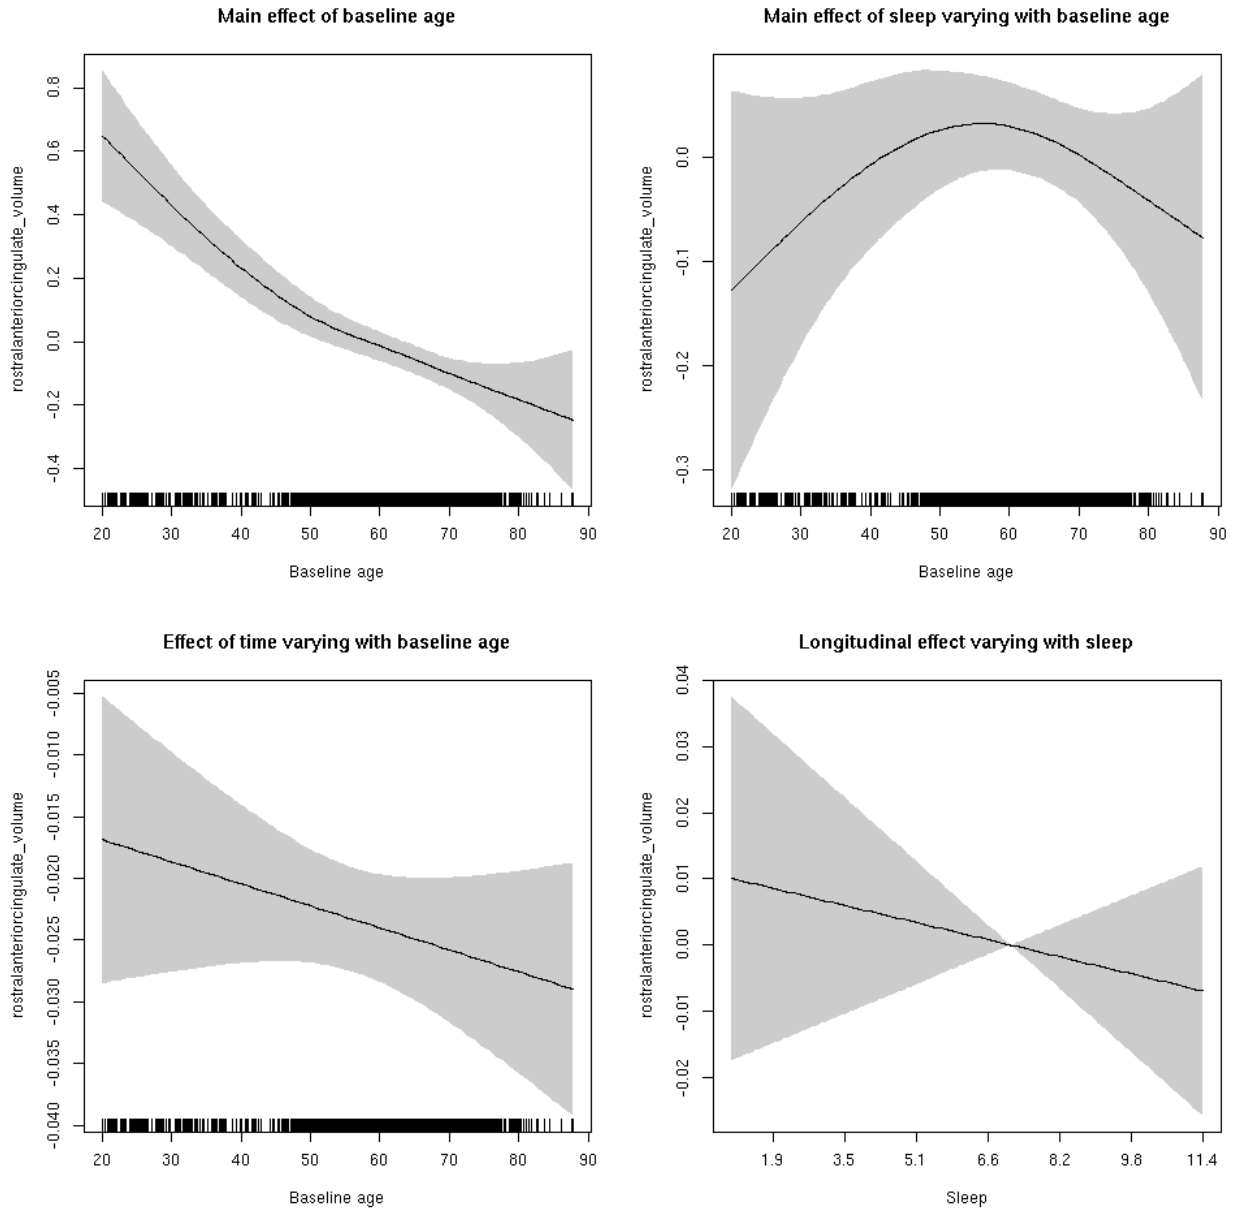

**Male: Full data** Below is the row for `s(sleep_z):time` from the model output.

```
## s(sleep_z):time      1      1  0.120  0.7292
```

Below are plots of a plot of `s(bl_age)`, `s(bl_age):sleep_z`, `s(bl_age):time`, and `s(sleep_z):time`. For `s(sleep_z):time`, roughly, if we cannot fit a straight line through the confidence bands, there is evidence that the effect of time depends on sleep duration. It is correct that the confidence interval is zero at one point along the axis; this happens because we do not include the main effect.

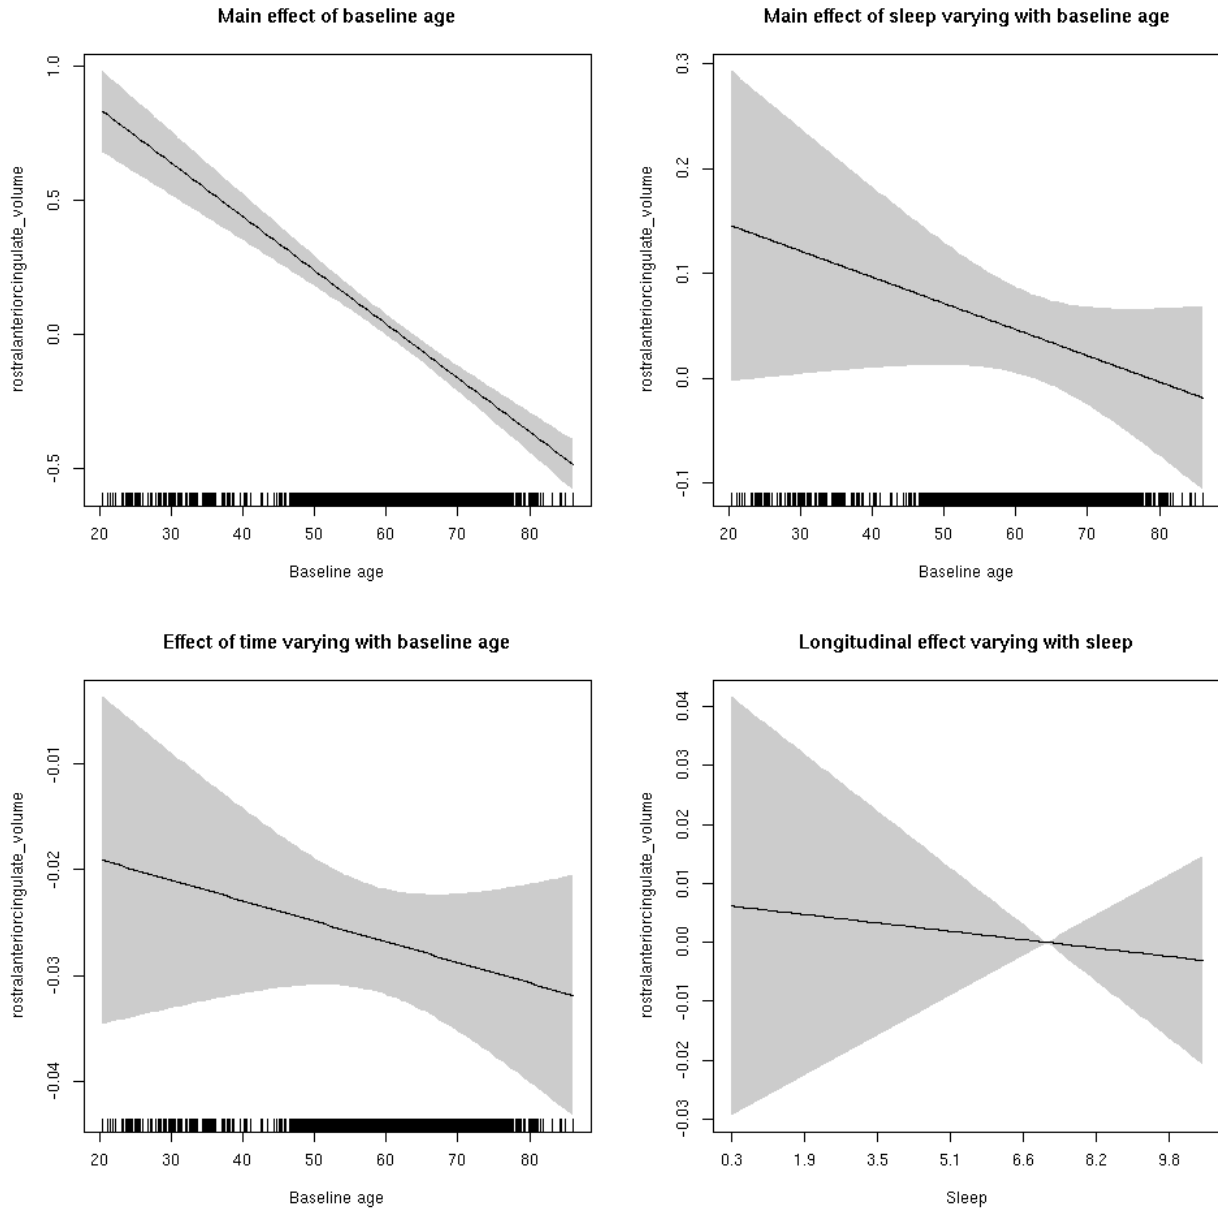

## rostralanteriorcingulate\_volume

**Full data** Below is the model output. The term `s(sleep_z):time` is probably what we care most about.

```
##
## Family: gaussian
## Link function: identity
##
## Formula:
## value ~ sex + site + icv + s(bl_age, k = 10, bs = "cr") + s(bl_age,
##   by = sleep_z, bs = "cr") + +s(bl_age, by = time, k = 5, bs = "cr") +
##   s(sleep_z, by = time, k = 5, bs = "cr", pc = 0)
## <environment: 0x5630035ad458>
```

```

##
## Parametric coefficients:
##           Estimate Std. Error t value Pr(>|t|)
## (Intercept) -0.20390    0.05966  -3.417 0.000635 ***
## sexmale      0.12978    0.03070   4.227 2.39e-05 ***
## siteousAvanto -0.39602    0.07296  -5.428 5.85e-08 ***
## siteousPrisma -0.60293    0.17324  -3.480 0.000503 ***
## siteousSkyra  -0.13968    0.07060  -1.978 0.047915 *
## siteUB       -0.28287    0.13744  -2.058 0.039604 *
## siteUCAM     -0.40126    0.07383  -5.435 5.64e-08 ***
## siteUKB      0.24295    0.05644   4.304 1.69e-05 ***
## siteUmU      0.10220    0.08516   1.200 0.230176
## icv          0.51333    0.01514  33.906 < 2e-16 ***
## ---
## Signif. codes:  0 '***' 0.001 '**' 0.01 '*' 0.05 '.' 0.1 ' ' 1
##
## Approximate significance of smooth terms:
##           edf Ref.df      F p-value
## s(bl_age)      2.346  2.346  74.389 <2e-16 ***
## s(bl_age):sleep_z 2.938  2.938   1.735  0.122
## s(bl_age):time  2.000  2.000 119.618 <2e-16 ***
## s(sleep_z):time  1.000  1.000   0.614  0.433
## ---
## Signif. codes:  0 '***' 0.001 '**' 0.01 '*' 0.05 '.' 0.1 ' ' 1
##
## R-sq.(adj) =  0.396
## lmer.REML = 10575  Scale est. = 0.041594  n = 8174

```

Below are plots of a plot of `s(bl_age)`, `s(bl_age):sleep_z`, `s(bl_age):time`, and `s(sleep_z):time`. For `s(sleep_z):time`, roughly, if we cannot fit a straight line through the confidence bands, there is evidence that the effect of time depends on sleep duration. It is correct that the confidence interval is zero at one point along the axis; this happens because we do not include the main effect.



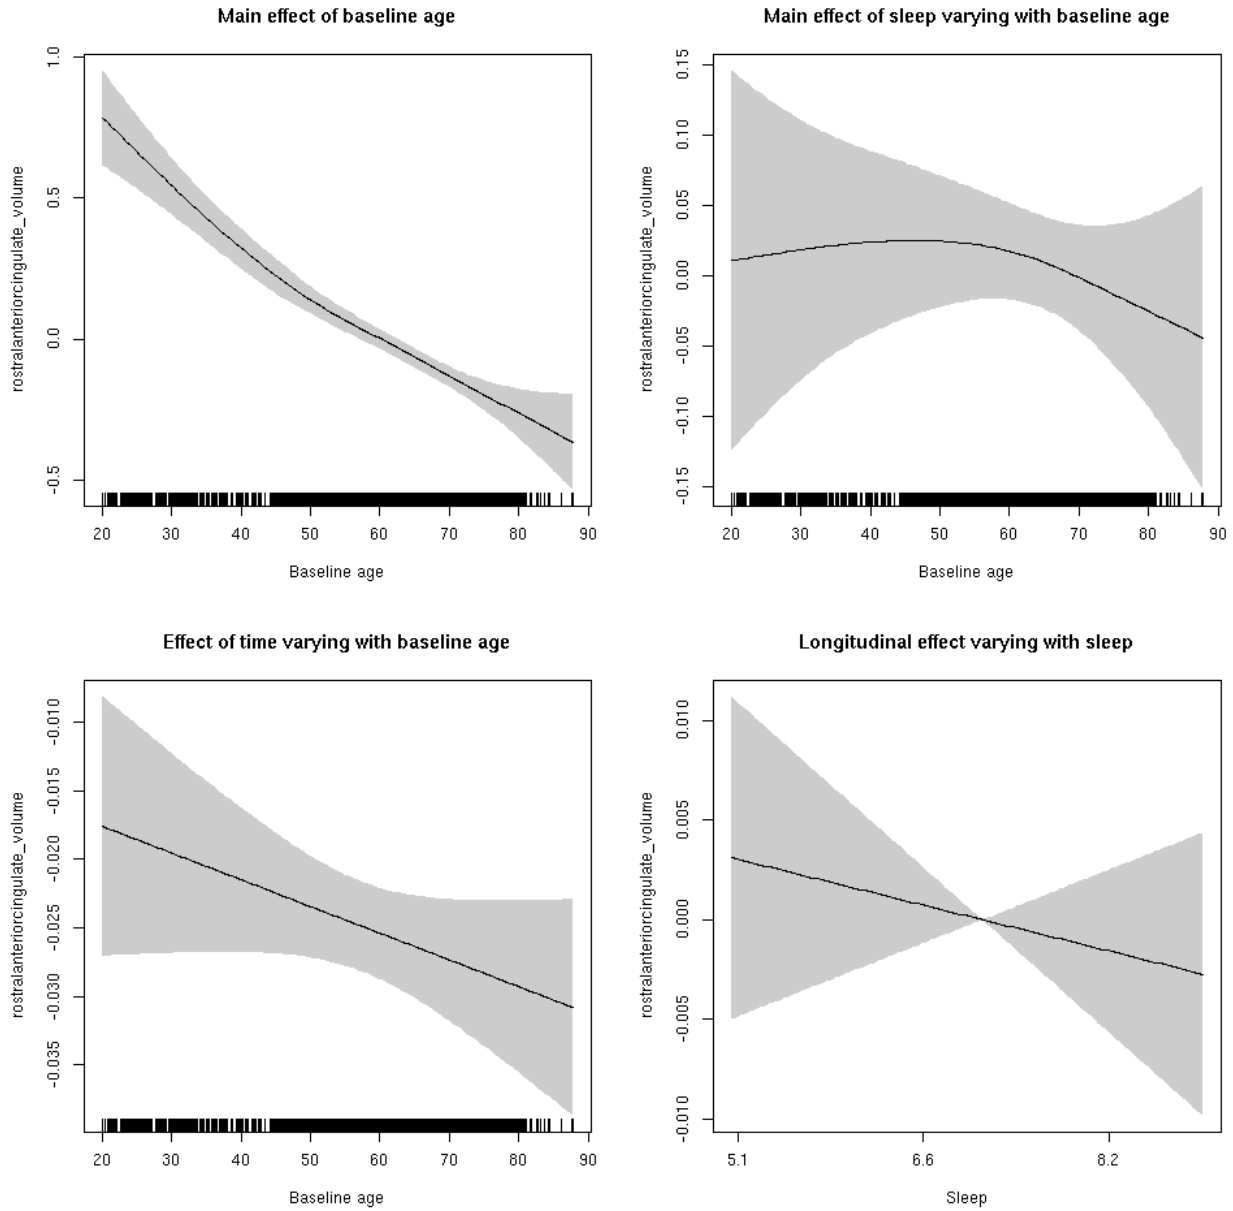

**Restricted to sleep  $\geq 5$  and  $\leq 9$  hours** Below is the row for `s(sleep_z):time` from the model output.

```
## s(sleep_z):time  1.000  1.000  0.590  0.442
```

Below are plots of a plot of `s(bl_age)`, `s(bl_age):sleep_z`, `s(bl_age):time`, and `s(sleep_z):time`. For `s(sleep_z):time`, roughly, if we cannot fit a straight line through the confidence bands, there is evidence that the effect of time depends on sleep duration. It is correct that the confidence interval is zero at one point along the axis; this happens because we do not include the main effect.

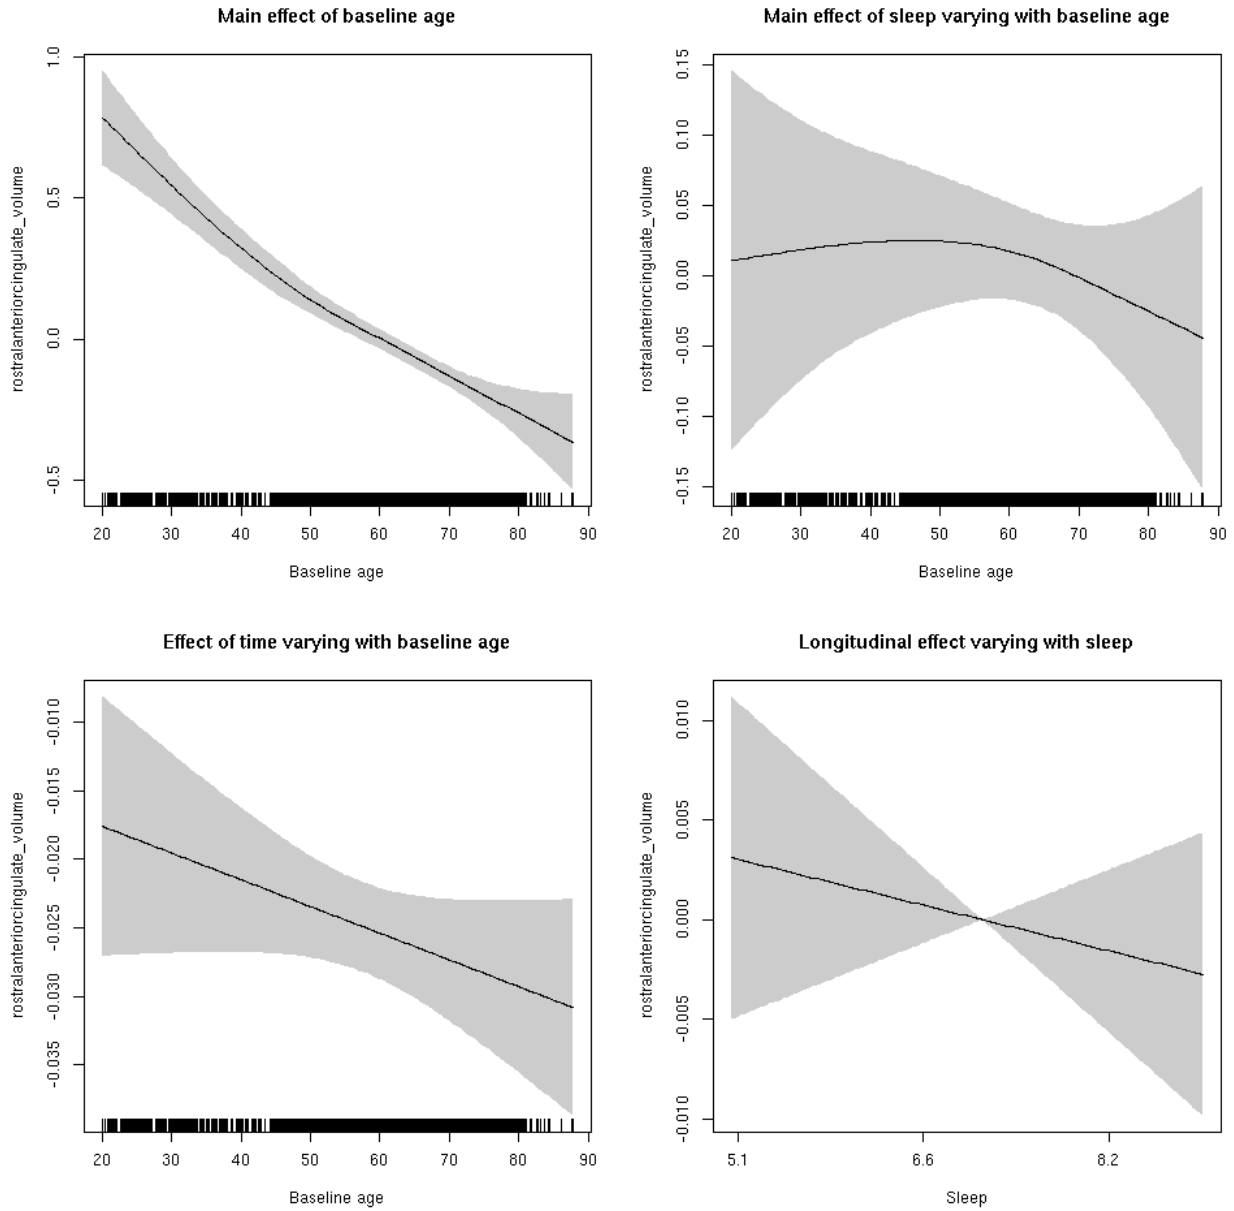

## rostralmiddlefrontal\_area: Stratified by sex

**Female: Full data** Below is the row for `s(sleep_z):time` from the model output.

```
## s(sleep_z):time  1.000  1.000  0.007  0.931
```

Below are plots of a plot of `s(bl_age)`, `s(bl_age):sleep_z`, `s(bl_age):time`, and `s(sleep_z):time`. For `s(sleep_z):time`, roughly, if we cannot fit a straight line through the confidence bands, there is evidence that the effect of time depends on sleep duration. It is correct that the confidence interval is zero at one point along the axis; this happens because we do not include the main effect.

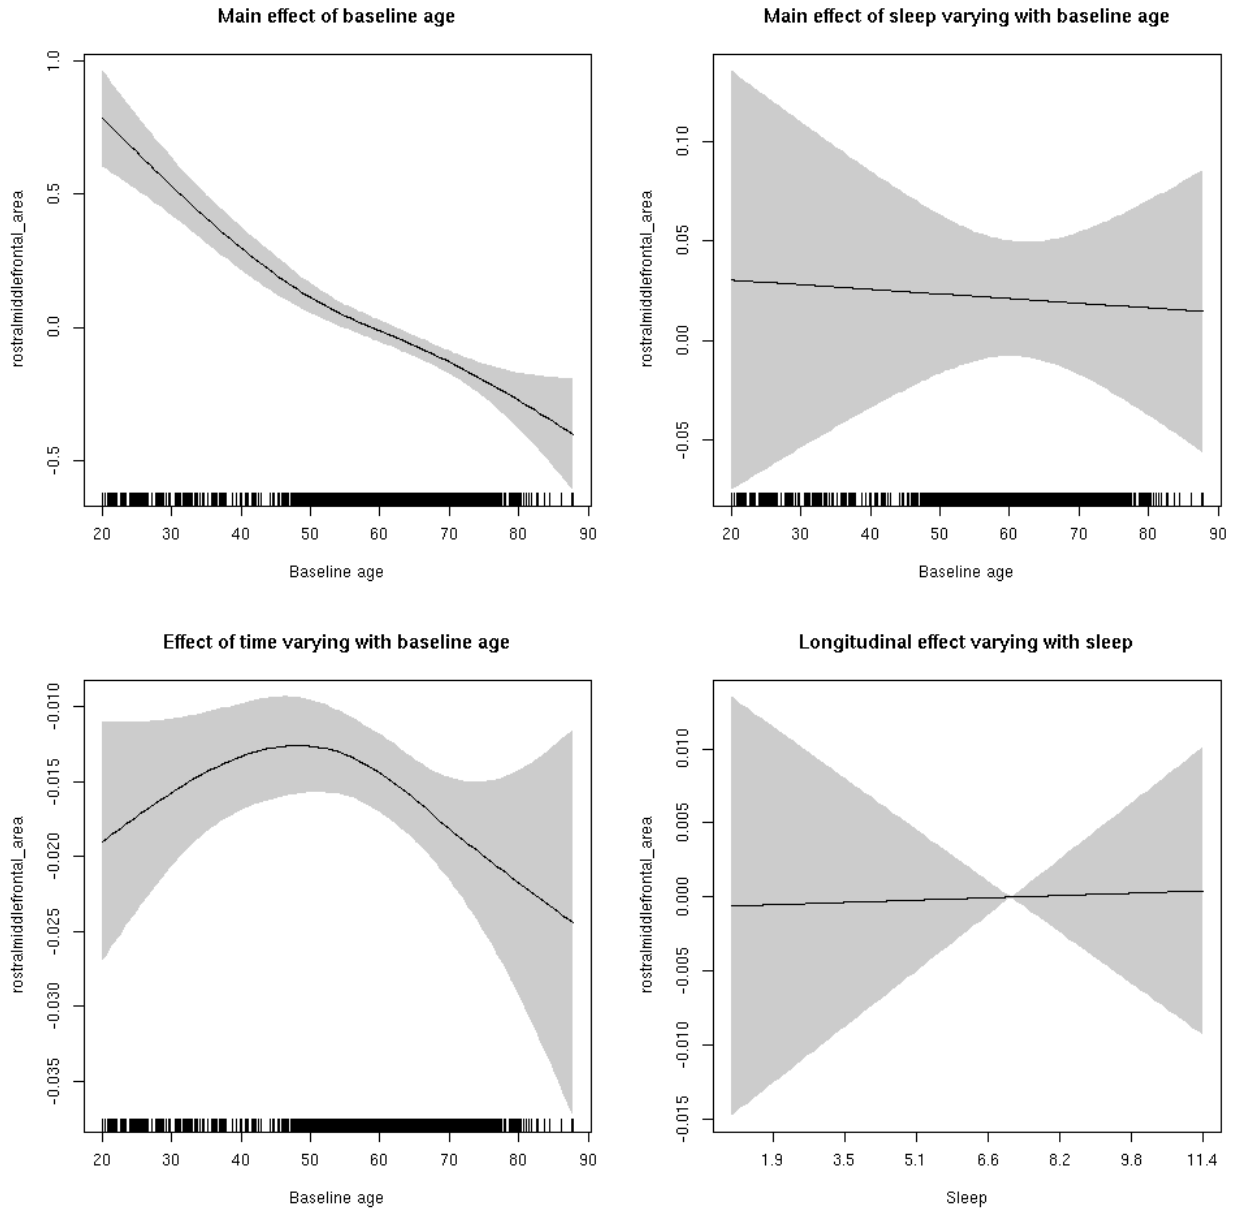

**Male: Full data** Below is the row for `s(sleep_z):time` from the model output.

```
## s(sleep_z):time  1.000  1.000  0.294  0.588
```

Below are plots of a plot of `s(bl_age)`, `s(bl_age):sleep_z`, `s(bl_age):time`, and `s(sleep_z):time`. For `s(sleep_z):time`, roughly, if we cannot fit a straight line through the confidence bands, there is evidence that the effect of time depends on sleep duration. It is correct that the confidence interval is zero at one point along the axis; this happens because we do not include the main effect.

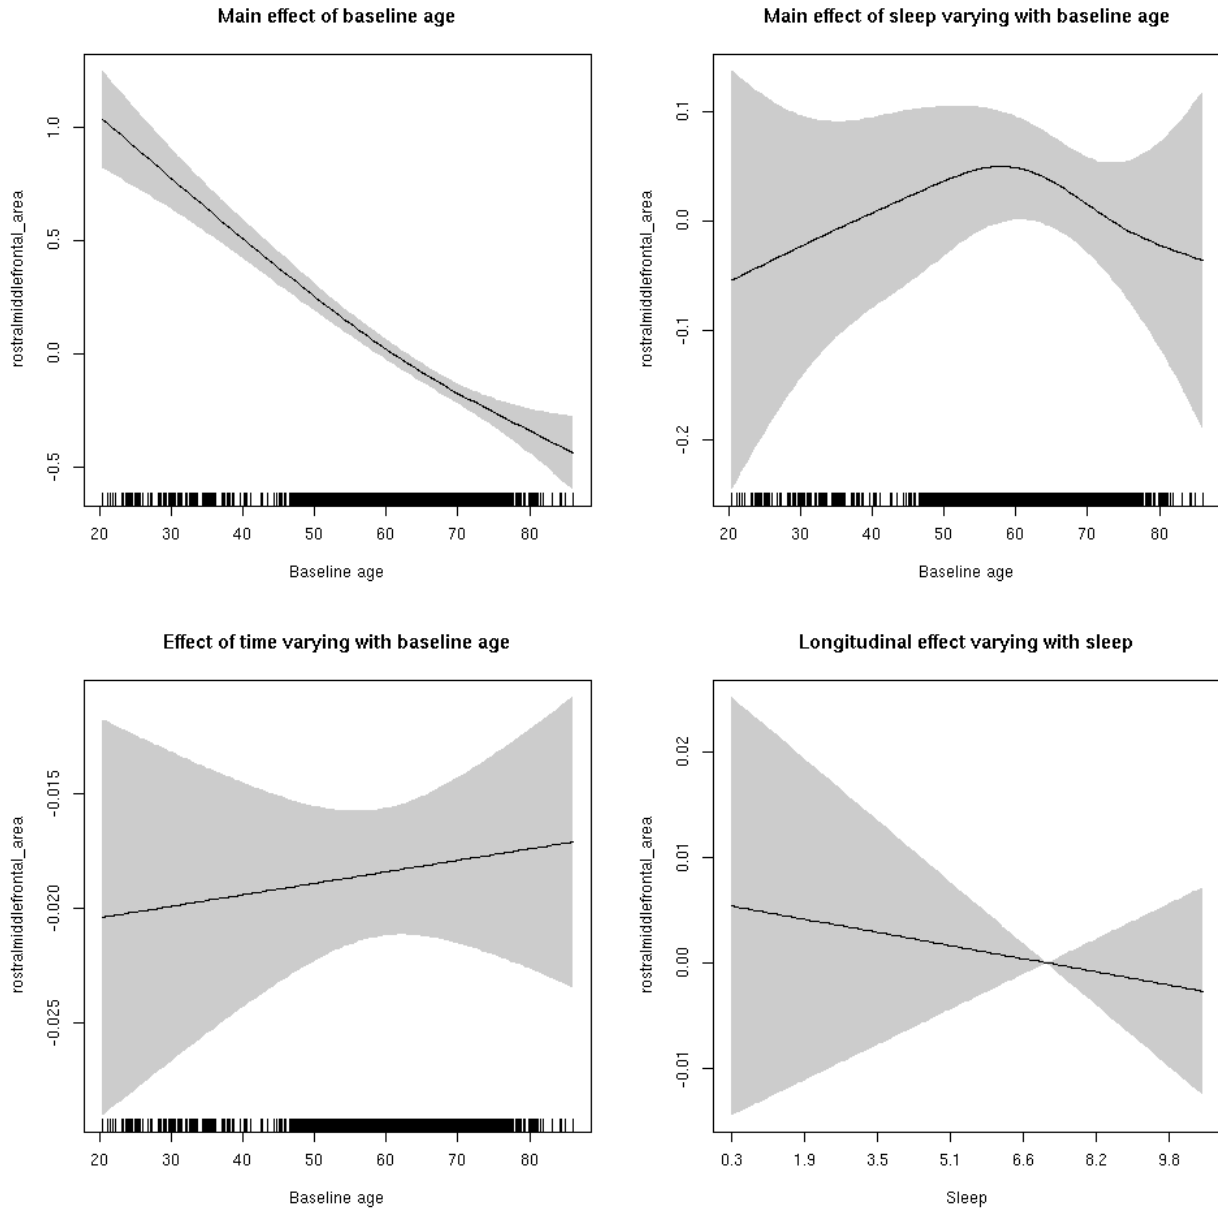

## rostralmiddlefrontal\_area

**Full data** Below is the model output. The term `s(sleep_z):time` is probably what we care most about.

```
##
## Family: gaussian
## Link function: identity
##
## Formula:
## value ~ sex + site + icv + s(bl_age, k = 10, bs = "cr") + s(bl_age,
##   by = sleep_z, bs = "cr") + +s(bl_age, by = time, k = 5, bs = "cr") +
##   s(sleep_z, by = time, k = 5, bs = "cr", pc = 0)
## <environment: 0x5630035b5768>
```

```

##
## Parametric coefficients:
##           Estimate Std. Error t value Pr(>|t|)
## (Intercept)  0.96791    0.05148  18.800 < 2e-16 ***
## sexmale      0.24640    0.02648   9.304 < 2e-16 ***
## siteousAvanto -0.88720    0.06280 -14.127 < 2e-16 ***
## siteousPrisma -1.09739    0.10632 -10.321 < 2e-16 ***
## siteousSkyra  -0.67450    0.06089 -11.078 < 2e-16 ***
## siteUB       -0.98657    0.11948  -8.257 < 2e-16 ***
## siteUCAM     -1.07879    0.06393 -16.875 < 2e-16 ***
## siteUKB      -1.09294    0.04882 -22.385 < 2e-16 ***
## siteUmU      -0.27848    0.07383  -3.772 0.000163 ***
## icv          0.60907    0.01283  47.459 < 2e-16 ***
## ---
## Signif. codes:  0 '***' 0.001 '**' 0.01 '*' 0.05 '.' 0.1 ' ' 1
##
## Approximate significance of smooth terms:
##           edf Ref.df      F p-value
## s(bl_age)      2.330  2.330 140.416 <2e-16 ***
## s(bl_age):sleep_z 2.661  2.661   1.008   0.311
## s(bl_age):time  2.000  2.000 185.890 <2e-16 ***
## s(sleep_z):time  1.000  1.000   0.225   0.636
## ---
## Signif. codes:  0 '***' 0.001 '**' 0.01 '*' 0.05 '.' 0.1 ' ' 1
##
## R-sq.(adj) =  0.55
## lmer.REML = 4117.5  Scale est. = 0.01189  n = 8154

```

Below are plots of a plot of `s(bl_age)`, `s(bl_age):sleep_z`, `s(bl_age):time`, and `s(sleep_z):time`. For `s(sleep_z):time`, roughly, if we cannot fit a straight line through the confidence bands, there is evidence that the effect of time depends on sleep duration. It is correct that the confidence interval is zero at one point along the axis; this happens because we do not include the main effect.

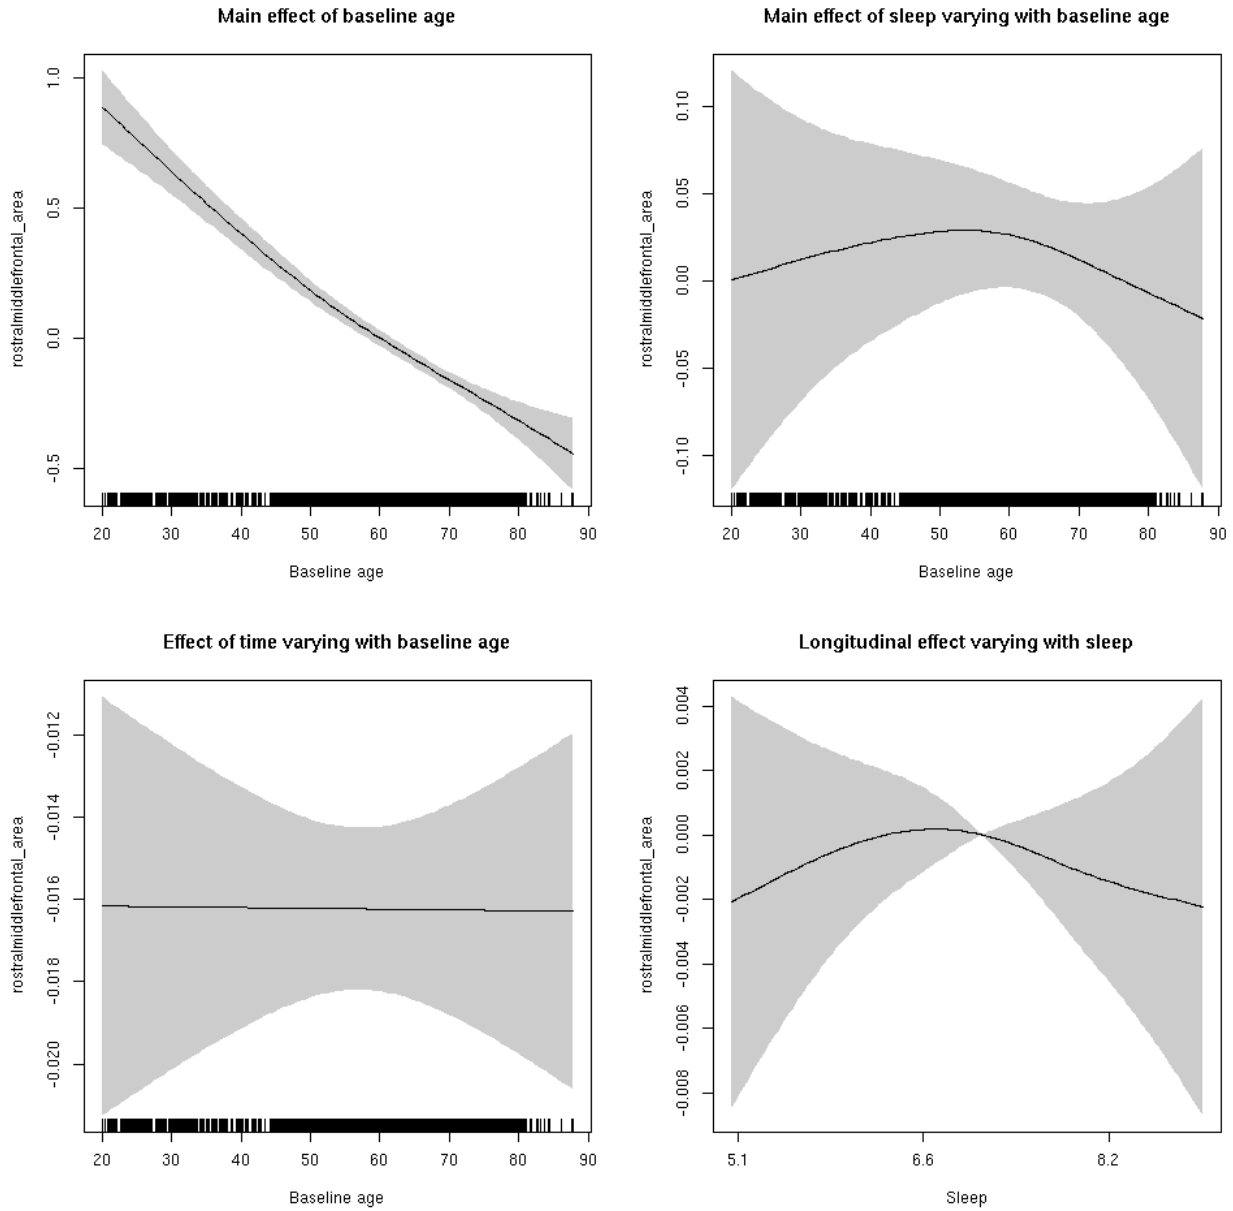

**Restricted to sleep  $\geq 5$  and  $\leq 9$  hours** Below is the row for `s(sleep_z):time` from the model output.

```
## s(sleep_z):time  1.603  1.603  0.396  0.614
```

Below are plots of a plot of `s(bl_age)`, `s(bl_age):sleep_z`, `s(bl_age):time`, and `s(sleep_z):time`. For `s(sleep_z):time`, roughly, if we cannot fit a straight line through the confidence bands, there is evidence that the effect of time depends on sleep duration. It is correct that the confidence interval is zero at one point along the axis; this happens because we do not include the main effect.

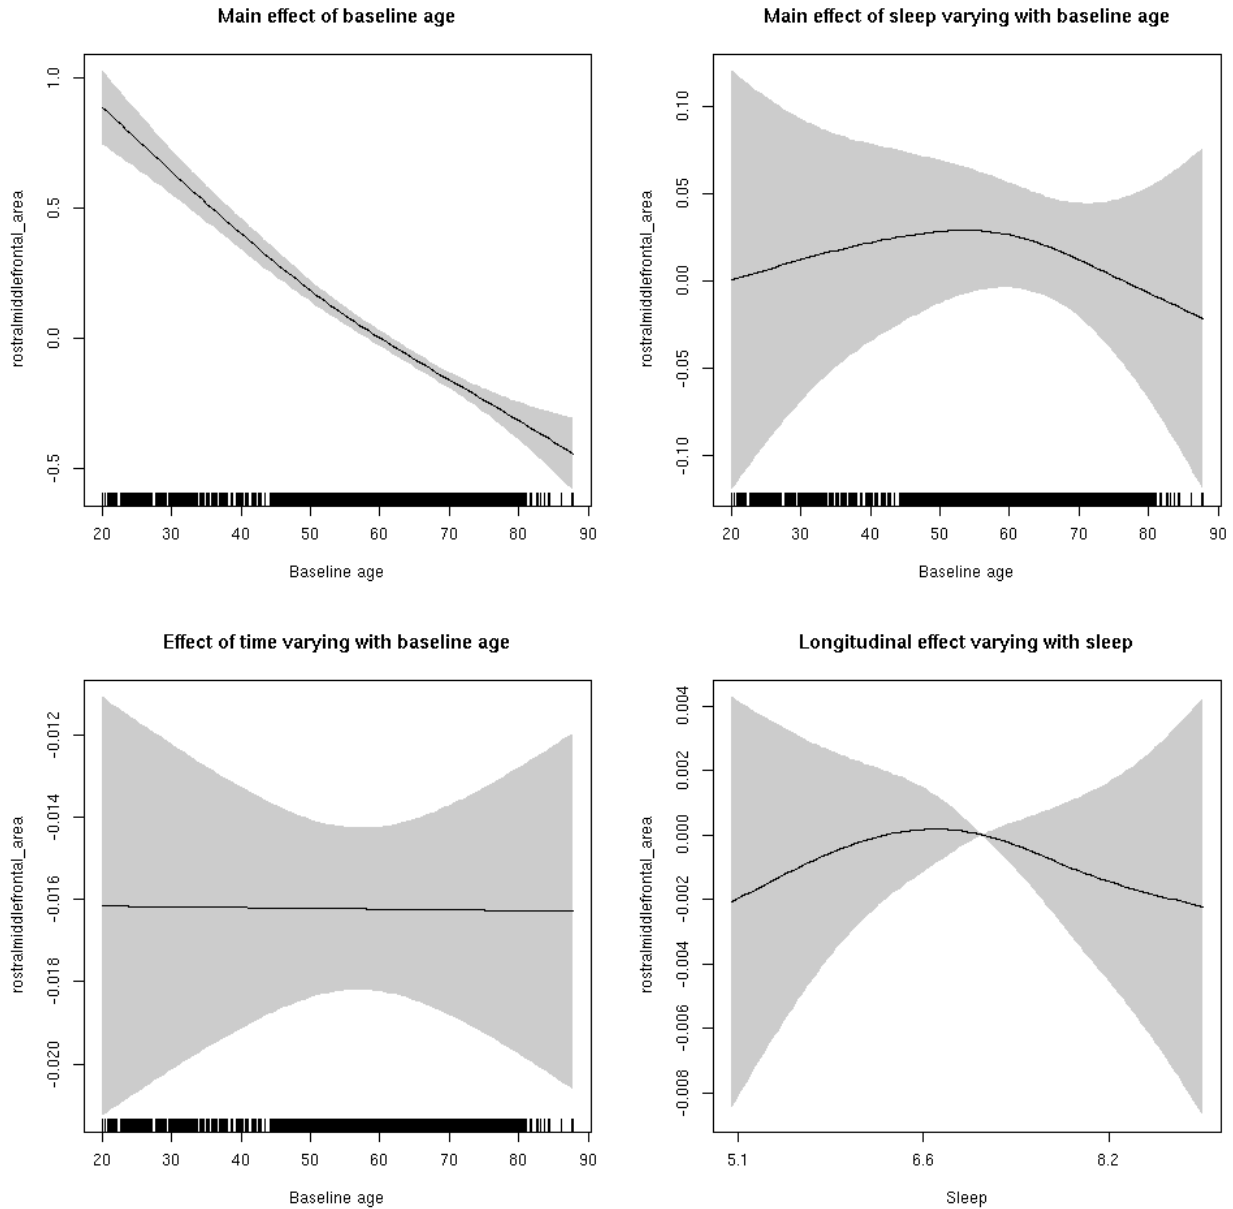

## rostralmiddlefrontal\_thickness: Stratified by sex

**Female: Full data** Below is the row for `s(sleep_z):time` from the model output.

```
## s(sleep_z):time  1.000  1.000  0.239  0.625
```

Below are plots of a plot of `s(bl_age)`, `s(bl_age):sleep_z`, `s(bl_age):time`, and `s(sleep_z):time`. For `s(sleep_z):time`, roughly, if we cannot fit a straight line through the confidence bands, there is evidence that the effect of time depends on sleep duration. It is correct that the confidence interval is zero at one point along the axis; this happens because we do not include the main effect.

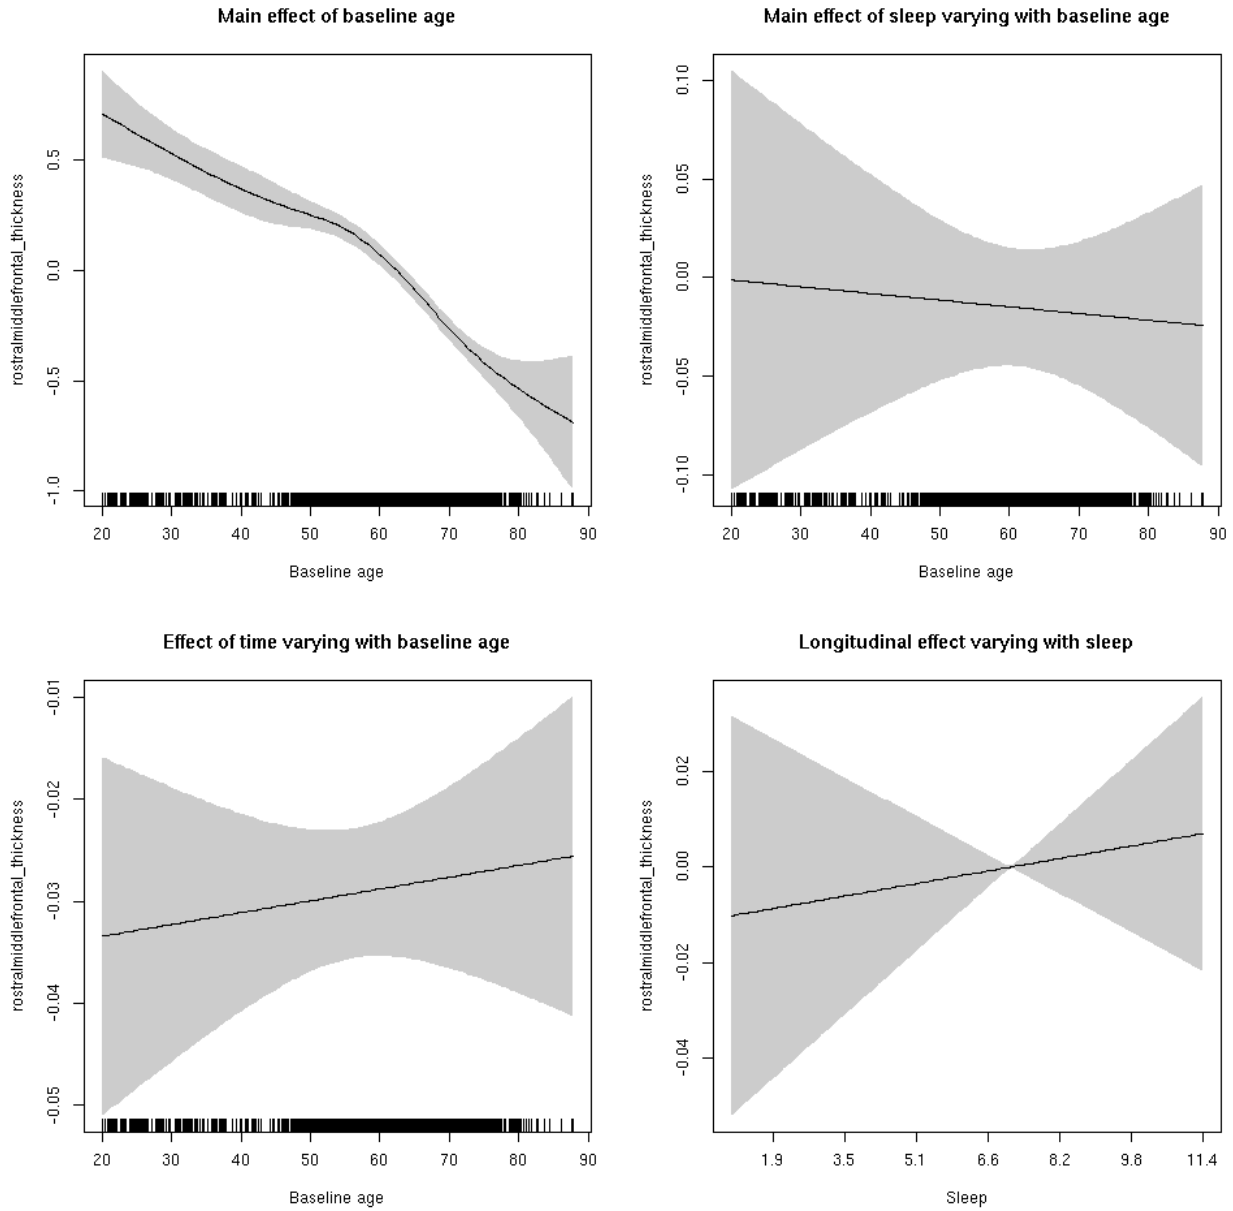

**Male: Full data** Below is the row for `s(sleep_z):time` from the model output.

```
## s(sleep_z):time  2.940  2.940  2.505  0.0451 *
```

Below are plots of a plot of `s(bl_age)`, `s(bl_age):sleep_z`, `s(bl_age):time`, and `s(sleep_z):time`. For `s(sleep_z):time`, roughly, if we cannot fit a straight line through the confidence bands, there is evidence that the effect of time depends on sleep duration. It is correct that the confidence interval is zero at one point along the axis; this happens because we do not include the main effect.



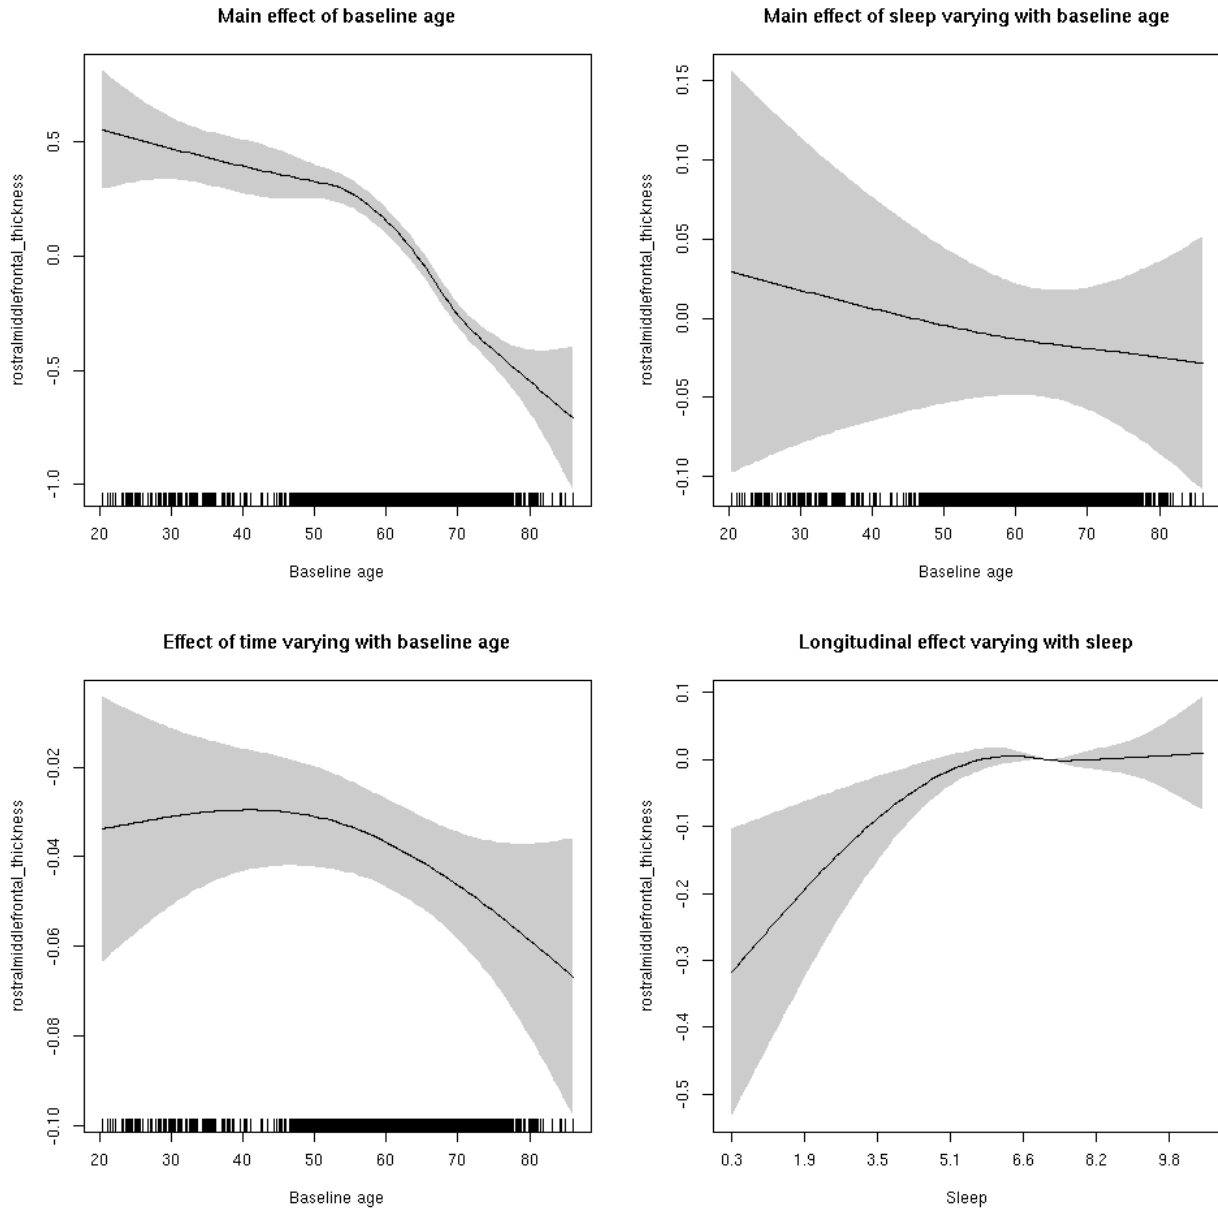

## rostralmiddlefrontal\_thickness

**Full data** Below is the model output. The term `s(sleep_z):time` is probably what we care most about.

```
##
## Family: gaussian
## Link function: identity
##
## Formula:
## value ~ sex + site + s(bl_age, k = 10, bs = "cr") + s(bl_age,
##   by = sleep_z, bs = "cr") + +s(bl_age, by = time, k = 5, bs = "cr") +
##   s(sleep_z, by = time, k = 5, bs = "cr", pc = 0)
## <environment: 0x5630035d3880>
```

```

##
## Parametric coefficients:
##           Estimate Std. Error t value Pr(>|t|)
## (Intercept) -1.89118    0.04196 -45.076 < 2e-16 ***
## sexmale      0.05932    0.02098   2.828  0.00470 **
## siteousAvanto 0.18758    0.05563   3.372  0.00075 ***
## siteousPrisma 0.49185    0.23390   2.103  0.03551 *
## siteousSkyra -0.36322    0.05564  -6.529 7.03e-11 ***
## siteUB       0.61863    0.11110   5.568 2.65e-08 ***
## siteUCAM     0.40727    0.05805   7.016 2.47e-12 ***
## siteUKB      2.17533    0.04263  51.027 < 2e-16 ***
## siteUmU     -0.18132    0.06902  -2.627  0.00863 **
## ---
## Signif. codes:  0 '***' 0.001 '**' 0.01 '*' 0.05 '.' 0.1 ' ' 1
##
## Approximate significance of smooth terms:
##           edf Ref.df      F p-value
## s(bl_age)      5.192  5.192 119.589 <2e-16 ***
## s(bl_age):sleep_z 2.000  2.000   1.268  0.2816
## s(bl_age):time  2.462  2.462  51.087 <2e-16 ***
## s(sleep_z):time  3.309  3.309   3.063  0.0131 *
## ---
## Signif. codes:  0 '***' 0.001 '**' 0.01 '*' 0.05 '.' 0.1 ' ' 1
##
## R-sq.(adj) =  0.689
## lmer.REML = 12513  Scale est. = 0.093526  n = 8164

```

Below are plots of a plot of `s(bl_age)`, `s(bl_age):sleep_z`, `s(bl_age):time`, and `s(sleep_z):time`. For `s(sleep_z):time`, roughly, if we cannot fit a straight line through the confidence bands, there is evidence that the effect of time depends on sleep duration. It is correct that the confidence interval is zero at one point along the axis; this happens because we do not include the main effect.

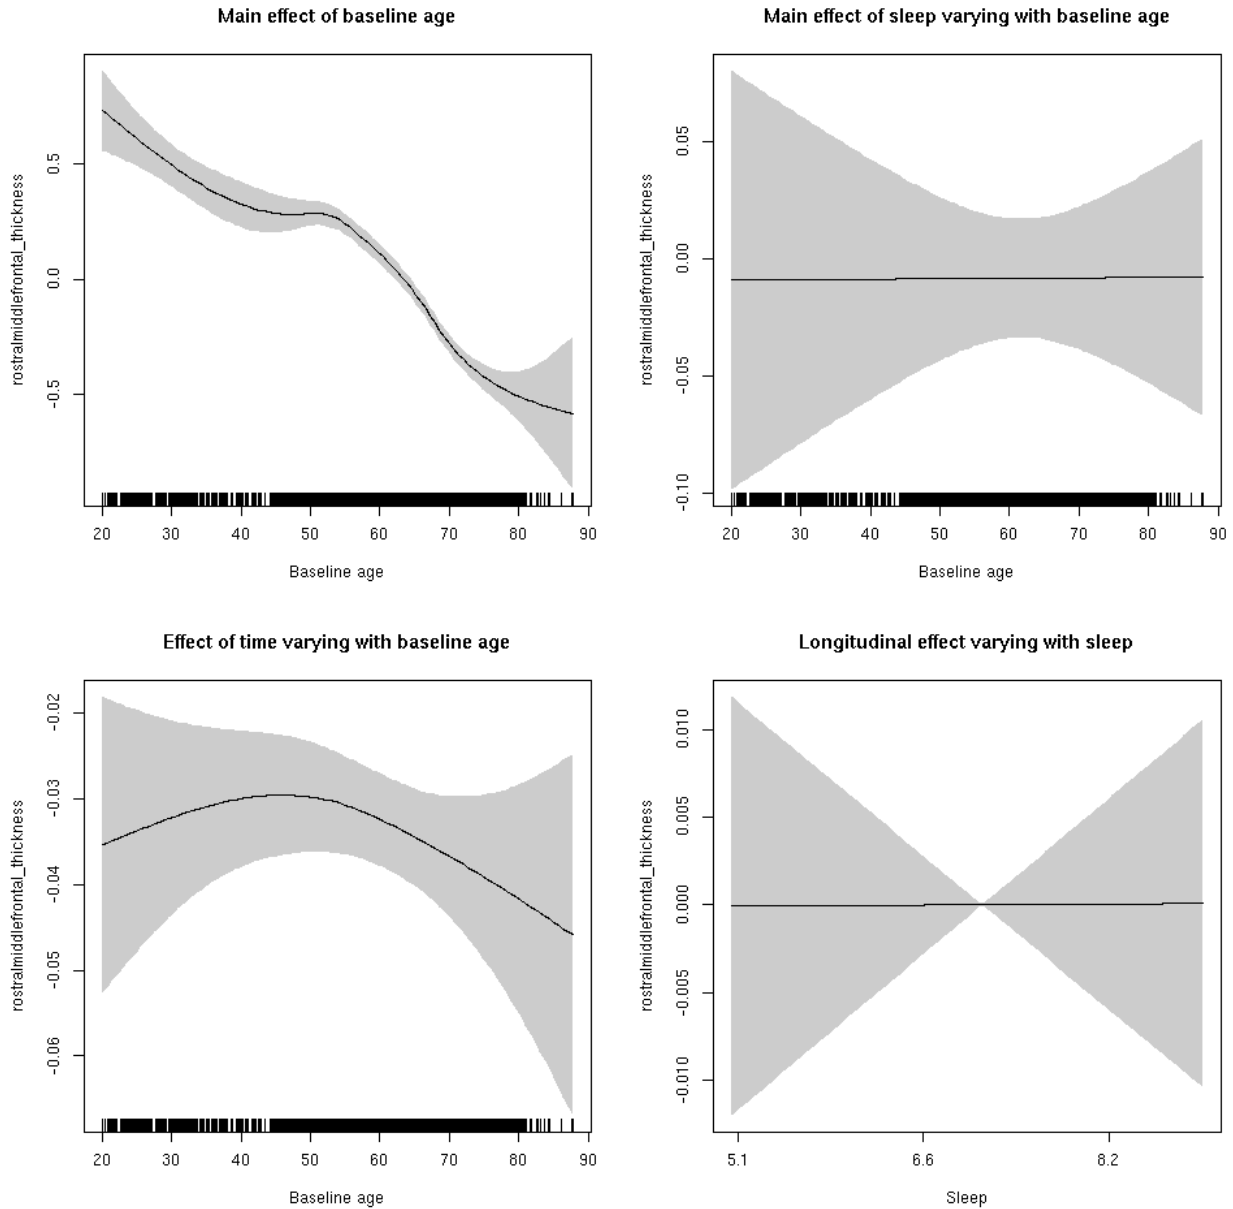

**Restricted to sleep  $\geq 5$  and  $\leq 9$  hours** Below is the row for `s(sleep_z):time` from the model output.

```
## s(sleep_z):time  1.000  1.000  0.000  0.990
```

Below are plots of a plot of `s(bl_age)`, `s(bl_age):sleep_z`, `s(bl_age):time`, and `s(sleep_z):time`. For `s(sleep_z):time`, roughly, if we cannot fit a straight line through the confidence bands, there is evidence that the effect of time depends on sleep duration. It is correct that the confidence interval is zero at one point along the axis; this happens because we do not include the main effect.

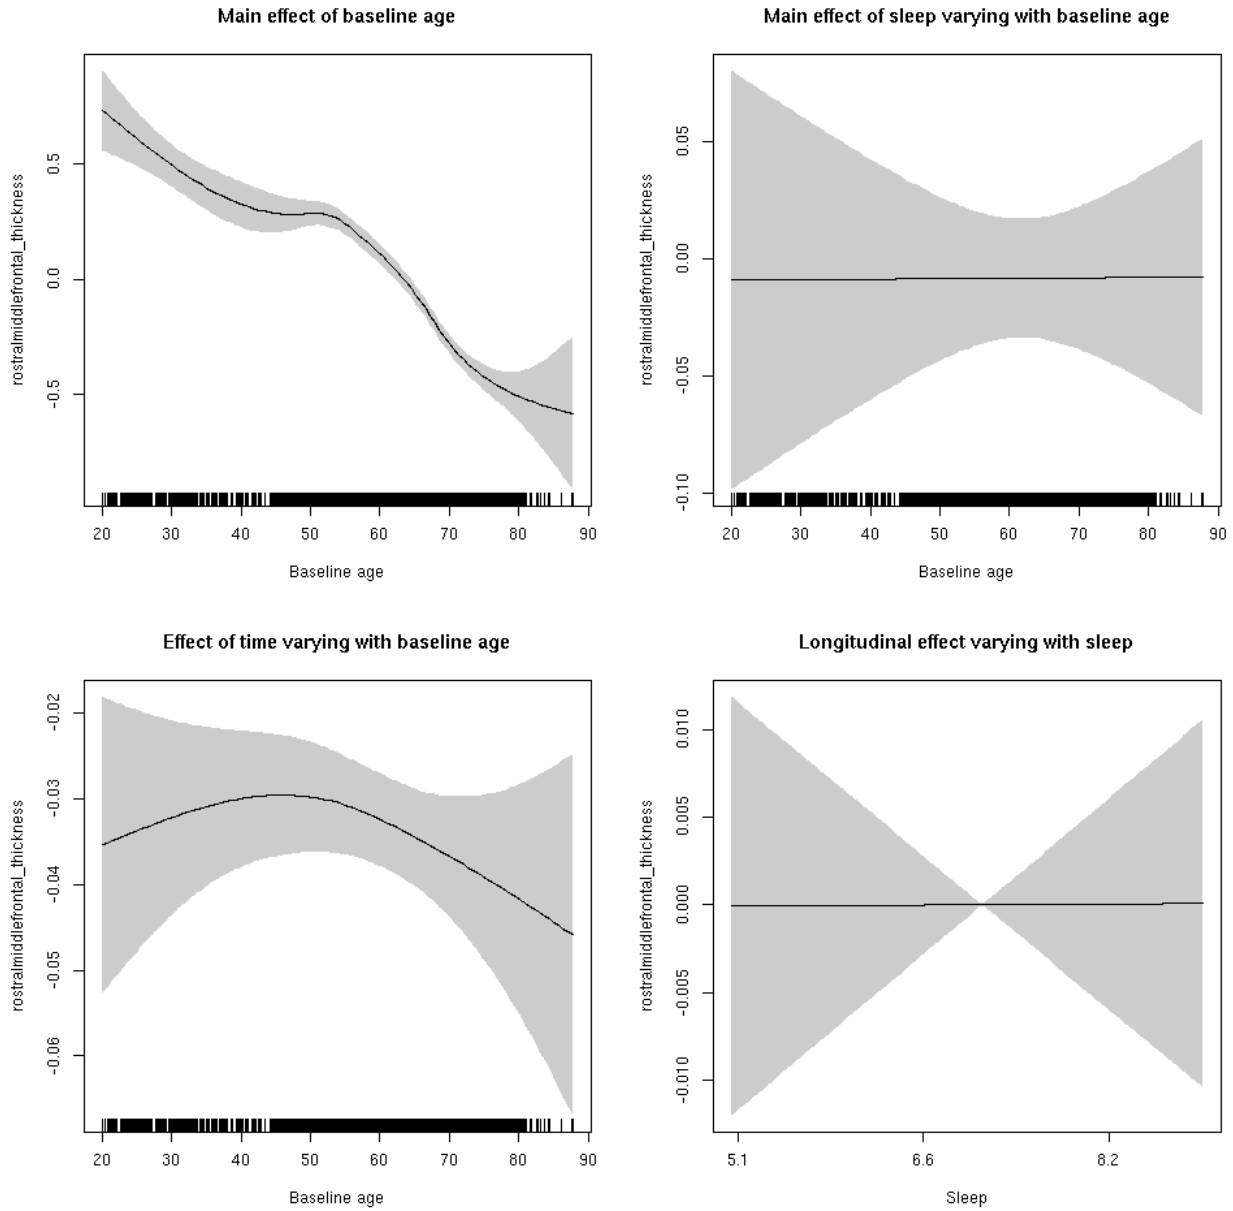

## rostralmiddlefrontal\_volume: Stratified by sex

**Female: Full data** Below is the row for `s(sleep_z):time` from the model output.

```
## s(sleep_z):time  1.000  1.000  0.011  0.917
```

Below are plots of a plot of `s(bl_age)`, `s(bl_age):sleep_z`, `s(bl_age):time`, and `s(sleep_z):time`. For `s(sleep_z):time`, roughly, if we cannot fit a straight line through the confidence bands, there is evidence that the effect of time depends on sleep duration. It is correct that the confidence interval is zero at one point along the axis; this happens because we do not include the main effect.

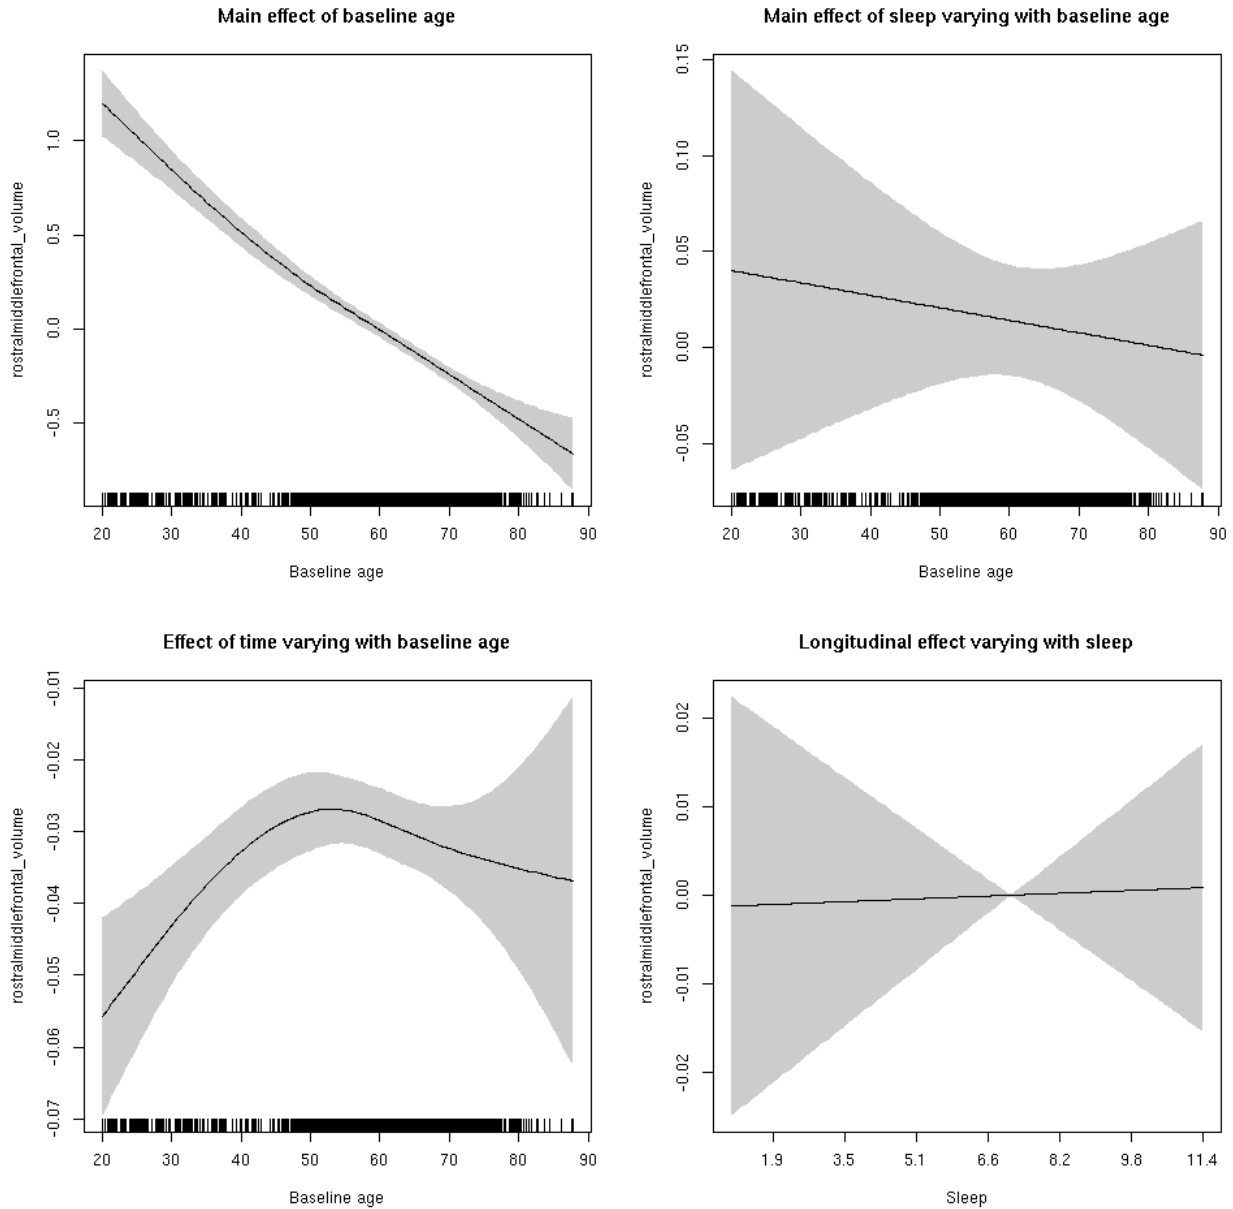

**Male: Full data** Below is the row for `s(sleep_z):time` from the model output.

```
## s(sleep_z):time  1.000  1.000  1.041  0.308
```

Below are plots of a plot of `s(bl_age)`, `s(bl_age):sleep_z`, `s(bl_age):time`, and `s(sleep_z):time`. For `s(sleep_z):time`, roughly, if we cannot fit a straight line through the confidence bands, there is evidence that the effect of time depends on sleep duration. It is correct that the confidence interval is zero at one point along the axis; this happens because we do not include the main effect.

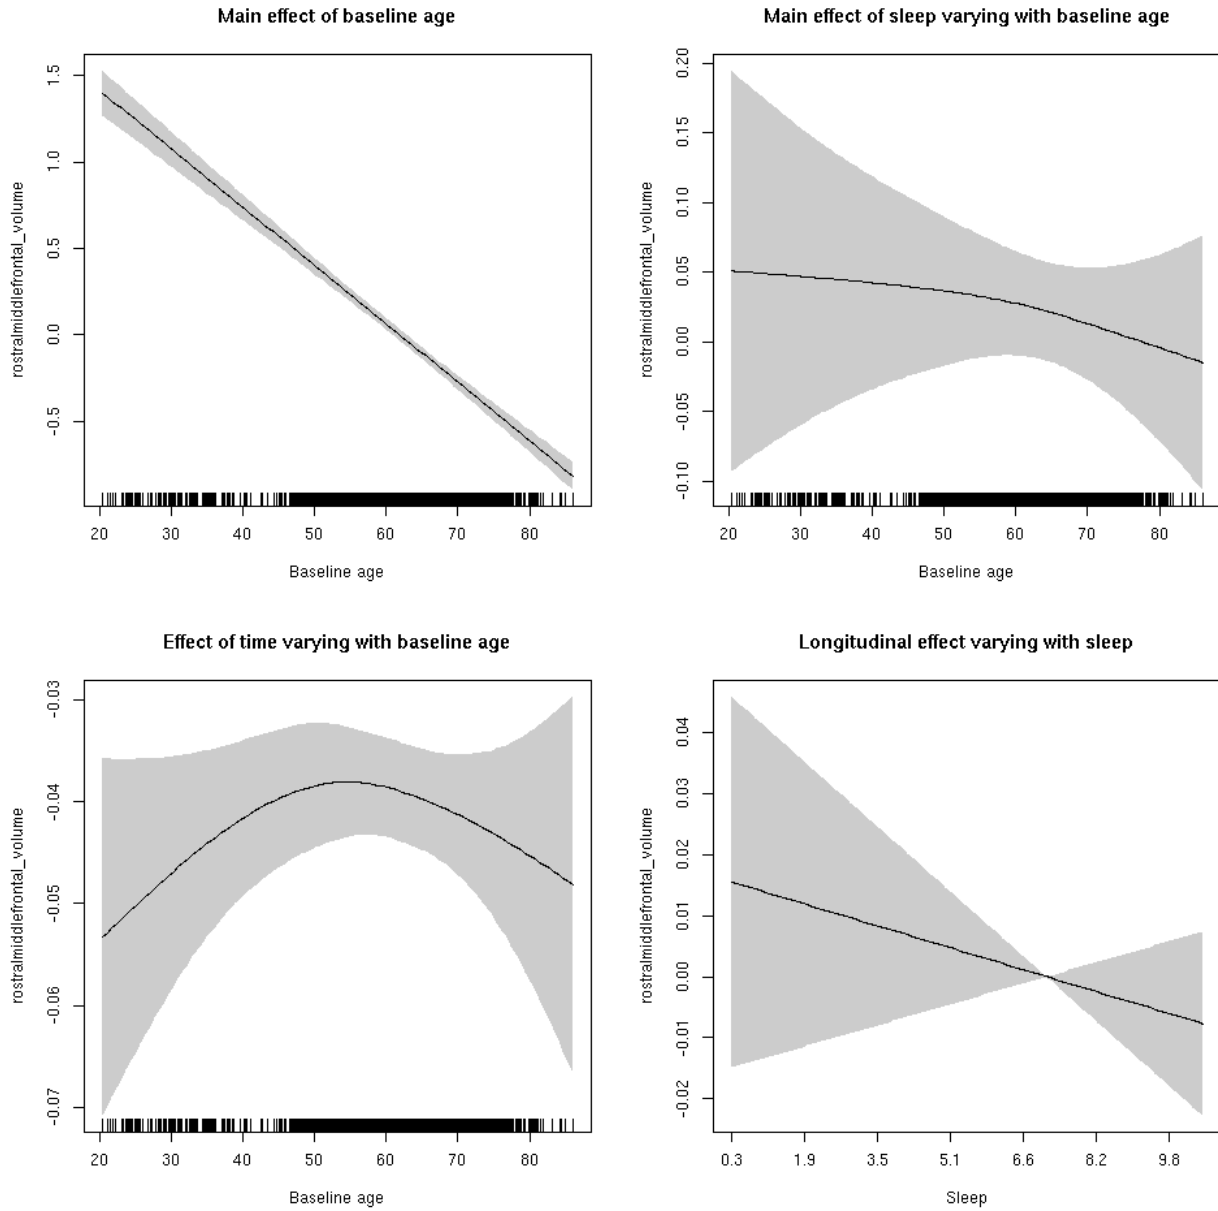

## rostralmiddlefrontal\_volume

**Full data** Below is the model output. The term `s(sleep_z):time` is probably what we care most about.

```
##
## Family: gaussian
## Link function: identity
##
## Formula:
## value ~ sex + site + icv + s(bl_age, k = 10, bs = "cr") + s(bl_age,
##   by = sleep_z, bs = "cr") + +s(bl_age, by = time, k = 5, bs = "cr") +
##   s(sleep_z, by = time, k = 5, bs = "cr", pc = 0)
## <environment: 0x5630035ac108>
```

```

##
## Parametric coefficients:
##           Estimate Std. Error t value Pr(>|t|)
## (Intercept)  0.24198    0.05062   4.780 1.78e-06 ***
## sexmale      0.23556    0.02610   9.025 < 2e-16 ***
## siteousAvanto -0.90866    0.06197 -14.664 < 2e-16 ***
## siteousPrisma -0.71842    0.14718  -4.881 1.07e-06 ***
## siteousSkyra  -0.83979    0.06000 -13.996 < 2e-16 ***
## siteUB       -0.60093    0.11671  -5.149 2.68e-07 ***
## siteUCAM     -0.87276    0.06262 -13.938 < 2e-16 ***
## siteUKB      -0.20719    0.04783  -4.332 1.49e-05 ***
## siteUmU      -0.36971    0.07229  -5.114 3.22e-07 ***
## icv          0.58973    0.01284  45.930 < 2e-16 ***
## ---
## Signif. codes:  0 '***' 0.001 '**' 0.01 '*' 0.05 '.' 0.1 ' ' 1
##
## Approximate significance of smooth terms:
##           edf Ref.df      F p-value
## s(bl_age)      2.123  2.123 407.921 <2e-16 ***
## s(bl_age):sleep_z 2.673  2.673   0.936  0.2897
## s(bl_age):time  3.425  3.425 116.222 <2e-16 ***
## s(sleep_z):time  3.256  3.256   2.159  0.0452 *
## ---
## Signif. codes:  0 '***' 0.001 '**' 0.01 '*' 0.05 '.' 0.1 ' ' 1
##
## R-sq.(adj) =  0.565
## lmer.REML = 7913.8  Scale est. = 0.030008  n = 8168

```

Below are plots of a plot of `s(bl_age)`, `s(bl_age):sleep_z`, `s(bl_age):time`, and `s(sleep_z):time`. For `s(sleep_z):time`, roughly, if we cannot fit a straight line through the confidence bands, there is evidence that the effect of time depends on sleep duration. It is correct that the confidence interval is zero at one point along the axis; this happens because we do not include the main effect.

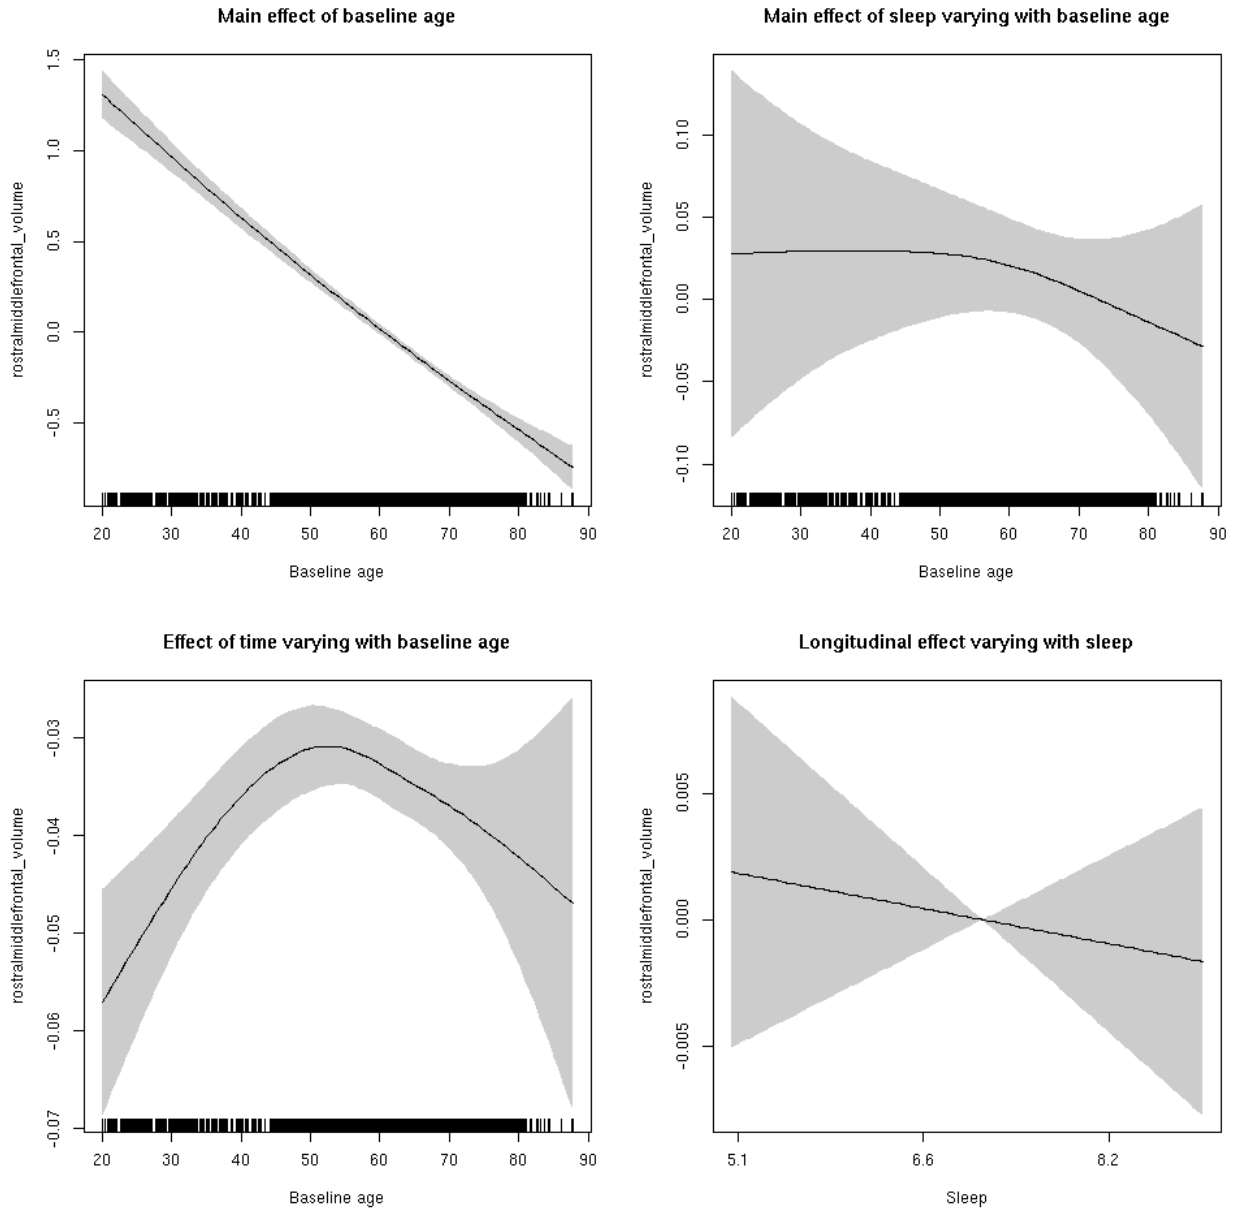

**Restricted to sleep  $\geq 5$  and  $\leq 9$  hours** Below is the row for `s(sleep_z):time` from the model output.

```
## s(sleep_z):time  1.000  1.000  0.295  0.587
```

Below are plots of a plot of `s(bl_age)`, `s(bl_age):sleep_z`, `s(bl_age):time`, and `s(sleep_z):time`. For `s(sleep_z):time`, roughly, if we cannot fit a straight line through the confidence bands, there is evidence that the effect of time depends on sleep duration. It is correct that the confidence interval is zero at one point along the axis; this happens because we do not include the main effect.





### superiorfrontal\_area: Stratified by sex

**Female: Full data** Below is the row for `s(sleep_z):time` from the model output.

```
## s(sleep_z):time  1.000  1.000  0.053  0.817
```

Below are plots of a plot of `s(bl_age)`, `s(bl_age):sleep_z`, `s(bl_age):time`, and `s(sleep_z):time`. For `s(sleep_z):time`, roughly, if we cannot fit a straight line through the confidence bands, there is evidence that the effect of time depends on sleep duration. It is correct that the confidence interval is zero at one point along the axis; this happens because we do not include the main effect.

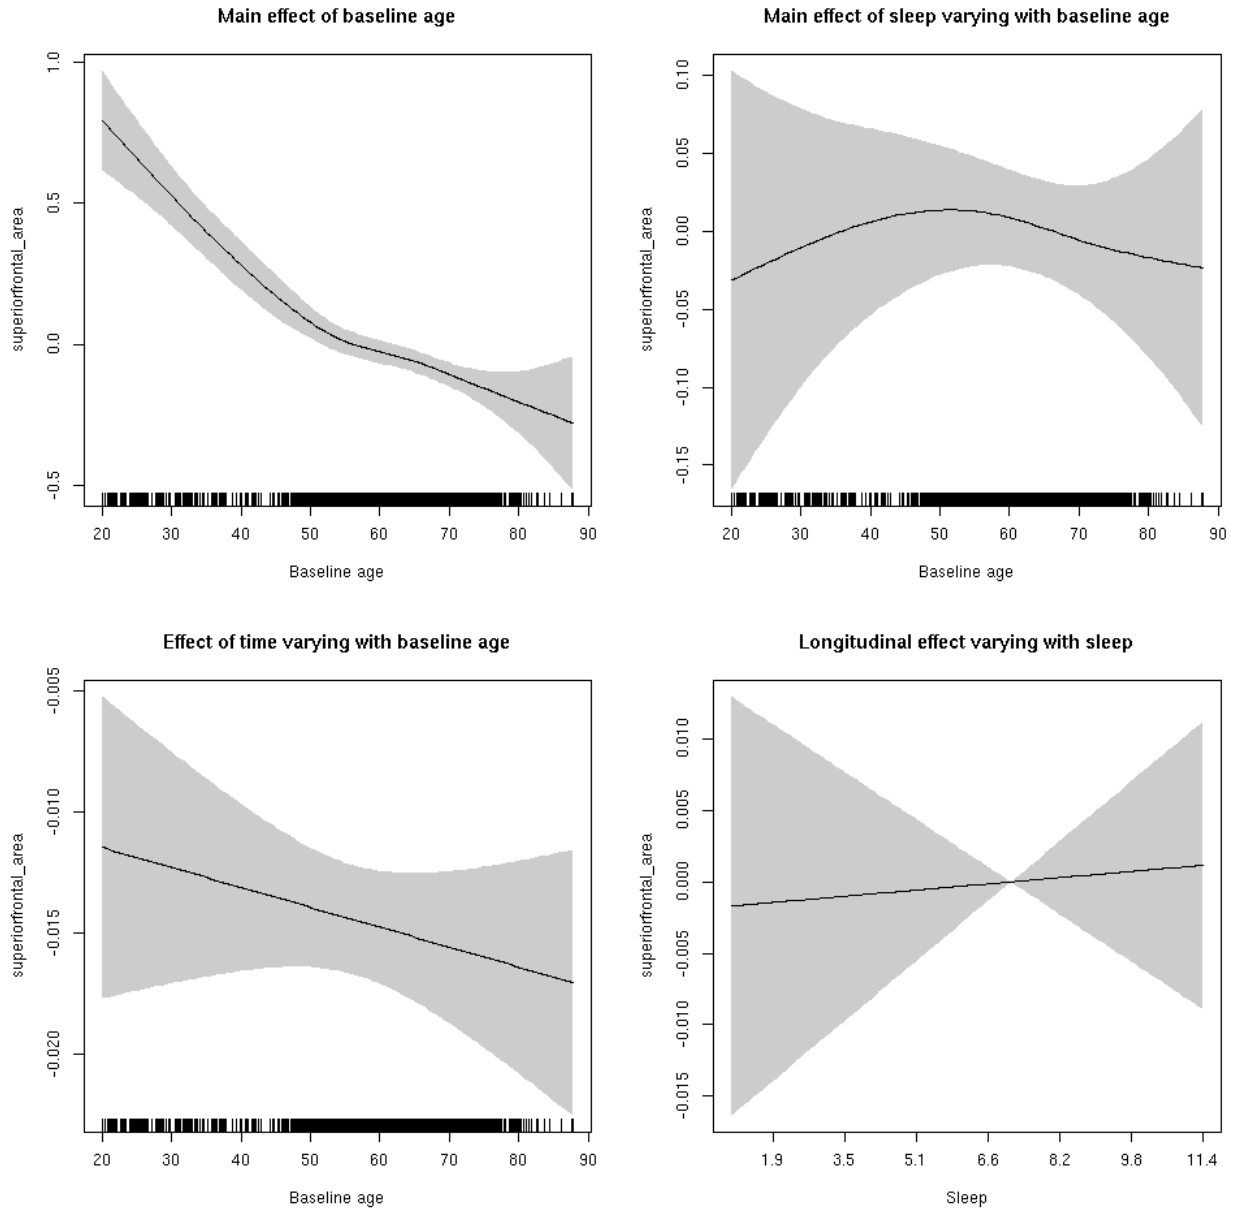

**Male: Full data** Below is the row for `s(sleep_z):time` from the model output.

```
## s(sleep_z):time  1.000  1.000  0.029  0.865
```

Below are plots of a plot of `s(bl_age)`, `s(bl_age):sleep_z`, `s(bl_age):time`, and `s(sleep_z):time`. For `s(sleep_z):time`, roughly, if we cannot fit a straight line through the confidence bands, there is evidence that the effect of time depends on sleep duration. It is correct that the confidence interval is zero at one point along the axis; this happens because we do not include the main effect.

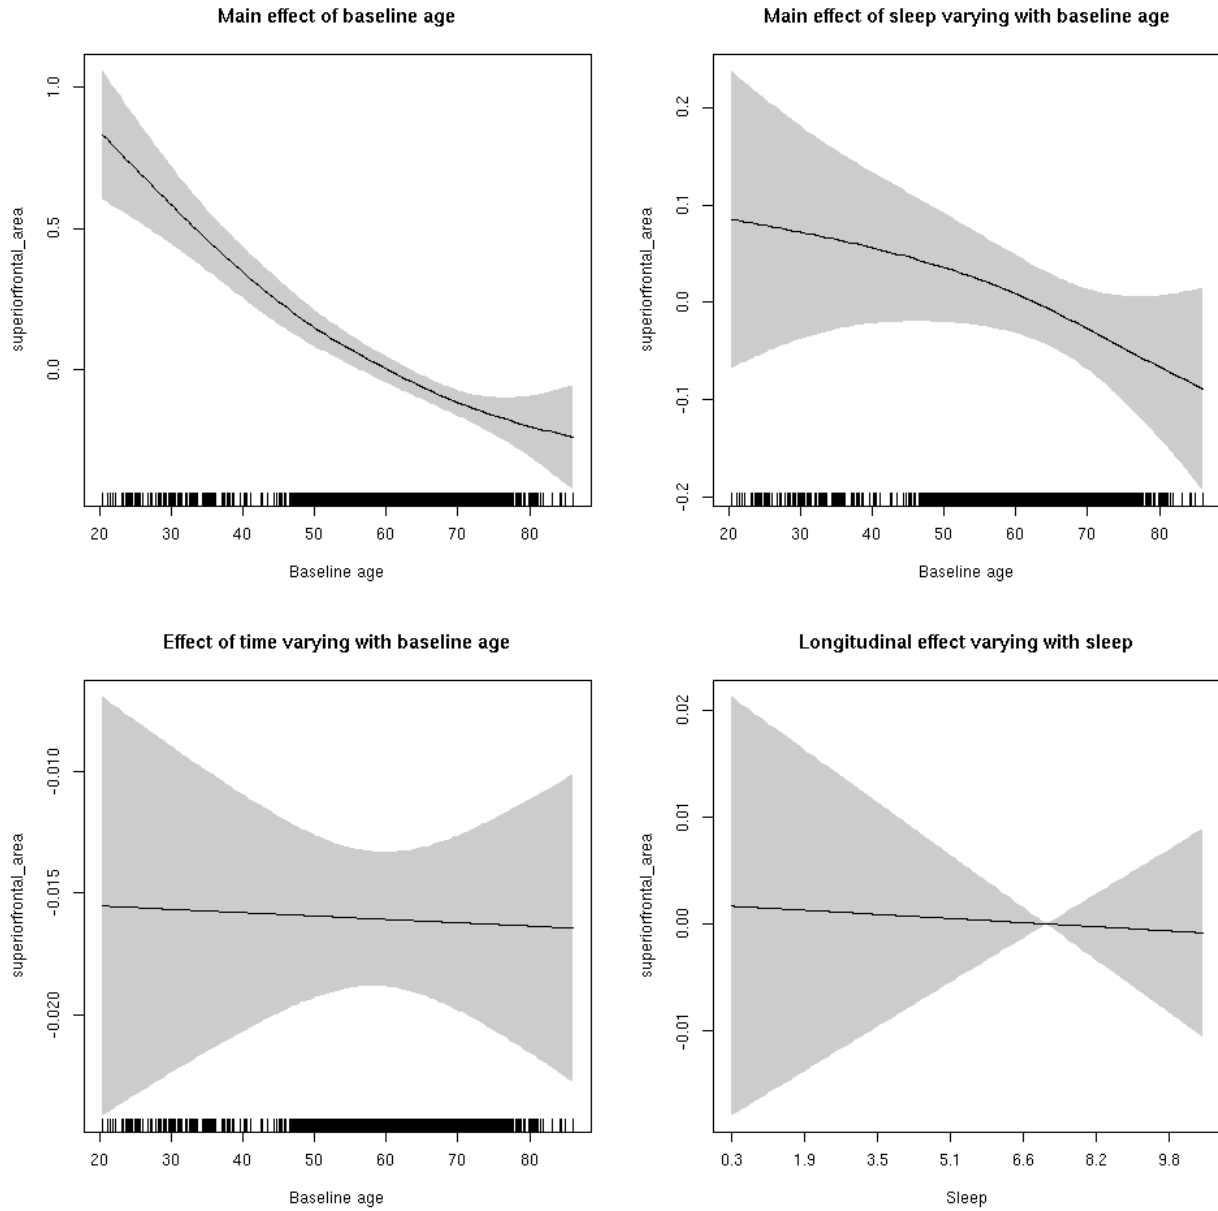

## superiorfrontal\_area

**Full data** Below is the model output. The term `s(sleep_z):time` is probably what we care most about.

```
##
## Family: gaussian
## Link function: identity
##
## Formula:
## value ~ sex + site + icv + s(bl_age, k = 10, bs = "cr") + s(bl_age,
##   by = sleep_z, bs = "cr") + +s(bl_age, by = time, k = 5, bs = "cr") +
##   s(sleep_z, by = time, k = 5, bs = "cr", pc = 0)
## <environment: 0x5630035b3ae8>
```

```

##
## Parametric coefficients:
##           Estimate Std. Error t value Pr(>|t|)
## (Intercept)  0.90008    0.04992  18.032 < 2e-16 ***
## sexmale      0.20567    0.02568   8.010 1.30e-15 ***
## siteousAvanto -0.86455    0.06076 -14.229 < 2e-16 ***
## siteousPrisma -0.97681    0.10577  -9.236 < 2e-16 ***
## siteousSkyra  -0.73426    0.05891 -12.465 < 2e-16 ***
## siteUB       -0.81673    0.11569  -7.060 1.81e-12 ***
## siteUCAM     -0.74582    0.06212 -12.007 < 2e-16 ***
## siteUKB      -0.98916    0.04748 -20.834 < 2e-16 ***
## siteUmU      -0.23033    0.07150  -3.221 0.00128 **
## icv          0.67458    0.01247  54.077 < 2e-16 ***
## ---
## Signif. codes:  0 '***' 0.001 '**' 0.01 '*' 0.05 '.' 0.1 ' ' 1
##
## Approximate significance of smooth terms:
##           edf Ref.df      F p-value
## s(bl_age)      3.095  3.095  72.539 <2e-16 ***
## s(bl_age):sleep_z 2.992  2.992   1.767  0.133
## s(bl_age):time  2.000  2.000 149.712 <2e-16 ***
## s(sleep_z):time  1.000  1.000   0.010  0.921
## ---
## Signif. codes:  0 '***' 0.001 '**' 0.01 '*' 0.05 '.' 0.1 ' ' 1
##
## R-sq.(adj) =  0.585
## lmer.REML = 3962.1  Scale est. = 0.012158  n = 8144

```

Below are plots of a plot of `s(bl_age)`, `s(bl_age):sleep_z`, `s(bl_age):time`, and `s(sleep_z):time`. For `s(sleep_z):time`, roughly, if we cannot fit a straight line through the confidence bands, there is evidence that the effect of time depends on sleep duration. It is correct that the confidence interval is zero at one point along the axis; this happens because we do not include the main effect.

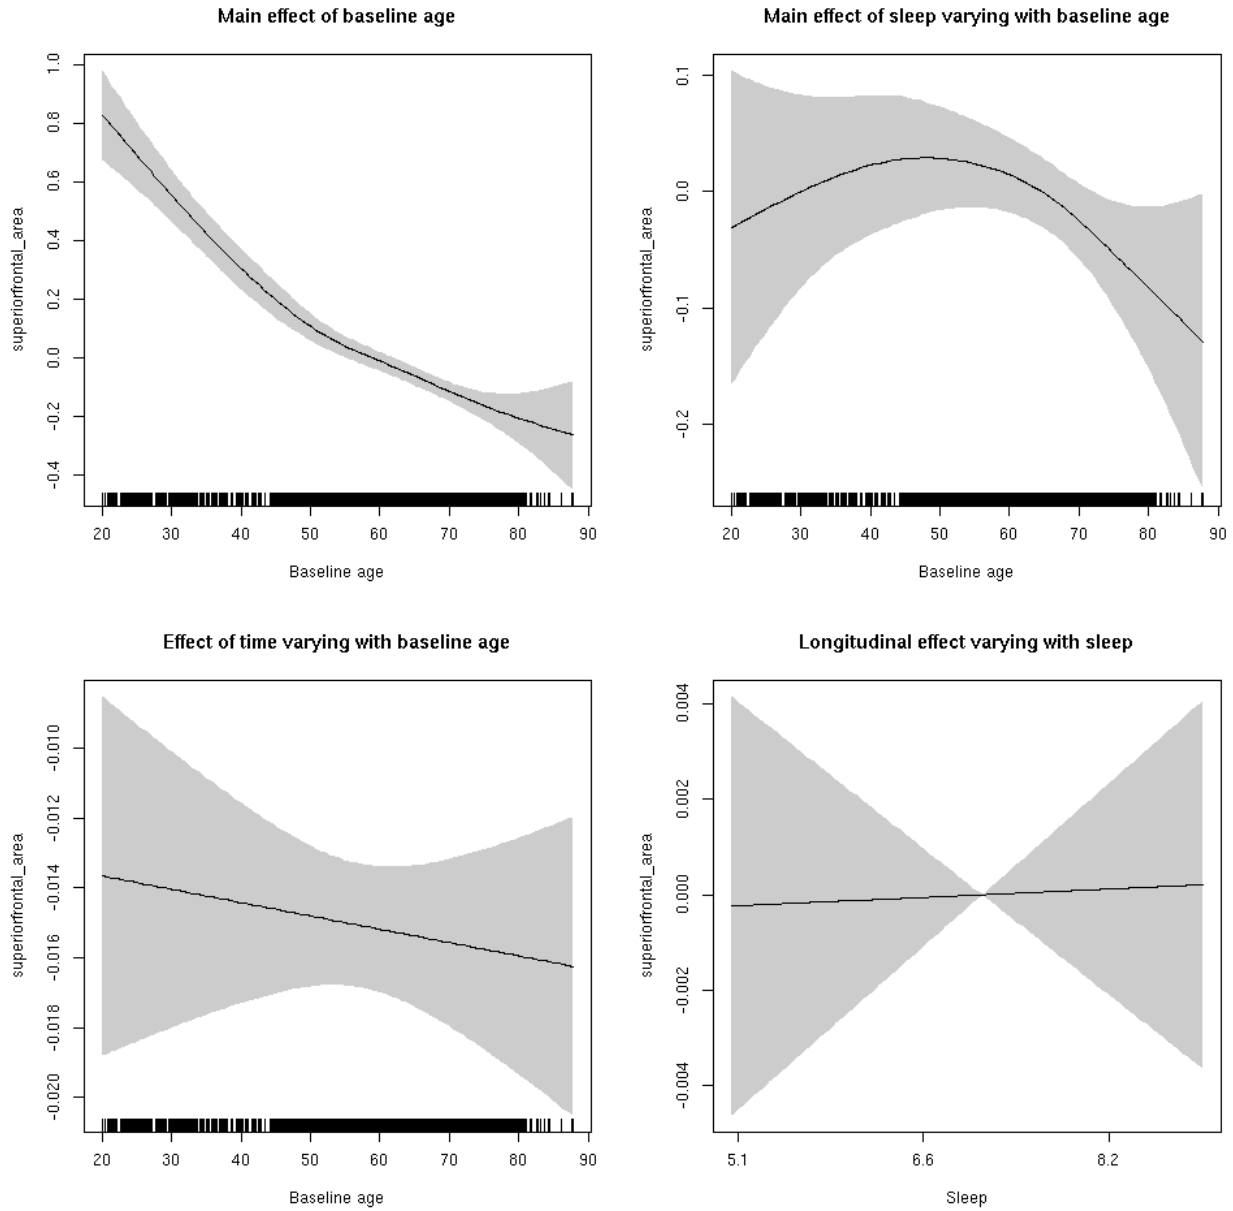

**Restricted to sleep  $\geq 5$  and  $\leq 9$  hours** Below is the row for `s(sleep_z):time` from the model output.

```
## s(sleep_z):time  1.000  1.000  0.012  0.9137
```

Below are plots of a plot of `s(bl_age)`, `s(bl_age):sleep_z`, `s(bl_age):time`, and `s(sleep_z):time`. For `s(sleep_z):time`, roughly, if we cannot fit a straight line through the confidence bands, there is evidence that the effect of time depends on sleep duration. It is correct that the confidence interval is zero at one point along the axis; this happens because we do not include the main effect.

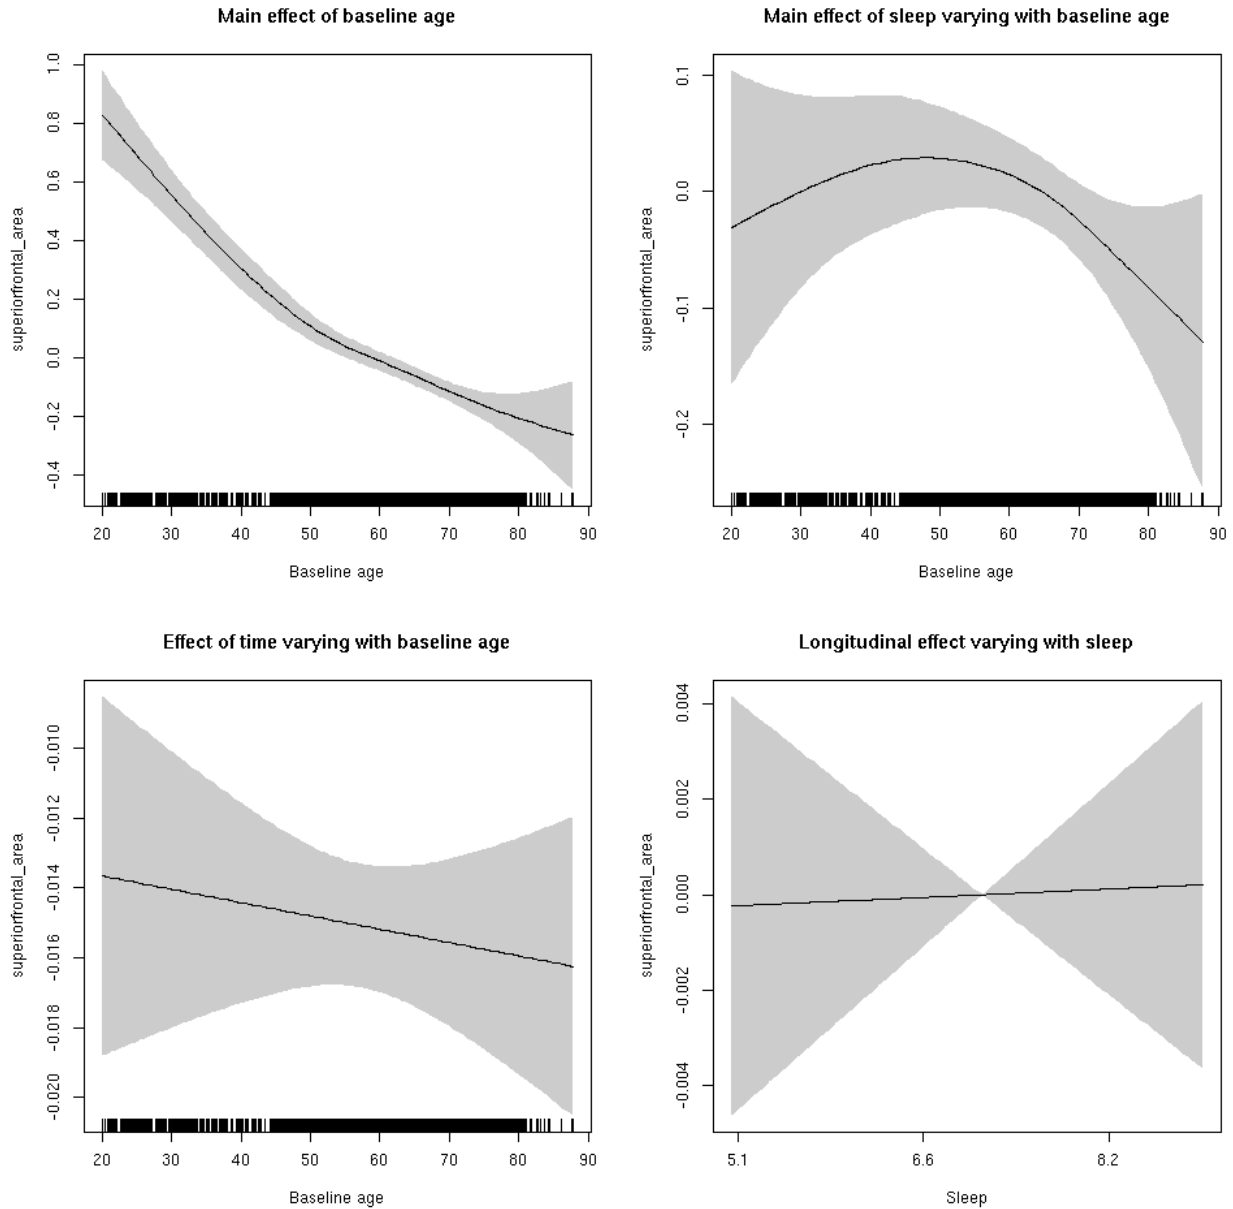

## superiorfrontal\_thickness: Stratified by sex

**Female: Full data** Below is the row for `s(sleep_z):time` from the model output.

```
## s(sleep_z):time  1.000  1.000  0.210  0.647
```

Below are plots of a plot of `s(bl_age)`, `s(bl_age):sleep_z`, `s(bl_age):time`, and `s(sleep_z):time`. For `s(sleep_z):time`, roughly, if we cannot fit a straight line through the confidence bands, there is evidence that the effect of time depends on sleep duration. It is correct that the confidence interval is zero at one point along the axis; this happens because we do not include the main effect.

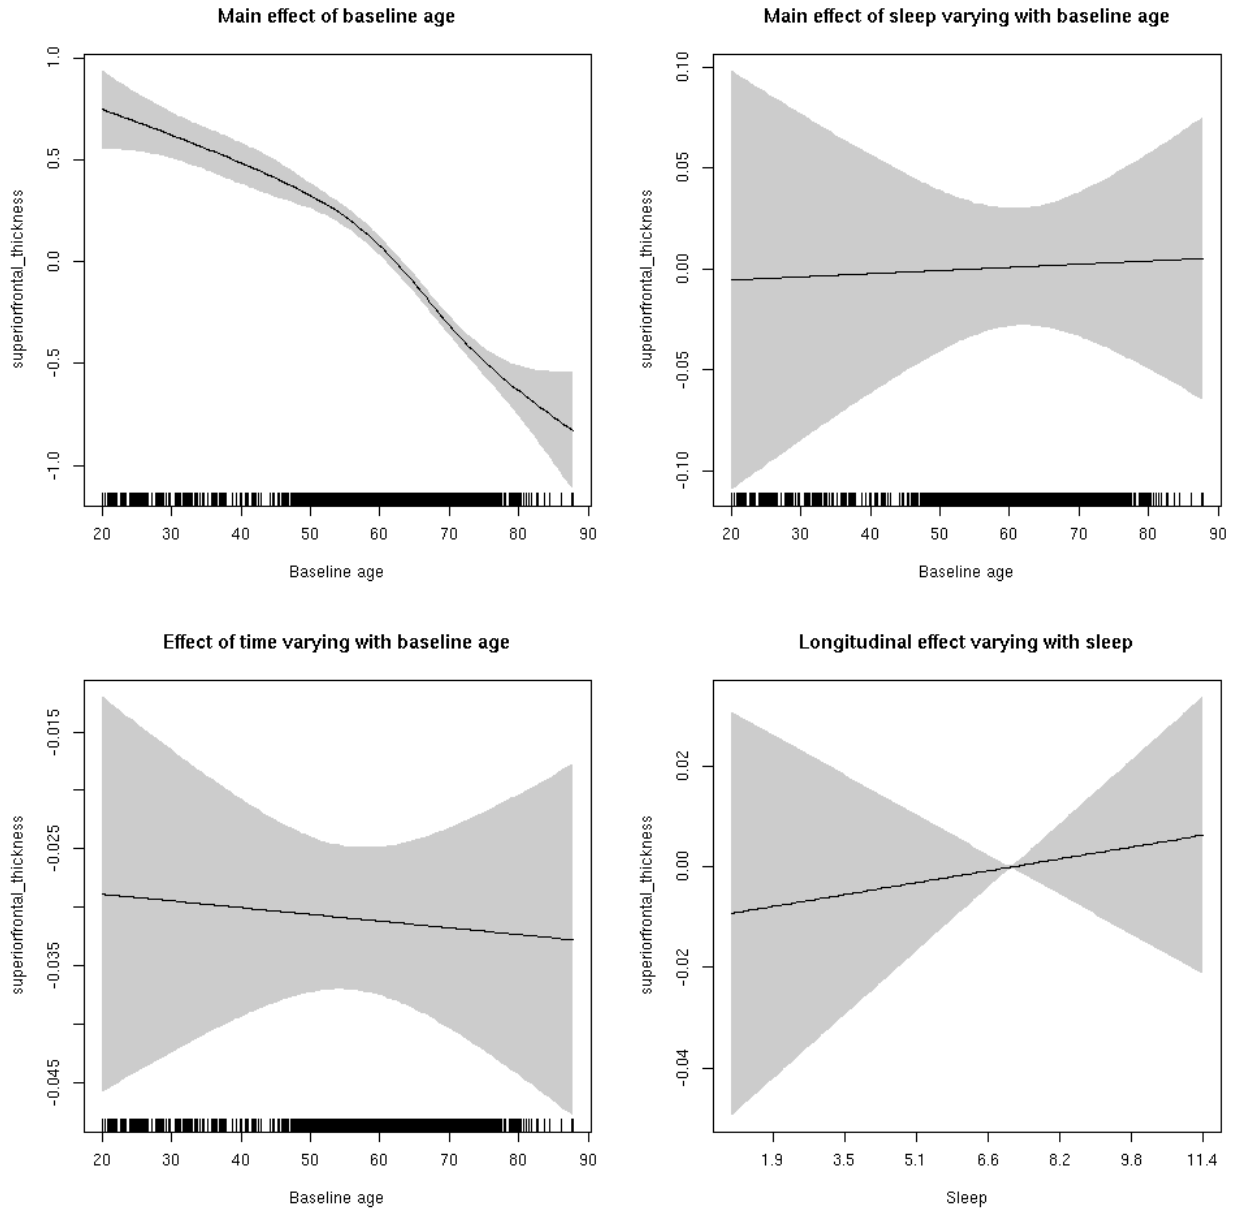

**Male: Full data** Below is the row for `s(sleep_z):time` from the model output.

```
## s(sleep_z):time  1.000  1.000  0.787  0.375
```

Below are plots of a plot of `s(bl_age)`, `s(bl_age):sleep_z`, `s(bl_age):time`, and `s(sleep_z):time`. For `s(sleep_z):time`, roughly, if we cannot fit a straight line through the confidence bands, there is evidence that the effect of time depends on sleep duration. It is correct that the confidence interval is zero at one point along the axis; this happens because we do not include the main effect.

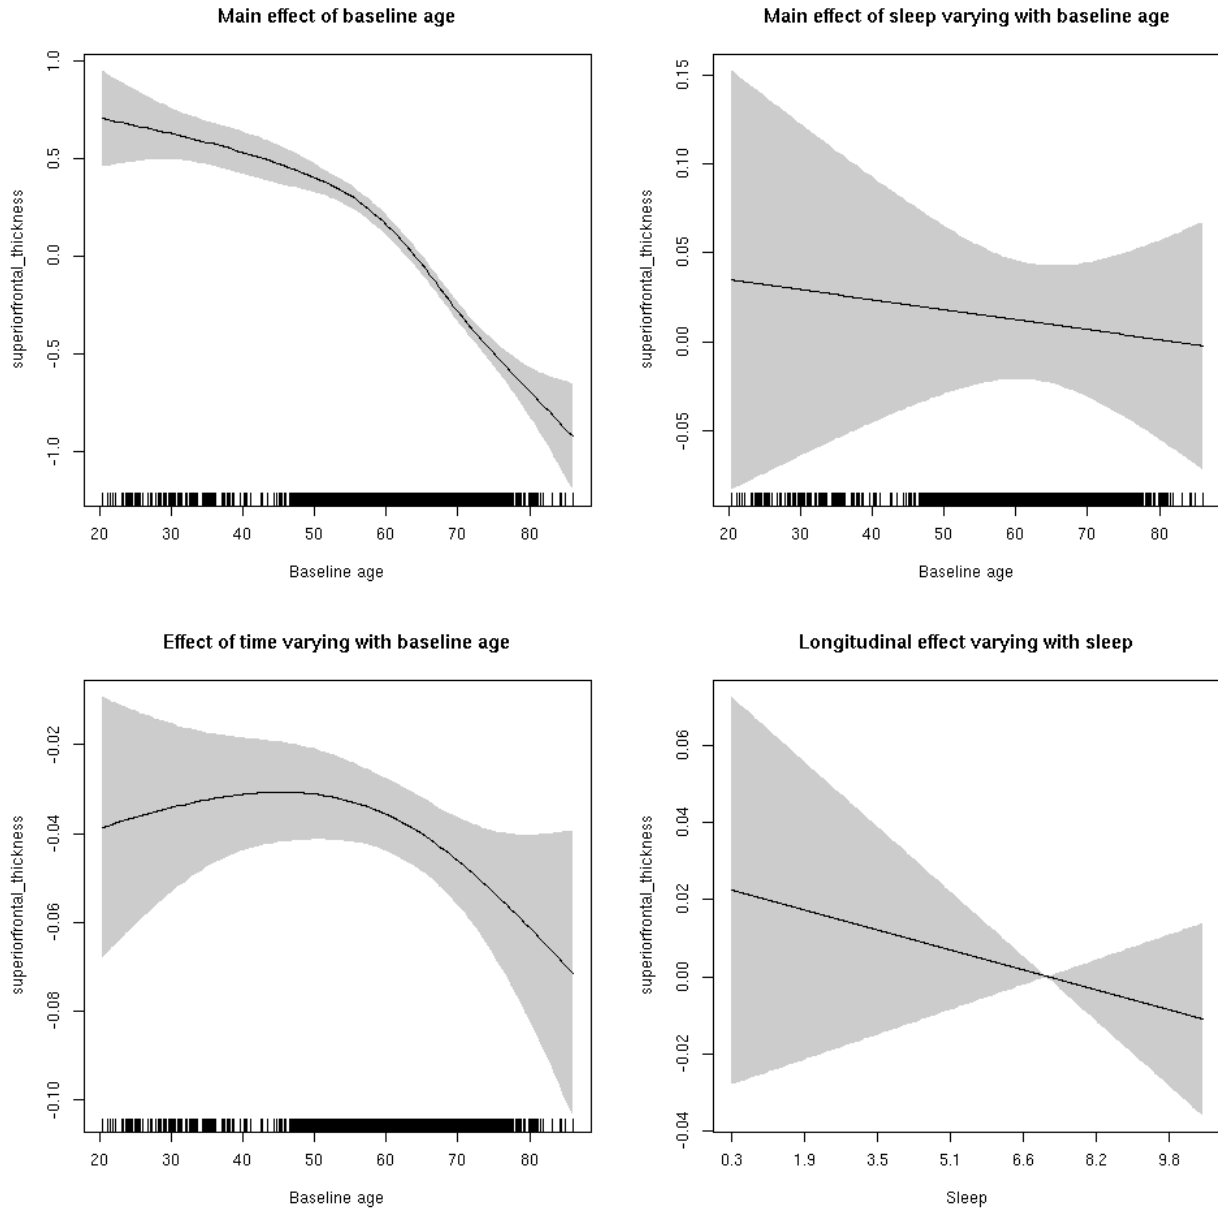

## superiorfrontal\_thickness

**Full data** Below is the model output. The term `s(sleep_z):time` is probably what we care most about.

```
##
## Family: gaussian
## Link function: identity
##
## Formula:
## value ~ sex + site + s(bl_age, k = 10, bs = "cr") + s(bl_age,
##   by = sleep_z, bs = "cr") + +s(bl_age, by = time, k = 5, bs = "cr") +
##   s(sleep_z, by = time, k = 5, bs = "cr", pc = 0)
## <environment: 0x5630035df768>
```



```

##
## Parametric coefficients:
##           Estimate Std. Error t value Pr(>|t|)
## (Intercept) -1.505786  0.041171 -36.574 < 2e-16 ***
## sexmale     -0.085143  0.020599  -4.133 3.61e-05 ***
## siteousAvanto  0.004912  0.054579   0.090 0.928289
## siteousPrisma  0.220276  0.227106   0.970 0.332111
## siteousSkyra -1.039787  0.054573 -19.053 < 2e-16 ***
## siteUB       0.370319  0.109160   3.392 0.000696 ***
## siteUCAM     0.217076  0.056837   3.819 0.000135 ***
## siteUKB     1.893367  0.041802  45.294 < 2e-16 ***
## siteUmU     -0.282255  0.067778  -4.164 3.15e-05 ***
## ---
## Signif. codes:  0 '***' 0.001 '**' 0.01 '*' 0.05 '.' 0.1 ' ' 1
##
## Approximate significance of smooth terms:
##           edf Ref.df      F p-value
## s(bl_age)      4.536  4.536 198.433 <2e-16 ***
## s(bl_age):sleep_z 2.000  2.000   0.153  0.859
## s(bl_age):time  2.841  2.841  52.271 <2e-16 ***
## s(sleep_z):time  2.308  2.308   1.886  0.280
## ---
## Signif. codes:  0 '***' 0.001 '**' 0.01 '*' 0.05 '.' 0.1 ' ' 1
##
## R-sq.(adj) =  0.699
## lmer.REML = 12117  Scale est. = 0.087886  n = 8172

```

Below are plots of a plot of `s(bl_age)`, `s(bl_age):sleep_z`, `s(bl_age):time`, and `s(sleep_z):time`. For `s(sleep_z):time`, roughly, if we cannot fit a straight line through the confidence bands, there is evidence that the effect of time depends on sleep duration. It is correct that the confidence interval is zero at one point along the axis; this happens because we do not include the main effect.

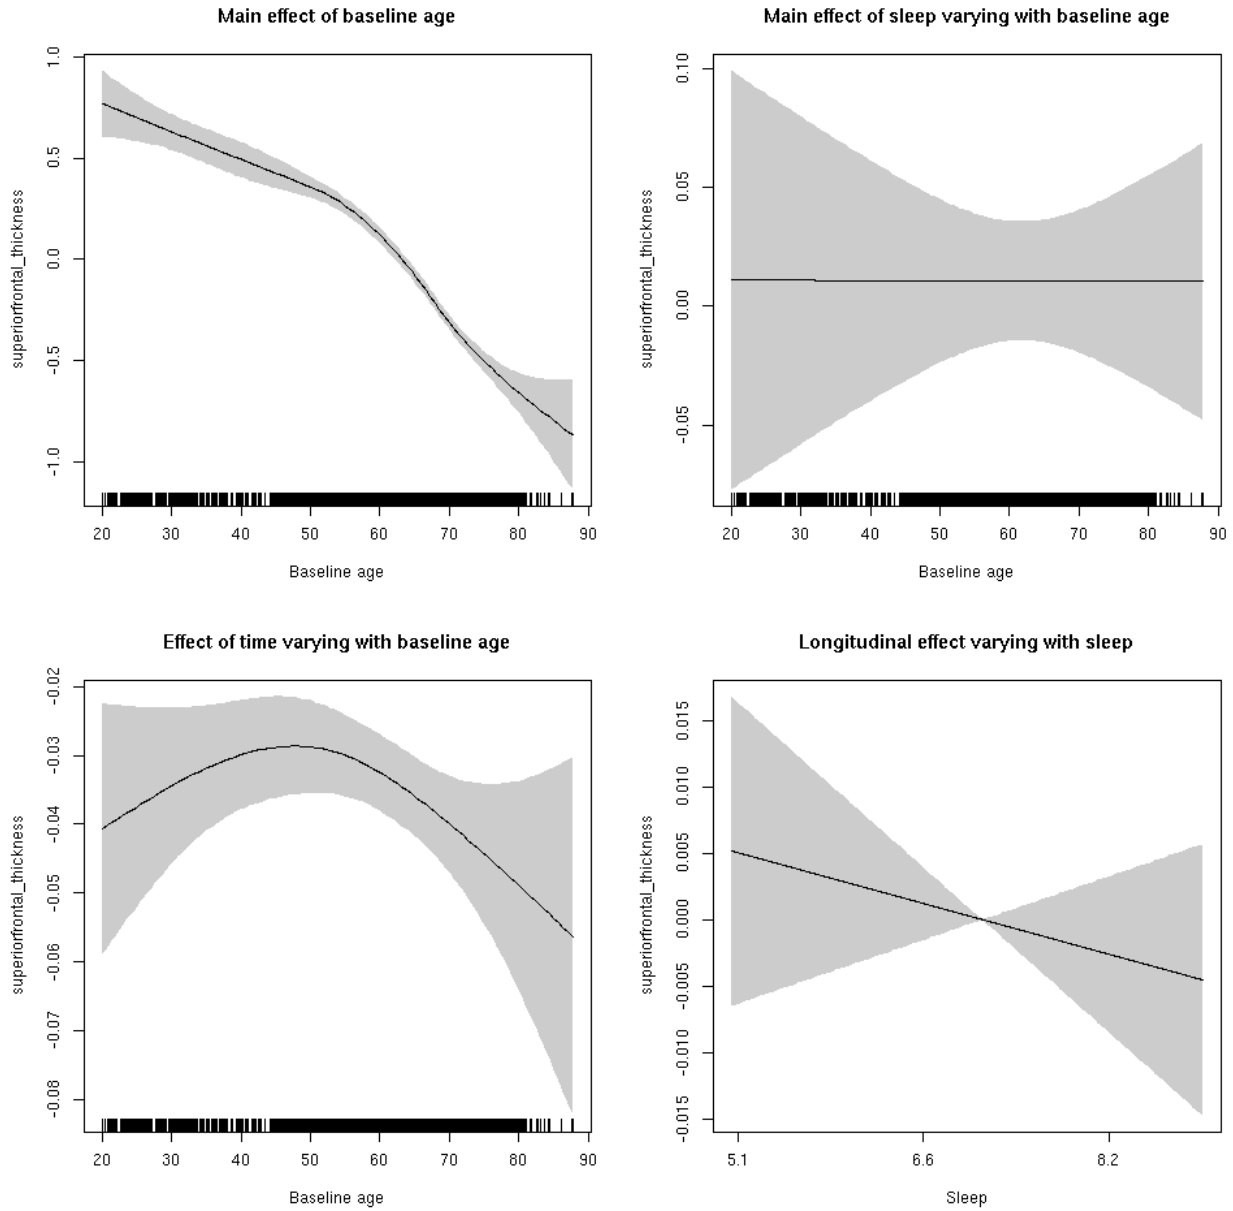

**Restricted to sleep  $\geq 5$  and  $\leq 9$  hours** Below is the row for `s(sleep_z):time` from the model output.

```
## s(sleep_z):time  1.000  1.000  0.784  0.376
```

Below are plots of a plot of `s(bl_age)`, `s(bl_age):sleep_z`, `s(bl_age):time`, and `s(sleep_z):time`. For `s(sleep_z):time`, roughly, if we cannot fit a straight line through the confidence bands, there is evidence that the effect of time depends on sleep duration. It is correct that the confidence interval is zero at one point along the axis; this happens because we do not include the main effect.

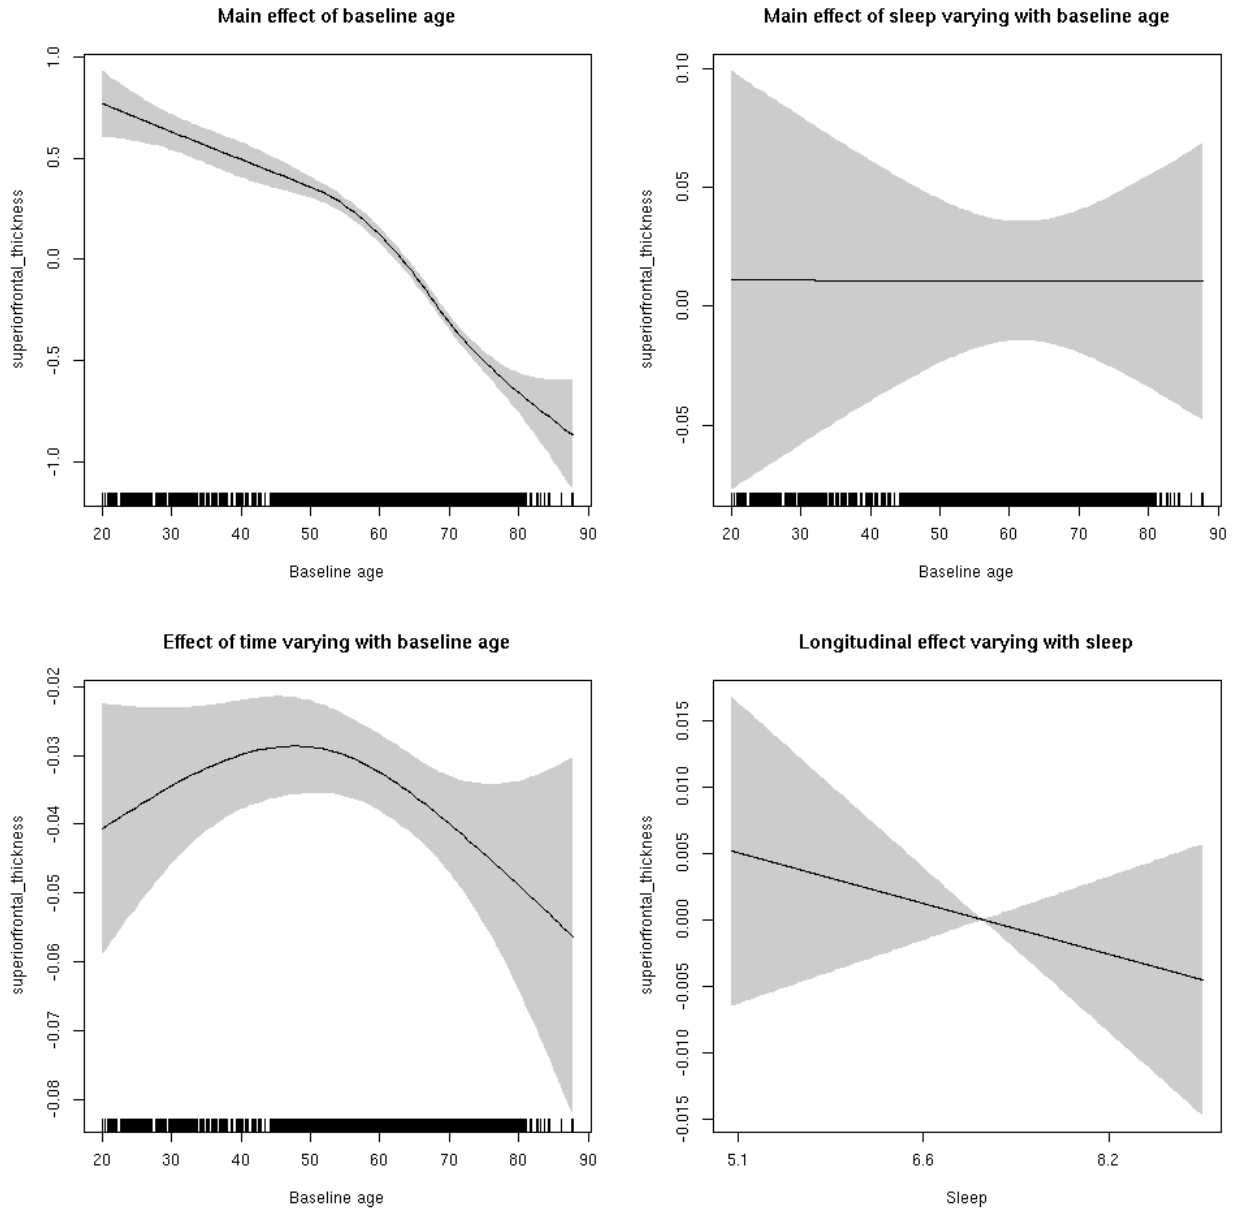

### superiorfrontal\_volume: Stratified by sex

**Female: Full data** Below is the row for `s(sleep_z):time` from the model output.

```
## s(sleep_z):time  2.599  2.599  1.382  0.284
```

Below are plots of a plot of `s(bl_age)`, `s(bl_age):sleep_z`, `s(bl_age):time`, and `s(sleep_z):time`. For `s(sleep_z):time`, roughly, if we cannot fit a straight line through the confidence bands, there is evidence that the effect of time depends on sleep duration. It is correct that the confidence interval is zero at one point along the axis; this happens because we do not include the main effect.

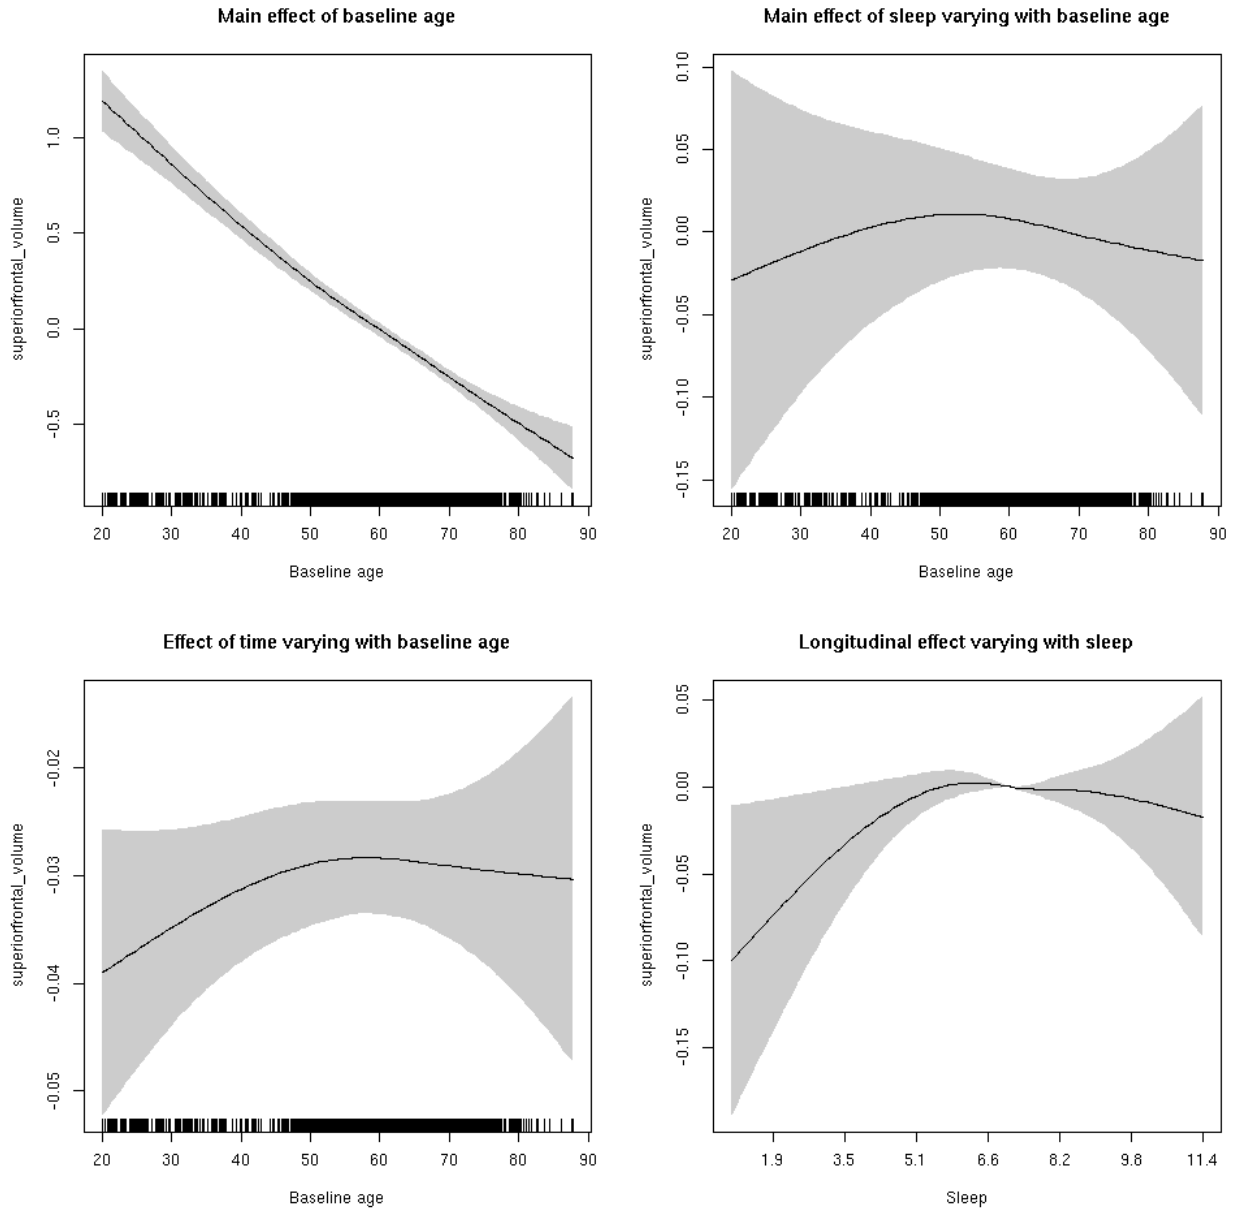

**Male: Full data** Below is the row for `s(sleep_z):time` from the model output.

```
## s(sleep_z):time  1.000  1.000  0.476  0.4905
```

Below are plots of a plot of `s(bl_age)`, `s(bl_age):sleep_z`, `s(bl_age):time`, and `s(sleep_z):time`. For `s(sleep_z):time`, roughly, if we cannot fit a straight line through the confidence bands, there is evidence that the effect of time depends on sleep duration. It is correct that the confidence interval is zero at one point along the axis; this happens because we do not include the main effect.

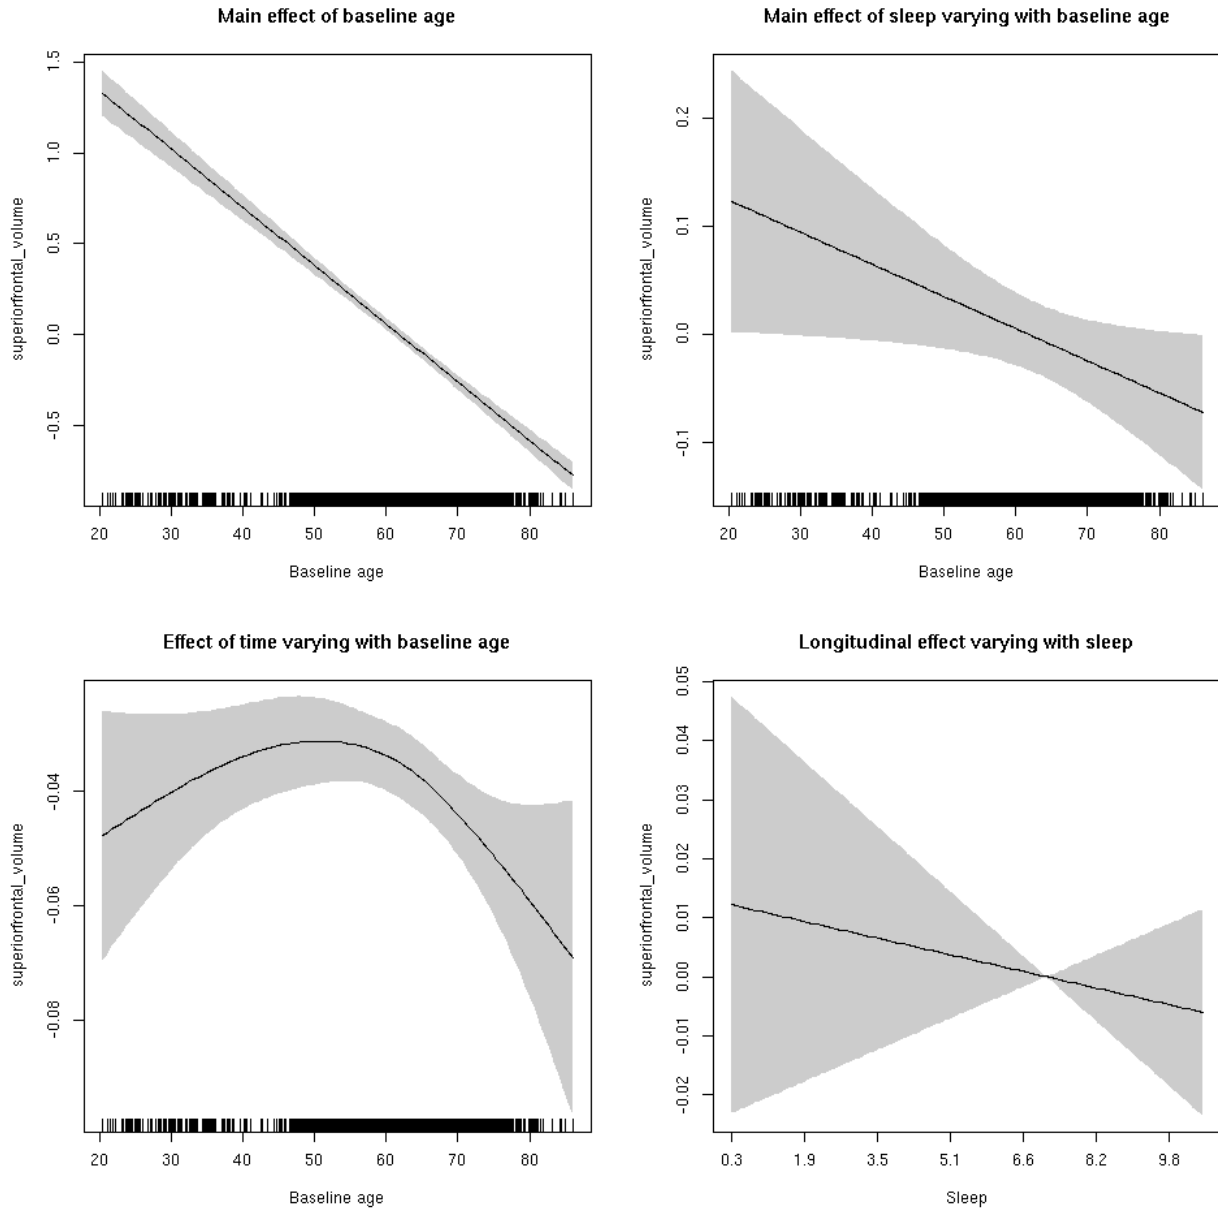

## superiorfrontal\_volume

**Full data** Below is the model output. The term `s(sleep_z):time` is probably what we care most about.

```
##
## Family: gaussian
## Link function: identity
##
## Formula:
## value ~ sex + site + icv + s(bl_age, k = 10, bs = "cr") + s(bl_age,
##   by = sleep_z, bs = "cr") + +s(bl_age, by = time, k = 5, bs = "cr") +
##   s(sleep_z, by = time, k = 5, bs = "cr", pc = 0)
## <environment: 0x5630035b4098>
```

```

##
## Parametric coefficients:
##           Estimate Std. Error t value Pr(>|t|)
## (Intercept)  0.140875  0.048253  2.920  0.00352 **
## sexmale      0.158561  0.024767  6.402  1.62e-10 ***
## siteousAvanto -0.970298  0.059063 -16.428 < 2e-16 ***
## siteousPrisma -0.676788  0.161652  -4.187  2.86e-05 ***
## siteousSkyra  -1.256849  0.057178 -21.981 < 2e-16 ***
## siteUB       -0.555481  0.110616  -5.022  5.23e-07 ***
## siteUCAM     -0.623602  0.059877 -10.415 < 2e-16 ***
## siteUKB      -0.008757  0.045833  -0.191  0.84849
## siteUmU      -0.279725  0.068735  -4.070  4.75e-05 ***
## icv          0.637480  0.012225  52.144 < 2e-16 ***
## ---
## Signif. codes:  0 '***' 0.001 '**' 0.01 '*' 0.05 '.' 0.1 ' ' 1
##
## Approximate significance of smooth terms:
##           edf Ref.df      F p-value
## s(bl_age)      3.509  3.509 268.553 <2e-16 ***
## s(bl_age):sleep_z 2.476  2.476  1.099  0.220
## s(bl_age):time  3.291  3.291  92.473 <2e-16 ***
## s(sleep_z):time  2.585  2.585  2.093  0.194
## ---
## Signif. codes:  0 '***' 0.001 '**' 0.01 '*' 0.05 '.' 0.1 ' ' 1
##
## R-sq.(adj) =  0.624
## lmer.REML = 8597.4  Scale est. = 0.038744  n = 8176

```

Below are plots of a plot of `s(bl_age)`, `s(bl_age):sleep_z`, `s(bl_age):time`, and `s(sleep_z):time`. For `s(sleep_z):time`, roughly, if we cannot fit a straight line through the confidence bands, there is evidence that the effect of time depends on sleep duration. It is correct that the confidence interval is zero at one point along the axis; this happens because we do not include the main effect.

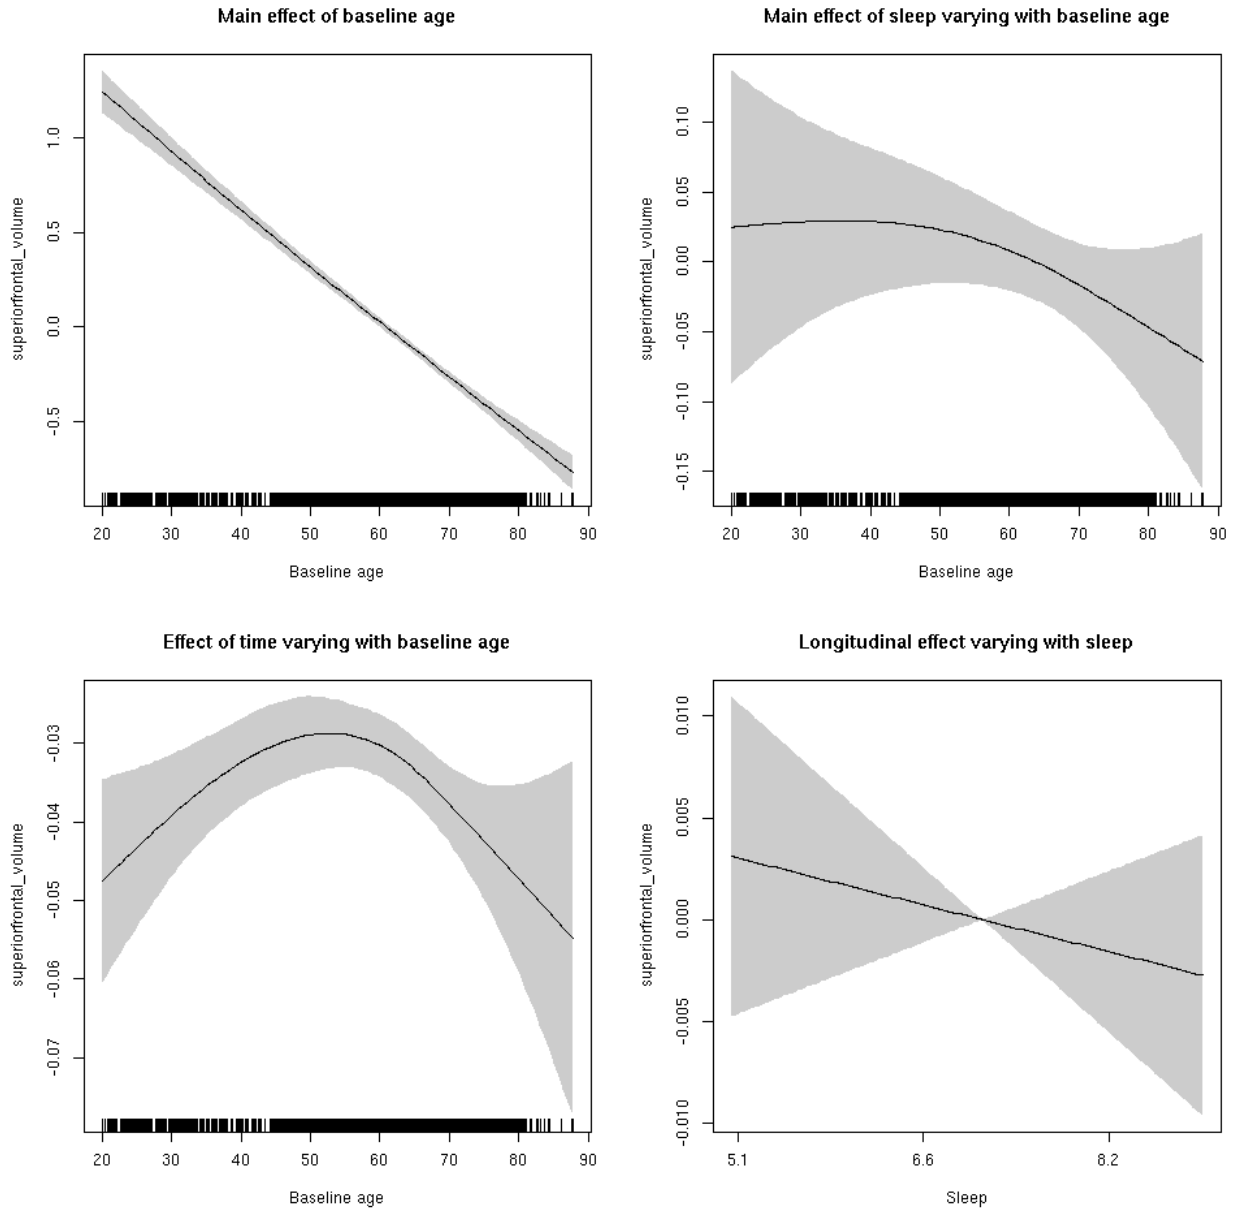

**Restricted to sleep  $\geq 5$  and  $\leq 9$  hours** Below is the row for `s(sleep_z):time` from the model output.

```
## s(sleep_z):time 1.000 1.000 0.628 0.428
```

Below are plots of a plot of `s(bl_age)`, `s(bl_age):sleep_z`, `s(bl_age):time`, and `s(sleep_z):time`. For `s(sleep_z):time`, roughly, if we cannot fit a straight line through the confidence bands, there is evidence that the effect of time depends on sleep duration. It is correct that the confidence interval is zero at one point along the axis; this happens because we do not include the main effect.

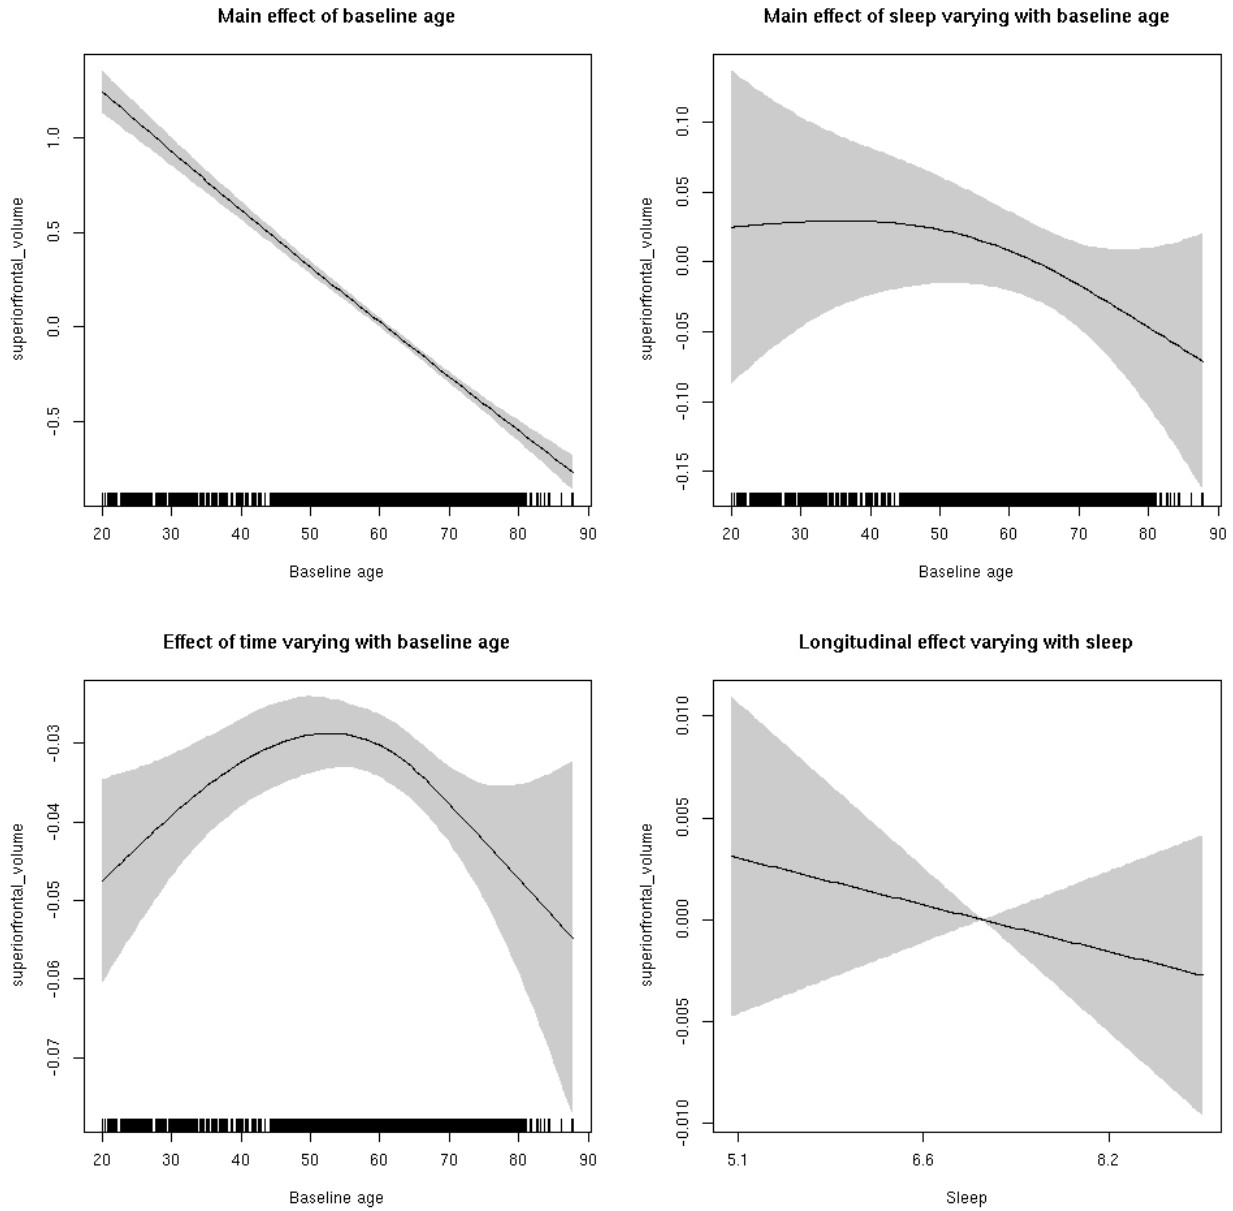

## superiorparietal\_area: Stratified by sex

**Female: Full data** Below is the row for `s(sleep_z):time` from the model output.

```
## s(sleep_z):time    1    1  0.494  0.482
```

Below are plots of a plot of `s(bl_age)`, `s(bl_age):sleep_z`, `s(bl_age):time`, and `s(sleep_z):time`. For `s(sleep_z):time`, roughly, if we cannot fit a straight line through the confidence bands, there is evidence that the effect of time depends on sleep duration. It is correct that the confidence interval is zero at one point along the axis; this happens because we do not include the main effect.



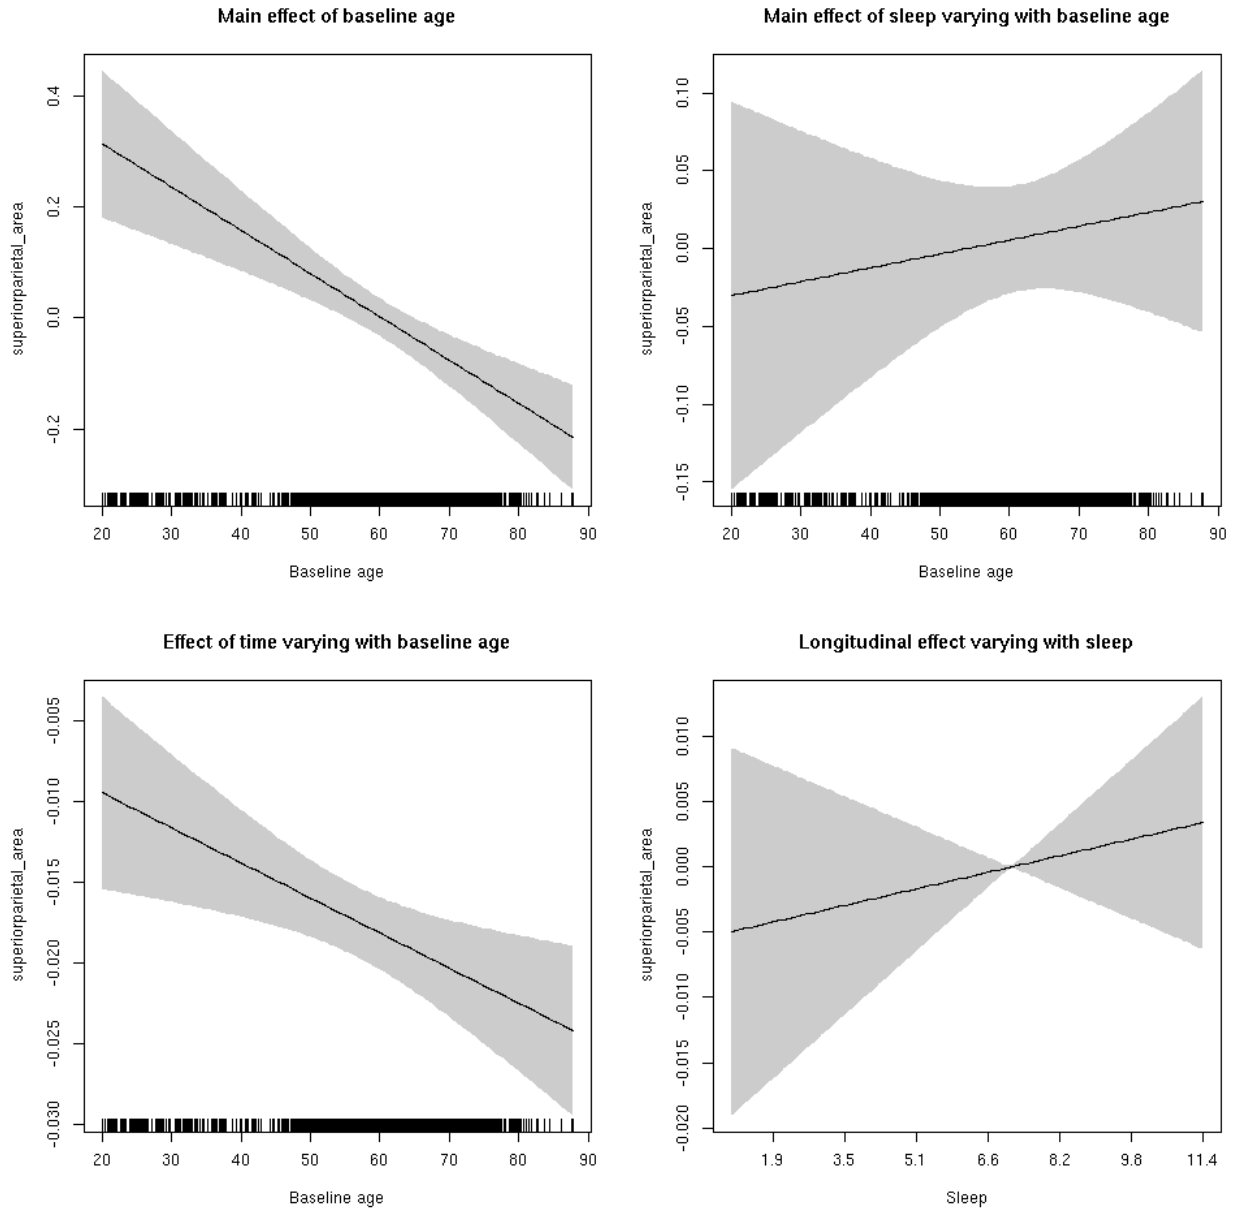

**Male: Full data** Below is the row for `s(sleep_z):time` from the model output.

```
## s(sleep_z):time      1      1  0.171  0.679
```

Below are plots of a plot of `s(bl_age)`, `s(bl_age):sleep_z`, `s(bl_age):time`, and `s(sleep_z):time`. For `s(sleep_z):time`, roughly, if we cannot fit a straight line through the confidence bands, there is evidence that the effect of time depends on sleep duration. It is correct that the confidence interval is zero at one point along the axis; this happens because we do not include the main effect.

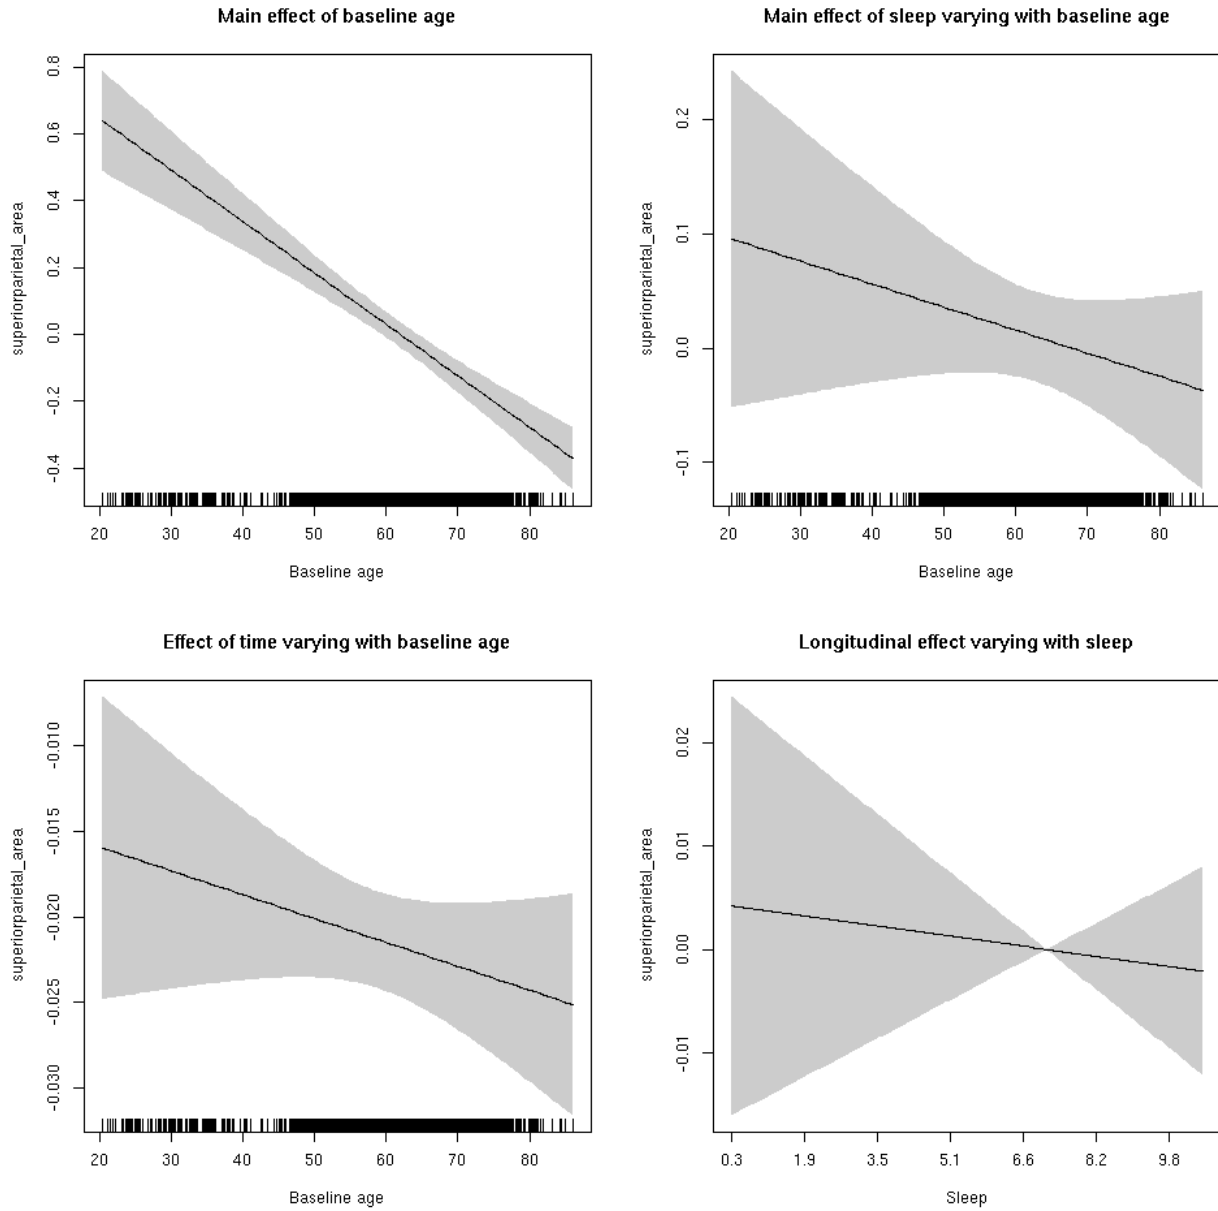

## superiorparietal\_area

**Full data** Below is the model output. The term `s(sleep_z):time` is probably what we care most about.

```
##
## Family: gaussian
## Link function: identity
##
## Formula:
## value ~ sex + site + icv + s(bl_age, k = 10, bs = "cr") + s(bl_age,
##   by = sleep_z, bs = "cr") + +s(bl_age, by = time, k = 5, bs = "cr") +
##   s(sleep_z, by = time, k = 5, bs = "cr", pc = 0)
## <environment: 0x5630035b24c0>
```

```

##
## Parametric coefficients:
##           Estimate Std. Error t value Pr(>|t|)
## (Intercept)  0.60498   0.05858  10.328 < 2e-16 ***
## sexmale      0.04323   0.03047   1.419  0.1560
## siteousAvanto -0.76435   0.07209 -10.603 < 2e-16 ***
## siteousPrisma -0.71614   0.11334  -6.319 2.78e-10 ***
## siteousSkyra  -0.28177   0.06993  -4.029 5.64e-05 ***
## siteUB       -0.69727   0.13779  -5.060 4.28e-07 ***
## siteUCAM     -0.77930   0.07331 -10.630 < 2e-16 ***
## siteUKB      -0.59222   0.05474 -10.819 < 2e-16 ***
## siteUmU      0.14541   0.08476   1.716  0.0863 .
## icv          0.57437   0.01464  39.233 < 2e-16 ***
## ---
## Signif. codes:  0 '***' 0.001 '**' 0.01 '*' 0.05 '.' 0.1 ' ' 1
##
## Approximate significance of smooth terms:
##           edf Ref.df      F p-value
## s(bl_age)      1     1  97.816 <2e-16 ***
## s(bl_age):sleep_z  2     2   0.211  0.809
## s(bl_age):time    2     2 241.460 <2e-16 ***
## s(sleep_z):time    1     1   0.005  0.941
## ---
## Signif. codes:  0 '***' 0.001 '**' 0.01 '*' 0.05 '.' 0.1 ' ' 1
##
## R-sq.(adj) =  0.392
## lmer.REML = 5341.5  Scale est. = 0.012193  n = 8141

```

Below are plots of a plot of `s(bl_age)`, `s(bl_age):sleep_z`, `s(bl_age):time`, and `s(sleep_z):time`. For `s(sleep_z):time`, roughly, if we cannot fit a straight line through the confidence bands, there is evidence that the effect of time depends on sleep duration. It is correct the that confidence interval is zero at one point along the axis; this happens because we do not include the main effect.

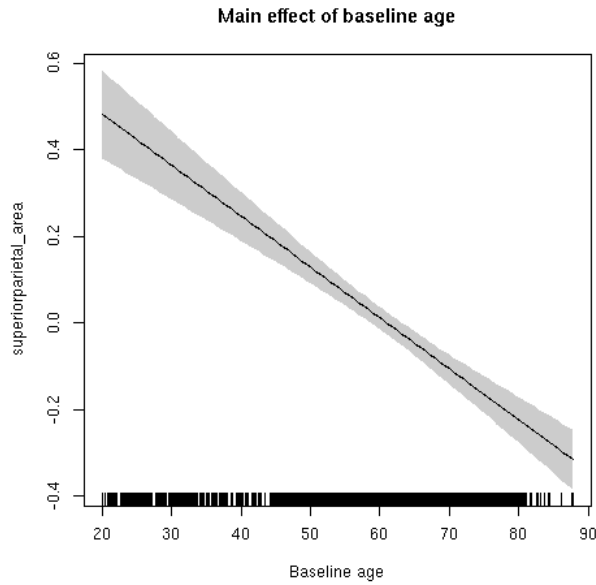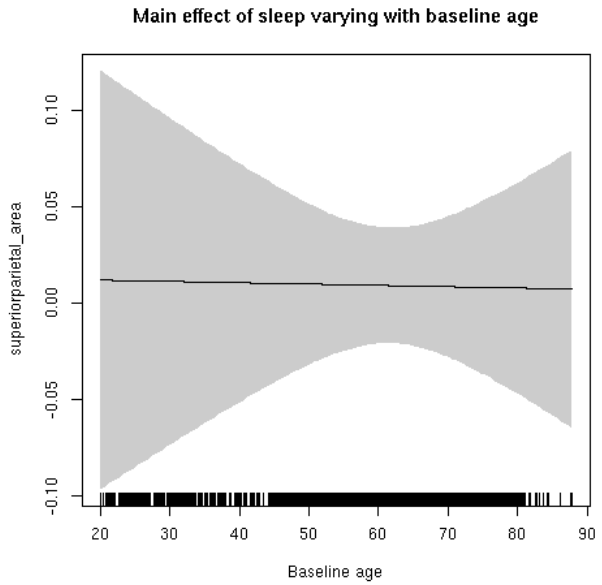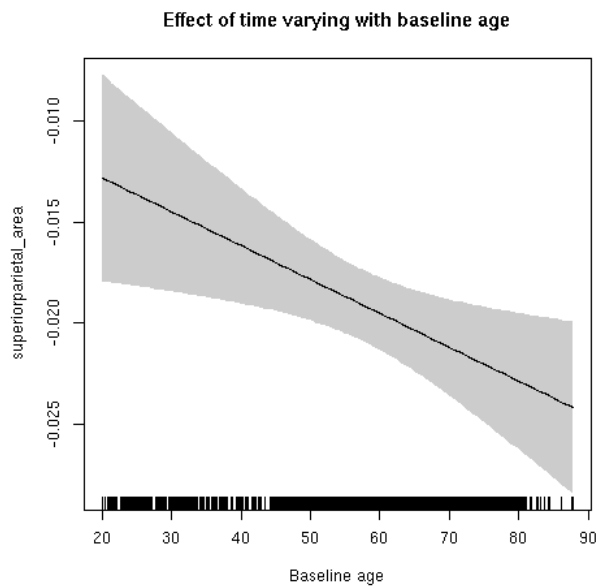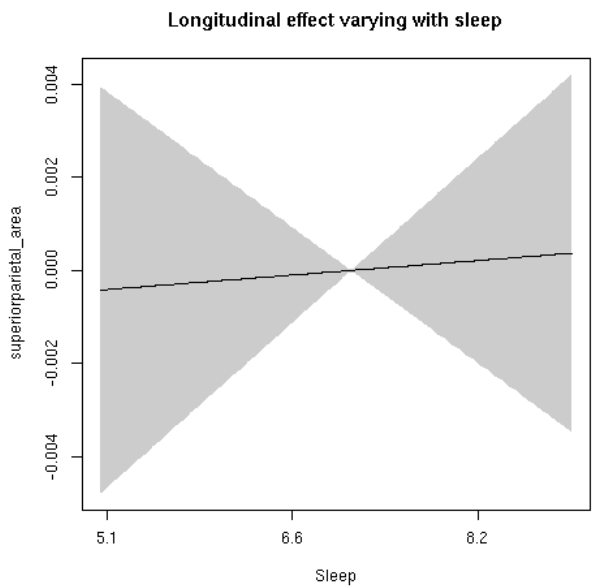

**Restricted to sleep  $\geq 5$  and  $\leq 9$  hours** Below is the row for `s(sleep_z):time` from the model output.

```
## s(sleep_z):time      1      1  0.038  0.846
```

Below are plots of a plot of `s(bl_age)`, `s(bl_age):sleep_z`, `s(bl_age):time`, and `s(sleep_z):time`. For `s(sleep_z):time`, roughly, if we cannot fit a straight line through the confidence bands, there is evidence that the effect of time depends on sleep duration. It is correct that the confidence interval is zero at one point along the axis; this happens because we do not include the main effect.

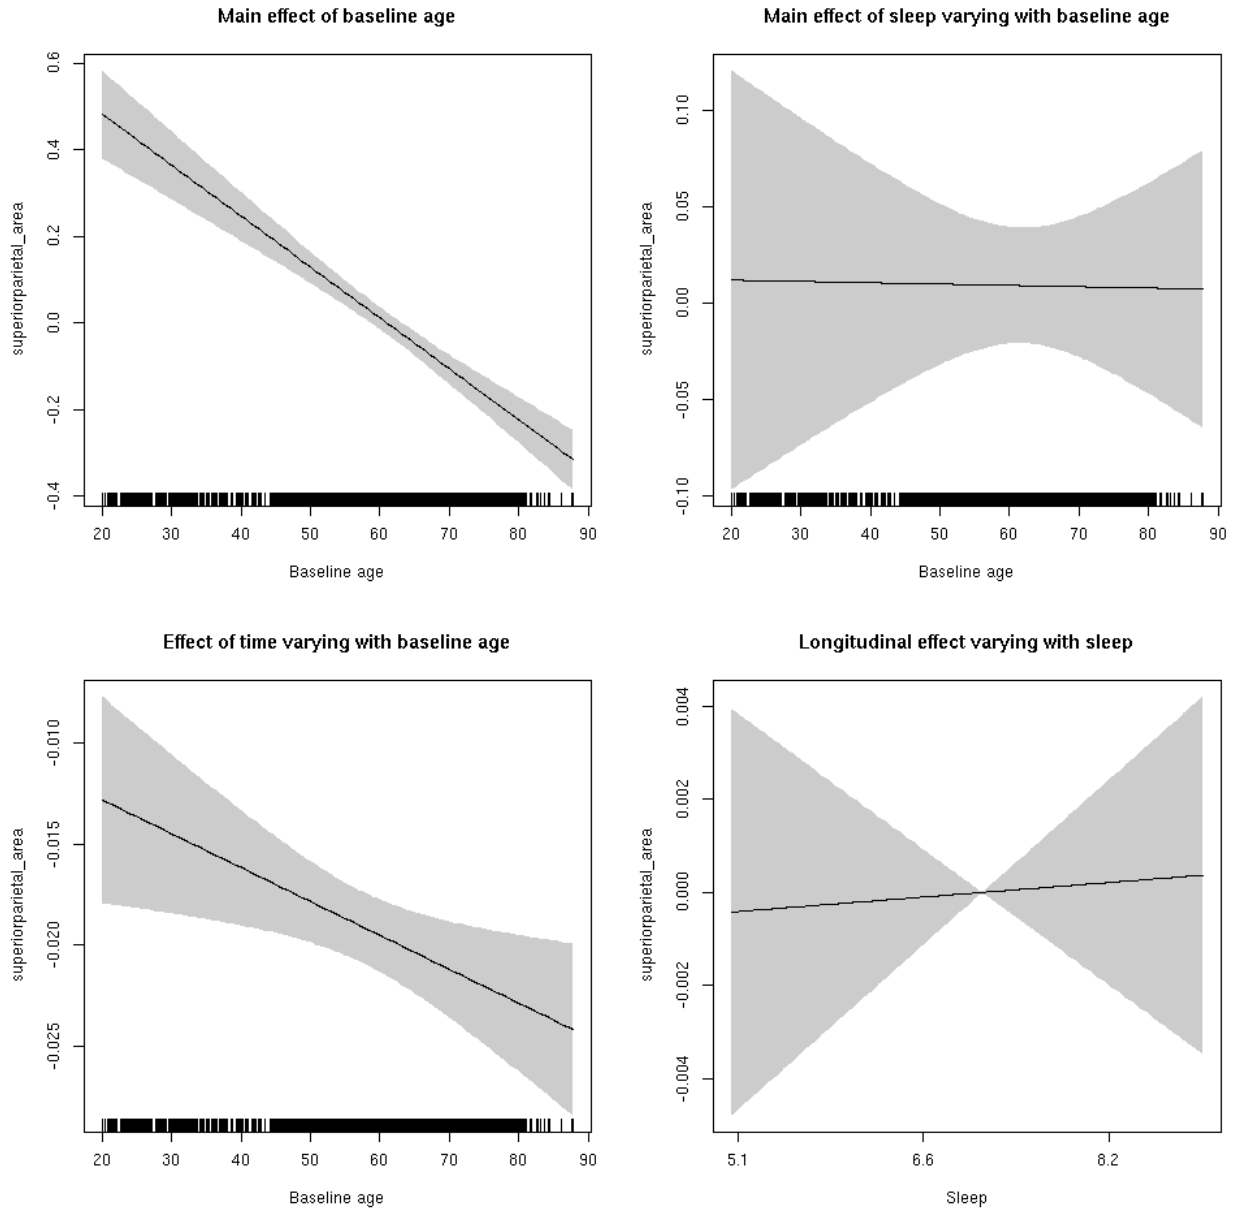

### superiorparietal\_thickness: Stratified by sex

**Female: Full data** Below is the row for `s(sleep_z):time` from the model output.

```
## s(sleep_z):time  1.000  1.000  2.136  0.144
```

Below are plots of a plot of `s(bl_age)`, `s(bl_age):sleep_z`, `s(bl_age):time`, and `s(sleep_z):time`. For `s(sleep_z):time`, roughly, if we cannot fit a straight line through the confidence bands, there is evidence that the effect of time depends on sleep duration. It is correct that the confidence interval is zero at one point along the axis; this happens because we do not include the main effect.

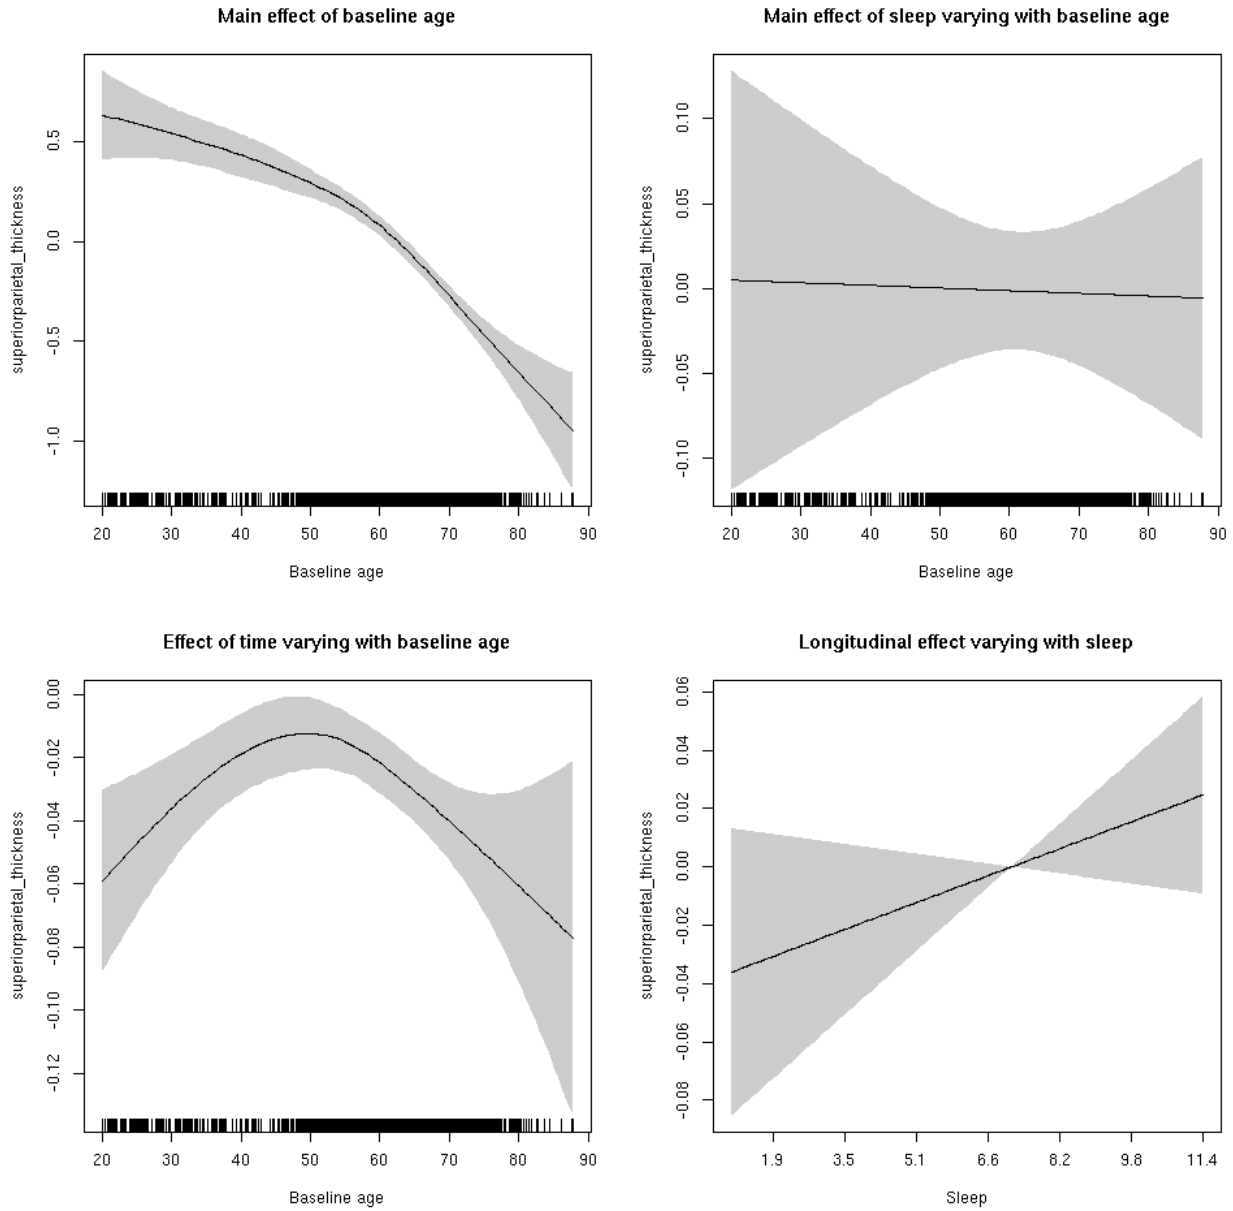

**Male: Full data** Below is the row for `s(sleep_z):time` from the model output.

```
## s(sleep_z):time  3.314  3.314  1.708  0.0849 .
```

Below are plots of a plot of `s(bl_age)`, `s(bl_age):sleep_z`, `s(bl_age):time`, and `s(sleep_z):time`. For `s(sleep_z):time`, roughly, if we cannot fit a straight line through the confidence bands, there is evidence that the effect of time depends on sleep duration. It is correct that the confidence interval is zero at one point along the axis; this happens because we do not include the main effect.

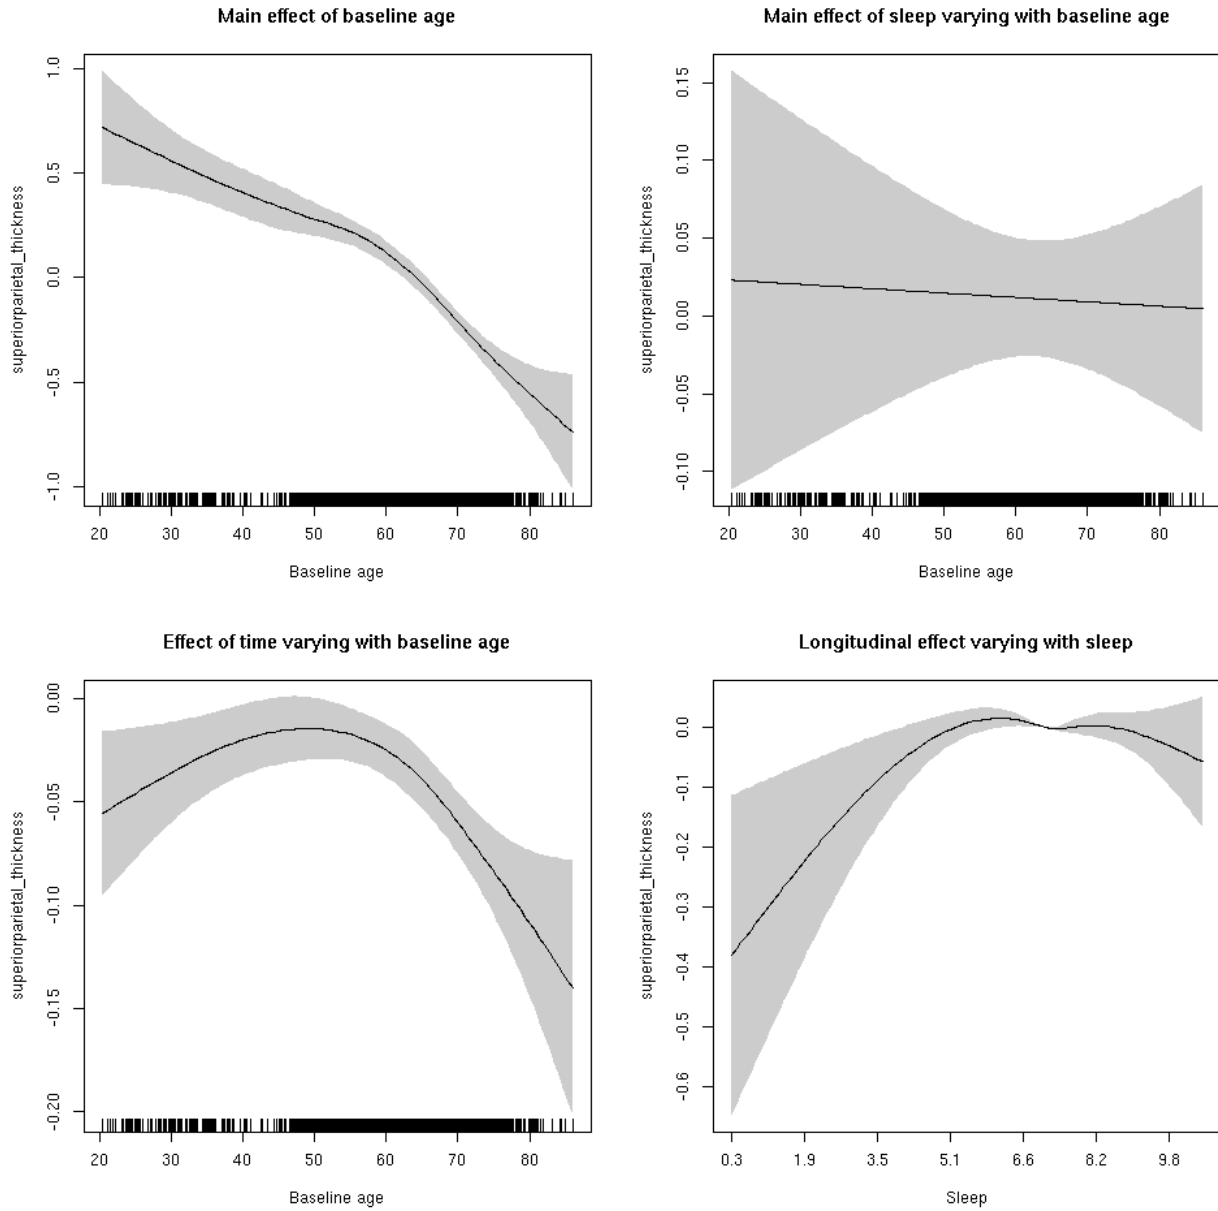

## superiorparietal\_thickness

**Full data** Below is the model output. The term `s(sleep_z):time` is probably what we care most about.

```
##
## Family: gaussian
## Link function: identity
##
## Formula:
## value ~ sex + site + s(bl_age, k = 10, bs = "cr") + s(bl_age,
##   by = sleep_z, bs = "cr") + +s(bl_age, by = time, k = 5, bs = "cr") +
##   s(sleep_z, by = time, k = 5, bs = "cr", pc = 0)
## <environment: 0x5630035cf1b8>
```

```

##
## Parametric coefficients:
##           Estimate Std. Error t value Pr(>|t|)
## (Intercept) -1.40582    0.04785 -29.380 < 2e-16 ***
## sexmale     -0.07850    0.02398  -3.274 0.001065 **
## siteousAvanto  0.01922    0.06357   0.302 0.762446
## siteousPrisma  0.83445    0.27091   3.080 0.002076 **
## siteousSkyra -0.23995    0.06356  -3.775 0.000161 ***
## siteUB       0.66094    0.12693   5.207 1.96e-07 ***
## siteUCAM     0.61170    0.06588   9.286 < 2e-16 ***
## siteUKB      1.70408    0.04851  35.128 < 2e-16 ***
## siteUmU      0.04644    0.07885   0.589 0.555929
## ---
## Signif. codes:  0 '***' 0.001 '**' 0.01 '*' 0.05 '.' 0.1 ' ' 1
##
## Approximate significance of smooth terms:
##           edf Ref.df      F p-value
## s(bl_age)      3.765  3.765 126.289 <2e-16 ***
## s(bl_age):sleep_z 2.000  2.000   0.095  0.9092
## s(bl_age):time  3.751  3.751  33.148 <2e-16 ***
## s(sleep_z):time  3.533  3.533   2.969  0.0126 *
## ---
## Signif. codes:  0 '***' 0.001 '**' 0.01 '*' 0.05 '.' 0.1 ' ' 1
##
## R-sq.(adj) =  0.504
## lmer.REML = 14845  Scale est. = 0.12593  n = 8172

```

Below are plots of a plot of `s(bl_age)`, `s(bl_age):sleep_z`, `s(bl_age):time`, and `s(sleep_z):time`. For `s(sleep_z):time`, roughly, if we cannot fit a straight line through the confidence bands, there is evidence that the effect of time depends on sleep duration. It is correct that the confidence interval is zero at one point along the axis; this happens because we do not include the main effect.



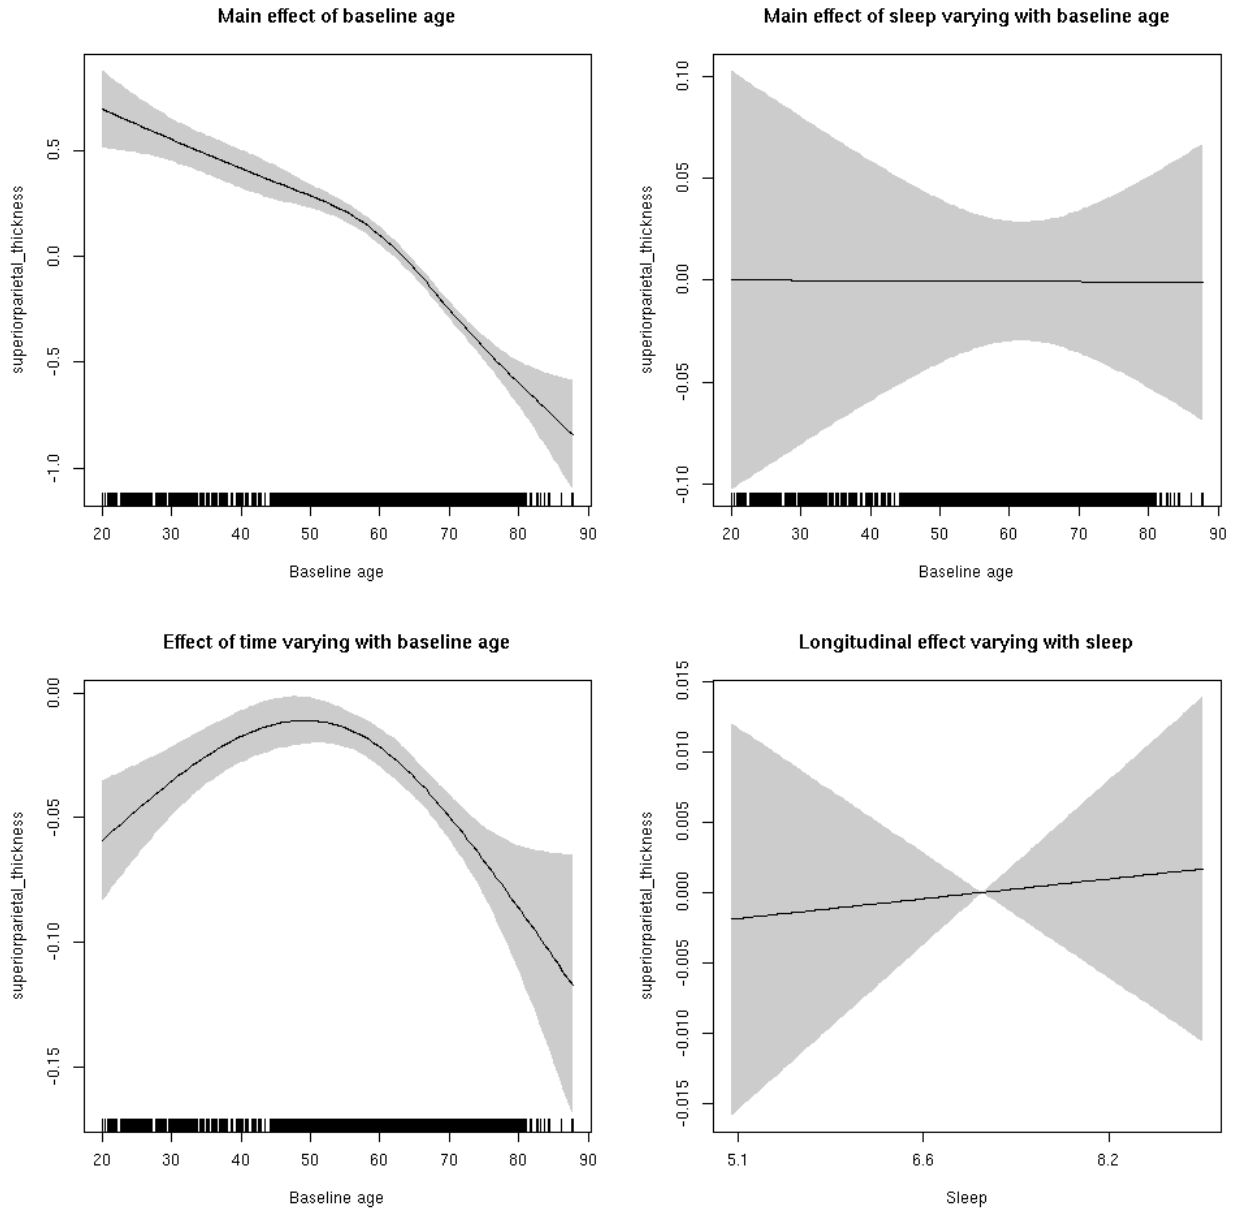

**Restricted to sleep  $\geq 5$  and  $\leq 9$  hours** Below is the row for `s(sleep_z):time` from the model output.

```
## s(sleep_z):time  1.000  1.000  0.075  0.785
```

Below are plots of a plot of `s(bl_age)`, `s(bl_age):sleep_z`, `s(bl_age):time`, and `s(sleep_z):time`. For `s(sleep_z):time`, roughly, if we cannot fit a straight line through the confidence bands, there is evidence that the effect of time depends on sleep duration. It is correct that the confidence interval is zero at one point along the axis; this happens because we do not include the main effect.



## superiorparietal\_volume: Stratified by sex

**Female: Full data** Below is the row for `s(sleep_z):time` from the model output.

```
## s(sleep_z):time  1.000  1.000  0.867  0.352
```

Below are plots of a plot of `s(bl_age)`, `s(bl_age):sleep_z`, `s(bl_age):time`, and `s(sleep_z):time`. For `s(sleep_z):time`, roughly, if we cannot fit a straight line through the confidence bands, there is evidence that the effect of time depends on sleep duration. It is correct that the confidence interval is zero at one point along the axis; this happens because we do not include the main effect.

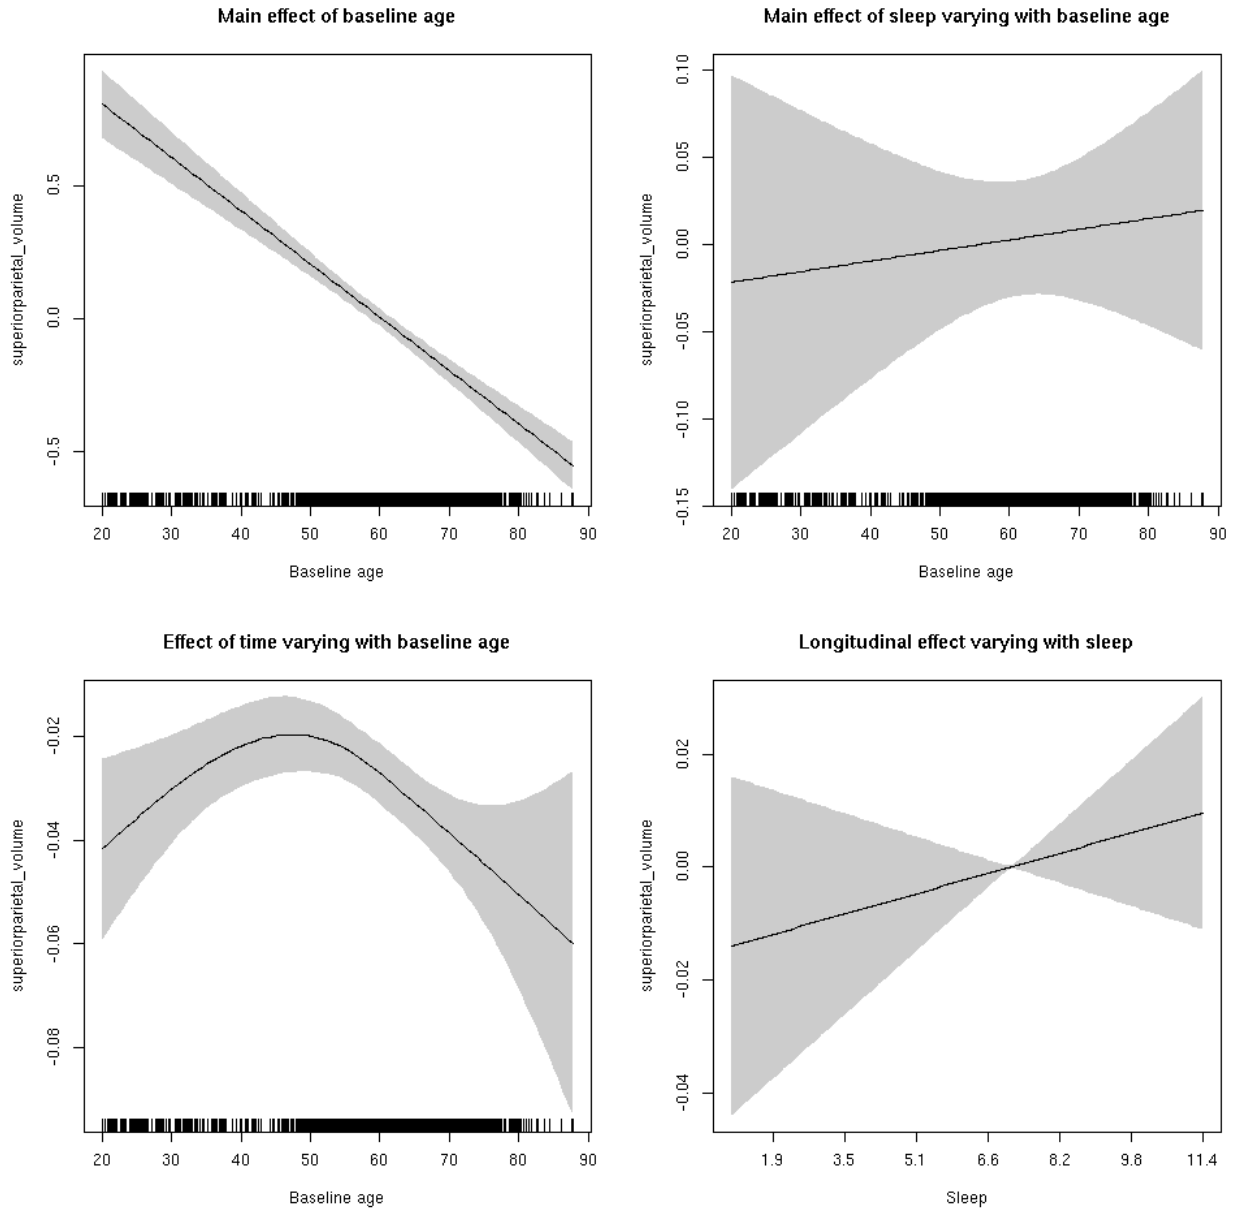

**Male: Full data** Below is the row for `s(sleep_z):time` from the model output.

```
## s(sleep_z):time  1.000  1.000  0.236  0.627
```

Below are plots of a plot of `s(bl_age)`, `s(bl_age):sleep_z`, `s(bl_age):time`, and `s(sleep_z):time`. For `s(sleep_z):time`, roughly, if we cannot fit a straight line through the confidence bands, there is evidence that the effect of time depends on sleep duration. It is correct that the confidence interval is zero at one point along the axis; this happens because we do not include the main effect.

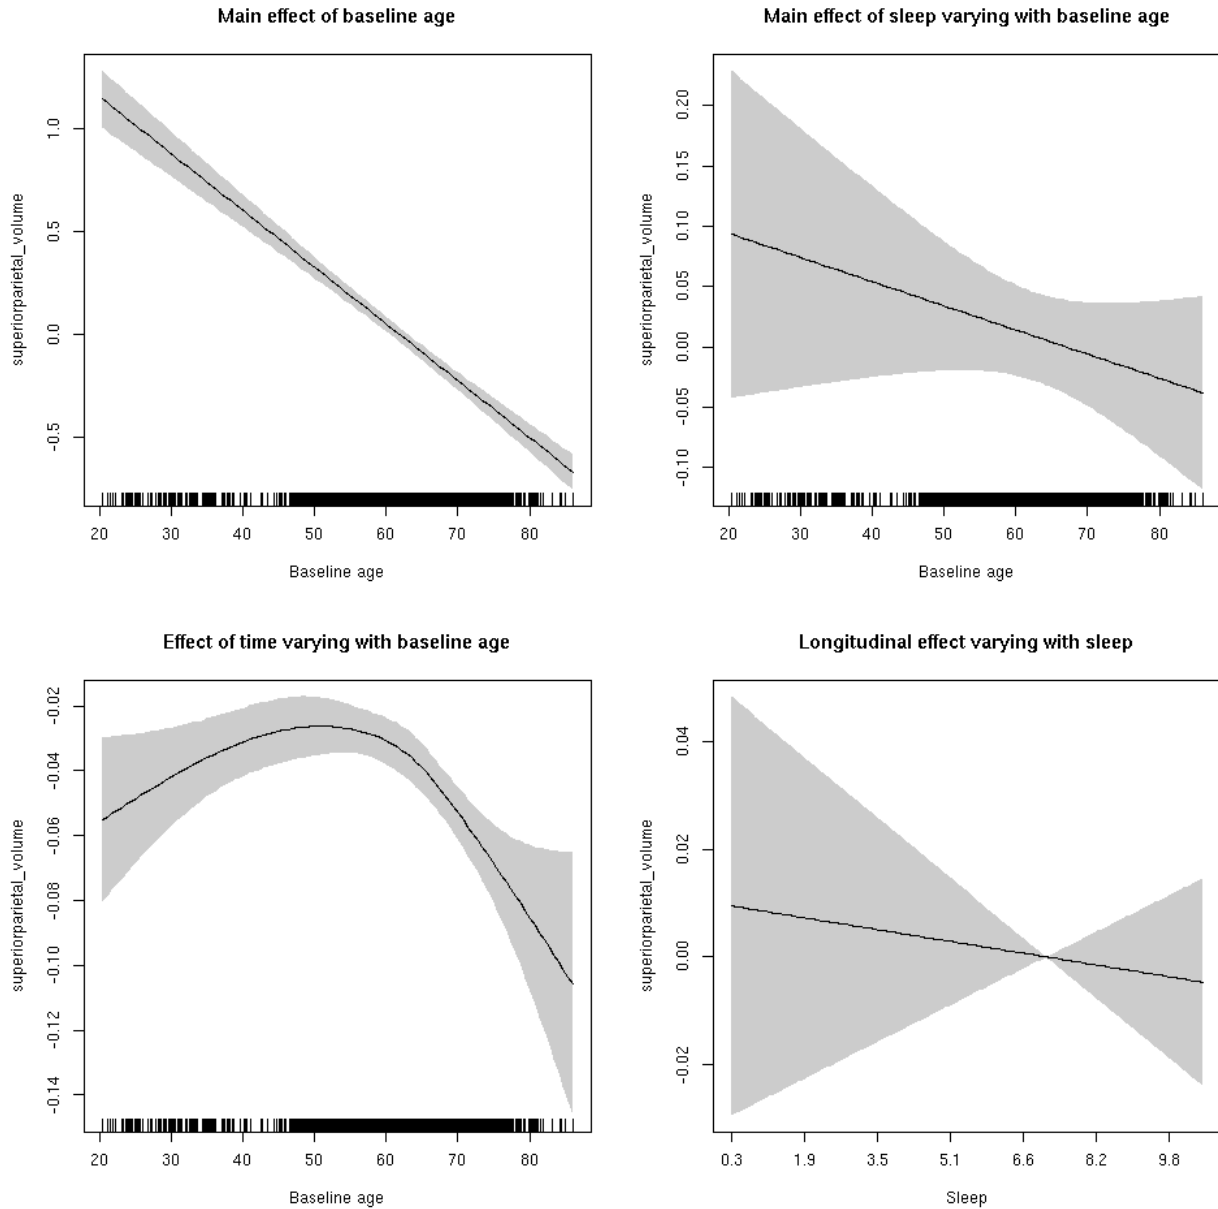

## superiorparietal\_volume

**Full data** Below is the model output. The term `s(sleep_z):time` is probably what we care most about.

```
##
## Family: gaussian
## Link function: identity
##
## Formula:
## value ~ sex + site + icv + s(bl_age, k = 10, bs = "cr") + s(bl_age,
##   by = sleep_z, bs = "cr") + +s(bl_age, by = time, k = 5, bs = "cr") +
##   s(sleep_z, by = time, k = 5, bs = "cr", pc = 0)
## <environment: 0x5630035b43e0>
```

```

##
## Parametric coefficients:
##           Estimate Std. Error t value Pr(>|t|)
## (Intercept)  0.02135   0.05595   0.382  0.70275
## sexmale      -0.07591   0.02886  -2.630  0.00855 **
## siteousAvanto -0.83228   0.06872 -12.112 < 2e-16 ***
## siteousPrisma -0.25604   0.18295  -1.400  0.16169
## siteousSkyra  -0.51168   0.06652  -7.692 1.62e-14 ***
## siteUB        -0.31690   0.12887  -2.459  0.01395 *
## siteUCAM      -0.46708   0.06921  -6.749 1.59e-11 ***
## siteUKB       0.19260   0.05271   3.654  0.00026 ***
## siteUmU       0.03787   0.07992   0.474  0.63563
## icv           0.58180   0.01424  40.851 < 2e-16 ***
## ---
## Signif. codes:  0 '***' 0.001 '**' 0.01 '*' 0.05 '.' 0.1 ' ' 1
##
## Approximate significance of smooth terms:
##           edf Ref.df      F p-value
## s(bl_age)      1.845  1.845 204.779 <2e-16 ***
## s(bl_age):sleep_z 2.000  2.000   0.369   0.691
## s(bl_age):time  3.703  3.703 114.901 <2e-16 ***
## s(sleep_z):time  1.000  1.000   0.043   0.836
## ---
## Signif. codes:  0 '***' 0.001 '**' 0.01 '*' 0.05 '.' 0.1 ' ' 1
##
## R-sq.(adj) =  0.471
## lmer.REML = 10789  Scale est. = 0.049017  n = 8166

```

Below are plots of a plot of `s(bl_age)`, `s(bl_age):sleep_z`, `s(bl_age):time`, and `s(sleep_z):time`. For `s(sleep_z):time`, roughly, if we cannot fit a straight line through the confidence bands, there is evidence that the effect of time depends on sleep duration. It is correct that the confidence interval is zero at one point along the axis; this happens because we do not include the main effect.

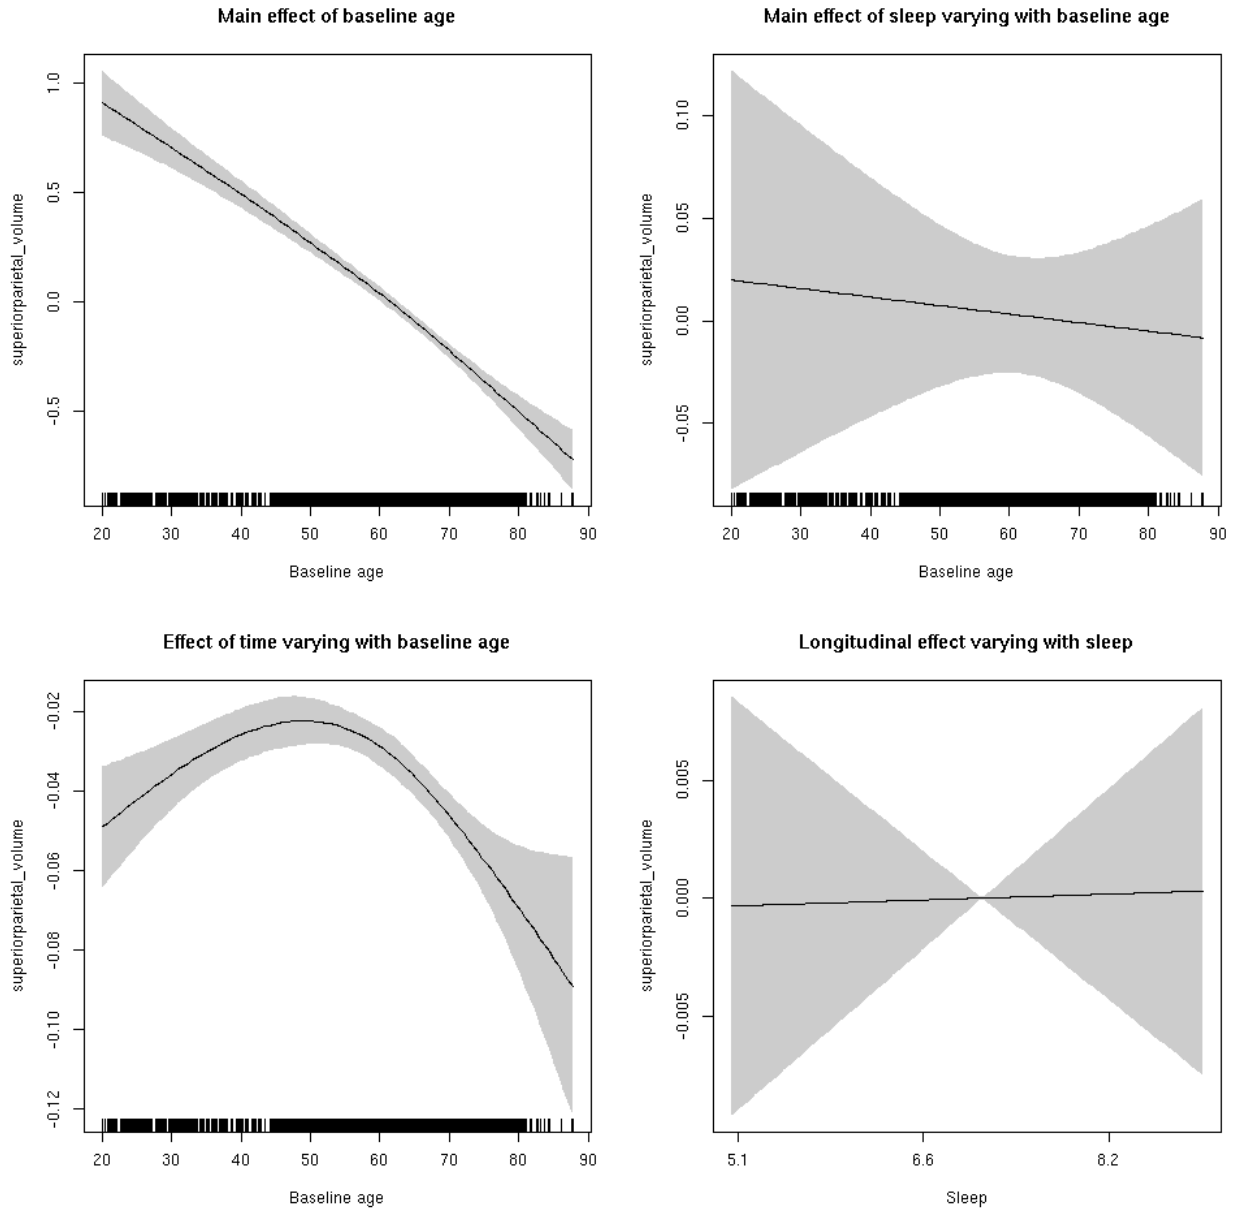

**Restricted to sleep  $\geq 5$  and  $\leq 9$  hours** Below is the row for `s(sleep_z):time` from the model output.

```
## s(sleep_z):time  1.000  1.000  0.006  0.939
```

Below are plots of a plot of `s(bl_age)`, `s(bl_age):sleep_z`, `s(bl_age):time`, and `s(sleep_z):time`. For `s(sleep_z):time`, roughly, if we cannot fit a straight line through the confidence bands, there is evidence that the effect of time depends on sleep duration. It is correct that the confidence interval is zero at one point along the axis; this happens because we do not include the main effect.

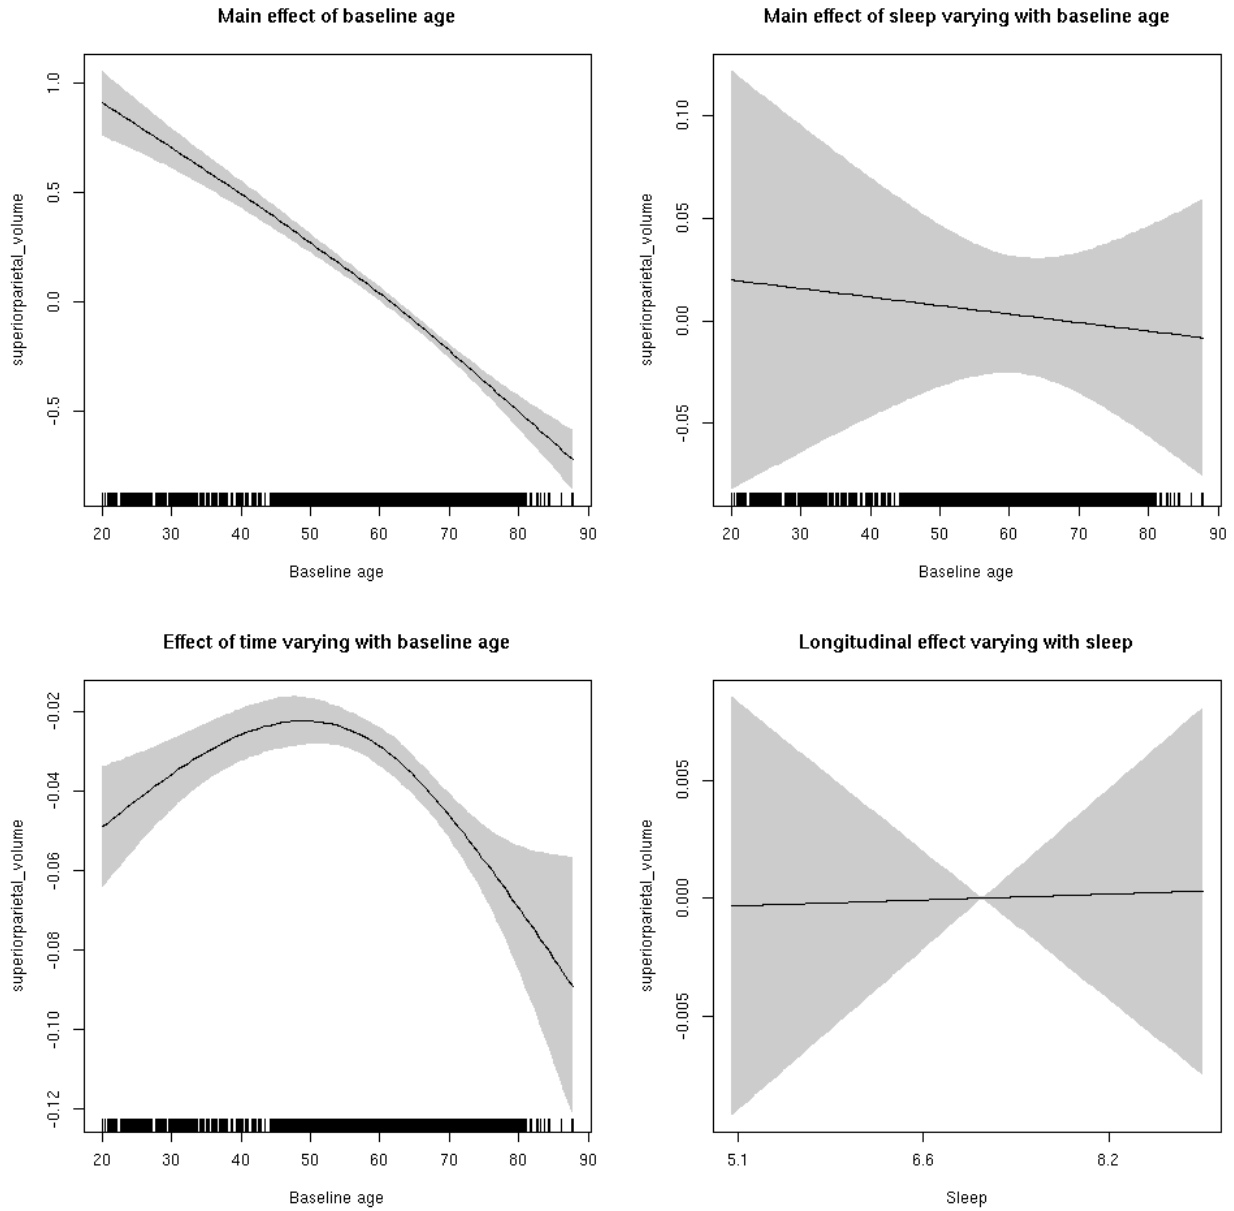

**superiortemporal\_area: Stratified by sex**

**Female: Full data** Below is the row for `s(sleep_z):time` from the model output.

```
## s(sleep_z):time  1.000  1.000  0.238  0.626
```

Below are plots of a plot of `s(bl_age)`, `s(bl_age):sleep_z`, `s(bl_age):time`, and `s(sleep_z):time`. For `s(sleep_z):time`, roughly, if we cannot fit a straight line through the confidence bands, there is evidence that the effect of time depends on sleep duration. It is correct that the confidence interval is zero at one point along the axis; this happens because we do not include the main effect.

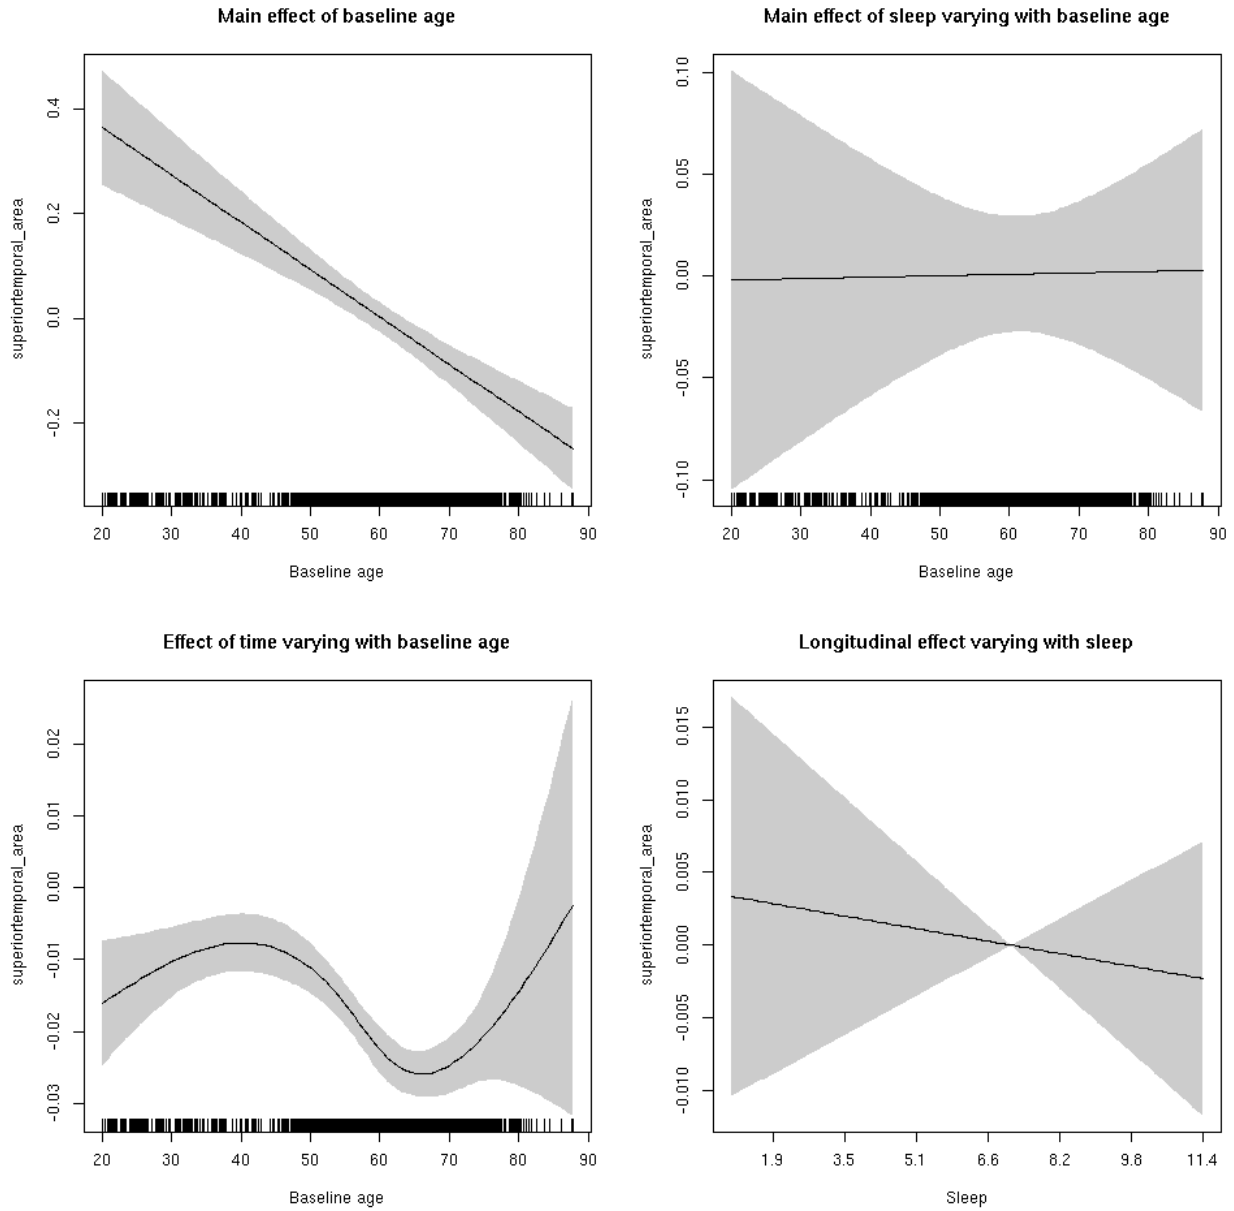

**Male: Full data** Below is the row for `s(sleep_z):time` from the model output.

```
## s(sleep_z):time  1.000  1.000  0.188  0.665
```

Below are plots of a plot of `s(bl_age)`, `s(bl_age):sleep_z`, `s(bl_age):time`, and `s(sleep_z):time`. For `s(sleep_z):time`, roughly, if we cannot fit a straight line through the confidence bands, there is evidence that the effect of time depends on sleep duration. It is correct that the confidence interval is zero at one point along the axis; this happens because we do not include the main effect.



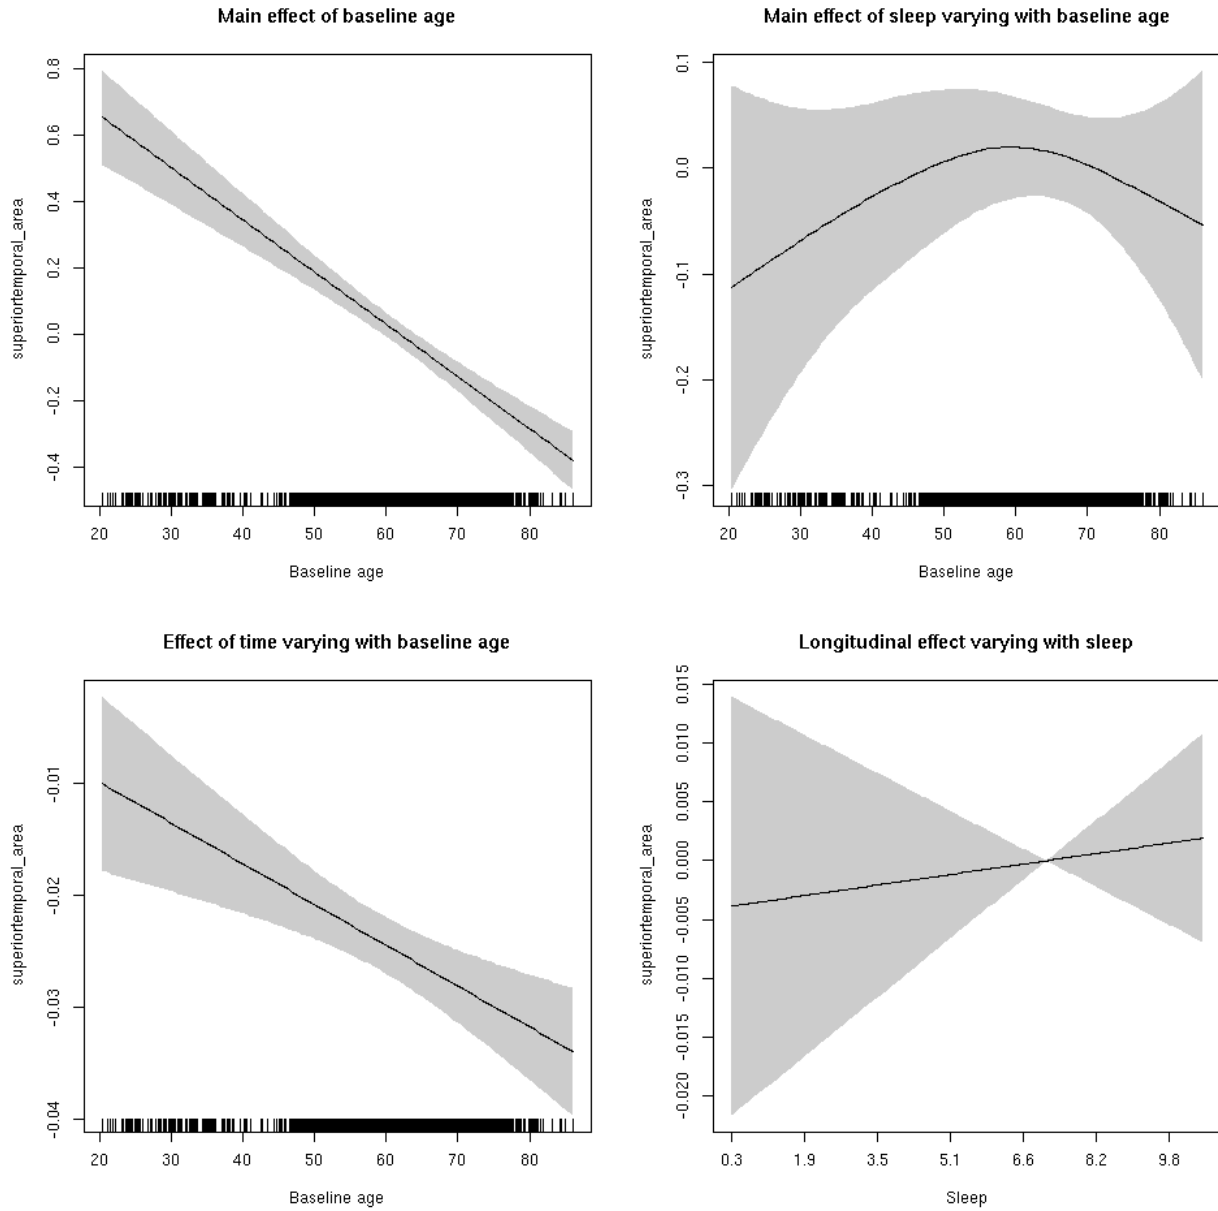

## superiortemporal\_area

**Full data** Below is the model output. The term `s(sleep_z):time` is probably what we care most about.

```
##
## Family: gaussian
## Link function: identity
##
## Formula:
## value ~ sex + site + icv + s(bl_age, k = 10, bs = "cr") + s(bl_age,
##   by = sleep_z, bs = "cr") + +s(bl_age, by = time, k = 5, bs = "cr") +
##   s(sleep_z, by = time, k = 5, bs = "cr", pc = 0)
## <environment: 0x5630035aed10>
```

```

##
## Parametric coefficients:
##           Estimate Std. Error t value Pr(>|t|)
## (Intercept)  0.68797    0.05213  13.197 < 2e-16 ***
## sexmale      0.25289    0.02708   9.339 < 2e-16 ***
## siteousAvanto -0.74913    0.06421 -11.667 < 2e-16 ***
## siteousPrisma -0.90811    0.10273  -8.840 < 2e-16 ***
## siteousSkyra  -0.31745    0.06225  -5.099 3.48e-07 ***
## siteUB       -0.82574    0.12266  -6.732 1.79e-11 ***
## siteUCAM     -0.69508    0.06533 -10.639 < 2e-16 ***
## siteUKB      -0.79773    0.04872 -16.373 < 2e-16 ***
## siteUmU      -0.15480    0.07546  -2.052  0.0402 *
## icv          0.61215    0.01302  46.999 < 2e-16 ***
## ---
## Signif. codes:  0 '***' 0.001 '**' 0.01 '*' 0.05 '.' 0.1 ' ' 1
##
## Approximate significance of smooth terms:
##           edf Ref.df      F p-value
## s(bl_age)      1.000  1.000 135.412 <2e-16 ***
## s(bl_age):sleep_z 2.000  2.000   0.045  0.956
## s(bl_age):time  4.295  4.295 173.329 <2e-16 ***
## s(sleep_z):time  1.000  1.000   0.003  0.957
## ---
## Signif. codes:  0 '***' 0.001 '**' 0.01 '*' 0.05 '.' 0.1 ' ' 1
##
## R-sq.(adj) =  0.536
## lmer.REML = 3721.1  Scale est. = 0.010287  n = 8171

```

Below are plots of a plot of `s(bl_age)`, `s(bl_age):sleep_z`, `s(bl_age):time`, and `s(sleep_z):time`. For `s(sleep_z):time`, roughly, if we cannot fit a straight line through the confidence bands, there is evidence that the effect of time depends on sleep duration. It is correct that the confidence interval is zero at one point along the axis; this happens because we do not include the main effect.

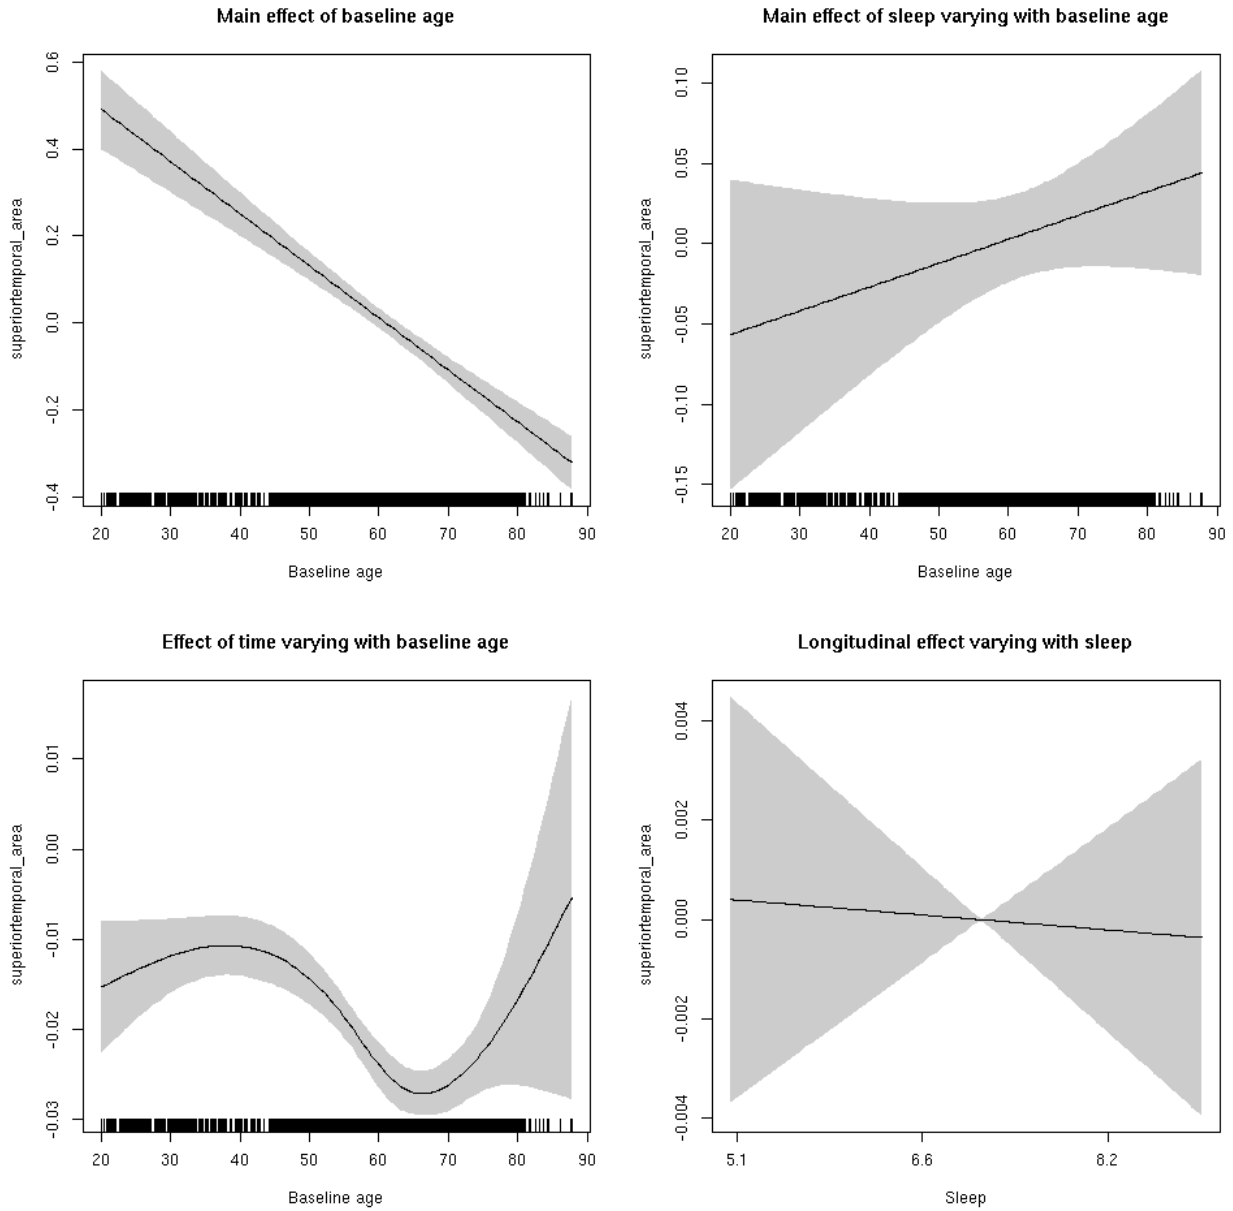

**Restricted to sleep  $\geq 5$  and  $\leq 9$  hours** Below is the row for `s(sleep_z):time` from the model output.

```
## s(sleep_z):time  1.0  1.0  0.040  0.842
```

Below are plots of a plot of `s(bl_age)`, `s(bl_age):sleep_z`, `s(bl_age):time`, and `s(sleep_z):time`. For `s(sleep_z):time`, roughly, if we cannot fit a straight line through the confidence bands, there is evidence that the effect of time depends on sleep duration. It is correct that the confidence interval is zero at one point along the axis; this happens because we do not include the main effect.



### superiortemporal\_thickness: Stratified by sex

**Female: Full data** Below is the row for `s(sleep_z):time` from the model output.

```
## s(sleep_z):time  1.000  1.000  0.634  0.426
```

Below are plots of a plot of `s(bl_age)`, `s(bl_age):sleep_z`, `s(bl_age):time`, and `s(sleep_z):time`. For `s(sleep_z):time`, roughly, if we cannot fit a straight line through the confidence bands, there is evidence that the effect of time depends on sleep duration. It is correct that the confidence interval is zero at one point along the axis; this happens because we do not include the main effect.

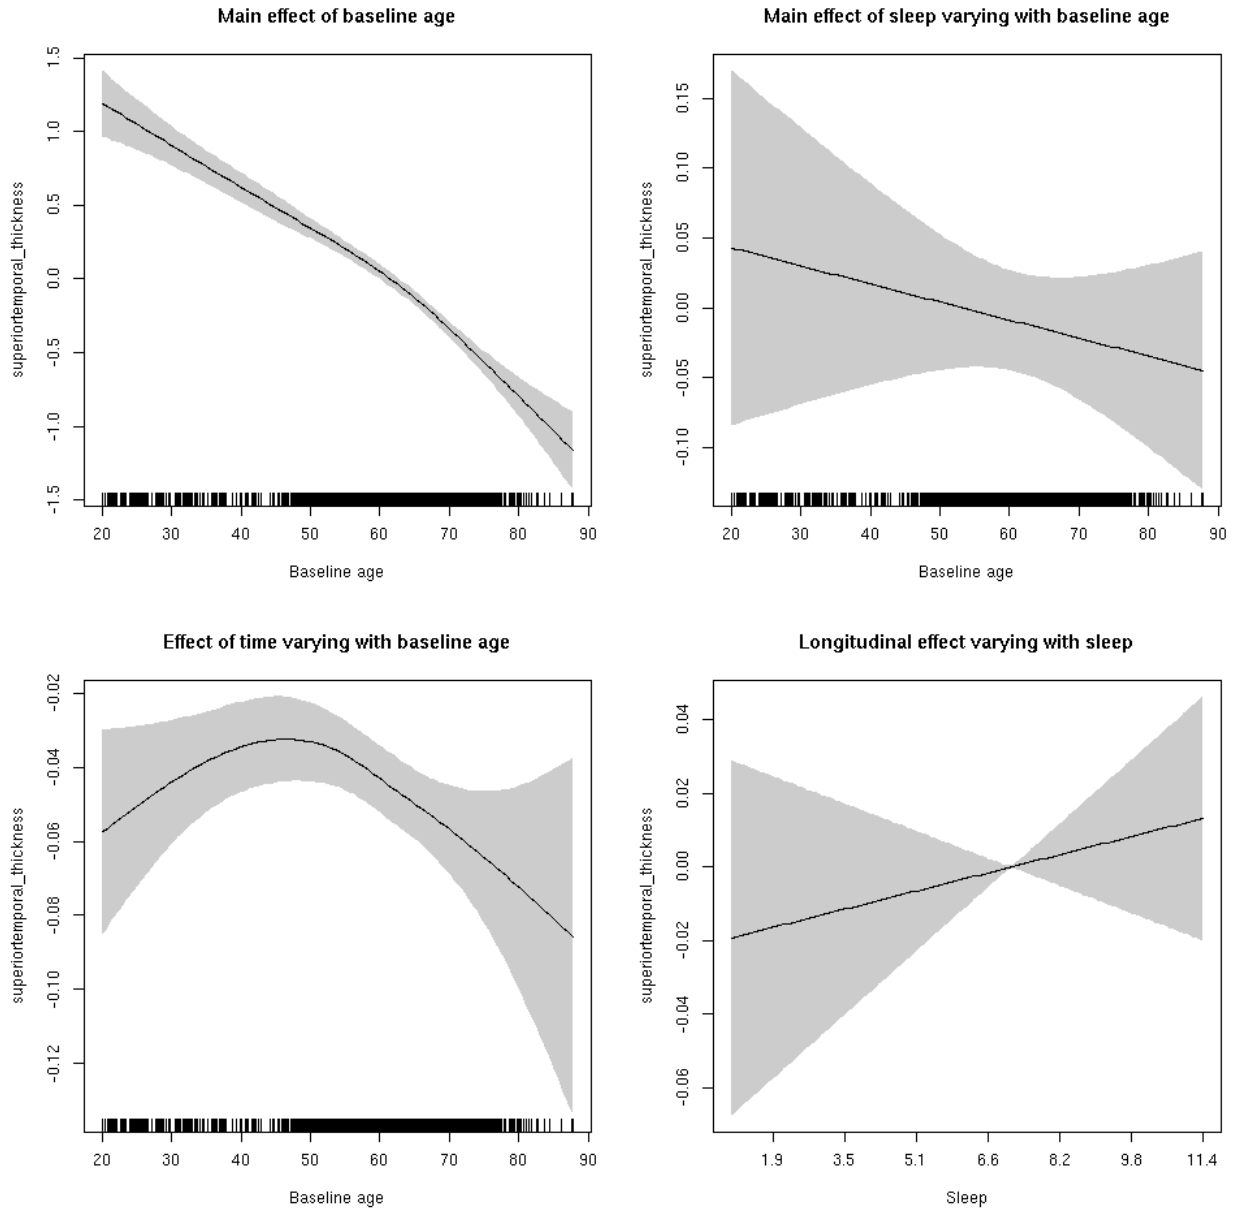

**Male: Full data** Below is the row for `s(sleep_z):time` from the model output.

```
## s(sleep_z):time  1.000  1.000  0.240  0.625
```

Below are plots of a plot of `s(bl_age)`, `s(bl_age):sleep_z`, `s(bl_age):time`, and `s(sleep_z):time`. For `s(sleep_z):time`, roughly, if we cannot fit a straight line through the confidence bands, there is evidence that the effect of time depends on sleep duration. It is correct that the confidence interval is zero at one point along the axis; this happens because we do not include the main effect.

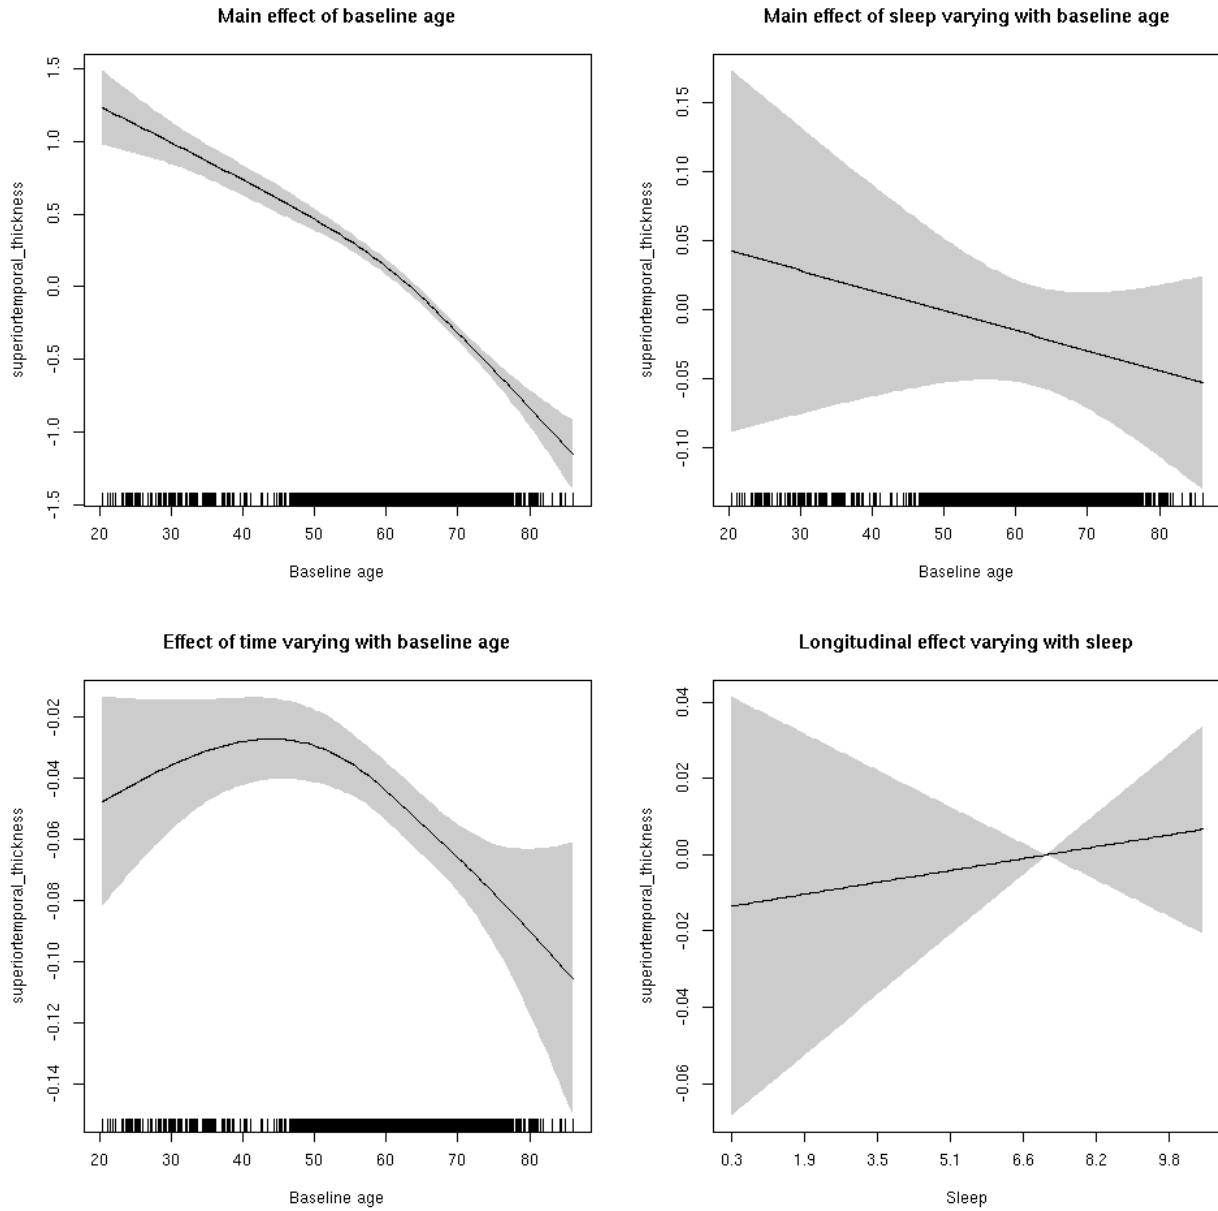

## superiortemporal\_thickness

**Full data** Below is the model output. The term `s(sleep_z):time` is probably what we care most about.

```
##
## Family: gaussian
## Link function: identity
##
## Formula:
## value ~ sex + site + s(bl_age, k = 10, bs = "cr") + s(bl_age,
##   by = sleep_z, bs = "cr") + +s(bl_age, by = time, k = 5, bs = "cr") +
##   s(sleep_z, by = time, k = 5, bs = "cr", pc = 0)
## <environment: 0x5630035d1d88>
```

```

##
## Parametric coefficients:
##           Estimate Std. Error t value Pr(>|t|)
## (Intercept) -1.27183    0.04806 -26.464 < 2e-16 ***
## sexmale      0.08185    0.02411   3.396 0.000688 ***
## siteousAvanto 0.07115    0.06371   1.117 0.264081
## siteousPrisma 0.27432    0.25948   1.057 0.290454
## siteousSkyra  0.31245    0.06368   4.907 9.43e-07 ***
## siteUB       0.17430    0.12780   1.364 0.172660
## siteUCAM     0.23506    0.06614   3.554 0.000382 ***
## siteUKB     1.49102    0.04872  30.607 < 2e-16 ***
## siteUmU     -0.42296    0.07925  -5.337 9.72e-08 ***
## ---
## Signif. codes:  0 '***' 0.001 '**' 0.01 '*' 0.05 '.' 0.1 ' ' 1
##
## Approximate significance of smooth terms:
##           edf Ref.df      F p-value
## s(bl_age)      3.575  3.575 273.627 <2e-16 ***
## s(bl_age):sleep_z 2.000  2.000   2.001  0.135
## s(bl_age):time  3.677  3.677  95.771 <2e-16 ***
## s(sleep_z):time  1.000  1.000   1.045  0.307
## ---
## Signif. codes:  0 '***' 0.001 '**' 0.01 '*' 0.05 '.' 0.1 ' ' 1
##
## R-sq.(adj) =  0.473
## lmer.REML = 14454 Scale est. = 0.11395 n = 8174

```

Below are plots of a plot of `s(bl_age)`, `s(bl_age):sleep_z`, `s(bl_age):time`, and `s(sleep_z):time`. For `s(sleep_z):time`, roughly, if we cannot fit a straight line through the confidence bands, there is evidence that the effect of time depends on sleep duration. It is correct that the confidence interval is zero at one point along the axis; this happens because we do not include the main effect.

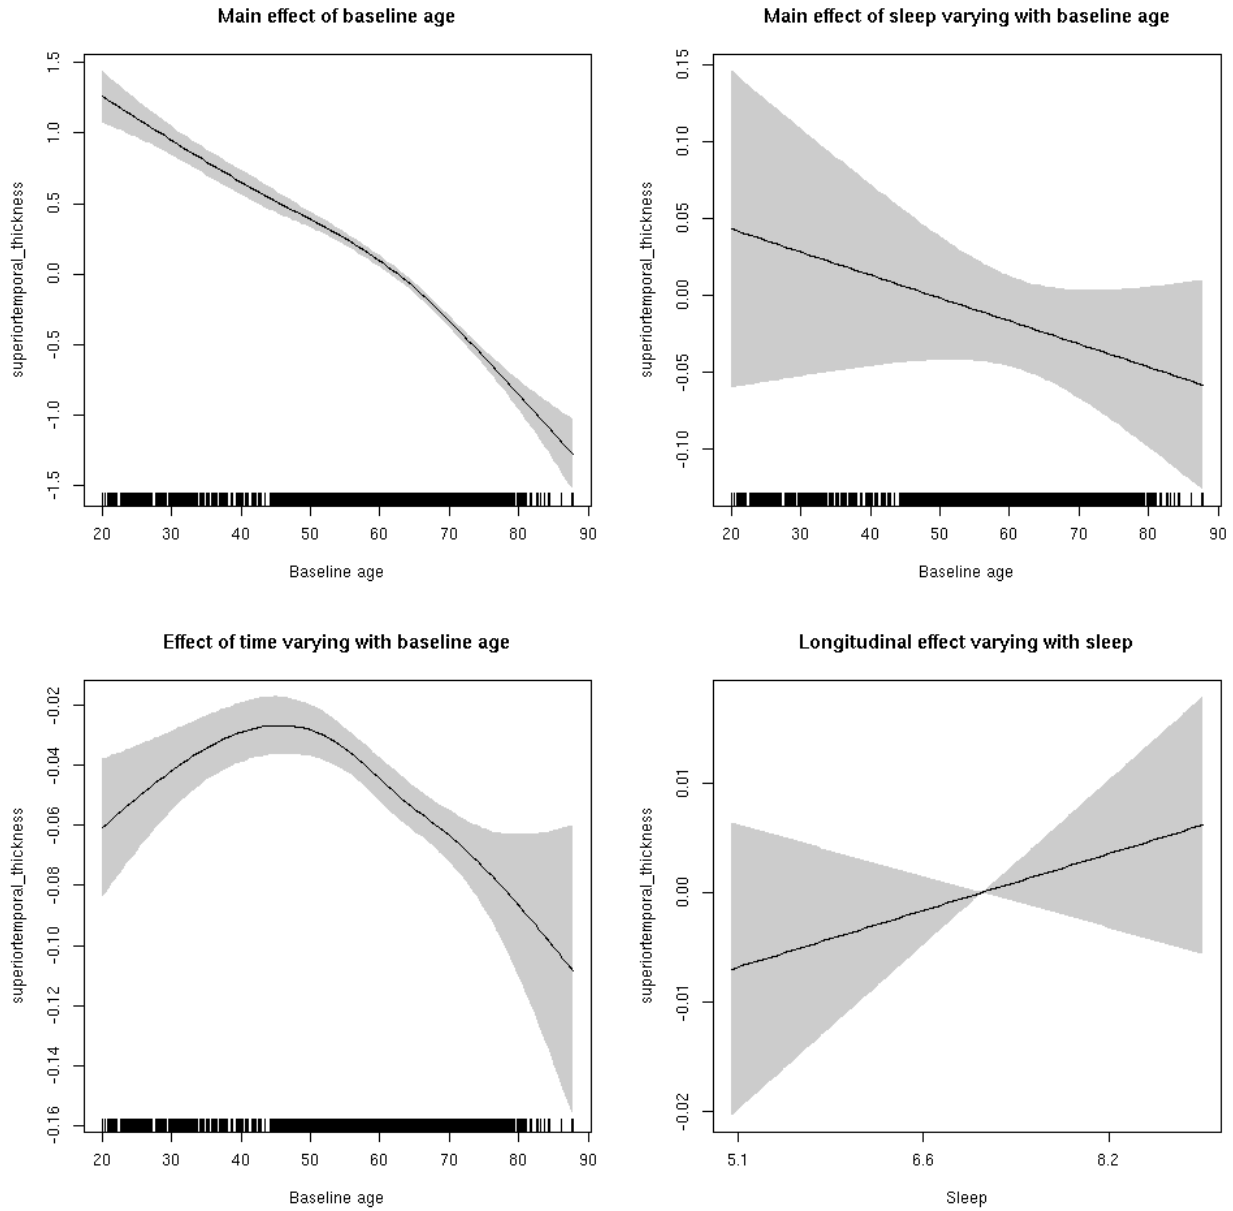

**Restricted to sleep  $\geq 5$  and  $\leq 9$  hours** Below is the row for `s(sleep_z):time` from the model output.

```
## s(sleep_z):time  1.000  1.000  1.096  0.295
```

Below are plots of a plot of `s(bl_age)`, `s(bl_age):sleep_z`, `s(bl_age):time`, and `s(sleep_z):time`. For `s(sleep_z):time`, roughly, if we cannot fit a straight line through the confidence bands, there is evidence that the effect of time depends on sleep duration. It is correct that the confidence interval is zero at one point along the axis; this happens because we do not include the main effect.



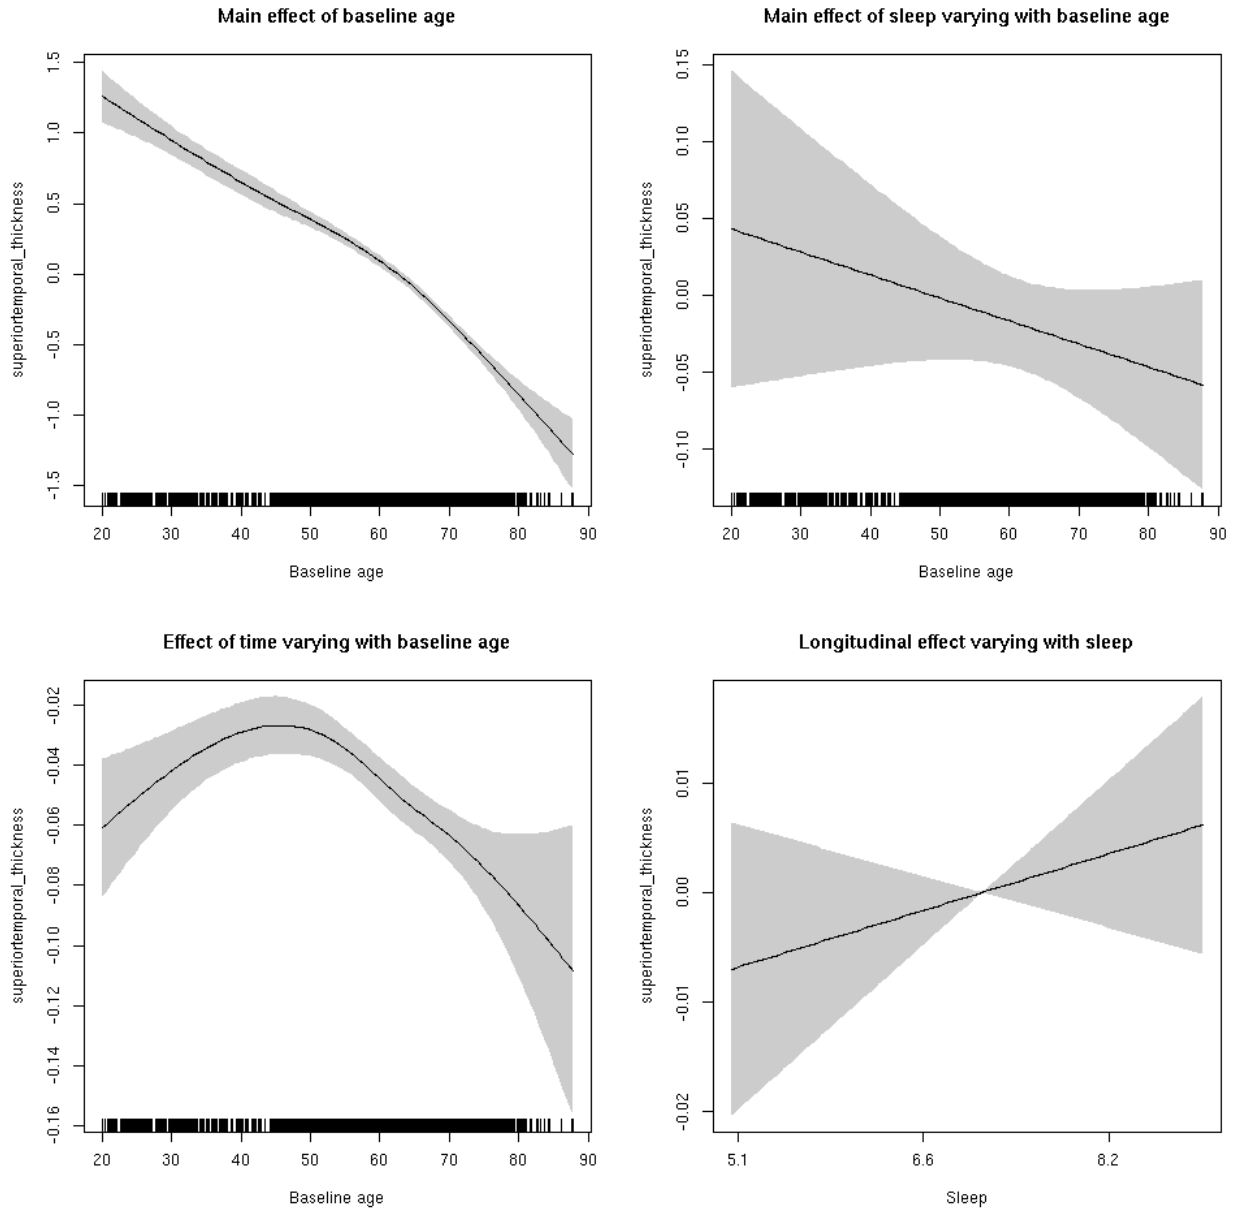

## superiortemporal\_volume: Stratified by sex

**Female: Full data** Below is the row for `s(sleep_z):time` from the model output.

```
## s(sleep_z):time  1.000  1.000  0.037  0.847
```

Below are plots of a plot of `s(bl_age)`, `s(bl_age):sleep_z`, `s(bl_age):time`, and `s(sleep_z):time`. For `s(sleep_z):time`, roughly, if we cannot fit a straight line through the confidence bands, there is evidence that the effect of time depends on sleep duration. It is correct that the confidence interval is zero at one point along the axis; this happens because we do not include the main effect.

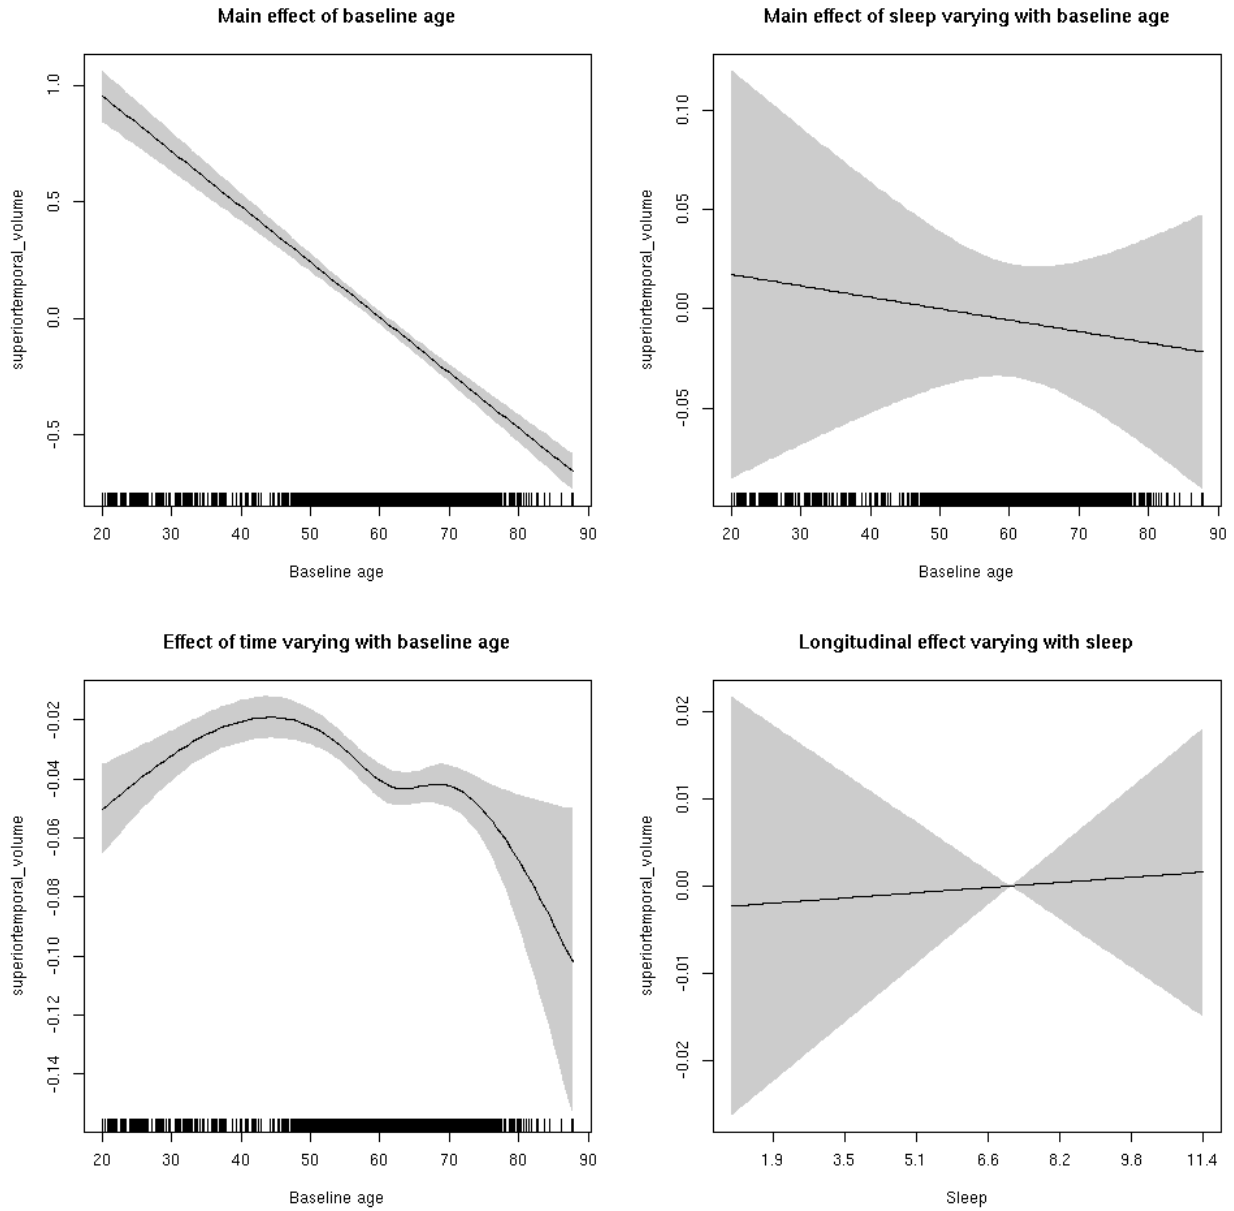

**Male: Full data** Below is the row for `s(sleep_z):time` from the model output.

```
## s(sleep_z):time  1.000  1.000  0.354  0.552
```

Below are plots of a plot of `s(bl_age)`, `s(bl_age):sleep_z`, `s(bl_age):time`, and `s(sleep_z):time`. For `s(sleep_z):time`, roughly, if we cannot fit a straight line through the confidence bands, there is evidence that the effect of time depends on sleep duration. It is correct that the confidence interval is zero at one point along the axis; this happens because we do not include the main effect.

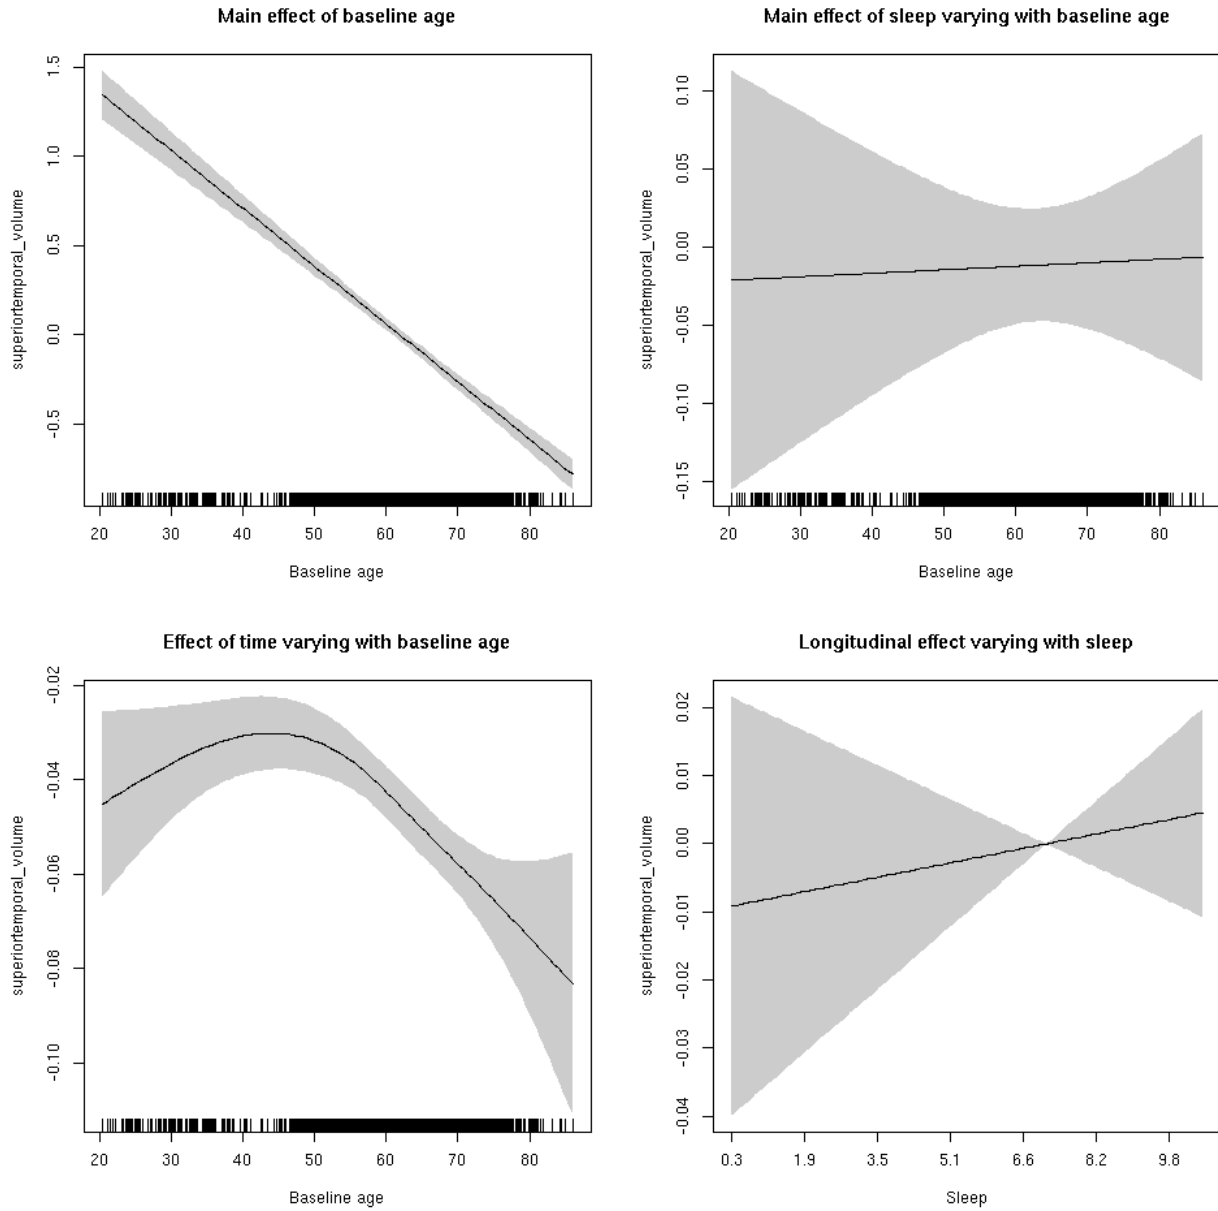

## superiortemporal\_volume

**Full data** Below is the model output. The term `s(sleep_z):time` is probably what we care most about.

```
##
## Family: gaussian
## Link function: identity
##
## Formula:
## value ~ sex + site + icv + s(bl_age, k = 10, bs = "cr") + s(bl_age,
##   by = sleep_z, bs = "cr") + +s(bl_age, by = time, k = 5, bs = "cr") +
##   s(sleep_z, by = time, k = 5, bs = "cr", pc = 0)
## <environment: 0x5630035aebc0>
```

```

##
## Parametric coefficients:
##           Estimate Std. Error t value Pr(>|t|)
## (Intercept)  0.04753   0.05168   0.920 0.357749
## sexmale      0.18112   0.02684   6.748 1.61e-11 ***
## siteousAvanto -0.72815  0.06372 -11.428 < 2e-16 ***
## siteousPrisma -0.57276  0.14994  -3.820 0.000135 ***
## siteousSkyra  -0.11954  0.06164  -1.939 0.052507 .
## siteUB       -0.58926  0.12014  -4.905 9.54e-07 ***
## siteUCAM     -0.53897  0.06432  -8.380 < 2e-16 ***
## siteUKB      0.02466  0.04815   0.512 0.608482
## siteUmU     -0.31502  0.07419  -4.246 2.20e-05 ***
## icv          0.56570  0.01320  42.855 < 2e-16 ***
## ---
## Signif. codes:  0 '***' 0.001 '**' 0.01 '*' 0.05 '.' 0.1 ' ' 1
##
## Approximate significance of smooth terms:
##           edf Ref.df      F p-value
## s(bl_age)      1.00   1.00 723.883 <2e-16 ***
## s(bl_age):sleep_z 2.00   2.00   0.631  0.532
## s(bl_age):time  4.47   4.47 205.403 <2e-16 ***
## s(sleep_z):time 1.00   1.00   0.322  0.570
## ---
## Signif. codes:  0 '***' 0.001 '**' 0.01 '*' 0.05 '.' 0.1 ' ' 1
##
## R-sq.(adj) =  0.538
## lmer.REML = 8283.2  Scale est. = 0.030977  n = 8172

```

Below are plots of a plot of  $s(\text{bl\_age})$ ,  $s(\text{bl\_age}):\text{sleep\_z}$ ,  $s(\text{bl\_age}):\text{time}$ , and  $s(\text{sleep\_z}):\text{time}$ . For  $s(\text{sleep\_z}):\text{time}$ , roughly, if we cannot fit a straight line through the confidence bands, there is evidence that the effect of time depends on sleep duration. It is correct that the confidence interval is zero at one point along the axis; this happens because we do not include the main effect.

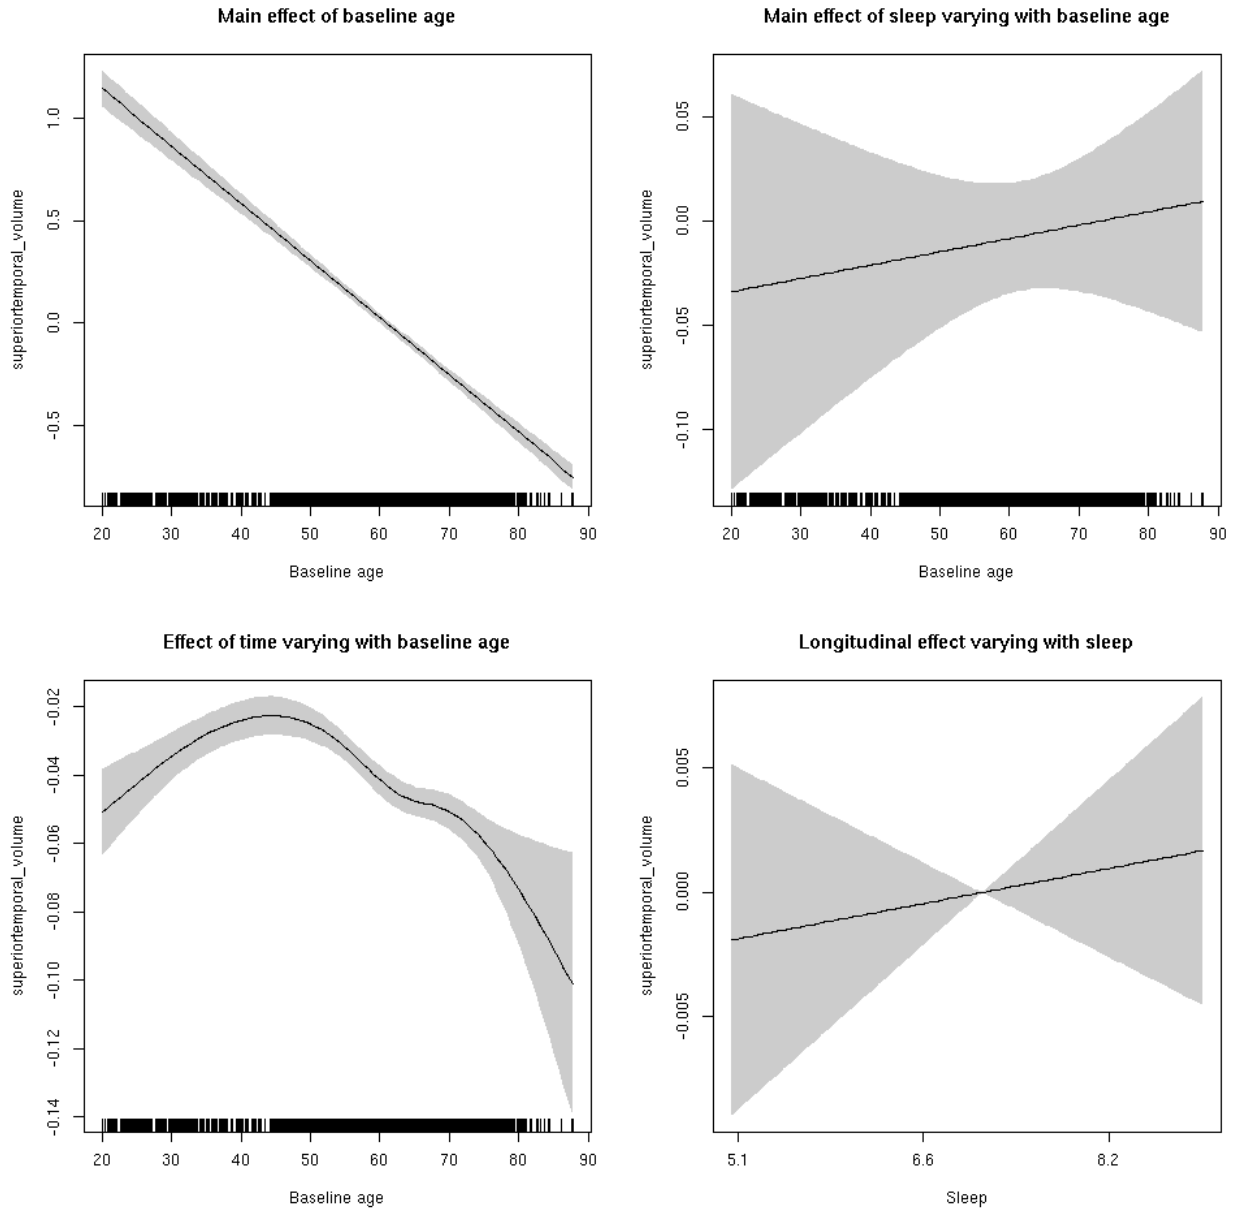

**Restricted to sleep  $\geq 5$  and  $\leq 9$  hours** Below is the row for `s(sleep_z):time` from the model output.

```
## s(sleep_z):time  1.000  1.000  0.293  0.588
```

Below are plots of a plot of `s(bl_age)`, `s(bl_age):sleep_z`, `s(bl_age):time`, and `s(sleep_z):time`. For `s(sleep_z):time`, roughly, if we cannot fit a straight line through the confidence bands, there is evidence that the effect of time depends on sleep duration. It is correct that the confidence interval is zero at one point along the axis; this happens because we do not include the main effect.

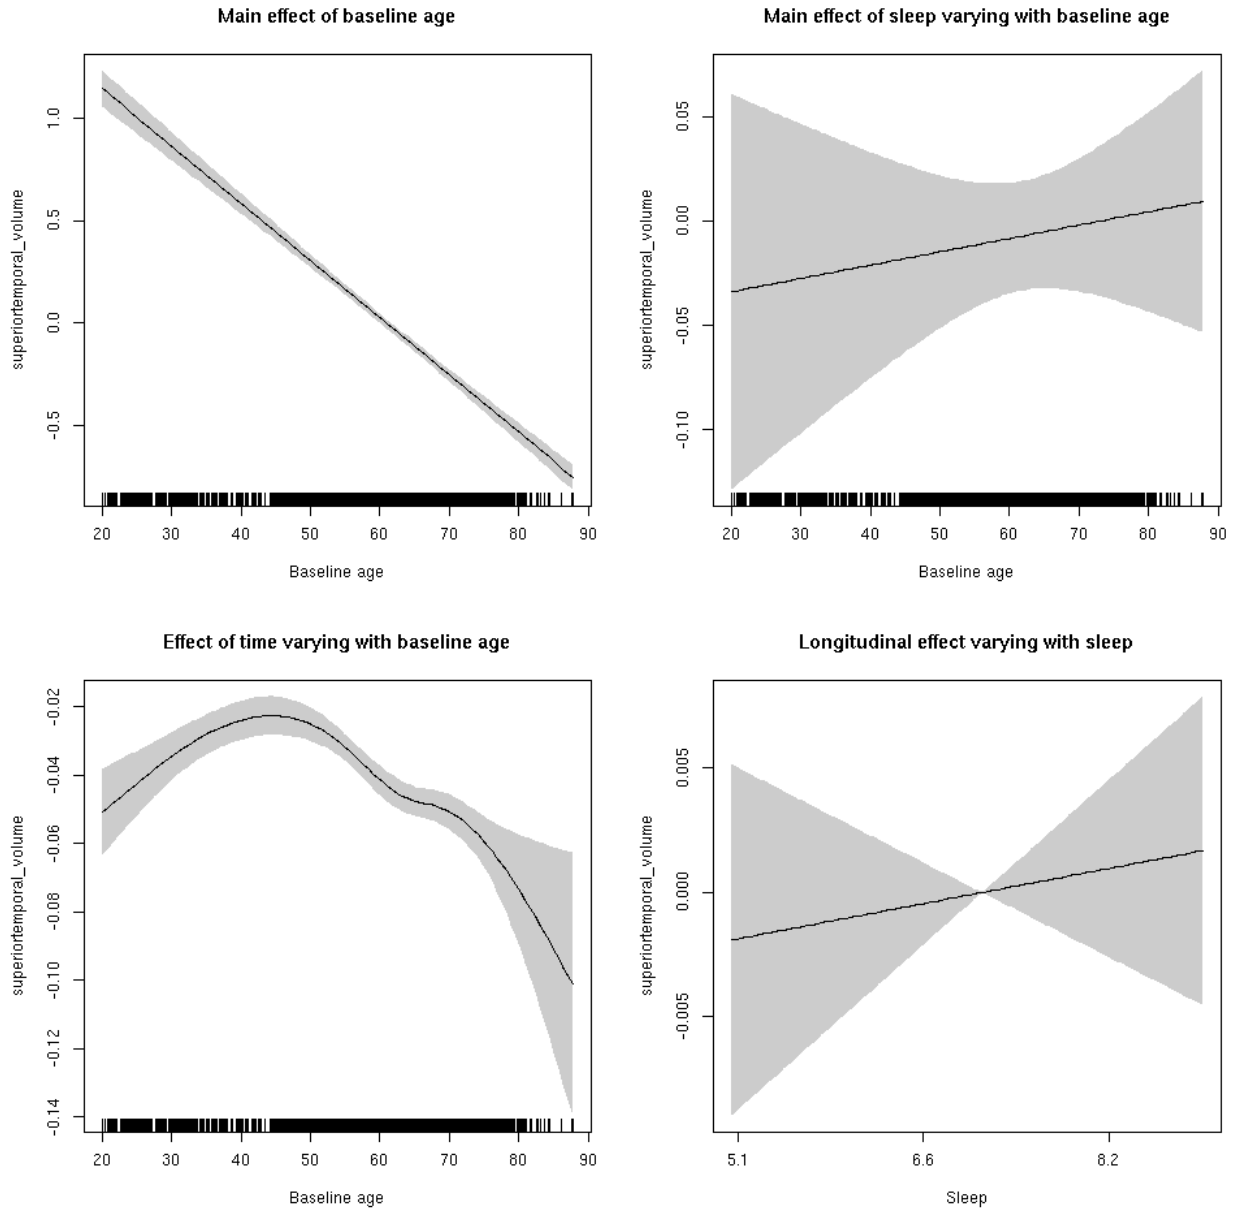

### supramarginal\_area: Stratified by sex

**Female: Full data** Below is the row for `s(sleep_z):time` from the model output.

```
## s(sleep_z):time  1.000  1.000  2.337  0.126
```

Below are plots of a plot of `s(bl_age)`, `s(bl_age):sleep_z`, `s(bl_age):time`, and `s(sleep_z):time`. For `s(sleep_z):time`, roughly, if we cannot fit a straight line through the confidence bands, there is evidence that the effect of time depends on sleep duration. It is correct that the confidence interval is zero at one point along the axis; this happens because we do not include the main effect.

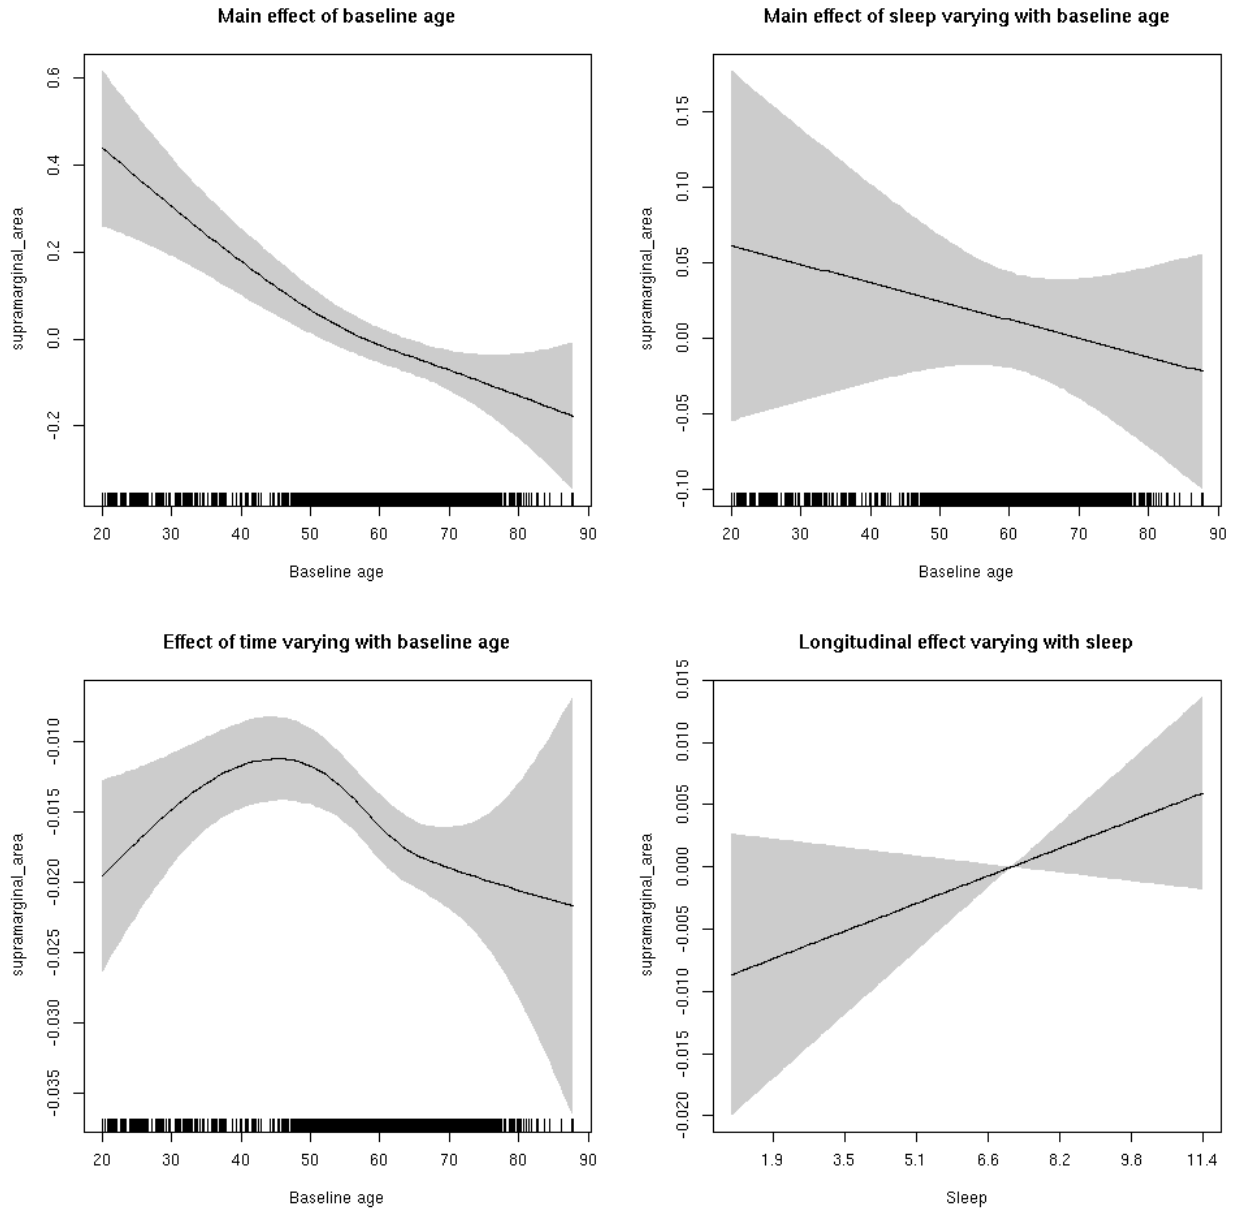

**Male: Full data** Below is the row for `s(sleep_z):time` from the model output.

```
## s(sleep_z):time  3.137  3.137  1.942  0.0759 .
```

Below are plots of a plot of `s(bl_age)`, `s(bl_age):sleep_z`, `s(bl_age):time`, and `s(sleep_z):time`. For `s(sleep_z):time`, roughly, if we cannot fit a straight line through the confidence bands, there is evidence that the effect of time depends on sleep duration. It is correct that the confidence interval is zero at one point along the axis; this happens because we do not include the main effect.

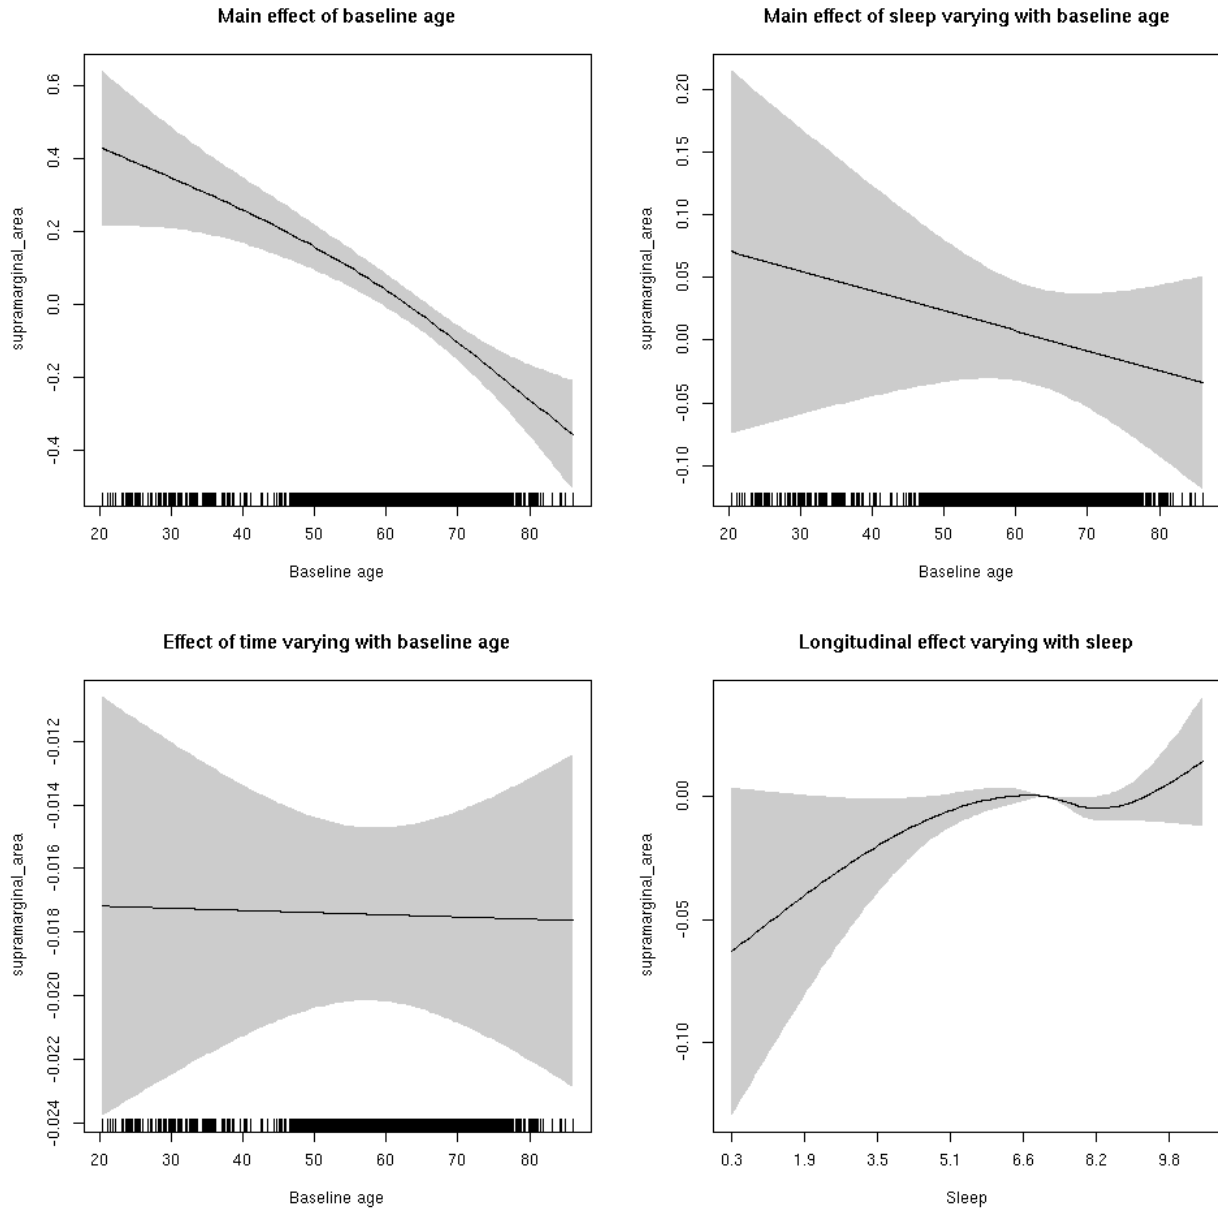

## supramarginal\_area

**Full data** Below is the model output. The term `s(sleep_z):time` is probably what we care most about.

```
##
## Family: gaussian
## Link function: identity
##
## Formula:
## value ~ sex + site + icv + s(bl_age, k = 10, bs = "cr") + s(bl_age,
##   by = sleep_z, bs = "cr") + +s(bl_age, by = time, k = 5, bs = "cr") +
##   s(sleep_z, by = time, k = 5, bs = "cr", pc = 0)
## <environment: 0x5630035aca00>
```



```

##
## Parametric coefficients:
##           Estimate Std. Error t value Pr(>|t|)
## (Intercept)  0.54140    0.05551   9.754 < 2e-16 ***
## sexmale      0.27559    0.02887   9.545 < 2e-16 ***
## siteousAvanto -0.79208    0.06842 -11.576 < 2e-16 ***
## siteousPrisma -0.90982    0.09599  -9.478 < 2e-16 ***
## siteousSkyra  -0.39428    0.06647  -5.932 3.12e-09 ***
## siteUB       -0.66046    0.13150  -5.022 5.21e-07 ***
## siteUCAM     -0.56823    0.06976  -8.145 4.34e-16 ***
## siteUKB      -0.64236    0.05200 -12.354 < 2e-16 ***
## siteUmU      -0.04162    0.08080  -0.515  0.606
## icv          0.53952    0.01362  39.603 < 2e-16 ***
## ---
## Signif. codes:  0 '***' 0.001 '**' 0.01 '*' 0.05 '.' 0.1 ' ' 1
##
## Approximate significance of smooth terms:
##           edf Ref.df      F p-value
## s(bl_age)      1.000  1.000 85.047 <2e-16 ***
## s(bl_age):sleep_z 2.000  2.000  1.427  0.240
## s(bl_age):time  3.129  3.129 214.130 <2e-16 ***
## s(sleep_z):time  1.000  1.000  1.149  0.284
## ---
## Signif. codes:  0 '***' 0.001 '**' 0.01 '*' 0.05 '.' 0.1 ' ' 1
##
## R-sq.(adj) =  0.44
## lmer.REML = 2626.1 Scale est. = 0.007011 n = 8133

```

Below are plots of a plot of `s(bl_age)`, `s(bl_age):sleep_z`, `s(bl_age):time`, and `s(sleep_z):time`. For `s(sleep_z):time`, roughly, if we cannot fit a straight line through the confidence bands, there is evidence that the effect of time depends on sleep duration. It is correct that the confidence interval is zero at one point along the axis; this happens because we do not include the main effect.

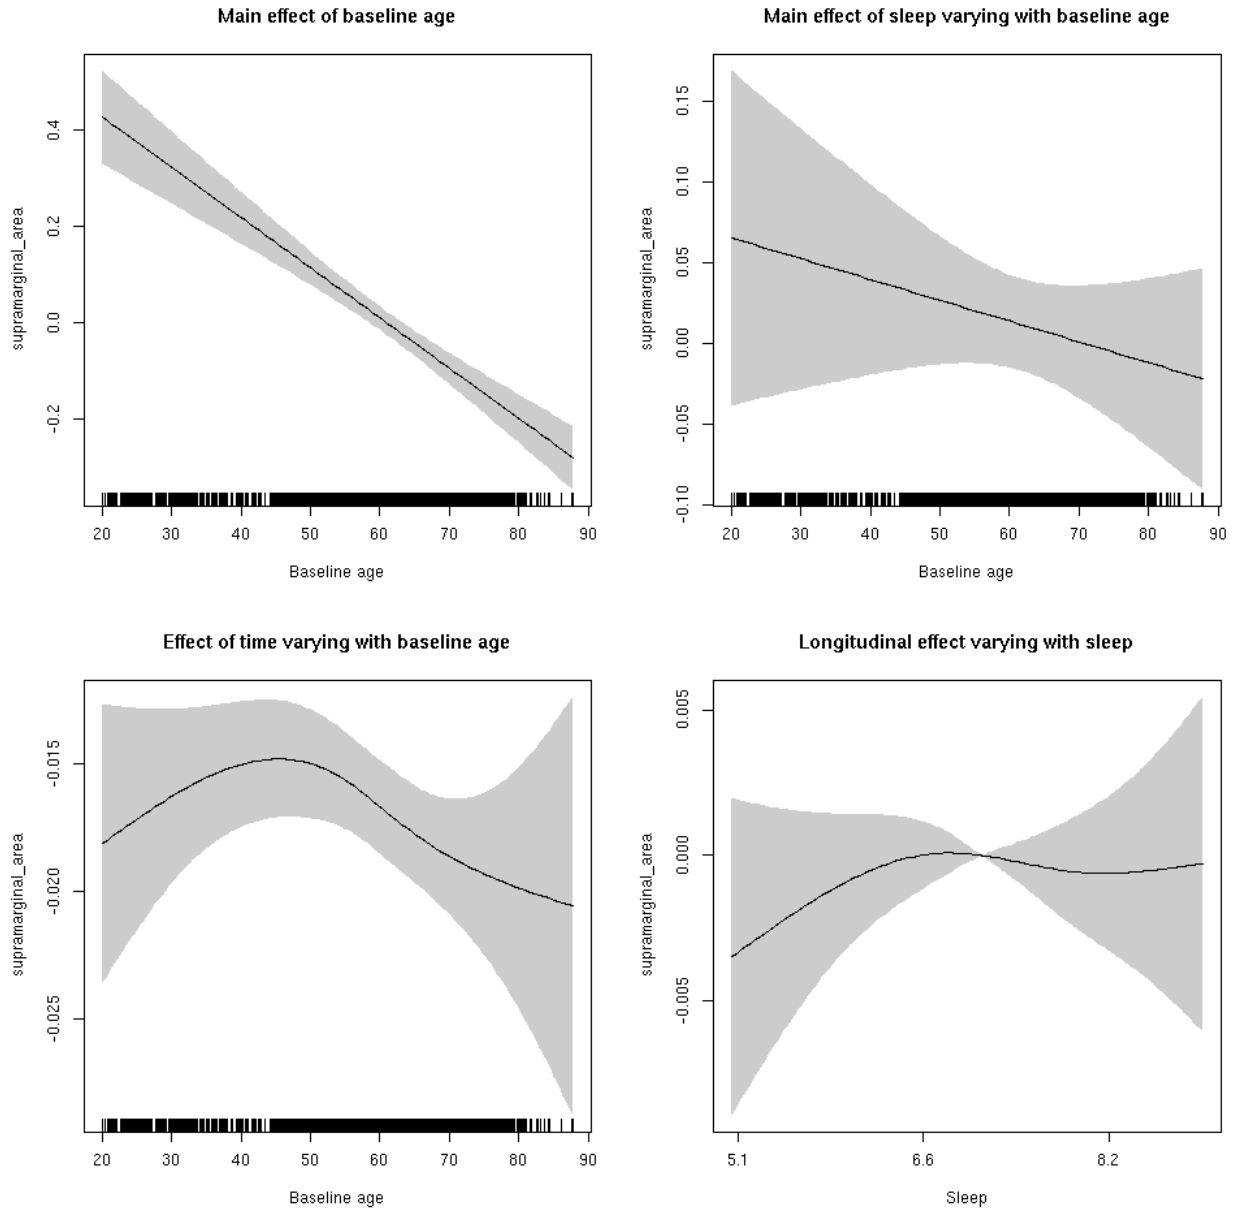

**Restricted to sleep  $\geq 5$  and  $\leq 9$  hours** Below is the row for `s(sleep_z):time` from the model output.

```
## s(sleep_z):time  1.862  1.862  0.524  0.530
```

Below are plots of a plot of `s(bl_age)`, `s(bl_age):sleep_z`, `s(bl_age):time`, and `s(sleep_z):time`. For `s(sleep_z):time`, roughly, if we cannot fit a straight line through the confidence bands, there is evidence that the effect of time depends on sleep duration. It is correct that the confidence interval is zero at one point along the axis; this happens because we do not include the main effect.

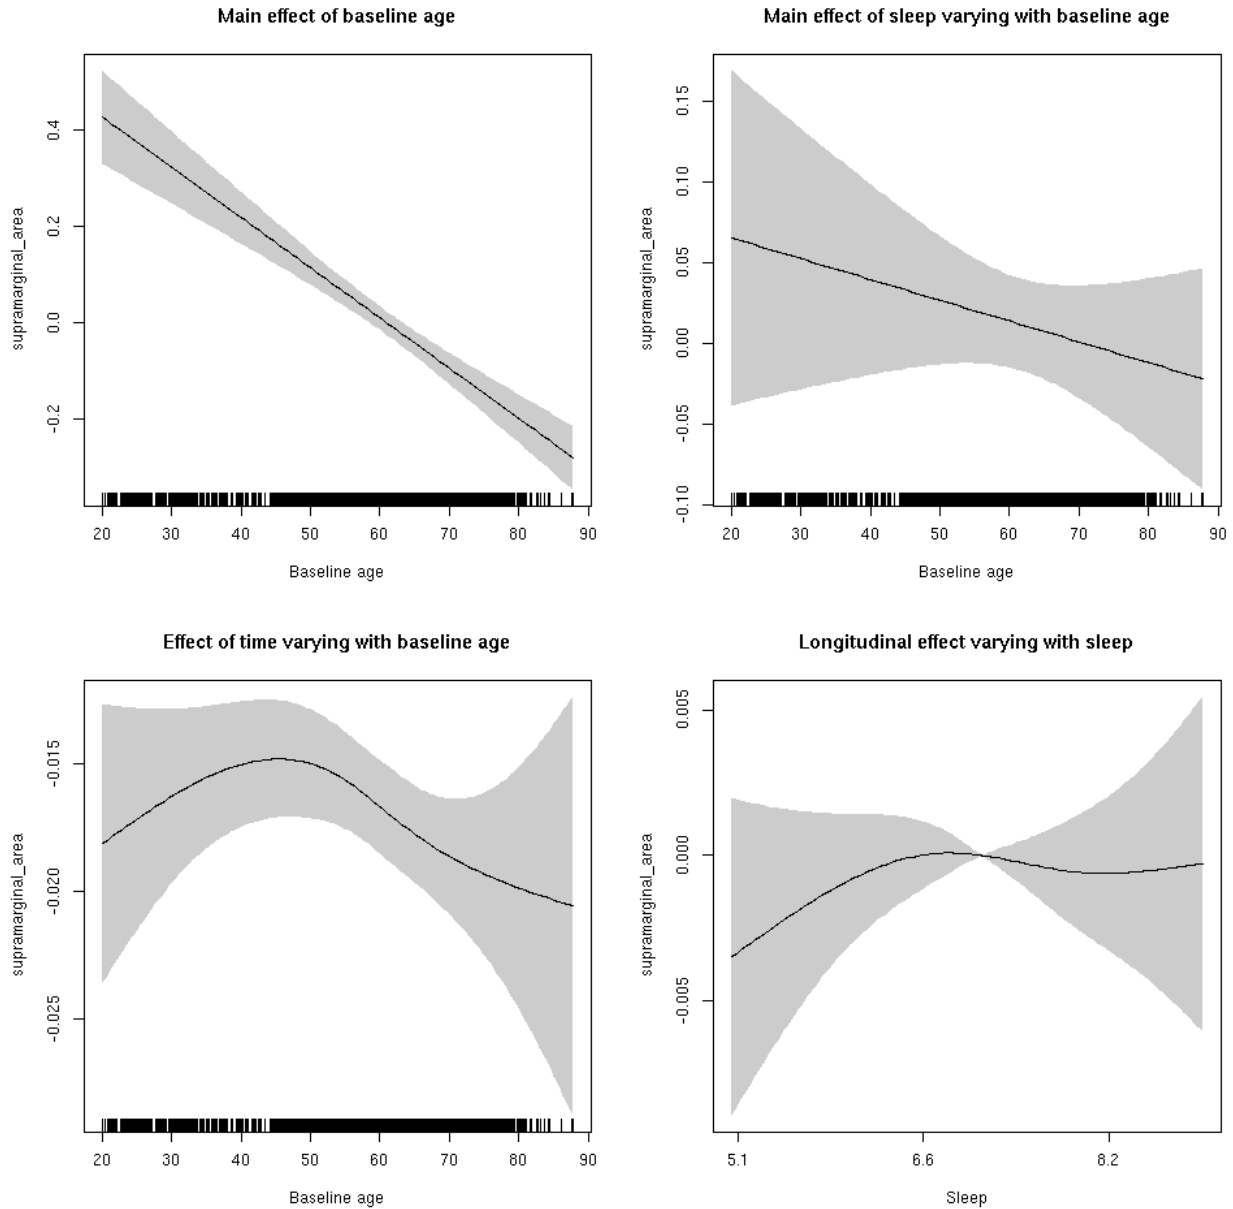

### supramarginal\_thickness: Stratified by sex

**Female: Full data** Below is the row for `s(sleep_z):time` from the model output.

```
## s(sleep_z):time  3.612  3.612  1.977  0.0569 .
```

Below are plots of a plot of `s(bl_age)`, `s(bl_age):sleep_z`, `s(bl_age):time`, and `s(sleep_z):time`. For `s(sleep_z):time`, roughly, if we cannot fit a straight line through the confidence bands, there is evidence that the effect of time depends on sleep duration. It is correct that the confidence interval is zero at one point along the axis; this happens because we do not include the main effect.

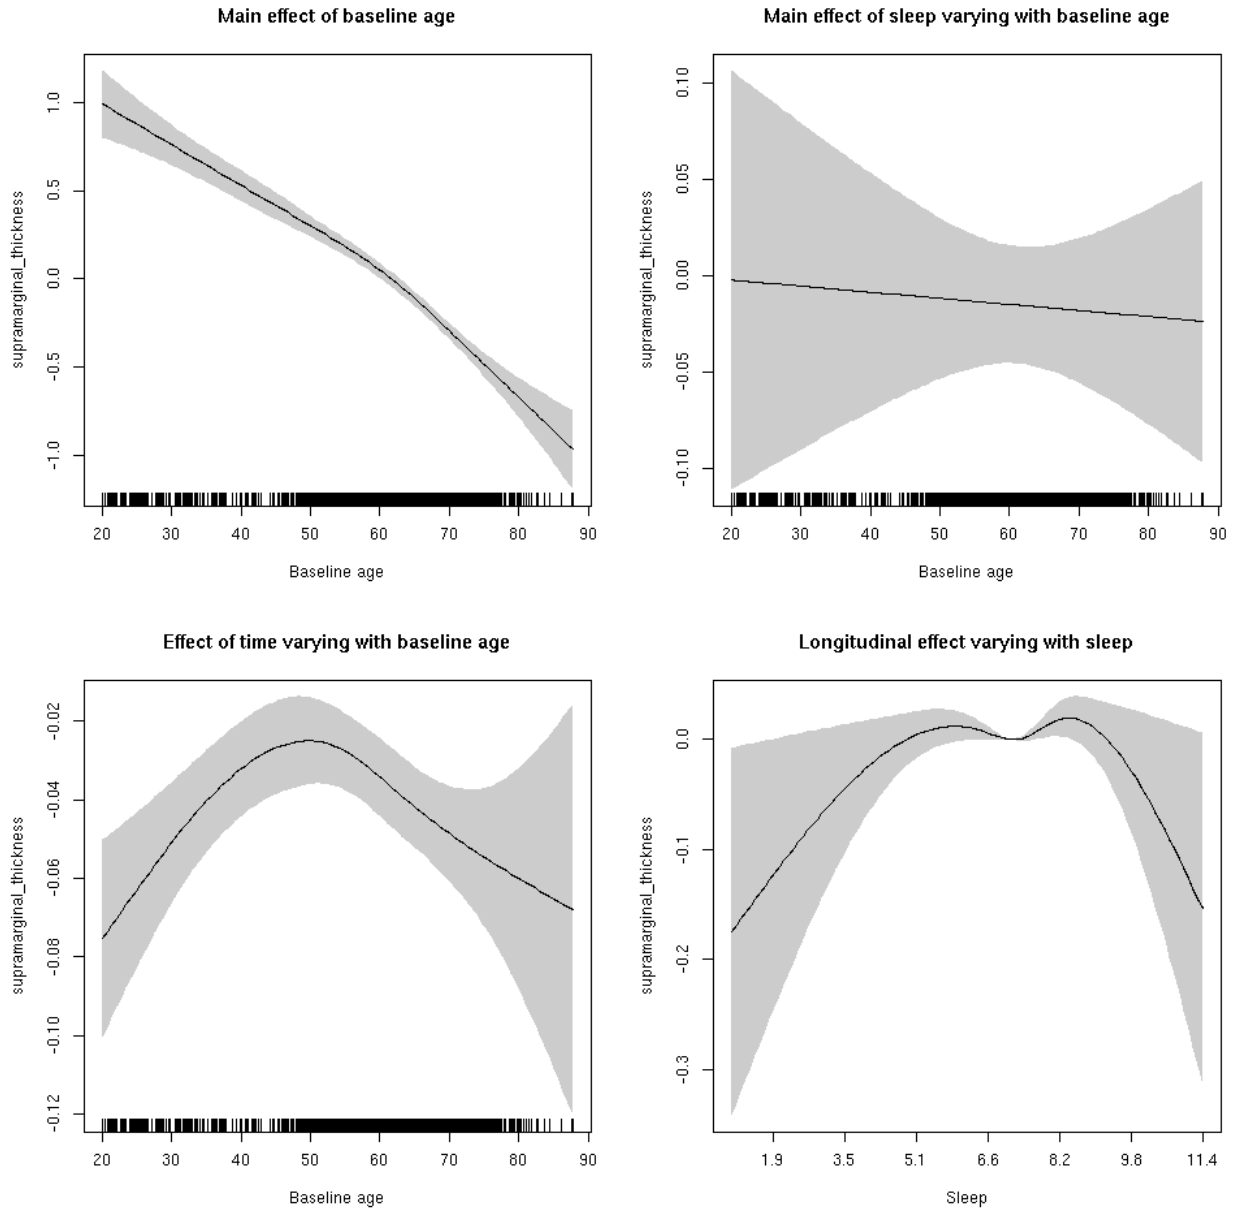

**Male: Full data** Below is the row for `s(sleep_z):time` from the model output.

```
## s(sleep_z):time  1.000  1.000  0.193  0.661
```

Below are plots of a plot of `s(bl_age)`, `s(bl_age):sleep_z`, `s(bl_age):time`, and `s(sleep_z):time`. For `s(sleep_z):time`, roughly, if we cannot fit a straight line through the confidence bands, there is evidence that the effect of time depends on sleep duration. It is correct that confidence interval is zero at one point along the axis; this happens because we do not include the main effect.

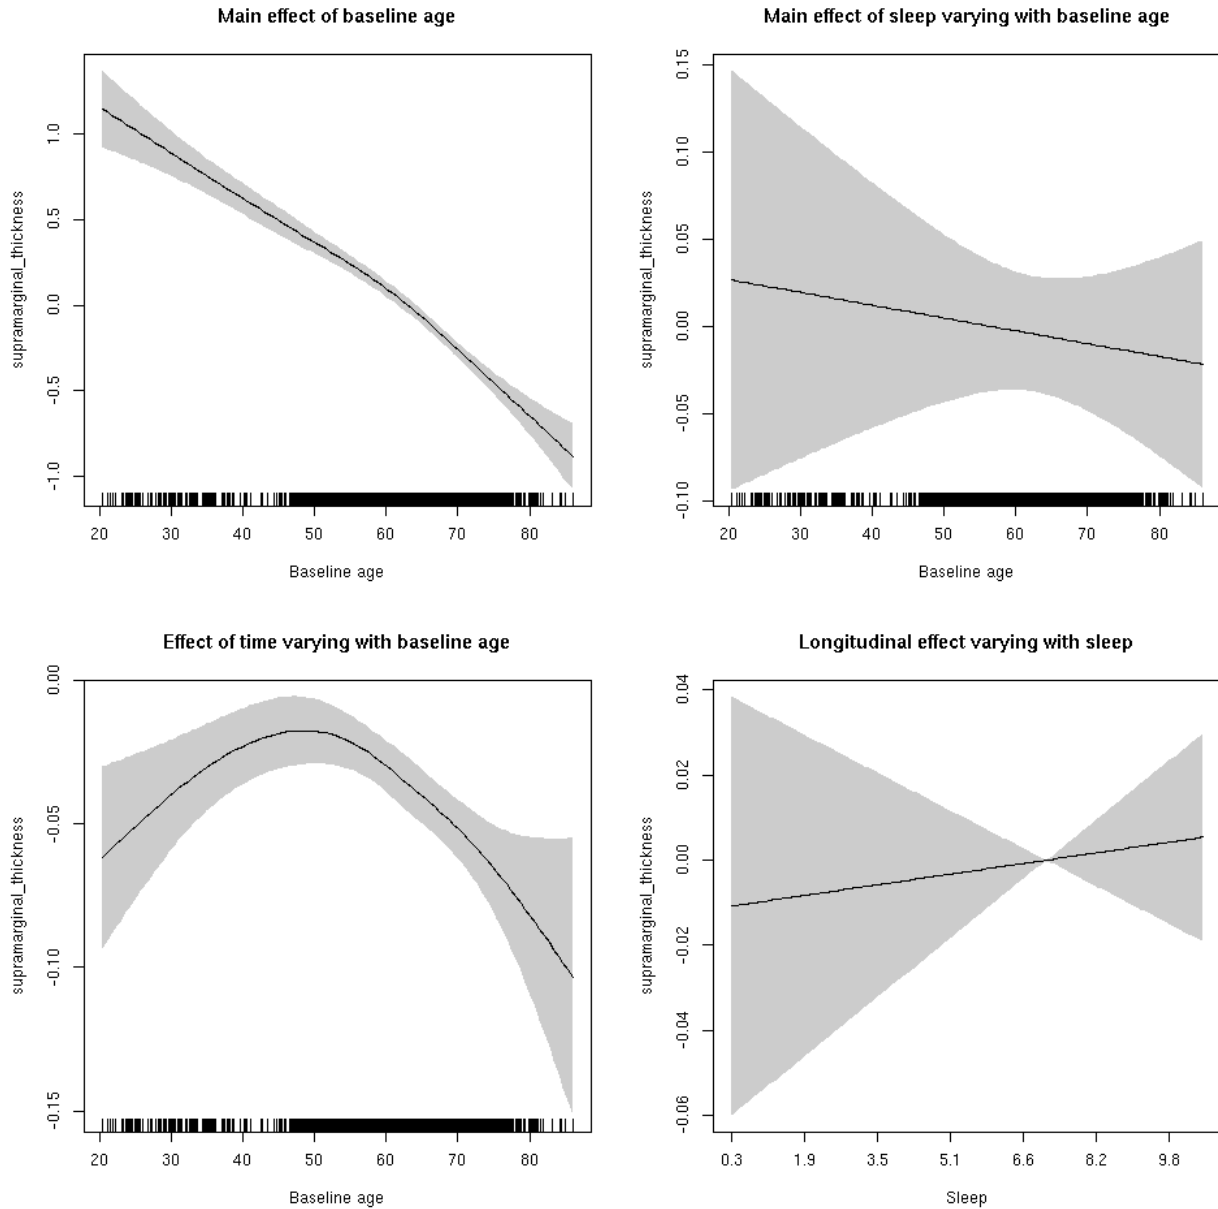

## supramarginal\_thickness

**Full data** Below is the model output. The term `s(sleep_z):time` is probably what we care most about.

```
##
## Family: gaussian
## Link function: identity
##
## Formula:
## value ~ sex + site + s(bl_age, k = 10, bs = "cr") + s(bl_age,
##   by = sleep_z, bs = "cr") + +s(bl_age, by = time, k = 5, bs = "cr") +
##   s(sleep_z, by = time, k = 5, bs = "cr", pc = 0)
## <environment: 0x5630035d3848>
```

```

##
## Parametric coefficients:
##           Estimate Std. Error t value Pr(>|t|)
## (Intercept) -1.81400    0.04248 -42.702 < 2e-16 ***
## sexmale     -0.09958    0.02132  -4.671 3.04e-06 ***
## siteousAvanto 0.16063    0.05626   2.855 0.00432 **
## siteousPrisma 0.59838    0.22586   2.649 0.00808 **
## siteousSkyra -0.15519    0.05625  -2.759 0.00581 **
## siteUB       0.58606    0.11303   5.185 2.21e-07 ***
## siteUCAM     0.51529    0.05844   8.817 < 2e-16 ***
## siteUKB      2.17801    0.04306  50.582 < 2e-16 ***
## siteUmU     -0.21081    0.07005  -3.009 0.00263 **
## ---
## Signif. codes:  0 '***' 0.001 '**' 0.01 '*' 0.05 '.' 0.1 ' ' 1
##
## Approximate significance of smooth terms:
##           edf Ref.df      F p-value
## s(bl_age)      3.510  3.510 252.609 <2e-16 ***
## s(bl_age):sleep_z 2.000  2.000   0.624  0.5357
## s(bl_age):time  3.865  3.865  49.261 <2e-16 ***
## s(sleep_z):time 3.639  3.639   2.551  0.0225 *
## ---
## Signif. codes:  0 '***' 0.001 '**' 0.01 '*' 0.05 '.' 0.1 ' ' 1
##
## R-sq.(adj) =  0.67
## lmer.REML = 12289 Scale est. = 0.085939 n = 8168

```

Below are plots of a plot of  $s(\text{bl\_age})$ ,  $s(\text{bl\_age}):\text{sleep\_z}$ ,  $s(\text{bl\_age}):\text{time}$ , and  $s(\text{sleep\_z}):\text{time}$ . For  $s(\text{sleep\_z}):\text{time}$ , roughly, if we cannot fit a straight line through the confidence bands, there is evidence that the effect of time depends on sleep duration. It is correct that the confidence interval is zero at one point along the axis; this happens because we do not include the main effect.

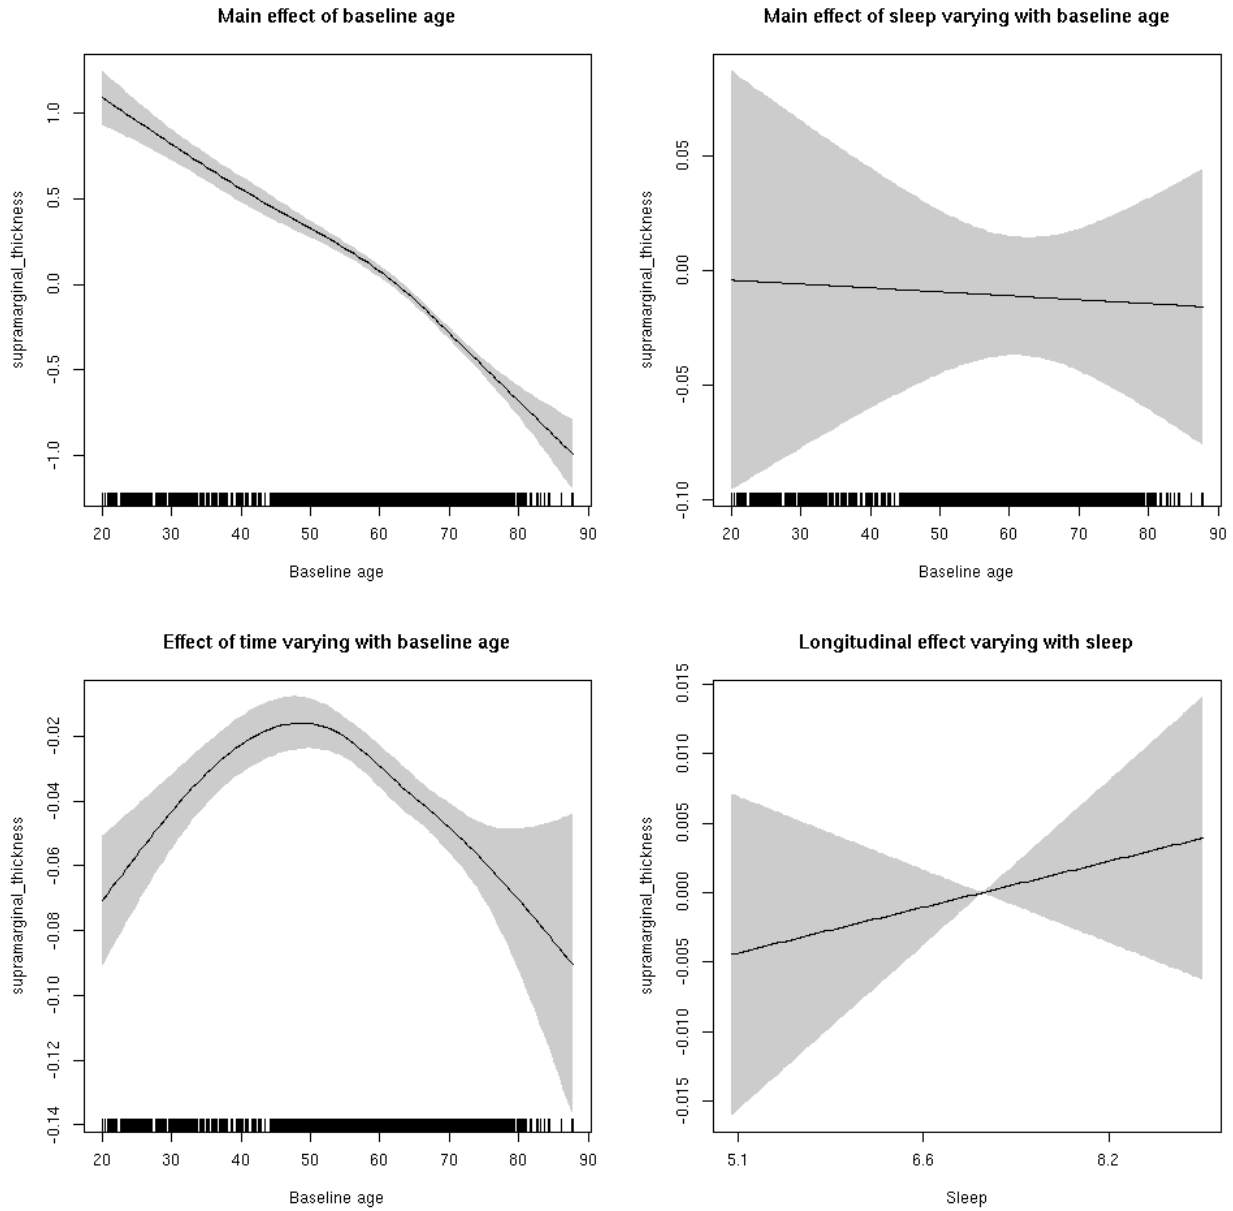

**Restricted to sleep  $\geq 5$  and  $\leq 9$  hours** Below is the row for `s(sleep_z):time` from the model output.

```
## s(sleep_z):time 1.001 1.001 0.592 0.441
```

Below are plots of a plot of `s(bl_age)`, `s(bl_age):sleep_z`, `s(bl_age):time`, and `s(sleep_z):time`. For `s(sleep_z):time`, roughly, if we cannot fit a straight line through the confidence bands, there is evidence that the effect of time depends on sleep duration. It is correct that the confidence interval is zero at one point along the axis; this happens because we do not include the main effect.

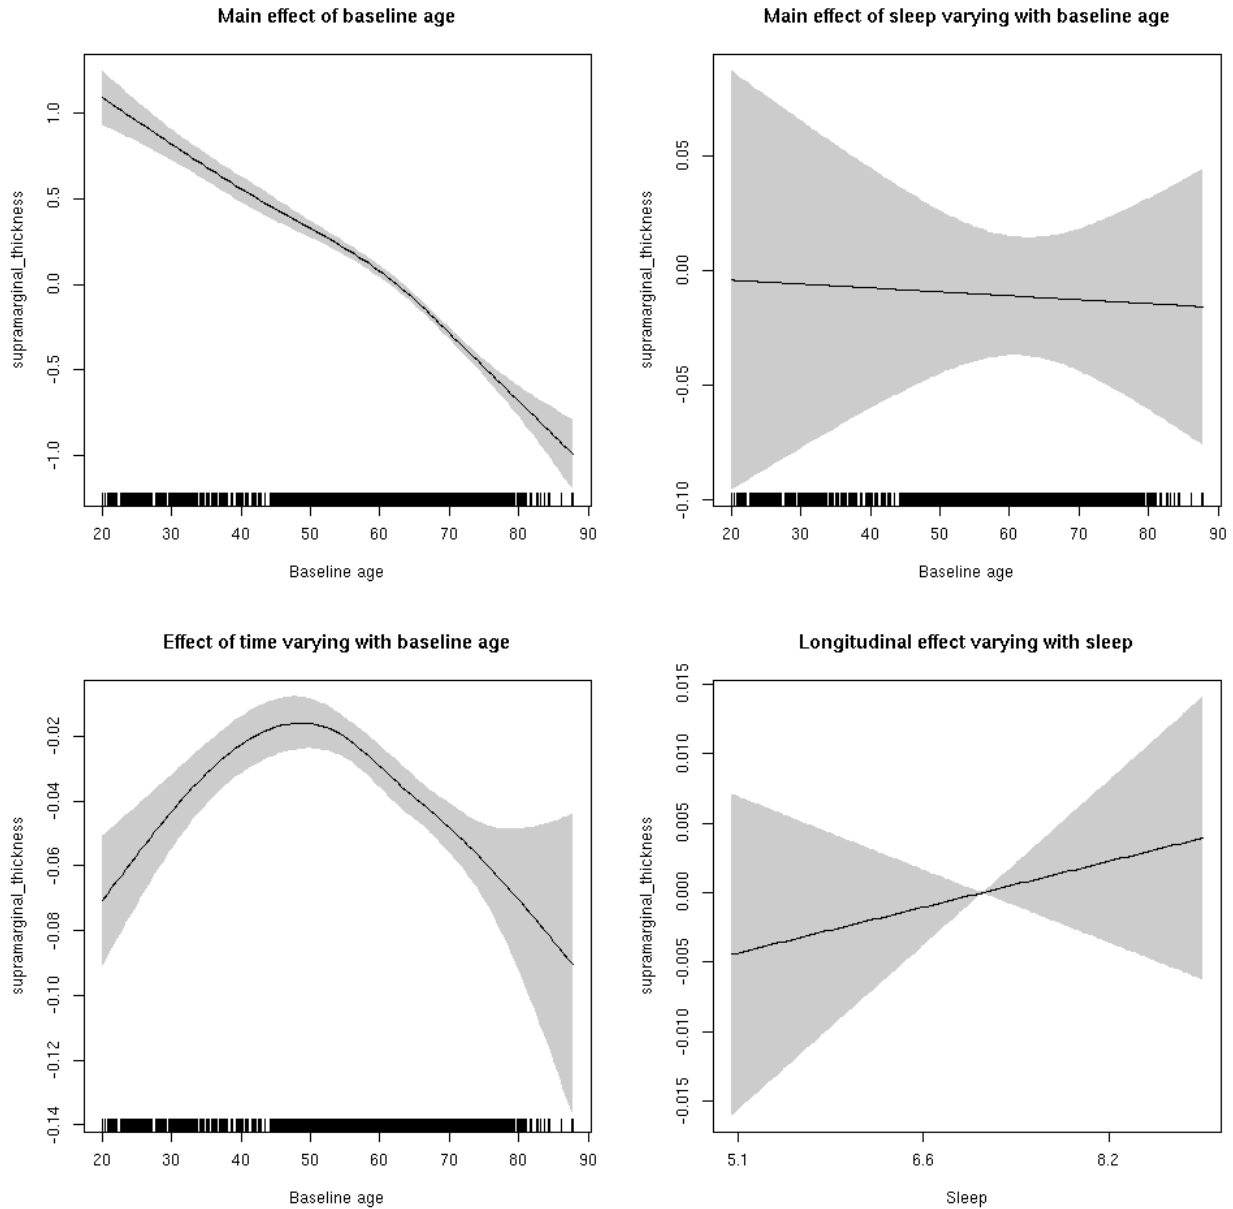

### supramarginal\_volume: Stratified by sex

**Female: Full data** Below is the row for `s(sleep_z):time` from the model output.

```
## s(sleep_z):time  3.665  3.665  1.991  0.0596 .
```

Below are plots of a plot of `s(bl_age)`, `s(bl_age):sleep_z`, `s(bl_age):time`, and `s(sleep_z):time`. For `s(sleep_z):time`, roughly, if we cannot fit a straight line through the confidence bands, there is evidence that the effect of time depends on sleep duration. It is correct that the confidence interval is zero at one point along the axis; this happens because we do not include the main effect.



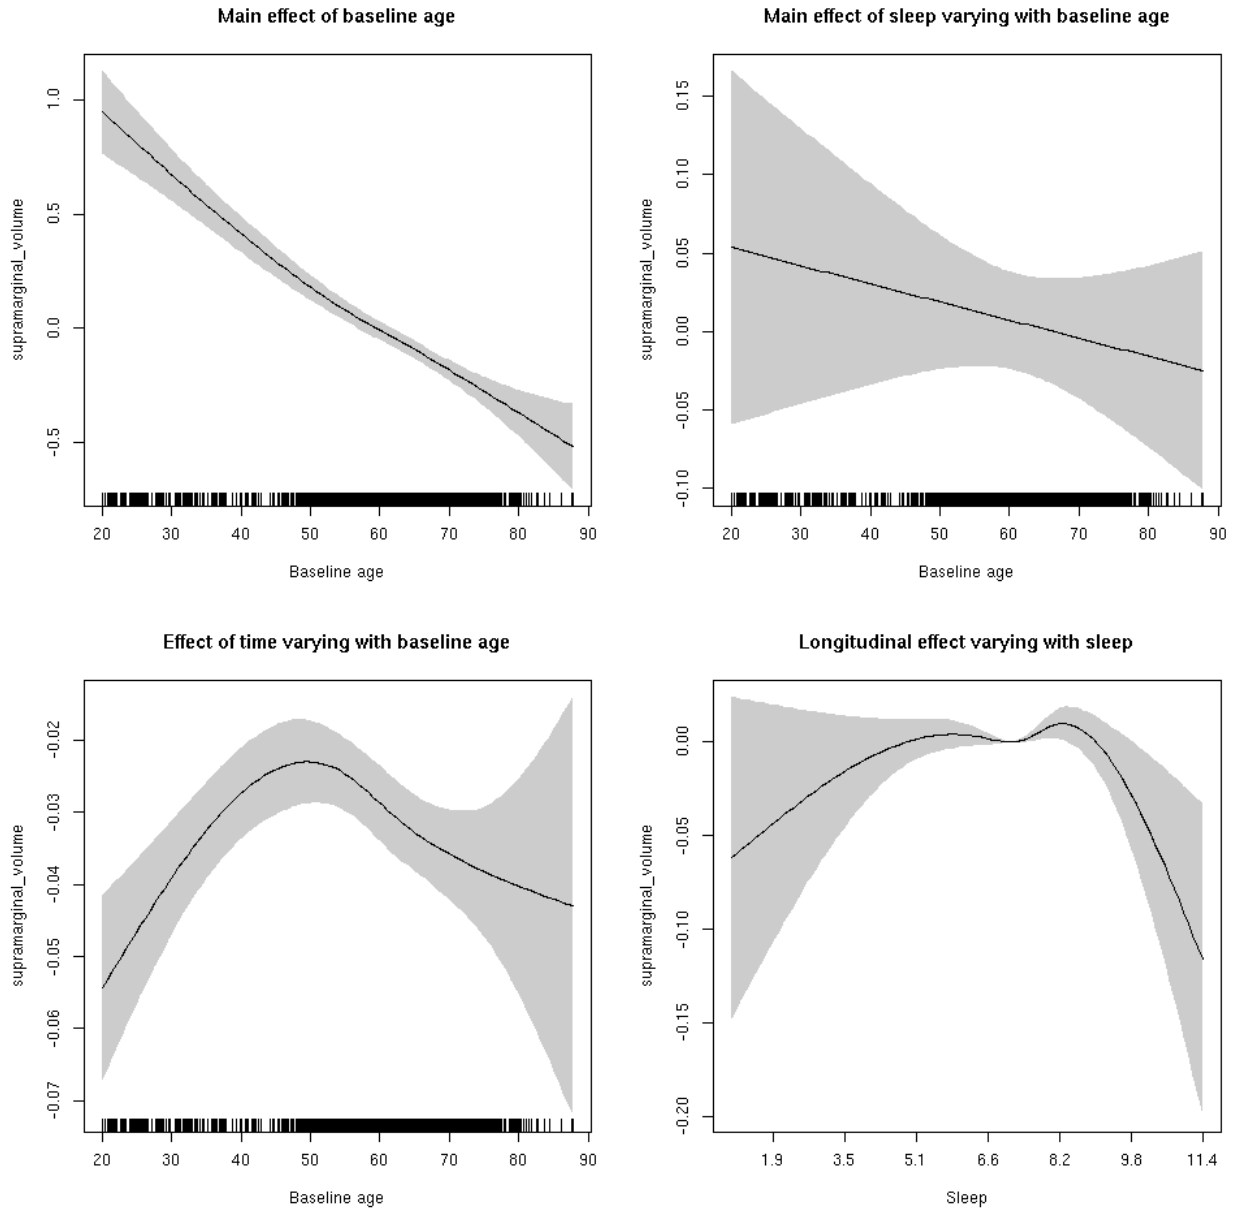

**Male: Full data** Below is the row for `s(sleep_z):time` from the model output.

```
## s(sleep_z):time 2.975 2.975 2.628 0.0455 *
```

Below are plots of a plot of `s(bl_age)`, `s(bl_age):sleep_z`, `s(bl_age):time`, and `s(sleep_z):time`. For `s(sleep_z):time`, roughly, if we cannot fit a straight line through the confidence bands, there is evidence that the effect of time depends on sleep duration. It is correct that the confidence interval is zero at one point along the axis; this happens because we do not include the main effect.

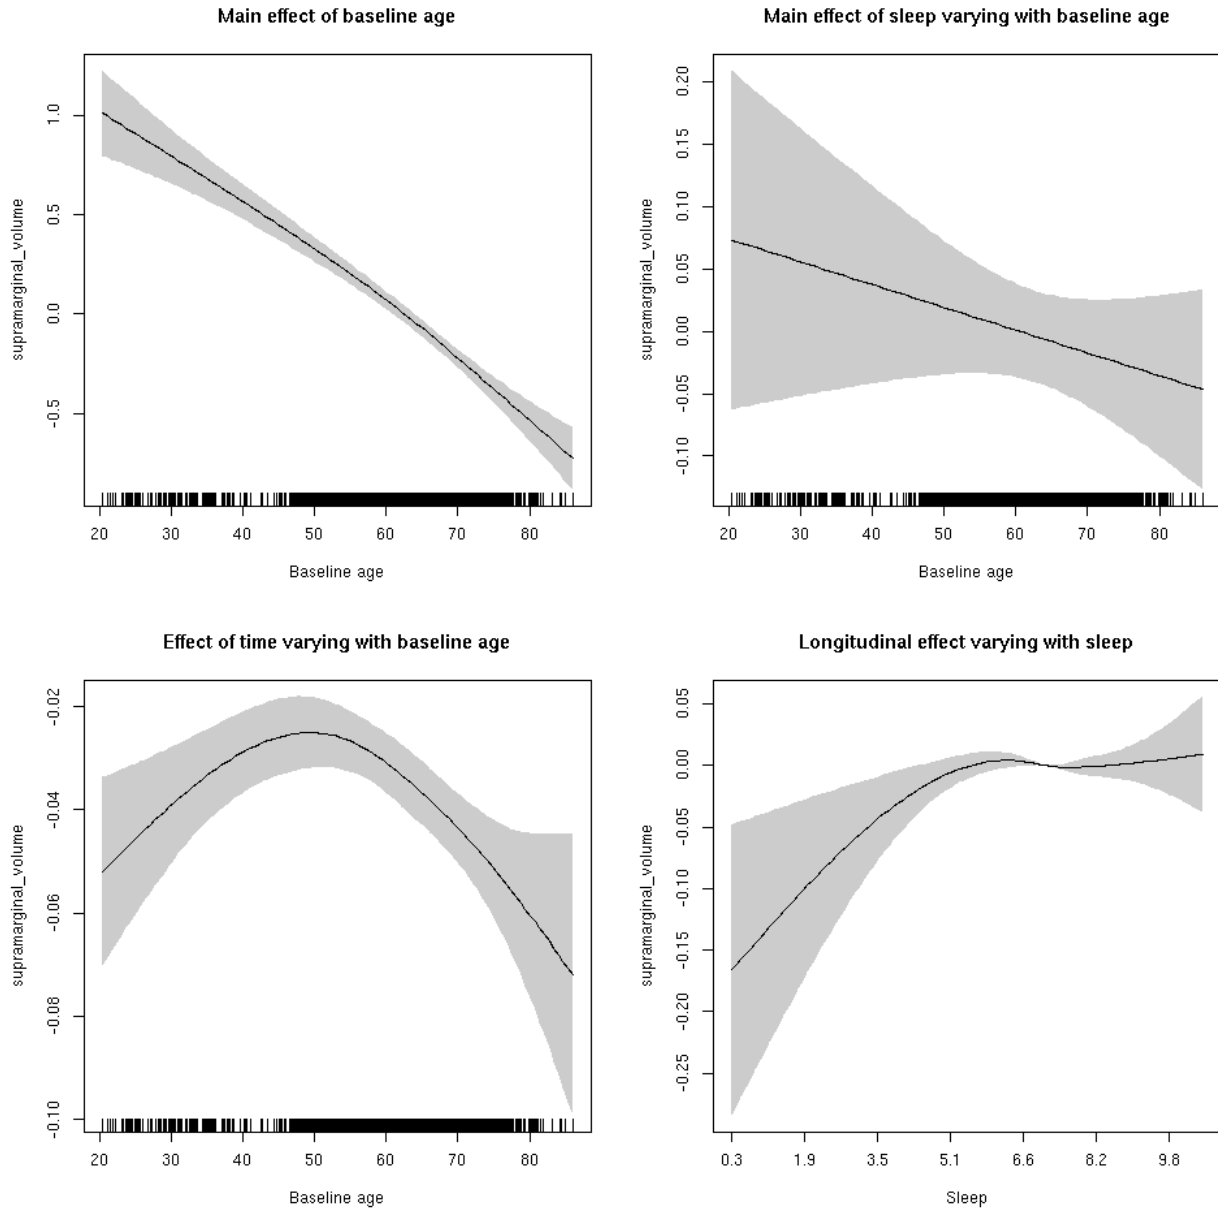

## supramarginal\_volume

**Full data** Below is the model output. The term `s(sleep_z):time` is probably what we care most about.

```
##
## Family: gaussian
## Link function: identity
##
## Formula:
## value ~ sex + site + icv + s(bl_age, k = 10, bs = "cr") + s(bl_age,
##   by = sleep_z, bs = "cr") + +s(bl_age, by = time, k = 5, bs = "cr") +
##   s(sleep_z, by = time, k = 5, bs = "cr", pc = 0)
## <environment: 0x5630035aaa00>
```

```

##
## Parametric coefficients:
##           Estimate Std. Error t value Pr(>|t|)
## (Intercept) -0.16470    0.05401  -3.049  0.00230 **
## sexmale      0.18369    0.02809   6.540 6.51e-11 ***
## siteousAvanto -0.77497    0.06646 -11.660 < 2e-16 ***
## siteousPrisma -0.57321    0.13667  -4.194 2.77e-05 ***
## siteousSkyra  -0.45577    0.06435  -7.083 1.53e-12 ***
## siteUB        -0.40996    0.12589  -3.257  0.00113 **
## siteUCAM      -0.41263    0.06727  -6.134 8.99e-10 ***
## siteUKB       0.25149    0.05035   4.994 6.02e-07 ***
## siteUmU       -0.17016    0.07762  -2.192  0.02838 *
## icv           0.54139    0.01375  39.367 < 2e-16 ***
## ---
## Signif. codes:  0 '***' 0.001 '**' 0.01 '*' 0.05 '.' 0.1 ' ' 1
##
## Approximate significance of smooth terms:
##           edf Ref.df      F p-value
## s(bl_age)      1.000  1.000 474.443 <2e-16 ***
## s(bl_age):sleep_z 2.000  2.000   1.558   0.211
## s(bl_age):time  3.861  3.861 184.606 <2e-16 ***
## s(sleep_z):time  1.000  1.000   0.459   0.498
## ---
## Signif. codes:  0 '***' 0.001 '**' 0.01 '*' 0.05 '.' 0.1 ' ' 1
##
## R-sq.(adj) =  0.507
## lmer.REML = 7464.5  Scale est. = 0.023634  n = 8144

```

Below are plots of a plot of  $s(\text{bl\_age})$ ,  $s(\text{bl\_age}):\text{sleep\_z}$ ,  $s(\text{bl\_age}):\text{time}$ , and  $s(\text{sleep\_z}):\text{time}$ . For  $s(\text{sleep\_z}):\text{time}$ , roughly, if we cannot fit a straight line through the confidence bands, there is evidence that the effect of time depends on sleep duration. It is correct that the confidence interval is zero at one point along the axis; this happens because we do not include the main effect.

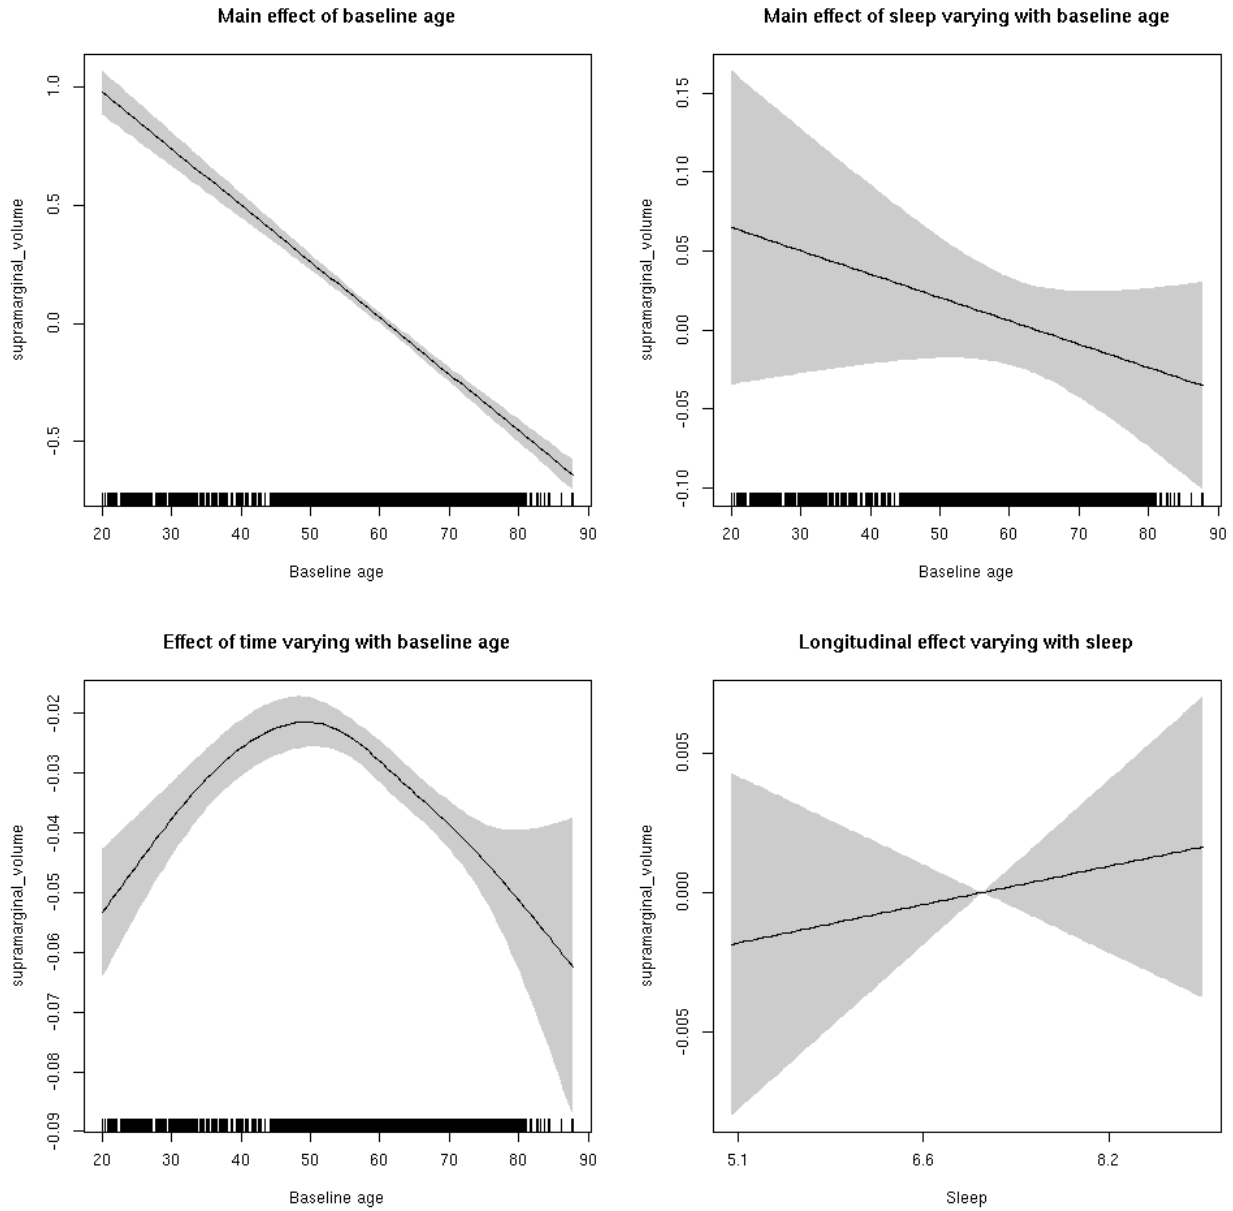

**Restricted to sleep  $\geq 5$  and  $\leq 9$  hours** Below is the row for `s(sleep_z):time` from the model output.

```
## s(sleep_z):time  1.000  1.000  0.366  0.545
```

Below are plots of a plot of `s(bl_age)`, `s(bl_age):sleep_z`, `s(bl_age):time`, and `s(sleep_z):time`. For `s(sleep_z):time`, roughly, if we cannot fit a straight line through the confidence bands, there is evidence that the effect of time depends on sleep duration. It is correct that the confidence interval is zero at one point along the axis; this happens because we do not include the main effect.



### transversetemporal\_area: Stratified by sex

**Female: Full data** Below is the row for `s(sleep_z):time` from the model output.

```
## s(sleep_z):time      1      1  5.423  0.0199 *
```

Below are plots of a plot of `s(bl_age)`, `s(bl_age):sleep_z`, `s(bl_age):time`, and `s(sleep_z):time`. For `s(sleep_z):time`, roughly, if we cannot fit a straight line through the confidence bands, there is evidence that the effect of time depends on sleep duration. It is correct that the confidence interval is zero at one point along the axis; this happens because we do not include the main effect.

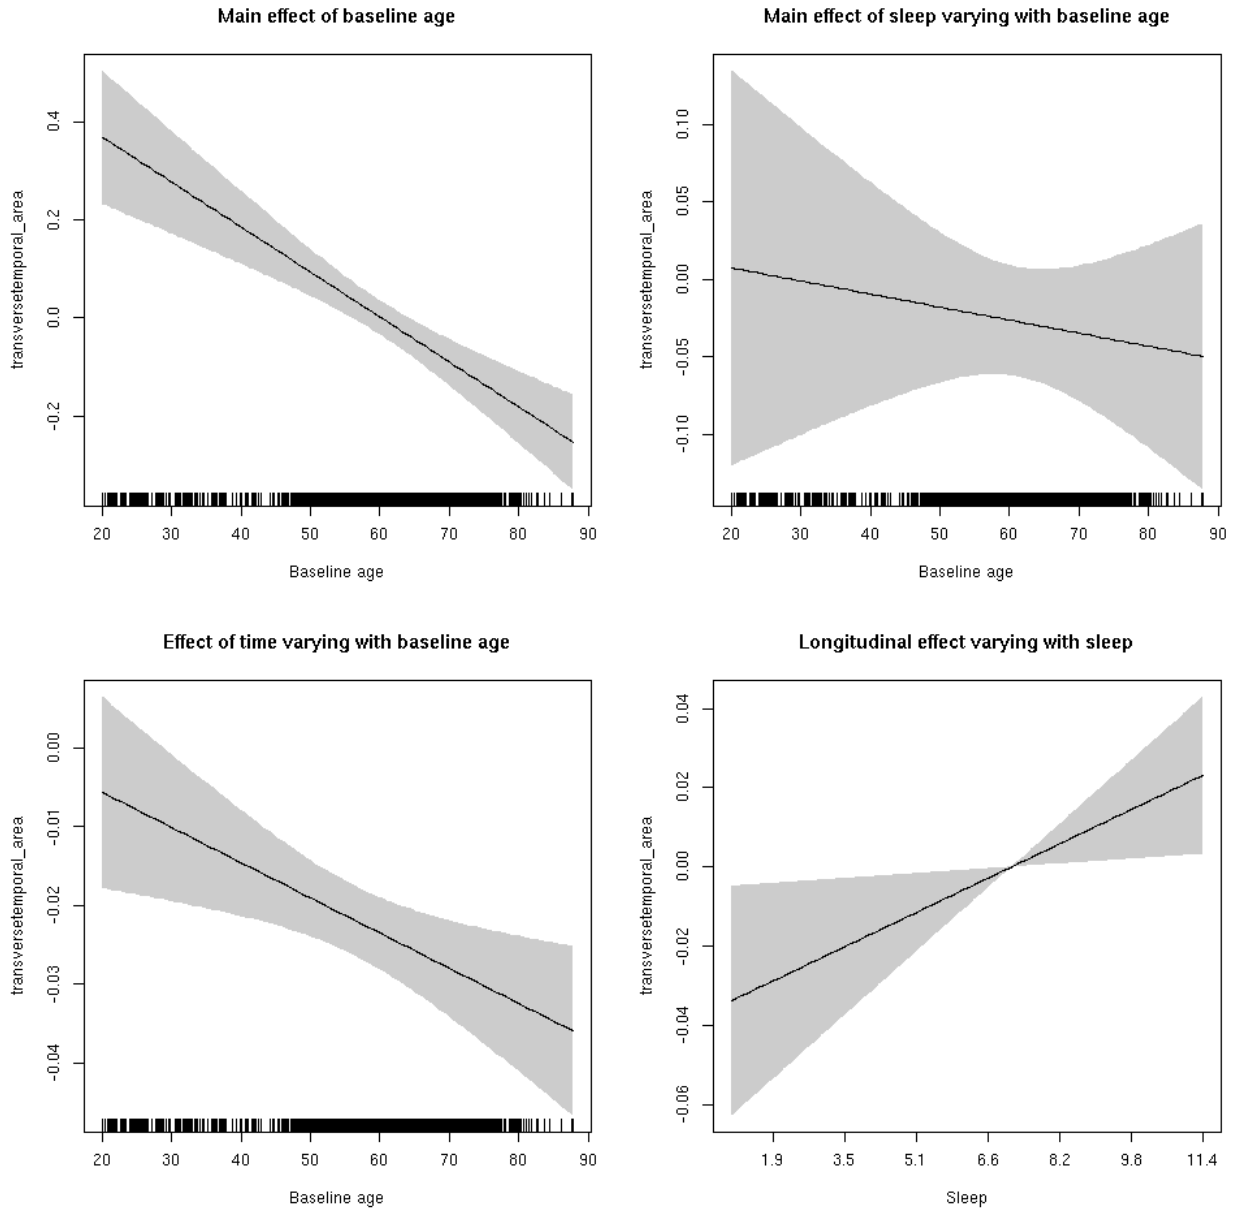

**Male: Full data** Below is the row for `s(sleep_z):time` from the model output.

```
## s(sleep_z):time  2.231  2.231  3.279   0.022 *
```

Below are plots of a plot of `s(bl_age)`, `s(bl_age):sleep_z`, `s(bl_age):time`, and `s(sleep_z):time`. For `s(sleep_z):time`, roughly, if we cannot fit a straight line through the confidence bands, there is evidence that the effect of time depends on sleep duration. It is correct that the confidence interval is zero at one point along the axis; this happens because we do not include the main effect.

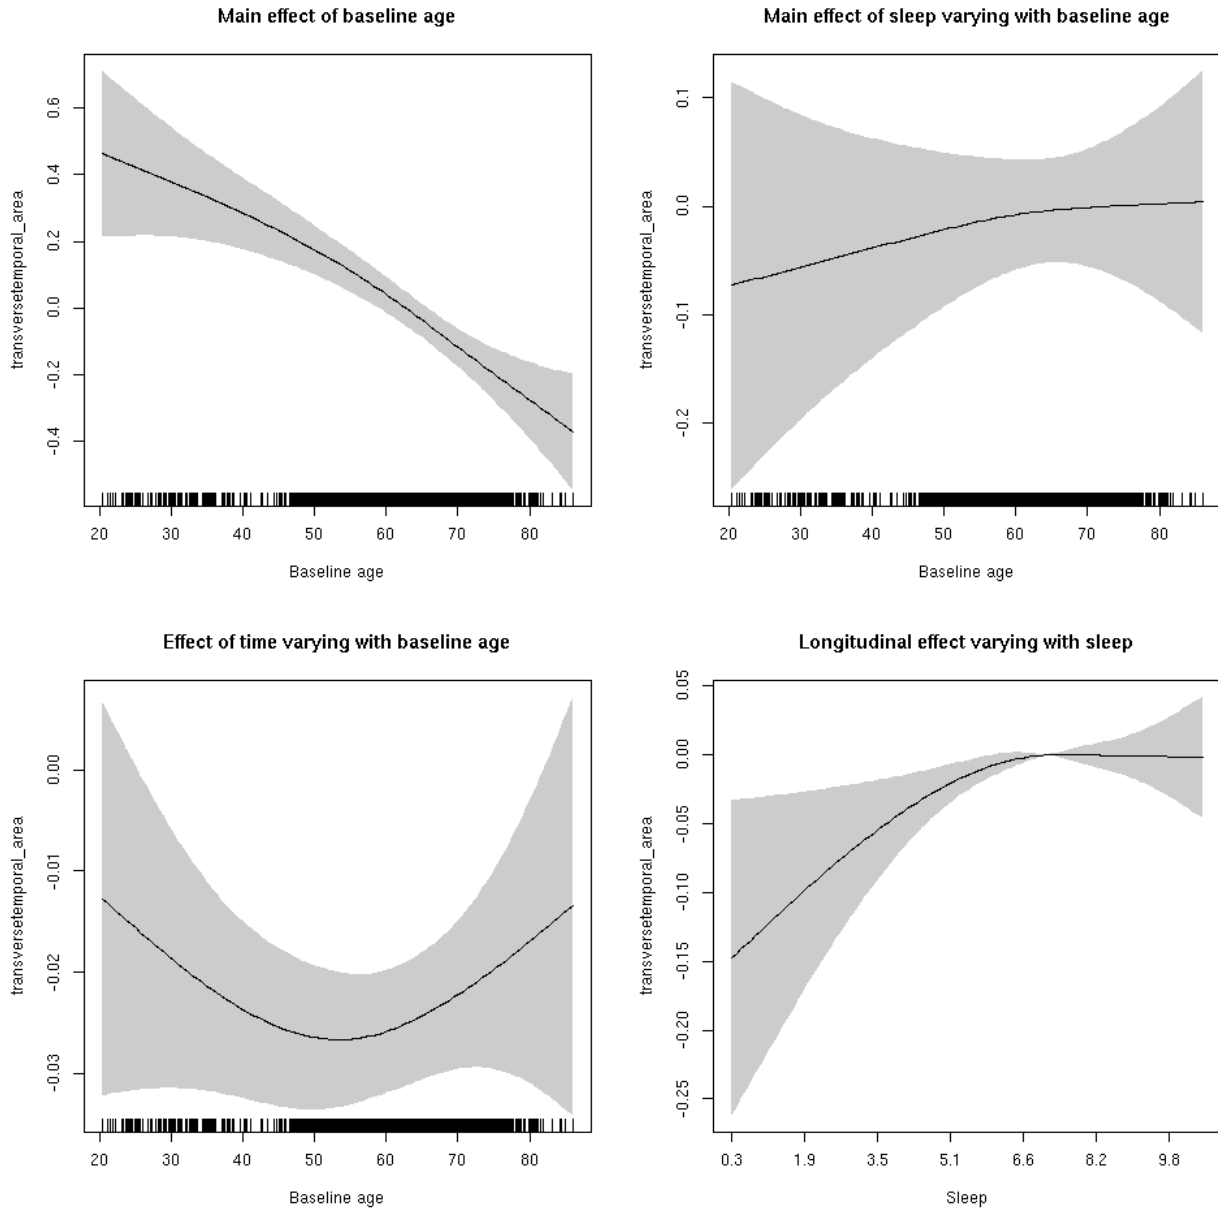

## transversetemporal\_area

**Full data** Below is the model output. The term `s(sleep_z):time` is probably what we care most about.

```
##
## Family: gaussian
## Link function: identity
##
## Formula:
## value ~ sex + site + icv + s(bl_age, k = 10, bs = "cr") + s(bl_age,
##   by = sleep_z, bs = "cr") + +s(bl_age, by = time, k = 5, bs = "cr") +
##   s(sleep_z, by = time, k = 5, bs = "cr", pc = 0)
## <environment: 0x5630035b1c00>
```

```

##
## Parametric coefficients:
##           Estimate Std. Error t value Pr(>|t|)
## (Intercept)  0.22267    0.06522   3.414 0.000643 ***
## sexmale      0.03791    0.03364   1.127 0.259792
## siteousAvanto -0.56594    0.07983  -7.089 1.46e-12 ***
## siteousPrisma -0.41755    0.17521  -2.383 0.017188 *
## siteousSkyra  -0.17776    0.07727  -2.300 0.021447 *
## siteUB       -0.35461    0.15091  -2.350 0.018810 *
## siteUCAM     -0.25649    0.08079  -3.175 0.001505 **
## siteUKB      -0.17758    0.06149  -2.888 0.003886 **
## siteUmU      -0.04399    0.09335  -0.471 0.637484
## icv          0.47755    0.01651  28.922 < 2e-16 ***
## ---
## Signif. codes:  0 '***' 0.001 '**' 0.01 '*' 0.05 '.' 0.1 ' ' 1
##
## Approximate significance of smooth terms:
##           edf Ref.df    F  p-value
## s(bl_age)      1.843  1.843 32.084 < 2e-16 ***
## s(bl_age):sleep_z 2.000  2.000  0.898 0.407349
## s(bl_age):time  2.000  2.000 65.937 < 2e-16 ***
## s(sleep_z):time  2.467  2.467  5.698 0.000997 ***
## ---
## Signif. codes:  0 '***' 0.001 '**' 0.01 '*' 0.05 '.' 0.1 ' ' 1
##
## R-sq.(adj) =  0.271
## lmer.REML = 11214  Scale est. = 0.04064  n = 8175

```

Below are plots of a plot of `s(bl_age)`, `s(bl_age):sleep_z`, `s(bl_age):time`, and `s(sleep_z):time`. For `s(sleep_z):time`, roughly, if we cannot fit a straight line through the confidence bands, there is evidence that the effect of time depends on sleep duration. It is correct the that confidence interval is zero at one point along the axis; this happens because we do not include the main effect.



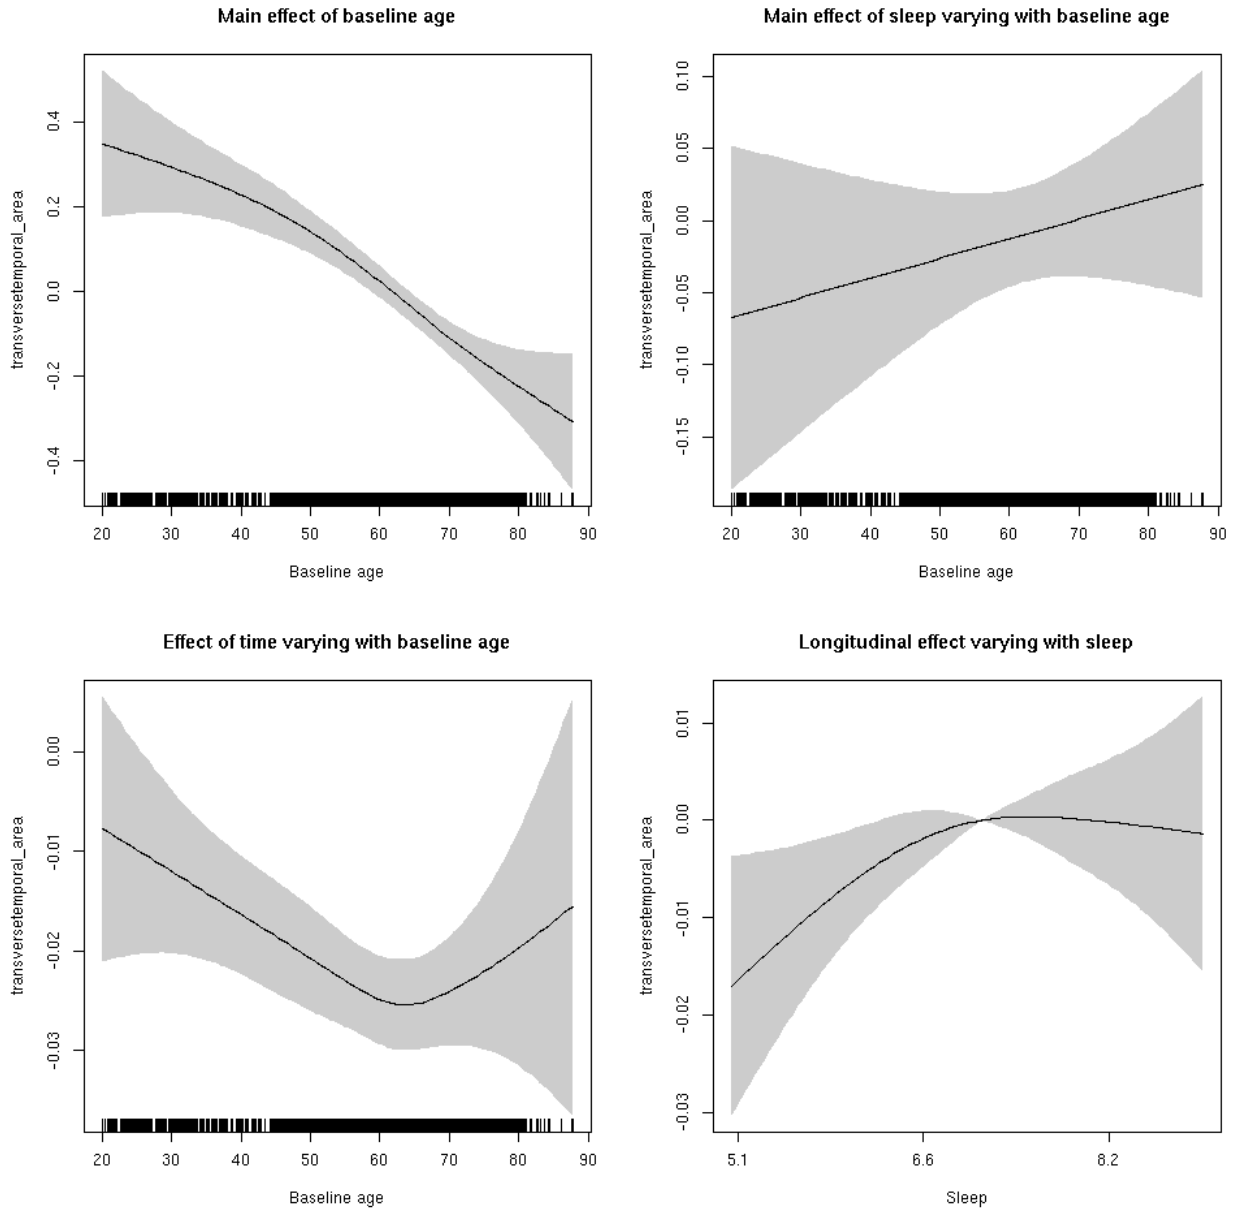

**Restricted to sleep  $\geq 5$  and  $\leq 9$  hours** Below is the row for `s(sleep_z):time` from the model output.

```
## s(sleep_z):time  1.922  1.922  3.738  0.0372 *
```

Below are plots of a plot of `s(bl_age)`, `s(bl_age):sleep_z`, `s(bl_age):time`, and `s(sleep_z):time`. For `s(sleep_z):time`, roughly, if we cannot fit a straight line through the confidence bands, there is evidence that the effect of time depends on sleep duration. It is correct that the confidence interval is zero at one point along the axis; this happens because we do not include the main effect.

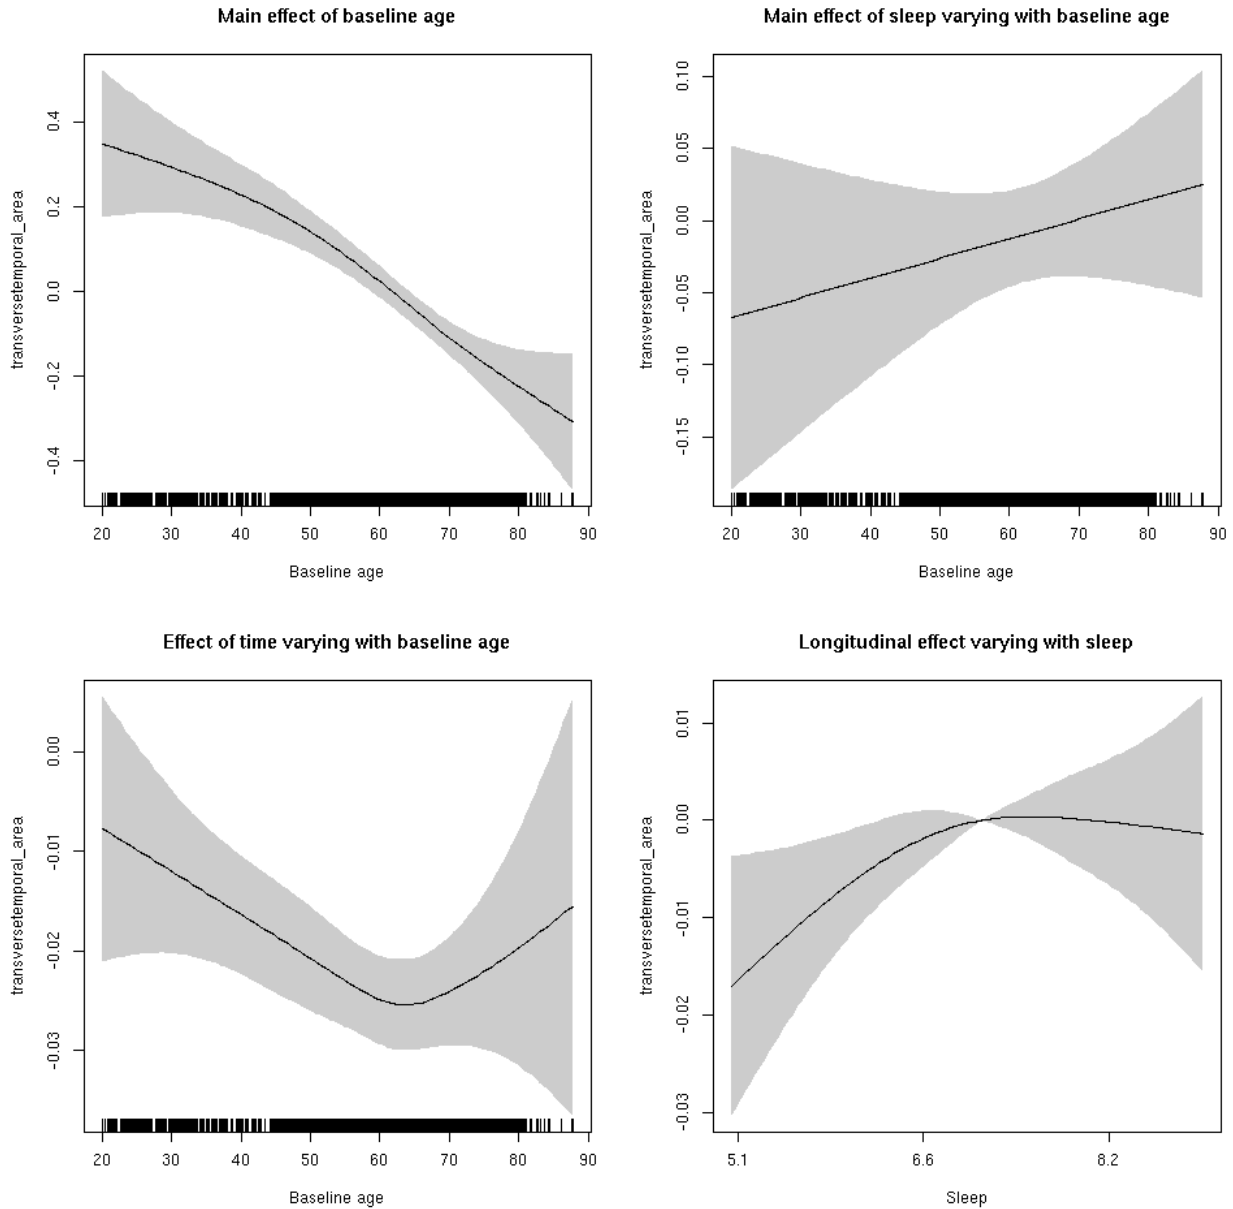

### transversetemporal\_thickness: Stratified by sex

**Female: Full data** Below is the row for `s(sleep_z):time` from the model output.

```
## s(sleep_z):time  1.000  1.000  0.105  0.7462
```

Below are plots of a plot of `s(bl_age)`, `s(bl_age):sleep_z`, `s(bl_age):time`, and `s(sleep_z):time`. For `s(sleep_z):time`, roughly, if we cannot fit a straight line through the confidence bands, there is evidence that the effect of time depends on sleep duration. It is correct that the confidence interval is zero at one point along the axis; this happens because we do not include the main effect.

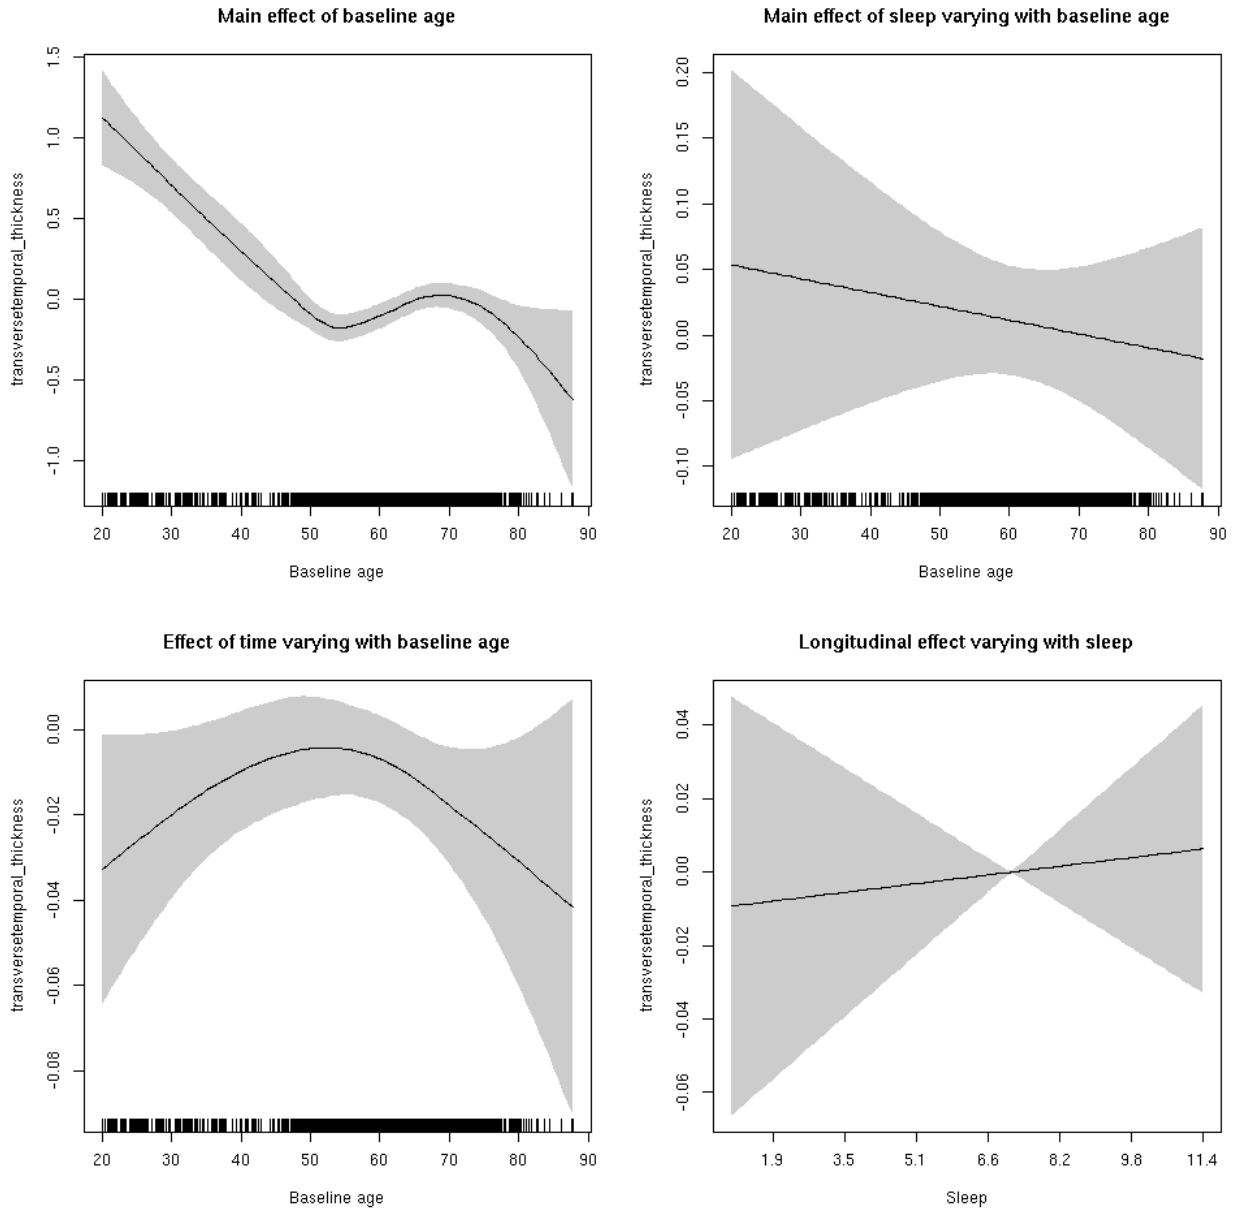

**Male: Full data** Below is the row for `s(sleep_z):time` from the model output.

```
## s(sleep_z):time  1.000  1.000  0.523  0.470
```

Below are plots of a plot of `s(bl_age)`, `s(bl_age):sleep_z`, `s(bl_age):time`, and `s(sleep_z):time`. For `s(sleep_z):time`, roughly, if we cannot fit a straight line through the confidence bands, there is evidence that the effect of time depends on sleep duration. It is correct that the confidence interval is zero at one point along the axis; this happens because we do not include the main effect.

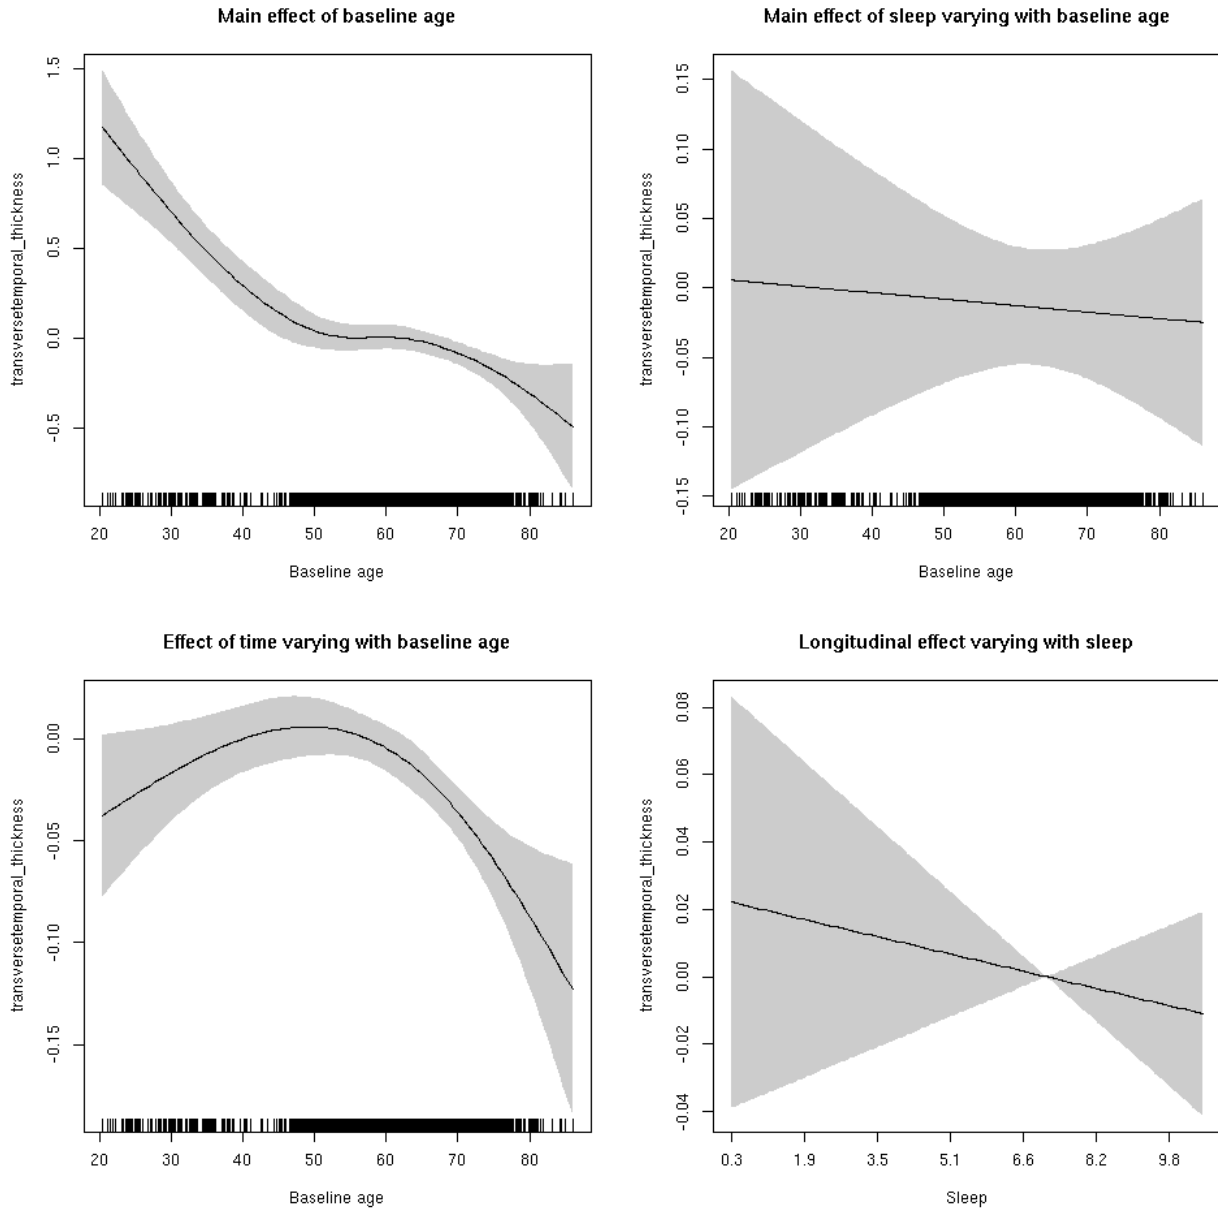

## transversetemporal\_thickness

**Full data** Below is the model output. The term `s(sleep_z):time` is probably what we care most about.

```
##
## Family: gaussian
## Link function: identity
##
## Formula:
## value ~ sex + site + s(bl_age, k = 10, bs = "cr") + s(bl_age,
##   by = sleep_z, bs = "cr") + +s(bl_age, by = time, k = 5, bs = "cr") +
##   s(sleep_z, by = time, k = 5, bs = "cr", pc = 0)
## <environment: 0x5630035d10d8>
```

```

##
## Parametric coefficients:
##           Estimate Std. Error t value Pr(>|t|)
## (Intercept) -0.87845    0.05588 -15.720 < 2e-16 ***
## sexmale     -0.02949    0.02794  -1.056 0.291214
## siteousAvanto -0.04714    0.07396  -0.637 0.523887
## siteousPrisma  0.44534    0.29850   1.492 0.135754
## siteousSkyra   0.51062    0.07394   6.906 5.37e-12 ***
## siteUB        0.48881    0.14830   3.296 0.000984 ***
## siteUCAM      0.32313    0.07736   4.177 2.98e-05 ***
## siteUKB       1.00056    0.05679  17.619 < 2e-16 ***
## siteUmU       0.29509    0.09199   3.208 0.001342 **
## ---
## Signif. codes:  0 '***' 0.001 '**' 0.01 '*' 0.05 '.' 0.1 ' ' 1
##
## Approximate significance of smooth terms:
##           edf Ref.df      F p-value
## s(bl_age)      5.107  5.107 36.588 <2e-16 ***
## s(bl_age):sleep_z 2.000  2.000  0.438  0.645
## s(bl_age):time  3.635  3.635 13.006 <2e-16 ***
## s(sleep_z):time  1.000  1.000  0.041  0.839
## ---
## Signif. codes:  0 '***' 0.001 '**' 0.01 '*' 0.05 '.' 0.1 ' ' 1
##
## R-sq.(adj) =  0.153
## lmer.REML = 16811  Scale est. = 0.15041  n = 8180

```

Below are plots of a plot of `s(bl_age)`, `s(bl_age):sleep_z`, `s(bl_age):time`, and `s(sleep_z):time`. For `s(sleep_z):time`, roughly, if we cannot fit a straight line through the confidence bands, there is evidence that the effect of time depends on sleep duration. It is correct that the confidence interval is zero at one point along the axis; this happens because we do not include the main effect.

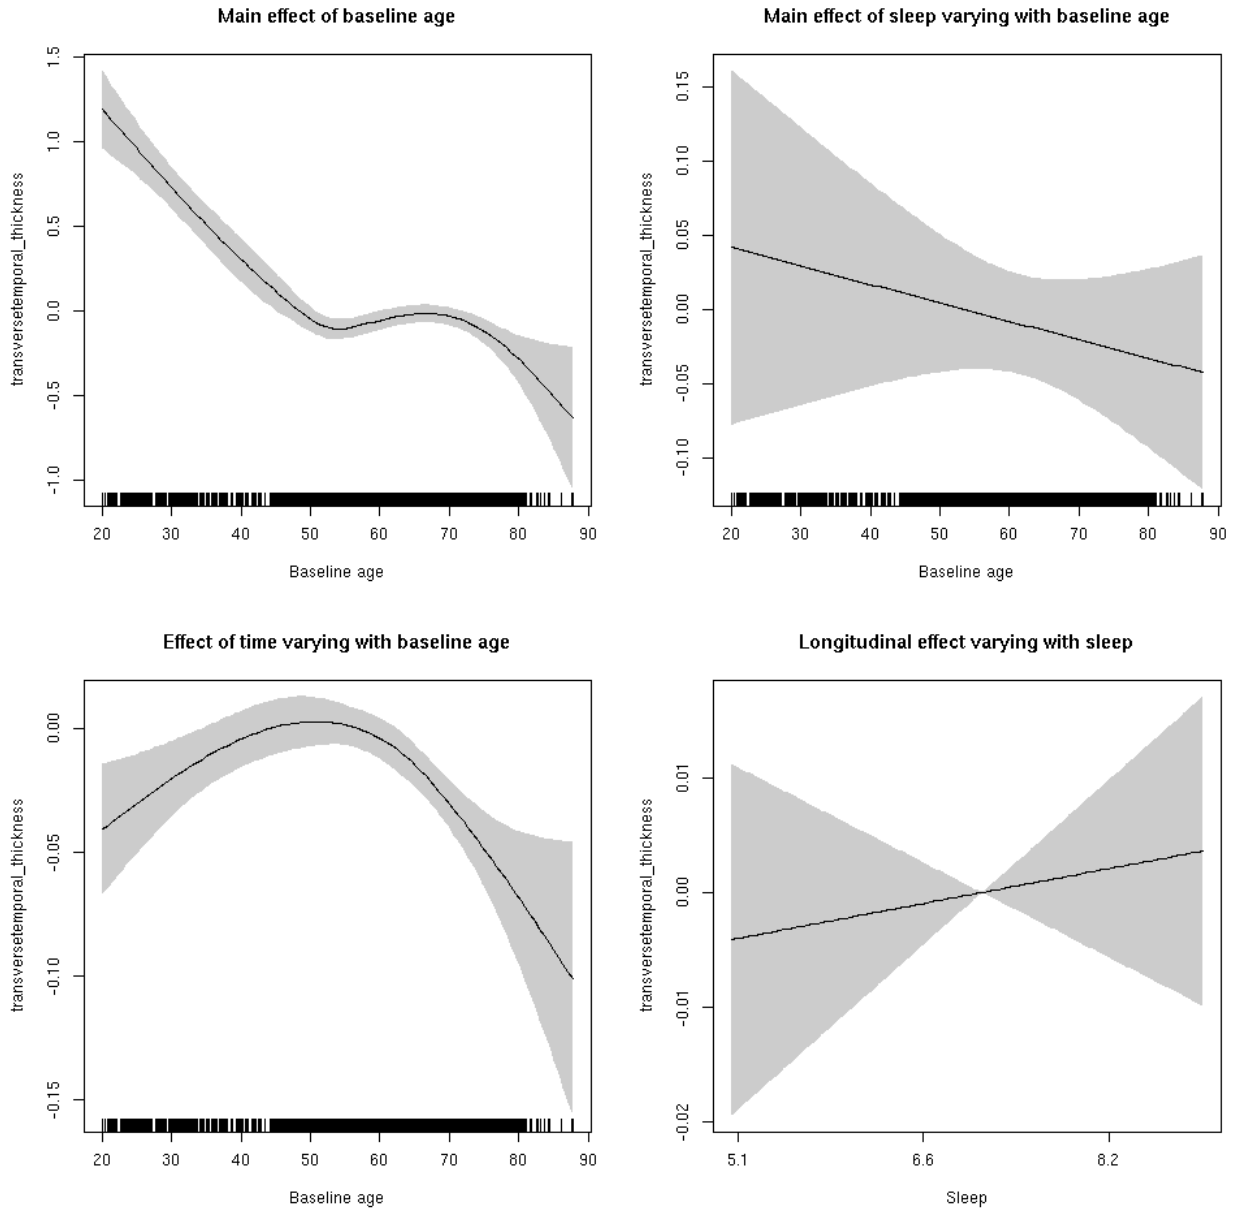

**Restricted to sleep  $\geq 5$  and  $\leq 9$  hours** Below is the row for `s(sleep_z):time` from the model output.

```
## s(sleep_z):time  1.000  1.000  0.287  0.592
```

Below are plots of a plot of `s(bl_age)`, `s(bl_age):sleep_z`, `s(bl_age):time`, and `s(sleep_z):time`. For `s(sleep_z):time`, roughly, if we cannot fit a straight line through the confidence bands, there is evidence that the effect of time depends on sleep duration. It is correct that the confidence interval is zero at one point along the axis; this happens because we do not include the main effect.

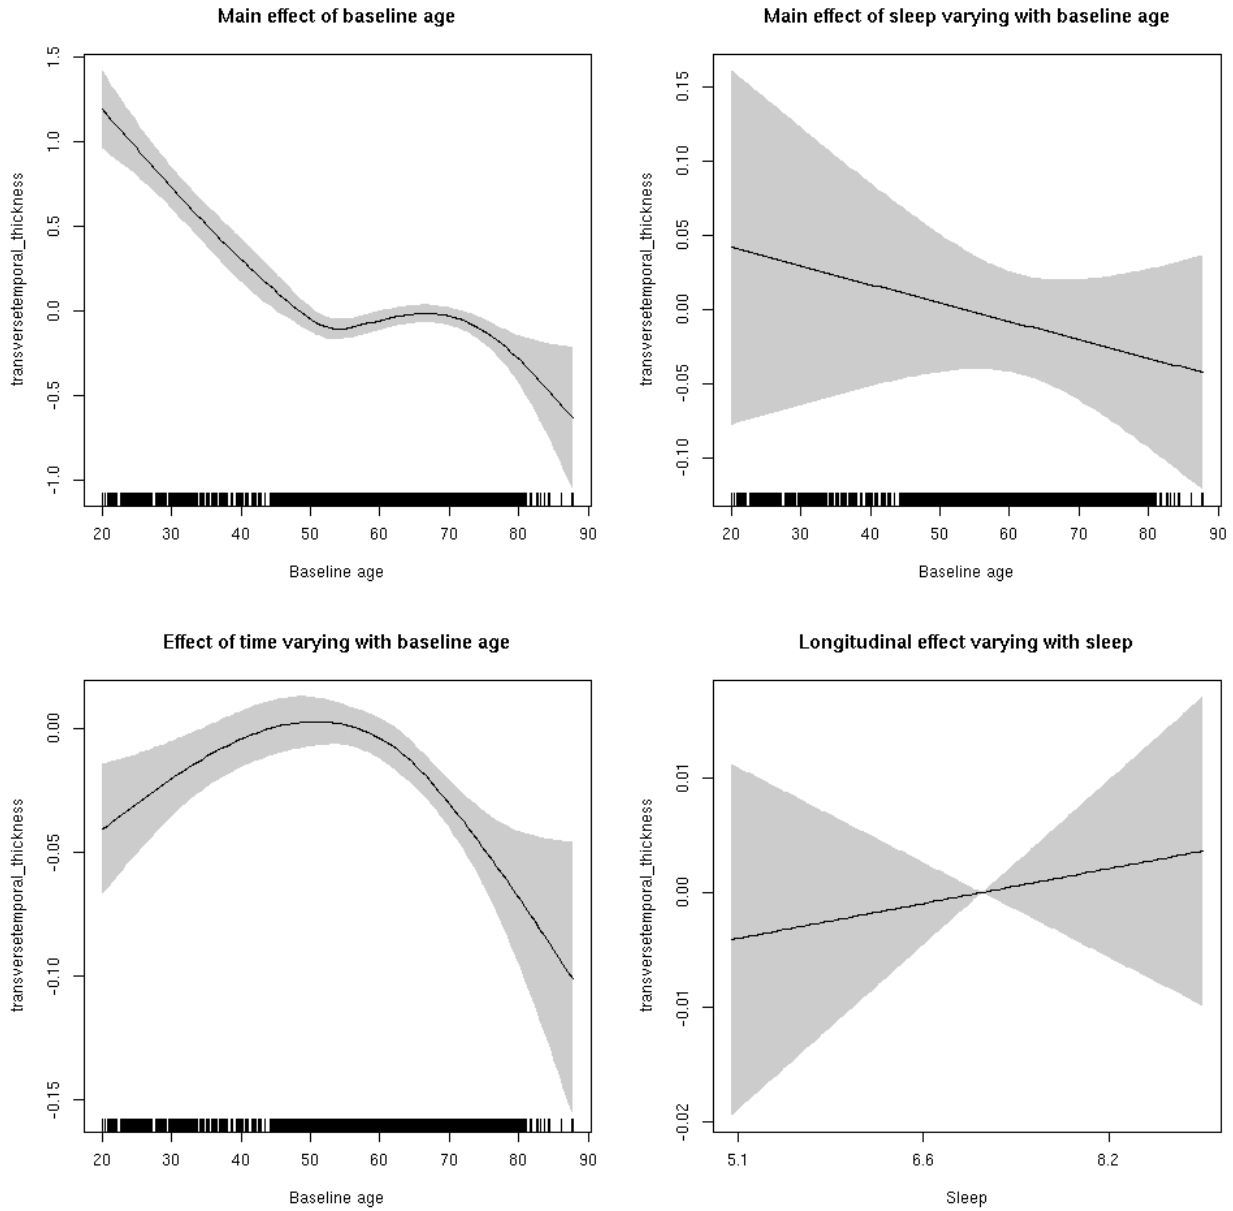

## transversetemporal\_volume: Stratified by sex

**Female: Full data** Below is the row for `s(sleep_z):time` from the model output.

```
## s(sleep_z):time  1.000  1.000  1.066  0.302
```

Below are plots of a plot of `s(bl_age)`, `s(bl_age):sleep_z`, `s(bl_age):time`, and `s(sleep_z):time`. For `s(sleep_z):time`, roughly, if we cannot fit a straight line through the confidence bands, there is evidence that the effect of time depends on sleep duration. It is correct that the confidence interval is zero at one point along the axis; this happens because we do not include the main effect.

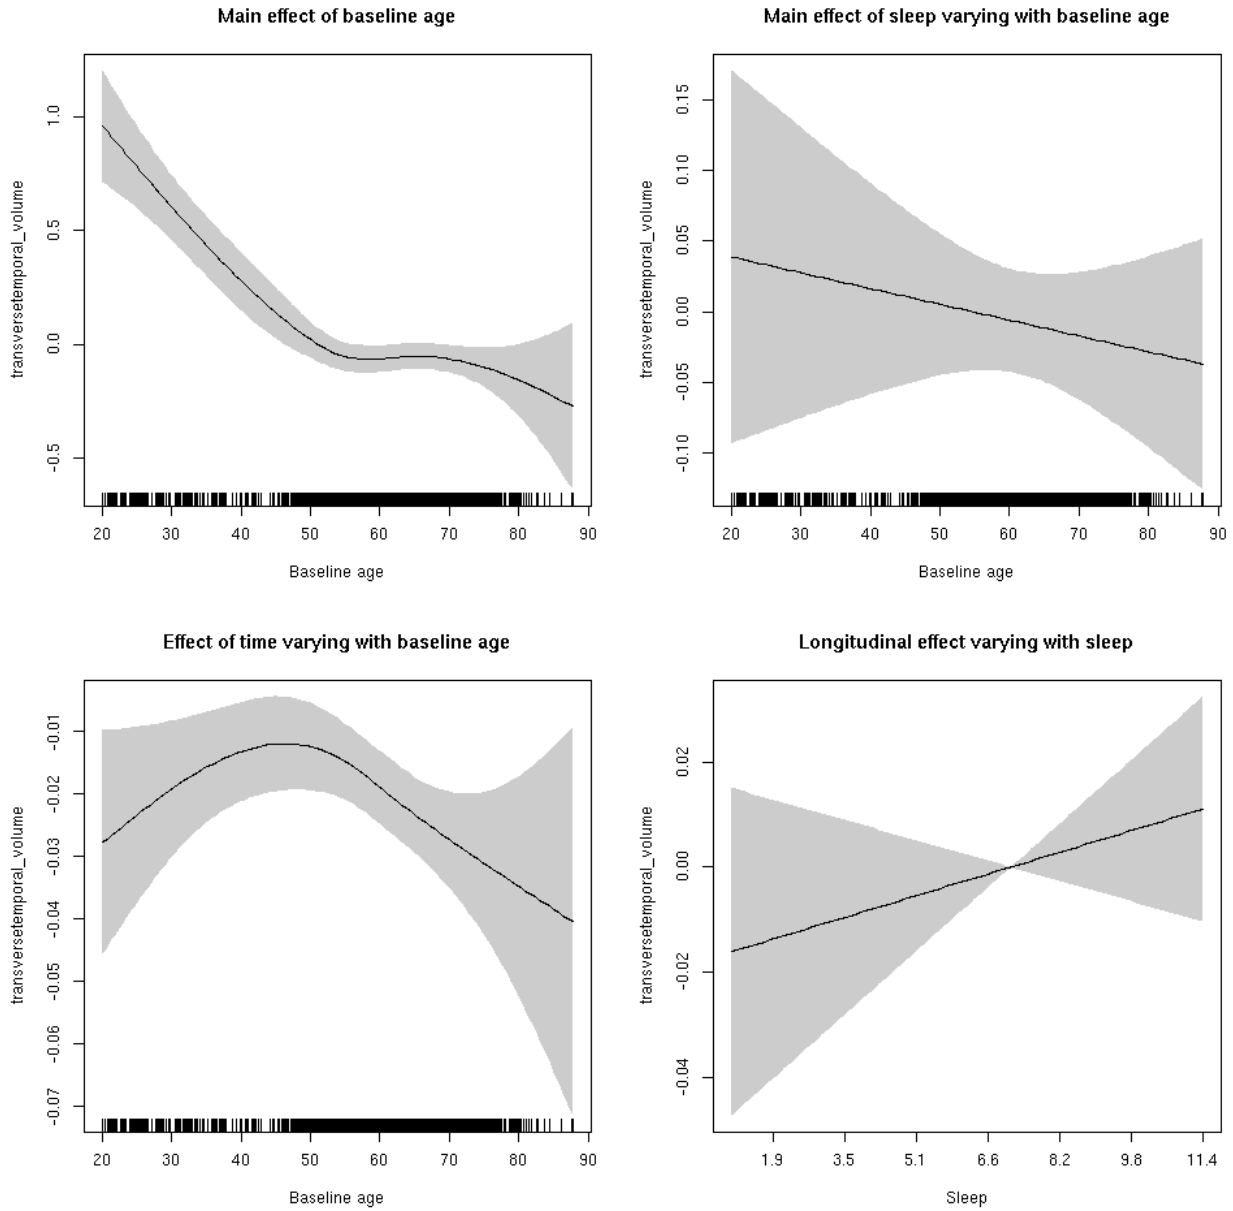

**Male: Full data** Below is the row for `s(sleep_z):time` from the model output.

```
## s(sleep_z):time  1.000  1.000  0.029  0.865
```

Below are plots of a plot of `s(bl_age)`, `s(bl_age):sleep_z`, `s(bl_age):time`, and `s(sleep_z):time`. For `s(sleep_z):time`, roughly, if we cannot fit a straight line through the confidence bands, there is evidence that the effect of time depends on sleep duration. It is correct that the confidence interval is zero at one point along the axis; this happens because we do not include the main effect.



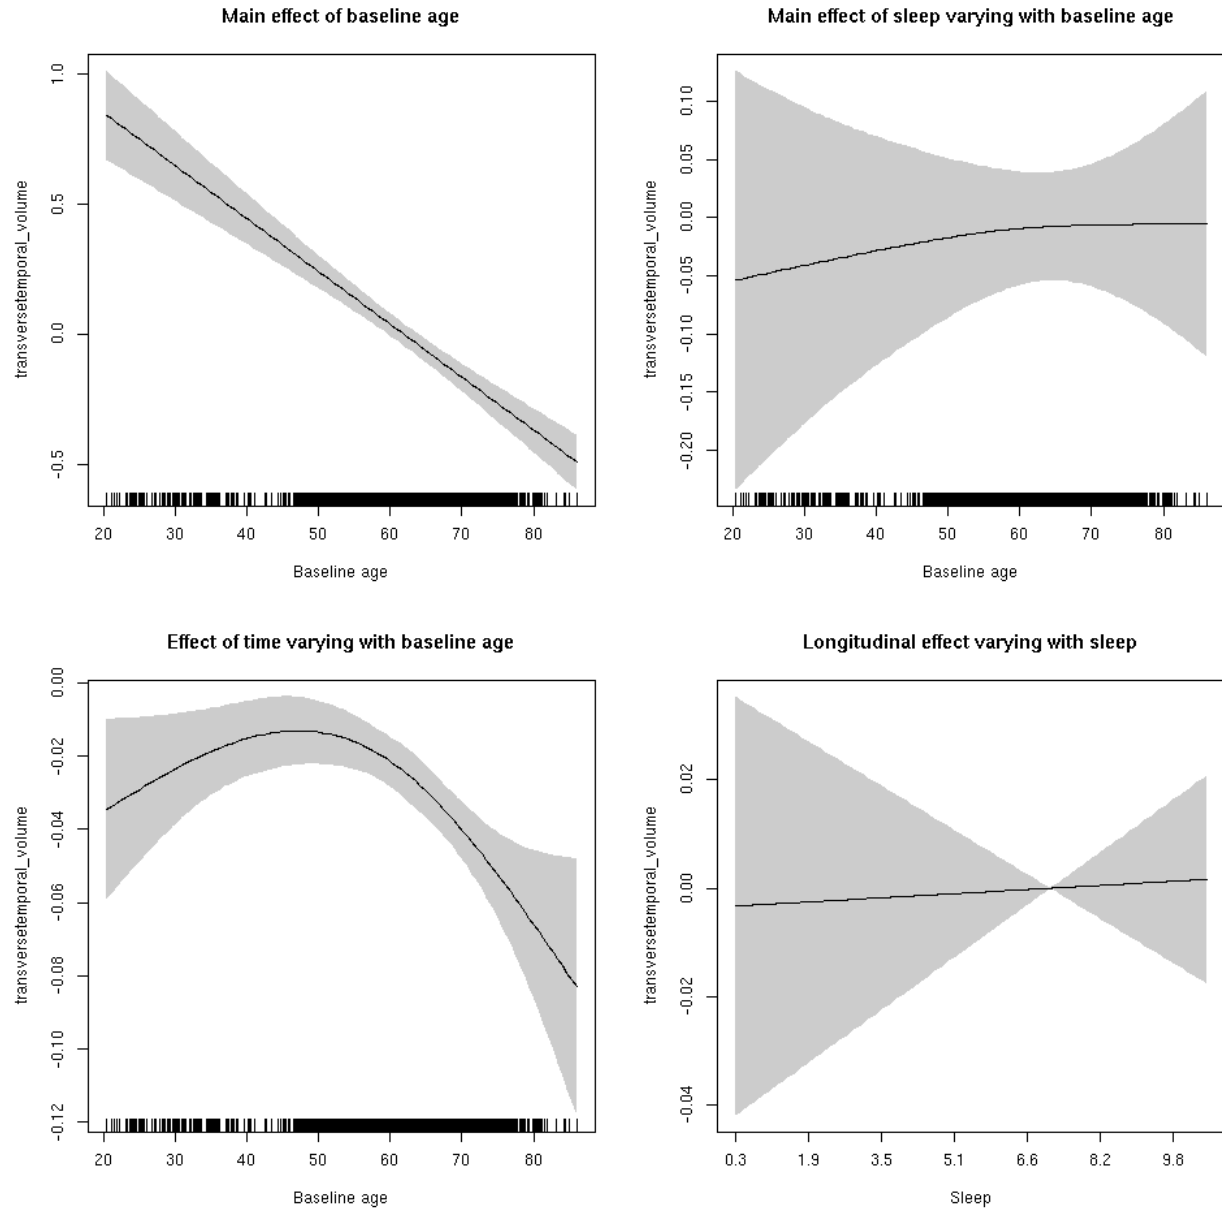

## transversetemporal\_volume

**Full data** Below is the model output. The term `s(sleep_z):time` is probably what we care most about.

```
##
## Family: gaussian
## Link function: identity
##
## Formula:
## value ~ sex + site + icv + s(bl_age, k = 10, bs = "cr") + s(bl_age,
##   by = sleep_z, bs = "cr") + +s(bl_age, by = time, k = 5, bs = "cr") +
##   s(sleep_z, by = time, k = 5, bs = "cr", pc = 0)
## <environment: 0x5630035ad538>
```

```

##
## Parametric coefficients:
##           Estimate Std. Error t value Pr(>|t|)
## (Intercept) -0.22865    0.06570  -3.480 0.000504 ***
## sexmale      0.05148    0.03372   1.527 0.126899
## siteousAvanto -0.63418    0.08018  -7.910 2.92e-15 ***
## siteousPrisma -0.20768    0.19094  -1.088 0.276768
## siteousSkyra  0.08348    0.07762   1.076 0.282176
## siteUB       -0.06620    0.15101  -0.438 0.661134
## siteUCAM     -0.10443    0.08160  -1.280 0.200673
## siteUKB      0.31928    0.06244   5.114 3.23e-07 ***
## siteUmU      0.08869    0.09365   0.947 0.343653
## icv          0.40486    0.01662  24.357 < 2e-16 ***
## ---
## Signif. codes:  0 '***' 0.001 '**' 0.01 '*' 0.05 '.' 0.1 ' ' 1
##
## Approximate significance of smooth terms:
##           edf Ref.df    F p-value
## s(bl_age)      3.586  3.586 49.773 <2e-16 ***
## s(bl_age):sleep_z 2.000  2.000  0.593  0.553
## s(bl_age):time  3.578  3.578 59.046 <2e-16 ***
## s(sleep_z):time  1.000  1.000  0.721  0.396
## ---
## Signif. codes:  0 '***' 0.001 '**' 0.01 '*' 0.05 '.' 0.1 ' ' 1
##
## R-sq.(adj) =  0.269
## lmer.REML = 12147  Scale est. = 0.050593  n = 8174

```

Below are plots of a plot of  $s(\text{bl\_age})$ ,  $s(\text{bl\_age}):\text{sleep\_z}$ ,  $s(\text{bl\_age}):\text{time}$ , and  $s(\text{sleep\_z}):\text{time}$ . For  $s(\text{sleep\_z}):\text{time}$ , roughly, if we cannot fit a straight line through the confidence bands, there is evidence that the effect of time depends on sleep duration. It is correct the that confidence interval is zero at one point along the axis; this happens because we do not include the main effect.

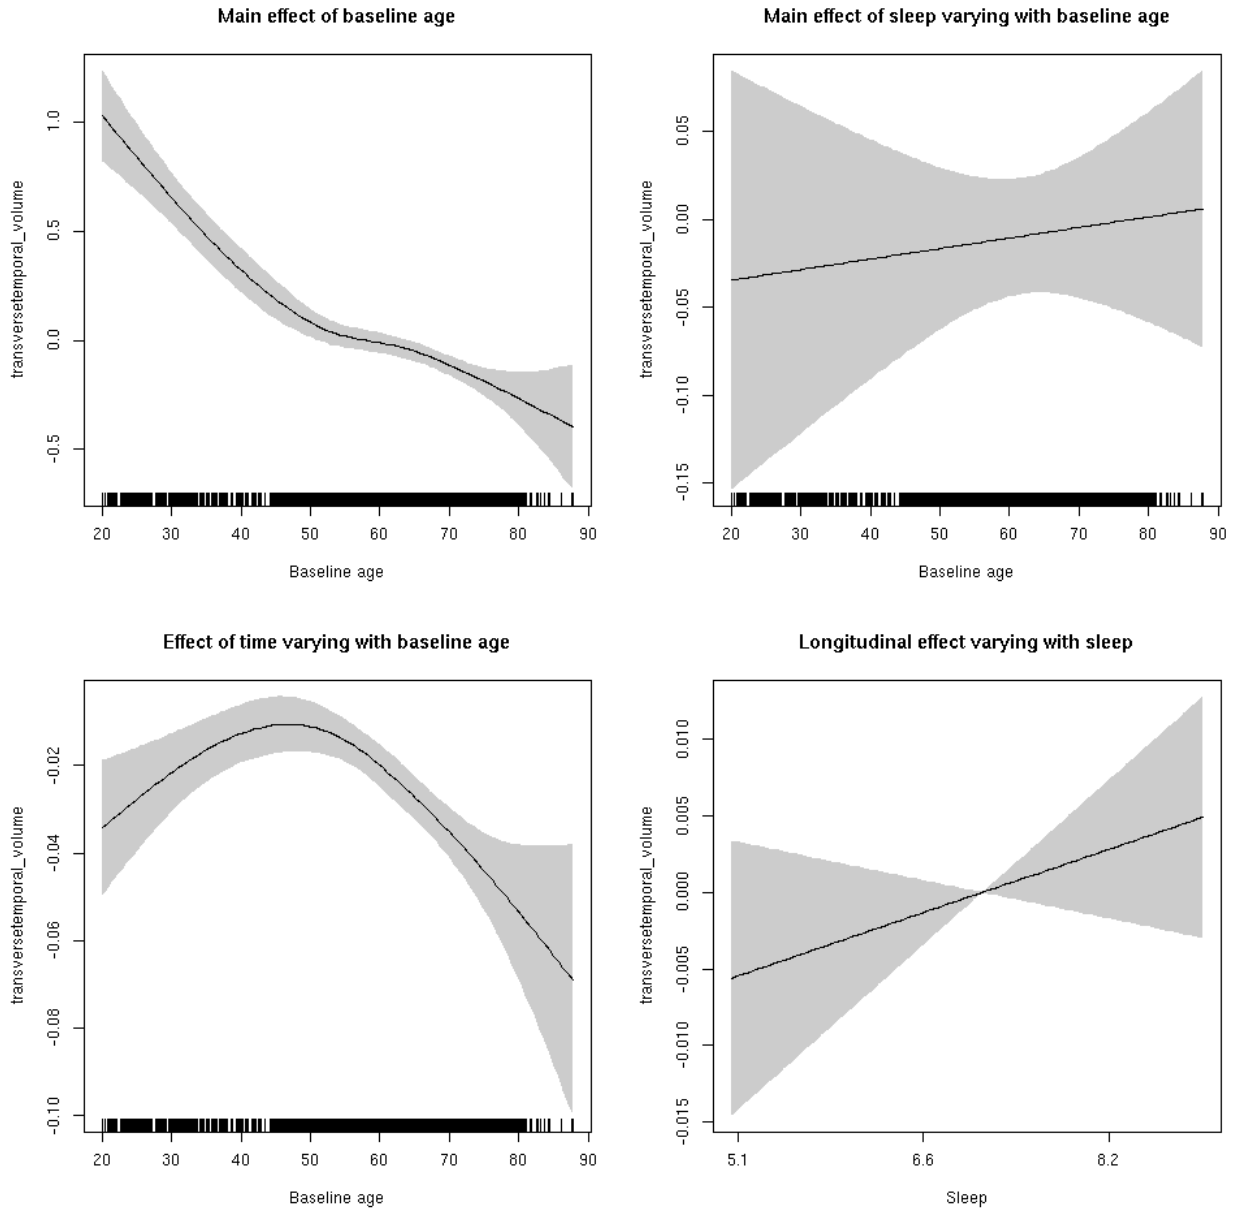

**Restricted to sleep  $\geq 5$  and  $\leq 9$  hours** Below is the row for `s(sleep_z):time` from the model output.

```
## s(sleep_z):time  1.000  1.000  1.549  0.213
```

Below are plots of a plot of `s(bl_age)`, `s(bl_age):sleep_z`, `s(bl_age):time`, and `s(sleep_z):time`. For `s(sleep_z):time`, roughly, if we cannot fit a straight line through the confidence bands, there is evidence that the effect of time depends on sleep duration. It is correct that the confidence interval is zero at one point along the axis; this happens because we do not include the main effect.

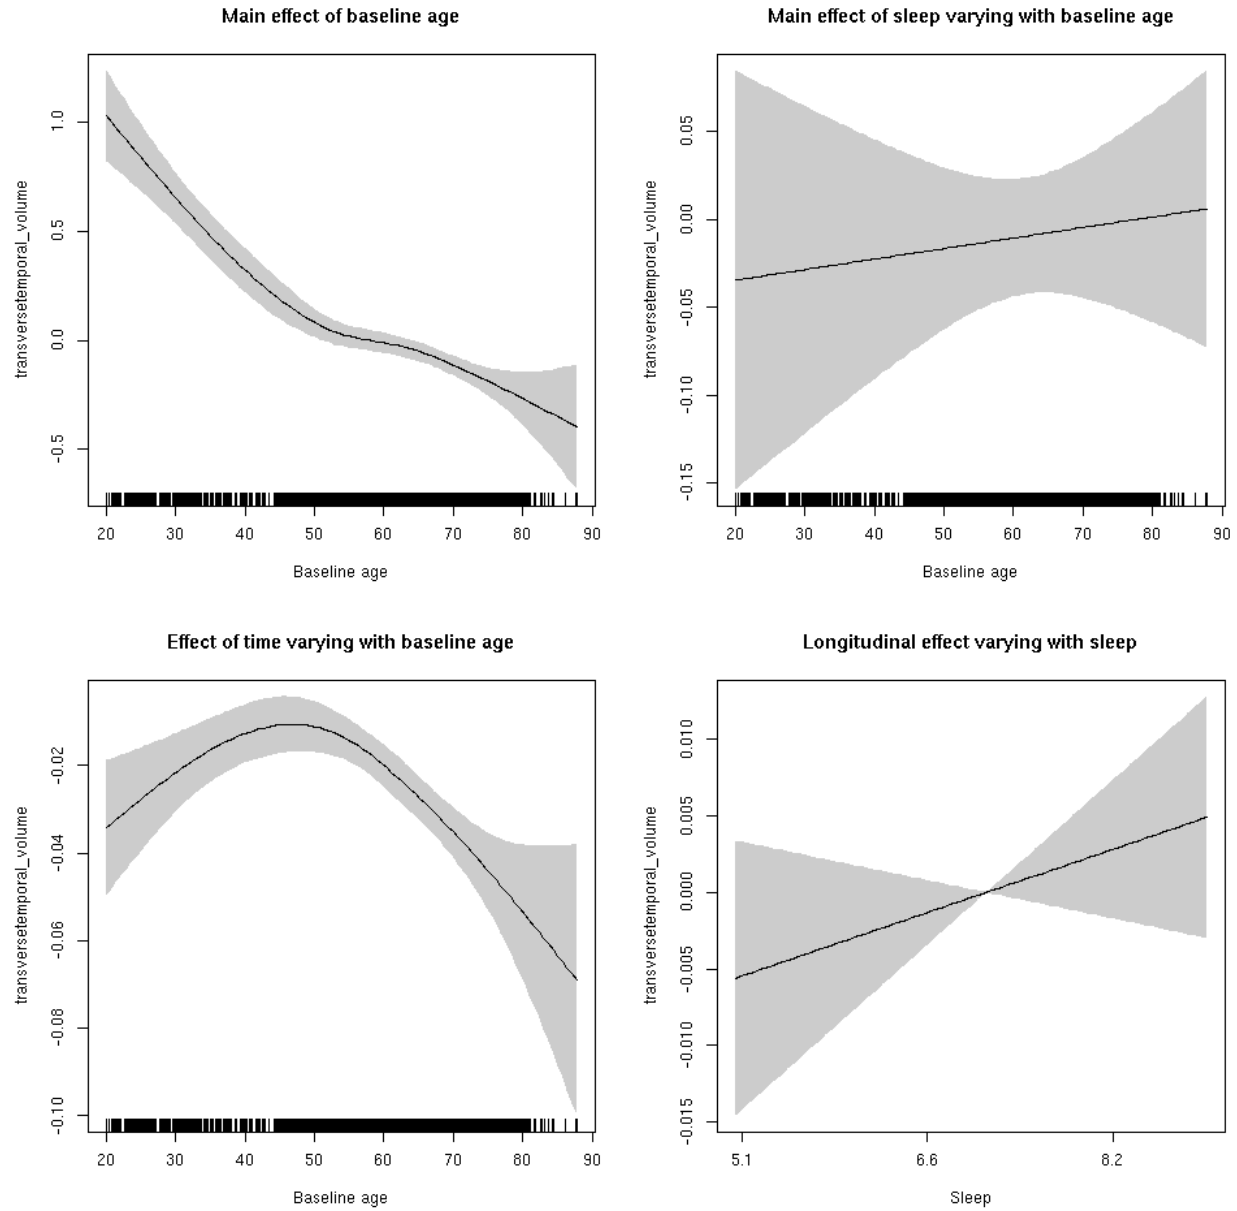

## P-values corrected for multiple testing

Below is a table showing the p-values for `s(sleep_z, by = time)` adjusted for multiple testing using the Benjamini-Hochberg procedure for the main models not controlling for SES, BMI, or depression, and using only subjects with two or more observations.

| region                       | type      | pval   | adjusted_pval |
|------------------------------|-----------|--------|---------------|
| bankssts_area                | Full data | 0.0142 | 0.6476        |
| caudalanteriorcingulate_area | Full data | 0.9621 | 0.9907        |
| caudalmiddlefrontal_area     | Full data | 0.2890 | 0.9805        |
| cuneus_area                  | Full data | 0.9557 | 0.9907        |
| entorhinal_area              | Full data | 0.7084 | 0.9896        |

| region                        | type                                            | pval   | adjusted_pval |
|-------------------------------|-------------------------------------------------|--------|---------------|
| frontalpole_area              | Full data                                       | 0.8474 | 0.9896        |
| fusiform_area                 | Full data                                       | 0.3215 | 0.9805        |
| inferiorparietal_area         | Full data                                       | 0.4033 | 0.9885        |
| inferiortemporal_area         | Full data                                       | 0.1474 | 0.8769        |
| insula_area                   | Full data                                       | 0.2785 | 0.9805        |
| isthmuscingulate_area         | Full data                                       | 0.1709 | 0.9315        |
| lateraloccipital_area         | Full data                                       | 0.7515 | 0.9896        |
| lateralorbitofrontal_area     | Full data                                       | 0.5970 | 0.9896        |
| lingual_area                  | Full data                                       | 0.5260 | 0.9896        |
| medialorbitofrontal_area      | Full data                                       | 0.3181 | 0.9805        |
| middletemporal_area           | Full data                                       | 0.1051 | 0.8416        |
| paracentral_area              | Full data                                       | 0.7676 | 0.9896        |
| parahippocampal_area          | Full data                                       | 0.5461 | 0.9896        |
| parsopercularis_area          | Full data                                       | 0.1353 | 0.8581        |
| parsorbitalis_area            | Full data                                       | 0.5659 | 0.9896        |
| parstriangularis_area         | Full data                                       | 0.8927 | 0.9896        |
| pericalcarine_area            | Full data                                       | 0.0880 | 0.8296        |
| postcentral_area              | Full data                                       | 0.1672 | 0.9197        |
| posteriorcingulate_area       | Full data                                       | 0.6817 | 0.9896        |
| precentral_area               | Full data                                       | 0.2507 | 0.9805        |
| precuneus_area                | Full data                                       | 0.5567 | 0.9896        |
| rostralanteriorcingulate_area | Full data                                       | 0.7168 | 0.9896        |
| rostralmiddlefrontal_area     | Full data                                       | 0.6356 | 0.9896        |
| superiorfrontal_area          | Full data                                       | 0.9209 | 0.9896        |
| superiorparietal_area         | Full data                                       | 0.9414 | 0.9896        |
| superiortemporal_area         | Full data                                       | 0.9568 | 0.9907        |
| supramarginal_area            | Full data                                       | 0.2838 | 0.9805        |
| transversetemporal_area       | Full data                                       | 0.0010 | 0.2960        |
| bankssts_area                 | Restricted to sleep $\geq 5$ and $\leq 9$ hours | 0.0677 | 0.8080        |
| caudalanteriorcingulate_area  | Restricted to sleep $\geq 5$ and $\leq 9$ hours | 0.7225 | 0.9896        |
| caudalmiddlefrontal_area      | Restricted to sleep $\geq 5$ and $\leq 9$ hours | 0.7788 | 0.9896        |
| cuneus_area                   | Restricted to sleep $\geq 5$ and $\leq 9$ hours | 0.8673 | 0.9896        |
| entorhinal_area               | Restricted to sleep $\geq 5$ and $\leq 9$ hours | 0.9897 | 0.9947        |
| frontalpole_area              | Restricted to sleep $\geq 5$ and $\leq 9$ hours | 0.6758 | 0.9896        |
| fusiform_area                 | Restricted to sleep $\geq 5$ and $\leq 9$ hours | 0.4240 | 0.9885        |
| inferiorparietal_area         | Restricted to sleep $\geq 5$ and $\leq 9$ hours | 0.1985 | 0.9805        |
| inferiortemporal_area         | Restricted to sleep $\geq 5$ and $\leq 9$ hours | 0.4215 | 0.9885        |
| insula_area                   | Restricted to sleep $\geq 5$ and $\leq 9$ hours | 0.1243 | 0.8581        |
| isthmuscingulate_area         | Restricted to sleep $\geq 5$ and $\leq 9$ hours | 0.0533 | 0.7420        |
| lateraloccipital_area         | Restricted to sleep $\geq 5$ and $\leq 9$ hours | 0.5367 | 0.9896        |
| lateralorbitofrontal_area     | Restricted to sleep $\geq 5$ and $\leq 9$ hours | 0.7750 | 0.9896        |
| lingual_area                  | Restricted to sleep $\geq 5$ and $\leq 9$ hours | 0.6341 | 0.9896        |
| medialorbitofrontal_area      | Restricted to sleep $\geq 5$ and $\leq 9$ hours | 0.4597 | 0.9885        |
| middletemporal_area           | Restricted to sleep $\geq 5$ and $\leq 9$ hours | 0.1372 | 0.8581        |
| paracentral_area              | Restricted to sleep $\geq 5$ and $\leq 9$ hours | 0.6644 | 0.9896        |
| parahippocampal_area          | Restricted to sleep $\geq 5$ and $\leq 9$ hours | 0.6167 | 0.9896        |
| parsopercularis_area          | Restricted to sleep $\geq 5$ and $\leq 9$ hours | 0.6814 | 0.9896        |
| parsorbitalis_area            | Restricted to sleep $\geq 5$ and $\leq 9$ hours | 0.8884 | 0.9896        |
| parstriangularis_area         | Restricted to sleep $\geq 5$ and $\leq 9$ hours | 0.9052 | 0.9896        |
| pericalcarine_area            | Restricted to sleep $\geq 5$ and $\leq 9$ hours | 0.0416 | 0.7207        |
| postcentral_area              | Restricted to sleep $\geq 5$ and $\leq 9$ hours | 0.1153 | 0.8581        |
| posteriorcingulate_area       | Restricted to sleep $\geq 5$ and $\leq 9$ hours | 0.7323 | 0.9896        |

| region                        | type                                            | pval   | adjusted_pval |
|-------------------------------|-------------------------------------------------|--------|---------------|
| precentral_area               | Restricted to sleep $\geq 5$ and $\leq 9$ hours | 0.6333 | 0.9896        |
| precuneus_area                | Restricted to sleep $\geq 5$ and $\leq 9$ hours | 0.4931 | 0.9885        |
| rostralanteriorcingulate_area | Restricted to sleep $\geq 5$ and $\leq 9$ hours | 0.7422 | 0.9896        |
| rostralmiddlefrontal_area     | Restricted to sleep $\geq 5$ and $\leq 9$ hours | 0.6140 | 0.9896        |
| superiorfrontal_area          | Restricted to sleep $\geq 5$ and $\leq 9$ hours | 0.9137 | 0.9896        |
| superiorparietal_area         | Restricted to sleep $\geq 5$ and $\leq 9$ hours | 0.8464 | 0.9896        |
| superiortemporal_area         | Restricted to sleep $\geq 5$ and $\leq 9$ hours | 0.8416 | 0.9896        |
| supramarginal_area            | Restricted to sleep $\geq 5$ and $\leq 9$ hours | 0.5299 | 0.9896        |
| transversetemporal_area       | Restricted to sleep $\geq 5$ and $\leq 9$ hours | 0.0372 | 0.7207        |

| region                             | type                                            | pval   | adjusted_pval |
|------------------------------------|-------------------------------------------------|--------|---------------|
| bankssts_thickness                 | Full data                                       | 0.5303 | 0.9896        |
| caudalanteriorcingulate_thickness  | Full data                                       | 0.3036 | 0.9805        |
| caudalmiddlefrontal_thickness      | Full data                                       | 0.3517 | 0.9885        |
| cuneus_thickness                   | Full data                                       | 0.7195 | 0.9896        |
| entorhinal_thickness               | Full data                                       | 0.3002 | 0.9805        |
| frontalpole_thickness              | Full data                                       | 0.8891 | 0.9896        |
| fusiform_thickness                 | Full data                                       | 0.1011 | 0.8416        |
| inferiorparietal_thickness         | Full data                                       | 0.4500 | 0.9885        |
| inferiortemporal_thickness         | Full data                                       | 0.0141 | 0.6476        |
| insula_thickness                   | Full data                                       | 0.2205 | 0.9805        |
| isthmuscingulate_thickness         | Full data                                       | 0.6761 | 0.9896        |
| lateraloccipital_thickness         | Full data                                       | 0.2279 | 0.9805        |
| lateralorbitofrontal_thickness     | Full data                                       | 0.7831 | 0.9896        |
| lingual_thickness                  | Full data                                       | 0.9405 | 0.9896        |
| medialorbitofrontal_thickness      | Full data                                       | 0.4737 | 0.9885        |
| middletemporal_thickness           | Full data                                       | 0.2306 | 0.9805        |
| paracentral_thickness              | Full data                                       | 0.4159 | 0.9885        |
| parahippocampal_thickness          | Full data                                       | 0.8064 | 0.9896        |
| parsopercularis_thickness          | Full data                                       | 0.2067 | 0.9805        |
| parsorbitalis_thickness            | Full data                                       | 0.1240 | 0.8581        |
| parstriangularis_thickness         | Full data                                       | 0.0284 | 0.7207        |
| pericalcarine_thickness            | Full data                                       | 0.8919 | 0.9896        |
| postcentral_thickness              | Full data                                       | 0.7411 | 0.9896        |
| posteriorcingulate_thickness       | Full data                                       | 0.7845 | 0.9896        |
| precentral_thickness               | Full data                                       | 0.2662 | 0.9805        |
| precuneus_thickness                | Full data                                       | 0.1163 | 0.8581        |
| rostralanteriorcingulate_thickness | Full data                                       | 0.3104 | 0.9805        |
| rostralmiddlefrontal_thickness     | Full data                                       | 0.0131 | 0.6476        |
| superiorfrontal_thickness          | Full data                                       | 0.2804 | 0.9805        |
| superiorparietal_thickness         | Full data                                       | 0.0126 | 0.6476        |
| superiortemporal_thickness         | Full data                                       | 0.3068 | 0.9805        |
| supramarginal_thickness            | Full data                                       | 0.0225 | 0.7207        |
| transversetemporal_thickness       | Full data                                       | 0.8394 | 0.9896        |
| bankssts_thickness                 | Restricted to sleep $\geq 5$ and $\leq 9$ hours | 0.6085 | 0.9896        |
| caudalanteriorcingulate_thickness  | Restricted to sleep $\geq 5$ and $\leq 9$ hours | 0.4786 | 0.9885        |
| caudalmiddlefrontal_thickness      | Restricted to sleep $\geq 5$ and $\leq 9$ hours | 0.7160 | 0.9896        |
| cuneus_thickness                   | Restricted to sleep $\geq 5$ and $\leq 9$ hours | 0.9086 | 0.9896        |
| entorhinal_thickness               | Restricted to sleep $\geq 5$ and $\leq 9$ hours | 0.3042 | 0.9805        |
| frontalpole_thickness              | Restricted to sleep $\geq 5$ and $\leq 9$ hours | 0.3307 | 0.9822        |
| fusiform_thickness                 | Restricted to sleep $\geq 5$ and $\leq 9$ hours | 0.0500 | 0.7253        |

| region                             | type                                            | pval   | adjusted_pval |
|------------------------------------|-------------------------------------------------|--------|---------------|
| inferiorparietal_thickness         | Restricted to sleep $\geq 5$ and $\leq 9$ hours | 0.1119 | 0.8581        |
| inferiortemporal_thickness         | Restricted to sleep $\geq 5$ and $\leq 9$ hours | 0.1015 | 0.8416        |
| insula_thickness                   | Restricted to sleep $\geq 5$ and $\leq 9$ hours | 0.6758 | 0.9896        |
| isthmuscingulate_thickness         | Restricted to sleep $\geq 5$ and $\leq 9$ hours | 0.8314 | 0.9896        |
| lateraloccipital_thickness         | Restricted to sleep $\geq 5$ and $\leq 9$ hours | 0.3327 | 0.9832        |
| lateralorbitofrontal_thickness     | Restricted to sleep $\geq 5$ and $\leq 9$ hours | 0.8967 | 0.9896        |
| lingual_thickness                  | Restricted to sleep $\geq 5$ and $\leq 9$ hours | 0.8450 | 0.9896        |
| medialorbitofrontal_thickness      | Restricted to sleep $\geq 5$ and $\leq 9$ hours | 0.7460 | 0.9896        |
| middletemporal_thickness           | Restricted to sleep $\geq 5$ and $\leq 9$ hours | 0.2154 | 0.9805        |
| paracentral_thickness              | Restricted to sleep $\geq 5$ and $\leq 9$ hours | 0.3096 | 0.9805        |
| parahippocampal_thickness          | Restricted to sleep $\geq 5$ and $\leq 9$ hours | 0.5469 | 0.9896        |
| parsopercularis_thickness          | Restricted to sleep $\geq 5$ and $\leq 9$ hours | 0.2374 | 0.9805        |
| parsorbitalis_thickness            | Restricted to sleep $\geq 5$ and $\leq 9$ hours | 0.7928 | 0.9896        |
| parstriangularis_thickness         | Restricted to sleep $\geq 5$ and $\leq 9$ hours | 0.5524 | 0.9896        |
| pericalcarine_thickness            | Restricted to sleep $\geq 5$ and $\leq 9$ hours | 0.9284 | 0.9896        |
| postcentral_thickness              | Restricted to sleep $\geq 5$ and $\leq 9$ hours | 0.7689 | 0.9896        |
| posteriorcingulate_thickness       | Restricted to sleep $\geq 5$ and $\leq 9$ hours | 0.7335 | 0.9896        |
| precentral_thickness               | Restricted to sleep $\geq 5$ and $\leq 9$ hours | 0.7951 | 0.9896        |
| precuneus_thickness                | Restricted to sleep $\geq 5$ and $\leq 9$ hours | 0.4026 | 0.9885        |
| rostralanteriorcingulate_thickness | Restricted to sleep $\geq 5$ and $\leq 9$ hours | 0.3764 | 0.9885        |
| rostralmiddlefrontal_thickness     | Restricted to sleep $\geq 5$ and $\leq 9$ hours | 0.9896 | 0.9947        |
| superiorfrontal_thickness          | Restricted to sleep $\geq 5$ and $\leq 9$ hours | 0.3761 | 0.9885        |
| superiorparietal_thickness         | Restricted to sleep $\geq 5$ and $\leq 9$ hours | 0.7847 | 0.9896        |
| superiortemporal_thickness         | Restricted to sleep $\geq 5$ and $\leq 9$ hours | 0.2952 | 0.9805        |
| supramarginal_thickness            | Restricted to sleep $\geq 5$ and $\leq 9$ hours | 0.4413 | 0.9885        |
| transversetemporal_thickness       | Restricted to sleep $\geq 5$ and $\leq 9$ hours | 0.5919 | 0.9896        |

| region                         | type      | pval   | adjusted_pval |
|--------------------------------|-----------|--------|---------------|
| bankssts_volume                | Full data | 0.4166 | 0.9885        |
| caudalanteriorcingulate_volume | Full data | 0.2375 | 0.9805        |
| caudalmiddlefrontal_volume     | Full data | 0.1050 | 0.8416        |
| cuneus_volume                  | Full data | 0.2412 | 0.9805        |
| entorhinal_volume              | Full data | 0.2558 | 0.9805        |
| frontalpole_volume             | Full data | 0.4731 | 0.9885        |
| fusiform_volume                | Full data | 0.4337 | 0.9885        |
| inferiorparietal_volume        | Full data | 0.0021 | 0.4245        |
| inferiortemporal_volume        | Full data | 0.4990 | 0.9896        |
| insula_volume                  | Full data | 0.2475 | 0.9805        |
| isthmuscingulate_volume        | Full data | 0.4044 | 0.9885        |
| lateraloccipital_volume        | Full data | 0.5943 | 0.9896        |
| lateralorbitofrontal_volume    | Full data | 0.8956 | 0.9896        |
| lingual_volume                 | Full data | 0.9075 | 0.9896        |
| medialorbitofrontal_volume     | Full data | 0.8085 | 0.9896        |
| middletemporal_volume          | Full data | 0.6923 | 0.9896        |
| paracentral_volume             | Full data | 0.1326 | 0.8581        |
| parahippocampal_volume         | Full data | 0.6146 | 0.9896        |
| parsopercularis_volume         | Full data | 0.0546 | 0.7420        |
| parsorbitalis_volume           | Full data | 0.5790 | 0.9896        |
| parstriangularis_volume        | Full data | 0.0491 | 0.7253        |
| pericalcarine_volume           | Full data | 0.8694 | 0.9896        |
| postcentral_volume             | Full data | 0.7460 | 0.9896        |

| region                          | type                                            | pval   | adjusted_pval |
|---------------------------------|-------------------------------------------------|--------|---------------|
| posteriorcingulate_volume       | Full data                                       | 0.8607 | 0.9896        |
| precentral_volume               | Full data                                       | 0.1230 | 0.8581        |
| precuneus_volume                | Full data                                       | 0.3973 | 0.9885        |
| rostralanteriorcingulate_volume | Full data                                       | 0.4334 | 0.9885        |
| rostralmiddlefrontal_volume     | Full data                                       | 0.0452 | 0.7207        |
| superiorfrontal_volume          | Full data                                       | 0.1940 | 0.9805        |
| superiorparietal_volume         | Full data                                       | 0.8357 | 0.9896        |
| superiortemporal_volume         | Full data                                       | 0.5701 | 0.9896        |
| supramarginal_volume            | Full data                                       | 0.4983 | 0.9896        |
| transversetemporal_volume       | Full data                                       | 0.3959 | 0.9885        |
| bankssts_volume                 | Restricted to sleep $\geq 5$ and $\leq 9$ hours | 0.2429 | 0.9805        |
| caudalanteriorcingulate_volume  | Restricted to sleep $\geq 5$ and $\leq 9$ hours | 0.2999 | 0.9805        |
| caudalmiddlefrontal_volume      | Restricted to sleep $\geq 5$ and $\leq 9$ hours | 0.9692 | 0.9907        |
| cuneus_volume                   | Restricted to sleep $\geq 5$ and $\leq 9$ hours | 0.4868 | 0.9885        |
| entorhinal_volume               | Restricted to sleep $\geq 5$ and $\leq 9$ hours | 0.3033 | 0.9805        |
| frontalpole_volume              | Restricted to sleep $\geq 5$ and $\leq 9$ hours | 0.1732 | 0.9349        |
| fusiform_volume                 | Restricted to sleep $\geq 5$ and $\leq 9$ hours | 0.2101 | 0.9805        |
| inferiorparietal_volume         | Restricted to sleep $\geq 5$ and $\leq 9$ hours | 0.0730 | 0.8080        |
| inferiortemporal_volume         | Restricted to sleep $\geq 5$ and $\leq 9$ hours | 0.3542 | 0.9885        |
| insula_volume                   | Restricted to sleep $\geq 5$ and $\leq 9$ hours | 0.2292 | 0.9805        |
| isthmuscingulate_volume         | Restricted to sleep $\geq 5$ and $\leq 9$ hours | 0.6482 | 0.9896        |
| lateraloccipital_volume         | Restricted to sleep $\geq 5$ and $\leq 9$ hours | 0.5646 | 0.9896        |
| lateralorbitofrontal_volume     | Restricted to sleep $\geq 5$ and $\leq 9$ hours | 0.9782 | 0.9932        |
| lingual_volume                  | Restricted to sleep $\geq 5$ and $\leq 9$ hours | 0.8670 | 0.9896        |
| medialorbitofrontal_volume      | Restricted to sleep $\geq 5$ and $\leq 9$ hours | 0.7999 | 0.9896        |
| middletemporal_volume           | Restricted to sleep $\geq 5$ and $\leq 9$ hours | 0.7636 | 0.9896        |
| paracentral_volume              | Restricted to sleep $\geq 5$ and $\leq 9$ hours | 0.0934 | 0.8416        |
| parahippocampal_volume          | Restricted to sleep $\geq 5$ and $\leq 9$ hours | 0.4942 | 0.9885        |
| parsopercularis_volume          | Restricted to sleep $\geq 5$ and $\leq 9$ hours | 0.1362 | 0.8581        |
| parsorbitalis_volume            | Restricted to sleep $\geq 5$ and $\leq 9$ hours | 0.8966 | 0.9896        |
| parstriangularis_volume         | Restricted to sleep $\geq 5$ and $\leq 9$ hours | 0.7719 | 0.9896        |
| pericalcarine_volume            | Restricted to sleep $\geq 5$ and $\leq 9$ hours | 0.7222 | 0.9896        |
| postcentral_volume              | Restricted to sleep $\geq 5$ and $\leq 9$ hours | 0.7645 | 0.9896        |
| posteriorcingulate_volume       | Restricted to sleep $\geq 5$ and $\leq 9$ hours | 0.6627 | 0.9896        |
| precentral_volume               | Restricted to sleep $\geq 5$ and $\leq 9$ hours | 0.9288 | 0.9896        |
| precuneus_volume                | Restricted to sleep $\geq 5$ and $\leq 9$ hours | 0.3367 | 0.9853        |
| rostralanteriorcingulate_volume | Restricted to sleep $\geq 5$ and $\leq 9$ hours | 0.4423 | 0.9885        |
| rostralmiddlefrontal_volume     | Restricted to sleep $\geq 5$ and $\leq 9$ hours | 0.5873 | 0.9896        |
| superiorfrontal_volume          | Restricted to sleep $\geq 5$ and $\leq 9$ hours | 0.4283 | 0.9885        |
| superiorparietal_volume         | Restricted to sleep $\geq 5$ and $\leq 9$ hours | 0.9393 | 0.9896        |
| superiortemporal_volume         | Restricted to sleep $\geq 5$ and $\leq 9$ hours | 0.5884 | 0.9896        |
| supramarginal_volume            | Restricted to sleep $\geq 5$ and $\leq 9$ hours | 0.5451 | 0.9896        |
| transversetemporal_volume       | Restricted to sleep $\geq 5$ and $\leq 9$ hours | 0.2133 | 0.9805        |

Below is a plot of corrected and raw p-values for the case of using all data with two or more timepoints.



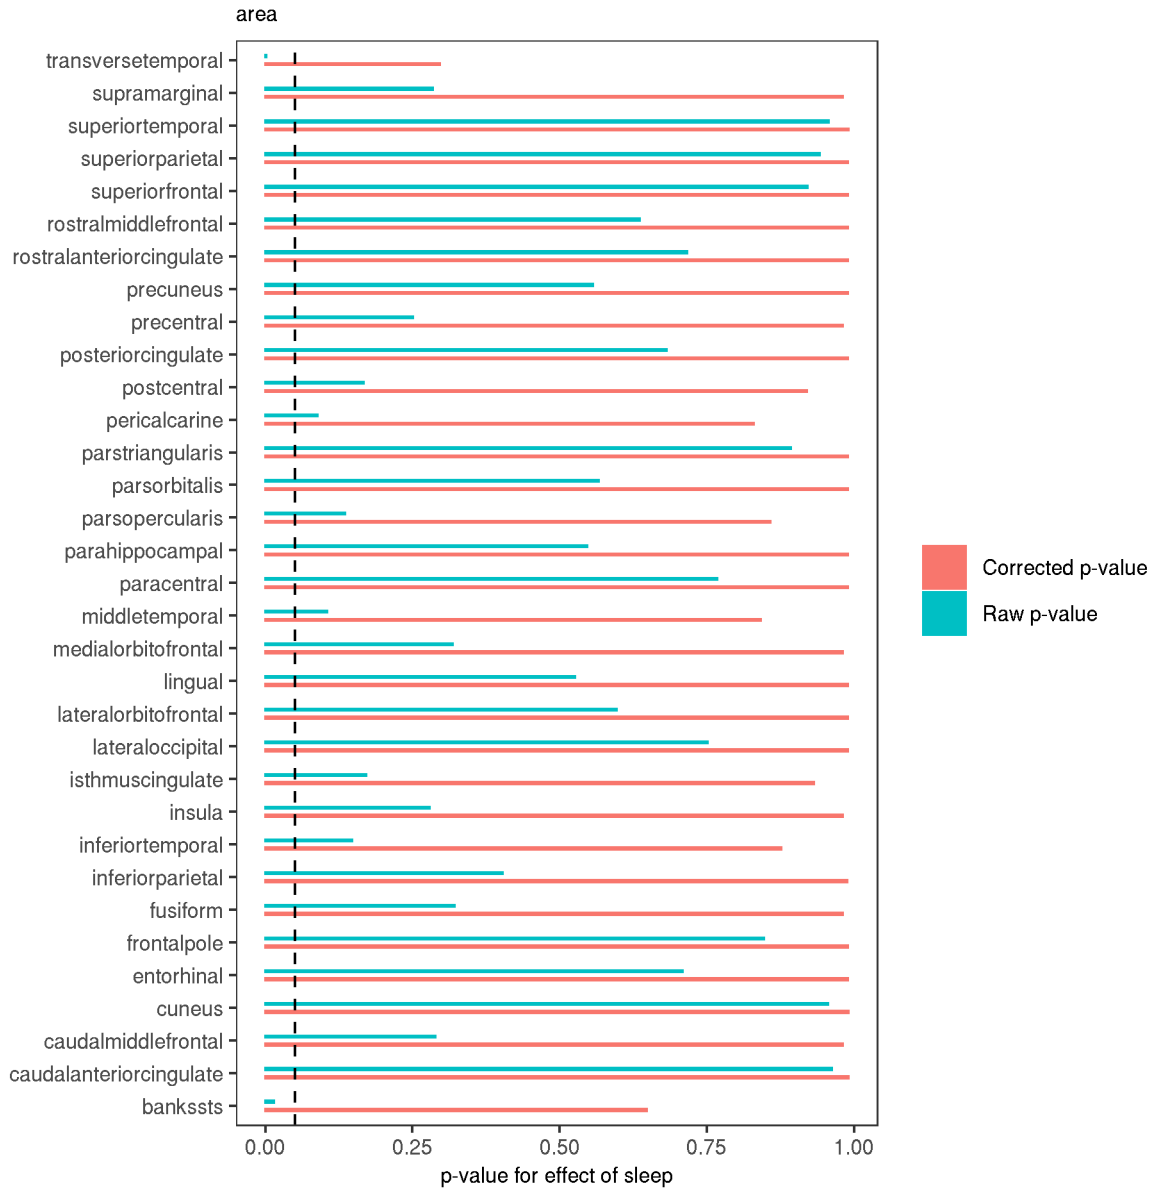

Below is a comparison of corrected p-values for the various cases.

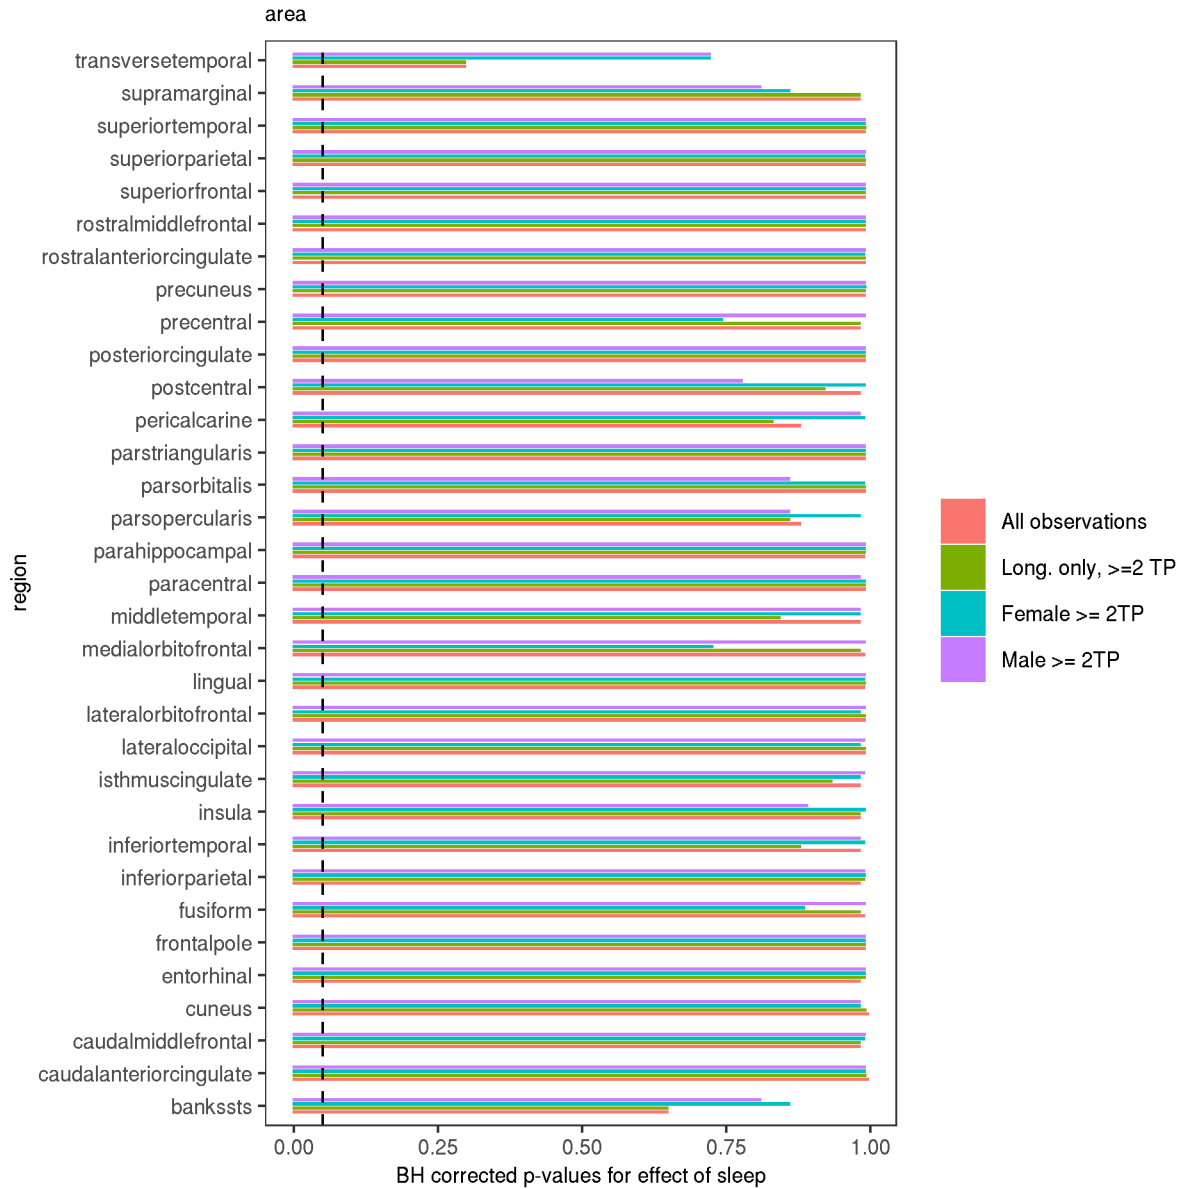

Below is a plot of corrected and raw p-values for the case of using all data with two or more timepoints.

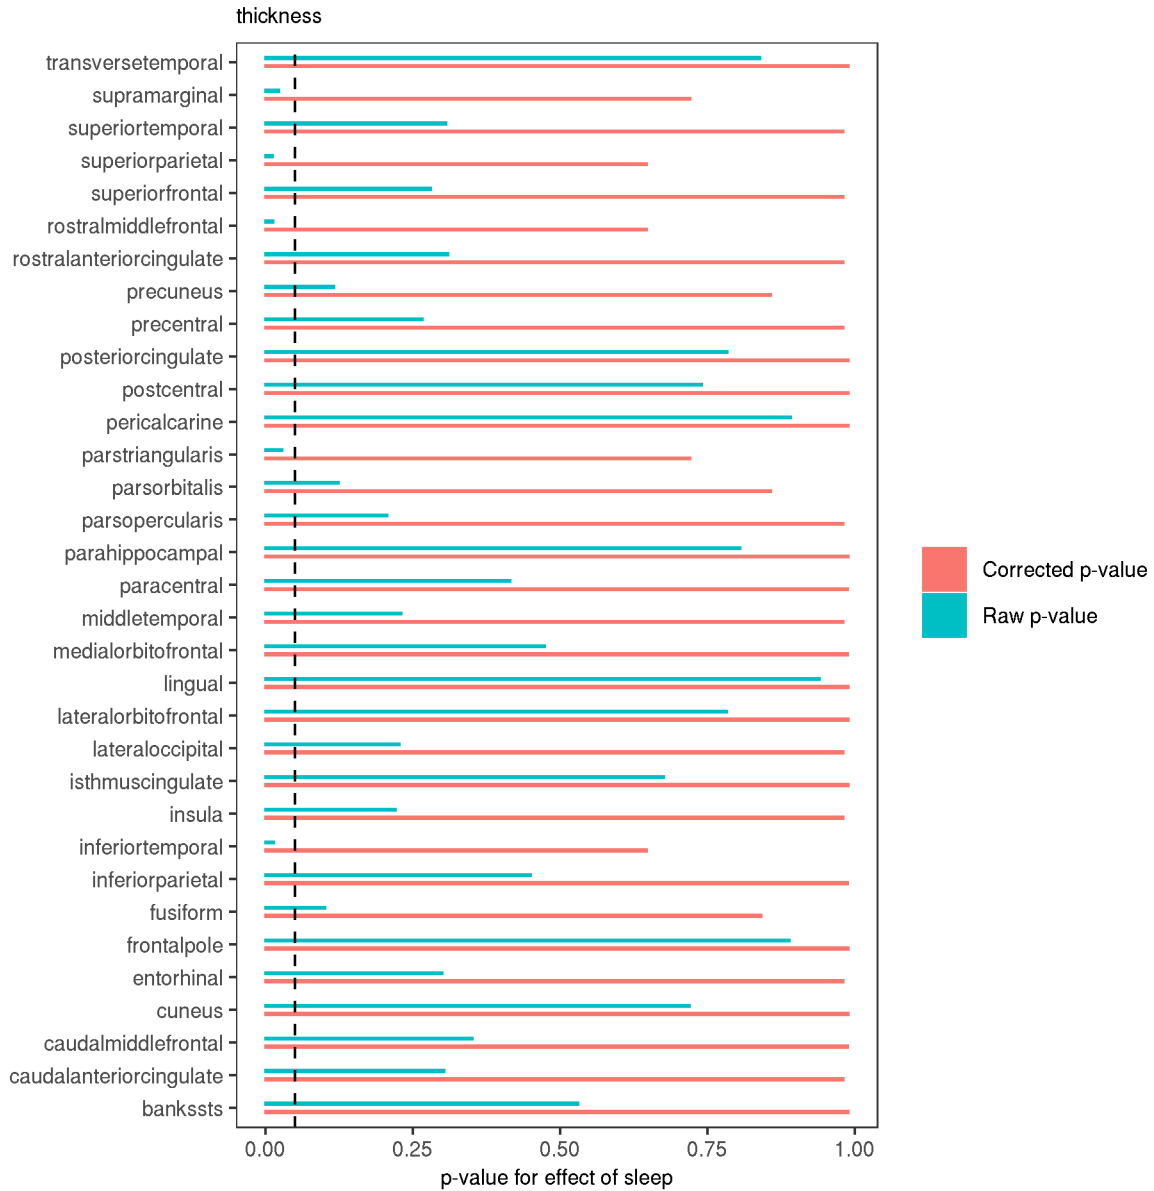

Below is a comparison of corrected p-values for the various cases.

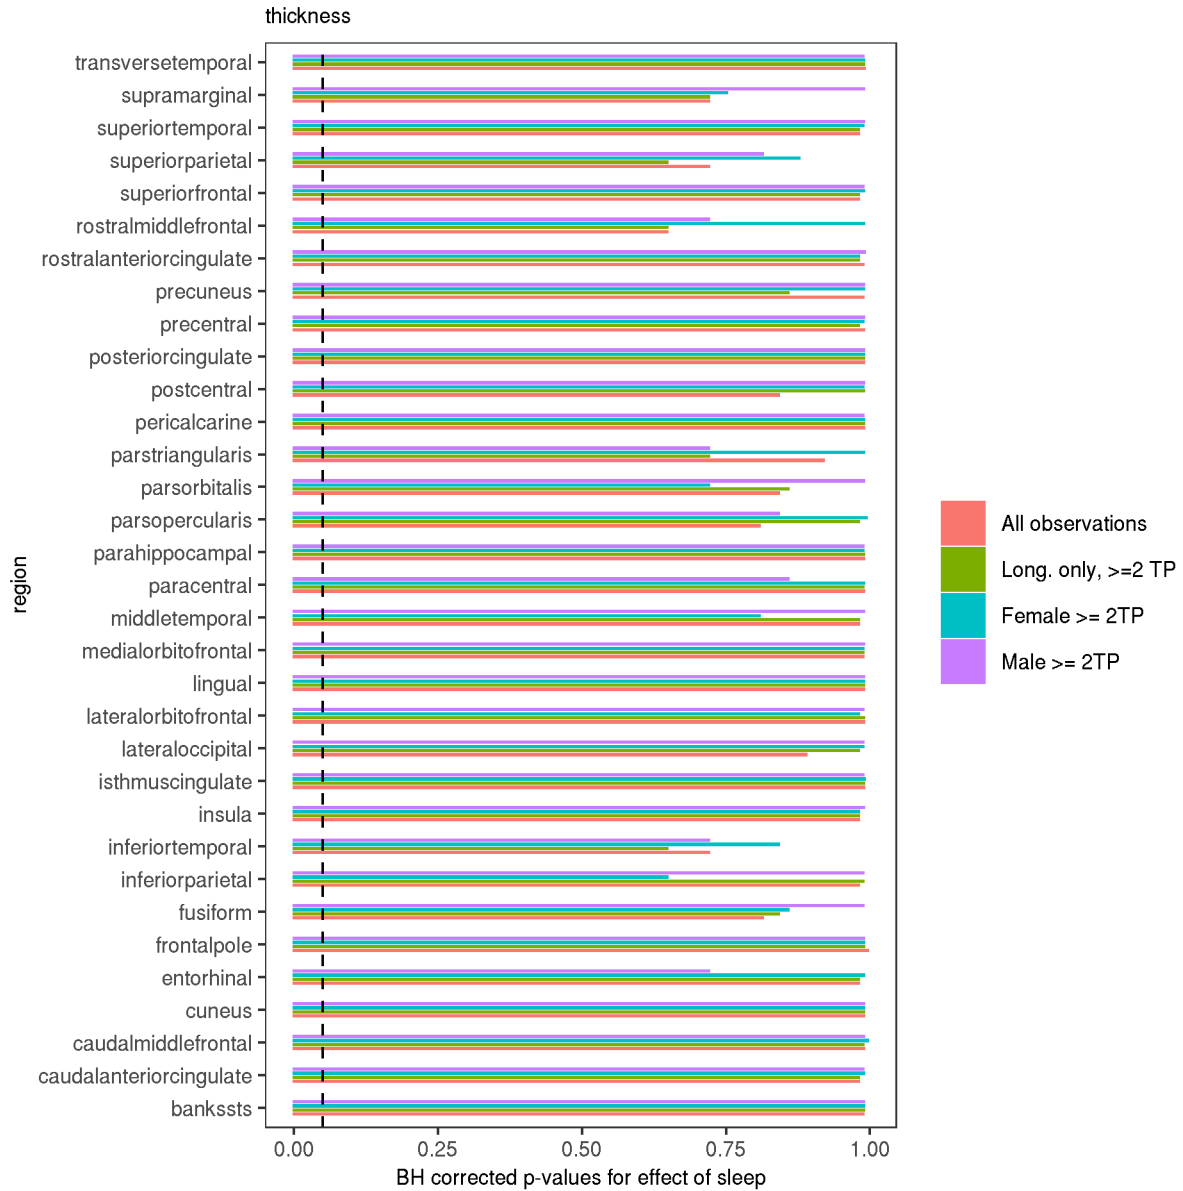

Below is a plot of corrected and raw p-values for the case of using all data with two or more timepoints.

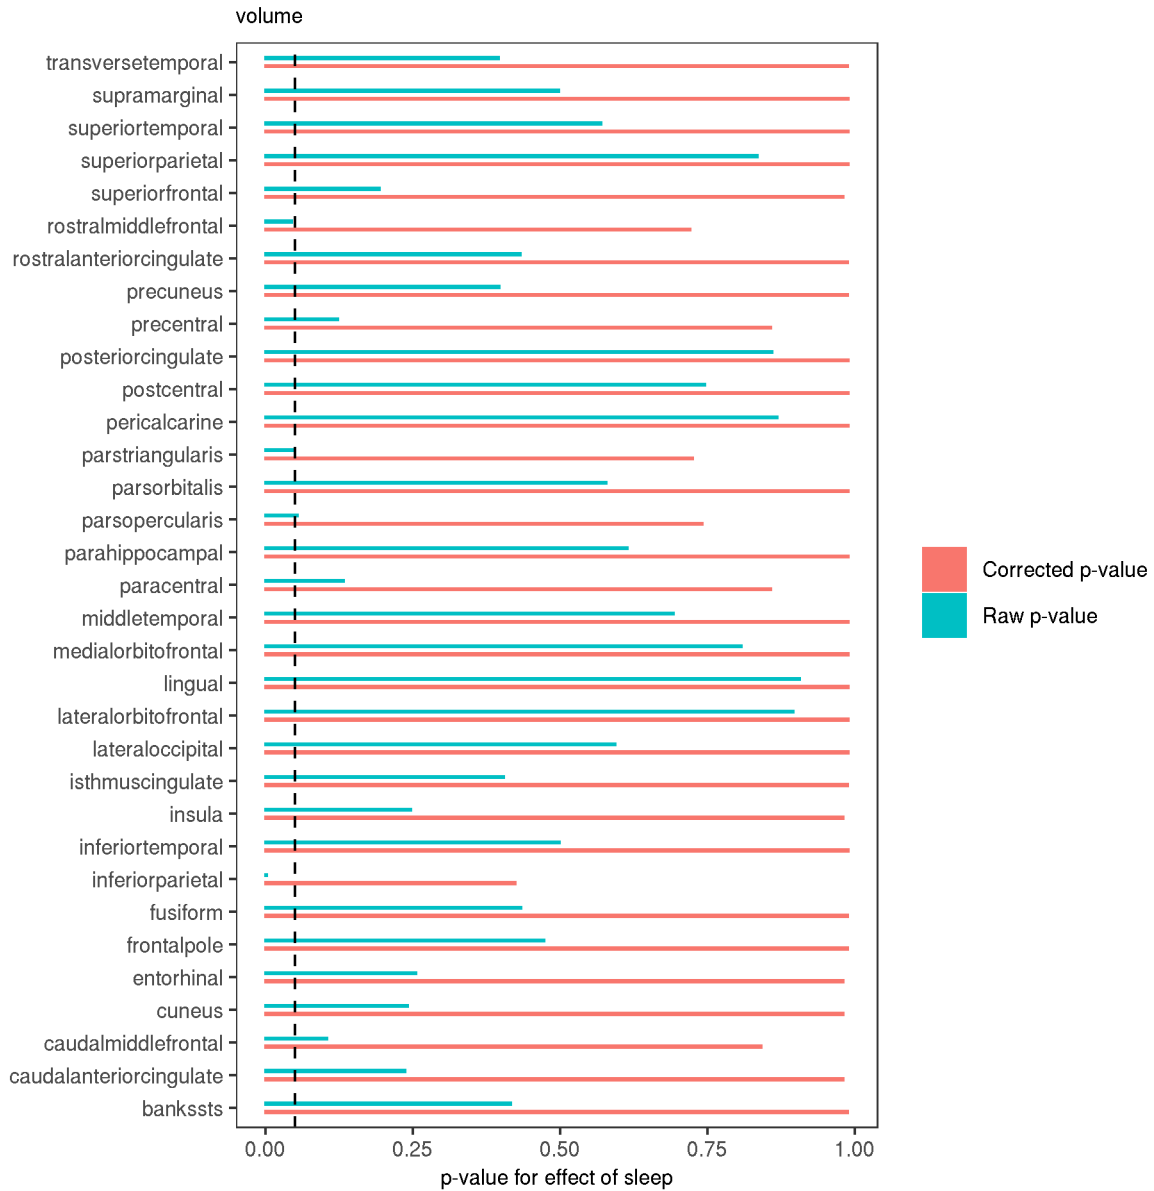

Below is a comparison of corrected p-values for the various cases.

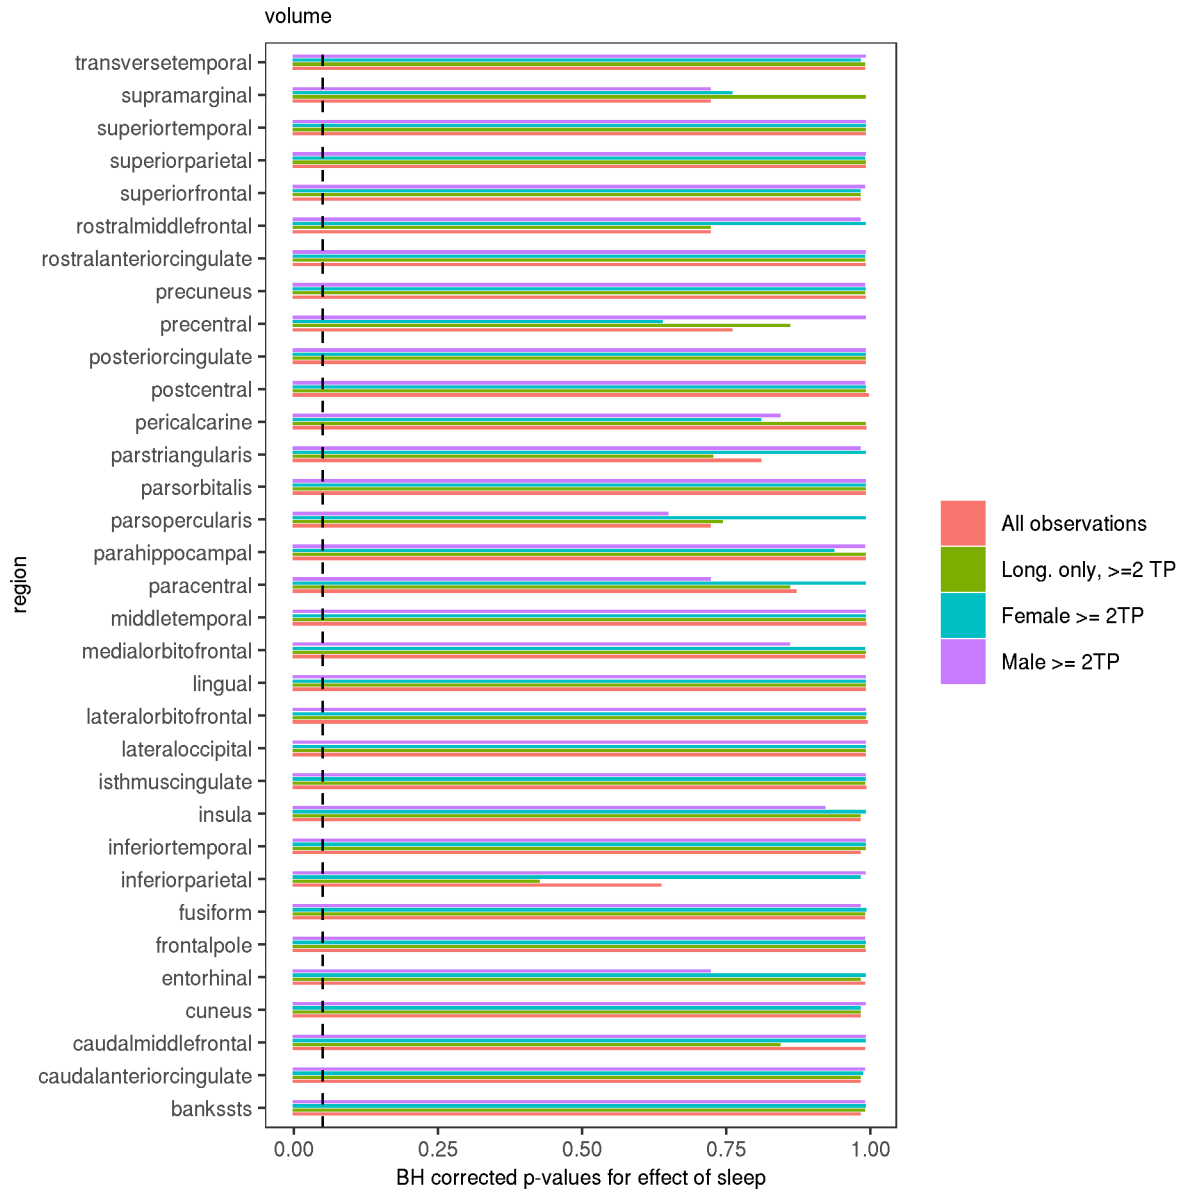

## Models per cluster

### Area cluster 1

#### All longitudinal data

```
##
## Family: gaussian
## Link function: identity
##
## Formula:
## value ~ sex + site + s(bl_age, k = 10, bs = "cr") + s(bl_age,
##   by = sleep_z, bs = "cr") + +s(bl_age, by = time, k = 5, bs = "cr") +
```

```

##      s(sleep_z, by = time, k = 5, bs = "cr", pc = 0)
## <environment: 0x563034c82f38>
##
## Parametric coefficients:
##              Estimate Std. Error t value Pr(>|t|)
## (Intercept)   40068.0     235.4 170.211 < 2e-16 ***
## sexmale       4109.4      121.3  33.882 < 2e-16 ***
## siteousAvanto 2277.6      312.3   7.293 3.32e-13 ***
## siteousPrisma 2225.1      648.6   3.431 0.000605 ***
## siteousSkyra  2849.2      312.2   9.127 < 2e-16 ***
## siteUB        -709.5      648.5  -1.094 0.273952
## siteUCAM       681.8      327.9   2.079 0.037650 *
## siteUKB        885.1      233.5   3.790 0.000152 ***
## siteUmU       2183.0      395.3   5.523 3.44e-08 ***
## ---
## Signif. codes:  0 '***' 0.001 '**' 0.01 '*' 0.05 '.' 0.1 ' ' 1
##
## Approximate significance of smooth terms:
##              edf Ref.df      F p-value
## s(bl_age)      1.000  1.000 221.669 <2e-16 ***
## s(bl_age):sleep_z 2.000  2.000   1.773   0.170
## s(bl_age):time  3.346  3.346 150.081 <2e-16 ***
## s(sleep_z):time  1.000  1.000   0.008   0.929
## ---
## Signif. codes:  0 '***' 0.001 '**' 0.01 '*' 0.05 '.' 0.1 ' ' 1
##
## R-sq.(adj) =  0.277
## lmer.REML = 1.4678e+05  Scale est. = 5.4843e+05  n = 8178

```

Longitudinal effect varying with sleep

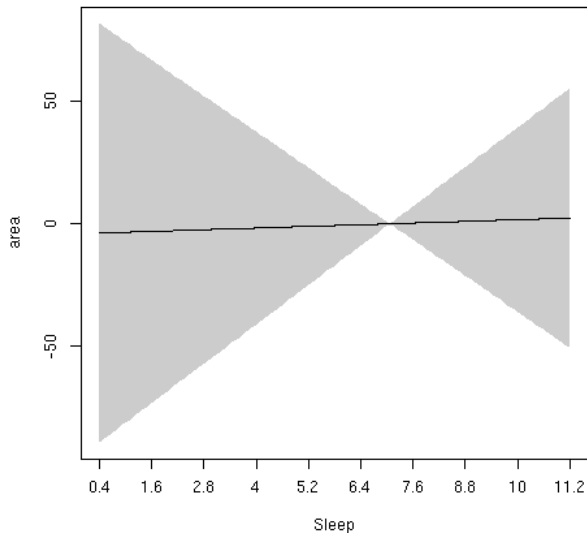

### Participants sleeping 5-9 hours

```

##
## Family: gaussian

```

```

## Link function: identity
##
## Formula:
## value ~ sex + site + s(bl_age, k = 10, bs = "cr") + s(bl_age,
##   by = sleep_z, bs = "cr") + s(bl_age, by = time, k = 5, bs = "cr") +
##   s(sleep_z, by = time, k = 5, bs = "cr", pc = 0)
## <environment: 0x563034c82f38>
##
## Parametric coefficients:
##           Estimate Std. Error t value Pr(>|t|)
## (Intercept)  40068.0    235.4 170.211 < 2e-16 ***
## sexmale      4109.4     121.3  33.882 < 2e-16 ***
## siteousAvanto 2277.6     312.3   7.293 3.32e-13 ***
## siteousPrisma 2225.1     648.6   3.431 0.000605 ***
## siteousSkyra  2849.2     312.2   9.127 < 2e-16 ***
## siteUB       -709.5     648.5  -1.094 0.273952
## siteUCAM      681.8     327.9   2.079 0.037650 *
## siteUKB       885.1     233.5   3.790 0.000152 ***
## siteUmU      2183.0     395.3   5.523 3.44e-08 ***
## ---
## Signif. codes:  0 '***' 0.001 '**' 0.01 '*' 0.05 '.' 0.1 ' ' 1
##
## Approximate significance of smooth terms:
##           edf Ref.df      F p-value
## s(bl_age)      1.000  1.000 221.669 <2e-16 ***
## s(bl_age):sleep_z 2.000  2.000   1.773  0.170
## s(bl_age):time  3.346  3.346 150.081 <2e-16 ***
## s(sleep_z):time  1.000  1.000   0.008  0.929
## ---
## Signif. codes:  0 '***' 0.001 '**' 0.01 '*' 0.05 '.' 0.1 ' ' 1
##
## R-sq.(adj) =  0.277
## lmer.REML = 1.4678e+05  Scale est. = 5.4843e+05  n = 8178

```

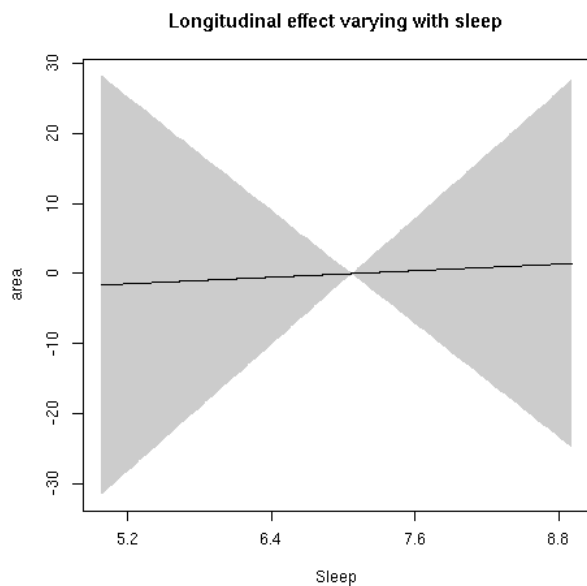



## Thickness cluster 1

### All longitudinal data

```
##
## Family: gaussian
## Link function: identity
##
## Formula:
## value ~ sex + site + s(bl_age, k = 10, bs = "cr") + s(bl_age,
##   by = sleep_z, bs = "cr") + s(bl_age, by = time, k = 5, bs = "cr") +
##   s(sleep_z, by = time, k = 5, bs = "cr", pc = 0)
## <environment: 0x563005f9cdf8>
##
## Parametric coefficients:
##           Estimate Std. Error t value Pr(>|t|)
## (Intercept)  2.1062223  0.0056688 371.543 < 2e-16 ***
## sexmale      0.0037645  0.0028417   1.325  0.18529
## siteousAvanto -0.0006973  0.0075599  -0.092  0.92651
## siteousPrisma  0.1030956  0.0338983   3.041  0.00236 **
## siteousSkyra   0.0756025  0.0075556  10.006 < 2e-16 ***
## siteUB        0.0893057  0.0150182   5.947 2.85e-09 ***
## siteUCAM      0.0717592  0.0077948   9.206 < 2e-16 ***
## siteUKB       0.2241622  0.0057408  39.047 < 2e-16 ***
## siteUmU       0.0689326  0.0093485   7.374 1.82e-13 ***
## ---
## Signif. codes:  0 '***' 0.001 '**' 0.01 '*' 0.05 '.' 0.1 ' ' 1
##
## Approximate significance of smooth terms:
##           edf Ref.df      F p-value
## s(bl_age)      3.429  3.429 122.718 <2e-16 ***
## s(bl_age):sleep_z 2.000  2.000   0.224  0.800
## s(bl_age):time  3.527  3.527  41.841 <2e-16 ***
## s(sleep_z):time  1.000  1.000   0.040  0.841
## ---
## Signif. codes:  0 '***' 0.001 '**' 0.01 '*' 0.05 '.' 0.1 ' ' 1
##
## R-sq.(adj) =  0.475
## lmer.REML = -19501  Scale est. = 0.0020038  n = 8178
```

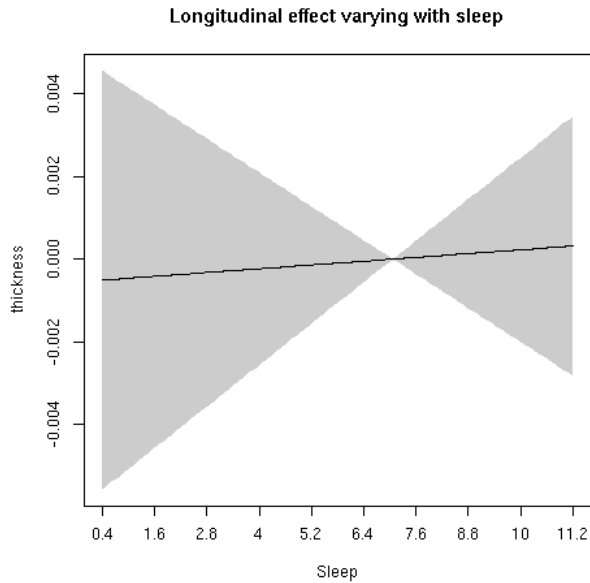

### Participants sleeping 5-9 hours

```
##
## Family: gaussian
## Link function: identity
##
## Formula:
## value ~ sex + site + s(bl_age, k = 10, bs = "cr") + s(bl_age,
##   by = sleep_z, bs = "cr") + +s(bl_age, by = time, k = 5, bs = "cr") +
##   s(sleep_z, by = time, k = 5, bs = "cr", pc = 0)
## <environment: 0x563005f9cdf8>
##
## Parametric coefficients:
##               Estimate Std. Error t value Pr(>|t|)
## (Intercept)  2.1062223  0.0056688 371.543 < 2e-16 ***
## sexmale      0.0037645  0.0028417   1.325  0.18529
## siteousAvanto -0.0006973  0.0075599  -0.092  0.92651
## siteousPrisma  0.1030956  0.0338983   3.041  0.00236 **
## siteousSkyra   0.0756025  0.0075556  10.006 < 2e-16 ***
## siteUB        0.0893057  0.0150182   5.947  2.85e-09 ***
## siteUCAM      0.0717592  0.0077948   9.206 < 2e-16 ***
## siteUKB       0.2241622  0.0057408  39.047 < 2e-16 ***
## siteUmU       0.0689326  0.0093485   7.374  1.82e-13 ***
## ---
## Signif. codes:  0 '***' 0.001 '**' 0.01 '*' 0.05 '.' 0.1 ' ' 1
##
## Approximate significance of smooth terms:
##               edf Ref.df      F p-value
## s(bl_age)      3.429  3.429 122.718 <2e-16 ***
## s(bl_age):sleep_z 2.000  2.000   0.224   0.800
## s(bl_age):time  3.527  3.527  41.841 <2e-16 ***
## s(sleep_z):time  1.000  1.000   0.040   0.841
```

```
## ---
## Signif. codes:  0 '***' 0.001 '**' 0.01 '*' 0.05 '.' 0.1 ' ' 1
##
## R-sq.(adj) =  0.475
## lmer.REML = -19501  Scale est. = 0.0020038  n = 8178
```

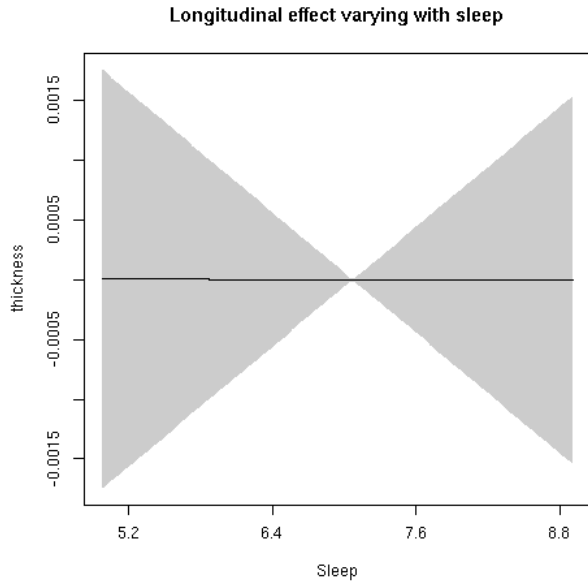

## Volume cluster 1

### All longitudinal data

```
##
## Family: gaussian
## Link function: identity
##
## Formula:
## value ~ sex + site + s(bl_age, k = 10, bs = "cr") + s(bl_age,
##   by = sleep_z, bs = "cr") + s(bl_age, by = time, k = 5, bs = "cr") +
##   s(sleep_z, by = time, k = 5, bs = "cr", pc = 0)
## <environment: 0x563005e93210>
##
## Parametric coefficients:
##               Estimate Std. Error t value Pr(>|t|)
## (Intercept)  207103.9    1262.5  164.042 < 2e-16 ***
## sexmale      25397.8      641.8   39.575 < 2e-16 ***
## siteousAvanto 15482.5     1660.9    9.322 < 2e-16 ***
## siteousPrisma 27545.8     4292.3    6.417 1.46e-10 ***
## siteousSkyra  18875.1     1660.1   11.370 < 2e-16 ***
## siteUB       10358.6     3428.0    3.022 0.00252 **
## siteUCAM     16949.3     1739.4    9.744 < 2e-16 ***
## siteUKB      34700.7     1268.5   27.356 < 2e-16 ***
## siteUmU      18233.2     2100.0    8.682 < 2e-16 ***
## ---
## Signif. codes:  0 '***' 0.001 '**' 0.01 '*' 0.05 '.' 0.1 ' ' 1
```

```
##
## Approximate significance of smooth terms:
##           edf Ref.df      F p-value
## s(bl_age)      1.797  1.797 371.314 <2e-16 ***
## s(bl_age):sleep_z 2.413  2.413  1.296  0.199
## s(bl_age):time   3.997  3.997 202.442 <2e-16 ***
## s(sleep_z):time  1.000  1.000  0.044  0.835
## ---
## Signif. codes:  0 '***' 0.001 '**' 0.01 '*' 0.05 '.' 0.1 ' ' 1
##
## R-sq.(adj) =  0.448
## lmer.REML = 1.7642e+05  Scale est. = 2.6866e+07  n = 8178
```

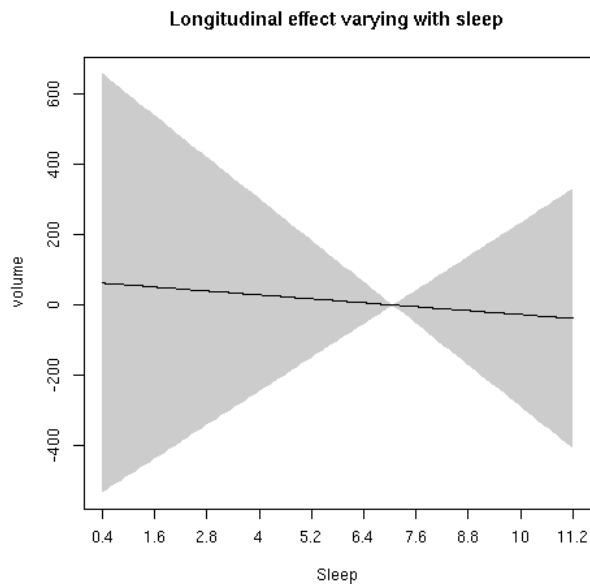

### Participants sleeping 5-9 hours

```
##
## Family: gaussian
## Link function: identity
##
## Formula:
## value ~ sex + site + s(bl_age, k = 10, bs = "cr") + s(bl_age,
##   by = sleep_z, bs = "cr") + s(bl_age, by = time, k = 5, bs = "cr") +
##   s(sleep_z, by = time, k = 5, bs = "cr", pc = 0)
## <environment: 0x563005e93210>
##
## Parametric coefficients:
##           Estimate Std. Error t value Pr(>|t|)
## (Intercept) 207103.9   1262.5 164.042 < 2e-16 ***
## sexmale      25397.8     641.8  39.575 < 2e-16 ***
## siteousAvanto 15482.5    1660.9   9.322 < 2e-16 ***
## siteousPrisma 27545.8    4292.3   6.417 1.46e-10 ***
## siteousSkyra  18875.1    1660.1  11.370 < 2e-16 ***
## siteUB       10358.6    3428.0   3.022 0.00252 **
```

```

## siteUCAM      16949.3    1739.4    9.744 < 2e-16 ***
## siteUKB      34700.7    1268.5   27.356 < 2e-16 ***
## siteUmU      18233.2    2100.0    8.682 < 2e-16 ***
## ---
## Signif. codes:  0 '***' 0.001 '**' 0.01 '*' 0.05 '.' 0.1 ' ' 1
##
## Approximate significance of smooth terms:
##              edf Ref.df      F p-value
## s(bl_age)      1.797  1.797 371.314 <2e-16 ***
## s(bl_age):sleep_z 2.413  2.413   1.296   0.199
## s(bl_age):time   3.997  3.997 202.442 <2e-16 ***
## s(sleep_z):time  1.000  1.000   0.044   0.835
## ---
## Signif. codes:  0 '***' 0.001 '**' 0.01 '*' 0.05 '.' 0.1 ' ' 1
##
## R-sq.(adj) =  0.448
## lmer.REML = 1.7642e+05  Scale est. = 2.6866e+07  n = 8178

```

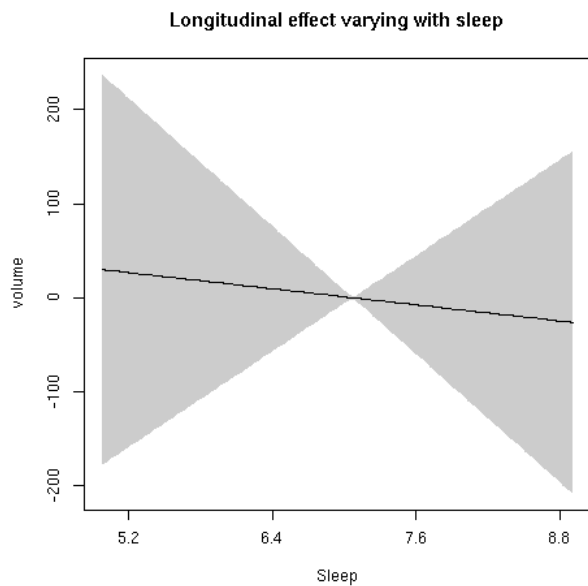

## Area cluster 2

### All longitudinal data

```

##
## Family: gaussian
## Link function: identity
##
## Formula:
## value ~ sex + site + s(bl_age, k = 10, bs = "cr") + s(bl_age,
##   by = sleep_z, bs = "cr") + s(bl_age, by = time, k = 5, bs = "cr") +
##   s(sleep_z, by = time, k = 5, bs = "cr", pc = 0)
## <environment: 0x563004d659a8>
##
## Parametric coefficients:

```

```

##           Estimate Std. Error t value Pr(>|t|)
## (Intercept) 16483.39    98.57 167.220 < 2e-16 ***
## sexmale     1805.53     50.79  35.549 < 2e-16 ***
## siteousAvanto 1481.92    130.85  11.325 < 2e-16 ***
## siteousPrisma  790.78    280.95   2.815  0.00489 **
## siteousSkyra  1400.82    130.79  10.711 < 2e-16 ***
## siteUB      -118.91    271.49  -0.438  0.66141
## siteUCAM     546.27    137.33   3.978  7.02e-05 ***
## siteUKB      413.25     97.79   4.226  2.41e-05 ***
## siteUmU     1537.00    165.52   9.286 < 2e-16 ***
## ---
## Signif. codes:  0 '***' 0.001 '**' 0.01 '*' 0.05 '.' 0.1 ' ' 1
##
## Approximate significance of smooth terms:
##           edf Ref.df      F p-value
## s(bl_age)      1.000  1.000 334.383 <2e-16 ***
## s(bl_age):sleep_z 2.302  2.302   2.000  0.0986 .
## s(bl_age):time  4.698  4.698  88.586 <2e-16 ***
## s(sleep_z):time  1.000  1.000   0.624  0.4294
## ---
## Signif. codes:  0 '***' 0.001 '**' 0.01 '*' 0.05 '.' 0.1 ' ' 1
##
## R-sq.(adj) =  0.329
## lmer.REML = 1.3292e+05  Scale est. = 1.0494e+05  n = 8178

```

Longitudinal effect varying with sleep

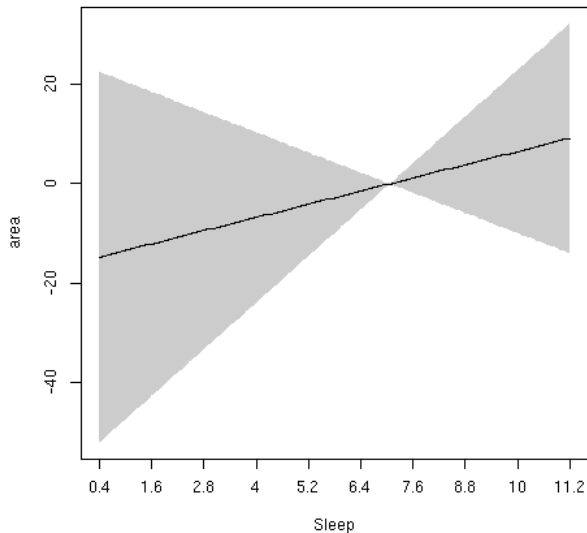

### Participants sleeping 5-9 hours

```

##
## Family: gaussian
## Link function: identity
##
## Formula:
## value ~ sex + site + s(bl_age, k = 10, bs = "cr") + s(bl_age,

```

```

##      by = sleep_z, bs = "cr") + s(bl_age, by = time, k = 5, bs = "cr") +
##      s(sleep_z, by = time, k = 5, bs = "cr", pc = 0)
## <environment: 0x563004d659a8>
##
## Parametric coefficients:
##              Estimate Std. Error t value Pr(>|t|)
## (Intercept)  16483.39     98.57  167.220 < 2e-16 ***
## sexmale      1805.53      50.79   35.549 < 2e-16 ***
## siteousAvanto 1481.92     130.85  11.325 < 2e-16 ***
## siteousPrisma  790.78     280.95   2.815  0.00489 **
## siteousSkyra  1400.82     130.79  10.711 < 2e-16 ***
## siteUB       -118.91     271.49  -0.438  0.66141
## siteUCAM      546.27     137.33   3.978  7.02e-05 ***
## siteUKB       413.25      97.79   4.226  2.41e-05 ***
## siteUmU       1537.00     165.52   9.286 < 2e-16 ***
## ---
## Signif. codes:  0 '***' 0.001 '**' 0.01 '*' 0.05 '.' 0.1 ' ' 1
##
## Approximate significance of smooth terms:
##              edf Ref.df      F p-value
## s(bl_age)      1.000  1.000 334.383 <2e-16 ***
## s(bl_age):sleep_z 2.302  2.302   2.000  0.0986 .
## s(bl_age):time  4.698  4.698  88.586 <2e-16 ***
## s(sleep_z):time  1.000  1.000   0.624  0.4294
## ---
## Signif. codes:  0 '***' 0.001 '**' 0.01 '*' 0.05 '.' 0.1 ' ' 1
##
## R-sq.(adj) =  0.329
## lmer.REML = 1.3292e+05  Scale est. = 1.0494e+05  n = 8178

```

Longitudinal effect varying with sleep

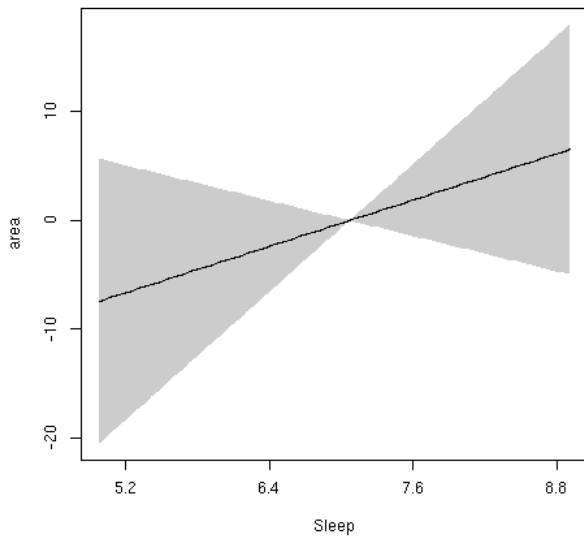

## Thickness cluster 2

### All longitudinal data

```
##
## Family: gaussian
## Link function: identity
##
## Formula:
## value ~ sex + site + s(bl_age, k = 10, bs = "cr") + s(bl_age,
##   by = sleep_z, bs = "cr") + s(bl_age, by = time, k = 5, bs = "cr") +
##   s(sleep_z, by = time, k = 5, bs = "cr", pc = 0)
## <environment: 0x56300a2a08d0>
##
## Parametric coefficients:
##           Estimate Std. Error t value Pr(>|t|)
## (Intercept)  2.503990   0.005808  431.145 < 2e-16 ***
## sexmale      -0.002010   0.002907  -0.691  0.4893
## siteousAvanto 0.012177   0.007730   1.575  0.1152
## siteousPrisma 0.075641   0.034028   2.223  0.0262 *
## siteousSkyra -0.015444   0.007727  -1.999  0.0457 *
## siteUB        0.081258   0.015380   5.283  1.3e-07 ***
## siteUCAM      0.067074   0.008002   8.382 < 2e-16 ***
## siteUKB       0.307295   0.005889  52.179 < 2e-16 ***
## siteUmU      -0.024603   0.009569  -2.571  0.0102 *
## ---
## Signif. codes:  0 '***' 0.001 '**' 0.01 '*' 0.05 '.' 0.1 ' ' 1
##
## Approximate significance of smooth terms:
##           edf Ref.df      F p-value
## s(bl_age)      3.961  3.961 255.420 <2e-16 ***
## s(bl_age):sleep_z 2.000  2.000   0.799   0.450
## s(bl_age):time  3.678  3.678  86.913 <2e-16 ***
## s(sleep_z):time 1.000  1.000   0.425   0.515
## ---
## Signif. codes:  0 '***' 0.001 '**' 0.01 '*' 0.05 '.' 0.1 ' ' 1
##
## R-sq.(adj) =  0.686
## lmer.REML = -19313  Scale est. = 0.0020073  n = 8178
```



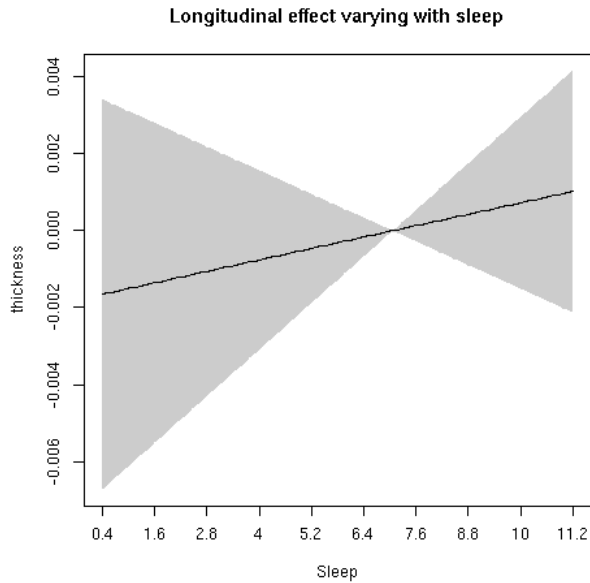

### Participants sleeping 5-9 hours

```
##
## Family: gaussian
## Link function: identity
##
## Formula:
## value ~ sex + site + s(bl_age, k = 10, bs = "cr") + s(bl_age,
##   by = sleep_z, bs = "cr") + +s(bl_age, by = time, k = 5, bs = "cr") +
##   s(sleep_z, by = time, k = 5, bs = "cr", pc = 0)
## <environment: 0x56300a2a08d0>
##
## Parametric coefficients:
##           Estimate Std. Error t value Pr(>|t|)
## (Intercept)  2.503990  0.005808  431.145 < 2e-16 ***
## sexmale      -0.002010  0.002907  -0.691  0.4893
## siteousAvanto  0.012177  0.007730   1.575  0.1152
## siteousPrisma  0.075641  0.034028   2.223  0.0262 *
## siteousSkyra  -0.015444  0.007727  -1.999  0.0457 *
## siteUB        0.081258  0.015380   5.283  1.3e-07 ***
## siteUCAM      0.067074  0.008002   8.382 < 2e-16 ***
## siteUKB       0.307295  0.005889  52.179 < 2e-16 ***
## siteUmU       -0.024603  0.009569  -2.571  0.0102 *
## ---
## Signif. codes:  0 '***' 0.001 '**' 0.01 '*' 0.05 '.' 0.1 ' ' 1
##
## Approximate significance of smooth terms:
##           edf Ref.df      F p-value
## s(bl_age)      3.961  3.961 255.420 <2e-16 ***
## s(bl_age):sleep_z 2.000  2.000   0.799  0.450
## s(bl_age):time  3.678  3.678  86.913 <2e-16 ***
## s(sleep_z):time  1.000  1.000   0.425  0.515
```

```
## ---
## Signif. codes:  0 '***' 0.001 '**' 0.01 '*' 0.05 '.' 0.1 ' ' 1
##
## R-sq.(adj) =  0.686
## lmer.REML = -19313  Scale est. = 0.0020073  n = 8178
```

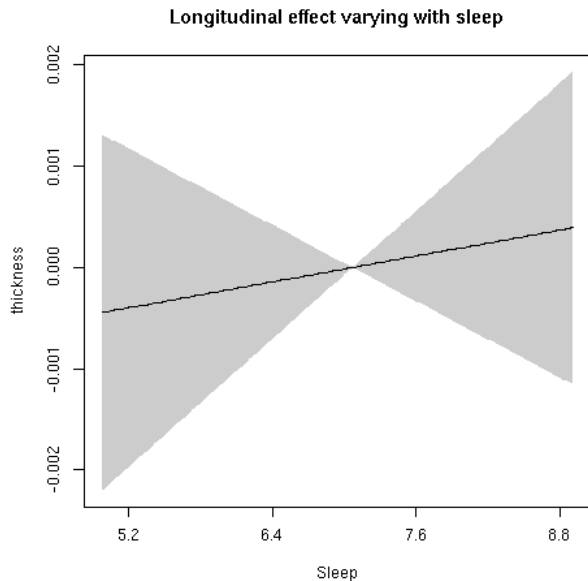

## Volume cluster 2

### All longitudinal data

```
##
## Family: gaussian
## Link function: identity
##
## Formula:
## value ~ sex + site + s(bl_age, k = 10, bs = "cr") + s(bl_age,
##   by = sleep_z, bs = "cr") + s(bl_age, by = time, k = 5, bs = "cr") +
##   s(sleep_z, by = time, k = 5, bs = "cr", pc = 0)
## <environment: 0x563006cee588>
##
## Parametric coefficients:
##               Estimate Std. Error t value Pr(>|t|)
## (Intercept)  115801.2    712.2  162.585 < 2e-16 ***
## sexmale      13835.3     366.9   37.707 < 2e-16 ***
## siteousAvanto  7487.2     949.1    7.889 3.45e-15 ***
## siteousPrisma 13287.7    2443.6    5.438 5.55e-08 ***
## siteousSkyra  11115.2     948.3   11.721 < 2e-16 ***
## siteUB        4556.7    1958.1    2.327  0.02 *
## siteUCAM      6448.6     992.7    6.496 8.72e-11 ***
## siteUKB       15442.9     706.5   21.859 < 2e-16 ***
## siteUmU       8974.2    1195.8    7.504 6.82e-14 ***
## ---
## Signif. codes:  0 '***' 0.001 '**' 0.01 '*' 0.05 '.' 0.1 ' ' 1
```

```
##
## Approximate significance of smooth terms:
##           edf Ref.df      F p-value
## s(bl_age)      1.000  1.000 759.346 <2e-16 ***
## s(bl_age):sleep_z 3.237  3.237  1.829  0.0953 .
## s(bl_age):time  3.555  3.555 195.093 <2e-16 ***
## s(sleep_z):time  1.000  1.000  0.227  0.6338
## ---
## Signif. codes:  0 '***' 0.001 '**' 0.01 '*' 0.05 '.' 0.1 ' ' 1
##
## R-sq.(adj) =  0.397
## lmer.REML = 1.6727e+05  Scale est. = 8.696e+06  n = 8180
```

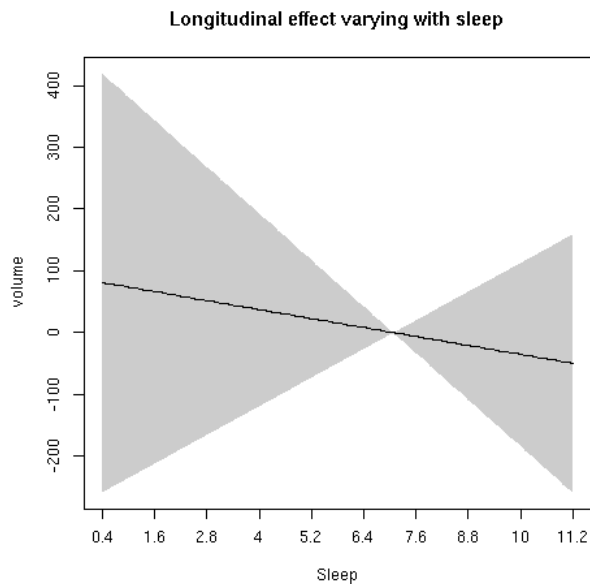

### Participants sleeping 5-9 hours

```
##
## Family: gaussian
## Link function: identity
##
## Formula:
## value ~ sex + site + s(bl_age, k = 10, bs = "cr") + s(bl_age,
##   by = sleep_z, bs = "cr") + s(bl_age, by = time, k = 5, bs = "cr") +
##   s(sleep_z, by = time, k = 5, bs = "cr", pc = 0)
## <environment: 0x563006cee588>
##
## Parametric coefficients:
##           Estimate Std. Error t value Pr(>|t|)
## (Intercept) 115801.2     712.2 162.585 < 2e-16 ***
## sexmale      13835.3     366.9  37.707 < 2e-16 ***
## siteousAvanto 7487.2     949.1   7.889 3.45e-15 ***
## siteousPrisma 13287.7    2443.6   5.438 5.55e-08 ***
## siteousSkyra 11115.2     948.3  11.721 < 2e-16 ***
## siteUB       4556.7    1958.1   2.327  0.02 *
```

```

## siteUCAM          6448.6      992.7   6.496 8.72e-11 ***
## siteUKB           15442.9     706.5  21.859 < 2e-16 ***
## siteUmU           8974.2     1195.8   7.504 6.82e-14 ***
## ---
## Signif. codes:  0 '***' 0.001 '**' 0.01 '*' 0.05 '.' 0.1 ' ' 1
##
## Approximate significance of smooth terms:
##              edf Ref.df      F p-value
## s(bl_age)      1.000  1.000 759.346 <2e-16 ***
## s(bl_age):sleep_z 3.237  3.237   1.829  0.0953 .
## s(bl_age):time  3.555  3.555 195.093 <2e-16 ***
## s(sleep_z):time  1.000  1.000   0.227  0.6338
## ---
## Signif. codes:  0 '***' 0.001 '**' 0.01 '*' 0.05 '.' 0.1 ' ' 1
##
## R-sq.(adj) =  0.397
## lmer.REML = 1.6727e+05  Scale est. = 8.696e+06  n = 8180

```

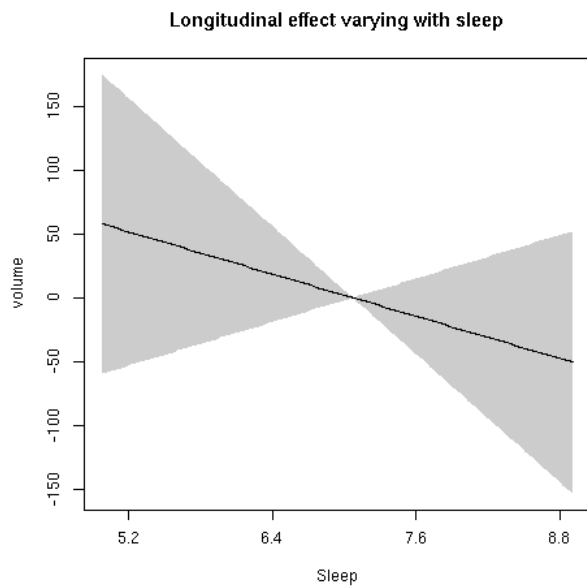

### Area cluster 3

#### All longitudinal data

```

##
## Family: gaussian
## Link function: identity
##
## Formula:
## value ~ sex + site + s(bl_age, k = 10, bs = "cr") + s(bl_age,
##   by = sleep_z, bs = "cr") + s(bl_age, by = time, k = 5, bs = "cr") +
##   s(sleep_z, by = time, k = 5, bs = "cr", pc = 0)
## <environment: 0x563034333450>
##
## Parametric coefficients:

```

```

##           Estimate Std. Error t value Pr(>|t|)
## (Intercept) 101688.9    554.9 183.271 < 2e-16 ***
## sexmale     11622.1     286.0  40.639 < 2e-16 ***
## siteousAvanto 7079.8     736.5   9.612 < 2e-16 ***
## siteousPrisma 5695.3    1554.0   3.665 0.000249 ***
## siteousSkyra  5441.0     736.2   7.391 1.60e-13 ***
## siteUB       -328.8    1528.8  -0.215 0.829736
## siteUCAM     3201.0     773.4   4.139 3.52e-05 ***
## siteUKB      1263.7     550.4   2.296 0.021698 *
## siteUmU      5965.9     931.9   6.402 1.62e-10 ***
## ---
## Signif. codes:  0 '***' 0.001 '**' 0.01 '*' 0.05 '.' 0.1 ' ' 1
##
## Approximate significance of smooth terms:
##           edf Ref.df      F p-value
## s(bl_age)      1.000  1.000 221.086 <2e-16 ***
## s(bl_age):sleep_z 2.805  2.805   1.622   0.120
## s(bl_age):time  2.000  2.000 146.794 <2e-16 ***
## s(sleep_z):time 1.000  1.000   0.827   0.363
## ---
## Signif. codes:  0 '***' 0.001 '**' 0.01 '*' 0.05 '.' 0.1 ' ' 1
##
## R-sq.(adj) =  0.343
## lmer.REML = 1.6102e+05  Scale est. = 3.1807e+06  n = 8180

```

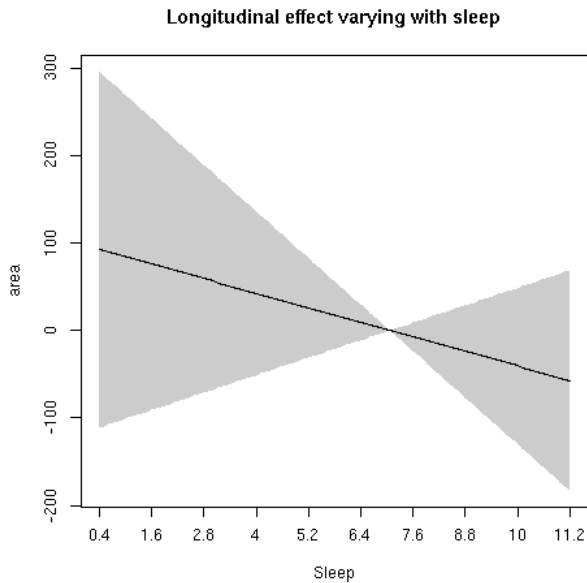

### Participants sleeping 5-9 hours

```

##
## Family: gaussian
## Link function: identity
##
## Formula:
## value ~ sex + site + s(bl_age, k = 10, bs = "cr") + s(bl_age,

```

```

##      by = sleep_z, bs = "cr") + +s(bl_age, by = time, k = 5, bs = "cr") +
##      s(sleep_z, by = time, k = 5, bs = "cr", pc = 0)
## <environment: 0x563034333450>
##
## Parametric coefficients:
##           Estimate Std. Error t value Pr(>|t|)
## (Intercept) 101688.9     554.9 183.271 < 2e-16 ***
## sexmale      11622.1     286.0  40.639 < 2e-16 ***
## siteousAvanto 7079.8     736.5   9.612 < 2e-16 ***
## siteousPrisma 5695.3    1554.0   3.665 0.000249 ***
## siteousSkyra  5441.0     736.2   7.391 1.60e-13 ***
## siteUB       -328.8    1528.8  -0.215 0.829736
## siteUCAM     3201.0     773.4   4.139 3.52e-05 ***
## siteUKB      1263.7     550.4   2.296 0.021698 *
## siteUmU      5965.9     931.9   6.402 1.62e-10 ***
## ---
## Signif. codes:  0 '***' 0.001 '**' 0.01 '*' 0.05 '.' 0.1 ' ' 1
##
## Approximate significance of smooth terms:
##           edf Ref.df      F p-value
## s(bl_age)      1.000  1.000 221.086 <2e-16 ***
## s(bl_age):sleep_z 2.805  2.805   1.622   0.120
## s(bl_age):time  2.000  2.000 146.794 <2e-16 ***
## s(sleep_z):time  1.000  1.000   0.827   0.363
## ---
## Signif. codes:  0 '***' 0.001 '**' 0.01 '*' 0.05 '.' 0.1 ' ' 1
##
## R-sq.(adj) = 0.343
## lmer.REML = 1.6102e+05  Scale est. = 3.1807e+06  n = 8180

```

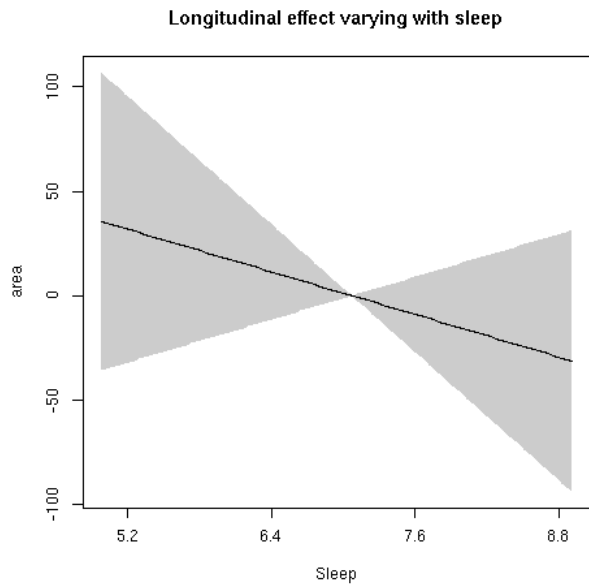

### Thickness cluster 3

#### All longitudinal data

```
##
## Family: gaussian
## Link function: identity
##
## Formula:
## value ~ sex + site + s(bl_age, k = 10, bs = "cr") + s(bl_age,
##   by = sleep_z, bs = "cr") + s(bl_age, by = time, k = 5, bs = "cr") +
##   s(sleep_z, by = time, k = 5, bs = "cr", pc = 0)
## <environment: 0x5630074621f0>
##
## Parametric coefficients:
##           Estimate Std. Error t value Pr(>|t|)
## (Intercept)  2.542424   0.005926  429.016 < 2e-16 ***
## sexmale      -0.001732   0.003042  -0.569  0.569054
## siteousAvanto -0.009717   0.008089  -1.201  0.229727
## siteousPrisma  0.054343   0.036952   1.471  0.141424
## siteousSkyra  0.001682   0.008069   0.208  0.834898
## siteUB        0.062181   0.016031   3.879  0.000106 ***
## siteUCAM      0.029428   0.008240   3.571  0.000357 ***
## siteUKB       0.284573   0.005872  48.463 < 2e-16 ***
## siteUmU       0.015502   0.009937   1.560  0.118806
## ---
## Signif. codes:  0 '***' 0.001 '**' 0.01 '*' 0.05 '.' 0.1 ' ' 1
##
## Approximate significance of smooth terms:
##           edf Ref.df      F p-value
## s(bl_age)      1.000  1.000 482.425 <2e-16 ***
## s(bl_age):sleep_z 2.000  2.000   0.655  0.520
## s(bl_age):time  3.052  3.052  81.066 <2e-16 ***
## s(sleep_z):time  1.000  1.000   0.131  0.718
## ---
## Signif. codes:  0 '***' 0.001 '**' 0.01 '*' 0.05 '.' 0.1 ' ' 1
##
## R-sq.(adj) =  0.616
## lmer.REML = -18210  Scale est. = 0.0023948  n = 8178
```

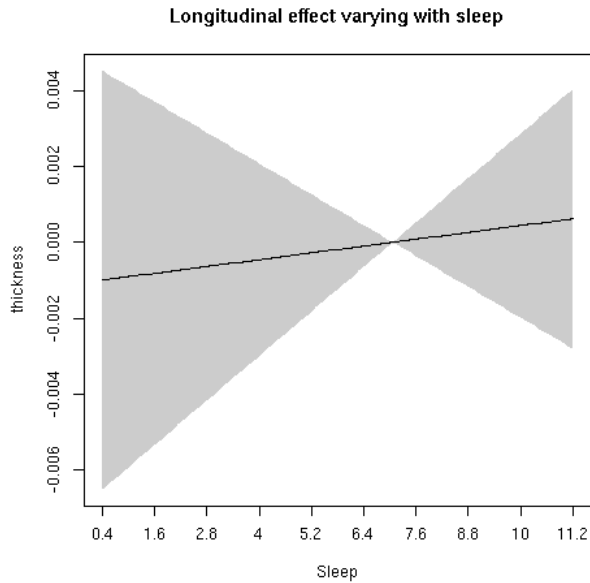

### Participants sleeping 5-9 hours

```
##
## Family: gaussian
## Link function: identity
##
## Formula:
## value ~ sex + site + s(bl_age, k = 10, bs = "cr") + s(bl_age,
##   by = sleep_z, bs = "cr") + s(bl_age, by = time, k = 5, bs = "cr") +
##   s(sleep_z, by = time, k = 5, bs = "cr", pc = 0)
## <environment: 0x5630074621f0>
##
## Parametric coefficients:
##               Estimate Std. Error t value Pr(>|t|)
## (Intercept)  2.542424  0.005926  429.016 < 2e-16 ***
## sexmale      -0.001732  0.003042  -0.569  0.569054
## siteousAvanto -0.009717  0.008089  -1.201  0.229727
## siteousPrisma  0.054343  0.036952   1.471  0.141424
## siteousSkyra   0.001682  0.008069   0.208  0.834898
## siteUB        0.062181  0.016031   3.879  0.000106 ***
## siteUCAM      0.029428  0.008240   3.571  0.000357 ***
## siteUKB       0.284573  0.005872  48.463 < 2e-16 ***
## siteUmU       0.015502  0.009937   1.560  0.118806
## ---
## Signif. codes:  0 '***' 0.001 '**' 0.01 '*' 0.05 '.' 0.1 ' ' 1
##
## Approximate significance of smooth terms:
##               edf Ref.df      F p-value
## s(bl_age)      1.000  1.000 482.425 <2e-16 ***
## s(bl_age):sleep_z 2.000  2.000   0.655  0.520
## s(bl_age):time  3.052  3.052  81.066 <2e-16 ***
## s(sleep_z):time  1.000  1.000   0.131  0.718
```



```
## ---
## Signif. codes:  0 '***' 0.001 '**' 0.01 '*' 0.05 '.' 0.1 ' ' 1
##
## R-sq.(adj) =  0.616
## lmer.REML = -18210  Scale est. = 0.0023948  n = 8178
```

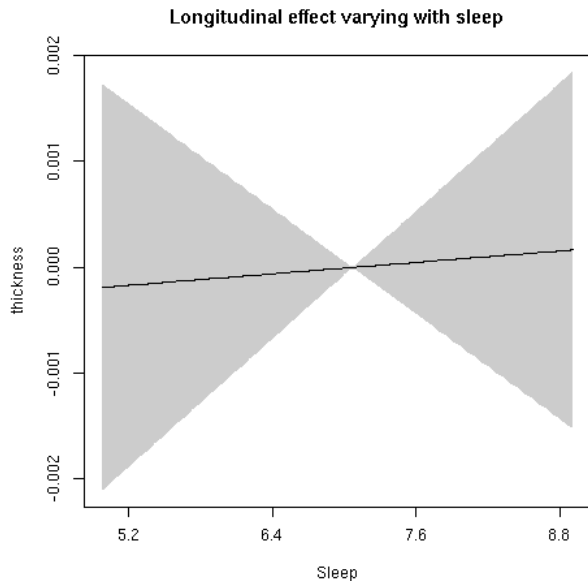

## Volume cluster 3

### All longitudinal data

```
##
## Family: gaussian
## Link function: identity
##
## Formula:
## value ~ sex + site + s(bl_age, k = 10, bs = "cr") + s(bl_age,
##   by = sleep_z, bs = "cr") + s(bl_age, by = time, k = 5, bs = "cr") +
##   s(sleep_z, by = time, k = 5, bs = "cr", pc = 0)
## <environment: 0x56300419f738>
##
## Parametric coefficients:
##               Estimate Std. Error t value Pr(>|t|)
## (Intercept)   91602.8     584.4 156.755 < 2e-16 ***
## sexmale       10693.6     298.6  35.809 < 2e-16 ***
## siteousAvanto  5076.1     772.5   6.571 5.30e-11 ***
## siteousPrisma 11108.1    1971.6   5.634 1.82e-08 ***
## siteousSkyra   6876.6     772.0   8.907 < 2e-16 ***
## siteUB         2323.4    1594.8   1.457  0.145
## siteUCAM       4655.6     808.3   5.759 8.74e-09 ***
## siteUKB       12056.3     584.1  20.639 < 2e-16 ***
## siteUmU        5853.0     975.7   5.999 2.07e-09 ***
## ---
## Signif. codes:  0 '***' 0.001 '**' 0.01 '*' 0.05 '.' 0.1 ' ' 1
```

```
##
## Approximate significance of smooth terms:
##           edf Ref.df      F p-value
## s(bl_age)      1.434  1.434 437.154 <2e-16 ***
## s(bl_age):sleep_z 2.243  2.243   2.005   0.108
## s(bl_age):time  3.729  3.729 197.411 <2e-16 ***
## s(sleep_z):time  1.000  1.000   0.067   0.796
## ---
## Signif. codes:  0 '***' 0.001 '**' 0.01 '*' 0.05 '.' 0.1 ' ' 1
##
## R-sq.(adj) =  0.381
## lmer.REML = 1.6377e+05  Scale est. = 5.6397e+06  n = 8178
```

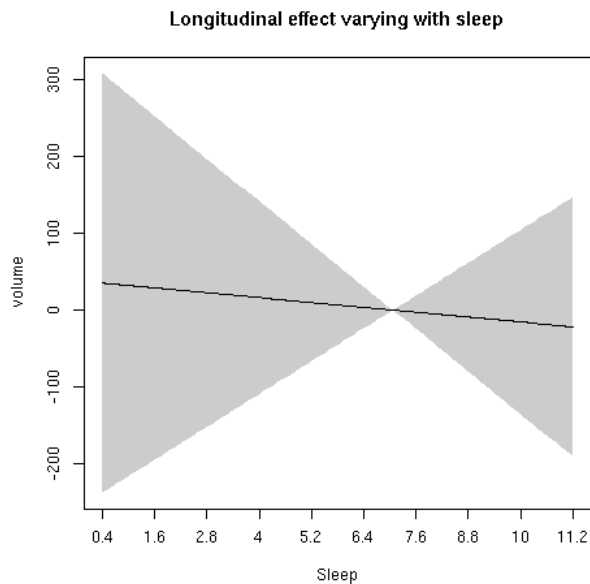

### Participants sleeping 5-9 hours

```
##
## Family: gaussian
## Link function: identity
##
## Formula:
## value ~ sex + site + s(bl_age, k = 10, bs = "cr") + s(bl_age,
##   by = sleep_z, bs = "cr") + s(bl_age, by = time, k = 5, bs = "cr") +
##   s(sleep_z, by = time, k = 5, bs = "cr", pc = 0)
## <environment: 0x56300419f738>
##
## Parametric coefficients:
##           Estimate Std. Error t value Pr(>|t|)
## (Intercept)  91602.8     584.4 156.755 < 2e-16 ***
## sexmale      10693.6     298.6  35.809 < 2e-16 ***
## siteousAvanto  5076.1     772.5   6.571 5.30e-11 ***
## siteousPrisma 11108.1    1971.6   5.634 1.82e-08 ***
## siteousSkyra  6876.6     772.0   8.907 < 2e-16 ***
## siteUB       2323.4    1594.8   1.457  0.145
```

```

## siteUCAM      4655.6      808.3   5.759 8.74e-09 ***
## siteUKB      12056.3     584.1  20.639 < 2e-16 ***
## siteUmU      5853.0     975.7   5.999 2.07e-09 ***
## ---
## Signif. codes:  0 '***' 0.001 '**' 0.01 '*' 0.05 '.' 0.1 ' ' 1
##
## Approximate significance of smooth terms:
##              edf Ref.df      F p-value
## s(bl_age)    1.434  1.434 437.154 <2e-16 ***
## s(bl_age):sleep_z 2.243  2.243   2.005   0.108
## s(bl_age):time 3.729  3.729 197.411 <2e-16 ***
## s(sleep_z):time 1.000  1.000   0.067   0.796
## ---
## Signif. codes:  0 '***' 0.001 '**' 0.01 '*' 0.05 '.' 0.1 ' ' 1
##
## R-sq.(adj) =  0.381
## lmer.REML = 1.6377e+05  Scale est. = 5.6397e+06  n = 8178

```

Longitudinal effect varying with sleep

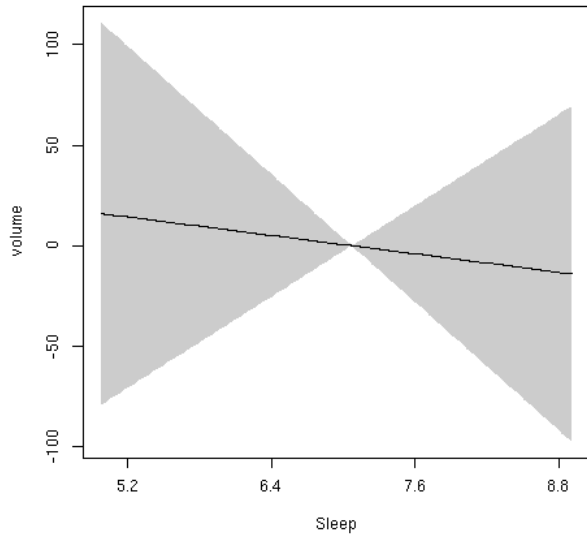

# Subcortical volumes longitudinal

## Contents

|                                                           |          |
|-----------------------------------------------------------|----------|
| <b>Introduction</b>                                       | <b>7</b> |
| Data . . . . .                                            | 7        |
| Models . . . . .                                          | 7        |
| <b>Results per region</b>                                 | <b>8</b> |
| Accumbens-area . . . . .                                  | 8        |
| Main analysis . . . . .                                   | 8        |
| Full data . . . . .                                       | 8        |
| Restricted to sleep $\geq 5$ and $\leq 9$ hours . . . . . | 9        |
| Controlling for socioeconomic status . . . . .            | 10       |
| Full data . . . . .                                       | 10       |
| Restricted to sleep $\geq 5$ and $\leq 9$ hours . . . . . | 12       |
| Controlling for BMI . . . . .                             | 13       |
| Full data . . . . .                                       | 13       |
| Restricted to sleep $\geq 5$ and $\leq 9$ hours . . . . . | 15       |
| Controlling for depression . . . . .                      | 16       |
| Full data . . . . .                                       | 16       |
| Restricted to sleep $\geq 5$ and $\leq 9$ hours . . . . . | 18       |
| Controlling for sleep quality . . . . .                   | 19       |
| Full data . . . . .                                       | 19       |
| Restricted to sleep $\geq 5$ and $\leq 9$ hours . . . . . | 21       |
| Amygdala . . . . .                                        | 22       |
| Main analysis . . . . .                                   | 22       |
| Full data . . . . .                                       | 22       |
| Restricted to sleep $\geq 5$ and $\leq 9$ hours . . . . . | 24       |
| Controlling for socioeconomic status . . . . .            | 25       |
| Full data . . . . .                                       | 25       |
| Restricted to sleep $\geq 5$ and $\leq 9$ hours . . . . . | 27       |
| Controlling for BMI . . . . .                             | 28       |
| Full data . . . . .                                       | 28       |
| Restricted to sleep $\geq 5$ and $\leq 9$ hours . . . . . | 30       |
| Controlling for depression . . . . .                      | 31       |
| Full data . . . . .                                       | 31       |
| Restricted to sleep $\geq 5$ and $\leq 9$ hours . . . . . | 33       |
| Controlling for sleep quality . . . . .                   | 34       |
| Full data . . . . .                                       | 34       |
| Restricted to sleep $\geq 5$ and $\leq 9$ hours . . . . . | 36       |
| Brain-Stem . . . . .                                      | 37       |
| Main analysis . . . . .                                   | 37       |
| Full data . . . . .                                       | 37       |
| Restricted to sleep $\geq 5$ and $\leq 9$ hours . . . . . | 39       |
| Controlling for socioeconomic status . . . . .            | 40       |
| Full data . . . . .                                       | 40       |
| Restricted to sleep $\geq 5$ and $\leq 9$ hours . . . . . | 42       |

|                                                           |    |
|-----------------------------------------------------------|----|
| Controlling for BMI . . . . .                             | 43 |
| Full data . . . . .                                       | 43 |
| Restricted to sleep $\geq 5$ and $\leq 9$ hours . . . . . | 45 |
| Controlling for depression . . . . .                      | 46 |
| Full data . . . . .                                       | 46 |
| Restricted to sleep $\geq 5$ and $\leq 9$ hours . . . . . | 48 |
| Controlling for sleep quality . . . . .                   | 49 |
| Full data . . . . .                                       | 49 |
| Restricted to sleep $\geq 5$ and $\leq 9$ hours . . . . . | 51 |
| Caudate . . . . .                                         | 52 |
| Main analysis . . . . .                                   | 52 |
| Full data . . . . .                                       | 52 |
| Restricted to sleep $\geq 5$ and $\leq 9$ hours . . . . . | 54 |
| Controlling for socioeconomic status . . . . .            | 55 |
| Full data . . . . .                                       | 55 |
| Restricted to sleep $\geq 5$ and $\leq 9$ hours . . . . . | 57 |
| Controlling for BMI . . . . .                             | 58 |
| Full data . . . . .                                       | 58 |
| Restricted to sleep $\geq 5$ and $\leq 9$ hours . . . . . | 60 |
| Controlling for depression . . . . .                      | 61 |
| Full data . . . . .                                       | 61 |
| Restricted to sleep $\geq 5$ and $\leq 9$ hours . . . . . | 63 |
| Controlling for sleep quality . . . . .                   | 64 |
| Full data . . . . .                                       | 64 |
| Restricted to sleep $\geq 5$ and $\leq 9$ hours . . . . . | 66 |
| CC_Anterior . . . . .                                     | 67 |
| Main analysis . . . . .                                   | 67 |
| Full data . . . . .                                       | 67 |
| Restricted to sleep $\geq 5$ and $\leq 9$ hours . . . . . | 69 |
| Controlling for socioeconomic status . . . . .            | 70 |
| Full data . . . . .                                       | 70 |
| Restricted to sleep $\geq 5$ and $\leq 9$ hours . . . . . | 72 |
| Controlling for BMI . . . . .                             | 73 |
| Full data . . . . .                                       | 73 |
| Restricted to sleep $\geq 5$ and $\leq 9$ hours . . . . . | 75 |
| Controlling for depression . . . . .                      | 76 |
| Full data . . . . .                                       | 76 |
| Restricted to sleep $\geq 5$ and $\leq 9$ hours . . . . . | 78 |
| Controlling for sleep quality . . . . .                   | 79 |
| Full data . . . . .                                       | 79 |
| Restricted to sleep $\geq 5$ and $\leq 9$ hours . . . . . | 81 |
| CC_Central . . . . .                                      | 82 |
| Main analysis . . . . .                                   | 82 |
| Full data . . . . .                                       | 82 |
| Restricted to sleep $\geq 5$ and $\leq 9$ hours . . . . . | 84 |
| Controlling for socioeconomic status . . . . .            | 85 |
| Full data . . . . .                                       | 85 |
| Restricted to sleep $\geq 5$ and $\leq 9$ hours . . . . . | 87 |
| Controlling for BMI . . . . .                             | 88 |
| Full data . . . . .                                       | 88 |
| Restricted to sleep $\geq 5$ and $\leq 9$ hours . . . . . | 90 |
| Controlling for depression . . . . .                      | 91 |
| Full data . . . . .                                       | 91 |
| Restricted to sleep $\geq 5$ and $\leq 9$ hours . . . . . | 93 |

|                                                           |     |
|-----------------------------------------------------------|-----|
| Controlling for sleep quality . . . . .                   | 94  |
| Full data . . . . .                                       | 94  |
| Restricted to sleep $\geq 5$ and $\leq 9$ hours . . . . . | 96  |
| CC_Mid_Anterior . . . . .                                 | 97  |
| Main analysis . . . . .                                   | 97  |
| Full data . . . . .                                       | 97  |
| Restricted to sleep $\geq 5$ and $\leq 9$ hours . . . . . | 99  |
| Controlling for socioeconomic status . . . . .            | 100 |
| Full data . . . . .                                       | 100 |
| Restricted to sleep $\geq 5$ and $\leq 9$ hours . . . . . | 102 |
| Controlling for BMI . . . . .                             | 103 |
| Full data . . . . .                                       | 103 |
| Restricted to sleep $\geq 5$ and $\leq 9$ hours . . . . . | 105 |
| Controlling for depression . . . . .                      | 106 |
| Full data . . . . .                                       | 106 |
| Restricted to sleep $\geq 5$ and $\leq 9$ hours . . . . . | 108 |
| Controlling for sleep quality . . . . .                   | 109 |
| Full data . . . . .                                       | 109 |
| Restricted to sleep $\geq 5$ and $\leq 9$ hours . . . . . | 111 |
| CC_Mid_Posterior . . . . .                                | 112 |
| Main analysis . . . . .                                   | 112 |
| Full data . . . . .                                       | 112 |
| Restricted to sleep $\geq 5$ and $\leq 9$ hours . . . . . | 114 |
| Controlling for socioeconomic status . . . . .            | 115 |
| Full data . . . . .                                       | 115 |
| Restricted to sleep $\geq 5$ and $\leq 9$ hours . . . . . | 117 |
| Controlling for BMI . . . . .                             | 118 |
| Full data . . . . .                                       | 118 |
| Restricted to sleep $\geq 5$ and $\leq 9$ hours . . . . . | 120 |
| Controlling for depression . . . . .                      | 121 |
| Full data . . . . .                                       | 121 |
| Restricted to sleep $\geq 5$ and $\leq 9$ hours . . . . . | 123 |
| Controlling for sleep quality . . . . .                   | 124 |
| Full data . . . . .                                       | 124 |
| Restricted to sleep $\geq 5$ and $\leq 9$ hours . . . . . | 126 |
| CC_Posterior . . . . .                                    | 127 |
| Main analysis . . . . .                                   | 127 |
| Full data . . . . .                                       | 127 |
| Restricted to sleep $\geq 5$ and $\leq 9$ hours . . . . . | 129 |
| Controlling for socioeconomic status . . . . .            | 130 |
| Full data . . . . .                                       | 130 |
| Restricted to sleep $\geq 5$ and $\leq 9$ hours . . . . . | 132 |
| Controlling for BMI . . . . .                             | 133 |
| Full data . . . . .                                       | 133 |
| Restricted to sleep $\geq 5$ and $\leq 9$ hours . . . . . | 135 |
| Controlling for depression . . . . .                      | 136 |
| Full data . . . . .                                       | 136 |
| Restricted to sleep $\geq 5$ and $\leq 9$ hours . . . . . | 138 |
| Controlling for sleep quality . . . . .                   | 139 |
| Full data . . . . .                                       | 139 |
| Restricted to sleep $\geq 5$ and $\leq 9$ hours . . . . . | 141 |
| Cerebellum-Cortex . . . . .                               | 142 |
| Main analysis . . . . .                                   | 142 |
| Full data . . . . .                                       | 142 |

|                                                           |     |
|-----------------------------------------------------------|-----|
| Restricted to sleep $\geq 5$ and $\leq 9$ hours . . . . . | 144 |
| Controlling for socioeconomic status . . . . .            | 145 |
| Full data . . . . .                                       | 145 |
| Restricted to sleep $\geq 5$ and $\leq 9$ hours . . . . . | 147 |
| Controlling for BMI . . . . .                             | 148 |
| Full data . . . . .                                       | 148 |
| Restricted to sleep $\geq 5$ and $\leq 9$ hours . . . . . | 150 |
| Controlling for depression . . . . .                      | 151 |
| Full data . . . . .                                       | 151 |
| Restricted to sleep $\geq 5$ and $\leq 9$ hours . . . . . | 153 |
| Controlling for sleep quality . . . . .                   | 154 |
| Full data . . . . .                                       | 154 |
| Restricted to sleep $\geq 5$ and $\leq 9$ hours . . . . . | 156 |
| Cerebellum-White-Matter . . . . .                         | 157 |
| Main analysis . . . . .                                   | 157 |
| Full data . . . . .                                       | 157 |
| Restricted to sleep $\geq 5$ and $\leq 9$ hours . . . . . | 159 |
| Controlling for socioeconomic status . . . . .            | 160 |
| Full data . . . . .                                       | 160 |
| Restricted to sleep $\geq 5$ and $\leq 9$ hours . . . . . | 162 |
| Controlling for BMI . . . . .                             | 163 |
| Full data . . . . .                                       | 163 |
| Restricted to sleep $\geq 5$ and $\leq 9$ hours . . . . . | 165 |
| Controlling for depression . . . . .                      | 166 |
| Full data . . . . .                                       | 166 |
| Restricted to sleep $\geq 5$ and $\leq 9$ hours . . . . . | 168 |
| Controlling for sleep quality . . . . .                   | 169 |
| Full data . . . . .                                       | 169 |
| Restricted to sleep $\geq 5$ and $\leq 9$ hours . . . . . | 171 |
| CerebralWhiteMatterVol . . . . .                          | 172 |
| Main analysis . . . . .                                   | 172 |
| Full data . . . . .                                       | 172 |
| Restricted to sleep $\geq 5$ and $\leq 9$ hours . . . . . | 174 |
| Controlling for socioeconomic status . . . . .            | 175 |
| Full data . . . . .                                       | 175 |
| Restricted to sleep $\geq 5$ and $\leq 9$ hours . . . . . | 177 |
| Controlling for BMI . . . . .                             | 178 |
| Full data . . . . .                                       | 178 |
| Restricted to sleep $\geq 5$ and $\leq 9$ hours . . . . . | 180 |
| Controlling for depression . . . . .                      | 181 |
| Full data . . . . .                                       | 181 |
| Restricted to sleep $\geq 5$ and $\leq 9$ hours . . . . . | 183 |
| Controlling for sleep quality . . . . .                   | 184 |
| Full data . . . . .                                       | 184 |
| Restricted to sleep $\geq 5$ and $\leq 9$ hours . . . . . | 186 |
| EstimatedTotalIntraCranialVol . . . . .                   | 187 |
| Main analysis . . . . .                                   | 187 |
| Full data . . . . .                                       | 187 |
| Restricted to sleep $\geq 5$ and $\leq 9$ hours . . . . . | 189 |
| Controlling for socioeconomic status . . . . .            | 190 |
| Full data . . . . .                                       | 190 |
| Restricted to sleep $\geq 5$ and $\leq 9$ hours . . . . . | 192 |
| Controlling for BMI . . . . .                             | 193 |
| Full data . . . . .                                       | 193 |

|                                                           |     |
|-----------------------------------------------------------|-----|
| Restricted to sleep $\geq 5$ and $\leq 9$ hours . . . . . | 195 |
| Controlling for depression . . . . .                      | 196 |
| Full data . . . . .                                       | 196 |
| Restricted to sleep $\geq 5$ and $\leq 9$ hours . . . . . | 198 |
| Controlling for sleep quality . . . . .                   | 199 |
| Full data . . . . .                                       | 199 |
| Restricted to sleep $\geq 5$ and $\leq 9$ hours . . . . . | 201 |
| Hippocampus . . . . .                                     | 202 |
| Main analysis . . . . .                                   | 202 |
| Full data . . . . .                                       | 202 |
| Restricted to sleep $\geq 5$ and $\leq 9$ hours . . . . . | 204 |
| Controlling for socioeconomic status . . . . .            | 205 |
| Full data . . . . .                                       | 205 |
| Restricted to sleep $\geq 5$ and $\leq 9$ hours . . . . . | 207 |
| Controlling for BMI . . . . .                             | 208 |
| Full data . . . . .                                       | 208 |
| Restricted to sleep $\geq 5$ and $\leq 9$ hours . . . . . | 210 |
| Controlling for depression . . . . .                      | 211 |
| Full data . . . . .                                       | 211 |
| Restricted to sleep $\geq 5$ and $\leq 9$ hours . . . . . | 213 |
| Controlling for sleep quality . . . . .                   | 214 |
| Full data . . . . .                                       | 214 |
| Restricted to sleep $\geq 5$ and $\leq 9$ hours . . . . . | 216 |
| Pallidum . . . . .                                        | 217 |
| Main analysis . . . . .                                   | 217 |
| Full data . . . . .                                       | 217 |
| Restricted to sleep $\geq 5$ and $\leq 9$ hours . . . . . | 219 |
| Controlling for socioeconomic status . . . . .            | 220 |
| Full data . . . . .                                       | 220 |
| Restricted to sleep $\geq 5$ and $\leq 9$ hours . . . . . | 222 |
| Controlling for BMI . . . . .                             | 223 |
| Full data . . . . .                                       | 223 |
| Restricted to sleep $\geq 5$ and $\leq 9$ hours . . . . . | 225 |
| Controlling for depression . . . . .                      | 226 |
| Full data . . . . .                                       | 226 |
| Restricted to sleep $\geq 5$ and $\leq 9$ hours . . . . . | 228 |
| Controlling for sleep quality . . . . .                   | 229 |
| Full data . . . . .                                       | 229 |
| Restricted to sleep $\geq 5$ and $\leq 9$ hours . . . . . | 231 |
| Putamen . . . . .                                         | 232 |
| Main analysis . . . . .                                   | 232 |
| Full data . . . . .                                       | 232 |
| Restricted to sleep $\geq 5$ and $\leq 9$ hours . . . . . | 234 |
| Controlling for socioeconomic status . . . . .            | 235 |
| Full data . . . . .                                       | 235 |
| Restricted to sleep $\geq 5$ and $\leq 9$ hours . . . . . | 237 |
| Controlling for BMI . . . . .                             | 238 |
| Full data . . . . .                                       | 238 |
| Restricted to sleep $\geq 5$ and $\leq 9$ hours . . . . . | 240 |
| Controlling for depression . . . . .                      | 241 |
| Full data . . . . .                                       | 241 |
| Restricted to sleep $\geq 5$ and $\leq 9$ hours . . . . . | 243 |
| Controlling for sleep quality . . . . .                   | 244 |
| Full data . . . . .                                       | 244 |



|                                                           |            |
|-----------------------------------------------------------|------------|
| Restricted to sleep $\geq 5$ and $\leq 9$ hours . . . . . | 246        |
| Thalamus . . . . .                                        | 247        |
| Main analysis . . . . .                                   | 247        |
| Full data . . . . .                                       | 247        |
| Restricted to sleep $\geq 5$ and $\leq 9$ hours . . . . . | 249        |
| Controlling for socioeconomic status . . . . .            | 250        |
| Full data . . . . .                                       | 250        |
| Restricted to sleep $\geq 5$ and $\leq 9$ hours . . . . . | 252        |
| Controlling for BMI . . . . .                             | 253        |
| Full data . . . . .                                       | 253        |
| Restricted to sleep $\geq 5$ and $\leq 9$ hours . . . . . | 255        |
| Controlling for depression . . . . .                      | 256        |
| Full data . . . . .                                       | 256        |
| Restricted to sleep $\geq 5$ and $\leq 9$ hours . . . . . | 258        |
| Controlling for sleep quality . . . . .                   | 259        |
| Full data . . . . .                                       | 259        |
| Restricted to sleep $\geq 5$ and $\leq 9$ hours . . . . . | 261        |
| TotalGrayVol . . . . .                                    | 262        |
| Main analysis . . . . .                                   | 262        |
| Full data . . . . .                                       | 262        |
| Restricted to sleep $\geq 5$ and $\leq 9$ hours . . . . . | 264        |
| Controlling for socioeconomic status . . . . .            | 265        |
| Full data . . . . .                                       | 265        |
| Restricted to sleep $\geq 5$ and $\leq 9$ hours . . . . . | 267        |
| Controlling for BMI . . . . .                             | 268        |
| Full data . . . . .                                       | 268        |
| Restricted to sleep $\geq 5$ and $\leq 9$ hours . . . . . | 270        |
| Controlling for depression . . . . .                      | 271        |
| Full data . . . . .                                       | 271        |
| Restricted to sleep $\geq 5$ and $\leq 9$ hours . . . . . | 273        |
| Controlling for sleep quality . . . . .                   | 274        |
| Full data . . . . .                                       | 274        |
| Restricted to sleep $\geq 5$ and $\leq 9$ hours . . . . . | 276        |
| Ventricles . . . . .                                      | 277        |
| Main analysis . . . . .                                   | 277        |
| Full data . . . . .                                       | 277        |
| Restricted to sleep $\geq 5$ and $\leq 9$ hours . . . . . | 279        |
| Controlling for socioeconomic status . . . . .            | 280        |
| Full data . . . . .                                       | 280        |
| Restricted to sleep $\geq 5$ and $\leq 9$ hours . . . . . | 282        |
| Controlling for BMI . . . . .                             | 283        |
| Full data . . . . .                                       | 283        |
| Restricted to sleep $\geq 5$ and $\leq 9$ hours . . . . . | 285        |
| Controlling for depression . . . . .                      | 286        |
| Full data . . . . .                                       | 286        |
| Restricted to sleep $\geq 5$ and $\leq 9$ hours . . . . . | 288        |
| Controlling for sleep quality . . . . .                   | 289        |
| Full data . . . . .                                       | 289        |
| Restricted to sleep $\geq 5$ and $\leq 9$ hours . . . . . | 291        |
| <b>P-values corrected for multiple testing . . . . .</b>  | <b>292</b> |
| Controlling for quality . . . . .                         | 294        |
| P-values controlling for BMI . . . . .                    | 295        |
| P-values controlling for SES . . . . .                    | 296        |

```
library(tidyverse)
```

## Introduction

### Data

All participants with two or more timepoints were included. A count is shown below.

| study | Participants | Observations |
|-------|--------------|--------------|
| MPIB  | 284          | 568          |
| UB    | 38           | 112          |
| UCAM  | 252          | 504          |
| UiO   | 340          | 1011         |
| UKB   | 2846         | 5692         |
| UmU   | 133          | 266          |

| Max. follow-up | Mean follow-up | SD follow-up |
|----------------|----------------|--------------|
| 11.22656       | 2.510435       | 1.448605     |

### Models

The following GAMM was fitted:

```
mod <- gamm4(
  value ~ sex + site + icv + s(bl_age, k = 10, bs = 'cr') +
    s(bl_age, by = sleep_z, bs = 'cr') +
    s(bl_age, by = time, k = 5, bs = 'cr') +
    s(sleep_z, by = time, k = 5, bs = 'cr', pc = 0),
  random = ~(1|id), data = long_dat, REML = FALSE
)
```

Here is an explanation of each of the smooth terms. The number of “knots” was chosen relatively low for the sake of computational speed, but increasing this would have minimal impact on the results, as the estimated degrees of freedom is well below the maximum provided by the `k`.

- `s(bl_age, k = 10, bs = 'cr')` models the main effect of baseline age. In a linear model, the equivalent would be `bl_age`.
- `s(bl_age, by = sleep_z, bs = 'cr')` models the effect of sleep and how this effect varies with baseline age. In a linear model, the equivalent to this term would be `sleep_z + bl_age:sleep_z`.
- `s(bl_age, by = time, k = 5, bs = 'cr')` models how the effect of time depends on baseline age. In a linear model, the equivalent to this term would be `time + bl_age:time`.
- `s(sleep_z, by = time, k = 5, bs = 'cr', pc = 0)` models the interaction between time and sleep. The argument `pc = 0` constrains this term to not include a main effect of `time`, as this is covered by the previous term. In a linear model, the equivalent to this term would be `sleep_z:time`. This is the term of main interest.

# Results per region

## Accumbens-area

### Main analysis

**Full data** Below is the model output. The term `s(sleep_z):time` is probably what we care most about.

```
##
## Family: gaussian
## Link function: identity
##
## Formula:
## value ~ sex + site + icv + s(bl_age, k = 10, bs = "cr") + s(bl_age,
##   by = sleep_z, bs = "cr") + +s(bl_age, by = time, k = 5, bs = "cr") +
##   s(sleep_z, by = time, k = 5, bs = "cr", pc = 0)
## <environment: 0x56391542fa28>
##
## Parametric coefficients:
##           Estimate Std. Error t value Pr(>|t|)
## (Intercept)   925.987    10.605  87.319 < 2e-16 ***
## sexmale       14.029     5.443   2.577 0.00998 **
## siteousAvanto 114.136    13.087   8.722 < 2e-16 ***
## siteousPrisma -66.977    42.893  -1.561 0.11845
## siteousSkyra  274.062    12.714  21.557 < 2e-16 ***
## siteUB        -24.983    24.241  -1.031 0.30274
## siteUCAM      -100.142    13.242  -7.562 4.39e-14 ***
## siteUKB       -10.489    10.089  -1.040 0.29852
## siteUmU       289.790    15.136  19.145 < 2e-16 ***
## icv           57.456     2.656  21.632 < 2e-16 ***
## ---
## Signif. codes:  0 '***' 0.001 '**' 0.01 '*' 0.05 '.' 0.1 ' ' 1
##
## Approximate significance of smooth terms:
##           edf Ref.df      F p-value
## s(bl_age)      4.34  4.34 490.591 <2e-16 ***
## s(bl_age):sleep_z 2.00  2.00  0.522  0.593
## s(bl_age):time  2.00  2.00 275.339 <2e-16 ***
## s(sleep_z):time  1.00  1.00  0.070  0.791
## ---
## Signif. codes:  0 '***' 0.001 '**' 0.01 '*' 0.05 '.' 0.1 ' ' 1
##
## R-sq.(adj) =  0.58
## lmer.REML = 98394 Scale est. = 2920.6    n = 8153
```

Below are plots of a plot of `s(bl_age)`, `s(bl_age):sleep_z`, `s(bl_age):time`, and `s(sleep_z):time`. For `s(sleep_z):time`, roughly, if we cannot fit a straight line through the confidence bands, there is evidence that the effect of time depends on sleep duration. It is correct that that confidence interval is zero at one point along the axis; this happens because we do not include the main effect.

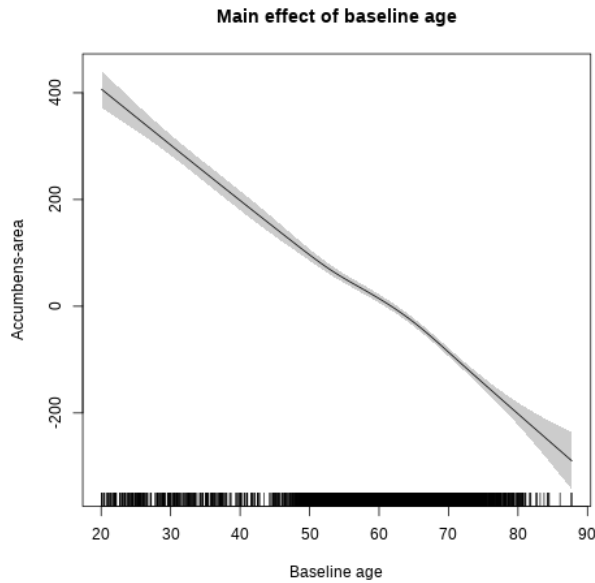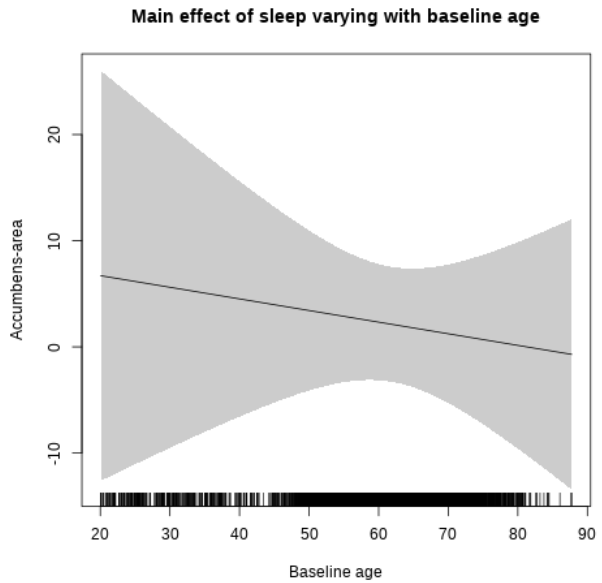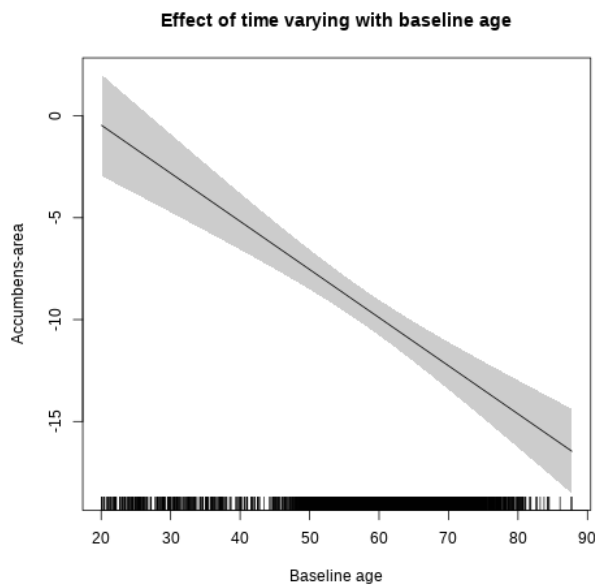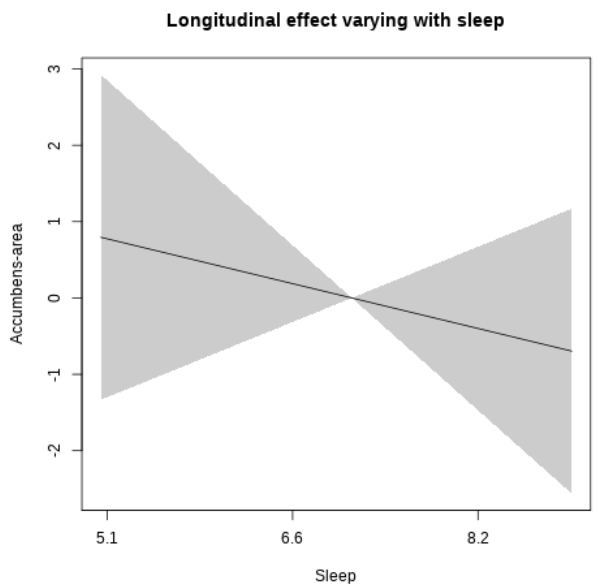

**Restricted to sleep  $\geq 5$  and  $\leq 9$  hours** Below is the row for `s(sleep_z):time` from the model output.

```
## s(sleep_z):time 1.000 1.000 0.557 0.455
```

Below are plots of a plot of `s(bl_age)`, `s(bl_age):sleep_z`, `s(bl_age):time`, and `s(sleep_z):time`. For `s(sleep_z):time`, roughly, if we cannot fit a straight line through the confidence bands, there is evidence that the effect of time depends on sleep duration. It is correct that the confidence interval is zero at one point along the axis; this happens because we do not include the main effect.

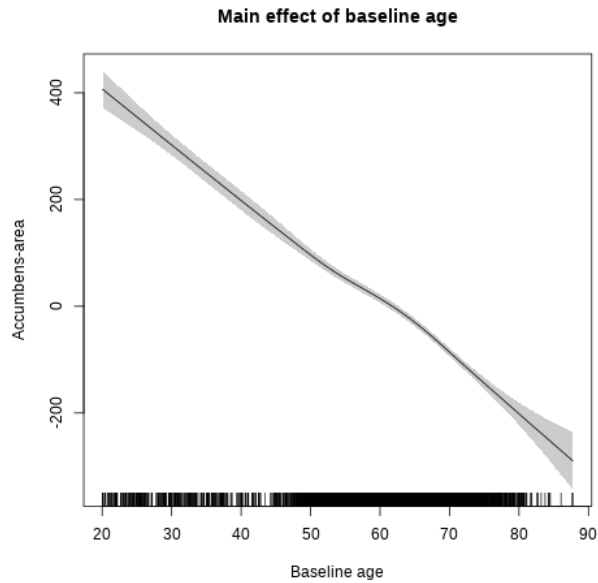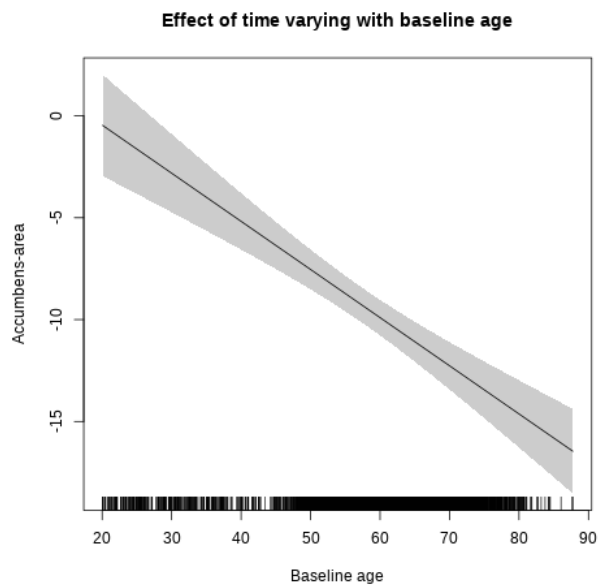

## Controlling for socioeconomic status

**Full data** Below is the model output. The term `s(sleep_z):time` is probably what we care most about.

```
##
## Family: gaussian
## Link function: identity
##
## Formula:
## value ~ sex + site + income_scaled + education_scaled + icv +
##       s(bl_age, k = 10, bs = "cr") + s(bl_age, by = sleep_z, bs = "cr") +
##       +s(bl_age, by = time, k = 5, bs = "cr") + s(sleep_z, by = time,
##       k = 5, bs = "cr", pc = 0)
```

```

## <environment: 0x563911288808>
##
## Parametric coefficients:
##           Estimate Std. Error t value Pr(>|t|)
## (Intercept)   963.363    23.978  40.176 < 2e-16 ***
## sexmale       18.001     6.722   2.678 0.00744 **
## siteousAvanto  64.443    27.362   2.355 0.01855 *
## siteousPrisma -115.147    69.742  -1.651 0.09879 .
## siteousSkyra  257.089    24.708  10.405 < 2e-16 ***
## siteUKB       -60.927    22.548  -2.702 0.00692 **
## income_scaled -3.563     8.180  -0.436 0.66313
## education_scaled 10.484     9.512   1.102 0.27043
## icv           64.532     3.390  19.038 < 2e-16 ***
## ---
## Signif. codes:  0 '***' 0.001 '**' 0.01 '*' 0.05 '.' 0.1 ' ' 1
##
## Approximate significance of smooth terms:
##           edf Ref.df      F p-value
## s(bl_age)      1      1 916.159 <2e-16 ***
## s(bl_age):sleep_z  2      2   1.195 0.3029
## s(bl_age):time    2      2 116.109 <2e-16 ***
## s(sleep_z):time    1      1   2.728 0.0986 .
## ---
## Signif. codes:  0 '***' 0.001 '**' 0.01 '*' 0.05 '.' 0.1 ' ' 1
##
## R-sq.(adj) =  0.589
## lmer.REML = 56008 Scale est. = 2889.7    n = 4654

```

Below are plots of a plot of  $s(\text{bl\_age})$ ,  $s(\text{bl\_age}):\text{sleep\_z}$ ,  $s(\text{bl\_age}):\text{time}$ , and  $s(\text{sleep\_z}):\text{time}$ . For  $s(\text{sleep\_z}):\text{time}$ , roughly, if we cannot fit a straight line through the confidence bands, there is evidence that the effect of time depends on sleep duration. It is correct that the confidence interval is zero at one point along the axis; this happens because we do not include the main effect.

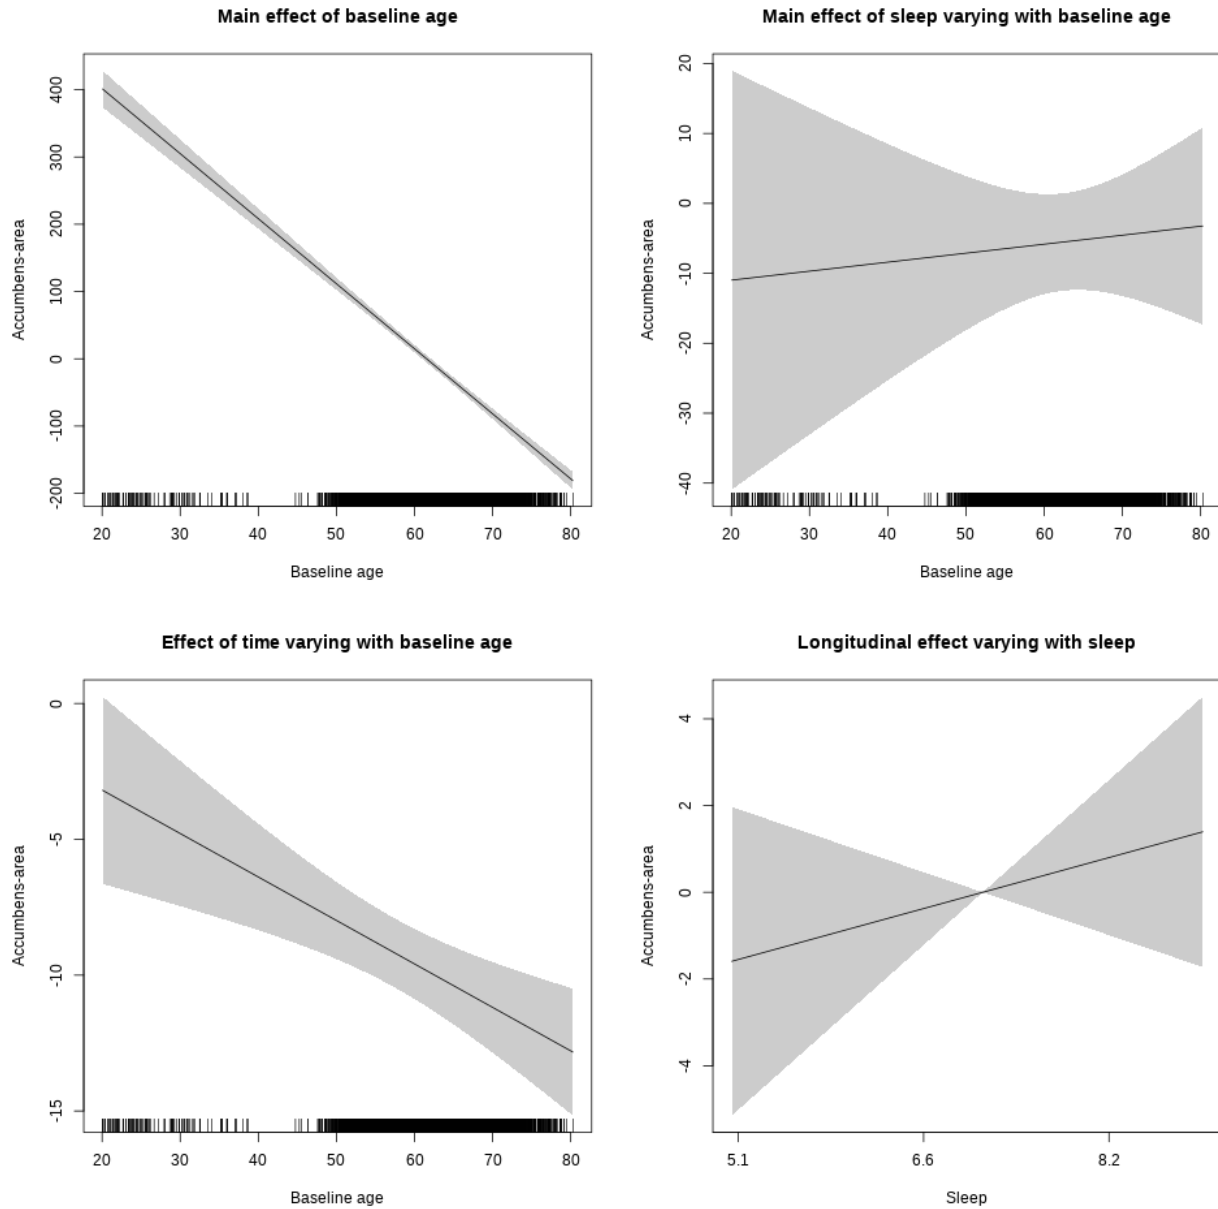

**Restricted to sleep  $\geq 5$  and  $\leq 9$  hours** Below is the row for `s(sleep_z):time` from the model output.

```
## s(sleep_z):time      1      1  0.800  0.371
```

Below are plots of a plot of `s(bl_age)`, `s(bl_age):sleep_z`, `s(bl_age):time`, and `s(sleep_z):time`. For `s(sleep_z):time`, roughly, if we cannot fit a straight line through the confidence bands, there is evidence that the effect of time depends on sleep duration. It is correct that the confidence interval is zero at one point along the axis; this happens because we do not include the main effect.



## Controlling for BMI

**Full data** Below is the model output. The term `s(sleep_z):time` is probably what we care most about.

```
##
## Family: gaussian
## Link function: identity
##
## Formula:
## value ~ sex + site + bmi + icv + s(bl_age, k = 10, bs = "cr") +
##   s(bl_age, by = sleep_z, bs = "cr") + +s(bl_age, by = time,
##     k = 5, bs = "cr") + s(sleep_z, by = time, k = 5, bs = "cr",
##     pc = 0)
```



```

## <environment: 0x563916cde2d8>
##
## Parametric coefficients:
##           Estimate Std. Error t value Pr(>|t|)
## (Intercept) 1023.6533   22.6285  45.237 < 2e-16 ***
## sexmale      17.5180    6.2884   2.786 0.005359 **
## siteousPrisma -153.3027  43.0596  -3.560 0.000374 ***
## siteousSkyra  188.7443   13.4537  14.029 < 2e-16 ***
## siteUCAM     -217.4941  18.2012 -11.949 < 2e-16 ***
## siteUKB      -122.4731  16.5913  -7.382 1.8e-13 ***
## siteUmU      185.1536   20.3144   9.114 < 2e-16 ***
## bmi          0.4684    0.6467   0.724 0.468902
## icv          63.1016    3.1474  20.049 < 2e-16 ***
## ---
## Signif. codes:  0 '***' 0.001 '**' 0.01 '*' 0.05 '.' 0.1 ' ' 1
##
## Approximate significance of smooth terms:
##           edf Ref.df      F p-value
## s(bl_age)      1.000  1.000 1432.161 <2e-16 ***
## s(bl_age):sleep_z 2.000  2.000   0.003  0.997
## s(bl_age):time  2.000  2.000  137.493 <2e-16 ***
## s(sleep_z):time 2.089  2.089   1.012  0.271
## ---
## Signif. codes:  0 '***' 0.001 '**' 0.01 '*' 0.05 '.' 0.1 ' ' 1
##
## R-sq.(adj) =  0.613
## lmer.REML = 65309 Scale est. = 2929.1    n = 5416

```

Below are plots of a plot of `s(bl_age)`, `s(bl_age):sleep_z`, `s(bl_age):time`, and `s(sleep_z):time`. For `s(sleep_z):time`, roughly, if we cannot fit a straight line through the confidence bands, there is evidence that the effect of time depends on sleep duration. It is correct that the confidence interval is zero at one point along the axis; this happens because we do not include the main effect.

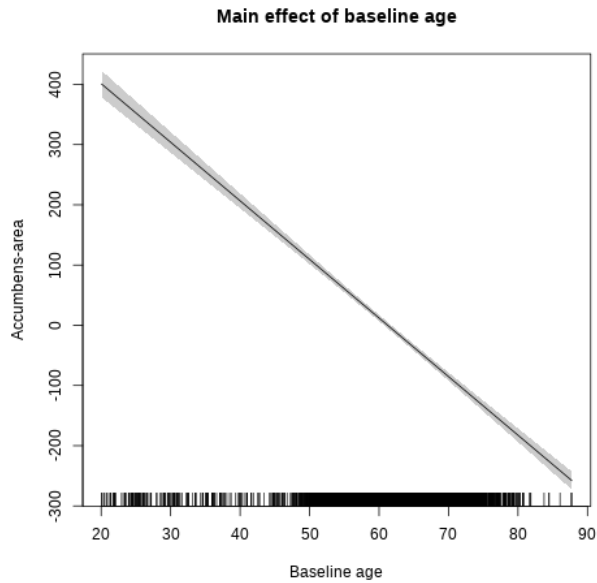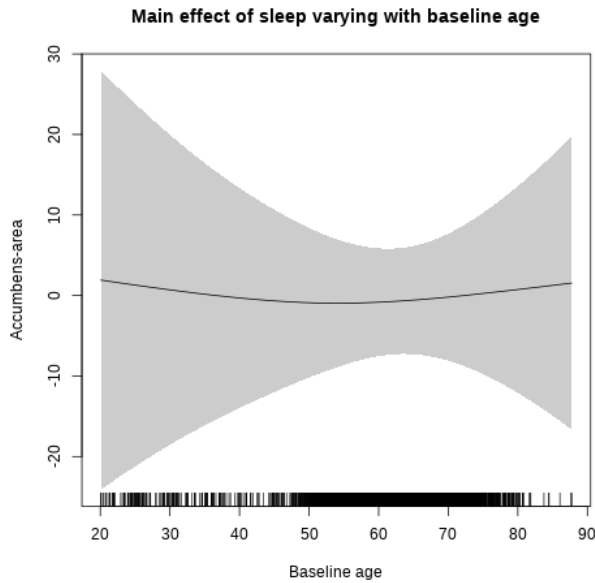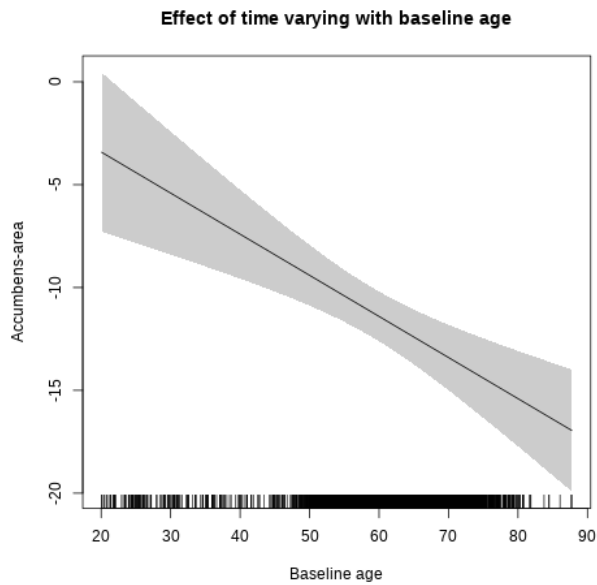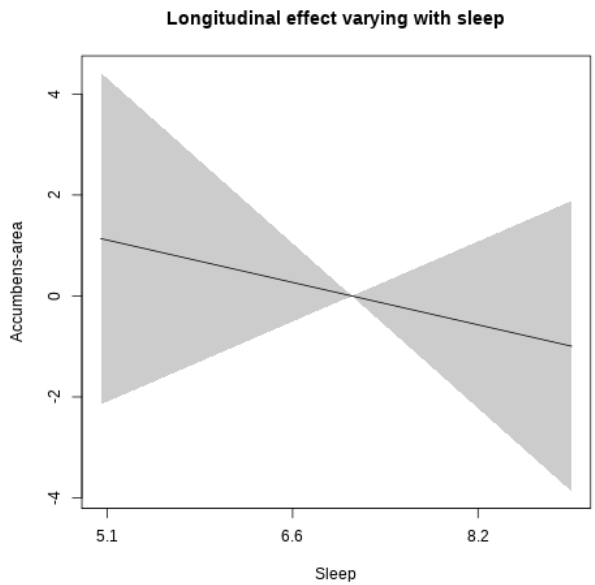

**Restricted to sleep  $\geq 5$  and  $\leq 9$  hours** Below is the row for `s(sleep_z):time` from the model output.

```
## s(sleep_z):time 1.000 1.000 0.478 0.489
```

Below are plots of a plot of `s(bl_age)`, `s(bl_age):sleep_z`, `s(bl_age):time`, and `s(sleep_z):time`. For `s(sleep_z):time`, roughly, if we cannot fit a straight line through the confidence bands, there is evidence that the effect of time depends on sleep duration. It is correct that the confidence interval is zero at one point along the axis; this happens because we do not include the main effect.

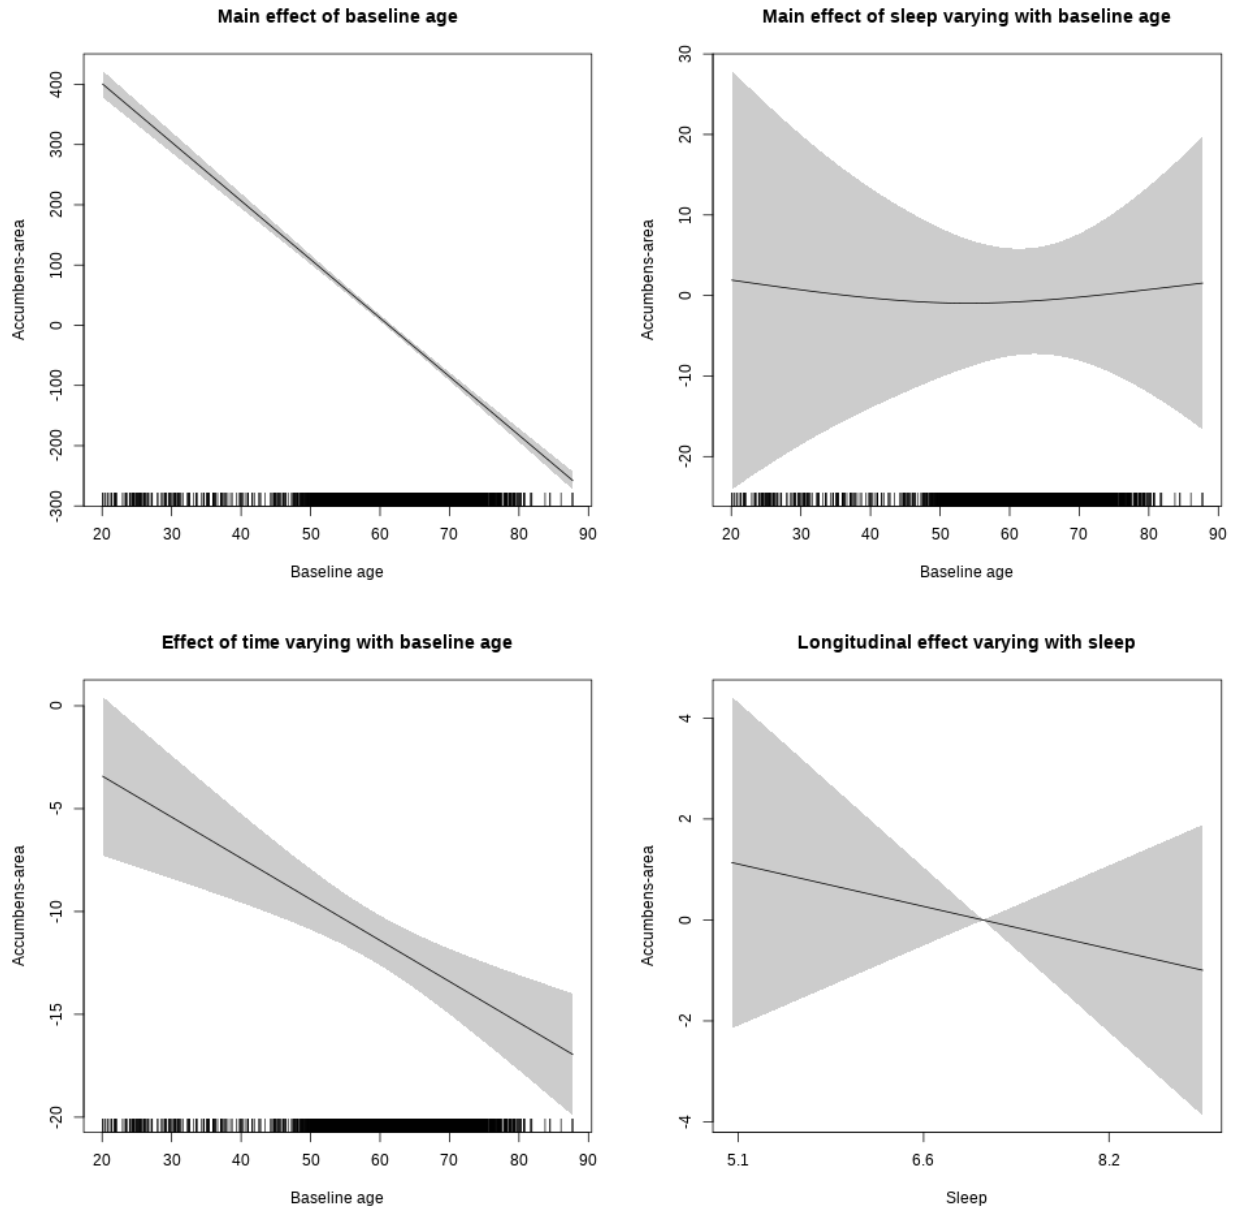

### Controlling for depression

**Full data** Below is the model output. The term `s(sleep_z):time` is probably what we care most about.

```
##
## Family: gaussian
## Link function: identity
##
## Formula:
## value ~ sex + site + depression + icv + s(bl_age, k = 10, bs = "cr") +
##   s(bl_age, by = sleep_z, bs = "cr") + +s(bl_age, by = time,
##     k = 5, bs = "cr") + s(sleep_z, by = time, k = 5, bs = "cr",
##     pc = 0)
```

```

## <environment: 0x563910d56fa8>
##
## Parametric coefficients:
##           Estimate Std. Error t value Pr(>|t|)
## (Intercept)   910.565    12.024  75.731 < 2e-16 ***
## sexmale       22.564     6.286   3.590 0.000334 ***
## siteousAvanto 215.784    27.752   7.775 8.88e-15 ***
## siteousPrisma  45.699    55.725   0.820 0.412204
## siteousSkyra  382.181    21.953  17.409 < 2e-16 ***
## siteUCAM      -83.393    14.426  -5.781 7.83e-09 ***
## siteUKB       -6.496    11.030  -0.589 0.555912
## siteUmU       319.973    17.538  18.244 < 2e-16 ***
## depression    -42.505    21.958  -1.936 0.052948 .
## icv           54.438     3.071  17.728 < 2e-16 ***
## ---
## Signif. codes:  0 '***' 0.001 '**' 0.01 '*' 0.05 '.' 0.1 ' ' 1
##
## Approximate significance of smooth terms:
##           edf Ref.df      F p-value
## s(bl_age)      3.670  3.670 310.427 <2e-16 ***
## s(bl_age):sleep_z 2.000  2.000   0.195   0.823
## s(bl_age):time  2.000  2.000 141.044 <2e-16 ***
## s(sleep_z):time 2.423  2.423   1.941   0.147
## ---
## Signif. codes:  0 '***' 0.001 '**' 0.01 '*' 0.05 '.' 0.1 ' ' 1
##
## R-sq.(adj) =  0.575
## lmer.REML = 68640 Scale est. = 2880      n = 5683

```

Below are plots of a plot of  $s(\text{bl\_age})$ ,  $s(\text{bl\_age}):\text{sleep\_z}$ ,  $s(\text{bl\_age}):\text{time}$ , and  $s(\text{sleep\_z}):\text{time}$ . For  $s(\text{sleep\_z}):\text{time}$ , roughly, if we cannot fit a straight line through the confidence bands, there is evidence that the effect of time depends on sleep duration. It is correct that the confidence interval is zero at one point along the axis; this happens because we do not include the main effect.

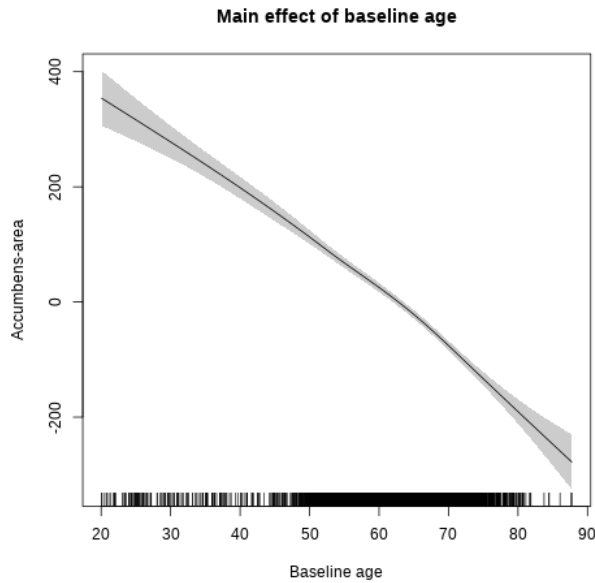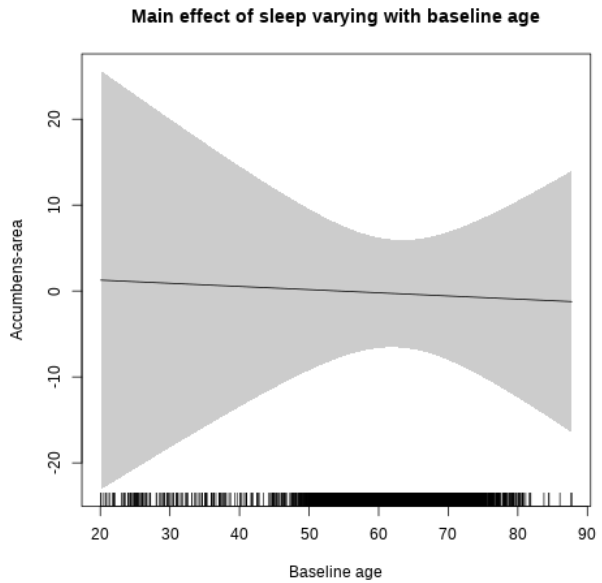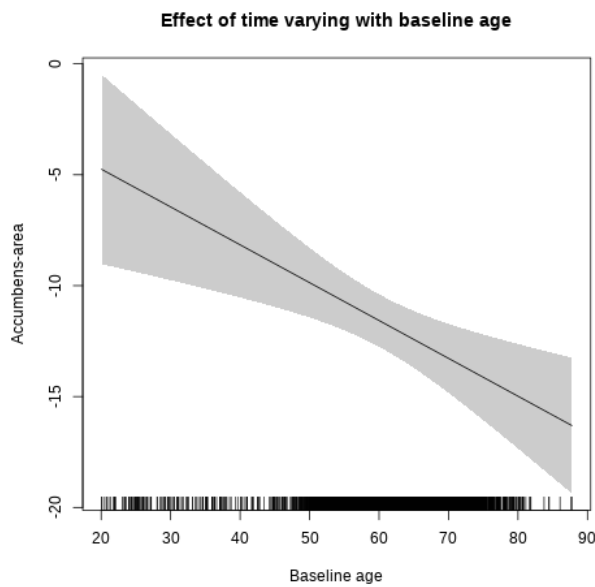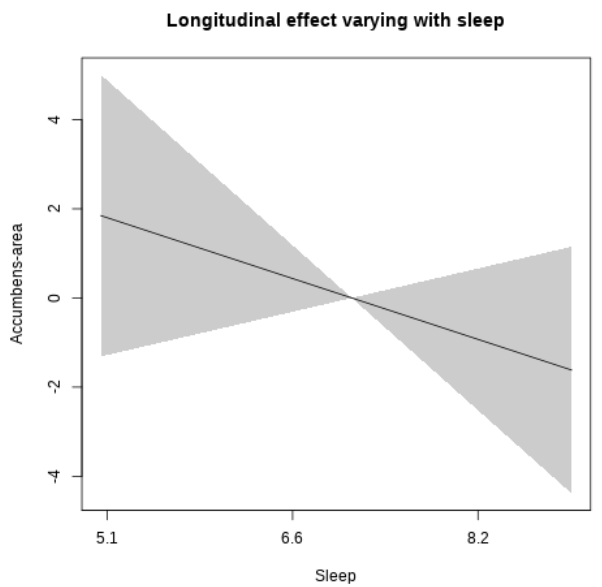

**Restricted to sleep  $\geq 5$  and  $\leq 9$  hours** Below is the row for `s(sleep_z):time` from the model output.

```
## s(sleep_z):time 1.000 1.000 1.366 0.242
```

Below are plots of a plot of `s(bl_age)`, `s(bl_age):sleep_z`, `s(bl_age):time`, and `s(sleep_z):time`. For `s(sleep_z):time`, roughly, if we cannot fit a straight line through the confidence bands, there is evidence that the effect of time depends on sleep duration. It is correct that the confidence interval is zero at one point along the axis; this happens because we do not include the main effect.

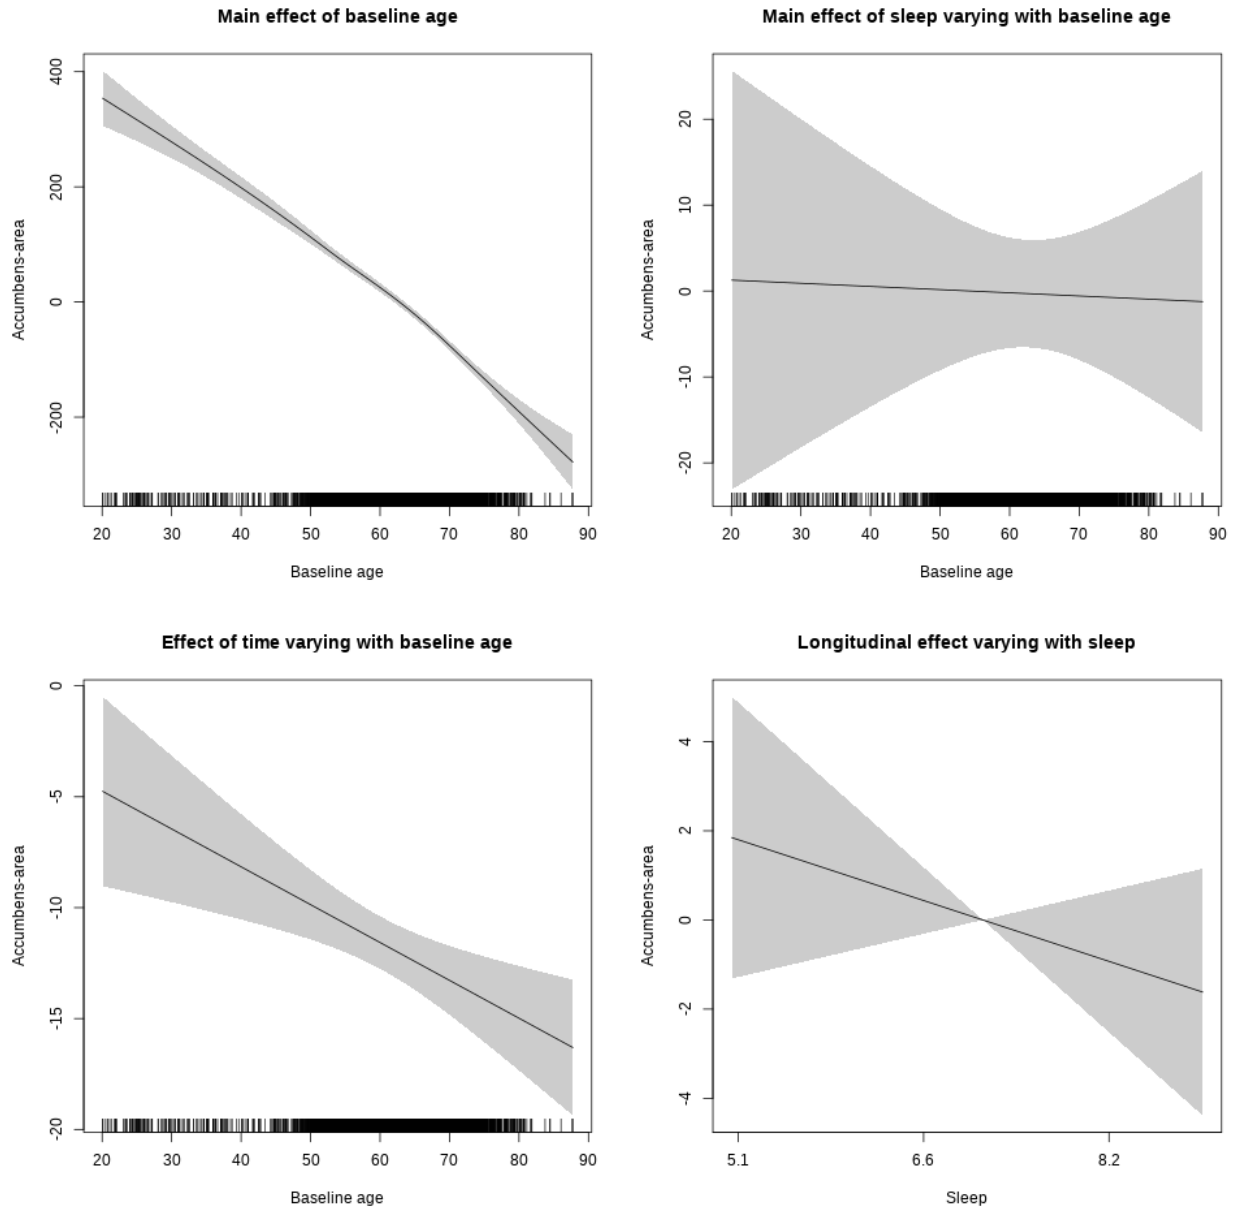

### Controlling for sleep quality

**Full data** Below is the model output. The term `s(sleep_z):time` is probably what we care most about.

```
##
## Family: gaussian
## Link function: identity
##
## Formula:
## value ~ X + s(bl_age, k = 10, bs = "cr") + s(bl_age, by = sleep_z,
##       bs = "cr") + s(bl_age, by = time, k = 5, bs = "cr") + s(sleep_z,
##       by = time, k = 5, bs = "cr", pc = 0)
## <environment: 0x56391126a060>
```

```

##
## Parametric coefficients:
##               Estimate Std. Error t value Pr(>|t|)
## (Intercept)      848.422    19.544  43.411 <2e-16 ***
## Xsexmale         76.748     7.308  10.502 <2e-16 ***
## XsiteousAvanto   223.256    18.733  11.918 <2e-16 ***
## XsiteousPrisma    63.225    44.850   1.410  0.1587
## XsiteousSkyra    360.755    18.854  19.134 <2e-16 ***
## XsiteUB          37.339    29.599   1.262  0.2072
## XsiteUCAM       -16.653    18.955  -0.879  0.3797
## XsiteUKB         55.497    59.243   0.937  0.3489
## XsiteUmU        354.424    21.222  16.701 <2e-16 ***
## Xukb_dummy:sleep_accel  8.210     4.596   1.786  0.0741 .
## Xukb_dummy:chronotype -4.546     6.119  -0.743  0.4576
## Xukb_dummy:dozing    7.403    12.646   0.585  0.5583
## Xukb_dummy:sleeplessness -13.387    7.858  -1.704  0.0885 .
## Xukb_dummy:snoring  -10.245    11.164  -0.918  0.3589
## Xukb_dummy:gettingup  -3.582     8.523  -0.420  0.6743
## Xnotukb_dummy:PSQI_Global -4.236     2.411  -1.757  0.0790 .
## ---
## Signif. codes:  0 '***' 0.001 '**' 0.01 '*' 0.05 '.' 0.1 ' ' 1
##
## Approximate significance of smooth terms:
##               edf Ref.df      F p-value
## s(bl_age)      1.594  1.594 613.737 <2e-16 ***
## s(bl_age):sleep_z 2.000  2.000   1.011  0.3641
## s(bl_age):time  2.000  2.000 191.074 <2e-16 ***
## s(sleep_z):time  1.000  1.000   3.179  0.0747 .
## ---
## Signif. codes:  0 '***' 0.001 '**' 0.01 '*' 0.05 '.' 0.1 ' ' 1
##
## R-sq.(adj) =  0.586
## lmer.REML = 51913 Scale est. = 2896.5    n = 4287

```

Below are plots of a plot of  $s(\text{bl\_age})$ ,  $s(\text{bl\_age}):\text{sleep\_z}$ ,  $s(\text{bl\_age}):\text{time}$ , and  $s(\text{sleep\_z}):\text{time}$ . For  $s(\text{sleep\_z}):\text{time}$ , roughly, if we cannot fit a straight line through the confidence bands, there is evidence that the effect of time depends on sleep duration. It is correct that that confidence interval is zero at one point along the axis; this happens because we do not include the main effect.

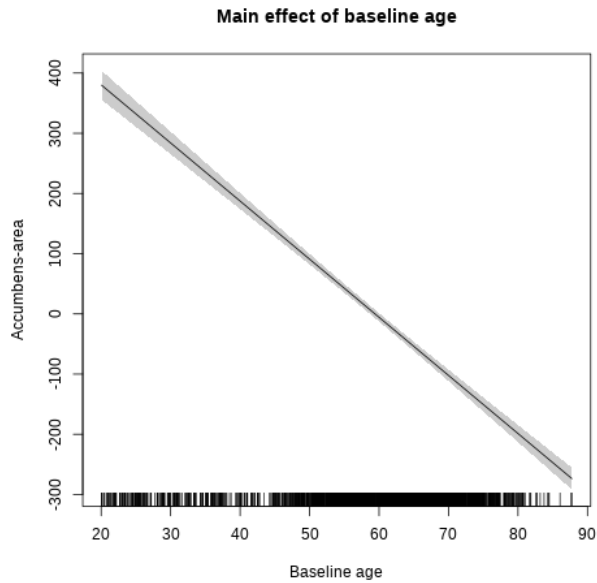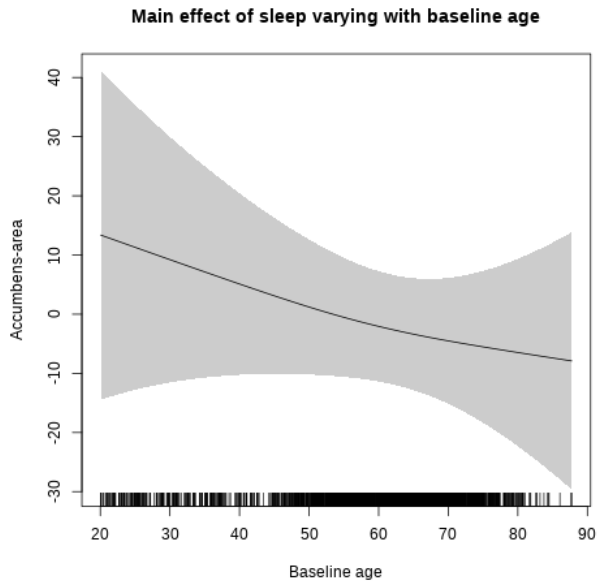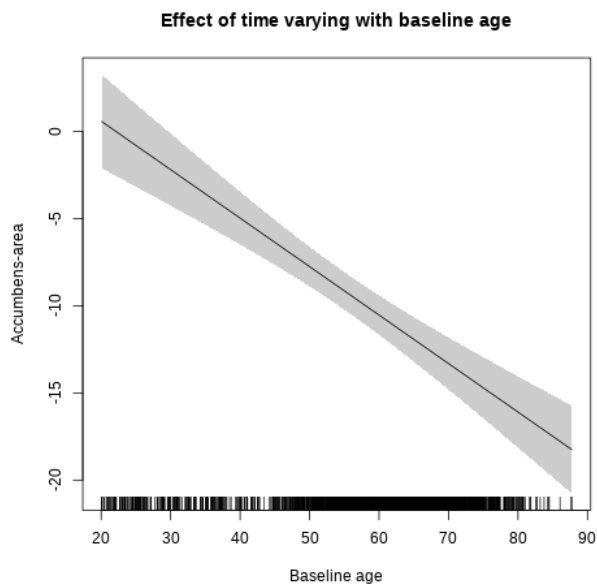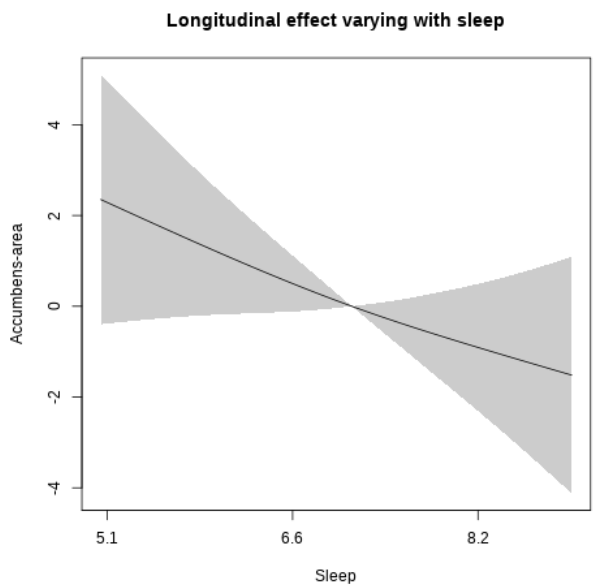

**Restricted to sleep  $\geq 5$  and  $\leq 9$  hours** Below is the row for `s(sleep_z):time` from the model output.

```
## s(sleep_z):time  1.120  1.120  2.859  0.104
```

Below are plots of a plot of `s(bl_age)`, `s(bl_age):sleep_z`, `s(bl_age):time`, and `s(sleep_z):time`. For `s(sleep_z):time`, roughly, if we cannot fit a straight line through the confidence bands, there is evidence that the effect of time depends on sleep duration. It is correct that the confidence interval is zero at one point along the axis; this happens because we do not include the main effect.



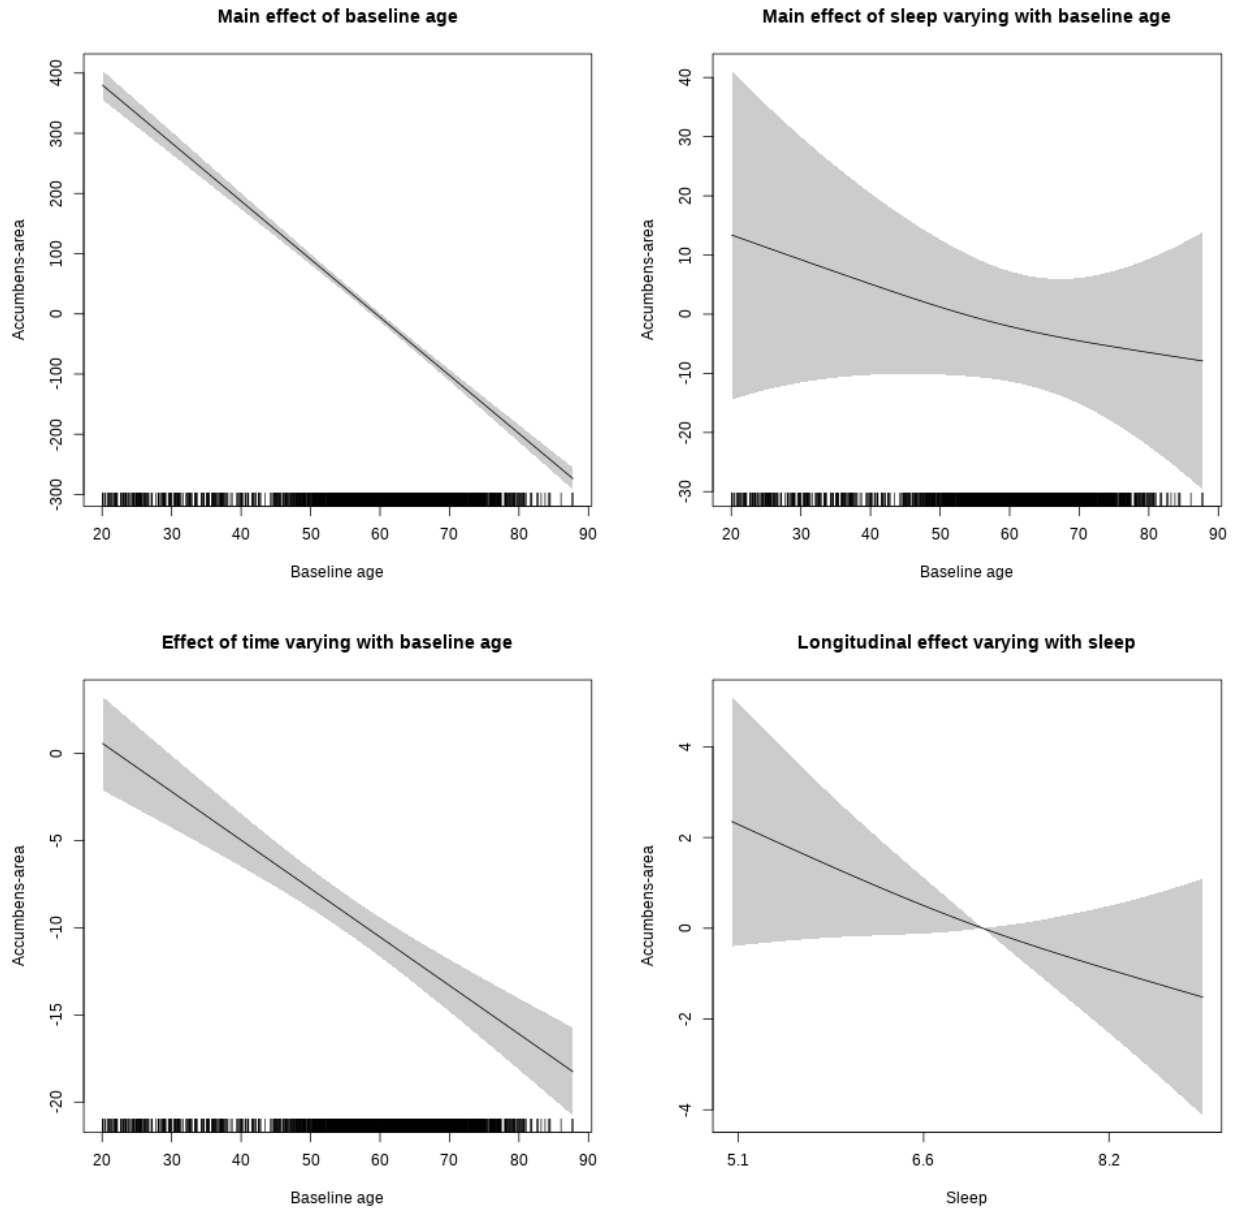

## Amygdala

### Main analysis

**Full data** Below is the model output. The term `s(sleep_z):time` is probably what we care most about.

```
##
## Family: gaussian
## Link function: identity
##
## Formula:
## value ~ sex + site + icv + s(bl_age, k = 10, bs = "cr") + s(bl_age,
##   by = sleep_z, bs = "cr") + +s(bl_age, by = time, k = 5, bs = "cr") +
```

```

##      s(sleep_z, by = time, k = 5, bs = "cr", pc = 0)
## <environment: 0x563917dfbe60>
##
## Parametric coefficients:
##              Estimate Std. Error t value Pr(>|t|)
## (Intercept)  3397.660    24.121 140.857 < 2e-16 ***
## sexmale      133.497     12.419  10.750 < 2e-16 ***
## siteousAvanto -464.628    29.667 -15.661 < 2e-16 ***
## siteousPrisma -346.387    87.177  -3.973 7.15e-05 ***
## siteousSkyra  117.770    28.837   4.084 4.47e-05 ***
## siteUB       -241.039    55.553  -4.339 1.45e-05 ***
## siteUCAM     -235.264    30.127  -7.809 6.48e-15 ***
## siteUKB      -126.316    22.973  -5.498 3.95e-08 ***
## siteUmU      -171.752    34.558  -4.970 6.83e-07 ***
## icv          197.508     6.015  32.838 < 2e-16 ***
## ---
## Signif. codes:  0 '***' 0.001 '**' 0.01 '*' 0.05 '.' 0.1 ' ' 1
##
## Approximate significance of smooth terms:
##              edf Ref.df      F p-value
## s(bl_age)      4.015  4.015 250.654 <2e-16 ***
## s(bl_age):sleep_z 2.000  2.000   0.836  0.4335
## s(bl_age):time  3.647  3.647 112.471 <2e-16 ***
## s(sleep_z):time  1.000  1.000   4.151  0.0416 *
## ---
## Signif. codes:  0 '***' 0.001 '**' 0.01 '*' 0.05 '.' 0.1 ' ' 1
##
## R-sq.(adj) =  0.494
## lmer.REML = 1.1069e+05  Scale est. = 11576      n = 8151

```

Below are plots of a plot of  $s(\text{bl\_age})$ ,  $s(\text{bl\_age}):\text{sleep\_z}$ ,  $s(\text{bl\_age}):\text{time}$ , and  $s(\text{sleep\_z}):\text{time}$ . For  $s(\text{sleep\_z}):\text{time}$ , roughly, if we cannot fit a straight line through the confidence bands, there is evidence that the effect of time depends on sleep duration. It is correct that the confidence interval is zero at one point along the axis; this happens because we do not include the main effect.

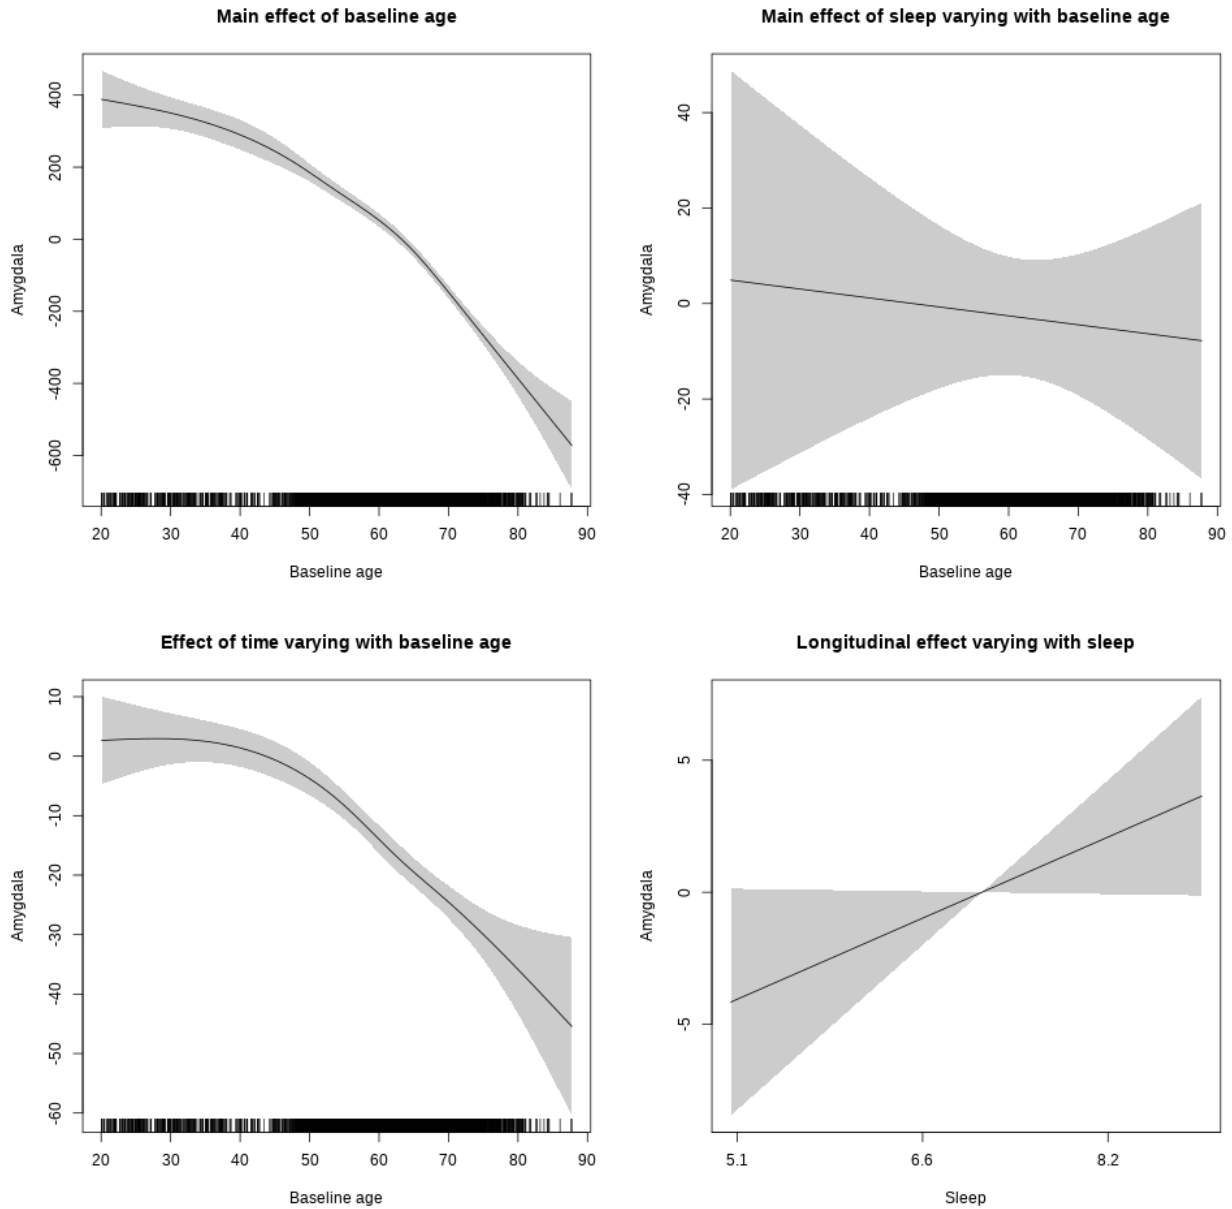

**Restricted to sleep  $\geq 5$  and  $\leq 9$  hours** Below is the row for `s(sleep_z):time` from the model output.

```
## s(sleep_z):time 1.000 1.000 3.745 0.053 .
```

Below are plots of a plot of `s(bl_age)`, `s(bl_age):sleep_z`, `s(bl_age):time`, and `s(sleep_z):time`. For `s(sleep_z):time`, roughly, if we cannot fit a straight line through the confidence bands, there is evidence that the effect of time depends on sleep duration. It is correct that the confidence interval is zero at one point along the axis; this happens because we do not include the main effect.

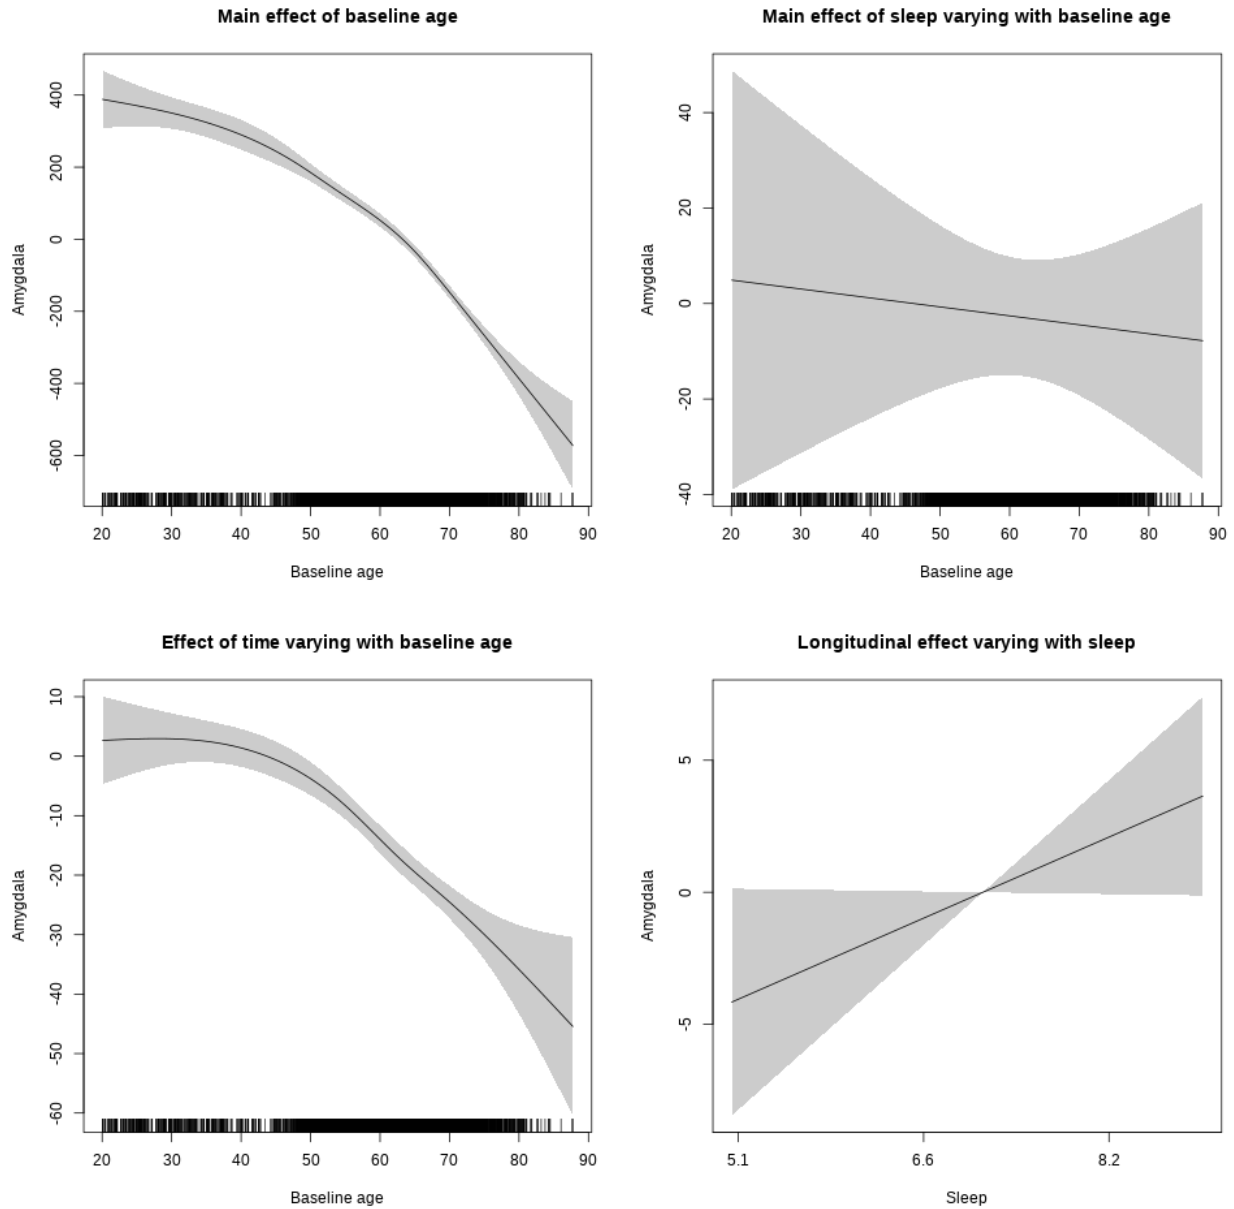

### Controlling for socioeconomic status

**Full data** Below is the model output. The term `s(sleep_z):time` is probably what we care most about.

```
##
## Family: gaussian
## Link function: identity
##
## Formula:
## value ~ sex + site + income_scaled + education_scaled + icv +
##       s(bl_age, k = 10, bs = "cr") + s(bl_age, by = sleep_z, bs = "cr") +
##       +s(bl_age, by = time, k = 5, bs = "cr") + s(sleep_z, by = time,
##       k = 5, bs = "cr", pc = 0)
```

```

## <environment: 0x563911093fb8>
##
## Parametric coefficients:
##           Estimate Std. Error t value Pr(>|t|)
## (Intercept)  3443.033    58.769  58.585 < 2e-16 ***
## sexmale      128.538     16.183   7.943 2.47e-15 ***
## siteousAvanto -469.250    65.240  -7.193 7.37e-13 ***
## siteousPrisma -183.765   146.483  -1.255 0.20972
## siteousSkyra  134.123     60.032   2.234 0.02552 *
## siteUKB      -160.793    55.595  -2.892 0.00384 **
## income_scaled  -9.097     20.659  -0.440 0.65970
## education_scaled -16.944    22.856  -0.741 0.45853
## icv          224.618     8.055  27.886 < 2e-16 ***
## ---
## Signif. codes:  0 '***' 0.001 '**' 0.01 '*' 0.05 '.' 0.1 ' ' 1
##
## Approximate significance of smooth terms:
##           edf Ref.df      F p-value
## s(bl_age)      3.454  3.454 116.883 <2e-16 ***
## s(bl_age):sleep_z 5.428  5.428   1.364   0.147
## s(bl_age):time  2.359  2.359  51.834 <2e-16 ***
## s(sleep_z):time  2.657  2.657   1.840   0.104
## ---
## Signif. codes:  0 '***' 0.001 '**' 0.01 '*' 0.05 '.' 0.1 ' ' 1
##
## R-sq.(adj) =  0.489
## lmer.REML = 63373 Scale est. = 11975      n = 4652

```

Below are plots of a plot of  $s(\text{bl\_age})$ ,  $s(\text{bl\_age}):\text{sleep\_z}$ ,  $s(\text{bl\_age}):\text{time}$ , and  $s(\text{sleep\_z}):\text{time}$ . For  $s(\text{sleep\_z}):\text{time}$ , roughly, if we cannot fit a straight line through the confidence bands, there is evidence that the effect of time depends on sleep duration. It is correct that the confidence interval is zero at one point along the axis; this happens because we do not include the main effect.

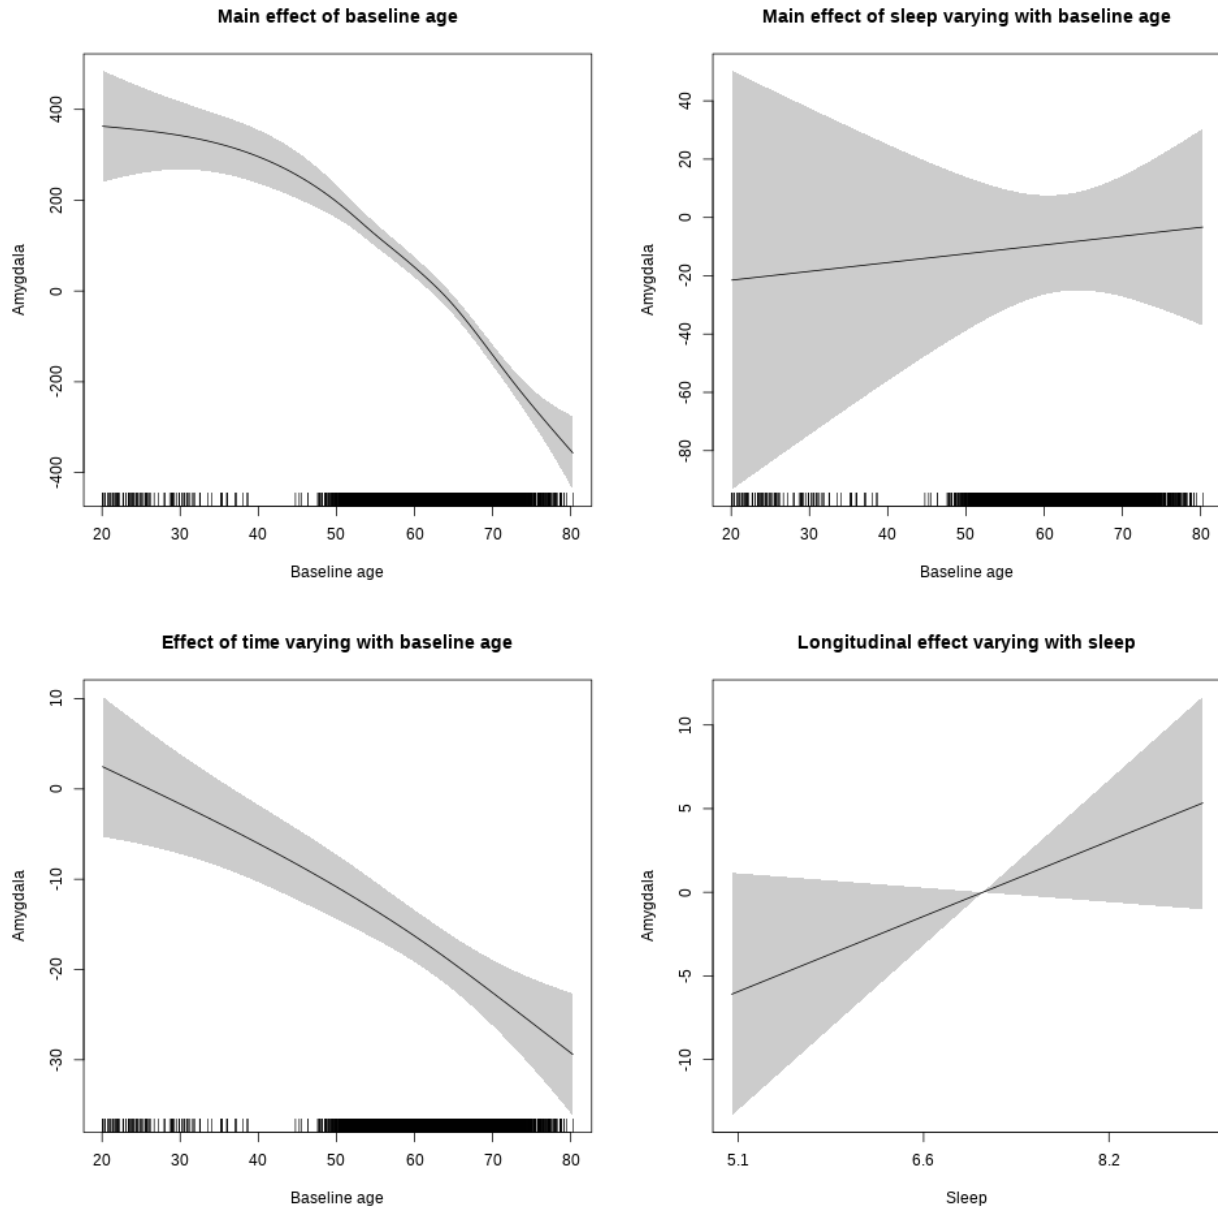

**Restricted to sleep  $\geq 5$  and  $\leq 9$  hours** Below is the row for `s(sleep_z):time` from the model output.

```
## s(sleep_z):time  1.000  1.000  2.819  0.0932 .
```

Below are plots of a plot of `s(bl_age)`, `s(bl_age):sleep_z`, `s(bl_age):time`, and `s(sleep_z):time`. For `s(sleep_z):time`, roughly, if we cannot fit a straight line through the confidence bands, there is evidence that the effect of time depends on sleep duration. It is correct that the confidence interval is zero at one point along the axis; this happens because we do not include the main effect.



## Controlling for BMI

**Full data** Below is the model output. The term `s(sleep_z):time` is probably what we care most about.

```
##
## Family: gaussian
## Link function: identity
##
## Formula:
## value ~ sex + site + bmi + icv + s(bl_age, k = 10, bs = "cr") +
##   s(bl_age, by = sleep_z, bs = "cr") + s(bl_age, by = time,
##   k = 5, bs = "cr") + s(sleep_z, by = time, k = 5, bs = "cr",
##   pc = 0)
```

```

## <environment: 0x5639154898e8>
##
## Parametric coefficients:
##           Estimate Std. Error t value Pr(>|t|)
## (Intercept) 2889.729    53.352  54.164 < 2e-16 ***
## sexmale      127.089    14.813   8.580 < 2e-16 ***
## siteousPrisma 130.493    85.097   1.533  0.1252
## siteousSkyra  606.348    26.867  22.569 < 2e-16 ***
## siteUCAM     201.688    41.169   4.899 9.92e-07 ***
## siteUKB      293.716    38.610   7.607 3.28e-14 ***
## siteUmU      288.470    46.835   6.159 7.83e-10 ***
## bmi          3.067     1.530   2.004  0.0451 *
## icv          217.316    7.349  29.571 < 2e-16 ***
## ---
## Signif. codes:  0 '***' 0.001 '**' 0.01 '*' 0.05 '.' 0.1 ' ' 1
##
## Approximate significance of smooth terms:
##           edf Ref.df      F p-value
## s(bl_age)      3.532  3.532 172.542 < 2e-16 ***
## s(bl_age):sleep_z 2.000  2.000   0.040 0.96052
## s(bl_age):time  2.303  2.303  54.497 < 2e-16 ***
## s(sleep_z):time  3.078  3.078   4.501 0.00348 **
## ---
## Signif. codes:  0 '***' 0.001 '**' 0.01 '*' 0.05 '.' 0.1 ' ' 1
##
## R-sq.(adj) =  0.492
## lmer.REML = 73562  Scale est. = 11191    n = 5414

```

Below are plots of a plot of `s(bl_age)`, `s(bl_age):sleep_z`, `s(bl_age):time`, and `s(sleep_z):time`. For `s(sleep_z):time`, roughly, if we cannot fit a straight line through the confidence bands, there is evidence that the effect of time depends on sleep duration. It is correct that the confidence interval is zero at one point along the axis; this happens because we do not include the main effect.



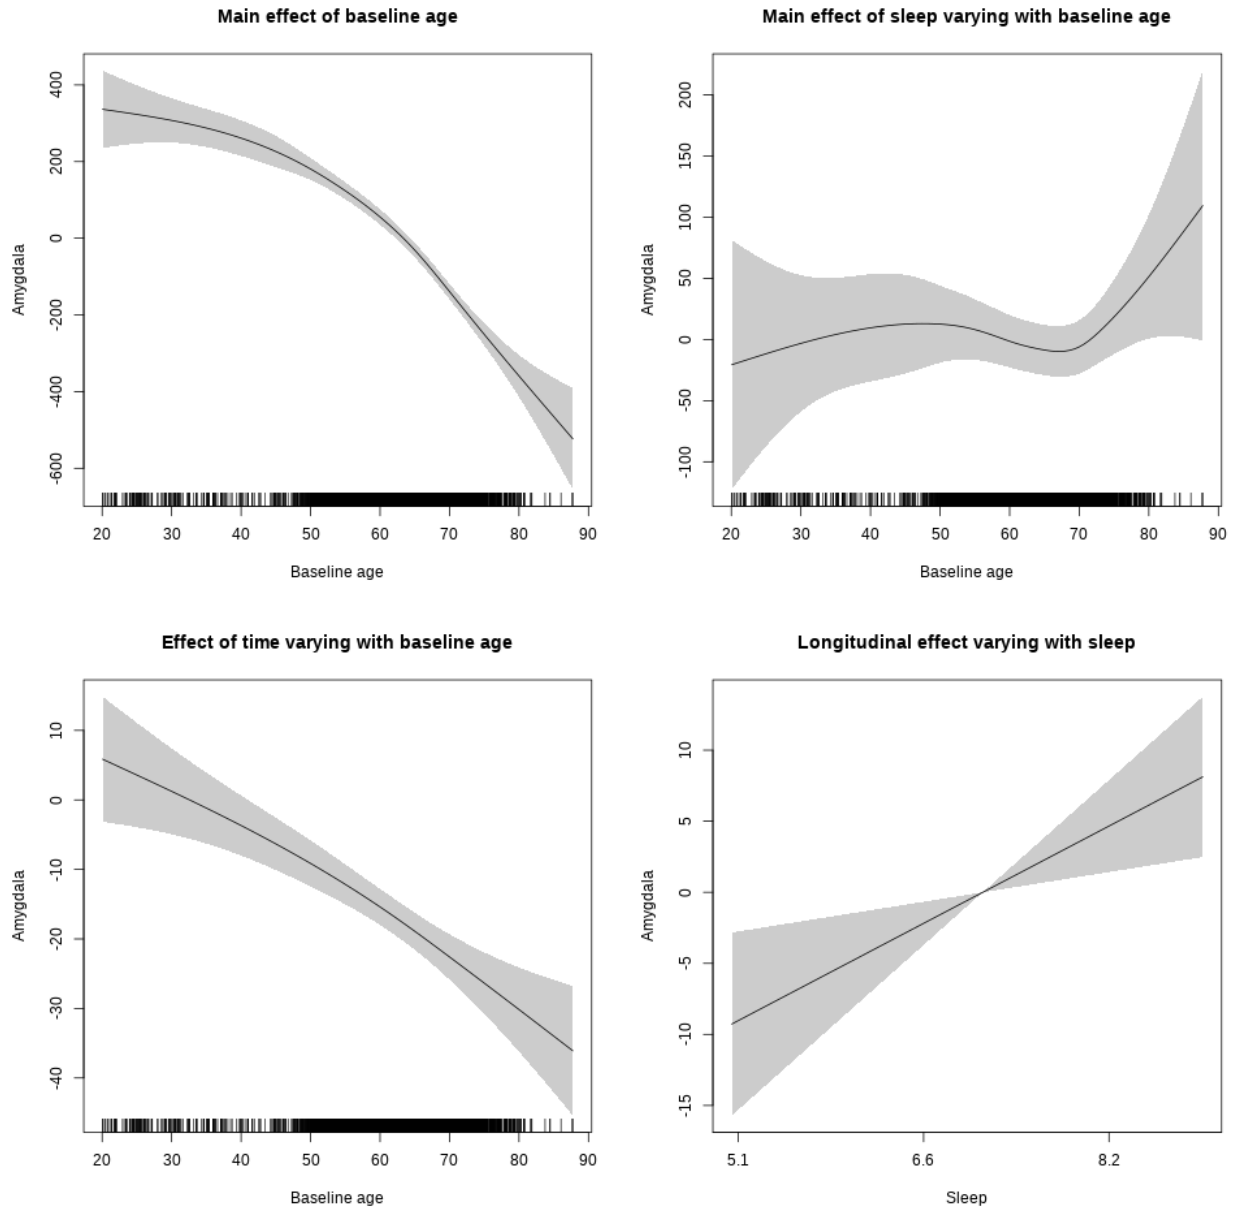

**Restricted to sleep  $\geq 5$  and  $\leq 9$  hours** Below is the row for `s(sleep_z):time` from the model output.

```
## s(sleep_z):time 1.000 1.000 8.286 0.00401 **
```

Below are plots of a plot of `s(bl_age)`, `s(bl_age):sleep_z`, `s(bl_age):time`, and `s(sleep_z):time`. For `s(sleep_z):time`, roughly, if we cannot fit a straight line through the confidence bands, there is evidence that the effect of time depends on sleep duration. It is correct that the confidence interval is zero at one point along the axis; this happens because we do not include the main effect.

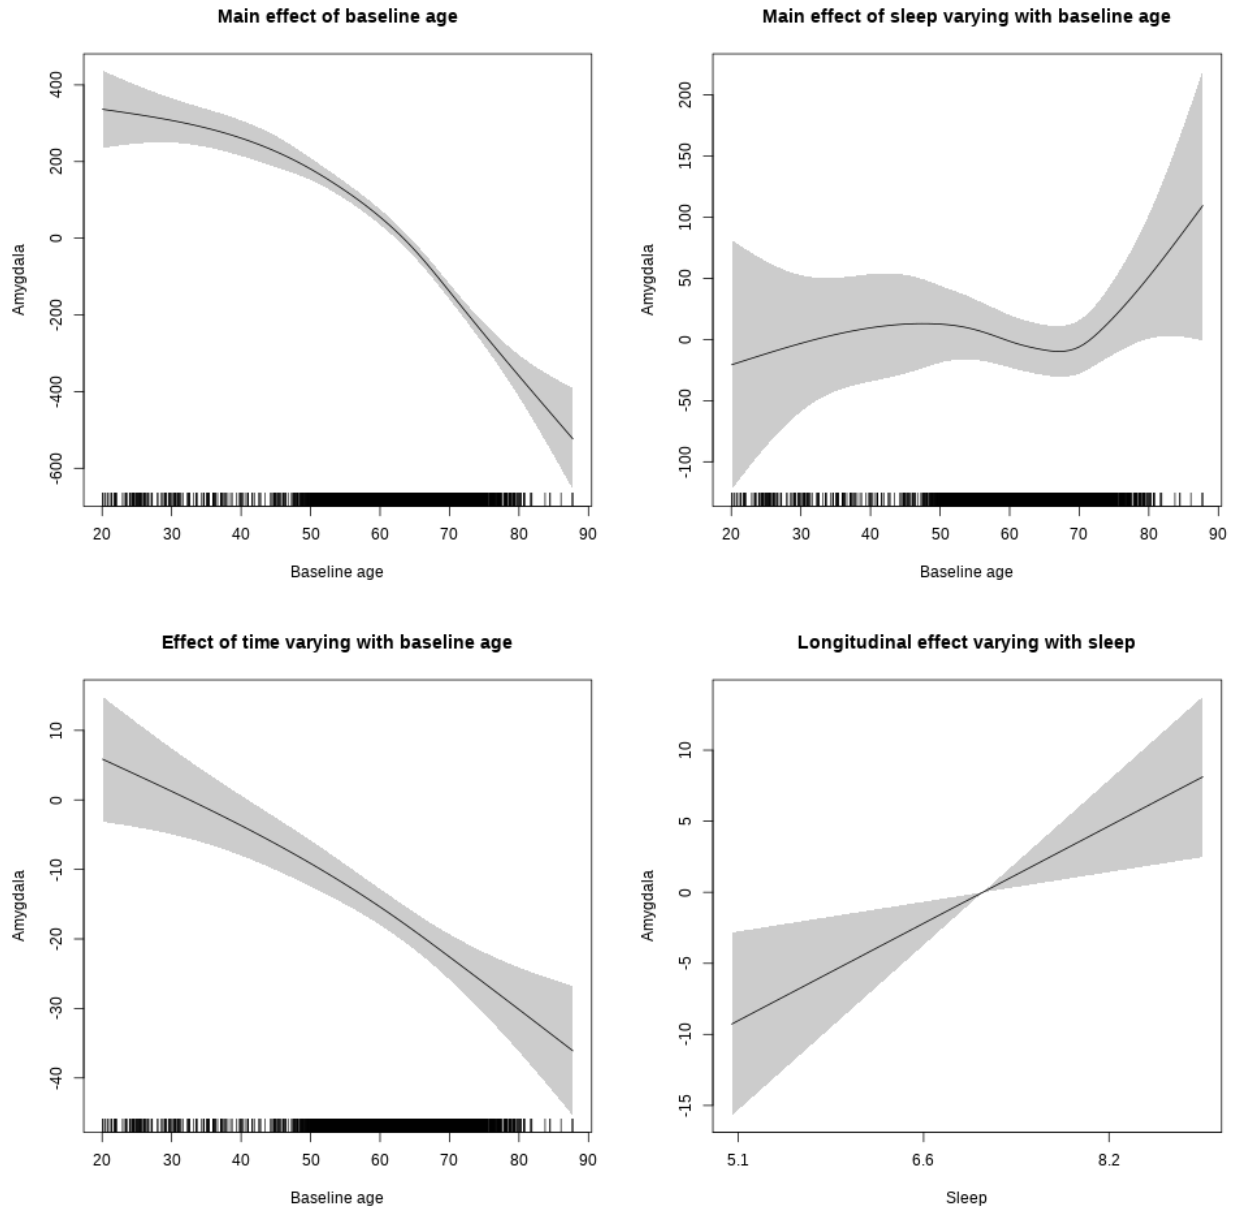

## Controlling for depression

**Full data** Below is the model output. The term `s(sleep_z):time` is probably what we care most about.

```
##
## Family: gaussian
## Link function: identity
##
## Formula:
## value ~ sex + site + depression + icv + s(bl_age, k = 10, bs = "cr") +
##       s(bl_age, by = sleep_z, bs = "cr") + +s(bl_age, by = time,
##       k = 5, bs = "cr") + s(sleep_z, by = time, k = 5, bs = "cr",
##       pc = 0)
```

```

## <environment: 0x56390ec80b80>
##
## Parametric coefficients:
##           Estimate Std. Error t value Pr(>|t|)
## (Intercept)  3390.991    28.548 118.783 < 2e-16 ***
## sexmale      126.203    14.925   8.456 < 2e-16 ***
## siteousAvanto -431.053    62.185  -6.932 4.62e-12 ***
## siteousPrisma -367.633   113.563  -3.237 0.00121 **
## siteousSkyra  227.021    52.127   4.355 1.35e-05 ***
## siteUCAM     -213.701    34.327  -6.225 5.15e-10 ***
## siteUKB      -130.707    26.226  -4.984 6.42e-07 ***
## siteUmU      -99.948    41.779  -2.392 0.01677 *
## depression   -97.924    52.322  -1.872 0.06132 .
## icv          199.938     7.229  27.659 < 2e-16 ***
## ---
## Signif. codes:  0 '***' 0.001 '**' 0.01 '*' 0.05 '.' 0.1 ' ' 1
##
## Approximate significance of smooth terms:
##           edf Ref.df      F p-value
## s(bl_age)      3.639  3.639 151.891 <2e-16 ***
## s(bl_age):sleep_z 2.000  2.000   0.684 0.5046
## s(bl_age):time  2.333  2.333 101.515 <2e-16 ***
## s(sleep_z):time  1.000  1.000   3.830 0.0504 .
## ---
## Signif. codes:  0 '***' 0.001 '**' 0.01 '*' 0.05 '.' 0.1 ' ' 1
##
## R-sq.(adj) =  0.46
## lmer.REML = 77317 Scale est. = 10874    n = 5681

```

Below are plots of a plot of  $s(\text{bl\_age})$ ,  $s(\text{bl\_age}):\text{sleep\_z}$ ,  $s(\text{bl\_age}):\text{time}$ , and  $s(\text{sleep\_z}):\text{time}$ . For  $s(\text{sleep\_z}):\text{time}$ , roughly, if we cannot fit a straight line through the confidence bands, there is evidence that the effect of time depends on sleep duration. It is correct that the confidence interval is zero at one point along the axis; this happens because we do not include the main effect.

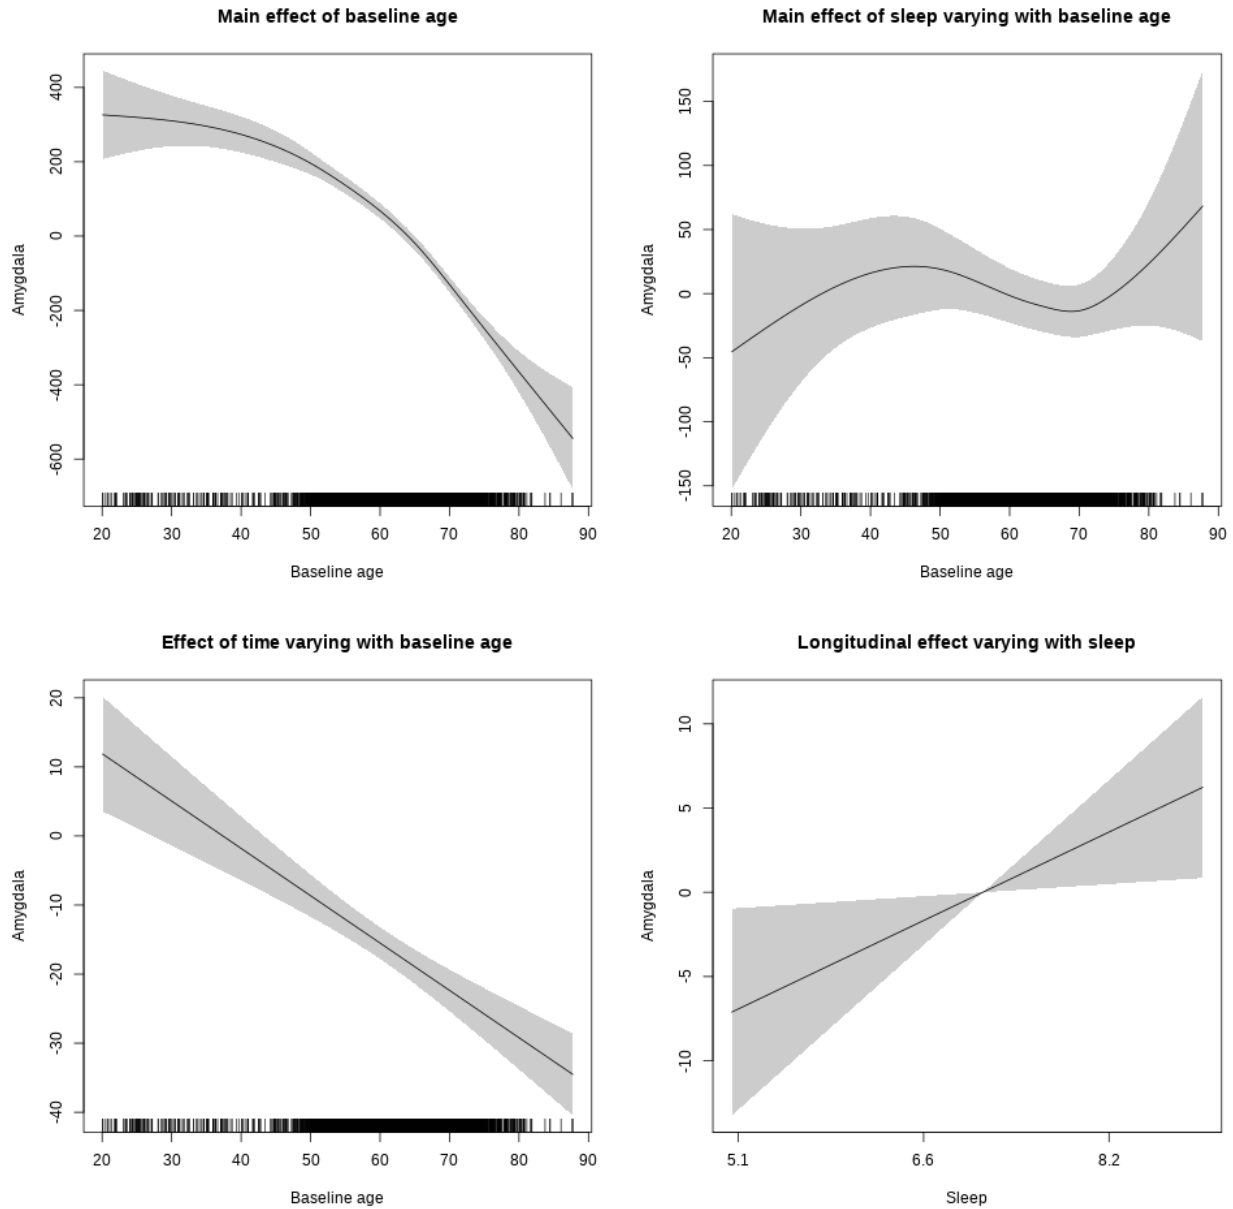

**Restricted to sleep  $\geq 5$  and  $\leq 9$  hours** Below is the row for `s(sleep_z):time` from the model output.

```
## s(sleep_z):time  1.000  1.000  5.361  0.0206 *
```

Below are plots of a plot of `s(bl_age)`, `s(bl_age):sleep_z`, `s(bl_age):time`, and `s(sleep_z):time`. For `s(sleep_z):time`, roughly, if we cannot fit a straight line through the confidence bands, there is evidence that the effect of time depends on sleep duration. It is correct that the confidence interval is zero at one point along the axis; this happens because we do not include the main effect.

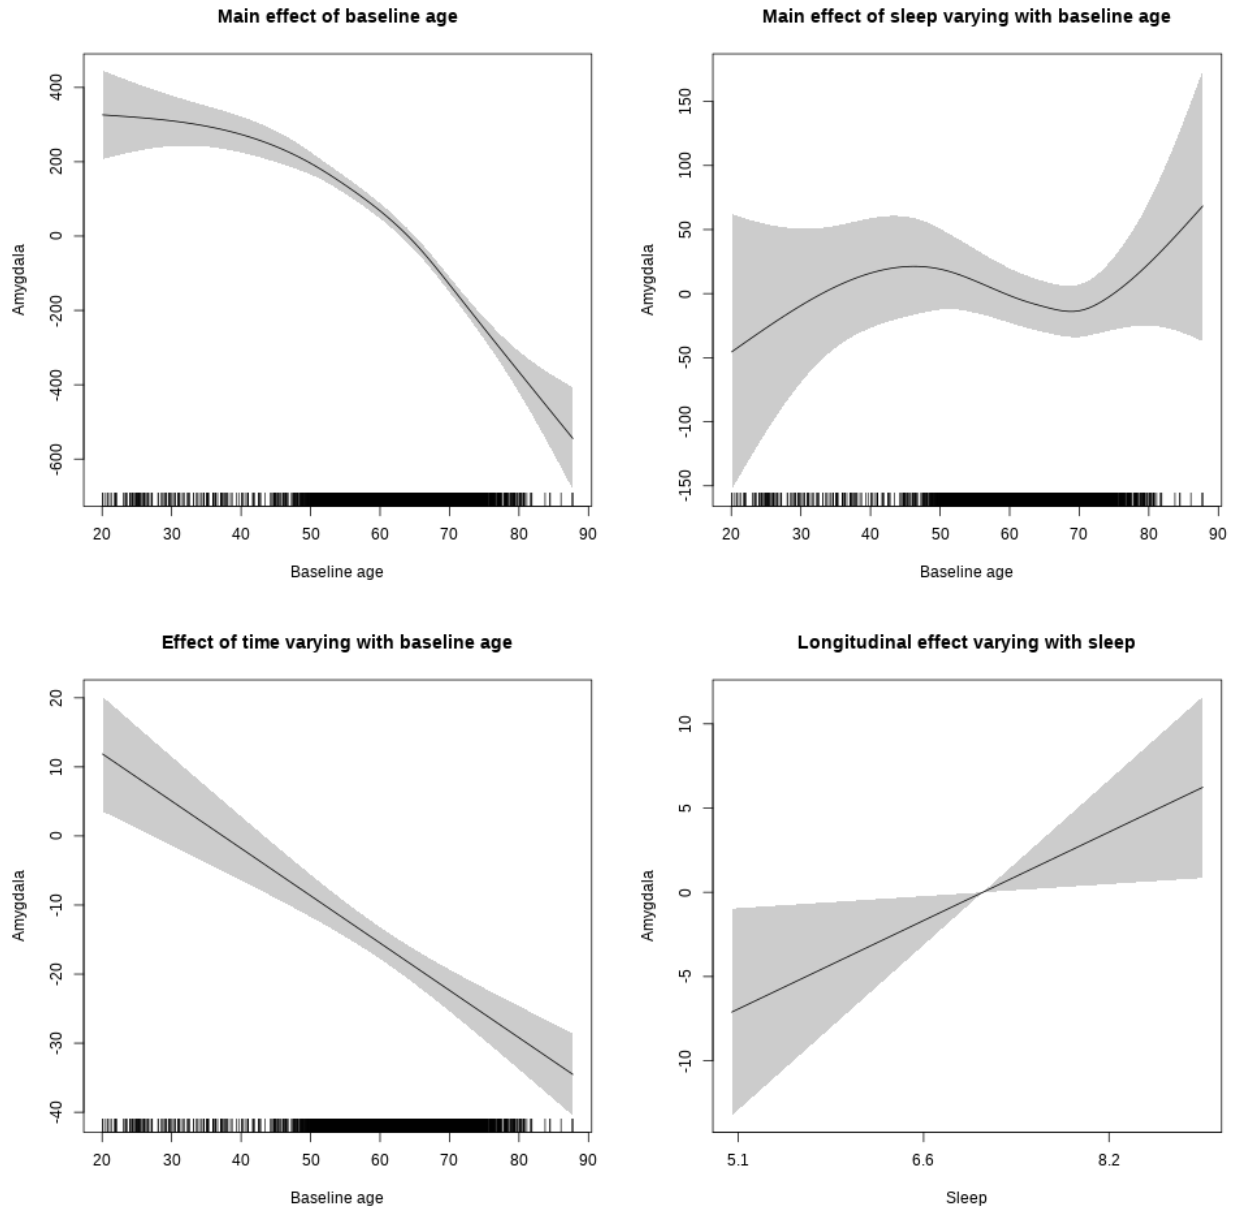

### Controlling for sleep quality

**Full data** Below is the model output. The term `s(sleep_z):time` is probably what we care most about.

```
##
## Family: gaussian
## Link function: identity
##
## Formula:
## value ~ X + s(bl_age, k = 10, bs = "cr") + s(bl_age, by = sleep_z,
##       bs = "cr") + s(bl_age, by = time, k = 5, bs = "cr") + s(sleep_z,
##       by = time, k = 5, bs = "cr", pc = 0)
## <environment: 0x563910fc7f88>
```

```

##
## Parametric coefficients:
##               Estimate Std. Error t value Pr(>|t|)
## (Intercept)    2965.788    46.349  63.989 < 2e-16 ***
## Xsexmale       352.404    17.334  20.330 < 2e-16 ***
## XsiteousAvanto -20.540    44.344  -0.463  0.64324
## XsiteousPrisma 176.043    91.136   1.932  0.05347 .
## XsiteousSkyra  481.125    44.534  10.804 < 2e-16 ***
## XsiteUB        41.765    70.331   0.594  0.55265
## XsiteUCAM      136.176    45.382   3.001  0.00271 **
## XsiteUKB       367.194   141.125   2.602  0.00930 **
## XsiteUmU       119.840    50.481   2.374  0.01764 *
## Xukb_dummy:sleep_accel  9.487    10.902   0.870  0.38423
## Xukb_dummy:chronotype -7.087    14.516  -0.488  0.62540
## Xukb_dummy:dozing   44.390    29.997   1.480  0.13900
## Xukb_dummy:sleeplessness -37.512    18.690  -2.007  0.04481 *
## Xukb_dummy:snoring  -17.975    26.476  -0.679  0.49723
## Xukb_dummy:gettingup -27.031    20.313  -1.331  0.18335
## Xnotukb_dummy:PSQI_Global -1.912     5.736  -0.333  0.73894
## ---
## Signif. codes:  0 '***' 0.001 '**' 0.01 '*' 0.05 '.' 0.1 ' ' 1
##
## Approximate significance of smooth terms:
##               edf Ref.df      F p-value
## s(bl_age)      3.269  3.269 140.995 <2e-16 ***
## s(bl_age):sleep_z 2.000  2.000   0.877   0.416
## s(bl_age):time  4.112  4.112  69.529 <2e-16 ***
## s(sleep_z):time  1.000  1.000   0.831   0.362
## ---
## Signif. codes:  0 '***' 0.001 '**' 0.01 '*' 0.05 '.' 0.1 ' ' 1
##
## R-sq.(adj) =  0.385
## lmer.REML = 58397  Scale est. = 10884    n = 4287

```

Below are plots of a plot of  $s(\text{bl\_age})$ ,  $s(\text{bl\_age}):\text{sleep\_z}$ ,  $s(\text{bl\_age}):\text{time}$ , and  $s(\text{sleep\_z}):\text{time}$ . For  $s(\text{sleep\_z}):\text{time}$ , roughly, if we cannot fit a straight line through the confidence bands, there is evidence that the effect of time depends on sleep duration. It is correct that that confidence interval is zero at one point along the axis; this happens because we do not include the main effect.

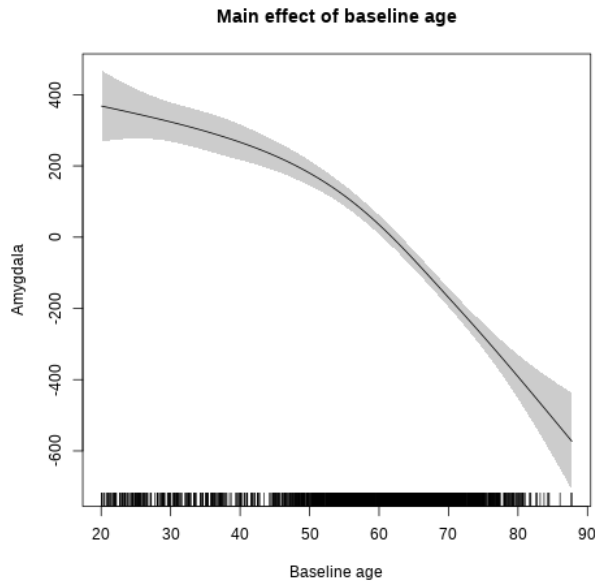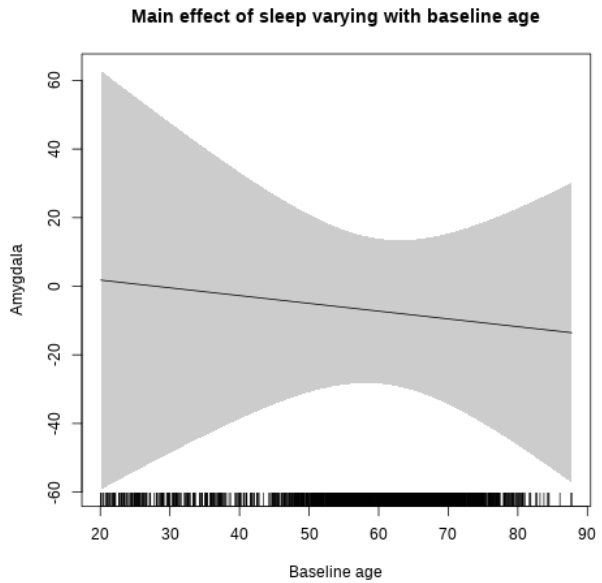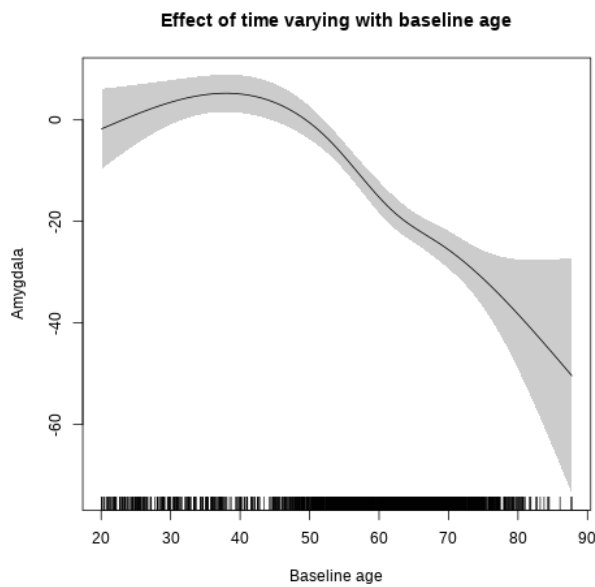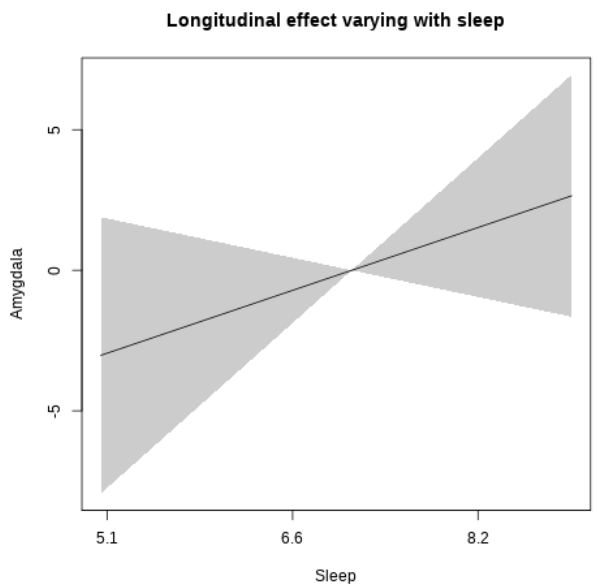

**Restricted to sleep  $\geq 5$  and  $\leq 9$  hours** Below is the row for `s(sleep_z):time` from the model output.

```
## s(sleep_z):time 1.000 1.000 1.516 0.218
```

Below are plots of a plot of `s(bl_age)`, `s(bl_age):sleep_z`, `s(bl_age):time`, and `s(sleep_z):time`. For `s(sleep_z):time`, roughly, if we cannot fit a straight line through the confidence bands, there is evidence that the effect of time depends on sleep duration. It is correct that the confidence interval is zero at one point along the axis; this happens because we do not include the main effect.

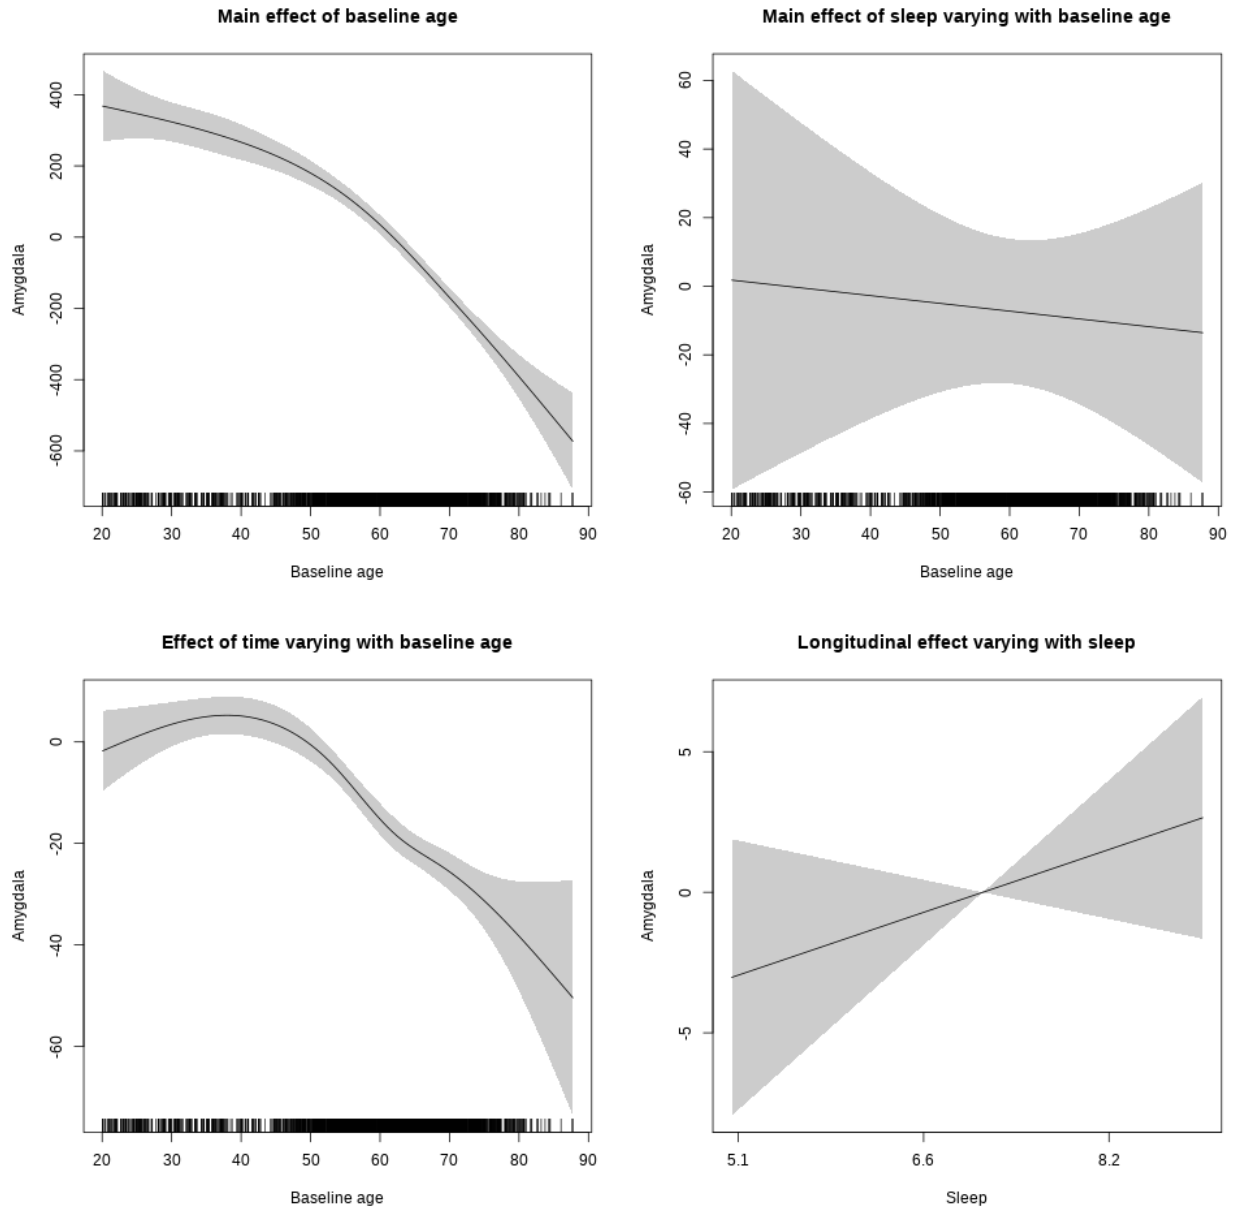

## Brain-Stem

### Main analysis

**Full data** Below is the model output. The term `s(sleep_z):time` is probably what we care most about.

```
##
## Family: gaussian
## Link function: identity
##
## Formula:
## value ~ sex + site + icv + s(bl_age, k = 10, bs = "cr") + s(bl_age,
##   by = sleep_z, bs = "cr") + +s(bl_age, by = time, k = 5, bs = "cr") +
```



```

##      s(sleep_z, by = time, k = 5, bs = "cr", pc = 0)
## <environment: 0x5639116bca58>
##
## Parametric coefficients:
##              Estimate Std. Error t value Pr(>|t|)
## (Intercept)  23182.25    131.24 176.643 < 2e-16 ***
## sexmale      806.65      67.38  11.971 < 2e-16 ***
## siteousAvanto -2480.44    161.10 -15.397 < 2e-16 ***
## siteousPrisma -3068.28    294.53 -10.418 < 2e-16 ***
## siteousSkyra  -1801.27    157.24 -11.456 < 2e-16 ***
## siteUB        -2539.85    310.26  -8.186 3.11e-16 ***
## siteUCAM      -2668.75    167.22 -15.960 < 2e-16 ***
## siteUKB       -1520.46    126.37 -12.032 < 2e-16 ***
## siteUmU       -3606.40    191.70 -18.812 < 2e-16 ***
## icv           1370.90     30.66  44.706 < 2e-16 ***
## ---
## Signif. codes:  0 '***' 0.001 '**' 0.01 '*' 0.05 '.' 0.1 ' ' 1
##
## Approximate significance of smooth terms:
##              edf Ref.df      F p-value
## s(bl_age)      5.538  5.538 16.738 <2e-16 ***
## s(bl_age):sleep_z 2.000  2.000  2.081  0.1249
## s(bl_age):time  3.339  3.339 81.431 <2e-16 ***
## s(sleep_z):time 2.269  2.269  4.223  0.0122 *
## ---
## Signif. codes:  0 '***' 0.001 '**' 0.01 '*' 0.05 '.' 0.1 ' ' 1
##
## R-sq.(adj) =  0.496
## lmer.REML = 1.3297e+05  Scale est. = 99287      n = 8137

```

Below are plots of a plot of  $s(\text{bl\_age})$ ,  $s(\text{bl\_age}):\text{sleep\_z}$ ,  $s(\text{bl\_age}):\text{time}$ , and  $s(\text{sleep\_z}):\text{time}$ . For  $s(\text{sleep\_z}):\text{time}$ , roughly, if we cannot fit a straight line through the confidence bands, there is evidence that the effect of time depends on sleep duration. It is correct that the confidence interval is zero at one point along the axis; this happens because we do not include the main effect.

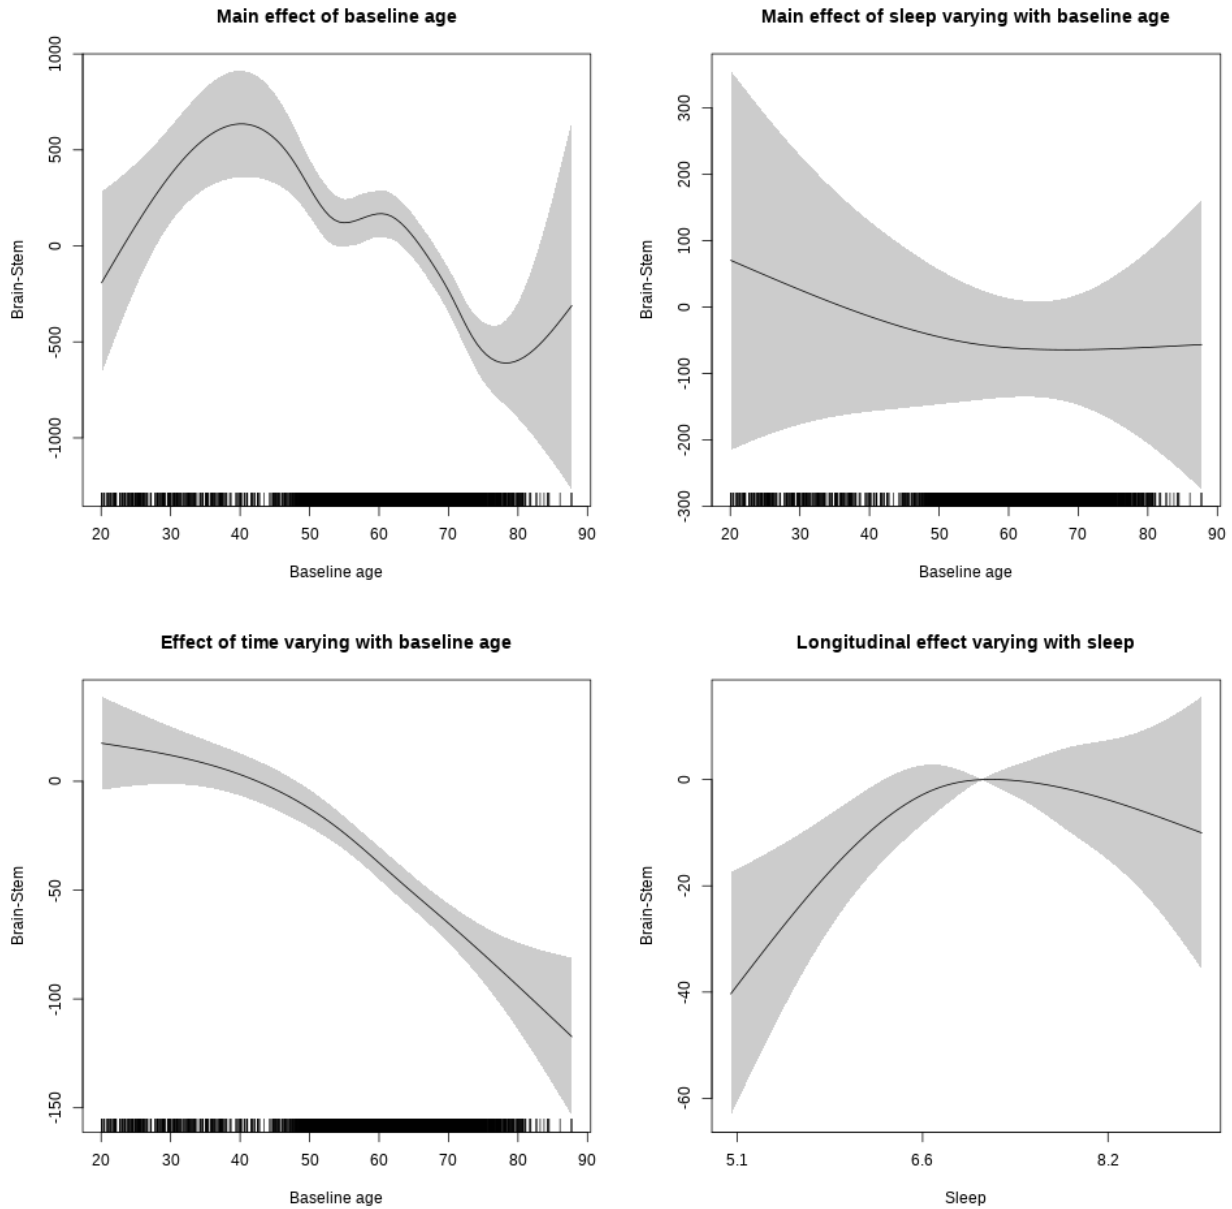

**Restricted to sleep  $\geq 5$  and  $\leq 9$  hours** Below is the row for `s(sleep_z):time` from the model output.

```
## s(sleep_z):time 2.346 2.346 4.525 0.0054 **
```

Below are plots of a plot of `s(bl_age)`, `s(bl_age):sleep_z`, `s(bl_age):time`, and `s(sleep_z):time`. For `s(sleep_z):time`, roughly, if we cannot fit a straight line through the confidence bands, there is evidence that the effect of time depends on sleep duration. It is correct that the confidence interval is zero at one point along the axis; this happens because we do not include the main effect.

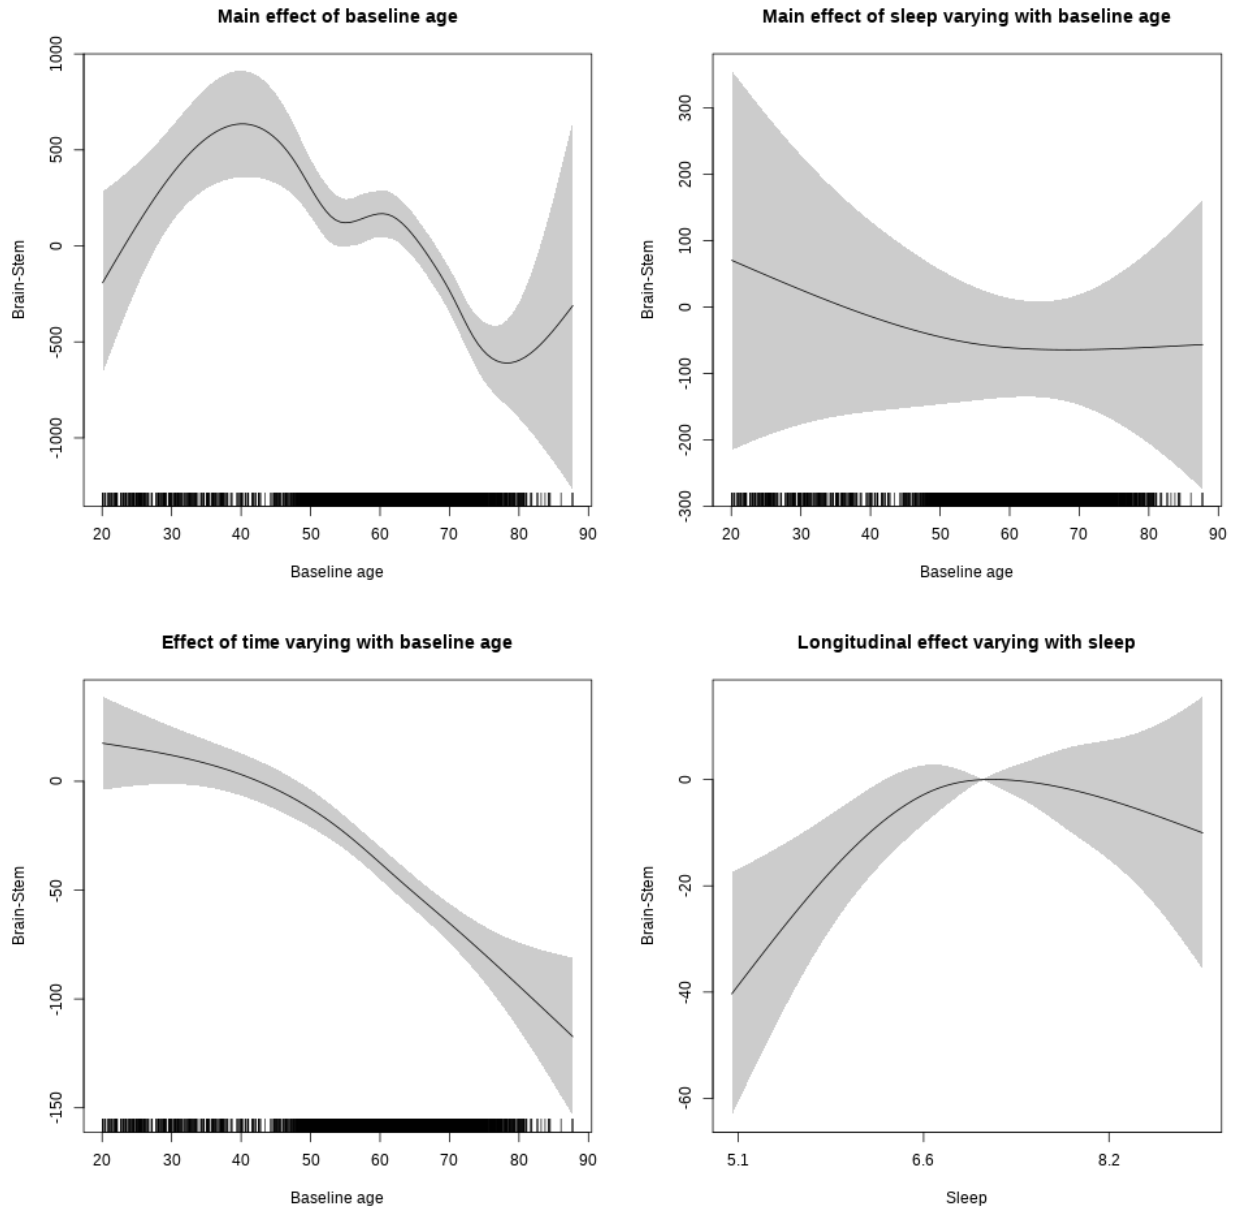

### Controlling for socioeconomic status

**Full data** Below is the model output. The term `s(sleep_z):time` is probably what we care most about.

```
##
## Family: gaussian
## Link function: identity
##
## Formula:
## value ~ sex + site + income_scaled + education_scaled + icv +
##       s(bl_age, k = 10, bs = "cr") + s(bl_age, by = sleep_z, bs = "cr") +
##       +s(bl_age, by = time, k = 5, bs = "cr") + s(sleep_z, by = time,
##       k = 5, bs = "cr", pc = 0)
```

```

## <environment: 0x563914e762e0>
##
## Parametric coefficients:
##           Estimate Std. Error t value Pr(>|t|)
## (Intercept)  23439.91    321.39  72.933 < 2e-16 ***
## sexmale      693.90     87.25   7.953 2.28e-15 ***
## siteousAvanto -3113.29    341.20  -9.125 < 2e-16 ***
## siteousPrisma -3801.22    518.06  -7.337 2.56e-13 ***
## siteousSkyra -2338.99    329.62  -7.096 1.48e-12 ***
## siteUKB      -2056.22    305.31  -6.735 1.84e-11 ***
## income_scaled  74.69     114.18   0.654  0.513
## education_scaled 307.89    126.48   2.434  0.015 *
## icv          1576.61     40.89  38.555 < 2e-16 ***
## ---
## Signif. codes:  0 '***' 0.001 '**' 0.01 '*' 0.05 '.' 0.1 ' ' 1
##
## Approximate significance of smooth terms:
##           edf Ref.df    F p-value
## s(bl_age)      3.092  3.092  8.732 6.36e-06 ***
## s(bl_age):sleep_z 2.000  2.000  0.022  0.978
## s(bl_age):time  3.169  3.169 22.780 < 2e-16 ***
## s(sleep_z):time  1.000  1.000  2.254  0.133
## ---
## Signif. codes:  0 '***' 0.001 '**' 0.01 '*' 0.05 '.' 0.1 ' ' 1
##
## R-sq.(adj) =  0.502
## lmer.REML = 76010 Scale est. = 1.0221e+05 n = 4636

```

Below are plots of a plot of  $s(\text{bl\_age})$ ,  $s(\text{bl\_age}):\text{sleep\_z}$ ,  $s(\text{bl\_age}):\text{time}$ , and  $s(\text{sleep\_z}):\text{time}$ . For  $s(\text{sleep\_z}):\text{time}$ , roughly, if we cannot fit a straight line through the confidence bands, there is evidence that the effect of time depends on sleep duration. It is correct that the confidence interval is zero at one point along the axis; this happens because we do not include the main effect.

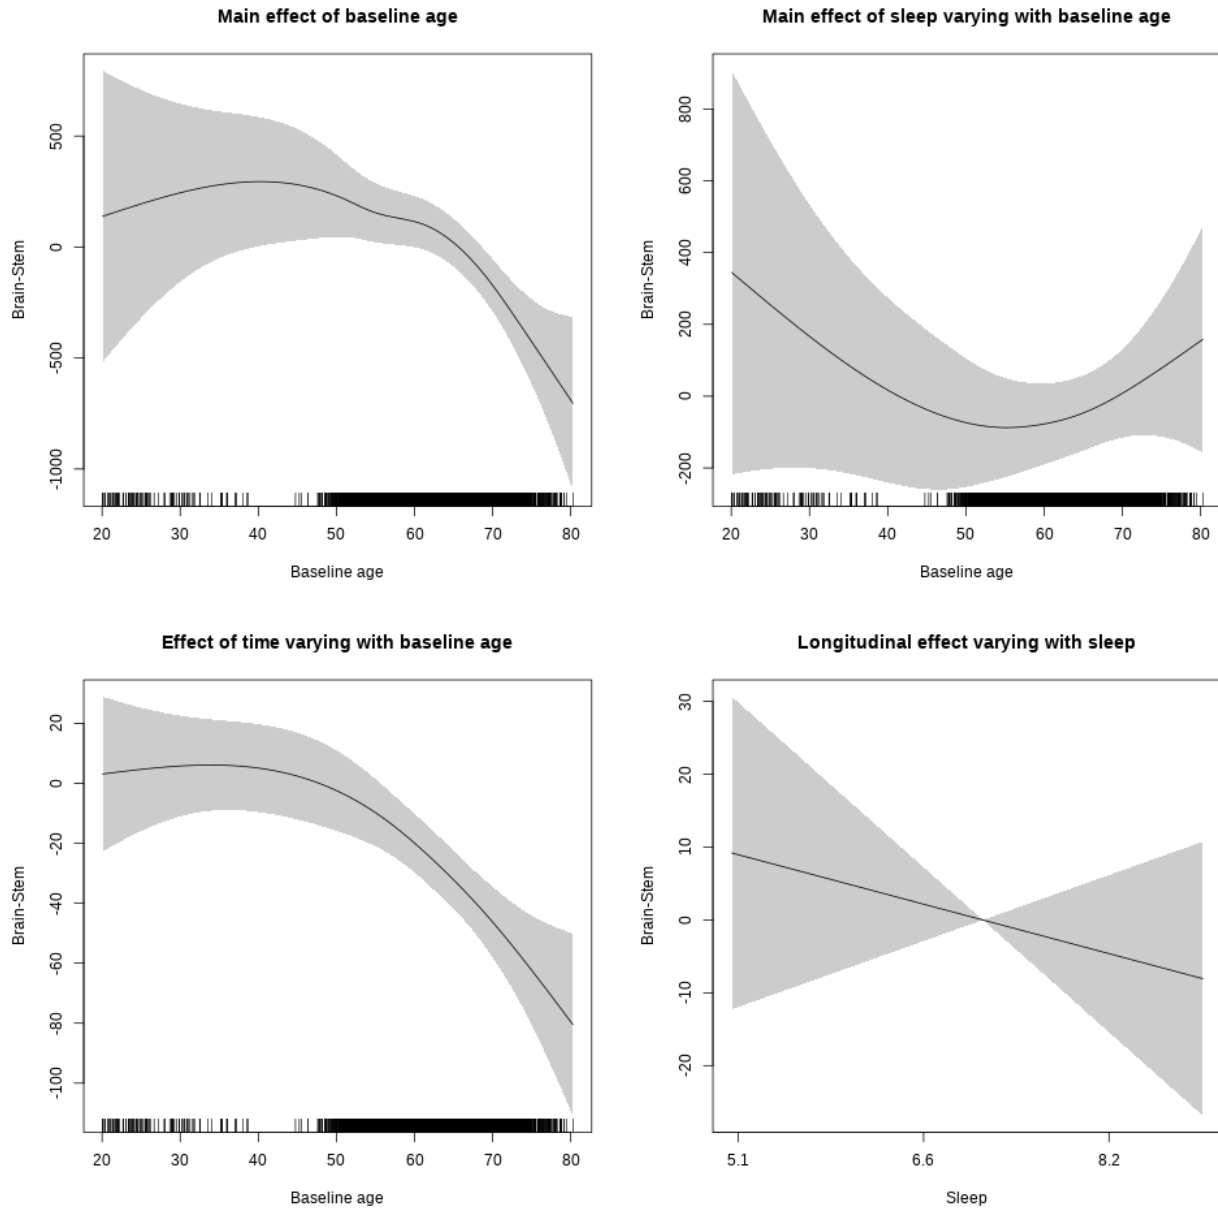

**Restricted to sleep  $\geq 5$  and  $\leq 9$  hours** Below is the row for `s(sleep_z):time` from the model output.

```
## s(sleep_z):time  1.000  1.000  0.734  0.392
```

Below are plots of a plot of `s(bl_age)`, `s(bl_age):sleep_z`, `s(bl_age):time`, and `s(sleep_z):time`. For `s(sleep_z):time`, roughly, if we cannot fit a straight line through the confidence bands, there is evidence that the effect of time depends on sleep duration. It is correct that the confidence interval is zero at one point along the axis; this happens because we do not include the main effect.



## Controlling for BMI

**Full data** Below is the model output. The term `s(sleep_z):time` is probably what we care most about.

```
##
## Family: gaussian
## Link function: identity
##
## Formula:
## value ~ sex + site + bmi + icv + s(bl_age, k = 10, bs = "cr") +
##   s(bl_age, by = sleep_z, bs = "cr") + s(bl_age, by = time,
##   k = 5, bs = "cr") + s(sleep_z, by = time, k = 5, bs = "cr",
##   pc = 0)
```

```

## <environment: 0x563910d47f30>
##
## Parametric coefficients:
##           Estimate Std. Error t value Pr(>|t|)
## (Intercept) 21243.187   276.915  76.714 < 2e-16 ***
## sexmale      695.147    80.404   8.646 < 2e-16 ***
## siteousPrisma -715.468  256.576  -2.789 0.00531 **
## siteousSkyra  763.039    82.789   9.217 < 2e-16 ***
## siteUCAM     -181.974  203.157  -0.896 0.37044
## siteUKB      885.031   184.853   4.788 1.73e-06 ***
## siteUmU     -1019.589  235.504  -4.329 1.52e-05 ***
## bmi          -17.571    8.505   -2.066 0.03888 *
## icv          1540.970   37.754  40.816 < 2e-16 ***
## ---
## Signif. codes:  0 '***' 0.001 '**' 0.01 '*' 0.05 '.' 0.1 ' ' 1
##
## Approximate significance of smooth terms:
##           edf Ref.df   F p-value
## s(bl_age)      5.143  5.143 10.661 <2e-16 ***
## s(bl_age):sleep_z 2.000  2.000  0.962  0.382
## s(bl_age):time  3.276  3.276 44.097 <2e-16 ***
## s(sleep_z):time 1.000  1.000  1.078  0.299
## ---
## Signif. codes:  0 '***' 0.001 '**' 0.01 '*' 0.05 '.' 0.1 ' ' 1
##
## R-sq.(adj) = 0.516
## lmer.REML = 88421 Scale est. = 97997 n = 5398

```

Below are plots of a plot of `s(bl_age)`, `s(bl_age):sleep_z`, `s(bl_age):time`, and `s(sleep_z):time`. For `s(sleep_z):time`, roughly, if we cannot fit a straight line through the confidence bands, there is evidence that the effect of time depends on sleep duration. It is correct that the confidence interval is zero at one point along the axis; this happens because we do not include the main effect.

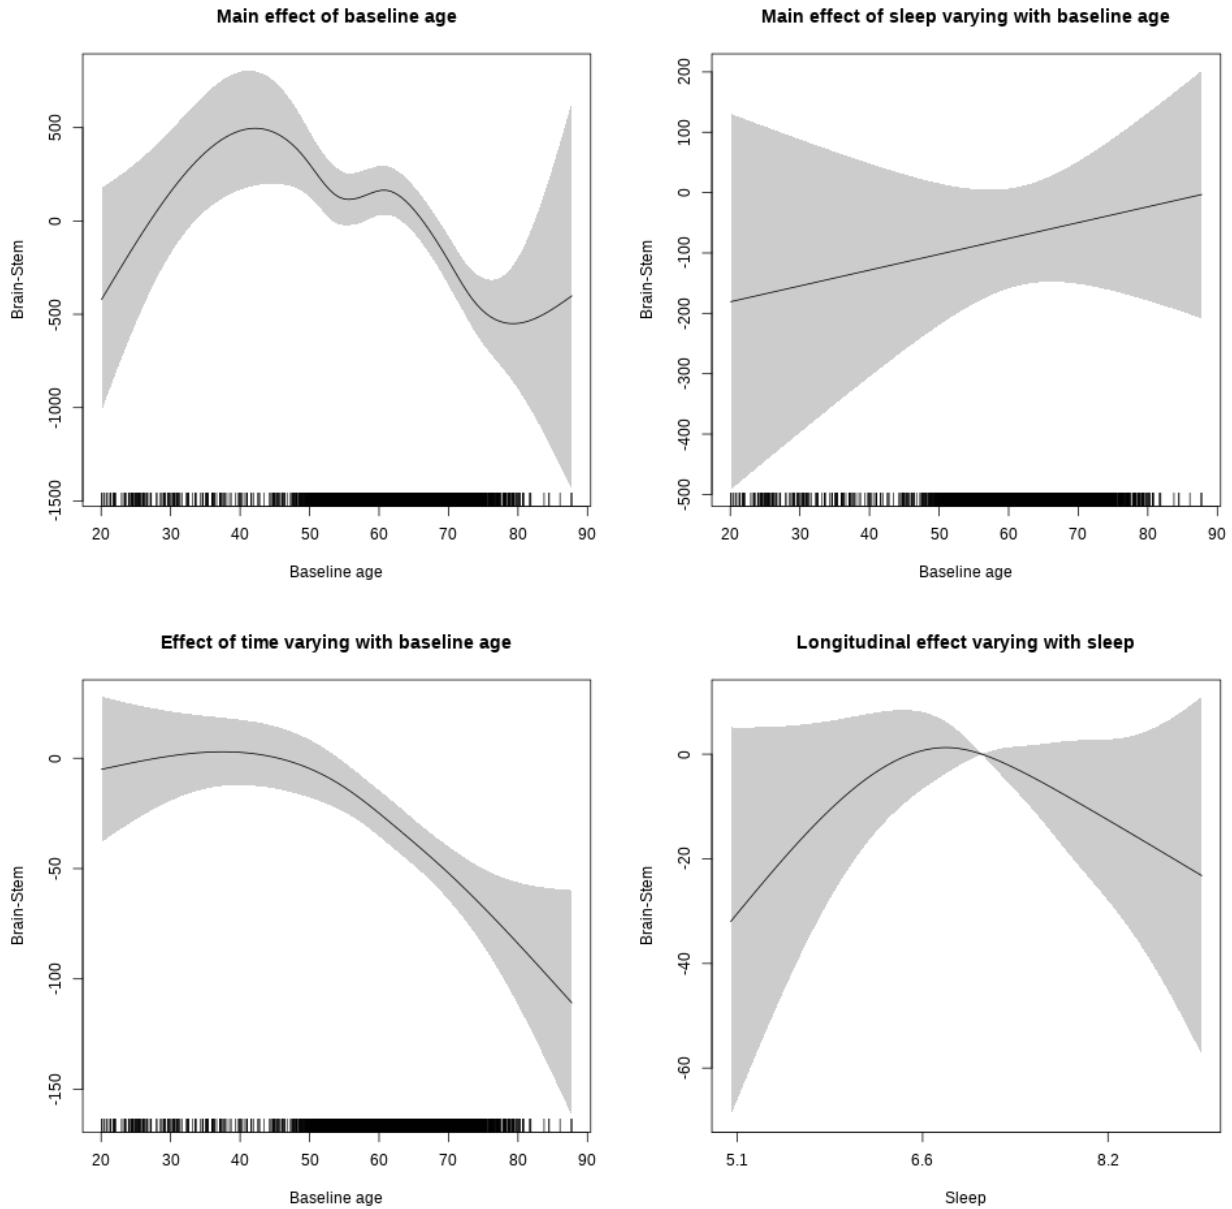

**Restricted to sleep  $\geq 5$  and  $\leq 9$  hours** Below is the row for `s(sleep_z):time` from the model output.

```
## s(sleep_z):time  2.189  2.189  1.998  0.134
```

Below are plots of a plot of `s(bl_age)`, `s(bl_age):sleep_z`, `s(bl_age):time`, and `s(sleep_z):time`. For `s(sleep_z):time`, roughly, if we cannot fit a straight line through the confidence bands, there is evidence that the effect of time depends on sleep duration. It is correct that the confidence interval is zero at one point along the axis; this happens because we do not include the main effect.



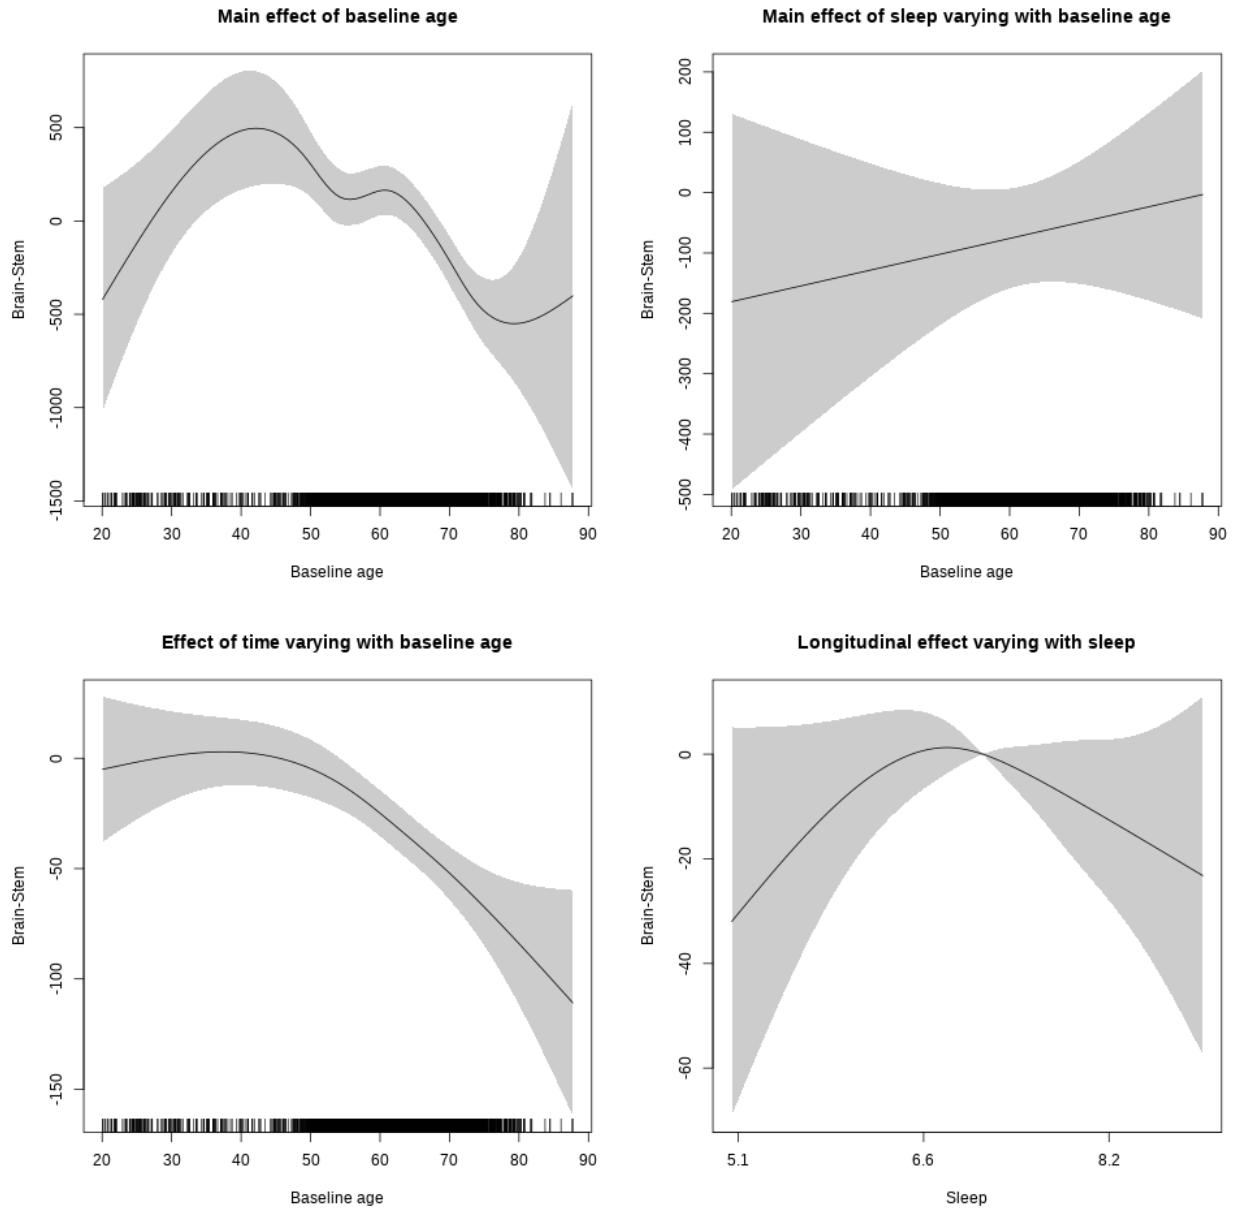

## Controlling for depression

**Full data** Below is the model output. The term `s(sleep_z):time` is probably what we care most about.

```
##
## Family: gaussian
## Link function: identity
##
## Formula:
## value ~ sex + site + depression + icv + s(bl_age, k = 10, bs = "cr") +
##   s(bl_age, by = sleep_z, bs = "cr") + +s(bl_age, by = time,
##     k = 5, bs = "cr") + s(sleep_z, by = time, k = 5, bs = "cr",
##     pc = 0)
```

```

## <environment: 0x5639141b54e0>
##
## Parametric coefficients:
##           Estimate Std. Error t value Pr(>|t|)
## (Intercept) 23229.29    153.31 151.517 < 2e-16 ***
## sexmale      693.60     79.87   8.684 < 2e-16 ***
## siteousAvanto -2209.19   304.66  -7.251 4.68e-13 ***
## siteousPrisma -2684.20   421.29  -6.371 2.02e-10 ***
## siteousSkyra -1233.83   284.56  -4.336 1.48e-05 ***
## siteUCAM     -2509.35   188.97 -13.279 < 2e-16 ***
## siteUKB      -1531.88   141.97 -10.790 < 2e-16 ***
## siteUmU      -3223.73   228.40 -14.115 < 2e-16 ***
## depression   -582.50   286.66  -2.032 0.0422 *
## icv          1446.86    36.76  39.363 < 2e-16 ***
## ---
## Signif. codes:  0 '***' 0.001 '**' 0.01 '*' 0.05 '.' 0.1 ' ' 1
##
## Approximate significance of smooth terms:
##           edf Ref.df      F p-value
## s(bl_age)      5.456  5.456 12.681 <2e-16 ***
## s(bl_age):sleep_z 2.000  2.000  0.874  0.417
## s(bl_age):time  3.119  3.119 46.150 <2e-16 ***
## s(sleep_z):time 1.688  1.688  1.421  0.142
## ---
## Signif. codes:  0 '***' 0.001 '**' 0.01 '*' 0.05 '.' 0.1 ' ' 1
##
## R-sq.(adj) = 0.491
## lmer.REML = 92925 Scale est. = 97038 n = 5665

```

Below are plots of a plot of `s(bl_age)`, `s(bl_age):sleep_z`, `s(bl_age):time`, and `s(sleep_z):time`. For `s(sleep_z):time`, roughly, if we cannot fit a straight line through the confidence bands, there is evidence that the effect of time depends on sleep duration. It is correct that the confidence interval is zero at one point along the axis; this happens because we do not include the main effect.

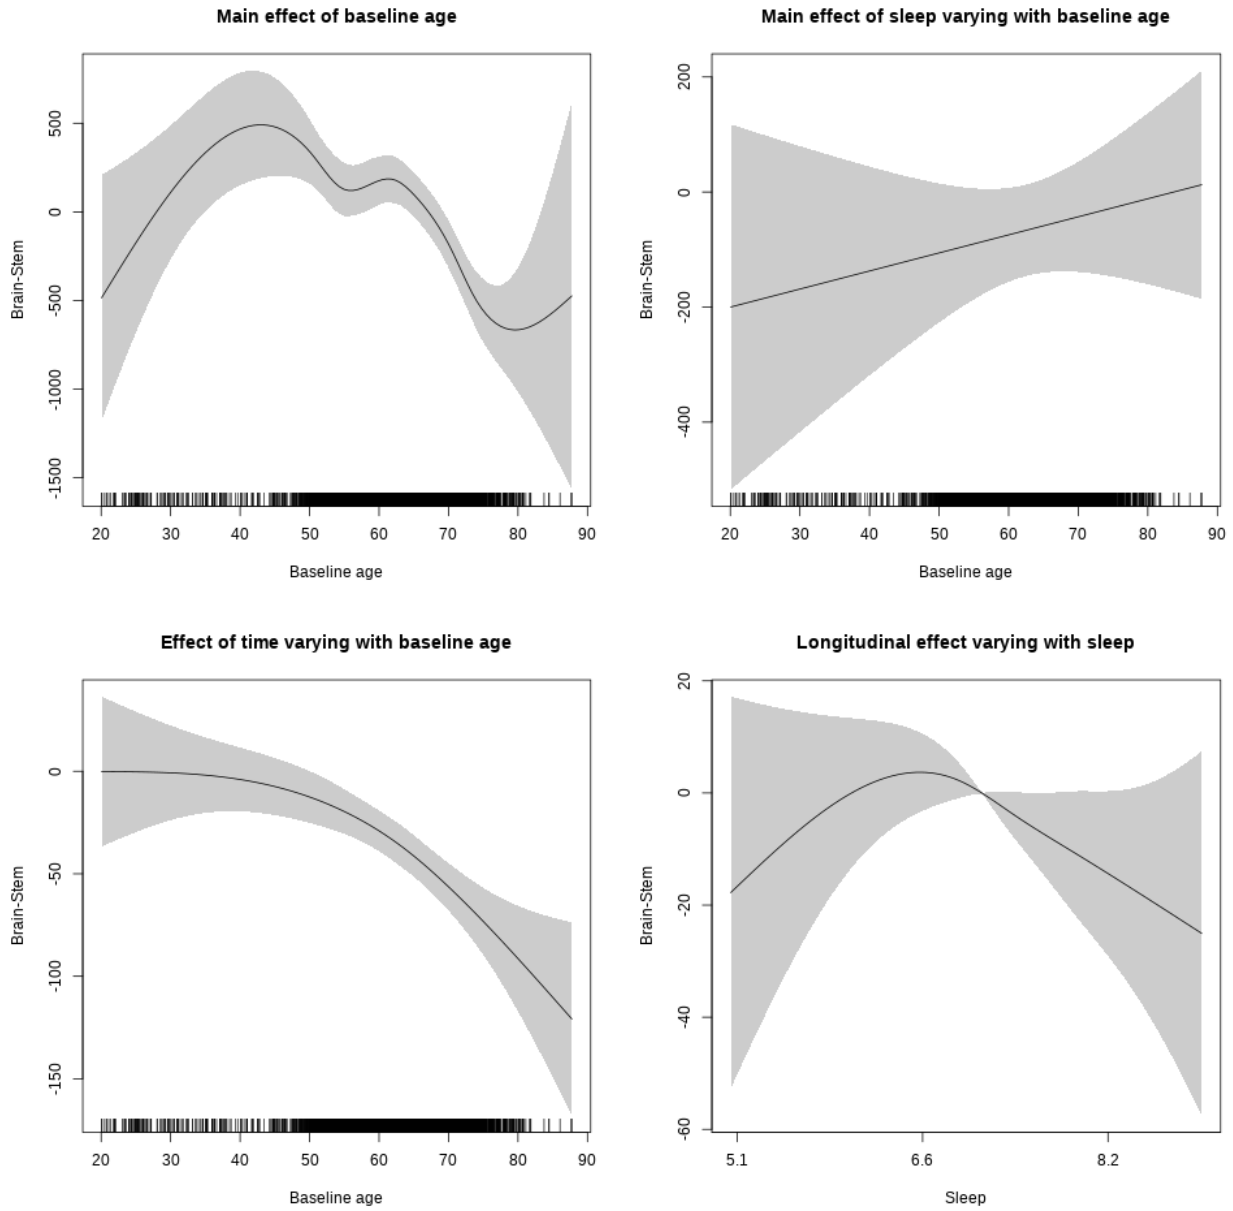

**Restricted to sleep  $\geq 5$  and  $\leq 9$  hours** Below is the row for `s(sleep_z):time` from the model output.

```
## s(sleep_z):time 2.172 2.172 2.289 0.123
```

Below are plots of a plot of `s(bl_age)`, `s(bl_age):sleep_z`, `s(bl_age):time`, and `s(sleep_z):time`. For `s(sleep_z):time`, roughly, if we cannot fit a straight line through the confidence bands, there is evidence that the effect of time depends on sleep duration. It is correct that the confidence interval is zero at one point along the axis; this happens because we do not include the main effect.

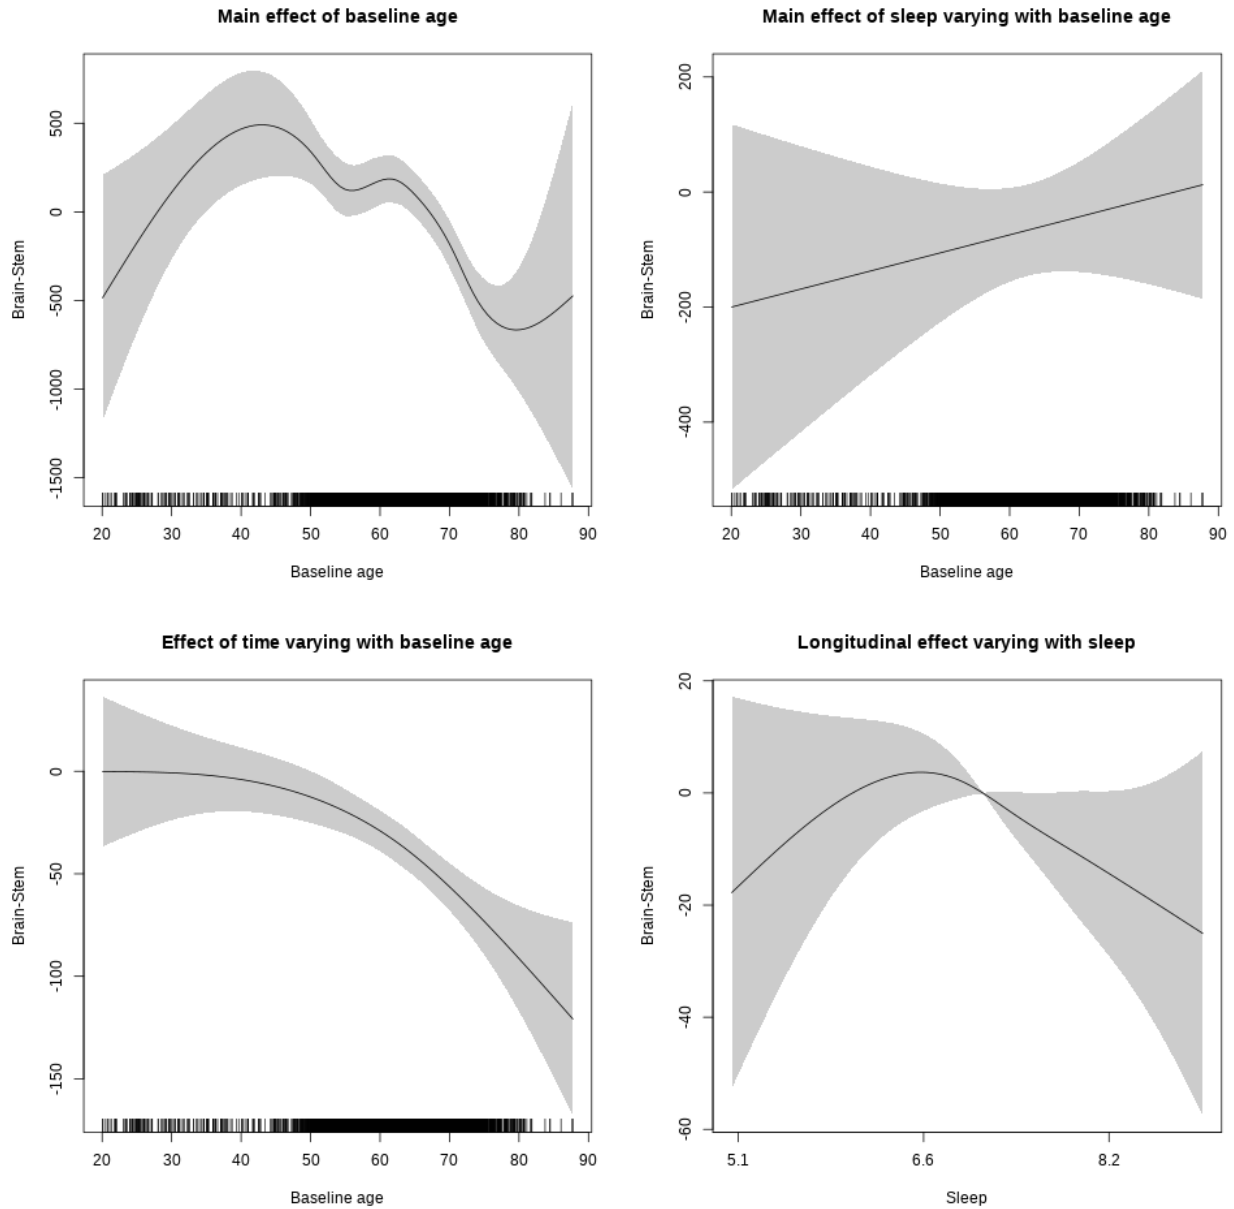

### Controlling for sleep quality

**Full data** Below is the model output. The term `s(sleep_z):time` is probably what we care most about.

```
##
## Family: gaussian
## Link function: identity
##
## Formula:
## value ~ X + s(bl_age, k = 10, bs = "cr") + s(bl_age, by = sleep_z,
##       bs = "cr") + s(bl_age, by = time, k = 5, bs = "cr") + s(sleep_z,
##       by = time, k = 5, bs = "cr", pc = 0)
## <environment: 0x5639110937a0>
```

```

##
## Parametric coefficients:
##               Estimate Std. Error t value Pr(>|t|)
## (Intercept)    20466.09    259.53  78.858 < 2e-16 ***
## Xsexmale       2315.65     97.31  23.797 < 2e-16 ***
## XsiteousAvanto  506.72    247.38   2.048 0.04059 *
## XsiteousPrisma  588.28    350.97   1.676 0.09378 .
## XsiteousSkyra   710.96    247.71   2.870 0.00412 **
## XsiteUB        -729.86    394.94  -1.848 0.06467 .
## XsiteUCAM      -199.06    253.86  -0.784 0.43300
## XsiteUKB       858.54    794.90   1.080 0.28018
## XsiteUmU      -1839.66    282.54  -6.511 8.32e-11 ***
## Xukb_dummy:sleep_accel  30.69     61.55   0.499 0.61801
## Xukb_dummy:chronotype  11.93     81.52   0.146 0.88370
## Xukb_dummy:dozing    70.58    168.19   0.420 0.67477
## Xukb_dummy:sleeplessness -285.45   104.83  -2.723 0.00649 **
## Xukb_dummy:snoring   148.52    148.57   1.000 0.31754
## Xukb_dummy:gettingup  -86.35    114.04  -0.757 0.44900
## Xnotukb_dummy:PSQI_Global -53.65     32.16  -1.668 0.09530 .
## ---
## Signif. codes:  0 '***' 0.001 '**' 0.01 '*' 0.05 '.' 0.1 ' ' 1
##
## Approximate significance of smooth terms:
##               edf Ref.df      F p-value
## s(bl_age)      3.147  3.147 14.890 < 2e-16 ***
## s(bl_age):sleep_z 2.000  2.000  2.101 0.12252
## s(bl_age):time  3.502  3.502 92.190 < 2e-16 ***
## s(sleep_z):time  1.000  1.000  7.834 0.00515 **
## ---
## Signif. codes:  0 '***' 0.001 '**' 0.01 '*' 0.05 '.' 0.1 ' ' 1
##
## R-sq.(adj) =  0.304
## lmer.REML = 70279 Scale est. = 1.0422e+05 n = 4279

```

Below are plots of a plot of  $s(\text{bl\_age})$ ,  $s(\text{bl\_age}):\text{sleep\_z}$ ,  $s(\text{bl\_age}):\text{time}$ , and  $s(\text{sleep\_z}):\text{time}$ . For  $s(\text{sleep\_z}):\text{time}$ , roughly, if we cannot fit a straight line through the confidence bands, there is evidence that the effect of time depends on sleep duration. It is correct that that confidence interval is zero at one point along the axis; this happens because we do not include the main effect.

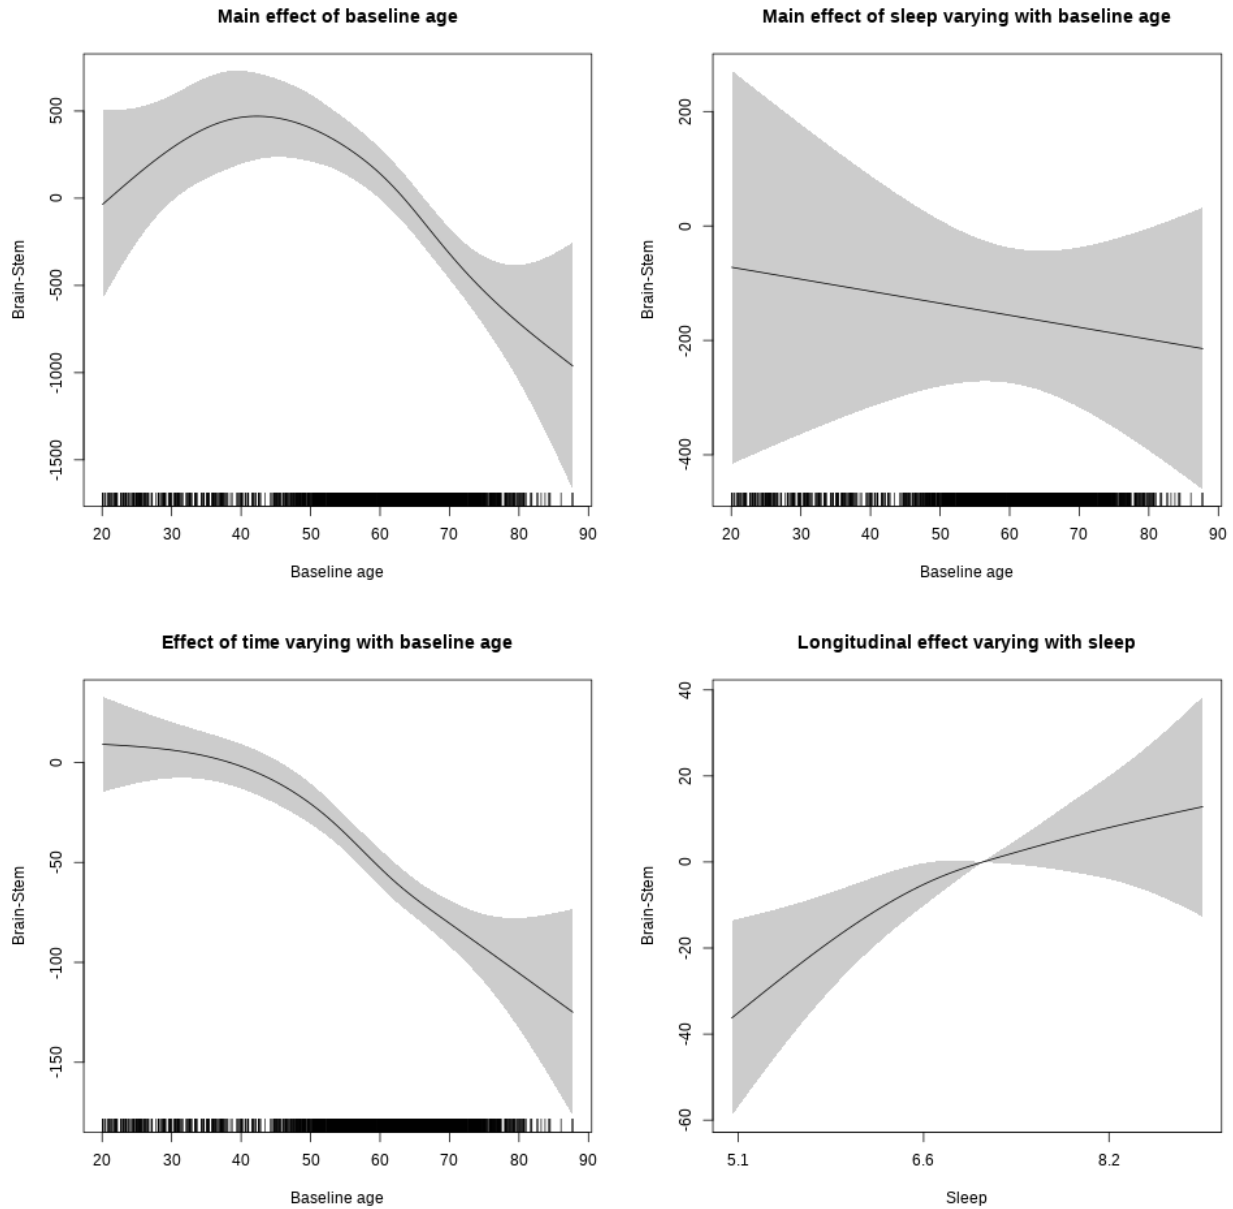

**Restricted to sleep  $\geq 5$  and  $\leq 9$  hours** Below is the row for `s(sleep_z):time` from the model output.

```
## s(sleep_z):time  1.713  1.713  7.007 0.00217 **
```

Below are plots of a plot of `s(bl_age)`, `s(bl_age):sleep_z`, `s(bl_age):time`, and `s(sleep_z):time`. For `s(sleep_z):time`, roughly, if we cannot fit a straight line through the confidence bands, there is evidence that the effect of time depends on sleep duration. It is correct that the confidence interval is zero at one point along the axis; this happens because we do not include the main effect.

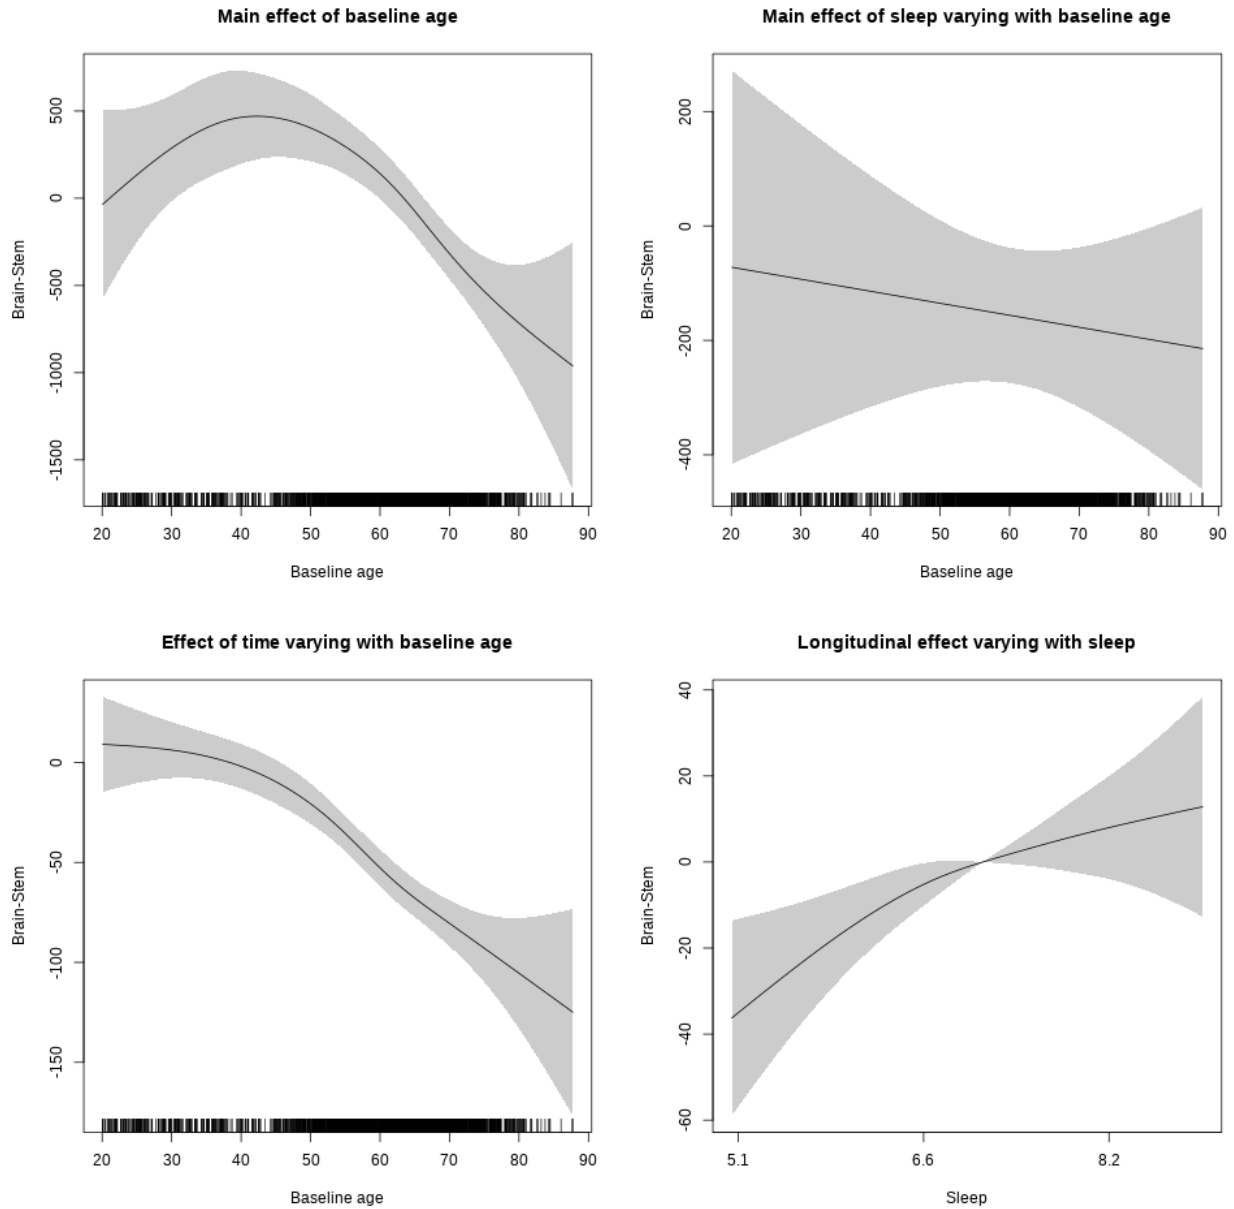

## Caudate

### Main analysis

**Full data** Below is the model output. The term `s(sleep_z):time` is probably what we care most about.

```
##
## Family: gaussian
## Link function: identity
##
## Formula:
## value ~ sex + site + icv + s(bl_age, k = 10, bs = "cr") + s(bl_age,
##   by = sleep_z, bs = "cr") + +s(bl_age, by = time, k = 5, bs = "cr") +
```

```

##      s(sleep_z, by = time, k = 5, bs = "cr", pc = 0)
## <environment: 0x563917994a50>
##
## Parametric coefficients:
##              Estimate Std. Error t value Pr(>|t|)
## (Intercept)   7795.85     54.17 143.925 < 2e-16 ***
## sexmale       57.96      27.80   2.085  0.0371 *
## siteousAvanto -760.65     66.46 -11.445 < 2e-16 ***
## siteousPrisma -326.14    134.62  -2.423  0.0154 *
## siteousSkyra  -379.47     64.79  -5.857 4.89e-09 ***
## siteUB        -651.78    127.04  -5.131 2.96e-07 ***
## siteUCAM      -660.32     68.55  -9.632 < 2e-16 ***
## siteUKB       -1099.51    51.96 -21.160 < 2e-16 ***
## siteUmU       -429.26     78.62  -5.460 4.90e-08 ***
## icv           451.20     12.91  34.951 < 2e-16 ***
## ---
## Signif. codes:  0 '***' 0.001 '**' 0.01 '*' 0.05 '.' 0.1 ' ' 1
##
## Approximate significance of smooth terms:
##              edf Ref.df    F p-value
## s(bl_age)      4.831  4.831 46.082 <2e-16 ***
## s(bl_age):sleep_z 2.235  2.235  1.272  0.2880
## s(bl_age):time  2.623  2.623 79.946 <2e-16 ***
## s(sleep_z):time  1.000  1.000  8.479  0.0036 **
## ---
## Signif. codes:  0 '***' 0.001 '**' 0.01 '*' 0.05 '.' 0.1 ' ' 1
##
## R-sq.(adj) =  0.408
## lmer.REML = 1.1988e+05  Scale est. = 22652    n = 8146

```

Below are plots of a plot of  $s(\text{bl\_age})$ ,  $s(\text{bl\_age}):\text{sleep\_z}$ ,  $s(\text{bl\_age}):\text{time}$ , and  $s(\text{sleep\_z}):\text{time}$ . For  $s(\text{sleep\_z}):\text{time}$ , roughly, if we cannot fit a straight line through the confidence bands, there is evidence that the effect of time depends on sleep duration. It is correct that the confidence interval is zero at one point along the axis; this happens because we do not include the main effect.



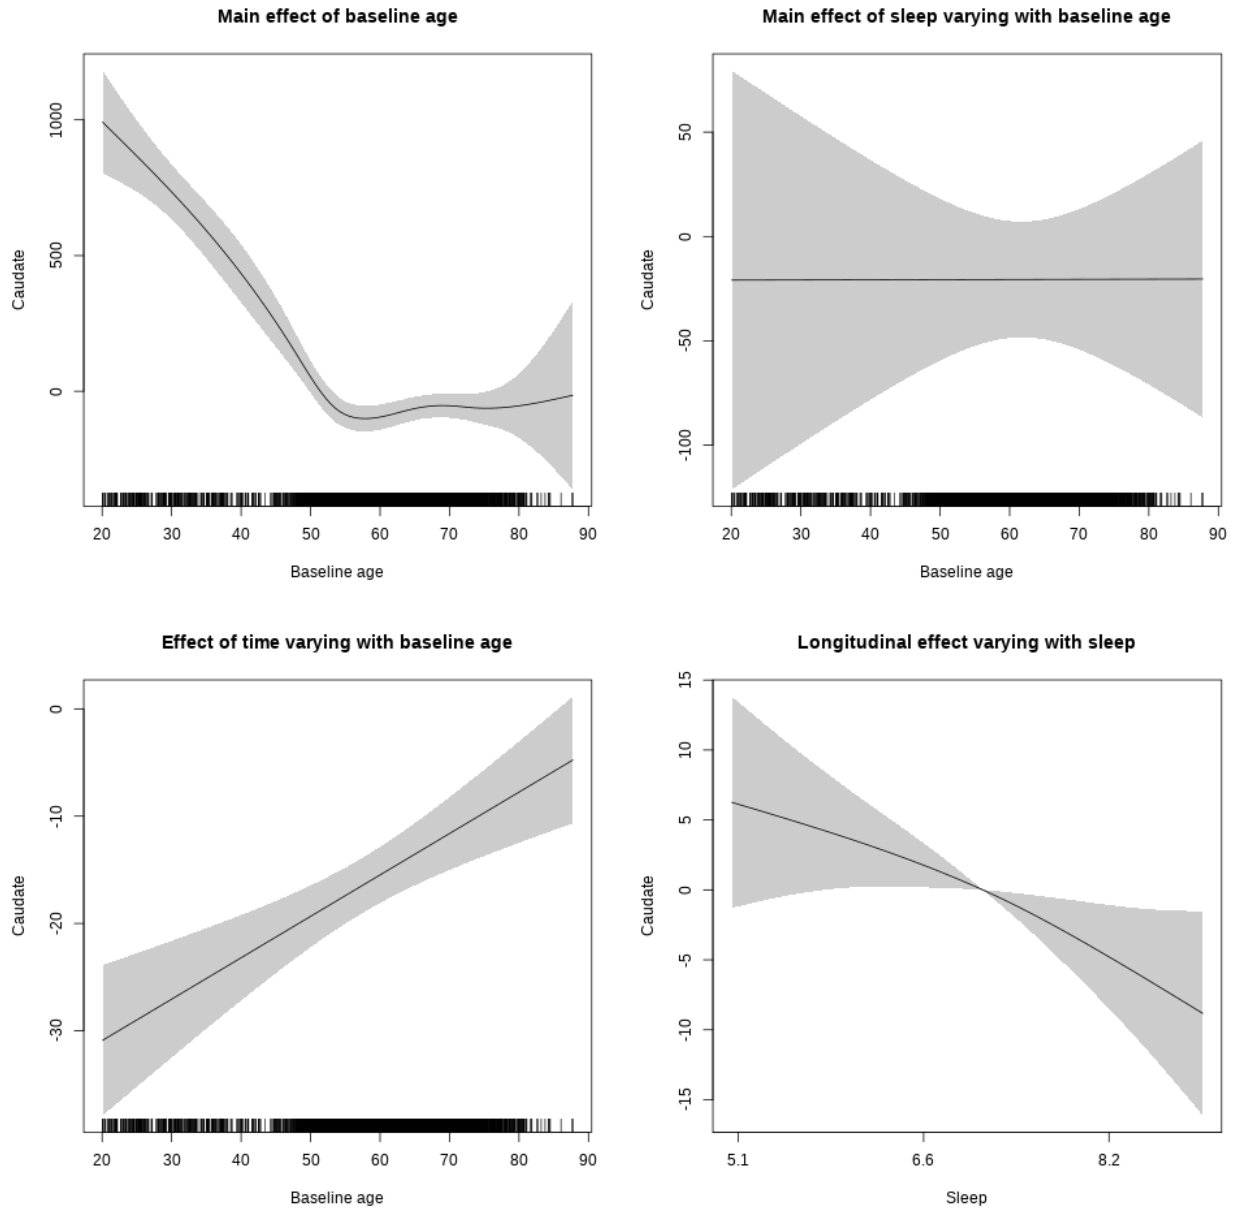

**Restricted to sleep  $\geq 5$  and  $\leq 9$  hours** Below is the row for `s(sleep_z):time` from the model output.

```
## s(sleep_z):time  1.298  1.298  4.260  0.0179 *
```

Below are plots of a plot of `s(bl_age)`, `s(bl_age):sleep_z`, `s(bl_age):time`, and `s(sleep_z):time`. For `s(sleep_z):time`, roughly, if we cannot fit a straight line through the confidence bands, there is evidence that the effect of time depends on sleep duration. It is correct that the confidence interval is zero at one point along the axis; this happens because we do not include the main effect.



### Controlling for socioeconomic status

**Full data** Below is the model output. The term `s(sleep_z):time` is probably what we care most about.

```
##
## Family: gaussian
## Link function: identity
##
## Formula:
## value ~ sex + site + income_scaled + education_scaled + icv +
##       s(bl_age, k = 10, bs = "cr") + s(bl_age, by = sleep_z, bs = "cr") +
##       +s(bl_age, by = time, k = 5, bs = "cr") + s(sleep_z, by = time,
##       k = 5, bs = "cr", pc = 0)
```

```

## <environment: 0x5639112dce10>
##
## Parametric coefficients:
##           Estimate Std. Error t value Pr(>|t|)
## (Intercept)  8223.112   131.530  62.519 < 2e-16 ***
## sexmale      -7.659     35.725  -0.214 0.830264
## siteousAvanto -1348.246   140.224  -9.615 < 2e-16 ***
## siteousPrisma -776.484    227.743  -3.409 0.000656 ***
## siteousSkyra  -934.800   134.651  -6.942 4.39e-12 ***
## siteUKB      -1609.641   124.935 -12.884 < 2e-16 ***
## income_scaled  44.750     46.594   0.960 0.336897
## education_scaled 79.499     51.480   1.544 0.122587
## icv          482.107     16.960  28.426 < 2e-16 ***
## ---
## Signif. codes:  0 '***' 0.001 '**' 0.01 '*' 0.05 '.' 0.1 ' ' 1
##
## Approximate significance of smooth terms:
##           edf Ref.df    F p-value
## s(bl_age)      3.664  3.664 17.255 <2e-16 ***
## s(bl_age):sleep_z 2.000  2.000  0.891  0.410
## s(bl_age):time  2.332  2.332 24.916 <2e-16 ***
## s(sleep_z):time 1.000  1.000  0.995  0.318
## ---
## Signif. codes:  0 '***' 0.001 '**' 0.01 '*' 0.05 '.' 0.1 ' ' 1
##
## R-sq.(adj) =  0.389
## lmer.REML = 68485  Scale est. = 21861    n = 4650

```

Below are plots of a plot of  $s(\text{bl\_age})$ ,  $s(\text{bl\_age}):\text{sleep\_z}$ ,  $s(\text{bl\_age}):\text{time}$ , and  $s(\text{sleep\_z}):\text{time}$ . For  $s(\text{sleep\_z}):\text{time}$ , roughly, if we cannot fit a straight line through the confidence bands, there is evidence that the effect of time depends on sleep duration. It is correct that the confidence interval is zero at one point along the axis; this happens because we do not include the main effect.

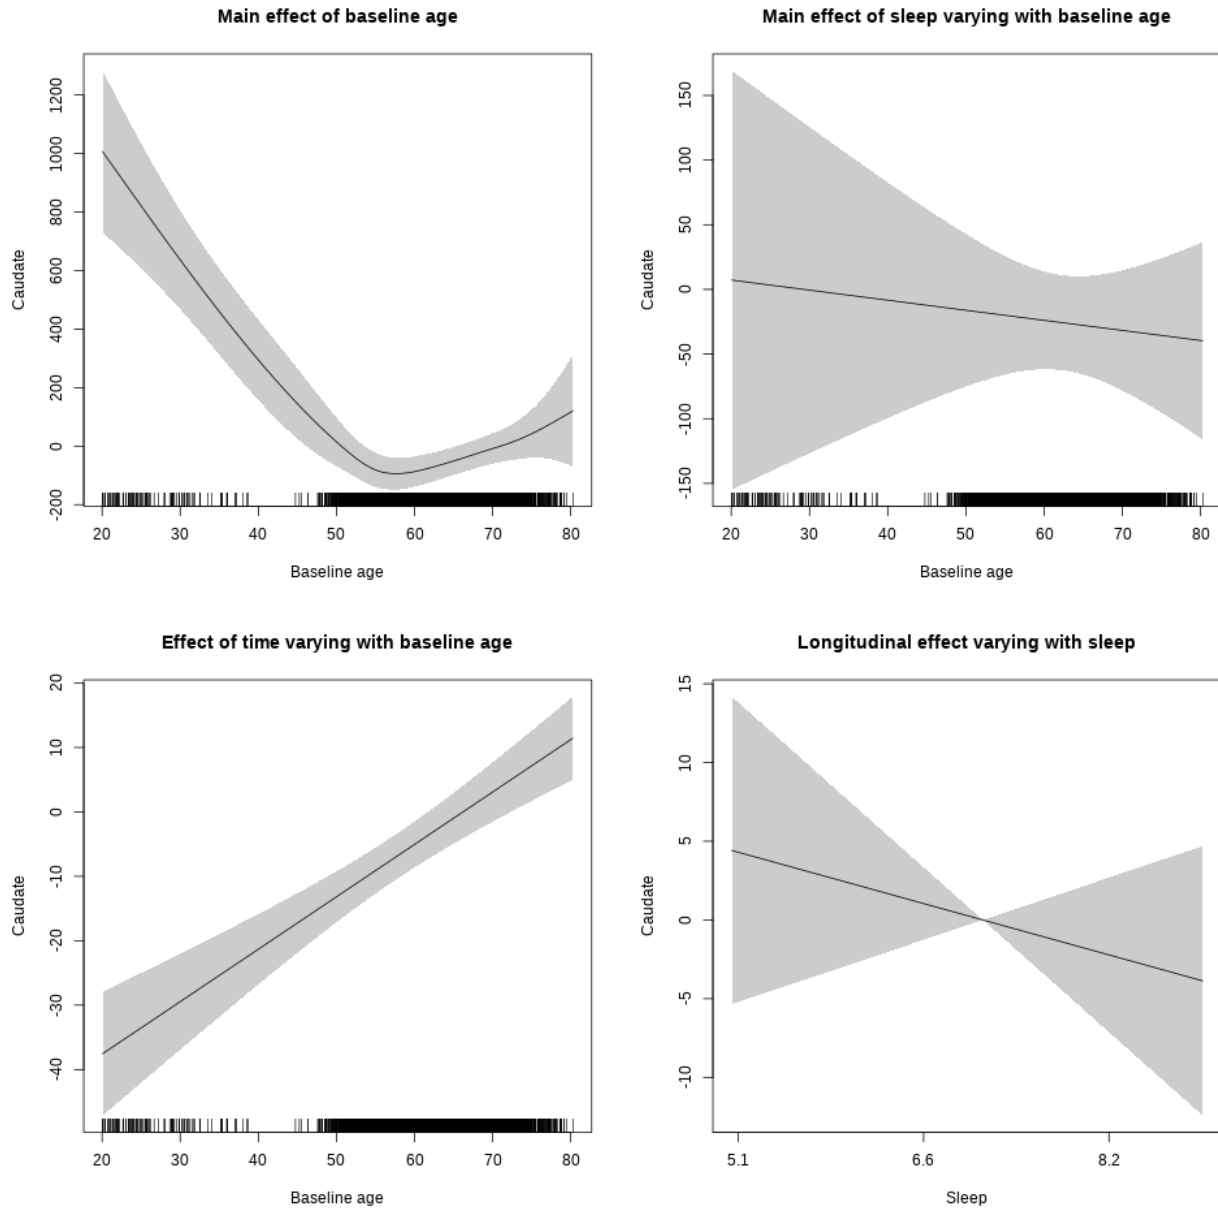

**Restricted to sleep  $\geq 5$  and  $\leq 9$  hours** Below is the row for `s(sleep_z):time` from the model output.

```
## s(sleep_z):time  1.000  1.000  0.817  0.366
```

Below are plots of a plot of `s(bl_age)`, `s(bl_age):sleep_z`, `s(bl_age):time`, and `s(sleep_z):time`. For `s(sleep_z):time`, roughly, if we cannot fit a straight line through the confidence bands, there is evidence that the effect of time depends on sleep duration. It is correct that the confidence interval is zero at one point along the axis; this happens because we do not include the main effect.



## Controlling for BMI

**Full data** Below is the model output. The term `s(sleep_z):time` is probably what we care most about.

```
##
## Family: gaussian
## Link function: identity
##
## Formula:
## value ~ sex + site + bmi + icv + s(bl_age, k = 10, bs = "cr") +
##   s(bl_age, by = sleep_z, bs = "cr") + +s(bl_age, by = time,
##     k = 5, bs = "cr") + s(sleep_z, by = time, k = 5, bs = "cr",
##     pc = 0)
```

```

## <environment: 0x56390aaf10d8>
##
## Parametric coefficients:
##           Estimate Std. Error t value Pr(>|t|)
## (Intercept)  6764.562   114.848  58.900 < 2e-16 ***
## sexmale      5.097     33.200   0.154  0.87800
## siteousPrisma 361.350   122.929   2.940  0.00330 **
## siteousSkyra 356.842    39.424   9.051 < 2e-16 ***
## siteUCAM     169.074    84.745   1.995  0.04608 *
## siteUKB     -292.756    77.822  -3.762  0.00017 ***
## siteUmU     390.952    98.225   3.980 6.98e-05 ***
## bmi         9.065     3.488   2.599  0.00937 **
## icv         482.201    15.838  30.445 < 2e-16 ***
## ---
## Signif. codes:  0 '***' 0.001 '**' 0.01 '*' 0.05 '.' 0.1 ' ' 1
##
## Approximate significance of smooth terms:
##           edf Ref.df      F p-value
## s(bl_age)      4.336  4.336 29.985 < 2e-16 ***
## s(bl_age):sleep_z 2.000  2.000  1.978  0.13847
## s(bl_age):time  2.000  2.000 47.244 < 2e-16 ***
## s(sleep_z):time 1.000  1.000 10.391  0.00127 **
## ---
## Signif. codes:  0 '***' 0.001 '**' 0.01 '*' 0.05 '.' 0.1 ' ' 1
##
## R-sq.(adj) =  0.41
## lmer.REML = 79869 Scale est. = 22658      n = 5412

```

Below are plots of a plot of  $s(\text{bl\_age})$ ,  $s(\text{bl\_age}):\text{sleep\_z}$ ,  $s(\text{bl\_age}):\text{time}$ , and  $s(\text{sleep\_z}):\text{time}$ . For  $s(\text{sleep\_z}):\text{time}$ , roughly, if we cannot fit a straight line through the confidence bands, there is evidence that the effect of time depends on sleep duration. It is correct that the confidence interval is zero at one point along the axis; this happens because we do not include the main effect.

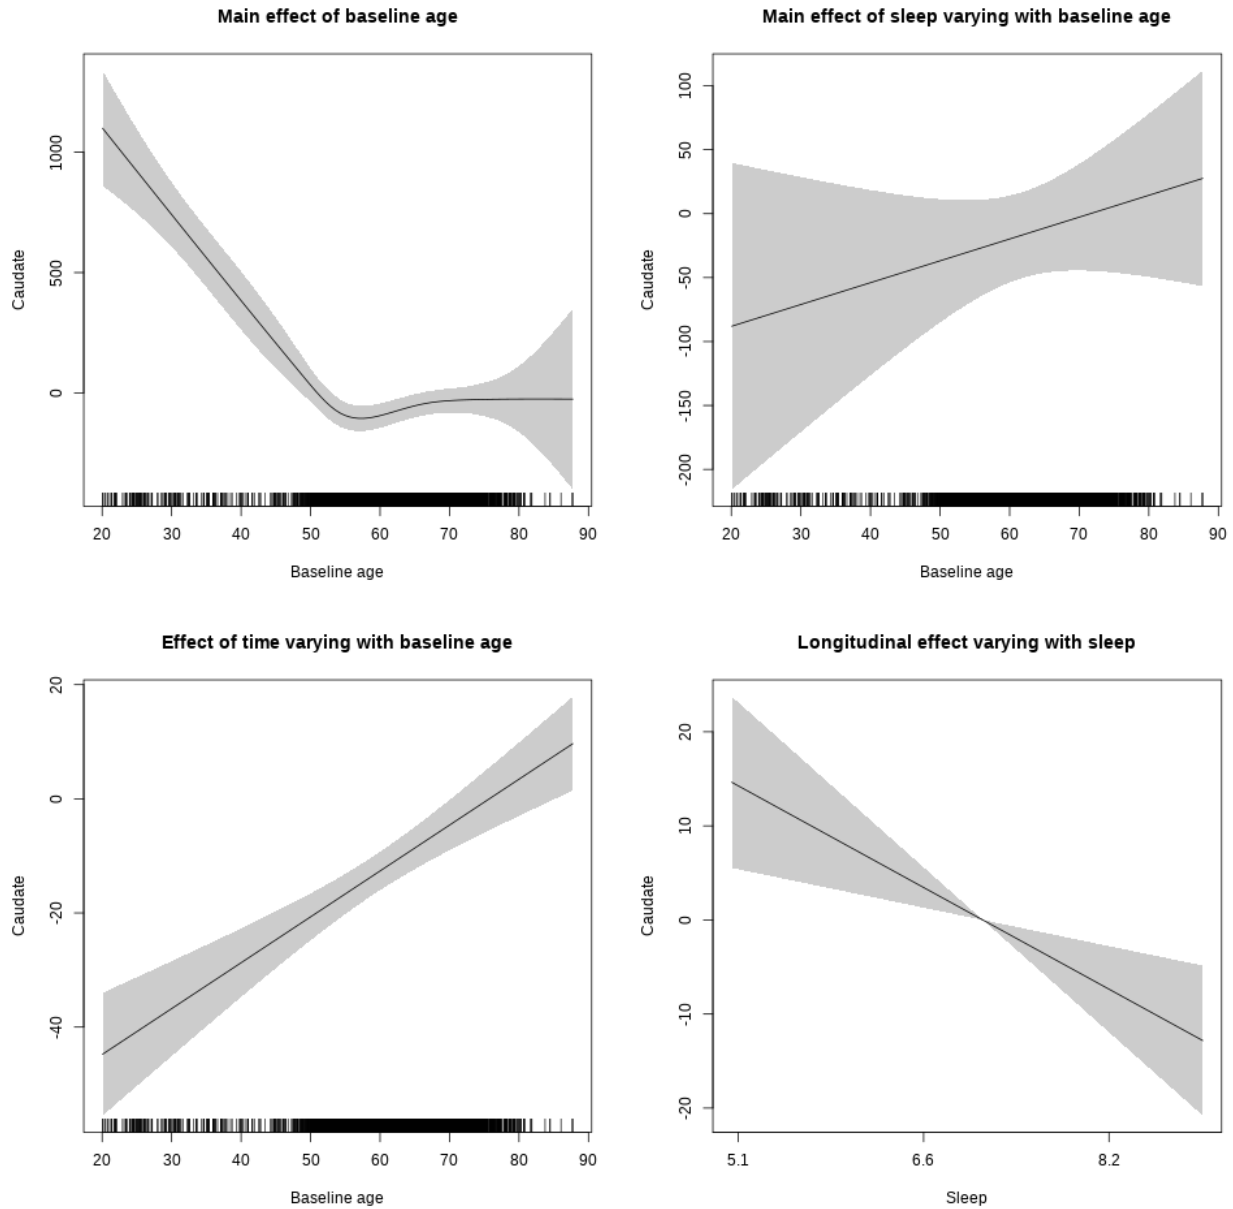

**Restricted to sleep  $\geq 5$  and  $\leq 9$  hours** Below is the row for `s(sleep_z):time` from the model output.

```
## s(sleep_z):time 1.000 1.000 10.343 0.00131 **
```

Below are plots of a plot of `s(bl_age)`, `s(bl_age):sleep_z`, `s(bl_age):time`, and `s(sleep_z):time`. For `s(sleep_z):time`, roughly, if we cannot fit a straight line through the confidence bands, there is evidence that the effect of time depends on sleep duration. It is correct that the confidence interval is zero at one point along the axis; this happens because we do not include the main effect.

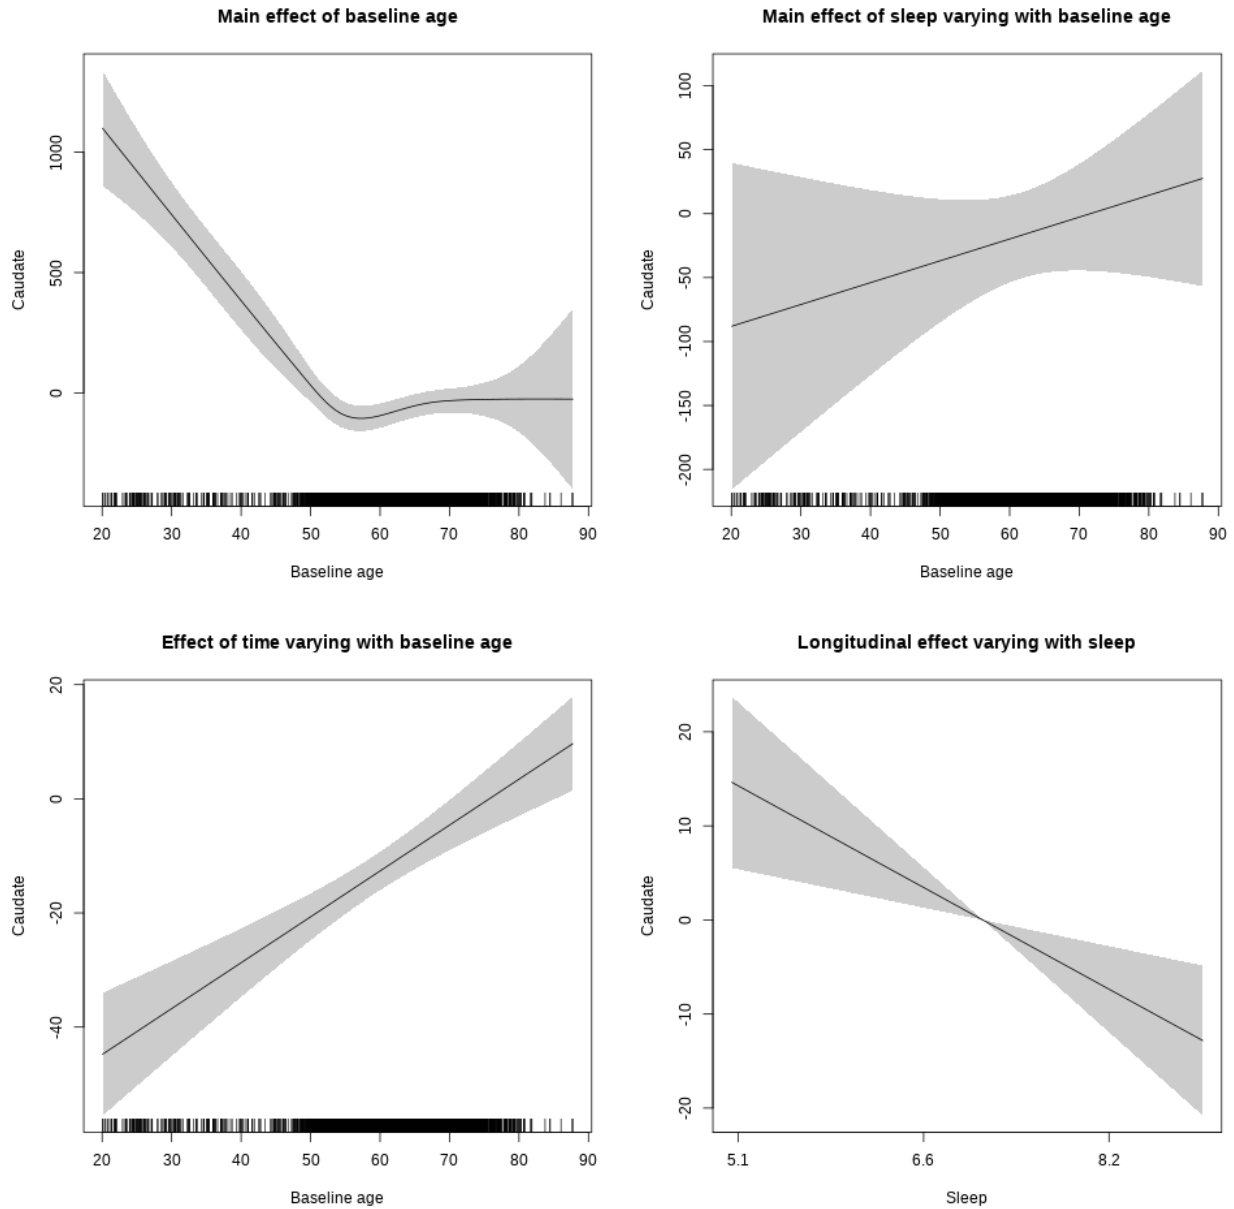

## Controlling for depression

**Full data** Below is the model output. The term `s(sleep_z):time` is probably what we care most about.

```
##
## Family: gaussian
## Link function: identity
##
## Formula:
## value ~ sex + site + depression + icv + s(bl_age, k = 10, bs = "cr") +
##       s(bl_age, by = sleep_z, bs = "cr") + +s(bl_age, by = time,
##       k = 5, bs = "cr") + s(sleep_z, by = time, k = 5, bs = "cr",
##       pc = 0)
```



```

## <environment: 0x563910f8b5a0>
##
## Parametric coefficients:
##           Estimate Std. Error t value Pr(>|t|)
## (Intercept)  7718.61      62.44 123.615 < 2e-16 ***
## sexmale      5.03       32.60   0.154  0.8774
## siteousAvanto -652.73    126.33  -5.167 2.46e-07 ***
## siteousPrisma -315.51    189.11  -1.668  0.0953 .
## siteousSkyra  -188.65    115.28  -1.636  0.1018
## siteUCAM     -580.74     76.31  -7.611 3.17e-14 ***
## siteUKB     -1034.91    57.67 -17.946 < 2e-16 ***
## siteUmU     -415.77     92.45  -4.497 7.02e-06 ***
## depression   201.67    115.91   1.740  0.0819 .
## icv         473.95     15.27  31.036 < 2e-16 ***
## ---
## Signif. codes:  0 '***' 0.001 '**' 0.01 '*' 0.05 '.' 0.1 ' ' 1
##
## Approximate significance of smooth terms:
##           edf Ref.df      F p-value
## s(bl_age)      4.759  4.759 17.656 < 2e-16 ***
## s(bl_age):sleep_z 2.780  2.780  2.494  0.118
## s(bl_age):time  2.000  2.000 44.080 < 2e-16 ***
## s(sleep_z):time  1.000  1.000 18.514 1.75e-05 ***
## ---
## Signif. codes:  0 '***' 0.001 '**' 0.01 '*' 0.05 '.' 0.1 ' ' 1
##
## R-sq.(adj) =  0.395
## lmer.REML = 83929  Scale est. = 23006    n = 5679

```

Below are plots of a plot of `s(bl_age)`, `s(bl_age):sleep_z`, `s(bl_age):time`, and `s(sleep_z):time`. For `s(sleep_z):time`, roughly, if we cannot fit a straight line through the confidence bands, there is evidence that the effect of time depends on sleep duration. It is correct the that confidence interval is zero at one point along the axis; this happens because we do not include the main effect.

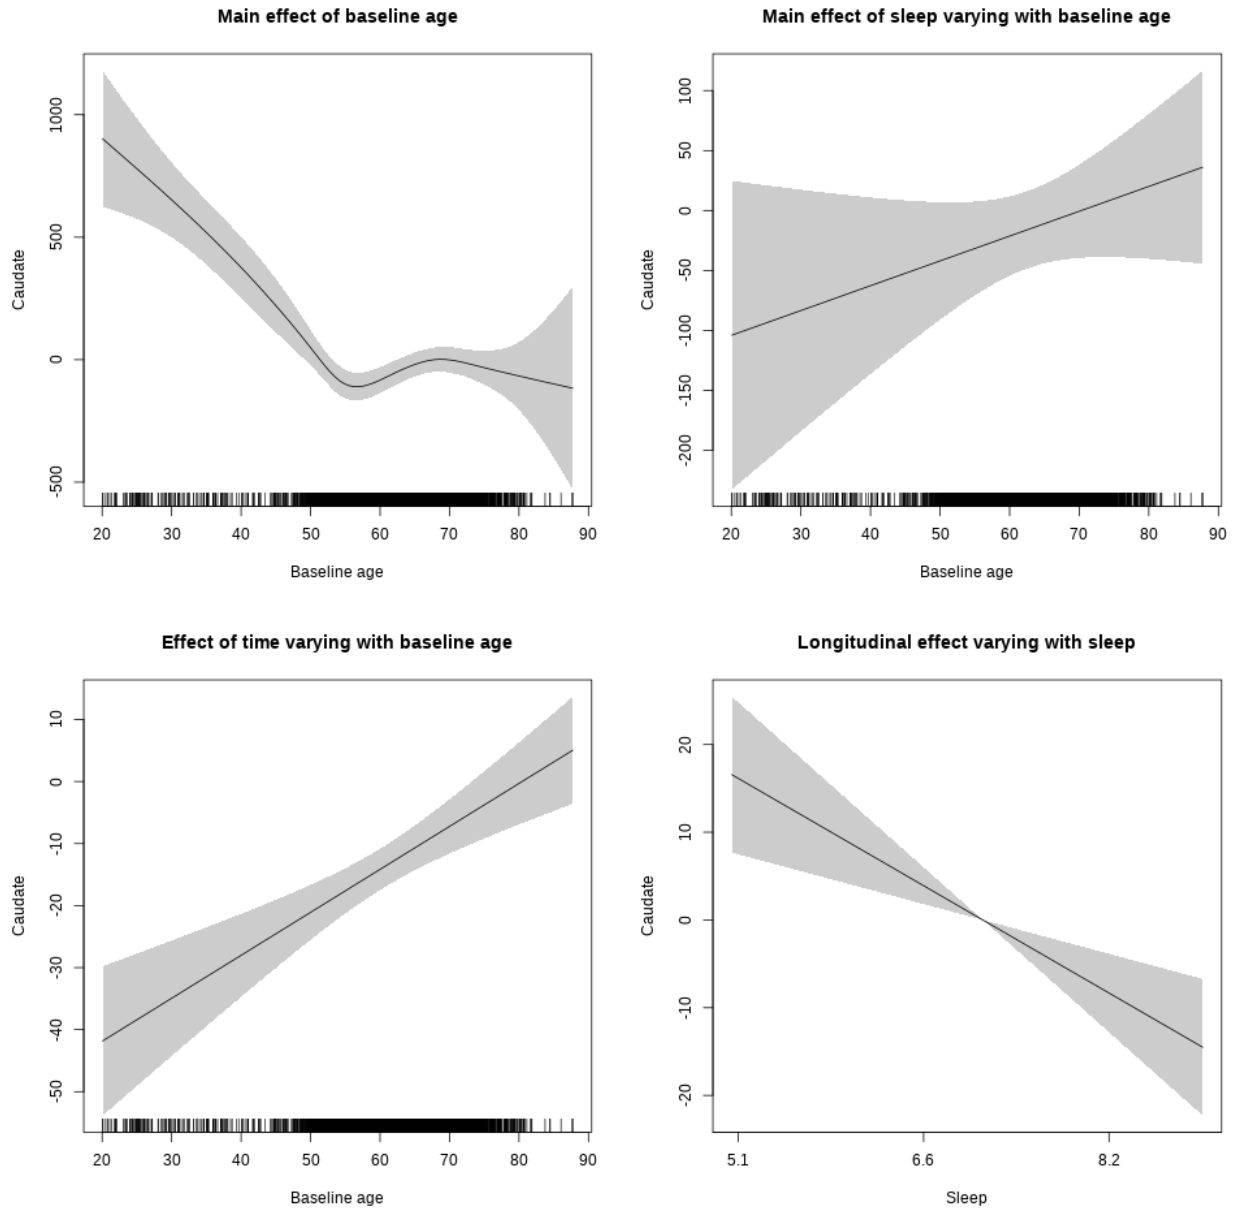

**Restricted to sleep  $\geq 5$  and  $\leq 9$  hours** Below is the row for `s(sleep_z):time` from the model output.

```
## s(sleep_z):time 1.000 1.000 13.899 0.000195 ***
```

Below are plots of a plot of `s(bl_age)`, `s(bl_age):sleep_z`, `s(bl_age):time`, and `s(sleep_z):time`. For `s(sleep_z):time`, roughly, if we cannot fit a straight line through the confidence bands, there is evidence that the effect of time depends on sleep duration. It is correct that the confidence interval is zero at one point along the axis; this happens because we do not include the main effect.



### Controlling for sleep quality

**Full data** Below is the model output. The term `s(sleep_z):time` is probably what we care most about.

```
##
## Family: gaussian
## Link function: identity
##
## Formula:
## value ~ X + s(bl_age, k = 10, bs = "cr") + s(bl_age, by = sleep_z,
##       bs = "cr") + s(bl_age, by = time, k = 5, bs = "cr") + s(sleep_z,
##       by = time, k = 5, bs = "cr", pc = 0)
## <environment: 0x563911572570>
```

```

##
## Parametric coefficients:
##               Estimate Std. Error t value Pr(>|t|)
## (Intercept)      6962.122   108.003  64.462 < 2e-16 ***
## Xsexmale          579.793    40.401  14.351 < 2e-16 ***
## XsiteousAvanto    101.771    103.047   0.988 0.32339
## XsiteousPrisma    766.477    157.255   4.874 1.13e-06 ***
## XsiteousSkyra     332.058    103.229   3.217 0.00131 **
## XsiteUB           -146.993    164.238  -0.895 0.37084
## XsiteUCAM         41.829     105.820   0.395 0.69265
## XsiteUKB          -162.218    328.893  -0.493 0.62188
## XsiteUmU          20.577     117.599   0.175 0.86111
## Xukb_dummy:sleep_accel -8.372    25.409  -0.329 0.74180
## Xukb_dummy:chronotype -2.542    33.827  -0.075 0.94010
## Xukb_dummy:dozing   126.505    70.015   1.807 0.07086 .
## Xukb_dummy:sleeplessness -65.834    43.556  -1.511 0.13074
## Xukb_dummy:snoring   38.082    61.689   0.617 0.53705
## Xukb_dummy:gettingup -47.924    47.347  -1.012 0.31150
## Xnotukb_dummy:PSQI_Global -4.013    13.378  -0.300 0.76424
## ---
## Signif. codes:  0 '***' 0.001 '**' 0.01 '*' 0.05 '.' 0.1 ' ' 1
##
## Approximate significance of smooth terms:
##               edf Ref.df    F p-value
## s(bl_age)      3.42  3.42 33.732 < 2e-16 ***
## s(bl_age):sleep_z 2.00  2.00  1.122 0.32589
## s(bl_age):time  2.00  2.00 110.983 < 2e-16 ***
## s(sleep_z):time 1.00  1.00  8.544 0.00348 **
## ---
## Signif. codes:  0 '***' 0.001 '**' 0.01 '*' 0.05 '.' 0.1 ' ' 1
##
## R-sq.(adj) = 0.26
## lmer.REML = 63518 Scale est. = 23812 n = 4286

```

Below are plots of a plot of  $s(\text{bl\_age})$ ,  $s(\text{bl\_age}):\text{sleep\_z}$ ,  $s(\text{bl\_age}):\text{time}$ , and  $s(\text{sleep\_z}):\text{time}$ . For  $s(\text{sleep\_z}):\text{time}$ , roughly, if we cannot fit a straight line through the confidence bands, there is evidence that the effect of time depends on sleep duration. It is correct that the confidence interval is zero at one point along the axis; this happens because we do not include the main effect.

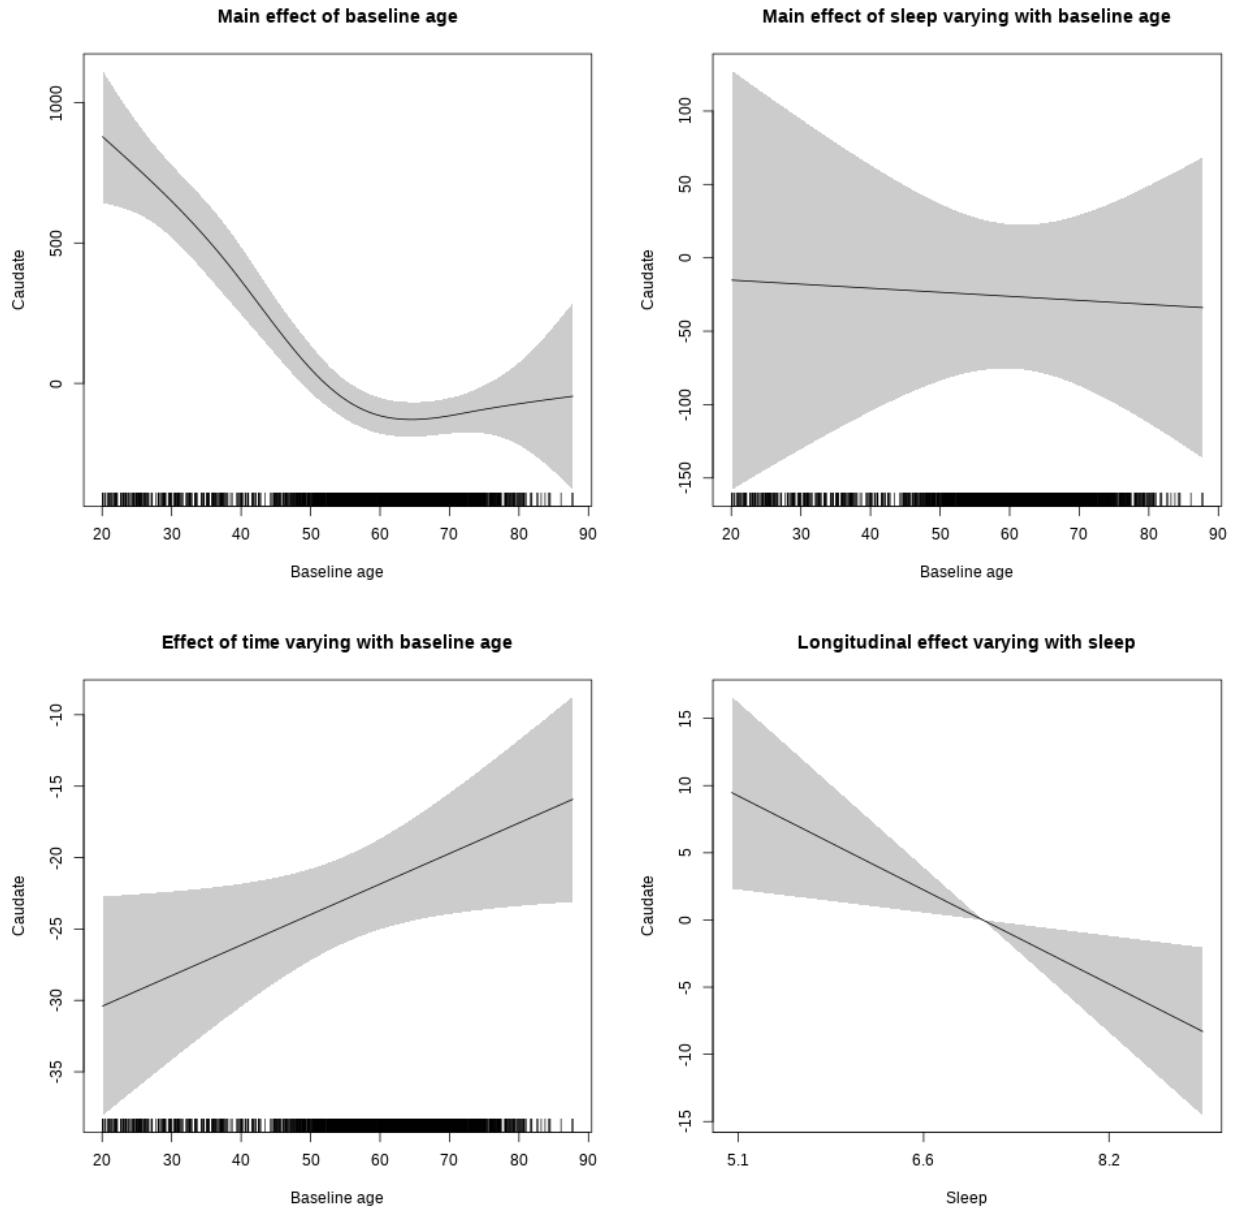

**Restricted to sleep  $\geq 5$  and  $\leq 9$  hours** Below is the row for `s(sleep_z):time` from the model output.

```
## s(sleep_z):time 1.000 1.000 7.031 0.00804 **
```

Below are plots of a plot of `s(bl_age)`, `s(bl_age):sleep_z`, `s(bl_age):time`, and `s(sleep_z):time`. For `s(sleep_z):time`, roughly, if we cannot fit a straight line through the confidence bands, there is evidence that the effect of time depends on sleep duration. It is correct that the confidence interval is zero at one point along the axis; this happens because we do not include the main effect.

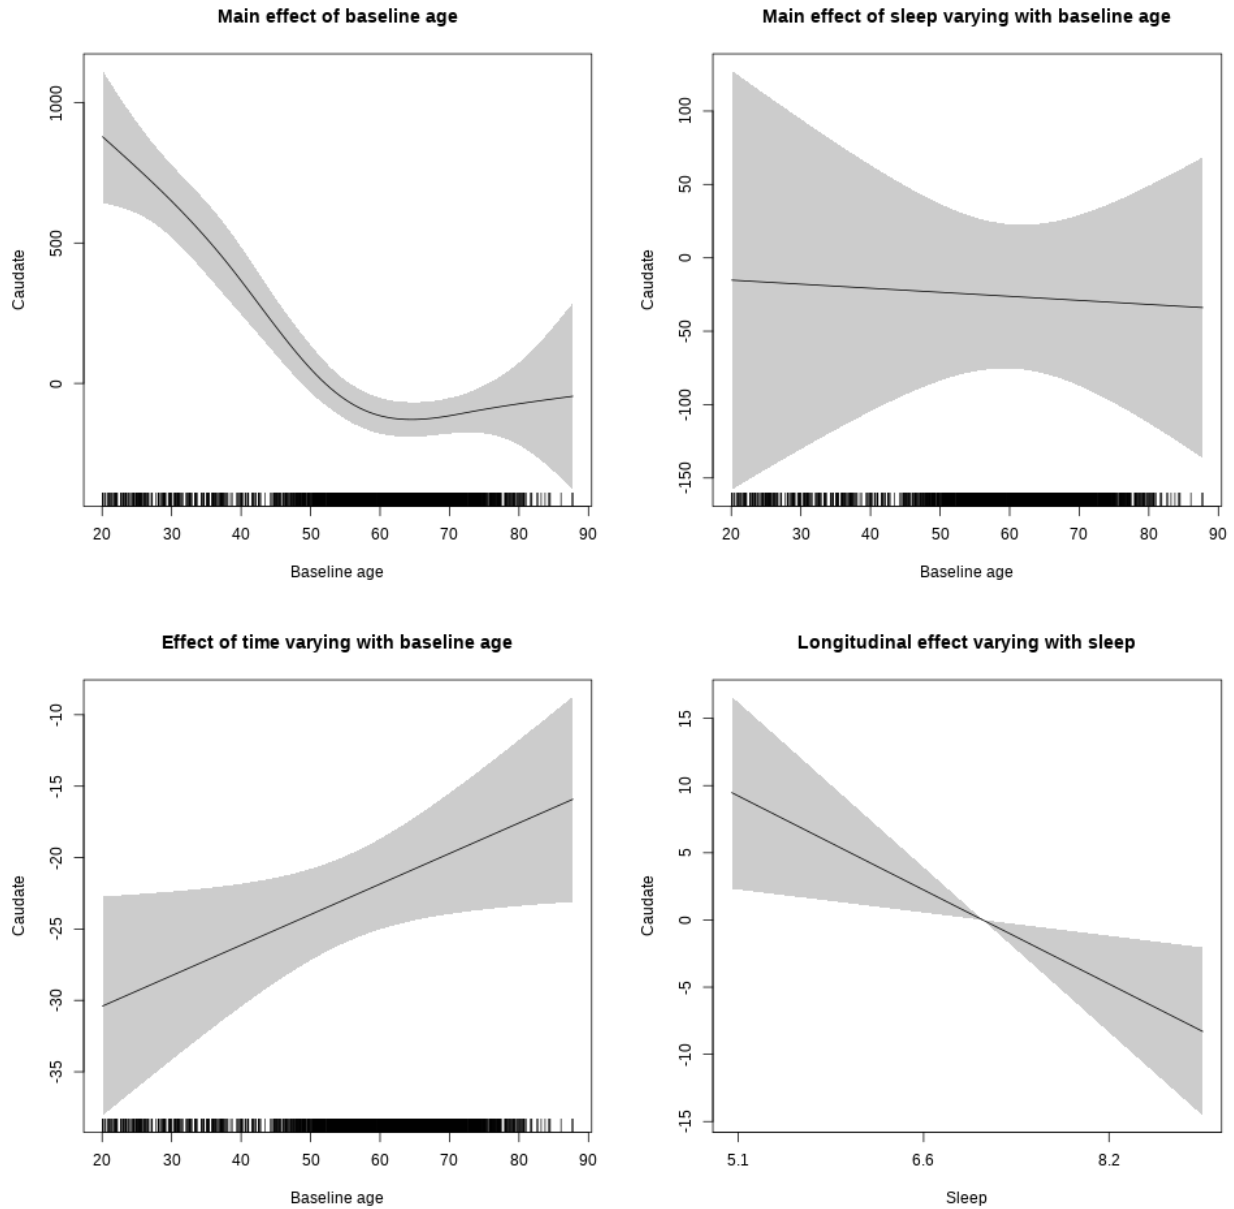

## CC\_Anterior

### Main analysis

**Full data** Below is the model output. The term `s(sleep_z):time` is probably what we care most about.

```
##
## Family: gaussian
## Link function: identity
##
## Formula:
## value ~ sex + site + icv + s(bl_age, k = 10, bs = "cr") + s(bl_age,
##   by = sleep_z, bs = "cr") + +s(bl_age, by = time, k = 5, bs = "cr") +
```

```

##      s(sleep_z, by = time, k = 5, bs = "cr", pc = 0)
## <environment: 0x563910f11468>
##
## Parametric coefficients:
##              Estimate Std. Error t value Pr(>|t|)
## (Intercept)  1041.729    10.716  97.211 < 2e-16 ***
## sexmale      -48.920     5.522  -8.859 < 2e-16 ***
## siteousAvanto -183.159    13.155 -13.923 < 2e-16 ***
## siteousPrisma -180.910    34.397  -5.259 1.48e-07 ***
## siteousSkyra  -149.870    12.792 -11.716 < 2e-16 ***
## siteUB       -154.162    24.824  -6.210 5.55e-10 ***
## siteUCAM     -164.357    13.384 -12.280 < 2e-16 ***
## siteUKB      -65.716    10.210  -6.437 1.29e-10 ***
## siteUmU      -113.667    15.405  -7.379 1.76e-13 ***
## icv          84.617     2.650  31.936 < 2e-16 ***
## ---
## Signif. codes:  0 '***' 0.001 '**' 0.01 '*' 0.05 '.' 0.1 ' ' 1
##
## Approximate significance of smooth terms:
##              edf Ref.df      F p-value
## s(bl_age)      3.514  3.514 40.379 < 2e-16 ***
## s(bl_age):sleep_z 2.000  2.000  1.567  0.209
## s(bl_age):time  2.514  2.514 12.844 6.1e-07 ***
## s(sleep_z):time  1.000  1.000  0.009  0.925
## ---
## Signif. codes:  0 '***' 0.001 '**' 0.01 '*' 0.05 '.' 0.1 ' ' 1
##
## R-sq.(adj) =  0.249
## lmer.REML = 96135 Scale est. = 1716.1    n = 8140

```

Below are plots of a plot of  $s(\text{bl\_age})$ ,  $s(\text{bl\_age}):\text{sleep\_z}$ ,  $s(\text{bl\_age}):\text{time}$ , and  $s(\text{sleep\_z}):\text{time}$ . For  $s(\text{sleep\_z}):\text{time}$ , roughly, if we cannot fit a straight line through the confidence bands, there is evidence that the effect of time depends on sleep duration. It is correct that the confidence interval is zero at one point along the axis; this happens because we do not include the main effect.

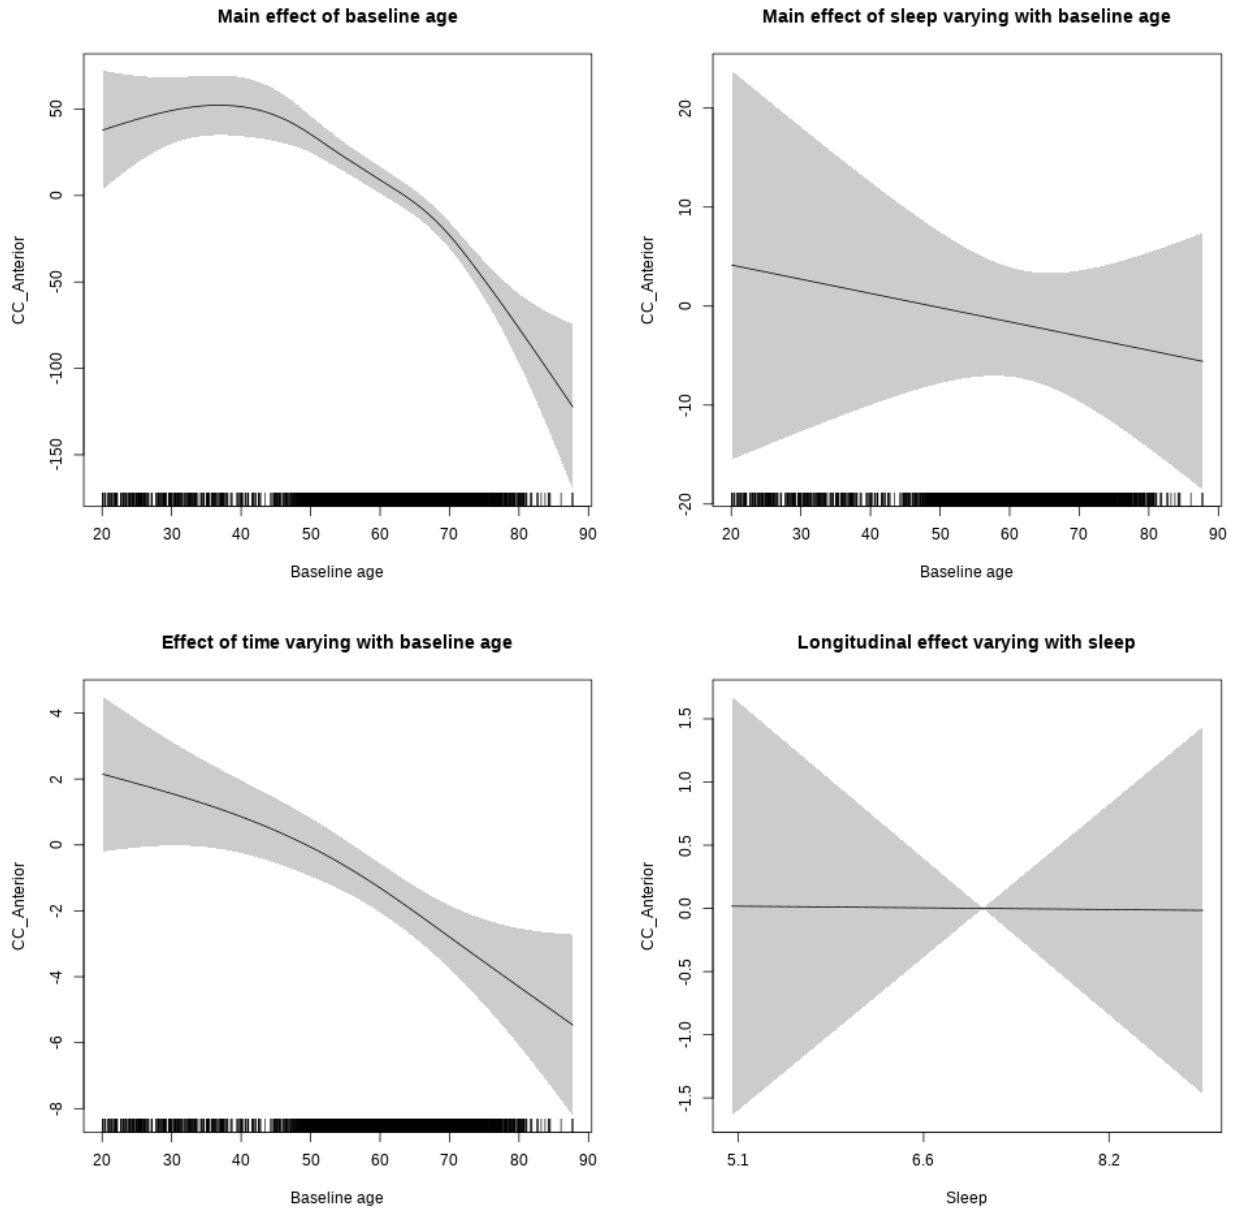

**Restricted to sleep  $\geq 5$  and  $\leq 9$  hours** Below is the row for `s(sleep_z):time` from the model output.

```
## s(sleep_z):time 1.000 1.000 0.000 0.983
```

Below are plots of a plot of `s(bl_age)`, `s(bl_age):sleep_z`, `s(bl_age):time`, and `s(sleep_z):time`. For `s(sleep_z):time`, roughly, if we cannot fit a straight line through the confidence bands, there is evidence that the effect of time depends on sleep duration. It is correct that the confidence interval is zero at one point along the axis; this happens because we do not include the main effect.



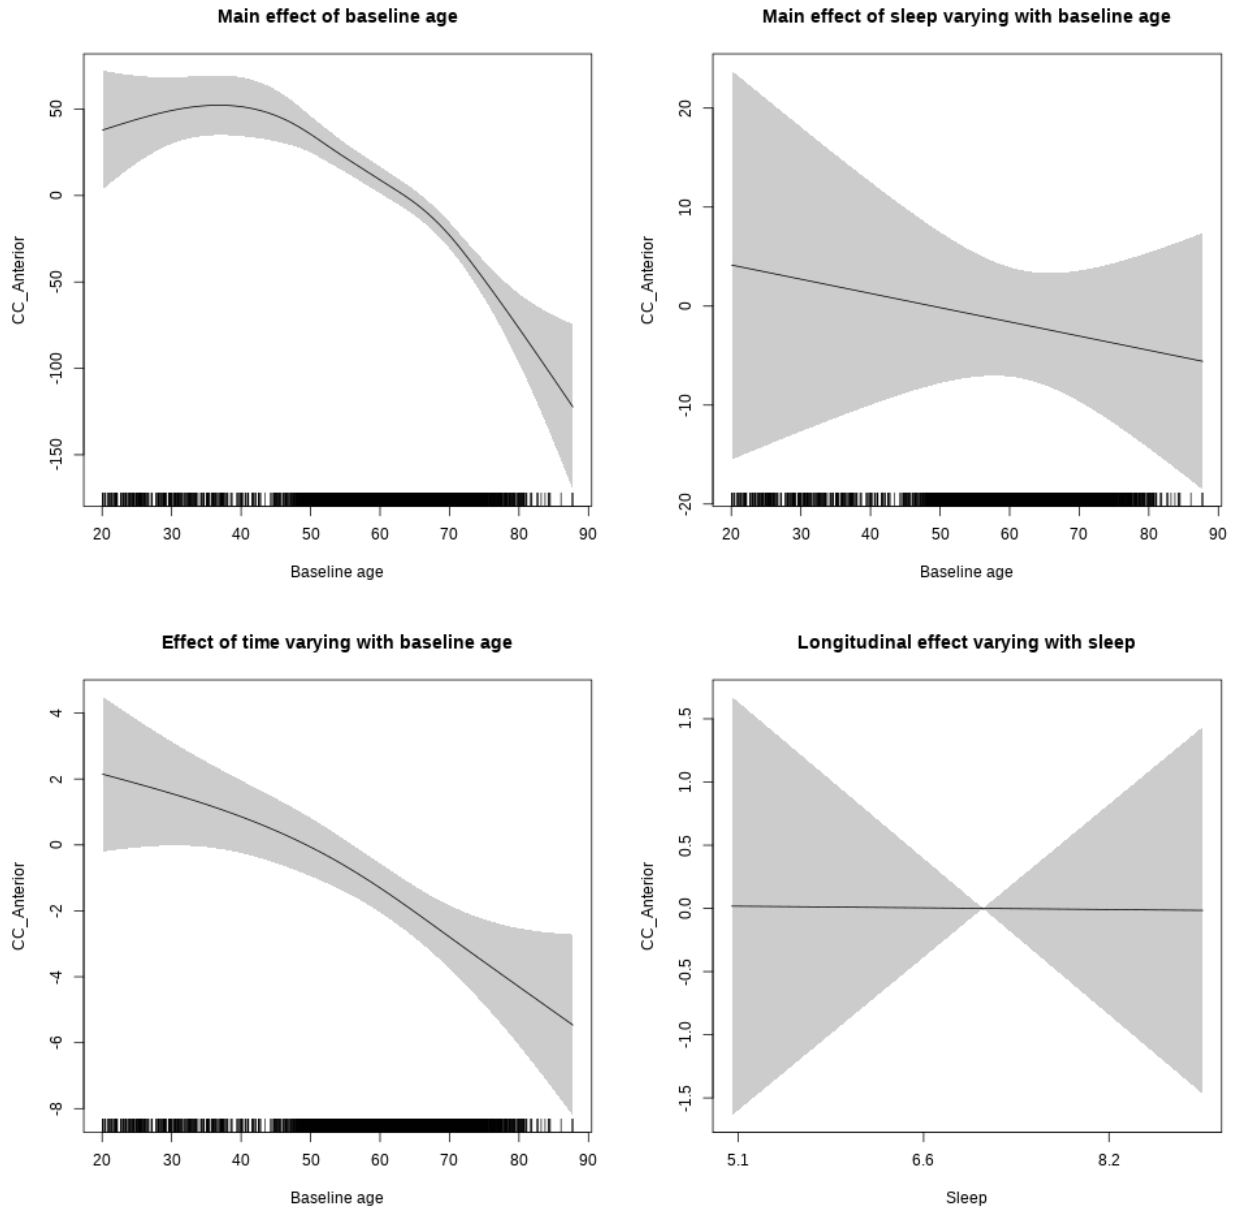

## Controlling for socioeconomic status

**Full data** Below is the model output. The term  $s(\text{sleep\_z}) : \text{time}$  is probably what we care most about.

```
##
## Family: gaussian
## Link function: identity
##
## Formula:
## value ~ sex + site + income_scaled + education_scaled + icv +
##       s(bl_age, k = 10, bs = "cr") + s(bl_age, by = sleep_z, bs = "cr") +
##       +s(bl_age, by = time, k = 5, bs = "cr") + s(sleep_z, by = time,
##       k = 5, bs = "cr", pc = 0)
```

```

## <environment: 0x563914d94f00>
##
## Parametric coefficients:
##           Estimate Std. Error t value Pr(>|t|)
## (Intercept)  1091.214    26.127  41.765 < 2e-16 ***
## sexmale      -68.151     7.214  -9.447 < 2e-16 ***
## siteousAvanto -229.025    28.838  -7.942 2.49e-15 ***
## siteousPrisma -227.859    62.088  -3.670 0.000245 ***
## siteousSkyra  -177.742    26.733  -6.649 3.30e-11 ***
## siteUKB      -111.670    24.679  -4.525 6.19e-06 ***
## income_scaled -10.445     9.162  -1.140 0.254322
## education_scaled  6.501    10.243   0.635 0.525636
## icv          100.231     3.581  27.992 < 2e-16 ***
## ---
## Signif. codes:  0 '***' 0.001 '**' 0.01 '*' 0.05 '.' 0.1 ' ' 1
##
## Approximate significance of smooth terms:
##           edf Ref.df   F  p-value
## s(bl_age)      2.289  2.289 12.581 1.56e-06 ***
## s(bl_age):sleep_z 2.000  2.000  1.406  0.24513
## s(bl_age):time  3.144  3.144  4.588  0.00515 **
## s(sleep_z):time  1.000  1.000  0.445  0.50494
## ---
## Signif. codes:  0 '***' 0.001 '**' 0.01 '*' 0.05 '.' 0.1 ' ' 1
##
## R-sq.(adj) =  0.244
## lmer.REML = 55412  Scale est. = 2091.1    n = 4640

```

Below are plots of a plot of  $s(\text{bl\_age})$ ,  $s(\text{bl\_age}):\text{sleep\_z}$ ,  $s(\text{bl\_age}):\text{time}$ , and  $s(\text{sleep\_z}):\text{time}$ . For  $s(\text{sleep\_z}):\text{time}$ , roughly, if we cannot fit a straight line through the confidence bands, there is evidence that the effect of time depends on sleep duration. It is correct that the confidence interval is zero at one point along the axis; this happens because we do not include the main effect.

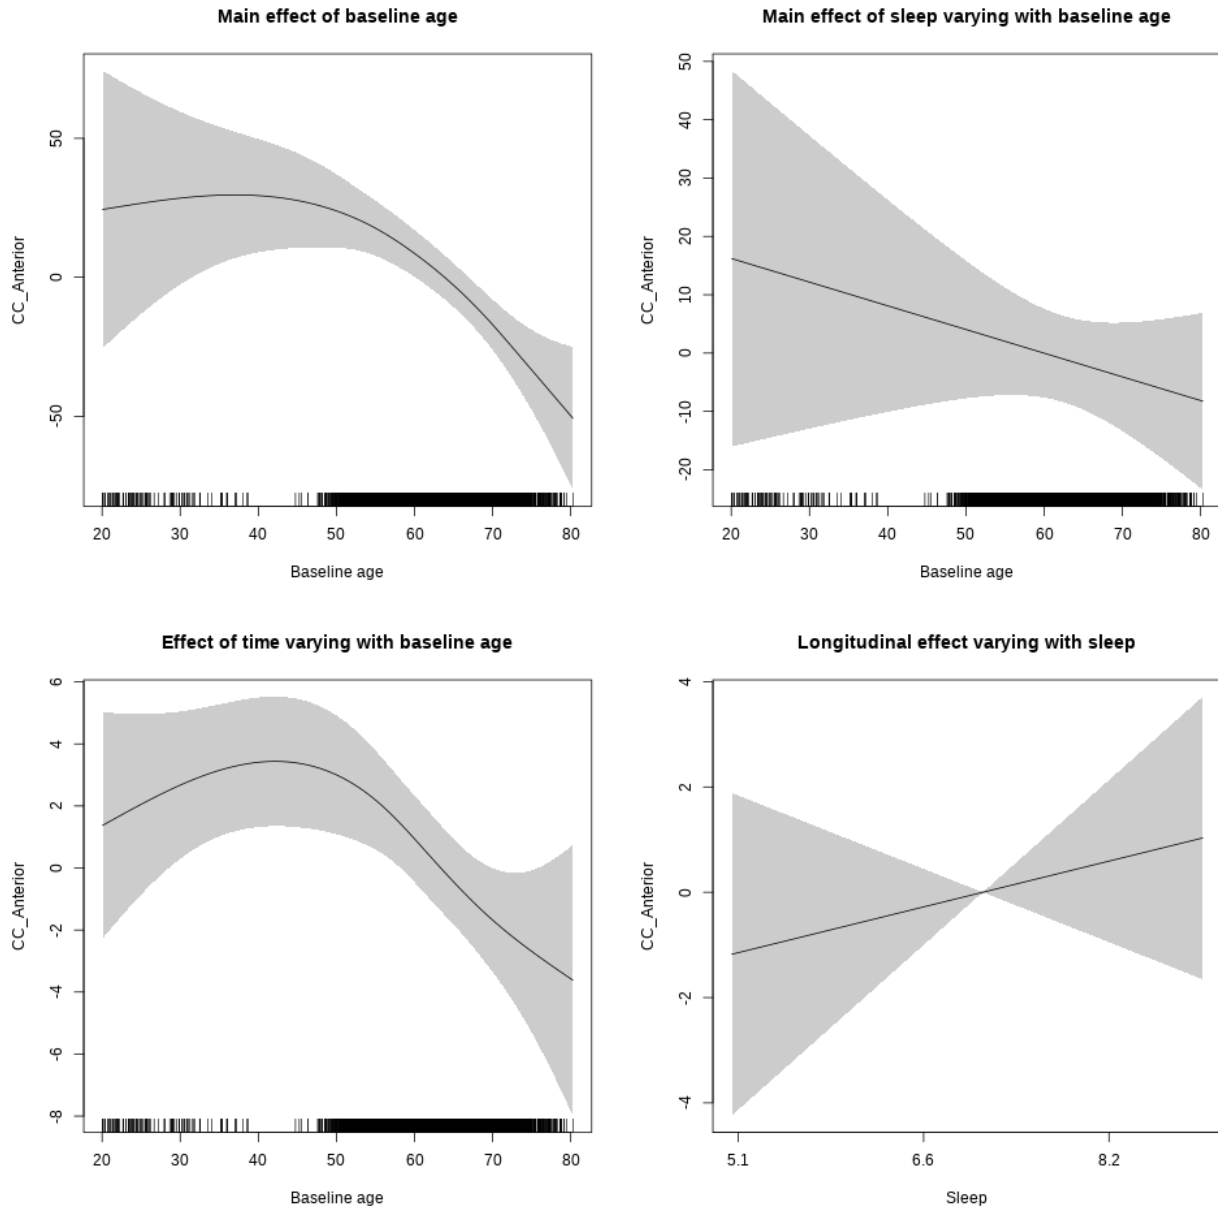

**Restricted to sleep  $\geq 5$  and  $\leq 9$  hours** Below is the row for `s(sleep_z):time` from the model output.

```
## s(sleep_z):time 1.000 1.000 0.591 0.4422
```

Below are plots of a plot of `s(bl_age)`, `s(bl_age):sleep_z`, `s(bl_age):time`, and `s(sleep_z):time`. For `s(sleep_z):time`, roughly, if we cannot fit a straight line through the confidence bands, there is evidence that the effect of time depends on sleep duration. It is correct that the confidence interval is zero at one point along the axis; this happens because we do not include the main effect.



## Controlling for BMI

**Full data** Below is the model output. The term `s(sleep_z):time` is probably what we care most about.

```
##
## Family: gaussian
## Link function: identity
##
## Formula:
## value ~ sex + site + bmi + icv + s(bl_age, k = 10, bs = "cr") +
##   s(bl_age, by = sleep_z, bs = "cr") + s(bl_age, by = time,
##   k = 5, bs = "cr") + s(sleep_z, by = time, k = 5, bs = "cr",
##   pc = 0)
```

```

## <environment: 0x5639110b8150>
##
## Parametric coefficients:
##           Estimate Std. Error t value Pr(>|t|)
## (Intercept)  913.0309    23.5848  38.713 < 2e-16 ***
## sexmale      -55.3715     6.6246  -8.358 < 2e-16 ***
## siteousPrisma -0.2780    35.7937  -0.008 0.993804
## siteousSkyra  41.9660    11.3363   3.702 0.000216 ***
## siteUCAM      17.1302    17.9869   0.952 0.340951
## siteUKB       108.5606    16.8330   6.449 1.22e-10 ***
## siteUmU       71.4450    20.6060   3.467 0.000530 ***
## bmi          -1.7878     0.6862  -2.606 0.009198 **
## icv           93.2012     3.2743  28.465 < 2e-16 ***
## ---
## Signif. codes:  0 '***' 0.001 '**' 0.01 '*' 0.05 '.' 0.1 ' ' 1
##
## Approximate significance of smooth terms:
##           edf Ref.df    F p-value
## s(bl_age)      2.799  2.799 20.977 < 2e-16 ***
## s(bl_age):sleep_z 2.000  2.000  0.418 0.65817
## s(bl_age):time  2.888  2.888  4.984 0.00127 **
## s(sleep_z):time  1.000  1.000  0.155 0.69341
## ---
## Signif. codes:  0 '***' 0.001 '**' 0.01 '*' 0.05 '.' 0.1 ' ' 1
##
## R-sq.(adj) =  0.249
## lmer.REML =  64354  Scale est. = 1968.3    n = 5402

```

Below are plots of a plot of  $s(\text{bl\_age})$ ,  $s(\text{bl\_age}):\text{sleep\_z}$ ,  $s(\text{bl\_age}):\text{time}$ , and  $s(\text{sleep\_z}):\text{time}$ . For  $s(\text{sleep\_z}):\text{time}$ , roughly, if we cannot fit a straight line through the confidence bands, there is evidence that the effect of time depends on sleep duration. It is correct that the confidence interval is zero at one point along the axis; this happens because we do not include the main effect.

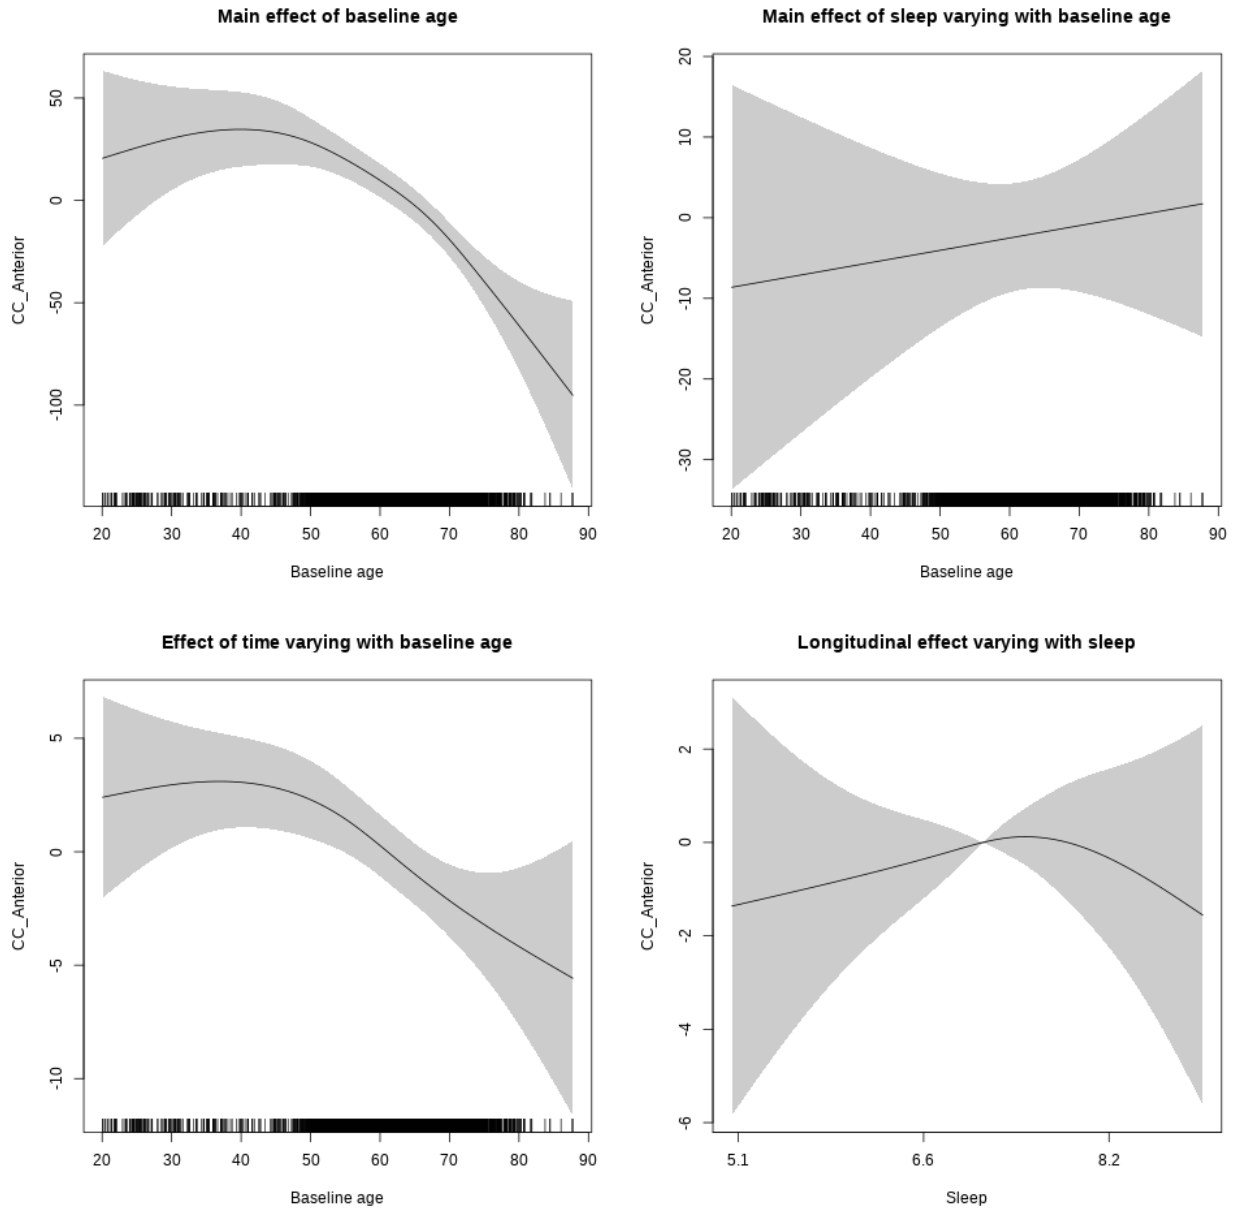

**Restricted to sleep  $\geq 5$  and  $\leq 9$  hours** Below is the row for `s(sleep_z):time` from the model output.

```
## s(sleep_z):time  1.725  1.725  0.447  0.67040
```

Below are plots of a plot of `s(bl_age)`, `s(bl_age):sleep_z`, `s(bl_age):time`, and `s(sleep_z):time`. For `s(sleep_z):time`, roughly, if we cannot fit a straight line through the confidence bands, there is evidence that the effect of time depends on sleep duration. It is correct that the confidence interval is zero at one point along the axis; this happens because we do not include the main effect.

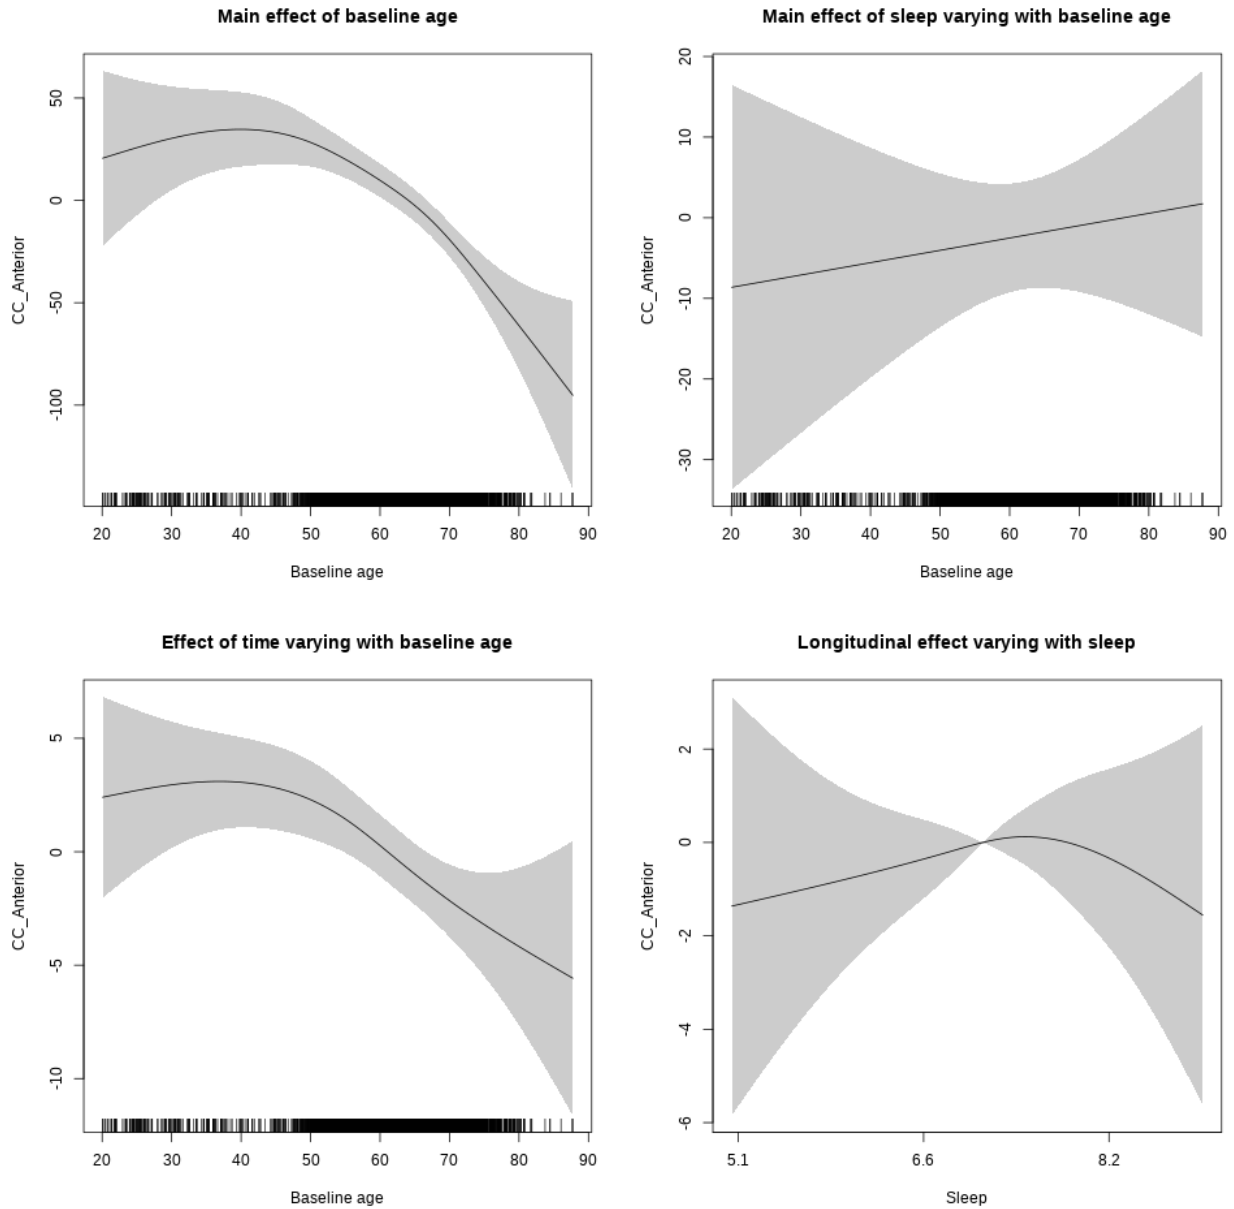

## Controlling for depression

**Full data** Below is the model output. The term  $s(\text{sleep\_z}) : \text{time}$  is probably what we care most about.

```
##
## Family: gaussian
## Link function: identity
##
## Formula:
## value ~ sex + site + depression + icv + s(bl_age, k = 10, bs = "cr") +
##   s(bl_age, by = sleep_z, bs = "cr") + +s(bl_age, by = time,
##   k = 5, bs = "cr") + s(sleep_z, by = time, k = 5, bs = "cr",
##   pc = 0)
```

```

## <environment: 0x563914f44da8>
##
## Parametric coefficients:
##           Estimate Std. Error t value Pr(>|t|)
## (Intercept)  1029.829    12.580  81.860 < 2e-16 ***
## sexmale      -54.666     6.583  -8.304 < 2e-16 ***
## siteousAvanto -156.425    27.039  -5.785 7.63e-09 ***
## siteousPrisma -152.857    48.347  -3.162 0.00158 **
## siteousSkyra  -114.034    22.887  -4.983 6.46e-07 ***
## siteUCAM      -142.953    15.074  -9.484 < 2e-16 ***
## siteUKB       -55.391    11.553  -4.794 1.67e-06 ***
## siteUmU       -86.171    18.440  -4.673 3.04e-06 ***
## depression    -17.759    23.106  -0.769 0.44218
## icv           87.739     3.179  27.597 < 2e-16 ***
## ---
## Signif. codes:  0 '***' 0.001 '**' 0.01 '*' 0.05 '.' 0.1 ' ' 1
##
## Approximate significance of smooth terms:
##           edf Ref.df      F p-value
## s(bl_age)      2.987  2.987 20.000 < 2e-16 ***
## s(bl_age):sleep_z 2.000  2.000  1.760 0.17209
## s(bl_age):time  2.655  2.655  4.266 0.00414 **
## s(sleep_z):time  1.000  1.000  0.045 0.83189
## ---
## Signif. codes:  0 '***' 0.001 '**' 0.01 '*' 0.05 '.' 0.1 ' ' 1
##
## R-sq.(adj) =  0.242
## lmer.REML = 67610 Scale est. = 1925.6    n = 5669

```

Below are plots of a plot of `s(bl_age)`, `s(bl_age):sleep_z`, `s(bl_age):time`, and `s(sleep_z):time`. For `s(sleep_z):time`, roughly, if we cannot fit a straight line through the confidence bands, there is evidence that the effect of time depends on sleep duration. It is correct that the confidence interval is zero at one point along the axis; this happens because we do not include the main effect.



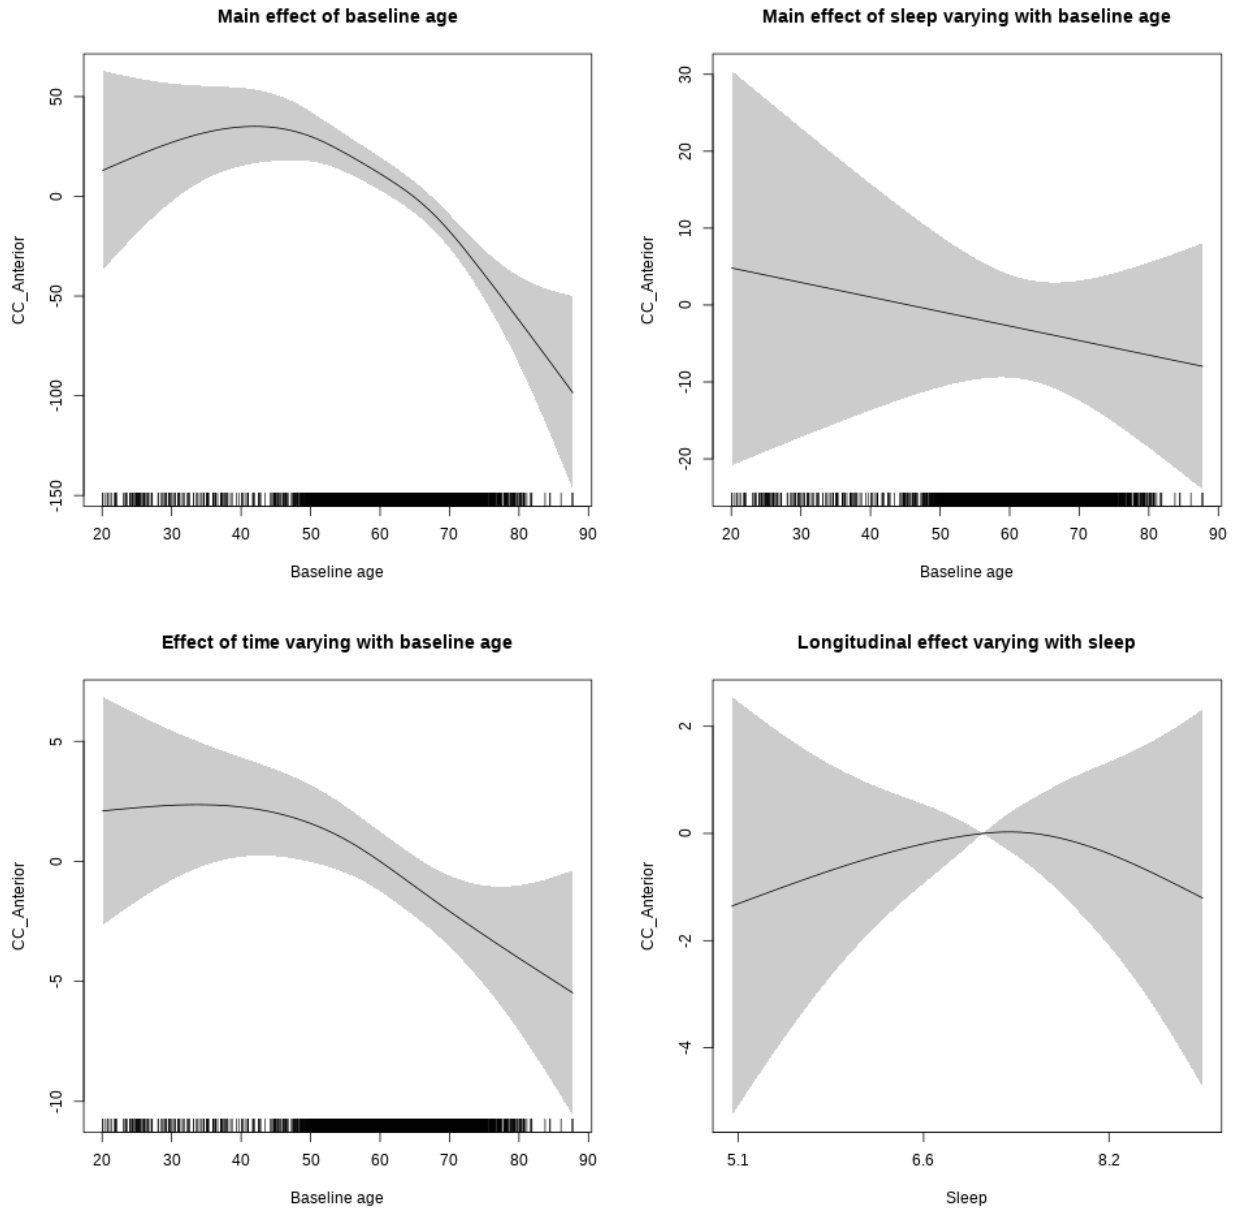

**Restricted to sleep  $\geq 5$  and  $\leq 9$  hours** Below is the row for  $s(\text{sleep\_z})\text{:time}$  from the model output.

```
## s(sleep_z):time 1.534 1.534 0.374 0.6866
```

Below are plots of a plot of  $s(\text{bl\_age})$ ,  $s(\text{bl\_age})\text{:sleep\_z}$ ,  $s(\text{bl\_age})\text{:time}$ , and  $s(\text{sleep\_z})\text{:time}$ . For  $s(\text{sleep\_z})\text{:time}$ , roughly, if we cannot fit a straight line through the confidence bands, there is evidence that the effect of time depends on sleep duration. It is correct that the confidence interval is zero at one point along the axis; this happens because we do not include the main effect.

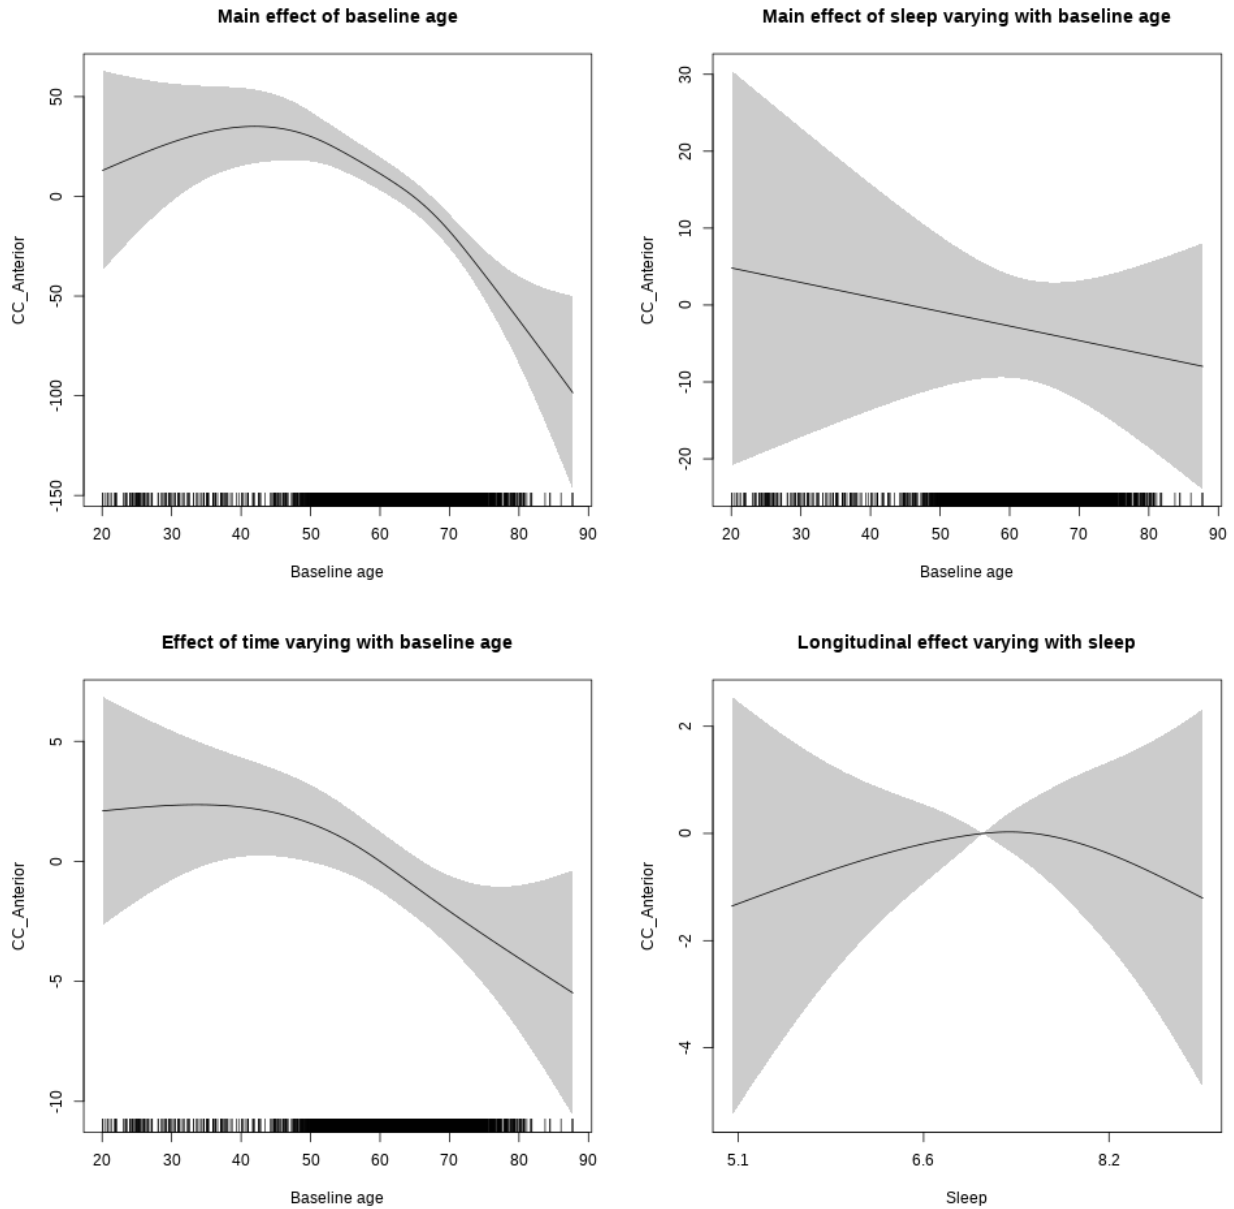

## Controlling for sleep quality

**Full data** Below is the model output. The term  $s(\text{sleep\_z}) : \text{time}$  is probably what we care most about.

```
##
## Family: gaussian
## Link function: identity
##
## Formula:
## value ~ X + s(bl_age, k = 10, bs = "cr") + s(bl_age, by = sleep_z,
##       bs = "cr") + s(bl_age, by = time, k = 5, bs = "cr") + s(sleep_z,
##       by = time, k = 5, bs = "cr", pc = 0)
## <environment: 0x563910056020>
```

```

##
## Parametric coefficients:
##               Estimate Std. Error t value Pr(>|t|)
## (Intercept)      859.0983    19.2650  44.594 < 2e-16 ***
## Xsexmale          49.2199     7.2099   6.827 9.92e-12 ***
## XsiteousAvanto    0.8138    18.4176  0.044 0.9648
## XsiteousPrisma    51.8573    34.7785  1.491 0.1360
## XsiteousSkyra     7.7569    18.4791  0.420 0.6747
## XsiteUB           -31.3840    29.2477 -1.073 0.2833
## XsiteUCAM         -8.1021    18.8804 -0.429 0.6679
## XsiteUKB          -97.4471    58.8306 -1.656 0.0977 .
## XsiteUmU          -7.3338    20.9808 -0.350 0.7267
## Xukb_dummy:sleep_accel  8.5035     4.5310  1.877 0.0606 .
## Xukb_dummy:chronotype  6.5705     6.0671  1.083 0.2789
## Xukb_dummy:dozing    9.5405    12.4861  0.764 0.4449
## Xukb_dummy:sleeplessness 6.0568     7.7865  0.778 0.4367
## Xukb_dummy:snoring   11.7254    11.0357  1.062 0.2881
## Xukb_dummy:gettingup 20.8107     8.4829  2.453 0.0142 *
## Xnotukb_dummy:PSQI_Global -0.7046     2.3844 -0.295 0.7676
## ---
## Signif. codes:  0 '***' 0.001 '**' 0.01 '*' 0.05 '.' 0.1 ' ' 1
##
## Approximate significance of smooth terms:
##               edf Ref.df      F p-value
## s(bl_age)      3.452  3.452 31.110 <2e-16 ***
## s(bl_age):sleep_z 2.000  2.000  0.205  0.814
## s(bl_age):time  2.000  2.000 37.724 <2e-16 ***
## s(sleep_z):time 1.000  1.000  0.001  0.980
## ---
## Signif. codes:  0 '***' 0.001 '**' 0.01 '*' 0.05 '.' 0.1 ' ' 1
##
## R-sq.(adj) = 0.131
## lmer.REML = 50229 Scale est. = 1486.4    n = 4280

```

Below are plots of a plot of  $s(\text{bl\_age})$ ,  $s(\text{bl\_age}):\text{sleep\_z}$ ,  $s(\text{bl\_age}):\text{time}$ , and  $s(\text{sleep\_z}):\text{time}$ . For  $s(\text{sleep\_z}):\text{time}$ , roughly, if we cannot fit a straight line through the confidence bands, there is evidence that the effect of time depends on sleep duration. It is correct that the confidence interval is zero at one point along the axis; this happens because we do not include the main effect.

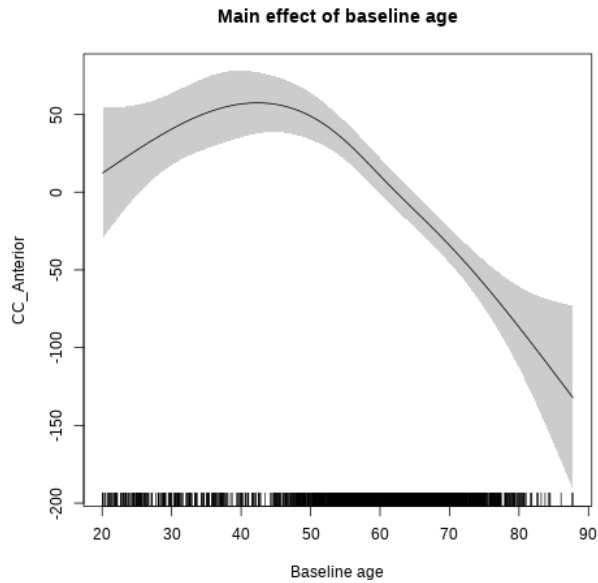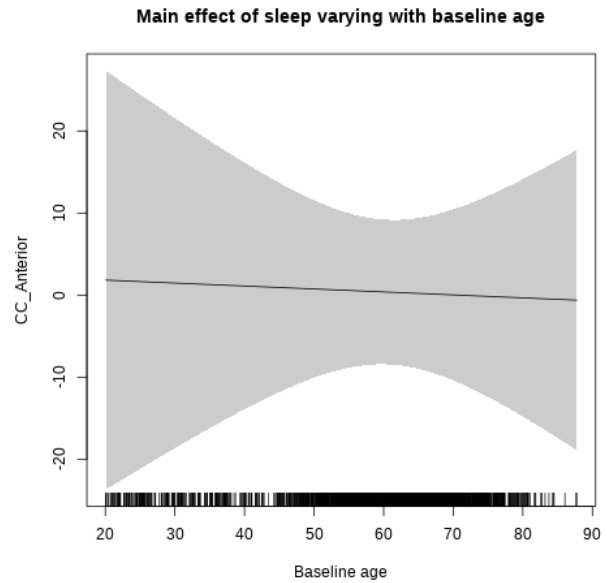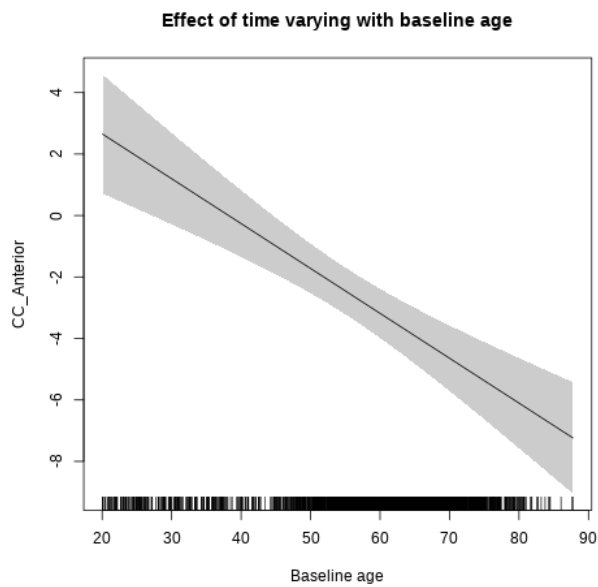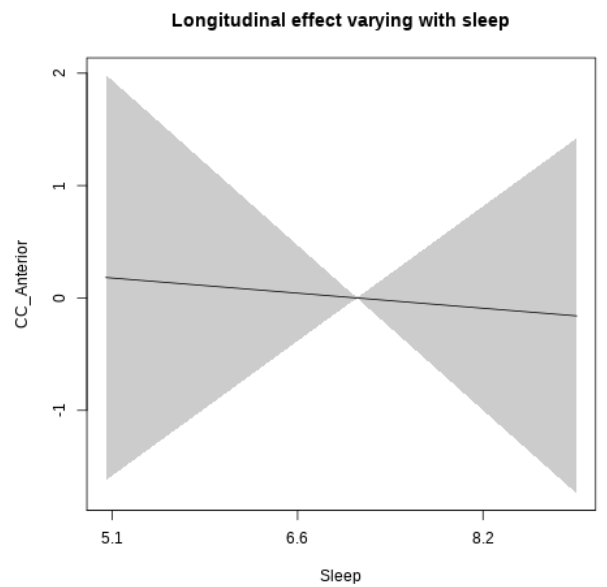

**Restricted to sleep  $\geq 5$  and  $\leq 9$  hours** Below is the row for `s(sleep_z):time` from the model output.

```
## s(sleep_z):time 1.000 1.000 0.041 0.840
```

Below are plots of a plot of `s(bl_age)`, `s(bl_age):sleep_z`, `s(bl_age):time`, and `s(sleep_z):time`. For `s(sleep_z):time`, roughly, if we cannot fit a straight line through the confidence bands, there is evidence that the effect of time depends on sleep duration. It is correct that the confidence interval is zero at one point along the axis; this happens because we do not include the main effect.



## CC\_Central

### Main analysis

**Full data** Below is the model output. The term `s(sleep_z):time` is probably what we care most about.

```
##
## Family: gaussian
## Link function: identity
##
## Formula:
## value ~ sex + site + icv + s(bl_age, k = 10, bs = "cr") + s(bl_age,
##   by = sleep_z, bs = "cr") + +s(bl_age, by = time, k = 5, bs = "cr") +
```

```

##      s(sleep_z, by = time, k = 5, bs = "cr", pc = 0)
## <environment: 0x56391119f7e0>
##
## Parametric coefficients:
##           Estimate Std. Error t value Pr(>|t|)
## (Intercept)   536.885      8.292  64.750 < 2e-16 ***
## sexmale       -20.795      4.275  -4.864 1.17e-06 ***
## siteousAvanto -80.679     10.191  -7.917 2.76e-15 ***
## siteousPrisma -50.566     28.378  -1.782 0.07480 .
## siteousSkyra  -86.897      9.907  -8.771 < 2e-16 ***
## siteUB        -50.600     19.156  -2.642 0.00827 **
## siteUCAM      -26.178     10.351  -2.529 0.01146 *
## siteUKB        8.208      7.893   1.040 0.29839
## siteUmU       -8.750     11.900  -0.735 0.46218
## icv           22.677      2.061  11.002 < 2e-16 ***
## ---
## Signif. codes:  0 '***' 0.001 '**' 0.01 '*' 0.05 '.' 0.1 ' ' 1
##
## Approximate significance of smooth terms:
##           edf Ref.df      F p-value
## s(bl_age)      3.481  3.481 142.841 <2e-16 ***
## s(bl_age):sleep_z 3.294  3.294   3.069 0.0452 *
## s(bl_age):time  3.125  3.125  65.424 <2e-16 ***
## s(sleep_z):time  1.000  1.000   0.405 0.5245
## ---
## Signif. codes:  0 '***' 0.001 '**' 0.01 '*' 0.05 '.' 0.1 ' ' 1
##
## R-sq.(adj) =  0.171
## lmer.REML = 92655  Scale est. = 1200.4    n = 8144

```

Below are plots of a plot of  $s(\text{bl\_age})$ ,  $s(\text{bl\_age}):\text{sleep\_z}$ ,  $s(\text{bl\_age}):\text{time}$ , and  $s(\text{sleep\_z}):\text{time}$ . For  $s(\text{sleep\_z}):\text{time}$ , roughly, if we cannot fit a straight line through the confidence bands, there is evidence that the effect of time depends on sleep duration. It is correct that the confidence interval is zero at one point along the axis; this happens because we do not include the main effect.

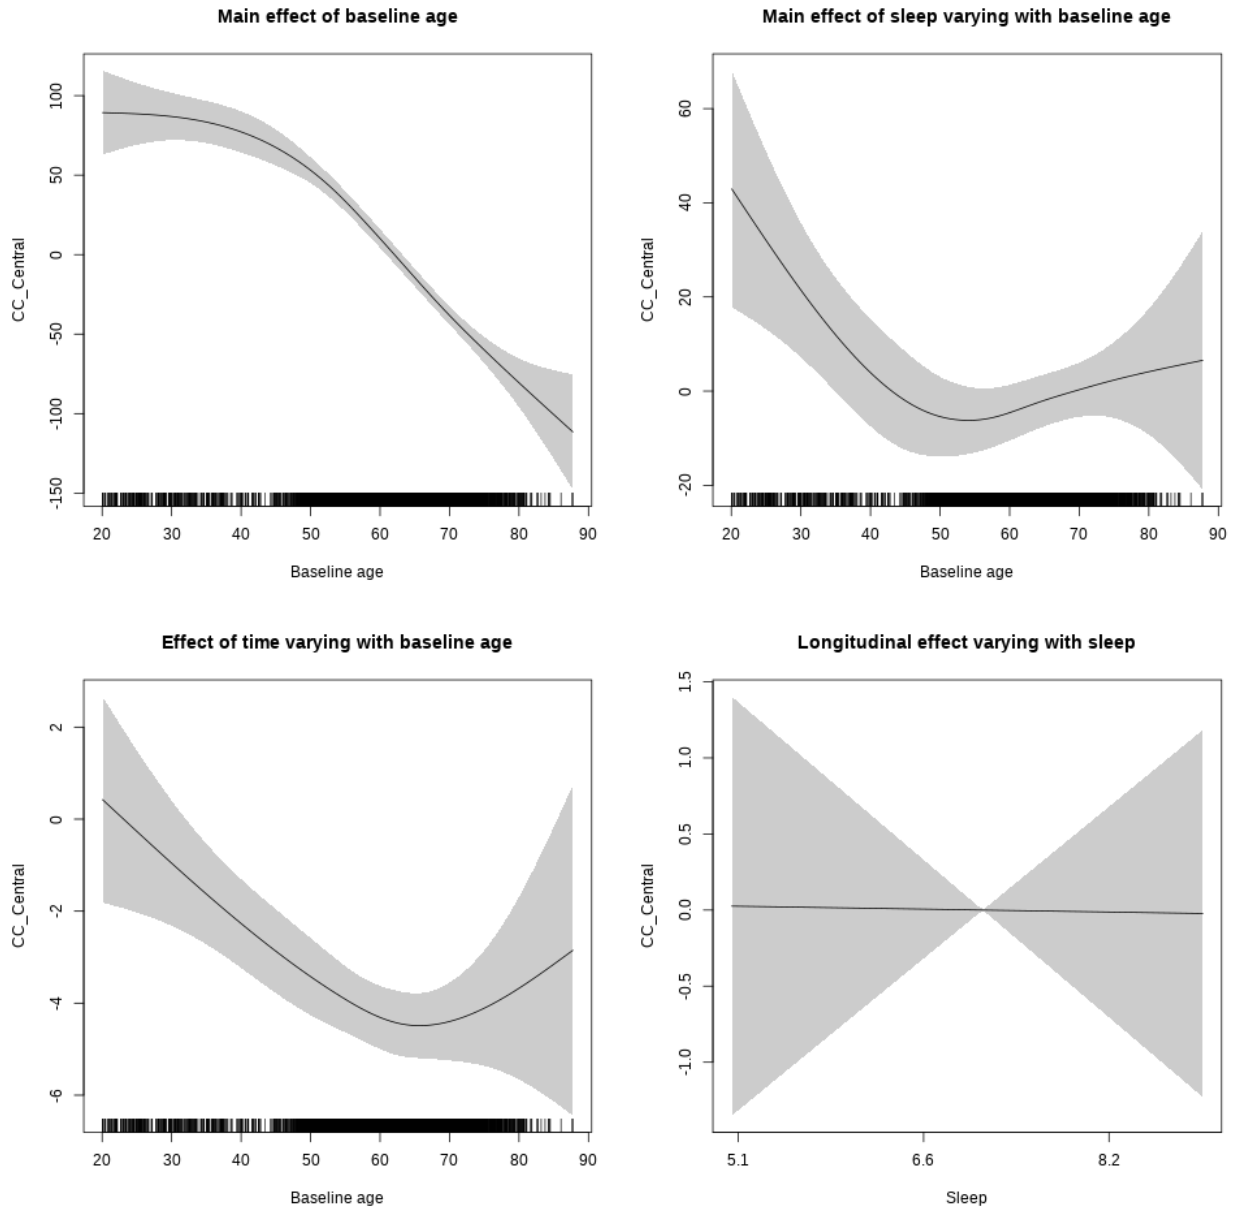

**Restricted to sleep  $\geq 5$  and  $\leq 9$  hours** Below is the row for `s(sleep_z):time` from the model output.

```
## s(sleep_z):time 1.000 1.000 0.001 0.97009
```

Below are plots of a plot of `s(bl_age)`, `s(bl_age):sleep_z`, `s(bl_age):time`, and `s(sleep_z):time`. For `s(sleep_z):time`, roughly, if we cannot fit a straight line through the confidence bands, there is evidence that the effect of time depends on sleep duration. It is correct that the confidence interval is zero at one point along the axis; this happens because we do not include the main effect.



### Controlling for socioeconomic status

**Full data** Below is the model output. The term `s(sleep_z):time` is probably what we care most about.

```
##
## Family: gaussian
## Link function: identity
##
## Formula:
## value ~ sex + site + income_scaled + education_scaled + icv +
##       s(bl_age, k = 10, bs = "cr") + s(bl_age, by = sleep_z, bs = "cr") +
##       +s(bl_age, by = time, k = 5, bs = "cr") + s(sleep_z, by = time,
##       k = 5, bs = "cr", pc = 0)
```



```

## <environment: 0x563914d942f8>
##
## Parametric coefficients:
##           Estimate Std. Error t value Pr(>|t|)
## (Intercept)   543.530    20.660  26.308 < 2e-16 ***
## sexmale       -24.010     5.684  -4.224 2.45e-05 ***
## siteousAvanto -86.377    22.865  -3.778 0.00016 ***
## siteousPrisma  2.220    50.546   0.044 0.96497
## siteousSkyra  -85.065    21.092  -4.033 5.60e-05 ***
## siteUKB        17.325    19.538   0.887 0.37526
## income_scaled  -3.531     7.270  -0.486 0.62718
## education_scaled -18.296    8.040  -2.276 0.02291 *
## icv            28.530     2.826  10.095 < 2e-16 ***
## ---
## Signif. codes:  0 '***' 0.001 '**' 0.01 '*' 0.05 '.' 0.1 ' ' 1
##
## Approximate significance of smooth terms:
##           edf Ref.df    F p-value
## s(bl_age)      3.208  3.208 73.587 <2e-16 ***
## s(bl_age):sleep_z 2.000  2.000  0.263  0.769
## s(bl_age):time  2.882  2.882 35.084 <2e-16 ***
## s(sleep_z):time  1.000  1.000  0.024  0.878
## ---
## Signif. codes:  0 '***' 0.001 '**' 0.01 '*' 0.05 '.' 0.1 ' ' 1
##
## R-sq.(adj) =  0.145
## lmer.REML = 53457  Scale est. = 1410.7    n = 4646

```

Below are plots of a plot of  $s(\text{bl\_age})$ ,  $s(\text{bl\_age}):\text{sleep\_z}$ ,  $s(\text{bl\_age}):\text{time}$ , and  $s(\text{sleep\_z}):\text{time}$ . For  $s(\text{sleep\_z}):\text{time}$ , roughly, if we cannot fit a straight line through the confidence bands, there is evidence that the effect of time depends on sleep duration. It is correct that the confidence interval is zero at one point along the axis; this happens because we do not include the main effect.

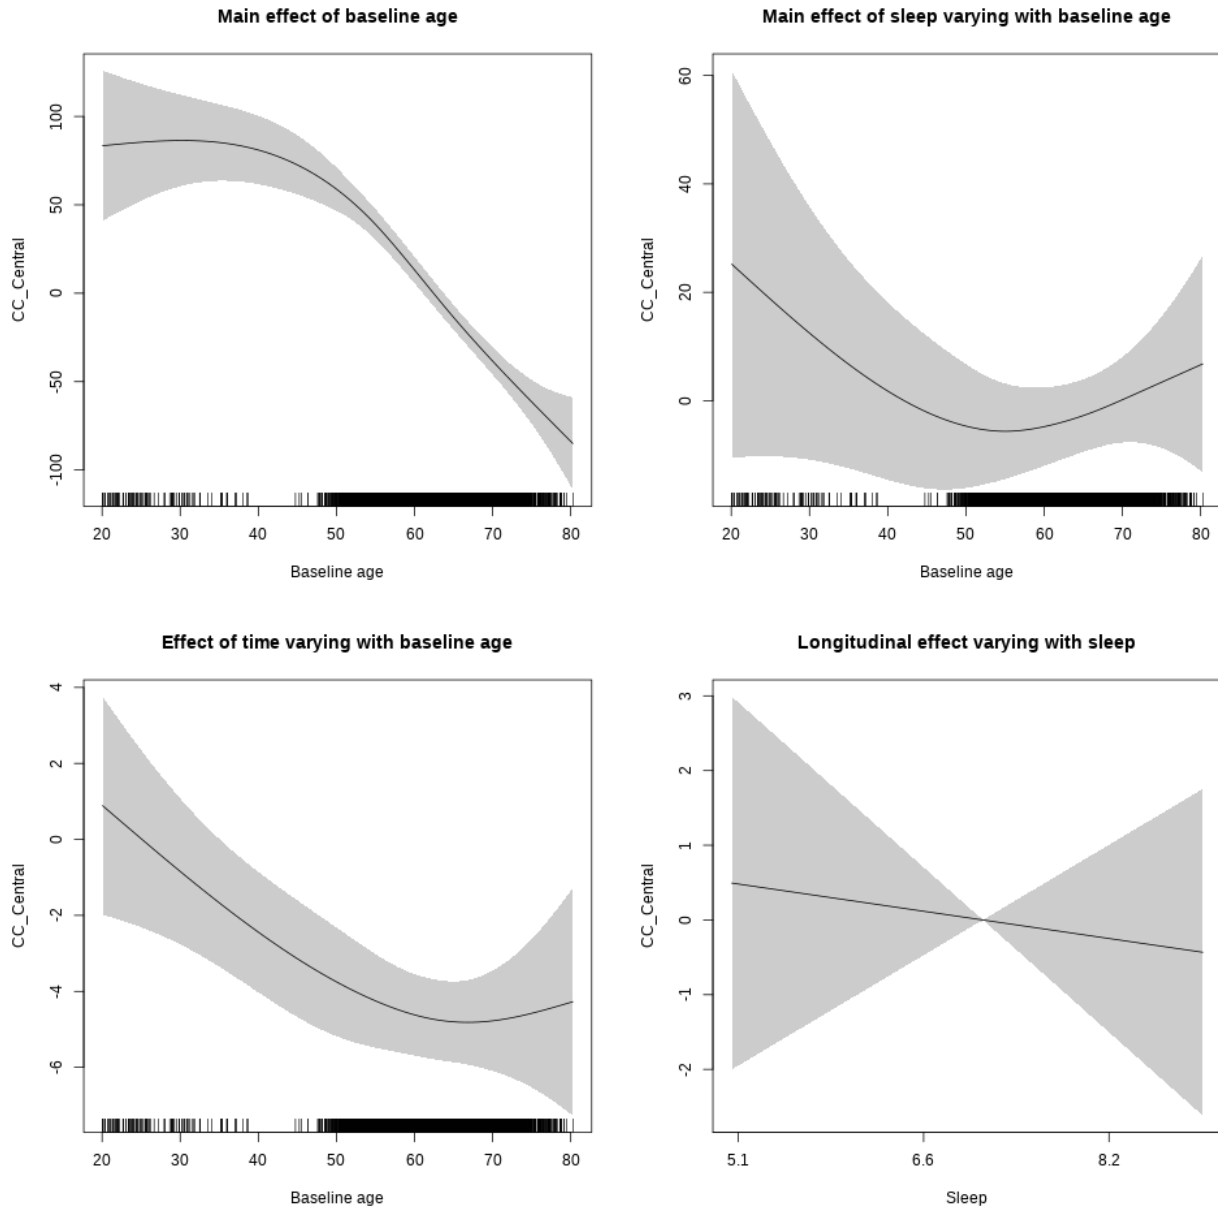

**Restricted to sleep  $\geq 5$  and  $\leq 9$  hours** Below is the row for `s(sleep_z):time` from the model output.

```
## s(sleep_z):time  1.000  1.000  0.157  0.692
```

Below are plots of a plot of `s(bl_age)`, `s(bl_age):sleep_z`, `s(bl_age):time`, and `s(sleep_z):time`. For `s(sleep_z):time`, roughly, if we cannot fit a straight line through the confidence bands, there is evidence that the effect of time depends on sleep duration. It is correct that the confidence interval is zero at one point along the axis; this happens because we do not include the main effect.



## Controlling for BMI

**Full data** Below is the model output. The term `s(sleep_z):time` is probably what we care most about.

```
##
## Family: gaussian
## Link function: identity
##
## Formula:
## value ~ sex + site + bmi + icv + s(bl_age, k = 10, bs = "cr") +
##   s(bl_age, by = sleep_z, bs = "cr") + +s(bl_age, by = time,
##   k = 5, bs = "cr") + s(sleep_z, by = time, k = 5, bs = "cr",
##   pc = 0)
```

```

## <environment: 0x563910f9aa40>
##
## Parametric coefficients:
##           Estimate Std. Error t value Pr(>|t|)
## (Intercept)  464.8117   18.8440  24.666 < 2e-16 ***
## sexmale      -19.0298    5.2496  -3.625 0.000292 ***
## siteousPrisma 36.8842   29.5311   1.249 0.211720
## siteousSkyra  4.5738    9.3437   0.490 0.624504
## siteUCAM     64.0764   14.5031   4.418 1.02e-05 ***
## siteUKB     96.9971   13.5902   7.137 1.08e-12 ***
## siteUmU     82.9643   16.5188   5.022 5.27e-07 ***
## bmi         -0.7186    0.5424  -1.325 0.185267
## icv         25.6322    2.6000   9.859 < 2e-16 ***
## ---
## Signif. codes:  0 '***' 0.001 '**' 0.01 '*' 0.05 '.' 0.1 ' ' 1
##
## Approximate significance of smooth terms:
##           edf Ref.df    F p-value
## s(bl_age)      3.582  3.582 91.914 <2e-16 ***
## s(bl_age):sleep_z 2.000  2.000  1.409  0.245
## s(bl_age):time  3.784  3.784 25.408 <2e-16 ***
## s(sleep_z):time 1.000  1.000  1.086  0.297
## ---
## Signif. codes:  0 '***' 0.001 '**' 0.01 '*' 0.05 '.' 0.1 ' ' 1
##
## R-sq.(adj) =  0.151
## lmer.REML = 62138 Scale est. = 1344.3    n = 5408

```

Below are plots of a plot of  $s(\text{bl\_age})$ ,  $s(\text{bl\_age}):\text{sleep\_z}$ ,  $s(\text{bl\_age}):\text{time}$ , and  $s(\text{sleep\_z}):\text{time}$ . For  $s(\text{sleep\_z}):\text{time}$ , roughly, if we cannot fit a straight line through the confidence bands, there is evidence that the effect of time depends on sleep duration. It is correct that the confidence interval is zero at one point along the axis; this happens because we do not include the main effect.

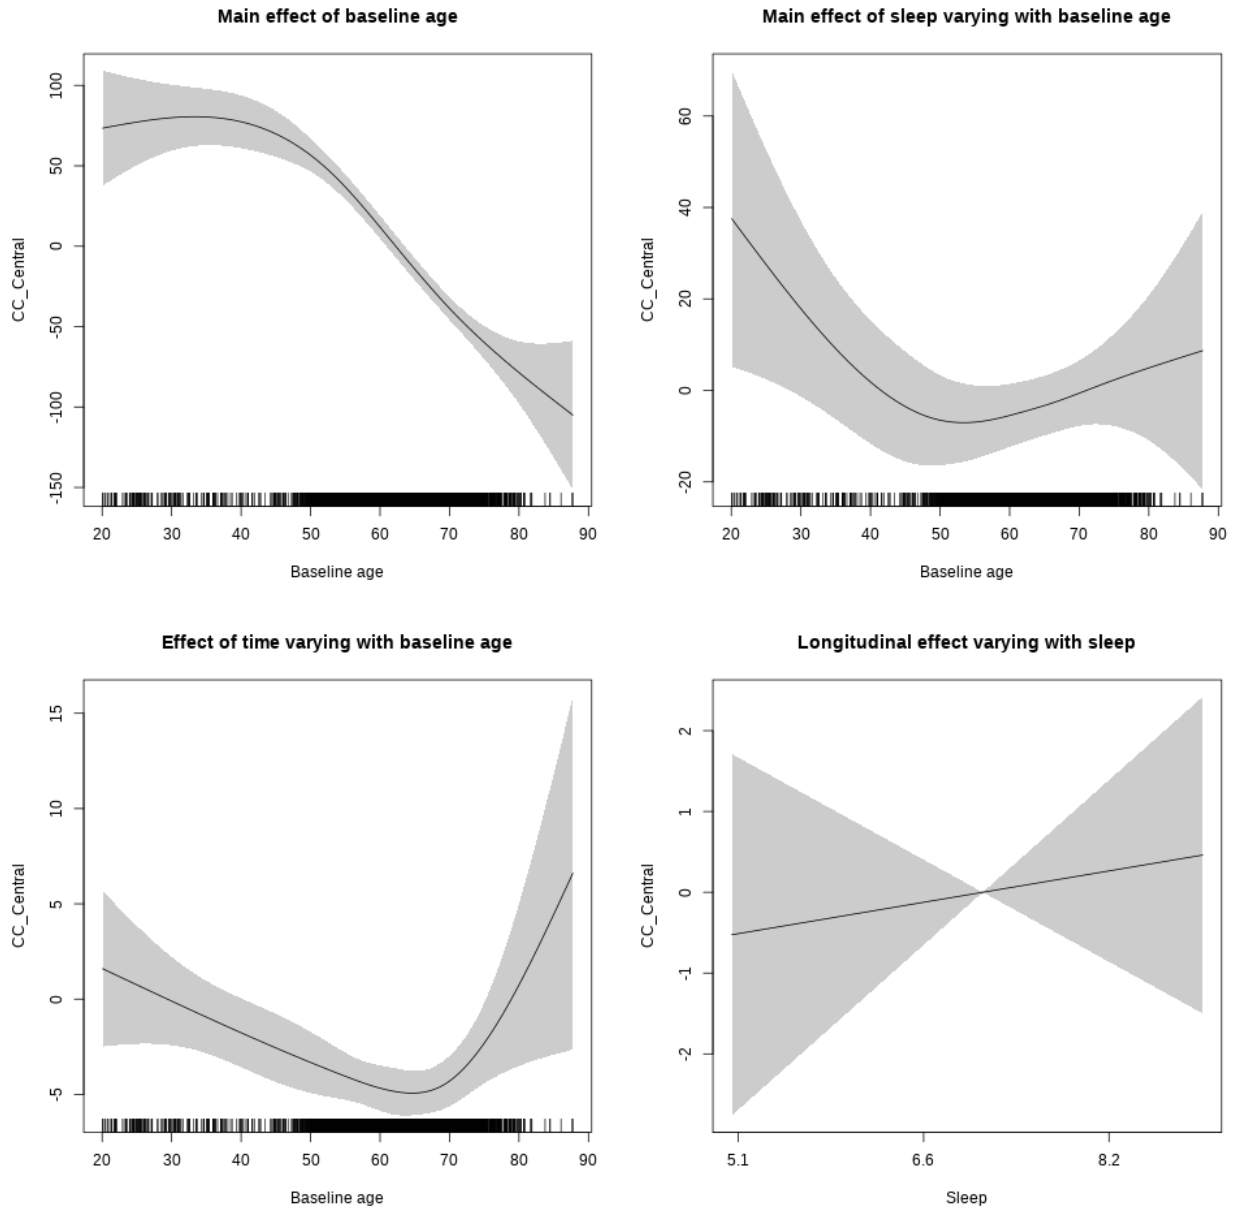

**Restricted to sleep  $\geq 5$  and  $\leq 9$  hours** Below is the row for `s(sleep_z):time` from the model output.

```
## s(sleep_z):time 1.000 1.000 0.221 0.6384
```

Below are plots of a plot of `s(bl_age)`, `s(bl_age):sleep_z`, `s(bl_age):time`, and `s(sleep_z):time`. For `s(sleep_z):time`, roughly, if we cannot fit a straight line through the confidence bands, there is evidence that the effect of time depends on sleep duration. It is correct that the confidence interval is zero at one point along the axis; this happens because we do not include the main effect.

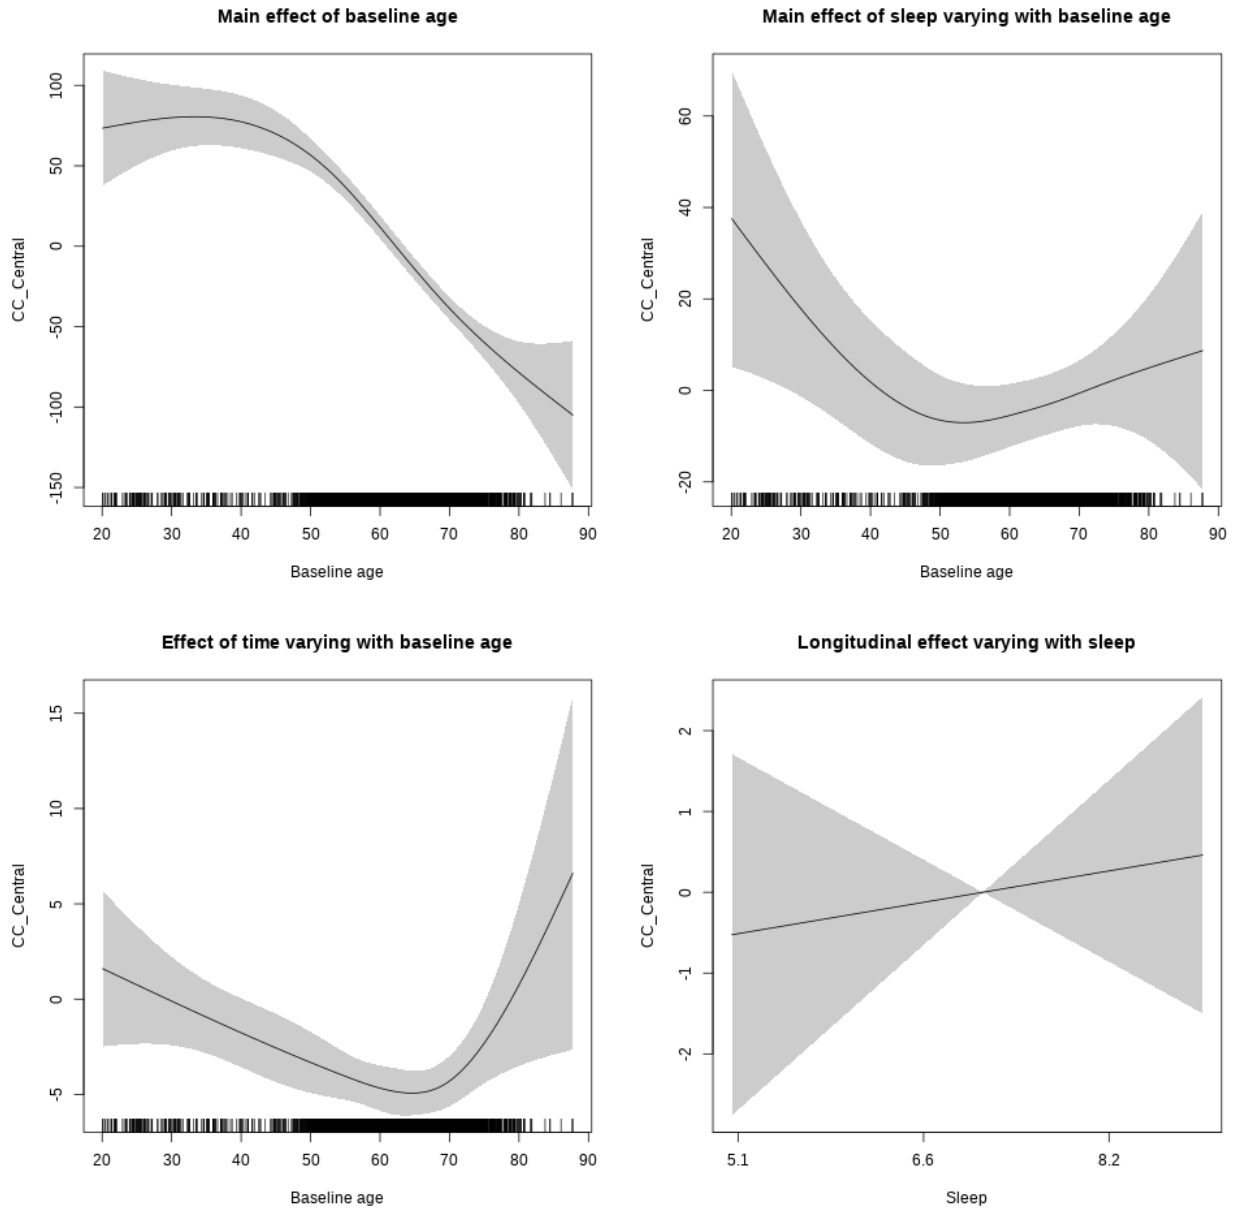

### Controlling for depression

**Full data** Below is the model output. The term `s(sleep_z):time` is probably what we care most about.

```
##
## Family: gaussian
## Link function: identity
##
## Formula:
## value ~ sex + site + depression + icv + s(bl_age, k = 10, bs = "cr") +
##   s(bl_age, by = sleep_z, bs = "cr") + +s(bl_age, by = time,
##     k = 5, bs = "cr") + s(sleep_z, by = time, k = 5, bs = "cr",
##     pc = 0)
```

```

## <environment: 0x563914fe5af8>
##
## Parametric coefficients:
##           Estimate Std. Error t value Pr(>|t|)
## (Intercept)  529.3237     9.7801  54.122 < 2e-16 ***
## sexmale      -16.6018     5.1161  -3.245  0.00118 **
## siteousAvanto -98.1983    21.3945  -4.590  4.53e-06 ***
## siteousPrisma -100.2944    39.3846  -2.547  0.01091 *
## siteousSkyra -105.7618    17.8411  -5.928  3.25e-09 ***
## siteUCAM      -23.8927    11.7466  -2.034  0.04200 *
## siteUKB       11.7027     8.9815   1.303  0.19263
## siteUmU       -0.1954    14.3080  -0.014  0.98911
## depression   -14.6110    17.9214  -0.815  0.41495
## icv           21.5778     2.4787   8.705  < 2e-16 ***
## ---
## Signif. codes:  0 '***' 0.001 '**' 0.01 '*' 0.05 '.' 0.1 ' ' 1
##
## Approximate significance of smooth terms:
##           edf Ref.df   F p-value
## s(bl_age)      3.472  3.472 97.430 <2e-16 ***
## s(bl_age):sleep_z 2.000  2.000  2.030  0.131
## s(bl_age):time  3.311  3.311 32.908 <2e-16 ***
## s(sleep_z):time  1.000  1.000  0.554  0.457
## ---
## Signif. codes:  0 '***' 0.001 '**' 0.01 '*' 0.05 '.' 0.1 ' ' 1
##
## R-sq.(adj) =  0.153
## lmer.REML = 65173 Scale est. = 1319.3    n = 5675

```

Below are plots of a plot of `s(bl_age)`, `s(bl_age):sleep_z`, `s(bl_age):time`, and `s(sleep_z):time`. For `s(sleep_z):time`, roughly, if we cannot fit a straight line through the confidence bands, there is evidence that the effect of time depends on sleep duration. It is correct that the confidence interval is zero at one point along the axis; this happens because we do not include the main effect.

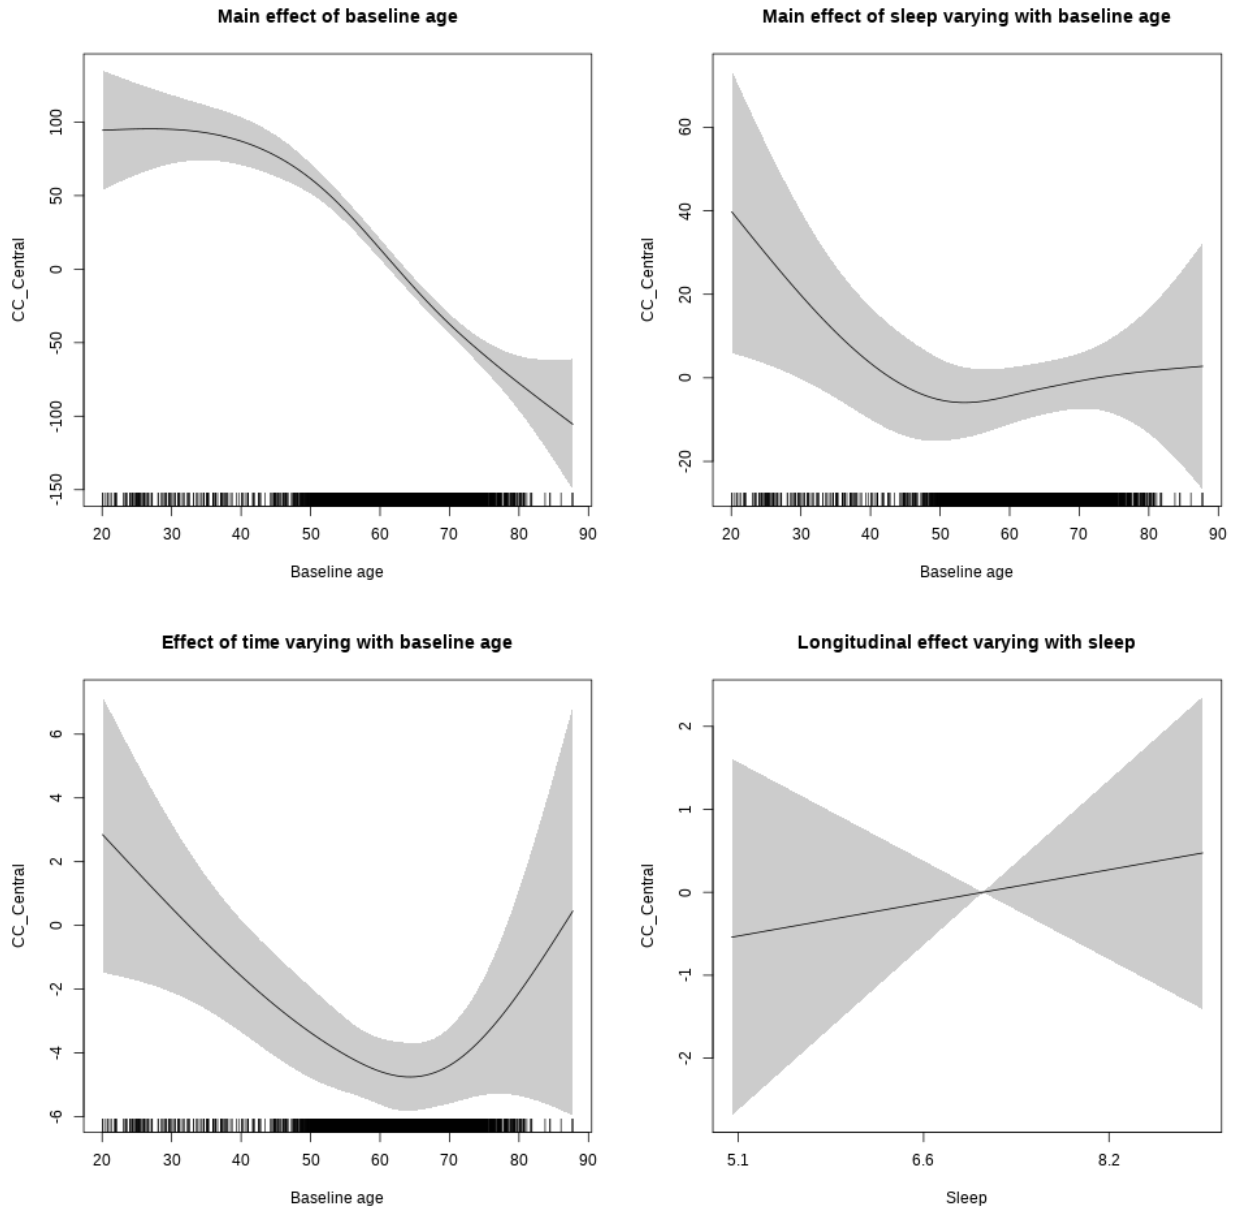

**Restricted to sleep  $\geq 5$  and  $\leq 9$  hours** Below is the row for `s(sleep_z):time` from the model output.

```
## s(sleep_z):time  1.000  1.000  0.253  0.615
```

Below are plots of a plot of `s(bl_age)`, `s(bl_age):sleep_z`, `s(bl_age):time`, and `s(sleep_z):time`. For `s(sleep_z):time`, roughly, if we cannot fit a straight line through the confidence bands, there is evidence that the effect of time depends on sleep duration. It is correct that the confidence interval is zero at one point along the axis; this happens because we do not include the main effect.



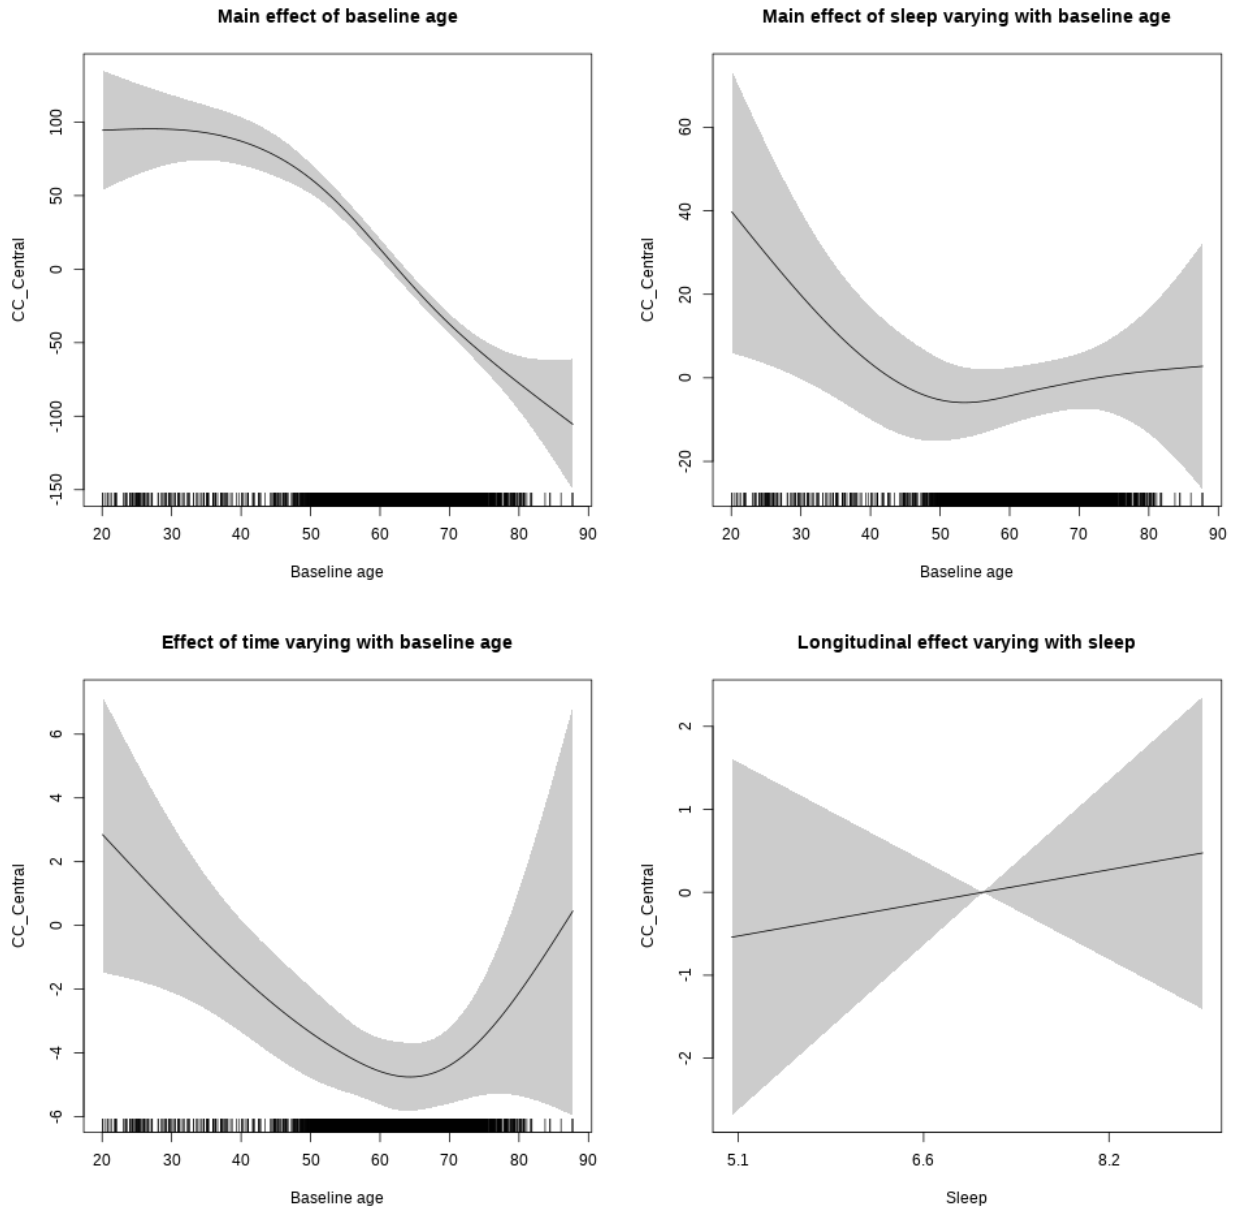

### Controlling for sleep quality

**Full data** Below is the model output. The term `s(sleep_z):time` is probably what we care most about.

```
##
## Family: gaussian
## Link function: identity
##
## Formula:
## value ~ X + s(bl_age, k = 10, bs = "cr") + s(bl_age, by = sleep_z,
##       bs = "cr") + s(bl_age, by = time, k = 5, bs = "cr") + s(sleep_z,
##       by = time, k = 5, bs = "cr", pc = 0)
## <environment: 0x563911192378>
```

```

##
## Parametric coefficients:
##               Estimate Std. Error t value Pr(>|t|)
## (Intercept)    497.153    14.092  35.279 < 2e-16 ***
## Xsexmale       13.146     5.275   2.492  0.01273 *
## XsiteousAvanto -19.372    13.482  -1.437  0.15083
## XsiteousPrisma  16.132    27.844   0.579  0.56236
## XsiteousSkyra  -36.422    13.539  -2.690  0.00717 **
## XsiteUB        -16.255    21.382  -0.760  0.44716
## XsiteUCAM      21.772    13.806   1.577  0.11486
## XsiteUKB       -41.501    42.968  -0.966  0.33417
## XsiteUmU       29.728    15.349   1.937  0.05283 .
## Xukb_dummy:sleep_accel  8.649     3.319   2.606  0.00918 **
## Xukb_dummy:chronotype  1.396     4.422   0.316  0.75224
## Xukb_dummy:dozing    13.242     9.128   1.451  0.14692
## Xukb_dummy:sleeplessness -7.124     5.684  -1.253  0.21014
## Xukb_dummy:snoring   2.179     8.056   0.270  0.78680
## Xukb_dummy:gettingup  5.877     6.187   0.950  0.34222
## Xnotukb_dummy:PSQI_Global -4.025     1.745  -2.307  0.02111 *
## ---
## Signif. codes:  0 '***' 0.001 '**' 0.01 '*' 0.05 '.' 0.1 ' ' 1
##
## Approximate significance of smooth terms:
##               edf Ref.df      F p-value
## s(bl_age)      3.272  3.272 80.335 <2e-16 ***
## s(bl_age):sleep_z 2.000  2.000  2.594  0.0748 .
## s(bl_age):time  3.338  3.338 30.081 <2e-16 ***
## s(sleep_z):time  1.000  1.000  1.850  0.1738
## ---
## Signif. codes:  0 '***' 0.001 '**' 0.01 '*' 0.05 '.' 0.1 ' ' 1
##
## R-sq.(adj) =  0.168
## lmer.REML = 48179 Scale est. = 1020      n = 4284

```

Below are plots of a plot of  $s(\text{bl\_age})$ ,  $s(\text{bl\_age}):\text{sleep\_z}$ ,  $s(\text{bl\_age}):\text{time}$ , and  $s(\text{sleep\_z}):\text{time}$ . For  $s(\text{sleep\_z}):\text{time}$ , roughly, if we cannot fit a straight line through the confidence bands, there is evidence that the effect of time depends on sleep duration. It is correct that the confidence interval is zero at one point along the axis; this happens because we do not include the main effect.

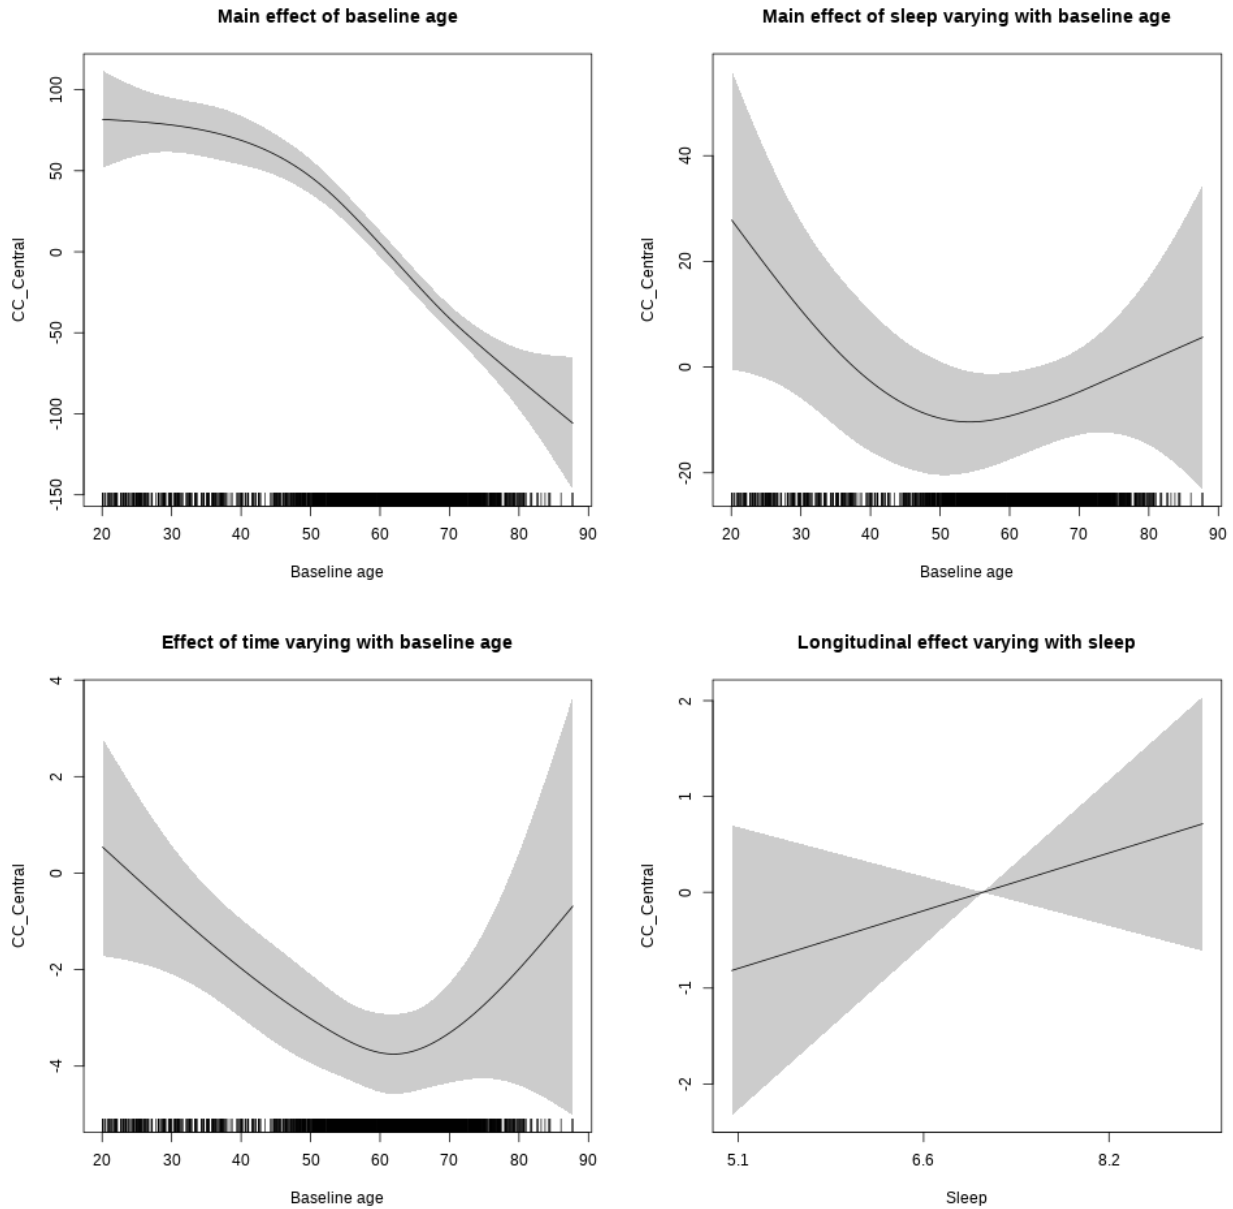

**Restricted to sleep  $\geq 5$  and  $\leq 9$  hours** Below is the row for `s(sleep_z):time` from the model output.

```
## s(sleep_z):time 1.000 1.000 1.162 0.2812
```

Below are plots of a plot of `s(bl_age)`, `s(bl_age):sleep_z`, `s(bl_age):time`, and `s(sleep_z):time`. For `s(sleep_z):time`, roughly, if we cannot fit a straight line through the confidence bands, there is evidence that the effect of time depends on sleep duration. It is correct that the confidence interval is zero at one point along the axis; this happens because we do not include the main effect.

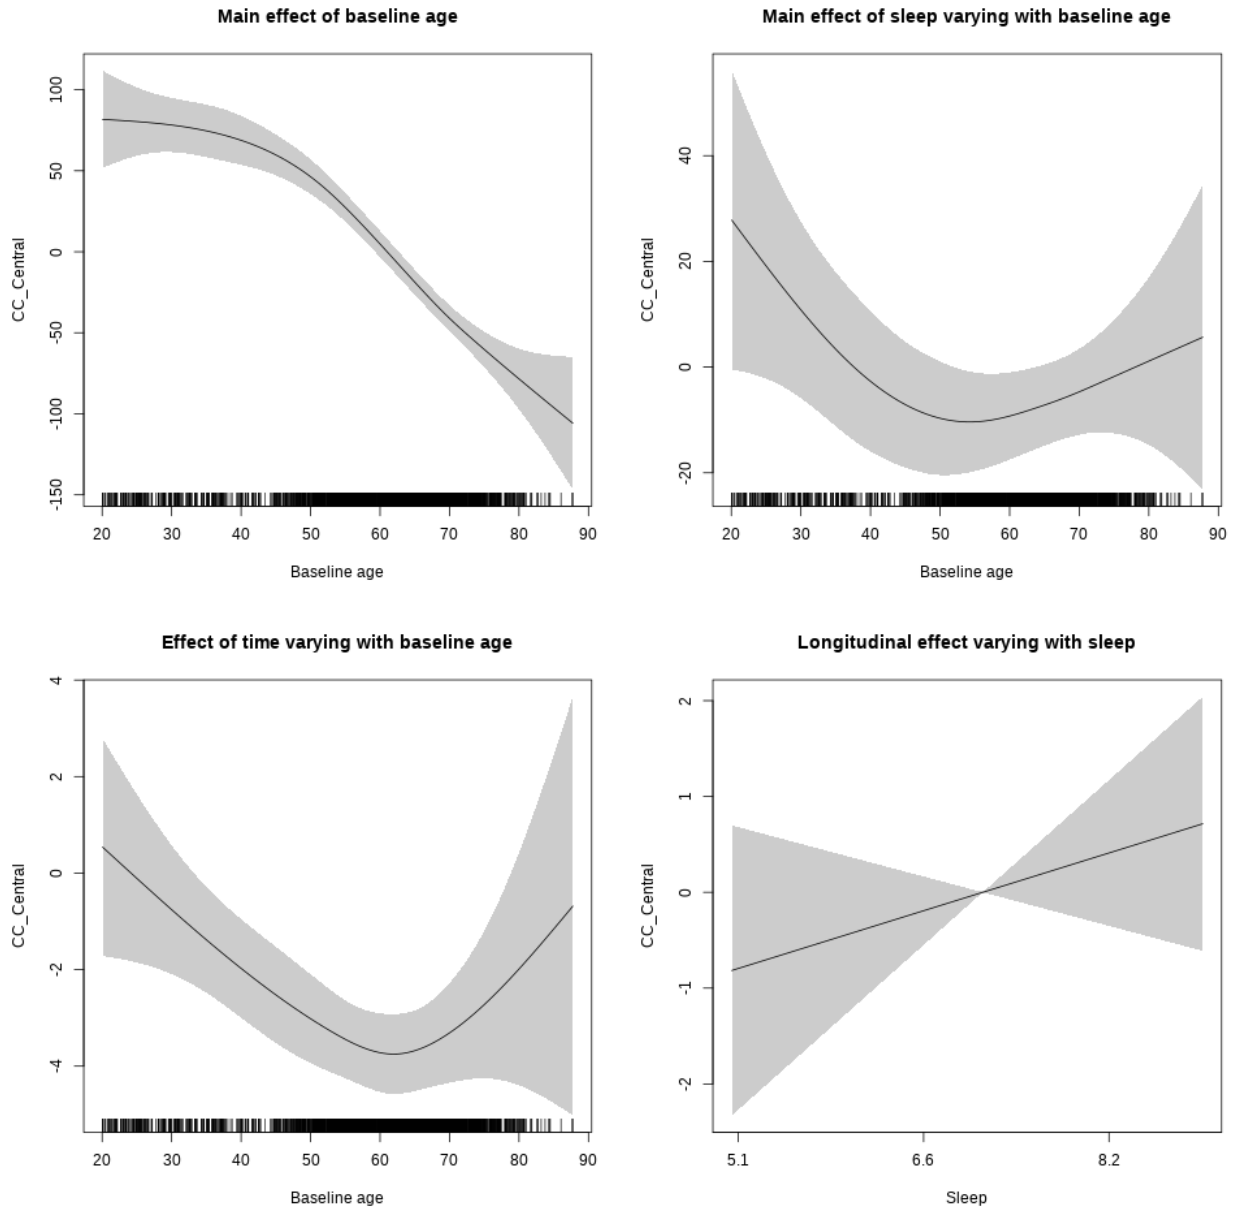

## CC\_Mid\_Anterior

### Main analysis

**Full data** Below is the model output. The term `s(sleep_z):time` is probably what we care most about.

```
##
## Family: gaussian
## Link function: identity
##
## Formula:
## value ~ sex + site + icv + s(bl_age, k = 10, bs = "cr") + s(bl_age,
##   by = sleep_z, bs = "cr") + +s(bl_age, by = time, k = 5, bs = "cr") +
```

```

##      s(sleep_z, by = time, k = 5, bs = "cr", pc = 0)
## <environment: 0x56391e8b1180>
##
## Parametric coefficients:
##           Estimate Std. Error t value Pr(>|t|)
## (Intercept)   563.829      8.595  65.599 < 2e-16 ***
## sexmale       -20.603      4.427  -4.654 3.31e-06 ***
## siteousAvanto -107.935     10.557 -10.224 < 2e-16 ***
## siteousPrisma -97.186     29.640  -3.279 0.001046 **
## siteousSkyra  -104.598     10.261 -10.194 < 2e-16 ***
## siteUB        -73.856     19.814  -3.727 0.000195 ***
## siteUCAM      -60.014     10.746  -5.585 2.42e-08 ***
## siteUKB       -14.247      8.187  -1.740 0.081872 .
## siteUmU       -38.067     12.316  -3.091 0.002003 **
## icv           34.402      2.143  16.056 < 2e-16 ***
## ---
## Signif. codes:  0 '***' 0.001 '**' 0.01 '*' 0.05 '.' 0.1 ' ' 1
##
## Approximate significance of smooth terms:
##           edf Ref.df      F p-value
## s(bl_age)      4.024  4.024 122.979 <2e-16 ***
## s(bl_age):sleep_z 2.410  2.410   3.213  0.0625 .
## s(bl_age):time  2.598  2.598  86.249 <2e-16 ***
## s(sleep_z):time  1.000  1.000   1.403  0.2362
## ---
## Signif. codes:  0 '***' 0.001 '**' 0.01 '*' 0.05 '.' 0.1 ' ' 1
##
## R-sq.(adj) =  0.195
## lmer.REML = 93162 Scale est. = 1314.1    n = 8132

```

Below are plots of a plot of  $s(\text{bl\_age})$ ,  $s(\text{bl\_age}):\text{sleep\_z}$ ,  $s(\text{bl\_age}):\text{time}$ , and  $s(\text{sleep\_z}):\text{time}$ . For  $s(\text{sleep\_z}):\text{time}$ , roughly, if we cannot fit a straight line through the confidence bands, there is evidence that the effect of time depends on sleep duration. It is correct that the confidence interval is zero at one point along the axis; this happens because we do not include the main effect.

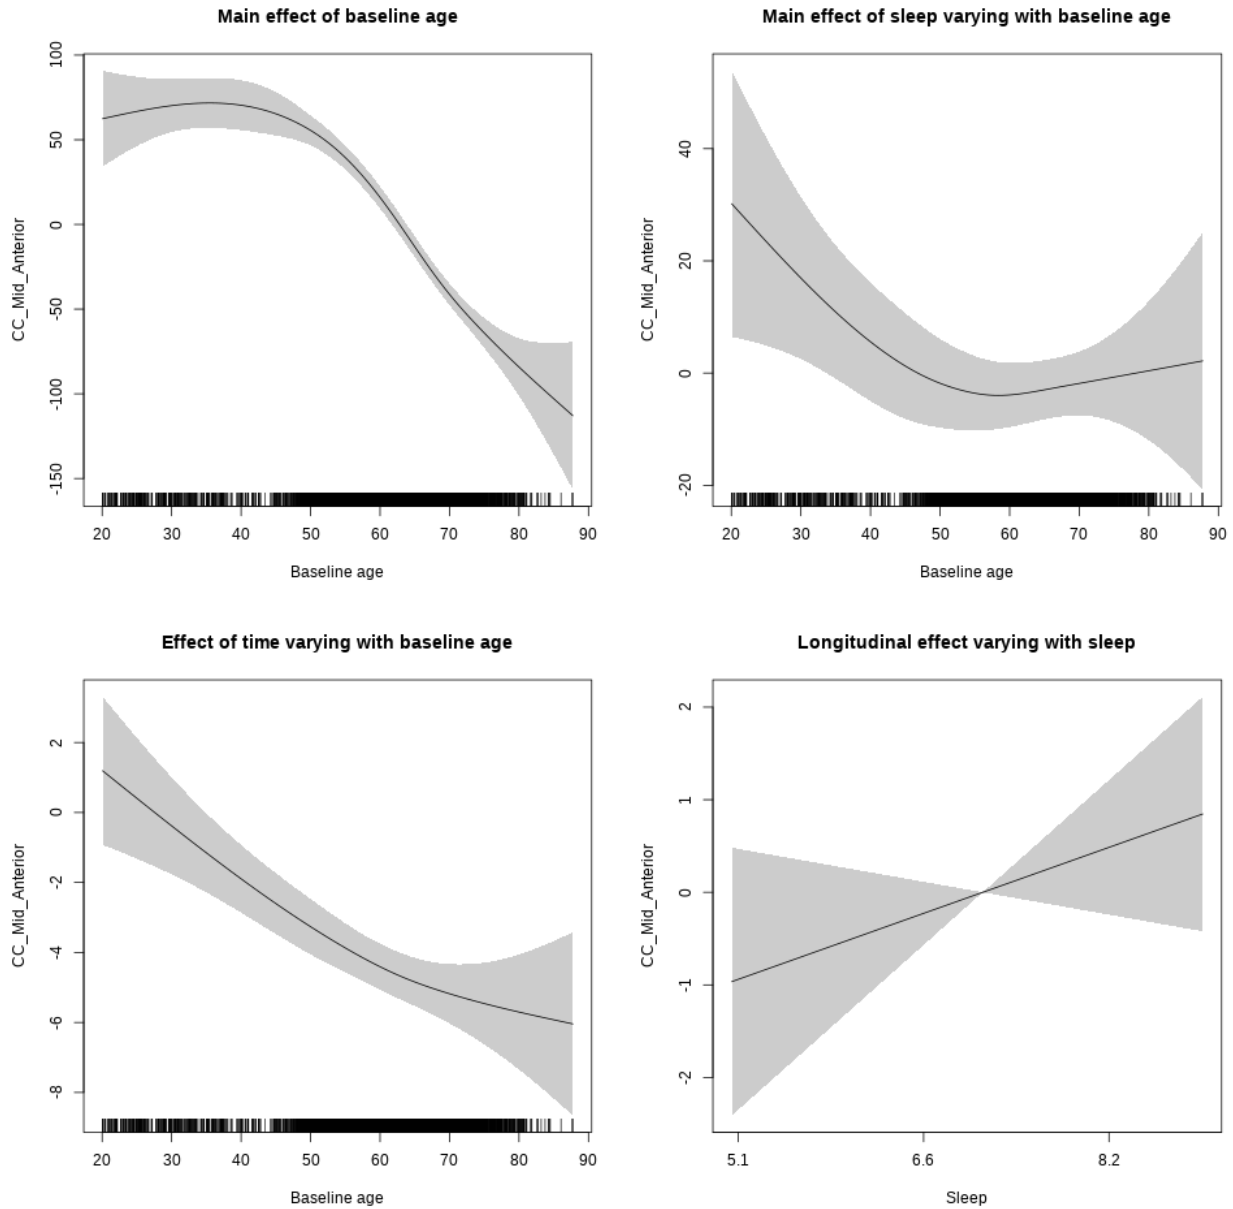

**Restricted to sleep  $\geq 5$  and  $\leq 9$  hours** Below is the row for `s(sleep_z):time` from the model output.

```
## s(sleep_z):time 1.000 1.000 1.781 0.1820
```

Below are plots of a plot of `s(bl_age)`, `s(bl_age):sleep_z`, `s(bl_age):time`, and `s(sleep_z):time`. For `s(sleep_z):time`, roughly, if we cannot fit a straight line through the confidence bands, there is evidence that the effect of time depends on sleep duration. It is correct that the confidence interval is zero at one point along the axis; this happens because we do not include the main effect.

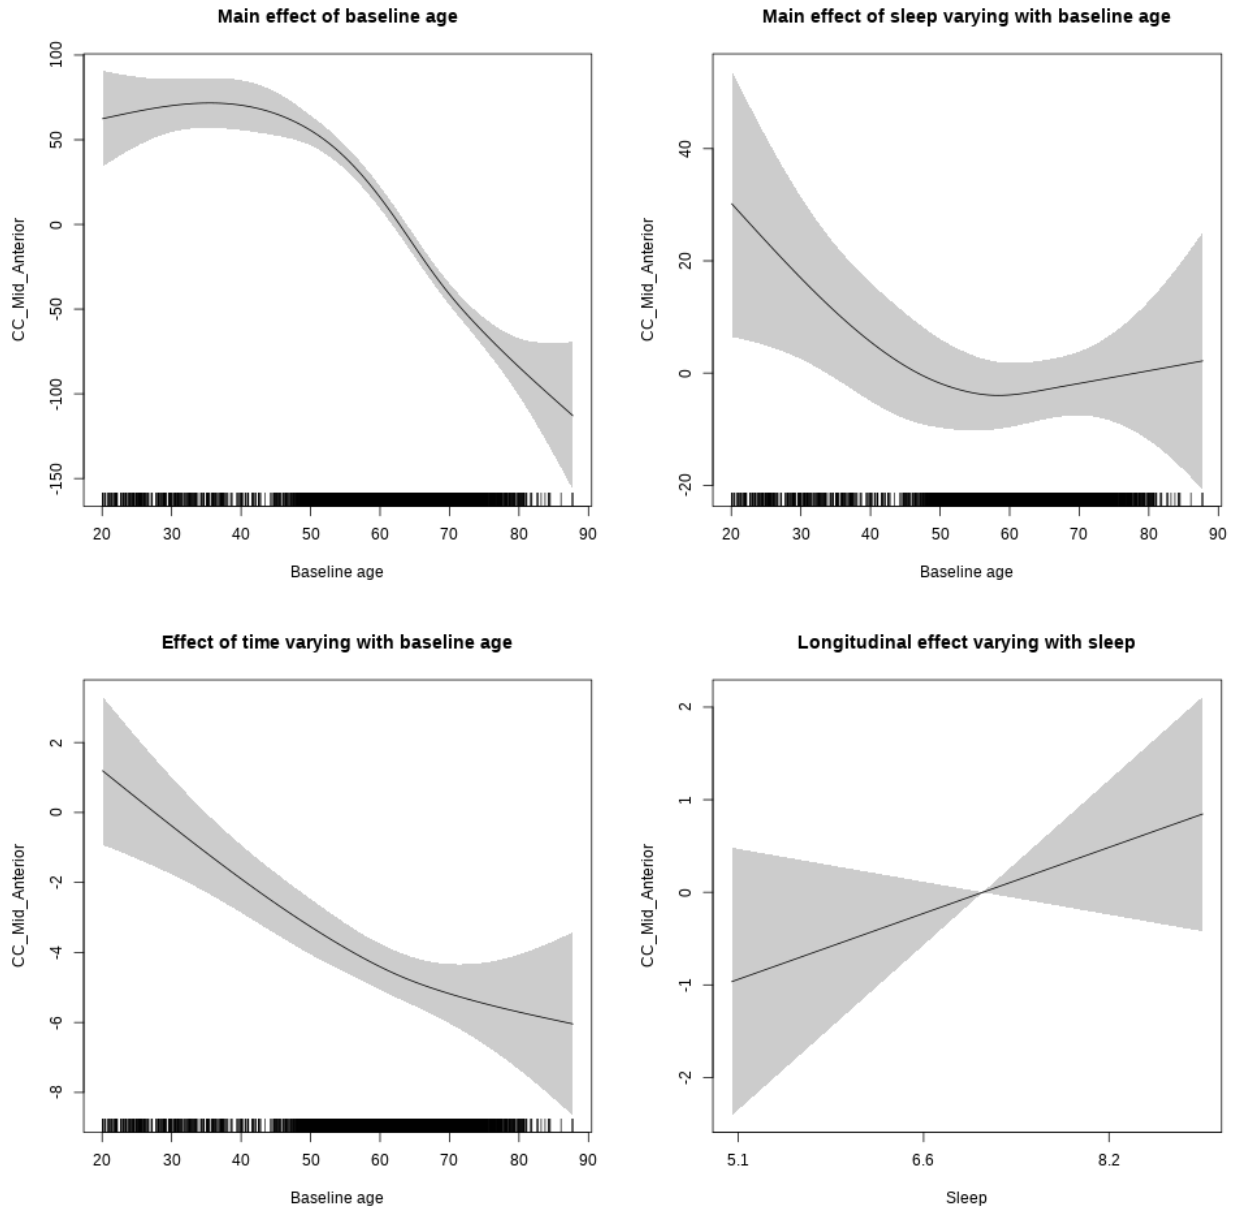

## Controlling for socioeconomic status

**Full data** Below is the model output. The term `s(sleep_z):time` is probably what we care most about.

```
##
## Family: gaussian
## Link function: identity
##
## Formula:
## value ~ sex + site + income_scaled + education_scaled + icv +
##       s(bl_age, k = 10, bs = "cr") + s(bl_age, by = sleep_z, bs = "cr") +
##       +s(bl_age, by = time, k = 5, bs = "cr") + s(sleep_z, by = time,
##       k = 5, bs = "cr", pc = 0)
```

```

## <environment: 0x5639115261a8>
##
## Parametric coefficients:
##           Estimate Std. Error t value Pr(>|t|)
## (Intercept)   580.538    21.276  27.286 < 2e-16 ***
## sexmale       -26.812     5.857  -4.578 4.82e-06 ***
## siteousAvanto -120.463    23.590  -5.106 3.41e-07 ***
## siteousPrisma -101.101    53.155  -1.902  0.0572 .
## siteousSkyra  -111.115    21.700  -5.121 3.17e-07 ***
## siteUKB       -13.996    20.115  -0.696  0.4866
## income_scaled  -4.692     7.485  -0.627  0.5308
## education_scaled -17.436    8.275  -2.107  0.0352 *
## icv           40.273     2.927  13.760 < 2e-16 ***
## ---
## Signif. codes:  0 '***' 0.001 '**' 0.01 '*' 0.05 '.' 0.1 ' ' 1
##
## Approximate significance of smooth terms:
##           edf Ref.df    F p-value
## s(bl_age)      3.444  3.444 72.604 <2e-16 ***
## s(bl_age):sleep_z 2.001  2.001  0.582  0.559
## s(bl_age):time  2.000  2.000 59.063 <2e-16 ***
## s(sleep_z):time  1.000  1.000  0.044  0.834
## ---
## Signif. codes:  0 '***' 0.001 '**' 0.01 '*' 0.05 '.' 0.1 ' ' 1
##
## R-sq.(adj) =  0.177
## lmer.REML =  53756  Scale est. = 1581.3    n = 4638

```

Below are plots of a plot of  $s(\text{bl\_age})$ ,  $s(\text{bl\_age}):\text{sleep\_z}$ ,  $s(\text{bl\_age}):\text{time}$ , and  $s(\text{sleep\_z}):\text{time}$ . For  $s(\text{sleep\_z}):\text{time}$ , roughly, if we cannot fit a straight line through the confidence bands, there is evidence that the effect of time depends on sleep duration. It is correct that the confidence interval is zero at one point along the axis; this happens because we do not include the main effect.



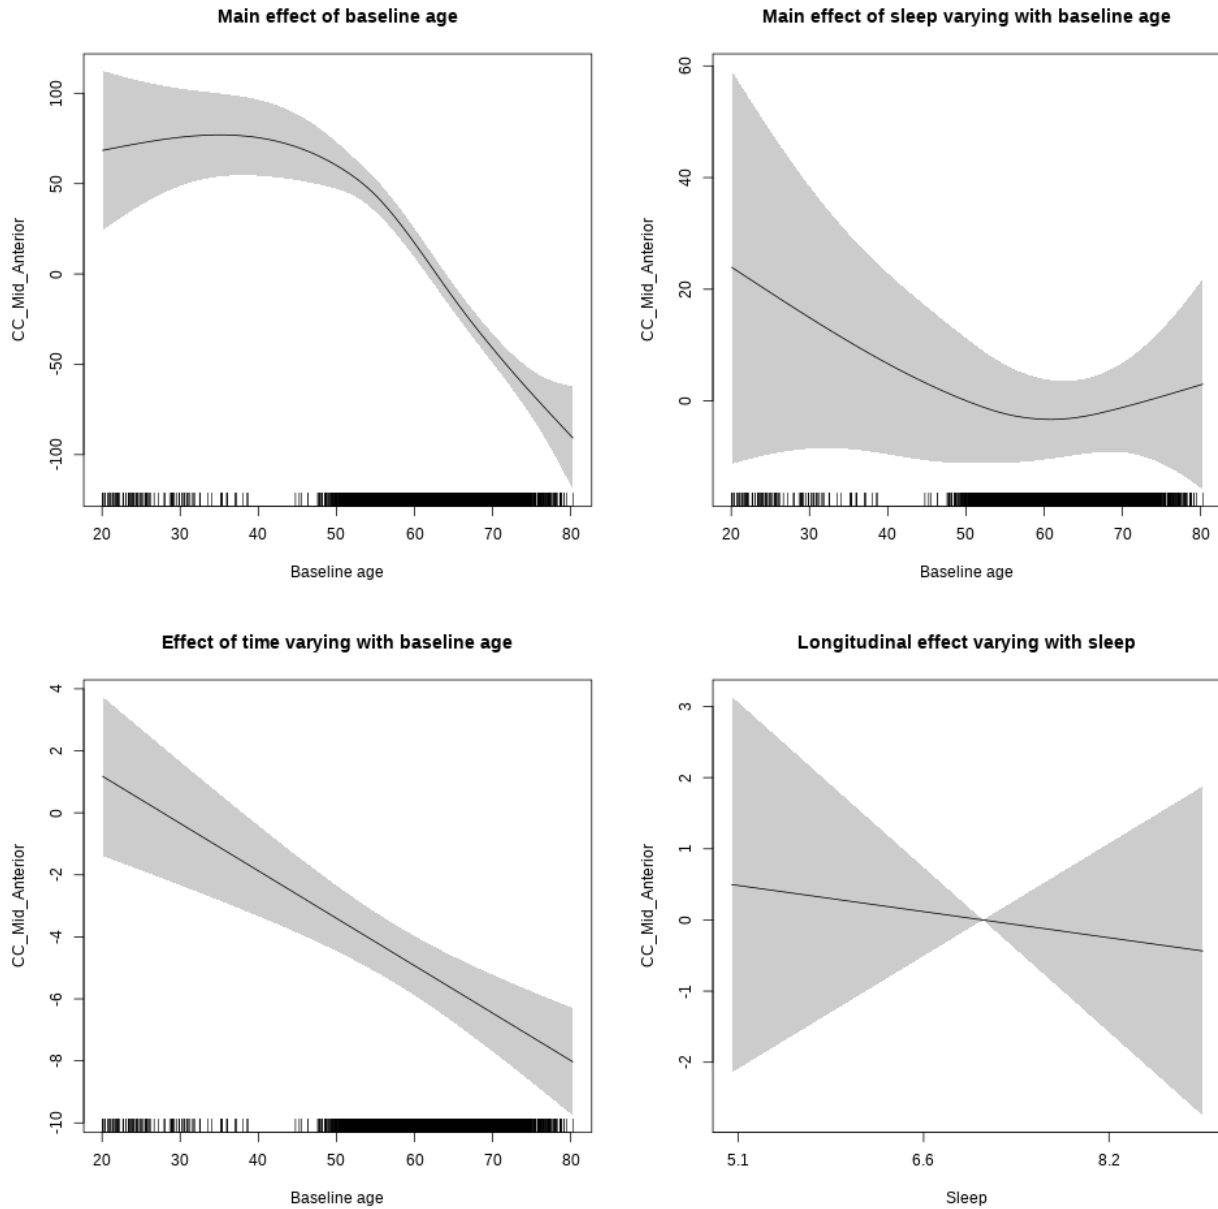

**Restricted to sleep  $\geq 5$  and  $\leq 9$  hours** Below is the row for `s(sleep_z):time` from the model output.

```
## s(sleep_z):time  1.000  1.000  0.142  0.706
```

Below are plots of a plot of `s(bl_age)`, `s(bl_age):sleep_z`, `s(bl_age):time`, and `s(sleep_z):time`. For `s(sleep_z):time`, roughly, if we cannot fit a straight line through the confidence bands, there is evidence that the effect of time depends on sleep duration. It is correct that the confidence interval is zero at one point along the axis; this happens because we do not include the main effect.



## Controlling for BMI

**Full data** Below is the model output. The term `s(sleep_z):time` is probably what we care most about.

```
##
## Family: gaussian
## Link function: identity
##
## Formula:
## value ~ sex + site + bmi + icv + s(bl_age, k = 10, bs = "cr") +
##   s(bl_age, by = sleep_z, bs = "cr") + s(bl_age, by = time,
##     k = 5, bs = "cr") + s(sleep_z, by = time, k = 5, bs = "cr",
##     pc = 0)
```

```

## <environment: 0x56390d705bb0>
##
## Parametric coefficients:
##           Estimate Std. Error t value Pr(>|t|)
## (Intercept)  479.3422    19.1897  24.979 < 2e-16 ***
## sexmale      -20.2357     5.3221  -3.802 0.000145 ***
## siteousPrisma 10.5392    30.8568   0.342 0.732702
## siteousSkyra   6.4182     9.7384   0.659 0.509888
## siteUCAM      46.0625    14.8742   3.097 0.001966 **
## siteUKB       90.0374    13.9221   6.467 1.09e-10 ***
## siteUmU       74.7093    16.8524   4.433 9.47e-06 ***
## bmi          -0.8638     0.5488  -1.574 0.115524
## icv           38.0056     2.6529  14.326 < 2e-16 ***
## ---
## Signif. codes:  0 '***' 0.001 '**' 0.01 '*' 0.05 '.' 0.1 ' ' 1
##
## Approximate significance of smooth terms:
##           edf Ref.df    F p-value
## s(bl_age)      4.154  4.154 81.724 <2e-16 ***
## s(bl_age):sleep_z 2.000  2.000  2.172  0.114
## s(bl_age):time  2.000  2.000 54.759 <2e-16 ***
## s(sleep_z):time 1.000  1.000  1.093  0.296
## ---
## Signif. codes:  0 '***' 0.001 '**' 0.01 '*' 0.05 '.' 0.1 ' ' 1
##
## R-sq.(adj) =  0.186
## lmer.REML = 62329  Scale est. = 1474.1    n = 5398

```

Below are plots of a plot of `s(bl_age)`, `s(bl_age):sleep_z`, `s(bl_age):time`, and `s(sleep_z):time`. For `s(sleep_z):time`, roughly, if we cannot fit a straight line through the confidence bands, there is evidence that the effect of time depends on sleep duration. It is correct that the confidence interval is zero at one point along the axis; this happens because we do not include the main effect.

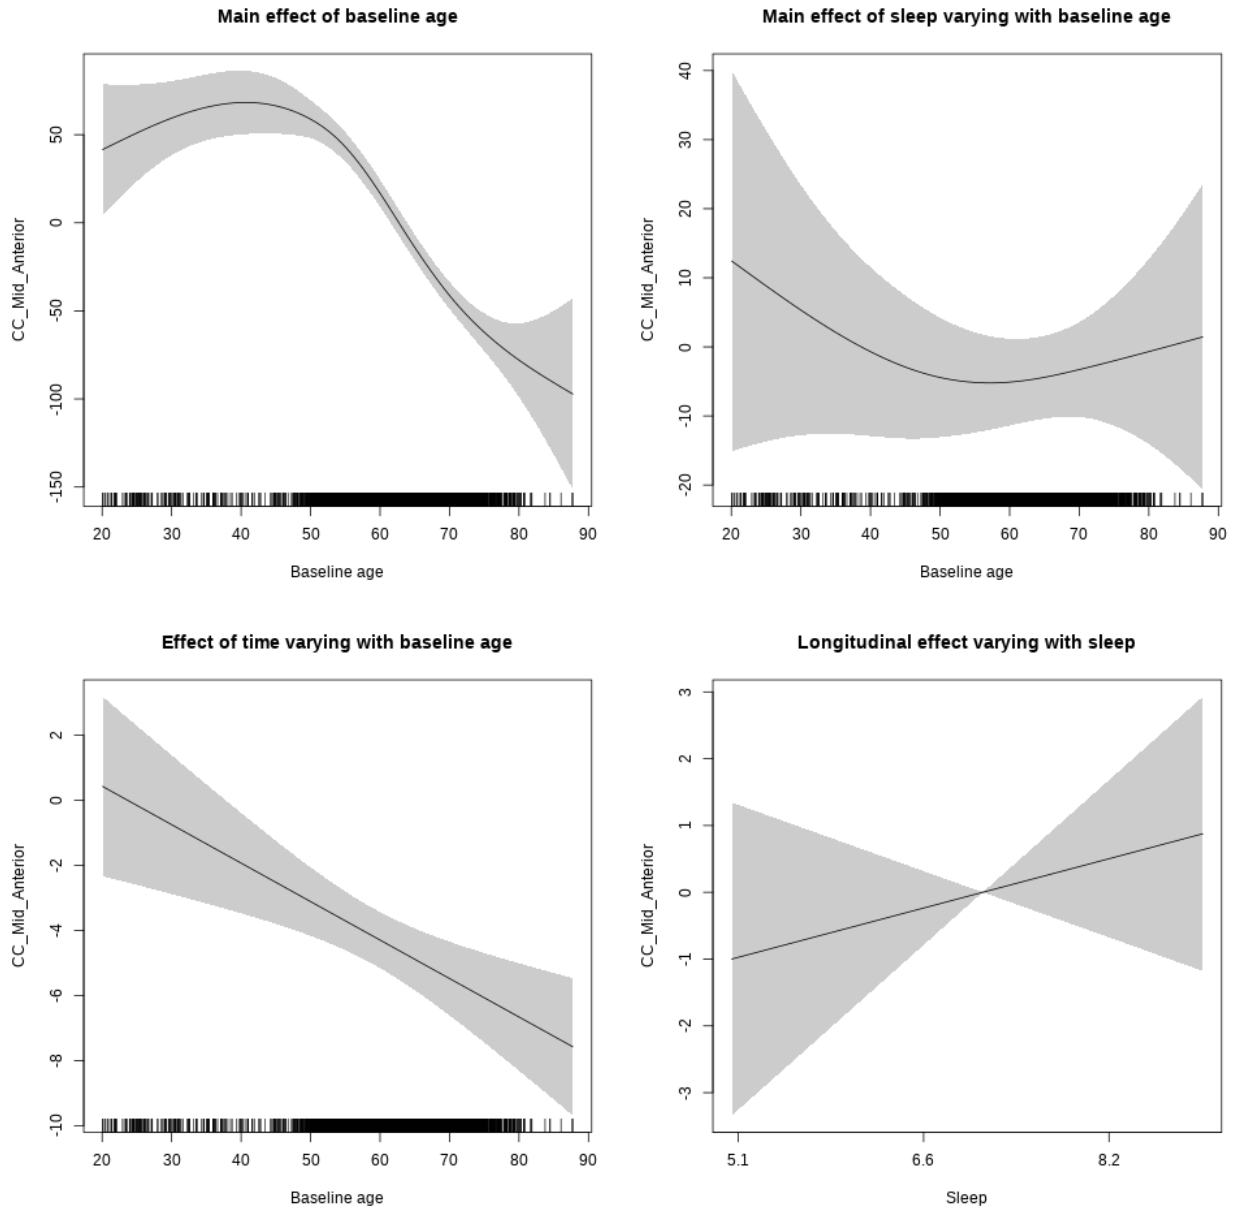

**Restricted to sleep  $\geq 5$  and  $\leq 9$  hours** Below is the row for `s(sleep_z):time` from the model output.

```
## s(sleep_z):time  1.000  1.000  0.728  0.394
```

Below are plots of a plot of `s(bl_age)`, `s(bl_age):sleep_z`, `s(bl_age):time`, and `s(sleep_z):time`. For `s(sleep_z):time`, roughly, if we cannot fit a straight line through the confidence bands, there is evidence that the effect of time depends on sleep duration. It is correct that the confidence interval is zero at one point along the axis; this happens because we do not include the main effect.



## Controlling for depression

**Full data** Below is the model output. The term `s(sleep_z):time` is probably what we care most about.

```
##
## Family: gaussian
## Link function: identity
##
## Formula:
## value ~ sex + site + depression + icv + s(bl_age, k = 10, bs = "cr") +
##       s(bl_age, by = sleep_z, bs = "cr") + +s(bl_age, by = time,
##       k = 5, bs = "cr") + s(sleep_z, by = time, k = 5, bs = "cr",
##       pc = 0)
```

```

## <environment: 0x5639111c6b30>
##
## Parametric coefficients:
##           Estimate Std. Error t value Pr(>|t|)
## (Intercept)   550.026    10.015   54.918 < 2e-16 ***
## sexmale       -17.877     5.235   -3.415 0.000643 ***
## siteousAvanto -112.018    22.002   -5.091 3.67e-07 ***
## siteousPrisma -103.846    40.877   -2.540 0.011097 *
## siteousSkyra  -112.105    18.279   -6.133 9.21e-10 ***
## siteUCAM      -54.934    12.057   -4.556 5.32e-06 ***
## siteUKB       -8.115     9.195   -0.883 0.377510
## siteUmU       -38.185    14.617   -2.612 0.009014 **
## depression    27.609    18.307    1.508 0.131580
## icv           33.062     2.550   12.966 < 2e-16 ***
## ---
## Signif. codes:  0 '***' 0.001 '**' 0.01 '*' 0.05 '.' 0.1 ' ' 1
##
## Approximate significance of smooth terms:
##           edf Ref.df      F p-value
## s(bl_age)      4.004  4.004 82.817 <2e-16 ***
## s(bl_age):sleep_z 2.000  2.000  1.895  0.150
## s(bl_age):time  2.000  2.000 63.518 <2e-16 ***
## s(sleep_z):time 1.000  1.000  0.729  0.393
## ---
## Signif. codes:  0 '***' 0.001 '**' 0.01 '*' 0.05 '.' 0.1 ' ' 1
##
## R-sq.(adj) =  0.177
## lmer.REML = 65411 Scale est. = 1434.8    n = 5665

```

Below are plots of a plot of `s(bl_age)`, `s(bl_age):sleep_z`, `s(bl_age):time`, and `s(sleep_z):time`. For `s(sleep_z):time`, roughly, if we cannot fit a straight line through the confidence bands, there is evidence that the effect of time depends on sleep duration. It is correct that the confidence interval is zero at one point along the axis; this happens because we do not include the main effect.

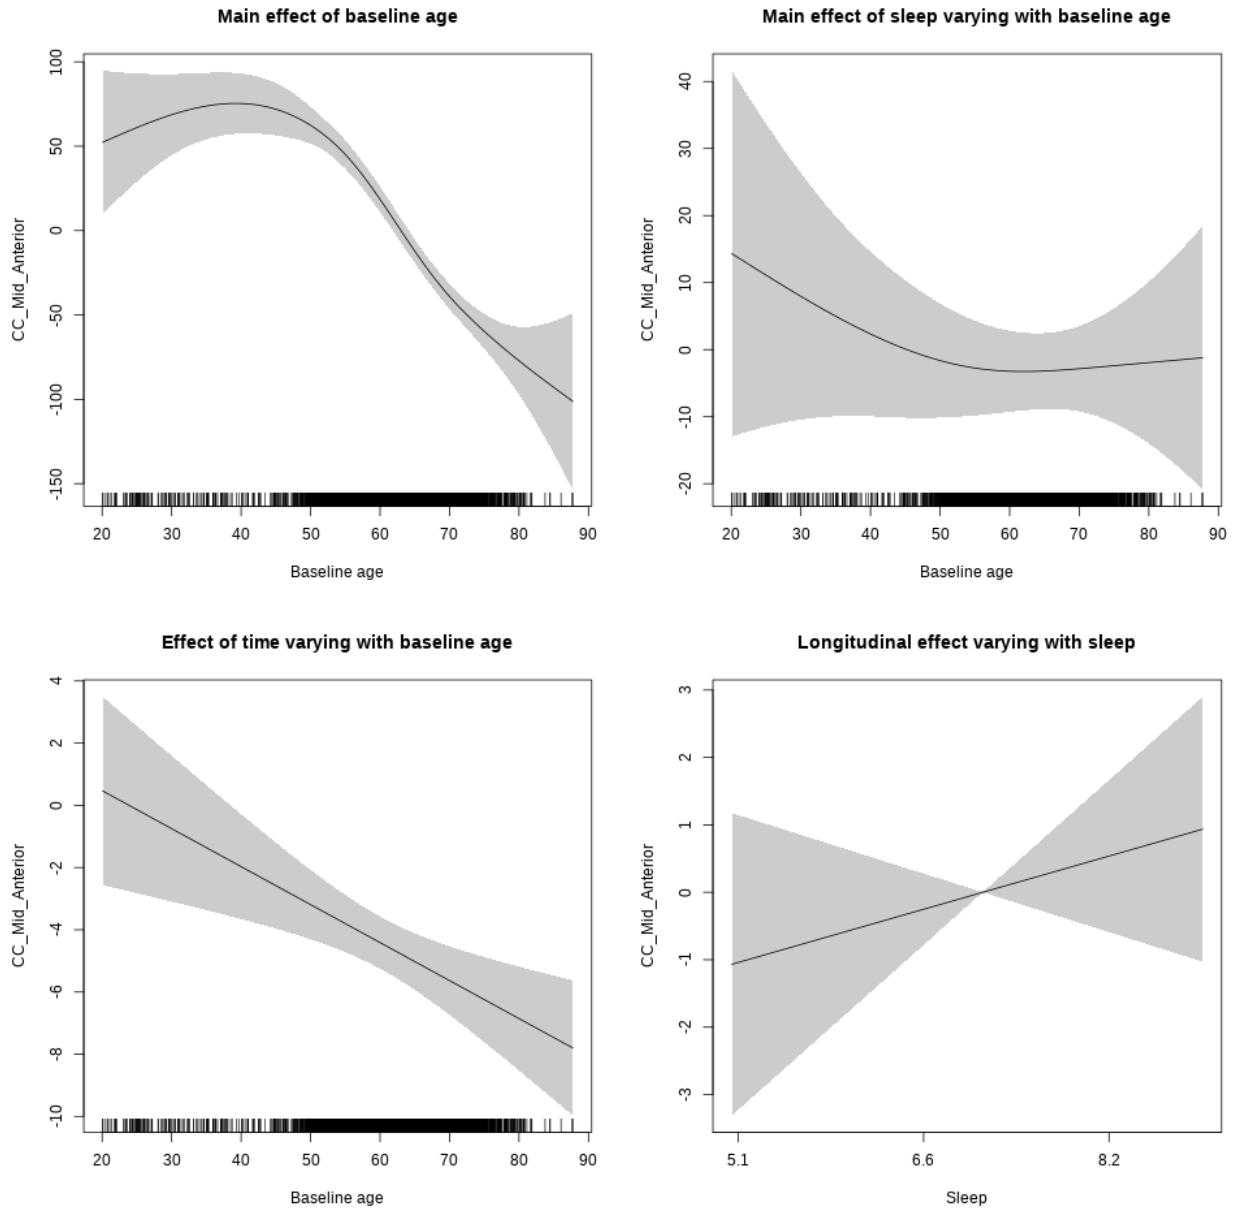

**Restricted to sleep  $\geq 5$  and  $\leq 9$  hours** Below is the row for `s(sleep_z):time` from the model output.

```
## s(sleep_z):time  1.000  1.000  0.907  0.341
```

Below are plots of a plot of `s(bl_age)`, `s(bl_age):sleep_z`, `s(bl_age):time`, and `s(sleep_z):time`. For `s(sleep_z):time`, roughly, if we cannot fit a straight line through the confidence bands, there is evidence that the effect of time depends on sleep duration. It is correct that the confidence interval is zero at one point along the axis; this happens because we do not include the main effect.



### Controlling for sleep quality

**Full data** Below is the model output. The term `s(sleep_z):time` is probably what we care most about.

```
##
## Family: gaussian
## Link function: identity
##
## Formula:
## value ~ X + s(bl_age, k = 10, bs = "cr") + s(bl_age, by = sleep_z,
##       bs = "cr") + s(bl_age, by = time, k = 5, bs = "cr") + s(sleep_z,
##       by = time, k = 5, bs = "cr", pc = 0)
## <environment: 0x563911801560>
```



```

##
## Parametric coefficients:
##              Estimate Std. Error t value Pr(>|t|)
## (Intercept)      489.698    14.571  33.609 < 2e-16 ***
## Xsexmale          31.303     5.454   5.740 1.01e-08 ***
## XsiteousAvanto   -22.994    13.951  -1.648 0.09939 .
## XsiteousPrisma    2.215    28.529   0.078 0.93812
## XsiteousSkyra   -34.114    14.009  -2.435 0.01493 *
## XsiteUB          -21.003    22.083  -0.951 0.34161
## XsiteUCAM         9.105    14.330   0.635 0.52521
## XsiteUKB        -60.490    44.567  -1.357 0.17476
## XsiteUmU         15.138    15.865   0.954 0.34005
## Xukb_dummy:sleep_accel  9.752     3.425   2.847 0.00444 **
## Xukb_dummy:chronotype  6.213     4.580   1.356 0.17506
## Xukb_dummy:dozing   20.565     9.435   2.180 0.02935 *
## Xukb_dummy:sleeplessness -5.898     5.885  -1.002 0.31637
## Xukb_dummy:snoring   8.624     8.333   1.035 0.30077
## Xukb_dummy:gettingup  2.445     6.428   0.380 0.70368
## Xnotukb_dummy:PSQI_Global -2.608     1.803  -1.447 0.14811
## ---
## Signif. codes:  0 '***' 0.001 '**' 0.01 '*' 0.05 '.' 0.1 ' ' 1
##
## Approximate significance of smooth terms:
##              edf Ref.df      F p-value
## s(bl_age)          4.043  4.043 64.549 <2e-16 ***
## s(bl_age):sleep_z  2.000  2.000  2.434 0.0878 .
## s(bl_age):time     2.000  2.000 68.358 <2e-16 ***
## s(sleep_z):time    1.000  1.000  5.157 0.0232 *
## ---
## Signif. codes:  0 '***' 0.001 '**' 0.01 '*' 0.05 '.' 0.1 ' ' 1
##
## R-sq.(adj) =  0.18
## lmer.REML = 48263  Scale est. = 1064.1    n = 4272

```

Below are plots of a plot of  $s(\text{bl\_age})$ ,  $s(\text{bl\_age}):\text{sleep\_z}$ ,  $s(\text{bl\_age}):\text{time}$ , and  $s(\text{sleep\_z}):\text{time}$ . For  $s(\text{sleep\_z}):\text{time}$ , roughly, if we cannot fit a straight line through the confidence bands, there is evidence that the effect of time depends on sleep duration. It is correct that that confidence interval is zero at one point along the axis; this happens because we do not include the main effect.

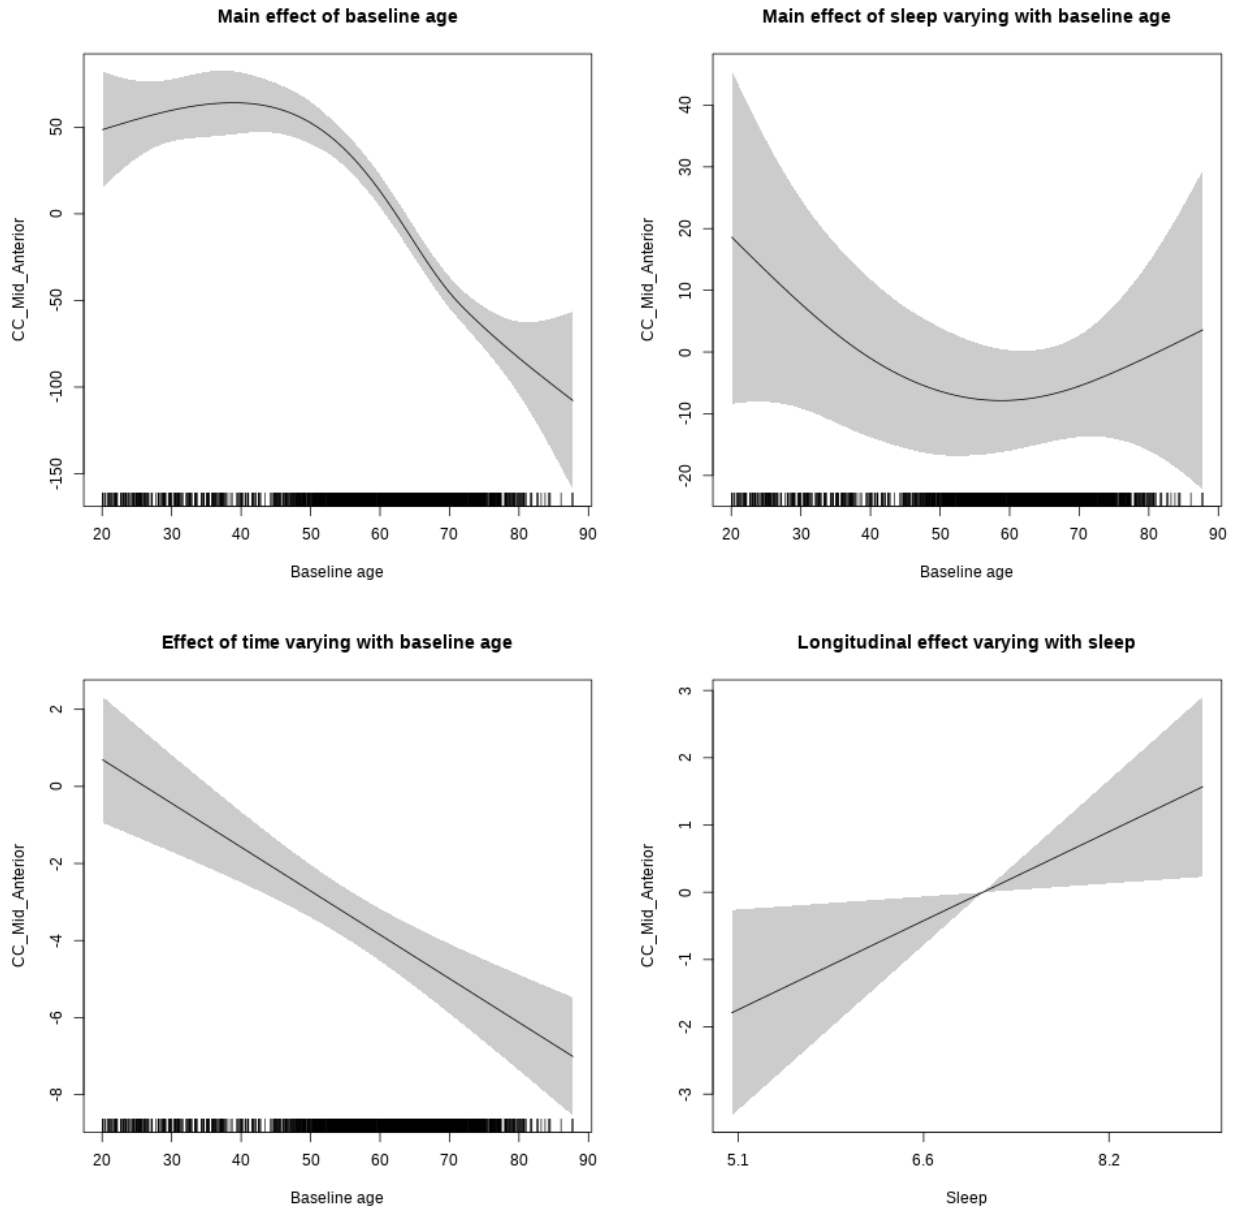

**Restricted to sleep  $\geq 5$  and  $\leq 9$  hours** Below is the row for `s(sleep_z):time` from the model output.

```
## s(sleep_z):time  1.000  1.000  5.494  0.0191 *
```

Below are plots of a plot of `s(bl_age)`, `s(bl_age):sleep_z`, `s(bl_age):time`, and `s(sleep_z):time`. For `s(sleep_z):time`, roughly, if we cannot fit a straight line through the confidence bands, there is evidence that the effect of time depends on sleep duration. It is correct that the confidence interval is zero at one point along the axis; this happens because we do not include the main effect.

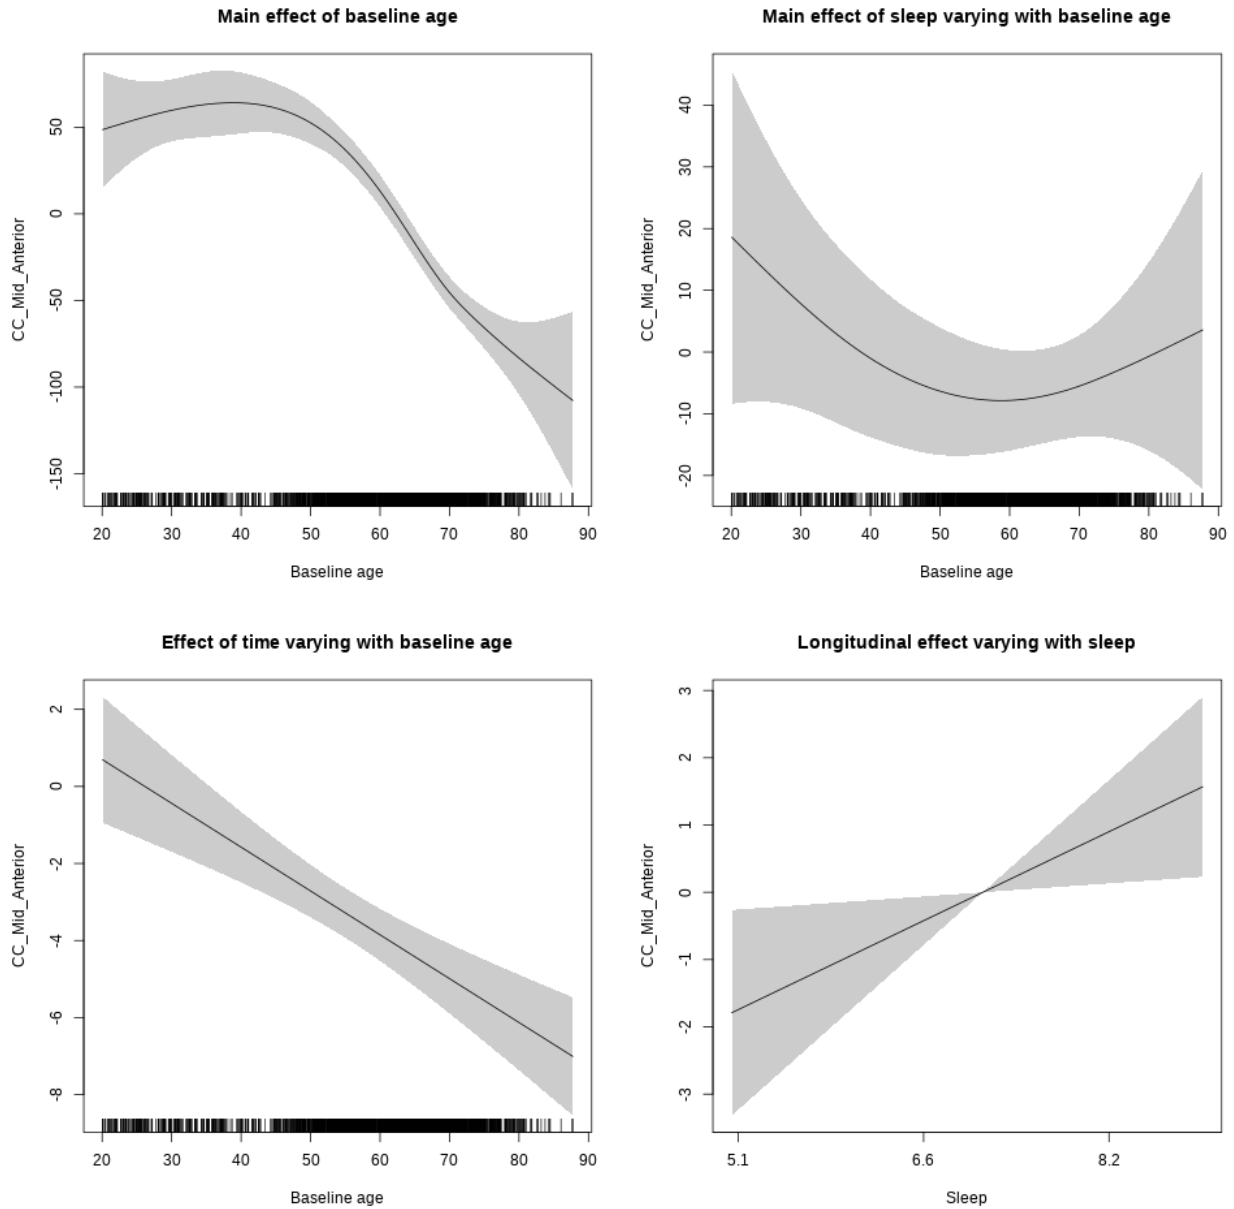

## CC\_Mid\_Posterior

### Main analysis

**Full data** Below is the model output. The term `s(sleep_z):time` is probably what we care most about.

```
##
## Family: gaussian
## Link function: identity
##
## Formula:
## value ~ sex + site + icv + s(bl_age, k = 10, bs = "cr") + s(bl_age,
##   by = sleep_z, bs = "cr") + +s(bl_age, by = time, k = 5, bs = "cr") +
```

```

##      s(sleep_z, by = time, k = 5, bs = "cr", pc = 0)
## <environment: 0x563910f11008>
##
## Parametric coefficients:
##           Estimate Std. Error t value Pr(>|t|)
## (Intercept)   543.492     7.370  73.741 < 2e-16 ***
## sexmale       -18.605     3.806  -4.888 1.04e-06 ***
## siteousAvanto -76.370     9.050  -8.439 < 2e-16 ***
## siteousPrisma -16.092    22.740  -0.708 0.47919
## siteousSkyra  -91.132     8.800 -10.356 < 2e-16 ***
## siteUB        -51.131    17.117  -2.987 0.00282 **
## siteUCAM      -45.675     9.186  -4.973 6.74e-07 ***
## siteUKB       14.291     7.010   2.039 0.04152 *
## siteUmU      -17.164    10.611  -1.618 0.10581
## icv           26.335     1.820  14.471 < 2e-16 ***
## ---
## Signif. codes:  0 '***' 0.001 '**' 0.01 '*' 0.05 '.' 0.1 ' ' 1
##
## Approximate significance of smooth terms:
##           edf Ref.df      F p-value
## s(bl_age)      2.788  2.788 144.535 <2e-16 ***
## s(bl_age):sleep_z 2.000  2.000   0.421   0.657
## s(bl_age):time  2.000  2.000 146.645 <2e-16 ***
## s(sleep_z):time  1.000  1.000   0.028   0.868
## ---
## Signif. codes:  0 '***' 0.001 '**' 0.01 '*' 0.05 '.' 0.1 ' ' 1
##
## R-sq.(adj) =  0.196
## lmer.REML = 89355 Scale est. = 736.13    n = 8114

```

Below are plots of a plot of  $s(\text{bl\_age})$ ,  $s(\text{bl\_age}):\text{sleep\_z}$ ,  $s(\text{bl\_age}):\text{time}$ , and  $s(\text{sleep\_z}):\text{time}$ . For  $s(\text{sleep\_z}):\text{time}$ , roughly, if we cannot fit a straight line through the confidence bands, there is evidence that the effect of time depends on sleep duration. It is correct that the confidence interval is zero at one point along the axis; this happens because we do not include the main effect.

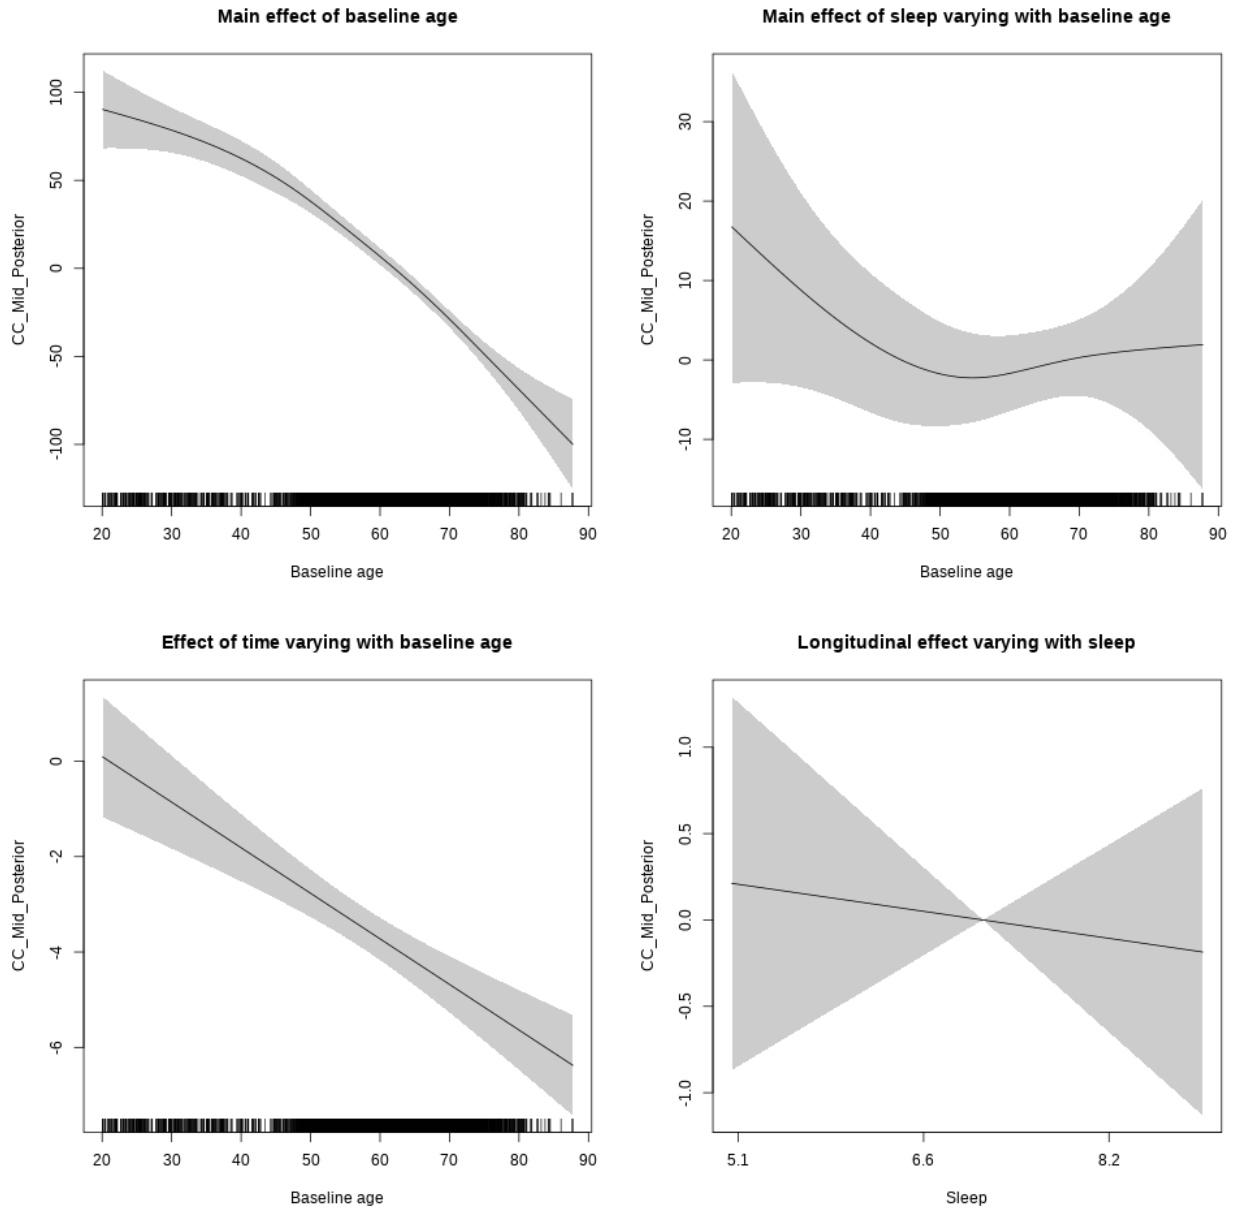

**Restricted to sleep  $\geq 5$  and  $\leq 9$  hours** Below is the row for `s(sleep_z):time` from the model output.

```
## s(sleep_z):time  1.000  1.000  0.154  0.695
```

Below are plots of a plot of `s(bl_age)`, `s(bl_age):sleep_z`, `s(bl_age):time`, and `s(sleep_z):time`. For `s(sleep_z):time`, roughly, if we cannot fit a straight line through the confidence bands, there is evidence that the effect of time depends on sleep duration. It is correct that the confidence interval is zero at one point along the axis; this happens because we do not include the main effect.



### Controlling for socioeconomic status

**Full data** Below is the model output. The term `s(sleep_z):time` is probably what we care most about.

```
##
## Family: gaussian
## Link function: identity
##
## Formula:
## value ~ sex + site + income_scaled + education_scaled + icv +
##       s(bl_age, k = 10, bs = "cr") + s(bl_age, by = sleep_z, bs = "cr") +
##       +s(bl_age, by = time, k = 5, bs = "cr") + s(sleep_z, by = time,
##       k = 5, bs = "cr", pc = 0)
```

```

## <environment: 0x56391e7cac68>
##
## Parametric coefficients:
##           Estimate Std. Error t value Pr(>|t|)
## (Intercept)  528.3024   18.3165  28.843 < 2e-16 ***
## sexmale      -25.0482    5.0420  -4.968 7.01e-07 ***
## siteousAvanto -59.7970   19.9856  -2.992 0.002786 **
## siteousPrisma -13.9781   40.0209  -0.349 0.726902
## siteousSkyra -67.0974   18.7186  -3.585 0.000341 ***
## siteUKB       31.0684   17.3241   1.793 0.072980 .
## income_scaled  0.1082    6.4638   0.017 0.986646
## education_scaled -1.9616   7.1690  -0.274 0.784390
## icv           31.7309    2.4826  12.781 < 2e-16 ***
## ---
## Signif. codes:  0 '***' 0.001 '**' 0.01 '*' 0.05 '.' 0.1 ' ' 1
##
## Approximate significance of smooth terms:
##           edf Ref.df      F p-value
## s(bl_age)      2.874  2.874 50.297 <2e-16 ***
## s(bl_age):sleep_z 2.000  2.000  0.704  0.494
## s(bl_age):time  4.685  4.685 27.758 <2e-16 ***
## s(sleep_z):time  1.000  1.000  1.319  0.251
## ---
## Signif. codes:  0 '***' 0.001 '**' 0.01 '*' 0.05 '.' 0.1 ' ' 1
##
## R-sq.(adj) =  0.141
## lmer.REML = 51433 Scale est. = 821.32    n = 4626

```

Below are plots of a plot of  $s(\text{bl\_age})$ ,  $s(\text{bl\_age}):\text{sleep\_z}$ ,  $s(\text{bl\_age}):\text{time}$ , and  $s(\text{sleep\_z}):\text{time}$ . For  $s(\text{sleep\_z}):\text{time}$ , roughly, if we cannot fit a straight line through the confidence bands, there is evidence that the effect of time depends on sleep duration. It is correct that the confidence interval is zero at one point along the axis; this happens because we do not include the main effect.

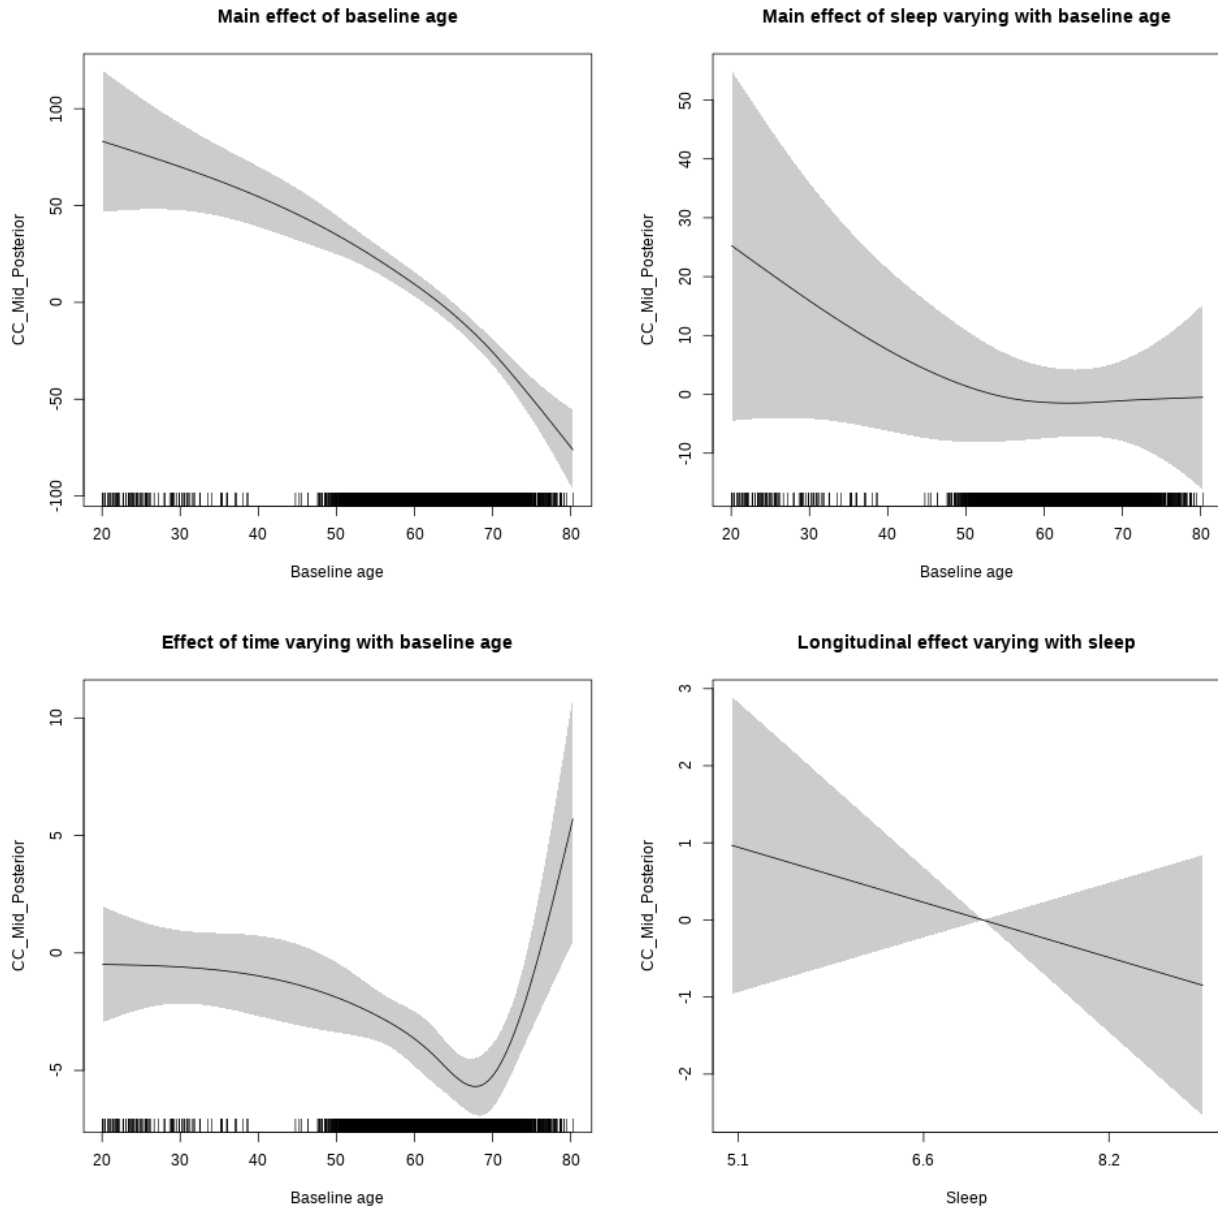

**Restricted to sleep  $\geq 5$  and  $\leq 9$  hours** Below is the row for `s(sleep_z):time` from the model output.

```
## s(sleep_z):time  1.000  1.000  1.009  0.315
```

Below are plots of a plot of `s(bl_age)`, `s(bl_age):sleep_z`, `s(bl_age):time`, and `s(sleep_z):time`. For `s(sleep_z):time`, roughly, if we cannot fit a straight line through the confidence bands, there is evidence that the effect of time depends on sleep duration. It is correct that the confidence interval is zero at one point along the axis; this happens because we do not include the main effect.





## Controlling for BMI

**Full data** Below is the model output. The term `s(sleep_z):time` is probably what we care most about.

```
##
## Family: gaussian
## Link function: identity
##
## Formula:
## value ~ sex + site + bmi + icv + s(bl_age, k = 10, bs = "cr") +
##   s(bl_age, by = sleep_z, bs = "cr") + +s(bl_age, by = time,
##   k = 5, bs = "cr") + s(sleep_z, by = time, k = 5, bs = "cr",
##   pc = 0)
```

```

## <environment: 0x5639112f1120>
##
## Parametric coefficients:
##           Estimate Std. Error t value Pr(>|t|)
## (Intercept)  499.6173    16.2194  30.804 < 2e-16 ***
## sexmale      -20.1870     4.6125  -4.377 1.23e-05 ***
## siteousPrisma  57.6551    22.7232   2.537 0.011200 *
## siteousSkyra  -6.1750     7.2402  -0.853 0.393772
## siteUCAM      38.4410    12.1840   3.155 0.001614 **
## siteUKB       98.5972    11.3445   8.691 < 2e-16 ***
## siteUmU       71.0525    14.0517   5.056 4.41e-07 ***
## bmi          -1.5974     0.4809  -3.321 0.000901 ***
## icv           30.5484     2.2670  13.475 < 2e-16 ***
## ---
## Signif. codes:  0 '***' 0.001 '**' 0.01 '*' 0.05 '.' 0.1 ' ' 1
##
## Approximate significance of smooth terms:
##           edf Ref.df      F p-value
## s(bl_age)      2.501  2.501 101.546 <2e-16 ***
## s(bl_age):sleep_z 2.000  2.000   1.376   0.253
## s(bl_age):time  4.784  4.784  26.405 <2e-16 ***
## s(sleep_z):time  1.000  1.000   0.224   0.636
## ---
## Signif. codes:  0 '***' 0.001 '**' 0.01 '*' 0.05 '.' 0.1 ' ' 1
##
## R-sq.(adj) =  0.17
## lmer.REML = 59778  Scale est. = 786.39    n = 5388

```

Below are plots of a plot of `s(bl_age)`, `s(bl_age):sleep_z`, `s(bl_age):time`, and `s(sleep_z):time`. For `s(sleep_z):time`, roughly, if we cannot fit a straight line through the confidence bands, there is evidence that the effect of time depends on sleep duration. It is correct that the confidence interval is zero at one point along the axis; this happens because we do not include the main effect.

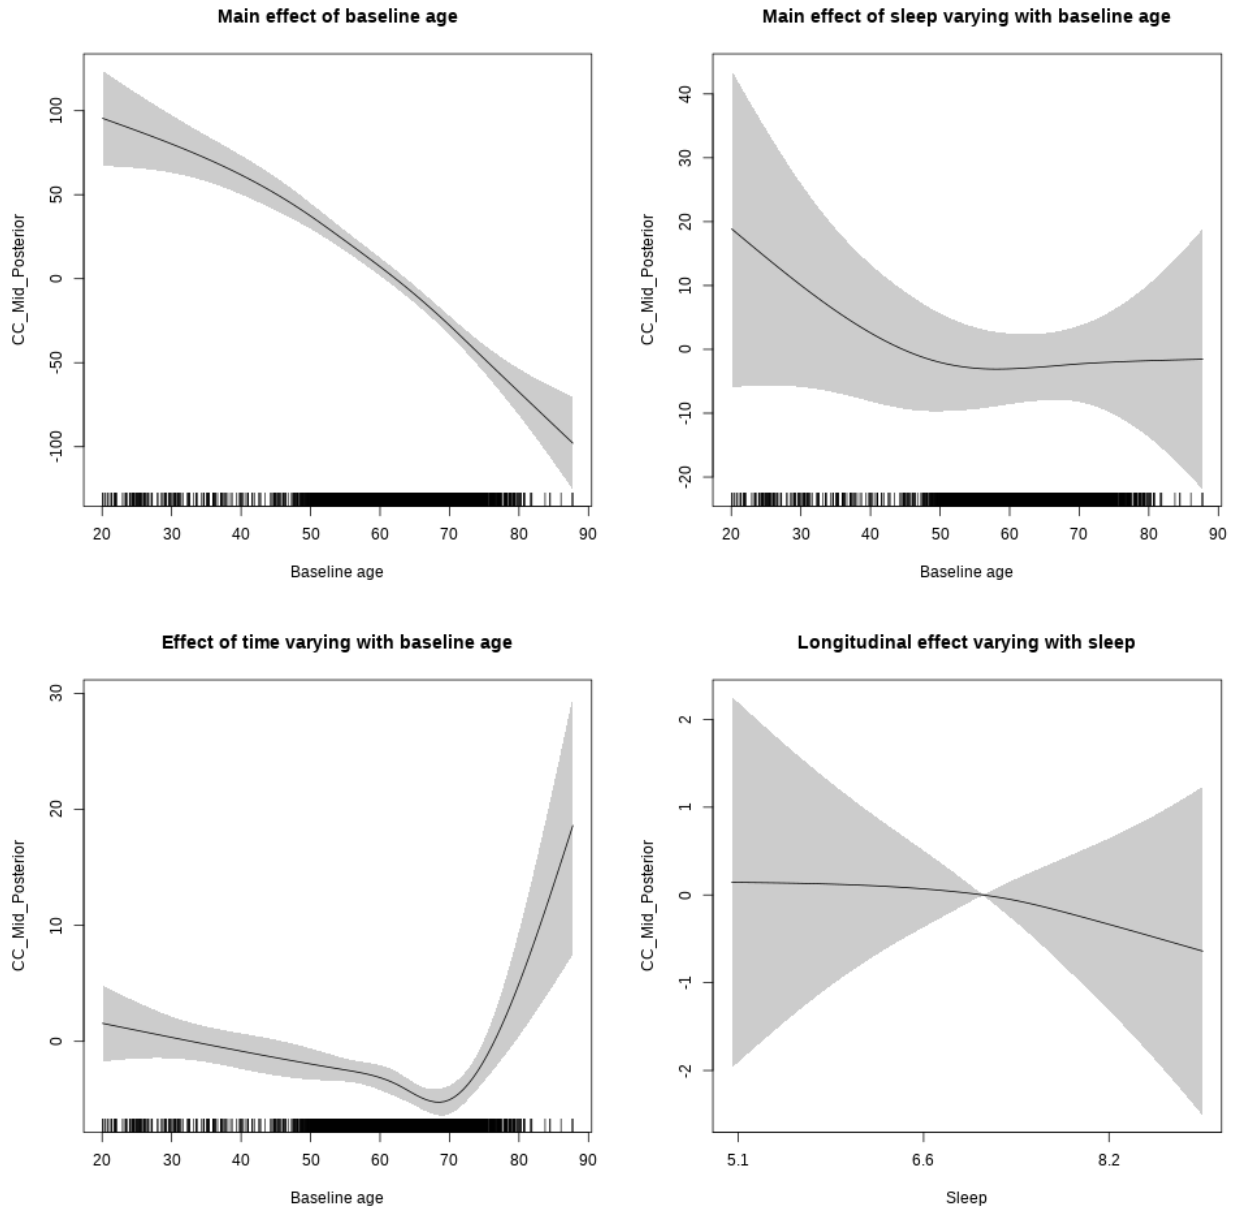

**Restricted to sleep  $\geq 5$  and  $\leq 9$  hours** Below is the row for `s(sleep_z):time` from the model output.

```
## s(sleep_z):time  1.199  1.199  0.128  0.702
```

Below are plots of a plot of `s(bl_age)`, `s(bl_age):sleep_z`, `s(bl_age):time`, and `s(sleep_z):time`. For `s(sleep_z):time`, roughly, if we cannot fit a straight line through the confidence bands, there is evidence that the effect of time depends on sleep duration. It is correct that the confidence interval is zero at one point along the axis; this happens because we do not include the main effect.



## Controlling for depression

**Full data** Below is the model output. The term `s(sleep_z):time` is probably what we care most about.

```
##
## Family: gaussian
## Link function: identity
##
## Formula:
## value ~ sex + site + depression + icv + s(bl_age, k = 10, bs = "cr") +
##       s(bl_age, by = sleep_z, bs = "cr") + +s(bl_age, by = time,
##       k = 5, bs = "cr") + s(sleep_z, by = time, k = 5, bs = "cr",
##       pc = 0)
```

```

## <environment: 0x5639159473f8>
##
## Parametric coefficients:
##           Estimate Std. Error t value Pr(>|t|)
## (Intercept)   539.563      8.673  62.215 < 2e-16 ***
## sexmale       -18.902      4.542  -4.161 3.21e-05 ***
## siteousAvanto -58.042     18.265  -3.178 0.00149 **
## siteousPrisma -12.774     31.373  -0.407 0.68390
## siteousSkyra  -85.673     15.737  -5.444 5.43e-08 ***
## siteUCAM      -43.444     10.380  -4.185 2.89e-05 ***
## siteUKB       14.498      7.965   1.820 0.06878 .
## siteUmU       -9.861     12.733  -0.774 0.43868
## depression    -11.417     15.962  -0.715 0.47448
## icv           27.347      2.183  12.528 < 2e-16 ***
## ---
## Signif. codes:  0 '***' 0.001 '**' 0.01 '*' 0.05 '.' 0.1 ' ' 1
##
## Approximate significance of smooth terms:
##           edf Ref.df      F p-value
## s(bl_age)      2.687  2.687 83.438 <2e-16 ***
## s(bl_age):sleep_z 2.000  2.000  0.868  0.420
## s(bl_age):time  4.588  4.588 29.142 <2e-16 ***
## s(sleep_z):time  1.000  1.000  0.362  0.547
## ---
## Signif. codes:  0 '***' 0.001 '**' 0.01 '*' 0.05 '.' 0.1 ' ' 1
##
## R-sq.(adj) =  0.156
## lmer.REML = 62780 Scale est. = 773.82    n = 5655

```

Below are plots of a plot of `s(bl_age)`, `s(bl_age):sleep_z`, `s(bl_age):time`, and `s(sleep_z):time`. For `s(sleep_z):time`, roughly, if we cannot fit a straight line through the confidence bands, there is evidence that the effect of time depends on sleep duration. It is correct that the confidence interval is zero at one point along the axis; this happens because we do not include the main effect.

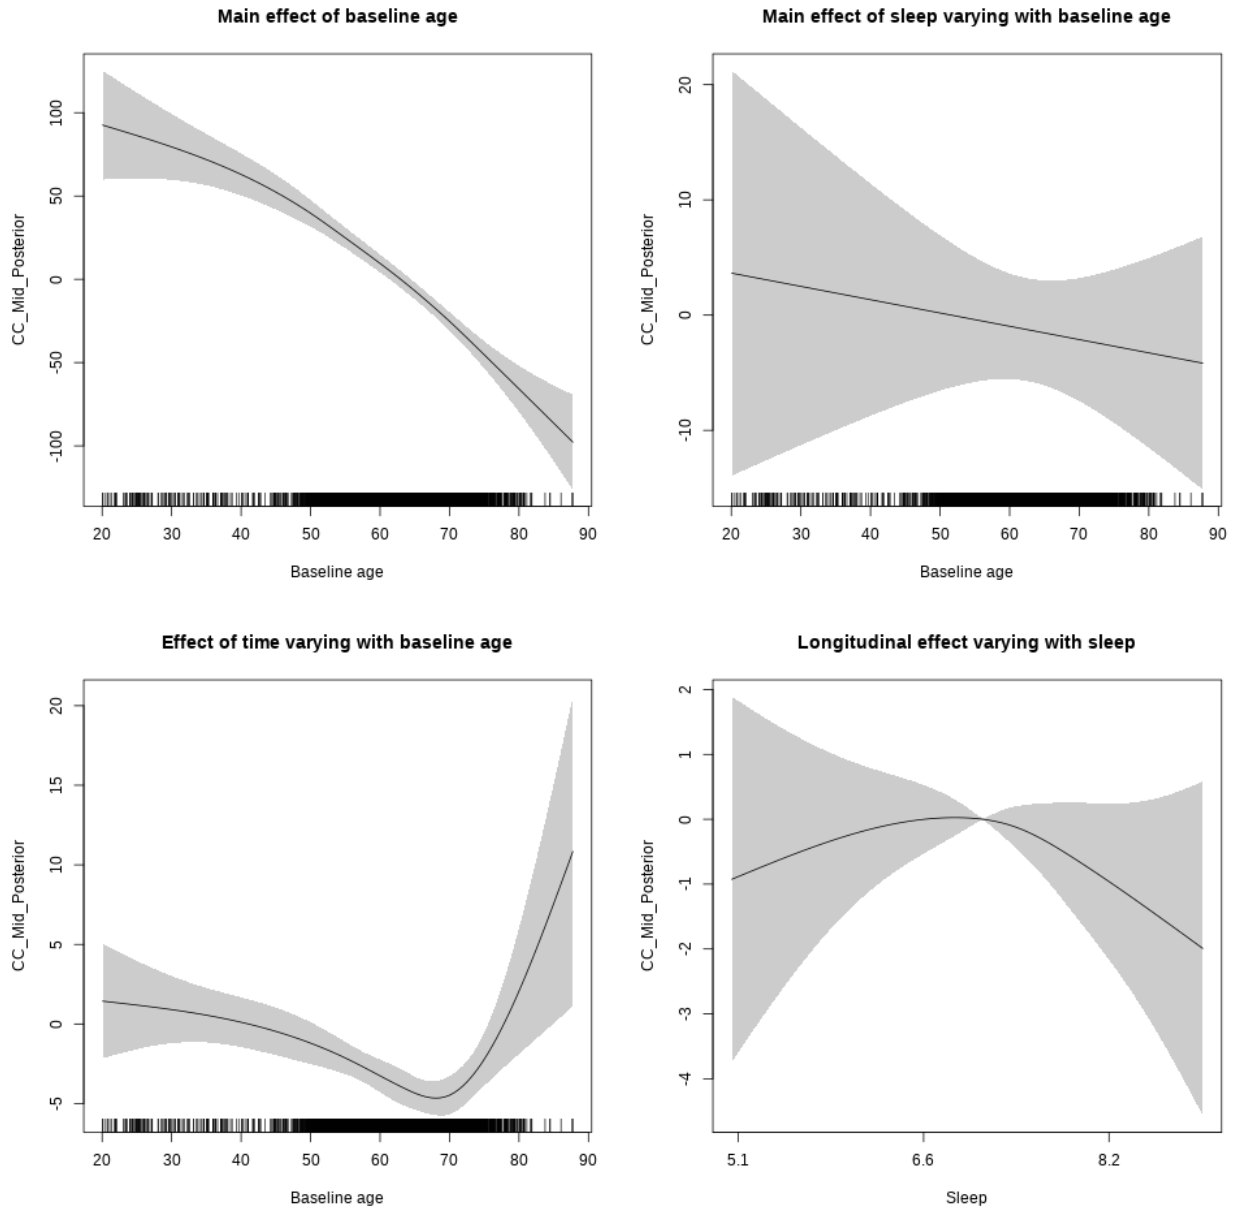

**Restricted to sleep  $\geq 5$  and  $\leq 9$  hours** Below is the row for `s(sleep_z):time` from the model output.

```
## s(sleep_z):time  1.840  1.840  1.114  0.235
```

Below are plots of a plot of `s(bl_age)`, `s(bl_age):sleep_z`, `s(bl_age):time`, and `s(sleep_z):time`. For `s(sleep_z):time`, roughly, if we cannot fit a straight line through the confidence bands, there is evidence that the effect of time depends on sleep duration. It is correct that the confidence interval is zero at one point along the axis; this happens because we do not include the main effect.



### Controlling for sleep quality

**Full data** Below is the model output. The term `s(sleep_z):time` is probably what we care most about.

```
##
## Family: gaussian
## Link function: identity
##
## Formula:
## value ~ X + s(bl_age, k = 10, bs = "cr") + s(bl_age, by = sleep_z,
##       bs = "cr") + s(bl_age, by = time, k = 5, bs = "cr") + s(sleep_z,
##       by = time, k = 5, bs = "cr", pc = 0)
## <environment: 0x563910f8bb18>
```

```

##
## Parametric coefficients:
##               Estimate Std. Error t value Pr(>|t|)
## (Intercept)    489.8766   12.5975  38.887 < 2e-16 ***
## Xsexmale       18.5635    4.7194   3.933 8.51e-05 ***
## XsiteousAvanto -22.1210   12.0377  -1.838 0.06618 .
## XsiteousPrisma  49.0018   23.7239   2.066 0.03894 *
## XsiteousSkyra  -47.6088   12.0832  -3.940 8.28e-05 ***
## XsiteUB        -21.8010   19.1308  -1.140 0.25453
## XsiteUCAM      -3.8704   12.3002  -0.315 0.75303
## XsiteUKB       -20.6948   38.3934  -0.539 0.58990
## XsiteUmU        9.9853   13.7160   0.728 0.46665
## Xukb_dummy:sleep_accel  8.9601    2.9701   3.017 0.00257 **
## Xukb_dummy:chronotype  0.8177    3.9600   0.206 0.83642
## Xukb_dummy:dozing    9.0564    8.1680   1.109 0.26760
## Xukb_dummy:sleeplessness -6.2274    5.0921  -1.223 0.22141
## Xukb_dummy:snoring   12.2063    7.2147   1.692 0.09074 .
## Xukb_dummy:gettingup  -0.6289    5.5342  -0.114 0.90953
## Xnotukb_dummy:PSQI_Global  0.1219    1.5599   0.078 0.93770
## ---
## Signif. codes:  0 '***' 0.001 '**' 0.01 '*' 0.05 '.' 0.1 ' ' 1
##
## Approximate significance of smooth terms:
##               edf Ref.df    F p-value
## s(bl_age)      2.852  2.852 84.132 <2e-16 ***
## s(bl_age):sleep_z 2.000  2.000  1.462  0.2319
## s(bl_age):time  2.000  2.000 71.900 <2e-16 ***
## s(sleep_z):time  1.000  1.000  4.234  0.0397 *
## ---
## Signif. codes:  0 '***' 0.001 '**' 0.01 '*' 0.05 '.' 0.1 ' ' 1
##
## R-sq.(adj) =  0.193
## lmer.REML = 46848 Scale est. = 715.83    n = 4278

```

Below are plots of a plot of  $s(\text{bl\_age})$ ,  $s(\text{bl\_age}):\text{sleep\_z}$ ,  $s(\text{bl\_age}):\text{time}$ , and  $s(\text{sleep\_z}):\text{time}$ . For  $s(\text{sleep\_z}):\text{time}$ , roughly, if we cannot fit a straight line through the confidence bands, there is evidence that the effect of time depends on sleep duration. It is correct that that confidence interval is zero at one point along the axis; this happens because we do not include the main effect.



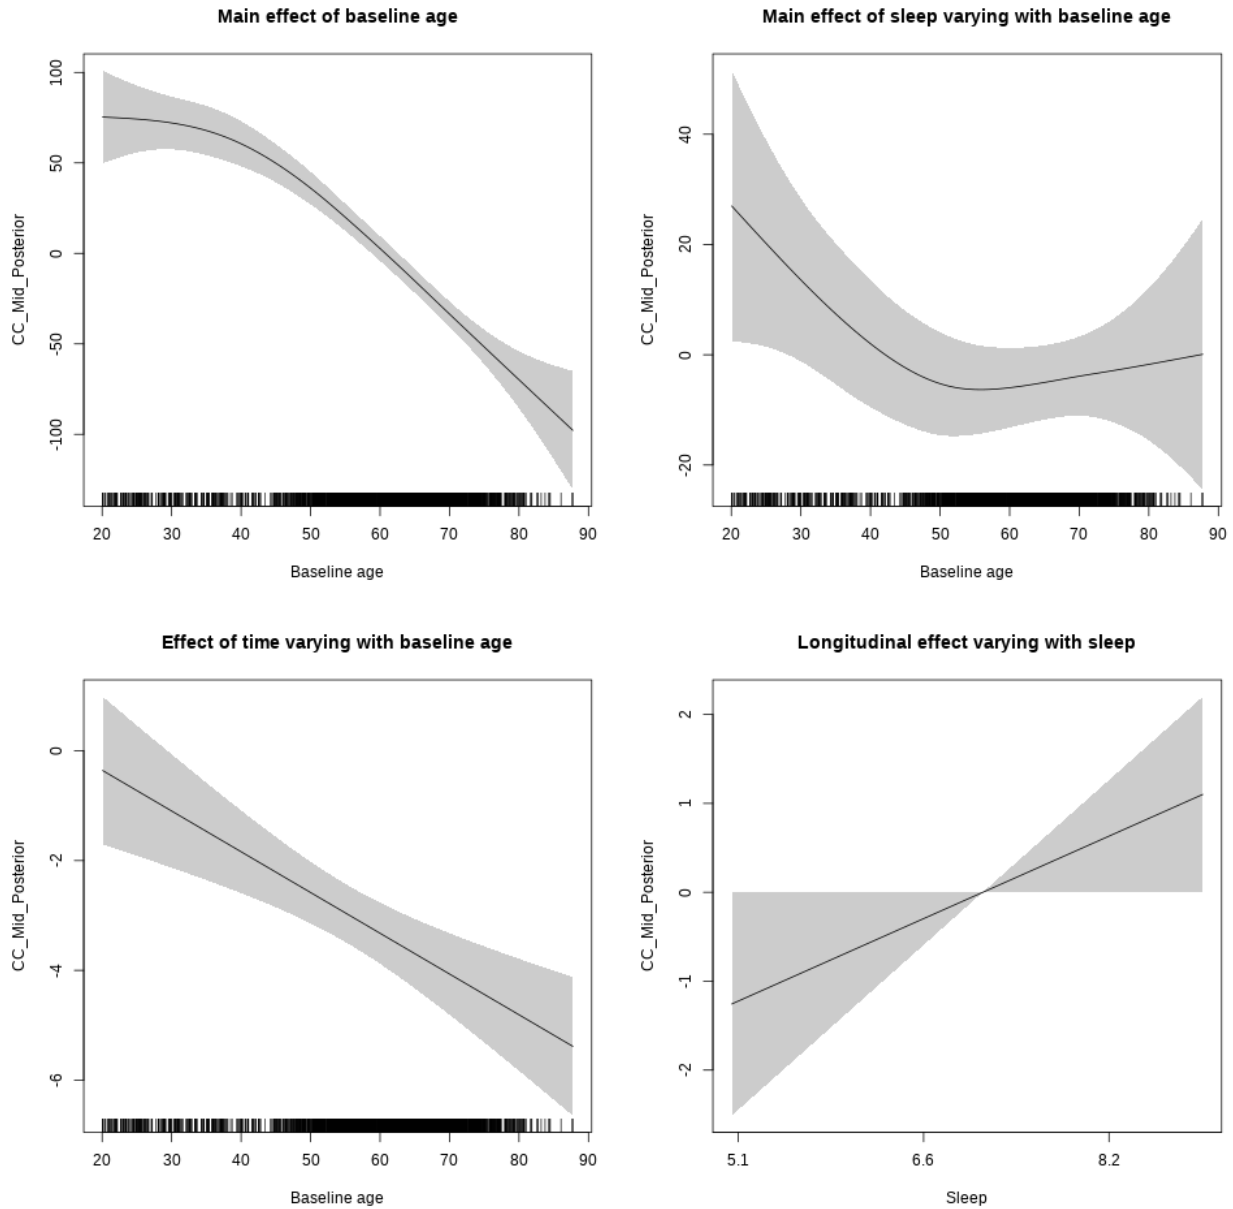

**Restricted to sleep  $\geq 5$  and  $\leq 9$  hours** Below is the row for `s(sleep_z):time` from the model output.

```
## s(sleep_z):time 1.000 1.000 4.007 0.0454 *
```

Below are plots of a plot of `s(bl_age)`, `s(bl_age):sleep_z`, `s(bl_age):time`, and `s(sleep_z):time`. For `s(sleep_z):time`, roughly, if we cannot fit a straight line through the confidence bands, there is evidence that the effect of time depends on sleep duration. It is correct that the confidence interval is zero at one point along the axis; this happens because we do not include the main effect.

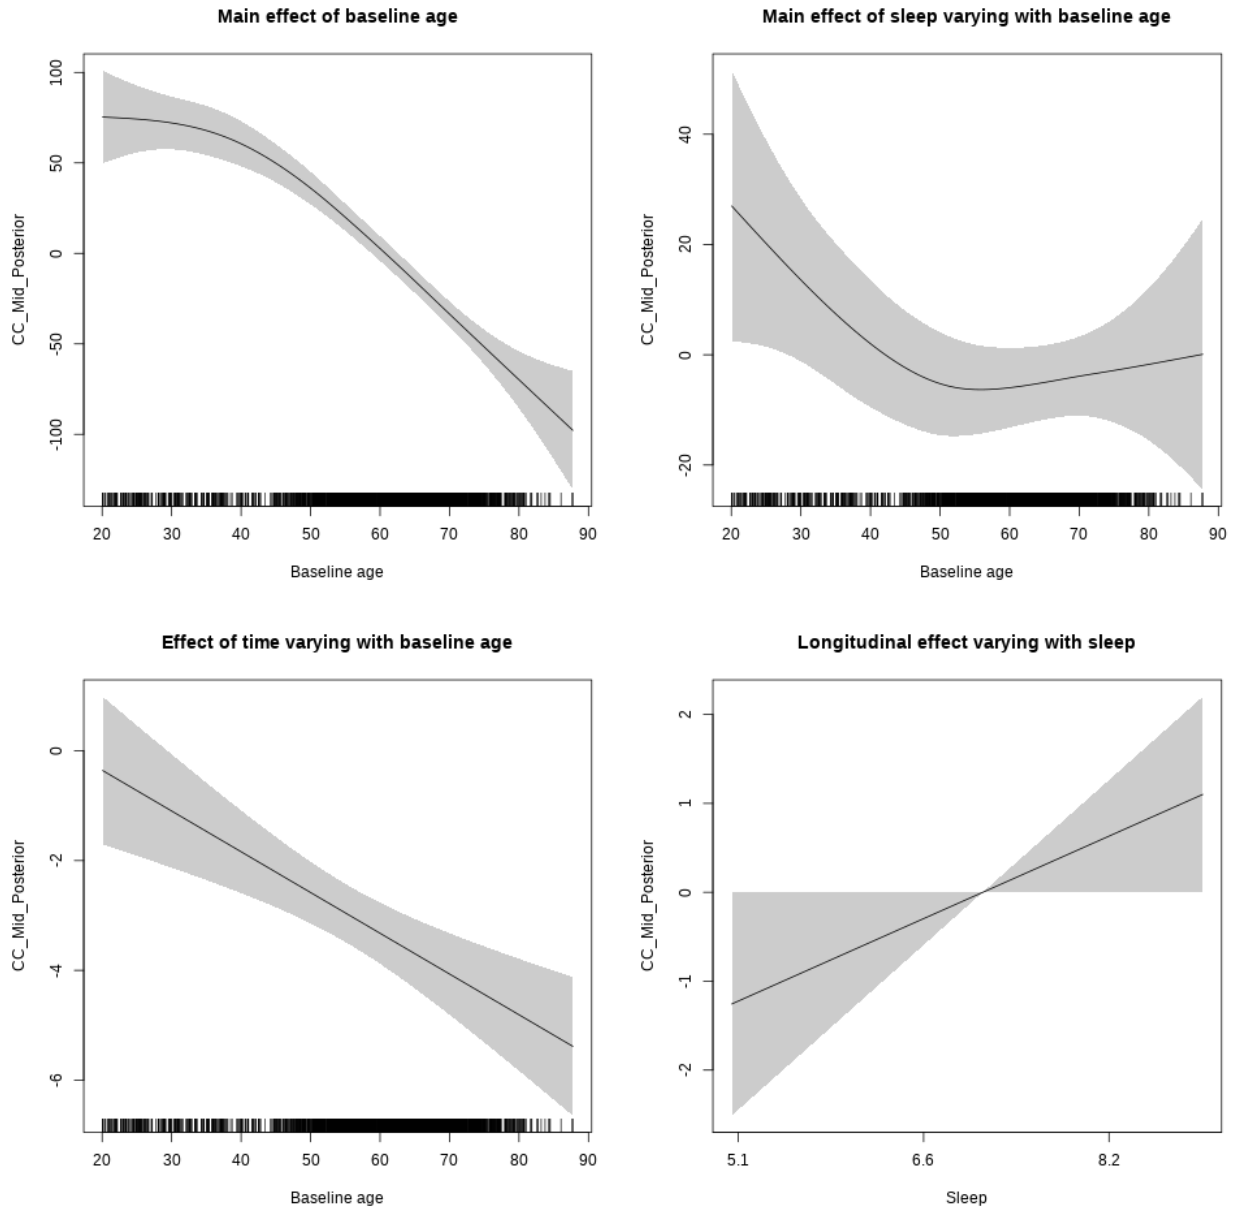

## CC\_Posterior

### Main analysis

**Full data** Below is the model output. The term `s(sleep_z):time` is probably what we care most about.

```
##
## Family: gaussian
## Link function: identity
##
## Formula:
## value ~ sex + site + icv + s(bl_age, k = 10, bs = "cr") + s(bl_age,
##   by = sleep_z, bs = "cr") + +s(bl_age, by = time, k = 5, bs = "cr") +
```

```

##      s(sleep_z, by = time, k = 5, bs = "cr", pc = 0)
## <environment: 0x56391e8b18b8>
##
## Parametric coefficients:
##              Estimate Std. Error t value Pr(>|t|)
## (Intercept)  1066.718    10.725   99.460 < 2e-16 ***
## sexmale      -33.472     5.595  -5.983 2.29e-09 ***
## siteousAvanto -95.527    13.286  -7.190 7.04e-13 ***
## siteousPrisma -101.803    28.703  -3.547 0.000392 ***
## siteousSkyra  -81.073    12.929  -6.271 3.78e-10 ***
## siteUB       -84.105    25.343  -3.319 0.000908 ***
## siteUCAM     -66.165    13.527  -4.891 1.02e-06 ***
## siteUKB      -1.886    10.044  -0.188 0.851090
## siteUmU     -14.624    15.653  -0.934 0.350226
## icv          65.278     2.626  24.862 < 2e-16 ***
## ---
## Signif. codes:  0 '***' 0.001 '**' 0.01 '*' 0.05 '.' 0.1 ' ' 1
##
## Approximate significance of smooth terms:
##              edf Ref.df      F p-value
## s(bl_age)      1     1  7.734 0.00543 **
## s(bl_age):sleep_z  2     2  0.362 0.69643
## s(bl_age):time    2     2 31.778 < 2e-16 ***
## s(sleep_z):time   1     1  2.723 0.09896 .
## ---
## Signif. codes:  0 '***' 0.001 '**' 0.01 '*' 0.05 '.' 0.1 ' ' 1
##
## R-sq.(adj) =  0.167
## lmer.REML = 93848  Scale est. = 1077.4    n = 8100

```

Below are plots of a plot of  $s(\text{bl\_age})$ ,  $s(\text{bl\_age}):\text{sleep\_z}$ ,  $s(\text{bl\_age}):\text{time}$ , and  $s(\text{sleep\_z}):\text{time}$ . For  $s(\text{sleep\_z}):\text{time}$ , roughly, if we cannot fit a straight line through the confidence bands, there is evidence that the effect of time depends on sleep duration. It is correct that the confidence interval is zero at one point along the axis; this happens because we do not include the main effect.

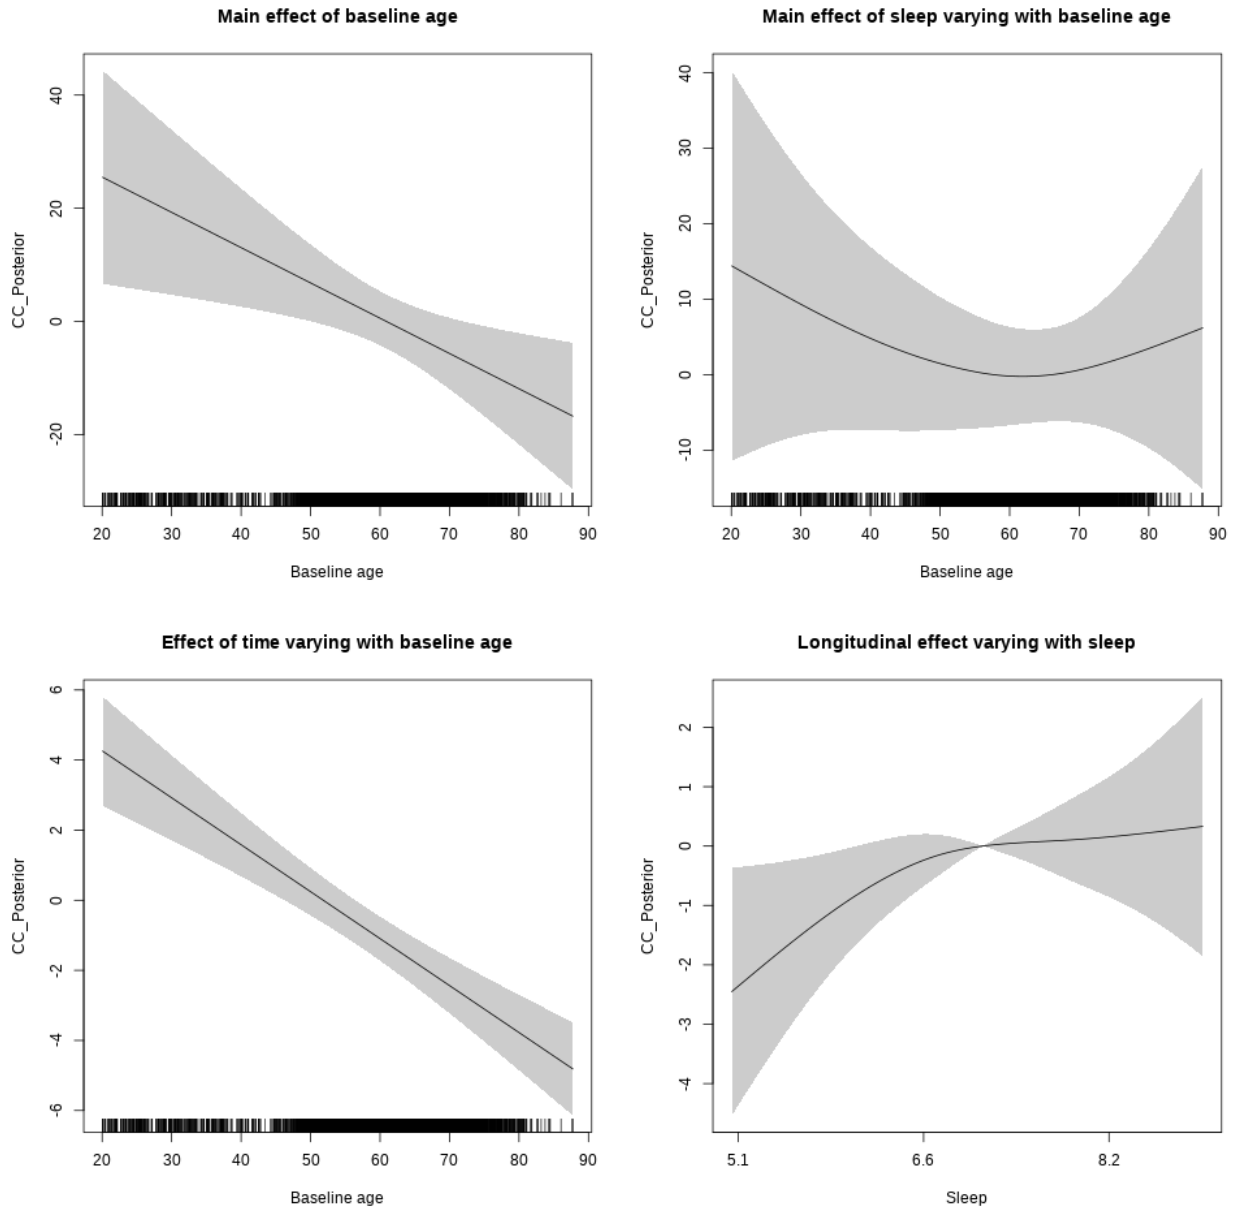

**Restricted to sleep  $\geq 5$  and  $\leq 9$  hours** Below is the row for `s(sleep_z):time` from the model output.

```
## s(sleep_z):time  1.810  1.810  2.953 0.06042 .
```

Below are plots of a plot of `s(bl_age)`, `s(bl_age):sleep_z`, `s(bl_age):time`, and `s(sleep_z):time`. For `s(sleep_z):time`, roughly, if we cannot fit a straight line through the confidence bands, there is evidence that the effect of time depends on sleep duration. It is correct that the confidence interval is zero at one point along the axis; this happens because we do not include the main effect.

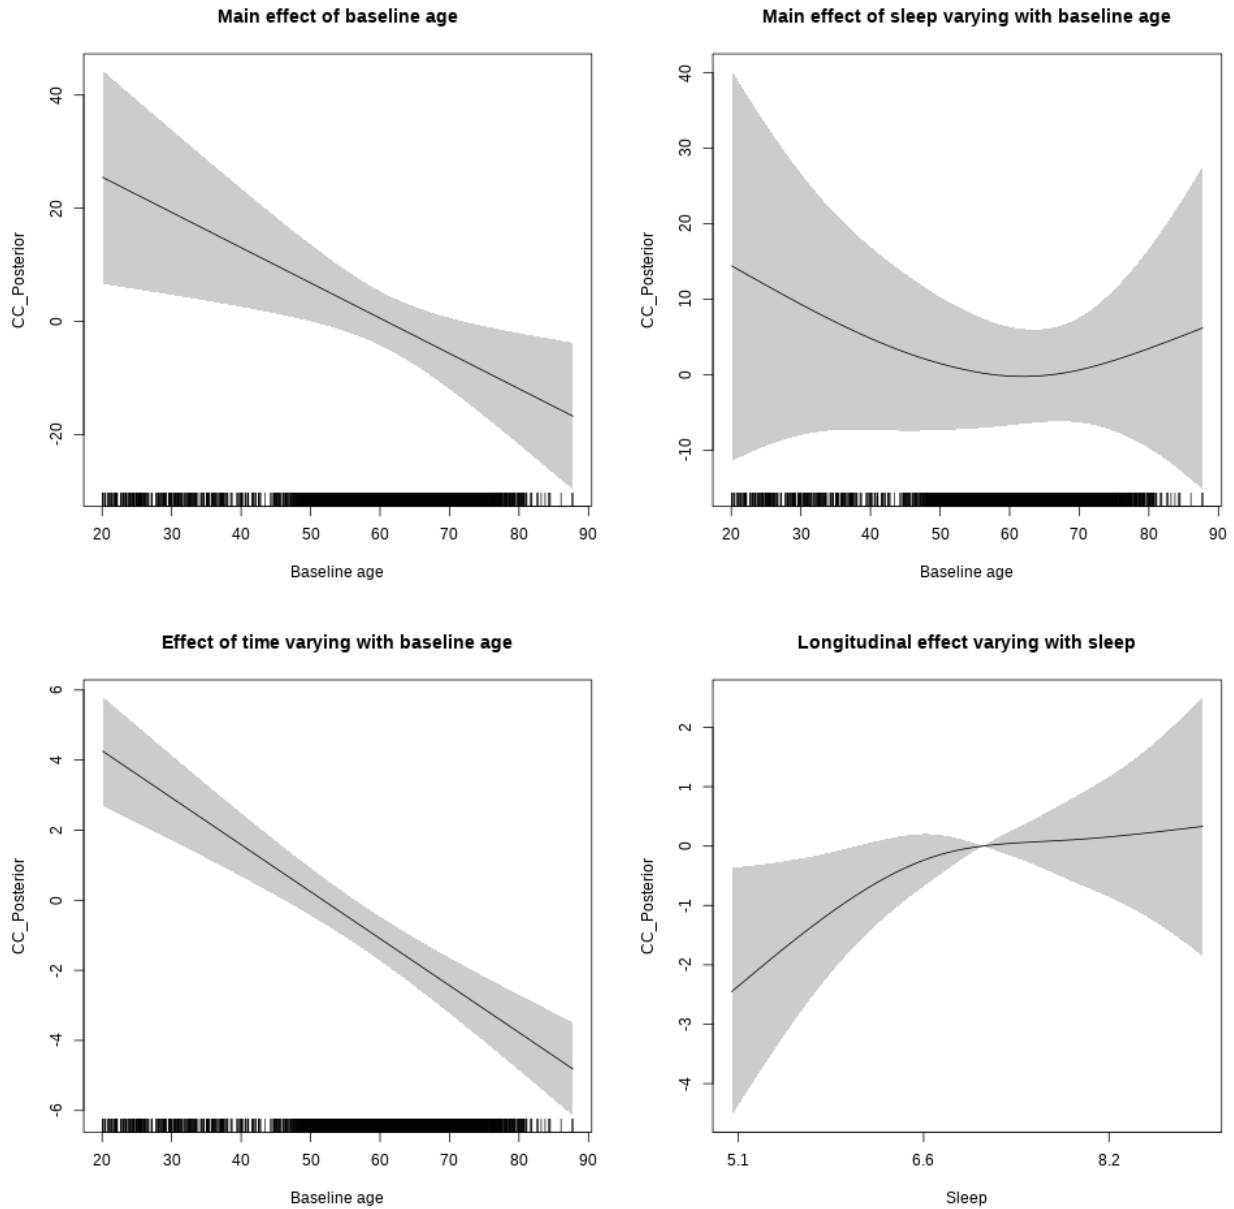

## Controlling for socioeconomic status

**Full data** Below is the model output. The term `s(sleep_z):time` is probably what we care most about.

```
##
## Family: gaussian
## Link function: identity
##
## Formula:
## value ~ sex + site + income_scaled + education_scaled + icv +
##       s(bl_age, k = 10, bs = "cr") + s(bl_age, by = sleep_z, bs = "cr") +
##       +s(bl_age, by = time, k = 5, bs = "cr") + s(sleep_z, by = time,
##       k = 5, bs = "cr", pc = 0)
```

```

## <environment: 0x56391152c058>
##
## Parametric coefficients:
##           Estimate Std. Error t value Pr(>|t|)
## (Intercept)  1109.758    25.376  43.733 < 2e-16 ***
## sexmale      -50.304     7.087  -7.098 1.46e-12 ***
## siteousAvanto -127.404    27.537  -4.627 3.82e-06 ***
## siteousPrisma -141.671    49.920  -2.838 0.00456 **
## siteousSkyra  -109.322    26.172  -4.177 3.01e-05 ***
## siteUKB      -39.090    23.920  -1.634 0.10228
## income_scaled -13.112     8.735  -1.501 0.13341
## education_scaled  5.778    10.154  0.569 0.56939
## icv          76.809     3.448  22.279 < 2e-16 ***
## ---
## Signif. codes:  0 '***' 0.001 '**' 0.01 '*' 0.05 '.' 0.1 ' ' 1
##
## Approximate significance of smooth terms:
##           edf Ref.df      F p-value
## s(bl_age)      1.000  1.000  0.043  0.836
## s(bl_age):sleep_z 3.092  3.092  1.400  0.194
## s(bl_age):time  2.000  2.000 13.206 2.15e-06 ***
## s(sleep_z):time  1.000  1.000  0.708  0.400
## ---
## Signif. codes:  0 '***' 0.001 '**' 0.01 '*' 0.05 '.' 0.1 ' ' 1
##
## R-sq.(adj) =  0.177
## lmer.REML = 53779  Scale est. = 1185.4    n = 4618

```

Below are plots of a plot of `s(bl_age)`, `s(bl_age):sleep_z`, `s(bl_age):time`, and `s(sleep_z):time`. For `s(sleep_z):time`, roughly, if we cannot fit a straight line through the confidence bands, there is evidence that the effect of time depends on sleep duration. It is correct that the confidence interval is zero at one point along the axis; this happens because we do not include the main effect.

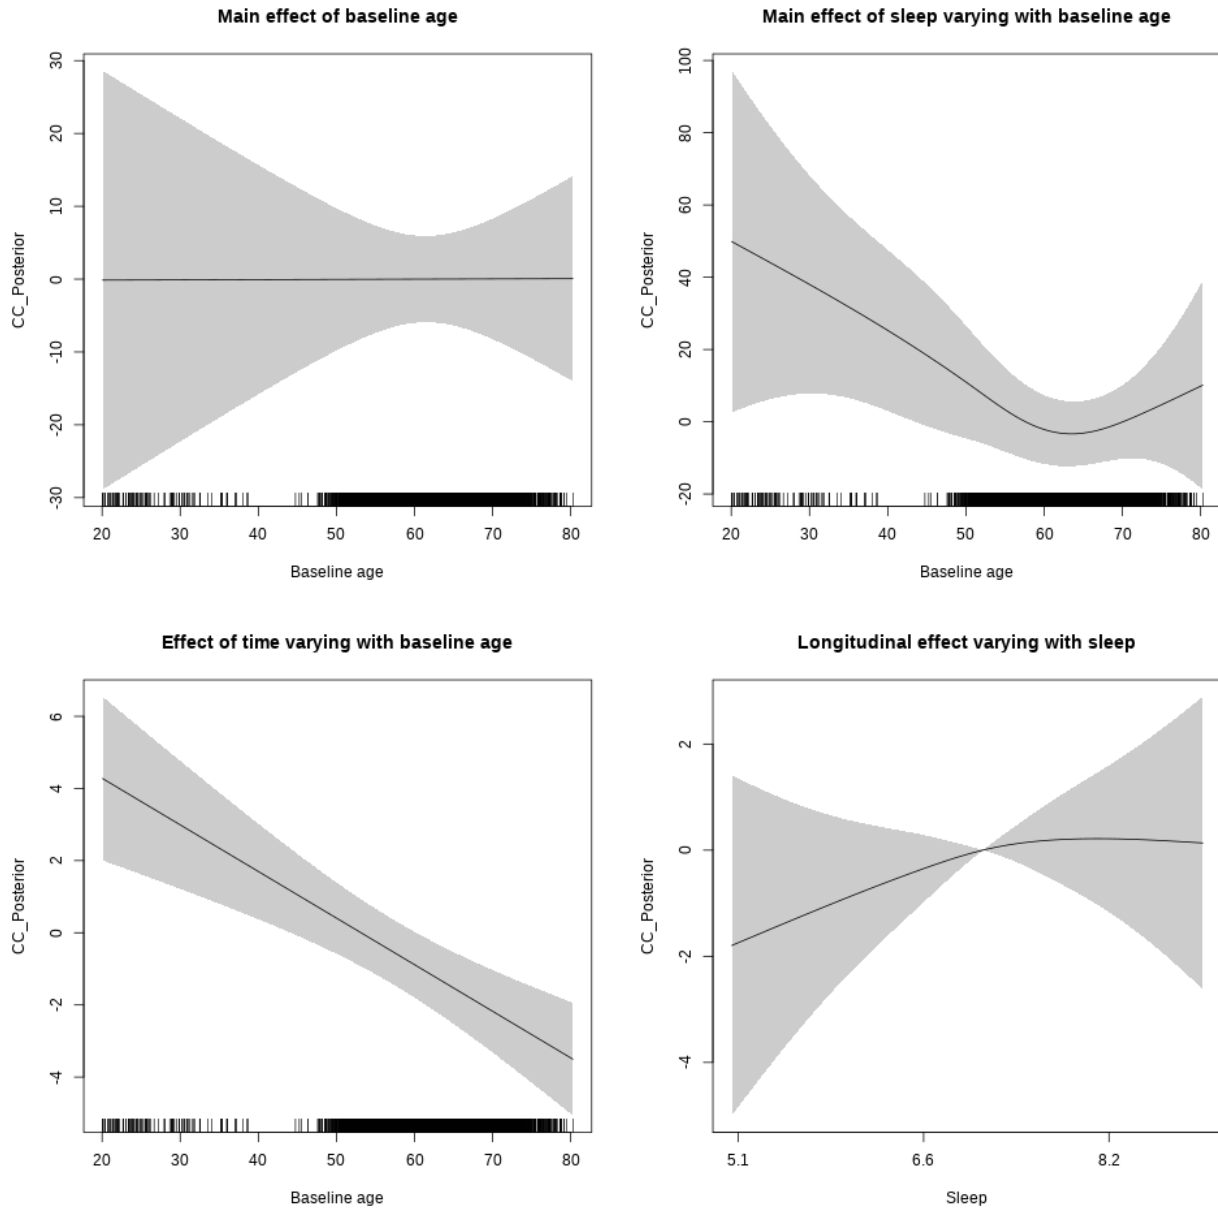

**Restricted to sleep  $\geq 5$  and  $\leq 9$  hours** Below is the row for `s(sleep_z):time` from the model output.

```
## s(sleep_z):time  1.344  1.344  1.171  0.440
```

Below are plots of a plot of `s(bl_age)`, `s(bl_age):sleep_z`, `s(bl_age):time`, and `s(sleep_z):time`. For `s(sleep_z):time`, roughly, if we cannot fit a straight line through the confidence bands, there is evidence that the effect of time depends on sleep duration. It is correct that the confidence interval is zero at one point along the axis; this happens because we do not include the main effect.



## Controlling for BMI

**Full data** Below is the model output. The term `s(sleep_z):time` is probably what we care most about.

```
##
## Family: gaussian
## Link function: identity
##
## Formula:
## value ~ sex + site + bmi + icv + s(bl_age, k = 10, bs = "cr") +
##   s(bl_age, by = sleep_z, bs = "cr") + +s(bl_age, by = time,
##     k = 5, bs = "cr") + s(sleep_z, by = time, k = 5, bs = "cr",
##     pc = 0)
```



```

## <environment: 0x56390d716a20>
##
## Parametric coefficients:
##           Estimate Std. Error t value Pr(>|t|)
## (Intercept) 1013.7167    21.8739  46.344 < 2e-16 ***
## sexmale     -39.2040     6.6064  -5.934 3.14e-09 ***
## siteousPrisma -14.7426    27.1087  -0.544 0.5866
## siteousSkyra  12.2445     8.6634   1.413 0.1576
## siteUCAM     36.4606    16.4621   2.215 0.0268 *
## siteUKB      92.9192    14.3513   6.475 1.04e-10 ***
## siteUmU      91.0937    18.9511   4.807 1.58e-06 ***
## bmi         -1.6126     0.6886  -2.342 0.0192 *
## icv          72.9317     3.1990  22.799 < 2e-16 ***
## ---
## Signif. codes:  0 '***' 0.001 '**' 0.01 '*' 0.05 '.' 0.1 ' ' 1
##
## Approximate significance of smooth terms:
##           edf Ref.df    F  p-value
## s(bl_age)      1.000  1.000  0.381  0.537
## s(bl_age):sleep_z 2.511  2.511  1.046  0.522
## s(bl_age):time  2.000  2.000 15.496 1.89e-07 ***
## s(sleep_z):time  1.000  1.000  2.390  0.122
## ---
## Signif. codes:  0 '***' 0.001 '**' 0.01 '*' 0.05 '.' 0.1 ' ' 1
##
## R-sq.(adj) = 0.168
## lmer.REML = 62452  Scale est. = 1107.9    n = 5372

```

Below are plots of a plot of `s(bl_age)`, `s(bl_age):sleep_z`, `s(bl_age):time`, and `s(sleep_z):time`. For `s(sleep_z):time`, roughly, if we cannot fit a straight line through the confidence bands, there is evidence that the effect of time depends on sleep duration. It is correct that the confidence interval is zero at one point along the axis; this happens because we do not include the main effect.

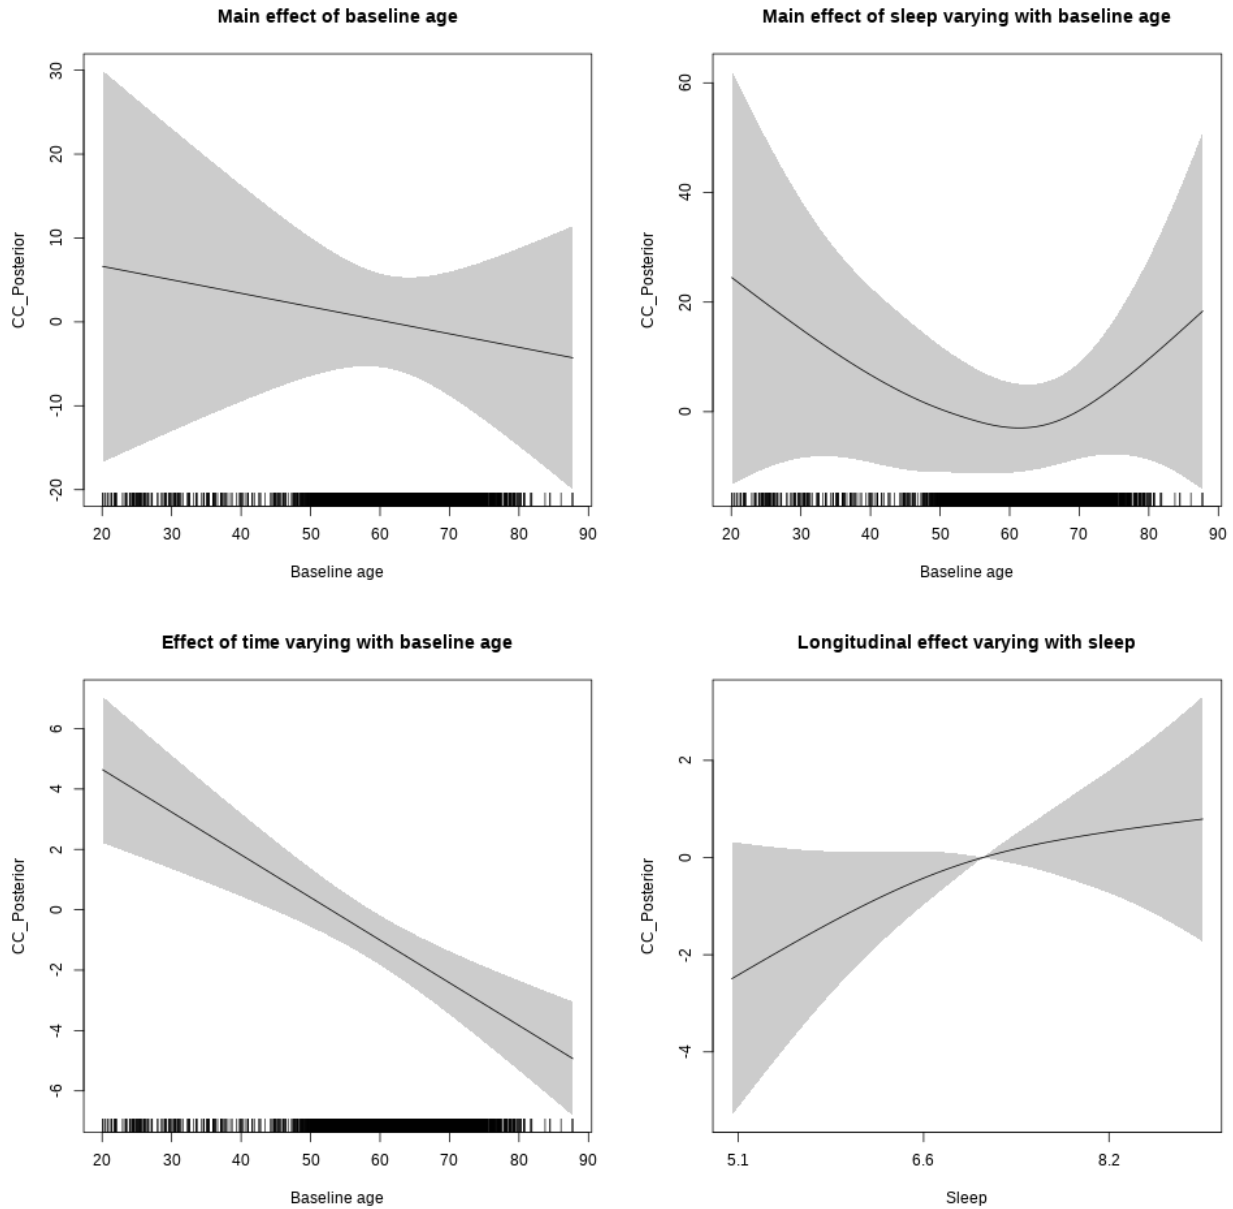

**Restricted to sleep  $\geq 5$  and  $\leq 9$  hours** Below is the row for `s(sleep_z):time` from the model output.

```
## s(sleep_z):time  1.358  1.358  2.815   0.155
```

Below are plots of a plot of `s(bl_age)`, `s(bl_age):sleep_z`, `s(bl_age):time`, and `s(sleep_z):time`. For `s(sleep_z):time`, roughly, if we cannot fit a straight line through the confidence bands, there is evidence that the effect of time depends on sleep duration. It is correct that the confidence interval is zero at one point along the axis; this happens because we do not include the main effect.



## Controlling for depression

**Full data** Below is the model output. The term `s(sleep_z):time` is probably what we care most about.

```
##
## Family: gaussian
## Link function: identity
##
## Formula:
## value ~ sex + site + depression + icv + s(bl_age, k = 10, bs = "cr") +
##   s(bl_age, by = sleep_z, bs = "cr") + +s(bl_age, by = time,
##     k = 5, bs = "cr") + s(sleep_z, by = time, k = 5, bs = "cr",
##     pc = 0)
```

```

## <environment: 0x5639111d2bd8>
##
## Parametric coefficients:
##           Estimate Std. Error t value Pr(>|t|)
## (Intercept) 1053.862    12.711  82.911 < 2e-16 ***
## sexmale     -34.266     6.676  -5.133 2.95e-07 ***
## siteousAvanto -75.012    24.940  -3.008 0.00264 **
## siteousPrisma -73.859    39.307  -1.879 0.06030 .
## siteousSkyra -50.827    22.164  -2.293 0.02187 *
## siteUCAM     -45.245    15.104  -2.996 0.00275 **
## siteUKB       8.813     11.598   0.760 0.44733
## siteUmU       8.814     18.860   0.467 0.64026
## depression  -10.843    23.579  -0.460 0.64564
## icv           66.226     3.153  21.005 < 2e-16 ***
## ---
## Signif. codes:  0 '***' 0.001 '**' 0.01 '*' 0.05 '.' 0.1 ' ' 1
##
## Approximate significance of smooth terms:
##           edf Ref.df      F  p-value
## s(bl_age)      1      1  0.150   0.699
## s(bl_age):sleep_z  2      2  0.678   0.508
## s(bl_age):time    2      2 12.592 3.92e-06 ***
## s(sleep_z):time    1      1  1.258   0.262
## ---
## Signif. codes:  0 '***' 0.001 '**' 0.01 '*' 0.05 '.' 0.1 ' ' 1
##
## R-sq.(adj) =  0.158
## lmer.REML = 65703  Scale est. = 1078.5    n = 5637

```

Below are plots of a plot of `s(bl_age)`, `s(bl_age):sleep_z`, `s(bl_age):time`, and `s(sleep_z):time`. For `s(sleep_z):time`, roughly, if we cannot fit a straight line through the confidence bands, there is evidence that the effect of time depends on sleep duration. It is correct that the confidence interval is zero at one point along the axis; this happens because we do not include the main effect.

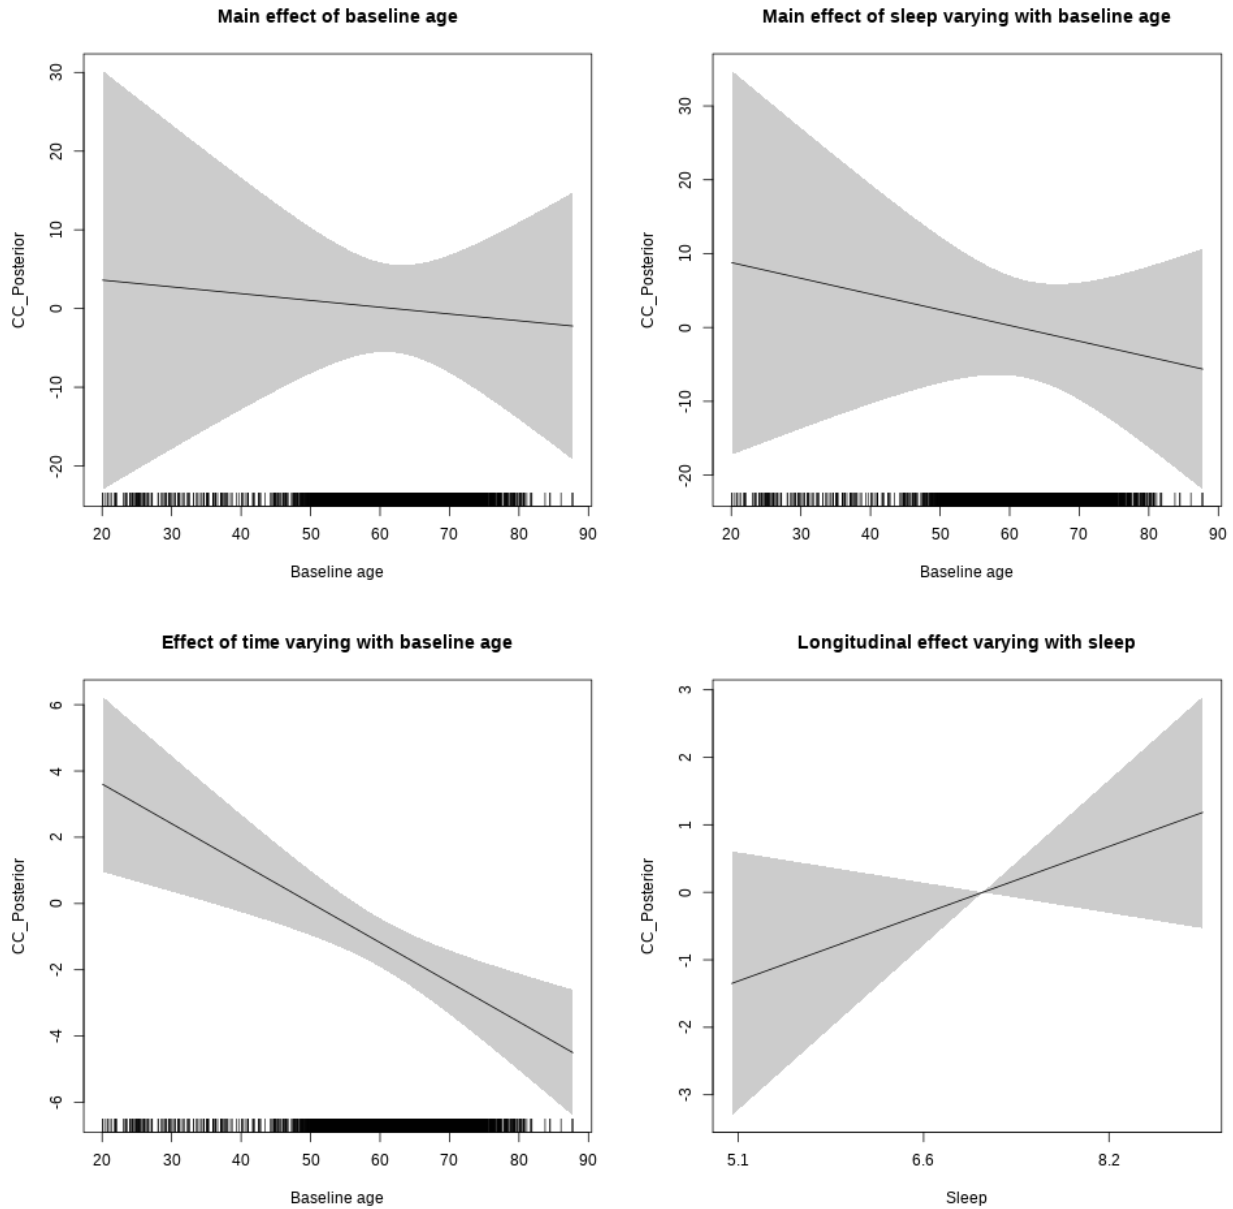

**Restricted to sleep  $\geq 5$  and  $\leq 9$  hours** Below is the row for `s(sleep_z):time` from the model output.

```
## s(sleep_z):time      1      1  1.903  0.168
```

Below are plots of a plot of `s(bl_age)`, `s(bl_age):sleep_z`, `s(bl_age):time`, and `s(sleep_z):time`. For `s(sleep_z):time`, roughly, if we cannot fit a straight line through the confidence bands, there is evidence that the effect of time depends on sleep duration. It is correct that the confidence interval is zero at one point along the axis; this happens because we do not include the main effect.



## Controlling for sleep quality

**Full data** Below is the model output. The term `s(sleep_z):time` is probably what we care most about.

```
##
## Family: gaussian
## Link function: identity
##
## Formula:
## value ~ X + s(bl_age, k = 10, bs = "cr") + s(bl_age, by = sleep_z,
##       bs = "cr") + s(bl_age, by = time, k = 5, bs = "cr") + s(sleep_z,
##       by = time, k = 5, bs = "cr", pc = 0)
## <environment: 0x563911573b28>
```

```

##
## Parametric coefficients:
##               Estimate Std. Error t value Pr(>|t|)
## (Intercept)      914.592    19.109  47.861 < 2e-16 ***
## Xsexmale          43.397     7.202   6.026 1.83e-09 ***
## XsiteousAvanto    44.940    18.219   2.467 0.013677 *
## XsiteousPrisma    70.428    29.478   2.389 0.016929 *
## XsiteousSkyra     36.002    18.261   1.971 0.048737 *
## XsiteUB            4.047    29.114   0.139 0.889452
## XsiteUCAM         53.475    18.507   2.889 0.003879 **
## XsiteUKB          -73.213    58.114  -1.260 0.207807
## XsiteUmU          66.190    20.695   3.198 0.001392 **
## Xukb_dummy:sleep_accel 15.549     4.523   3.438 0.000593 ***
## Xukb_dummy:chronotype  9.648     6.041   1.597 0.110367
## Xukb_dummy:dozing    9.642    12.440   0.775 0.438353
## Xukb_dummy:sleeplessness 2.217     7.725   0.287 0.774084
## Xukb_dummy:snoring   6.672    10.991   0.607 0.543834
## Xukb_dummy:gettingup 11.762     8.378   1.404 0.160457
## Xnotukb_dummy:PSQI_Global 1.613     2.379   0.678 0.497744
## ---
## Signif. codes:  0 '***' 0.001 '**' 0.01 '*' 0.05 '.' 0.1 ' ' 1
##
## Approximate significance of smooth terms:
##               edf Ref.df    F p-value
## s(bl_age)      1.000  1.000  7.159 0.00749 **
## s(bl_age):sleep_z 2.745  2.745  0.623 0.61359
## s(bl_age):time  2.000  2.000 33.512 < 2e-16 ***
## s(sleep_z):time 1.000  1.000  2.010 0.15634
## ---
## Signif. codes:  0 '***' 0.001 '**' 0.01 '*' 0.05 '.' 0.1 ' ' 1
##
## R-sq.(adj) =  0.0717
## lmer.REML = 48811  Scale est. = 908.09    n = 4258

```

Below are plots of a plot of `s(bl_age)`, `s(bl_age):sleep_z`, `s(bl_age):time`, and `s(sleep_z):time`. For `s(sleep_z):time`, roughly, if we cannot fit a straight line through the confidence bands, there is evidence that the effect of time depends on sleep duration. It is correct that that confidence interval is zero at one point along the axis; this happens because we do not include the main effect.

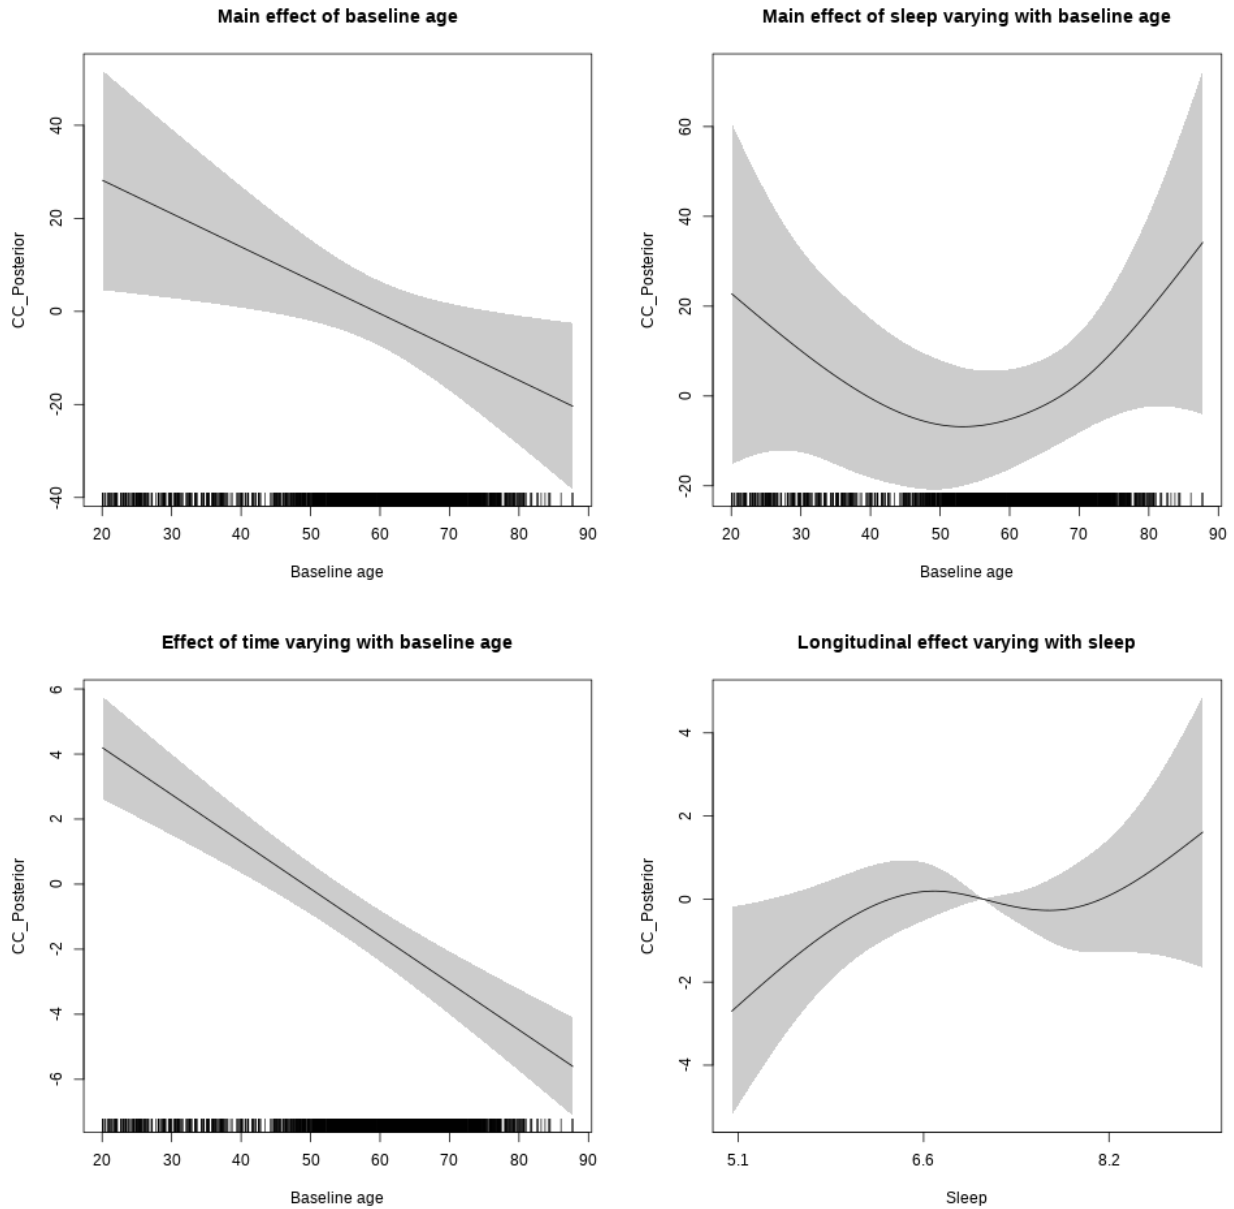

**Restricted to sleep  $\geq 5$  and  $\leq 9$  hours** Below is the row for `s(sleep_z):time` from the model output.

```
## s(sleep_z):time  2.554  2.554  1.156  0.1942
```

Below are plots of a plot of `s(bl_age)`, `s(bl_age):sleep_z`, `s(bl_age):time`, and `s(sleep_z):time`. For `s(sleep_z):time`, roughly, if we cannot fit a straight line through the confidence bands, there is evidence that the effect of time depends on sleep duration. It is correct that the confidence interval is zero at one point along the axis; this happens because we do not include the main effect.





## Cerebellum-Cortex

### Main analysis

**Full data** Below is the model output. The term `s(sleep_z):time` is probably what we care most about.

```
##
## Family: gaussian
## Link function: identity
##
## Formula:
## value ~ sex + site + icv + s(bl_age, k = 10, bs = "cr") + s(bl_age,
##   by = sleep_z, bs = "cr") + +s(bl_age, by = time, k = 5, bs = "cr") +
```

```

##      s(sleep_z, by = time, k = 5, bs = "cr", pc = 0)
## <environment: 0x56391e79b038>
##
## Parametric coefficients:
##              Estimate Std. Error t value Pr(>|t|)
## (Intercept)  108107.6      681.0 158.742 < 2e-16 ***
## sexmale      5093.1       350.8  14.519 < 2e-16 ***
## siteousAvanto -8330.3      835.0  -9.977 < 2e-16 ***
## siteousPrisma -7046.9     1750.2  -4.026 5.72e-05 ***
## siteousSkyra -10734.5     813.2 -13.201 < 2e-16 ***
## siteUB       -7610.1     1595.1  -4.771 1.86e-06 ***
## siteUCAM     -3445.1     855.2  -4.028 5.67e-05 ***
## siteUKB       2319.4     651.3   3.561 0.000371 ***
## siteUmU     -13029.2     995.8 -13.084 < 2e-16 ***
## icv          5414.1     164.3  32.950 < 2e-16 ***
## ---
## Signif. codes:  0 '***' 0.001 '**' 0.01 '*' 0.05 '.' 0.1 ' ' 1
##
## Approximate significance of smooth terms:
##              edf Ref.df      F p-value
## s(bl_age)      3.497  3.497 143.431 <2e-16 ***
## s(bl_age):sleep_z 2.000  2.000   1.743   0.175
## s(bl_age):time  4.030  4.030  78.208 <2e-16 ***
## s(sleep_z):time  1.000  1.000   0.395   0.530
## ---
## Signif. codes:  0 '***' 0.001 '**' 0.01 '*' 0.05 '.' 0.1 ' ' 1
##
## R-sq.(adj) =  0.49
## lmer.REML = 1.6117e+05  Scale est. = 3.9226e+06  n = 8129

```

Below are plots of a plot of  $s(\text{bl\_age})$ ,  $s(\text{bl\_age}):\text{sleep\_z}$ ,  $s(\text{bl\_age}):\text{time}$ , and  $s(\text{sleep\_z}):\text{time}$ . For  $s(\text{sleep\_z}):\text{time}$ , roughly, if we cannot fit a straight line through the confidence bands, there is evidence that the effect of time depends on sleep duration. It is correct that the confidence interval is zero at one point along the axis; this happens because we do not include the main effect.

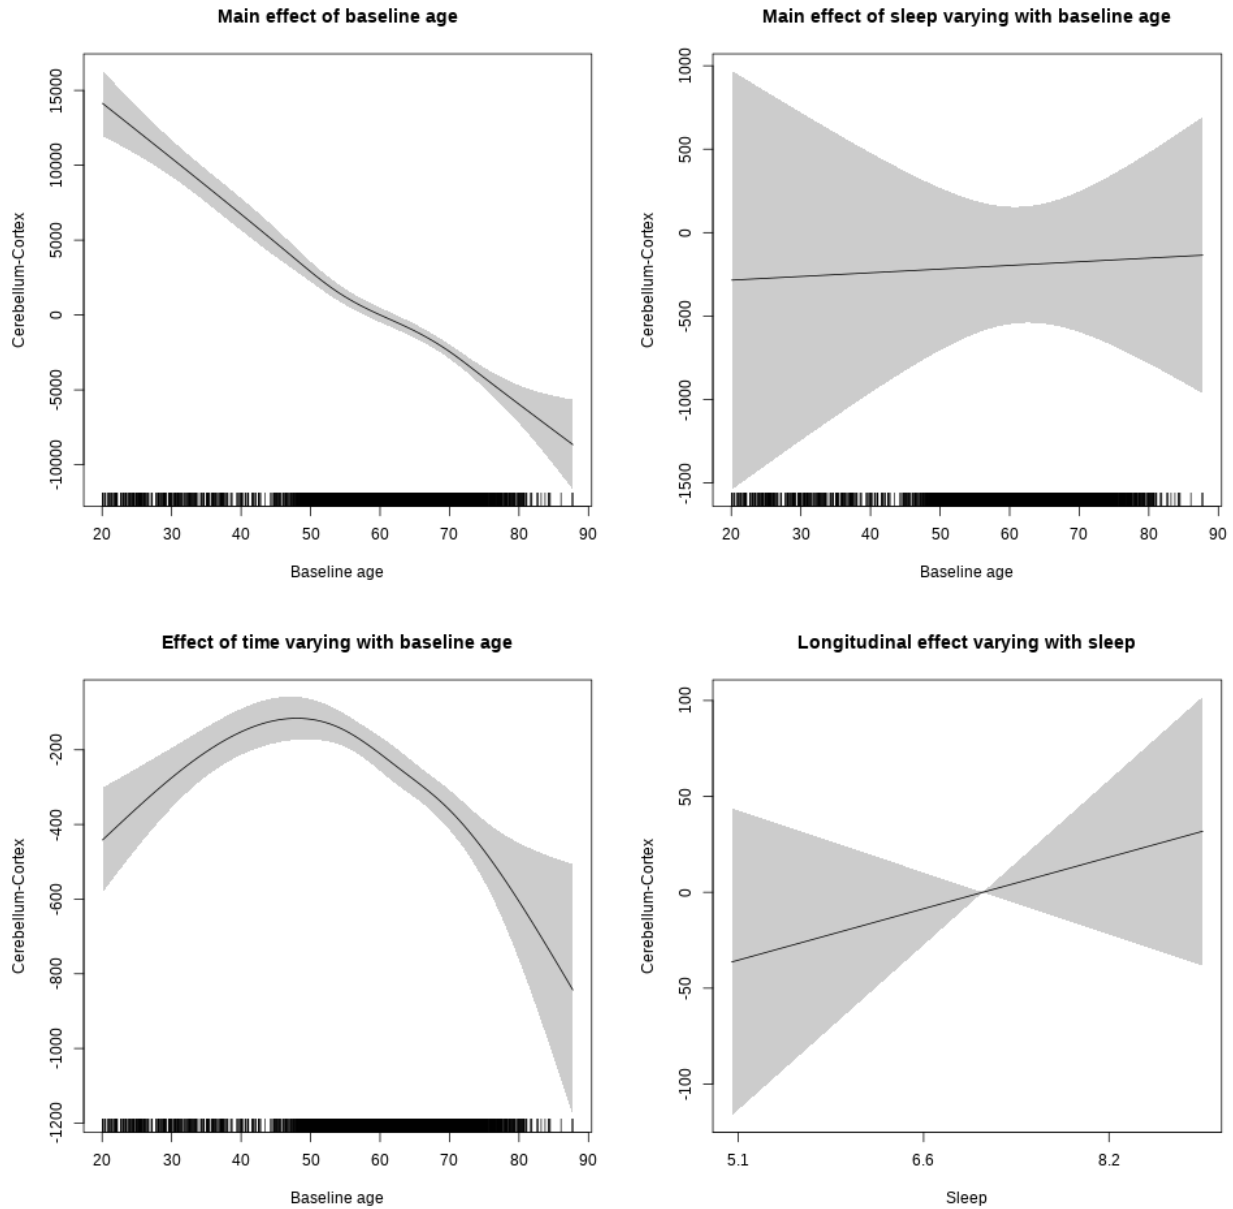

**Restricted to sleep  $\geq 5$  and  $\leq 9$  hours** Below is the row for `s(sleep_z):time` from the model output.

```
## s(sleep_z):time  1.000  1.000  0.823  0.364
```

Below are plots of a plot of `s(bl_age)`, `s(bl_age):sleep_z`, `s(bl_age):time`, and `s(sleep_z):time`. For `s(sleep_z):time`, roughly, if we cannot fit a straight line through the confidence bands, there is evidence that the effect of time depends on sleep duration. It is correct that the confidence interval is zero at one point along the axis; this happens because we do not include the main effect.

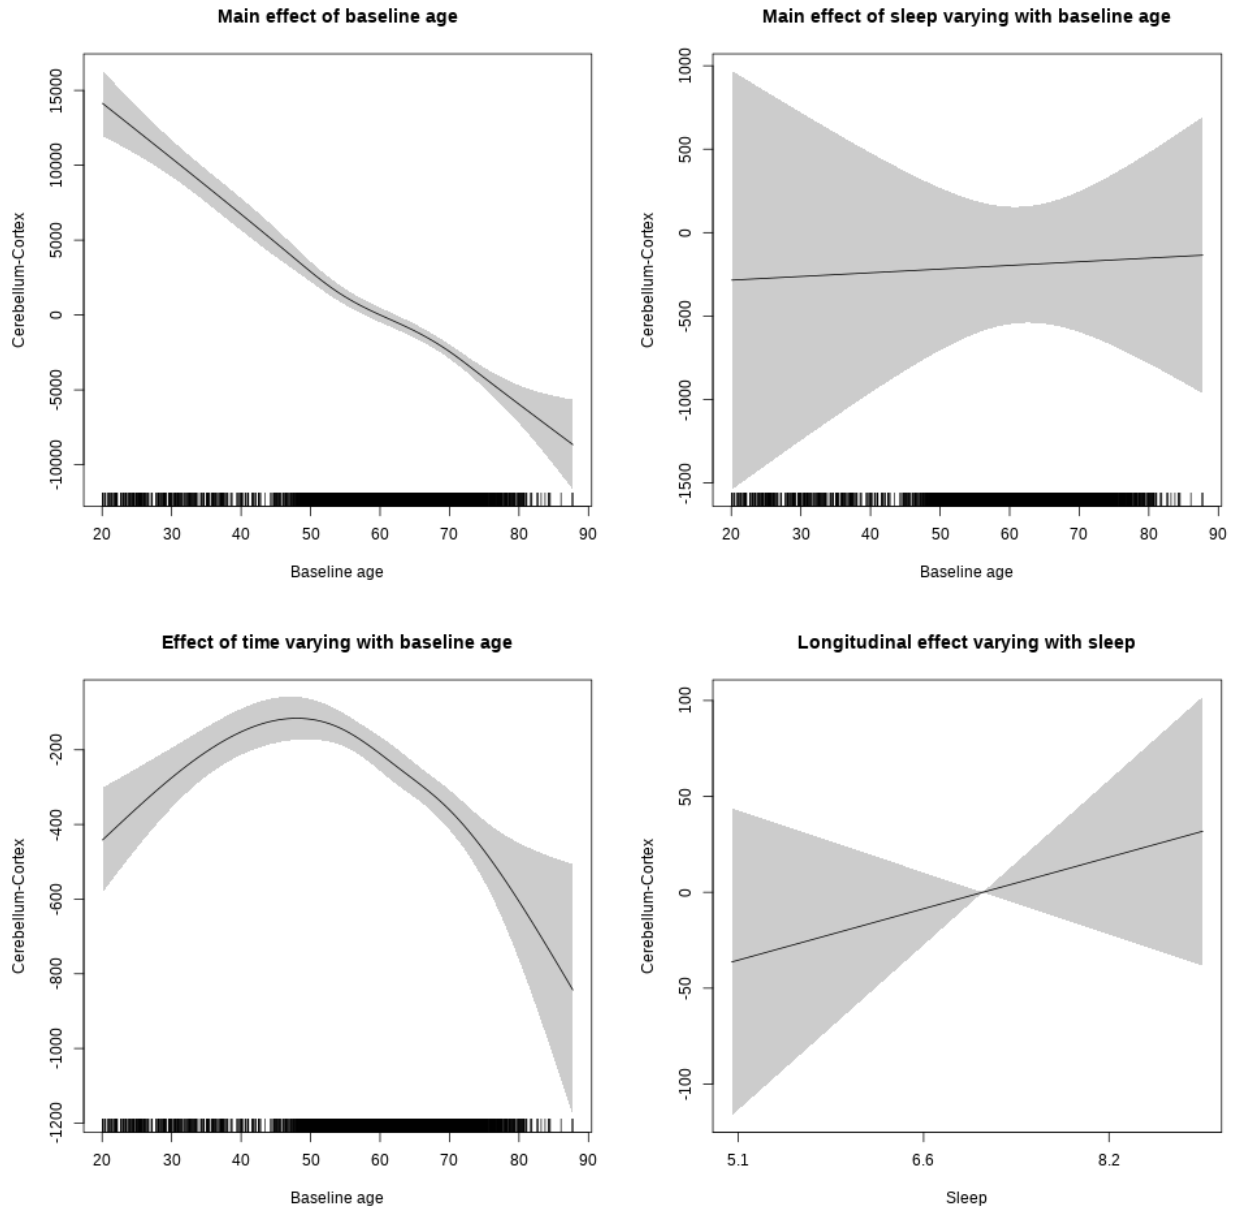

### Controlling for socioeconomic status

**Full data** Below is the model output. The term `s(sleep_z):time` is probably what we care most about.

```
##
## Family: gaussian
## Link function: identity
##
## Formula:
## value ~ sex + site + income_scaled + education_scaled + icv +
##       s(bl_age, k = 10, bs = "cr") + s(bl_age, by = sleep_z, bs = "cr") +
##       +s(bl_age, by = time, k = 5, bs = "cr") + s(sleep_z, by = time,
##       k = 5, bs = "cr", pc = 0)
```

```

## <environment: 0x56391139afc8>
##
## Parametric coefficients:
##           Estimate Std. Error t value Pr(>|t|)
## (Intercept) 110333.5    1705.3  64.699 < 2e-16 ***
## sexmale      4471.6      465.4   9.609 < 2e-16 ***
## siteousAvanto -12686.7    1821.3  -6.966 3.73e-12 ***
## siteousPrisma -8616.3    2993.0  -2.879 0.00401 **
## siteousSkyra -13831.2    1746.0  -7.922 2.92e-15 ***
## siteUKB      -713.8     1617.3  -0.441 0.65900
## income_scaled  544.0      603.8   0.901 0.36771
## education_scaled  549.4      669.1   0.821 0.41164
## icv          6319.7     223.1  28.331 < 2e-16 ***
## ---
## Signif. codes:  0 '***' 0.001 '**' 0.01 '*' 0.05 '.' 0.1 ' ' 1
##
## Approximate significance of smooth terms:
##           edf Ref.df    F p-value
## s(bl_age)      3.087  3.087 46.803 <2e-16 ***
## s(bl_age):sleep_z 2.000  2.000  0.352  0.704
## s(bl_age):time  3.586  3.586 32.520 <2e-16 ***
## s(sleep_z):time  1.000  1.000  0.000  0.995
## ---
## Signif. codes:  0 '***' 0.001 '**' 0.01 '*' 0.05 '.' 0.1 ' ' 1
##
## R-sq.(adj) =  0.426
## lmer.REML = 92132  Scale est. = 3.8173e+06  n = 4636

```

Below are plots of a plot of  $s(\text{bl\_age})$ ,  $s(\text{bl\_age}):\text{sleep\_z}$ ,  $s(\text{bl\_age}):\text{time}$ , and  $s(\text{sleep\_z}):\text{time}$ . For  $s(\text{sleep\_z}):\text{time}$ , roughly, if we cannot fit a straight line through the confidence bands, there is evidence that the effect of time depends on sleep duration. It is correct that the confidence interval is zero at one point along the axis; this happens because we do not include the main effect.

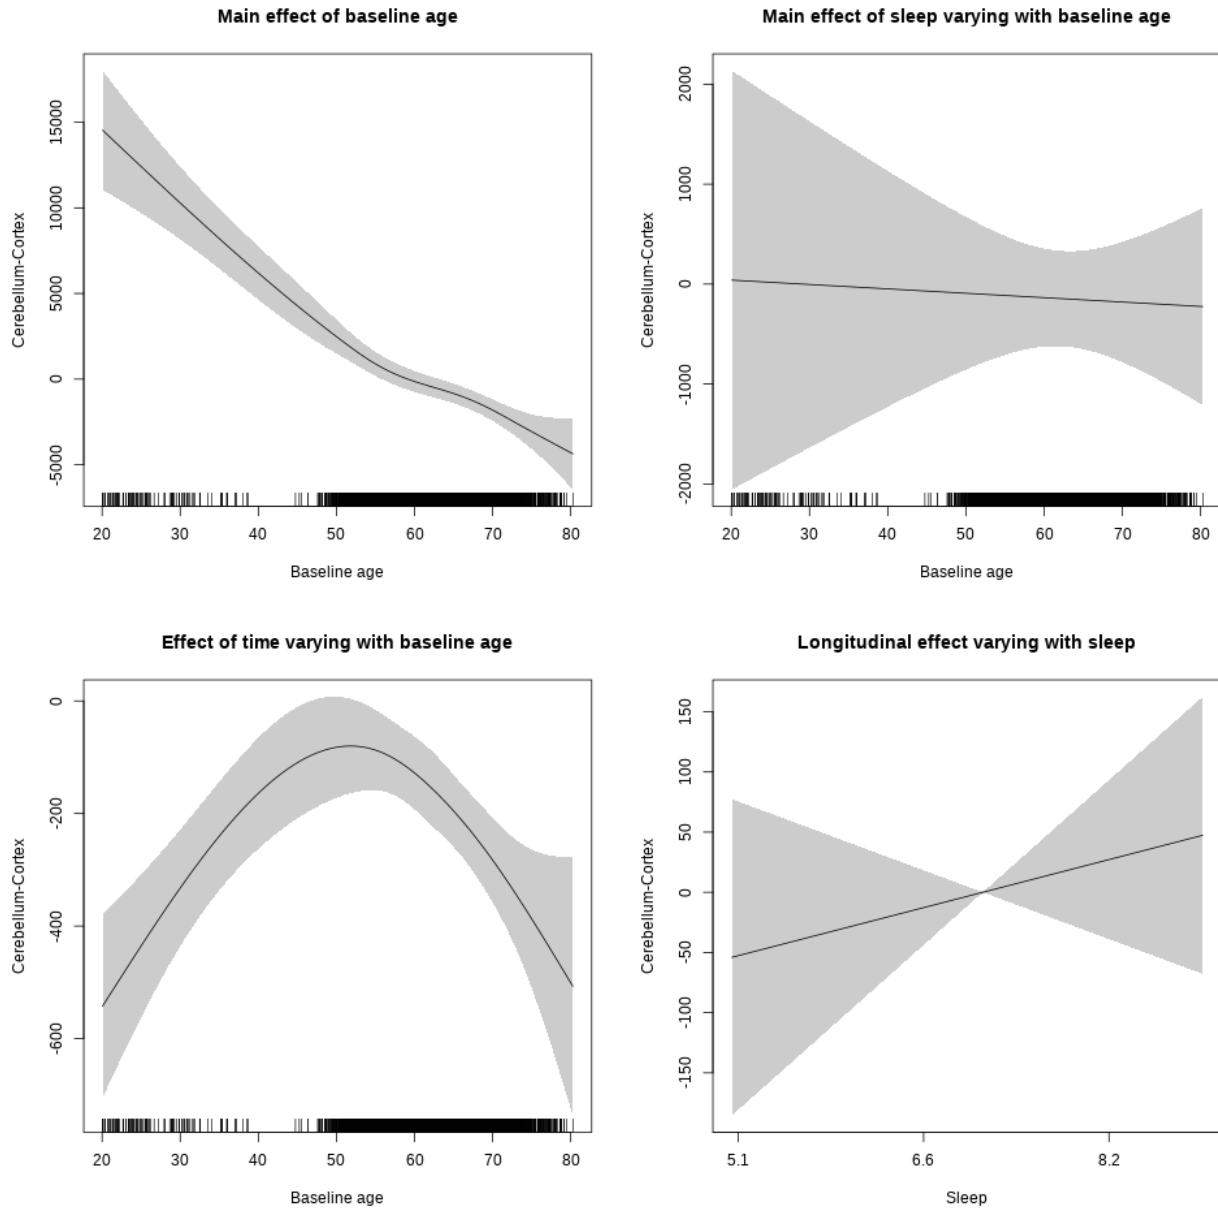

**Restricted to sleep  $\geq 5$  and  $\leq 9$  hours** Below is the row for `s(sleep_z):time` from the model output.

```
## s(sleep_z):time  1.000  1.000  0.676  0.411
```

Below are plots of a plot of `s(bl_age)`, `s(bl_age):sleep_z`, `s(bl_age):time`, and `s(sleep_z):time`. For `s(sleep_z):time`, roughly, if we cannot fit a straight line through the confidence bands, there is evidence that the effect of time depends on sleep duration. It is correct that the confidence interval is zero at one point along the axis; this happens because we do not include the main effect.



## Controlling for BMI

**Full data** Below is the model output. The term `s(sleep_z):time` is probably what we care most about.

```
##
## Family: gaussian
## Link function: identity
##
## Formula:
## value ~ sex + site + bmi + icv + s(bl_age, k = 10, bs = "cr") +
##   s(bl_age, by = sleep_z, bs = "cr") + s(bl_age, by = time,
##   k = 5, bs = "cr") + s(sleep_z, by = time, k = 5, bs = "cr",
##   pc = 0)
```

```

## <environment: 0x5639111f2bd8>
##
## Parametric coefficients:
##           Estimate Std. Error t value Pr(>|t|)
## (Intercept) 101906.54   1466.12   69.508 < 2e-16 ***
## sexmale      4657.12    425.22   10.952 < 2e-16 ***
## siteousPrisma 1720.32   1621.21    1.061 0.28868
## siteousSkyra -1032.52    520.49   -1.984 0.04734 *
## siteUCAM     5774.28   1073.54    5.379 7.82e-08 ***
## siteUKB      11675.73    991.89   11.771 < 2e-16 ***
## siteUmU     -2982.40   1261.21   -2.365 0.01808 *
## bmi         -124.20     44.62    -2.784 0.00539 **
## icv         6203.12    205.08   30.248 < 2e-16 ***
## ---
## Signif. codes:  0 '***' 0.001 '**' 0.01 '*' 0.05 '.' 0.1 ' ' 1
##
## Approximate significance of smooth terms:
##           edf Ref.df    F p-value
## s(bl_age)      2.917  2.917 98.322 <2e-16 ***
## s(bl_age):sleep_z 2.000  2.000  2.454 0.0861 .
## s(bl_age):time  3.871  3.871 41.461 <2e-16 ***
## s(sleep_z):time 1.000  1.000  0.018 0.8936
## ---
## Signif. codes:  0 '***' 0.001 '**' 0.01 '*' 0.05 '.' 0.1 ' ' 1
##
## R-sq.(adj) = 0.48
## lmer.REML = 1.0717e+05 Scale est. = 3.9421e+06 n = 5390

```

Below are plots of a plot of `s(bl_age)`, `s(bl_age):sleep_z`, `s(bl_age):time`, and `s(sleep_z):time`. For `s(sleep_z):time`, roughly, if we cannot fit a straight line through the confidence bands, there is evidence that the effect of time depends on sleep duration. It is correct that the confidence interval is zero at one point along the axis; this happens because we do not include the main effect.



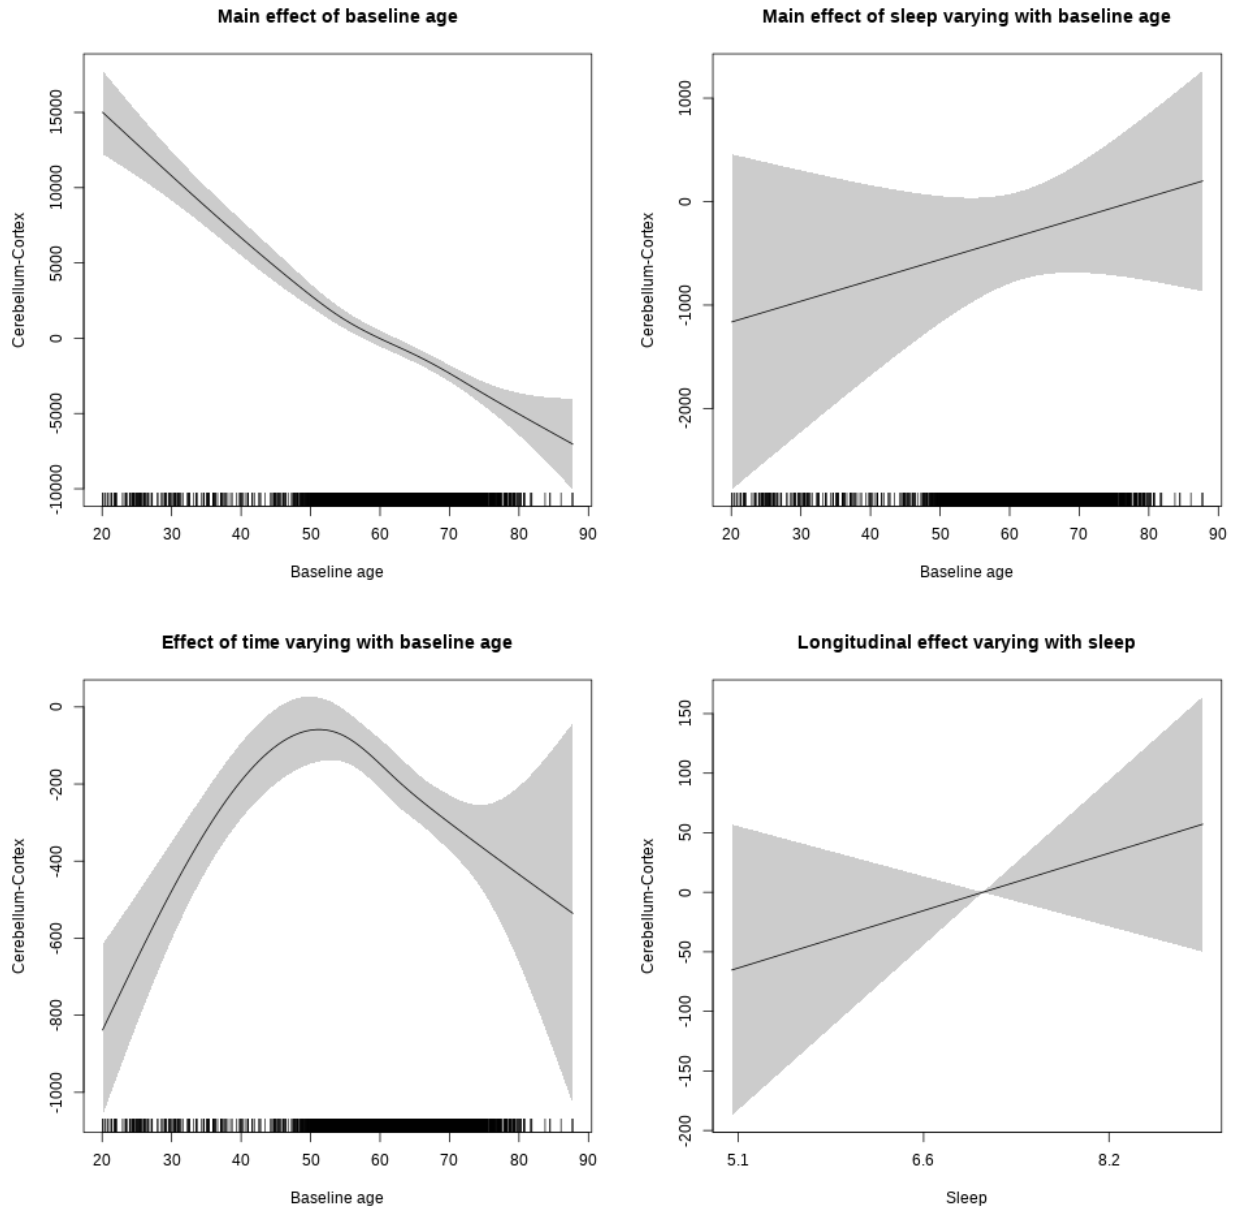

**Restricted to sleep  $\geq 5$  and  $\leq 9$  hours** Below is the row for `s(sleep_z):time` from the model output.

```
## s(sleep_z):time  1.000  1.000  1.140  0.286
```

Below are plots of a plot of `s(bl_age)`, `s(bl_age):sleep_z`, `s(bl_age):time`, and `s(sleep_z):time`. For `s(sleep_z):time`, roughly, if we cannot fit a straight line through the confidence bands, there is evidence that the effect of time depends on sleep duration. It is correct that the confidence interval is zero at one point along the axis; this happens because we do not include the main effect.



## Controlling for depression

**Full data** Below is the model output. The term `s(sleep_z):time` is probably what we care most about.

```
##
## Family: gaussian
## Link function: identity
##
## Formula:
## value ~ sex + site + depression + icv + s(bl_age, k = 10, bs = "cr") +
##   s(bl_age, by = sleep_z, bs = "cr") + +s(bl_age, by = time,
##   k = 5, bs = "cr") + s(sleep_z, by = time, k = 5, bs = "cr",
##   pc = 0)
```

```

## <environment: 0x56391587d9f8>
##
## Parametric coefficients:
##           Estimate Std. Error t value Pr(>|t|)
## (Intercept) 108144.1     800.4 135.120 < 2e-16 ***
## sexmale      4718.7      418.2  11.283 < 2e-16 ***
## siteousAvanto -7569.8    1608.8  -4.705 2.60e-06 ***
## siteousPrisma -8467.5    2406.8  -3.518 0.000438 ***
## siteousSkyra -9772.0    1465.8  -6.667 2.86e-11 ***
## siteUCAM     -3658.5     966.0  -3.787 0.000154 ***
## siteUKB      1989.3     737.8   2.696 0.007033 **
## siteUmU     -12413.1    1194.3 -10.393 < 2e-16 ***
## depression  -1014.5    1488.4  -0.682 0.495522
## icv         5834.8     197.1  29.611 < 2e-16 ***
## ---
## Signif. codes:  0 '***' 0.001 '**' 0.01 '*' 0.05 '.' 0.1 ' ' 1
##
## Approximate significance of smooth terms:
##           edf Ref.df      F p-value
## s(bl_age)      3.204  3.204 78.342 <2e-16 ***
## s(bl_age):sleep_z 2.000  2.000  1.178  0.308
## s(bl_age):time  3.693  3.693 42.813 <2e-16 ***
## s(sleep_z):time  1.000  1.000  0.014  0.906
## ---
## Signif. codes:  0 '***' 0.001 '**' 0.01 '*' 0.05 '.' 0.1 ' ' 1
##
## R-sq.(adj) =  0.469
## lmer.REML = 1.1241e+05  Scale est. = 3.723e+06  n = 5657

```

Below are plots of a plot of `s(bl_age)`, `s(bl_age):sleep_z`, `s(bl_age):time`, and `s(sleep_z):time`. For `s(sleep_z):time`, roughly, if we cannot fit a straight line through the confidence bands, there is evidence that the effect of time depends on sleep duration. It is correct that the confidence interval is zero at one point along the axis; this happens because we do not include the main effect.

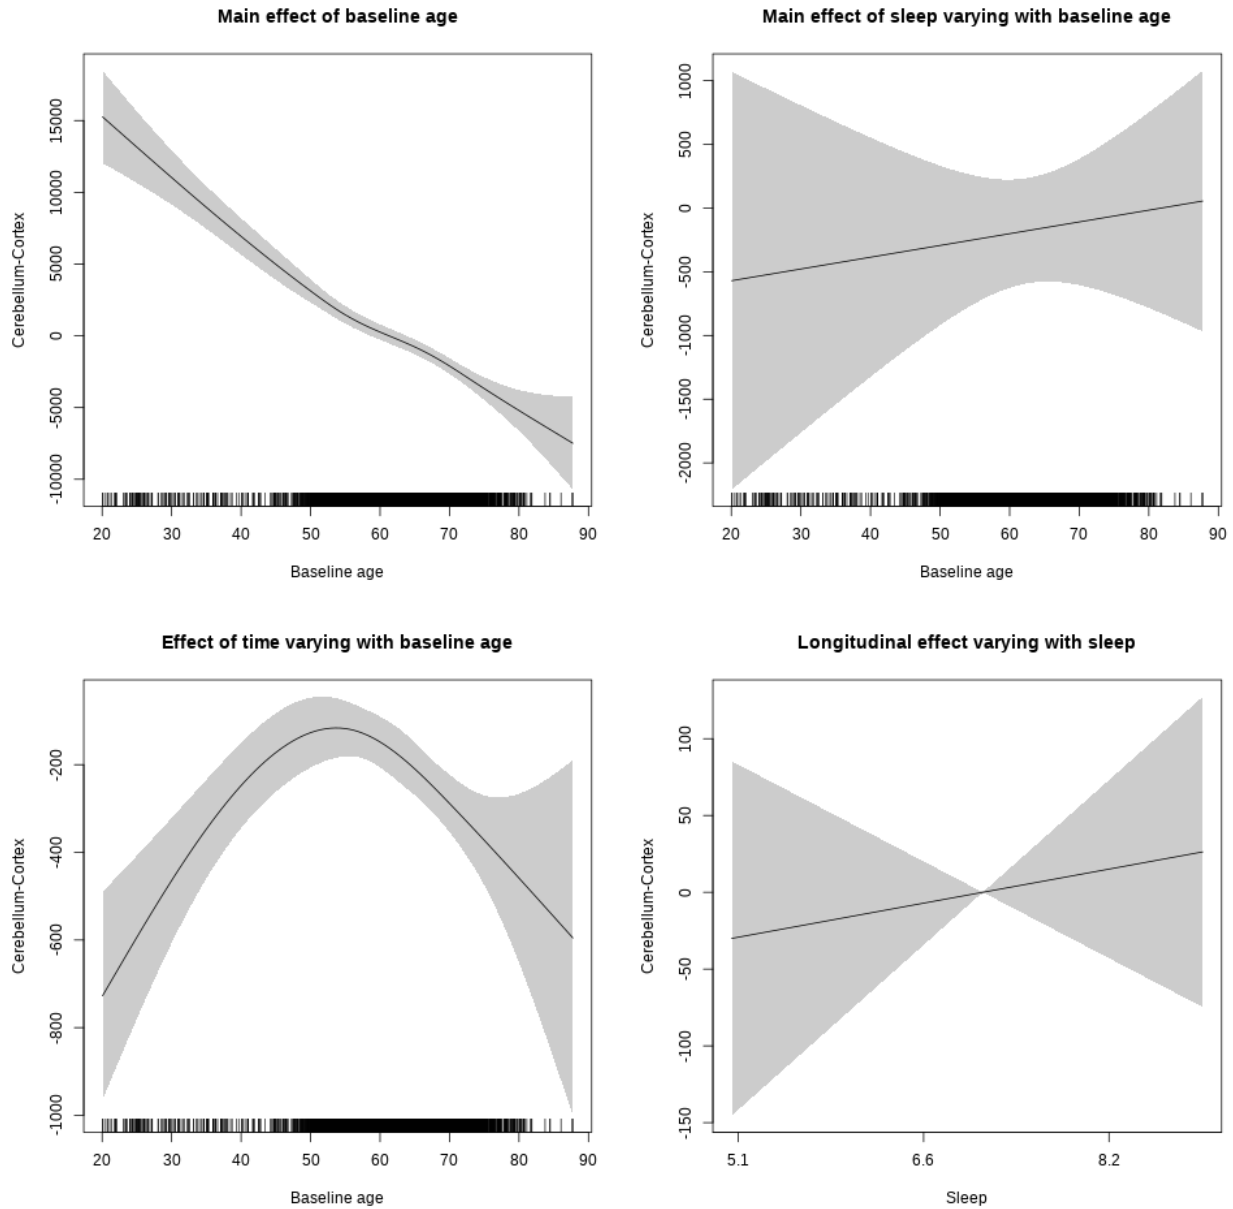

**Restricted to sleep  $\geq 5$  and  $\leq 9$  hours** Below is the row for `s(sleep_z):time` from the model output.

```
## s(sleep_z):time  1.000  1.000  0.271  0.603
```

Below are plots of a plot of `s(bl_age)`, `s(bl_age):sleep_z`, `s(bl_age):time`, and `s(sleep_z):time`. For `s(sleep_z):time`, roughly, if we cannot fit a straight line through the confidence bands, there is evidence that the effect of time depends on sleep duration. It is correct that the confidence interval is zero at one point along the axis; this happens because we do not include the main effect.

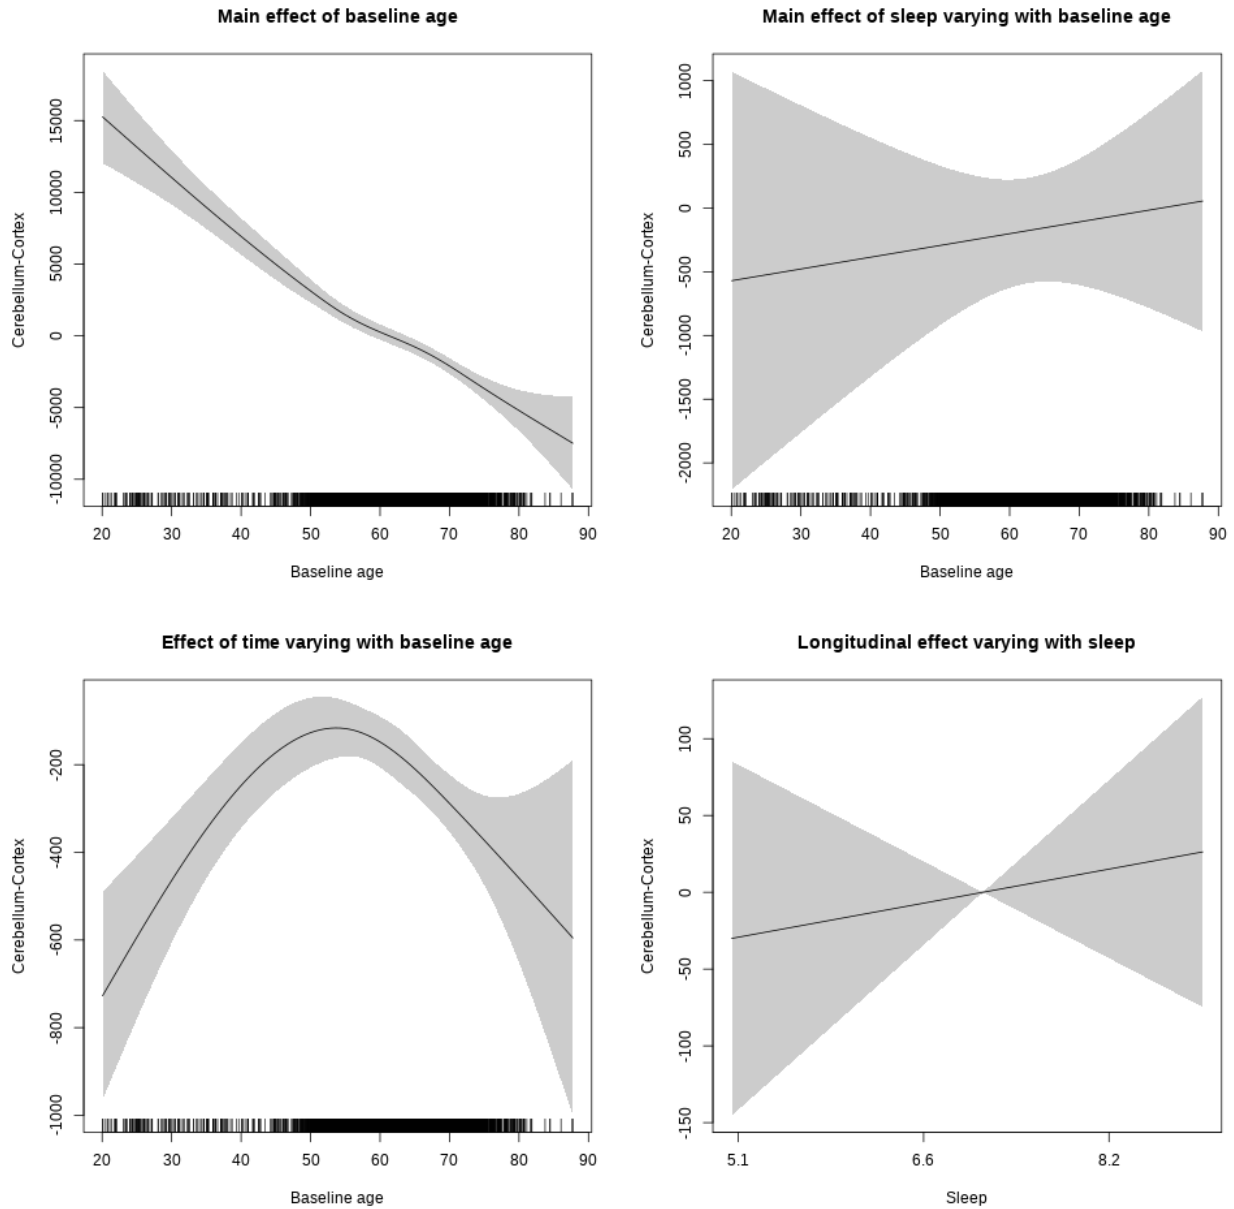

### Controlling for sleep quality

**Full data** Below is the model output. The term `s(sleep_z):time` is probably what we care most about.

```
##
## Family: gaussian
## Link function: identity
##
## Formula:
## value ~ X + s(bl_age, k = 10, bs = "cr") + s(bl_age, by = sleep_z,
##       bs = "cr") + s(bl_age, by = time, k = 5, bs = "cr") + s(sleep_z,
##       by = time, k = 5, bs = "cr", pc = 0)
## <environment: 0x563910f8b370>
```

```

##
## Parametric coefficients:
##           Estimate Std. Error t value Pr(>|t|)
## (Intercept)      97015.78   1251.13  77.543 < 2e-16 ***
## Xsexmale         11360.56    471.19  24.110 < 2e-16 ***
## XsiteousAvanto    3193.09    1192.64   2.677 0.007450 **
## XsiteousPrisma    7053.04    1968.94   3.582 0.000345 ***
## XsiteousSkyra   -1139.77    1195.57  -0.953 0.340480
## XsiteUB          -165.93    1906.94  -0.087 0.930666
## XsiteUCAM        5944.13    1210.21   4.912 9.37e-07 ***
## XsiteUKB         10142.99   3829.99   2.648 0.008120 **
## XsiteUmU        -6615.07    1362.98  -4.853 1.26e-06 ***
## Xukb_dummy:sleep_accel  -67.56    299.88  -0.225 0.821756
## Xukb_dummy:chronotype  -72.97    394.30  -0.185 0.853183
## Xukb_dummy:dozing     69.90    813.35   0.086 0.931519
## Xukb_dummy:sleeplessness -616.65   504.52  -1.222 0.221680
## Xukb_dummy:snoring    1131.61    718.63   1.575 0.115408
## Xukb_dummy:gettingup   291.26    547.61   0.532 0.594844
## Xnotukb_dummy:PSQI_Global -32.31    155.02  -0.208 0.834902
## ---
## Signif. codes:  0 '***' 0.001 '**' 0.01 '*' 0.05 '.' 0.1 ' ' 1
##
## Approximate significance of smooth terms:
##           edf Ref.df      F p-value
## s(bl_age)      1.000  1.000 358.406 <2e-16 ***
## s(bl_age):sleep_z 2.000  2.000   0.872   0.418
## s(bl_age):time  3.777  3.777  60.575 <2e-16 ***
## s(sleep_z):time  1.000  1.000   0.338   0.561
## ---
## Signif. codes:  0 '***' 0.001 '**' 0.01 '*' 0.05 '.' 0.1 ' ' 1
##
## R-sq.(adj) =  0.415
## lmer.REML = 84841 Scale est. = 4.1522e+06 n = 4271

```

Below are plots of a plot of  $s(\text{bl\_age})$ ,  $s(\text{bl\_age}):\text{sleep\_z}$ ,  $s(\text{bl\_age}):\text{time}$ , and  $s(\text{sleep\_z}):\text{time}$ . For  $s(\text{sleep\_z}):\text{time}$ , roughly, if we cannot fit a straight line through the confidence bands, there is evidence that the effect of time depends on sleep duration. It is correct that that confidence interval is zero at one point along the axis; this happens because we do not include the main effect.

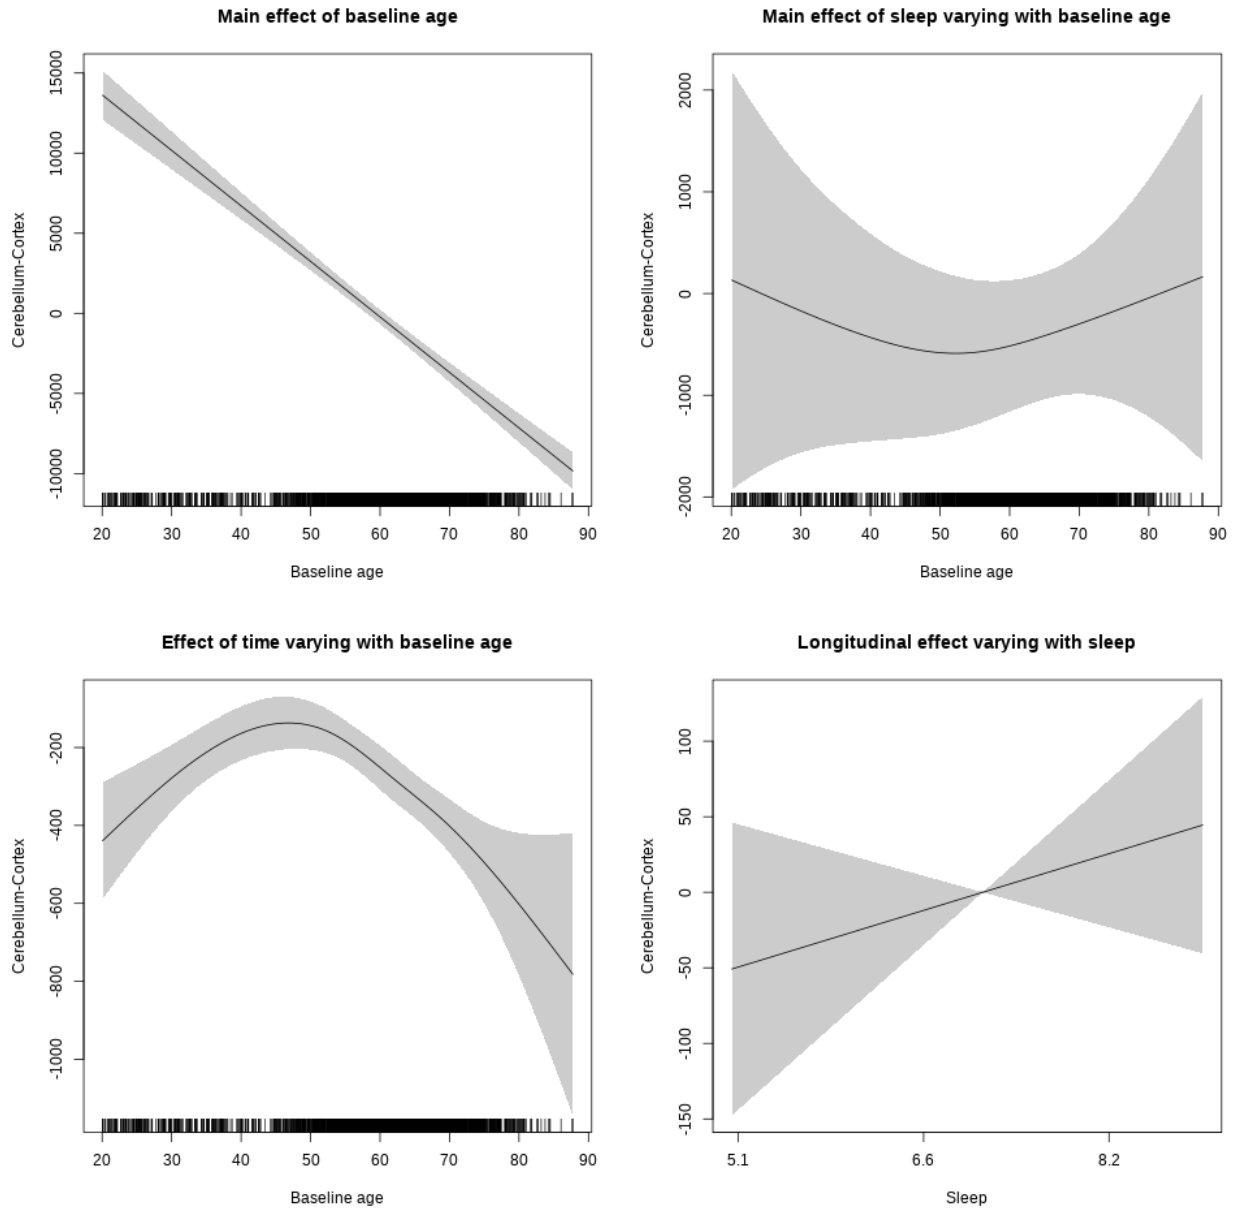

**Restricted to sleep  $\geq 5$  and  $\leq 9$  hours** Below is the row for `s(sleep_z):time` from the model output.

```
## s(sleep_z):time  1.000  1.000  1.097  0.295
```

Below are plots of a plot of `s(bl_age)`, `s(bl_age):sleep_z`, `s(bl_age):time`, and `s(sleep_z):time`. For `s(sleep_z):time`, roughly, if we cannot fit a straight line through the confidence bands, there is evidence that the effect of time depends on sleep duration. It is correct that the confidence interval is zero at one point along the axis; this happens because we do not include the main effect.

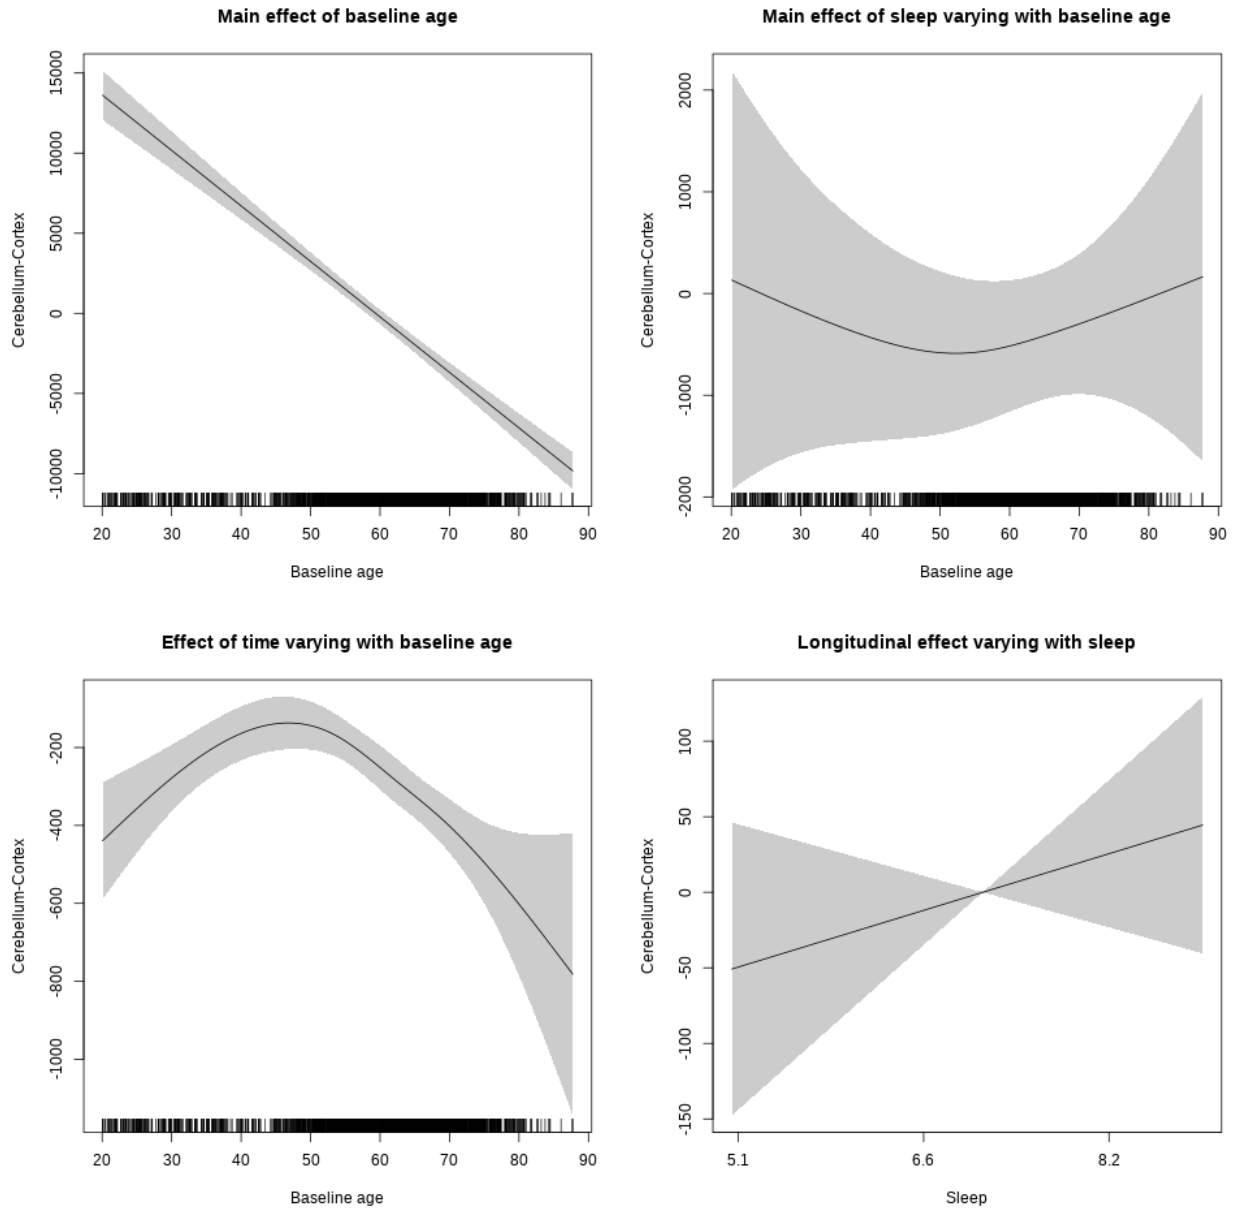

## Cerebellum-White-Matter

### Main analysis

**Full data** Below is the model output. The term `s(sleep_z):time` is probably what we care most about.

```
##
## Family: gaussian
## Link function: identity
##
## Formula:
## value ~ sex + site + icv + s(bl_age, k = 10, bs = "cr") + s(bl_age,
##   by = sleep_z, bs = "cr") + +s(bl_age, by = time, k = 5, bs = "cr") +
```



```

##      s(sleep_z, by = time, k = 5, bs = "cr", pc = 0)
## <environment: 0x56391e8b20d0>
##
## Parametric coefficients:
##              Estimate Std. Error t value Pr(>|t|)
## (Intercept)  30087.46    271.40 110.860 < 2e-16 ***
## sexmale      -273.13     139.60  -1.956 0.050444 .
## siteousAvanto -1395.55    333.91  -4.179 2.95e-05 ***
## siteousPrisma -6666.95   1020.59  -6.532 6.86e-11 ***
## siteousSkyra  1110.30     324.51   3.421 0.000626 ***
## siteUB       -2289.24    621.85  -3.681 0.000234 ***
## siteUCAM     -1771.92    340.99  -5.196 2.08e-07 ***
## siteUKB      1361.36     258.77   5.261 1.47e-07 ***
## siteUmU      8270.55     390.80  21.163 < 2e-16 ***
## icv          2003.82      67.87  29.525 < 2e-16 ***
## ---
## Signif. codes:  0 '***' 0.001 '**' 0.01 '*' 0.05 '.' 0.1 ' ' 1
##
## Approximate significance of smooth terms:
##              edf Ref.df      F p-value
## s(bl_age)      5.814  5.814 64.811 < 2e-16 ***
## s(bl_age):sleep_z 2.000  2.000  0.058 0.943578
## s(bl_age):time  4.565  4.565 23.237 < 2e-16 ***
## s(sleep_z):time  1.000  1.000 13.463 0.000245 ***
## ---
## Signif. codes:  0 '***' 0.001 '**' 0.01 '*' 0.05 '.' 0.1 ' ' 1
##
## R-sq.(adj) =  0.401
## lmer.REML = 1.4986e+05  Scale est. = 1.6102e+06  n = 8116

```

Below are plots of a plot of  $s(\text{bl\_age})$ ,  $s(\text{bl\_age}):\text{sleep\_z}$ ,  $s(\text{bl\_age}):\text{time}$ , and  $s(\text{sleep\_z}):\text{time}$ . For  $s(\text{sleep\_z}):\text{time}$ , roughly, if we cannot fit a straight line through the confidence bands, there is evidence that the effect of time depends on sleep duration. It is correct that the confidence interval is zero at one point along the axis; this happens because we do not include the main effect.

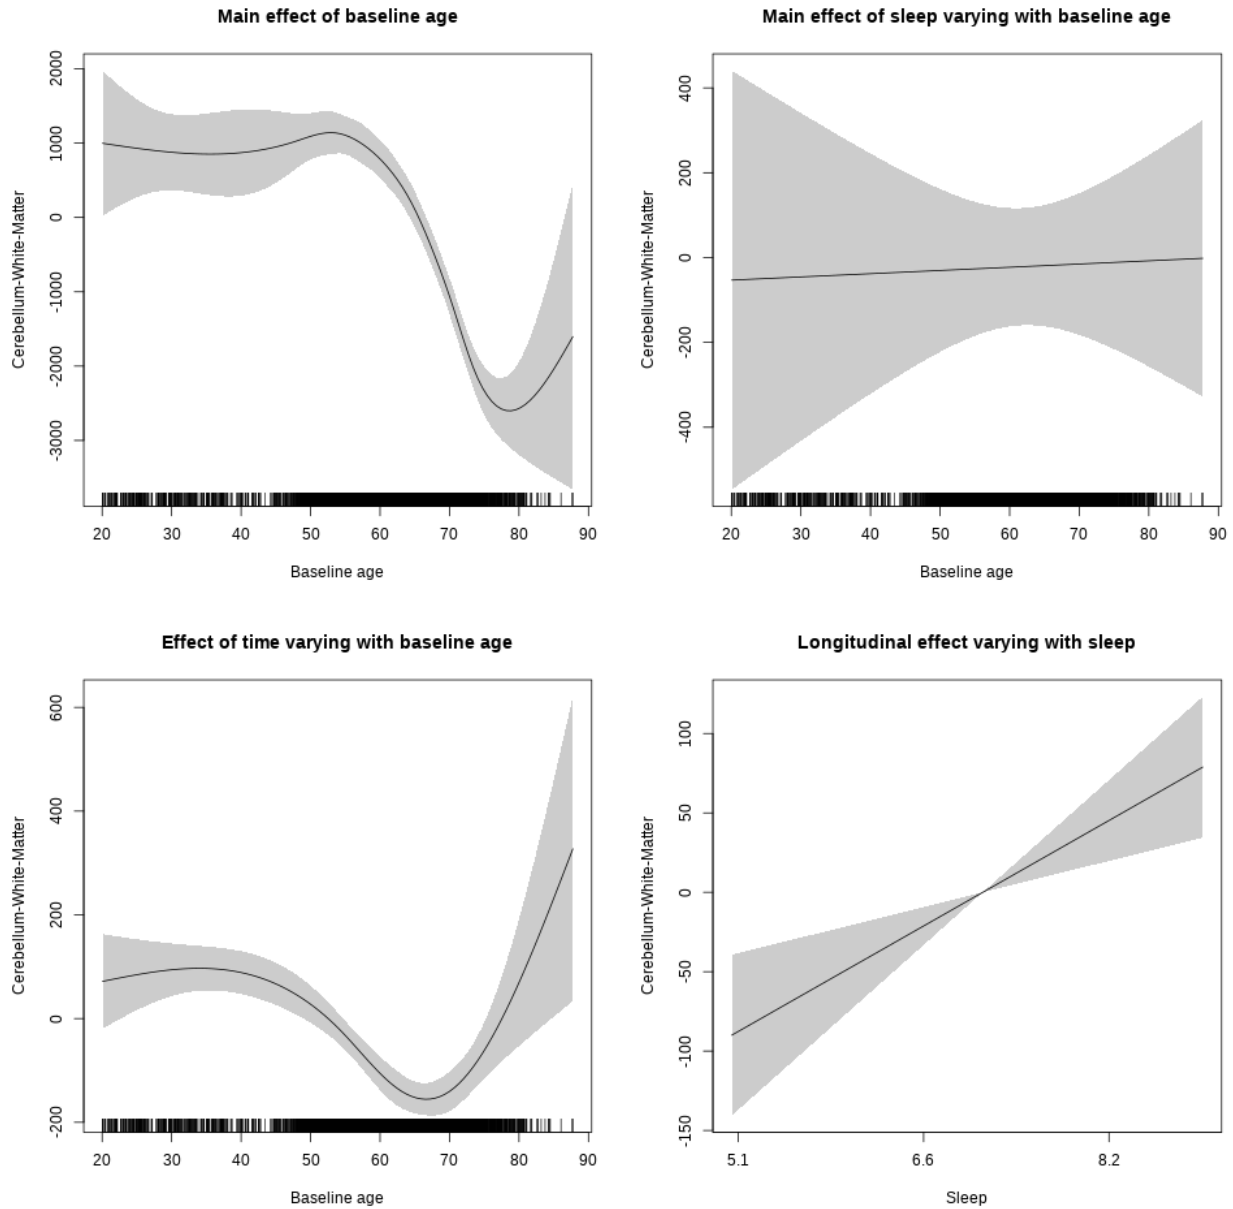

**Restricted to sleep  $\geq 5$  and  $\leq 9$  hours** Below is the row for `s(sleep_z):time` from the model output.

```
## s(sleep_z):time  1.000  1.000 12.630 0.000382 ***
```

Below are plots of a plot of `s(bl_age)`, `s(bl_age):sleep_z`, `s(bl_age):time`, and `s(sleep_z):time`. For `s(sleep_z):time`, roughly, if we cannot fit a straight line through the confidence bands, there is evidence that the effect of time depends on sleep duration. It is correct that the confidence interval is zero at one point along the axis; this happens because we do not include the main effect.

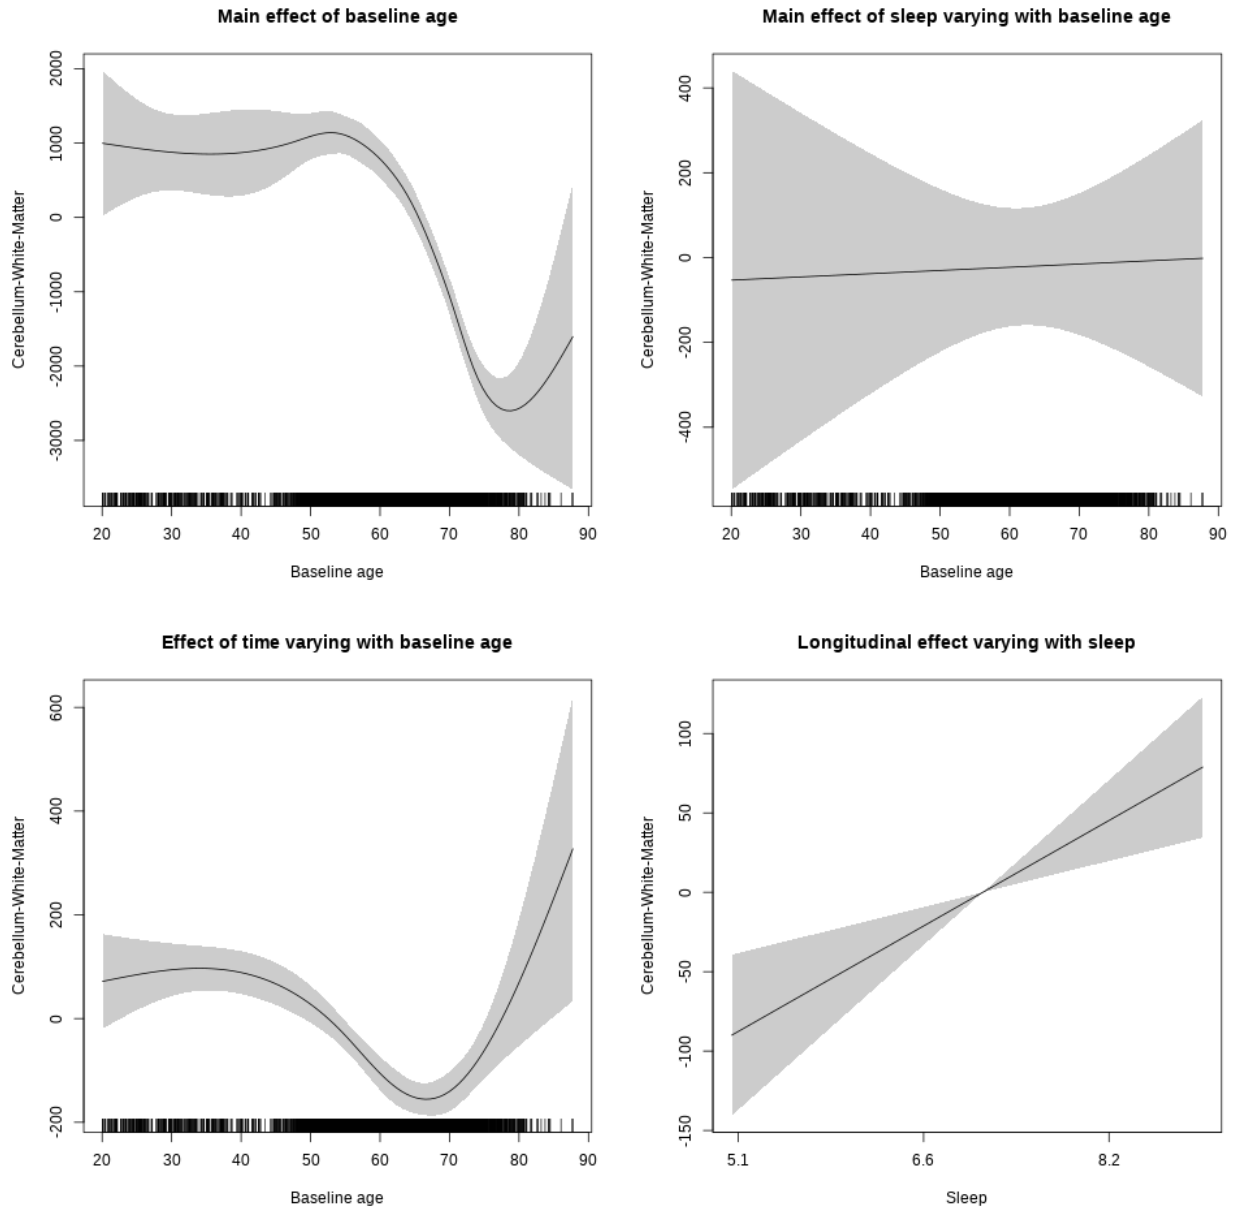

## Controlling for socioeconomic status

**Full data** Below is the model output. The term `s(sleep_z):time` is probably what we care most about.

```
##
## Family: gaussian
## Link function: identity
##
## Formula:
## value ~ sex + site + income_scaled + education_scaled + icv +
##       s(bl_age, k = 10, bs = "cr") + s(bl_age, by = sleep_z, bs = "cr") +
##       +s(bl_age, by = time, k = 5, bs = "cr") + s(sleep_z, by = time,
##       k = 5, bs = "cr", pc = 0)
```

```

## <environment: 0x563911525f08>
##
## Parametric coefficients:
##           Estimate Std. Error t value Pr(>|t|)
## (Intercept)  30332.06    605.57  50.089 < 2e-16 ***
## sexmale      -386.45    166.73  -2.318  0.0205 *
## siteousAvanto -2685.15    683.28  -3.930  8.63e-05 ***
## siteousPrisma -7902.84   1698.00  -4.654  3.34e-06 ***
## siteousSkyra   824.24    617.15   1.336  0.1818
## siteUKB       852.65    572.87   1.488  0.1367
## income_scaled  112.78    212.85   0.530  0.5962
## education_scaled 401.28    234.96   1.708  0.0877 .
## icv          2208.52    83.62  26.411 < 2e-16 ***
## ---
## Signif. codes:  0 '***' 0.001 '**' 0.01 '*' 0.05 '.' 0.1 ' ' 1
##
## Approximate significance of smooth terms:
##           edf Ref.df    F p-value
## s(bl_age)      3.978  3.978 57.970 <2e-16 ***
## s(bl_age):sleep_z 2.000  2.000  0.189  0.828
## s(bl_age):time  4.282  4.282 19.429 <2e-16 ***
## s(sleep_z):time 1.000  1.000  0.853  0.356
## ---
## Signif. codes:  0 '***' 0.001 '**' 0.01 '*' 0.05 '.' 0.1 ' ' 1
##
## R-sq.(adj) =  0.35
## lmer.REML = 85307  Scale est. = 1.6828e+06  n = 4630

```

Below are plots of a plot of  $s(\text{bl\_age})$ ,  $s(\text{bl\_age}):\text{sleep\_z}$ ,  $s(\text{bl\_age}):\text{time}$ , and  $s(\text{sleep\_z}):\text{time}$ . For  $s(\text{sleep\_z}):\text{time}$ , roughly, if we cannot fit a straight line through the confidence bands, there is evidence that the effect of time depends on sleep duration. It is correct that the confidence interval is zero at one point along the axis; this happens because we do not include the main effect.

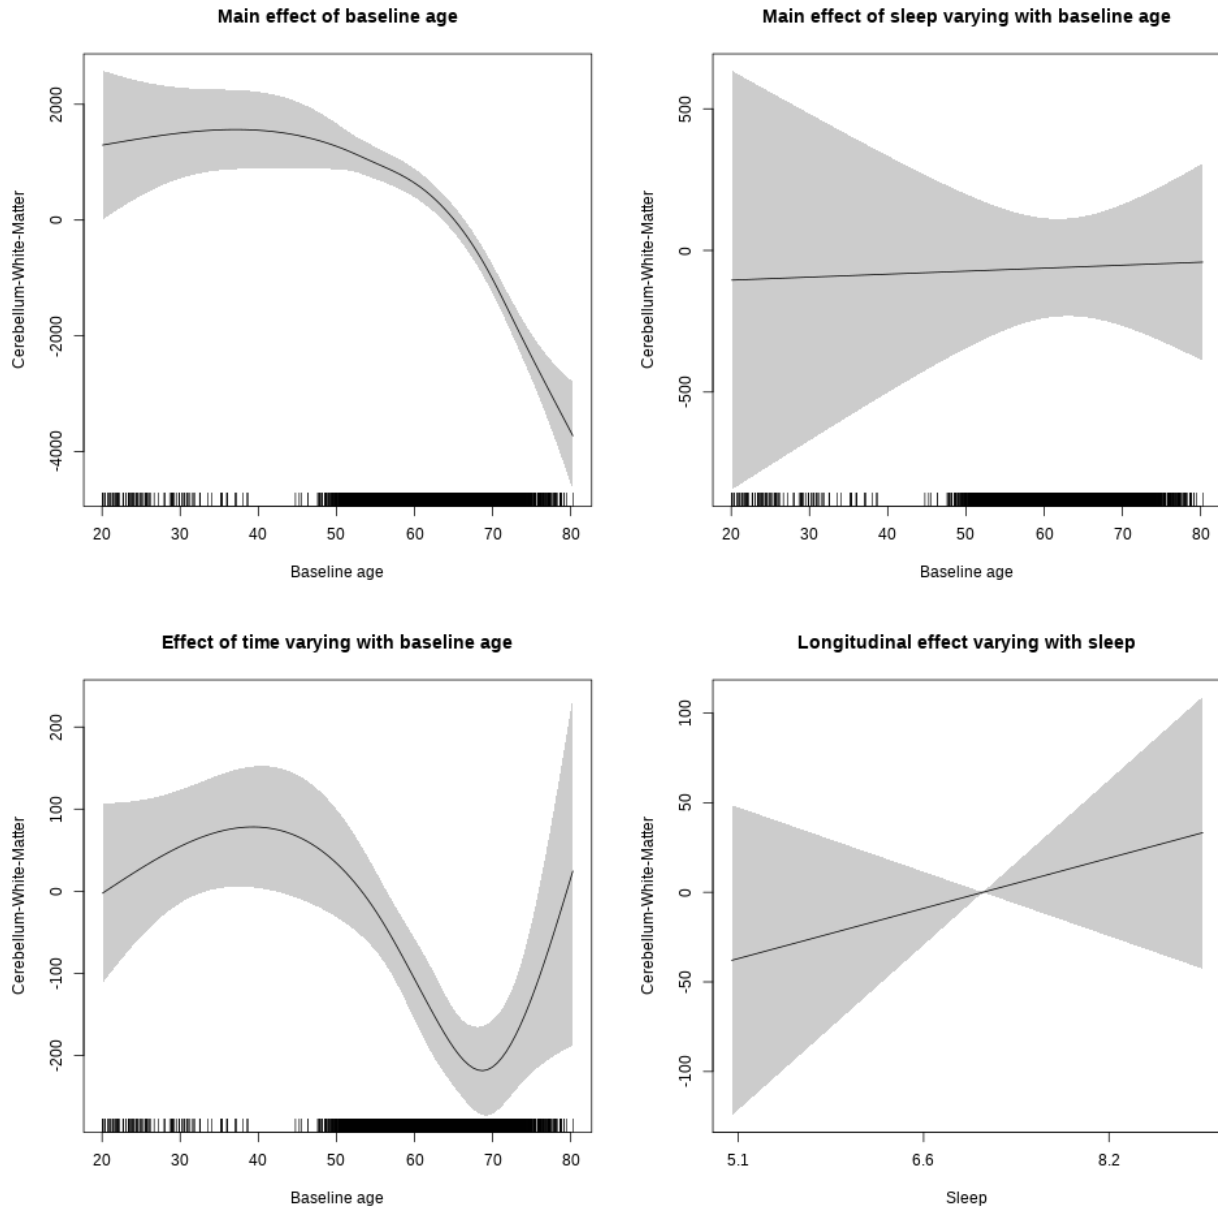

**Restricted to sleep  $\geq 5$  and  $\leq 9$  hours** Below is the row for `s(sleep_z):time` from the model output.

```
## s(sleep_z):time  1.000  1.000  0.768  0.381
```

Below are plots of a plot of `s(bl_age)`, `s(bl_age):sleep_z`, `s(bl_age):time`, and `s(sleep_z):time`. For `s(sleep_z):time`, roughly, if we cannot fit a straight line through the confidence bands, there is evidence that the effect of time depends on sleep duration. It is correct that the confidence interval is zero at one point along the axis; this happens because we do not include the main effect.



## Controlling for BMI

**Full data** Below is the model output. The term `s(sleep_z):time` is probably what we care most about.

```
##
## Family: gaussian
## Link function: identity
##
## Formula:
## value ~ sex + site + bmi + icv + s(bl_age, k = 10, bs = "cr") +
##   s(bl_age, by = sleep_z, bs = "cr") + +s(bl_age, by = time,
##     k = 5, bs = "cr") + s(sleep_z, by = time, k = 5, bs = "cr",
##     pc = 0)
```

```

## <environment: 0x56390d7065c0>
##
## Parametric coefficients:
##           Estimate Std. Error t value Pr(>|t|)
## (Intercept) 30043.95    633.80  47.403 < 2e-16 ***
## sexmale     -398.24    174.09  -2.288  0.0222 *
## siteousPrisma -5470.07  1054.99  -5.185 2.24e-07 ***
## siteousSkyra  2674.14    333.26   8.024 1.25e-15 ***
## siteUCAM     -492.43    495.50  -0.994  0.3204
## siteUKB      2219.33    463.32   4.790 1.71e-06 ***
## siteUmU      9124.39    561.20  16.259 < 2e-16 ***
## bmi         -34.31     17.98   -1.908  0.0564 .
## icv         2226.66     86.68  25.689 < 2e-16 ***
## ---
## Signif. codes:  0 '***' 0.001 '**' 0.01 '*' 0.05 '.' 0.1 ' ' 1
##
## Approximate significance of smooth terms:
##           edf Ref.df    F  p-value
## s(bl_age)      5.409  5.409 43.748 < 2e-16 ***
## s(bl_age):sleep_z 2.000  2.000  0.890 0.410711
## s(bl_age):time  4.664  4.664  9.238 < 2e-16 ***
## s(sleep_z):time  1.000  1.000 12.661 0.000377 ***
## ---
## Signif. codes:  0 '***' 0.001 '**' 0.01 '*' 0.05 '.' 0.1 ' ' 1
##
## R-sq.(adj) =  0.353
## lmer.REML = 99975  Scale est. = 1.7288e+06  n = 5384

```

Below are plots of a plot of `s(bl_age)`, `s(bl_age):sleep_z`, `s(bl_age):time`, and `s(sleep_z):time`. For `s(sleep_z):time`, roughly, if we cannot fit a straight line through the confidence bands, there is evidence that the effect of time depends on sleep duration. It is correct that the confidence interval is zero at one point along the axis; this happens because we do not include the main effect.

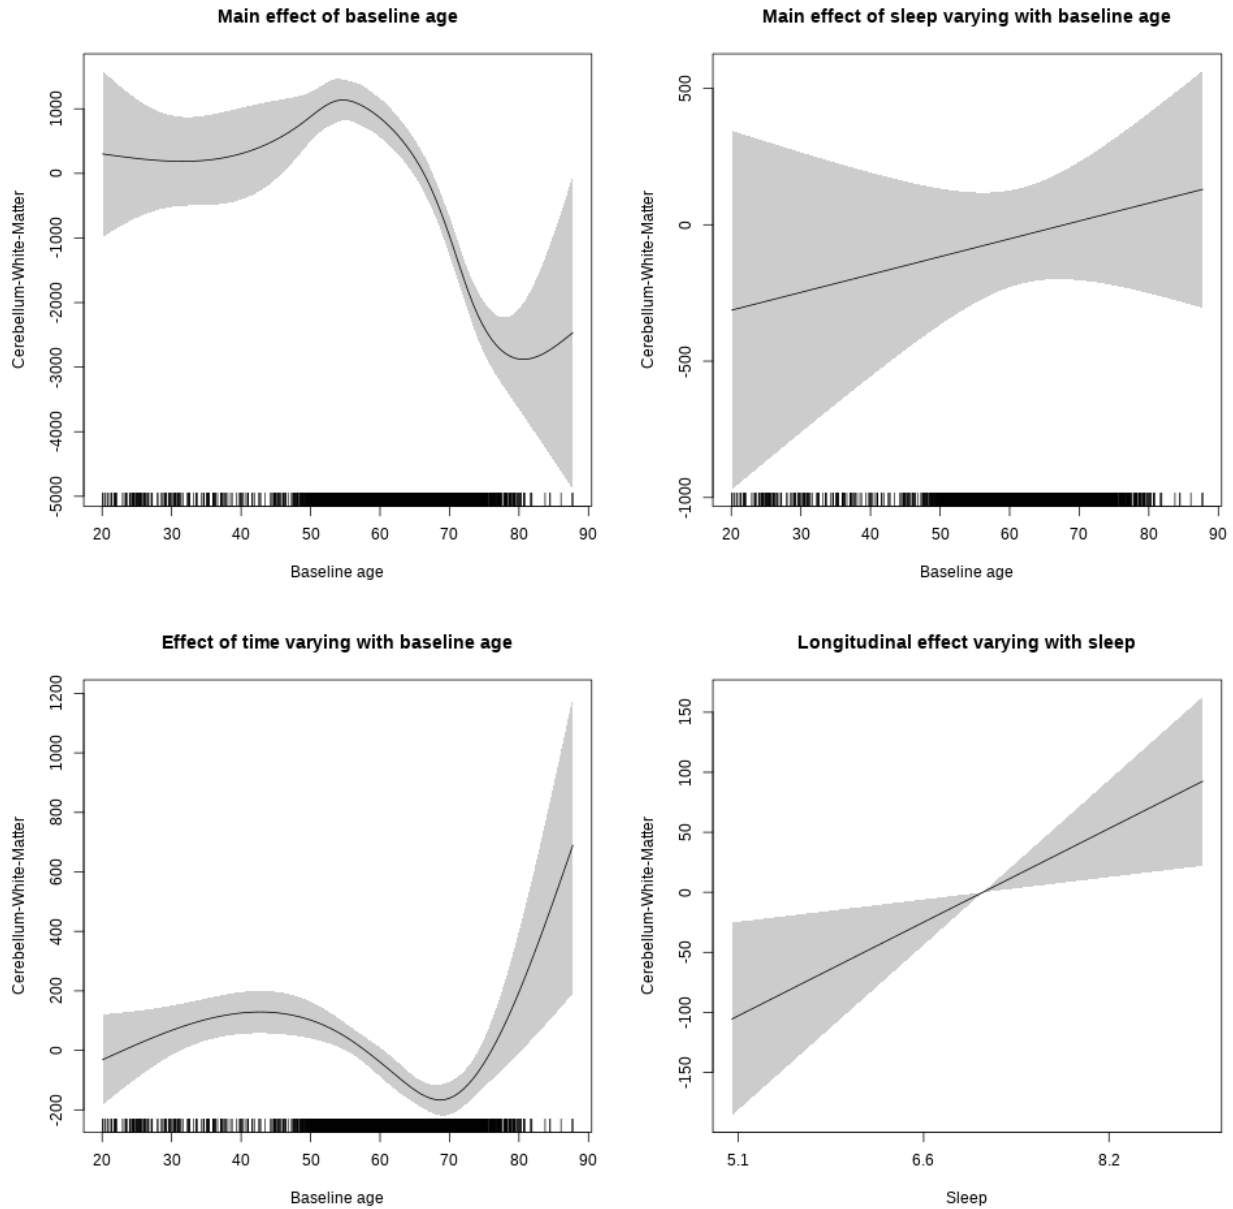

**Restricted to sleep  $\geq 5$  and  $\leq 9$  hours** Below is the row for `s(sleep_z):time` from the model output.

```
## s(sleep_z):time 1.000 1.000 6.906 0.00862 **
```

Below are plots of a plot of `s(bl_age)`, `s(bl_age):sleep_z`, `s(bl_age):time`, and `s(sleep_z):time`. For `s(sleep_z):time`, roughly, if we cannot fit a straight line through the confidence bands, there is evidence that the effect of time depends on sleep duration. It is correct that the confidence interval is zero at one point along the axis; this happens because we do not include the main effect.



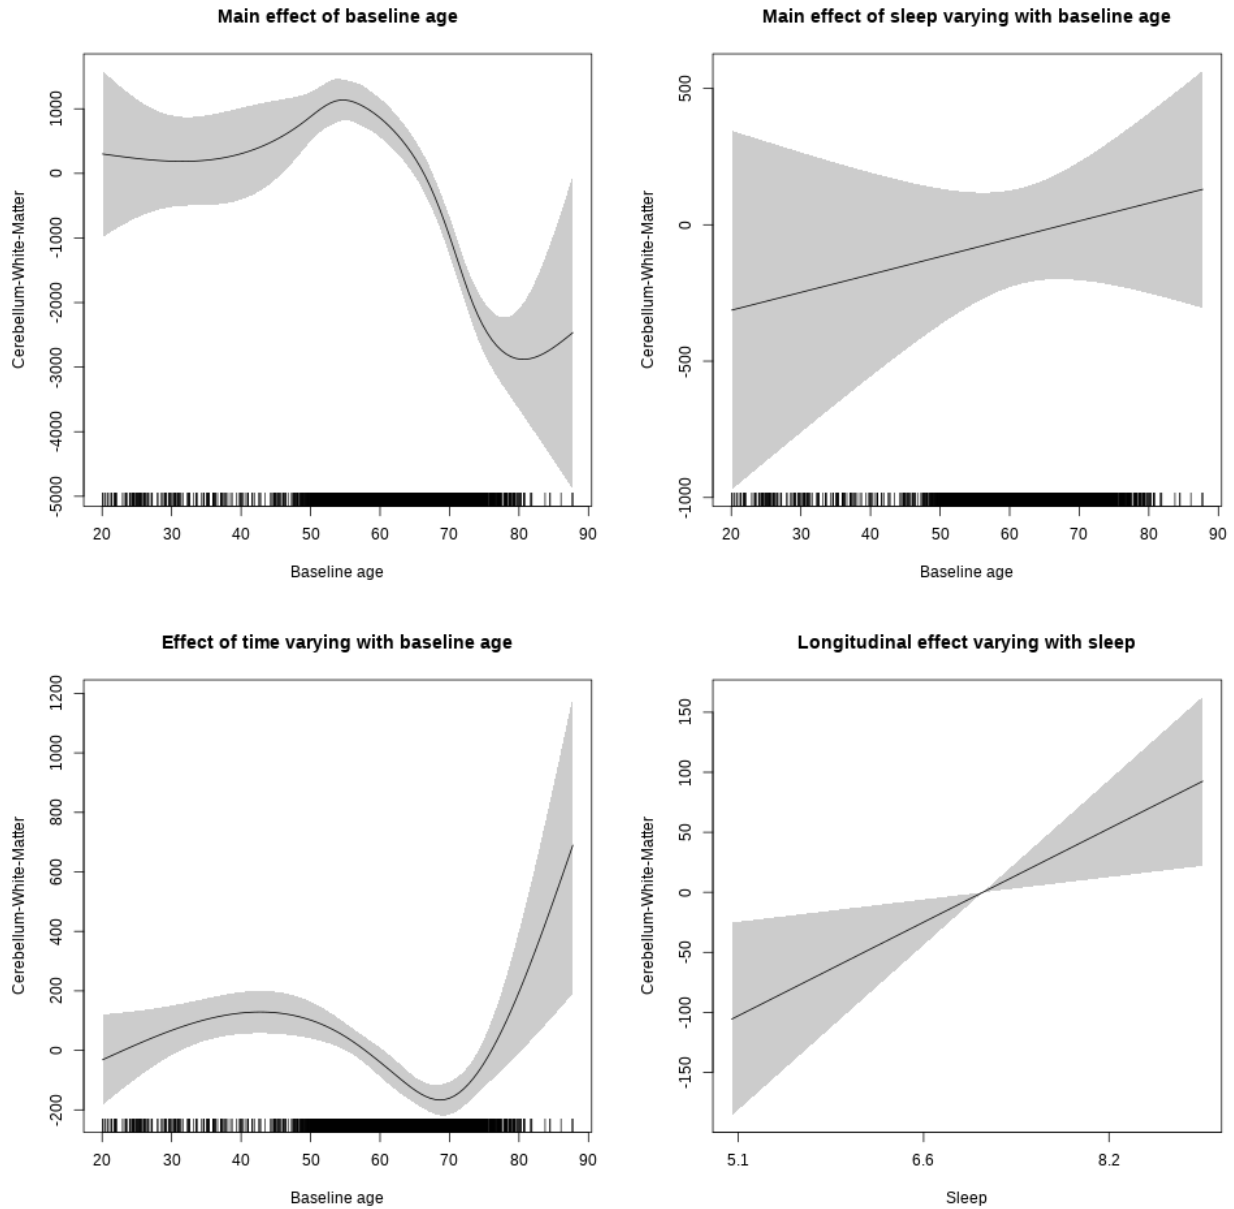

## Controlling for depression

**Full data** Below is the model output. The term `s(sleep_z):time` is probably what we care most about.

```
##
## Family: gaussian
## Link function: identity
##
## Formula:
## value ~ sex + site + depression + icv + s(bl_age, k = 10, bs = "cr") +
##       s(bl_age, by = sleep_z, bs = "cr") + +s(bl_age, by = time,
##       k = 5, bs = "cr") + s(sleep_z, by = time, k = 5, bs = "cr",
##       pc = 0)
```

```

## <environment: 0x5639111c77a8>
##
## Parametric coefficients:
##           Estimate Std. Error t value Pr(>|t|)
## (Intercept) 29741.57    326.25  91.163 < 2e-16 ***
## sexmale     -390.13    170.74  -2.285 0.022355 *
## siteousAvanto -257.15    729.01  -0.353 0.724293
## siteousPrisma -4734.86   1386.69  -3.415 0.000643 ***
## siteousSkyra  2624.65    597.43   4.393 1.14e-05 ***
## siteUCAM     -992.44    396.38  -2.504 0.012316 *
## siteUKB      1604.80    299.59   5.357 8.82e-08 ***
## siteUmU      8679.86    479.58  18.099 < 2e-16 ***
## depression  -531.54    597.29  -0.890 0.373545
## icv          2037.15     83.11  24.512 < 2e-16 ***
## ---
## Signif. codes:  0 '***' 0.001 '**' 0.01 '*' 0.05 '.' 0.1 ' ' 1
##
## Approximate significance of smooth terms:
##           edf Ref.df    F p-value
## s(bl_age)      5.338  5.338 43.680 < 2e-16 ***
## s(bl_age):sleep_z 2.000  2.000  0.014 0.98619
## s(bl_age):time  4.639  4.639  9.912 < 2e-16 ***
## s(sleep_z):time  1.000  1.000  8.763 0.00309 **
## ---
## Signif. codes:  0 '***' 0.001 '**' 0.01 '*' 0.05 '.' 0.1 ' ' 1
##
## R-sq.(adj) =  0.396
## lmer.REML = 1.0493e+05  Scale est. = 1.6926e+06  n = 5651

```

Below are plots of a plot of `s(bl_age)`, `s(bl_age):sleep_z`, `s(bl_age):time`, and `s(sleep_z):time`. For `s(sleep_z):time`, roughly, if we cannot fit a straight line through the confidence bands, there is evidence that the effect of time depends on sleep duration. It is correct that the confidence interval is zero at one point along the axis; this happens because we do not include the main effect.

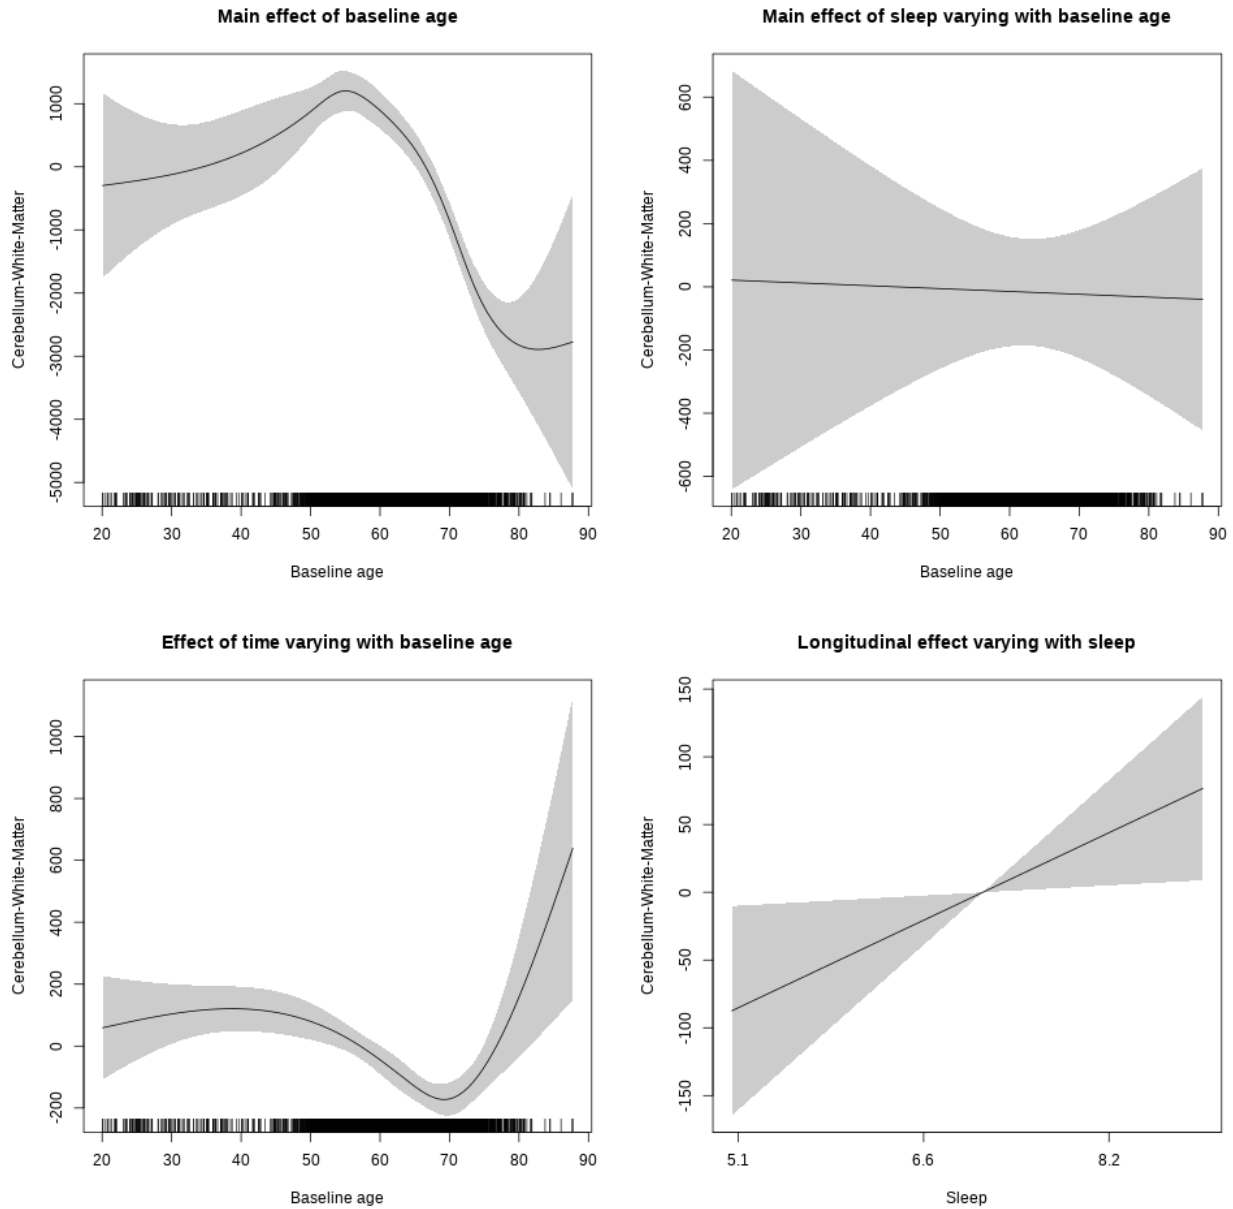

**Restricted to sleep  $\geq 5$  and  $\leq 9$  hours** Below is the row for `s(sleep_z):time` from the model output.

```
## s(sleep_z):time 1.000 1.000 5.120 0.0237 *
```

Below are plots of a plot of `s(bl_age)`, `s(bl_age):sleep_z`, `s(bl_age):time`, and `s(sleep_z):time`. For `s(sleep_z):time`, roughly, if we cannot fit a straight line through the confidence bands, there is evidence that the effect of time depends on sleep duration. It is correct that the confidence interval is zero at one point along the axis; this happens because we do not include the main effect.

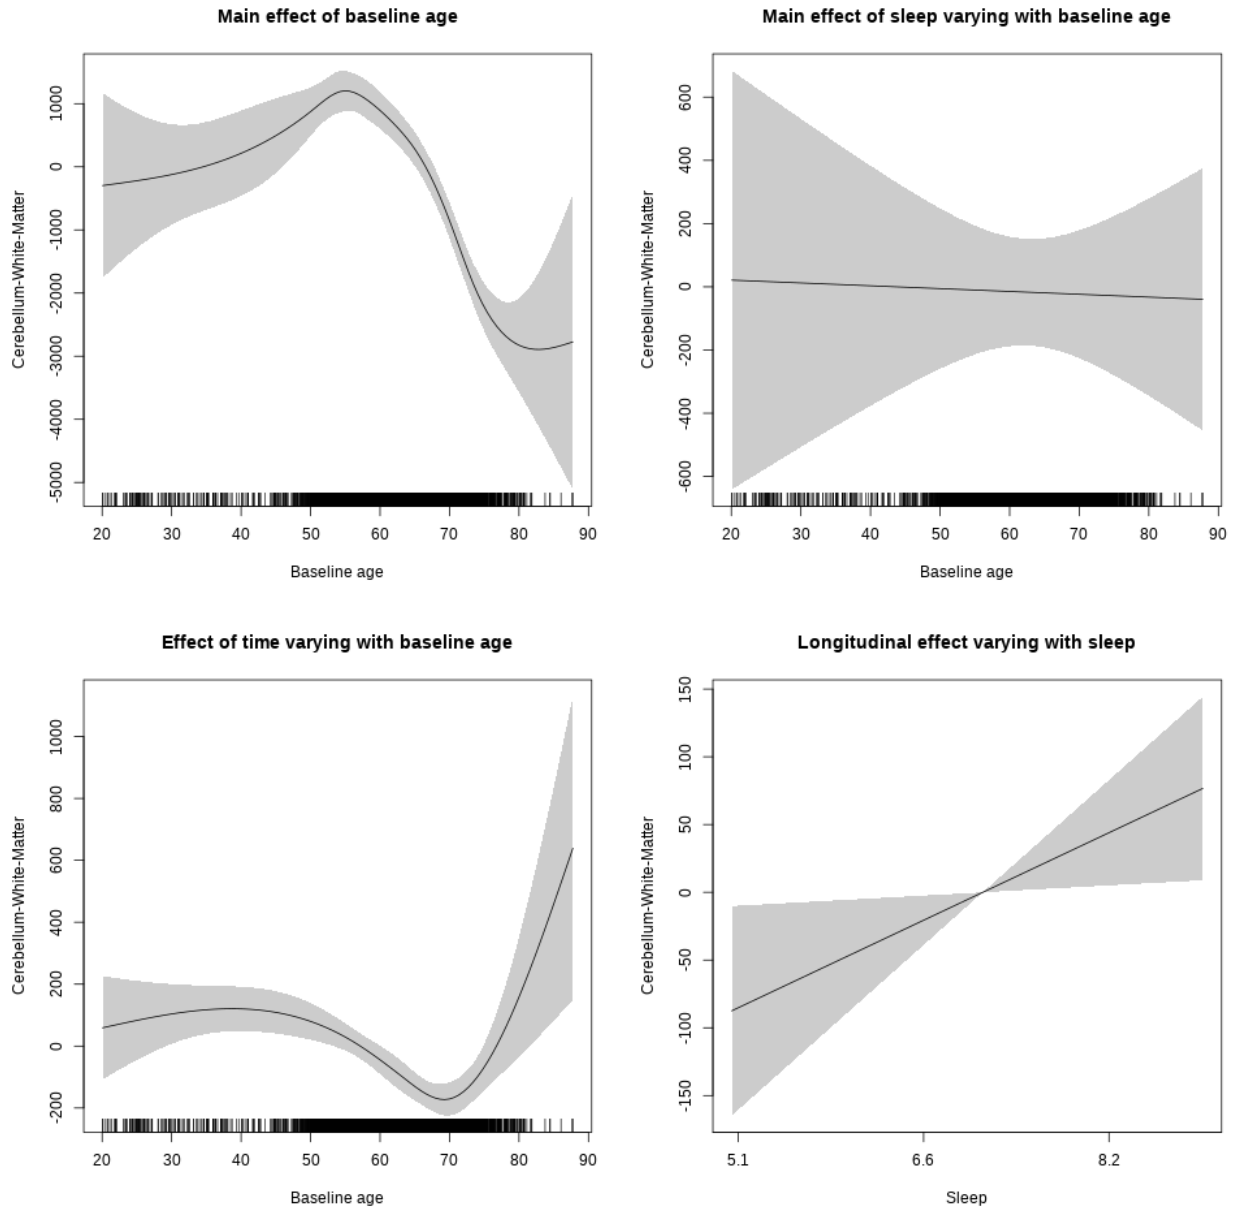

## Controlling for sleep quality

**Full data** Below is the model output. The term `s(sleep_z):time` is probably what we care most about.

```
##
## Family: gaussian
## Link function: identity
##
## Formula:
## value ~ X + s(bl_age, k = 10, bs = "cr") + s(bl_age, by = sleep_z,
##       bs = "cr") + s(bl_age, by = time, k = 5, bs = "cr") + s(sleep_z,
##       by = time, k = 5, bs = "cr", pc = 0)
## <environment: 0x56391180b598>
```

```

##
## Parametric coefficients:
##               Estimate Std. Error t value Pr(>|t|)
## (Intercept)      26425.79    521.22  50.700 < 2e-16 ***
## Xsexmale          2129.31    194.80  10.931 < 2e-16 ***
## XsiteousAvanto    2802.77    499.67   5.609 2.16e-08 ***
## XsiteousPrisma   -1585.63   1072.29  -1.479 0.13929
## XsiteousSkyra     4563.87    502.02   9.091 < 2e-16 ***
## XsiteUB           197.05    788.90   0.250 0.80277
## XsiteUCAM         1609.57    513.07   3.137 0.00172 **
## XsiteUKB          4394.63   1594.29   2.756 0.00587 **
## XsiteUmU         10234.97    570.72  17.934 < 2e-16 ***
## Xukb_dummy:sleep_accel    56.19    123.41   0.455 0.64888
## Xukb_dummy:chronotype   -112.67    162.93  -0.692 0.48928
## Xukb_dummy:dozing        44.23    337.31   0.131 0.89568
## Xukb_dummy:sleeplessness -313.78    210.25  -1.492 0.13567
## Xukb_dummy:snoring       393.56    297.49   1.323 0.18592
## Xukb_dummy:gettingup    -196.69    228.58  -0.860 0.38958
## Xnotukb_dummy:PSQI_Global -131.36     64.45  -2.038 0.04158 *
## ---
## Signif. codes:  0 '***' 0.001 '**' 0.01 '*' 0.05 '.' 0.1 ' ' 1
##
## Approximate significance of smooth terms:
##               edf Ref.df      F p-value
## s(bl_age)      4.837  4.837 36.438 < 2e-16 ***
## s(bl_age):sleep_z 2.000  2.000  1.121  0.326
## s(bl_age):time  4.354  4.354 16.400 < 2e-16 ***
## s(sleep_z):time  1.000  1.000 27.319 8.2e-07 ***
## ---
## Signif. codes:  0 '***' 0.001 '**' 0.01 '*' 0.05 '.' 0.1 ' ' 1
##
## R-sq.(adj) =  0.298
## lmer.REML = 79135 Scale est. = 1.5516e+06 n = 4272

```

Below are plots of a plot of  $s(\text{bl\_age})$ ,  $s(\text{bl\_age}):\text{sleep\_z}$ ,  $s(\text{bl\_age}):\text{time}$ , and  $s(\text{sleep\_z}):\text{time}$ . For  $s(\text{sleep\_z}):\text{time}$ , roughly, if we cannot fit a straight line through the confidence bands, there is evidence that the effect of time depends on sleep duration. It is correct that that confidence interval is zero at one point along the axis; this happens because we do not include the main effect.

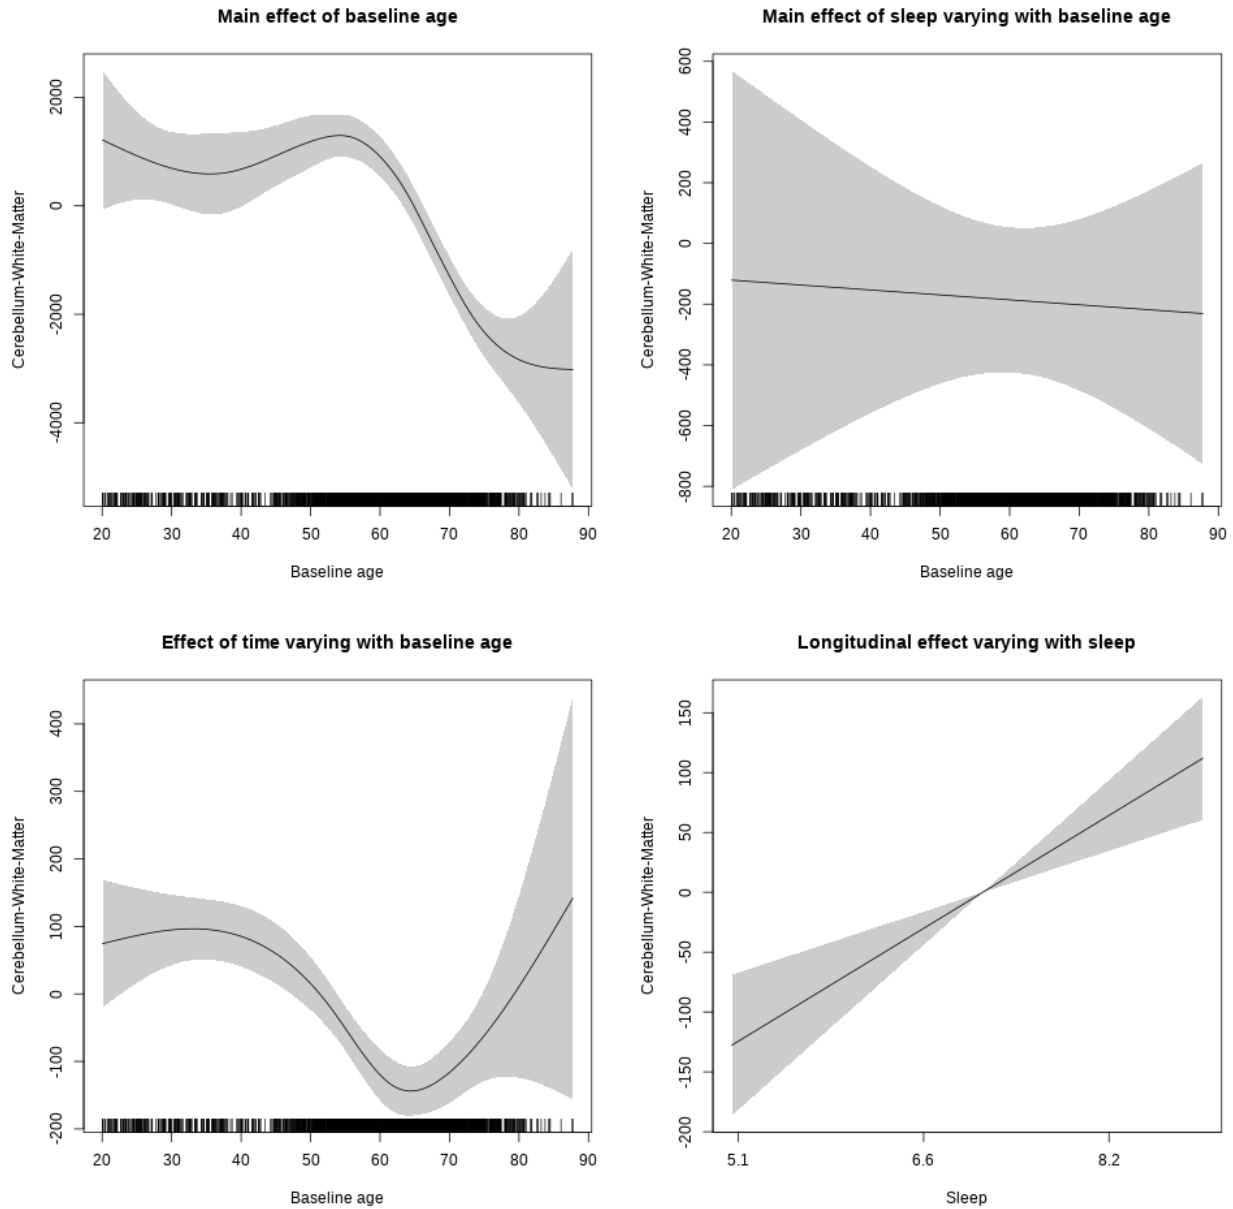

**Restricted to sleep  $\geq 5$  and  $\leq 9$  hours** Below is the row for `s(sleep_z):time` from the model output.

```
## s(sleep_z):time 1.000 1.000 18.905 1.42e-05 ***
```

Below are plots of a plot of `s(bl_age)`, `s(bl_age):sleep_z`, `s(bl_age):time`, and `s(sleep_z):time`. For `s(sleep_z):time`, roughly, if we cannot fit a straight line through the confidence bands, there is evidence that the effect of time depends on sleep duration. It is correct that the confidence interval is zero at one point along the axis; this happens because we do not include the main effect.

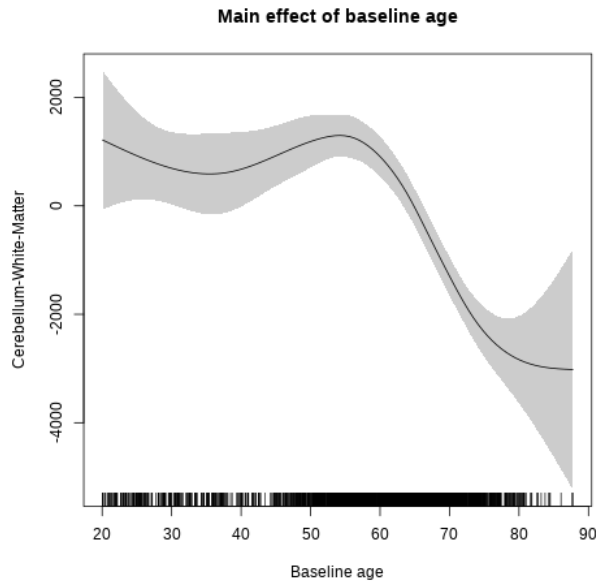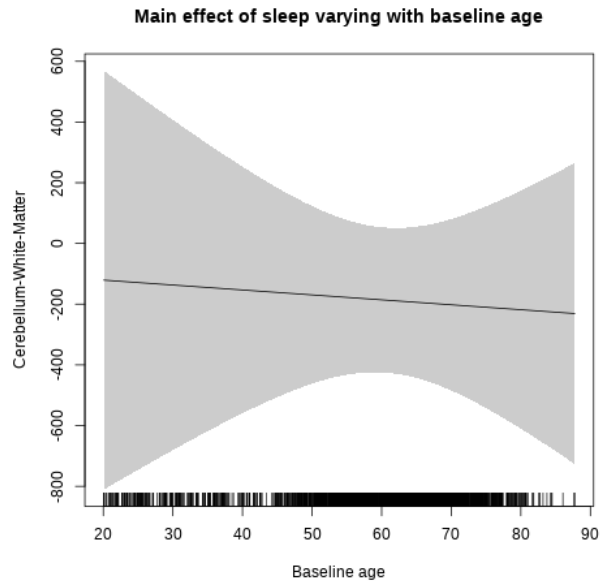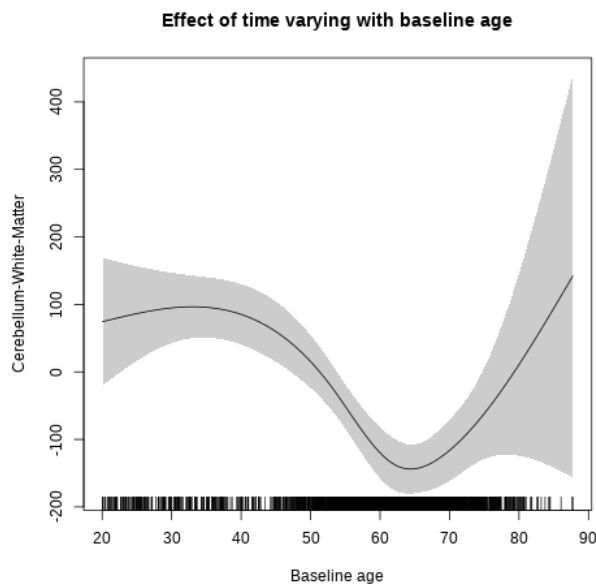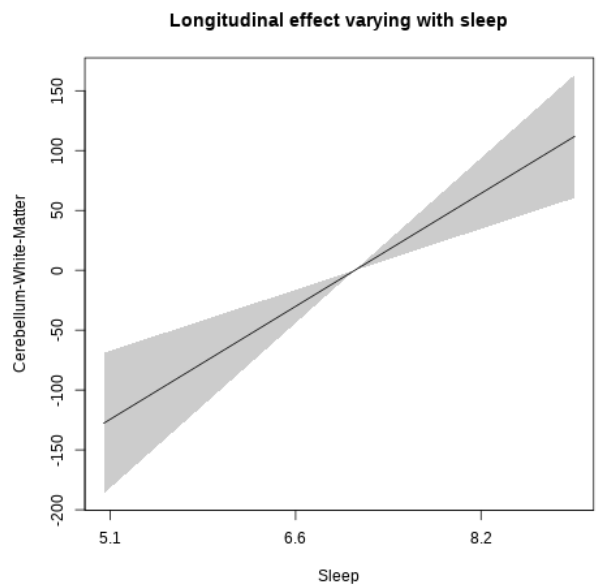

## CerebralWhiteMatterVol

### Main analysis

**Full data** Below is the model output. The term `s(sleep_z):time` is probably what we care most about.

```
##
## Family: gaussian
## Link function: identity
##
## Formula:
## value ~ sex + site + icv + s(bl_age, k = 10, bs = "cr") + s(bl_age,
##   by = sleep_z, bs = "cr") + +s(bl_age, by = time, k = 5, bs = "cr") +
```

```

##      s(sleep_z, by = time, k = 5, bs = "cr", pc = 0)
## <environment: 0x563910f09c80>
##
## Parametric coefficients:
##              Estimate Std. Error t value Pr(>|t|)
## (Intercept)  500685.2    2298.4   217.84 <2e-16 ***
## sexmale      12007.5     1180.8    10.17 <2e-16 ***
## siteousAvanto -51917.3    2818.7   -18.42 <2e-16 ***
## siteousPrisma -85972.2    5802.6   -14.82 <2e-16 ***
## siteousSkyra  -57172.6    2747.6   -20.81 <2e-16 ***
## siteUB       -62997.0    5392.4   -11.68 <2e-16 ***
## siteUCAM     -61480.7    2921.8   -21.04 <2e-16 ***
## siteUKB      -25078.6    2206.5   -11.37 <2e-16 ***
## siteUmU      -36533.6    3336.2   -10.95 <2e-16 ***
## icv          41090.0     549.3    74.81 <2e-16 ***
## ---
## Signif. codes:  0 '***' 0.001 '**' 0.01 '*' 0.05 '.' 0.1 ' ' 1
##
## Approximate significance of smooth terms:
##              edf Ref.df      F p-value
## s(bl_age)      5.621  5.621 119.799 <2e-16 ***
## s(bl_age):sleep_z 2.000  2.000   3.165  0.0422 *
## s(bl_age):time  4.787  4.787 188.311 <2e-16 ***
## s(sleep_z):time  3.387  3.387   1.841  0.1046
## ---
## Signif. codes:  0 '***' 0.001 '**' 0.01 '*' 0.05 '.' 0.1 ' ' 1
##
## R-sq.(adj) =  0.734
## lmer.REML = 1.8123e+05  Scale est. = 4.2549e+07  n = 8150

```

Below are plots of a plot of  $s(\text{bl\_age})$ ,  $s(\text{bl\_age}):\text{sleep\_z}$ ,  $s(\text{bl\_age}):\text{time}$ , and  $s(\text{sleep\_z}):\text{time}$ . For  $s(\text{sleep\_z}):\text{time}$ , roughly, if we cannot fit a straight line through the confidence bands, there is evidence that the effect of time depends on sleep duration. It is correct that the confidence interval is zero at one point along the axis; this happens because we do not include the main effect.



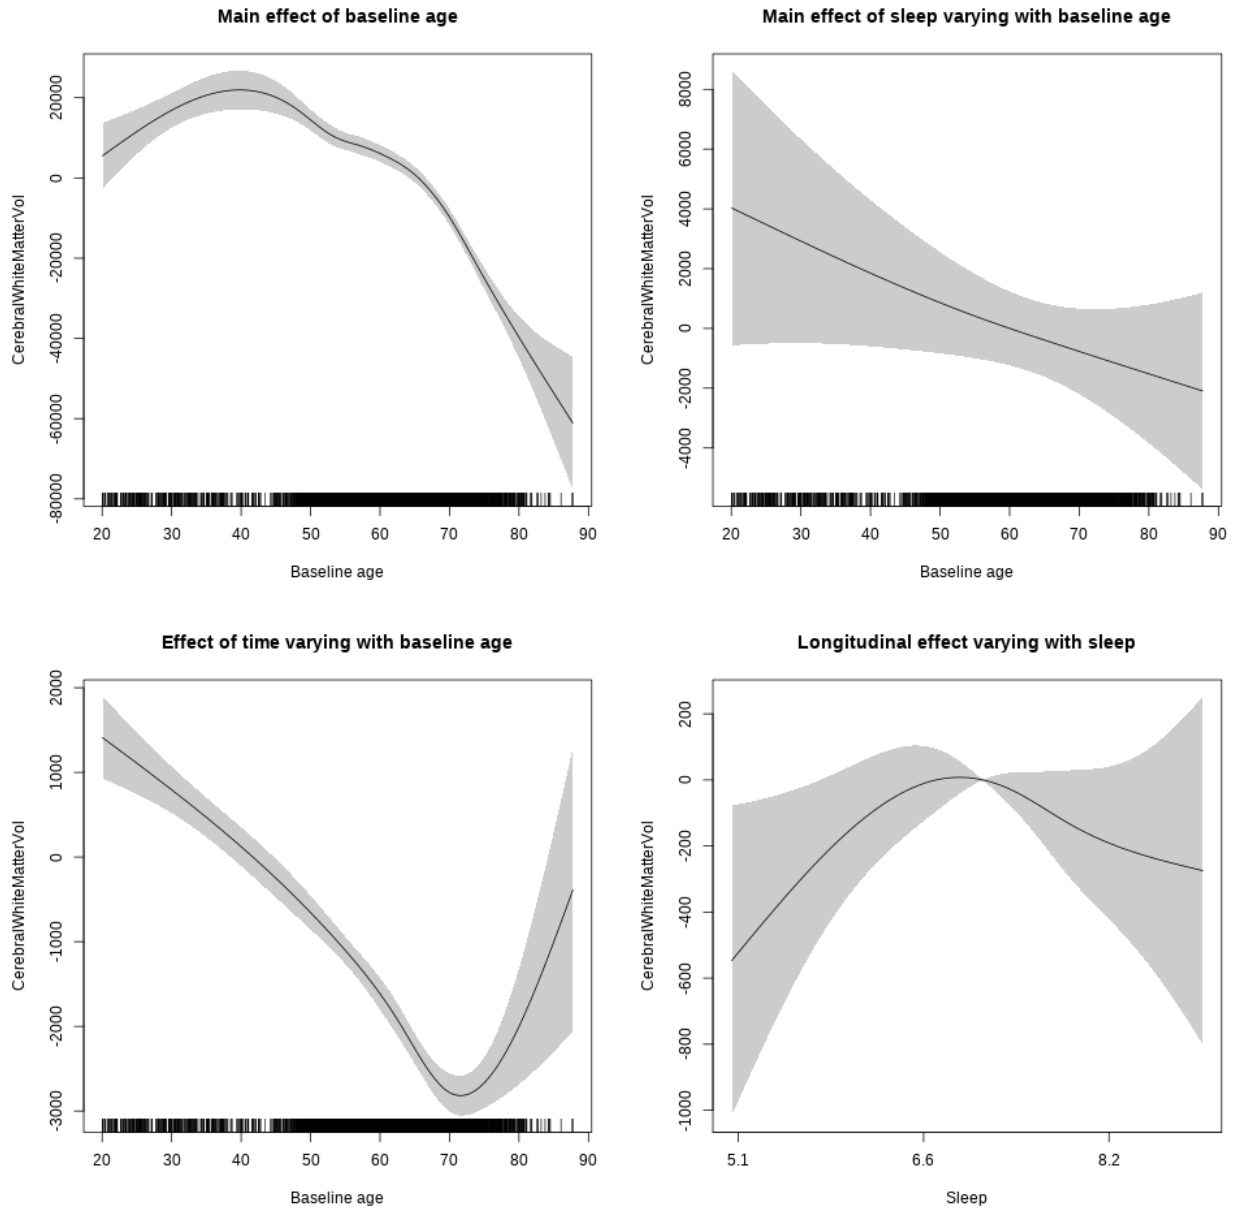

**Restricted to sleep  $\geq 5$  and  $\leq 9$  hours** Below is the row for `s(sleep_z):time` from the model output.

```
## s(sleep_z):time  2.354  2.354  2.626  0.0605 .
```

Below are plots of a plot of `s(bl_age)`, `s(bl_age):sleep_z`, `s(bl_age):time`, and `s(sleep_z):time`. For `s(sleep_z):time`, roughly, if we cannot fit a straight line through the confidence bands, there is evidence that the effect of time depends on sleep duration. It is correct that the confidence interval is zero at one point along the axis; this happens because we do not include the main effect.



### Controlling for socioeconomic status

**Full data** Below is the model output. The term `s(sleep_z):time` is probably what we care most about.

```
##
## Family: gaussian
## Link function: identity
##
## Formula:
## value ~ sex + site + income_scaled + education_scaled + icv +
##       s(bl_age, k = 10, bs = "cr") + s(bl_age, by = sleep_z, bs = "cr") +
##       +s(bl_age, by = time, k = 5, bs = "cr") + s(sleep_z, by = time,
##       k = 5, bs = "cr", pc = 0)
```

```

## <environment: 0x5639172bd690>
##
## Parametric coefficients:
##           Estimate Std. Error t value Pr(>|t|)
## (Intercept)  511313.0    5410.8  94.499 < 2e-16 ***
## sexmale      9969.7     1469.4   6.785 1.31e-11 ***
## siteousAvanto -70555.3    5787.2 -12.192 < 2e-16 ***
## siteousPrisma -116932.2   9854.9 -11.865 < 2e-16 ***
## siteousSkyra  -70122.7   5528.5 -12.684 < 2e-16 ***
## siteUKB      -38206.1   5140.9  -7.432 1.27e-13 ***
## income_scaled  3937.9     1911.8   2.060  0.0395 *
## education_scaled  730.7     2109.2   0.346  0.7290
## icv          44060.8     705.3  62.474 < 2e-16 ***
## ---
## Signif. codes:  0 '***' 0.001 '**' 0.01 '*' 0.05 '.' 0.1 ' ' 1
##
## Approximate significance of smooth terms:
##           edf Ref.df    F p-value
## s(bl_age)      4.383  4.383 54.307 <2e-16 ***
## s(bl_age):sleep_z 2.000  2.000  1.247  0.287
## s(bl_age):time  4.696  4.696 73.072 <2e-16 ***
## s(sleep_z):time  3.495  3.495  1.080  0.221
## ---
## Signif. codes:  0 '***' 0.001 '**' 0.01 '*' 0.05 '.' 0.1 ' ' 1
##
## R-sq.(adj) =  0.748
## lmer.REML = 1.0345e+05  Scale est. = 4.2974e+07  n = 4652

```

Below are plots of a plot of  $s(\text{bl\_age})$ ,  $s(\text{bl\_age}):\text{sleep\_z}$ ,  $s(\text{bl\_age}):\text{time}$ , and  $s(\text{sleep\_z}):\text{time}$ . For  $s(\text{sleep\_z}):\text{time}$ , roughly, if we cannot fit a straight line through the confidence bands, there is evidence that the effect of time depends on sleep duration. It is correct that the confidence interval is zero at one point along the axis; this happens because we do not include the main effect.

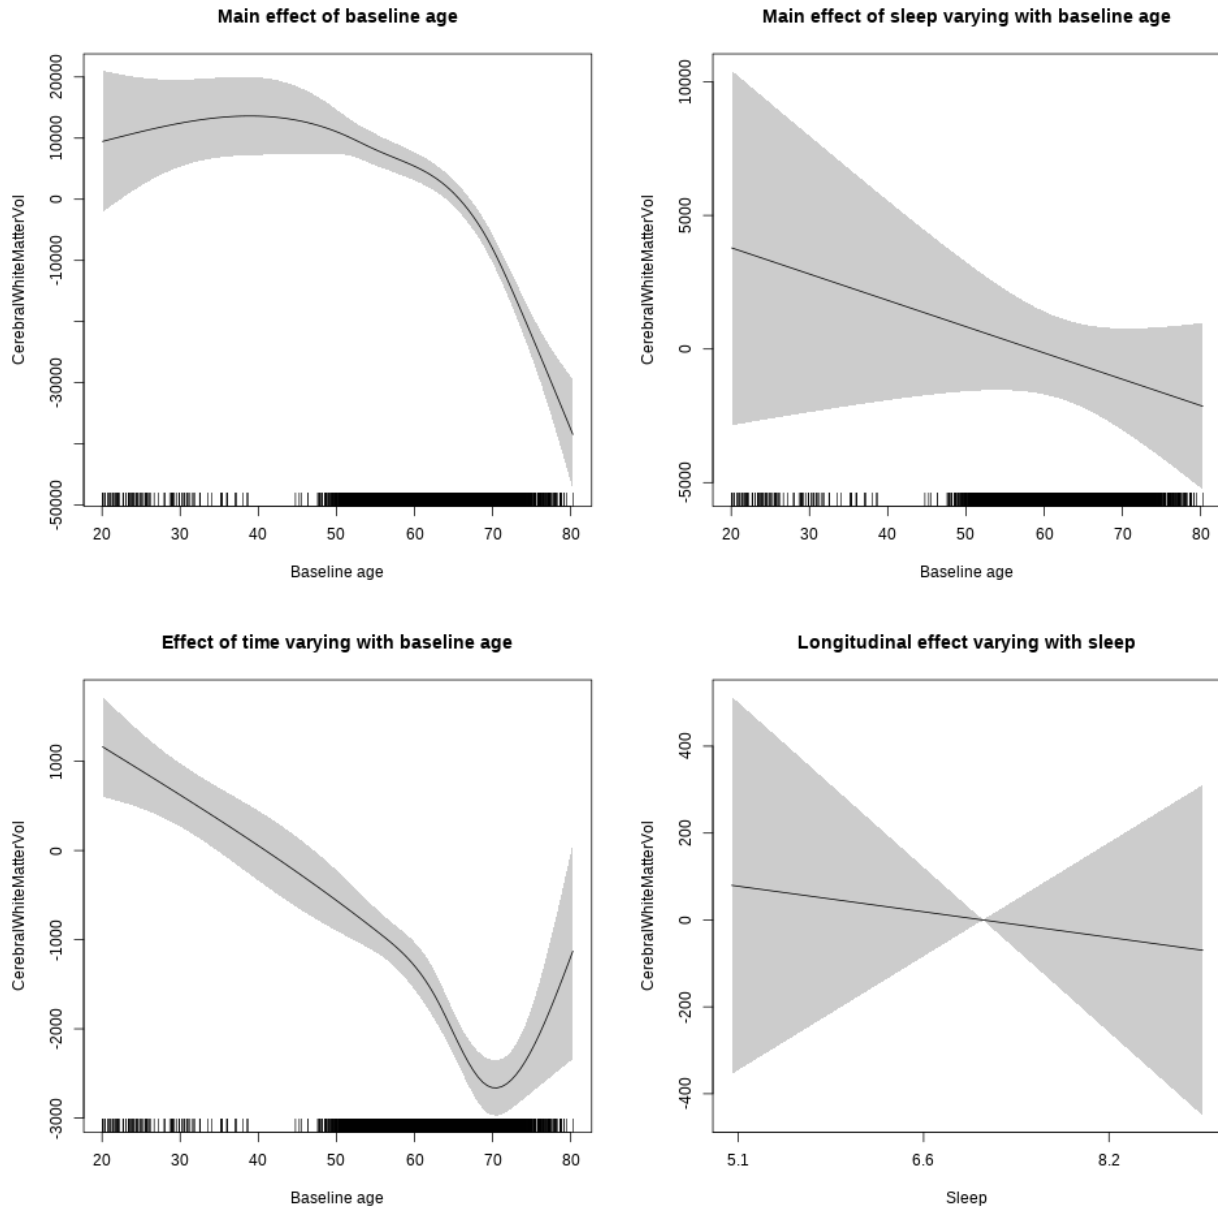

**Restricted to sleep  $\geq 5$  and  $\leq 9$  hours** Below is the row for `s(sleep_z):time` from the model output.

```
## s(sleep_z):time  1.000  1.000  0.135  0.714
```

Below are plots of a plot of `s(bl_age)`, `s(bl_age):sleep_z`, `s(bl_age):time`, and `s(sleep_z):time`. For `s(sleep_z):time`, roughly, if we cannot fit a straight line through the confidence bands, there is evidence that the effect of time depends on sleep duration. It is correct that the confidence interval is zero at one point along the axis; this happens because we do not include the main effect.



## Controlling for BMI

**Full data** Below is the model output. The term `s(sleep_z):time` is probably what we care most about.

```
##
## Family: gaussian
## Link function: identity
##
## Formula:
## value ~ sex + site + bmi + icv + s(bl_age, k = 10, bs = "cr") +
##   s(bl_age, by = sleep_z, bs = "cr") + s(bl_age, by = time,
##   k = 5, bs = "cr") + s(sleep_z, by = time, k = 5, bs = "cr",
##   pc = 0)
```

```

## <environment: 0x5639112ecfd0>
##
## Parametric coefficients:
##           Estimate Std. Error t value Pr(>|t|)
## (Intercept) 464975.4    4691.2  99.118 < 2e-16 ***
## sexmale      11118.2    1352.9   8.218 2.57e-16 ***
## siteousPrisma -34840.0    5244.5  -6.643 3.37e-11 ***
## siteousSkyra  -2191.6    1686.2  -1.300  0.1938
## siteUCAM     -7163.1    3494.2  -2.050  0.0404 *
## siteUKB      25523.6    3200.6   7.975 1.85e-15 ***
## siteUmU      19006.5    4024.6   4.723 2.39e-06 ***
## bmi          -610.6     141.7  -4.309 1.67e-05 ***
## icv          43913.1     649.3  67.635 < 2e-16 ***
## ---
## Signif. codes:  0 '***' 0.001 '**' 0.01 '*' 0.05 '.' 0.1 ' ' 1
##
## Approximate significance of smooth terms:
##           edf Ref.df      F p-value
## s(bl_age)      5.032  5.032 82.126 <2e-16 ***
## s(bl_age):sleep_z 2.000  2.000  0.315  0.730
## s(bl_age):time  4.791  4.791 139.462 <2e-16 ***
## s(sleep_z):time  1.000  1.000  0.245  0.621
## ---
## Signif. codes:  0 '***' 0.001 '**' 0.01 '*' 0.05 '.' 0.1 ' ' 1
##
## R-sq.(adj) =  0.753
## lmer.REML = 1.2026e+05  Scale est. = 4.1264e+07  n = 5412

```

Below are plots of a plot of  $s(\text{bl\_age})$ ,  $s(\text{bl\_age}):\text{sleep\_z}$ ,  $s(\text{bl\_age}):\text{time}$ , and  $s(\text{sleep\_z}):\text{time}$ . For  $s(\text{sleep\_z}):\text{time}$ , roughly, if we cannot fit a straight line through the confidence bands, there is evidence that the effect of time depends on sleep duration. It is correct that the confidence interval is zero at one point along the axis; this happens because we do not include the main effect.

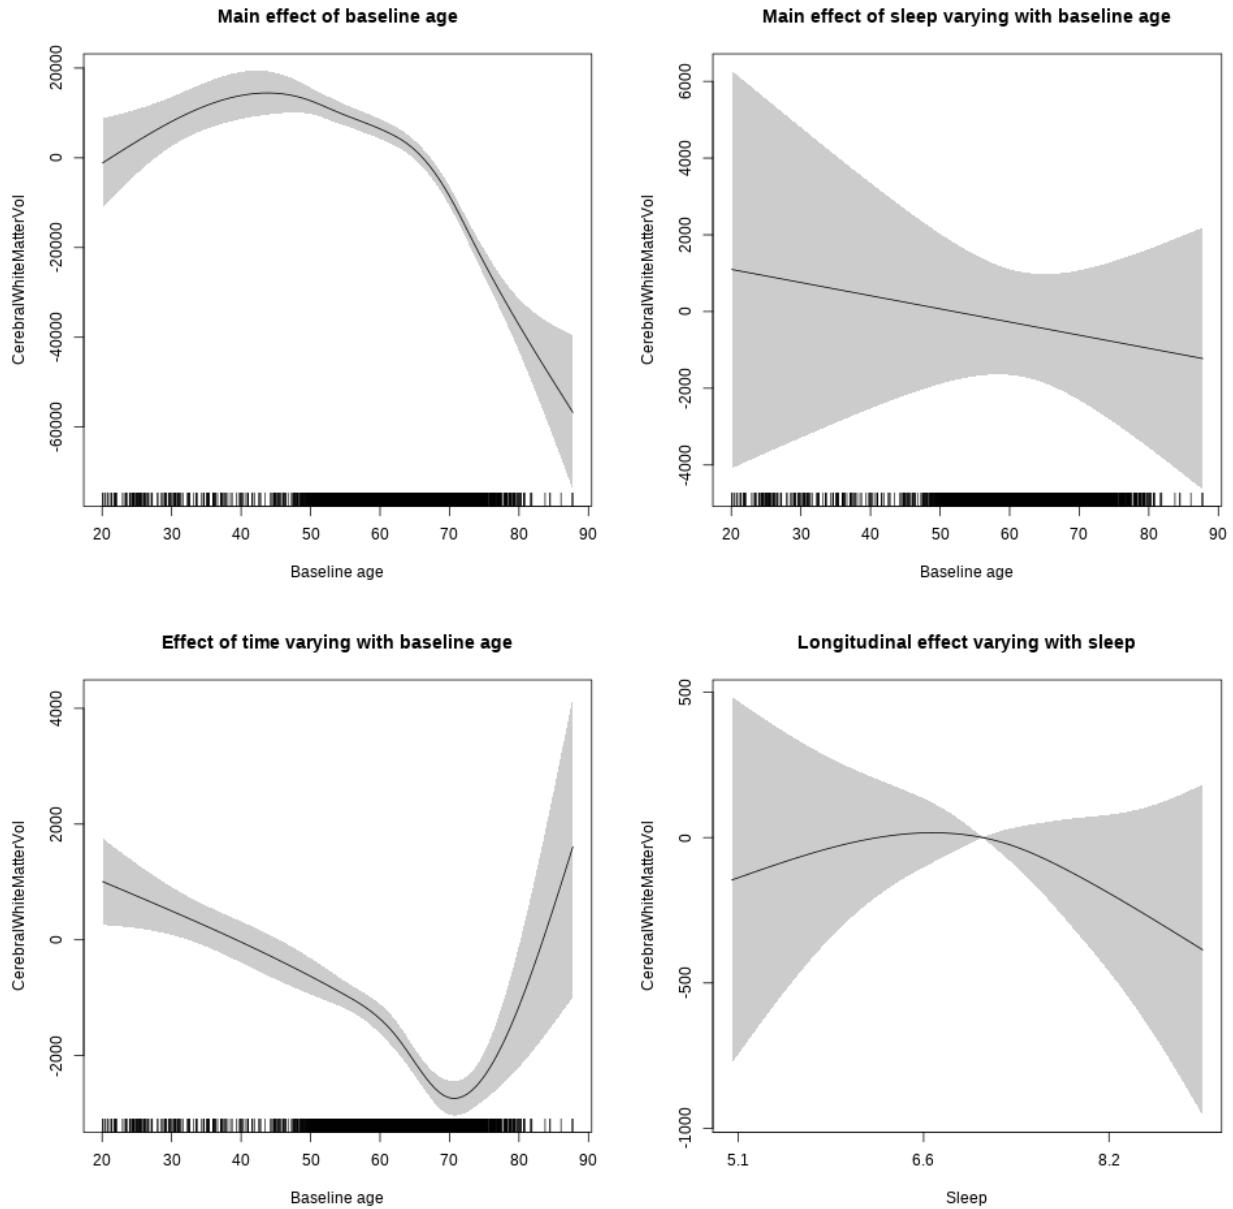

**Restricted to sleep  $\geq 5$  and  $\leq 9$  hours** Below is the row for `s(sleep_z):time` from the model output.

```
## s(sleep_z):time  1.668  1.668  0.626  0.367
```

Below are plots of a plot of `s(bl_age)`, `s(bl_age):sleep_z`, `s(bl_age):time`, and `s(sleep_z):time`. For `s(sleep_z):time`, roughly, if we cannot fit a straight line through the confidence bands, there is evidence that the effect of time depends on sleep duration. It is correct that the confidence interval is zero at one point along the axis; this happens because we do not include the main effect.

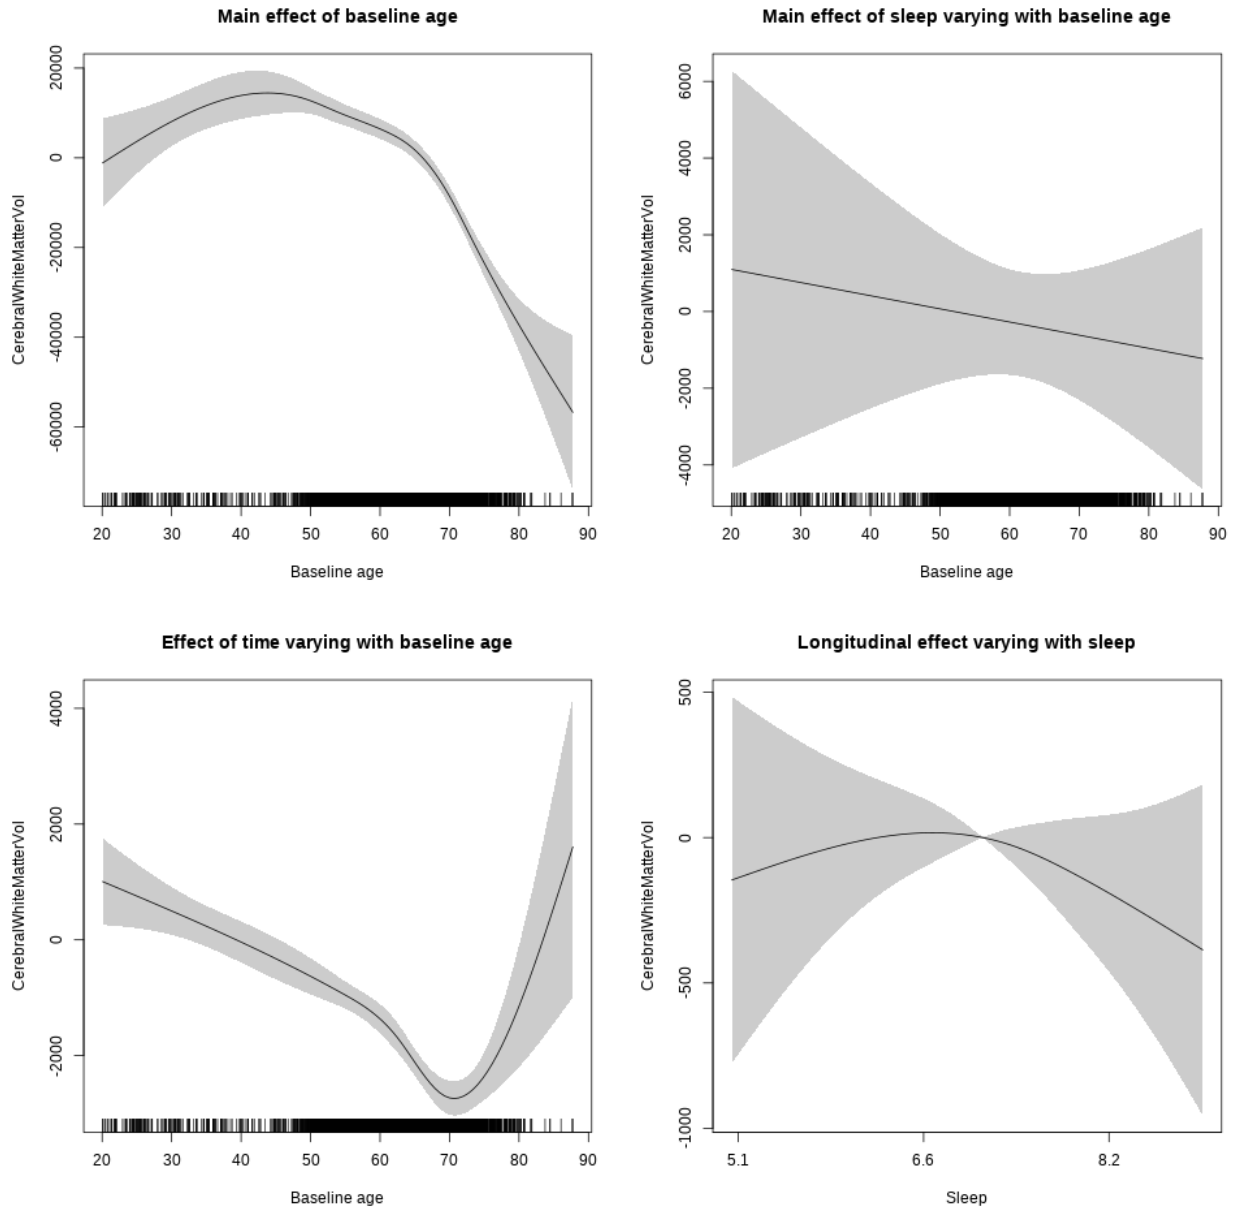

## Controlling for depression

**Full data** Below is the model output. The term `s(sleep_z):time` is probably what we care most about.

```
##
## Family: gaussian
## Link function: identity
##
## Formula:
## value ~ sex + site + depression + icv + s(bl_age, k = 10, bs = "cr") +
##   s(bl_age, by = sleep_z, bs = "cr") + +s(bl_age, by = time,
##     k = 5, bs = "cr") + s(sleep_z, by = time, k = 5, bs = "cr",
##     pc = 0)
```



```

## <environment: 0x563914fe9468>
##
## Parametric coefficients:
##           Estimate Std. Error t value Pr(>|t|)
## (Intercept)  495686.9    2706.5  183.148 < 2e-16 ***
## sexmale      11631.2     1411.3   8.241 < 2e-16 ***
## siteousAvanto -41709.9    5460.9  -7.638 2.58e-14 ***
## siteousPrisma -67067.8    8050.7  -8.331 < 2e-16 ***
## siteousSkyra  -46157.1    5004.7  -9.223 < 2e-16 ***
## siteUCAM     -52841.7    3326.4 -15.886 < 2e-16 ***
## siteUKB      -20828.3    2501.1  -8.328 < 2e-16 ***
## siteUmU      -23545.0    4012.7  -5.868 4.67e-09 ***
## depression   -13258.7    5030.9  -2.635 0.00842 **
## icv          41007.2     659.1  62.217 < 2e-16 ***
## ---
## Signif. codes:  0 '***' 0.001 '**' 0.01 '*' 0.05 '.' 0.1 ' ' 1
##
## Approximate significance of smooth terms:
##           edf Ref.df      F p-value
## s(bl_age)      5.249  5.249  79.734 <2e-16 ***
## s(bl_age):sleep_z 2.000  2.000   1.388  0.25
## s(bl_age):time  4.721  4.721 165.981 <2e-16 ***
## s(sleep_z):time 1.000  1.000   0.219  0.64
## ---
## Signif. codes:  0 '***' 0.001 '**' 0.01 '*' 0.05 '.' 0.1 ' ' 1
##
## R-sq.(adj) = 0.722
## lmer.REML = 1.2658e+05 Scale est. = 4.056e+07 n = 5679

```

Below are plots of a plot of `s(bl_age)`, `s(bl_age):sleep_z`, `s(bl_age):time`, and `s(sleep_z):time`. For `s(sleep_z):time`, roughly, if we cannot fit a straight line through the confidence bands, there is evidence that the effect of time depends on sleep duration. It is correct that the confidence interval is zero at one point along the axis; this happens because we do not include the main effect.

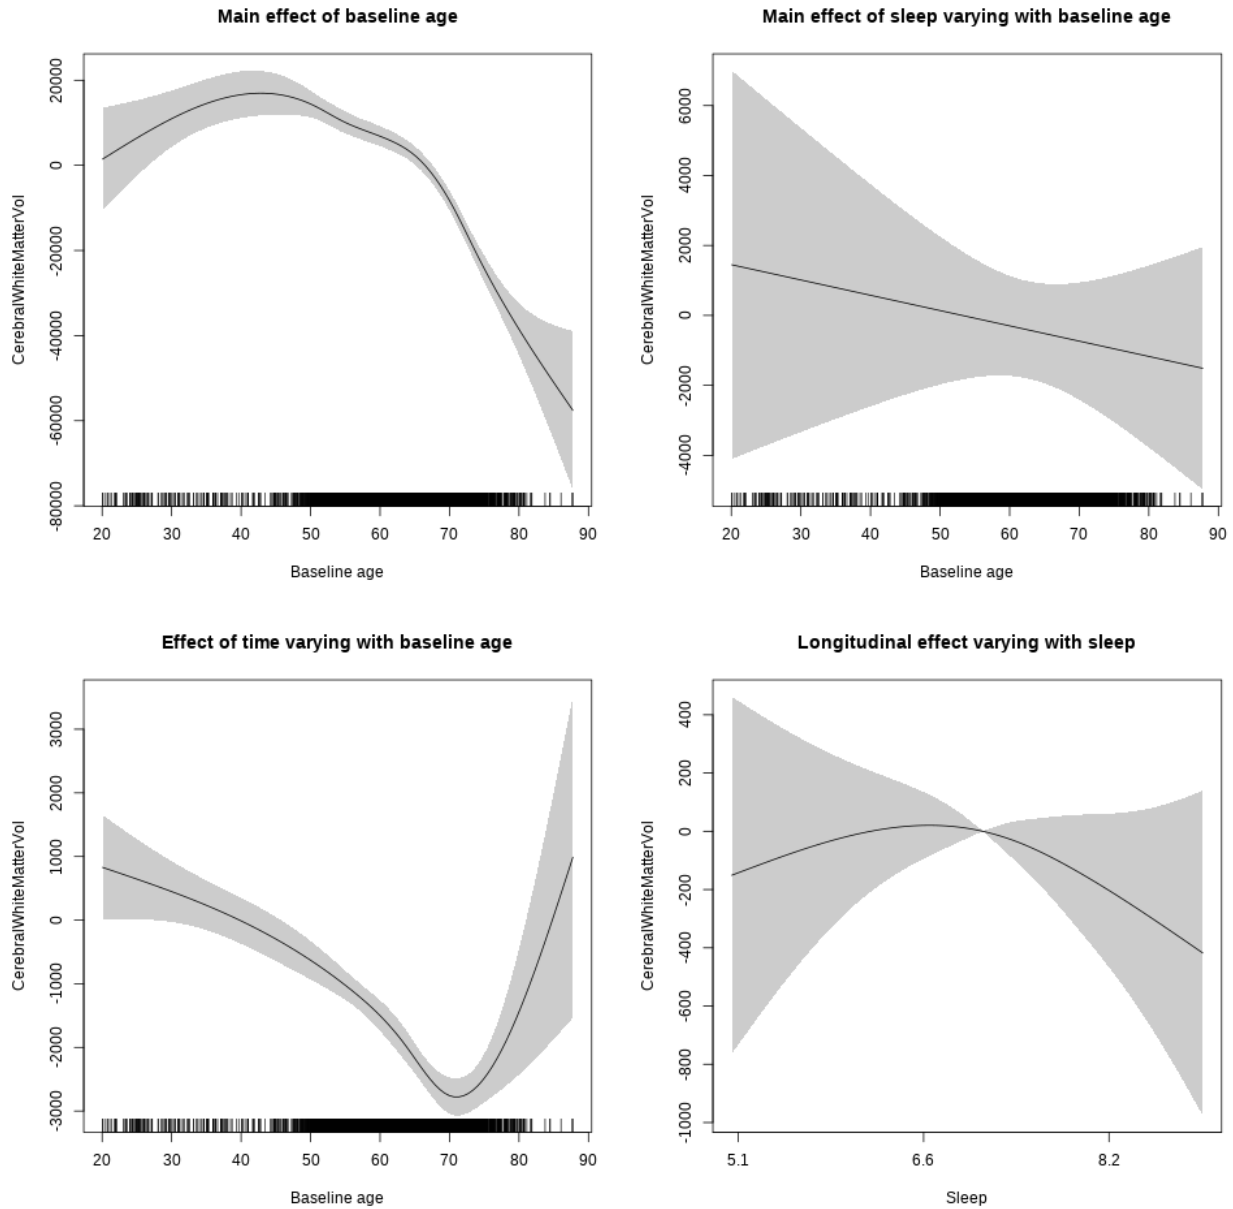

**Restricted to sleep  $\geq 5$  and  $\leq 9$  hours** Below is the row for `s(sleep_z):time` from the model output.

```
## s(sleep_z):time  1.725  1.725  0.828  0.292
```

Below are plots of a plot of `s(bl_age)`, `s(bl_age):sleep_z`, `s(bl_age):time`, and `s(sleep_z):time`. For `s(sleep_z):time`, roughly, if we cannot fit a straight line through the confidence bands, there is evidence that the effect of time depends on sleep duration. It is correct that the confidence interval is zero at one point along the axis; this happens because we do not include the main effect.

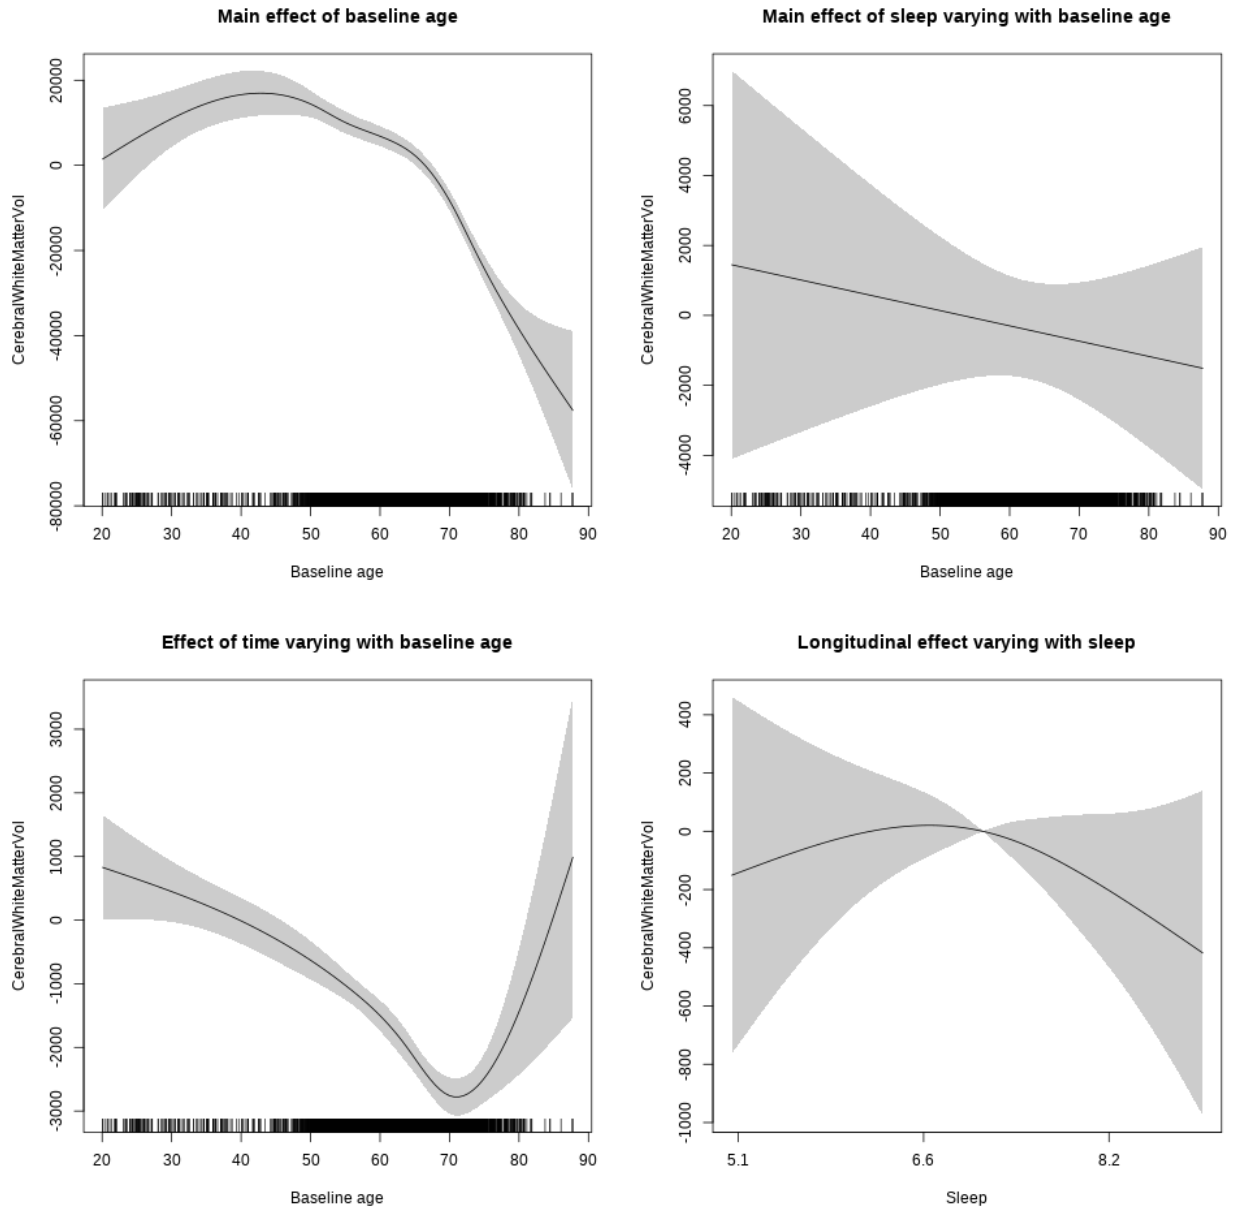

### Controlling for sleep quality

**Full data** Below is the model output. The term `s(sleep_z):time` is probably what we care most about.

```
##
## Family: gaussian
## Link function: identity
##
## Formula:
## value ~ X + s(bl_age, k = 10, bs = "cr") + s(bl_age, by = sleep_z,
##       bs = "cr") + s(bl_age, by = time, k = 5, bs = "cr") + s(sleep_z,
##       by = time, k = 5, bs = "cr", pc = 0)
## <environment: 0x563910f87cd8>
```

```

##
## Parametric coefficients:
##              Estimate Std. Error t value Pr(>|t|)
## (Intercept)    418071.7     6006.6  69.602 < 2e-16 ***
## Xsexmale       58565.1     2246.7  26.067 < 2e-16 ***
## XsiteousAvanto 35350.7     5727.5   6.172 7.37e-10 ***
## XsiteousPrisma 21091.3     7609.7   2.772 0.00560 **
## XsiteousSkyra  15606.1     5733.3   2.722 0.00651 **
## XsiteUB        -8796.7     9136.3  -0.963 0.33569
## XsiteUCAM      10377.3     5900.2   1.759 0.07868 .
## XsiteUKB       6181.6    18289.0   0.338 0.73538
## XsiteUmU       14898.6     6538.8   2.279 0.02275 *
## Xukb_dummy:sleep_accel 1601.4     1411.3   1.135 0.25655
## Xukb_dummy:chronotype 2423.4     1879.2   1.290 0.19726
## Xukb_dummy:dozing 2443.3     3883.3   0.629 0.52925
## Xukb_dummy:sleeplessness -4725.1     2421.0  -1.952 0.05104 .
## Xukb_dummy:snoring 3731.6     3427.5   1.089 0.27634
## Xukb_dummy:gettingup 5389.2     2632.0   2.048 0.04067 *
## Xnotukb_dummy:PSQI_Global -1245.3     744.3  -1.673 0.09436 .
## ---
## Signif. codes:  0 '***' 0.001 '**' 0.01 '*' 0.05 '.' 0.1 ' ' 1
##
## Approximate significance of smooth terms:
##              edf Ref.df      F p-value
## s(bl_age)      3.741  3.741  52.982 <2e-16 ***
## s(bl_age):sleep_z 2.000  2.000   2.270  0.103
## s(bl_age):time  4.655  4.655 239.556 <2e-16 ***
## s(sleep_z):time 1.000  1.000   0.908  0.341
## ---
## Signif. codes:  0 '***' 0.001 '**' 0.01 '*' 0.05 '.' 0.1 ' ' 1
##
## R-sq.(adj) =  0.371
## lmer.REML = 96673  Scale est. = 4.207e+07  n = 4286

```

Below are plots of a plot of  $s(\text{bl\_age})$ ,  $s(\text{bl\_age}):\text{sleep\_z}$ ,  $s(\text{bl\_age}):\text{time}$ , and  $s(\text{sleep\_z}):\text{time}$ . For  $s(\text{sleep\_z}):\text{time}$ , roughly, if we cannot fit a straight line through the confidence bands, there is evidence that the effect of time depends on sleep duration. It is correct that the confidence interval is zero at one point along the axis; this happens because we do not include the main effect.

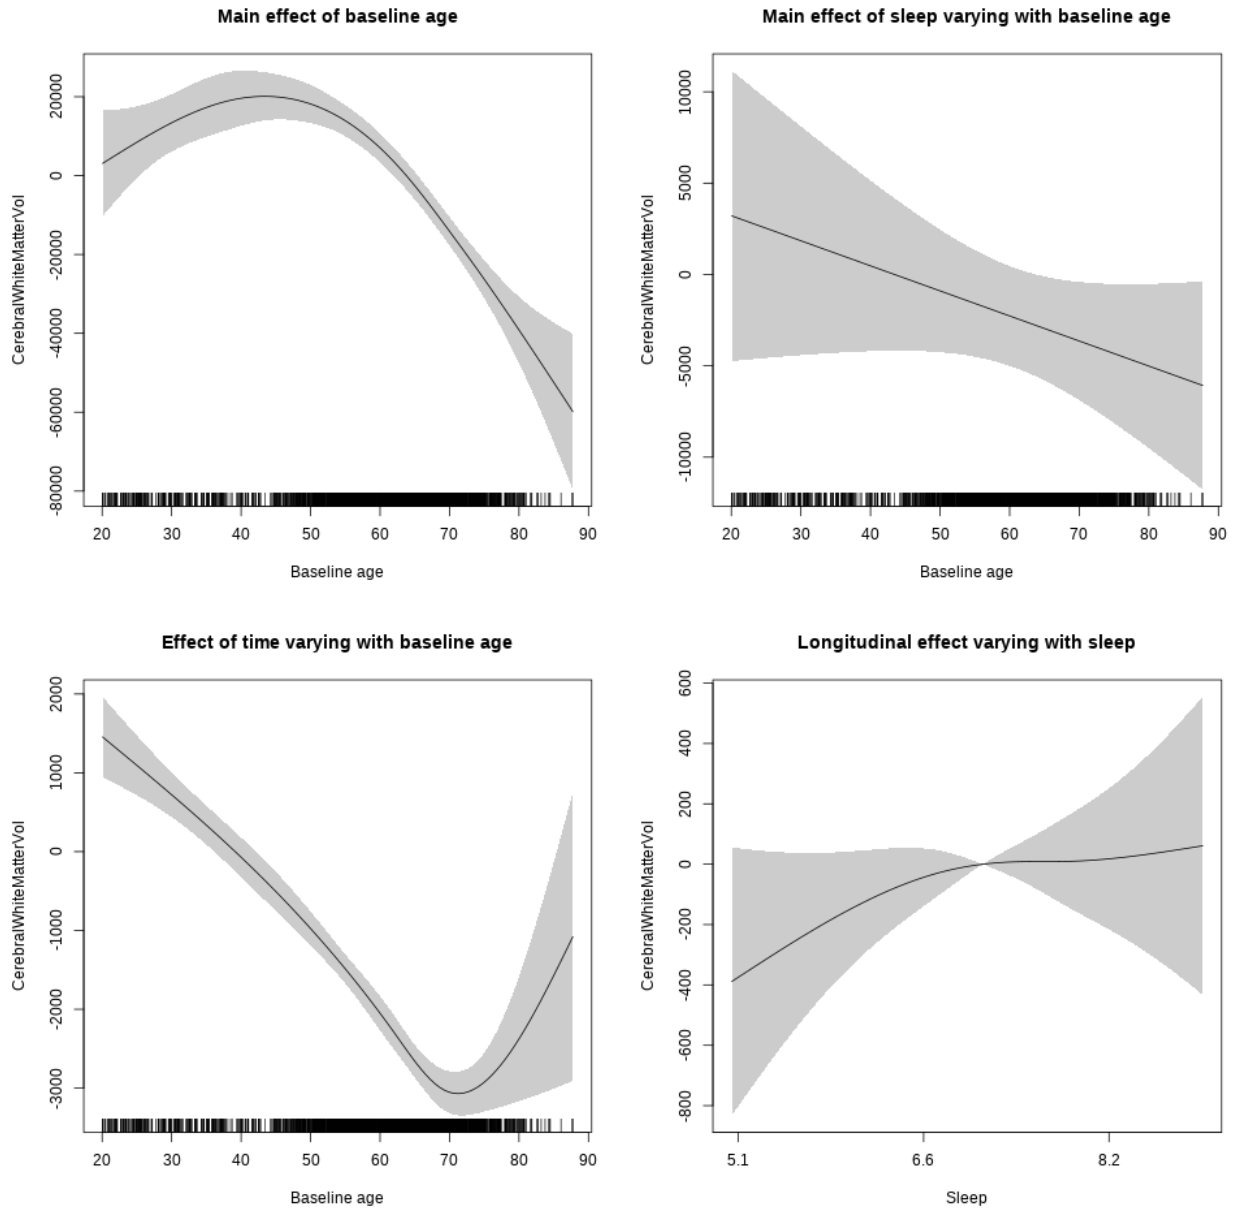

**Restricted to sleep  $\geq 5$  and  $\leq 9$  hours** Below is the row for `s(sleep_z):time` from the model output.

```
## s(sleep_z):time  1.647  1.647  2.094  0.200
```

Below are plots of a plot of `s(bl_age)`, `s(bl_age):sleep_z`, `s(bl_age):time`, and `s(sleep_z):time`. For `s(sleep_z):time`, roughly, if we cannot fit a straight line through the confidence bands, there is evidence that the effect of time depends on sleep duration. It is correct that the confidence interval is zero at one point along the axis; this happens because we do not include the main effect.

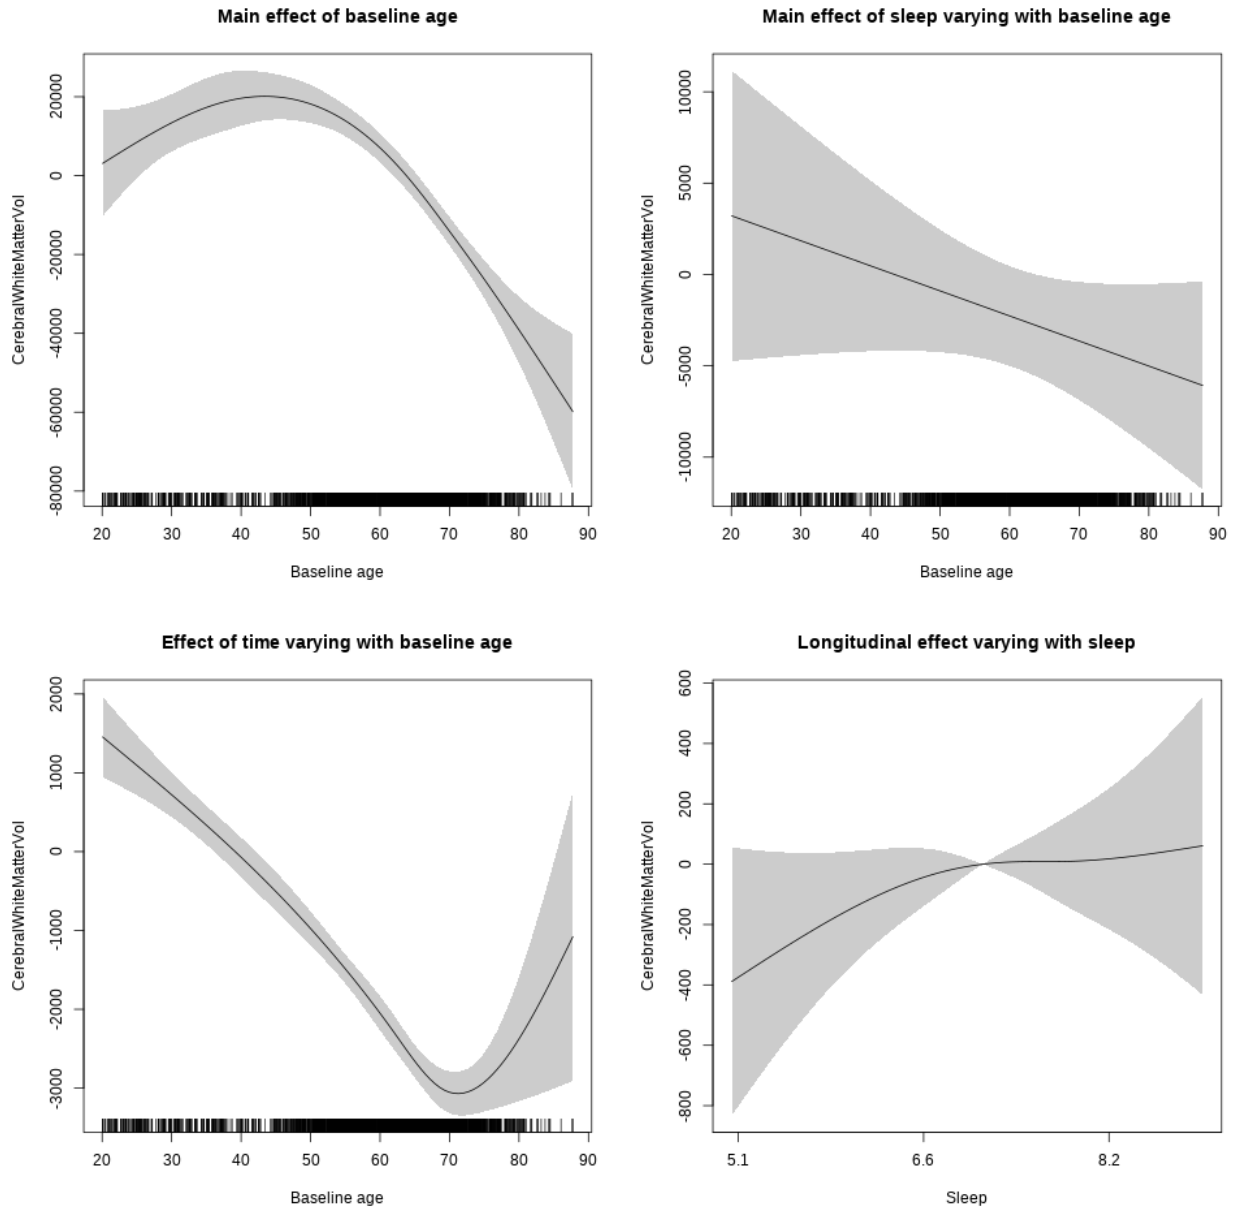

## EstimatedTotalIntraCranialVol

### Main analysis

**Full data** Below is the model output. The term `s(sleep_z):time` is probably what we care most about.

```
##
## Family: gaussian
## Link function: identity
##
## Formula:
## value ~ sex + site + s(bl_age, k = 10, bs = "cr") + s(bl_age,
##   by = sleep_z, bs = "cr") + +s(bl_age, by = time, k = 5, bs = "cr") +
```

```

##      s(sleep_z, by = time, k = 5, bs = "cr", pc = 0)
## <environment: 0x56391e8b1490>
##
## Parametric coefficients:
##           Estimate Std. Error t value Pr(>|t|)
## (Intercept)   1212478      8353 145.158 <2e-16 ***
## sexmale       182182       4199  43.389 <2e-16 ***
## siteousAvanto 325968      10789  30.212 <2e-16 ***
## siteousPrisma 405176      14379  28.179 <2e-16 ***
## siteousSkyra  270576      10789  25.079 <2e-16 ***
## siteUB        200552      22522   8.905 <2e-16 ***
## siteUCAM      267882      11544  23.205 <2e-16 ***
## siteUKB       252457       8495  29.718 <2e-16 ***
## siteUmU       175339      13779  12.725 <2e-16 ***
## ---
## Signif. codes:  0 '***' 0.001 '**' 0.01 '*' 0.05 '.' 0.1 ' ' 1
##
## Approximate significance of smooth terms:
##           edf Ref.df      F p-value
## s(bl_age)      4.309  4.309  7.227 1.48e-05 ***
## s(bl_age):sleep_z 2.000  2.000  1.488  0.226
## s(bl_age):time  2.000  2.000 87.786 < 2e-16 ***
## s(sleep_z):time  1.000  1.000  0.344  0.557
## ---
## Signif. codes:  0 '***' 0.001 '**' 0.01 '*' 0.05 '.' 0.1 ' ' 1
##
## R-sq.(adj) =  0.425
## lmer.REML = 1.9804e+05  Scale est. = 1.5165e+08  n = 8160

```

Below are plots of a plot of  $s(\text{bl\_age})$ ,  $s(\text{bl\_age}):\text{sleep\_z}$ ,  $s(\text{bl\_age}):\text{time}$ , and  $s(\text{sleep\_z}):\text{time}$ . For  $s(\text{sleep\_z}):\text{time}$ , roughly, if we cannot fit a straight line through the confidence bands, there is evidence that the effect of time depends on sleep duration. It is correct that the confidence interval is zero at one point along the axis; this happens because we do not include the main effect.

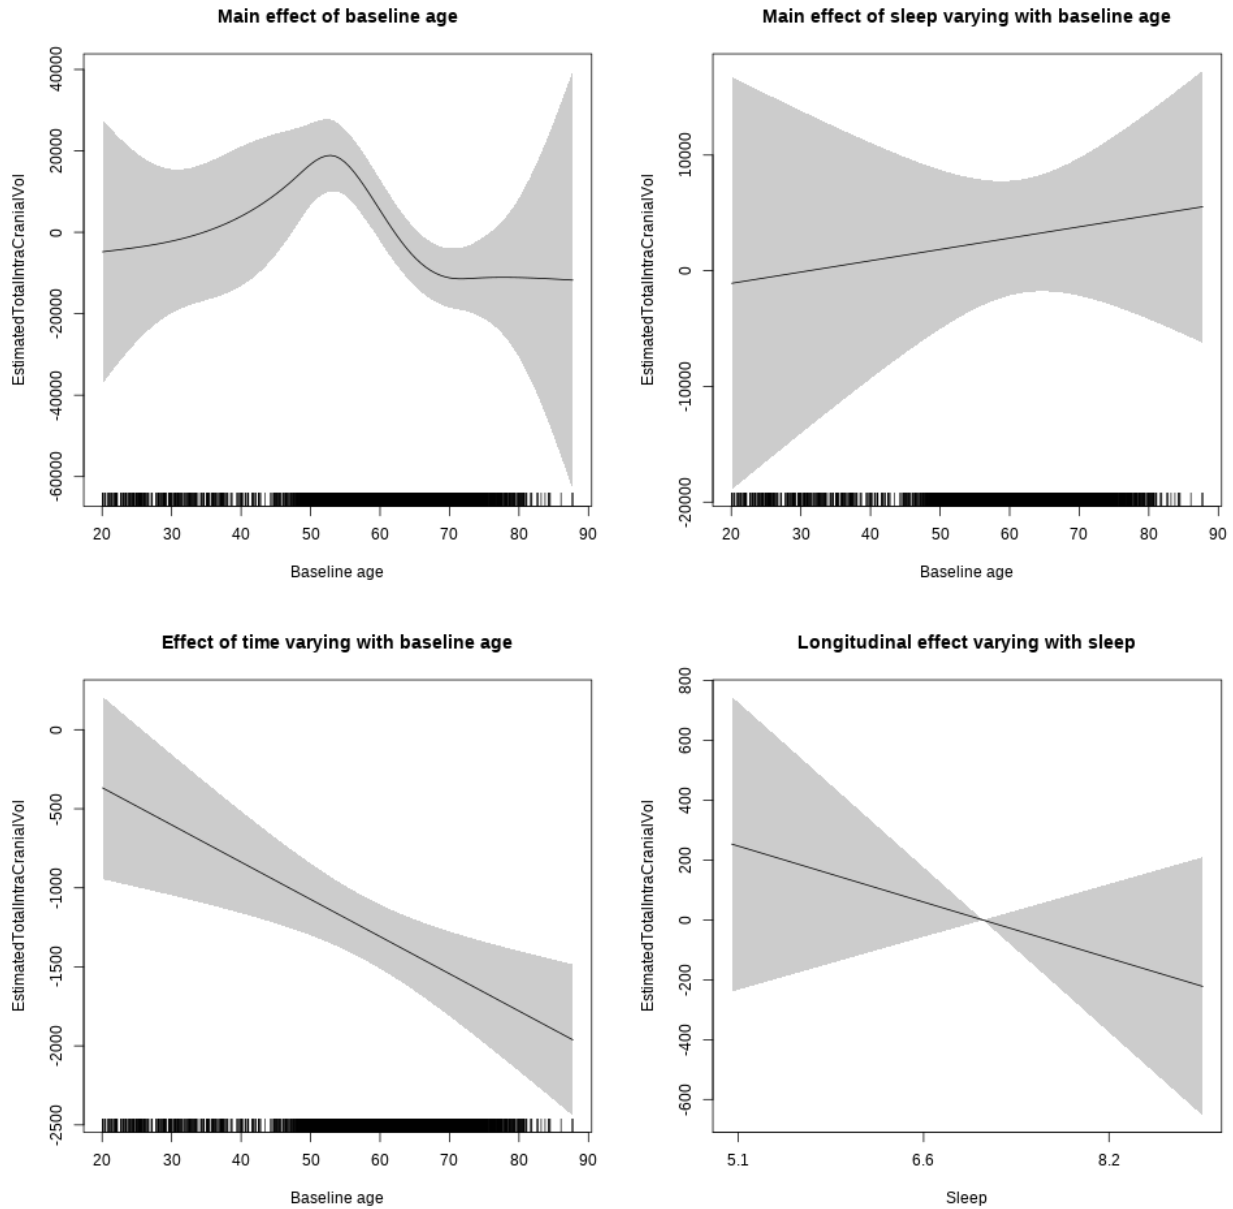

**Restricted to sleep  $\geq 5$  and  $\leq 9$  hours** Below is the row for `s(sleep_z):time` from the model output.

```
## s(sleep_z):time  1.000  1.000  1.058  0.304
```

Below are plots of a plot of `s(bl_age)`, `s(bl_age):sleep_z`, `s(bl_age):time`, and `s(sleep_z):time`. For `s(sleep_z):time`, roughly, if we cannot fit a straight line through the confidence bands, there is evidence that the effect of time depends on sleep duration. It is correct that the confidence interval is zero at one point along the axis; this happens because we do not include the main effect.





## Controlling for socioeconomic status

**Full data** Below is the model output. The term `s(sleep_z):time` is probably what we care most about.

```
##
## Family: gaussian
## Link function: identity
##
## Formula:
## value ~ sex + site + income_scaled + education_scaled + s(bl_age,
##   k = 10, bs = "cr") + s(bl_age, by = sleep_z, bs = "cr") +
##   +s(bl_age, by = time, k = 5, bs = "cr") + s(sleep_z, by = time,
##   k = 5, bs = "cr", pc = 0)
```

```

## <environment: 0x5639115506e8>
##
## Parametric coefficients:
##           Estimate Std. Error t value Pr(>|t|)
## (Intercept)   1125783     21078  53.409 < 2e-16 ***
## sexmale       176576      5285   33.408 < 2e-16 ***
## siteousAvanto 346349     22789  15.198 < 2e-16 ***
## siteousPrisma 435828     27502  15.847 < 2e-16 ***
## siteousSkyra  286279     22611  12.661 < 2e-16 ***
## siteUKB       294233     20525  14.336 < 2e-16 ***
## income_scaled 39628       7708   5.141 2.85e-07 ***
## education_scaled 42911     8972   4.783 1.78e-06 ***
## ---
## Signif. codes:  0 '***' 0.001 '**' 0.01 '*' 0.05 '.' 0.1 ' ' 1
##
## Approximate significance of smooth terms:
##           edf Ref.df      F p-value
## s(bl_age)      1.000  1.000  6.238 0.0125 *
## s(bl_age):sleep_z 2.935  2.935  0.571 0.6109
## s(bl_age):time  3.304  3.304 46.095 <2e-16 ***
## s(sleep_z):time 1.709  1.709  0.875 0.3876
## ---
## Signif. codes:  0 '***' 0.001 '**' 0.01 '*' 0.05 '.' 0.1 ' ' 1
##
## R-sq.(adj) = 0.38
## lmer.REML = 1.133e+05 Scale est. = 1.6337e+08 n = 4654

```

Below are plots of a plot of  $s(\text{bl\_age})$ ,  $s(\text{bl\_age}):\text{sleep\_z}$ ,  $s(\text{bl\_age}):\text{time}$ , and  $s(\text{sleep\_z}):\text{time}$ . For  $s(\text{sleep\_z}):\text{time}$ , roughly, if we cannot fit a straight line through the confidence bands, there is evidence that the effect of time depends on sleep duration. It is correct that the confidence interval is zero at one point along the axis; this happens because we do not include the main effect.

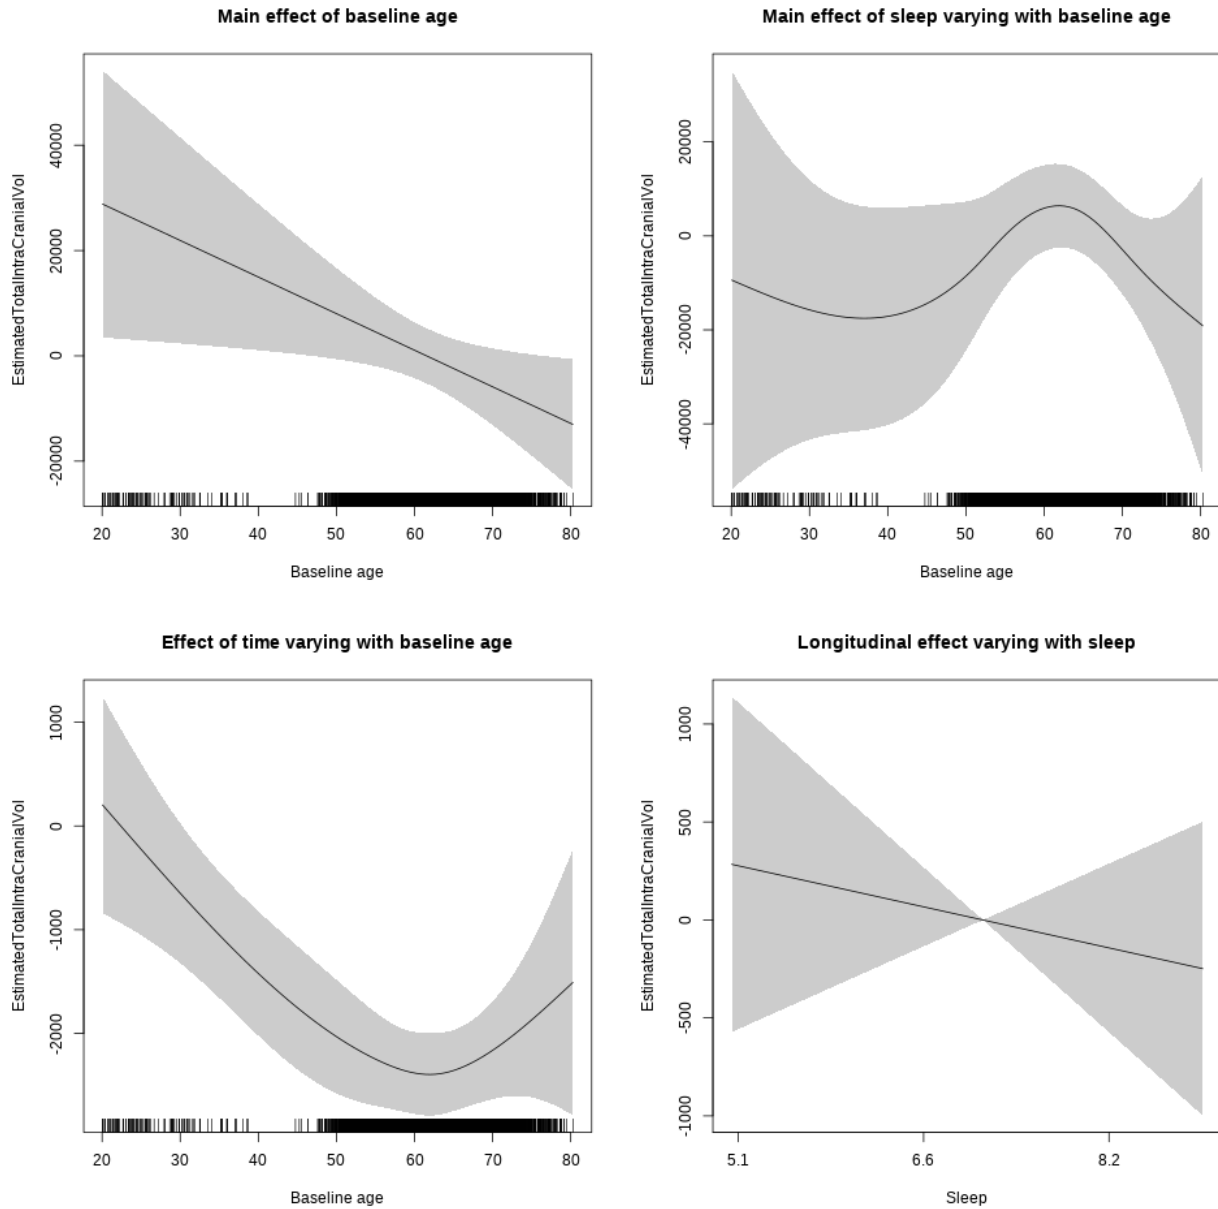

**Restricted to sleep  $\geq 5$  and  $\leq 9$  hours** Below is the row for `s(sleep_z):time` from the model output.

```
## s(sleep_z):time  1.000  1.000  0.440  0.5073
```

Below are plots of a plot of `s(bl_age)`, `s(bl_age):sleep_z`, `s(bl_age):time`, and `s(sleep_z):time`. For `s(sleep_z):time`, roughly, if we cannot fit a straight line through the confidence bands, there is evidence that the effect of time depends on sleep duration. It is correct that the confidence interval is zero at one point along the axis; this happens because we do not include the main effect.



## Controlling for BMI

**Full data** Below is the model output. The term `s(sleep_z):time` is probably what we care most about.

```
##
## Family: gaussian
## Link function: identity
##
## Formula:
## value ~ sex + site + bmi + s(bl_age, k = 10, bs = "cr") + s(bl_age,
##   by = sleep_z, bs = "cr") + +s(bl_age, by = time, k = 5, bs = "cr") +
##   s(sleep_z, by = time, k = 5, bs = "cr", pc = 0)
## <environment: 0x56390d7cfaf0>
```

```

##
## Parametric coefficients:
##           Estimate Std. Error t value Pr(>|t|)
## (Intercept) 1474290.4   19351.0  76.187 < 2e-16 ***
## sexmale     178569.1    4940.6  36.143 < 2e-16 ***
## siteousPrisma 78841.5    9927.4   7.942 2.41e-15 ***
## siteousSkyra -57629.2    3177.7 -18.136 < 2e-16 ***
## siteUCAM     -46813.8   13636.5  -3.433 0.000601 ***
## siteUKB      -57810.2   12358.7  -4.678 2.97e-06 ***
## siteUmU      -141293.9  16117.9  -8.766 < 2e-16 ***
## bmi          2054.0     613.6   3.348 0.000821 ***
## ---
## Signif. codes:  0 '***' 0.001 '**' 0.01 '*' 0.05 '.' 0.1 ' ' 1
##
## Approximate significance of smooth terms:
##           edf Ref.df    F  p-value
## s(bl_age)      2.509  2.509 11.078 7.02e-05 ***
## s(bl_age):sleep_z 2.000  2.000  0.973  0.378
## s(bl_age):time  3.301  3.301 60.002 < 2e-16 ***
## s(sleep_z):time 1.000  1.000  0.284  0.594
## ---
## Signif. codes:  0 '***' 0.001 '**' 0.01 '*' 0.05 '.' 0.1 ' ' 1
##
## R-sq.(adj) =  0.341
## lmer.REML = 1.3166e+05  Scale est. = 1.4603e+08  n = 5416

```

Below are plots of a plot of  $s(\text{bl\_age})$ ,  $s(\text{bl\_age}):\text{sleep\_z}$ ,  $s(\text{bl\_age}):\text{time}$ , and  $s(\text{sleep\_z}):\text{time}$ . For  $s(\text{sleep\_z}):\text{time}$ , roughly, if we cannot fit a straight line through the confidence bands, there is evidence that the effect of time depends on sleep duration. It is correct the that confidence interval is zero at one point along the axis; this happens because we do not include the main effect.

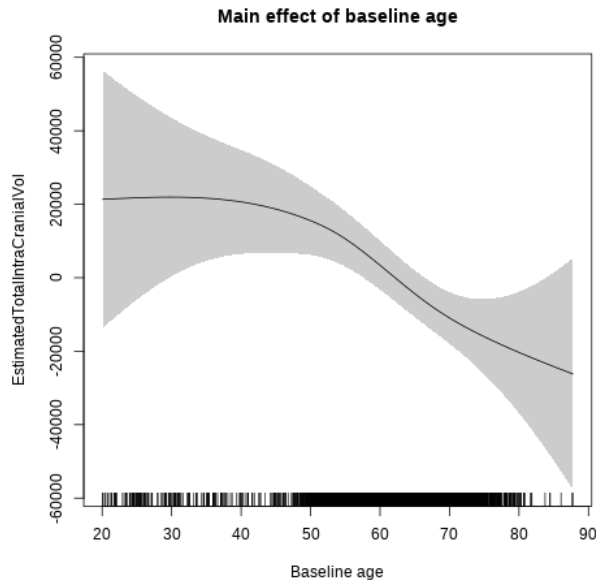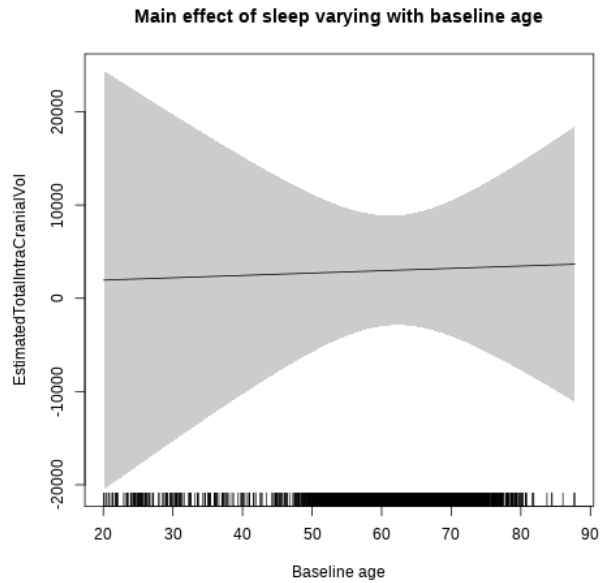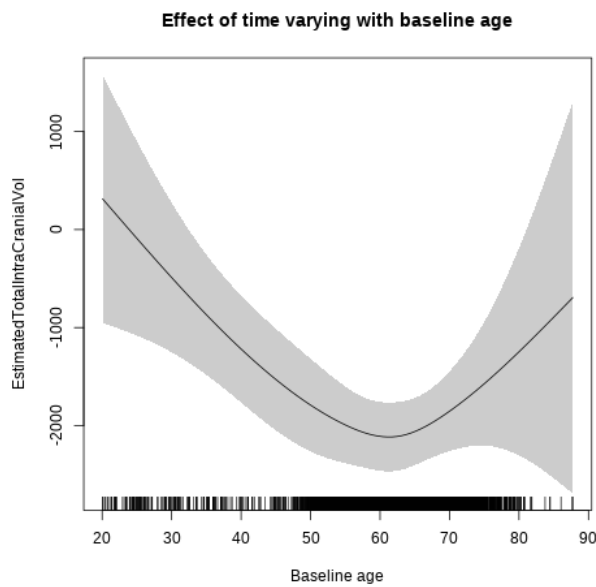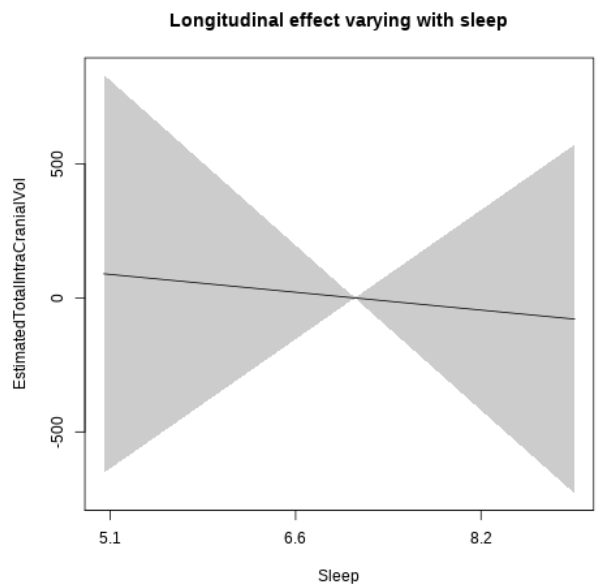

**Restricted to sleep  $\geq 5$  and  $\leq 9$  hours** Below is the row for `s(sleep_z):time` from the model output.

```
## s(sleep_z):time 1.000 1.000 0.059 0.808435
```

Below are plots of a plot of `s(bl_age)`, `s(bl_age):sleep_z`, `s(bl_age):time`, and `s(sleep_z):time`. For `s(sleep_z):time`, roughly, if we cannot fit a straight line through the confidence bands, there is evidence that the effect of time depends on sleep duration. It is correct that the confidence interval is zero at one point along the axis; this happens because we do not include the main effect.

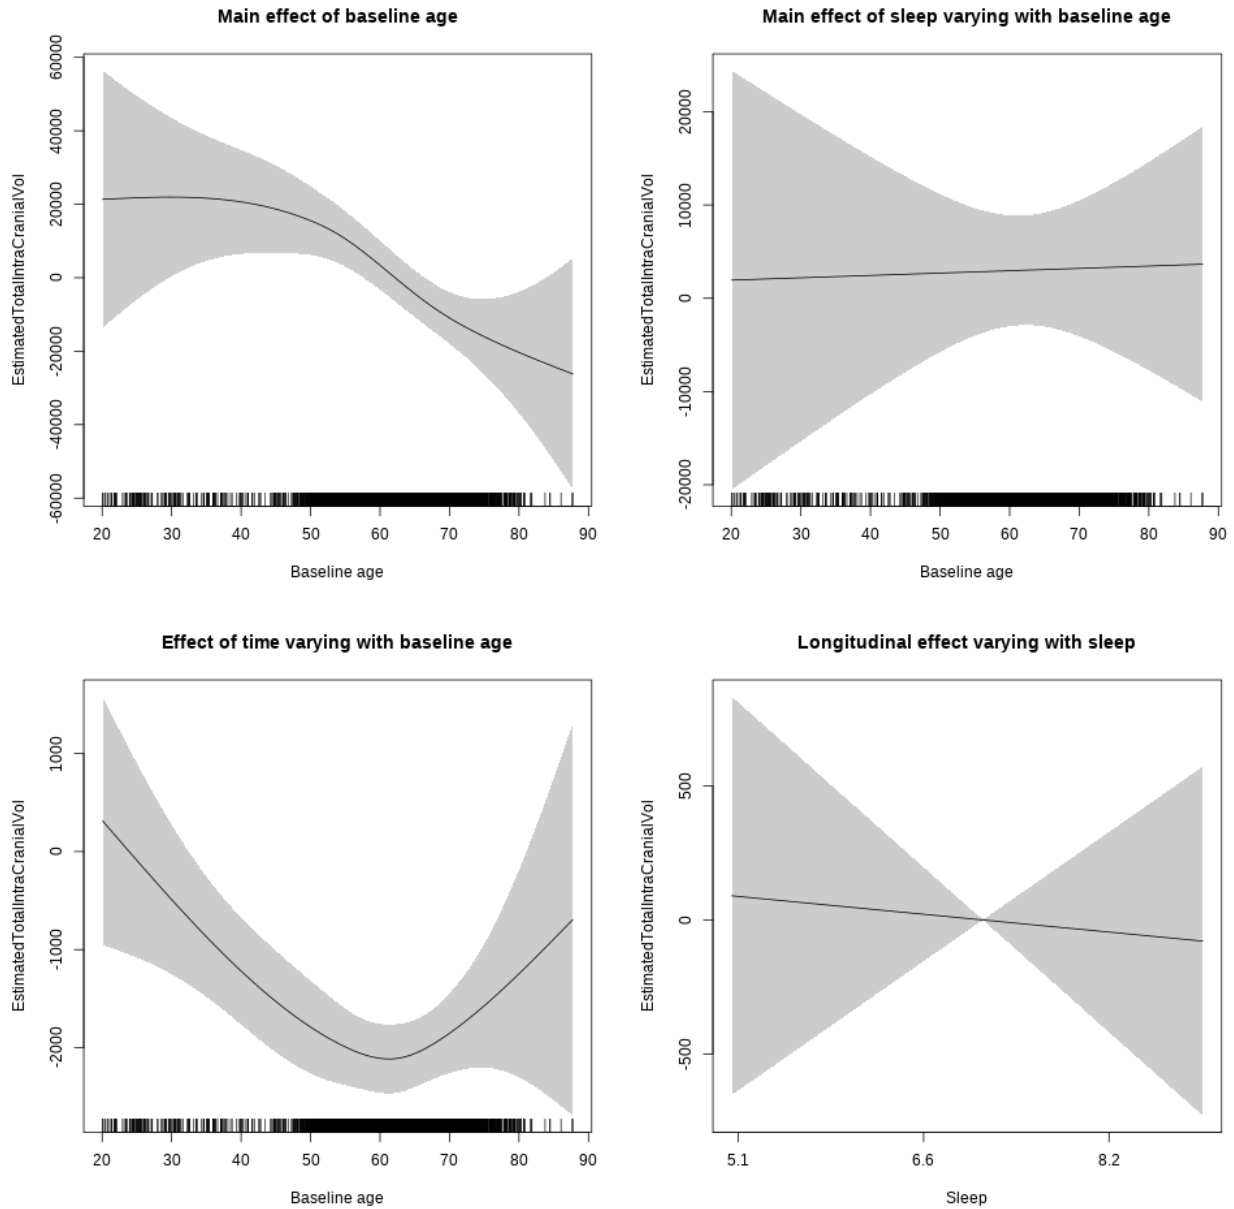

## Controlling for depression

**Full data** Below is the model output. The term `s(sleep_z):time` is probably what we care most about.

```
##
## Family: gaussian
## Link function: identity
##
## Formula:
## value ~ sex + site + depression + s(bl_age, k = 10, bs = "cr") +
##       s(bl_age, by = sleep_z, bs = "cr") + +s(bl_age, by = time,
##       k = 5, bs = "cr") + s(sleep_z, by = time, k = 5, bs = "cr",
##       pc = 0)
```

```

## <environment: 0x563911fef868>
##
## Parametric coefficients:
##           Estimate Std. Error t value Pr(>|t|)
## (Intercept)  1214420      9627 126.149 < 2e-16 ***
## sexmale      185634       4890  37.962 < 2e-16 ***
## siteousAvanto 278056     20538  13.539 < 2e-16 ***
## siteousPrisma 345121     23302  14.811 < 2e-16 ***
## siteousSkyra  216900     20160  10.759 < 2e-16 ***
## siteUCAM      245980     12856  19.133 < 2e-16 ***
## siteUKB       248363       9397  26.429 < 2e-16 ***
## siteUmU       140552     16396   8.572 < 2e-16 ***
## depression    58524      20758   2.819  0.00483 **
## ---
## Signif. codes:  0 '***' 0.001 '**' 0.01 '*' 0.05 '.' 0.1 ' ' 1
##
## Approximate significance of smooth terms:
##           edf Ref.df    F  p-value
## s(bl_age)      3.315  3.315  5.010 0.000832 ***
## s(bl_age):sleep_z 2.000  2.000  1.278 0.278550
## s(bl_age):time  3.648  3.648 53.345 < 2e-16 ***
## s(sleep_z):time  1.000  1.000  0.073 0.786631
## ---
## Signif. codes:  0 '***' 0.001 '**' 0.01 '*' 0.05 '.' 0.1 ' ' 1
##
## R-sq.(adj) =  0.426
## lmer.REML = 1.3826e+05  Scale est. = 1.4137e+08  n = 5683

```

Below are plots of a plot of `s(bl_age)`, `s(bl_age):sleep_z`, `s(bl_age):time`, and `s(sleep_z):time`. For `s(sleep_z):time`, roughly, if we cannot fit a straight line through the confidence bands, there is evidence that the effect of time depends on sleep duration. It is correct that the confidence interval is zero at one point along the axis; this happens because we do not include the main effect.



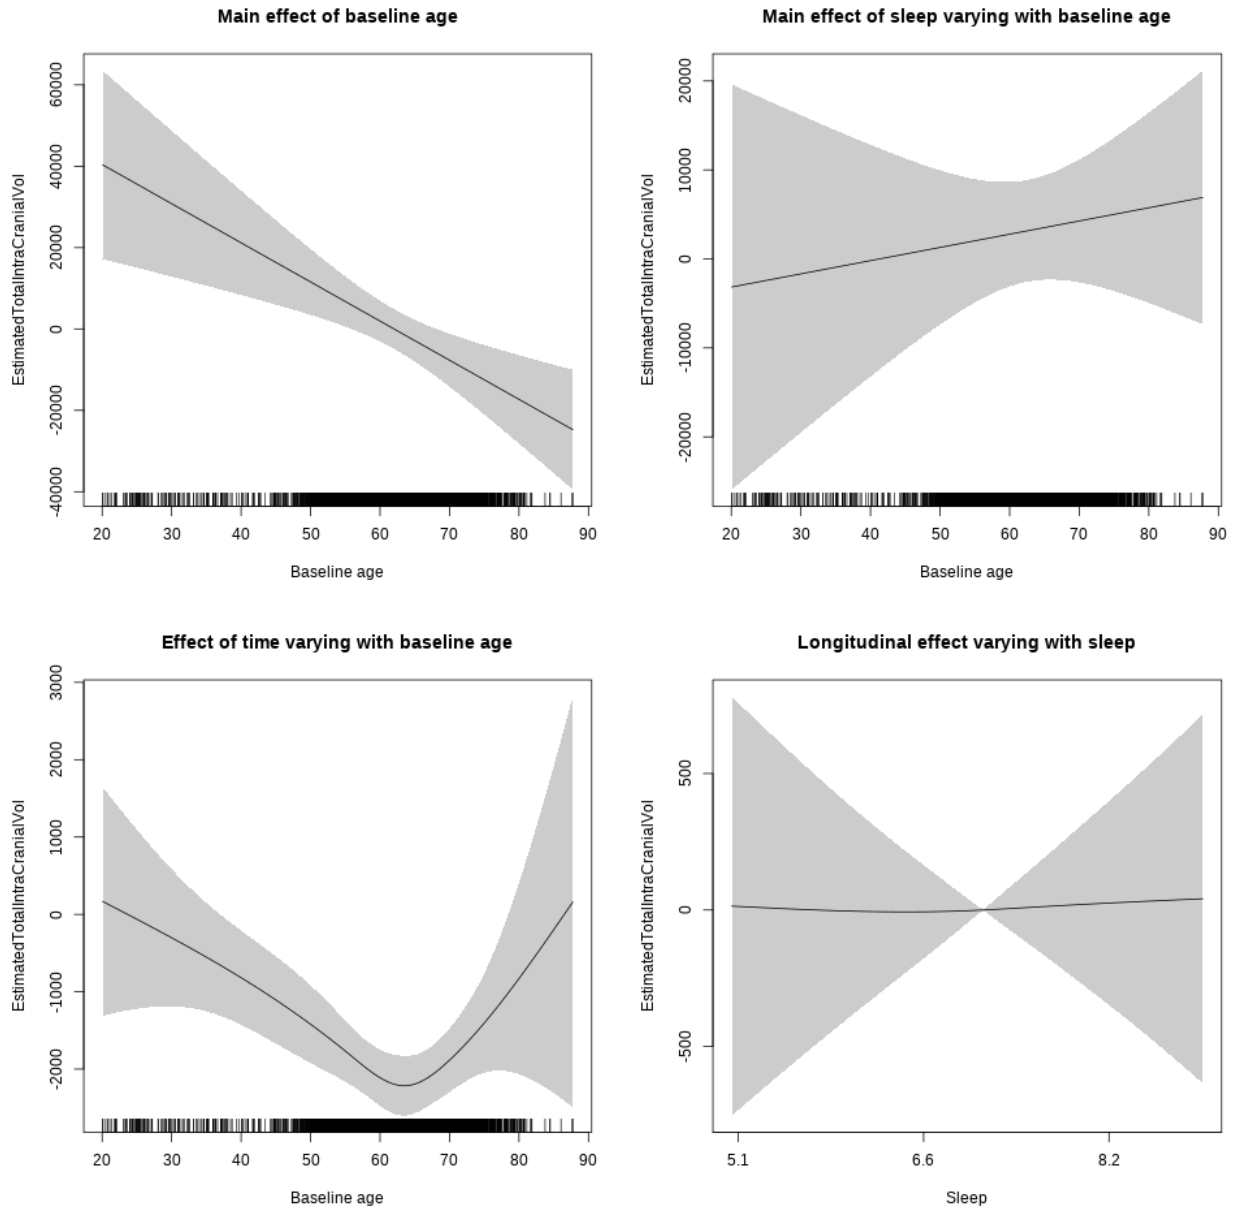

**Restricted to sleep  $\geq 5$  and  $\leq 9$  hours** Below is the row for `s(sleep_z):time` from the model output.

```
## s(sleep_z):time  1.067  1.067  0.003  0.977572
```

Below are plots of a plot of `s(bl_age)`, `s(bl_age):sleep_z`, `s(bl_age):time`, and `s(sleep_z):time`. For `s(sleep_z):time`, roughly, if we cannot fit a straight line through the confidence bands, there is evidence that the effect of time depends on sleep duration. It is correct that the confidence interval is zero at one point along the axis; this happens because we do not include the main effect.



## Controlling for sleep quality

**Full data** Below is the model output. The term `s(sleep_z):time` is probably what we care most about.

```
##
## Family: gaussian
## Link function: identity
##
## Formula:
## value ~ X + s(bl_age, k = 10, bs = "cr") + s(bl_age, by = sleep_z,
##       bs = "cr") + s(bl_age, by = time, k = 5, bs = "cr") + s(sleep_z,
##       by = time, k = 5, bs = "cr", pc = 0)
## <environment: 0x563915389488>
```

```

##
## Parametric coefficients:
##              Estimate Std. Error t value Pr(>|t|)
## (Intercept)    1218247.2    15741.4  77.391 < 2e-16 ***
## Xsexmale       177387.2     5903.9  30.046 < 2e-16 ***
## XsiteousAvanto 338458.7    14973.4  22.604 < 2e-16 ***
## XsiteousPrisma 413974.1    17488.3  23.671 < 2e-16 ***
## XsiteousSkyra  281067.8    14980.8  18.762 < 2e-16 ***
## XsiteUB        213377.4    24011.4   8.887 < 2e-16 ***
## XsiteUCAM      284547.2    15293.9  18.605 < 2e-16 ***
## XsiteUKB       252347.0    47881.6   5.270 1.43e-07 ***
## XsiteUmU       196492.9    17118.9  11.478 < 2e-16 ***
## Xukb_dummy:sleep_accel    -759.6    3709.7  -0.205  0.8378
## Xukb_dummy:chronotype     5779.3    4939.0   1.170  0.2420
## Xukb_dummy:dozing        14355.5   10207.1   1.406  0.1597
## Xukb_dummy:sleeplessness -12091.0    6349.0  -1.904  0.0569 .
## Xukb_dummy:snoring        9478.5    9009.8   1.052  0.2929
## Xukb_dummy:gettingup     -485.3    6892.1  -0.070  0.9439
## Xnotukb_dummy:PSQI_Global -4948.4    1953.2  -2.533  0.0113 *
## ---
## Signif. codes:  0 '***' 0.001 '**' 0.01 '*' 0.05 '.' 0.1 ' ' 1
##
## Approximate significance of smooth terms:
##              edf Ref.df      F p-value
## s(bl_age)      2.157  2.157  4.793 0.00536 **
## s(bl_age):sleep_z 2.000  2.000  0.460 0.63143
## s(bl_age):time  2.000  2.000 22.682 < 2e-16 ***
## s(sleep_z):time 1.000  1.000  0.000 0.98501
## ---
## Signif. codes:  0 '***' 0.001 '**' 0.01 '*' 0.05 '.' 0.1 ' ' 1
##
## R-sq.(adj) =  0.427
## lmer.REML = 1.0329e+05  Scale est. = 1.365e+08  n = 4290

```

Below are plots of a plot of `s(bl_age)`, `s(bl_age):sleep_z`, `s(bl_age):time`, and `s(sleep_z):time`. For `s(sleep_z):time`, roughly, if we cannot fit a straight line through the confidence bands, there is evidence that the effect of time depends on sleep duration. It is correct that that confidence interval is zero at one point along the axis; this happens because we do not include the main effect.

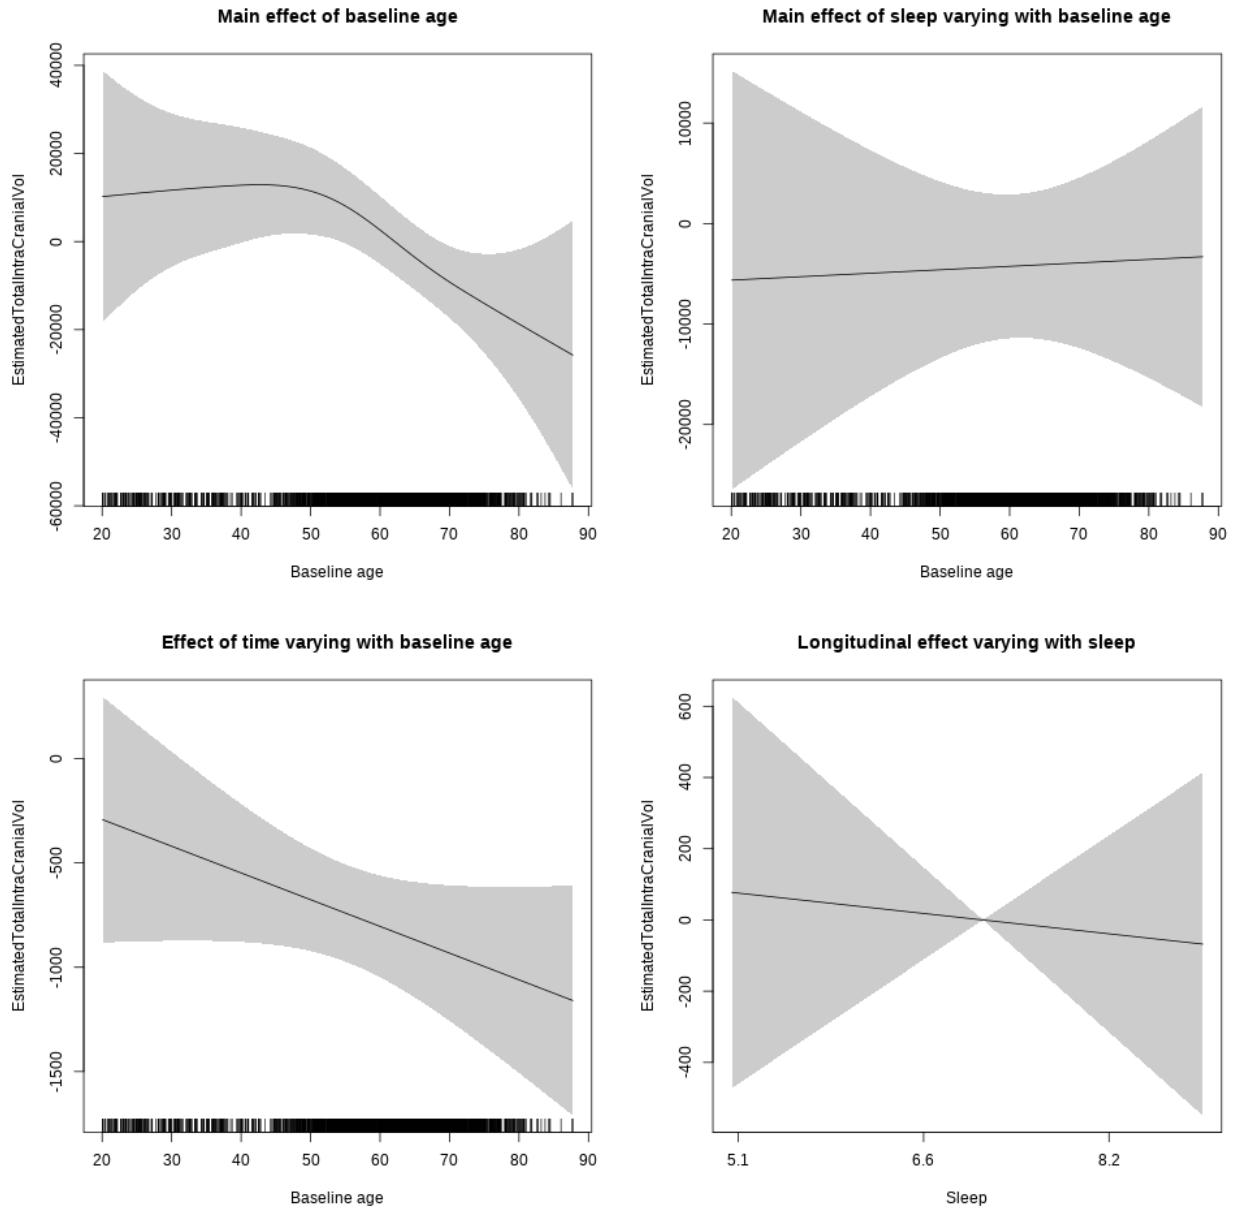

**Restricted to sleep  $\geq 5$  and  $\leq 9$  hours** Below is the row for `s(sleep_z):time` from the model output.

```
## s(sleep_z):time 1.000 1.000 0.079 0.77828
```

Below are plots of a plot of `s(bl_age)`, `s(bl_age):sleep_z`, `s(bl_age):time`, and `s(sleep_z):time`. For `s(sleep_z):time`, roughly, if we cannot fit a straight line through the confidence bands, there is evidence that the effect of time depends on sleep duration. It is correct that the confidence interval is zero at one point along the axis; this happens because we do not include the main effect.

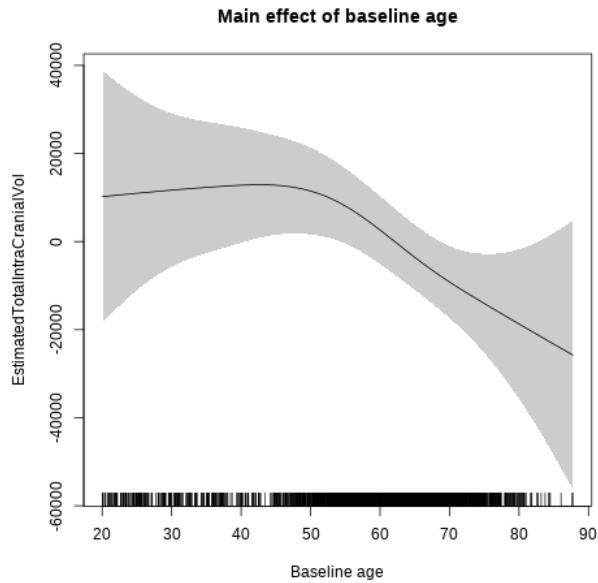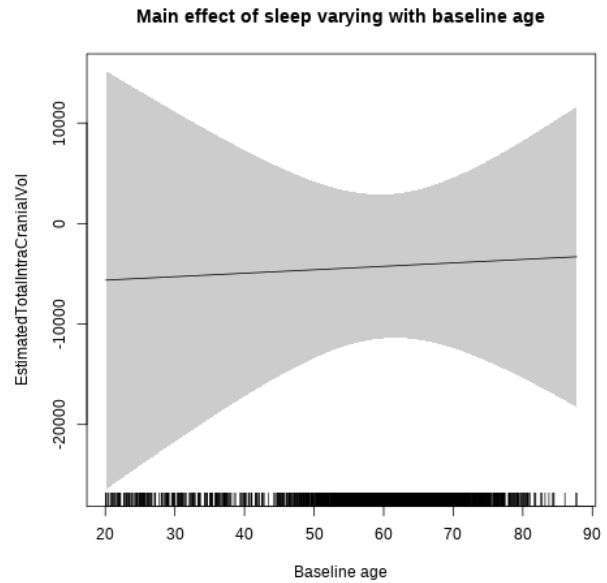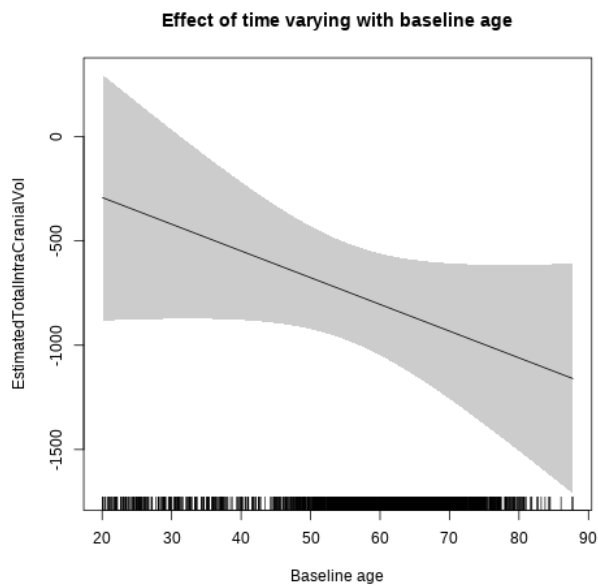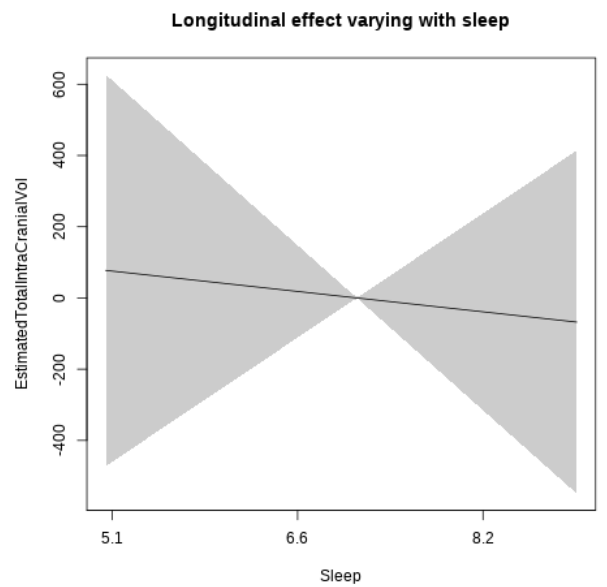

## Hippocampus

### Main analysis

**Full data** Below is the model output. The term `s(sleep_z):time` is probably what we care most about.

```
##
## Family: gaussian
## Link function: identity
##
## Formula:
## value ~ sex + site + icv + s(bl_age, k = 10, bs = "cr") + s(bl_age,
##   by = sleep_z, bs = "cr") + +s(bl_age, by = time, k = 5, bs = "cr") +
```

```

##      s(sleep_z, by = time, k = 5, bs = "cr", pc = 0)
## <environment: 0x56390da03b10>
##
## Parametric coefficients:
##           Estimate Std. Error t value Pr(>|t|)
## (Intercept)  8494.38     47.48 178.899 < 2e-16 ***
## sexmale      71.91      24.42   2.945 0.003240 **
## siteousAvanto -843.25     58.21 -14.486 < 2e-16 ***
## siteousPrisma -873.64    129.01  -6.772 1.36e-11 ***
## siteousSkyra  -552.16     56.69  -9.740 < 2e-16 ***
## siteUB       -417.88    110.86  -3.769 0.000165 ***
## siteUCAM     -481.02     59.91  -8.028 1.13e-15 ***
## siteUKB      -363.10     45.47  -7.986 1.59e-15 ***
## siteUmU      -305.70     68.65  -4.453 8.58e-06 ***
## icv          397.84     11.50  34.584 < 2e-16 ***
## ---
## Signif. codes:  0 '***' 0.001 '**' 0.01 '*' 0.05 '.' 0.1 ' ' 1
##
## Approximate significance of smooth terms:
##           edf Ref.df      F p-value
## s(bl_age)      4.863  4.863 229.766 < 2e-16 ***
## s(bl_age):sleep_z 2.000  2.000   4.914 0.00736 **
## s(bl_age):time  4.166  4.166 298.865 < 2e-16 ***
## s(sleep_z):time  1.800  1.800   1.997 0.23218
## ---
## Signif. codes:  0 '***' 0.001 '**' 0.01 '*' 0.05 '.' 0.1 ' ' 1
##
## R-sq.(adj) =  0.443
## lmer.REML = 1.1878e+05 Scale est. = 22110      n = 8150

```

Below are plots of a plot of  $s(\text{bl\_age})$ ,  $s(\text{bl\_age}):\text{sleep\_z}$ ,  $s(\text{bl\_age}):\text{time}$ , and  $s(\text{sleep\_z}):\text{time}$ . For  $s(\text{sleep\_z}):\text{time}$ , roughly, if we cannot fit a straight line through the confidence bands, there is evidence that the effect of time depends on sleep duration. It is correct that the confidence interval is zero at one point along the axis; this happens because we do not include the main effect.

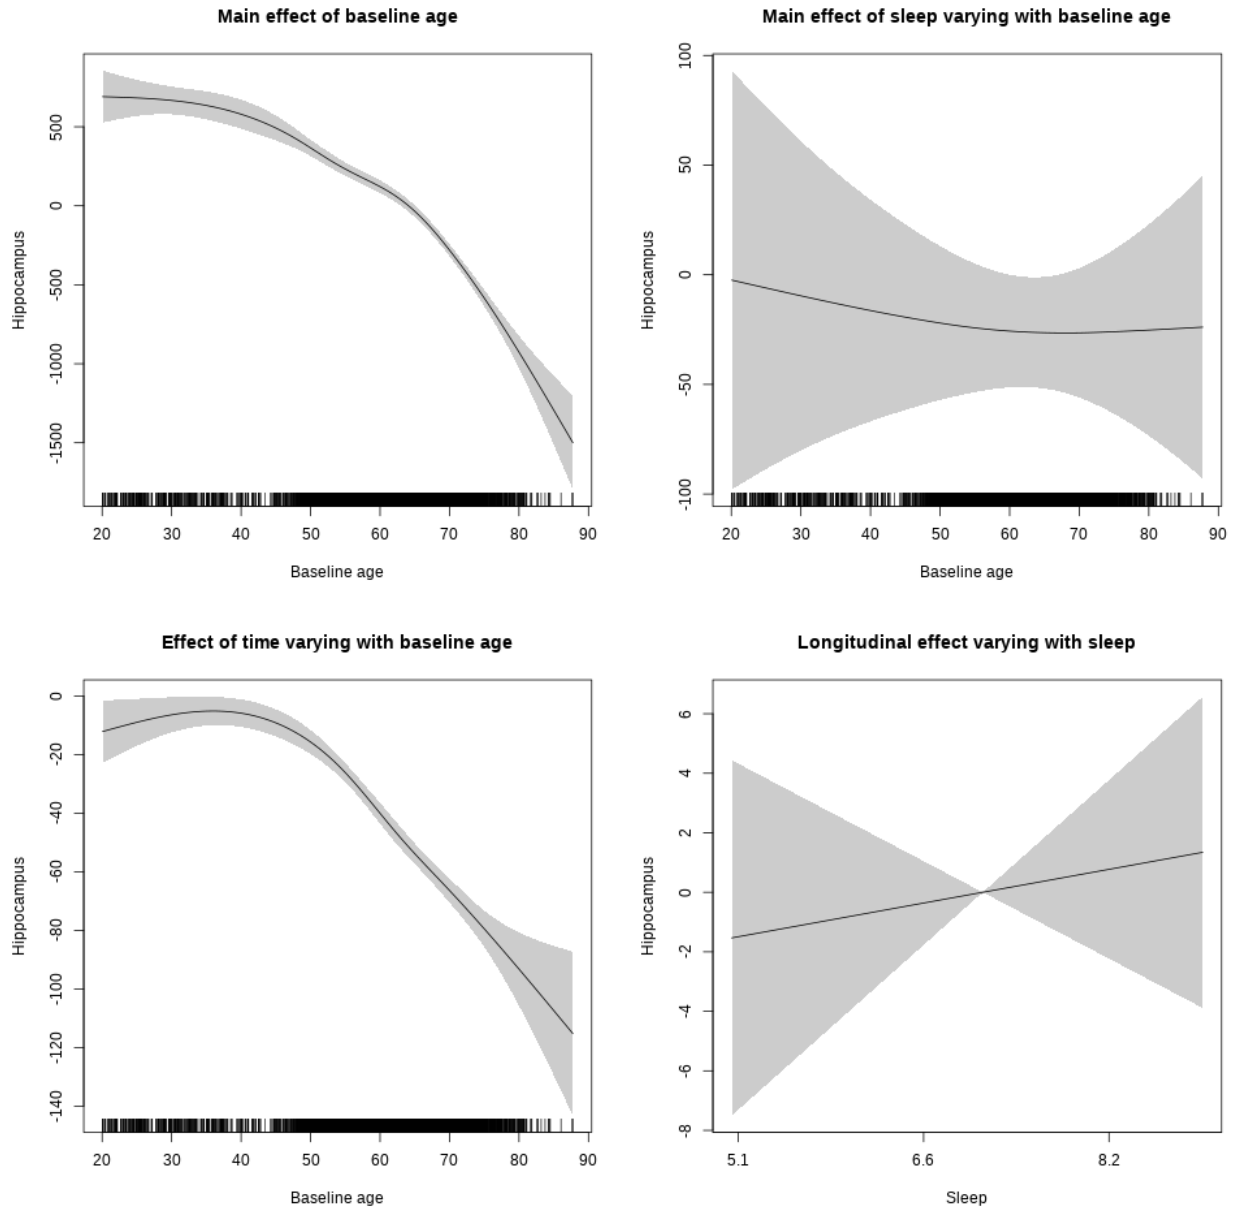

**Restricted to sleep  $\geq 5$  and  $\leq 9$  hours** Below is the row for `s(sleep_z):time` from the model output.

```
## s(sleep_z):time 1.000 1.000 0.264 0.608
```

Below are plots of a plot of `s(bl_age)`, `s(bl_age):sleep_z`, `s(bl_age):time`, and `s(sleep_z):time`. For `s(sleep_z):time`, roughly, if we cannot fit a straight line through the confidence bands, there is evidence that the effect of time depends on sleep duration. It is correct that the confidence interval is zero at one point along the axis; this happens because we do not include the main effect.

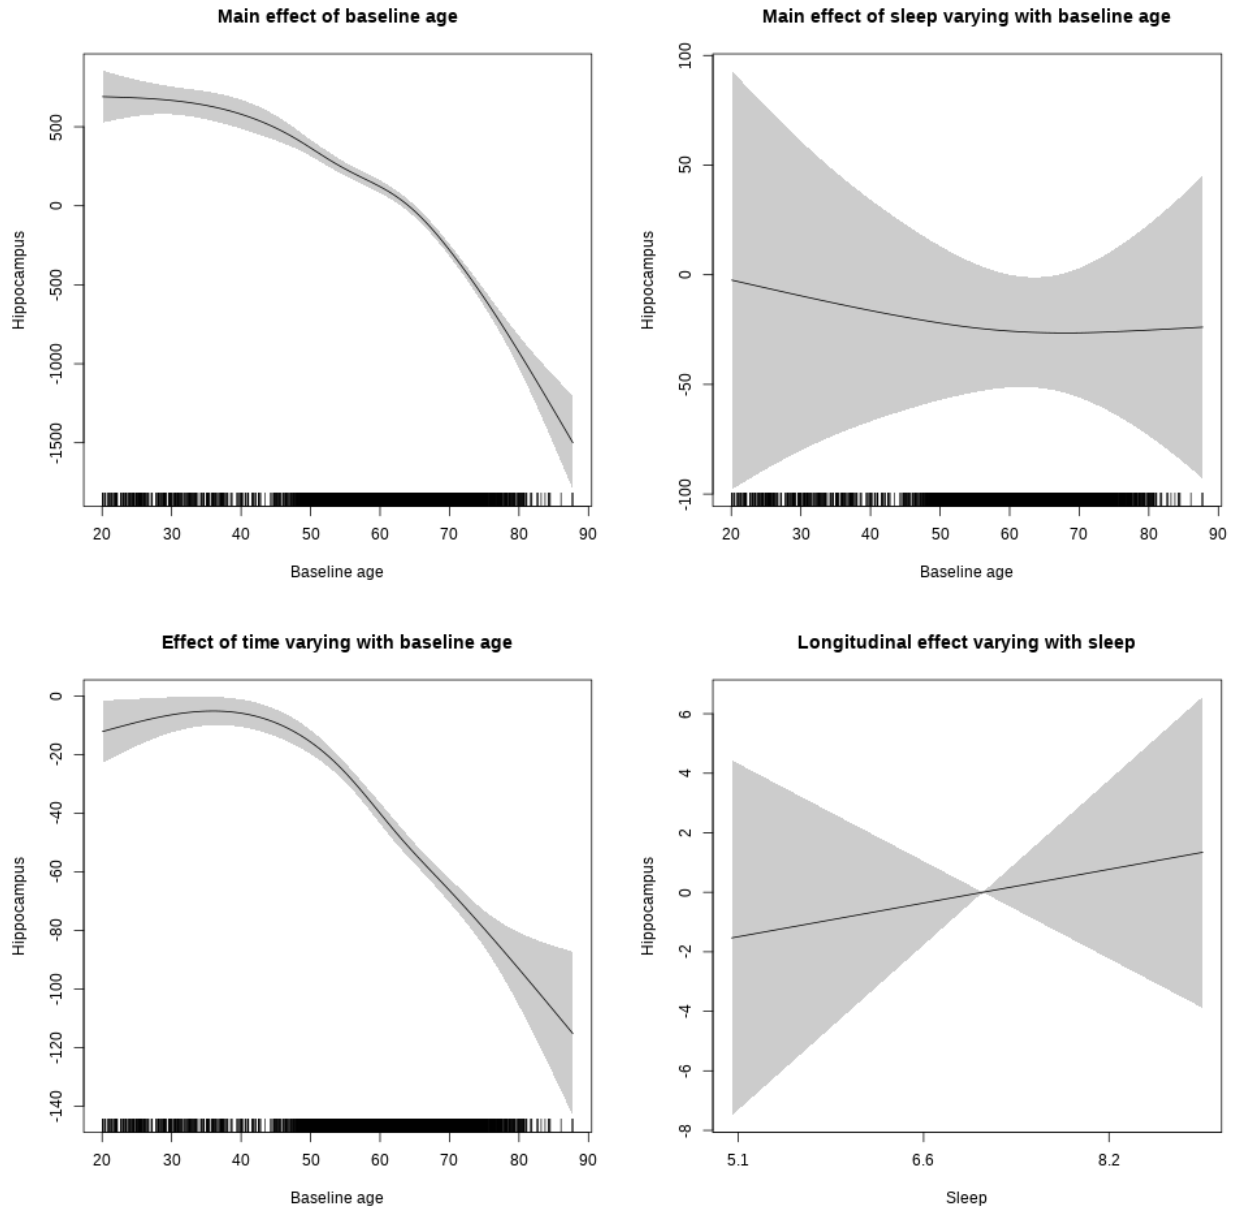

### Controlling for socioeconomic status

**Full data** Below is the model output. The term `s(sleep_z):time` is probably what we care most about.

```
##
## Family: gaussian
## Link function: identity
##
## Formula:
## value ~ sex + site + income_scaled + education_scaled + icv +
##       s(bl_age, k = 10, bs = "cr") + s(bl_age, by = sleep_z, bs = "cr") +
##       +s(bl_age, by = time, k = 5, bs = "cr") + s(sleep_z, by = time,
##       k = 5, bs = "cr", pc = 0)
```



```

## <environment: 0x56391158aa40>
##
## Parametric coefficients:
##           Estimate Std. Error t value Pr(>|t|)
## (Intercept)   8615.66    112.85  76.348 < 2e-16 ***
## sexmale        33.10     30.83   1.074  0.283
## siteousAvanto -979.54    121.58  -8.056 9.91e-16 ***
## siteousPrisma -1186.51   220.66  -5.377 7.94e-08 ***
## siteousSkyra  -625.47    115.29  -5.425 6.08e-08 ***
## siteUKB       -491.63    106.98  -4.596 4.43e-06 ***
## income_scaled  45.06     39.85   1.131  0.258
## education_scaled -24.10    44.02  -0.548  0.584
## icv           452.86     14.99  30.213 < 2e-16 ***
## ---
## Signif. codes:  0 '***' 0.001 '**' 0.01 '*' 0.05 '.' 0.1 ' ' 1
##
## Approximate significance of smooth terms:
##           edf Ref.df      F p-value
## s(bl_age)      3.676  3.676 100.186 <2e-16 ***
## s(bl_age):sleep_z 2.000  2.000   1.245  0.288
## s(bl_age):time  3.728  3.728 131.022 <2e-16 ***
## s(sleep_z):time  2.326  2.326   1.883  0.151
## ---
## Signif. codes:  0 '***' 0.001 '**' 0.01 '*' 0.05 '.' 0.1 ' ' 1
##
## R-sq.(adj) =  0.426
## lmer.REML = 67844 Scale est. = 23122      n = 4646

```

Below are plots of a plot of  $s(\text{bl\_age})$ ,  $s(\text{bl\_age}):\text{sleep\_z}$ ,  $s(\text{bl\_age}):\text{time}$ , and  $s(\text{sleep\_z}):\text{time}$ . For  $s(\text{sleep\_z}):\text{time}$ , roughly, if we cannot fit a straight line through the confidence bands, there is evidence that the effect of time depends on sleep duration. It is correct that the confidence interval is zero at one point along the axis; this happens because we do not include the main effect.

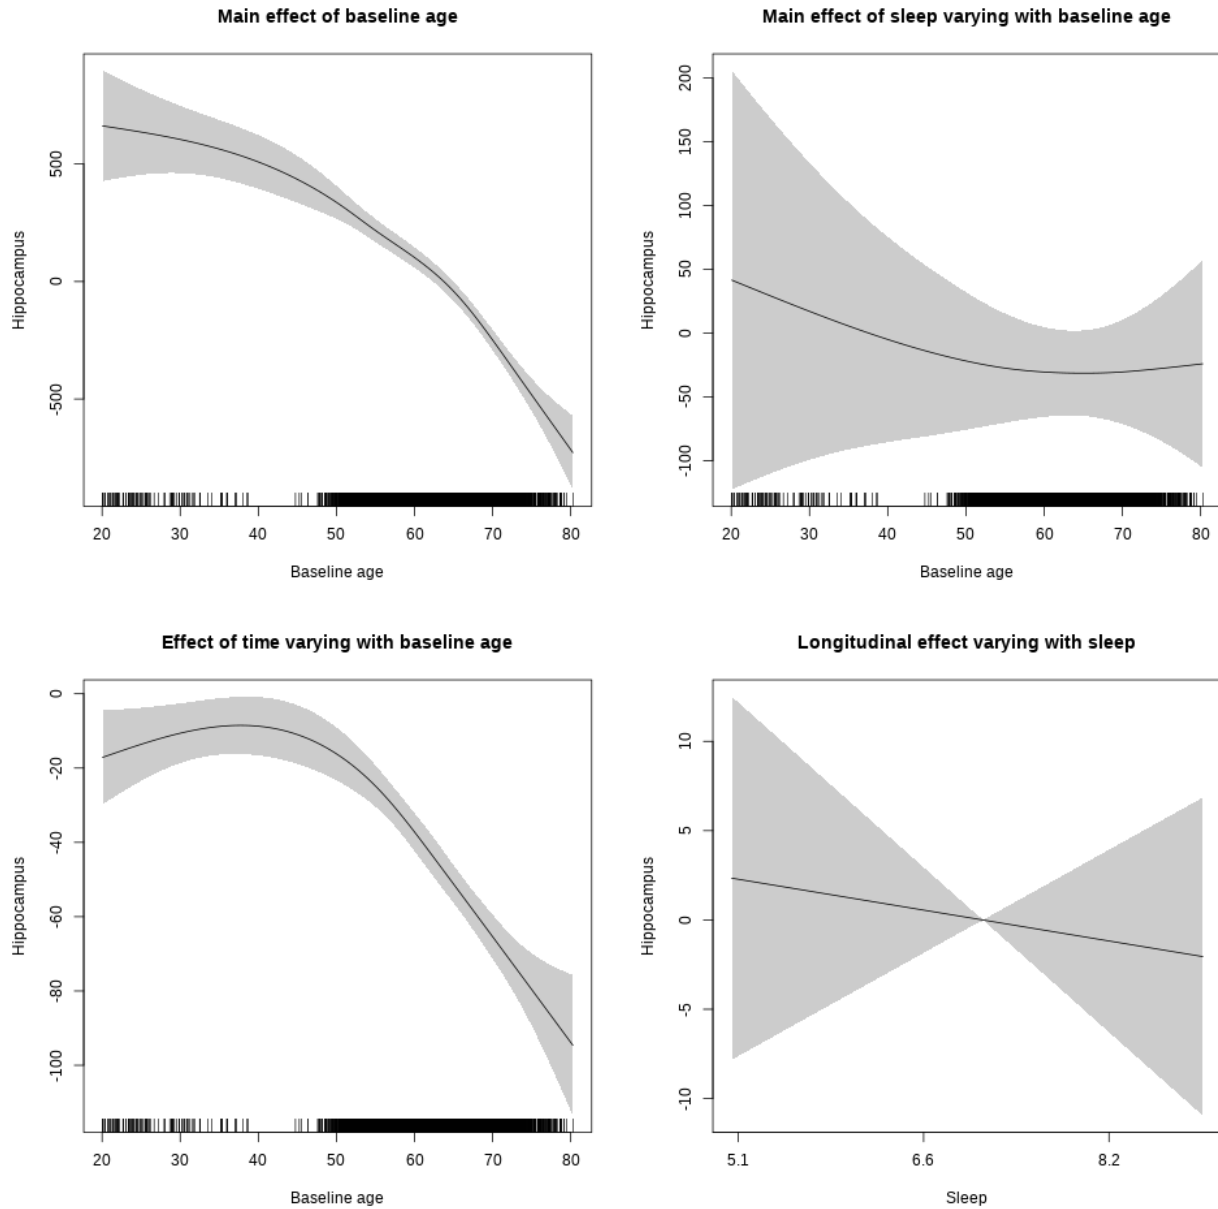

**Restricted to sleep  $\geq 5$  and  $\leq 9$  hours** Below is the row for `s(sleep_z):time` from the model output.

```
## s(sleep_z):time  1.000  1.000  0.212  0.645
```

Below are plots of a plot of `s(bl_age)`, `s(bl_age):sleep_z`, `s(bl_age):time`, and `s(sleep_z):time`. For `s(sleep_z):time`, roughly, if we cannot fit a straight line through the confidence bands, there is evidence that the effect of time depends on sleep duration. It is correct that the confidence interval is zero at one point along the axis; this happens because we do not include the main effect.



## Controlling for BMI

**Full data** Below is the model output. The term `s(sleep_z):time` is probably what we care most about.

```
##
## Family: gaussian
## Link function: identity
##
## Formula:
## value ~ sex + site + bmi + icv + s(bl_age, k = 10, bs = "cr") +
##   s(bl_age, by = sleep_z, bs = "cr") + s(bl_age, by = time,
##   k = 5, bs = "cr") + s(sleep_z, by = time, k = 5, bs = "cr",
##   pc = 0)
```

```

## <environment: 0x563916b210c0>
##
## Parametric coefficients:
##           Estimate Std. Error t value Pr(>|t|)
## (Intercept) 7626.4513   101.6712  75.011 < 2e-16 ***
## sexmale      46.1591    29.2421   1.579  0.115
## siteousPrisma -0.9683   121.2842 -0.008  0.994
## siteousSkyra 377.2601    38.8418   9.713 < 2e-16 ***
## siteUCAM     384.7857    75.7643   5.079 3.93e-07 ***
## siteUKB      458.8471    69.9005   6.564 5.72e-11 ***
## siteUmU      578.6973    87.4513   6.617 4.01e-11 ***
## bmi          0.9308     3.0534   0.305  0.761
## icv          442.0685    14.1570  31.226 < 2e-16 ***
## ---
## Signif. codes:  0 '***' 0.001 '**' 0.01 '*' 0.05 '.' 0.1 ' ' 1
##
## Approximate significance of smooth terms:
##           edf Ref.df      F p-value
## s(bl_age)      4.269  4.269 144.147 <2e-16 ***
## s(bl_age):sleep_z 2.000  2.000   0.927  0.396
## s(bl_age):time  4.037  4.037 143.559 <2e-16 ***
## s(sleep_z):time 1.863  1.863   1.331  0.283
## ---
## Signif. codes:  0 '***' 0.001 '**' 0.01 '*' 0.05 '.' 0.1 ' ' 1
##
## R-sq.(adj) =  0.43
## lmer.REML = 79045 Scale est. = 22153      n = 5408

```

Below are plots of a plot of `s(bl_age)`, `s(bl_age):sleep_z`, `s(bl_age):time`, and `s(sleep_z):time`. For `s(sleep_z):time`, roughly, if we cannot fit a straight line through the confidence bands, there is evidence that the effect of time depends on sleep duration. It is correct that the confidence interval is zero at one point along the axis; this happens because we do not include the main effect.

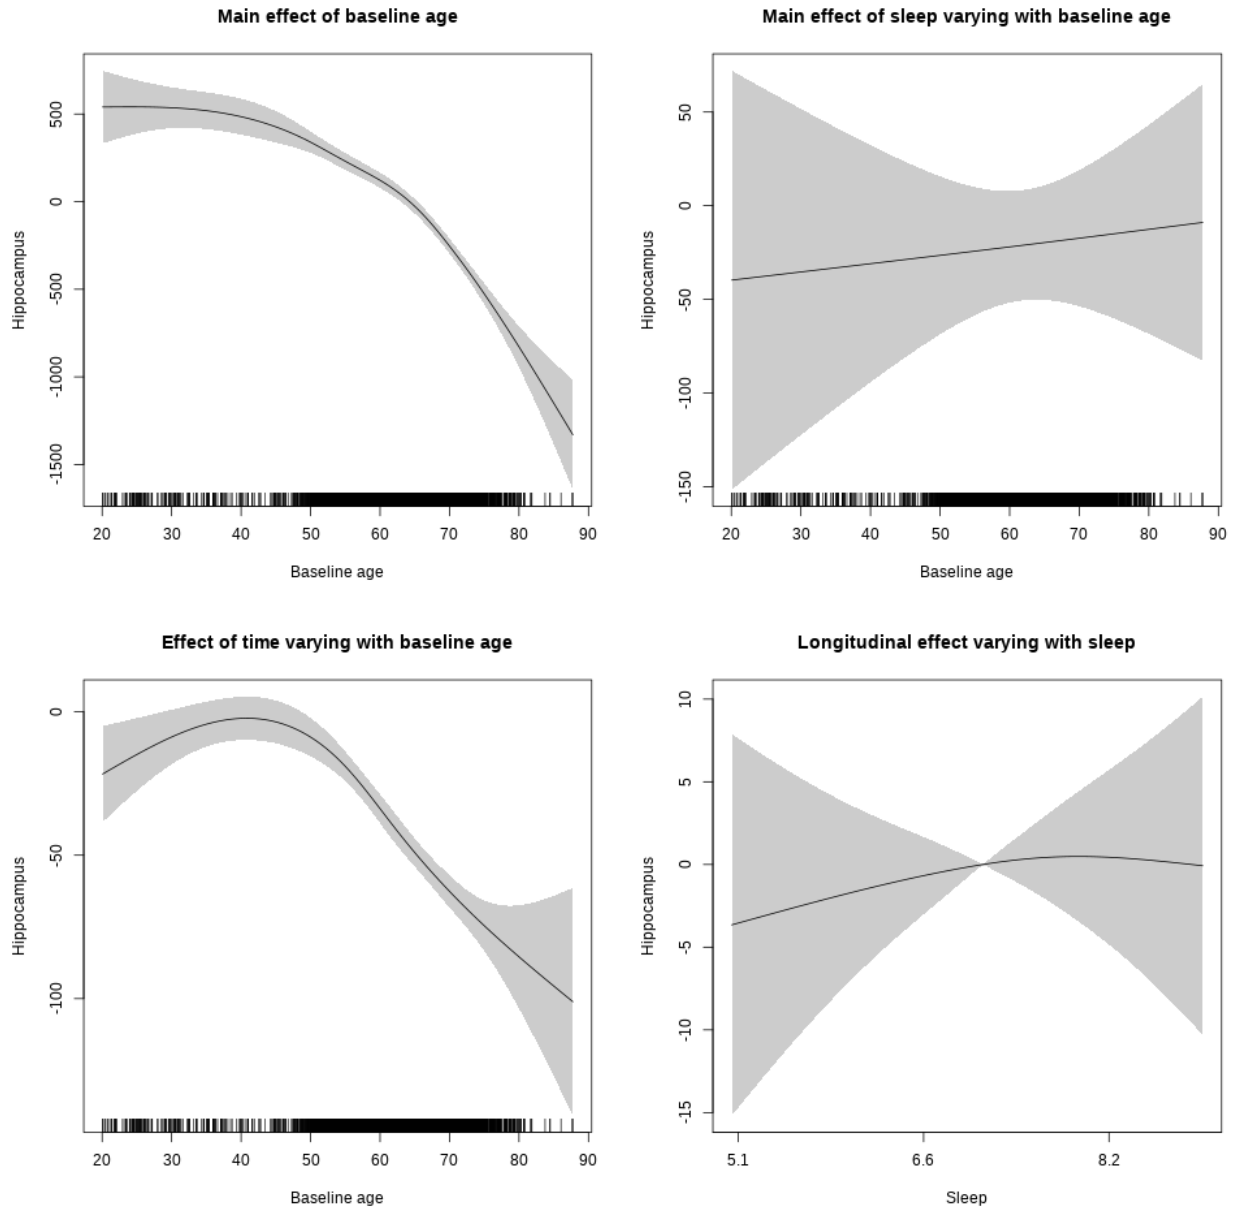

**Restricted to sleep  $\geq 5$  and  $\leq 9$  hours** Below is the row for `s(sleep_z):time` from the model output.

```
## s(sleep_z):time  1.236  1.236  0.341  0.737
```

Below are plots of a plot of `s(bl_age)`, `s(bl_age):sleep_z`, `s(bl_age):time`, and `s(sleep_z):time`. For `s(sleep_z):time`, roughly, if we cannot fit a straight line through the confidence bands, there is evidence that the effect of time depends on sleep duration. It is correct that the confidence interval is zero at one point along the axis; this happens because we do not include the main effect.

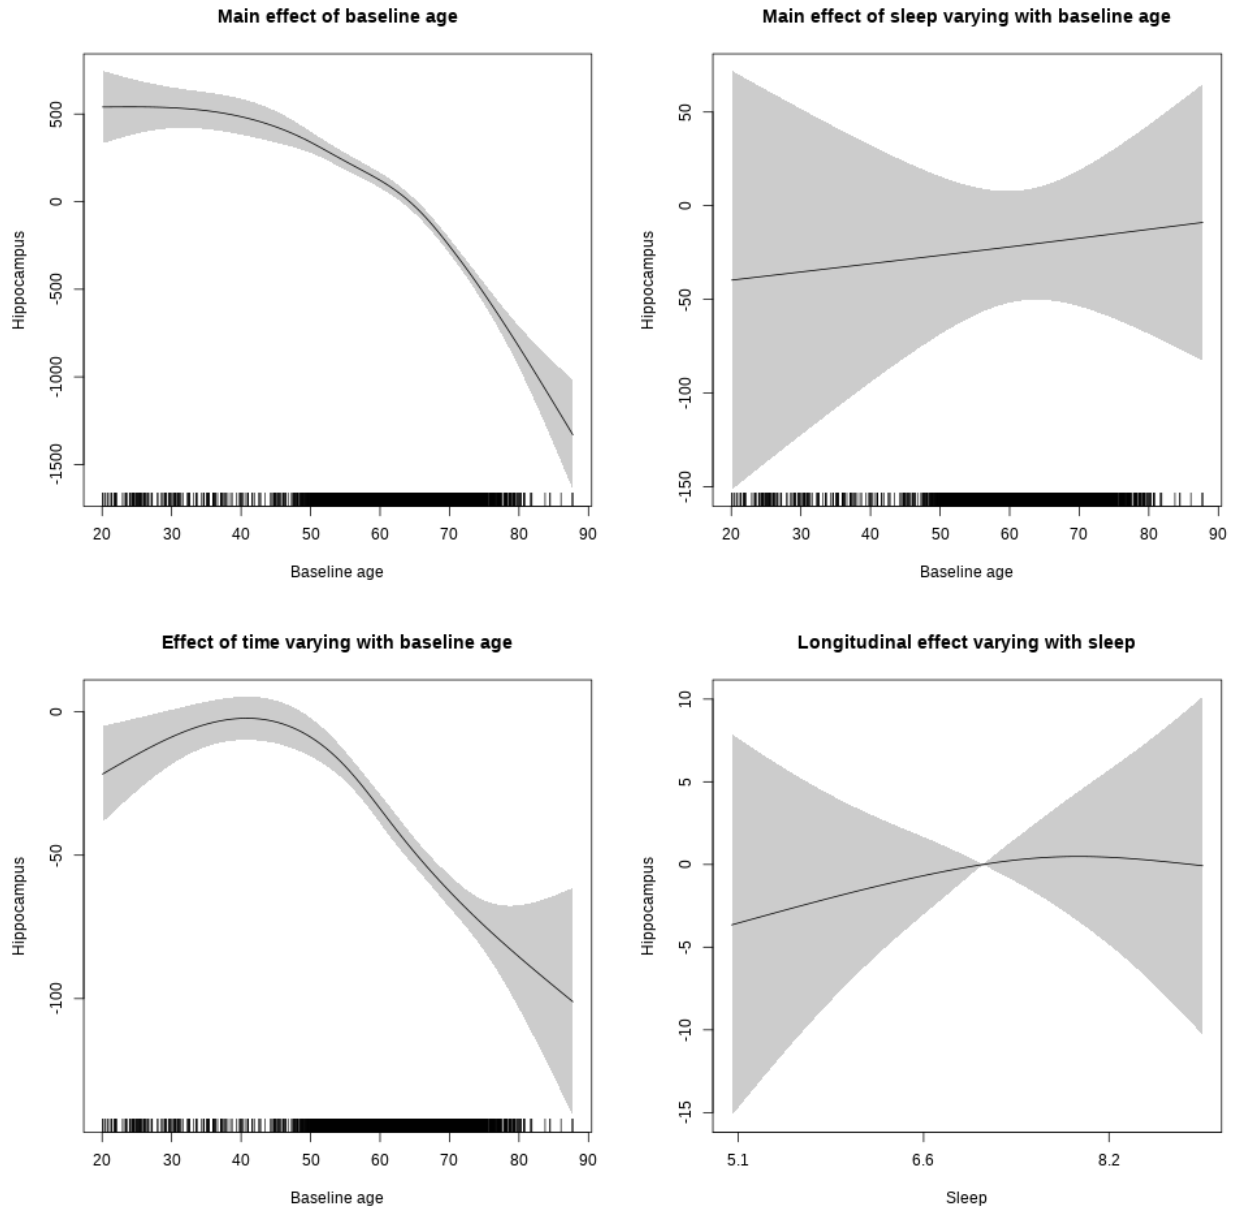

## Controlling for depression

**Full data** Below is the model output. The term `s(sleep_z):time` is probably what we care most about.

```
##
## Family: gaussian
## Link function: identity
##
## Formula:
## value ~ sex + site + depression + icv + s(bl_age, k = 10, bs = "cr") +
##       s(bl_age, by = sleep_z, bs = "cr") + +s(bl_age, by = time,
##       k = 5, bs = "cr") + s(sleep_z, by = time, k = 5, bs = "cr",
##       pc = 0)
```

```

## <environment: 0x563910fa6960>
##
## Parametric coefficients:
##           Estimate Std. Error t value Pr(>|t|)
## (Intercept)  8495.52     56.08 151.484 < 2e-16 ***
## sexmale      40.26      29.28   1.375 0.169184
## siteousAvanto -828.88    114.71  -7.226 5.63e-13 ***
## siteousPrisma -656.52    178.58  -3.676 0.000239 ***
## siteousSkyra  -428.16    103.20  -4.149 3.39e-05 ***
## siteUCAM     -418.75     68.34  -6.127 9.56e-10 ***
## siteUKB      -376.04     51.72  -7.271 4.06e-13 ***
## siteUmU      -124.89     82.73  -1.510 0.131214
## depression   -358.71    103.78  -3.456 0.000552 ***
## icv          411.32     13.86  29.676 < 2e-16 ***
## ---
## Signif. codes:  0 '***' 0.001 '**' 0.01 '*' 0.05 '.' 0.1 ' ' 1
##
## Approximate significance of smooth terms:
##           edf Ref.df      F p-value
## s(bl_age)      4.724  4.724 138.834 <2e-16 ***
## s(bl_age):sleep_z 2.000  2.000   3.771  0.0231 *
## s(bl_age):time  3.835  3.835 159.842 <2e-16 ***
## s(sleep_z):time  1.974  1.974   1.755  0.1822
## ---
## Signif. codes:  0 '***' 0.001 '**' 0.01 '*' 0.05 '.' 0.1 ' ' 1
##
## R-sq.(adj) =  0.415
## lmer.REML = 83105  Scale est. = 21886    n = 5675

```

Below are plots of a plot of `s(bl_age)`, `s(bl_age):sleep_z`, `s(bl_age):time`, and `s(sleep_z):time`. For `s(sleep_z):time`, roughly, if we cannot fit a straight line through the confidence bands, there is evidence that the effect of time depends on sleep duration. It is correct the that confidence interval is zero at one point along the axis; this happens because we do not include the main effect.

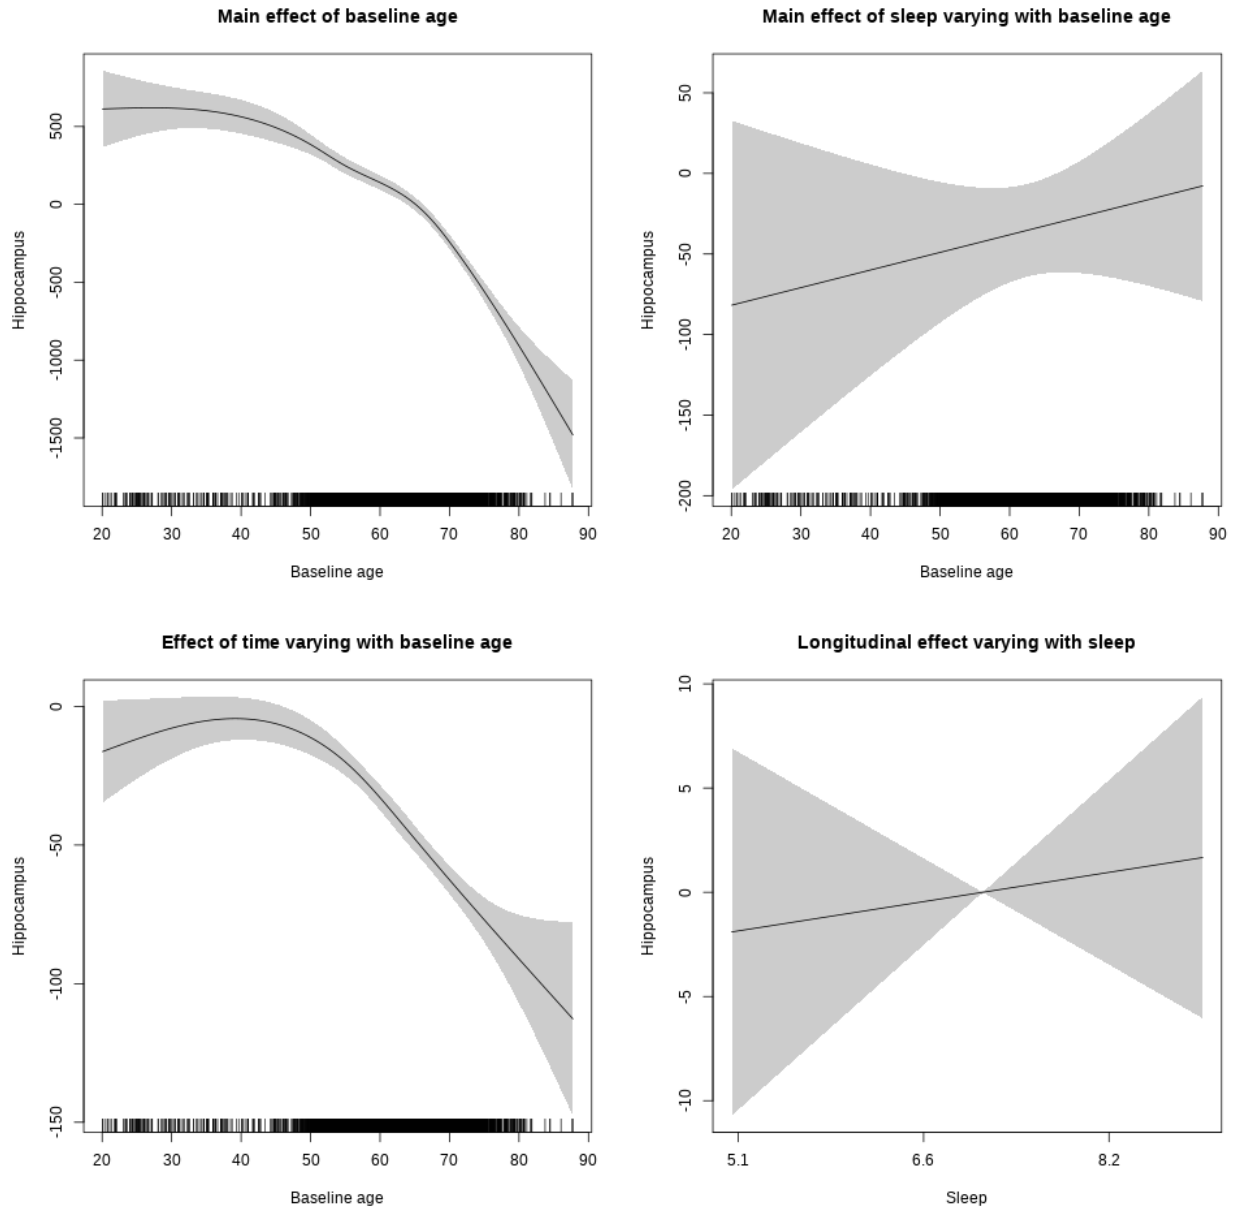

**Restricted to sleep  $\geq 5$  and  $\leq 9$  hours** Below is the row for `s(sleep_z):time` from the model output.

```
## s(sleep_z):time 1.000 1.000 0.186 0.6660
```

Below are plots of a plot of `s(bl_age)`, `s(bl_age):sleep_z`, `s(bl_age):time`, and `s(sleep_z):time`. For `s(sleep_z):time`, roughly, if we cannot fit a straight line through the confidence bands, there is evidence that the effect of time depends on sleep duration. It is correct that the confidence interval is zero at one point along the axis; this happens because we do not include the main effect.



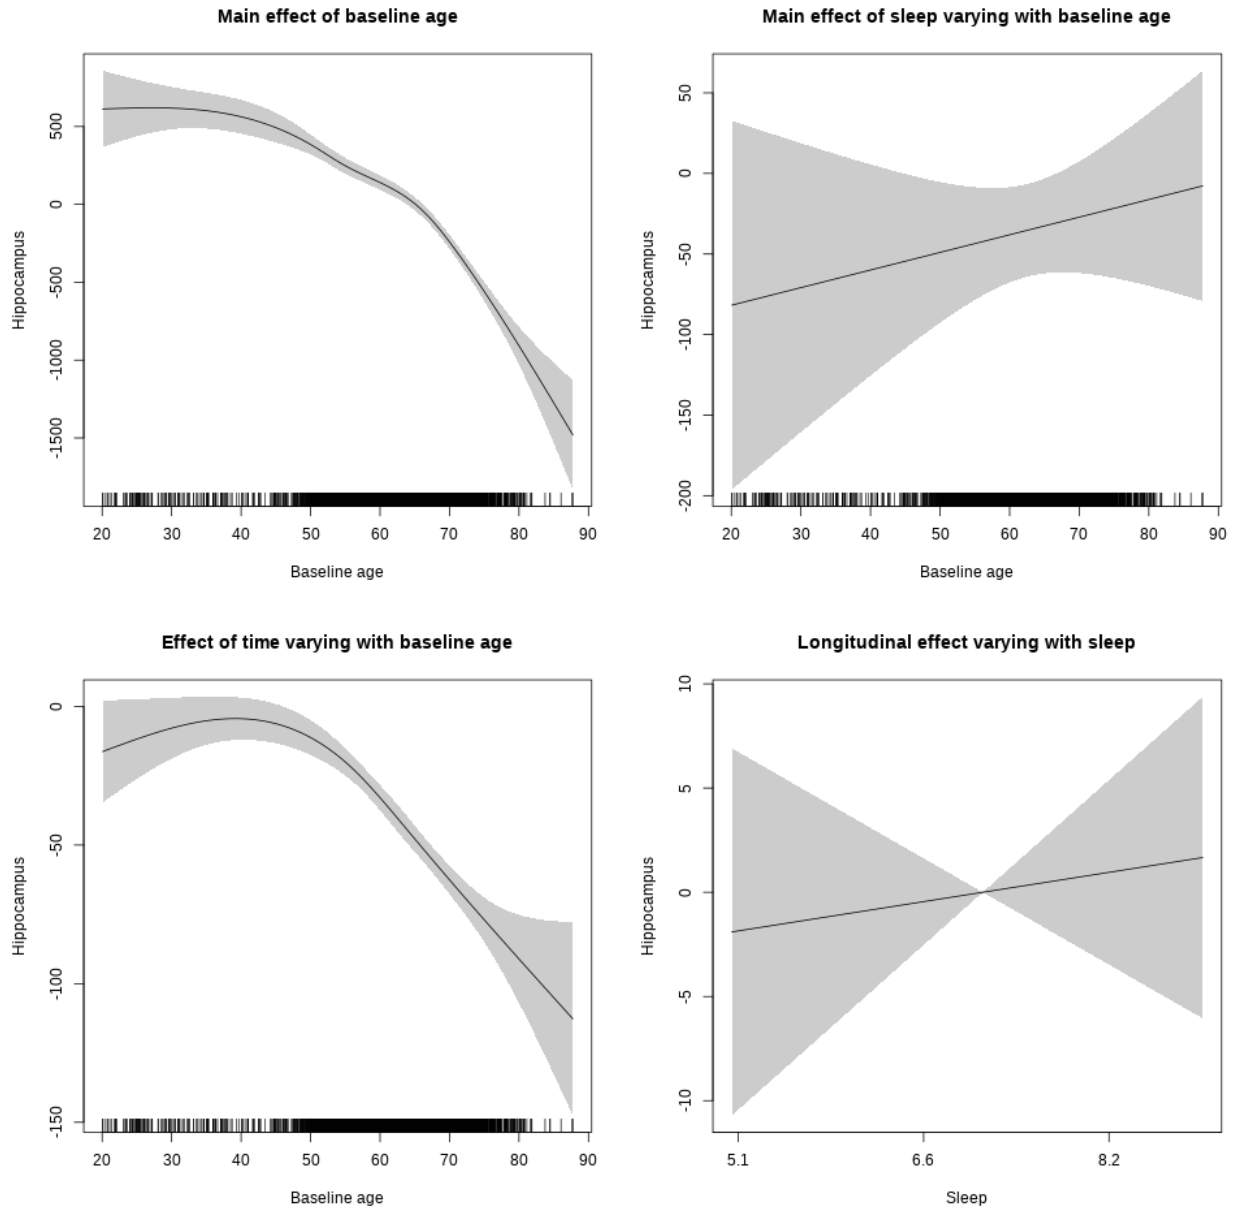

### Controlling for sleep quality

**Full data** Below is the model output. The term `s(sleep_z):time` is probably what we care most about.

```
##
## Family: gaussian
## Link function: identity
##
## Formula:
## value ~ X + s(bl_age, k = 10, bs = "cr") + s(bl_age, by = sleep_z,
##       bs = "cr") + s(bl_age, by = time, k = 5, bs = "cr") + s(sleep_z,
##       by = time, k = 5, bs = "cr", pc = 0)
## <environment: 0x563914d995c8>
```

```

##
## Parametric coefficients:
##               Estimate Std. Error t value Pr(>|t|)
## (Intercept)      7711.273     91.404  84.364 < 2e-16 ***
## Xsexmale          504.237     34.169  14.757 < 2e-16 ***
## XsiteousAvanto    32.488     87.323   0.372  0.70988
## XsiteousPrisma    183.249    142.988   1.282  0.20006
## XsiteousSkyra     179.076     87.515   2.046  0.04080 *
## XsiteUB           124.095    138.851   0.894  0.37152
## XsiteUCAM         233.726     89.777   2.603  0.00926 **
## XsiteUKB          340.495    278.427   1.223  0.22143
## XsiteUmU          220.617     99.523   2.217  0.02669 *
## Xukb_dummy:sleep_accel  3.659     21.472   0.170  0.86471
## Xukb_dummy:chronotype -5.275     28.615  -0.184  0.85376
## Xukb_dummy:dozing   64.470     59.089   1.091  0.27531
## Xukb_dummy:sleeplessness -60.274    36.842  -1.636  0.10191
## Xukb_dummy:snoring  15.768     52.172   0.302  0.76249
## Xukb_dummy:gettingup -2.671     40.079  -0.067  0.94687
## Xnotukb_dummy:PSQI_Global -14.485    11.312  -1.281  0.20041
## ---
## Signif. codes:  0 '***' 0.001 '**' 0.01 '*' 0.05 '.' 0.1 ' ' 1
##
## Approximate significance of smooth terms:
##               edf Ref.df      F p-value
## s(bl_age)      3.982  3.982 135.628 <2e-16 ***
## s(bl_age):sleep_z 2.000  2.000   3.135  0.0436 *
## s(bl_age):time  4.197  4.197 242.666 <2e-16 ***
## s(sleep_z):time  1.000  1.000   0.829  0.3625
## ---
## Signif. codes:  0 '***' 0.001 '**' 0.01 '*' 0.05 '.' 0.1 ' ' 1
##
## R-sq.(adj) =  0.314
## lmer.REML = 62678  Scale est. = 21687    n = 4288

```

Below are plots of a plot of  $s(\text{bl\_age})$ ,  $s(\text{bl\_age}):\text{sleep\_z}$ ,  $s(\text{bl\_age}):\text{time}$ , and  $s(\text{sleep\_z}):\text{time}$ . For  $s(\text{sleep\_z}):\text{time}$ , roughly, if we cannot fit a straight line through the confidence bands, there is evidence that the effect of time depends on sleep duration. It is correct that the confidence interval is zero at one point along the axis; this happens because we do not include the main effect.

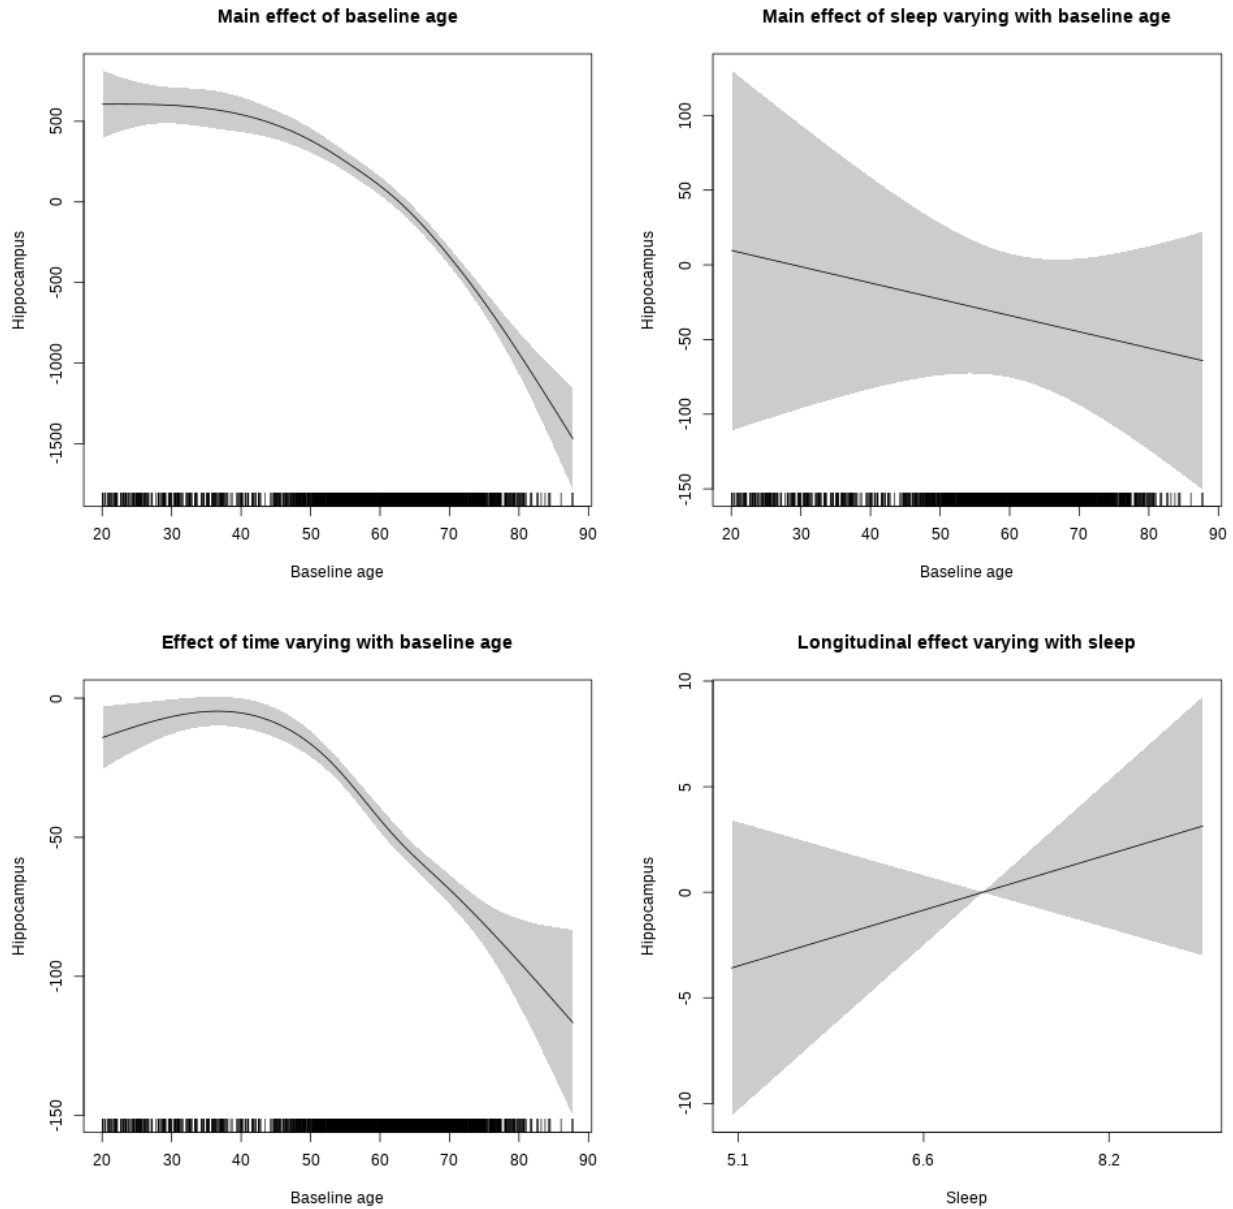

**Restricted to sleep  $\geq 5$  and  $\leq 9$  hours** Below is the row for `s(sleep_z):time` from the model output.

```
## s(sleep_z):time 1.000 1.000 1.049 0.306
```

Below are plots of a plot of `s(bl_age)`, `s(bl_age):sleep_z`, `s(bl_age):time`, and `s(sleep_z):time`. For `s(sleep_z):time`, roughly, if we cannot fit a straight line through the confidence bands, there is evidence that the effect of time depends on sleep duration. It is correct that the confidence interval is zero at one point along the axis; this happens because we do not include the main effect.

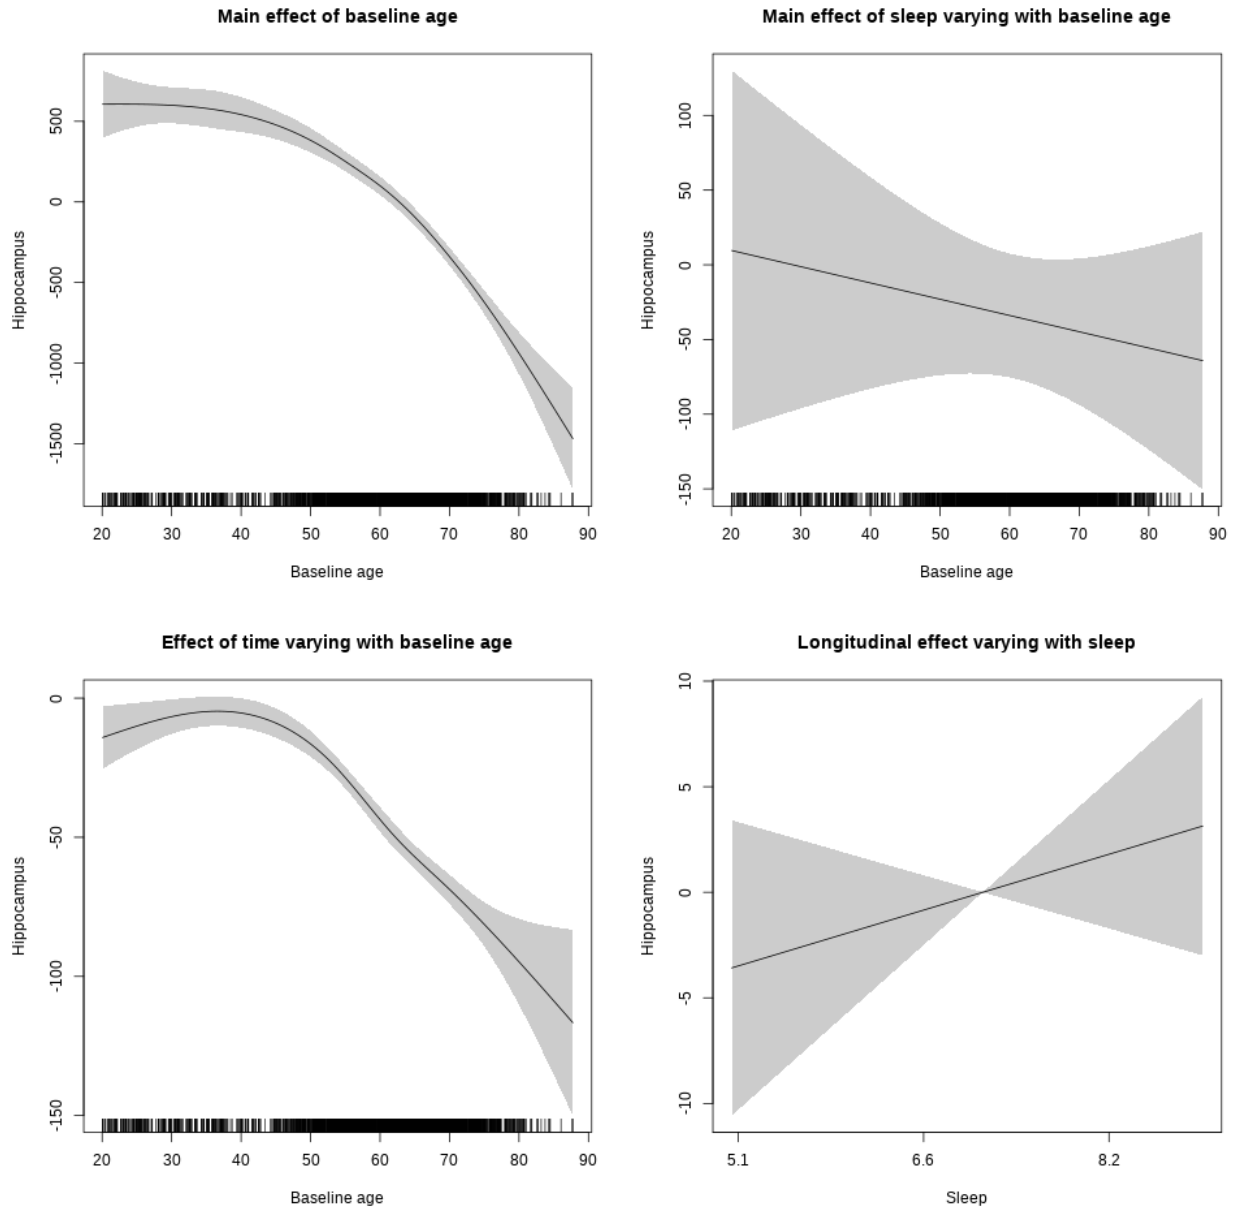

## Pallidum

### Main analysis

**Full data** Below is the model output. The term `s(sleep_z):time` is probably what we care most about.

```
##
## Family: gaussian
## Link function: identity
##
## Formula:
## value ~ sex + site + icv + s(bl_age, k = 10, bs = "cr") + s(bl_age,
##   by = sleep_z, bs = "cr") + +s(bl_age, by = time, k = 5, bs = "cr") +
```

```

##      s(sleep_z, by = time, k = 5, bs = "cr", pc = 0)
## <environment: 0x563911250488>
##
## Parametric coefficients:
##           Estimate Std. Error t value Pr(>|t|)
## (Intercept)  4118.887    25.109 164.038 < 2e-16 ***
## sexmale      95.577     13.079   7.308 2.97e-13 ***
## siteousAvanto -410.669    31.179 -13.171 < 2e-16 ***
## siteousPrisma -552.765    87.023  -6.352 2.24e-10 ***
## siteousSkyra  -315.404    30.276 -10.417 < 2e-16 ***
## siteUB       -381.617    58.618  -6.510 7.95e-11 ***
## siteUCAM     -284.678    31.384  -9.071 < 2e-16 ***
## siteUKB      -129.191    23.436  -5.512 3.65e-08 ***
## siteUmU      -319.398    36.273  -8.805 < 2e-16 ***
## icv          257.020     6.305  40.762 < 2e-16 ***
## ---
## Signif. codes:  0 '***' 0.001 '**' 0.01 '*' 0.05 '.' 0.1 ' ' 1
##
## Approximate significance of smooth terms:
##           edf Ref.df      F p-value
## s(bl_age)      1.000  1.000 264.764 <2e-16 ***
## s(bl_age):sleep_z 2.000  2.000   1.734  0.1766
## s(bl_age):time  3.686  3.686  20.472 <2e-16 ***
## s(sleep_z):time  1.000  1.000   5.464  0.0194 *
## ---
## Signif. codes:  0 '***' 0.001 '**' 0.01 '*' 0.05 '.' 0.1 ' ' 1
##
## R-sq.(adj) =  0.456
## lmer.REML = 1.1109e+05  Scale est. = 11296      n = 8157

```

Below are plots of a plot of  $s(\text{bl\_age})$ ,  $s(\text{bl\_age}):\text{sleep\_z}$ ,  $s(\text{bl\_age}):\text{time}$ , and  $s(\text{sleep\_z}):\text{time}$ . For  $s(\text{sleep\_z}):\text{time}$ , roughly, if we cannot fit a straight line through the confidence bands, there is evidence that the effect of time depends on sleep duration. It is correct that the confidence interval is zero at one point along the axis; this happens because we do not include the main effect.

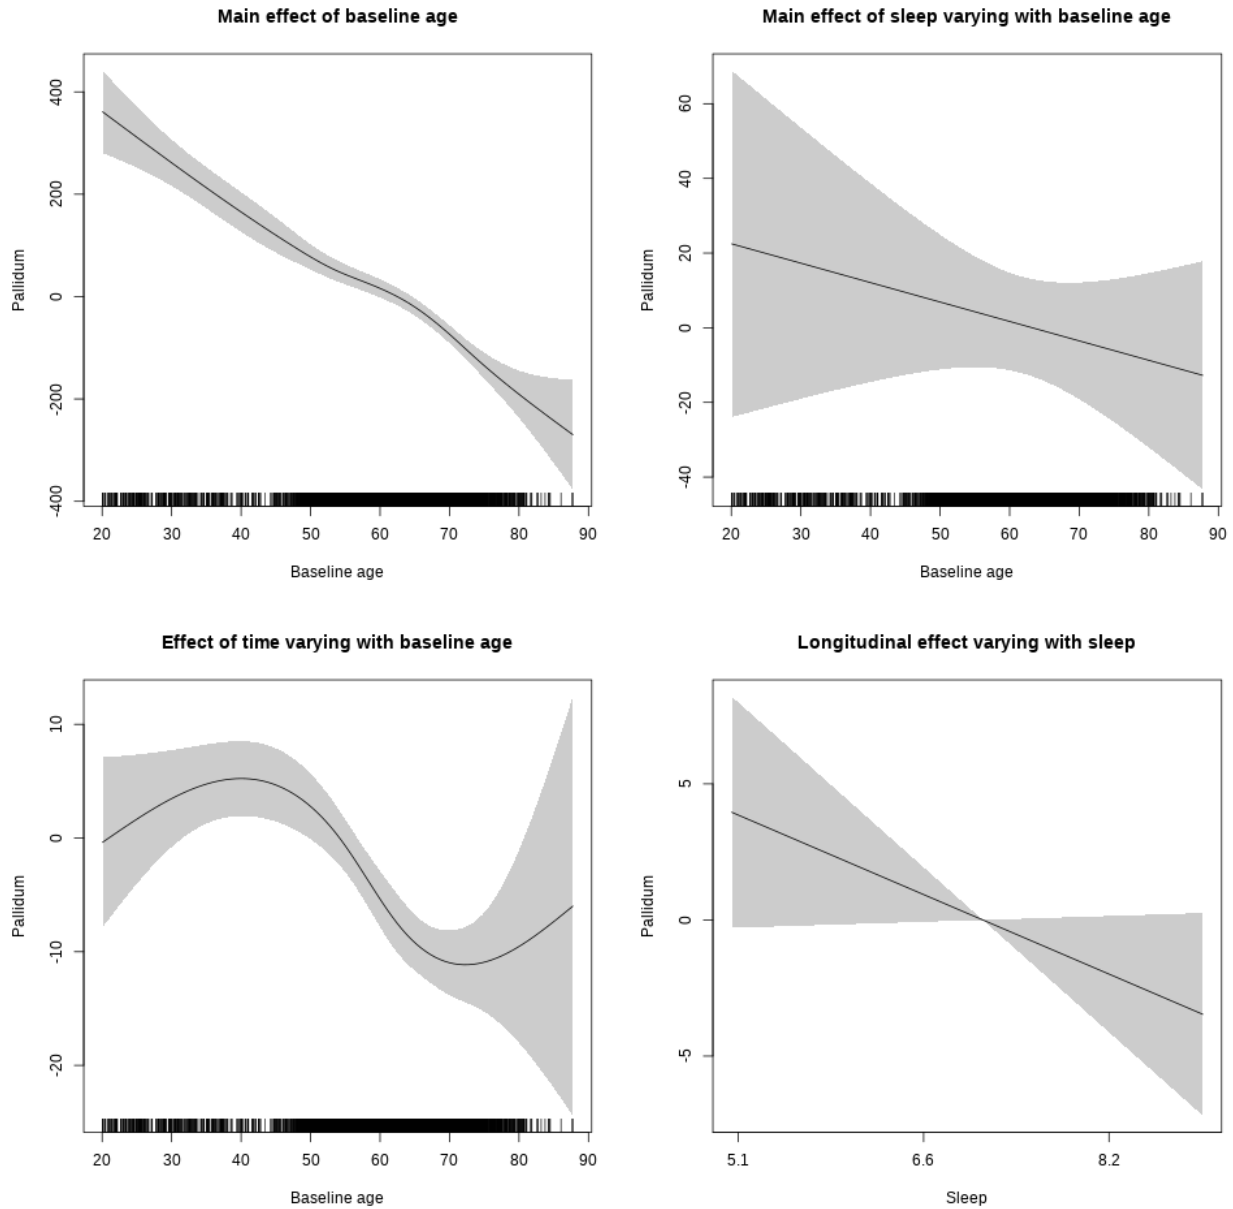

**Restricted to sleep  $\geq 5$  and  $\leq 9$  hours** Below is the row for `s(sleep_z):time` from the model output.

```
## s(sleep_z):time  1.000  1.000  3.470  0.0625 .
```

Below are plots of a plot of `s(bl_age)`, `s(bl_age):sleep_z`, `s(bl_age):time`, and `s(sleep_z):time`. For `s(sleep_z):time`, roughly, if we cannot fit a straight line through the confidence bands, there is evidence that the effect of time depends on sleep duration. It is correct that the confidence interval is zero at one point along the axis; this happens because we do not include the main effect.

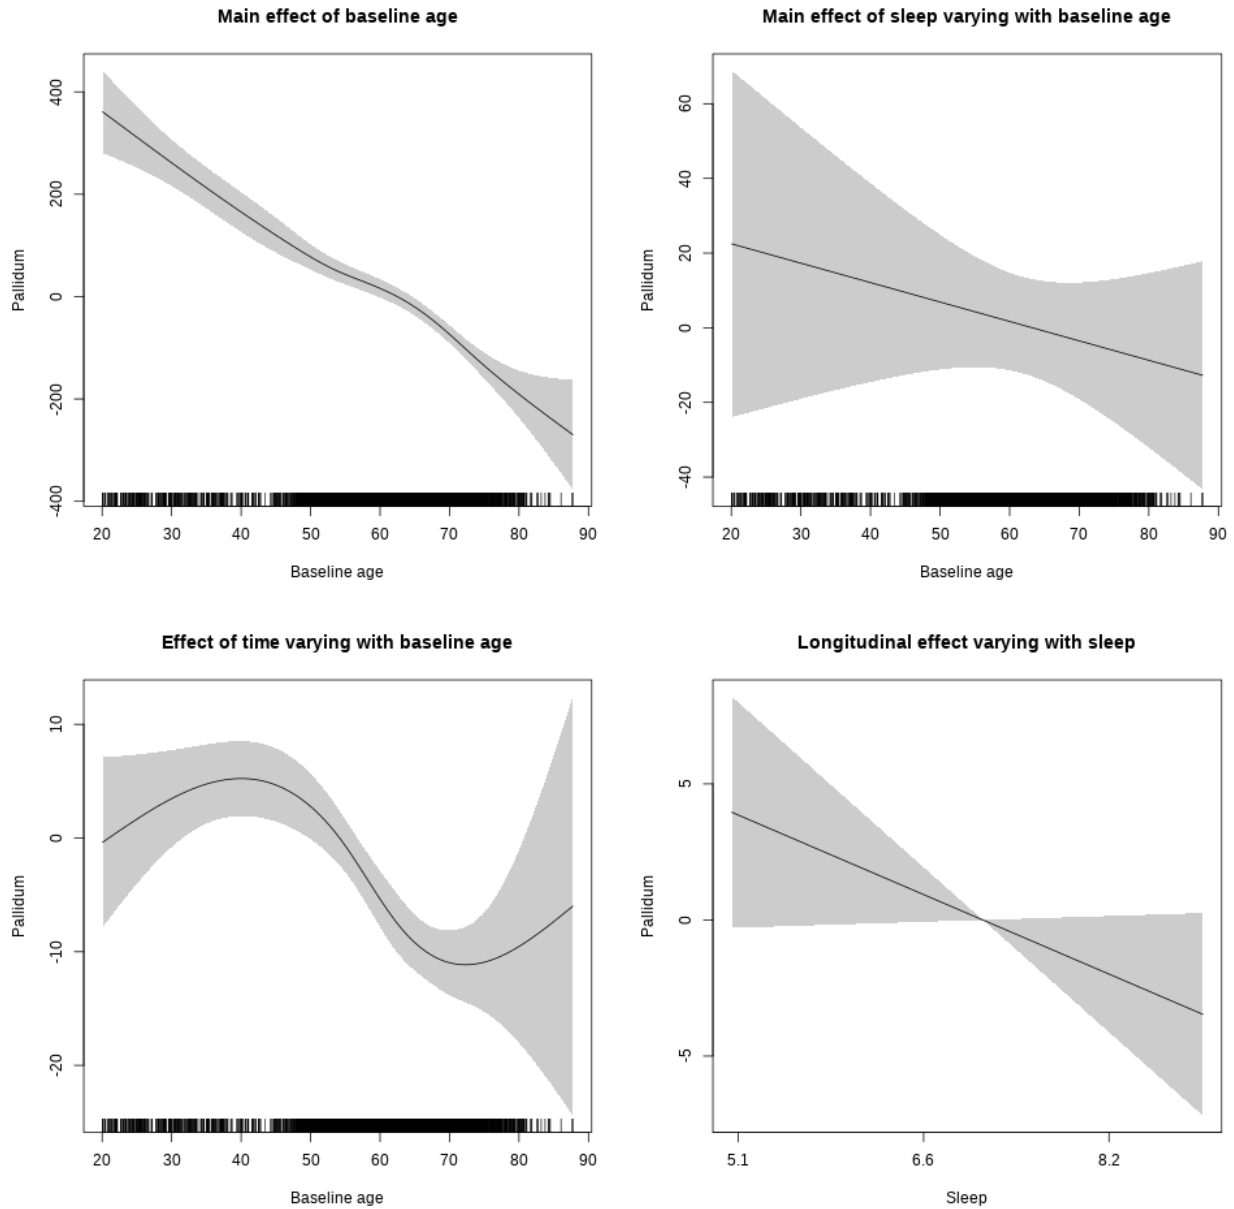

### Controlling for socioeconomic status

**Full data** Below is the model output. The term `s(sleep_z):time` is probably what we care most about.

```
##
## Family: gaussian
## Link function: identity
##
## Formula:
## value ~ sex + site + income_scaled + education_scaled + icv +
##       s(bl_age, k = 10, bs = "cr") + s(bl_age, by = sleep_z, bs = "cr") +
##       +s(bl_age, by = time, k = 5, bs = "cr") + s(sleep_z, by = time,
##       k = 5, bs = "cr", pc = 0)
```

```

## <environment: 0x56391159b7a8>
##
## Parametric coefficients:
##           Estimate Std. Error t value Pr(>|t|)
## (Intercept)  4137.759    57.358  72.139 < 2e-16 ***
## sexmale      81.481     16.046   5.078 3.97e-07 ***
## siteousAvanto -429.395    64.157  -6.693 2.45e-11 ***
## siteousPrisma -837.935   146.328  -5.726 1.09e-08 ***
## siteousSkyra -324.768    59.114  -5.494 4.14e-08 ***
## siteUKB      -190.549    53.980  -3.530 0.00042 ***
## income_scaled  8.774     19.619   0.447 0.65473
## education_scaled 51.554    22.783   2.263 0.02369 *
## icv          271.256     8.028  33.787 < 2e-16 ***
## ---
## Signif. codes:  0 '***' 0.001 '**' 0.01 '*' 0.05 '.' 0.1 ' ' 1
##
## Approximate significance of smooth terms:
##           edf Ref.df      F p-value
## s(bl_age)      1.000  1.000 103.154 < 2e-16 ***
## s(bl_age):sleep_z 2.000  2.000   0.858  0.4243
## s(bl_age):time  2.834  2.834   9.683 4.18e-06 ***
## s(sleep_z):time  2.240  2.240   3.408  0.0176 *
## ---
## Signif. codes:  0 '***' 0.001 '**' 0.01 '*' 0.05 '.' 0.1 ' ' 1
##
## R-sq.(adj) =  0.465
## lmer.REML = 63382 Scale est. = 11989      n = 4654

```

Below are plots of a plot of  $s(\text{bl\_age})$ ,  $s(\text{bl\_age}):\text{sleep\_z}$ ,  $s(\text{bl\_age}):\text{time}$ , and  $s(\text{sleep\_z}):\text{time}$ . For  $s(\text{sleep\_z}):\text{time}$ , roughly, if we cannot fit a straight line through the confidence bands, there is evidence that the effect of time depends on sleep duration. It is correct that the confidence interval is zero at one point along the axis; this happens because we do not include the main effect.



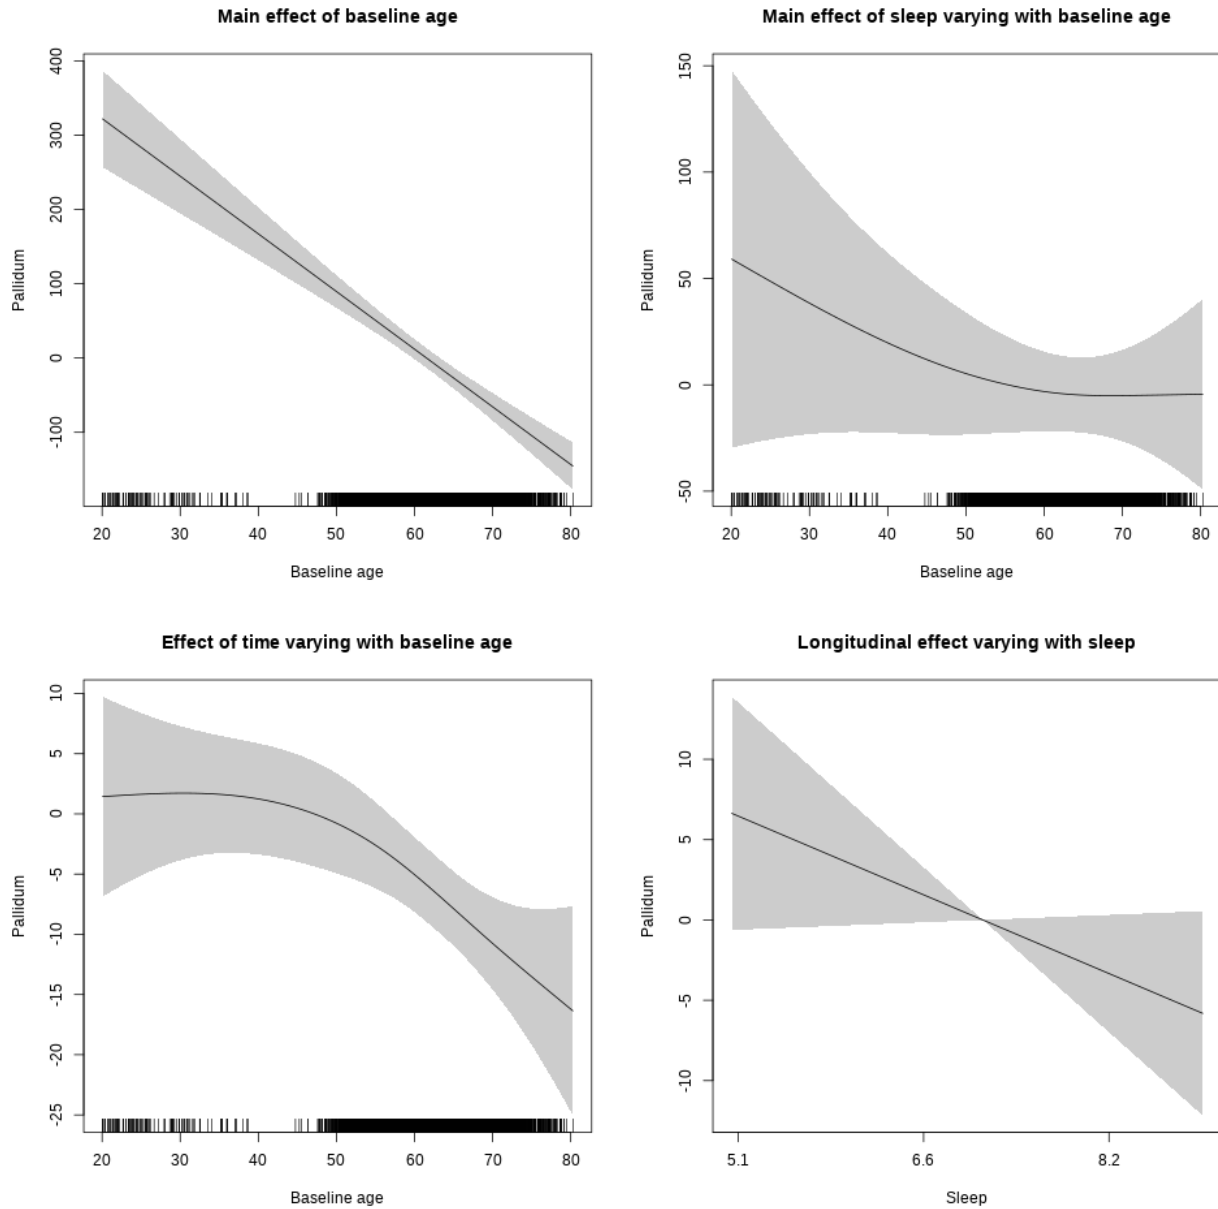

**Restricted to sleep  $\geq 5$  and  $\leq 9$  hours** Below is the row for `s(sleep_z):time` from the model output.

```
## s(sleep_z):time  1.000  1.000  3.340  0.0677 .
```

Below are plots of a plot of `s(bl_age)`, `s(bl_age):sleep_z`, `s(bl_age):time`, and `s(sleep_z):time`. For `s(sleep_z):time`, roughly, if we cannot fit a straight line through the confidence bands, there is evidence that the effect of time depends on sleep duration. It is correct that the confidence interval is zero at one point along the axis; this happens because we do not include the main effect.



## Controlling for BMI

**Full data** Below is the model output. The term `s(sleep_z):time` is probably what we care most about.

```
##
## Family: gaussian
## Link function: identity
##
## Formula:
## value ~ sex + site + bmi + icv + s(bl_age, k = 10, bs = "cr") +
##   s(bl_age, by = sleep_z, bs = "cr") + s(bl_age, by = time,
##     k = 5, bs = "cr") + s(sleep_z, by = time, k = 5, bs = "cr",
##     pc = 0)
```

```

## <environment: 0x563916b23638>
##
## Parametric coefficients:
##           Estimate Std. Error t value Pr(>|t|)
## (Intercept) 3829.254    54.745  69.947 < 2e-16 ***
## sexmale      81.895     15.286   5.358 8.79e-08 ***
## siteousPrisma -111.371    86.956  -1.281 0.200331
## siteousSkyra  147.877    27.455   5.386 7.50e-08 ***
## siteUCAM     140.532    42.071   3.340 0.000843 ***
## siteUKB      273.815    39.411   6.948 4.15e-12 ***
## siteUmU      111.823    48.052   2.327 0.019996 *
## bmi          -4.360     1.580  -2.760 0.005807 **
## icv          277.932     7.578  36.677 < 2e-16 ***
## ---
## Signif. codes:  0 '***' 0.001 '**' 0.01 '*' 0.05 '.' 0.1 ' ' 1
##
## Approximate significance of smooth terms:
##           edf Ref.df    F p-value
## s(bl_age)      2.569  2.569 52.411 <2e-16 ***
## s(bl_age):sleep_z 2.000  2.000  0.909  0.4030
## s(bl_age):time  2.000  2.000 20.131 <2e-16 ***
## s(sleep_z):time 1.000  1.000  5.829  0.0158 *
## ---
## Signif. codes:  0 '***' 0.001 '**' 0.01 '*' 0.05 '.' 0.1 ' ' 1
##
## R-sq.(adj) =  0.467
## lmer.REML = 73870 Scale est. = 11682    n = 5416

```

Below are plots of a plot of `s(bl_age)`, `s(bl_age):sleep_z`, `s(bl_age):time`, and `s(sleep_z):time`. For `s(sleep_z):time`, roughly, if we cannot fit a straight line through the confidence bands, there is evidence that the effect of time depends on sleep duration. It is correct that the confidence interval is zero at one point along the axis; this happens because we do not include the main effect.

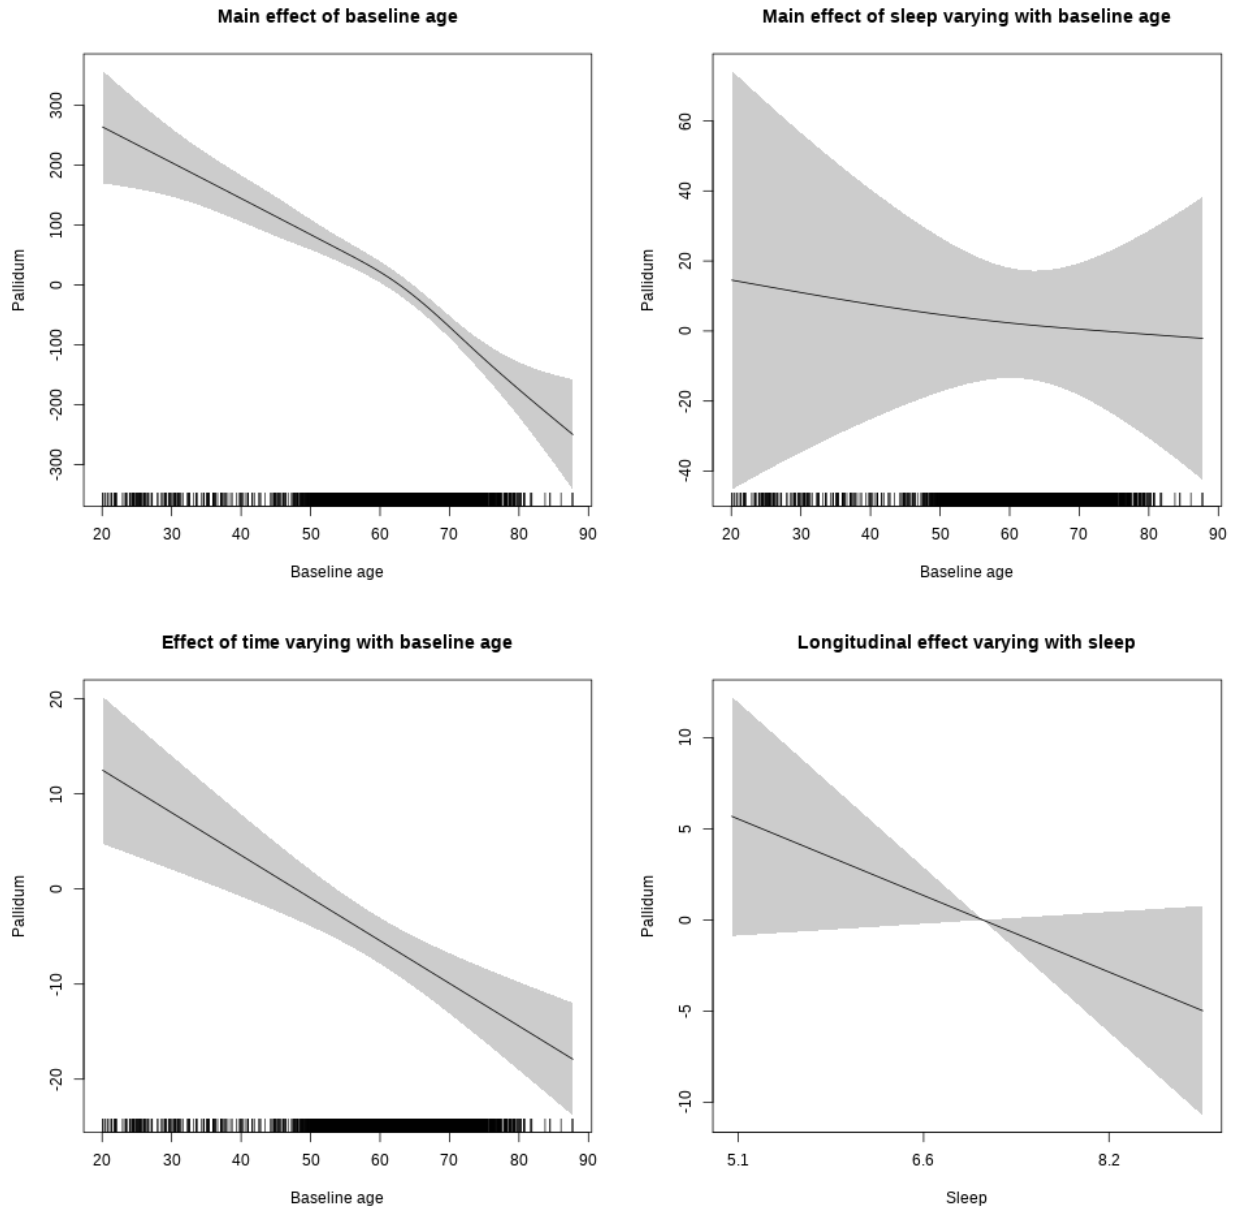

**Restricted to sleep  $\geq 5$  and  $\leq 9$  hours** Below is the row for `s(sleep_z):time` from the model output.

```
## s(sleep_z):time  1.000  1.000  3.001  0.0833 .
```

Below are plots of a plot of `s(bl_age)`, `s(bl_age):sleep_z`, `s(bl_age):time`, and `s(sleep_z):time`. For `s(sleep_z):time`, roughly, if we cannot fit a straight line through the confidence bands, there is evidence that the effect of time depends on sleep duration. It is correct that the confidence interval is zero at one point along the axis; this happens because we do not include the main effect.



## Controlling for depression

**Full data** Below is the model output. The term `s(sleep_z):time` is probably what we care most about.

```
##
## Family: gaussian
## Link function: identity
##
## Formula:
## value ~ sex + site + depression + icv + s(bl_age, k = 10, bs = "cr") +
##   s(bl_age, by = sleep_z, bs = "cr") + +s(bl_age, by = time,
##     k = 5, bs = "cr") + s(sleep_z, by = time, k = 5, bs = "cr",
##     pc = 0)
```

```

## <environment: 0x563910fa3ea8>
##
## Parametric coefficients:
##           Estimate Std. Error t value Pr(>|t|)
## (Intercept)  4101.058    29.794 137.646 < 2e-16 ***
## sexmale      85.660     15.566   5.503 3.90e-08 ***
## siteousAvanto -229.444    64.669  -3.548 0.000391 ***
## siteousPrisma -260.829   116.872  -2.232 0.025671 *
## siteousSkyra -189.398    54.566  -3.471 0.000522 ***
## siteUCAM     -250.953    36.045  -6.962 3.73e-12 ***
## siteUKB      -119.263    27.391  -4.354 1.36e-05 ***
## siteUmU      -283.708    43.619  -6.504 8.48e-11 ***
## depression   -8.407     54.627  -0.154 0.877693
## icv          258.907     7.530  34.385 < 2e-16 ***
## ---
## Signif. codes:  0 '***' 0.001 '**' 0.01 '*' 0.05 '.' 0.1 ' ' 1
##
## Approximate significance of smooth terms:
##           edf Ref.df    F p-value
## s(bl_age)      4.452  4.452 30.062 <2e-16 ***
## s(bl_age):sleep_z 2.000  2.000  0.778  0.4593
## s(bl_age):time  2.000  2.000 24.324 <2e-16 ***
## s(sleep_z):time 1.000  1.000  4.300  0.0382 *
## ---
## Signif. codes:  0 '***' 0.001 '**' 0.01 '*' 0.05 '.' 0.1 ' ' 1
##
## R-sq.(adj) =  0.442
## lmer.REML = 77719  Scale est. = 11387    n = 5683

```

Below are plots of a plot of `s(bl_age)`, `s(bl_age):sleep_z`, `s(bl_age):time`, and `s(sleep_z):time`. For `s(sleep_z):time`, roughly, if we cannot fit a straight line through the confidence bands, there is evidence that the effect of time depends on sleep duration. It is correct that the confidence interval is zero at one point along the axis; this happens because we do not include the main effect.

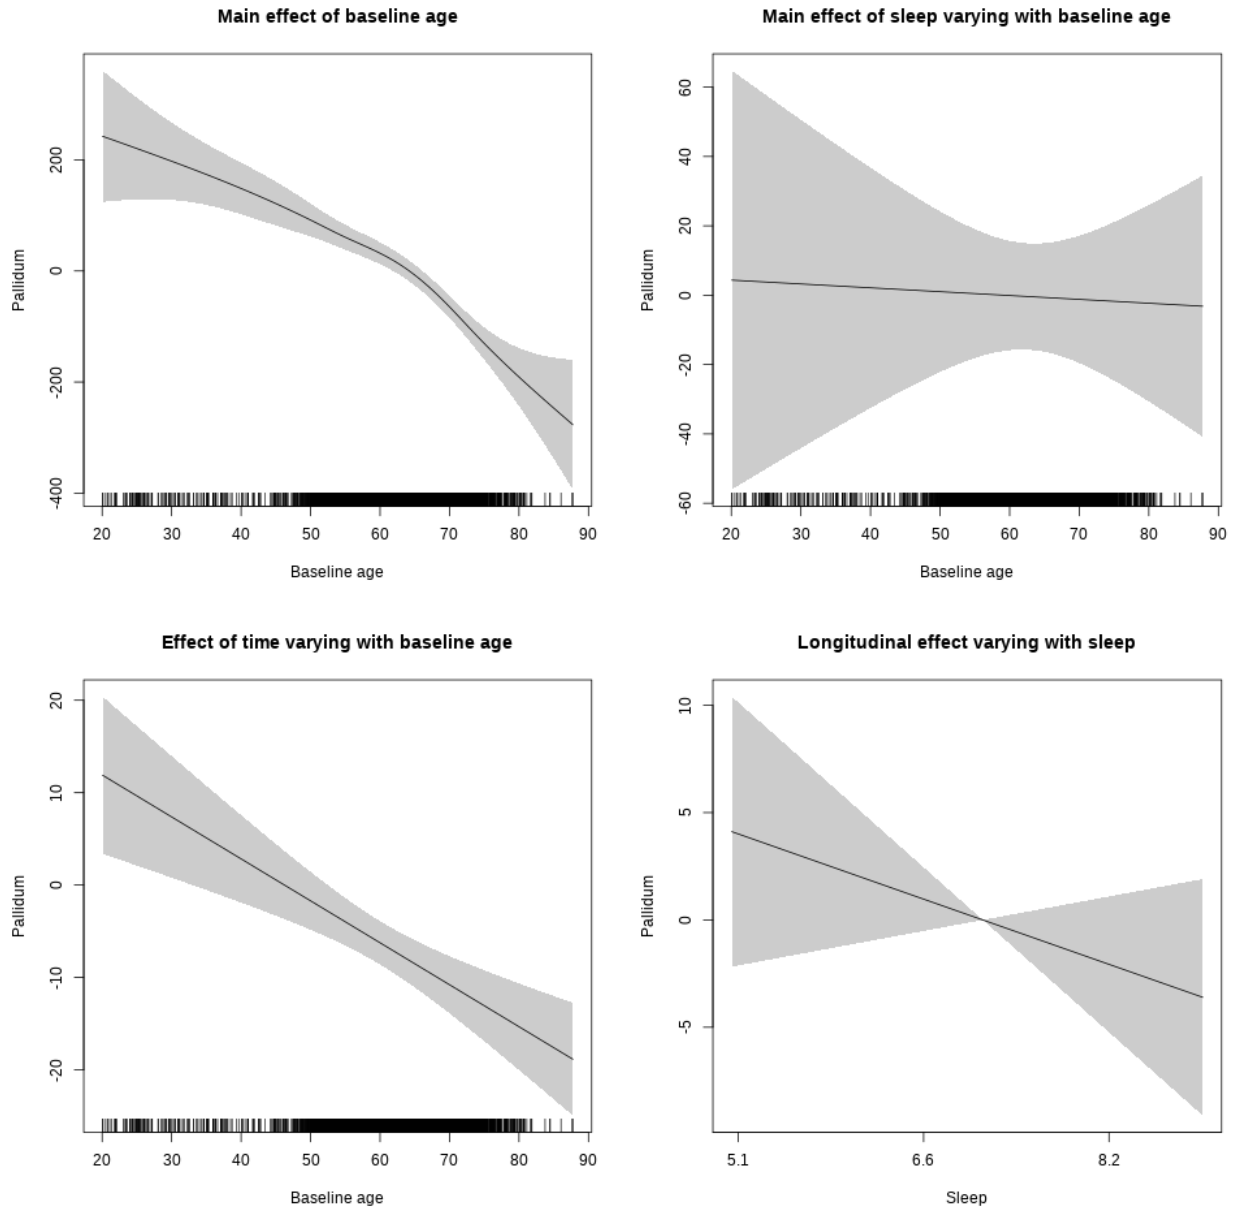

**Restricted to sleep  $\geq 5$  and  $\leq 9$  hours** Below is the row for `s(sleep_z):time` from the model output.

```
## s(sleep_z):time 1.00 1.00 1.711 0.191
```

Below are plots of a plot of `s(bl_age)`, `s(bl_age):sleep_z`, `s(bl_age):time`, and `s(sleep_z):time`. For `s(sleep_z):time`, roughly, if we cannot fit a straight line through the confidence bands, there is evidence that the effect of time depends on sleep duration. It is correct that the confidence interval is zero at one point along the axis; this happens because we do not include the main effect.

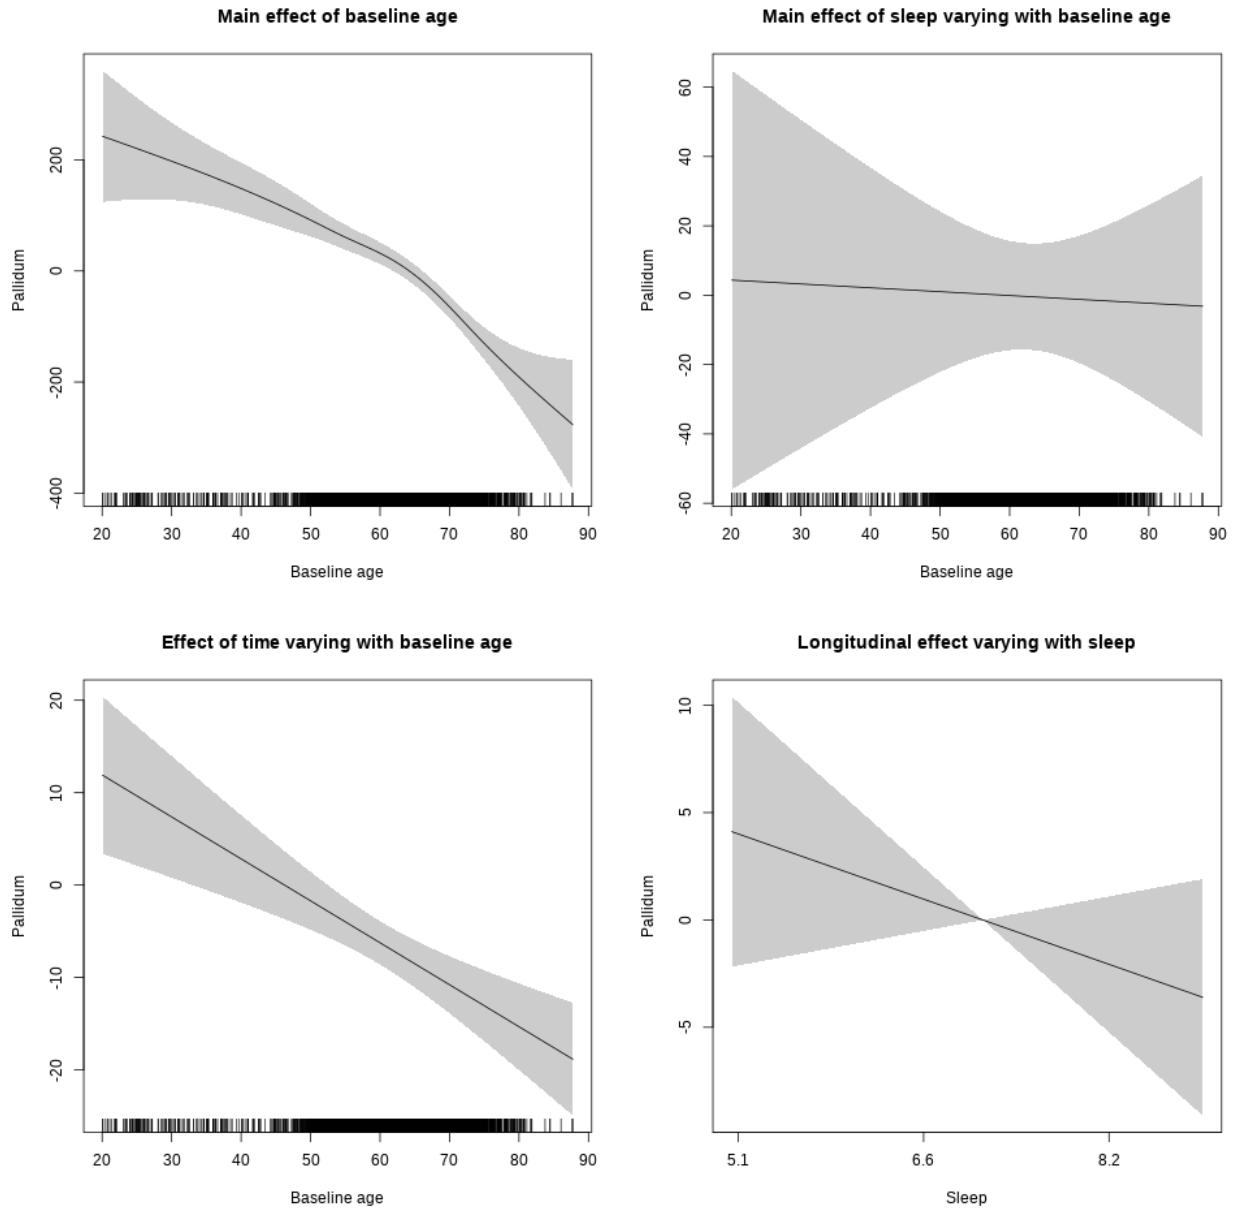

### Controlling for sleep quality

**Full data** Below is the model output. The term `s(sleep_z):time` is probably what we care most about.

```
##
## Family: gaussian
## Link function: identity
##
## Formula:
## value ~ X + s(bl_age, k = 10, bs = "cr") + s(bl_age, by = sleep_z,
##       bs = "cr") + s(bl_age, by = time, k = 5, bs = "cr") + s(sleep_z,
##       by = time, k = 5, bs = "cr", pc = 0)
## <environment: 0x563914d995c8>
```



```

##
## Parametric coefficients:
##               Estimate Std. Error t value Pr(>|t|)
## (Intercept)      3611.635     51.121  70.649 < 2e-16 ***
## Xsexmale          393.918     19.204  20.512 < 2e-16 ***
## XsiteousAvanto    120.731     48.807   2.474  0.01341 *
## XsiteousPrisma     78.227     91.740   0.853  0.39387
## XsiteousSkyra     117.125     48.982   2.391  0.01684 *
## XsiteUB           -74.068     77.868  -0.951  0.34156
## XsiteUCAM         150.377     49.470   3.040  0.00238 **
## XsiteUKB          410.632    155.183   2.646  0.00817 **
## XsiteUmU          -20.461     55.348  -0.370  0.71164
## Xukb_dummy:sleep_accel   8.188     12.065   0.679  0.49740
## Xukb_dummy:chronotype  -11.165     16.068  -0.695  0.48716
## Xukb_dummy:dozing      -7.024     33.203  -0.212  0.83247
## Xukb_dummy:sleeplessness -43.394     20.611  -2.105  0.03532 *
## Xukb_dummy:snoring     11.179     29.322   0.381  0.70304
## Xukb_dummy:gettingup   -32.246     22.328  -1.444  0.14876
## Xnotukb_dummy:PSQI_Global -5.466      6.330  -0.864  0.38790
## ---
## Signif. codes:  0 '***' 0.001 '**' 0.01 '*' 0.05 '.' 0.1 ' ' 1
##
## Approximate significance of smooth terms:
##               edf Ref.df      F p-value
## s(bl_age)          1.000  1.000 126.721 <2e-16 ***
## s(bl_age):sleep_z  2.000  2.000   0.903  0.4053
## s(bl_age):time     4.134  4.134  13.766 <2e-16 ***
## s(sleep_z):time    1.000  1.000   4.013  0.0452 *
## ---
## Signif. codes:  0 '***' 0.001 '**' 0.01 '*' 0.05 '.' 0.1 ' ' 1
##
## R-sq.(adj) =  0.257
## lmer.REML = 58690  Scale est. = 10284    n = 4289

```

Below are plots of a plot of  $s(\text{bl\_age})$ ,  $s(\text{bl\_age}):\text{sleep\_z}$ ,  $s(\text{bl\_age}):\text{time}$ , and  $s(\text{sleep\_z}):\text{time}$ . For  $s(\text{sleep\_z}):\text{time}$ , roughly, if we cannot fit a straight line through the confidence bands, there is evidence that the effect of time depends on sleep duration. It is correct that that confidence interval is zero at one point along the axis; this happens because we do not include the main effect.

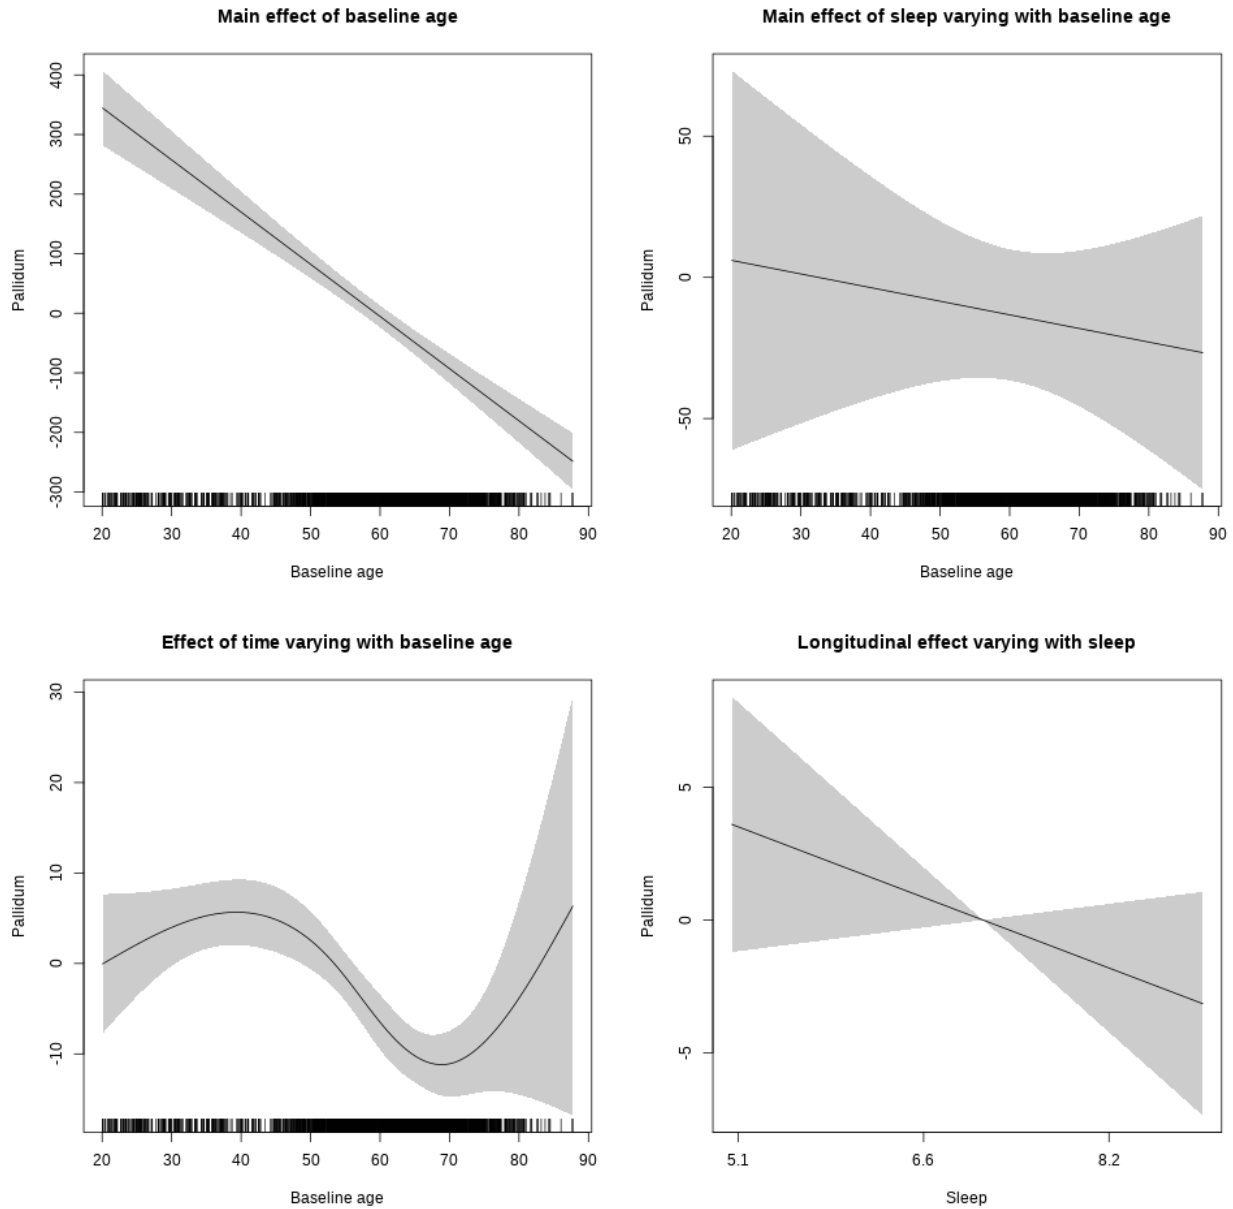

**Restricted to sleep  $\geq 5$  and  $\leq 9$  hours** Below is the row for `s(sleep_z):time` from the model output.

```
## s(sleep_z):time  1.000  1.000  2.242  0.134
```

Below are plots of a plot of `s(bl_age)`, `s(bl_age):sleep_z`, `s(bl_age):time`, and `s(sleep_z):time`. For `s(sleep_z):time`, roughly, if we cannot fit a straight line through the confidence bands, there is evidence that the effect of time depends on sleep duration. It is correct that the confidence interval is zero at one point along the axis; this happens because we do not include the main effect.

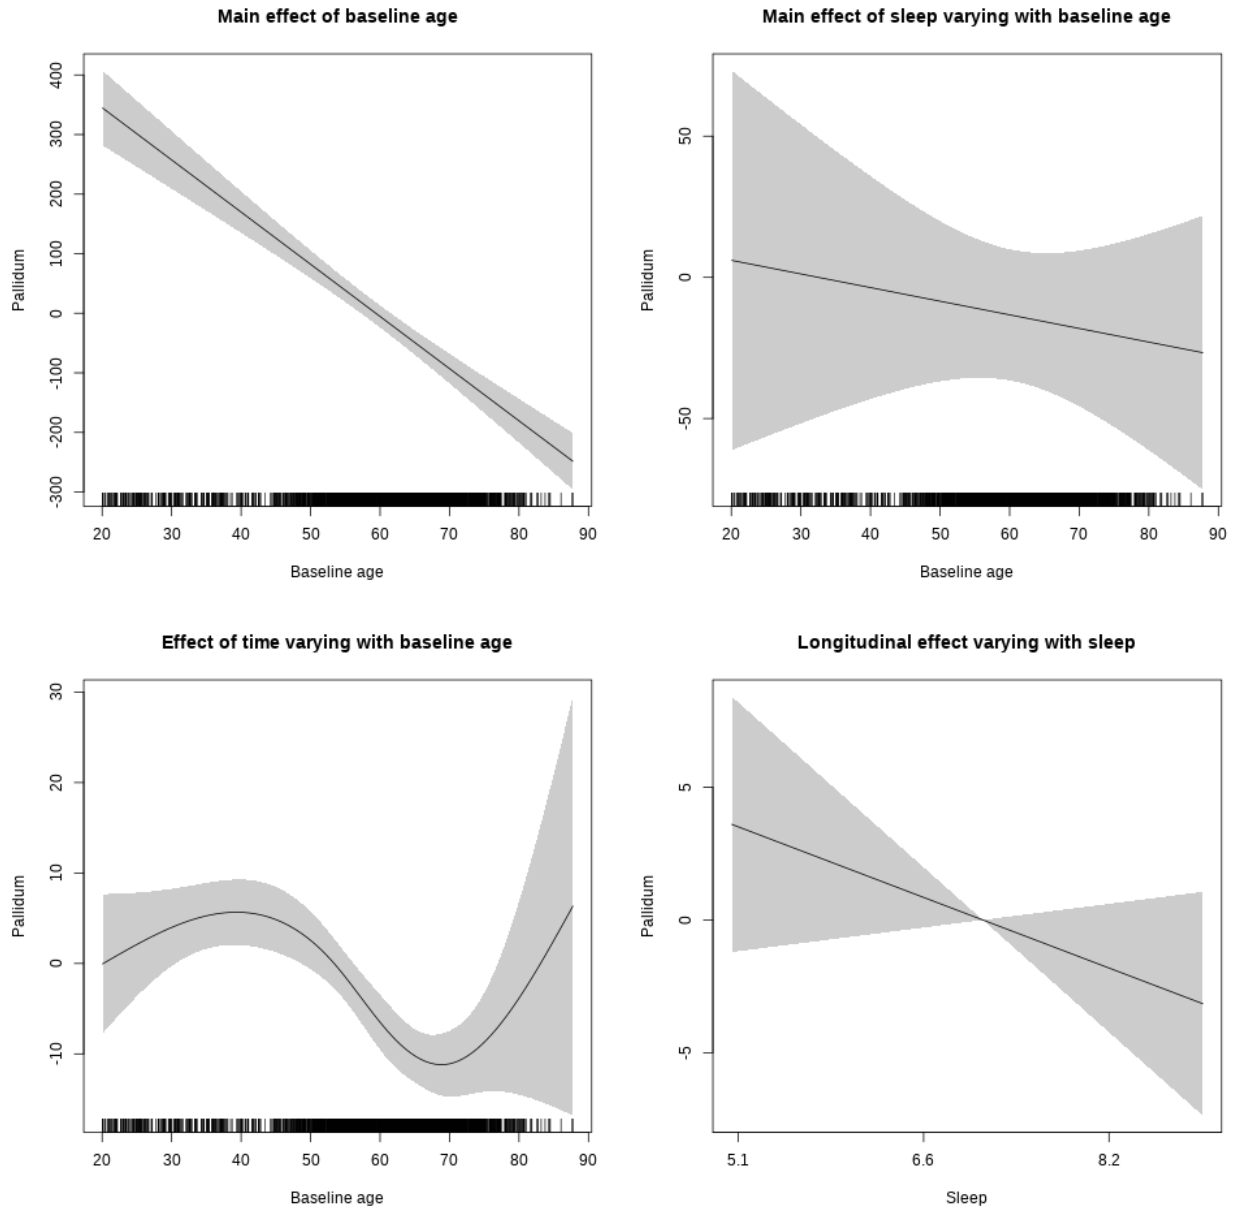

## Putamen

### Main analysis

**Full data** Below is the model output. The term `s(sleep_z):time` is probably what we care most about.

```
##
## Family: gaussian
## Link function: identity
##
## Formula:
## value ~ sex + site + icv + s(bl_age, k = 10, bs = "cr") + s(bl_age,
##   by = sleep_z, bs = "cr") + +s(bl_age, by = time, k = 5, bs = "cr") +
```

```

##      s(sleep_z, by = time, k = 5, bs = "cr", pc = 0)
## <environment: 0x5639112565a0>
##
## Parametric coefficients:
##              Estimate Std. Error t value Pr(>|t|)
## (Intercept)  10036.64     63.37 158.373 < 2e-16 ***
## sexmale      342.33      32.69  10.470 < 2e-16 ***
## siteousAvanto -807.60     77.86 -10.372 < 2e-16 ***
## siteousPrisma -931.38    165.29  -5.635 1.81e-08 ***
## siteousSkyra -147.00     75.83  -1.939 0.05257 .
## siteUB       -437.94    148.68  -2.946 0.00323 **
## siteUCAM     -633.92     79.38  -7.986 1.58e-15 ***
## siteUKB      -932.52     60.46 -15.424 < 2e-16 ***
## siteUmU      -378.20     91.94  -4.114 3.93e-05 ***
## icv          505.61     15.28  33.083 < 2e-16 ***
## ---
## Signif. codes:  0 '***' 0.001 '**' 0.01 '*' 0.05 '.' 0.1 ' ' 1
##
## Approximate significance of smooth terms:
##              edf Ref.df      F p-value
## s(bl_age)      2.737  2.737 342.208 <2e-16 ***
## s(bl_age):sleep_z 2.000  2.000   0.750   0.473
## s(bl_age):time  2.000  2.000 357.290 <2e-16 ***
## s(sleep_z):time  1.000  1.000   0.866   0.352
## ---
## Signif. codes:  0 '***' 0.001 '**' 0.01 '*' 0.05 '.' 0.1 ' ' 1
##
## R-sq.(adj) =  0.474
## lmer.REML = 1.2288e+05 Scale est. = 35312      n = 8138

```

Below are plots of a plot of  $s(\text{bl\_age})$ ,  $s(\text{bl\_age}):\text{sleep\_z}$ ,  $s(\text{bl\_age}):\text{time}$ , and  $s(\text{sleep\_z}):\text{time}$ . For  $s(\text{sleep\_z}):\text{time}$ , roughly, if we cannot fit a straight line through the confidence bands, there is evidence that the effect of time depends on sleep duration. It is correct that the confidence interval is zero at one point along the axis; this happens because we do not include the main effect.

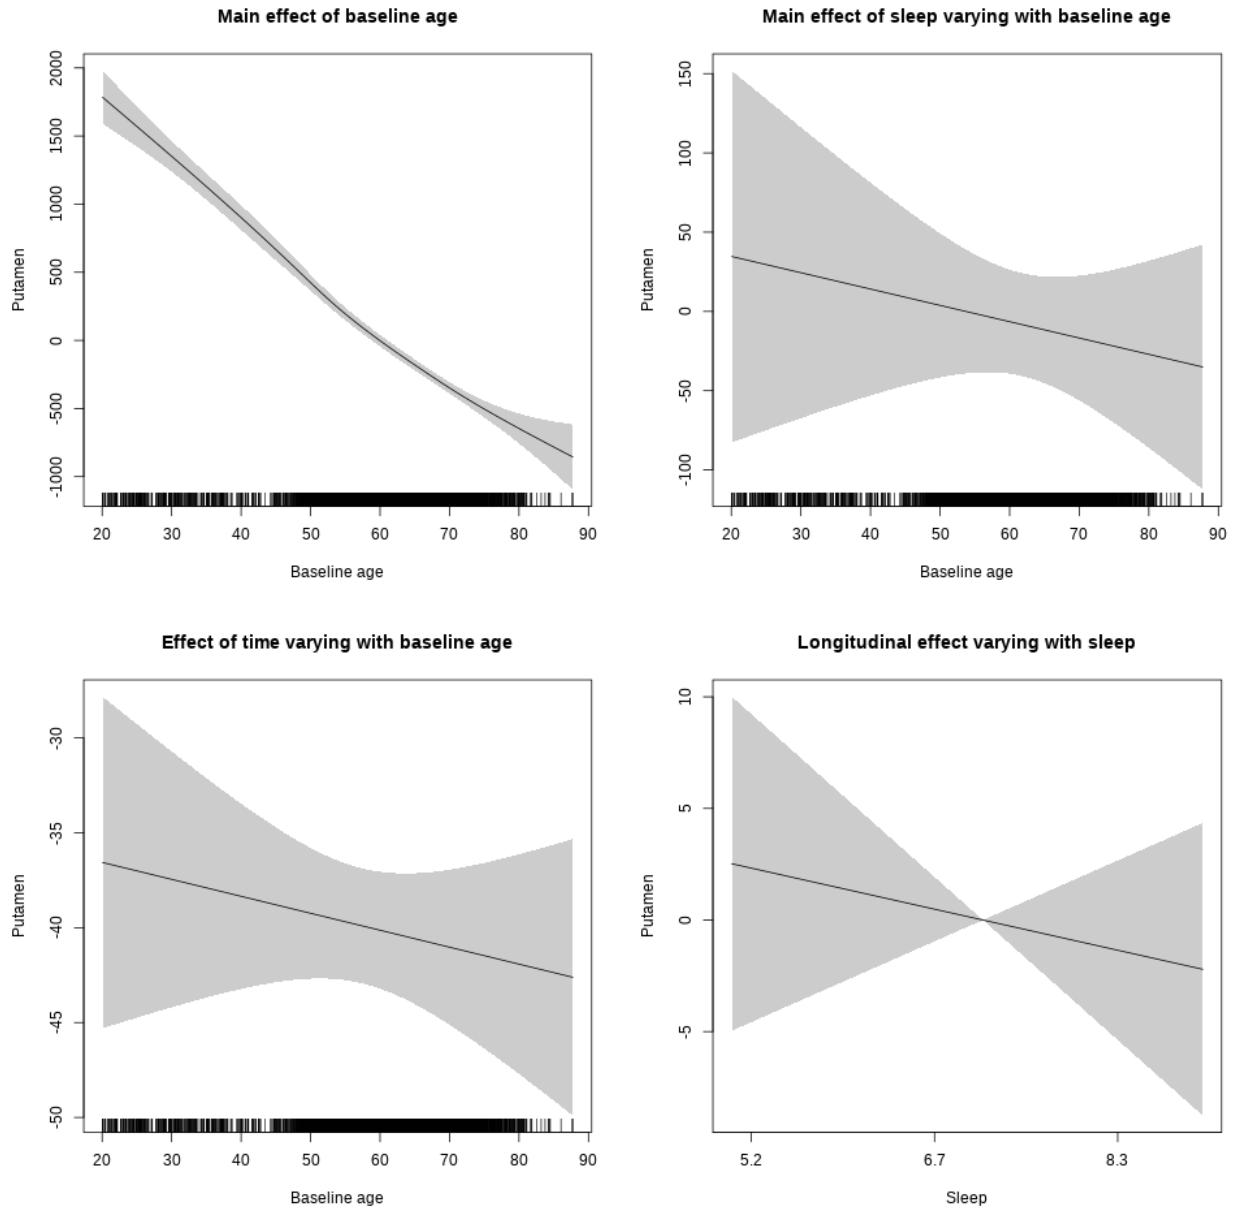

**Restricted to sleep  $\geq 5$  and  $\leq 9$  hours** Below is the row for `s(sleep_z):time` from the model output.

```
## s(sleep_z):time  1.000  1.000  0.454  0.501
```

Below are plots of a plot of `s(bl_age)`, `s(bl_age):sleep_z`, `s(bl_age):time`, and `s(sleep_z):time`. For `s(sleep_z):time`, roughly, if we cannot fit a straight line through the confidence bands, there is evidence that the effect of time depends on sleep duration. It is correct that the confidence interval is zero at one point along the axis; this happens because we do not include the main effect.



## Controlling for socioeconomic status

**Full data** Below is the model output. The term `s(sleep_z):time` is probably what we care most about.

```
##
## Family: gaussian
## Link function: identity
##
## Formula:
## value ~ sex + site + income_scaled + education_scaled + icv +
##       s(bl_age, k = 10, bs = "cr") + s(bl_age, by = sleep_z, bs = "cr") +
##       +s(bl_age, by = time, k = 5, bs = "cr") + s(sleep_z, by = time,
##       k = 5, bs = "cr", pc = 0)
```

```

## <environment: 0x563911591ea8>
##
## Parametric coefficients:
##           Estimate Std. Error t value Pr(>|t|)
## (Intercept)  10108.80    147.55  68.509 < 2e-16 ***
## sexmale      343.99     40.91   8.408 < 2e-16 ***
## siteousAvanto -1013.74    159.28  -6.365 2.15e-10 ***
## siteousPrisma -1146.25    274.55  -4.175 3.03e-05 ***
## siteousSkyra  -185.49    152.19  -1.219  0.2230
## siteUKB      -1118.78    139.34  -8.029 1.24e-15 ***
## income_scaled -20.12     51.02  -0.394  0.6933
## education_scaled 106.93     58.83   1.818  0.0692 .
## icv          533.52     19.73  27.038 < 2e-16 ***
## ---
## Signif. codes:  0 '***' 0.001 '**' 0.01 '*' 0.05 '.' 0.1 ' ' 1
##
## Approximate significance of smooth terms:
##           edf Ref.df      F p-value
## s(bl_age)      1.198  1.198 309.447 <2e-16 ***
## s(bl_age):sleep_z 2.000  2.000   1.101  0.332
## s(bl_age):time  2.000  2.000 185.898 <2e-16 ***
## s(sleep_z):time  1.000  1.000   0.573  0.449
## ---
## Signif. codes:  0 '***' 0.001 '**' 0.01 '*' 0.05 '.' 0.1 ' ' 1
##
## R-sq.(adj) =  0.485
## lmer.REML = 70015 Scale est. = 34065      n = 4642

```

Below are plots of a plot of  $s(\text{bl\_age})$ ,  $s(\text{bl\_age}):\text{sleep\_z}$ ,  $s(\text{bl\_age}):\text{time}$ , and  $s(\text{sleep\_z}):\text{time}$ . For  $s(\text{sleep\_z}):\text{time}$ , roughly, if we cannot fit a straight line through the confidence bands, there is evidence that the effect of time depends on sleep duration. It is correct that the confidence interval is zero at one point along the axis; this happens because we do not include the main effect.

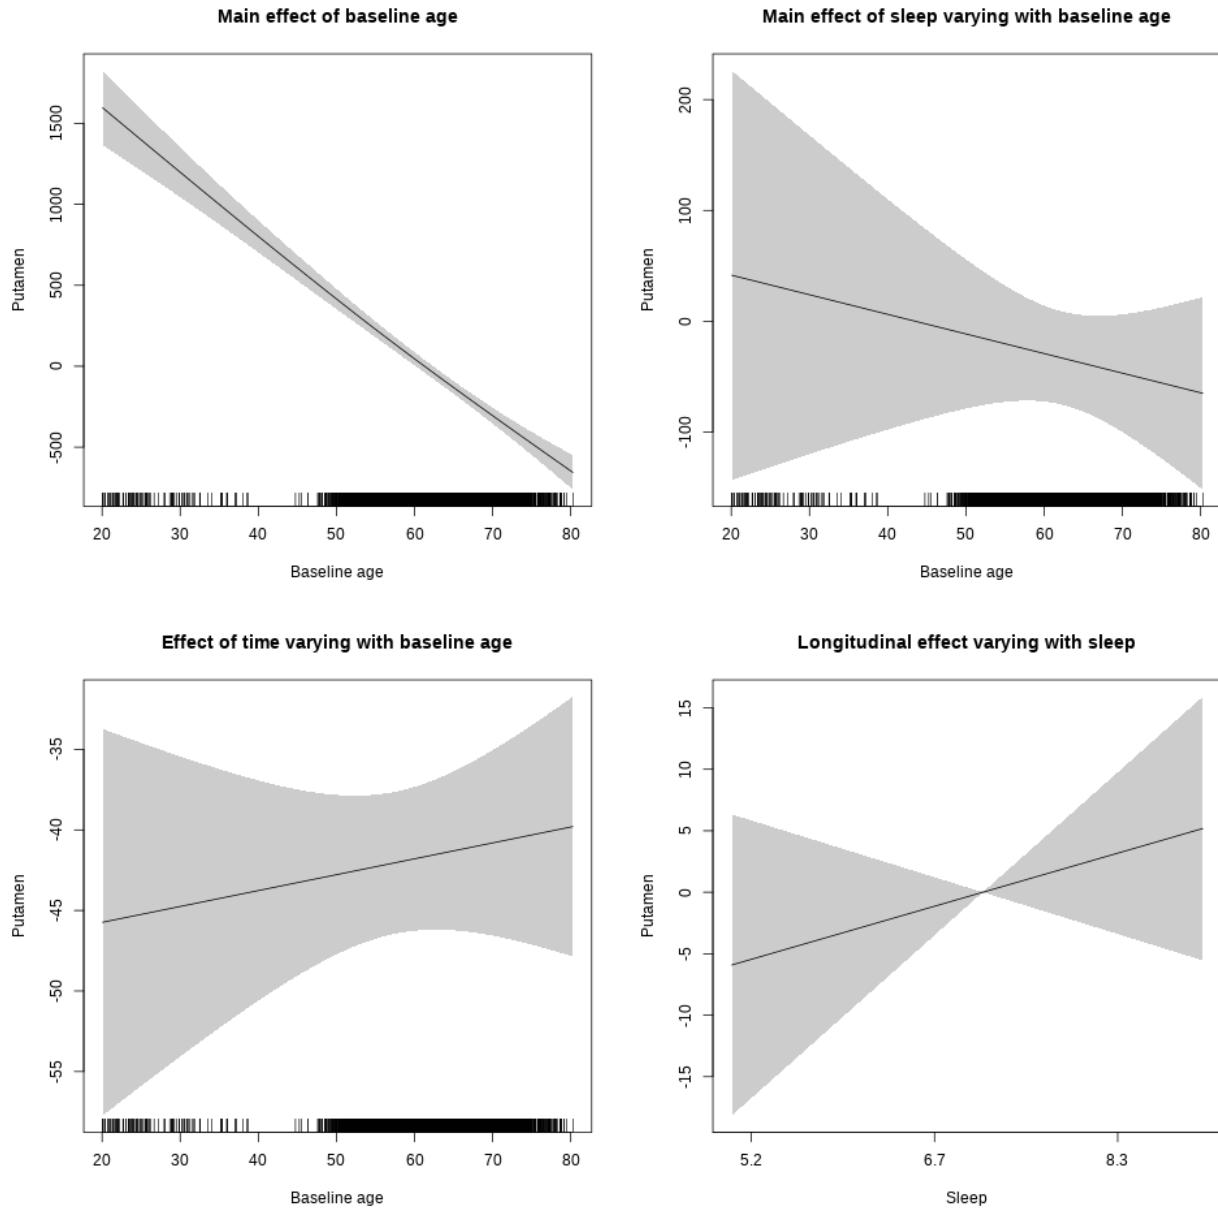

**Restricted to sleep  $\geq 5$  and  $\leq 9$  hours** Below is the row for `s(sleep_z):time` from the model output.

```
## s(sleep_z):time 1.000 1.000 0.934 0.334
```

Below are plots of a plot of `s(bl_age)`, `s(bl_age):sleep_z`, `s(bl_age):time`, and `s(sleep_z):time`. For `s(sleep_z):time`, roughly, if we cannot fit a straight line through the confidence bands, there is evidence that the effect of time depends on sleep duration. It is correct that the confidence interval is zero at one point along the axis; this happens because we do not include the main effect.





## Controlling for BMI

**Full data** Below is the model output. The term `s(sleep_z):time` is probably what we care most about.

```
##
## Family: gaussian
## Link function: identity
##
## Formula:
## value ~ sex + site + bmi + icv + s(bl_age, k = 10, bs = "cr") +
##   s(bl_age, by = sleep_z, bs = "cr") + +s(bl_age, by = time,
##     k = 5, bs = "cr") + s(sleep_z, by = time, k = 5, bs = "cr",
##     pc = 0)
```

```

## <environment: 0x563916ea8cc8>
##
## Parametric coefficients:
##           Estimate Std. Error t value Pr(>|t|)
## (Intercept)  8837.967    130.471  67.739 < 2e-16 ***
## sexmale      343.302     38.212   8.984 < 2e-16 ***
## siteousPrisma -6.474    148.880  -0.043  0.9653
## siteousSkyra  763.741     47.703  16.010 < 2e-16 ***
## siteUCAM     278.635     95.937   2.904  0.0037 **
## siteUKB     -51.824     87.875  -0.590  0.5554
## siteUmU     551.764    112.060   4.924 8.74e-07 ***
## bmi         11.475      3.996   2.872  0.0041 **
## icv         520.040     18.361  28.323 < 2e-16 ***
## ---
## Signif. codes:  0 '***' 0.001 '**' 0.01 '*' 0.05 '.' 0.1 ' ' 1
##
## Approximate significance of smooth terms:
##           edf Ref.df      F p-value
## s(bl_age)      2.069  2.069 288.833 <2e-16 ***
## s(bl_age):sleep_z 2.000  2.000  0.952  0.386
## s(bl_age):time  2.711  2.711 201.808 <2e-16 ***
## s(sleep_z):time  1.000  1.000  0.013  0.911
## ---
## Signif. codes:  0 '***' 0.001 '**' 0.01 '*' 0.05 '.' 0.1 ' ' 1
##
## R-sq.(adj) =  0.498
## lmer.REML = 81532 Scale est. = 33294      n = 5404

```

Below are plots of a plot of `s(bl_age)`, `s(bl_age):sleep_z`, `s(bl_age):time`, and `s(sleep_z):time`. For `s(sleep_z):time`, roughly, if we cannot fit a straight line through the confidence bands, there is evidence that the effect of time depends on sleep duration. It is correct that the confidence interval is zero at one point along the axis; this happens because we do not include the main effect.

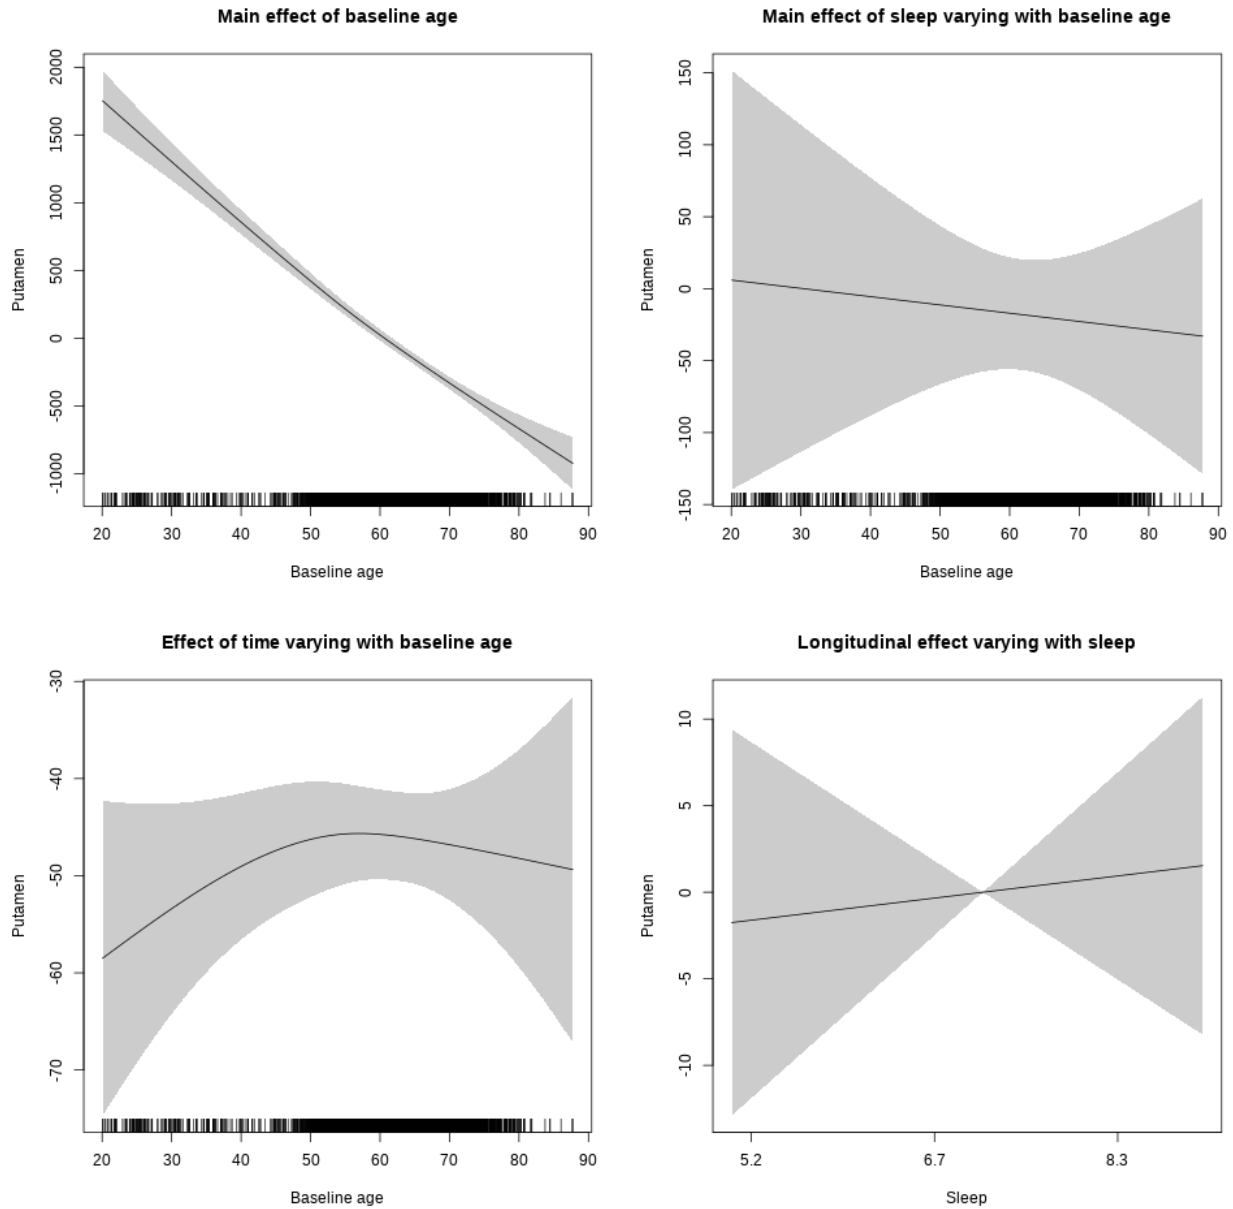

**Restricted to sleep  $\geq 5$  and  $\leq 9$  hours** Below is the row for `s(sleep_z):time` from the model output.

```
## s(sleep_z):time  1.000  1.000  0.099  0.753
```

Below are plots of a plot of `s(bl_age)`, `s(bl_age):sleep_z`, `s(bl_age):time`, and `s(sleep_z):time`. For `s(sleep_z):time`, roughly, if we cannot fit a straight line through the confidence bands, there is evidence that the effect of time depends on sleep duration. It is correct that the confidence interval is zero at one point along the axis; this happens because we do not include the main effect.

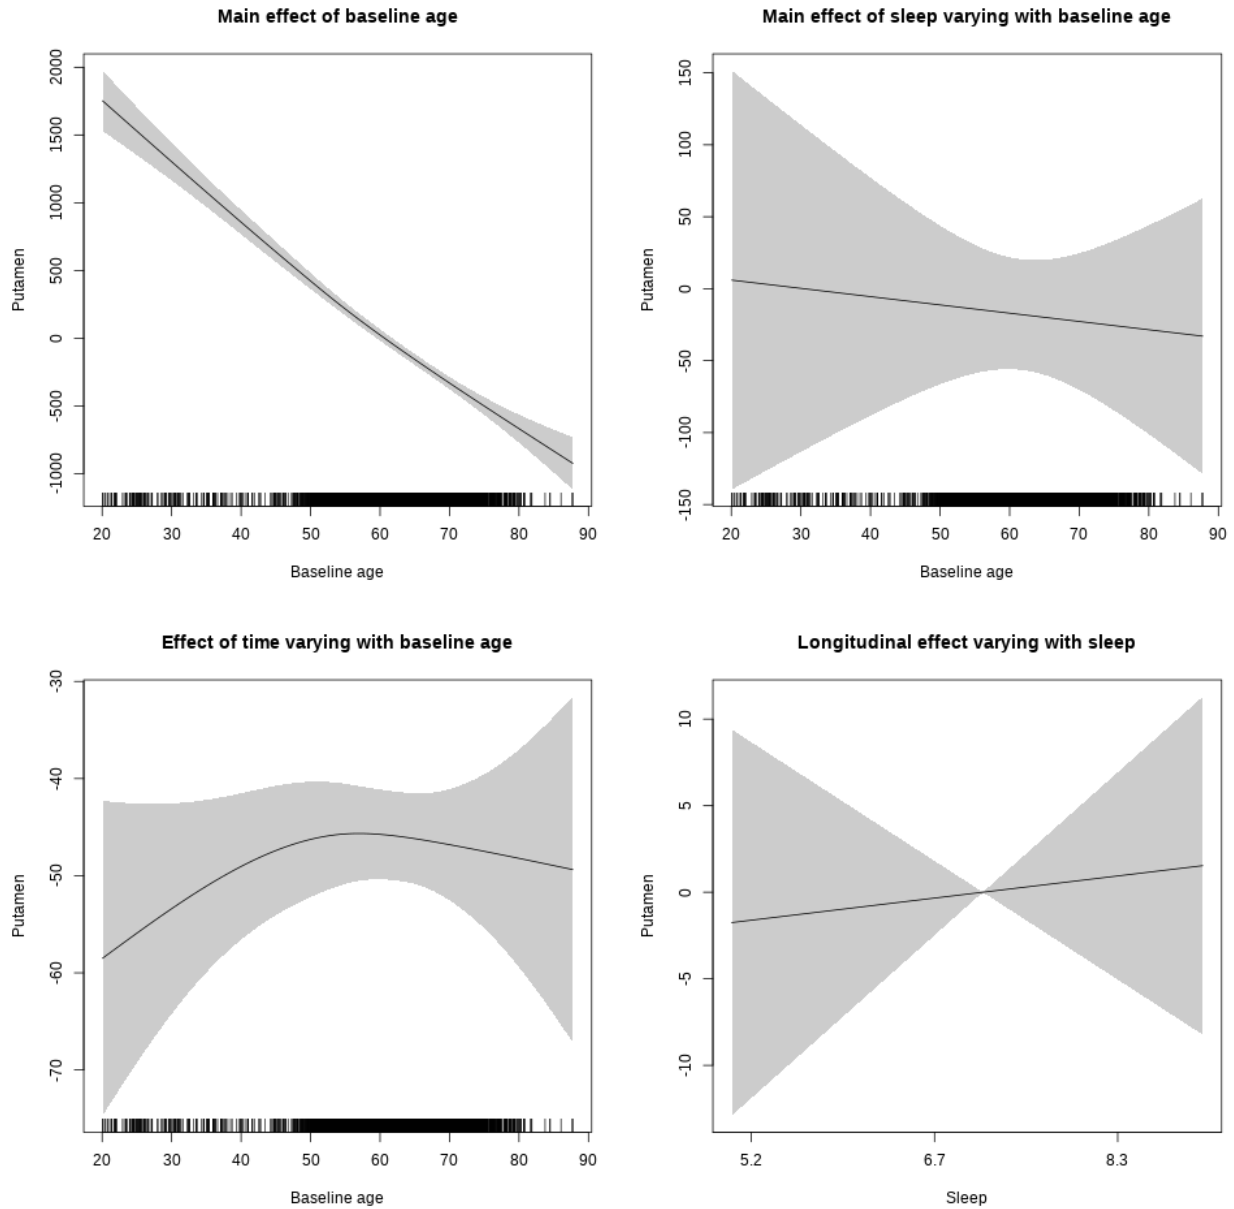

## Controlling for depression

**Full data** Below is the model output. The term `s(sleep_z):time` is probably what we care most about.

```
##
## Family: gaussian
## Link function: identity
##
## Formula:
## value ~ sex + site + depression + icv + s(bl_age, k = 10, bs = "cr") +
##   s(bl_age, by = sleep_z, bs = "cr") + +s(bl_age, by = time,
##     k = 5, bs = "cr") + s(sleep_z, by = time, k = 5, bs = "cr",
##     pc = 0)
```

```

## <environment: 0x563910fa49d0>
##
## Parametric coefficients:
##           Estimate Std. Error t value Pr(>|t|)
## (Intercept)   9922.28     71.47 138.823 < 2e-16 ***
## sexmale       352.63     37.43   9.421 < 2e-16 ***
## siteousAvanto -668.08    143.32  -4.661 3.21e-06 ***
## siteousPrisma -529.59    222.43  -2.381 0.01730 *
## siteousSkyra  159.28    128.64   1.238 0.21570
## siteUCAM      -546.69     85.46  -6.397 1.71e-10 ***
## siteUKB       -873.40     65.63 -13.307 < 2e-16 ***
## siteUmU       -281.37    105.79  -2.660 0.00784 **
## depression    12.86     132.58   0.097 0.92274
## icv           496.79     17.65  28.148 < 2e-16 ***
## ---
## Signif. codes:  0 '***' 0.001 '**' 0.01 '*' 0.05 '.' 0.1 ' ' 1
##
## Approximate significance of smooth terms:
##           edf Ref.df      F p-value
## s(bl_age)      1.918  1.918 291.900 <2e-16 ***
## s(bl_age):sleep_z 2.000  2.000   0.599   0.549
## s(bl_age):time  2.753  2.753 185.716 <2e-16 ***
## s(sleep_z):time 1.000  1.000   1.494   0.222
## ---
## Signif. codes:  0 '***' 0.001 '**' 0.01 '*' 0.05 '.' 0.1 ' ' 1
##
## R-sq.(adj) =  0.477
## lmer.REML = 85664 Scale est. = 33794      n = 5671

```

Below are plots of a plot of `s(bl_age)`, `s(bl_age):sleep_z`, `s(bl_age):time`, and `s(sleep_z):time`. For `s(sleep_z):time`, roughly, if we cannot fit a straight line through the confidence bands, there is evidence that the effect of time depends on sleep duration. It is correct that the confidence interval is zero at one point along the axis; this happens because we do not include the main effect.

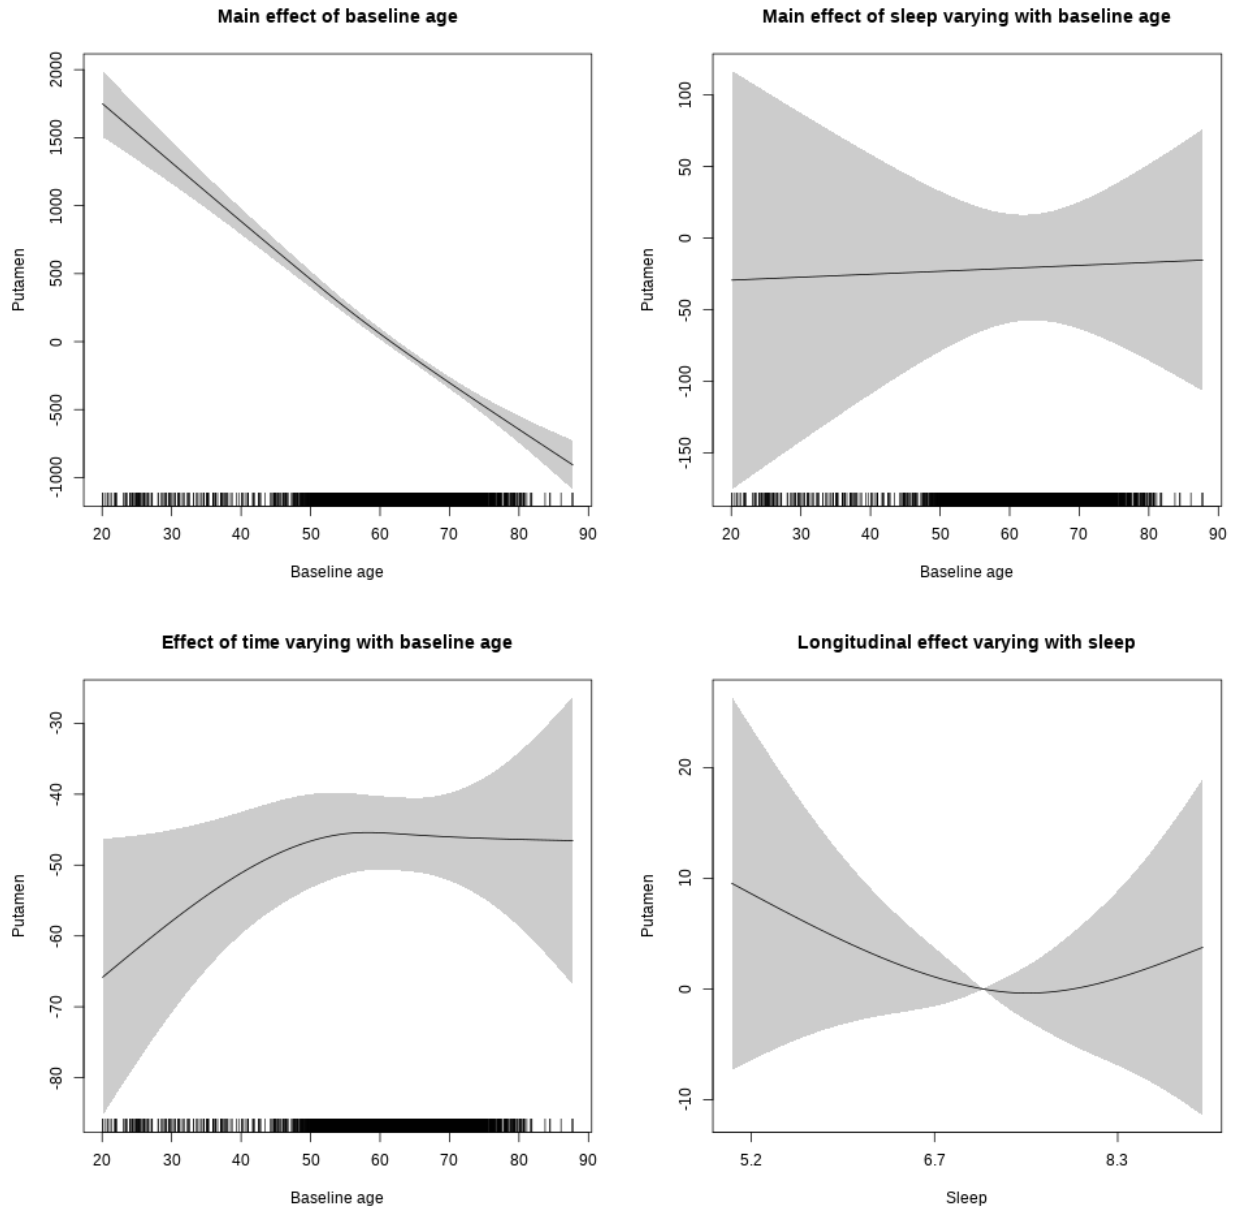

**Restricted to sleep  $\geq 5$  and  $\leq 9$  hours** Below is the row for `s(sleep_z):time` from the model output.

```
## s(sleep_z):time  1.590  1.590  0.931  0.505
```

Below are plots of a plot of `s(bl_age)`, `s(bl_age):sleep_z`, `s(bl_age):time`, and `s(sleep_z):time`. For `s(sleep_z):time`, roughly, if we cannot fit a straight line through the confidence bands, there is evidence that the effect of time depends on sleep duration. It is correct that the confidence interval is zero at one point along the axis; this happens because we do not include the main effect.

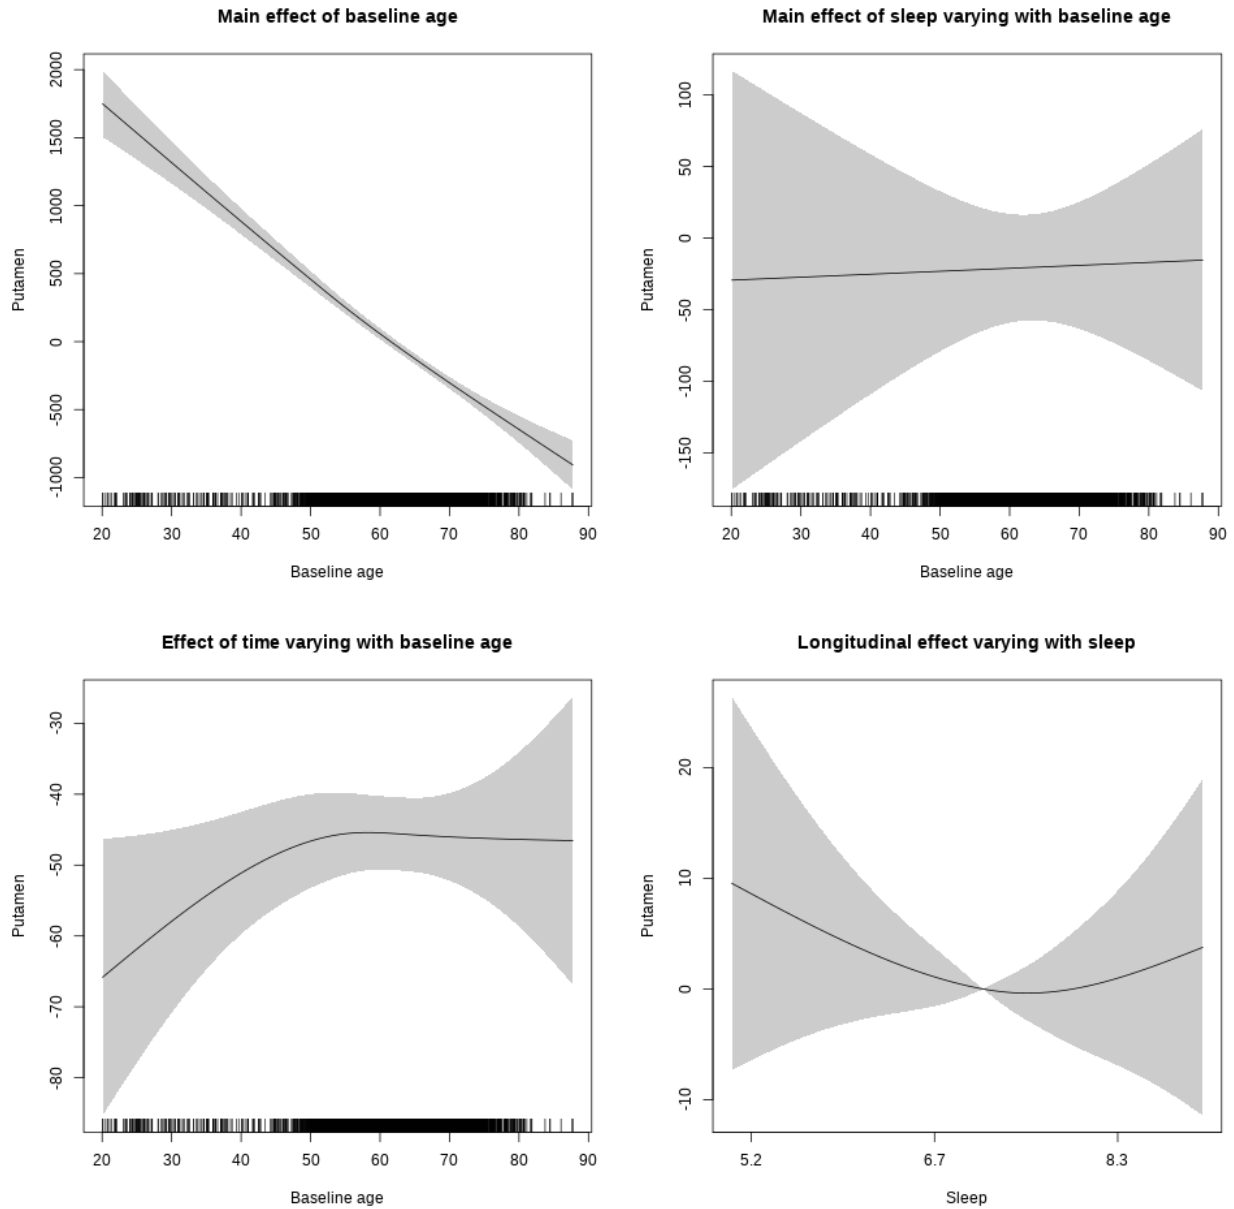

### Controlling for sleep quality

**Full data** Below is the model output. The term `s(sleep_z):time` is probably what we care most about.

```
##
## Family: gaussian
## Link function: identity
##
## Formula:
## value ~ X + s(bl_age, k = 10, bs = "cr") + s(bl_age, by = sleep_z,
##       bs = "cr") + s(bl_age, by = time, k = 5, bs = "cr") + s(sleep_z,
##       by = time, k = 5, bs = "cr", pc = 0)
## <environment: 0x563914d995c8>
```

```

##
## Parametric coefficients:
##               Estimate Std. Error t value Pr(>|t|)
## (Intercept)      8916.543    119.965  74.326 < 2e-16 ***
## Xsexmale          878.383     45.062  19.493 < 2e-16 ***
## XsiteousAvanto    404.481    114.284   3.539 0.000406 ***
## XsiteousPrisma    496.952    183.650   2.706 0.006838 **
## XsiteousSkyra     877.905    114.532   7.665 2.2e-14 ***
## XsiteUB           286.924    182.756   1.570 0.116493
## XsiteUCAM         381.125    116.003   3.285 0.001026 **
## XsiteUKB          604.876    364.256   1.661 0.096871 .
## XsiteUmU          347.787    129.881   2.678 0.007441 **
## Xukb_dummy:sleep_accel -14.825     28.289  -0.524 0.600268
## Xukb_dummy:chronotype  -8.904     37.725  -0.236 0.813433
## Xukb_dummy:dozing      81.039     77.851   1.041 0.297960
## Xukb_dummy:sleeplessness -119.550    48.367  -2.472 0.013484 *
## Xukb_dummy:snoring     -77.248     68.762  -1.123 0.261324
## Xukb_dummy:gettingup   -30.098     52.434  -0.574 0.565988
## Xnotukb_dummy:PSQI_Global  2.456     14.906   0.165 0.869147
## ---
## Signif. codes:  0 '***' 0.001 '**' 0.01 '*' 0.05 '.' 0.1 ' ' 1
##
## Approximate significance of smooth terms:
##               edf Ref.df      F p-value
## s(bl_age)      1.178  1.178 431.280 <2e-16 ***
## s(bl_age):sleep_z 2.000  2.000   1.790  0.1671
## s(bl_age):time  2.000  2.000 258.458 <2e-16 ***
## s(sleep_z):time  1.000  1.000   6.278  0.0123 *
## ---
## Signif. codes:  0 '***' 0.001 '**' 0.01 '*' 0.05 '.' 0.1 ' ' 1
##
## R-sq.(adj) =  0.392
## lmer.REML = 64712 Scale est. = 34945      n = 4278

```

Below are plots of a plot of `s(bl_age)`, `s(bl_age):sleep_z`, `s(bl_age):time`, and `s(sleep_z):time`. For `s(sleep_z):time`, roughly, if we cannot fit a straight line through the confidence bands, there is evidence that the effect of time depends on sleep duration. It is correct that that confidence interval is zero at one point along the axis; this happens because we do not include the main effect.



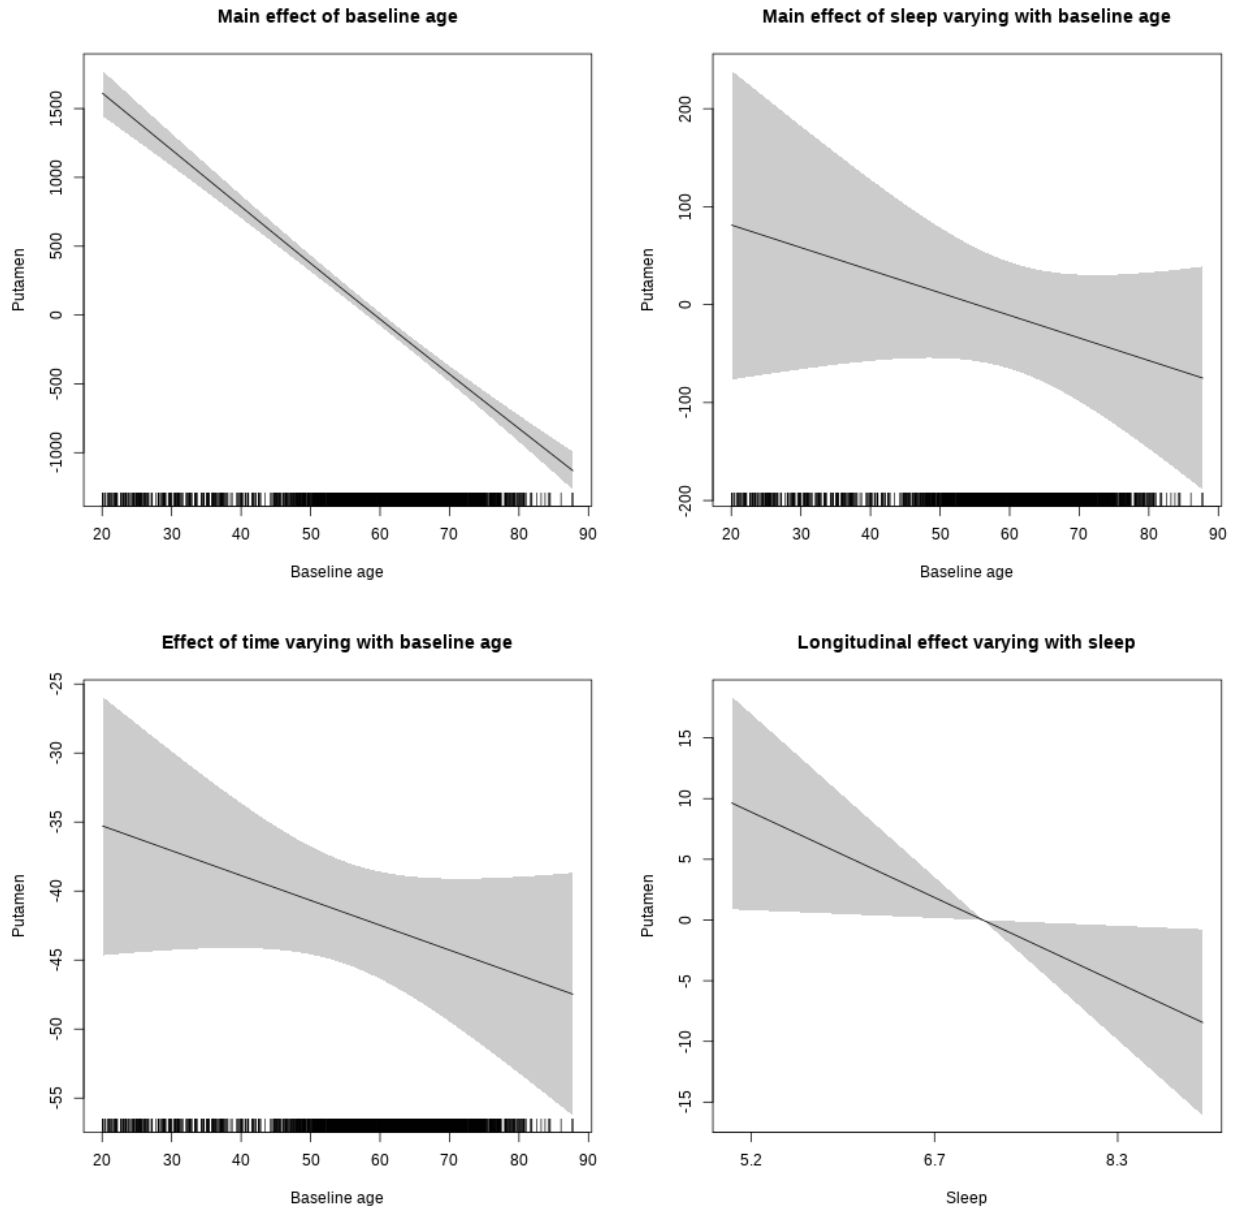

**Restricted to sleep  $\geq 5$  and  $\leq 9$  hours** Below is the row for `s(sleep_z):time` from the model output.

```
## s(sleep_z):time 1.000 1.000 4.843 0.0278 *
```

Below are plots of a plot of `s(bl_age)`, `s(bl_age):sleep_z`, `s(bl_age):time`, and `s(sleep_z):time`. For `s(sleep_z):time`, roughly, if we cannot fit a straight line through the confidence bands, there is evidence that the effect of time depends on sleep duration. It is correct that the confidence interval is zero at one point along the axis; this happens because we do not include the main effect.

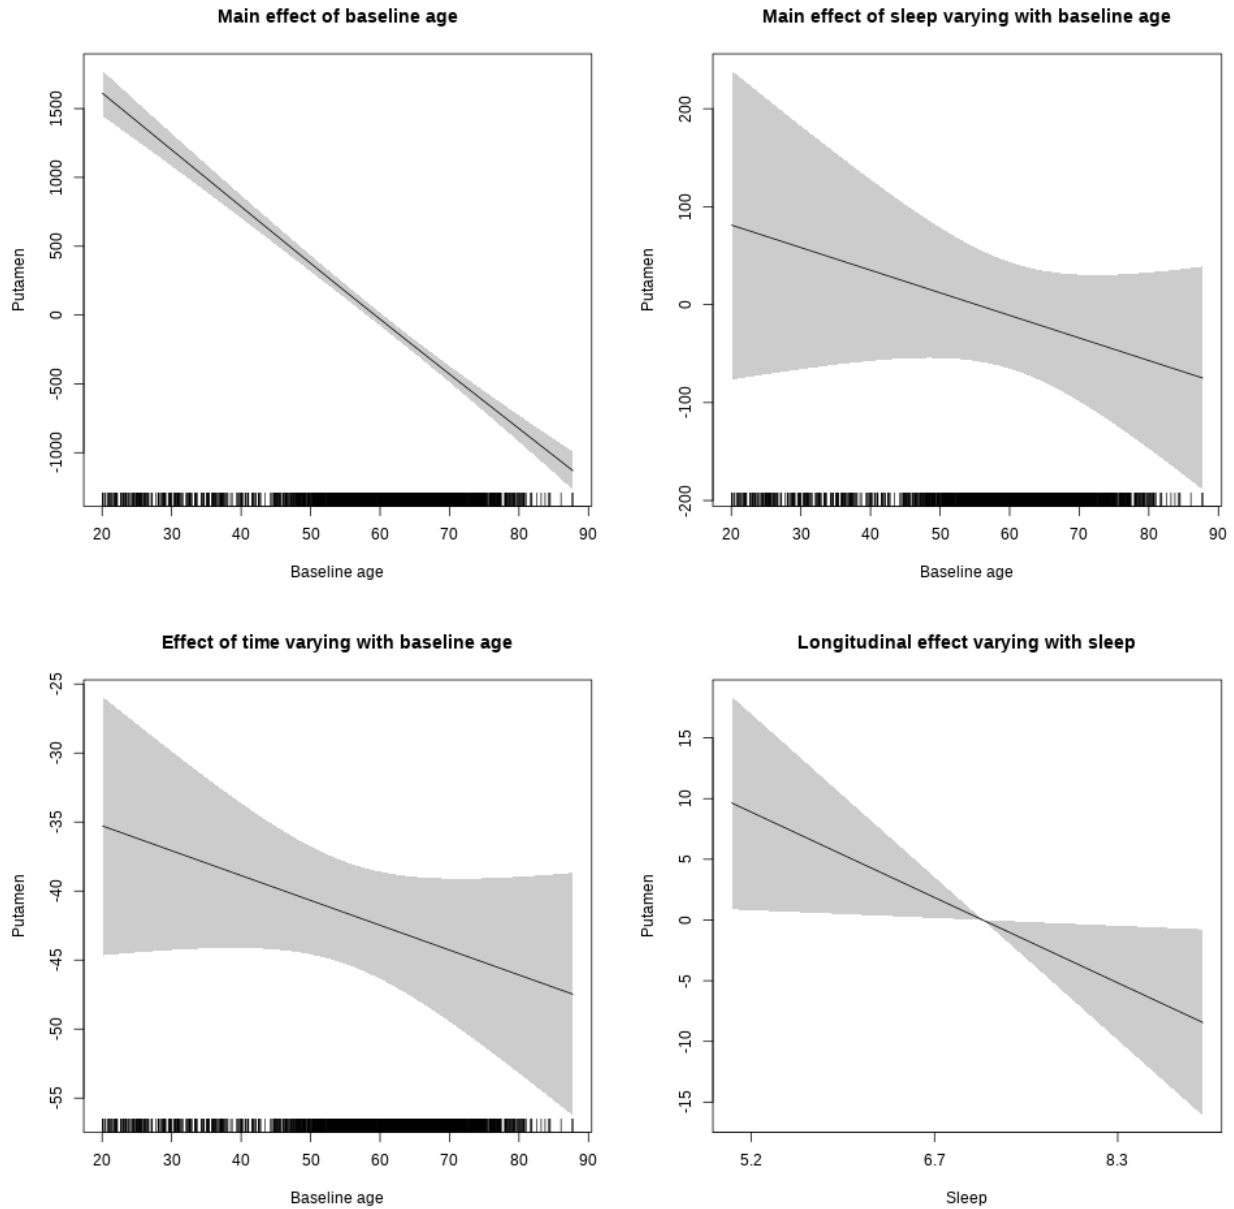

## Thalamus

### Main analysis

**Full data** Below is the model output. The term `s(sleep_z):time` is probably what we care most about.

```
##
## Family: gaussian
## Link function: identity
##
## Formula:
## value ~ sex + site + icv + s(bl_age, k = 10, bs = "cr") + s(bl_age,
##   by = sleep_z, bs = "cr") + +s(bl_age, by = time, k = 5, bs = "cr") +
```

```

##      s(sleep_z, by = time, k = 5, bs = "cr", pc = 0)
## <environment: 0x563911250648>
##
## Parametric coefficients:
##           Estimate Std. Error t value Pr(>|t|)
## (Intercept)  15114.94      71.51 211.376 < 2e-16 ***
## sexmale      191.81       36.80   5.212 1.92e-07 ***
## siteousAvanto -1484.08     87.75 -16.913 < 2e-16 ***
## siteousPrisma -1016.87    227.67  -4.466 8.06e-06 ***
## siteousSkyra  -1321.26     85.36 -15.479 < 2e-16 ***
## siteUB        -479.61    165.60  -2.896 0.00379 **
## siteUCAM      -600.07     89.81  -6.682 2.52e-11 ***
## siteUKB       -1343.41    68.28 -19.675 < 2e-16 ***
## siteUmU       -1481.90   102.79 -14.417 < 2e-16 ***
## icv           875.66     17.65  49.611 < 2e-16 ***
## ---
## Signif. codes:  0 '***' 0.001 '**' 0.01 '*' 0.05 '.' 0.1 ' ' 1
##
## Approximate significance of smooth terms:
##           edf Ref.df      F p-value
## s(bl_age)      4.690  4.690 390.659 < 2e-16 ***
## s(bl_age):sleep_z 2.000  2.000   4.306 0.013511 *
## s(bl_age):time   4.152  4.152 345.105 < 2e-16 ***
## s(sleep_z):time  1.000  1.000  12.385 0.000435 ***
## ---
## Signif. codes:  0 '***' 0.001 '**' 0.01 '*' 0.05 '.' 0.1 ' ' 1
##
## R-sq.(adj) =  0.618
## lmer.REML = 1.2711e+05 Scale est. = 74884      n = 8150

```

Below are plots of a plot of  $s(\text{bl\_age})$ ,  $s(\text{bl\_age}):\text{sleep\_z}$ ,  $s(\text{bl\_age}):\text{time}$ , and  $s(\text{sleep\_z}):\text{time}$ . For  $s(\text{sleep\_z}):\text{time}$ , roughly, if we cannot fit a straight line through the confidence bands, there is evidence that the effect of time depends on sleep duration. It is correct that the confidence interval is zero at one point along the axis; this happens because we do not include the main effect.

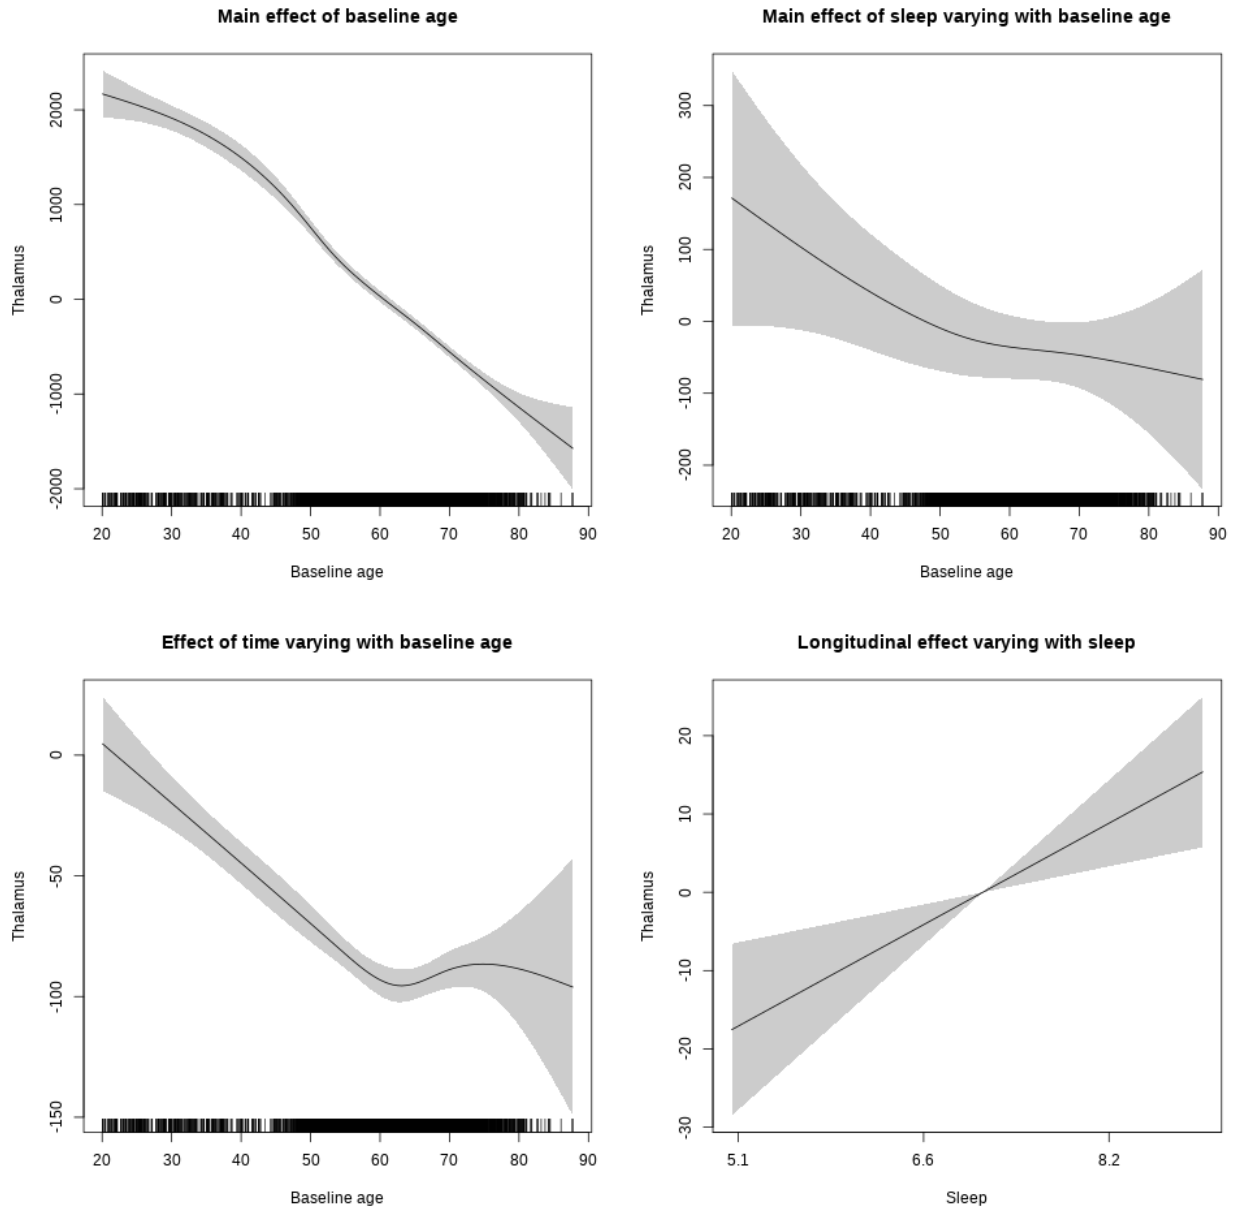

**Restricted to sleep  $\geq 5$  and  $\leq 9$  hours** Below is the row for `s(sleep_z):time` from the model output.

```
## s(sleep_z):time 1.000 1.000 10.227 0.00139 **
```

Below are plots of a plot of `s(bl_age)`, `s(bl_age):sleep_z`, `s(bl_age):time`, and `s(sleep_z):time`. For `s(sleep_z):time`, roughly, if we cannot fit a straight line through the confidence bands, there is evidence that the effect of time depends on sleep duration. It is correct that the confidence interval is zero at one point along the axis; this happens because we do not include the main effect.

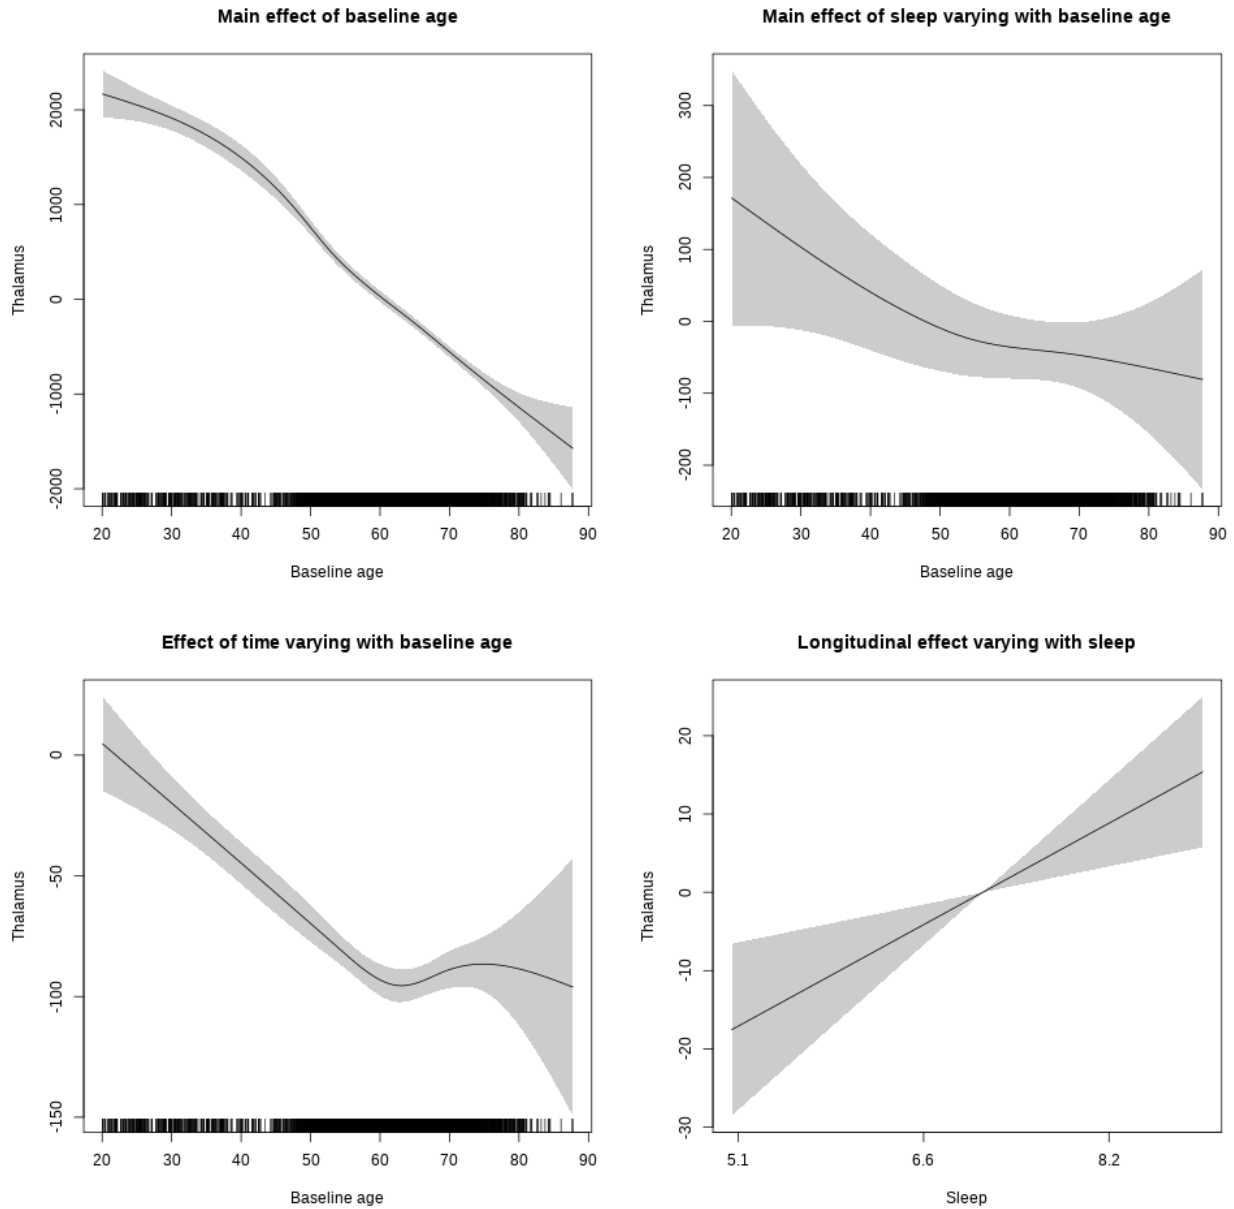

### Controlling for socioeconomic status

**Full data** Below is the model output. The term `s(sleep_z):time` is probably what we care most about.

```
##
## Family: gaussian
## Link function: identity
##
## Formula:
## value ~ sex + site + income_scaled + education_scaled + icv +
##   s(bl_age, k = 10, bs = "cr") + s(bl_age, by = sleep_z, bs = "cr") +
##   +s(bl_age, by = time, k = 5, bs = "cr") + s(sleep_z, by = time,
##   k = 5, bs = "cr", pc = 0)
```

```

## <environment: 0x563911590e40>
##
## Parametric coefficients:
##           Estimate Std. Error t value Pr(>|t|)
## (Intercept)  15164.94    165.44  91.665 < 2e-16 ***
## sexmale      154.68      46.21   3.348 0.000822 ***
## siteousAvanto -1945.43    182.91 -10.636 < 2e-16 ***
## siteousPrisma -767.44    386.82  -1.984 0.047320 *
## siteousSkyra -1499.75    170.54  -8.794 < 2e-16 ***
## siteUKB      -1576.56    155.79 -10.120 < 2e-16 ***
## income_scaled  36.64     56.70   0.646 0.518194
## education_scaled 135.05    65.86   2.051 0.040355 *
## icv          955.59     22.96  41.622 < 2e-16 ***
## ---
## Signif. codes:  0 '***' 0.001 '**' 0.01 '*' 0.05 '.' 0.1 ' ' 1
##
## Approximate significance of smooth terms:
##           edf Ref.df      F p-value
## s(bl_age)      1.000  1.000 691.854 <2e-16 ***
## s(bl_age):sleep_z 2.000  2.000   0.546  0.5794
## s(bl_age):time  3.977  3.977 114.185 <2e-16 ***
## s(sleep_z):time  1.000  1.000   3.280  0.0702 .
## ---
## Signif. codes:  0 '***' 0.001 '**' 0.01 '*' 0.05 '.' 0.1 ' ' 1
##
## R-sq.(adj) =  0.61
## lmer.REML = 72657 Scale est. = 79667      n = 4650

```

Below are plots of a plot of  $s(\text{bl\_age})$ ,  $s(\text{bl\_age}):\text{sleep\_z}$ ,  $s(\text{bl\_age}):\text{time}$ , and  $s(\text{sleep\_z}):\text{time}$ . For  $s(\text{sleep\_z}):\text{time}$ , roughly, if we cannot fit a straight line through the confidence bands, there is evidence that the effect of time depends on sleep duration. It is correct that the confidence interval is zero at one point along the axis; this happens because we do not include the main effect.

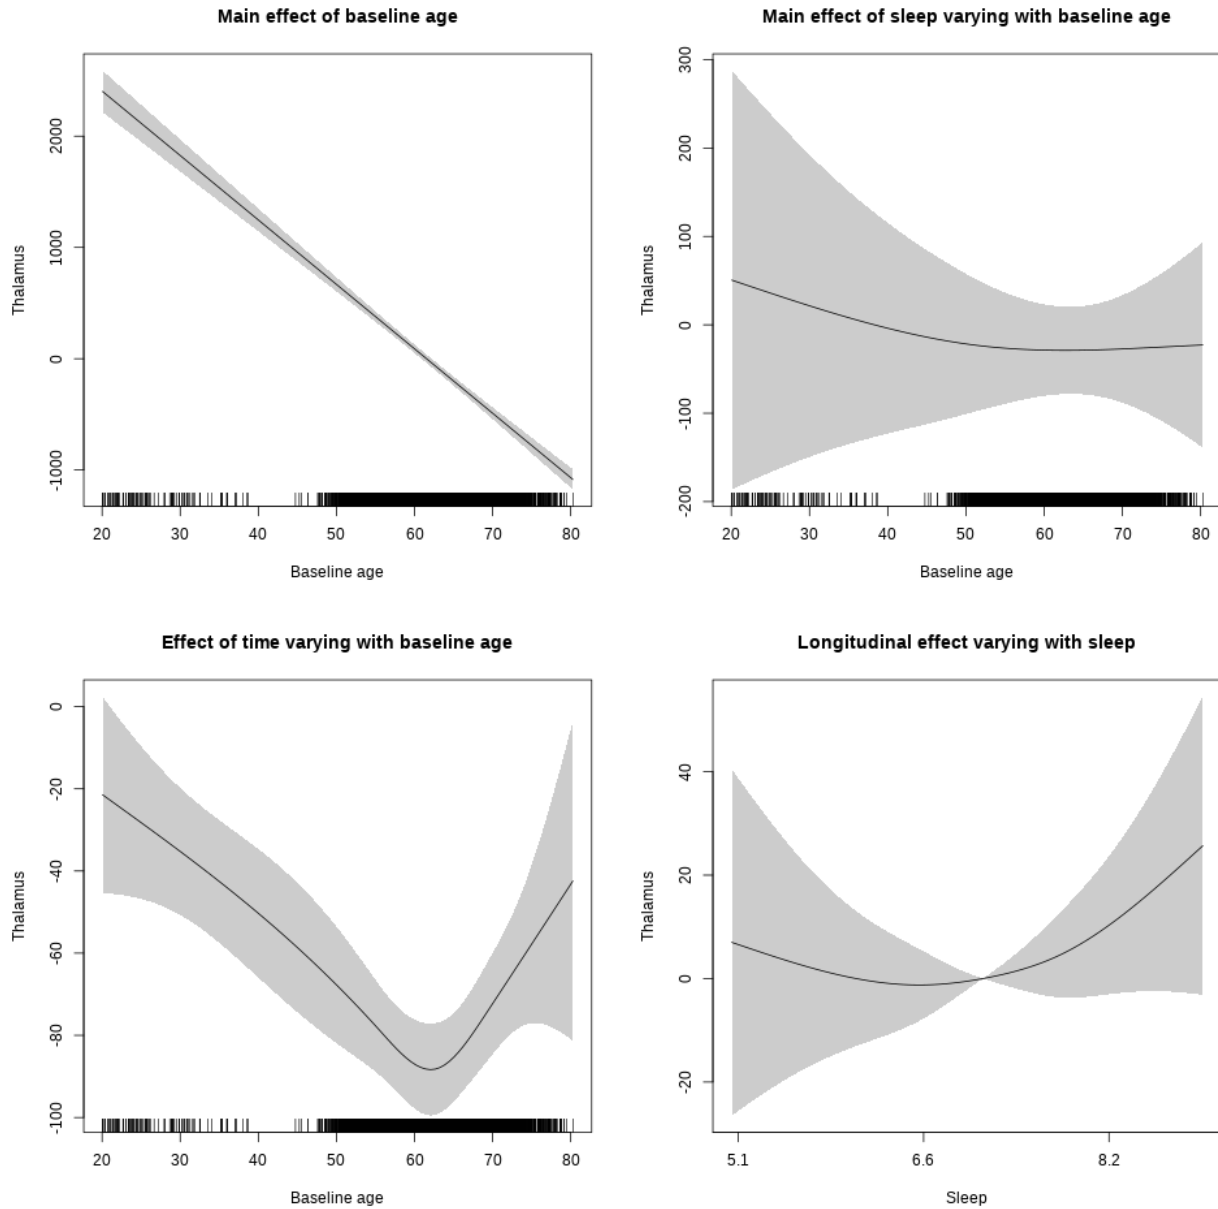

**Restricted to sleep  $\geq 5$  and  $\leq 9$  hours** Below is the row for `s(sleep_z):time` from the model output.

```
## s(sleep_z):time  1.842  1.842  1.030  0.256
```

Below are plots of a plot of `s(bl_age)`, `s(bl_age):sleep_z`, `s(bl_age):time`, and `s(sleep_z):time`. For `s(sleep_z):time`, roughly, if we cannot fit a straight line through the confidence bands, there is evidence that the effect of time depends on sleep duration. It is correct that the confidence interval is zero at one point along the axis; this happens because we do not include the main effect.



## Controlling for BMI

**Full data** Below is the model output. The term `s(sleep_z):time` is probably what we care most about.

```
##
## Family: gaussian
## Link function: identity
##
## Formula:
## value ~ sex + site + bmi + icv + s(bl_age, k = 10, bs = "cr") +
##   s(bl_age, by = sleep_z, bs = "cr") + s(bl_age, by = time,
##   k = 5, bs = "cr") + s(sleep_z, by = time, k = 5, bs = "cr",
##   pc = 0)
```



```

## <environment: 0x563916b2ebb8>
##
## Parametric coefficients:
##           Estimate Std. Error t value Pr(>|t|)
## (Intercept) 13546.691   146.724  92.328 < 2e-16 ***
## sexmale      153.588    43.090   3.564 0.000368 ***
## siteousPrisma 475.689   219.412   2.168 0.030201 *
## siteousSkyra  266.377    69.724   3.820 0.000135 ***
## siteUCAM     1095.049   112.932   9.696 < 2e-16 ***
## siteUKB      236.783    100.339   2.360 0.018319 *
## siteUmU      193.892    128.602   1.508 0.131692
## bmi          -1.855     4.473   -0.415 0.678411
## icv          939.193    21.225  44.250 < 2e-16 ***
## ---
## Signif. codes:  0 '***' 0.001 '**' 0.01 '*' 0.05 '.' 0.1 ' ' 1
##
## Approximate significance of smooth terms:
##           edf Ref.df      F p-value
## s(bl_age)      1.000  1.000 1192.516 < 2e-16 ***
## s(bl_age):sleep_z 2.000  2.000   1.364 0.25576
## s(bl_age):time  4.113  4.113  143.055 < 2e-16 ***
## s(sleep_z):time  1.000  1.000   8.973 0.00275 **
## ---
## Signif. codes:  0 '***' 0.001 '**' 0.01 '*' 0.05 '.' 0.1 ' ' 1
##
## R-sq.(adj) =  0.644
## lmer.REML = 84425  Scale est. = 73529    n = 5412

```

Below are plots of a plot of `s(bl_age)`, `s(bl_age):sleep_z`, `s(bl_age):time`, and `s(sleep_z):time`. For `s(sleep_z):time`, roughly, if we cannot fit a straight line through the confidence bands, there is evidence that the effect of time depends on sleep duration. It is correct that the confidence interval is zero at one point along the axis; this happens because we do not include the main effect.

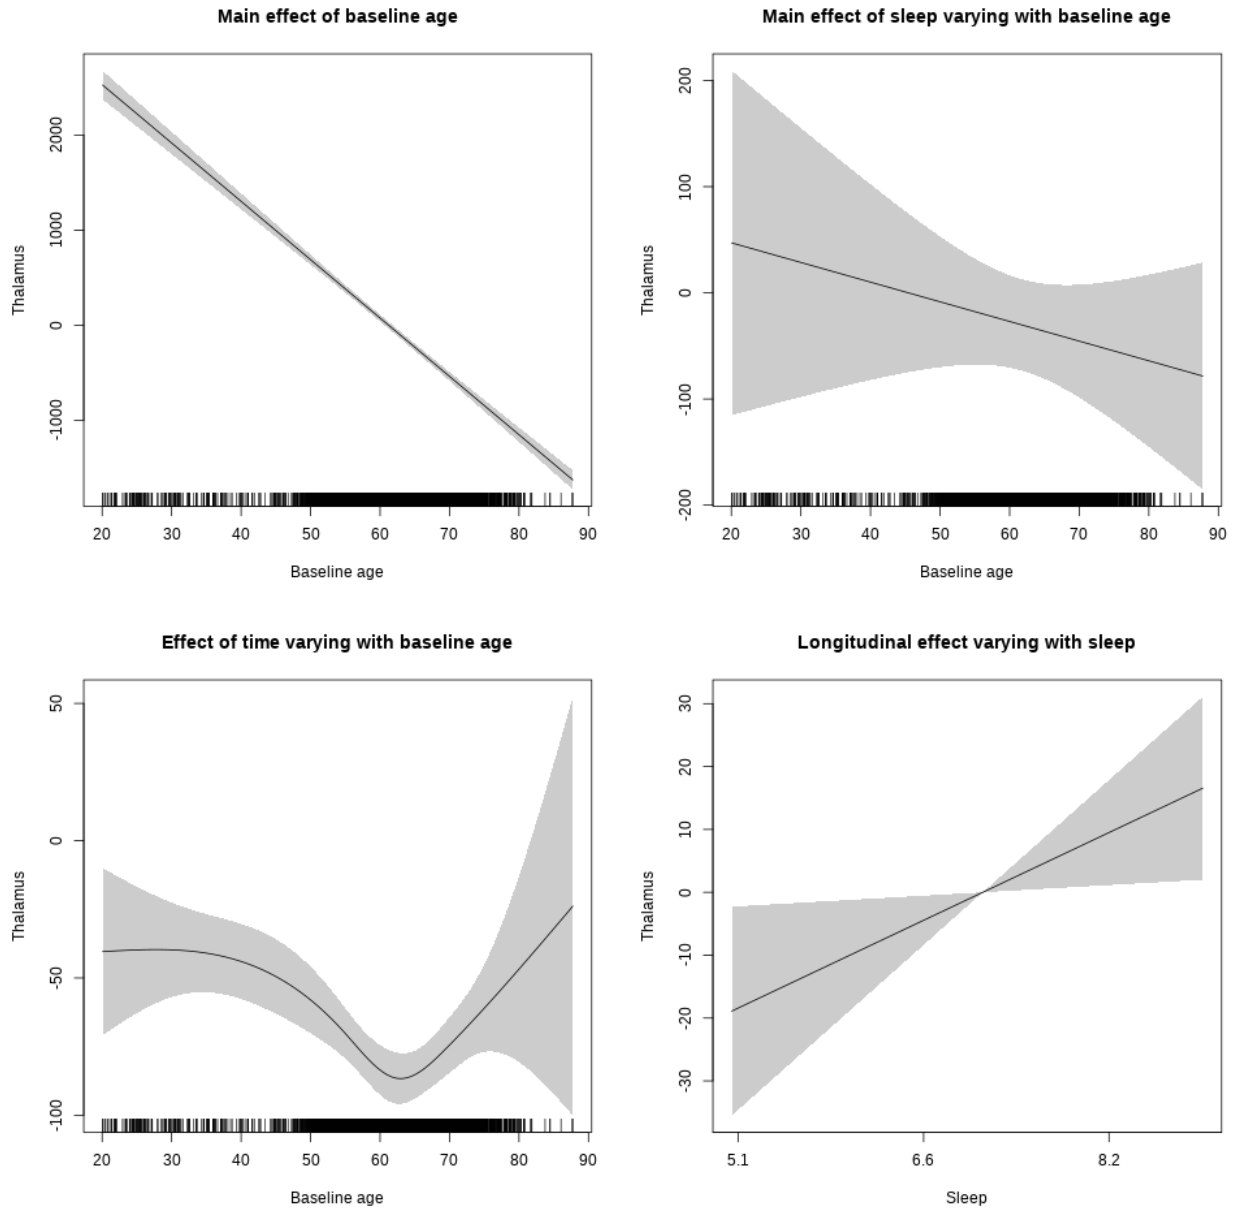

**Restricted to sleep  $\geq 5$  and  $\leq 9$  hours** Below is the row for `s(sleep_z):time` from the model output.

```
## s(sleep_z):time 1.000 1.000 5.175 0.023 *
```

Below are plots of a plot of `s(bl_age)`, `s(bl_age):sleep_z`, `s(bl_age):time`, and `s(sleep_z):time`. For `s(sleep_z):time`, roughly, if we cannot fit a straight line through the confidence bands, there is evidence that the effect of time depends on sleep duration. It is correct that the confidence interval is zero at one point along the axis; this happens because we do not include the main effect.

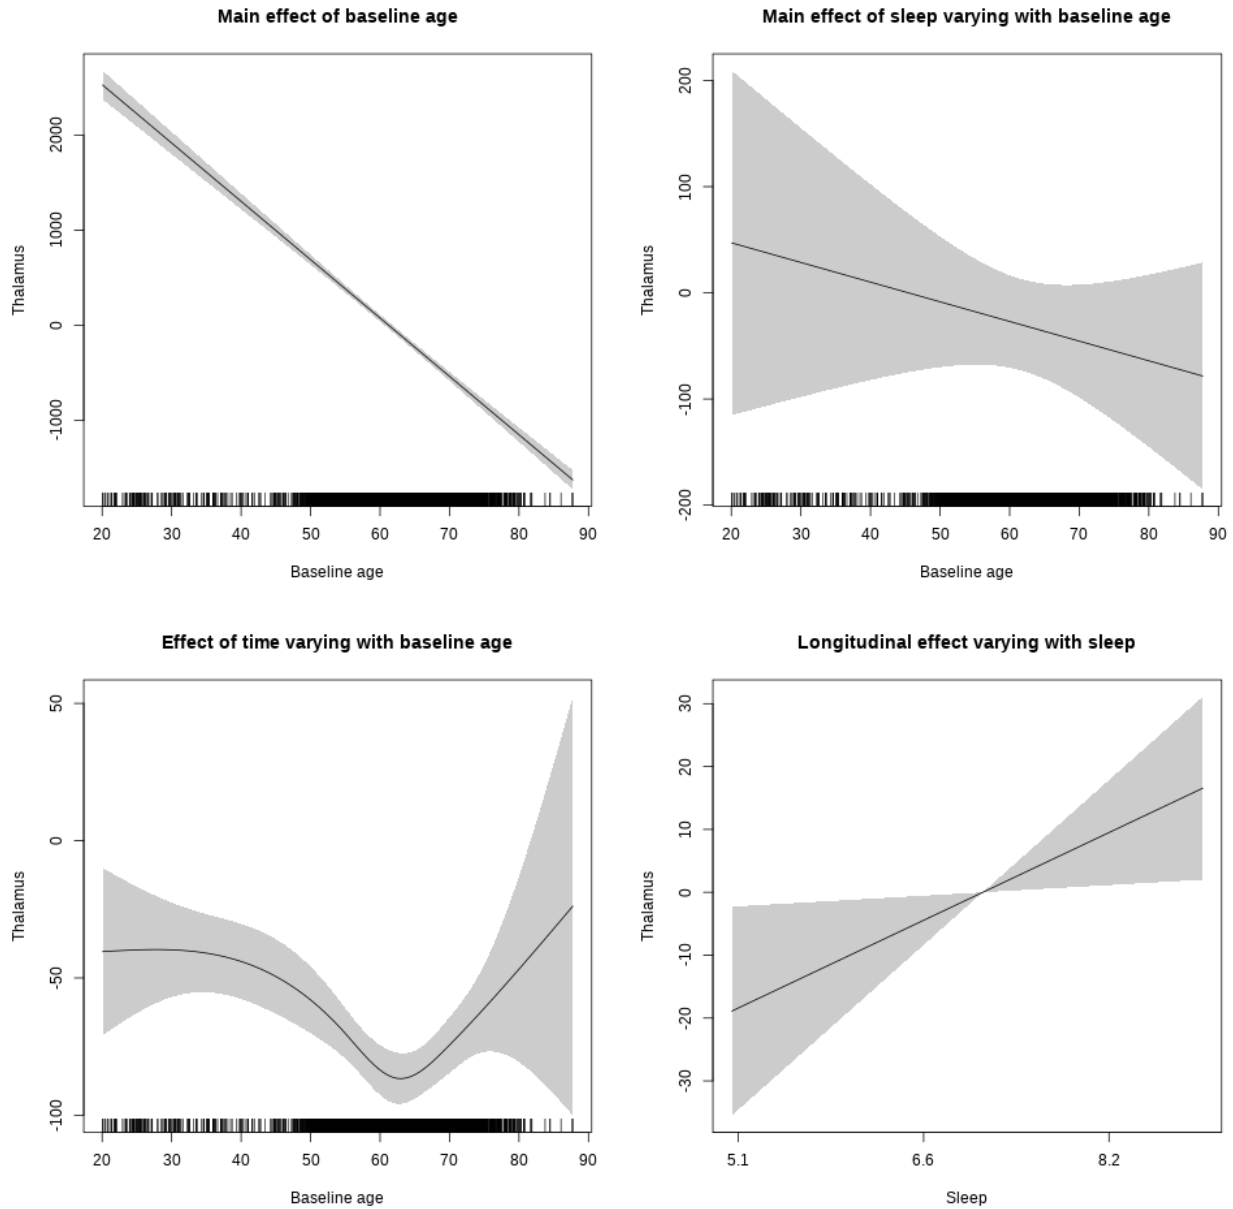

### Controlling for depression

**Full data** Below is the model output. The term `s(sleep_z):time` is probably what we care most about.

```
##
## Family: gaussian
## Link function: identity
##
## Formula:
## value ~ sex + site + depression + icv + s(bl_age, k = 10, bs = "cr") +
##       s(bl_age, by = sleep_z, bs = "cr") + +s(bl_age, by = time,
##       k = 5, bs = "cr") + s(sleep_z, by = time, k = 5, bs = "cr",
##       pc = 0)
```

```

## <environment: 0x563910fb0378>
##
## Parametric coefficients:
##           Estimate Std. Error t value Pr(>|t|)
## (Intercept) 15029.29     82.09 183.084 < 2e-16 ***
## sexmale      172.68      42.88   4.027 5.71e-05 ***
## siteousAvanto -1391.76    174.36  -7.982 1.73e-15 ***
## siteousPrisma -1173.10    300.27  -3.907 9.46e-05 ***
## siteousSkyra -1012.24    150.65  -6.719 2.01e-11 ***
## siteUCAM      -532.94     99.92  -5.334 9.98e-08 ***
## siteUKB       -1329.19    75.55 -17.593 < 2e-16 ***
## siteUmU       -1300.74    120.45 -10.799 < 2e-16 ***
## depression    -258.94    150.84  -1.717 0.0861 .
## icv           882.67     20.62  42.808 < 2e-16 ***
## ---
## Signif. codes:  0 '***' 0.001 '**' 0.01 '*' 0.05 '.' 0.1 ' ' 1
##
## Approximate significance of smooth terms:
##           edf Ref.df      F p-value
## s(bl_age)      5.091  5.091 200.242 <2e-16 ***
## s(bl_age):sleep_z 2.000  2.000   1.626 0.1968
## s(bl_age):time  2.891  2.891 237.956 <2e-16 ***
## s(sleep_z):time 1.000  1.000   4.606 0.0319 *
## ---
## Signif. codes:  0 '***' 0.001 '**' 0.01 '*' 0.05 '.' 0.1 ' ' 1
##
## R-sq.(adj) = 0.618
## lmer.REML = 88636 Scale est. = 71111 n = 5679

```

Below are plots of a plot of `s(bl_age)`, `s(bl_age):sleep_z`, `s(bl_age):time`, and `s(sleep_z):time`. For `s(sleep_z):time`, roughly, if we cannot fit a straight line through the confidence bands, there is evidence that the effect of time depends on sleep duration. It is correct that the confidence interval is zero at one point along the axis; this happens because we do not include the main effect.

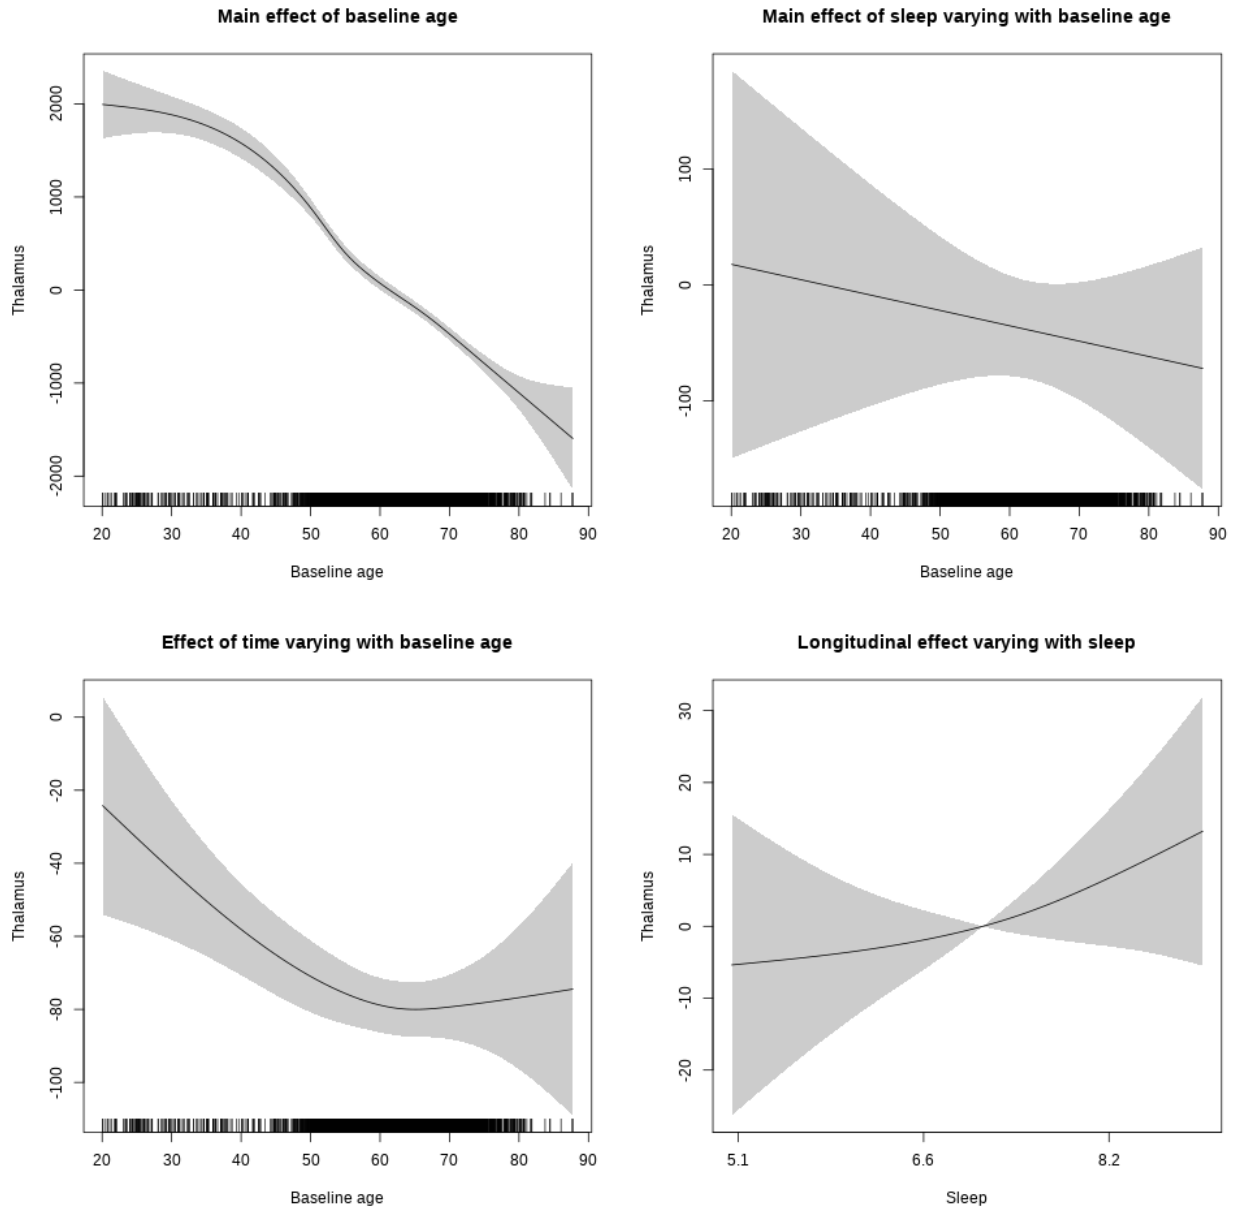

**Restricted to sleep  $\geq 5$  and  $\leq 9$  hours** Below is the row for `s(sleep_z):time` from the model output.

```
## s(sleep_z):time  1.317  1.317  0.886  0.269
```

Below are plots of a plot of `s(bl_age)`, `s(bl_age):sleep_z`, `s(bl_age):time`, and `s(sleep_z):time`. For `s(sleep_z):time`, roughly, if we cannot fit a straight line through the confidence bands, there is evidence that the effect of time depends on sleep duration. It is correct that the confidence interval is zero at one point along the axis; this happens because we do not include the main effect.



### Controlling for sleep quality

**Full data** Below is the model output. The term `s(sleep_z):time` is probably what we care most about.

```
##
## Family: gaussian
## Link function: identity
##
## Formula:
## value ~ X + s(bl_age, k = 10, bs = "cr") + s(bl_age, by = sleep_z,
##       bs = "cr") + s(bl_age, by = time, k = 5, bs = "cr") + s(sleep_z,
##       by = time, k = 5, bs = "cr", pc = 0)
## <environment: 0x563914d995c8>
```

```

##
## Parametric coefficients:
##           Estimate Std. Error t value Pr(>|t|)
## (Intercept)      13395.43    148.41  90.263 < 2e-16 ***
## Xsexmale          1139.87     55.51  20.534 < 2e-16 ***
## XsiteousAvanto     414.63    141.84   2.923 0.00348 **
## XsiteousPrisma    1294.26    248.77   5.203 2.06e-07 ***
## XsiteousSkyra      259.72    142.22   1.826 0.06790 .
## XsiteUB            709.72    225.35   3.149 0.00165 **
## XsiteUCAM          981.53    145.69   6.737 1.83e-11 ***
## XsiteUKB           55.23    453.67   0.122 0.90311
## XsiteUmU          -354.61    161.60  -2.194 0.02826 *
## Xukb_dummy:sleep_accel  35.87    35.13   1.021 0.30725
## Xukb_dummy:chronotype  40.01    46.51   0.860 0.38965
## Xukb_dummy:dozing    42.45    95.97   0.442 0.65829
## Xukb_dummy:sleeplessness -188.93    59.86  -3.156 0.00161 **
## Xukb_dummy:snoring   -14.40    84.71  -0.170 0.86501
## Xukb_dummy:gettingup  19.62    65.11   0.301 0.76318
## Xnotukb_dummy:PSQI_Global -20.75    18.36  -1.130 0.25862
## ---
## Signif. codes:  0 '***' 0.001 '**' 0.01 '*' 0.05 '.' 0.1 ' ' 1
##
## Approximate significance of smooth terms:
##           edf Ref.df      F p-value
## s(bl_age)      3.842  3.842 214.494 < 2e-16 ***
## s(bl_age):sleep_z 2.000  2.000   2.594 0.074851 .
## s(bl_age):time  3.804  3.804 285.641 < 2e-16 ***
## s(sleep_z):time  1.000  1.000  14.047 0.000181 ***
## ---
## Signif. codes:  0 '***' 0.001 '**' 0.01 '*' 0.05 '.' 0.1 ' ' 1
##
## R-sq.(adj) =  0.463
## lmer.REML = 67270 Scale est. = 70944      n = 4284

```

Below are plots of a plot of  $s(\text{bl\_age})$ ,  $s(\text{bl\_age}):\text{sleep\_z}$ ,  $s(\text{bl\_age}):\text{time}$ , and  $s(\text{sleep\_z}):\text{time}$ . For  $s(\text{sleep\_z}):\text{time}$ , roughly, if we cannot fit a straight line through the confidence bands, there is evidence that the effect of time depends on sleep duration. It is correct that that confidence interval is zero at one point along the axis; this happens because we do not include the main effect.

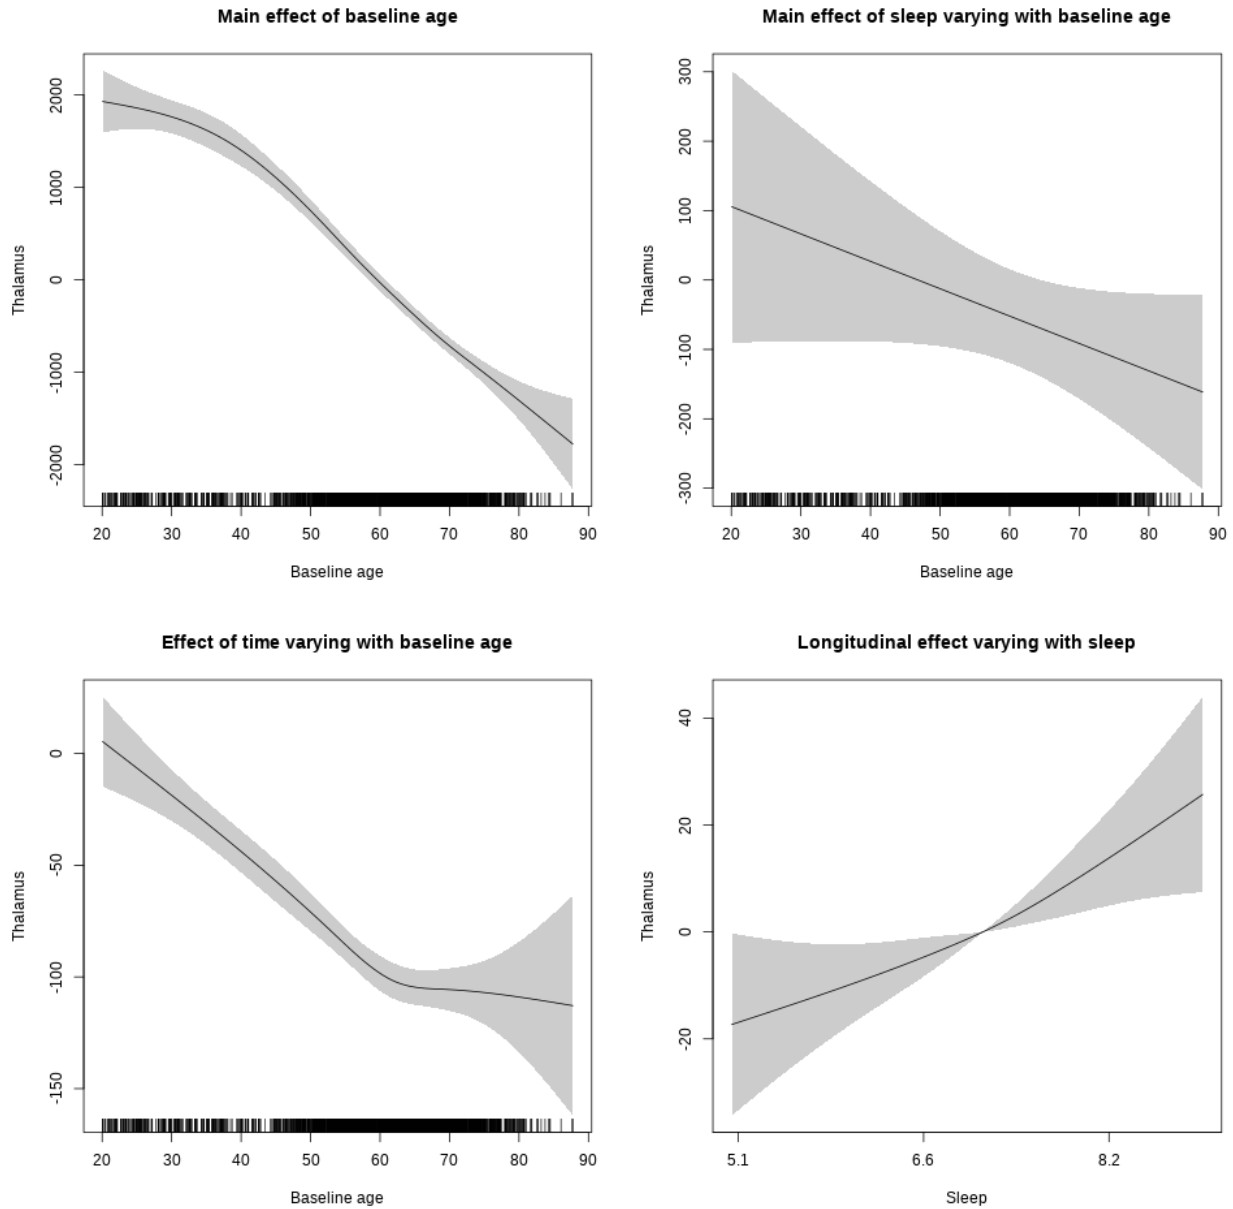

**Restricted to sleep  $\geq 5$  and  $\leq 9$  hours** Below is the row for `s(sleep_z):time` from the model output.

```
## s(sleep_z):time  1.473  1.473  5.768 0.00451 **
```

Below are plots of a plot of `s(bl_age)`, `s(bl_age):sleep_z`, `s(bl_age):time`, and `s(sleep_z):time`. For `s(sleep_z):time`, roughly, if we cannot fit a straight line through the confidence bands, there is evidence that the effect of time depends on sleep duration. It is correct that the confidence interval is zero at one point along the axis; this happens because we do not include the main effect.



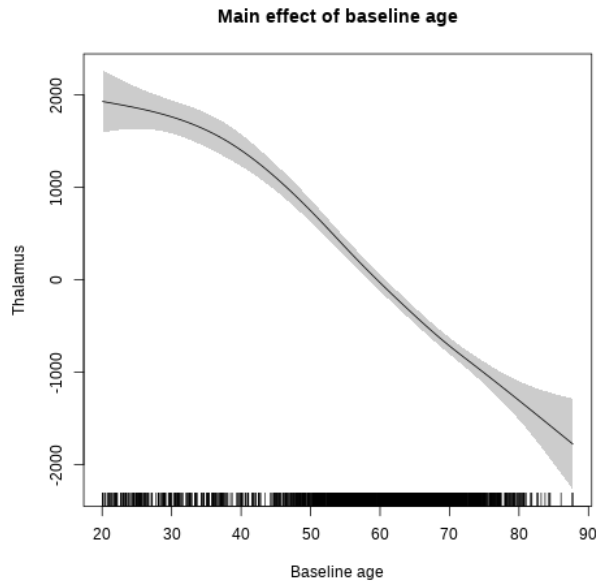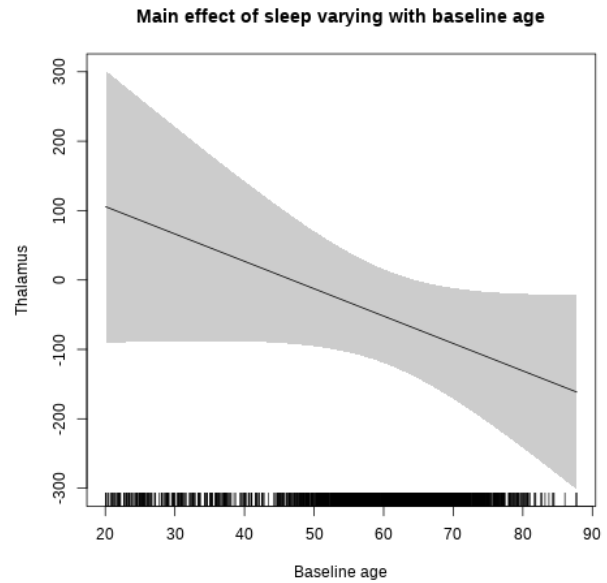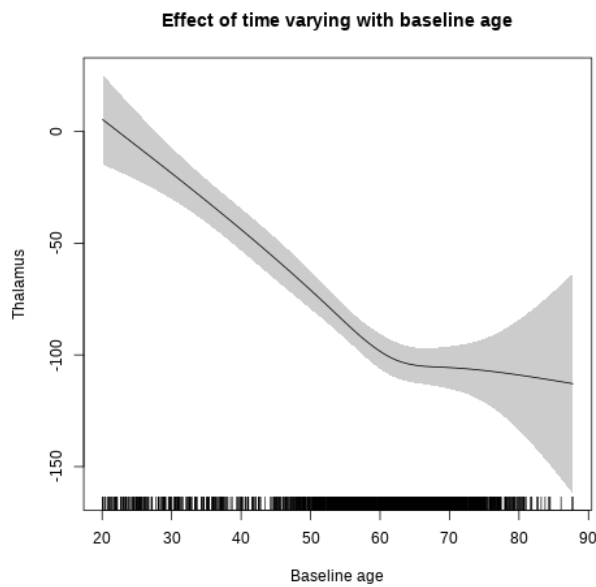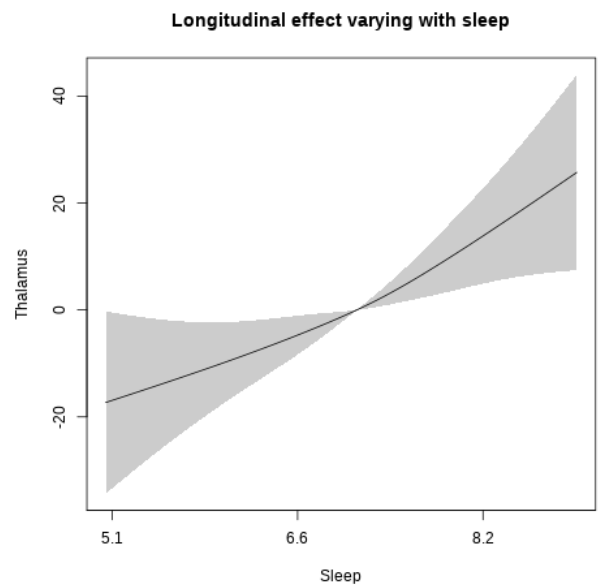

## TotalGrayVol

### Main analysis

**Full data** Below is the model output. The term `s(sleep_z):time` is probably what we care most about.

```
##
## Family: gaussian
## Link function: identity
##
## Formula:
## value ~ sex + site + icv + s(bl_age, k = 10, bs = "cr") + s(bl_age,
##   by = sleep_z, bs = "cr") + +s(bl_age, by = time, k = 5, bs = "cr") +
```

```

##      s(sleep_z, by = time, k = 5, bs = "cr", pc = 0)
## <environment: 0x563911248ae0>
##
## Parametric coefficients:
##              Estimate Std. Error t value Pr(>|t|)
## (Intercept)  663161.6    2098.3  316.049 < 2e-16 ***
## sexmale      16218.2     1079.8   15.020 < 2e-16 ***
## siteousAvanto -60084.4    2584.1  -23.251 < 2e-16 ***
## siteousPrisma -46885.4    8104.3   -5.785 7.51e-09 ***
## siteousSkyra -34623.0    2511.2  -13.787 < 2e-16 ***
## siteUB       -38331.3    4816.6   -7.958 1.98e-15 ***
## siteUCAM     -38678.3    2626.4  -14.727 < 2e-16 ***
## siteUKB       2069.2     1998.9    1.035  0.301
## siteUmU     -23067.1    3001.3   -7.686 1.70e-14 ***
## icv          43972.4     525.3   83.705 < 2e-16 ***
## ---
## Signif. codes:  0 '***' 0.001 '**' 0.01 '*' 0.05 '.' 0.1 ' ' 1
##
## Approximate significance of smooth terms:
##              edf Ref.df      F p-value
## s(bl_age)      4.701  4.701 510.142 <2e-16 ***
## s(bl_age):sleep_z 2.000  2.000  1.666  0.189
## s(bl_age):time  4.062  4.062 256.529 <2e-16 ***
## s(sleep_z):time 1.000  1.000  0.316  0.574
## ---
## Signif. codes:  0 '***' 0.001 '**' 0.01 '*' 0.05 '.' 0.1 ' ' 1
##
## R-sq.(adj) =  0.805
## lmer.REML = 1.8416e+05  Scale est. = 1.0252e+08  n = 8152

```

Below are plots of a plot of  $s(\text{bl\_age})$ ,  $s(\text{bl\_age}):\text{sleep\_z}$ ,  $s(\text{bl\_age}):\text{time}$ , and  $s(\text{sleep\_z}):\text{time}$ . For  $s(\text{sleep\_z}):\text{time}$ , roughly, if we cannot fit a straight line through the confidence bands, there is evidence that the effect of time depends on sleep duration. It is correct that the confidence interval is zero at one point along the axis; this happens because we do not include the main effect.

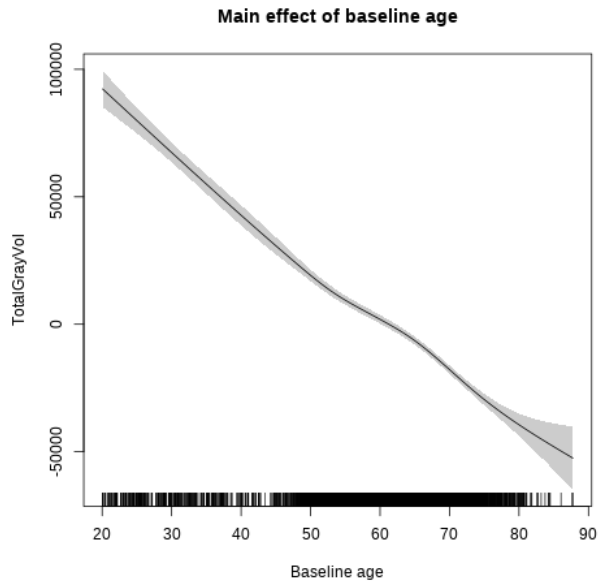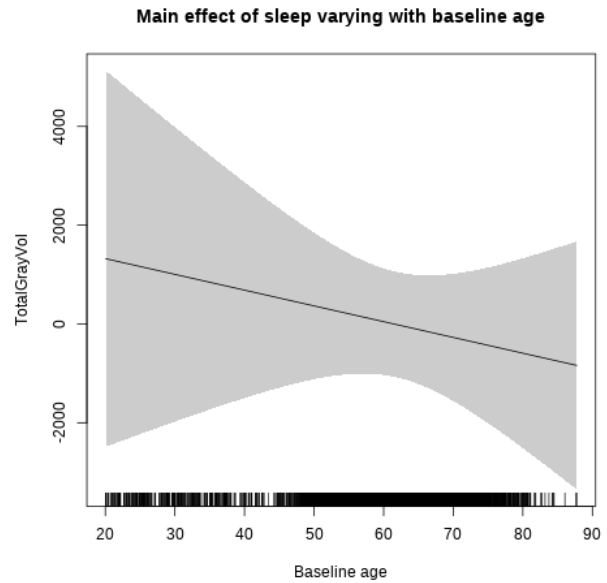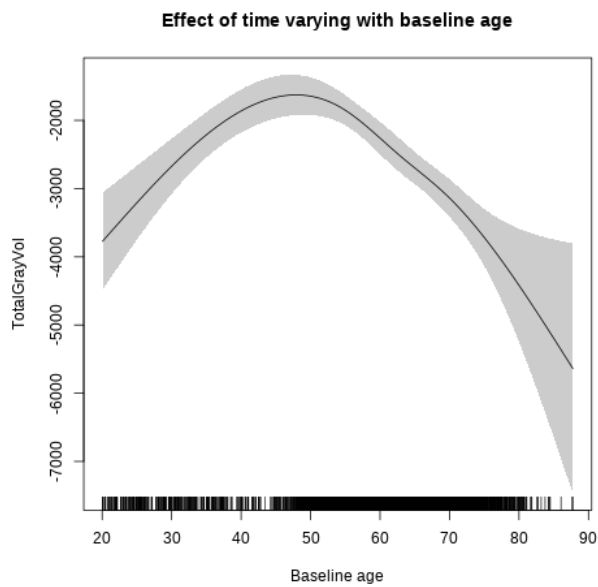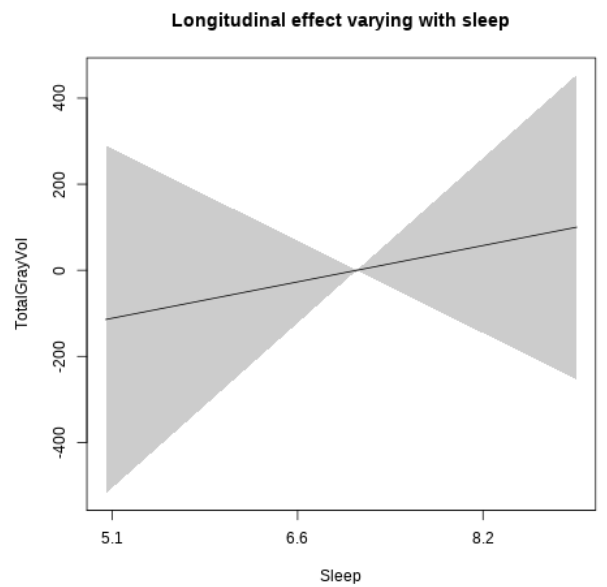

**Restricted to sleep  $\geq 5$  and  $\leq 9$  hours** Below is the row for `s(sleep_z):time` from the model output.

```
## s(sleep_z):time  1.000  1.000  0.320  0.572
```

Below are plots of a plot of `s(bl_age)`, `s(bl_age):sleep_z`, `s(bl_age):time`, and `s(sleep_z):time`. For `s(sleep_z):time`, roughly, if we cannot fit a straight line through the confidence bands, there is evidence that the effect of time depends on sleep duration. It is correct that the confidence interval is zero at one point along the axis; this happens because we do not include the main effect.

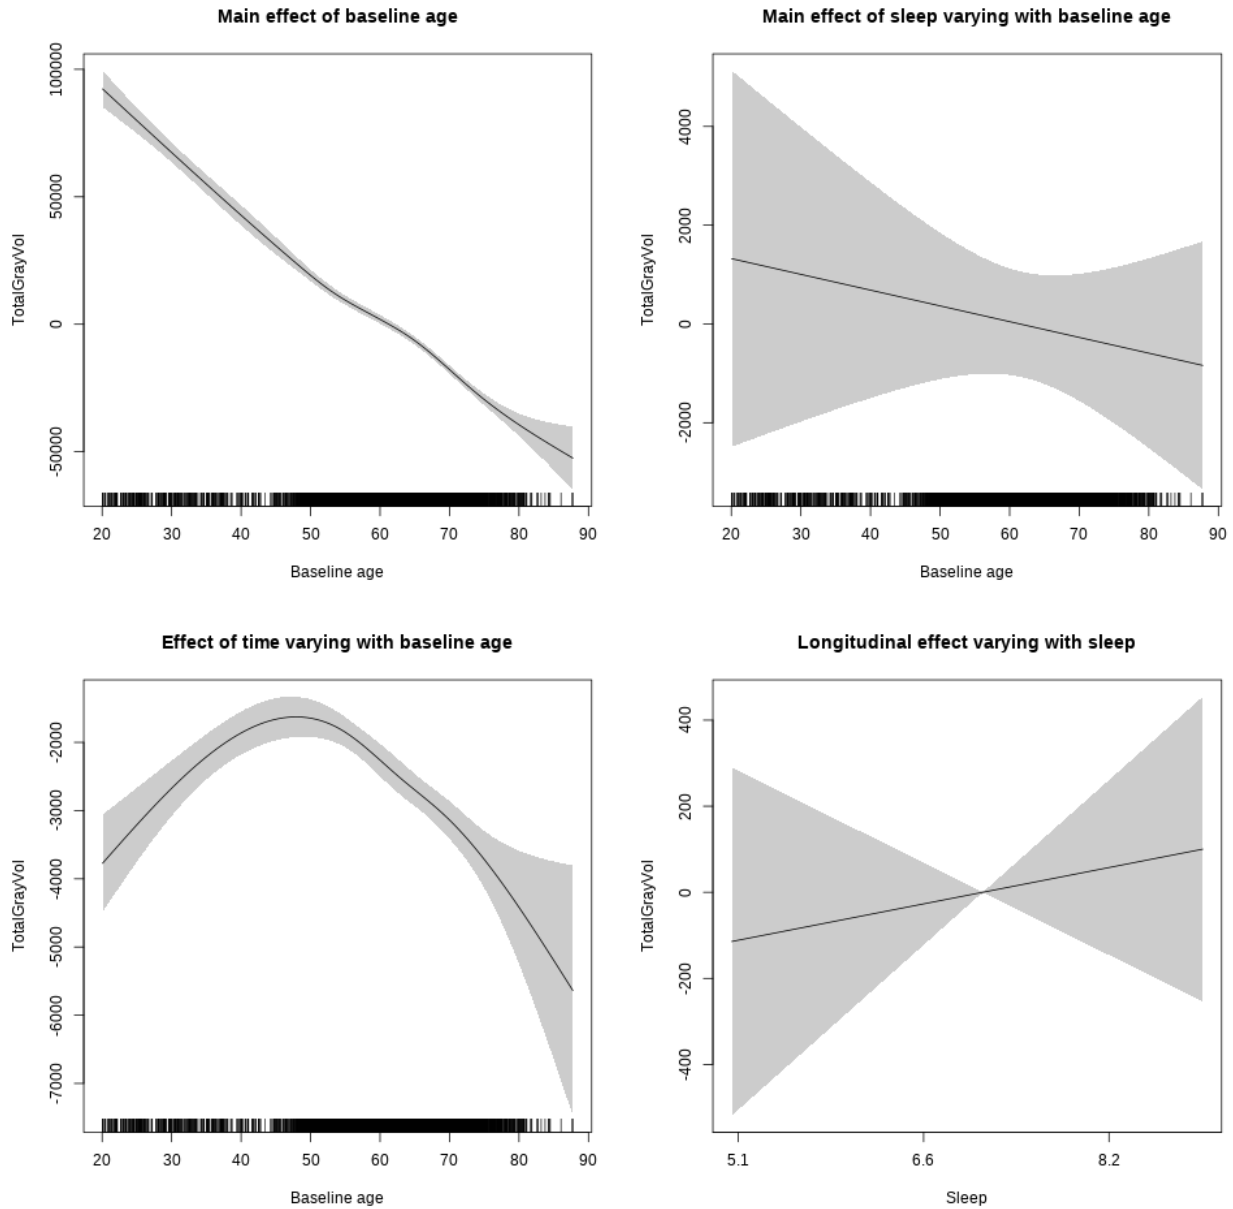

### Controlling for socioeconomic status

**Full data** Below is the model output. The term `s(sleep_z):time` is probably what we care most about.

```
##
## Family: gaussian
## Link function: identity
##
## Formula:
## value ~ sex + site + income_scaled + education_scaled + icv +
##       s(bl_age, k = 10, bs = "cr") + s(bl_age, by = sleep_z, bs = "cr") +
##       +s(bl_age, by = time, k = 5, bs = "cr") + s(sleep_z, by = time,
##       k = 5, bs = "cr", pc = 0)
```

```

## <environment: 0x563911590e78>
##
## Parametric coefficients:
##           Estimate Std. Error t value Pr(>|t|)
## (Intercept)  678565.2    4973.5 136.436 < 2e-16 ***
## sexmale      14964.2     1366.3  10.953 < 2e-16 ***
## siteousAvanto -82081.7    5627.5 -14.586 < 2e-16 ***
## siteousPrisma -61767.0   14204.3  -4.348 1.4e-05 ***
## siteousSkyra -50177.8    5066.8  -9.903 < 2e-16 ***
## siteUKB      -14979.3    4707.1  -3.182 0.00147 **
## income_scaled  2213.5     1744.5   1.269 0.20457
## education_scaled -1300.8    1925.2  -0.676 0.49928
## icv          47185.8     686.4  68.747 < 2e-16 ***
## ---
## Signif. codes:  0 '***' 0.001 '**' 0.01 '*' 0.05 '.' 0.1 ' ' 1
##
## Approximate significance of smooth terms:
##           edf Ref.df      F p-value
## s(bl_age)      4.310  4.310 200.061 <2e-16 ***
## s(bl_age):sleep_z 2.000  2.000   1.089   0.337
## s(bl_age):time  3.781  3.781  71.819 <2e-16 ***
## s(sleep_z):time  3.289  3.289   1.536   0.109
## ---
## Signif. codes:  0 '***' 0.001 '**' 0.01 '*' 0.05 '.' 0.1 ' ' 1
##
## R-sq.(adj) =  0.794
## lmer.REML = 1.0532e+05  Scale est. = 1.1889e+08  n = 4648

```

Below are plots of a plot of  $s(\text{bl\_age})$ ,  $s(\text{bl\_age}):\text{sleep\_z}$ ,  $s(\text{bl\_age}):\text{time}$ , and  $s(\text{sleep\_z}):\text{time}$ . For  $s(\text{sleep\_z}):\text{time}$ , roughly, if we cannot fit a straight line through the confidence bands, there is evidence that the effect of time depends on sleep duration. It is correct that the confidence interval is zero at one point along the axis; this happens because we do not include the main effect.

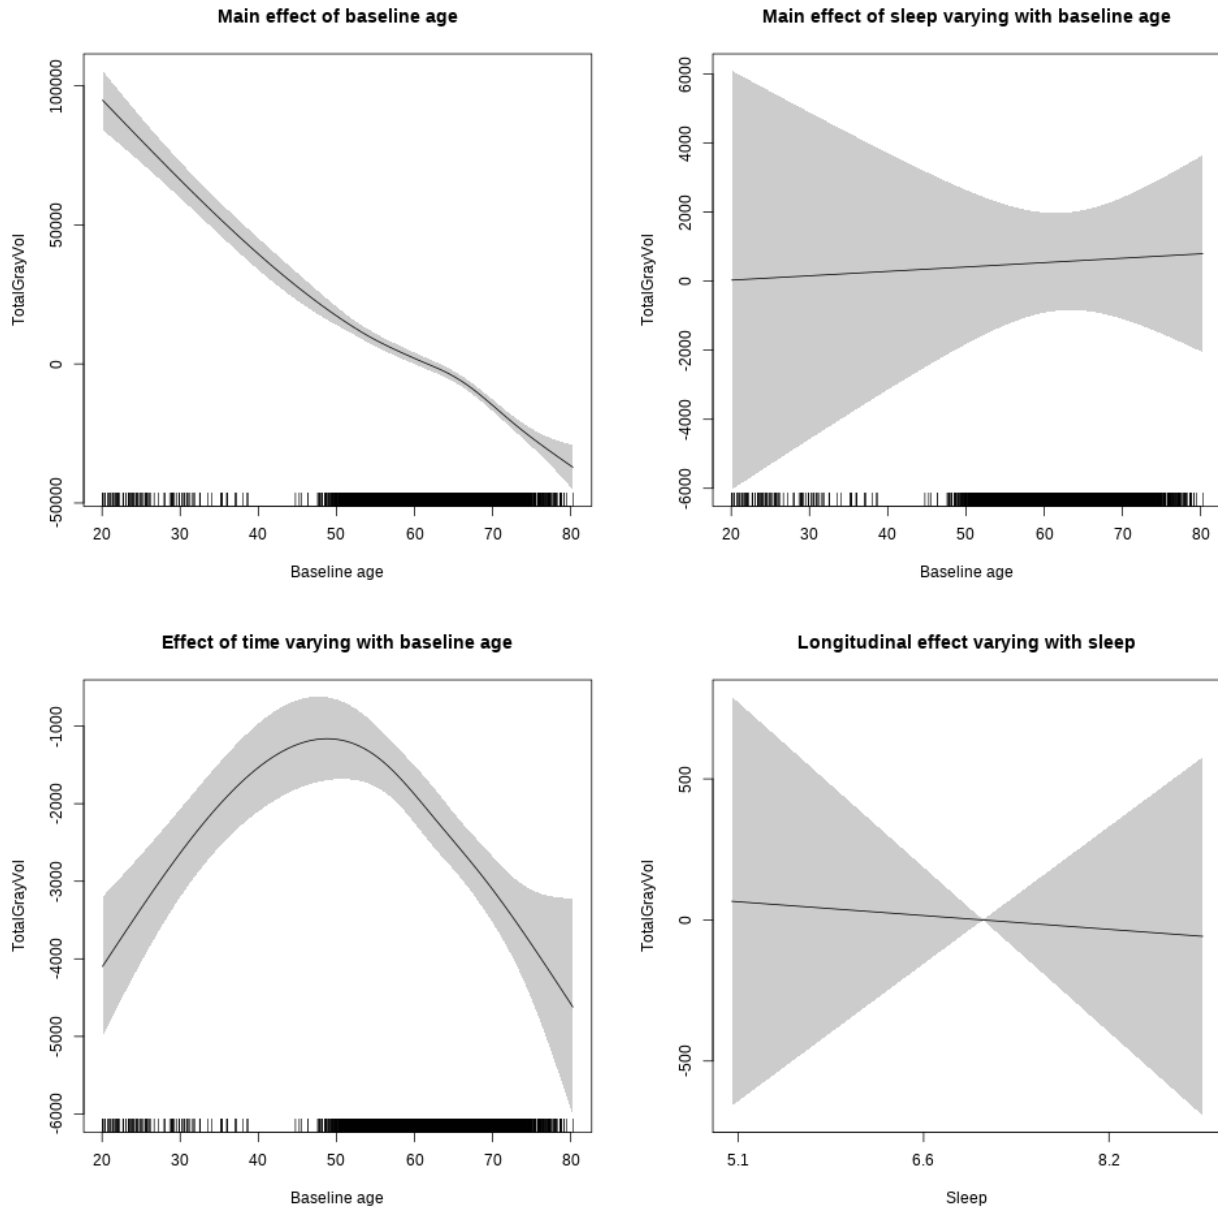

**Restricted to sleep  $\geq 5$  and  $\leq 9$  hours** Below is the row for `s(sleep_z):time` from the model output.

```
## s(sleep_z):time 1.000 1.000 0.033 0.855
```

Below are plots of a plot of `s(bl_age)`, `s(bl_age):sleep_z`, `s(bl_age):time`, and `s(sleep_z):time`. For `s(sleep_z):time`, roughly, if we cannot fit a straight line through the confidence bands, there is evidence that the effect of time depends on sleep duration. It is correct that the confidence interval is zero at one point along the axis; this happens because we do not include the main effect.



## Controlling for BMI

**Full data** Below is the model output. The term `s(sleep_z):time` is probably what we care most about.

```
##
## Family: gaussian
## Link function: identity
##
## Formula:
## value ~ sex + site + bmi + icv + s(bl_age, k = 10, bs = "cr") +
##   s(bl_age, by = sleep_z, bs = "cr") + s(bl_age, by = time,
##     k = 5, bs = "cr") + s(sleep_z, by = time, k = 5, bs = "cr",
##     pc = 0)
```

```

## <environment: 0x563916b28678>
##
## Parametric coefficients:
##           Estimate Std. Error t value Pr(>|t|)
## (Intercept) 602881.9   4609.0 130.805 < 2e-16 ***
## sexmale     15186.1   1238.3  12.263 < 2e-16 ***
## siteousPrisma 15280.9   8384.7   1.822  0.0684 .
## siteousSkyra 30008.1   2627.8  11.419 < 2e-16 ***
## siteUCAM    25136.5   3649.5   6.888 6.32e-12 ***
## siteUKB     63166.5   3442.1  18.351 < 2e-16 ***
## siteUmU     41713.5   4091.9  10.194 < 2e-16 ***
## bmi         -81.9     127.8  -0.641  0.5216
## icv         46731.1   619.3   75.462 < 2e-16 ***
## ---
## Signif. codes:  0 '***' 0.001 '**' 0.01 '*' 0.05 '.' 0.1 ' ' 1
##
## Approximate significance of smooth terms:
##           edf Ref.df      F p-value
## s(bl_age)      4.335  4.335 329.496 <2e-16 ***
## s(bl_age):sleep_z 2.209  2.209   0.567   0.641
## s(bl_age):time  3.787  3.787  82.965 <2e-16 ***
## s(sleep_z):time  3.196  3.196   2.813   0.146
## ---
## Signif. codes:  0 '***' 0.001 '**' 0.01 '*' 0.05 '.' 0.1 ' ' 1
##
## R-sq.(adj) =  0.806
## lmer.REML = 1.2233e+05  Scale est. = 1.1075e+08  n = 5410

```

Below are plots of a plot of `s(bl_age)`, `s(bl_age):sleep_z`, `s(bl_age):time`, and `s(sleep_z):time`. For `s(sleep_z):time`, roughly, if we cannot fit a straight line through the confidence bands, there is evidence that the effect of time depends on sleep duration. It is correct that the confidence interval is zero at one point along the axis; this happens because we do not include the main effect.



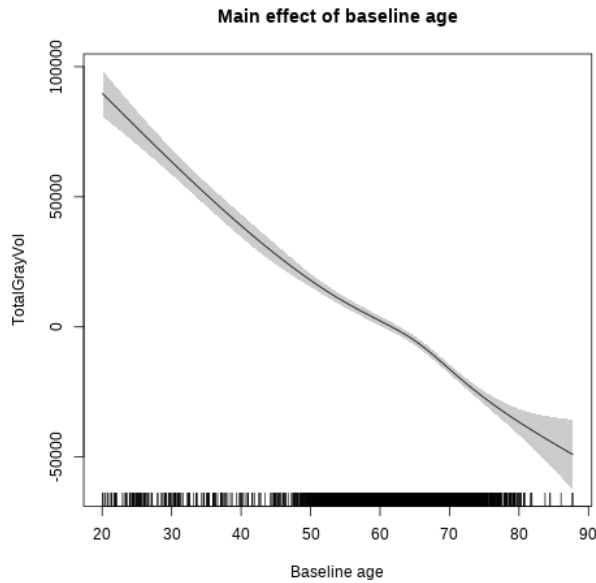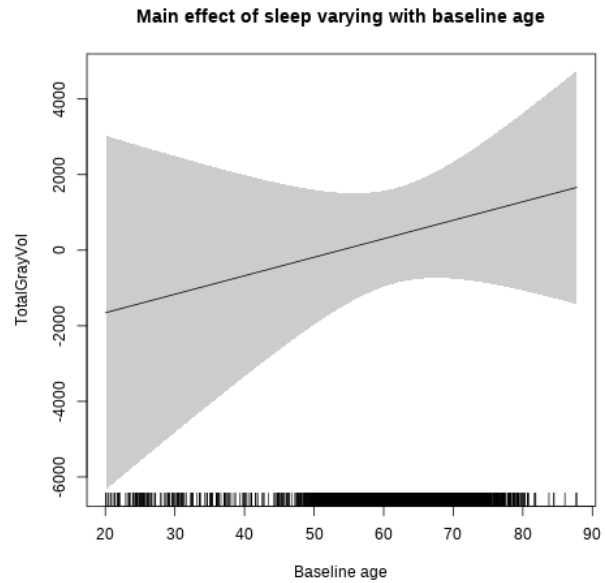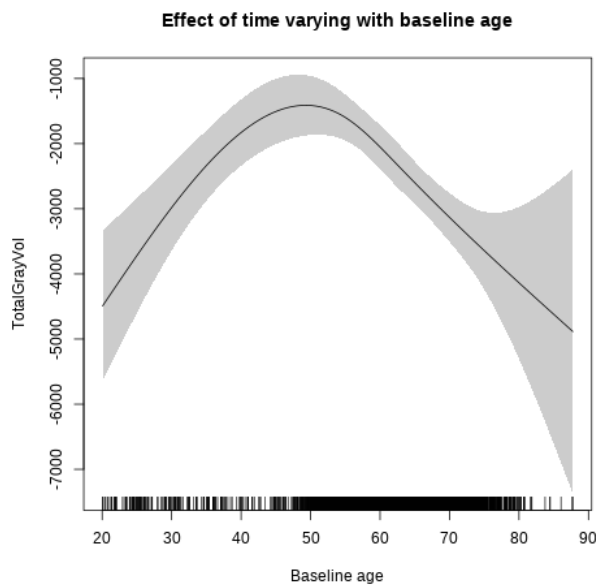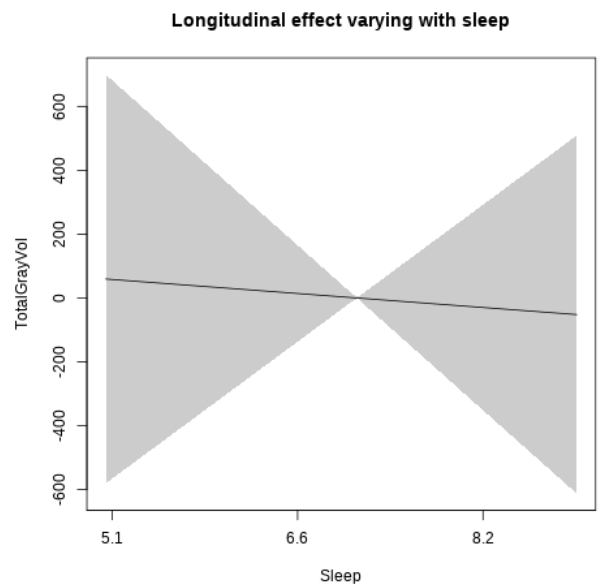

**Restricted to sleep  $\geq 5$  and  $\leq 9$  hours** Below is the row for `s(sleep_z):time` from the model output.

```
## s(sleep_z):time  1.000  1.000  0.034  0.853
```

Below are plots of a plot of `s(bl_age)`, `s(bl_age):sleep_z`, `s(bl_age):time`, and `s(sleep_z):time`. For `s(sleep_z):time`, roughly, if we cannot fit a straight line through the confidence bands, there is evidence that the effect of time depends on sleep duration. It is correct that the confidence interval is zero at one point along the axis; this happens because we do not include the main effect.

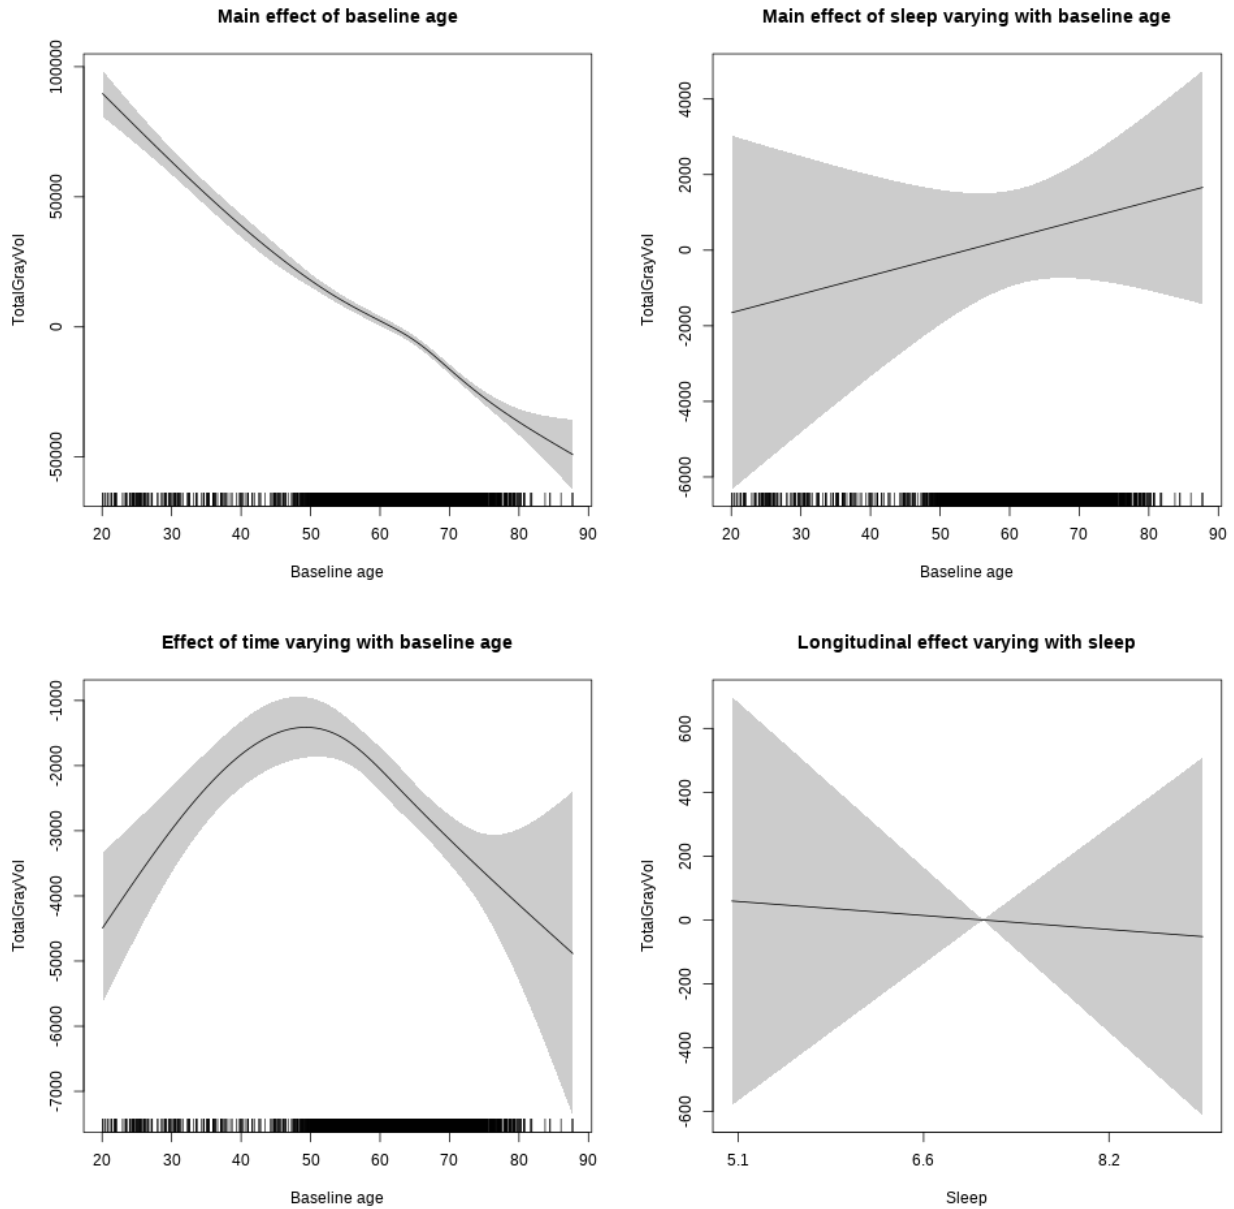

## Controlling for depression

**Full data** Below is the model output. The term `s(sleep_z):time` is probably what we care most about.

```
##
## Family: gaussian
## Link function: identity
##
## Formula:
## value ~ sex + site + depression + icv + s(bl_age, k = 10, bs = "cr") +
##       s(bl_age, by = sleep_z, bs = "cr") + +s(bl_age, by = time,
##       k = 5, bs = "cr") + s(sleep_z, by = time, k = 5, bs = "cr",
##       pc = 0)
```

```

## <environment: 0x563910fa3450>
##
## Parametric coefficients:
##           Estimate Std. Error t value Pr(>|t|)
## (Intercept) 659071.4    2476.4 266.145 < 2e-16 ***
## sexmale     15623.3     1295.4 12.060 < 2e-16 ***
## siteousAvanto -48465.5    5605.9 -8.645 < 2e-16 ***
## siteousPrisma -38577.3   10906.2 -3.537 0.000408 ***
## siteousSkyra -22441.6    4528.6 -4.956 7.42e-07 ***
## siteUCAM    -33190.3    2984.0 -11.123 < 2e-16 ***
## siteUKB      3963.8     2273.3  1.744 0.081282 .
## siteUmU     -13366.1    3614.4 -3.698 0.000219 ***
## depression  -11909.4    4526.2 -2.631 0.008532 **
## icv          44061.0     631.2  69.804 < 2e-16 ***
## ---
## Signif. codes:  0 '***' 0.001 '**' 0.01 '*' 0.05 '.' 0.1 ' ' 1
##
## Approximate significance of smooth terms:
##           edf Ref.df      F p-value
## s(bl_age)      4.129  4.129 263.850 <2e-16 ***
## s(bl_age):sleep_z 2.887  2.887  0.957  0.338
## s(bl_age):time  3.681  3.681 89.125 <2e-16 ***
## s(sleep_z):time  3.216  3.216  2.671  0.211
## ---
## Signif. codes:  0 '***' 0.001 '**' 0.01 '*' 0.05 '.' 0.1 ' ' 1
##
## R-sq.(adj) =  0.792
## lmer.REML = 1.2869e+05  Scale est. = 1.0687e+08  n = 5677

```

Below are plots of a plot of `s(bl_age)`, `s(bl_age):sleep_z`, `s(bl_age):time`, and `s(sleep_z):time`. For `s(sleep_z):time`, roughly, if we cannot fit a straight line through the confidence bands, there is evidence that the effect of time depends on sleep duration. It is correct that the confidence interval is zero at one point along the axis; this happens because we do not include the main effect.

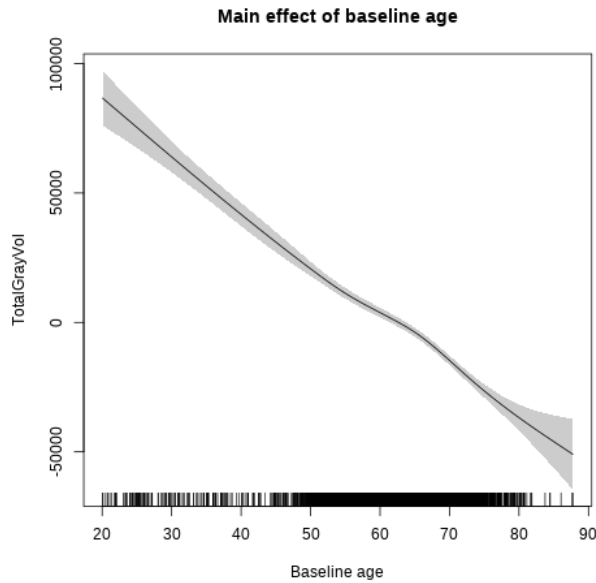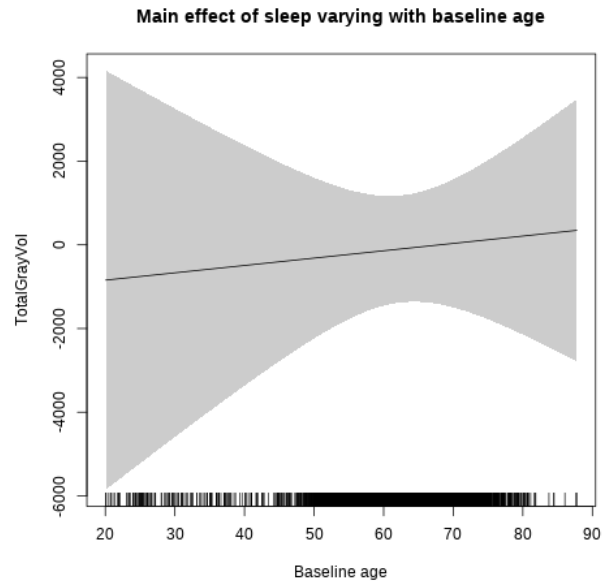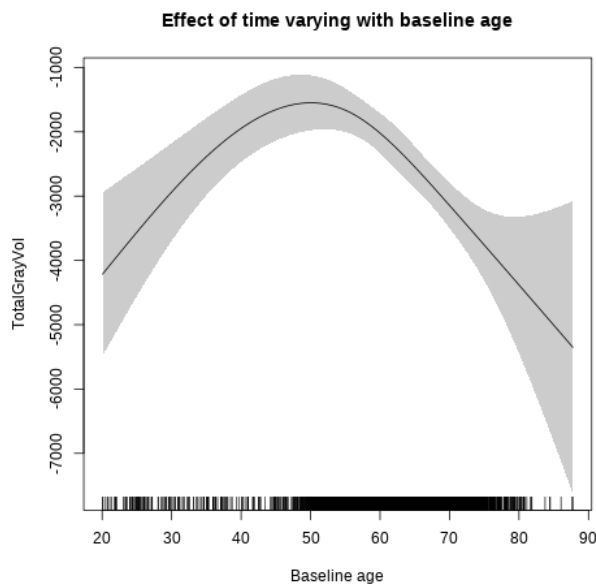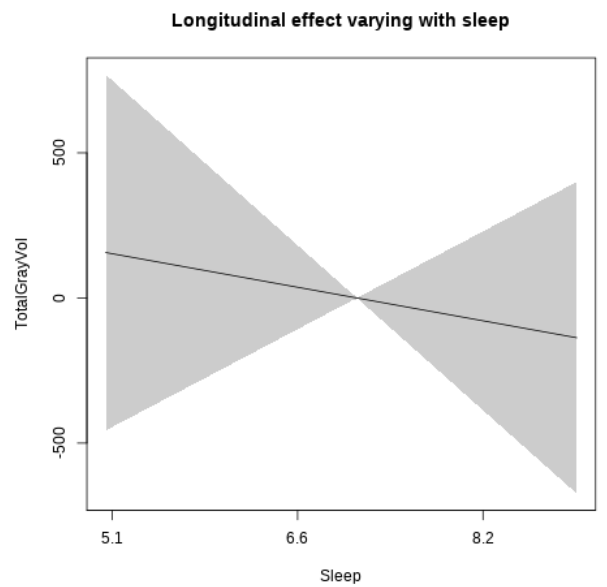

**Restricted to sleep  $\geq 5$  and  $\leq 9$  hours** Below is the row for `s(sleep_z):time` from the model output.

```
## s(sleep_z):time 1.000 1.000 0.261 0.610
```

Below are plots of a plot of `s(bl_age)`, `s(bl_age):sleep_z`, `s(bl_age):time`, and `s(sleep_z):time`. For `s(sleep_z):time`, roughly, if we cannot fit a straight line through the confidence bands, there is evidence that the effect of time depends on sleep duration. It is correct that the confidence interval is zero at one point along the axis; this happens because we do not include the main effect.

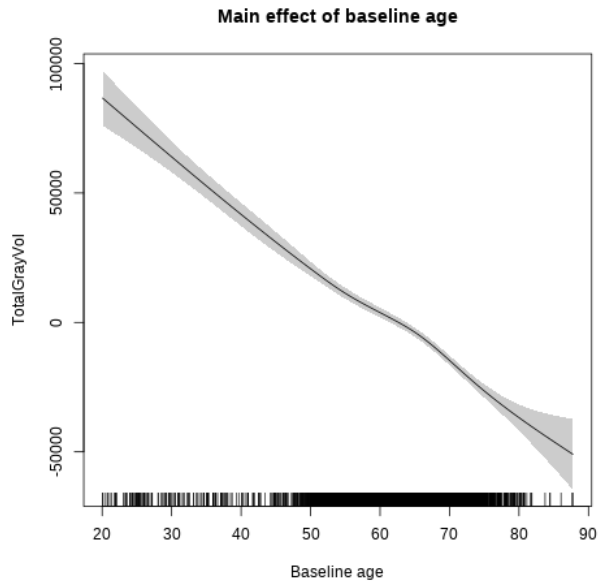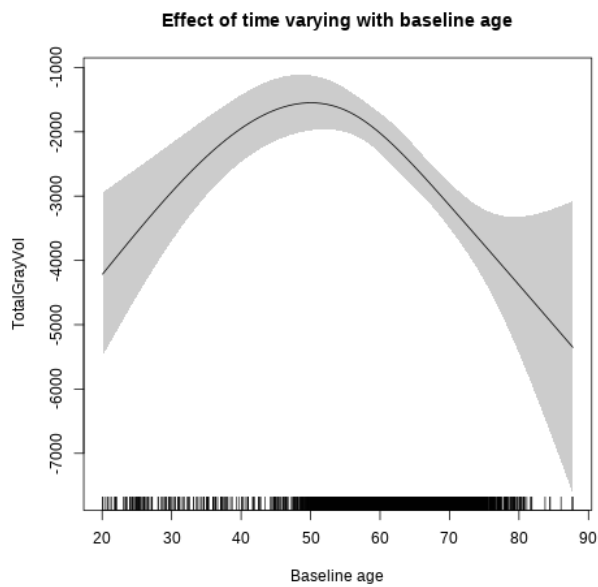

## Controlling for sleep quality

**Full data** Below is the model output. The term `s(sleep_z):time` is probably what we care most about.

```
##
## Family: gaussian
## Link function: identity
##
## Formula:
## value ~ X + s(bl_age, k = 10, bs = "cr") + s(bl_age, by = sleep_z,
##       bs = "cr") + s(bl_age, by = time, k = 5, bs = "cr") + s(sleep_z,
##       by = time, k = 5, bs = "cr", pc = 0)
## <environment: 0x563914d995c8>
```

```

##
## Parametric coefficients:
##              Estimate Std. Error t value Pr(>|t|)
## (Intercept)    576234.1    5556.7 103.702 < 2e-16 ***
## Xsexmale       63767.5     2088.8  30.528 < 2e-16 ***
## XsiteousAvanto 32772.7     5301.9   6.181 6.95e-10 ***
## XsiteousPrisma 65401.2     9397.3   6.960 3.93e-12 ***
## XsiteousSkyra  42428.2     5317.9   7.978 1.89e-15 ***
## XsiteUB        19527.3     8467.9   2.306  0.0212 *
## XsiteUCAM      39294.5     5376.9   7.308 3.22e-13 ***
## XsiteUKB       72094.5    16926.3   4.259 2.09e-05 ***
## XsiteUmU       31453.3     6015.6   5.229 1.79e-07 ***
## Xukb_dummy:sleep_accel -294.4    1321.4  -0.223  0.8237
## Xukb_dummy:chronotype   887.4    1748.3   0.508  0.6118
## Xukb_dummy:dozing      3365.8    3610.1   0.932  0.3512
## Xukb_dummy:sleeplessness -4502.9    2241.2  -2.009  0.0446 *
## Xukb_dummy:snoring     3232.6    3188.5   1.014  0.3107
## Xukb_dummy:gettingup    866.7    2428.9   0.357  0.7212
## Xnotukb_dummy:PSQI_Global -991.4     688.2  -1.441  0.1498
## ---
## Signif. codes:  0 '***' 0.001 '**' 0.01 '*' 0.05 '.' 0.1 ' ' 1
##
## Approximate significance of smooth terms:
##              edf Ref.df      F p-value
## s(bl_age)      1.000  1.000 721.468 <2e-16 ***
## s(bl_age):sleep_z 2.000  2.000   0.573  0.564
## s(bl_age):time  3.818  3.818 207.783 <2e-16 ***
## s(sleep_z):time 1.000  1.000   0.070  0.792
## ---
## Signif. codes:  0 '***' 0.001 '**' 0.01 '*' 0.05 '.' 0.1 ' ' 1
##
## R-sq.(adj) =  0.502
## lmer.REML = 98436 Scale est. = 1.0225e+08 n = 4286

```

Below are plots of a plot of  $s(\text{bl\_age})$ ,  $s(\text{bl\_age}):\text{sleep\_z}$ ,  $s(\text{bl\_age}):\text{time}$ , and  $s(\text{sleep\_z}):\text{time}$ . For  $s(\text{sleep\_z}):\text{time}$ , roughly, if we cannot fit a straight line through the confidence bands, there is evidence that the effect of time depends on sleep duration. It is correct that that confidence interval is zero at one point along the axis; this happens because we do not include the main effect.

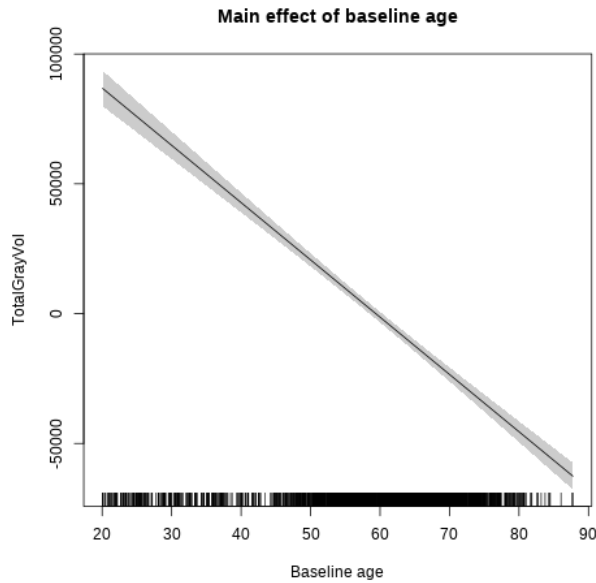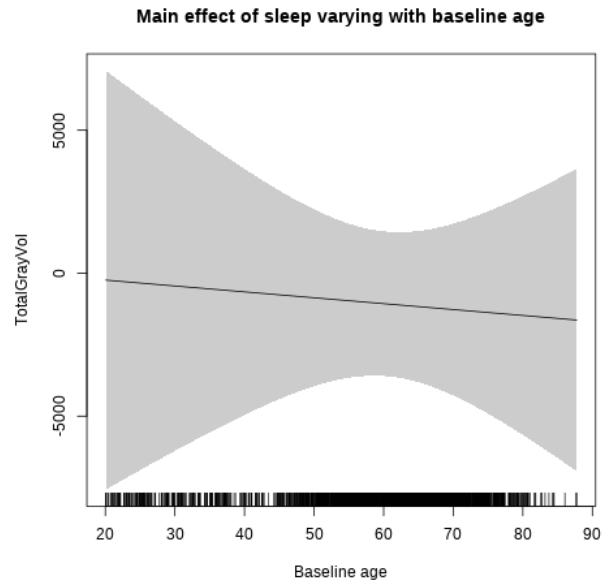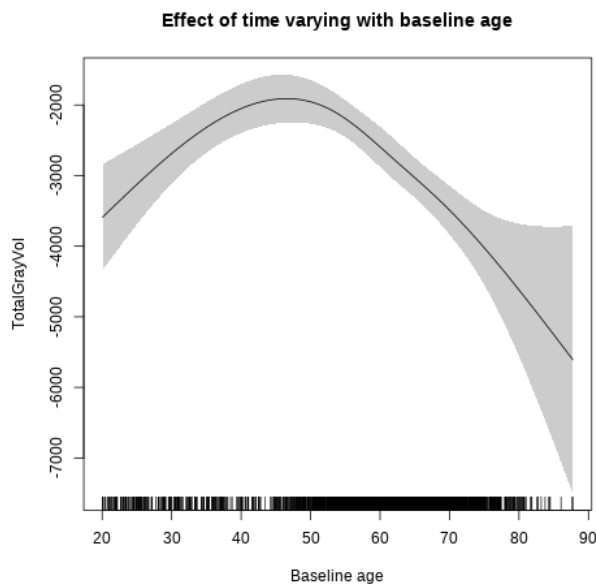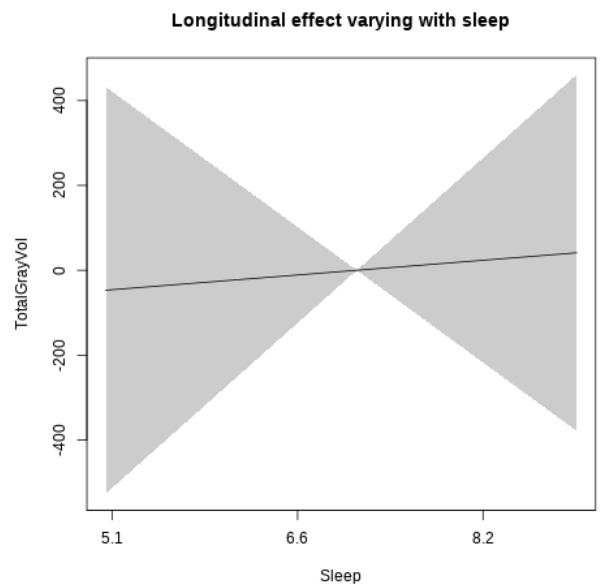

**Restricted to sleep  $\geq 5$  and  $\leq 9$  hours** Below is the row for `s(sleep_z):time` from the model output.

```
## s(sleep_z):time  1.000  1.000  0.038  0.845
```

Below are plots of a plot of `s(bl_age)`, `s(bl_age):sleep_z`, `s(bl_age):time`, and `s(sleep_z):time`. For `s(sleep_z):time`, roughly, if we cannot fit a straight line through the confidence bands, there is evidence that the effect of time depends on sleep duration. It is correct that confidence interval is zero at one point along the axis; this happens because we do not include the main effect.

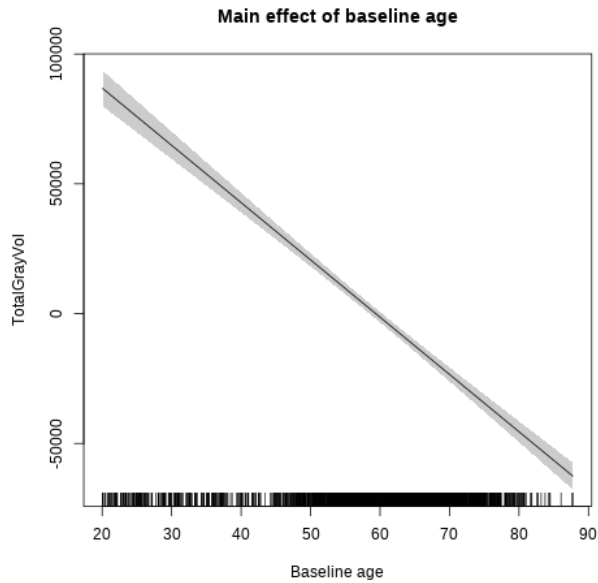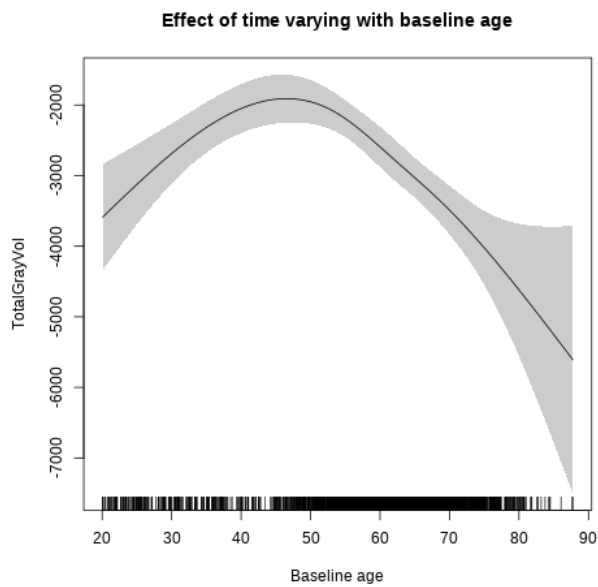

## Ventricles

### Main analysis

**Full data** Below is the model output. The term `s(sleep_z):time` is probably what we care most about.

```
##
## Family: gaussian
## Link function: identity
##
## Formula:
## value ~ sex + site + icv + s(bl_age, k = 10, bs = "cr") + s(bl_age,
##   by = sleep_z, bs = "cr") + +s(bl_age, by = time, k = 5, bs = "cr") +
```



```

##      s(sleep_z, by = time, k = 5, bs = "cr", pc = 0)
## <environment: 0x563911250b18>
##
## Parametric coefficients:
##           Estimate Std. Error t value Pr(>|t|)
## (Intercept)  38884.8      877.9  44.291 < 2e-16 ***
## sexmale      3005.7       449.0   6.694 2.31e-11 ***
## siteousAvanto -8466.6     1087.4  -7.786 7.77e-15 ***
## siteousPrisma -10556.7    1564.9  -6.746 1.63e-11 ***
## siteousSkyra  -5150.1     1066.8  -4.828 1.41e-06 ***
## siteUB       -11340.7    2141.1  -5.297 1.21e-07 ***
## siteUCAM     -7919.5     1135.8  -6.972 3.36e-12 ***
## siteUKB      -10873.6     854.8  -12.720 < 2e-16 ***
## siteUmU      -6191.8     1318.3  -4.697 2.69e-06 ***
## icv          5214.9      183.2   28.470 < 2e-16 ***
## ---
## Signif. codes:  0 '***' 0.001 '**' 0.01 '*' 0.05 '.' 0.1 ' ' 1
##
## Approximate significance of smooth terms:
##           edf Ref.df      F p-value
## s(bl_age)      4.590  4.590 284.669 < 2e-16 ***
## s(bl_age):sleep_z 2.000  2.000   2.107 0.12170
## s(bl_age):time  4.393  4.393 1654.046 < 2e-16 ***
## s(sleep_z):time  1.000  1.000   9.241 0.00237 **
## ---
## Signif. codes:  0 '***' 0.001 '**' 0.01 '*' 0.05 '.' 0.1 ' ' 1
##
## R-sq.(adj) =  0.429
## lmer.REML = 1.6083e+05  Scale est. = 2.0002e+06  n = 8139

```

Below are plots of a plot of  $s(\text{bl\_age})$ ,  $s(\text{bl\_age}):\text{sleep\_z}$ ,  $s(\text{bl\_age}):\text{time}$ , and  $s(\text{sleep\_z}):\text{time}$ . For  $s(\text{sleep\_z}):\text{time}$ , roughly, if we cannot fit a straight line through the confidence bands, there is evidence that the effect of time depends on sleep duration. It is correct that the confidence interval is zero at one point along the axis; this happens because we do not include the main effect.

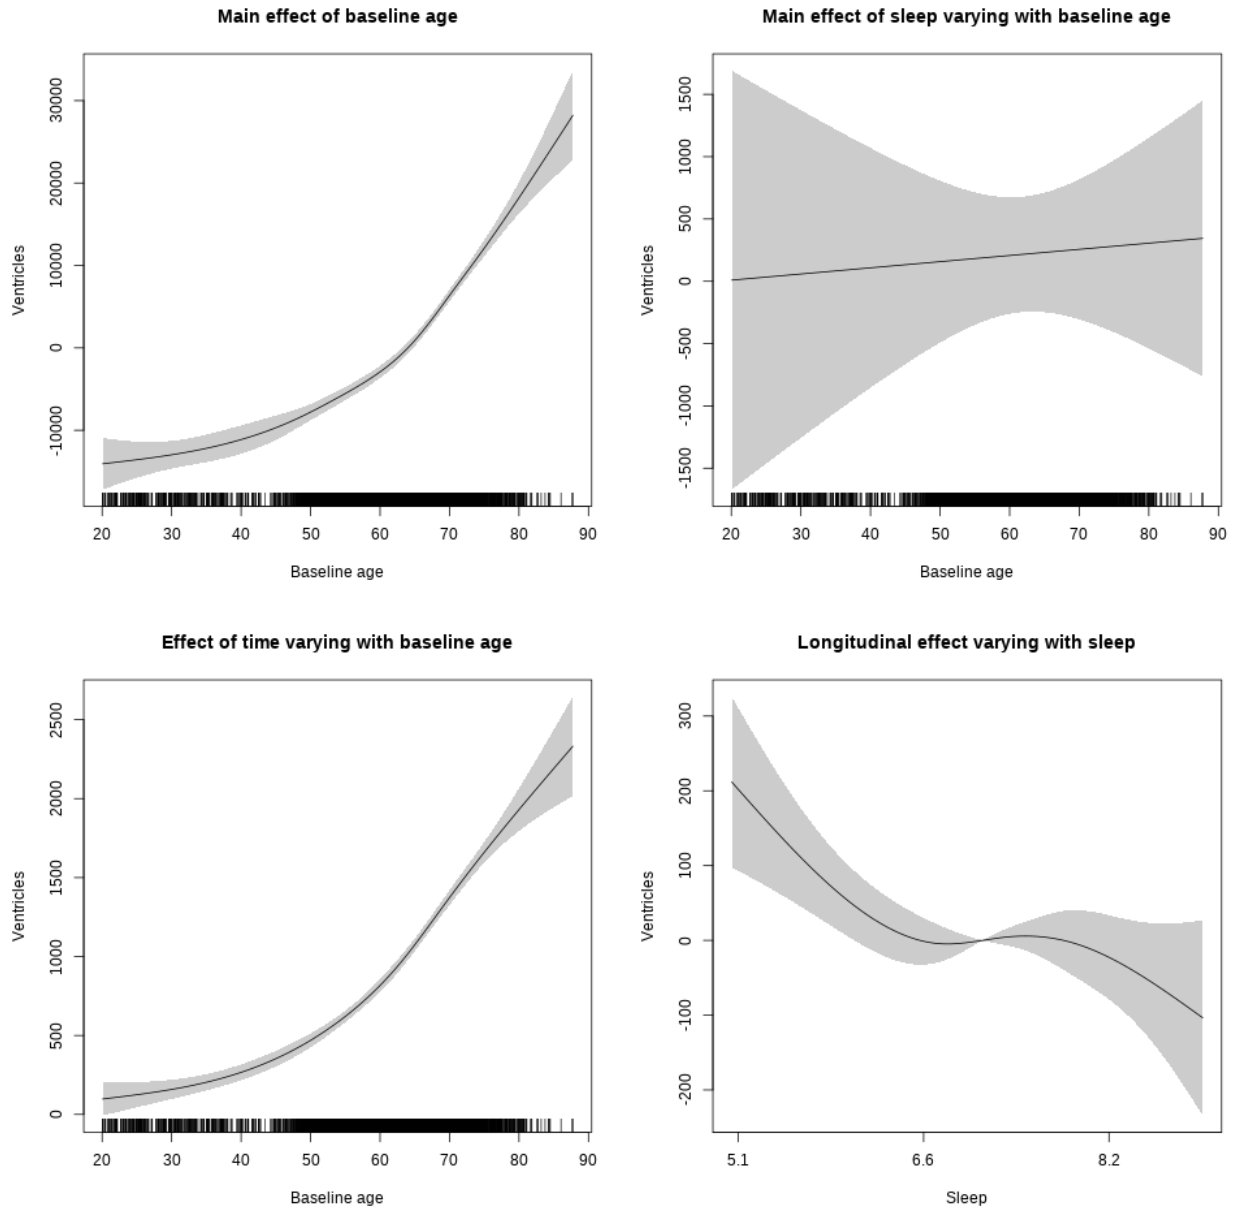

**Restricted to sleep  $\geq 5$  and  $\leq 9$  hours** Below is the row for `s(sleep_z):time` from the model output.

```
## s(sleep_z):time  2.860  2.860   4.558  0.0022 **
```

Below are plots of a plot of `s(bl_age)`, `s(bl_age):sleep_z`, `s(bl_age):time`, and `s(sleep_z):time`. For `s(sleep_z):time`, roughly, if we cannot fit a straight line through the confidence bands, there is evidence that the effect of time depends on sleep duration. It is correct that the confidence interval is zero at one point along the axis; this happens because we do not include the main effect.



### Controlling for socioeconomic status

**Full data** Below is the model output. The term `s(sleep_z):time` is probably what we care most about.

```
##
## Family: gaussian
## Link function: identity
##
## Formula:
## value ~ sex + site + income_scaled + education_scaled + icv +
##       s(bl_age, k = 10, bs = "cr") + s(bl_age, by = sleep_z, bs = "cr") +
##       +s(bl_age, by = time, k = 5, bs = "cr") + s(sleep_z, by = time,
##       k = 5, bs = "cr", pc = 0)
```

```

## <environment: 0x563911595d20>
##
## Parametric coefficients:
##           Estimate Std. Error t value Pr(>|t|)
## (Intercept)   37660.0    2151.5  17.504 < 2e-16 ***
## sexmale       2900.2     566.1   5.123 3.13e-07 ***
## siteousAvanto -10760.5    2260.7  -4.760 2.00e-06 ***
## siteousPrisma -15399.4    2778.2  -5.543 3.14e-08 ***
## siteousSkyra  -6998.7    2223.0  -3.148 0.00165 **
## siteUKB       -10198.7    2063.0  -4.944 7.94e-07 ***
## income_scaled -1400.6     775.7  -1.806 0.07105 .
## education_scaled 2117.1     856.4   2.472 0.01347 *
## icv           4895.2     230.1  21.273 < 2e-16 ***
## ---
## Signif. codes:  0 '***' 0.001 '**' 0.01 '*' 0.05 '.' 0.1 ' ' 1
##
## Approximate significance of smooth terms:
##           edf Ref.df      F p-value
## s(bl_age)      4.006  4.006 137.442 <2e-16 ***
## s(bl_age):sleep_z 2.000  2.000   0.126  0.882
## s(bl_age):time  4.521  4.521 908.512 <2e-16 ***
## s(sleep_z):time  1.000  1.000   0.077  0.781
## ---
## Signif. codes:  0 '***' 0.001 '**' 0.01 '*' 0.05 '.' 0.1 ' ' 1
##
## R-sq.(adj) =  0.392
## lmer.REML = 91653  Scale est. = 1.6932e+06  n = 4650

```

Below are plots of a plot of `s(bl_age)`, `s(bl_age):sleep_z`, `s(bl_age):time`, and `s(sleep_z):time`. For `s(sleep_z):time`, roughly, if we cannot fit a straight line through the confidence bands, there is evidence that the effect of time depends on sleep duration. It is correct that the confidence interval is zero at one point along the axis; this happens because we do not include the main effect.

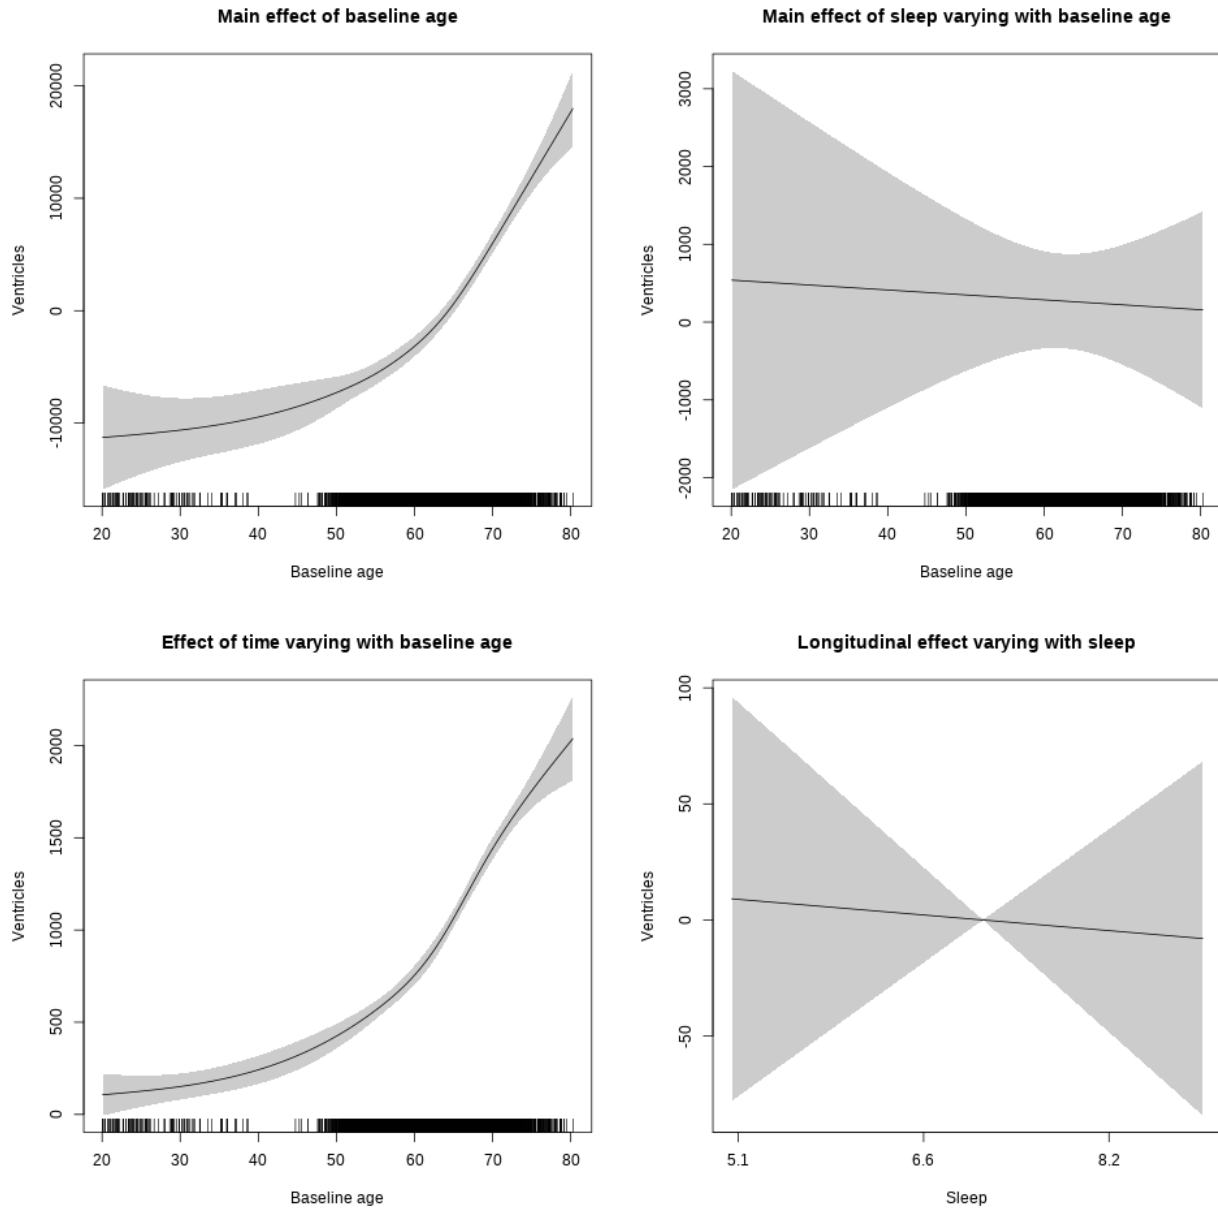

**Restricted to sleep  $\geq 5$  and  $\leq 9$  hours** Below is the row for `s(sleep_z):time` from the model output.

```
## s(sleep_z):time 1.000 1.000 0.044 0.834
```

Below are plots of a plot of `s(bl_age)`, `s(bl_age):sleep_z`, `s(bl_age):time`, and `s(sleep_z):time`. For `s(sleep_z):time`, roughly, if we cannot fit a straight line through the confidence bands, there is evidence that the effect of time depends on sleep duration. It is correct that the confidence interval is zero at one point along the axis; this happens because we do not include the main effect.



## Controlling for BMI

**Full data** Below is the model output. The term `s(sleep_z):time` is probably what we care most about.

```
##
## Family: gaussian
## Link function: identity
##
## Formula:
## value ~ sex + site + bmi + icv + s(bl_age, k = 10, bs = "cr") +
##   s(bl_age, by = sleep_z, bs = "cr") + s(bl_age, by = time,
##     k = 5, bs = "cr") + s(sleep_z, by = time, k = 5, bs = "cr",
##     pc = 0)
```

```

## <environment: 0x563916ce02c0>
##
## Parametric coefficients:
##           Estimate Std. Error t value Pr(>|t|)
## (Intercept) 26395.94   1875.38  14.075 < 2e-16 ***
## sexmale      2792.68    533.99   5.230 1.76e-07 ***
## siteousPrisma -1374.82  1101.48  -1.248 0.21203
## siteousSkyra  3693.64    367.30  10.056 < 2e-16 ***
## siteUCAM      178.37   1346.88   0.132 0.89465
## siteUKB      -2210.57  1218.09  -1.815 0.06961 .
## siteUmU      1905.16   1576.79   1.208 0.22700
## bmi          158.03    58.71   2.691 0.00714 **
## icv          5013.14   221.89  22.593 < 2e-16 ***
## ---
## Signif. codes:  0 '***' 0.001 '**' 0.01 '*' 0.05 '.' 0.1 ' ' 1
##
## Approximate significance of smooth terms:
##           edf Ref.df      F p-value
## s(bl_age)      4.735  4.735 187.008 <2e-16 ***
## s(bl_age):sleep_z 2.000  2.000   0.537   0.585
## s(bl_age):time  4.588  4.588 973.972 <2e-16 ***
## s(sleep_z):time 1.000  1.000   1.842   0.175
## ---
## Signif. codes:  0 '***' 0.001 '**' 0.01 '*' 0.05 '.' 0.1 ' ' 1
##
## R-sq.(adj) = 0.405
## lmer.REML = 1.0689e+05 Scale est. = 1.7767e+06 n = 5409

```

Below are plots of a plot of  $s(\text{bl\_age})$ ,  $s(\text{bl\_age}):\text{sleep\_z}$ ,  $s(\text{bl\_age}):\text{time}$ , and  $s(\text{sleep\_z}):\text{time}$ . For  $s(\text{sleep\_z}):\text{time}$ , roughly, if we cannot fit a straight line through the confidence bands, there is evidence that the effect of time depends on sleep duration. It is correct that the confidence interval is zero at one point along the axis; this happens because we do not include the main effect.

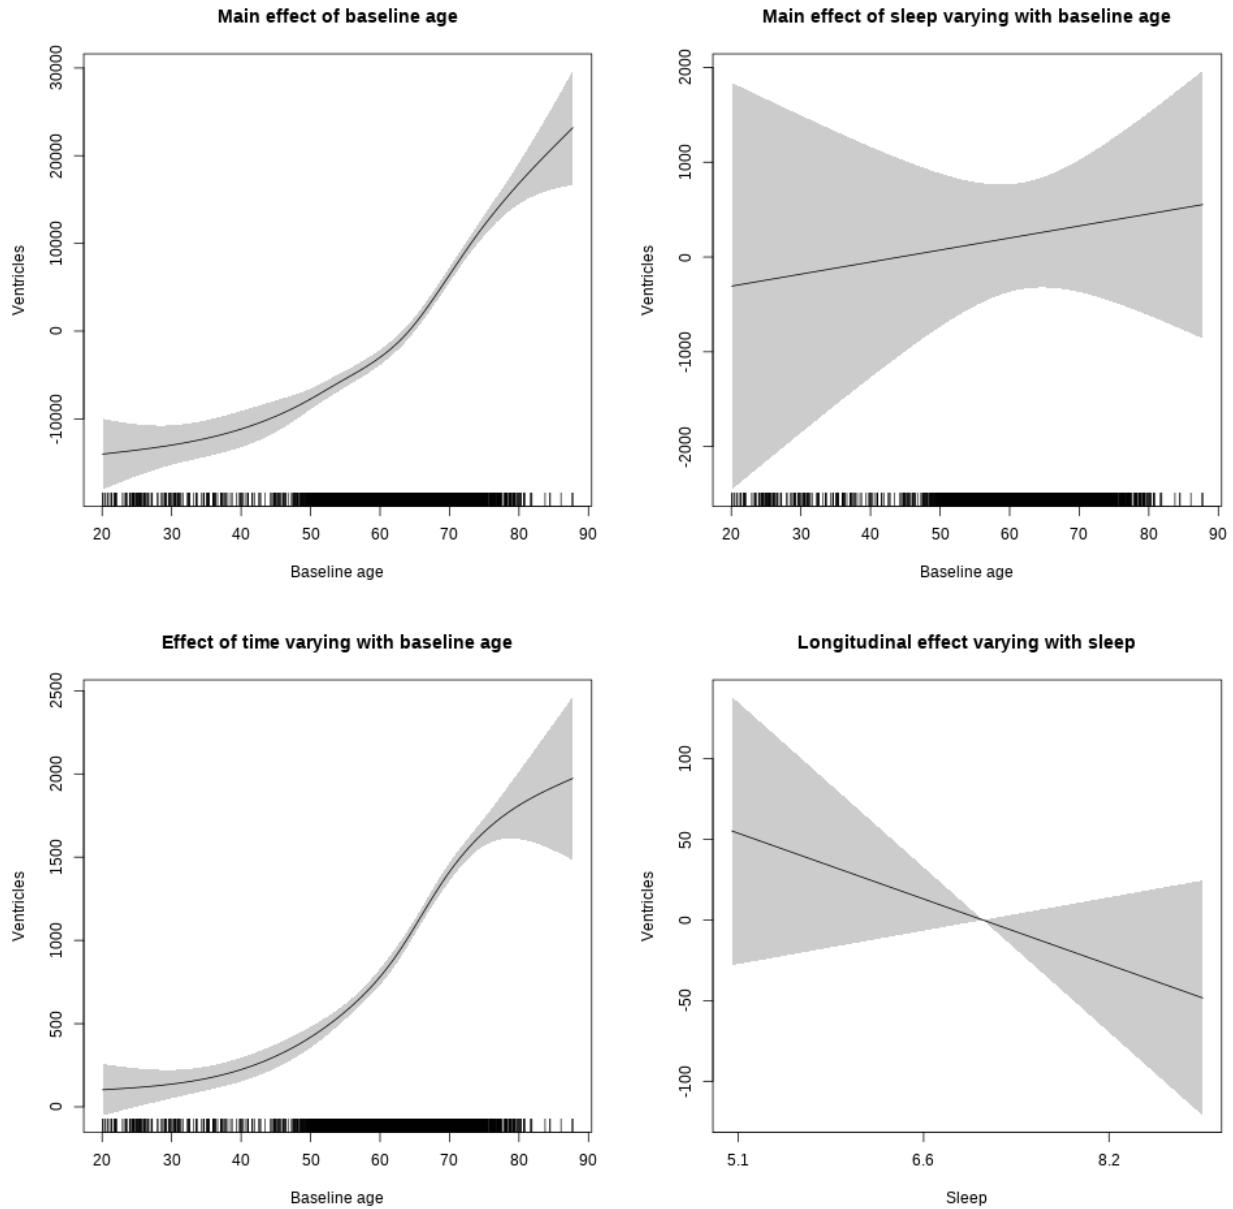

**Restricted to sleep  $\geq 5$  and  $\leq 9$  hours** Below is the row for `s(sleep_z):time` from the model output.

```
## s(sleep_z):time 1.000 1.000 1.759 0.185
```

Below are plots of a plot of `s(bl_age)`, `s(bl_age):sleep_z`, `s(bl_age):time`, and `s(sleep_z):time`. For `s(sleep_z):time`, roughly, if we cannot fit a straight line through the confidence bands, there is evidence that the effect of time depends on sleep duration. It is correct that the confidence interval is zero at one point along the axis; this happens because we do not include the main effect.





## Controlling for depression

**Full data** Below is the model output. The term `s(sleep_z):time` is probably what we care most about.

```
##
## Family: gaussian
## Link function: identity
##
## Formula:
## value ~ sex + site + depression + icv + s(bl_age, k = 10, bs = "cr") +
##       s(bl_age, by = sleep_z, bs = "cr") + +s(bl_age, by = time,
##       k = 5, bs = "cr") + s(sleep_z, by = time, k = 5, bs = "cr",
##       pc = 0)
```

```

## <environment: 0x563910fa56f0>
##
## Parametric coefficients:
##           Estimate Std. Error t value Pr(>|t|)
## (Intercept)  38524.3    1020.9  37.734 < 2e-16 ***
## sexmale      2348.2     529.2   4.438 9.27e-06 ***
## siteousAvanto -8998.2    2009.3  -4.478 7.68e-06 ***
## siteousPrisma -8631.2    2385.1  -3.619 0.000299 ***
## siteousSkyra  -5194.1    1944.9  -2.671 0.007592 **
## siteUCAM      -8390.3    1276.8  -6.572 5.42e-11 ***
## siteUKB       -10154.5    956.2  -10.620 < 2e-16 ***
## siteUmU       -9558.2    1567.3  -6.098 1.14e-09 ***
## depression    9042.6    1971.2   4.587 4.59e-06 ***
## icv           5401.5     218.3  24.739 < 2e-16 ***
## ---
## Signif. codes:  0 '***' 0.001 '**' 0.01 '*' 0.05 '.' 0.1 ' ' 1
##
## Approximate significance of smooth terms:
##           edf Ref.df      F p-value
## s(bl_age)      4.465  4.465  183.530 <2e-16 ***
## s(bl_age):sleep_z 2.000  2.000   3.315 0.0364 *
## s(bl_age):time  4.448  4.448 1067.363 <2e-16 ***
## s(sleep_z):time 1.000  1.000   2.211 0.1371
## ---
## Signif. codes:  0 '***' 0.001 '**' 0.01 '*' 0.05 '.' 0.1 ' ' 1
##
## R-sq.(adj) =  0.419
## lmer.REML = 1.1244e+05  Scale est. = 1.8371e+06  n = 5678

```

Below are plots of a plot of `s(bl_age)`, `s(bl_age):sleep_z`, `s(bl_age):time`, and `s(sleep_z):time`. For `s(sleep_z):time`, roughly, if we cannot fit a straight line through the confidence bands, there is evidence that the effect of time depends on sleep duration. It is correct that the confidence interval is zero at one point along the axis; this happens because we do not include the main effect.

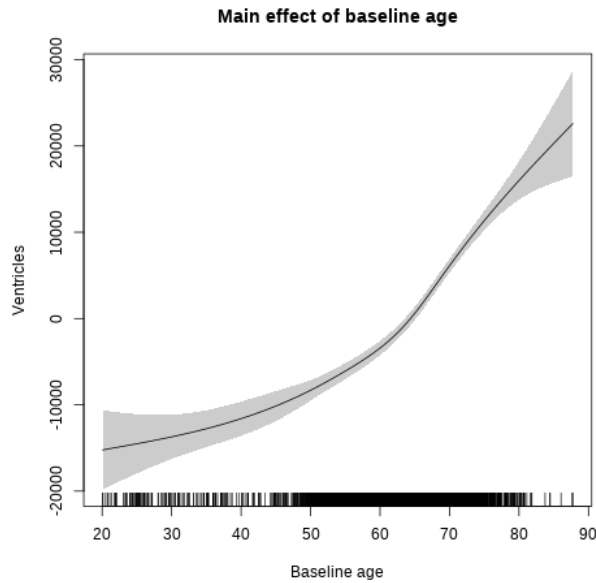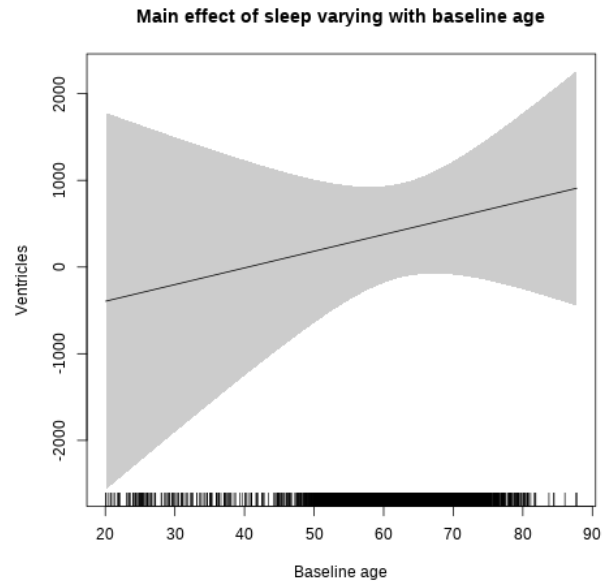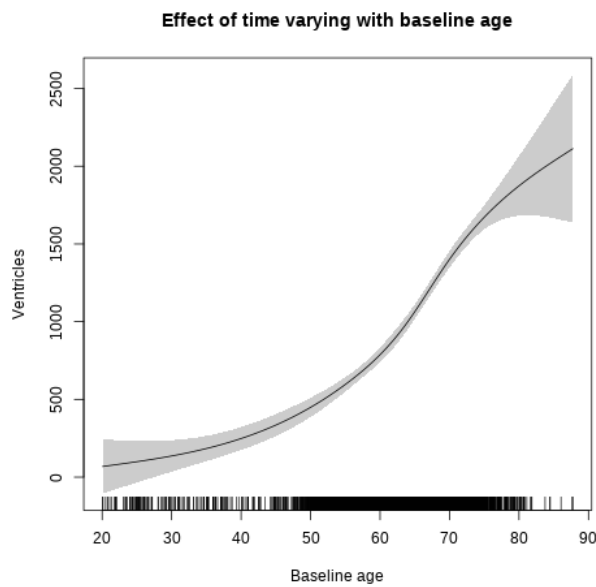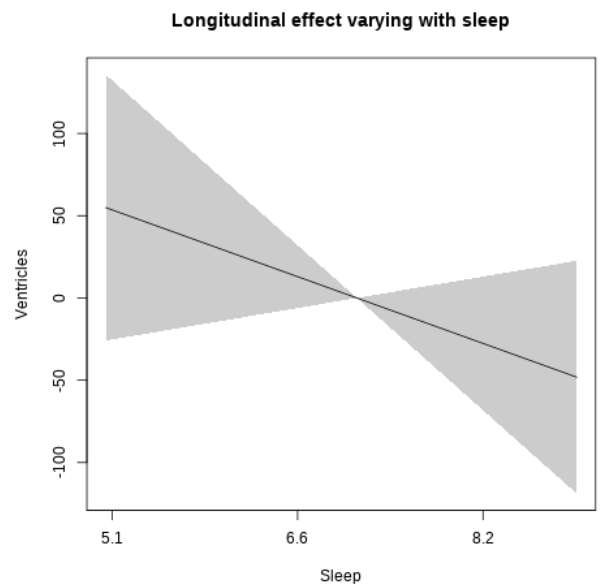

**Restricted to sleep  $\geq 5$  and  $\leq 9$  hours** Below is the row for `s(sleep_z):time` from the model output.

```
## s(sleep_z):time 1.000 1.000 1.850 0.174
```

Below are plots of a plot of `s(bl_age)`, `s(bl_age):sleep_z`, `s(bl_age):time`, and `s(sleep_z):time`. For `s(sleep_z):time`, roughly, if we cannot fit a straight line through the confidence bands, there is evidence that the effect of time depends on sleep duration. It is correct that the confidence interval is zero at one point along the axis; this happens because we do not include the main effect.

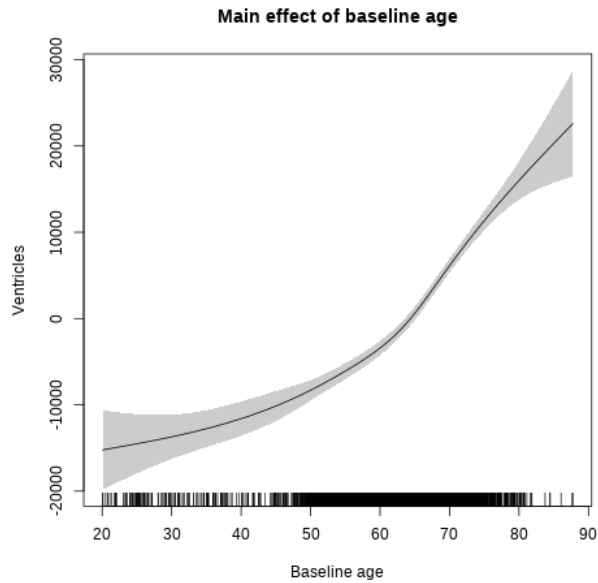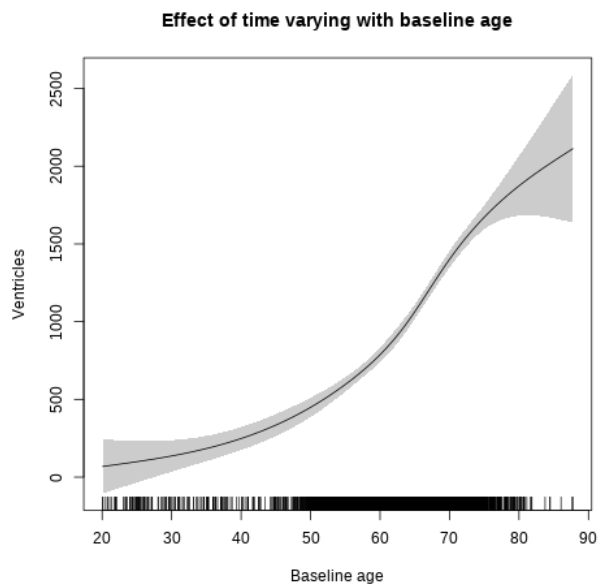

## Controlling for sleep quality

**Full data** Below is the model output. The term `s(sleep_z):time` is probably what we care most about.

```
##
## Family: gaussian
## Link function: identity
##
## Formula:
## value ~ X + s(bl_age, k = 10, bs = "cr") + s(bl_age, by = sleep_z,
##       bs = "cr") + s(bl_age, by = time, k = 5, bs = "cr") + s(sleep_z,
##       by = time, k = 5, bs = "cr", pc = 0)
## <environment: 0x563914d995c8>
```

```

##
## Parametric coefficients:
##           Estimate Std. Error t value Pr(>|t|)
## (Intercept)      28955.47   1695.82  17.075 <2e-16 ***
## Xsexmale          8317.05    633.09  13.137 <2e-16 ***
## XsiteousAvanto     727.83   1618.52   0.450  0.6530
## XsiteousPrisma    1033.03   1994.08   0.518  0.6045
## XsiteousSkyra     2102.25   1619.52   1.298  0.1943
## XsiteUB           -5556.93   2577.96  -2.156  0.0312 *
## XsiteUCAM         -417.92   1669.57  -0.250  0.8024
## XsiteUKB          2040.06   5165.61   0.395  0.6929
## XsiteUmU         -1872.19   1845.78  -1.014  0.3105
## Xukb_dummy:sleep_accel -720.26   397.80  -1.811  0.0703 .
## Xukb_dummy:chronotype -188.99   529.84  -0.357  0.7213
## Xukb_dummy:dozing    573.38  1094.76   0.524  0.6005
## Xukb_dummy:sleeplessness 27.97   683.09   0.041  0.9673
## Xukb_dummy:snoring   250.64   966.33   0.259  0.7954
## Xukb_dummy:gettingup -201.57   743.07  -0.271  0.7862
## Xnotukb_dummy:PSQI_Global -71.70   209.81  -0.342  0.7326
## ---
## Signif. codes:  0 '***' 0.001 '**' 0.01 '*' 0.05 '.' 0.1 ' ' 1
##
## Approximate significance of smooth terms:
##           edf Ref.df      F p-value
## s(bl_age)      4.933  4.933 120.356 < 2e-16 ***
## s(bl_age):sleep_z 2.000  2.000   1.561 0.210086
## s(bl_age):time  4.122  4.122 860.189 < 2e-16 ***
## s(sleep_z):time  1.000  1.000  12.709 0.000368 ***
## ---
## Signif. codes:  0 '***' 0.001 '**' 0.01 '*' 0.05 '.' 0.1 ' ' 1
##
## R-sq.(adj) =  0.334
## lmer.REML = 84735 Scale est. = 2.2708e+06 n = 4275

```

Below are plots of a plot of  $s(\text{bl\_age})$ ,  $s(\text{bl\_age}):\text{sleep\_z}$ ,  $s(\text{bl\_age}):\text{time}$ , and  $s(\text{sleep\_z}):\text{time}$ . For  $s(\text{sleep\_z}):\text{time}$ , roughly, if we cannot fit a straight line through the confidence bands, there is evidence that the effect of time depends on sleep duration. It is correct that the confidence interval is zero at one point along the axis; this happens because we do not include the main effect.

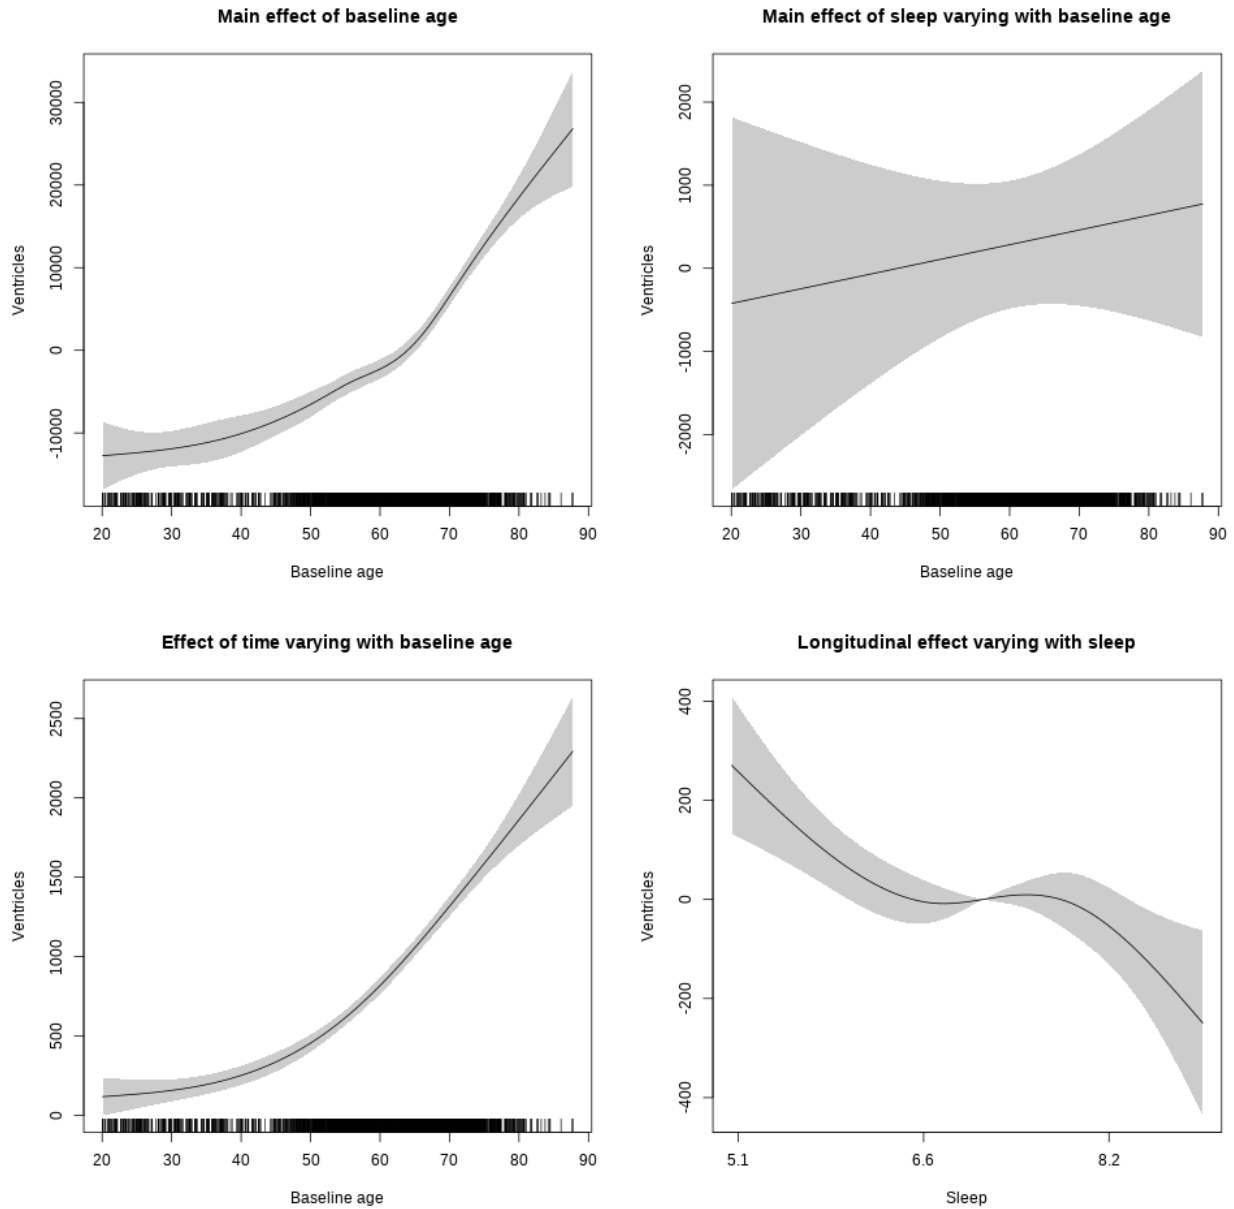

**Restricted to sleep  $\geq 5$  and  $\leq 9$  hours** Below is the row for `s(sleep_z):time` from the model output.

```
## s(sleep_z):time 3.090 3.090 7.705 2.6e-05 ***
```

Below are plots of a plot of `s(bl_age)`, `s(bl_age):sleep_z`, `s(bl_age):time`, and `s(sleep_z):time`. For `s(sleep_z):time`, roughly, if we cannot fit a straight line through the confidence bands, there is evidence that the effect of time depends on sleep duration. It is correct that the confidence interval is zero at one point along the axis; this happens because we do not include the main effect.

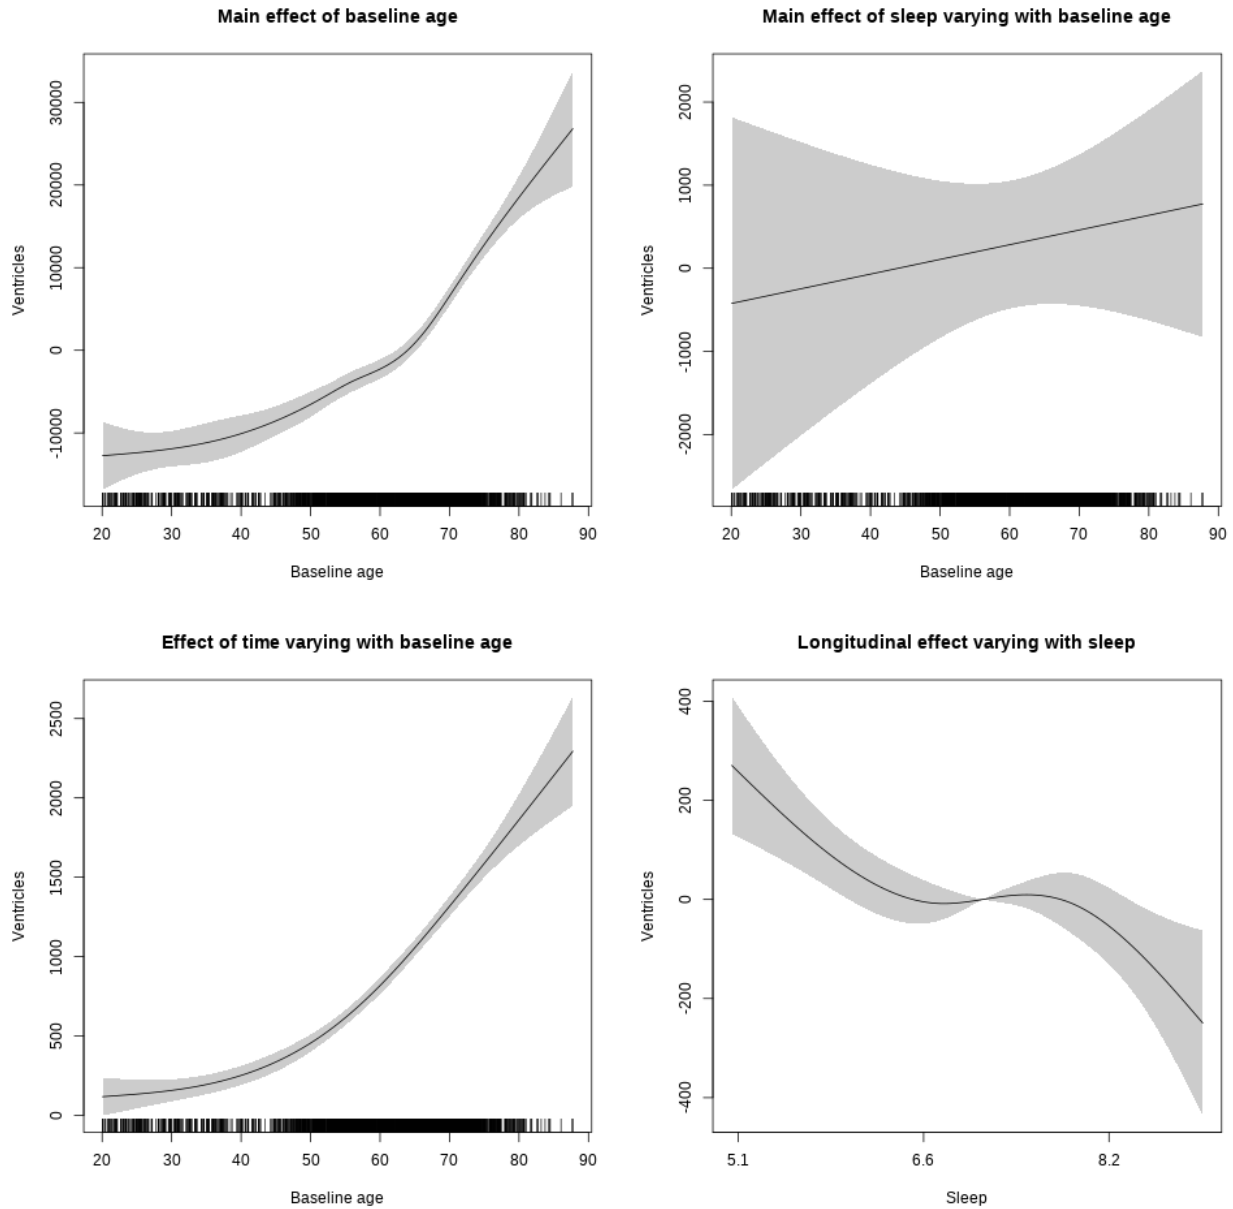

## P-values corrected for multiple testing

Below is a table showing the p-values for `s(sleep_z, by = time)` adjusted for multiple testing using the Benjamini-Hochberg procedure for the main models not controlling for SES, BMI, or depression.

| controlvar | region         | type      | pval   | adjusted_pval |
|------------|----------------|-----------|--------|---------------|
| default    | Accumbens-area | Full data | 0.7914 | 0.8845        |
| default    | Amygdala       | Full data | 0.0416 | 0.1318        |
| default    | Brain-Stem     | Full data | 0.0122 | 0.0514        |
| default    | Caudate        | Full data | 0.0036 | 0.0196        |
| default    | CC_Anterior    | Full data | 0.9246 | 0.9760        |
| default    | CC_Central     | Full data | 0.5245 | 0.7033        |

| controlvar | region                        | type                                            | pval   | adjusted_pval |
|------------|-------------------------------|-------------------------------------------------|--------|---------------|
| default    | CC_Mid_Anterior               | Full data                                       | 0.2362 | 0.4275        |
| default    | CC_Mid_Posterior              | Full data                                       | 0.8680 | 0.9425        |
| default    | CC_Posterior                  | Full data                                       | 0.0990 | 0.2208        |
| default    | Cerebellum-Cortex             | Full data                                       | 0.5299 | 0.7033        |
| default    | Cerebellum-White-Matter       | Full data                                       | 0.0002 | 0.0055        |
| default    | CerebralWhiteMatterVol        | Full data                                       | 0.1046 | 0.2208        |
| default    | EstimatedTotalIntraCranialVol | Full data                                       | 0.5573 | 0.7033        |
| default    | Hippocampus                   | Full data                                       | 0.2322 | 0.4275        |
| default    | Pallidum                      | Full data                                       | 0.0194 | 0.0671        |
| default    | Putamen                       | Full data                                       | 0.3522 | 0.5771        |
| default    | Thalamus                      | Full data                                       | 0.0004 | 0.0055        |
| default    | TotalGrayVol                  | Full data                                       | 0.5737 | 0.7033        |
| default    | Ventricles                    | Full data                                       | 0.0024 | 0.0150        |
| default    | Accumbens-area                | Restricted to sleep $\geq 5$ and $\leq 9$ hours | 0.4554 | 0.6922        |
| default    | Amygdala                      | Restricted to sleep $\geq 5$ and $\leq 9$ hours | 0.0530 | 0.1485        |
| default    | Brain-Stem                    | Restricted to sleep $\geq 5$ and $\leq 9$ hours | 0.0054 | 0.0256        |
| default    | Caudate                       | Restricted to sleep $\geq 5$ and $\leq 9$ hours | 0.0179 | 0.0671        |
| default    | CC_Anterior                   | Restricted to sleep $\geq 5$ and $\leq 9$ hours | 0.9828 | 0.9828        |
| default    | CC_Central                    | Restricted to sleep $\geq 5$ and $\leq 9$ hours | 0.9701 | 0.9828        |
| default    | CC_Mid_Anterior               | Restricted to sleep $\geq 5$ and $\leq 9$ hours | 0.1820 | 0.3640        |
| default    | CC_Mid_Posterior              | Restricted to sleep $\geq 5$ and $\leq 9$ hours | 0.6951 | 0.8004        |
| default    | CC_Posterior                  | Restricted to sleep $\geq 5$ and $\leq 9$ hours | 0.0604 | 0.1485        |
| default    | Cerebellum-Cortex             | Restricted to sleep $\geq 5$ and $\leq 9$ hours | 0.3645 | 0.5771        |
| default    | Cerebellum-White-Matter       | Restricted to sleep $\geq 5$ and $\leq 9$ hours | 0.0004 | 0.0055        |
| default    | CerebralWhiteMatterVol        | Restricted to sleep $\geq 5$ and $\leq 9$ hours | 0.0605 | 0.1485        |
| default    | EstimatedTotalIntraCranialVol | Restricted to sleep $\geq 5$ and $\leq 9$ hours | 0.3036 | 0.5244        |
| default    | Hippocampus                   | Restricted to sleep $\geq 5$ and $\leq 9$ hours | 0.6076 | 0.7215        |
| default    | Pallidum                      | Restricted to sleep $\geq 5$ and $\leq 9$ hours | 0.0625 | 0.1485        |
| default    | Putamen                       | Restricted to sleep $\geq 5$ and $\leq 9$ hours | 0.5006 | 0.7033        |
| default    | Thalamus                      | Restricted to sleep $\geq 5$ and $\leq 9$ hours | 0.0014 | 0.0132        |
| default    | TotalGrayVol                  | Restricted to sleep $\geq 5$ and $\leq 9$ hours | 0.5718 | 0.7033        |
| default    | Ventricles                    | Restricted to sleep $\geq 5$ and $\leq 9$ hours | 0.0022 | 0.0150        |



## Controlling for quality

Below is a plot comparing the p-values for `s(sleep_z, by = time)` adjusted for multiple testing using the Benjamini-Hochberg procedure for the the model controlling for sleep quality and the default model.

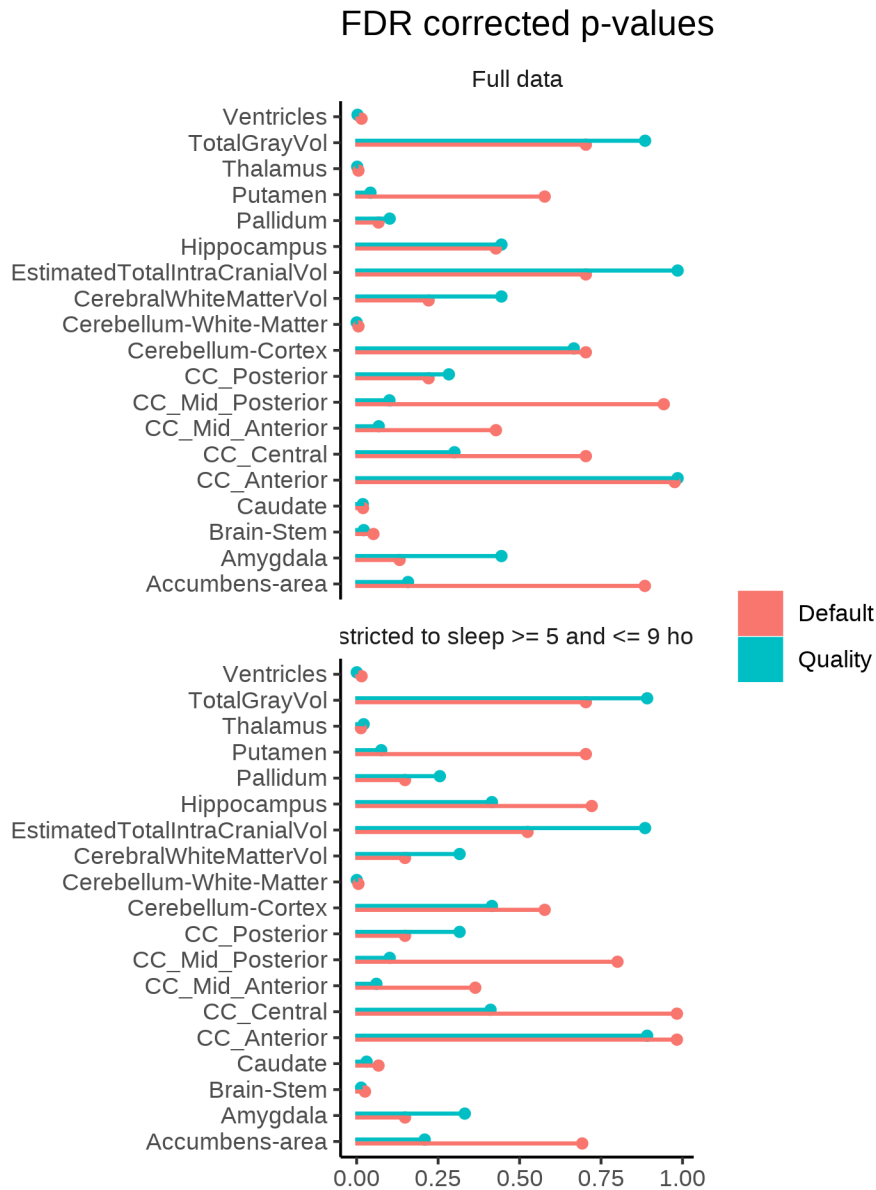

Next is a table of all the p-values for this model controlling for sleep quality.

| region          | type      | pval   | adjusted_pval |
|-----------------|-----------|--------|---------------|
| Accumbens-area  | Full data | 0.0747 | 0.1577        |
| Amygdala        | Full data | 0.3619 | 0.4444        |
| Brain-Stem      | Full data | 0.0051 | 0.0217        |
| Caudate         | Full data | 0.0035 | 0.0189        |
| CC_Anterior     | Full data | 0.9799 | 0.9850        |
| CC_Central      | Full data | 0.1738 | 0.3002        |
| CC_Mid_Anterior | Full data | 0.0232 | 0.0678        |

| region                        | type                                            | pval   | adjusted_pval |
|-------------------------------|-------------------------------------------------|--------|---------------|
| CC_Mid_Posterior              | Full data                                       | 0.0397 | 0.1005        |
| CC_Posterior                  | Full data                                       | 0.1563 | 0.2829        |
| Cerebellum-Cortex             | Full data                                       | 0.5612 | 0.6664        |
| Cerebellum-White-Matter       | Full data                                       | 0.0000 | 0.0000        |
| CerebralWhiteMatterVol        | Full data                                       | 0.3408 | 0.4444        |
| EstimatedTotalIntraCranialVol | Full data                                       | 0.9850 | 0.9850        |
| Hippocampus                   | Full data                                       | 0.3625 | 0.4444        |
| Pallidum                      | Full data                                       | 0.0452 | 0.1014        |
| Putamen                       | Full data                                       | 0.0123 | 0.0424        |
| Thalamus                      | Full data                                       | 0.0002 | 0.0017        |
| TotalGrayVol                  | Full data                                       | 0.7920 | 0.8851        |
| Ventricles                    | Full data                                       | 0.0004 | 0.0028        |
| Accumbens-area                | Restricted to sleep $\geq 5$ and $\leq 9$ hours | 0.1044 | 0.2088        |
| Amygdala                      | Restricted to sleep $\geq 5$ and $\leq 9$ hours | 0.2183 | 0.3318        |
| Brain-Stem                    | Restricted to sleep $\geq 5$ and $\leq 9$ hours | 0.0022 | 0.0137        |
| Caudate                       | Restricted to sleep $\geq 5$ and $\leq 9$ hours | 0.0080 | 0.0305        |
| CC_Anterior                   | Restricted to sleep $\geq 5$ and $\leq 9$ hours | 0.8402 | 0.8915        |
| CC_Central                    | Restricted to sleep $\geq 5$ and $\leq 9$ hours | 0.2812 | 0.4109        |
| CC_Mid_Anterior               | Restricted to sleep $\geq 5$ and $\leq 9$ hours | 0.0191 | 0.0606        |
| CC_Mid_Posterior              | Restricted to sleep $\geq 5$ and $\leq 9$ hours | 0.0454 | 0.1014        |
| CC_Posterior                  | Restricted to sleep $\geq 5$ and $\leq 9$ hours | 0.1942 | 0.3159        |
| Cerebellum-Cortex             | Restricted to sleep $\geq 5$ and $\leq 9$ hours | 0.2950 | 0.4150        |
| Cerebellum-White-Matter       | Restricted to sleep $\geq 5$ and $\leq 9$ hours | 0.0000 | 0.0003        |
| CerebralWhiteMatterVol        | Restricted to sleep $\geq 5$ and $\leq 9$ hours | 0.1995 | 0.3159        |
| EstimatedTotalIntraCranialVol | Restricted to sleep $\geq 5$ and $\leq 9$ hours | 0.7783 | 0.8851        |
| Hippocampus                   | Restricted to sleep $\geq 5$ and $\leq 9$ hours | 0.3058 | 0.4150        |
| Pallidum                      | Restricted to sleep $\geq 5$ and $\leq 9$ hours | 0.1344 | 0.2553        |
| Putamen                       | Restricted to sleep $\geq 5$ and $\leq 9$ hours | 0.0278 | 0.0755        |
| Thalamus                      | Restricted to sleep $\geq 5$ and $\leq 9$ hours | 0.0045 | 0.0214        |
| TotalGrayVol                  | Restricted to sleep $\geq 5$ and $\leq 9$ hours | 0.8446 | 0.8915        |
| Ventricles                    | Restricted to sleep $\geq 5$ and $\leq 9$ hours | 0.0000 | 0.0003        |

## P-values controlling for BMI

| region                        | type      | pval   | adjusted_pval |
|-------------------------------|-----------|--------|---------------|
| Accumbens-area                | Full data | 0.2710 | 0.5169        |
| Amygdala                      | Full data | 0.0035 | 0.0254        |
| Brain-Stem                    | Full data | 0.2992 | 0.5169        |
| Caudate                       | Full data | 0.0013 | 0.0166        |
| CC_Anterior                   | Full data | 0.6934 | 0.8341        |
| CC_Central                    | Full data | 0.2973 | 0.5169        |
| CC_Mid_Anterior               | Full data | 0.2958 | 0.5169        |
| CC_Mid_Posterior              | Full data | 0.6361 | 0.8341        |
| CC_Posterior                  | Full data | 0.1222 | 0.4204        |
| Cerebellum-Cortex             | Full data | 0.8936 | 0.9108        |
| Cerebellum-White-Matter       | Full data | 0.0004 | 0.0143        |
| CerebralWhiteMatterVol        | Full data | 0.6206 | 0.8341        |
| EstimatedTotalIntraCranialVol | Full data | 0.5942 | 0.8341        |
| Hippocampus                   | Full data | 0.2834 | 0.5169        |
| Pallidum                      | Full data | 0.0158 | 0.0750        |

| region                        | type                                            | pval   | adjusted_pval |
|-------------------------------|-------------------------------------------------|--------|---------------|
| Putamen                       | Full data                                       | 0.9108 | 0.9108        |
| Thalamus                      | Full data                                       | 0.0028 | 0.0254        |
| TotalGrayVol                  | Full data                                       | 0.1461 | 0.4204        |
| Ventricles                    | Full data                                       | 0.1747 | 0.4388        |
| Accumbens-area                | Restricted to sleep $\geq 5$ and $\leq 9$ hours | 0.4891 | 0.7435        |
| Amygdala                      | Restricted to sleep $\geq 5$ and $\leq 9$ hours | 0.0040 | 0.0254        |
| Brain-Stem                    | Restricted to sleep $\geq 5$ and $\leq 9$ hours | 0.1338 | 0.4204        |
| Caudate                       | Restricted to sleep $\geq 5$ and $\leq 9$ hours | 0.0013 | 0.0166        |
| CC_Anterior                   | Restricted to sleep $\geq 5$ and $\leq 9$ hours | 0.6704 | 0.8341        |
| CC_Central                    | Restricted to sleep $\geq 5$ and $\leq 9$ hours | 0.6384 | 0.8341        |
| CC_Mid_Anterior               | Restricted to sleep $\geq 5$ and $\leq 9$ hours | 0.3937 | 0.6233        |
| CC_Mid_Posterior              | Restricted to sleep $\geq 5$ and $\leq 9$ hours | 0.7024 | 0.8341        |
| CC_Posterior                  | Restricted to sleep $\geq 5$ and $\leq 9$ hours | 0.1549 | 0.4204        |
| Cerebellum-Cortex             | Restricted to sleep $\geq 5$ and $\leq 9$ hours | 0.2856 | 0.5169        |
| Cerebellum-White-Matter       | Restricted to sleep $\geq 5$ and $\leq 9$ hours | 0.0086 | 0.0468        |
| CerebralWhiteMatterVol        | Restricted to sleep $\geq 5$ and $\leq 9$ hours | 0.3666 | 0.6057        |
| EstimatedTotalIntraCranialVol | Restricted to sleep $\geq 5$ and $\leq 9$ hours | 0.8084 | 0.8777        |
| Hippocampus                   | Restricted to sleep $\geq 5$ and $\leq 9$ hours | 0.7366 | 0.8419        |
| Pallidum                      | Restricted to sleep $\geq 5$ and $\leq 9$ hours | 0.0833 | 0.3165        |
| Putamen                       | Restricted to sleep $\geq 5$ and $\leq 9$ hours | 0.7533 | 0.8419        |
| Thalamus                      | Restricted to sleep $\geq 5$ and $\leq 9$ hours | 0.0230 | 0.0969        |
| TotalGrayVol                  | Restricted to sleep $\geq 5$ and $\leq 9$ hours | 0.8528 | 0.9002        |
| Ventricles                    | Restricted to sleep $\geq 5$ and $\leq 9$ hours | 0.1848 | 0.4388        |

## P-values controlling for SES

| region                        | type                                            | pval   | adjusted_pval |
|-------------------------------|-------------------------------------------------|--------|---------------|
| Accumbens-area                | Full data                                       | 0.0986 | 0.5908        |
| Amygdala                      | Full data                                       | 0.1039 | 0.5908        |
| Brain-Stem                    | Full data                                       | 0.1334 | 0.6335        |
| Caudate                       | Full data                                       | 0.3185 | 0.6562        |
| CC_Anterior                   | Full data                                       | 0.5049 | 0.6885        |
| CC_Central                    | Full data                                       | 0.8780 | 0.9018        |
| CC_Mid_Anterior               | Full data                                       | 0.8340 | 0.9018        |
| CC_Mid_Posterior              | Full data                                       | 0.2508 | 0.6562        |
| CC_Posterior                  | Full data                                       | 0.4001 | 0.6562        |
| Cerebellum-Cortex             | Full data                                       | 0.9947 | 0.9947        |
| Cerebellum-White-Matter       | Full data                                       | 0.3558 | 0.6562        |
| CerebralWhiteMatterVol        | Full data                                       | 0.2209 | 0.6562        |
| EstimatedTotalIntraCranialVol | Full data                                       | 0.3876 | 0.6562        |
| Hippocampus                   | Full data                                       | 0.1515 | 0.6397        |
| Pallidum                      | Full data                                       | 0.0176 | 0.5908        |
| Putamen                       | Full data                                       | 0.4490 | 0.6562        |
| Thalamus                      | Full data                                       | 0.0702 | 0.5908        |
| TotalGrayVol                  | Full data                                       | 0.1088 | 0.5908        |
| Ventricles                    | Full data                                       | 0.7810 | 0.8993        |
| Accumbens-area                | Restricted to sleep $\geq 5$ and $\leq 9$ hours | 0.3712 | 0.6562        |
| Amygdala                      | Restricted to sleep $\geq 5$ and $\leq 9$ hours | 0.0932 | 0.5908        |
| Brain-Stem                    | Restricted to sleep $\geq 5$ and $\leq 9$ hours | 0.3915 | 0.6562        |
| Caudate                       | Restricted to sleep $\geq 5$ and $\leq 9$ hours | 0.3660 | 0.6562        |

| region                        | type                                            | pval   | adjusted_pval |
|-------------------------------|-------------------------------------------------|--------|---------------|
| CC_Anterior                   | Restricted to sleep $\geq 5$ and $\leq 9$ hours | 0.4422 | 0.6562        |
| CC_Central                    | Restricted to sleep $\geq 5$ and $\leq 9$ hours | 0.6923 | 0.8476        |
| CC_Mid_Anterior               | Restricted to sleep $\geq 5$ and $\leq 9$ hours | 0.7064 | 0.8476        |
| CC_Mid_Posterior              | Restricted to sleep $\geq 5$ and $\leq 9$ hours | 0.3153 | 0.6562        |
| CC_Posterior                  | Restricted to sleep $\geq 5$ and $\leq 9$ hours | 0.4395 | 0.6562        |
| Cerebellum-Cortex             | Restricted to sleep $\geq 5$ and $\leq 9$ hours | 0.4110 | 0.6562        |
| Cerebellum-White-Matter       | Restricted to sleep $\geq 5$ and $\leq 9$ hours | 0.3810 | 0.6562        |
| CerebralWhiteMatterVol        | Restricted to sleep $\geq 5$ and $\leq 9$ hours | 0.7137 | 0.8476        |
| EstimatedTotalIntraCranialVol | Restricted to sleep $\geq 5$ and $\leq 9$ hours | 0.5073 | 0.6885        |
| Hippocampus                   | Restricted to sleep $\geq 5$ and $\leq 9$ hours | 0.6452 | 0.8454        |
| Pallidum                      | Restricted to sleep $\geq 5$ and $\leq 9$ hours | 0.0677 | 0.5908        |
| Putamen                       | Restricted to sleep $\geq 5$ and $\leq 9$ hours | 0.3340 | 0.6562        |
| Thalamus                      | Restricted to sleep $\geq 5$ and $\leq 9$ hours | 0.2561 | 0.6562        |
| TotalGrayVol                  | Restricted to sleep $\geq 5$ and $\leq 9$ hours | 0.8550 | 0.9018        |
| Ventricles                    | Restricted to sleep $\geq 5$ and $\leq 9$ hours | 0.8340 | 0.9018        |

## P-values controlling for Depression

| region                        | type                                            | pval   | adjusted_pval |
|-------------------------------|-------------------------------------------------|--------|---------------|
| Accumbens-area                | Full data                                       | 0.1468 | 0.4534        |
| Amygdala                      | Full data                                       | 0.0504 | 0.2394        |
| Brain-Stem                    | Full data                                       | 0.1416 | 0.4534        |
| Caudate                       | Full data                                       | 0.0000 | 0.0007        |
| CC_Anterior                   | Full data                                       | 0.8319 | 0.8781        |
| CC_Central                    | Full data                                       | 0.4567 | 0.6675        |
| CC_Mid_Anterior               | Full data                                       | 0.3933 | 0.5979        |
| CC_Mid_Posterior              | Full data                                       | 0.5472 | 0.7426        |
| CC_Posterior                  | Full data                                       | 0.2621 | 0.4643        |
| Cerebellum-Cortex             | Full data                                       | 0.9059 | 0.9304        |
| Cerebellum-White-Matter       | Full data                                       | 0.0031 | 0.0391        |
| CerebralWhiteMatterVol        | Full data                                       | 0.6399 | 0.7598        |
| EstimatedTotalIntraCranialVol | Full data                                       | 0.7866 | 0.8541        |
| Hippocampus                   | Full data                                       | 0.1822 | 0.4534        |
| Pallidum                      | Full data                                       | 0.0382 | 0.2072        |
| Putamen                       | Full data                                       | 0.2216 | 0.4607        |
| Thalamus                      | Full data                                       | 0.0319 | 0.2021        |
| TotalGrayVol                  | Full data                                       | 0.2111 | 0.4607        |
| Ventricles                    | Full data                                       | 0.1371 | 0.4534        |
| Accumbens-area                | Restricted to sleep $\geq 5$ and $\leq 9$ hours | 0.2425 | 0.4607        |
| Amygdala                      | Restricted to sleep $\geq 5$ and $\leq 9$ hours | 0.0206 | 0.1800        |
| Brain-Stem                    | Restricted to sleep $\geq 5$ and $\leq 9$ hours | 0.1232 | 0.4534        |
| Caudate                       | Restricted to sleep $\geq 5$ and $\leq 9$ hours | 0.0002 | 0.0037        |
| CC_Anterior                   | Restricted to sleep $\geq 5$ and $\leq 9$ hours | 0.6866 | 0.7674        |
| CC_Central                    | Restricted to sleep $\geq 5$ and $\leq 9$ hours | 0.6148 | 0.7536        |
| CC_Mid_Anterior               | Restricted to sleep $\geq 5$ and $\leq 9$ hours | 0.3409 | 0.5398        |
| CC_Mid_Posterior              | Restricted to sleep $\geq 5$ and $\leq 9$ hours | 0.2351 | 0.4607        |
| CC_Posterior                  | Restricted to sleep $\geq 5$ and $\leq 9$ hours | 0.1678 | 0.4534        |
| Cerebellum-Cortex             | Restricted to sleep $\geq 5$ and $\leq 9$ hours | 0.6028 | 0.7536        |
| Cerebellum-White-Matter       | Restricted to sleep $\geq 5$ and $\leq 9$ hours | 0.0237 | 0.1800        |
| CerebralWhiteMatterVol        | Restricted to sleep $\geq 5$ and $\leq 9$ hours | 0.2919 | 0.4823        |

| region                        | type                                            | pval   | adjusted_pval |
|-------------------------------|-------------------------------------------------|--------|---------------|
| EstimatedTotalIntraCranialVol | Restricted to sleep $\geq 5$ and $\leq 9$ hours | 0.9776 | 0.9776        |
| Hippocampus                   | Restricted to sleep $\geq 5$ and $\leq 9$ hours | 0.6660 | 0.7669        |
| Pallidum                      | Restricted to sleep $\geq 5$ and $\leq 9$ hours | 0.1909 | 0.4534        |
| Putamen                       | Restricted to sleep $\geq 5$ and $\leq 9$ hours | 0.5049 | 0.7107        |
| Thalamus                      | Restricted to sleep $\geq 5$ and $\leq 9$ hours | 0.2688 | 0.4643        |
| TotalGrayVol                  | Restricted to sleep $\geq 5$ and $\leq 9$ hours | 0.6096 | 0.7536        |
| Ventricles                    | Restricted to sleep $\geq 5$ and $\leq 9$ hours | 0.1739 | 0.4534        |

# Clustering of cortical regions

## Contents

|                                     |           |
|-------------------------------------|-----------|
| <b>Area</b>                         | <b>8</b>  |
| Description of clusters . . . . .   | 8         |
| GAMM fits in each cluster . . . . . | 11        |
| Meta analysis . . . . .             | 12        |
| <b>Thickness</b>                    | <b>13</b> |
| Description of clusters . . . . .   | 13        |
| GAMM fits in each cluster . . . . . | 16        |
| Meta analysis . . . . .             | 17        |
| <b>Volume</b>                       | <b>18</b> |
| Description of clusters . . . . .   | 18        |
| GAMM fits in each cluster . . . . . | 21        |
| Meta analysis . . . . .             | 22        |
| <b>References</b>                   | <b>23</b> |

Data preparation, including outlier removal, was done exactly as for the subcortical volumes, and won't be repeated here. Analyses were conducted in R version 4.0.0 (R Core Team 2020). The `tidyverse` (Wickham et al. 2019) was used for data manipulation and visualization, and `ggseg` (Mowinckel and Vidal-Piñeiro 2020) was used for plotting of brain regions. The `metgam` package was used for meta analysis of GAMM fits, using the methods described in Sørensen et al. (2021).

For each measure (area, thickness, volume), the following GAMMs was fitted to each of 33 cortical ROIs, using `gamm4` (Wood and Scheipl 2020). When the measure was thickness, the term `icv` was not included.

```
mod <- gamm4(
  value ~ sex + site + icv + s(age, k = 10, bs = "cr") + s(sleep, k = 5, bs = "cr"),
  random = ~(1|id), data = dat,
  REML = FALSE,
  knots = list(age_z = age_knots, sleep_z = sleep_knots)
)
```

The additional arguments `age_knots` and `sleep_knots` are knot locations which make sure that the basis functions used are identical for all regions. This allows us to perform functional cluster using only the estimated spline coefficients.

The plots below show raw p-values and p-values corrected for multiple testing with the Benjamini-Hochberg procedure, for the effect of sleep and the given measure. The estimated false discovery rate is written in the plot titles. The `sgof` package (Conde and Una Alvarez 2020) was used for this.

area, FDR=0.009

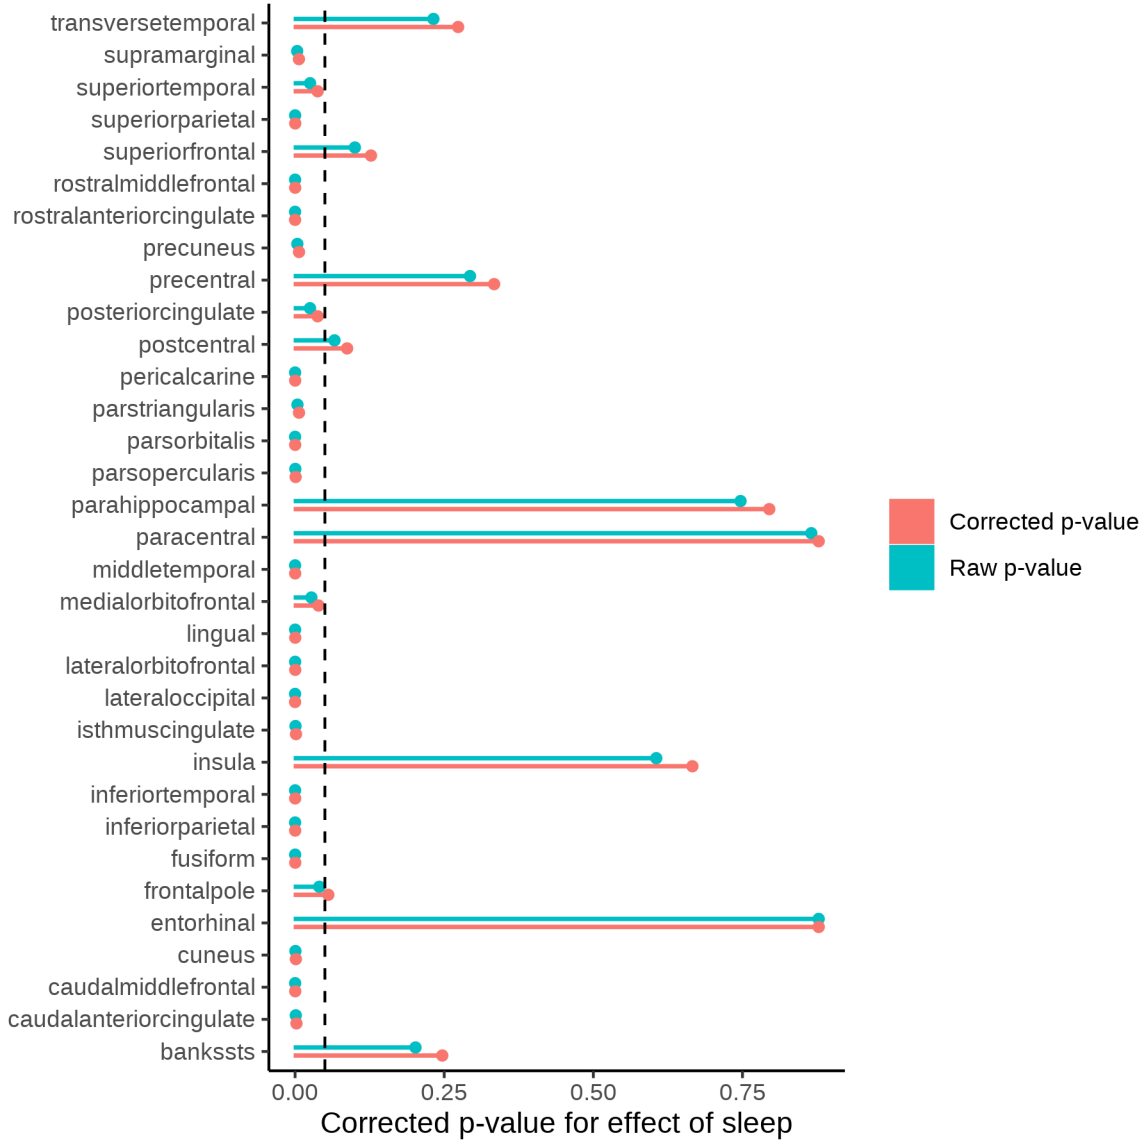

### Stratified analyses, area, FDR=0.009

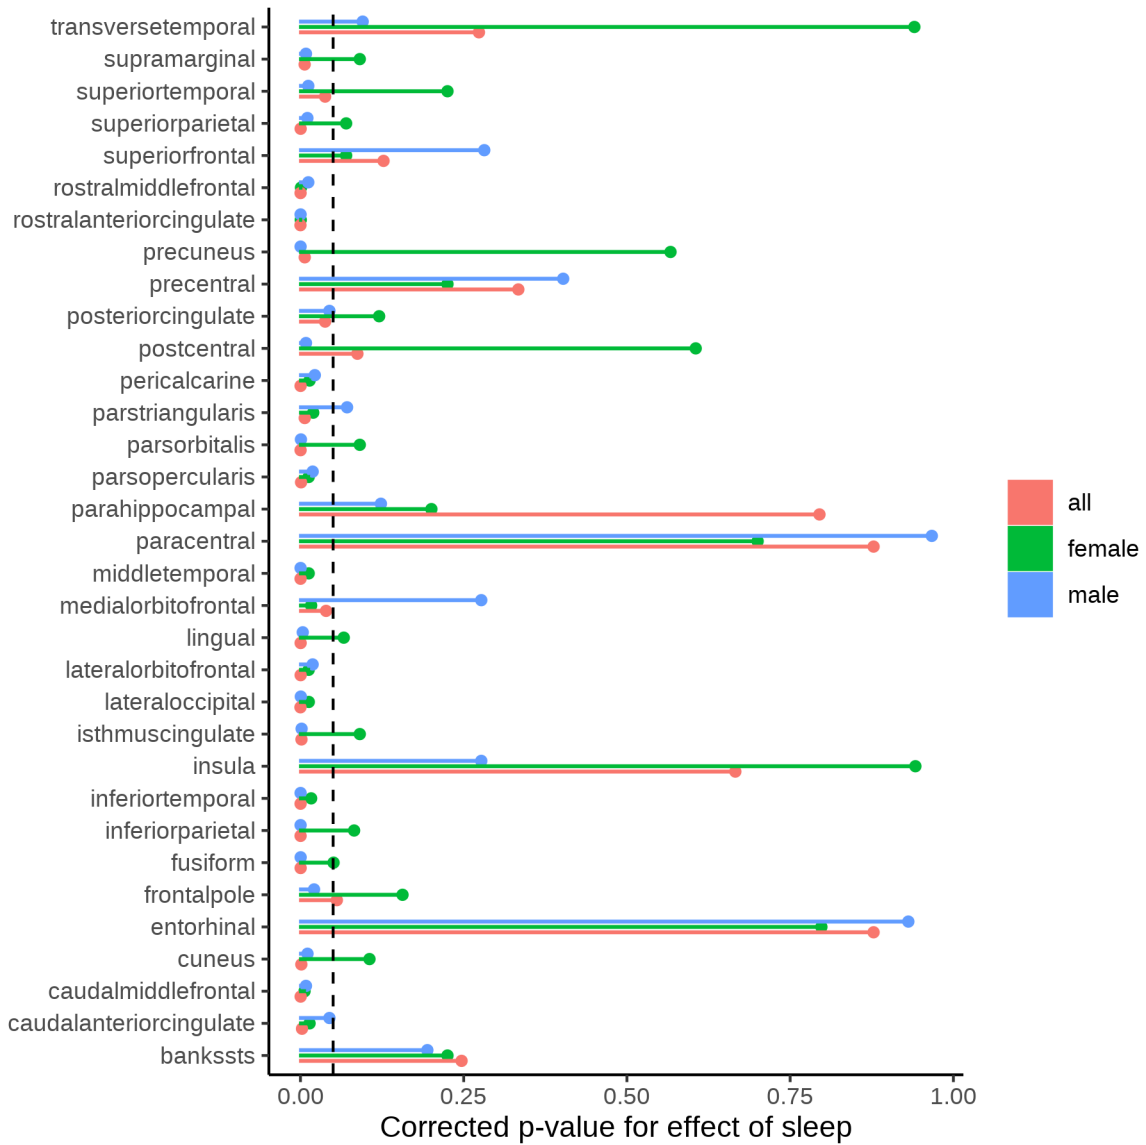



thickness, FDR=0.0041

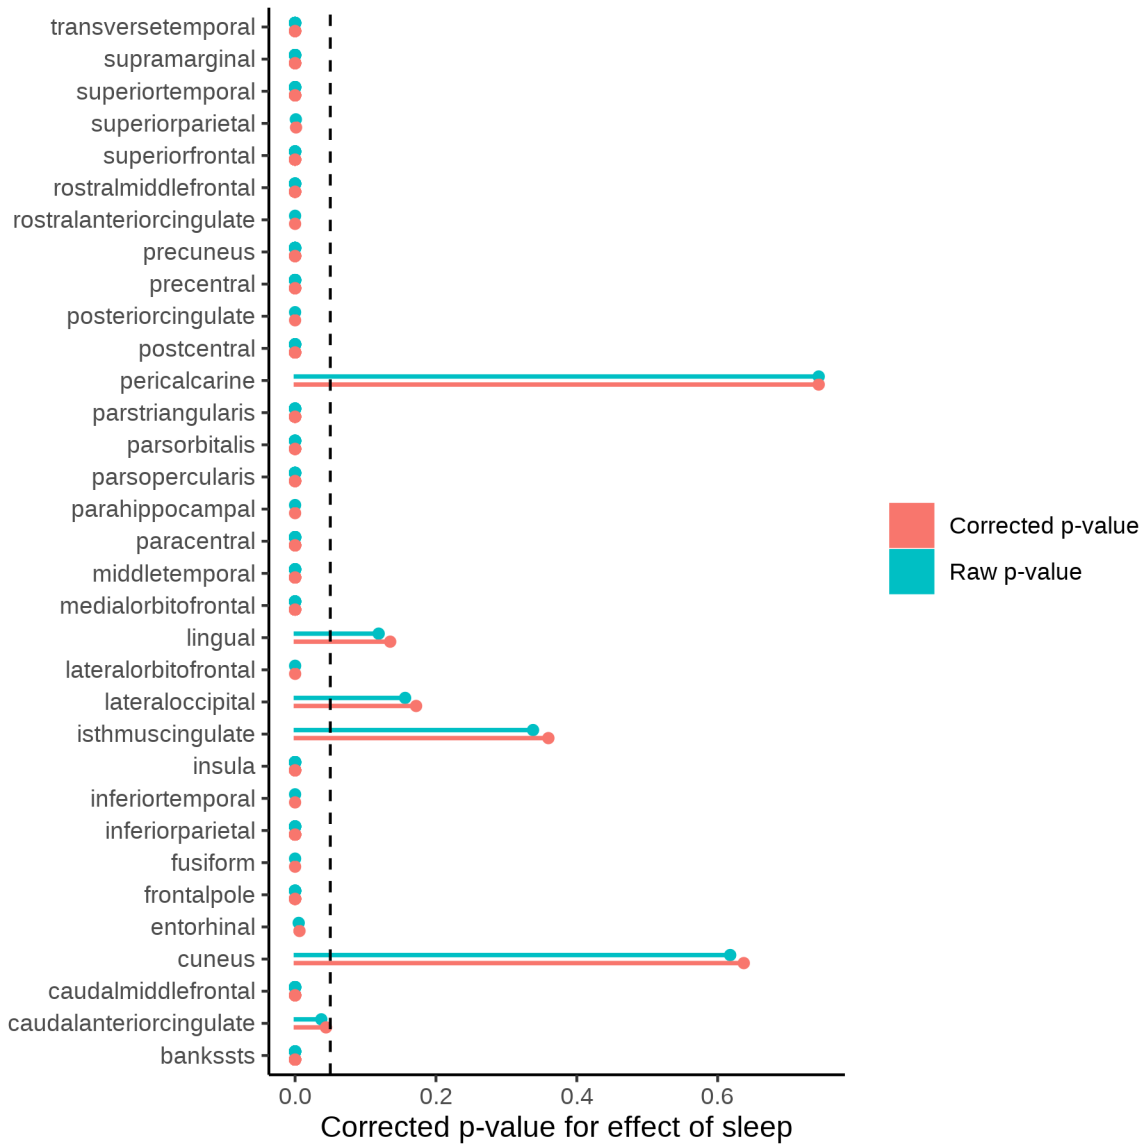

### Stratified analyses, thickness, FDR=0.0041

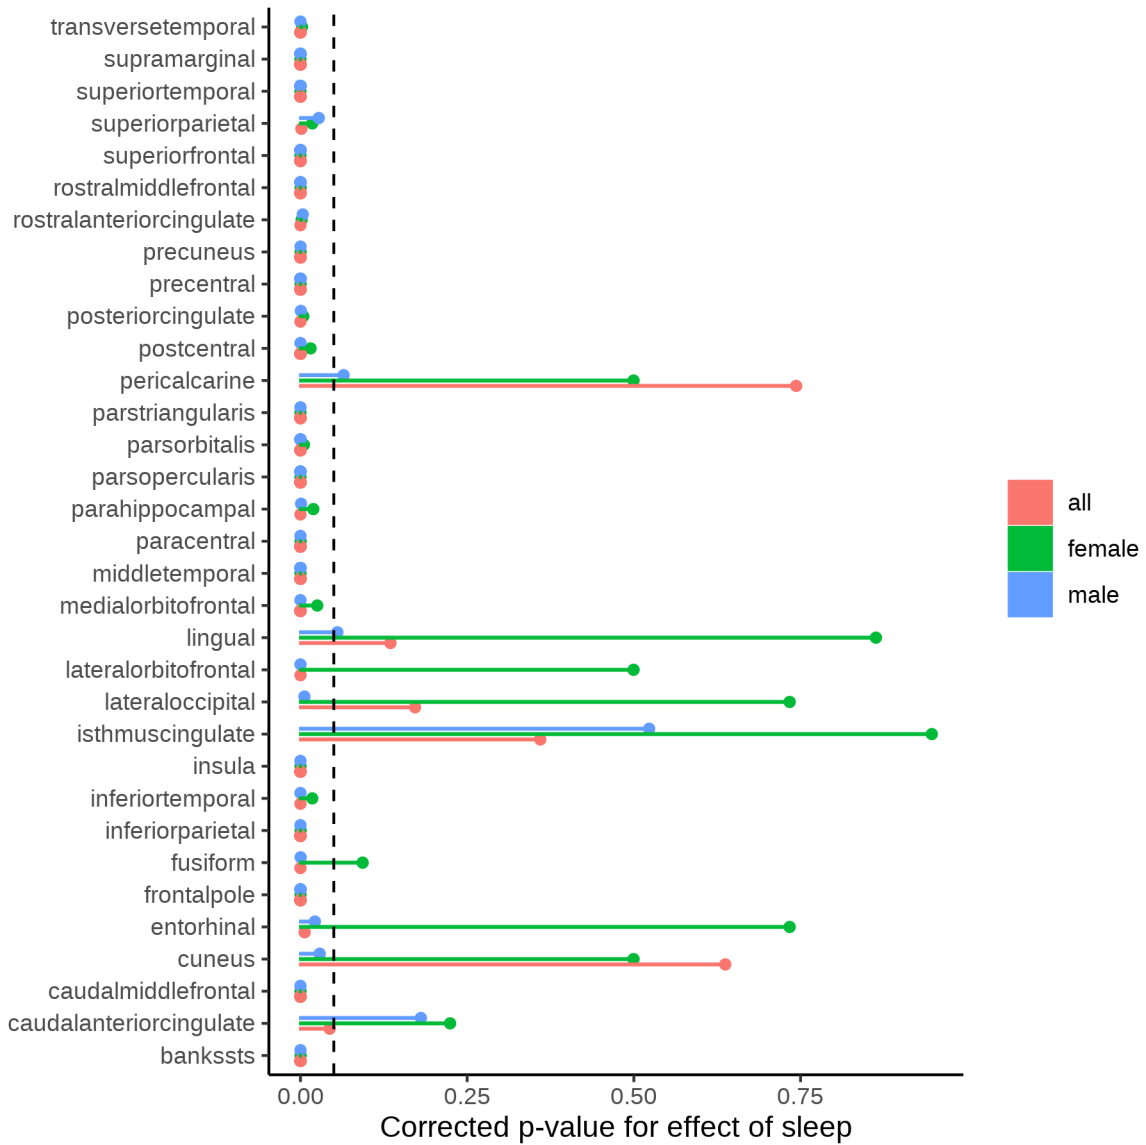

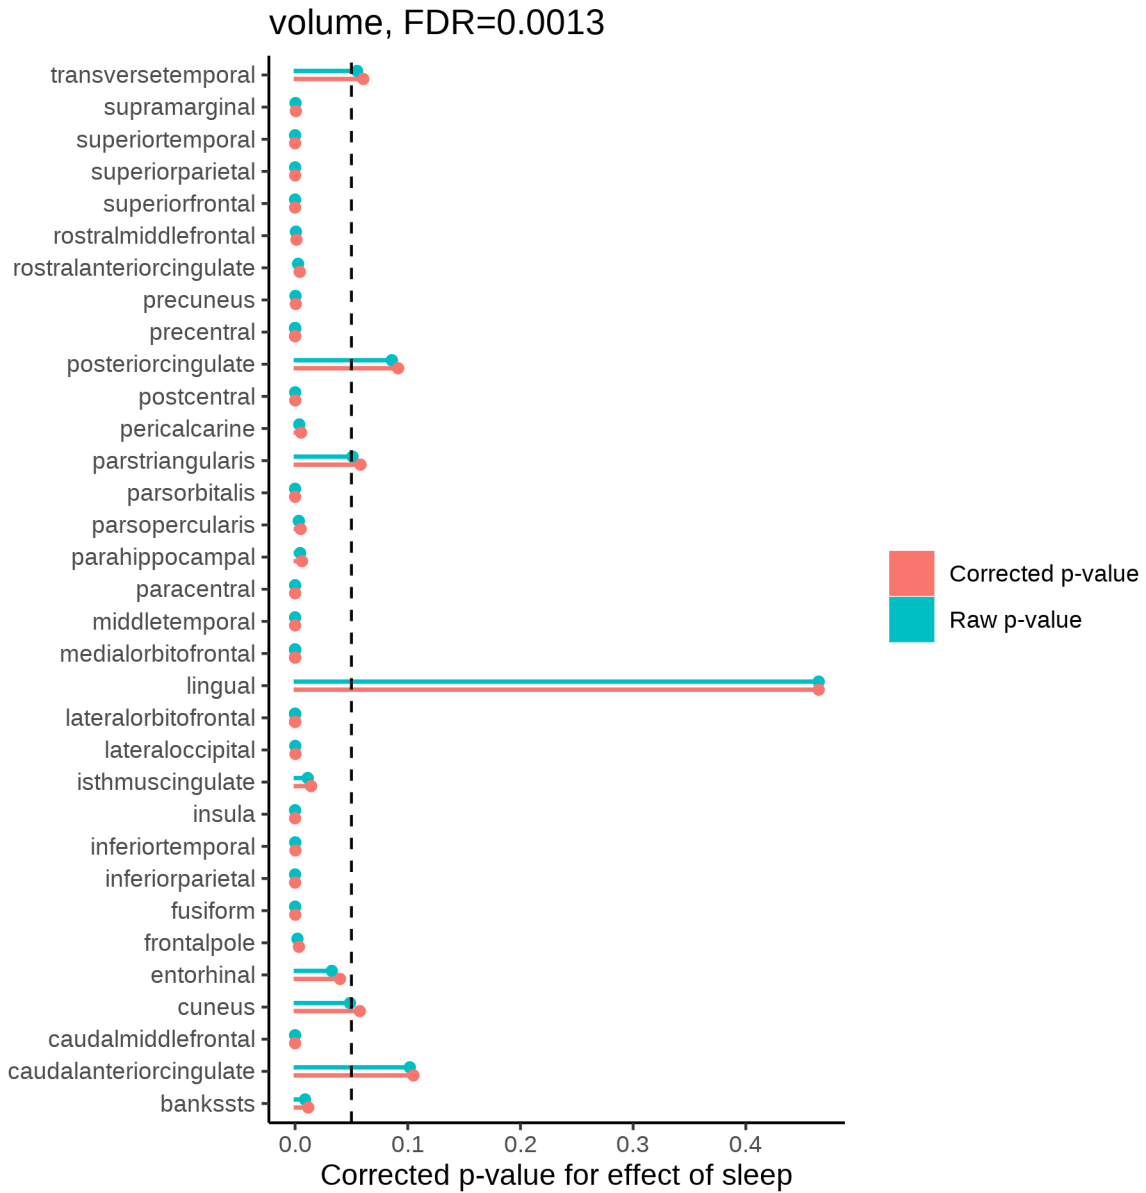

### Stratified analyses, volume, FDR=0.0013

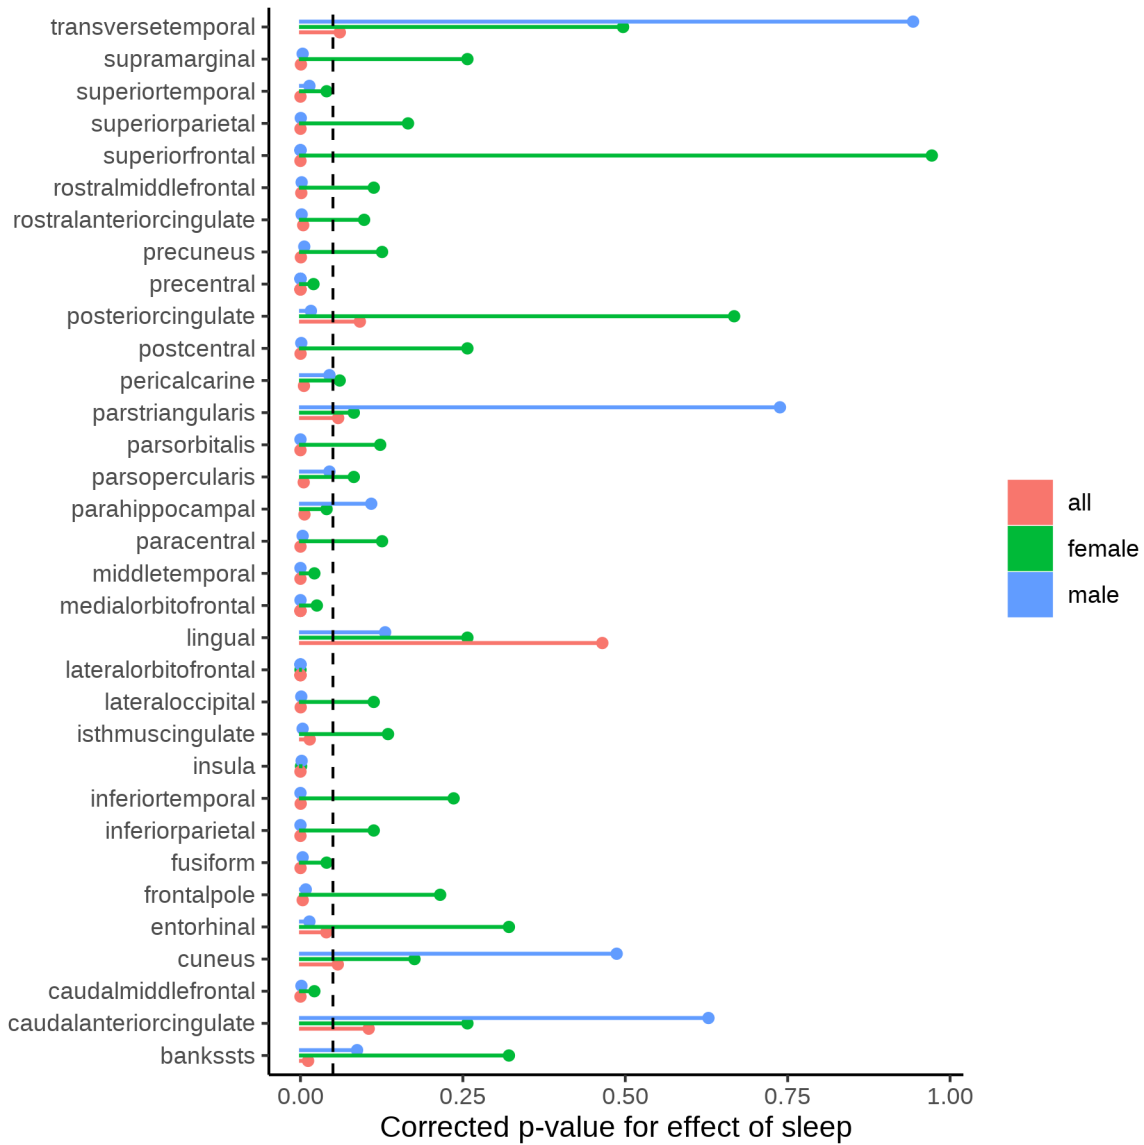

K-means clustering was run for each measure separately, dividing the regions based on the similarity of the sleep-brain curves described by the term  $s(\text{age})$ . The plots below show how the total within-cluster sum-of-squares depends on the number of clusters. As usual, the plots are not very conclusive, but three clusters were chosen for each measure.

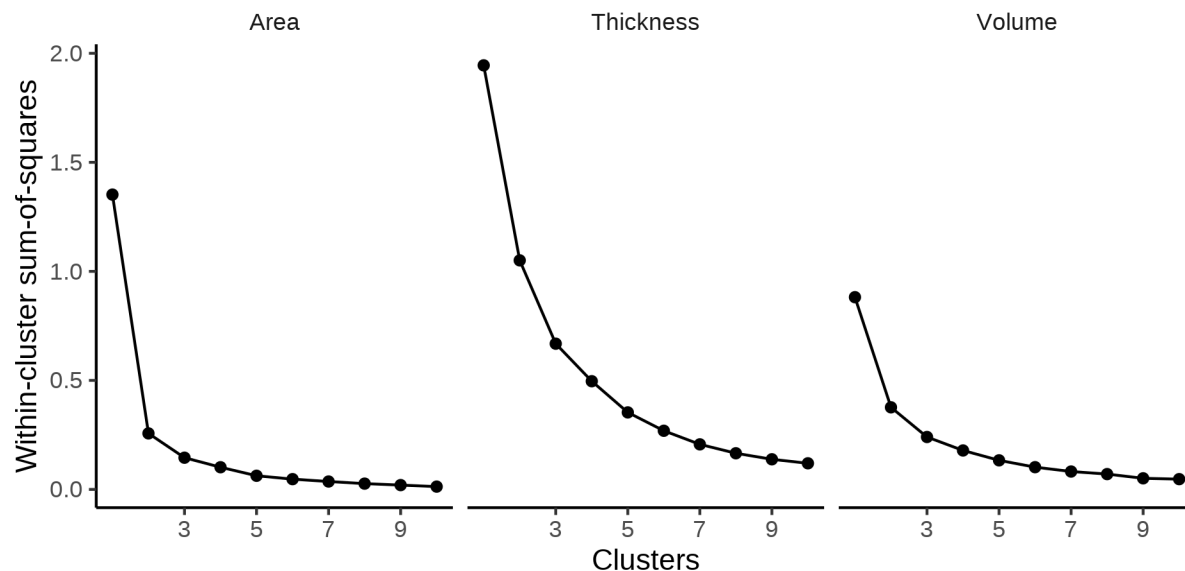

## Area

The following regions go in each cluster:

- Cluster 1: cuneus, inferiorparietal, lateraloccipital, lingual, pericalcarine, superiorparietal
- Cluster 2: caudalmiddlefrontal, lateralorbitofrontal, middletemporal, parsorbitalis
- Cluster 3: bankssts, caudalanteriorcingulate, entorhinal, frontalpole, fusiform, inferiortemporal, insula, isthmuscingulate, medialorbitofrontal, paracentral, parahippocampal, parsopercularis, parstriangularis, postcentral, posteriorcingulate, precentral, precuneus, rostralanteriorcingulate, rostralmiddlefrontal, superiorfrontal, superiortemporal, supramarginal, transversetemporal

## Description of clusters

First are spaghetti plots for the three clusters.

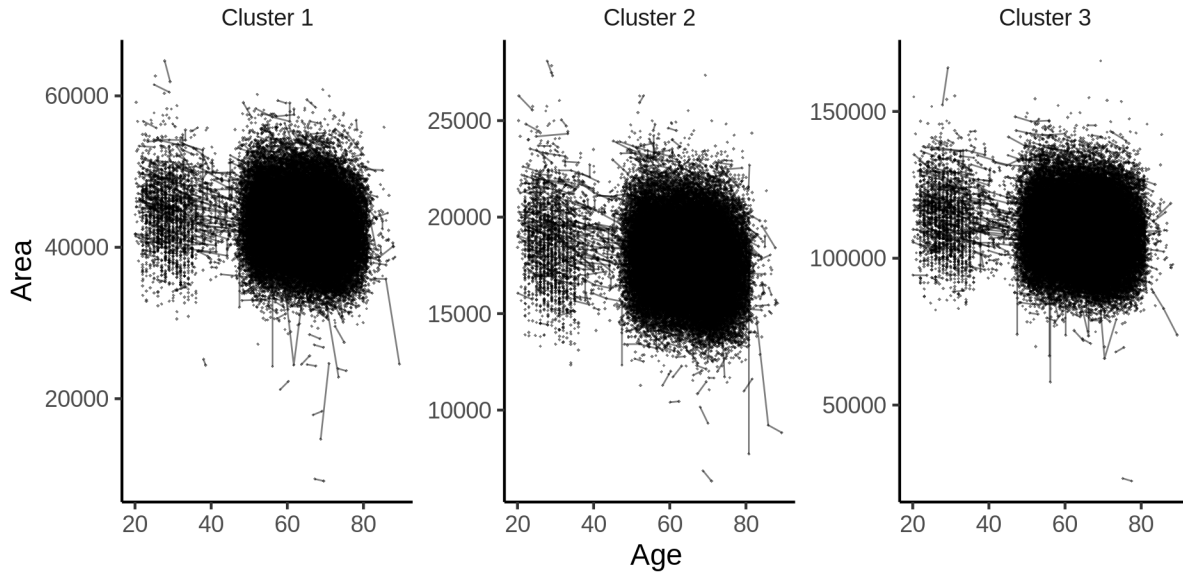

The plot below shows the sleep-volume curves for the three clusters.

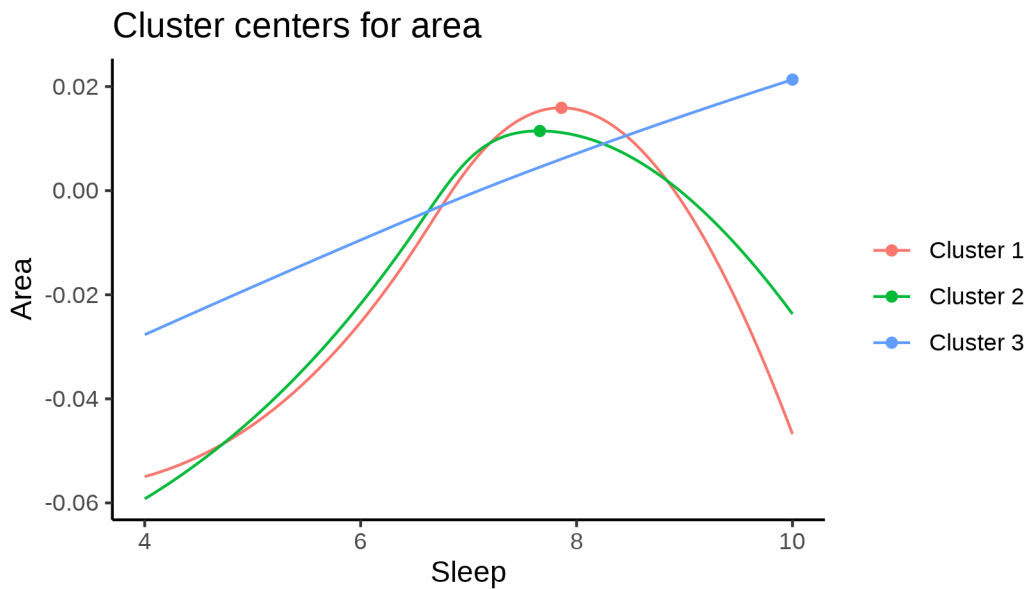

The maximum values for each cluster occur at the following sleep durations:

| Cluster   | Sleep |
|-----------|-------|
| Cluster 1 | 7.86  |
| Cluster 2 | 7.66  |
| Cluster 3 | 10.00 |

The next plot shows the effect of varying the sleep duration as a percentage of the maximum value, obtained at the top of the curve. We have to scrutinize these percentages a bit, because actually defining the mean and standard deviations for each cluster turned out to be not that straightforward, but I believe that what I did makes sense. The problem is that the original clustering is done on a Z-transformed scale, since we are interested in differences in shapes of the curves, and not differences in absolute values of area/thickness/volume

between the regions. Then I had to define conversion factors by weighting the mean and variances of each region in each cluster, and try to scale it back.

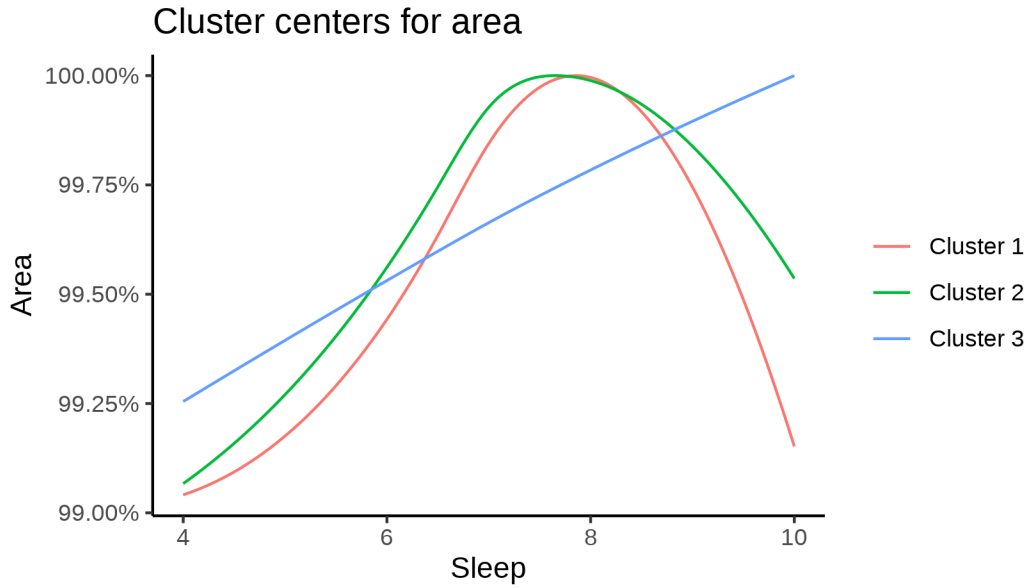

For completeness, we also show the cluster curves upon which the percentage plot above was based. Note that the values differ between clusters, since their sizes are different.

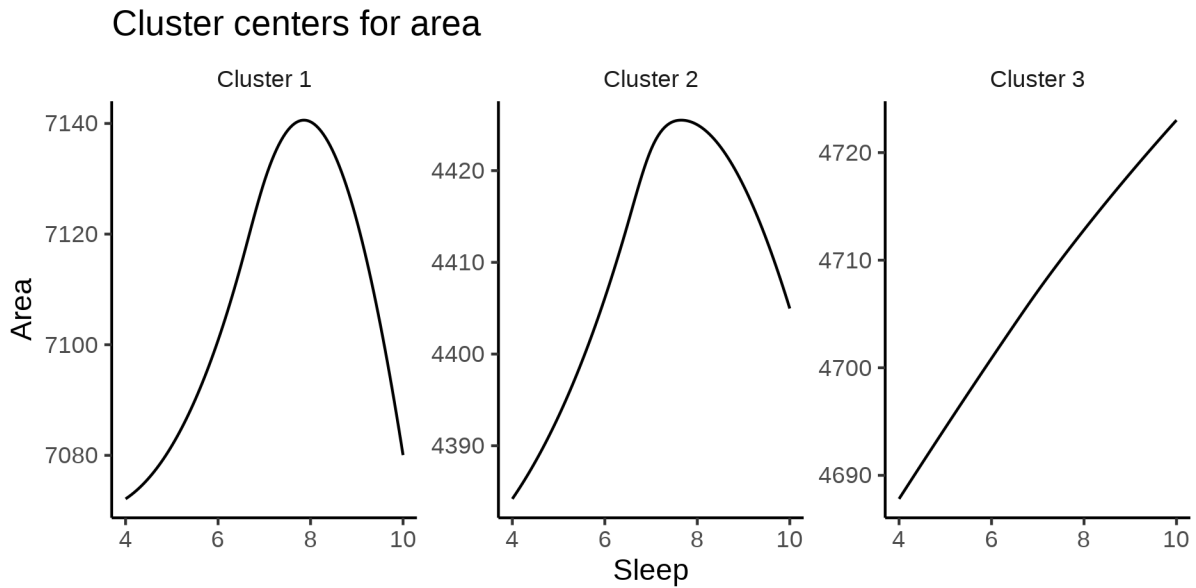

The next plot shows the location of the clusters.

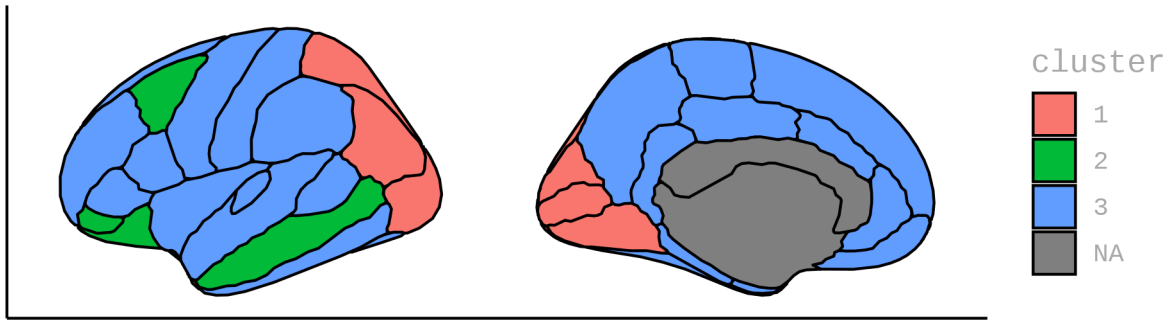

### GAMM fits in each cluster

The plot below shows the results of fitting GAMMs to the (weighted) average in each cluster.

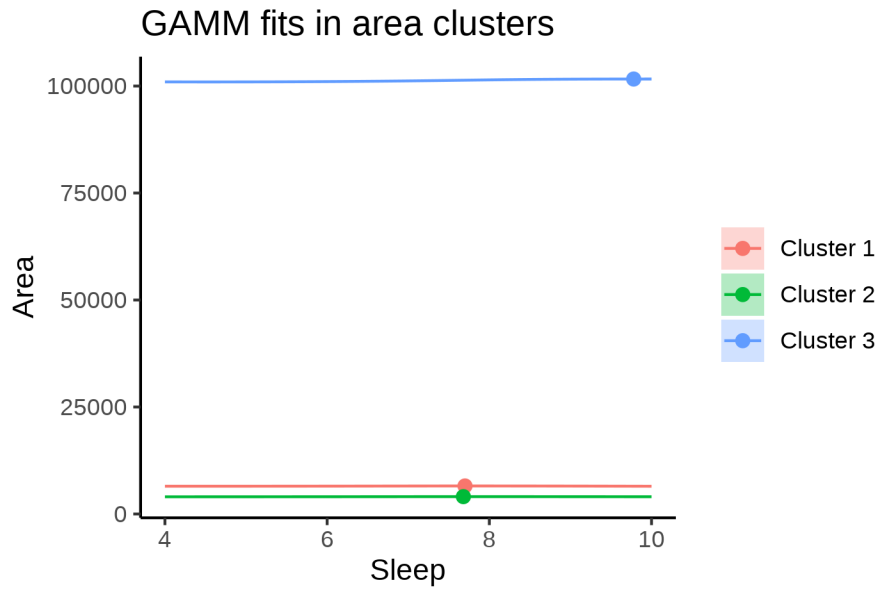

The next plot shows the same thing with percentages of cluster maximum.



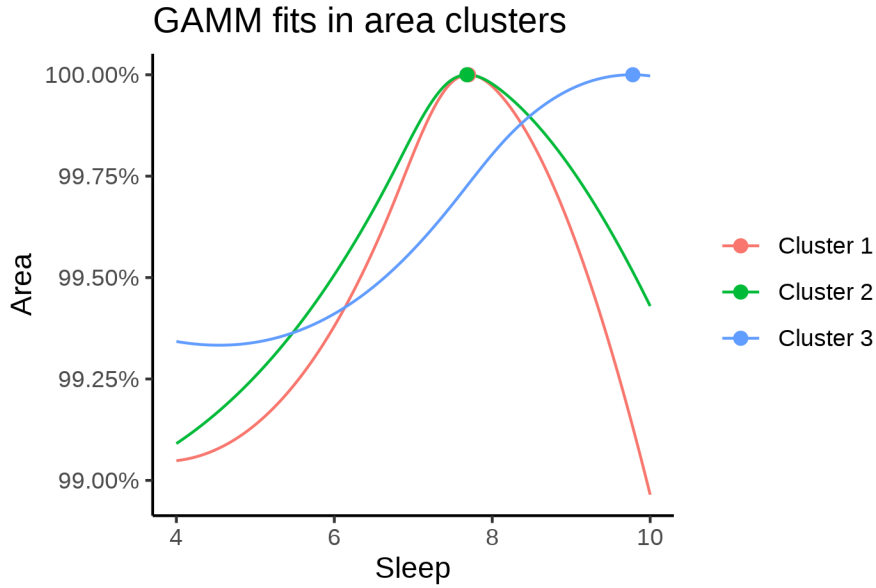

The table below shows the sleep duration associated with maximum value in each cluster, with 95% CIs.

| Cluster   | Sleep at max. (95% CI) |
|-----------|------------------------|
| Cluster 1 | 7.7 (7.5, 8.1)         |
| Cluster 2 | 7.7 (7.5, 8.2)         |
| Cluster 3 | 9.8 (8.7, 10)          |

### Meta analysis

The same GAMMs were estimated separately for each scanner and combined using meta analysis (metagam). The plot compares the resulting curves to the ones obtained by fitting a model to the whole data.

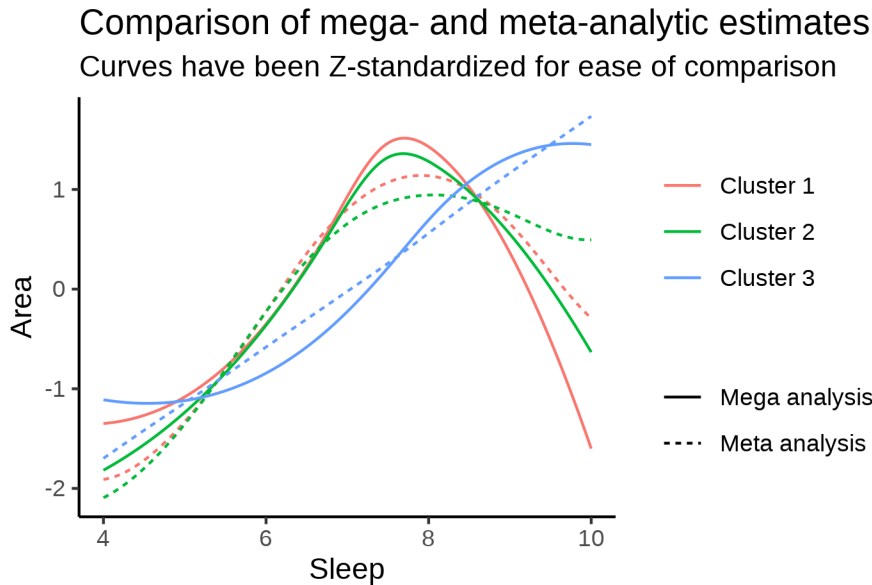

The table below shows the sleep duration associated with maximum value in each cluster, using this meta

analysis. Confidence statements are not easy to obtain when meta analyzing GAMMs, so only point estimates are shown.

| Cluster   | Sleep at max. |
|-----------|---------------|
| Cluster 1 | 7.9           |
| Cluster 2 | 8.1           |
| Cluster 3 | 10            |

## Thickness

The following regions go in each cluster:

- Cluster 1: caudalanteriorcingulate, cuneus, isthmuscingulate, lateraloccipital, lingual, parsorbitalis, pericalcarine, precuneus, superiorparietal
- Cluster 2: bankssts, caudalmiddlefrontal, entorhinal, fusiform, inferiorparietal, inferiortemporal, lateralorbitofrontal, middletemporal, parstriangularis, postcentral, precentral, rostralmiddlefrontal, superiorfrontal, superiortemporal, supramarginal, transversetemporal
- Cluster 3: frontalpole, insula, medialorbitofrontal, paracentral, parahippocampal, parsopercularis, posteriorcingulate, rostralanteriorcingulate

## Description of clusters

First are spaghetti plots for the three clusters.

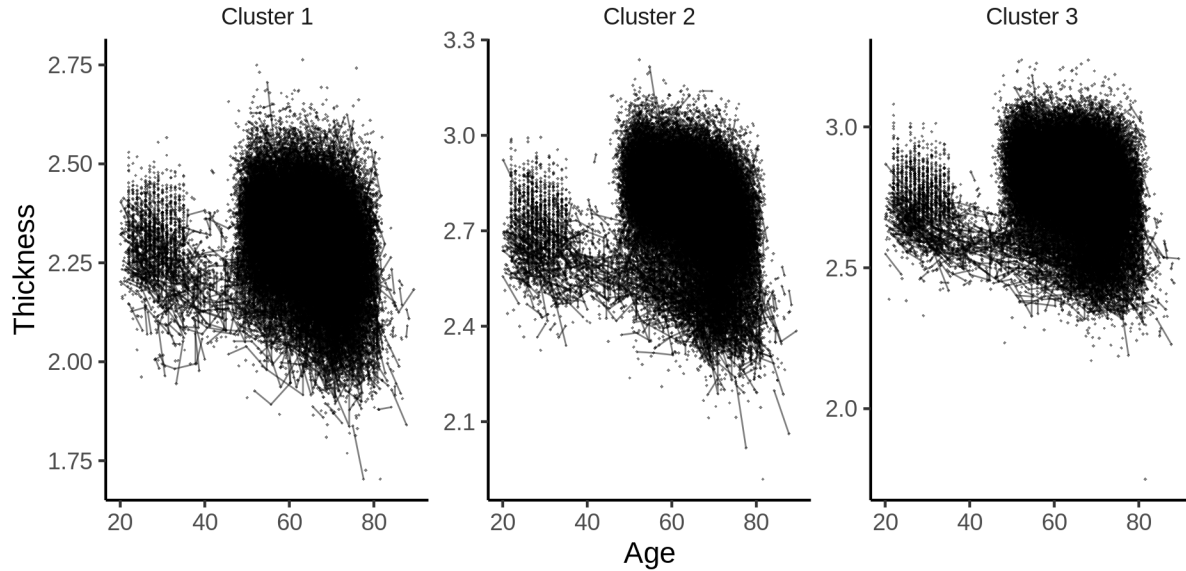

The plot below shows the sleep-volume curves for the three clusters.

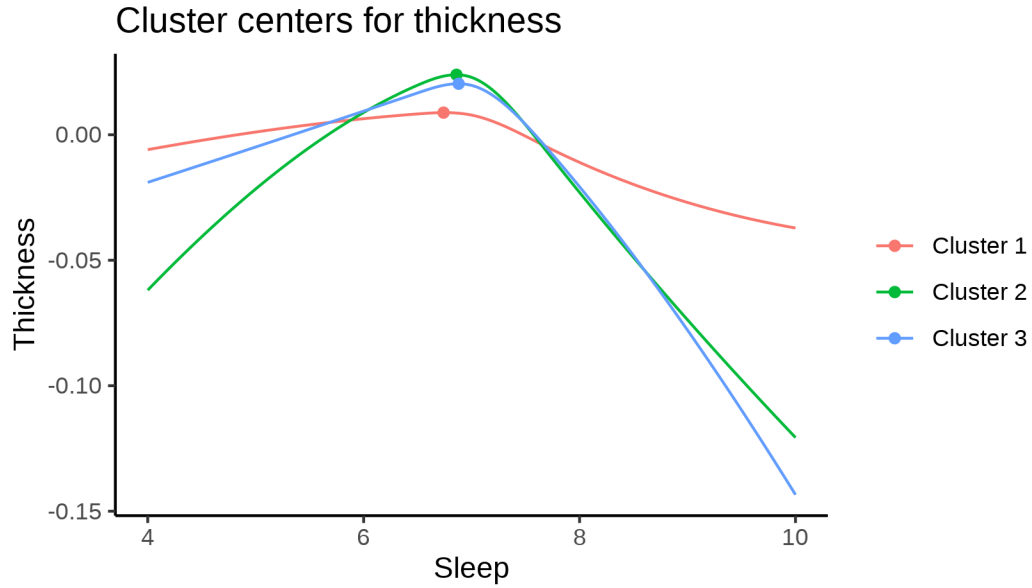

The maximum values for each cluster occur at the following sleep durations:

| Cluster   | Sleep |
|-----------|-------|
| Cluster 1 | 6.74  |
| Cluster 2 | 6.86  |
| Cluster 3 | 6.88  |

The next plot shows the effect of varying the sleep duration as a percentage of the maximum value, obtained at the top of the curve. We have to scrutinize these percentages a bit, because actually defining the mean and standard deviations for each cluster turned out to be not that straightforward, but I believe that what I did makes sense. The problem is that the original clustering is done on a Z-transformed scale, since we are interested in differences in shapes of the curves, and not differences in absolute values of area/thickness/volume between the regions. Then I had to define conversion factors by weighting the mean and variances of each region in each cluster, and try to scale it back.

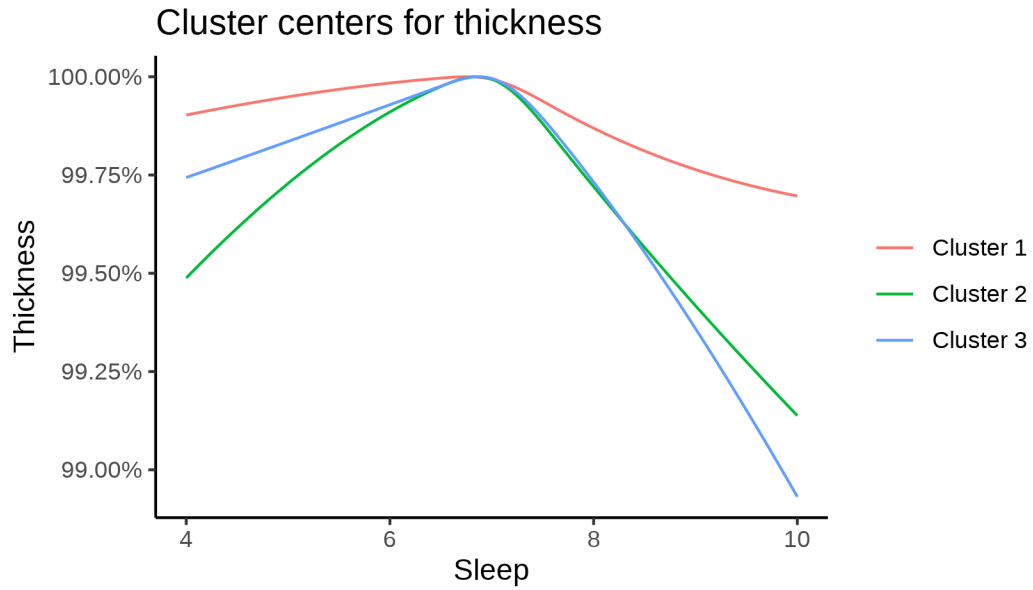

For completeness, we also show the cluster curves upon which the percentage plot above was based.

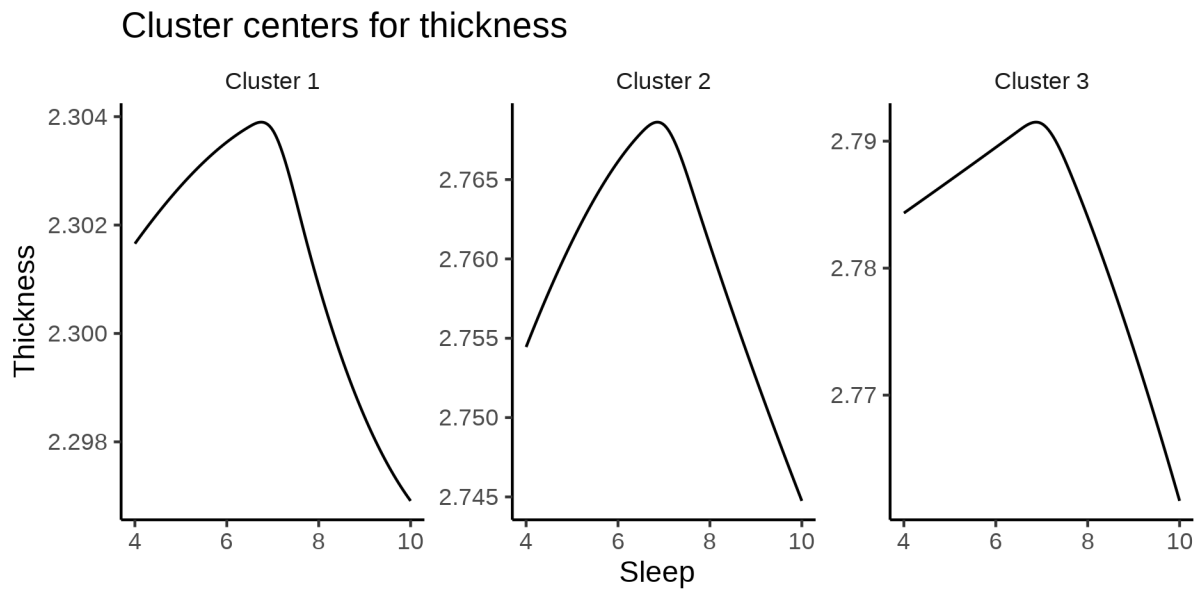

The next plot shows the location of the clusters.

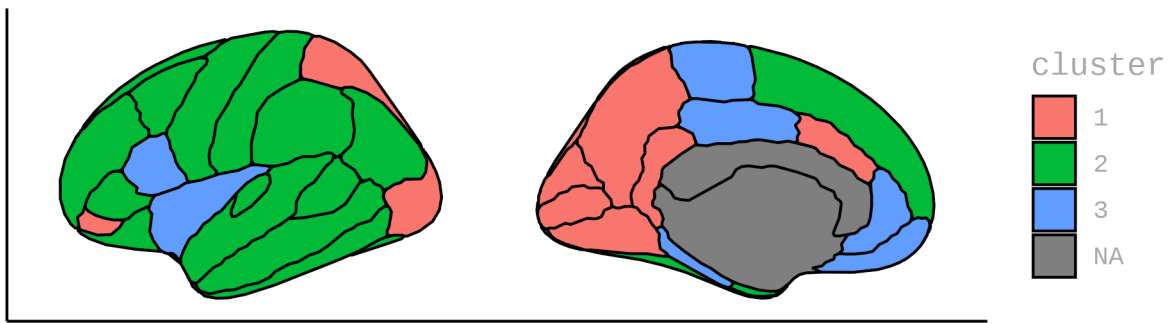

### GAMM fits in each cluster

The plot below shows the results of fitting GAMMs to the (weighted) average in each cluster.

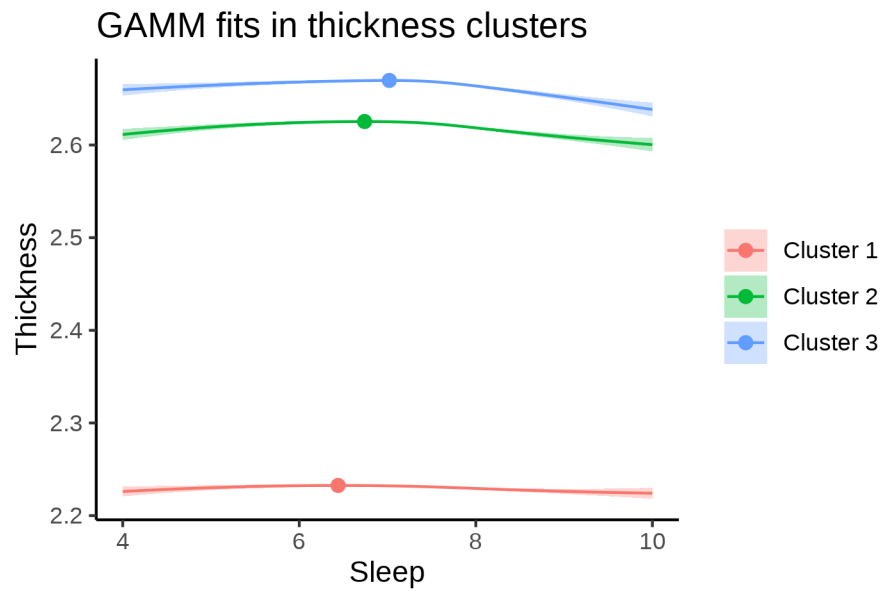

The next plot shows the same thing with percentages of cluster maximum.

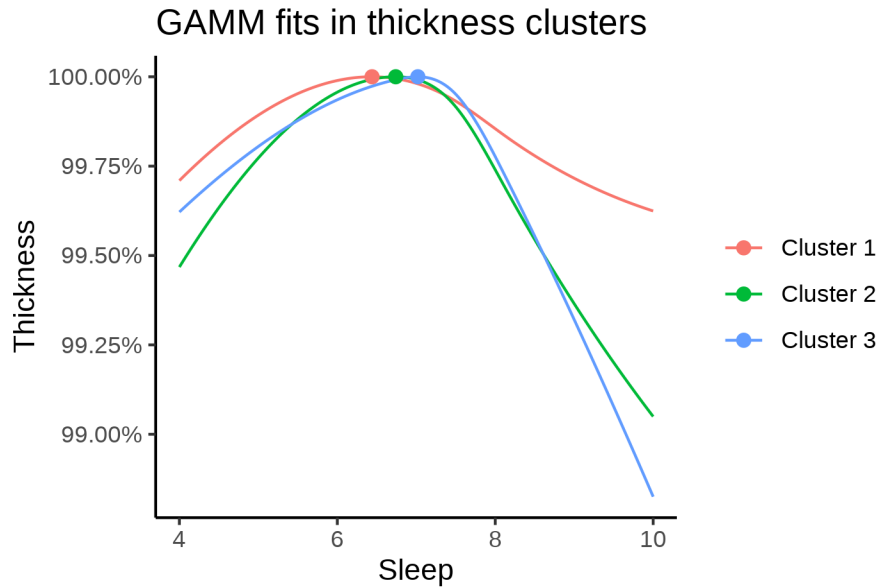

The table below shows the sleep duration associated with maximum value in each cluster, with 95% CIs.

| Cluster   | Sleep at max. (95% CI) |
|-----------|------------------------|
| Cluster 1 | 6.4 (5.7, 7.1)         |
| Cluster 2 | 6.7 (6.3, 7.1)         |
| Cluster 3 | 7 (6.4, 7.2)           |

### Meta analysis

The same GAMMs were estimated separately for each scanner and combined using meta analysis (metagam). The plot compares the resulting curves to the ones obtained by fitting a model to the whole data.

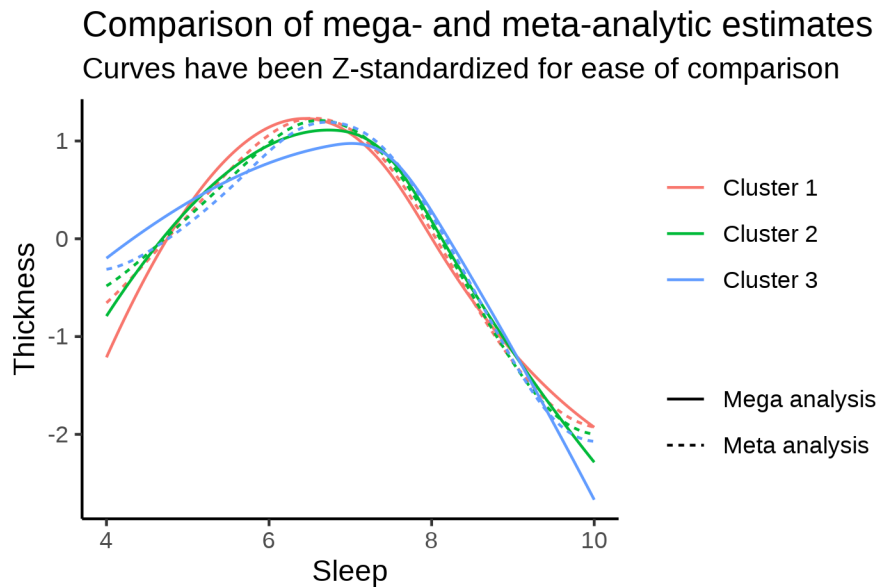

The table below shows the sleep duration associated with maximum value in each cluster, using this meta

analysis. Confidence statements are not easy to obtain when meta analyzing GAMMs, so only point estimates are shown.

| Cluster   | Sleep at max. |
|-----------|---------------|
| Cluster 1 | 6.6           |
| Cluster 2 | 6.6           |
| Cluster 3 | 6.7           |

## Volume

The following regions go in each cluster:

- Cluster 1: bankssts, fusiform, inferior temporal, lateral occipital, medial orbitofrontal, paracentral, pars opercularis, pericalcarine, postcentral, superior frontal, superior parietal, superior temporal, supramarginal
- Cluster 2: caudal anterior cingulate, cuneus, entorhinal, frontal pole, isthmus cingulate, lateral orbitofrontal, lingual, parahippocampal, pars orbitalis, parstriangularis, posterior cingulate, precuneus, rostral anterior cingulate, rostral middle frontal, transversal temporal
- Cluster 3: caudal middle frontal, inferior parietal, insula, middle temporal, precentral

## Description of clusters

First are spaghetti plots for the three clusters.

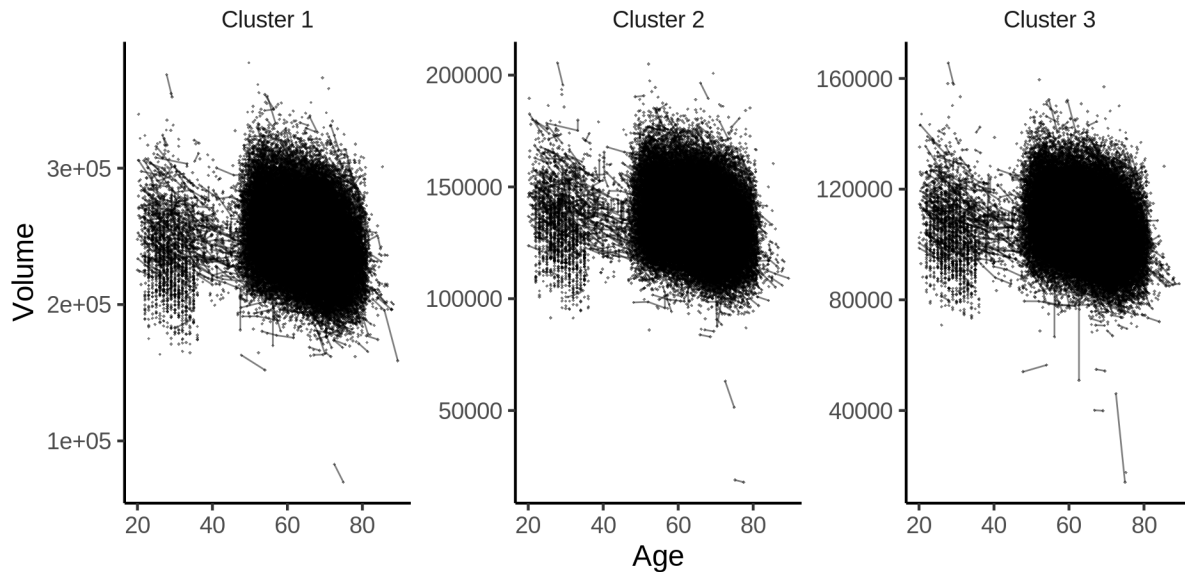

The plot below shows the sleep-volume curves for the three clusters.

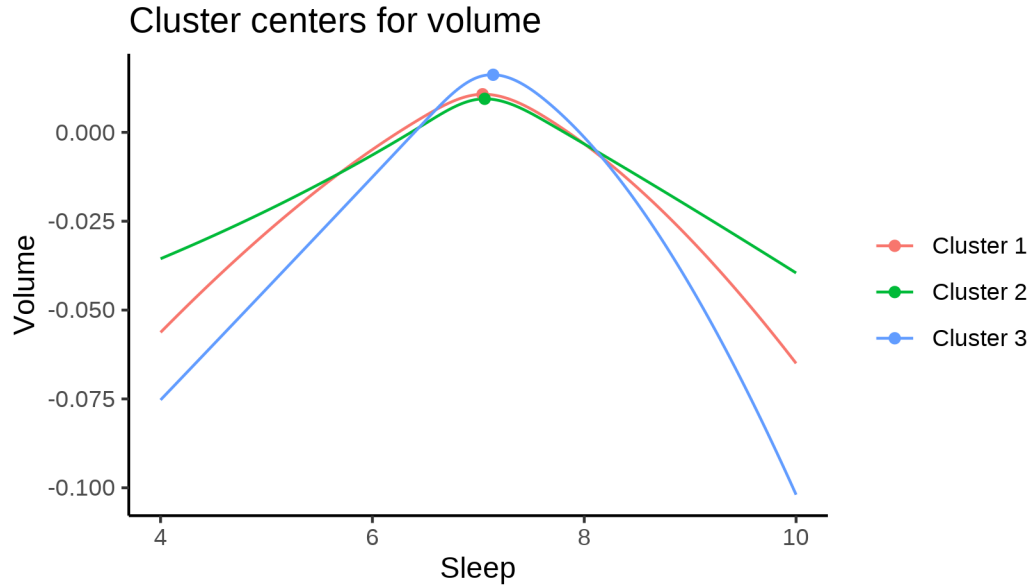

The maximum values for each cluster occur at the following sleep durations:

| Cluster   | Sleep |
|-----------|-------|
| Cluster 1 | 7.04  |
| Cluster 2 | 7.06  |
| Cluster 3 | 7.14  |

The next plot shows the effect of varying the sleep duration as a percentage of the maximum value, obtained at the top of the curve. We have to scrutinize these percentages a bit, because actually defining the mean and standard deviations for each cluster turned out to be not that straightforward, but I believe that what I did makes sense. The problem is that the original clustering is done on a Z-transformed scale, since we are interested in differences in shapes of the curves, and not differences in absolute values of area/thickness/volume between the regions. Then I had to define conversion factors by weighting the mean and variances of each region in each cluster, and try to scale it back.



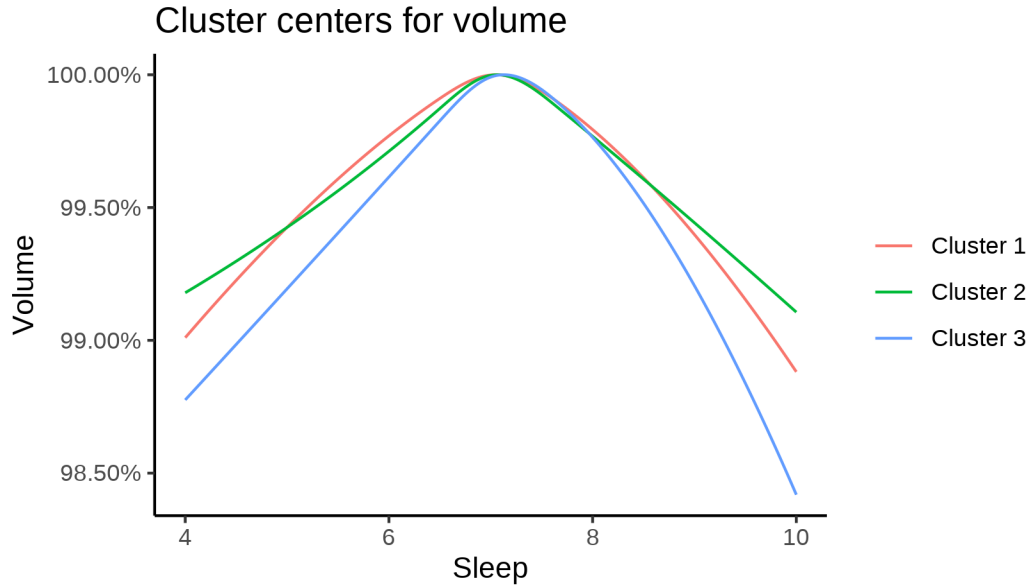

For completeness, we also show the cluster curves upon which the percentage plot above was based. Note that the values differ between clusters, since their sizes are different.

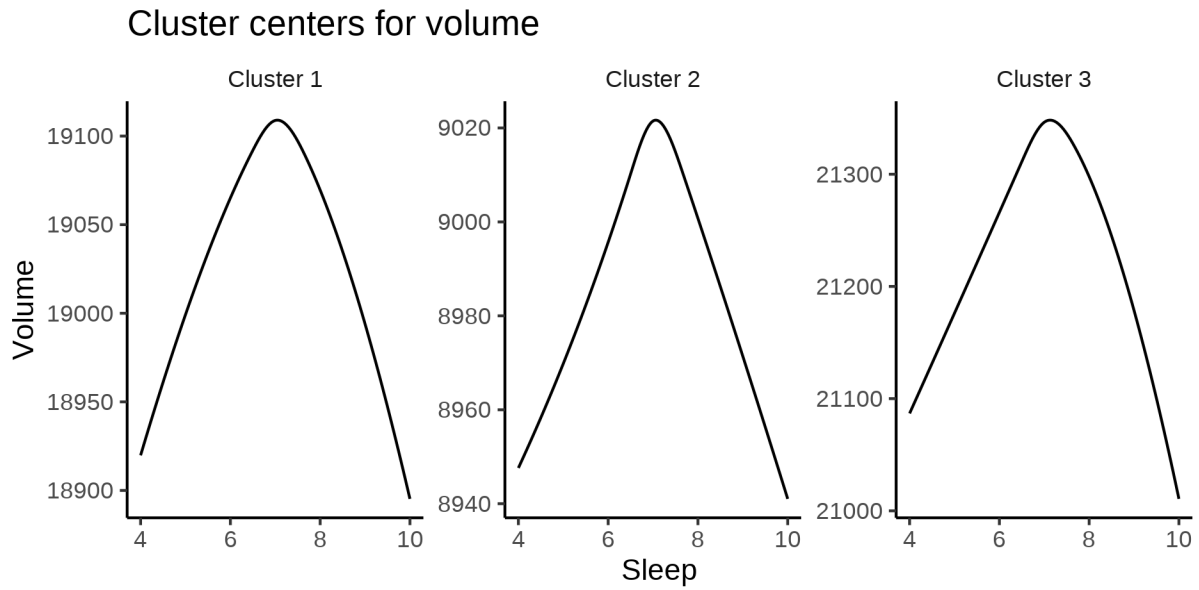

The next plot shows the location of the clusters.

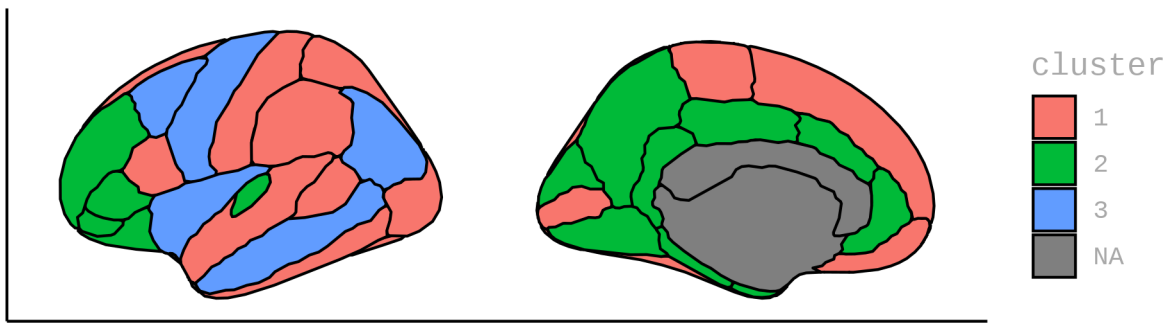

### GAMM fits in each cluster

The plot below shows the results of fitting GAMMs to the (weighted) average in each cluster.

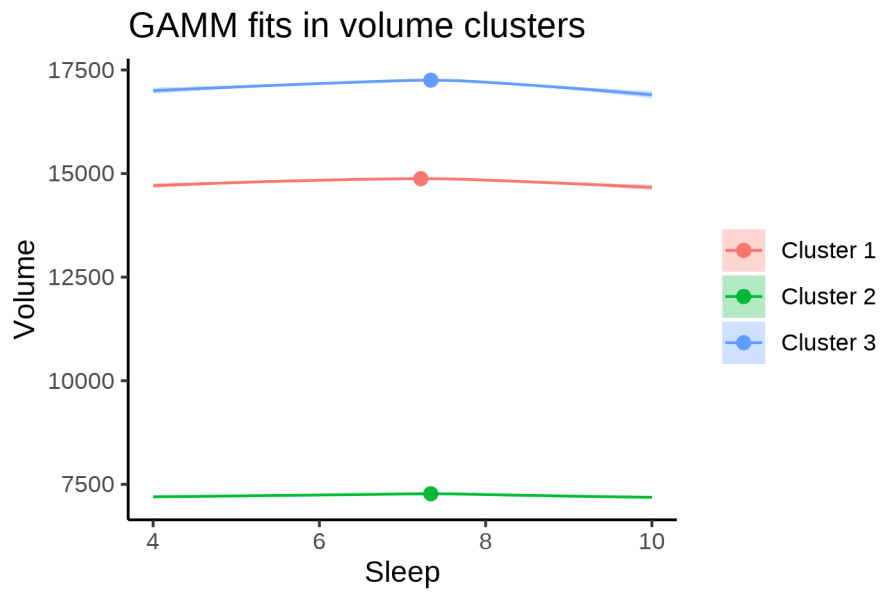

The next plot shows the same thing with percentages of cluster maximum.

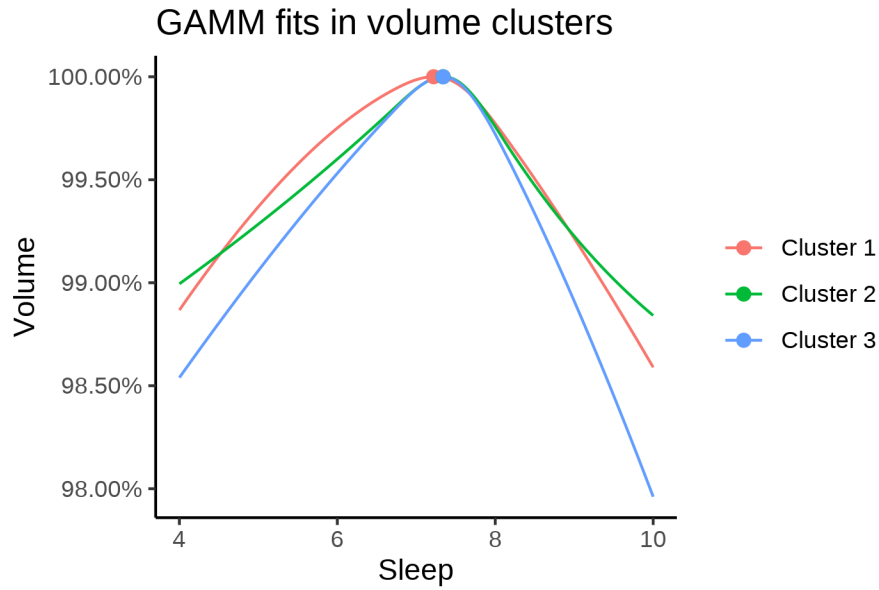

The table below shows the sleep duration associated with maximum value in each cluster, with 95% CIs.

| Cluster   | Sleep at max. (95% CI) |
|-----------|------------------------|
| Cluster 1 | 7.2 (6.9, 7.4)         |
| Cluster 2 | 7.3 (7.2, 7.4)         |
| Cluster 3 | 7.3 (7.2, 7.4)         |

### Meta analysis

The same GAMMs were estimated separately for each scanner and combined using meta analysis (metagam). The plot compares the resulting curves to the ones obtained by fitting a model to the whole data.

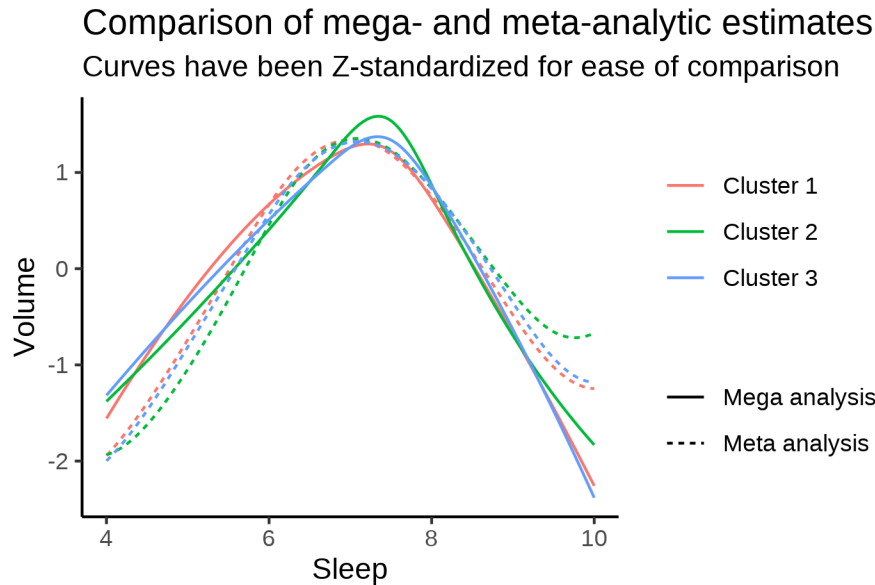

The table below shows the sleep duration associated with maximum value in each cluster, using this meta

analysis. Confidence statements are not easy to obtain when meta analyzing GAMMs, so only point estimates are shown.

| Cluster   | Sleep at max. |
|-----------|---------------|
| Cluster 1 | 7             |
| Cluster 2 | 7.1           |
| Cluster 3 | 7.1           |

## References

- Conde, Irene Castro, and Jacobo de Una Alvarez. 2020. *Sgof: Multiple Hypothesis Testing*. <https://CRAN.R-project.org/package=sgof>.
- Mowinckel, Athanasia M., and Didac Vidal-Piñeiro. 2020. “Visualization of Brain Statistics with r Packages Ggseg and Ggseg3d.” *Advances in Methods and Practices in Psychological Science* 3 (4): 466–83. <https://doi.org/10.1177/2515245920928009>.
- R Core Team. 2020. *R: A Language and Environment for Statistical Computing*. Vienna, Austria: R Foundation for Statistical Computing. <https://www.R-project.org/>.
- Sørensen, Øystein, Andreas M. Brandmaier, Didac Macia, Klaus Ebmeier, Paolo Ghisletta, Rogier A. Kievit, Athanasia M. Mowinckel, Kristine B. Walhovd, Rene Westerhausen, and Anders Fjell. 2021. “Meta-Analysis of Generalized Additive Models in Neuroimaging Studies.” *NeuroImage* 224: 117416. <https://doi.org/10.1016/j.neuroimage.2020.117416>.
- Wickham, Hadley, Mara Averick, Jennifer Bryan, Winston Chang, Lucy D’Agostino McGowan, Romain François, Garrett Golemund, et al. 2019. “Welcome to the tidyverse.” *Journal of Open Source Software* 4 (43): 1686. <https://doi.org/10.21105/joss.01686>.
- Wood, Simon, and Fabian Scheipl. 2020. *Gamm4: Generalized Additive Mixed Models Using 'Mgcv' and 'Lme4'*. <https://CRAN.R-project.org/package=gamm4>.

# Subcortical volumes

## Overview of software and methods

All analyses were run in R version 4.0.0 (R Core Team 2020). The set of R packages provided by `tidyverse` (Wickham et al. 2019) were invaluable for data manipulation and visualization, in particular `ggplot2` (Wickham 2016), `dplyr` (Wickham et al. 2021), `tidyr` (Wickham 2021) and `purrr` (Henry and Wickham 2020). Furthermore, `gamm4` (S. Wood and Scheipl 2020) and `mgcv` (S. N. Wood 2017) were used for fitting generalized additive models. Posterior intervals for the sleep duration associated with maximum volume were computed with a method described in Sørensen, Walhovd, and Fjell (2021), based on Ruppert, Wand, and Carroll (2003). The `HDInterval` package was used to compute highest posterior density intervals, and `sgof` was used to correct for multiple comparisons using the Benjamini-Hochberg procedure (Benjamini and Hochberg 1995). Finally, `glue` (Hester 2020) and `stringr` (Wickham 2019) were used extensively for text manipulation.

## Data overview

The total number of observations was 51309, from 47034 unique participants. The age range was from 20 to 89.4. The sex count is shown below.

| sex    | n     |
|--------|-------|
| female | 26805 |
| male   | 24504 |

Follow-up intervals are shown below.

| Participants with follow-up | Mean follow-up | Max follow-up | Min follow-up |
|-----------------------------|----------------|---------------|---------------|
| 3904                        | 2.509695       | 11.22656      | 0.0054795     |

In order to remove outliers, the following model was fit to each region:

```
mod <- gamm4(value ~ s(age, bs = "cr") + sex + site,  
             random = ~(1|id), data = data)
```

Outliers were defined by having a residual more than four times the magnitude of the residuals standard error. Technically, all values which returned `TRUE` on the following test were retained, all others were removed as outliers.

```
abs(residuals(mod$mer)) < 4 * sigma(mod$mer)
```

The table below shows the number of outliers removed per region.

| region         | initial_rows | retained_rows | outliers_removed |
|----------------|--------------|---------------|------------------|
| Accumbens-area | 51309        | 51304         | 5                |

| region                        | initial_rows | retained_rows | outliers_removed |
|-------------------------------|--------------|---------------|------------------|
| Amygdala                      | 51309        | 51303         | 6                |
| Brain-Stem                    | 51309        | 51286         | 23               |
| Caudate                       | 51309        | 51295         | 14               |
| CC_Anterior                   | 51309        | 51293         | 16               |
| CC_Central                    | 51309        | 51296         | 13               |
| CC_Mid_Anterior               | 51309        | 51287         | 22               |
| CC_Mid_Posterior              | 51309        | 51268         | 41               |
| CC_Posterior                  | 51309        | 51255         | 54               |
| Cerebellum-Cortex             | 51309        | 51280         | 29               |
| Cerebellum-White-Matter       | 51309        | 51275         | 34               |
| CerebralWhiteMatterVol        | 51309        | 51300         | 9                |
| EstimatedTotalIntraCranialVol | 51309        | 51289         | 20               |
| Hippocampus                   | 51309        | 51299         | 10               |
| Pallidum                      | 51309        | 51300         | 9                |
| Putamen                       | 51309        | 51287         | 22               |
| Thalamus                      | 51308        | 51288         | 20               |
| TotalGrayVol                  | 51309        | 51302         | 7                |
| Ventricles                    | 51309        | 51288         | 21               |

The plot below shows the average sleep duration as a function of age, fit with a GAM. This model will be used for comparisons later. All sleep durations in this document are confined to lie between 4 and 10 hours, to avoid nonsensical answers.

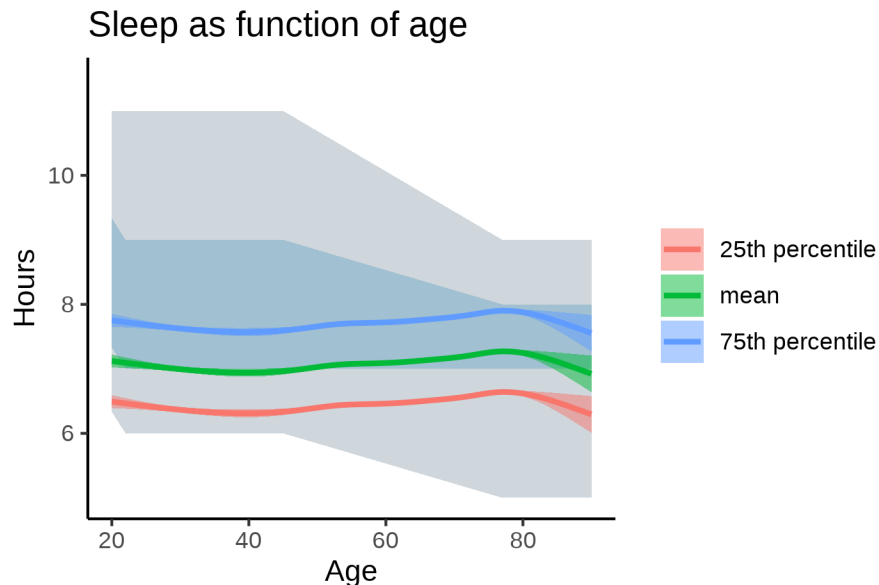

The model statistics is shown next.

```
##
## Family: gaussian
## Link function: identity
##
## Formula:
## sleep ~ s(age, bs = "cr")
##
## Parametric coefficients:
```

```

##           Estimate Std. Error t value Pr(>|t|)
## (Intercept) 7.134088  0.004306  1657 <2e-16 ***
## ---
## Signif. codes:  0 '***' 0.001 '**' 0.01 '*' 0.05 '.' 0.1 ' ' 1
##
## Approximate significance of smooth terms:
##           edf Ref.df    F p-value
## s(age) 6.866  7.865 33.11 <2e-16 ***
## ---
## Signif. codes:  0 '***' 0.001 '**' 0.01 '*' 0.05 '.' 0.1 ' ' 1
##
## R-sq.(adj) =  0.00555  Deviance explained = 0.57%
## -REML = 63539  Scale est. = 0.87222  n = 47034

```

## Accumbens-area

### Descriptive statistics

| Study | Observations | Unique IDs | Mean age | Age range |
|-------|--------------|------------|----------|-----------|
| HCP   | 974          | 974        | 28.8     | 22 - 37   |
| MPIB  | 675          | 391        | 63.2     | 24 - 83   |
| UB    | 113          | 39         | 70.9     | 64 - 81   |
| UCAM  | 884          | 632        | 55.1     | 20 - 88   |
| UiO   | 1474         | 803        | 49.4     | 20 - 89   |
| UKB   | 45983        | 43137      | 64.5     | 45 - 83   |
| UmU   | 412          | 279        | 62.2     | 25 - 85   |
| UOXF  | 769          | 769        | 69.8     | 60 - 85   |

### Spaghetti plot

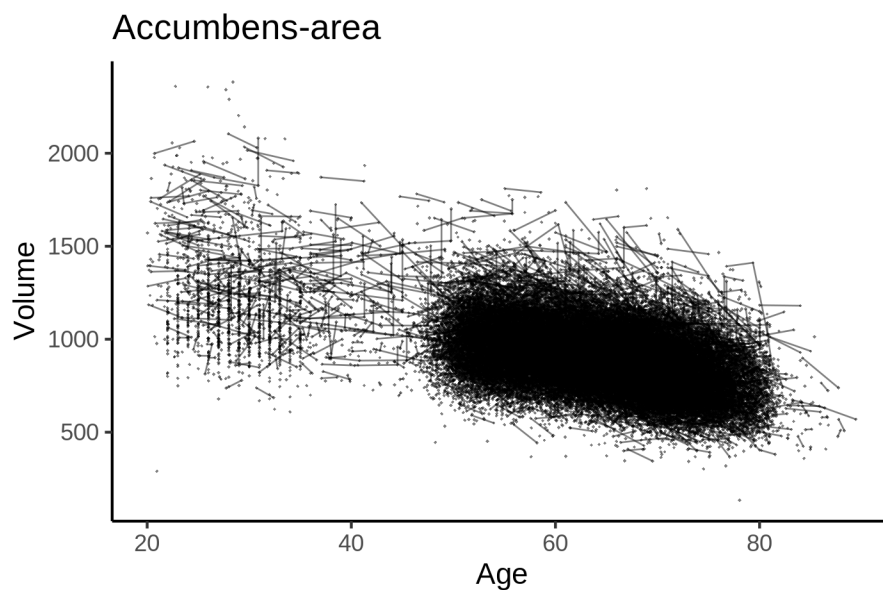

## Models Controlling for ICV

### Model outputs

Model without sleep term

```
##
## Family: gaussian
## Link function: identity
##
## Formula:
## value ~ sex + site + icv + s(age_z, k = 10, bs = "cr")
## <environment: 0x55895ffe2630>
##
## Parametric coefficients:
##           Estimate Std. Error t value Pr(>|t|)
## (Intercept)  804.8127    7.7589 103.728 < 2e-16 ***
## sexmale      19.6585    1.5399  12.766 < 2e-16 ***
## siteMPIB     93.4406    9.6688   9.664 < 2e-16 ***
## siteousAvanto 238.5581    8.2505  28.914 < 2e-16 ***
## siteousPrisma 101.7601   13.6246   7.469 8.22e-14 ***
## siteousSkyra 407.8635    7.4140  55.013 < 2e-16 ***
## siteUB       64.9295   22.1399   2.933 0.00336 **
## siteUCAM     4.7150    8.4310   0.559 0.57599
## siteUKB      82.5578    7.9644  10.366 < 2e-16 ***
## siteUmU     370.4055   10.8585  34.112 < 2e-16 ***
## siteUOXF     59.9033    9.3475   6.408 1.48e-10 ***
## icv         59.6320    0.7755  76.891 < 2e-16 ***
## ---
## Signif. codes:  0 '***' 0.001 '**' 0.01 '*' 0.05 '.' 0.1 ' ' 1
##
## Approximate significance of smooth terms:
##           edf Ref.df   F p-value
## s(age_z) 8.146  8.146 1886 <2e-16 ***
## ---
## Signif. codes:  0 '***' 0.001 '**' 0.01 '*' 0.05 '.' 0.1 ' ' 1
##
## R-sq.(adj) =  0.469
## lmer.REML = 6.4415e+05  Scale est. = 2924      n = 51284
```

Model with only main effects of age and sleep

```
##
## Family: gaussian
## Link function: identity
##
## Formula:
## value ~ sex + site + icv + s(age_z, k = 10, bs = "cr") + s(sleep_z,
##           k = 5, bs = "cr")
## <environment: 0x55895ffe2630>
##
## Parametric coefficients:
##           Estimate Std. Error t value Pr(>|t|)
## (Intercept)  804.8190    7.7665 103.626 < 2e-16 ***
## sexmale      19.6587    1.5399  12.766 < 2e-16 ***
```



```

## siteMPIB      93.4336      9.6760      9.656 < 2e-16 ***
## siteousAvanto 238.5549      8.2525     28.907 < 2e-16 ***
## siteousPrisma 101.7580     13.6251      7.468 8.25e-14 ***
## siteousSkyra  407.8601      7.4164     54.994 < 2e-16 ***
## siteUB        64.9277     22.1402      2.933 0.00336 **
## siteUCAM      4.7118      8.4330      0.559 0.57634
## siteUKB       82.5511      7.9728     10.354 < 2e-16 ***
## siteUmU       370.3912     10.8845     34.029 < 2e-16 ***
## siteUOXF      59.9001      9.3493      6.407 1.50e-10 ***
## icv           59.6315      0.7759     76.855 < 2e-16 ***
## ---
## Signif. codes:  0 '***' 0.001 '**' 0.01 '*' 0.05 '.' 0.1 ' ' 1
##
## Approximate significance of smooth terms:
##              edf Ref.df      F p-value
## s(age_z)     8.146  8.146 1881 <2e-16 ***
## s(sleep_z)   1.000  1.000   0  0.984
## ---
## Signif. codes:  0 '***' 0.001 '**' 0.01 '*' 0.05 '.' 0.1 ' ' 1
##
## R-sq.(adj) =  0.469
## lmer.REML = 6.4415e+05  Scale est. = 2924      n = 51284

Model with full interaction between age and sleep

##
## Family: gaussian
## Link function: identity
##
## Formula:
## value ~ sex + site + icv + t2(age_z, sleep_z, k = c(10, 4), bs = "cr")
## <environment: 0x55895ffe2630>
##
## Parametric coefficients:
##              Estimate Std. Error t value Pr(>|t|)
## (Intercept)  805.9358    7.8163 103.110 < 2e-16 ***
## sexmale      19.6516     1.5433  12.733 < 2e-16 ***
## siteMPIB     92.5734     9.7397   9.505 < 2e-16 ***
## siteousAvanto 237.6040     8.3004  28.626 < 2e-16 ***
## siteousPrisma 100.7575    13.6575   7.377 1.64e-13 ***
## siteousSkyra  406.9034     7.4726  54.453 < 2e-16 ***
## siteUB       63.8693    22.1645   2.882 0.00396 **
## siteUCAM      3.5306     8.4923   0.416 0.67760
## siteUKB       81.4073     8.0235  10.146 < 2e-16 ***
## siteUmU       369.4282    10.9343  33.786 < 2e-16 ***
## siteUOXF      58.7589     9.4007   6.251 4.12e-10 ***
## icv           59.6143     0.7761  76.811 < 2e-16 ***
## ---
## Signif. codes:  0 '***' 0.001 '**' 0.01 '*' 0.05 '.' 0.1 ' ' 1
##
## Approximate significance of smooth terms:
##              edf Ref.df      F p-value
## t2(age_z,sleep_z) 13.57  13.57 17.89 <2e-16 ***
## ---
## Signif. codes:  0 '***' 0.001 '**' 0.01 '*' 0.05 '.' 0.1 ' ' 1

```

```
##
## R-sq.(adj) = 0.469
## lmer.REML = 6.4417e+05 Scale est. = 2923.4 n = 51284
```

### Model comparison

`mod_no_sleep` refers to model without sleep term, `mod_no_interaction` refers to model with only main effect of sleep, and `mod_full` refers to model with a full interaction between age and sleep. This is a nested model comparison, and the p-value at a given line refers to comparing the model at the line to the model on the line above. Hence, significance implies that the more complicated model is supported on statistical grounds.

To be even more specific, the p-value on the second row tests whether there is an association between sleep and volume. The p-value on the third row tests whether this association depends on age.

```
## Data: NULL
## Models:
## ml$mod_no_sleep$mer: NULL
## ml$mod_no_interaction$mer: NULL
## ml$mod_full$mer: NULL
##
##          npar    AIC    BIC logLik deviance Chisq Df Pr(>Chisq)
## ml$mod_no_sleep$mer      16 644185 644327 -322077    644153
## ml$mod_no_interaction$mer  18 644189 644349 -322077    644153 4e-04  2    0.9998
## ml$mod_full$mer          20 644206 644383 -322083    644166 0e+00  2    1.0000
```

We chose the model based on the likelihood ratio test with 5 % significance level, which was `mod_no_sleep`.

### Lifespan brain trajectory

The trajectory shown is from the chosen model `mod_no_sleep`.

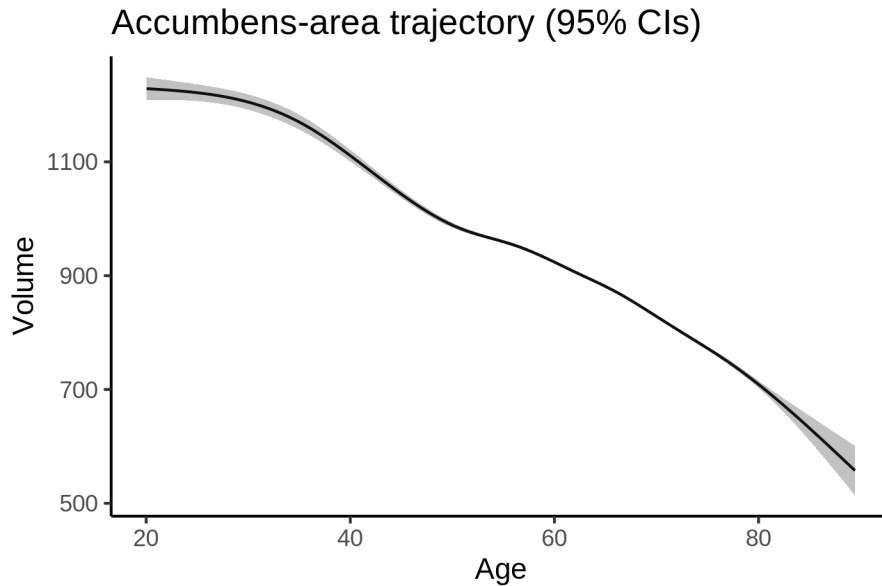

### Effect of sleep

The chosen model did not include a sleep term, and hence we don't have any estimated effect of sleep.

We show the full interaction model for completeness, although it was not selected.

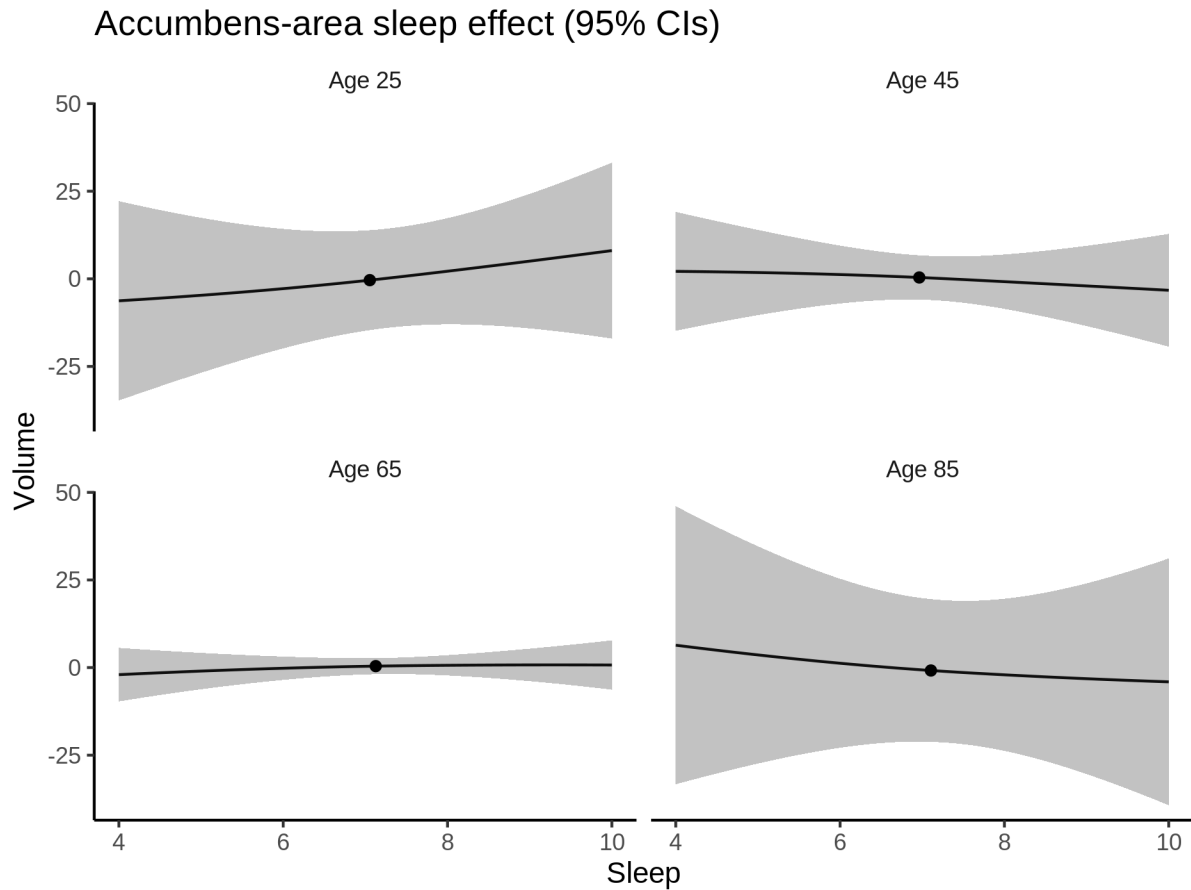

### Deviation from sleep associated with maximal volume

Model with no sleep term was selected. No plots to show. (Although we can of course dig up the plots, which will be pretty flat).

### Comparison of mean sleep and sleep associated with maximum volume

Nothing to show, as we did not find an association between sleep and volume.

### Controlling for covariates

Below is the output for a model in which we only include data with income and education.

```
##  
## Family: gaussian  
## Link function: identity  
##  
## Formula:  
## value ~ sex + site + s(age_z, k = 10, bs = "cr") + s(sleep_z,  
##     k = 5, bs = "cr") + icv  
## <environment: 0x55895e488040>
```

```

##
## Parametric coefficients:
##           Estimate Std. Error t value Pr(>|t|)
## (Intercept)  938.3691   17.3056  54.223 < 2e-16 ***
## sexmale      19.0636    1.9217   9.920 < 2e-16 ***
## siteousAvanto 102.1468   22.2358   4.594 4.37e-06 ***
## siteousPrisma -3.9207    21.5069  -0.182 0.855348
## siteousSkyra  297.1959   18.7414  15.858 < 2e-16 ***
## siteUKB      -57.7167   17.2759  -3.341 0.000836 ***
## siteUOXF     -52.5807   19.4907  -2.698 0.006985 **
## icv          61.5419    0.9881  62.283 < 2e-16 ***
## ---
## Signif. codes:  0 '***' 0.001 '**' 0.01 '*' 0.05 '.' 0.1 ' ' 1
##
## Approximate significance of smooth terms:
##           edf Ref.df      F p-value
## s(age_z)   5.584  5.584 1484.432 <2e-16 ***
## s(sleep_z) 1.000  1.000   0.007  0.936
## ---
## Signif. codes:  0 '***' 0.001 '**' 0.01 '*' 0.05 '.' 0.1 ' ' 1
##
## R-sq.(adj) =  0.42
## lmer.REML = 3.9053e+05  Scale est. = 2896.3    n = 31198

```

Below is the output for a model in which we control for the main effects of income and education.

```

##
## Family: gaussian
## Link function: identity
##
## Formula:
## value ~ sex + site + s(age_z, k = 10, bs = "cr") + s(sleep_z,
##           k = 5, bs = "cr") + icv + income_scaled + education_scaled
## <environment: 0x55895e488040>
##
## Parametric coefficients:
##           Estimate Std. Error t value Pr(>|t|)
## (Intercept)  938.5088   17.4209  53.873 < 2e-16 ***
## sexmale      19.0807    1.9274   9.900 < 2e-16 ***
## siteousAvanto 102.0966   22.2413   4.590 4.44e-06 ***
## siteousPrisma -3.9060    21.5093  -0.182 0.85590
## siteousSkyra  297.1522   18.7469  15.851 < 2e-16 ***
## siteUKB      -57.7938   17.2878  -3.343 0.00083 ***
## siteUOXF     -52.6609   19.5034  -2.700 0.00694 **
## icv          61.5526    0.9970  61.741 < 2e-16 ***
## income_scaled -0.3286    2.2887  -0.144 0.88585
## education_scaled 0.1071    2.7026   0.040 0.96838
## ---
## Signif. codes:  0 '***' 0.001 '**' 0.01 '*' 0.05 '.' 0.1 ' ' 1
##
## Approximate significance of smooth terms:
##           edf Ref.df      F p-value
## s(age_z)   5.582  5.582 1369.990 <2e-16 ***
## s(sleep_z) 1.000  1.000   0.007  0.934
## ---

```

```
## Signif. codes:  0 '***' 0.001 '**' 0.01 '*' 0.05 '.' 0.1 ' ' 1
##
## R-sq.(adj) =  0.42
## lmer.REML = 3.9052e+05  Scale est. = 2896.2    n = 31198
```

We also included interaction effects between sleep duration and education and income, in another model. The output is shown below, and the interaction terms are `income_scaled:sleep_z` and `education_scaled:sleep_z`.

```
##
## Family: gaussian
## Link function: identity
##
## Formula:
## value ~ sex + site + s(age_z, k = 10, bs = "cr") + s(sleep_z,
##      k = 5, bs = "cr") + icv + income_scaled + education_scaled +
##      income_scaled:sleep_z + education_scaled:sleep_z
## <environment: 0x55895e488040>
##
## Parametric coefficients:
##              Estimate Std. Error t value Pr(>|t|)
## (Intercept)   938.32418   17.42226  53.858 < 2e-16 ***
## sexmale       18.97004    1.92879   9.835 < 2e-16 ***
## siteousAvanto 102.05287   22.24188   4.588 4.49e-06 ***
## siteousPrisma  -4.25676   21.51145  -0.198 0.843137
## siteousSkyra  297.08491   18.74720  15.847 < 2e-16 ***
## siteUKB       -57.56930   17.28989  -3.330 0.000871 ***
## siteUOXF      -52.19445   19.50916  -2.675 0.007468 **
## icv           61.55597    0.99705  61.738 < 2e-16 ***
## income_scaled -0.21103    2.29004  -0.092 0.926577
## education_scaled 0.05215    2.70291   0.019 0.984607
## income_scaled:sleep_z -3.84086    2.26352  -1.697 0.089734 .
## education_scaled:sleep_z 0.64169    2.61657   0.245 0.806271
## ---
## Signif. codes:  0 '***' 0.001 '**' 0.01 '*' 0.05 '.' 0.1 ' ' 1
##
## Approximate significance of smooth terms:
##              edf Ref.df      F p-value
## s(age_z)     5.592  5.592 1366.359 <2e-16 ***
## s(sleep_z)   1.000  1.000   0.238  0.626
## ---
## Signif. codes:  0 '***' 0.001 '**' 0.01 '*' 0.05 '.' 0.1 ' ' 1
##
## R-sq.(adj) =  0.42
## lmer.REML = 3.9051e+05  Scale est. = 2896.4    n = 31198
```

We did the same controlling for BMI. Below is the model with no covariates but only keeping data with BMI.

```
##
## Family: gaussian
## Link function: identity
##
## Formula:
## value ~ sex + site + s(age_z, k = 10, bs = "cr") + s(sleep_z,
##      k = 5, bs = "cr") + icv
## <environment: 0x55895cab6808>
```

```

##
## Parametric coefficients:
##           Estimate Std. Error t value Pr(>|t|)
## (Intercept)  1037.137    14.861  69.788 < 2e-16 ***
## sexmale      15.633     1.877   8.330 < 2e-16 ***
## siteousPrisma -123.716    18.711  -6.612 3.85e-11 ***
## siteousSkyra  198.225    13.111  15.118 < 2e-16 ***
## siteUCAM     -226.695    15.369 -14.750 < 2e-16 ***
## siteUKB     -151.901    14.946 -10.163 < 2e-16 ***
## siteUmU      144.024    16.752   8.598 < 2e-16 ***
## icv          64.181     0.968  66.301 < 2e-16 ***
## ---
## Signif. codes:  0 '***' 0.001 '**' 0.01 '*' 0.05 '.' 0.1 ' ' 1
##
## Approximate significance of smooth terms:
##           edf Ref.df      F p-value
## s(age_z)   7.459  7.459 1368.800 <2e-16 ***
## s(sleep_z) 1.000  1.000   0.001  0.97
## ---
## Signif. codes:  0 '***' 0.001 '**' 0.01 '*' 0.05 '.' 0.1 ' ' 1
##
## R-sq.(adj) =  0.489
## lmer.REML = 4.1878e+05  Scale est. = 2945      n = 33442

```

Below is the model output with main effect.

```

##
## Family: gaussian
## Link function: identity
##
## Formula:
## value ~ sex + site + s(age_z, k = 10, bs = "cr") + s(sleep_z,
##           k = 5, bs = "cr") + icv + bmi
## <environment: 0x55895cab6808>
##
## Parametric coefficients:
##           Estimate Std. Error t value Pr(>|t|)
## (Intercept)  1038.54882    15.55427  66.769 < 2e-16 ***
## sexmale      15.67761     1.88225   8.329 < 2e-16 ***
## siteousPrisma -123.64785    18.71229  -6.608 3.96e-11 ***
## siteousSkyra  198.23852    13.11150  15.119 < 2e-16 ***
## siteUCAM     -226.65415    15.36997 -14.747 < 2e-16 ***
## siteUKB     -151.85605    14.94697 -10.160 < 2e-16 ***
## siteUmU      144.08791    16.75299   8.601 < 2e-16 ***
## icv          64.18900     0.96840  66.284 < 2e-16 ***
## bmi         -0.05605     0.18247  -0.307  0.759
## ---
## Signif. codes:  0 '***' 0.001 '**' 0.01 '*' 0.05 '.' 0.1 ' ' 1
##
## Approximate significance of smooth terms:
##           edf Ref.df      F p-value
## s(age_z)   7.459  7.459 1368.808 <2e-16 ***
## s(sleep_z) 1.000  1.000   0.001  0.981
## ---
## Signif. codes:  0 '***' 0.001 '**' 0.01 '*' 0.05 '.' 0.1 ' ' 1

```

```
##
## R-sq.(adj) = 0.489
## lmer.REML = 4.1878e+05 Scale est. = 2945 n = 33442
```

Next is the model with BMI-sleep interaction.

```
##
## Family: gaussian
## Link function: identity
##
## Formula:
## value ~ sex + site + s(age_z, k = 10, bs = "cr") + s(sleep_z,
## k = 5, bs = "cr") + icv + bmi + bmi:sleep_z
## <environment: 0x55895cab6808>
##
## Parametric coefficients:
## Estimate Std. Error t value Pr(>|t|)
## (Intercept) 1038.81270 15.56014 66.761 < 2e-16 ***
## sexmale 15.67329 1.88228 8.327 < 2e-16 ***
## siteousPrisma -123.66484 18.71242 -6.609 3.94e-11 ***
## siteousSkyra 198.19674 13.11171 15.116 < 2e-16 ***
## siteUCAM -226.76771 15.37113 -14.753 < 2e-16 ***
## siteUKB -151.96657 14.94810 -10.166 < 2e-16 ***
## siteUmU 143.98302 16.75393 8.594 < 2e-16 ***
## icv 64.18484 0.96843 66.277 < 2e-16 ***
## bmi -0.05987 0.18258 -0.328 0.743
## bmi:sleep_z -0.10713 0.17278 -0.620 0.535
## ---
## Signif. codes: 0 '***' 0.001 '**' 0.01 '*' 0.05 '.' 0.1 ' ' 1
##
## Approximate significance of smooth terms:
## edf Ref.df F p-value
## s(age_z) 7.459 7.459 1368.038 <2e-16 ***
## s(sleep_z) 1.000 1.000 0.379 0.538
## ---
## Signif. codes: 0 '***' 0.001 '**' 0.01 '*' 0.05 '.' 0.1 ' ' 1
##
## R-sq.(adj) = 0.489
## lmer.REML = 4.1878e+05 Scale est. = 2945 n = 33442
```

We did the same controlling for depression. Below is the model with no covariates but only keeping data with depression.

```
##
## Family: gaussian
## Link function: identity
##
## Formula:
## value ~ sex + site + s(age_z, k = 10, bs = "cr") + s(sleep_z,
## k = 5, bs = "cr") + icv
## <environment: 0x55895c125240>
##
## Parametric coefficients:
## Estimate Std. Error t value Pr(>|t|)
## (Intercept) 896.1686 8.7617 102.282 < 2e-16 ***
## sexmale 16.2695 1.8846 8.633 < 2e-16 ***
```

```

## siteousAvanto 201.9051    23.0072    8.776 < 2e-16 ***
## siteousPrisma  34.5885    17.5391    1.972  0.0486 *
## siteousSkyra  366.4358    13.5550    27.033 < 2e-16 ***
## siteUCAM      -89.7385    12.0883   -7.424 1.17e-13 ***
## siteUKB       -13.3478     8.6607   -1.541  0.1233
## siteUmU       283.6285    11.8626    23.909 < 2e-16 ***
## icv           63.3724     0.9707    65.289 < 2e-16 ***
## ---
## Signif. codes:  0 '***' 0.001 '**' 0.01 '*' 0.05 '.' 0.1 ' ' 1
##
## Approximate significance of smooth terms:
##          edf Ref.df      F p-value
## s(age_z)  7.877  7.877 1158.899 <2e-16 ***
## s(sleep_z) 1.000  1.000   0.014  0.907
## ---
## Signif. codes:  0 '***' 0.001 '**' 0.01 '*' 0.05 '.' 0.1 ' ' 1
##
## R-sq.(adj) =  0.471
## lmer.REML = 4.1751e+05  Scale est. = 2868.6    n = 33354

```

Below is the model output with main effect.

```

##
## Family: gaussian
## Link function: identity
##
## Formula:
## value ~ sex + site + s(age_z, k = 10, bs = "cr") + s(sleep_z,
##           k = 5, bs = "cr") + icv + depression
## <environment: 0x555895c125240>
##
## Parametric coefficients:
##              Estimate Std. Error t value Pr(>|t|)
## (Intercept)  898.6620     8.8014 102.104 < 2e-16 ***
## sexmale      16.0252     1.8862   8.496 < 2e-16 ***
## siteousAvanto 203.1304    23.0090   8.828 < 2e-16 ***
## siteousPrisma  35.6586    17.5408   2.033  0.04207 *
## siteousSkyra  367.8310    13.5616  27.123 < 2e-16 ***
## siteUCAM     -89.1712    12.0884  -7.377 1.66e-13 ***
## siteUKB     -14.4307     8.6674  -1.665  0.09594 .
## siteUmU      290.8900    12.1146  24.011 < 2e-16 ***
## icv          63.3940     0.9706  65.317 < 2e-16 ***
## depression  -19.6724     6.6789  -2.945  0.00323 **
## ---
## Signif. codes:  0 '***' 0.001 '**' 0.01 '*' 0.05 '.' 0.1 ' ' 1
##
## Approximate significance of smooth terms:
##          edf Ref.df      F p-value
## s(age_z)  7.877  7.877 1148.886 <2e-16 ***
## s(sleep_z) 1.000  1.000   0.008  0.928
## ---
## Signif. codes:  0 '***' 0.001 '**' 0.01 '*' 0.05 '.' 0.1 ' ' 1
##
## R-sq.(adj) =  0.471
## lmer.REML = 4.1749e+05  Scale est. = 2868.3    n = 33354

```



Next is the model with depression-sleep interaction.

```
##
## Family: gaussian
## Link function: identity
##
## Formula:
## value ~ sex + site + s(age_z, k = 10, bs = "cr") + s(sleep_z,
##     k = 5, bs = "cr") + icv + depression + depression:sleep_z
## <environment: 0x55895c125240>
##
## Parametric coefficients:
##              Estimate Std. Error t value Pr(>|t|)
## (Intercept)   898.6614     8.8016 102.102 < 2e-16 ***
## sexmale        16.0145     1.8865   8.489 < 2e-16 ***
## siteousAvanto  203.0555    23.0103   8.825 < 2e-16 ***
## siteousPrisma  35.5880     17.5425   2.029 0.04250 *
## siteousSkyra  367.7589    13.5638  27.113 < 2e-16 ***
## siteUCAM      -89.2462    12.0908  -7.381 1.6e-13 ***
## siteUKB       -14.4267     8.6676  -1.664 0.09603 .
## siteUmU       291.4032    12.2158  23.855 < 2e-16 ***
## icv           63.3952     0.9706  65.317 < 2e-16 ***
## depression    -19.7945     6.6894  -2.959 0.00309 **
## depression:sleep_z -1.5940     4.8795  -0.327 0.74392
## ---
## Signif. codes:  0 '***' 0.001 '**' 0.01 '*' 0.05 '.' 0.1 ' ' 1
##
## Approximate significance of smooth terms:
##              edf Ref.df      F p-value
## s(age_z)     7.875  7.875 1149.08 <2e-16 ***
## s(sleep_z)   1.000  1.000   0.01  0.921
## ---
## Signif. codes:  0 '***' 0.001 '**' 0.01 '*' 0.05 '.' 0.1 ' ' 1
##
## R-sq.(adj) =  0.471
## lmer.REML = 4.1749e+05  Scale est. = 2868.2    n = 33354
```

The plot below shows the sleep-volume curve for the original model and for the model with main effects of SES.

Accumbens-area sleep effect, covariates

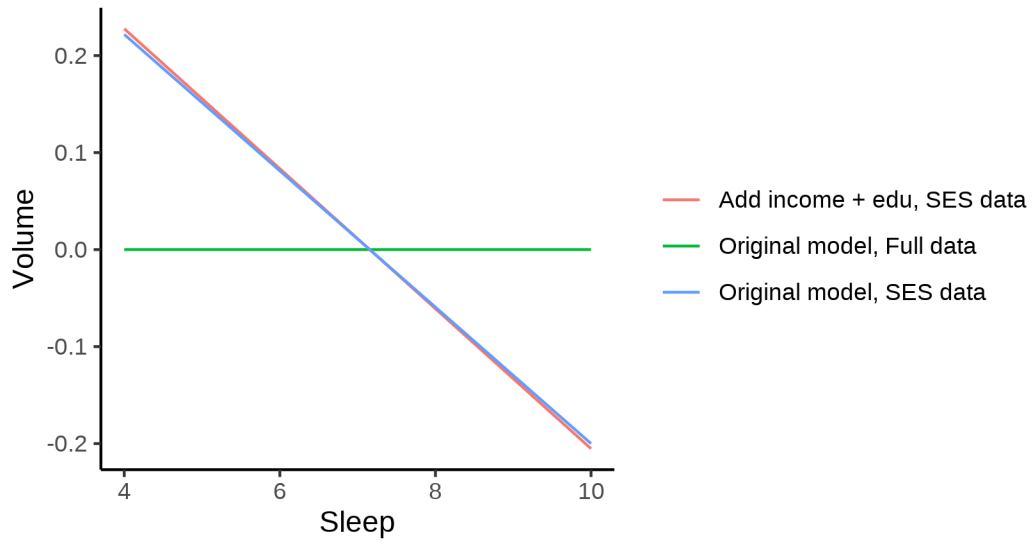

The plot below shows the sleep-volume curve for the original model and for the model with main effects of BMI.

Accumbens-area sleep effect, covariates

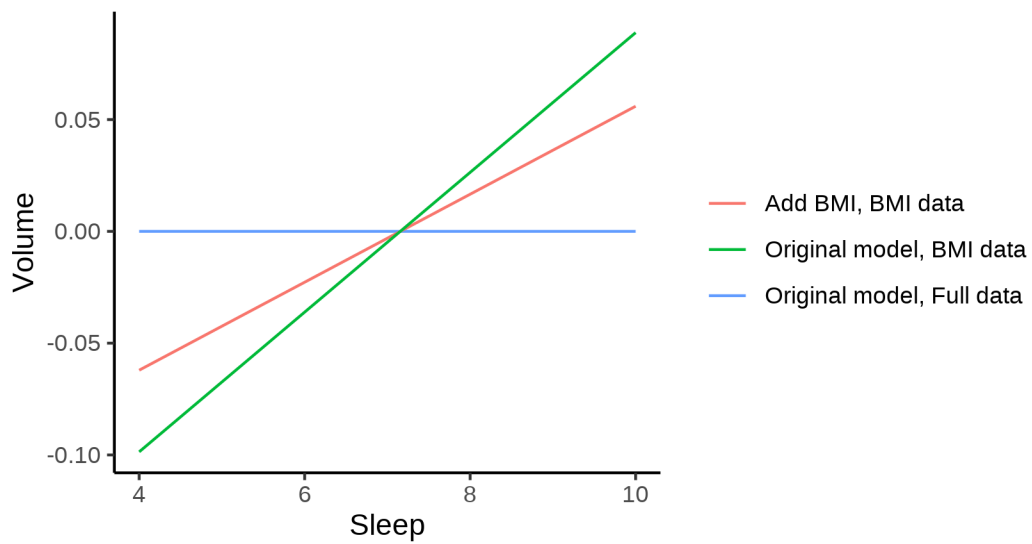

The plot below shows the sleep-volume curve for the original model and for the model with main effects of depression.

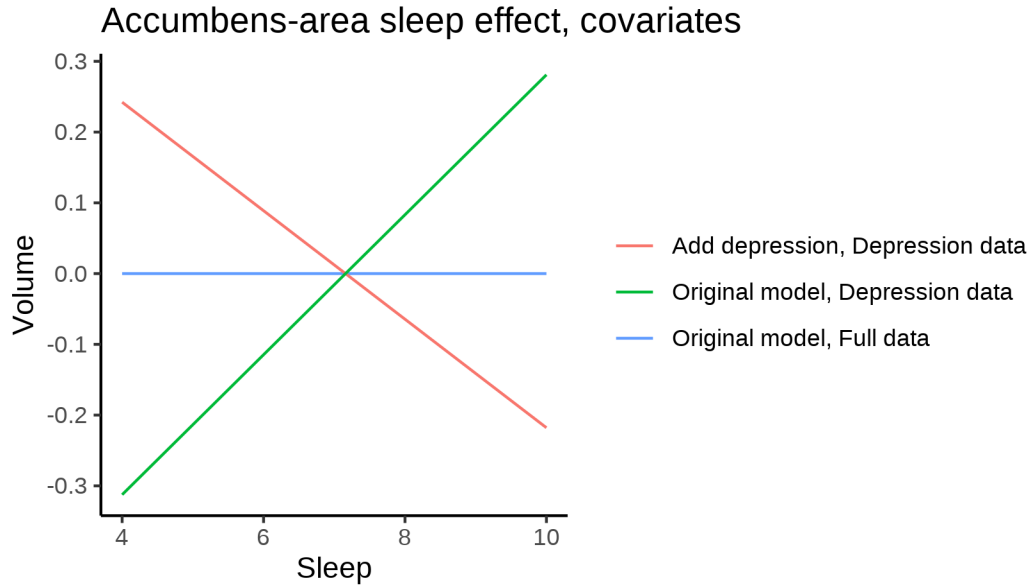

## Models Not controlling for ICV

### Model outputs

Model without sleep term

```
##
## Family: gaussian
## Link function: identity
##
## Formula:
## value ~ sex + site + s(age_z, k = 10, bs = "cr")
## <environment: 0x558963cc0500>
##
## Parametric coefficients:
##              Estimate Std. Error t value Pr(>|t|)
## (Intercept)   773.606     8.179  94.585 < 2e-16 ***
## sexmale        87.321     1.341  65.138 < 2e-16 ***
## siteMPIB      -3.296    10.168  -0.324  0.7458
## siteousAvanto 265.157     8.640  30.688 < 2e-16 ***
## siteousPrisma 110.575    14.379   7.690 1.50e-14 ***
## siteousSkyra  411.381     7.848  52.422 < 2e-16 ***
## siteUB        45.689    23.584   1.937  0.0527 .
## siteUCAM       6.989     8.928   0.783  0.4337
## siteUKB       82.731     8.408   9.840 < 2e-16 ***
## siteUmU       344.760    11.503  29.970 < 2e-16 ***
## siteUOXF      44.497     9.880   4.504 6.68e-06 ***
## ---
## Signif. codes:  0 '***' 0.001 '**' 0.01 '*' 0.05 '.' 0.1 ' ' 1
##
## Approximate significance of smooth terms:
##              edf Ref.df   F p-value
## s(age_z)    7.81   7.81 1939 <2e-16 ***
```

```
## ---
## Signif. codes:  0 '***' 0.001 '**' 0.01 '*' 0.05 '.' 0.1 ' ' 1
##
## R-sq.(adj) =  0.403
## lmer.REML = 6.4972e+05  Scale est. = 2940.8    n = 51284
```

Model with only main effects of age and sleep

```
##
## Family: gaussian
## Link function: identity
##
## Formula:
## value ~ sex + site + s(age_z, k = 10, bs = "cr") + s(sleep_z,
##       k = 5, bs = "cr")
## <environment: 0x558963cc0500>
```

```
## Parametric coefficients:
##           Estimate Std. Error t value Pr(>|t|)
## (Intercept)   774.946     8.187  94.654 < 2e-16 ***
## sexmale        87.148     1.341  64.985 < 2e-16 ***
## siteMPIB      -3.925    10.172  -0.386  0.6996
## siteousAvanto 264.233     8.642  30.574 < 2e-16 ***
## siteousPrisma 109.984    14.377   7.650 2.05e-14 ***
## siteousSkyra  410.433     7.850  52.286 < 2e-16 ***
## siteUB         45.881    23.580   1.946  0.0517 .
## siteUCAM       6.585     8.928   0.738  0.4608
## siteUKB        81.409     8.416   9.673 < 2e-16 ***
## siteUmU       343.134    11.529  29.764 < 2e-16 ***
## siteUOXF       43.850     9.879   4.439 9.08e-06 ***
```

```
## ---
## Signif. codes:  0 '***' 0.001 '**' 0.01 '*' 0.05 '.' 0.1 ' ' 1
##
## Approximate significance of smooth terms:
##           edf Ref.df      F p-value
## s(age_z)   7.802  7.802 1930.227 < 2e-16 ***
## s(sleep_z) 2.669  2.669   5.875 0.000697 ***
```

```
## ---
## Signif. codes:  0 '***' 0.001 '**' 0.01 '*' 0.05 '.' 0.1 ' ' 1
##
## R-sq.(adj) =  0.404
## lmer.REML = 6.4971e+05  Scale est. = 2940.8    n = 51284
```

Model with full interaction between age and sleep

```
##
## Family: gaussian
## Link function: identity
##
## Formula:
## value ~ sex + site + t2(age_z, sleep_z, k = c(10, 4), bs = "cr")
## <environment: 0x558963cc0500>
```

```
## Parametric coefficients:
##           Estimate Std. Error t value Pr(>|t|)
## (Intercept)   778.540     8.107  96.036 < 2e-16 ***
```

```

## sexmale      87.250      1.344  64.922 < 2e-16 ***
## siteMPIB     -7.443     10.164 -0.732  0.4640
## siteousAvanto 261.837     8.647  30.281 < 2e-16 ***
## siteousPrisma 107.793    14.404   7.483 7.35e-14 ***
## siteousSkyra  408.062     7.862  51.906 < 2e-16 ***
## siteUB       41.606     23.557   1.766  0.0774 .
## siteUCAM      3.015      8.920   0.338  0.7353
## siteUKB       77.658     8.326   9.327 < 2e-16 ***
## siteUmU      339.591    11.496  29.540 < 2e-16 ***
## siteUOXF      39.858     9.820   4.059 4.94e-05 ***
## ---
## Signif. codes:  0 '***' 0.001 '**' 0.01 '*' 0.05 '.' 0.1 ' ' 1
##
## Approximate significance of smooth terms:
##              edf Ref.df    F p-value
## t2(age_z,sleep_z) 12.58  12.58 255.5 <2e-16 ***
## ---
## Signif. codes:  0 '***' 0.001 '**' 0.01 '*' 0.05 '.' 0.1 ' ' 1
##
## R-sq.(adj) =  0.403
## lmer.REML = 6.4972e+05  Scale est. = 2939.6    n = 51284

```

## Model comparison

`mod_no_sleep` refers to model without sleep term, `mod_no_interaction` refers to model with only main effect of sleep, and `mod_full` refers to model with a full interaction between age and sleep. This is a nested model comparison, and the p-value at a given line refers to comparing the model at the line to the model on the line above. Hence, significance implies that the more complicated model is supported on statistical grounds.

To be even more specific, the p-value on the second row tests whether there is an association between sleep and volume. The p-value on the third row tests whether this association depends on age.

```

## Data: NULL
## Models:
## ml$mod_no_sleep$mer: NULL
## ml$mod_no_interaction$mer: NULL
## ml$mod_full$mer: NULL
##              npar    AIC    BIC  logLik deviance Chisq Df Pr(>Chisq)
## ml$mod_no_sleep$mer      15 649754 649887 -324862   649724
## ml$mod_no_interaction$mer  17 649746 649896 -324856   649712 12.31  2  0.002123 **
## ml$mod_full$mer          19 649758 649926 -324860   649720  0.00  2  1.000000
## ---
## Signif. codes:  0 '***' 0.001 '**' 0.01 '*' 0.05 '.' 0.1 ' ' 1

```

We chose the model based on the likelihood ratio test with 5 % significance level, which was `mod_no_interaction`.

## Lifespan brain trajectory

The trajectory shown is from the chosen model `mod_no_interaction_no_icv`.

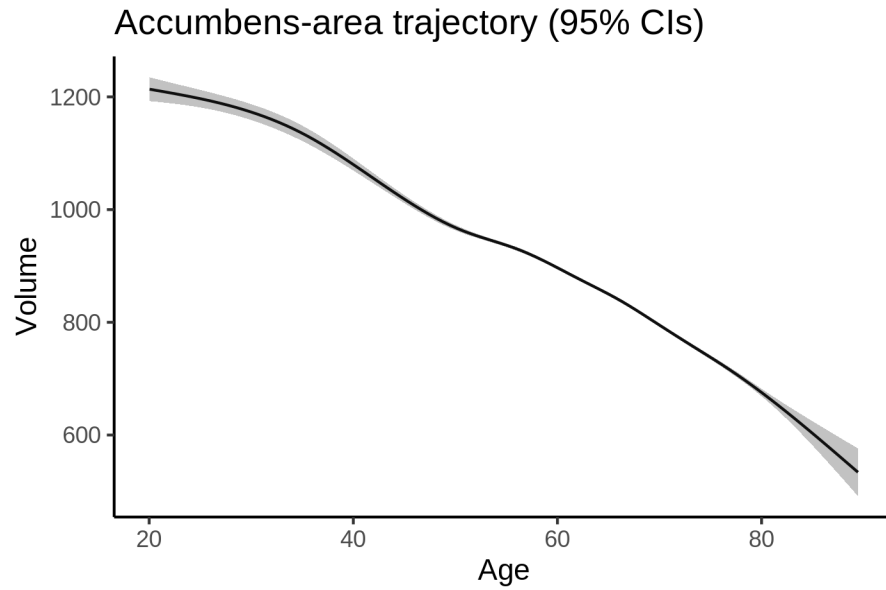

### Effect of sleep

The chosen model only included the main effect of sleep, and hence the effect does not vary with age. The black dot shows the average sleep duration across all ages in the sample.

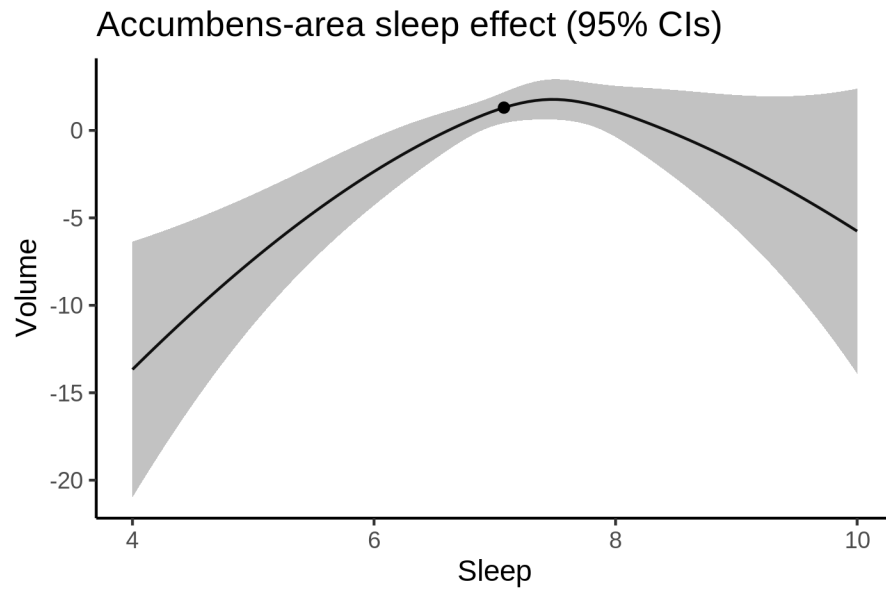

We also show the full interaction model for completeness, although it was not selected.

### Accumbens-area sleep effect (95% CIs)

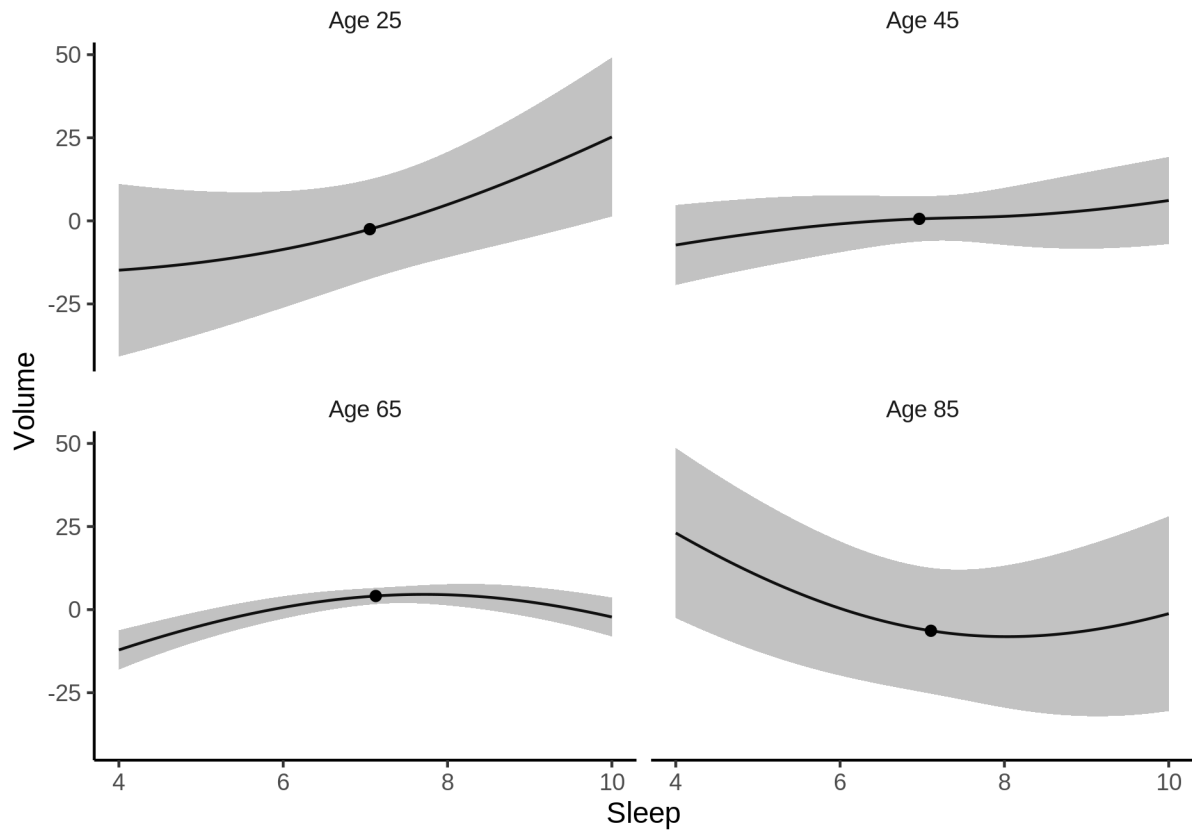

### Deviation from sleep associated with maximal volume

Model with only main effect of sleep was chosen, so we show it for all ages at once. Maximum volume is attained at 7.5 hours of sleep. The percentage values in the plot are calculated as follows: The maximum at 100 % refers to a person at an arbitrary age with a sleep duration associated with maximum volume. For a female, this volume is 924 and for a male it is 1011. The other percentage values show how large the expected volume is for someone with other sleep durations. For example, 99 % implies a 1 % reduction.

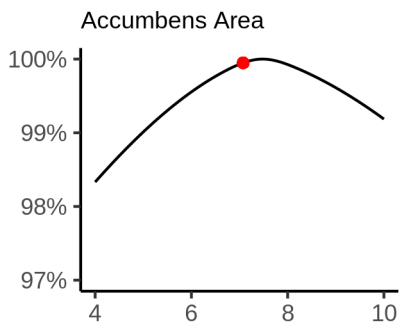

### Comparison of mean sleep and sleep associated with maximum volume

A 95 % confidence interval for the sleep associated with maximum volume is [6.67, 8.48].

The plot below compares average sleep to the sleep associated with maximum volume.

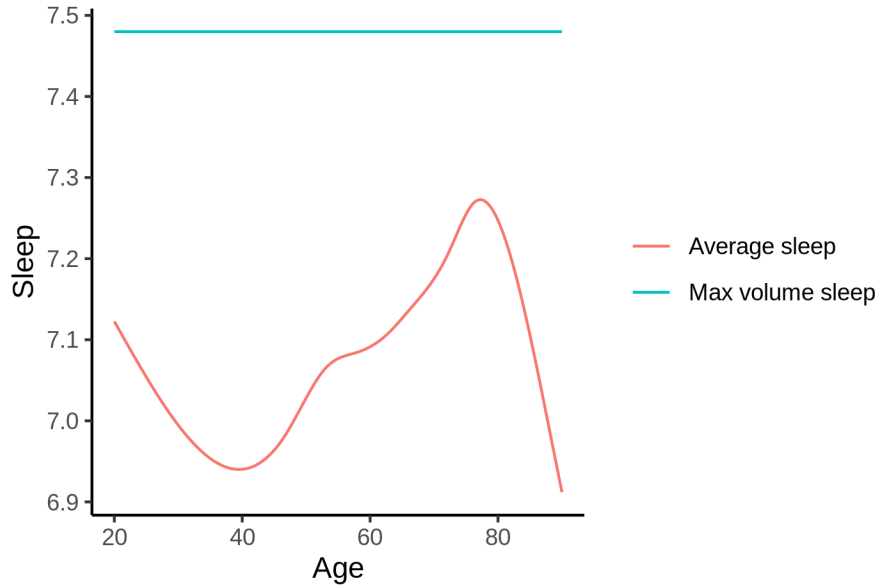

The next plot shows the difference between average sleep and sleep associated with maximum volume. The shaded region is a 95 % confidence interval.

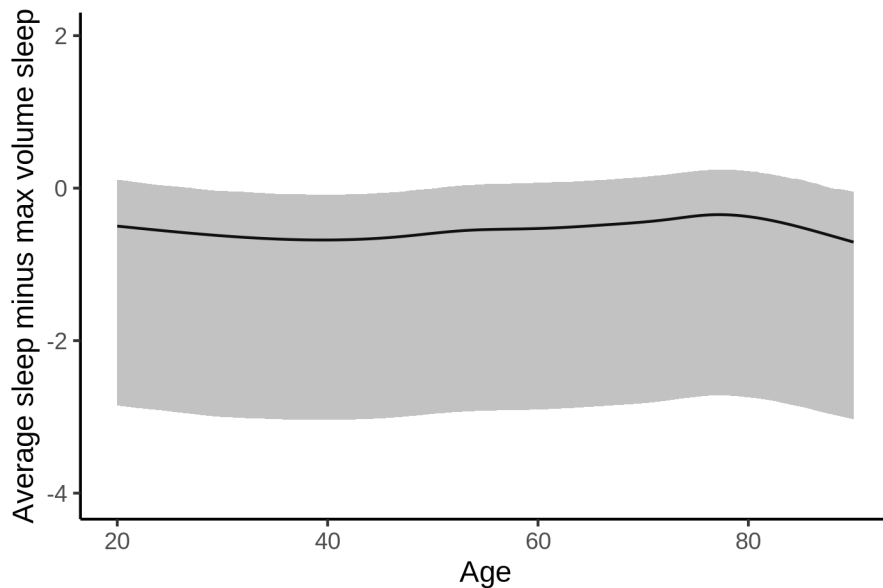

The next plot shows the probability that the sleep duration associated with maximum volume is longer than the average sleep duration, as a function of age. Probability below .05 can be interpreted as evidence that the sleep associated with maximum volume is shorter than the mean sleep, and probability above .95 can be interpreted the opposite way.



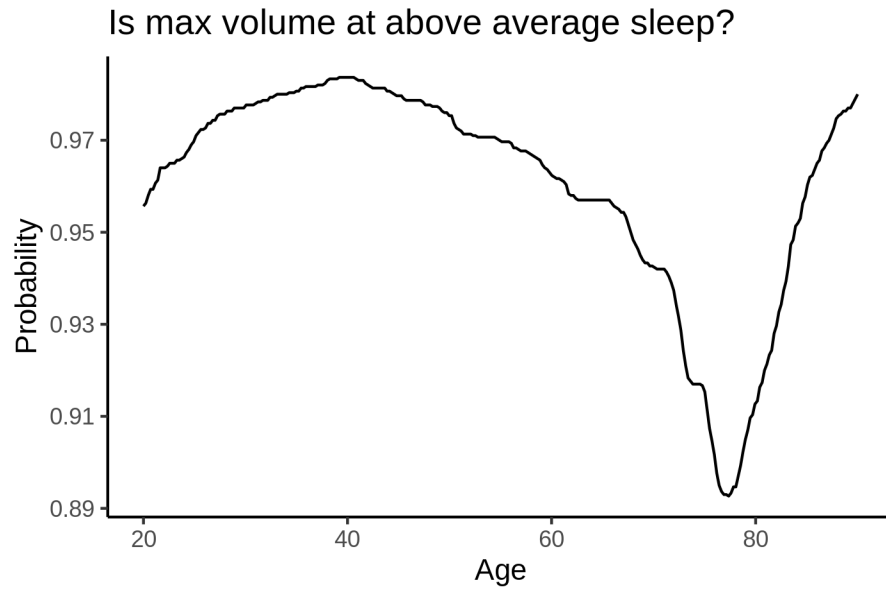

## Amygdala

### Descriptive statistics

| Study | Observations | Unique IDs | Mean age | Age range |
|-------|--------------|------------|----------|-----------|
| HCP   | 974          | 974        | 28.8     | 22 - 37   |
| MPIB  | 677          | 391        | 63.1     | 24 - 83   |
| UB    | 113          | 39         | 70.9     | 64 - 81   |
| UCAM  | 884          | 632        | 55.1     | 20 - 88   |
| UiO   | 1472         | 803        | 49.3     | 20 - 89   |
| UKB   | 45982        | 43138      | 64.5     | 45 - 83   |
| UmU   | 412          | 279        | 62.2     | 25 - 85   |
| UOXF  | 769          | 769        | 69.8     | 60 - 85   |

## Spaghetti plot

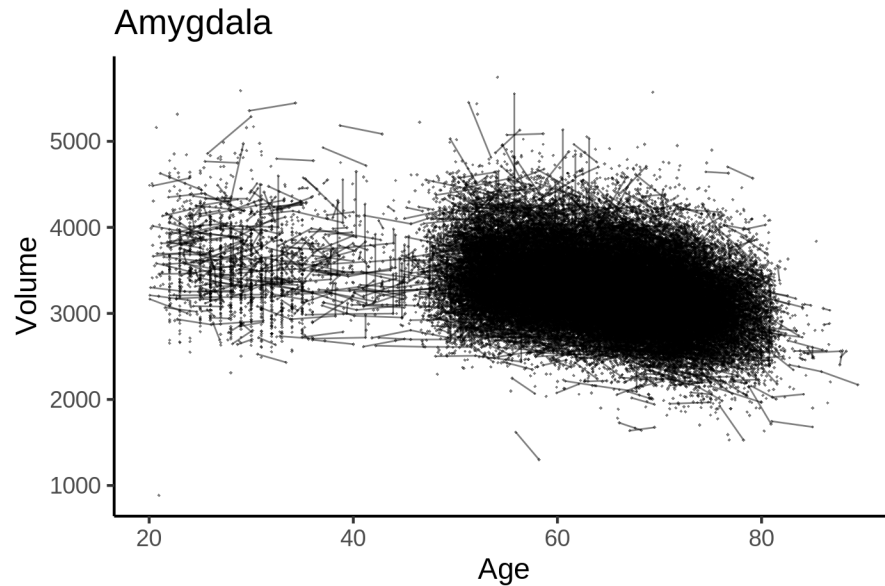

## Models Controlling for ICV

### Model outputs

Model without sleep term

```
##
## Family: gaussian
## Link function: identity
##
## Formula:
## value ~ sex + site + icv + s(age_z, k = 10, bs = "cr")
## <environment: 0x558a46c11a78>
##
## Parametric coefficients:
##              Estimate Std. Error t value Pr(>|t|)
## (Intercept)  3033.328    18.123 167.373 < 2e-16 ***
## sexmale      147.429     3.645  40.442 < 2e-16 ***
## siteMPIB     342.212    22.853  14.974 < 2e-16 ***
## siteousAvanto -101.209    18.892  -5.357 8.49e-08 ***
## siteousPrisma  188.489    31.725   5.941 2.85e-09 ***
## siteousSkyra   508.459    17.451  29.136 < 2e-16 ***
## siteUB        81.508    53.036   1.537  0.1243
## siteUCAM      102.306    19.864   5.150 2.61e-07 ***
## siteUKB       190.359    18.596  10.237 < 2e-16 ***
## siteUmU       161.778    25.640   6.310 2.82e-10 ***
## siteUOXF      45.667    21.912   2.084  0.0372 *
## icv           202.684     1.835 110.473 < 2e-16 ***
## ---
## Signif. codes:  0 '***' 0.001 '**' 0.01 '*' 0.05 '.' 0.1 ' ' 1
##
```

```

## Approximate significance of smooth terms:
##           edf Ref.df      F p-value
## s(age_z) 7.493  7.493 1303 <2e-16 ***
## ---
## Signif. codes:  0 '***' 0.001 '**' 0.01 '*' 0.05 '.' 0.1 ' ' 1
##
## R-sq.(adj) =  0.457
## lmer.REML = 7.311e+05  Scale est. = 11621      n = 51283

Model with only main effects of age and sleep

##
## Family: gaussian
## Link function: identity
##
## Formula:
## value ~ sex + site + icv + s(age_z, k = 10, bs = "cr") + s(sleep_z,
##           k = 5, bs = "cr")
## <environment: 0x558a46c11a78>
##
## Parametric coefficients:
##           Estimate Std. Error t value Pr(>|t|)
## (Intercept) 3031.788    18.141 167.125 < 2e-16 ***
## sexmale      147.375     3.645  40.427 < 2e-16 ***
## siteMPIB     343.882    22.869  15.037 < 2e-16 ***
## siteousAvanto -100.394    18.897  -5.313 1.08e-07 ***
## siteousPrisma 189.034    31.726   5.958 2.56e-09 ***
## siteousSkyra  509.306    17.456  29.176 < 2e-16 ***
## siteUB        82.000    53.034   1.546  0.1221
## siteUCAM     103.109    19.867   5.190 2.11e-07 ***
## siteUKB      191.995    18.615  10.314 < 2e-16 ***
## siteUmU      165.156    25.700   6.426 1.32e-10 ***
## siteUOXF     46.478    21.916   2.121  0.0339 *
## icv          202.791     1.835 110.485 < 2e-16 ***
## ---
## Signif. codes:  0 '***' 0.001 '**' 0.01 '*' 0.05 '.' 0.1 ' ' 1
##
## Approximate significance of smooth terms:
##           edf Ref.df      F p-value
## s(age_z)   7.496  7.496 1294.978 <2e-16 ***
## s(sleep_z) 1.000  1.000   3.633  0.0567 .
## ---
## Signif. codes:  0 '***' 0.001 '**' 0.01 '*' 0.05 '.' 0.1 ' ' 1
##
## R-sq.(adj) =  0.457
## lmer.REML = 7.3109e+05  Scale est. = 11621      n = 51283

Model with full interaction between age and sleep

##
## Family: gaussian
## Link function: identity
##
## Formula:
## value ~ sex + site + icv + t2(age_z, sleep_z, k = c(10, 4), bs = "cr")
## <environment: 0x558a46c11a78>

```

```

##
## Parametric coefficients:
##           Estimate Std. Error t value Pr(>|t|)
## (Intercept) 3034.734    18.219 166.569 < 2e-16 ***
## sexmale      147.468     3.653  40.364 < 2e-16 ***
## siteMPIB     341.058    22.998  14.830 < 2e-16 ***
## siteousAvanto -102.931    18.997  -5.418 6.05e-08 ***
## siteousPrisma 186.332    31.795   5.860 4.64e-09 ***
## siteousSkyra  506.615    17.572  28.830 < 2e-16 ***
## siteUB        79.017    53.073   1.489  0.1365
## siteUCAM      99.982    19.985   5.003 5.67e-07 ***
## siteUKB      188.939    18.694  10.107 < 2e-16 ***
## siteUmU      162.233    25.792   6.290 3.20e-10 ***
## siteUOXF      43.300    22.002   1.968  0.0491 *
## icv          202.701     1.836 110.398 < 2e-16 ***
## ---
## Signif. codes:  0 '***' 0.001 '**' 0.01 '*' 0.05 '.' 0.1 ' ' 1
##
## Approximate significance of smooth terms:
##           edf Ref.df    F p-value
## t2(age_z,sleep_z) 12.86 12.86 29.32 <2e-16 ***
## ---
## Signif. codes:  0 '***' 0.001 '**' 0.01 '*' 0.05 '.' 0.1 ' ' 1
##
## R-sq.(adj) =  0.457
## lmer.REML = 7.311e+05  Scale est. = 11620    n = 51283

```

## Model comparison

mod\_no\_sleep refers to model without sleep term, mod\_no\_interaction refers to model with only main effect of sleep, and mod\_full refers to model with a full interaction between age and sleep. This is a nested model comparison, and the p-value at a given line refers to comparing the model at the line to the model on the line above. Hence, significance implies that the more complicated model is supported on statistical grounds.

To be even more specific, the p-value on the second row tests whether there is an association between sleep and volume. The p-value on the third row tests whether this association depends on age.

```

## Data: NULL
## Models:
## ml$mod_no_sleep$mer: NULL
## ml$mod_no_interaction$mer: NULL
## ml$mod_full$mer: NULL
##           npar    AIC    BIC logLik deviance Chisq Df Pr(>Chisq)
## ml$mod_no_sleep$mer      16 731129 731270 -365548    731097
## ml$mod_no_interaction$mer  18 731129 731288 -365547    731093 3.6326  2    0.1626
## ml$mod_full$mer          20 731141 731317 -365550    731101 0.0000  2    1.0000

```

We chose the model based on the likelihood ratio test with 5 % significance level, which was mod\_no\_sleep.

## Lifespan brain trajectory

The trajectory shown is from the chosen model mod\_no\_sleep.

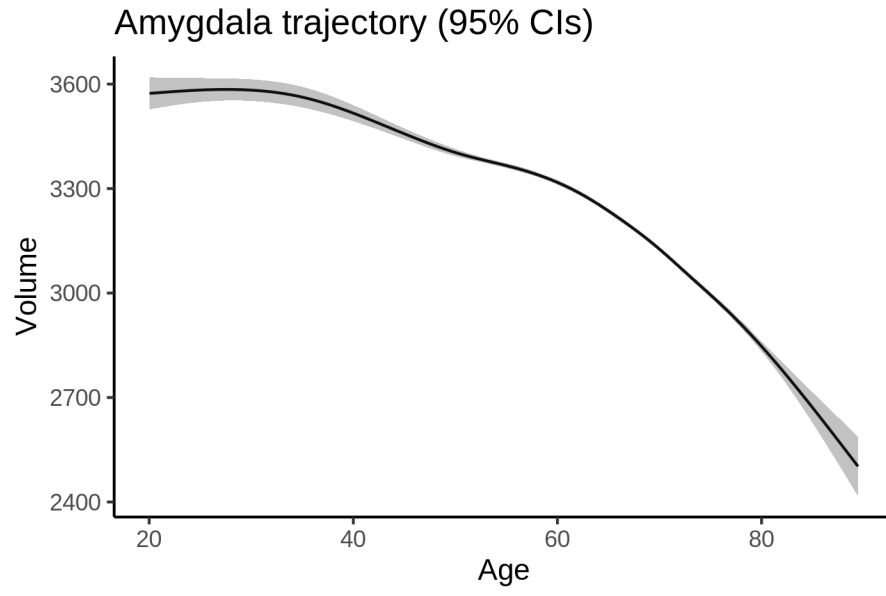

#### Effect of sleep

The chosen model did not include a sleep term, and hence we don't have any estimated effect of sleep.

We show the full interaction model for completeness, although it was not selected.

## Amygdala sleep effect (95% CIs)

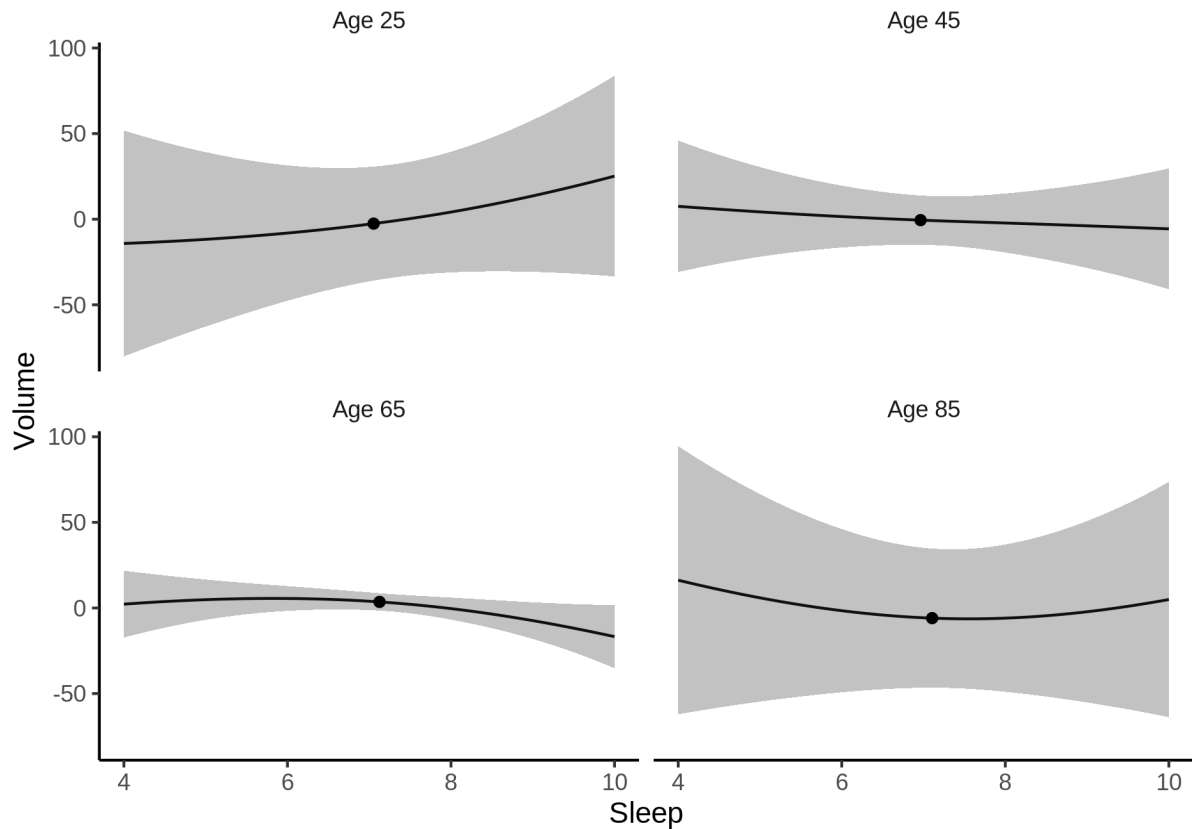

### Deviation from sleep associated with maximal volume

Model with no sleep term was selected. No plots to show. (Although we can of course dig up the plots, which will be pretty flat).

### Comparison of mean sleep and sleep associated with maximum volume

Nothing to show, as we did not find an association between sleep and volume.

### Controlling for covariates

Below is the output for a model in which we only include data with income and education.

```
##
## Family: gaussian
## Link function: identity
##
## Formula:
## value ~ sex + site + s(age_z, k = 10, bs = "cr") + s(sleep_z,
##   k = 5, bs = "cr") + icv
## <environment: 0x558a47c64150>
##
## Parametric coefficients:
```

```

##           Estimate Std. Error t value Pr(>|t|)
## (Intercept)  3402.860    42.153  80.726 < 2e-16 ***
## sexmale      139.850     4.645  30.108 < 2e-16 ***
## siteousAvanto -458.663    52.202  -8.786 < 2e-16 ***
## siteousPrisma -125.733    52.018  -2.417  0.0157 *
## siteousSkyra  146.530    45.568   3.216  0.0013 **
## siteUKB      -182.379    42.083  -4.334  1.47e-05 ***
## siteUOXF     -294.745    47.394  -6.219  5.07e-10 ***
## icv          210.327     2.387  88.121 < 2e-16 ***
## ---
## Signif. codes:  0 '***' 0.001 '**' 0.01 '*' 0.05 '.' 0.1 ' ' 1
##
## Approximate significance of smooth terms:
##           edf Ref.df      F p-value
## s(age_z)    6.126  6.126 855.383 <2e-16 ***
## s(sleep_z)  1.000  1.000   3.973  0.0462 *
## ---
## Signif. codes:  0 '***' 0.001 '**' 0.01 '*' 0.05 '.' 0.1 ' ' 1
##
## R-sq.(adj) =  0.442
## lmer.REML = 4.4478e+05  Scale est. = 12026    n = 31197

```

Below is the output for a model in which we control for the main effects of income and education.

```

##
## Family: gaussian
## Link function: identity
##
## Formula:
## value ~ sex + site + s(age_z, k = 10, bs = "cr") + s(sleep_z,
##           k = 5, bs = "cr") + icv + income_scaled + education_scaled
## <environment: 0x558a47c64150>
##
## Parametric coefficients:
##           Estimate Std. Error t value Pr(>|t|)
## (Intercept)  3402.466    42.426  80.198 < 2e-16 ***
## sexmale      140.395     4.659  30.137 < 2e-16 ***
## siteousAvanto -460.369    52.213  -8.817 < 2e-16 ***
## siteousPrisma -125.966    52.021  -2.421  0.01547 *
## siteousSkyra  144.943    45.580   3.180  0.00147 **
## siteUKB      -184.690    42.109  -4.386  1.16e-05 ***
## siteUOXF     -295.666    47.422  -6.235  4.58e-10 ***
## icv          210.348     2.408  87.356 < 2e-16 ***
## income_scaled   -7.131     5.530  -1.289  0.19725
## education_scaled  7.429     6.534   1.137  0.25557
## ---
## Signif. codes:  0 '***' 0.001 '**' 0.01 '*' 0.05 '.' 0.1 ' ' 1
##
## Approximate significance of smooth terms:
##           edf Ref.df      F p-value
## s(age_z)    6.123  6.123 792.701 <2e-16 ***
## s(sleep_z)  1.000  1.000   4.125  0.0423 *
## ---
## Signif. codes:  0 '***' 0.001 '**' 0.01 '*' 0.05 '.' 0.1 ' ' 1
##

```

```
## R-sq.(adj) = 0.442
## lmer.REML = 4.4477e+05 Scale est. = 12025 n = 31197
```

We also included interaction effects between sleep duration and education and income, in another model. The output is shown below, and the interaction terms are `income_scaled:sleep_z` and `education_scaled:sleep_z`.

```
##
## Family: gaussian
## Link function: identity
##
## Formula:
## value ~ sex + site + s(age_z, k = 10, bs = "cr") + s(sleep_z,
##   k = 5, bs = "cr") + icv + income_scaled + education_scaled +
##   income_scaled:sleep_z + education_scaled:sleep_z
## <environment: 0x558a47c64150>
##
## Parametric coefficients:
##               Estimate Std. Error t value Pr(>|t|)
## (Intercept)    3402.156    42.429  80.185 < 2e-16 ***
## sexmale         140.160     4.662  30.065 < 2e-16 ***
## siteousAvanto  -460.517    52.215  -8.820 < 2e-16 ***
## siteousPrisma  -126.726    52.027  -2.436 0.01487 *
## siteousSkyra   144.770    45.582   3.176 0.00149 **
## siteUKB        -184.310    42.114  -4.376 1.21e-05 ***
## siteUOXF       -294.825    47.436  -6.215 5.19e-10 ***
## icv            210.358     2.408  87.350 < 2e-16 ***
## income_scaled   -6.882     5.533  -1.244 0.21361
## education_scaled 7.311     6.535   1.119 0.26328
## income_scaled:sleep_z -7.959    5.472  -1.454 0.14582
## education_scaled:sleep_z 1.899    6.326   0.300 0.76400
## ---
## Signif. codes:  0 '***' 0.001 '**' 0.01 '*' 0.05 '.' 0.1 ' ' 1
##
## Approximate significance of smooth terms:
##               edf Ref.df      F p-value
## s(age_z)      6.127  6.127 791.504 <2e-16 ***
## s(sleep_z)    1.000  1.000   0.189  0.664
## ---
## Signif. codes:  0 '***' 0.001 '**' 0.01 '*' 0.05 '.' 0.1 ' ' 1
##
## R-sq.(adj) = 0.442
## lmer.REML = 4.4475e+05 Scale est. = 12025 n = 31197
```

We did the same controlling for BMI. Below is the model with no covariates but only keeping data with BMI.

```
##
## Family: gaussian
## Link function: identity
##
## Formula:
## value ~ sex + site + s(age_z, k = 10, bs = "cr") + s(sleep_z,
##   k = 5, bs = "cr") + icv
## <environment: 0x558a477aef48>
##
## Parametric coefficients:
```



```

##           Estimate Std. Error t value Pr(>|t|)
## (Intercept) 2949.354    31.673  93.120 < 2e-16 ***
## sexmale     137.756     4.508  30.558 < 2e-16 ***
## siteousPrisma 287.825    41.029   7.015 2.34e-12 ***
## siteousSkyra 623.686    26.292  23.721 < 2e-16 ***
## siteUCAM     187.890    33.054   5.684 1.32e-08 ***
## siteUKB      274.790    31.899   8.614 < 2e-16 ***
## siteUmU      277.804    36.788   7.552 4.41e-14 ***
## icv          212.295     2.324  91.363 < 2e-16 ***
## ---
## Signif. codes:  0 '***' 0.001 '**' 0.01 '*' 0.05 '.' 0.1 ' ' 1
##
## Approximate significance of smooth terms:
##           edf Ref.df      F p-value
## s(age_z)   6.798  6.798 884.250 <2e-16 ***
## s(sleep_z) 1.000  1.000   3.664  0.0556 .
## ---
## Signif. codes:  0 '***' 0.001 '**' 0.01 '*' 0.05 '.' 0.1 ' ' 1
##
## R-sq.(adj) =  0.456
## lmer.REML = 4.7627e+05  Scale est. = 11299      n = 33441

```

Below is the model output with main effect.

```

##
## Family: gaussian
## Link function: identity
##
## Formula:
## value ~ sex + site + s(age_z, k = 10, bs = "cr") + s(sleep_z,
##           k = 5, bs = "cr") + icv + bmi
## <environment: 0x558a477aef48>
##
## Parametric coefficients:
##           Estimate Std. Error t value Pr(>|t|)
## (Intercept) 2888.4783    33.5410  86.118 < 2e-16 ***
## sexmale     135.8299     4.5195  30.054 < 2e-16 ***
## siteousPrisma 285.2852    41.0214   6.955 3.60e-12 ***
## siteousSkyra 623.3041    26.2915  23.707 < 2e-16 ***
## siteUCAM     186.3332    33.0480   5.638 1.73e-08 ***
## siteUKB      272.9746    31.8951   8.559 < 2e-16 ***
## siteUmU      275.1780    36.7809   7.482 7.53e-14 ***
## icv          211.9529     2.3234  91.227 < 2e-16 ***
## bmi          2.4120     0.4383   5.503 3.75e-08 ***
## ---
## Signif. codes:  0 '***' 0.001 '**' 0.01 '*' 0.05 '.' 0.1 ' ' 1
##
## Approximate significance of smooth terms:
##           edf Ref.df      F p-value
## s(age_z)   6.802  6.802 883.768 <2e-16 ***
## s(sleep_z) 1.000  1.000   2.775  0.0957 .
## ---
## Signif. codes:  0 '***' 0.001 '**' 0.01 '*' 0.05 '.' 0.1 ' ' 1
##
## R-sq.(adj) =  0.457

```

```
## lmer.REML = 4.7624e+05 Scale est. = 11299 n = 33441
```

Next is the model with BMI-sleep interaction.

```
##
## Family: gaussian
## Link function: identity
##
## Formula:
## value ~ sex + site + s(age_z, k = 10, bs = "cr") + s(sleep_z,
## k = 5, bs = "cr") + icv + bmi + bmi:sleep_z
## <environment: 0x558a477aef48>
##
## Parametric coefficients:
## Estimate Std. Error t value Pr(>|t|)
## (Intercept) 2.888e+03 3.356e+01 86.076 < 2e-16 ***
## sexmale 1.358e+02 4.520e+00 30.054 < 2e-16 ***
## siteousPrisma 2.853e+02 4.102e+01 6.955 3.60e-12 ***
## siteousSkyra 6.233e+02 2.629e+01 23.708 < 2e-16 ***
## siteUCAM 1.864e+02 3.305e+01 5.640 1.71e-08 ***
## siteUKB 2.730e+02 3.190e+01 8.560 < 2e-16 ***
## siteUmU 2.752e+02 3.678e+01 7.483 7.45e-14 ***
## icv 2.120e+02 2.323e+00 91.225 < 2e-16 ***
## bmi 2.415e+00 4.385e-01 5.506 3.69e-08 ***
## bmi:sleep_z 7.574e-02 4.150e-01 0.183 0.855
## ---
## Signif. codes: 0 '***' 0.001 '**' 0.01 '*' 0.05 '.' 0.1 ' ' 1
##
## Approximate significance of smooth terms:
## edf Ref.df F p-value
## s(age_z) 6.802 6.802 883.64 <2e-16 ***
## s(sleep_z) 1.000 1.000 0.21 0.647
## ---
## Signif. codes: 0 '***' 0.001 '**' 0.01 '*' 0.05 '.' 0.1 ' ' 1
##
## R-sq.(adj) = 0.457
## lmer.REML = 4.7624e+05 Scale est. = 11299 n = 33441
```

We did the same controlling for depression. Below is the model with no covariates but only keeping data with depression.

```
##
## Family: gaussian
## Link function: identity
##
## Formula:
## value ~ sex + site + s(age_z, k = 10, bs = "cr") + s(sleep_z,
## k = 5, bs = "cr") + icv
## <environment: 0x558a460bdb78>
##
## Parametric coefficients:
## Estimate Std. Error t value Pr(>|t|)
## (Intercept) 3356.346 21.378 156.997 < 2e-16 ***
## sexmale 137.015 4.539 30.184 < 2e-16 ***
## siteousAvanto -406.134 49.620 -8.185 2.82e-16 ***
## siteousPrisma -101.198 41.796 -2.421 0.0155 *
```

```

## siteousSkyra 262.626 32.559 8.066 7.50e-16 ***
## siteUCAM -205.903 29.356 -7.014 2.36e-12 ***
## siteUKB -134.556 21.137 -6.366 1.97e-10 ***
## siteUmU -127.785 28.849 -4.429 9.48e-06 ***
## icv 210.505 2.336 90.107 < 2e-16 ***
## ---
## Signif. codes: 0 '***' 0.001 '**' 0.01 '*' 0.05 '.' 0.1 ' ' 1
##
## Approximate significance of smooth terms:
## edf Ref.df F p-value
## s(age_z) 6.701 6.701 842.666 <2e-16 ***
## s(sleep_z) 1.000 1.000 5.179 0.0229 *
## ---
## Signif. codes: 0 '***' 0.001 '**' 0.01 '*' 0.05 '.' 0.1 ' ' 1
##
## R-sq.(adj) = 0.448
## lmer.REML = 4.7492e+05 Scale est. = 10881 n = 33353

```

Below is the model output with main effect.

```

##
## Family: gaussian
## Link function: identity
##
## Formula:
## value ~ sex + site + s(age_z, k = 10, bs = "cr") + s(sleep_z,
## k = 5, bs = "cr") + icv + depression
## <environment: 0x558a460bdb78>
##
## Parametric coefficients:
## Estimate Std. Error t value Pr(>|t|)
## (Intercept) 3359.404 21.475 156.434 < 2e-16 ***
## sexmale 136.714 4.544 30.089 < 2e-16 ***
## siteousAvanto -404.624 49.630 -8.153 3.68e-16 ***
## siteousPrisma -99.875 41.804 -2.389 0.0169 *
## siteousSkyra 264.328 32.578 8.114 5.07e-16 ***
## siteUCAM -205.203 29.359 -6.989 2.81e-12 ***
## siteUKB -135.881 21.155 -6.423 1.35e-10 ***
## siteUmU -118.856 29.455 -4.035 5.47e-05 ***
## icv 210.531 2.336 90.117 < 2e-16 ***
## depression -24.152 16.096 -1.501 0.1335
## ---
## Signif. codes: 0 '***' 0.001 '**' 0.01 '*' 0.05 '.' 0.1 ' ' 1
##
## Approximate significance of smooth terms:
## edf Ref.df F p-value
## s(age_z) 6.698 6.698 833.761 <2e-16 ***
## s(sleep_z) 1.000 1.000 5.645 0.0175 *
## ---
## Signif. codes: 0 '***' 0.001 '**' 0.01 '*' 0.05 '.' 0.1 ' ' 1
##
## R-sq.(adj) = 0.448
## lmer.REML = 4.7491e+05 Scale est. = 10882 n = 33353

```

Next is the model with depression-sleep interaction.

```

##
## Family: gaussian
## Link function: identity
##
## Formula:
## value ~ sex + site + s(age_z, k = 10, bs = "cr") + s(sleep_z,
##       k = 5, bs = "cr") + icv + depression + depression:sleep_z
## <environment: 0x5558a460bdb78>
##
## Parametric coefficients:
##           Estimate Std. Error t value Pr(>|t|)
## (Intercept)   3359.401     21.475 156.432 < 2e-16 ***
## sexmale         136.692      4.544  30.079 < 2e-16 ***
## siteousAvanto  -404.788     49.633  -8.156 3.60e-16 ***
## siteousPrisma -100.032     41.809  -2.393  0.0167 *
## siteousSkyra   264.171     32.583   8.108 5.34e-16 ***
## siteUCAM      -205.365     29.365  -6.993 2.73e-12 ***
## siteUKB       -135.872     21.156  -6.423 1.36e-10 ***
## siteUmU       -117.801     29.698  -3.967 7.31e-05 ***
## icv            210.534      2.336  90.116 < 2e-16 ***
## depression     -24.402     16.121  -1.514  0.1301
## depression:sleep_z -3.272     11.762  -0.278  0.7809
## ---
## Signif. codes:  0 '***' 0.001 '**' 0.01 '*' 0.05 '.' 0.1 ' ' 1
##
## Approximate significance of smooth terms:
##           edf Ref.df      F p-value
## s(age_z)   6.696  6.696 834.004 <2e-16 ***
## s(sleep_z) 1.000  1.000  3.448  0.0633 .
## ---
## Signif. codes:  0 '***' 0.001 '**' 0.01 '*' 0.05 '.' 0.1 ' ' 1
##
## R-sq.(adj) =  0.448
## lmer.REML = 4.7491e+05  Scale est. = 10882      n = 33353

```

The plot below shows the sleep-volume curve for the original model and for the model with main effects of SES.

### Amygdala sleep effect, covariates

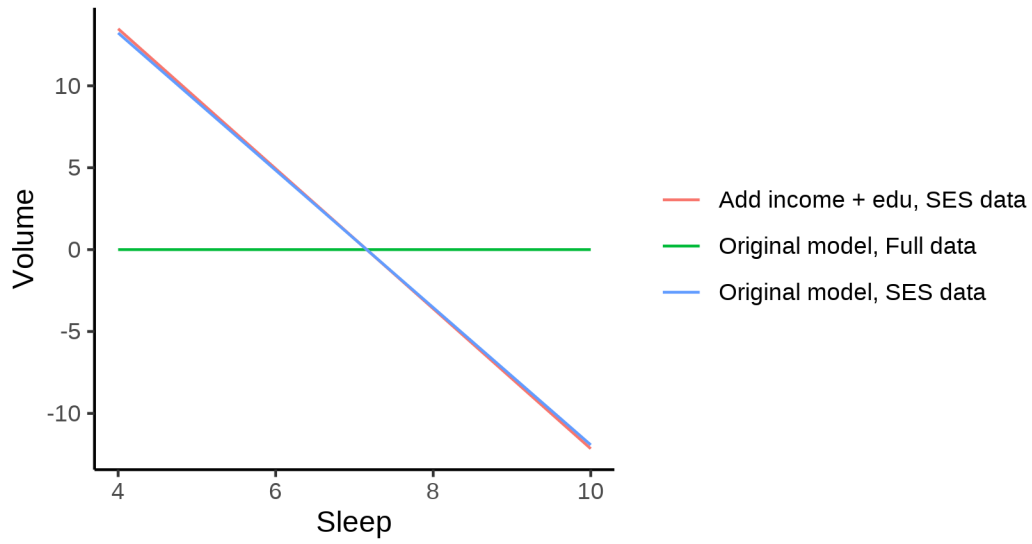

The plot below shows the sleep-volume curve for the original model and for the model with main effects of BMI.

### Amygdala sleep effect, covariates

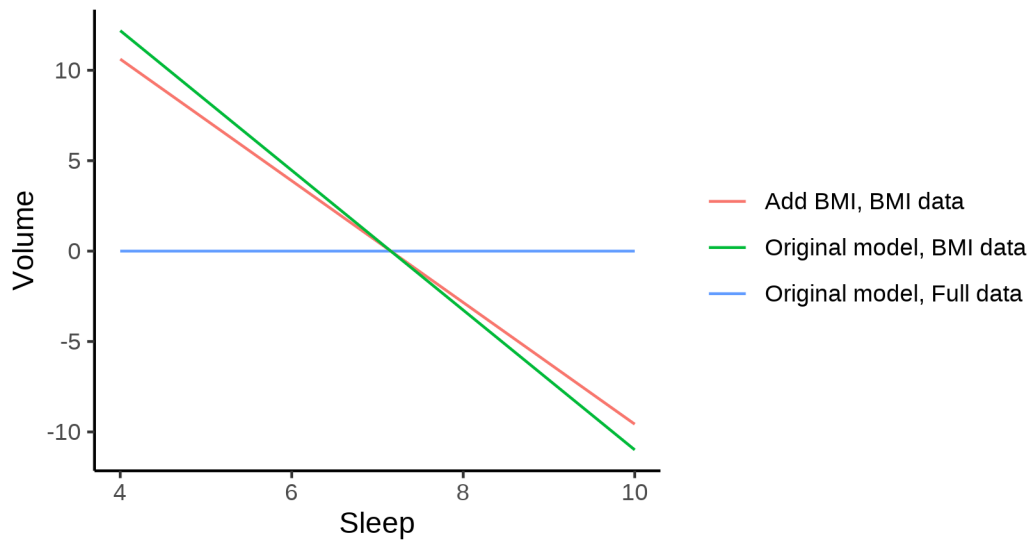

The plot below shows the sleep-volume curve for the original model and for the model with main effects of depression.

## Amygdala sleep effect, covariates

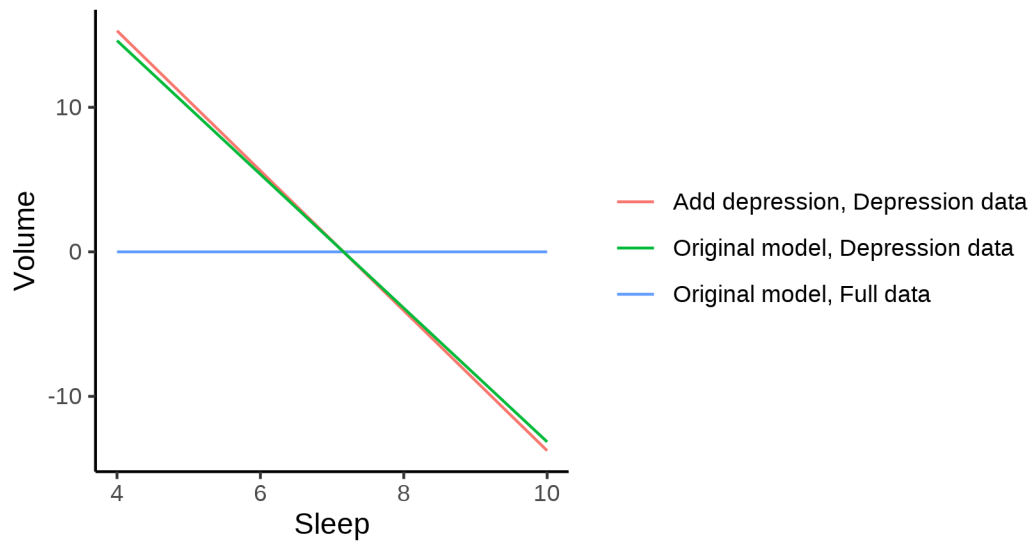

## Models Not controlling for ICV

### Model outputs

Model without sleep term

```
##
## Family: gaussian
## Link function: identity
##
## Formula:
## value ~ sex + site + s(age_z, k = 10, bs = "cr")
## <environment: 0x558adb36df98>
##
## Parametric coefficients:
##              Estimate Std. Error t value Pr(>|t|)
## (Intercept)  2922.189    19.996 146.140 < 2e-16 ***
## sexmale      377.390     3.356 112.436 < 2e-16 ***
## siteMPIB     16.879    25.324  0.667  0.50507
## siteousAvanto -11.356    20.740 -0.548  0.58401
## siteousPrisma 225.766    35.123  6.428 1.30e-10 ***
## siteousSkyra  522.979    19.454 26.883 < 2e-16 ***
## siteUB       21.173    59.737  0.354  0.72301
## siteUCAM     113.525    22.141  5.127 2.95e-07 ***
## siteUKB      196.236    20.543  9.552 < 2e-16 ***
## siteUmU      79.507    28.615  2.779 0.00546 **
## siteUOXF     -1.751    24.312 -0.072 0.94259
## ---
## Signif. codes:  0 '***' 0.001 '**' 0.01 '*' 0.05 '.' 0.1 ' ' 1
##
## Approximate significance of smooth terms:
##              edf Ref.df   F p-value
## s(age_z)    6.795  6.795 1373 <2e-16 ***
```

```
## ---
## Signif. codes:  0 '***' 0.001 '**' 0.01 '*' 0.05 '.' 0.1 ' ' 1
##
## R-sq.(adj) =  0.318
## lmer.REML = 7.4196e+05  Scale est. = 11821      n = 51283
```

Model with only main effects of age and sleep

```
##
## Family: gaussian
## Link function: identity
##
## Formula:
## value ~ sex + site + s(age_z, k = 10, bs = "cr") + s(sleep_z,
##      k = 5, bs = "cr")
## <environment: 0x558adb36df98>
```

```
## Parametric coefficients:
##              Estimate Std. Error t value Pr(>|t|)
## (Intercept)  2924.680    20.015 146.125 < 2e-16 ***
## sexmale      376.926     3.358 112.252 < 2e-16 ***
## siteMPIB     16.319     25.334   0.644  0.51947
## siteousAvanto -13.174    20.744  -0.635  0.52539
## siteousPrisma 224.457    35.119   6.391 1.66e-10 ***
## siteousSkyra  521.067    19.459  26.778 < 2e-16 ***
## siteUB       22.213    59.726   0.372  0.70995
## siteUCAM     113.249    22.141   5.115 3.15e-07 ***
## siteUKB      193.840    20.562   9.427 < 2e-16 ***
## siteUmU      77.714    28.676   2.710 0.00673 **
## siteUOXF     -2.816    24.310  -0.116 0.90778
```

```
## ---
## Signif. codes:  0 '***' 0.001 '**' 0.01 '*' 0.05 '.' 0.1 ' ' 1
##
```

```
## Approximate significance of smooth terms:
##              edf Ref.df      F p-value
## s(age_z)     6.784  6.784 1361.89 < 2e-16 ***
## s(sleep_z)   2.945  2.945   5.76 0.000779 ***
```

```
## ---
## Signif. codes:  0 '***' 0.001 '**' 0.01 '*' 0.05 '.' 0.1 ' ' 1
##
```

```
## R-sq.(adj) =  0.318
## lmer.REML = 7.4195e+05  Scale est. = 11821      n = 51283
```

Model with full interaction between age and sleep

```
##
## Family: gaussian
## Link function: identity
##
## Formula:
## value ~ sex + site + t2(age_z, sleep_z, k = c(10, 4), bs = "cr")
## <environment: 0x558adb36df98>
```

```
## Parametric coefficients:
##              Estimate Std. Error t value Pr(>|t|)
## (Intercept)  2926.587    20.045 146.003 < 2e-16 ***
```

```

## sexmale          377.422      3.365 112.171 < 2e-16 ***
## siteMPIB         11.945     25.438  0.470 0.63867
## siteousAvanto   -14.814     20.836 -0.711 0.47711
## siteousPrisma   221.806     35.190  6.303 2.94e-10 ***
## siteousSkyra    519.150     19.564 26.536 < 2e-16 ***
## siteUB          17.479     59.747  0.293 0.76987
## siteUCAM        109.066     22.235  4.905 9.36e-07 ***
## siteUKB         191.738     20.587  9.313 < 2e-16 ***
## siteUmU         74.459     28.735  2.591 0.00957 **
## siteUOXF        -6.238     24.358 -0.256 0.79789
## ---
## Signif. codes:  0 '***' 0.001 '**' 0.01 '*' 0.05 '.' 0.1 ' ' 1
##
## Approximate significance of smooth terms:
##                edf Ref.df    F p-value
## t2(age_z,sleep_z) 11.71  11.71 45.58 <2e-16 ***
## ---
## Signif. codes:  0 '***' 0.001 '**' 0.01 '*' 0.05 '.' 0.1 ' ' 1
##
## R-sq.(adj) =  0.318
## lmer.REML = 7.4195e+05  Scale est. = 11821    n = 51283

```

## Model comparison

`mod_no_sleep` refers to model without sleep term, `mod_no_interaction` refers to model with only main effect of sleep, and `mod_full` refers to model with a full interaction between age and sleep. This is a nested model comparison, and the p-value at a given line refers to comparing the model at the line to the model on the line above. Hence, significance implies that the more complicated model is supported on statistical grounds.

To be even more specific, the p-value on the second row tests whether there is an association between sleep and volume. The p-value on the third row tests whether this association depends on age.

```

## Data: NULL
## Models:
## ml$mod_no_sleep$mer: NULL
## ml$mod_no_interaction$mer: NULL
## ml$mod_full$mer: NULL
##
##                npar    AIC    BIC logLik deviance  Chisq Df Pr(>Chisq)
## ml$mod_no_sleep$mer      15 741990 742123 -370980   741960
## ml$mod_no_interaction$mer  17 741982 742133 -370974   741948 11.6152  2  0.003005 **
## ml$mod_full$mer          19 741985 742153 -370974   741947  0.9682  2  0.616263
## ---
## Signif. codes:  0 '***' 0.001 '**' 0.01 '*' 0.05 '.' 0.1 ' ' 1

```

We chose the model based on the likelihood ratio test with 5 % significance level, which was `mod_no_interaction`.

## Lifespan brain trajectory

The trajectory shown is from the chosen model `mod_no_interaction_no_icv`.



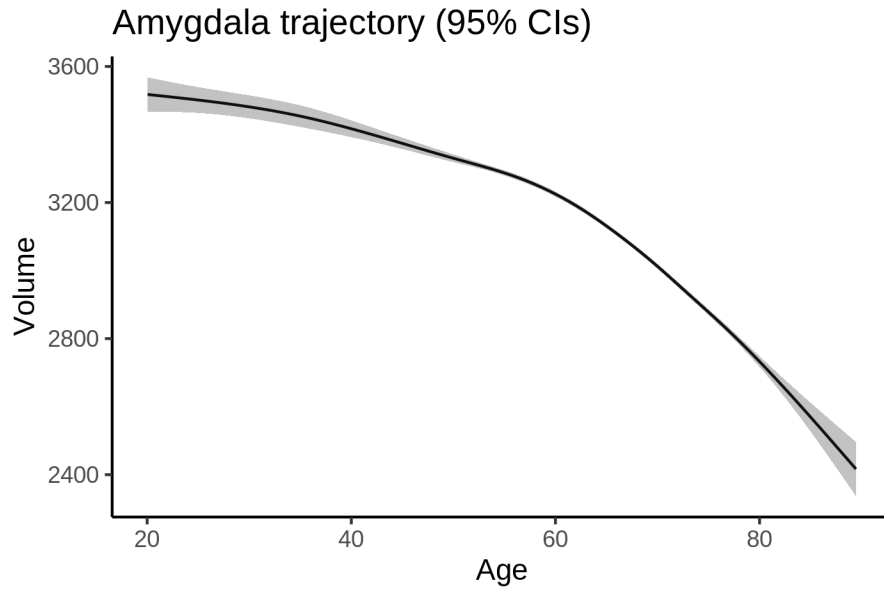

### Effect of sleep

The chosen model only included the main effect of sleep, and hence the effect does not vary with age. The black dot shows the average sleep duration across all ages in the sample.

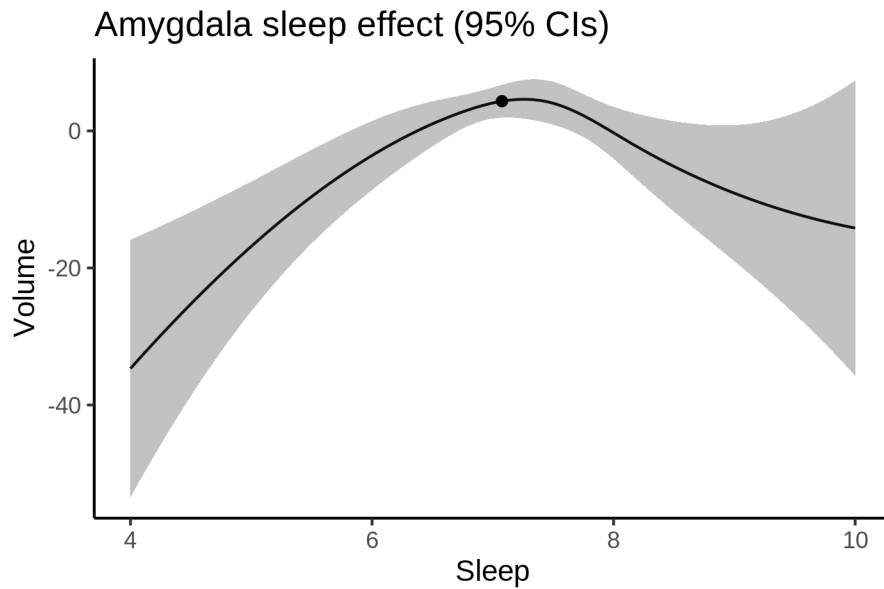

We also show the full interaction model for completeness, although it was not selected.

### Amygdala sleep effect (95% CIs)

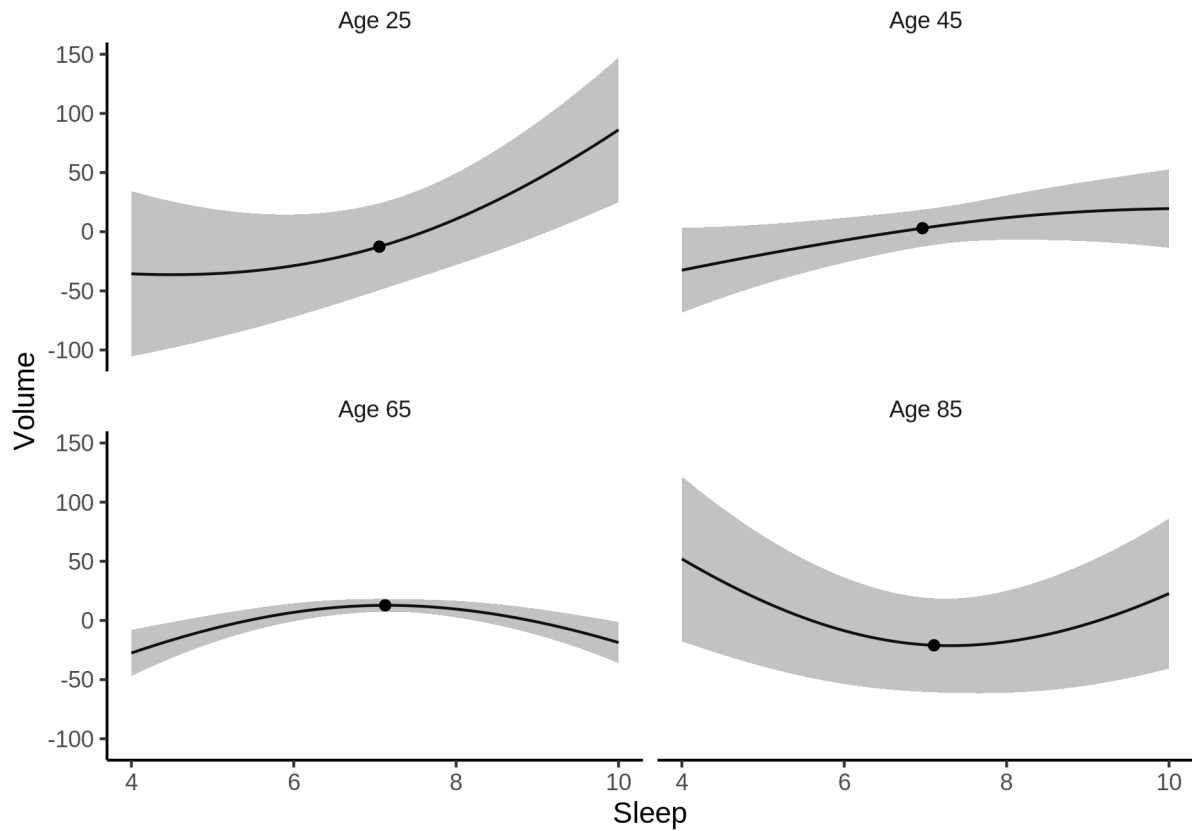

### Deviation from sleep associated with maximal volume

Model with only main effect of sleep was chosen, so we show it for all ages at once. Maximum volume is attained at 7.3 hours of sleep. The percentage values in the plot are calculated as follows: The maximum at 100 % refers to a person at an arbitrary age with a sleep duration associated with maximum volume. For a female, this volume is 3166 and for a male it is 3543. The other percentage values show how large the expected volume is for someone with other sleep durations. For example, 99 % implies a 1 % reduction.

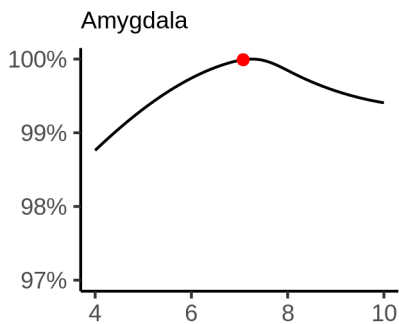

### Comparison of mean sleep and sleep associated with maximum volume

A 95 % confidence interval for the sleep associated with maximum volume is [6.85, 10].

The plot below compares average sleep to the sleep associated with maximum volume.

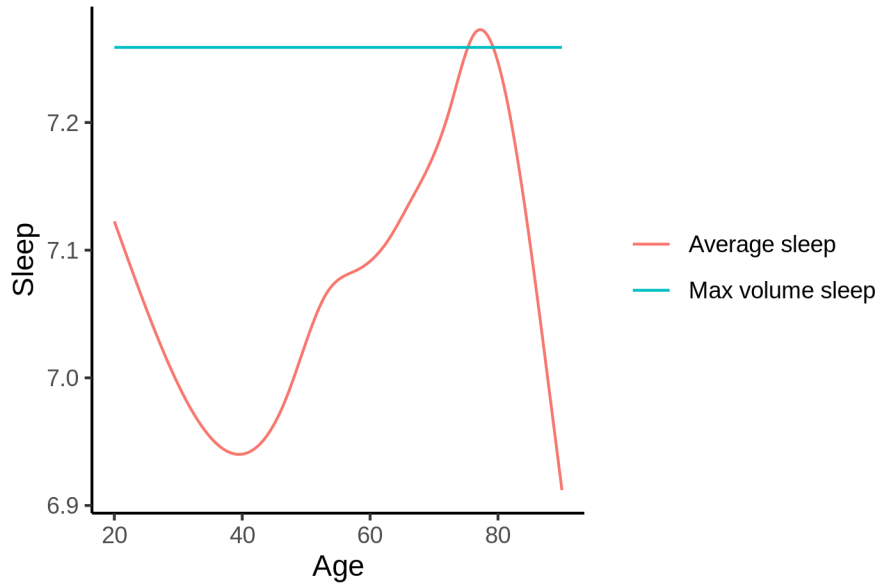

The next plot shows the difference between average sleep and sleep associated with maximum volume. The shaded region is a 95 % confidence interval.

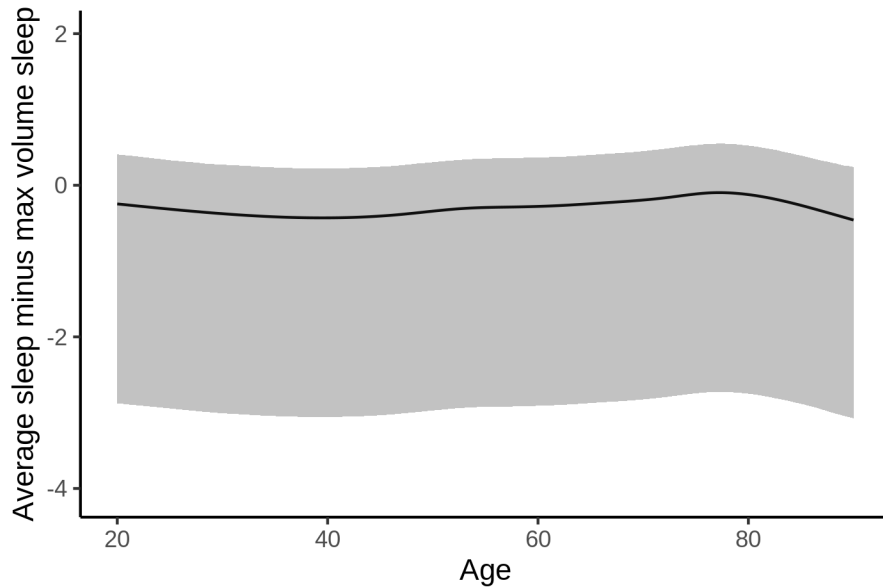

The next plot shows the probability that the sleep duration associated with maximum volume is longer than the average sleep duration, as a function of age. Probability below .05 can be interpreted as evidence that the sleep associated with maximum volume is shorter than the mean sleep, and probability above .95 can be interpreted the opposite way.

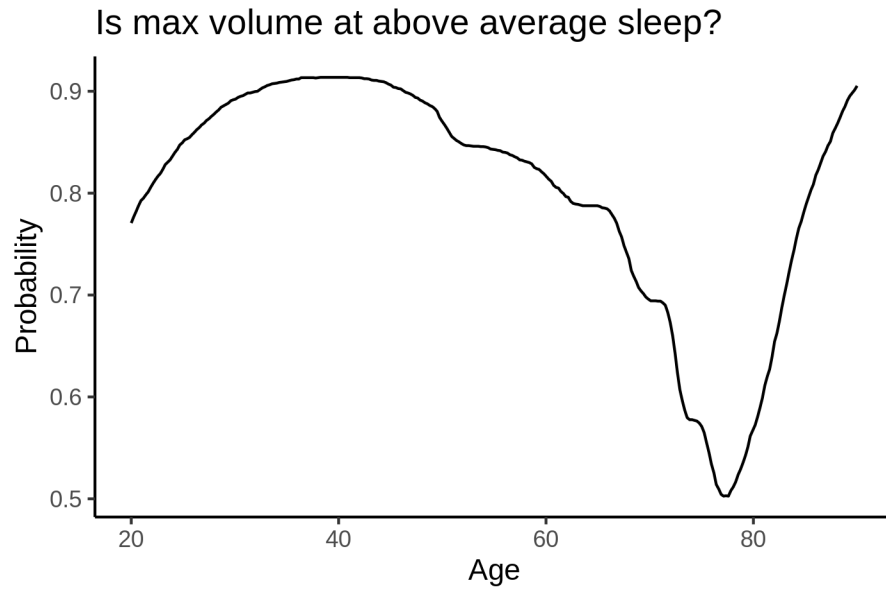

## Brain-Stem

### Descriptive statistics

| Study | Observations | Unique IDs | Mean age | Age range |
|-------|--------------|------------|----------|-----------|
| HCP   | 974          | 974        | 28.8     | 22 - 37   |
| MPIB  | 677          | 391        | 63.1     | 24 - 83   |
| UB    | 113          | 39         | 70.9     | 64 - 81   |
| UCAM  | 884          | 632        | 55.1     | 20 - 88   |
| UiO   | 1474         | 803        | 49.3     | 20 - 88   |
| UKB   | 45963        | 43127      | 64.5     | 45 - 83   |
| UmU   | 412          | 279        | 62.2     | 25 - 85   |
| UOXF  | 769          | 769        | 69.8     | 60 - 85   |

## Spaghetti plot

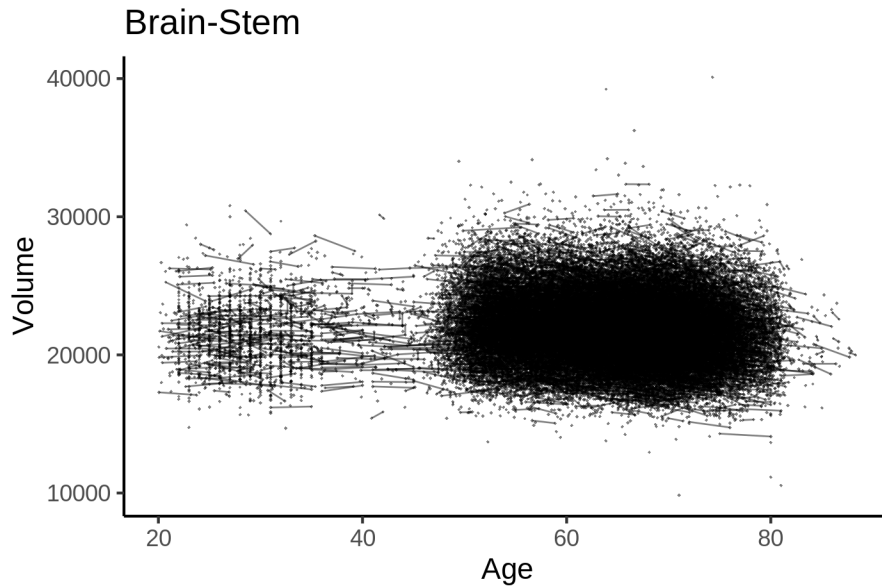

## Models Controlling for ICV

### Model outputs

Model without sleep term

```
##
## Family: gaussian
## Link function: identity
##
## Formula:
## value ~ sex + site + icv + s(age_z, k = 10, bs = "cr")
## <environment: 0x5589630b6ab8>
##
## Parametric coefficients:
##              Estimate Std. Error t value Pr(>|t|)
## (Intercept)  20854.571    93.022  224.191 < 2e-16 ***
## sexmale      797.839     20.273   39.355 < 2e-16 ***
## siteMPIB     2478.732    124.147  19.966 < 2e-16 ***
## siteousAvanto  -8.274     96.082  -0.086 0.93138
## siteousPrisma  255.398    158.133   1.615 0.10630
## siteousSkyra   669.272     94.265   7.100 1.26e-12 ***
## siteUB       -295.703    299.758  -0.986 0.32391
## siteUCAM     -118.871    106.878  -1.112 0.26605
## siteUKB       747.541     95.171   7.855 4.09e-15 ***
## siteUmU     -1560.356    138.989 -11.226 < 2e-16 ***
## siteUOXF      314.785    115.166   2.733 0.00627 **
## icv          1481.073     10.144 146.008 < 2e-16 ***
## ---
## Signif. codes:  0 '***' 0.001 '**' 0.01 '*' 0.05 '.' 0.1 ' ' 1
##
```

```

## Approximate significance of smooth terms:
##           edf Ref.df      F p-value
## s(age_z) 6.779  6.779 129.5 <2e-16 ***
## ---
## Signif. codes:  0 '***' 0.001 '**' 0.01 '*' 0.05 '.' 0.1 ' ' 1
##
## R-sq.(adj) =  0.486
## lmer.REML = 9.0169e+05  Scale est. = 1.0143e+05  n = 51266

Model with only main effects of age and sleep

##
## Family: gaussian
## Link function: identity
##
## Formula:
## value ~ sex + site + icv + s(age_z, k = 10, bs = "cr") + s(sleep_z,
##           k = 5, bs = "cr")
## <environment: 0x5589630b6ab8>
##
## Parametric coefficients:
##           Estimate Std. Error t value Pr(>|t|)
## (Intercept) 20846.75      93.09 223.946 < 2e-16 ***
## sexmale      797.25       20.27  39.339 < 2e-16 ***
## siteMPIB     2496.24     124.17  20.103 < 2e-16 ***
## siteousAvanto  -5.36       96.08  -0.056  0.9555
## siteousPrisma 257.07     158.10   1.626  0.1040
## siteousSkyra  670.88       94.27   7.117 1.12e-12 ***
## siteUB       -284.42     299.63  -0.949  0.3425
## siteUCAM     -109.80     106.85  -1.028  0.3041
## siteUKB       755.87       95.25   7.936 2.13e-15 ***
## siteUmU      -1518.94     139.25 -10.908 < 2e-16 ***
## siteUOXF      318.32     115.14   2.765  0.0057 **
## icv          1480.70      10.15 145.865 < 2e-16 ***
## ---
## Signif. codes:  0 '***' 0.001 '**' 0.01 '*' 0.05 '.' 0.1 ' ' 1
##
## Approximate significance of smooth terms:
##           edf Ref.df      F p-value
## s(age_z)   6.774  6.774 124.362 < 2e-16 ***
## s(sleep_z) 3.579  3.579   9.923 1.64e-07 ***
## ---
## Signif. codes:  0 '***' 0.001 '**' 0.01 '*' 0.05 '.' 0.1 ' ' 1
##
## R-sq.(adj) =  0.487
## lmer.REML = 9.0166e+05  Scale est. = 1.015e+05  n = 51266

Model with full interaction between age and sleep

##
## Family: gaussian
## Link function: identity
##
## Formula:
## value ~ sex + site + icv + t2(age_z, sleep_z, k = c(10, 4), bs = "cr")
## <environment: 0x5589630b6ab8>

```

```

##
## Parametric coefficients:
##           Estimate Std. Error t value Pr(>|t|)
## (Intercept) 20822.86    92.63 224.797 < 2e-16 ***
## sexmale      796.46     20.31  39.222 < 2e-16 ***
## siteMPIB     2517.89   124.32  20.253 < 2e-16 ***
## siteousAvanto  15.23     96.37   0.158  0.87446
## siteousPrisma 276.12    158.42   1.743  0.08135 .
## siteousSkyra  694.07     94.57   7.339 2.18e-13 ***
## siteUB       -270.91   299.56  -0.904  0.36582
## siteUCAM     -91.77    106.94  -0.858  0.39084
## siteUKB       780.82     94.73   8.242 < 2e-16 ***
## siteUmU      -1501.23   139.13 -10.790 < 2e-16 ***
## siteUOXF      340.22    114.89   2.961  0.00307 **
## icv          1481.79    10.15 146.036 < 2e-16 ***
## ---
## Signif. codes:  0 '***' 0.001 '**' 0.01 '*' 0.05 '.' 0.1 ' ' 1
##
## Approximate significance of smooth terms:
##           edf Ref.df    F p-value
## t2(age_z,sleep_z) 10.97 10.97 14.77 <2e-16 ***
## ---
## Signif. codes:  0 '***' 0.001 '**' 0.01 '*' 0.05 '.' 0.1 ' ' 1
##
## R-sq.(adj) = 0.487
## lmer.REML = 9.0167e+05 Scale est. = 1.0149e+05 n = 51266

```

## Model comparison

mod\_no\_sleep refers to model without sleep term, mod\_no\_interaction refers to model with only main effect of sleep, and mod\_full refers to model with a full interaction between age and sleep. This is a nested model comparison, and the p-value at a given line refers to comparing the model at the line to the model on the line above. Hence, significance implies that the more complicated model is supported on statistical grounds.

To be even more specific, the p-value on the second row tests whether there is an association between sleep and volume. The p-value on the third row tests whether this association depends on age.

```

## Data: NULL
## Models:
## ml$mod_no_sleep$mer: NULL
## ml$mod_no_interaction$mer: NULL
## ml$mod_full$mer: NULL
##           npar    AIC    BIC logLik deviance Chisq Df Pr(>Chisq)
## ml$mod_no_sleep$mer      16 901725 901866 -450846    901693
## ml$mod_no_interaction$mer  18 901699 901858 -450831    901663 29.727  2  3.506e-07 ***
## ml$mod_full$mer          20 901707 901884 -450833    901667  0.000  2      1
## ---
## Signif. codes:  0 '***' 0.001 '**' 0.01 '*' 0.05 '.' 0.1 ' ' 1

```

We chose the model based on the likelihood ratio test with 5 % significance level, which was mod\_no\_interaction.

### Lifespan brain trajectory

The trajectory shown is from the chosen model `mod_no_interaction`.

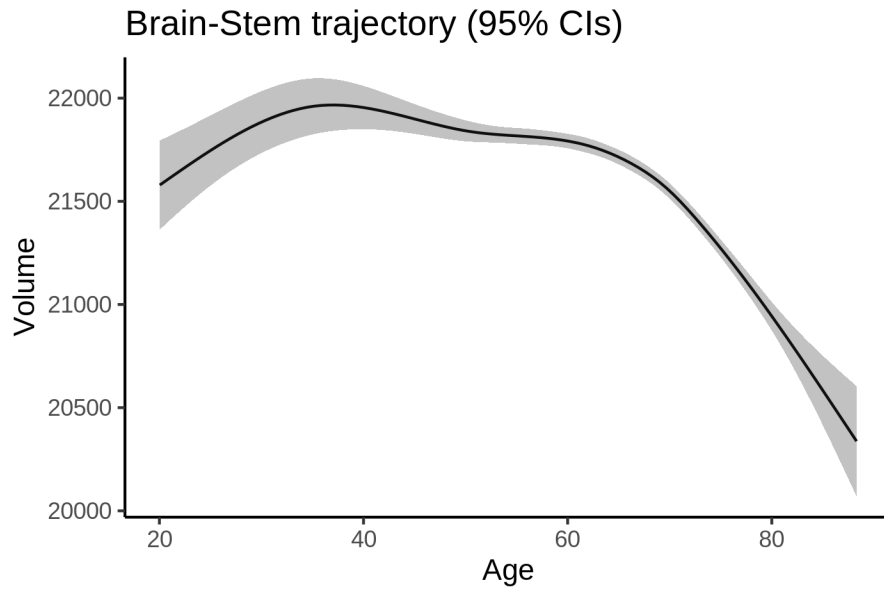

### Effect of sleep

The chosen model only included the main effect of sleep, and hence the effect does not vary with age. The black dot shows the average sleep duration across all ages in the sample.

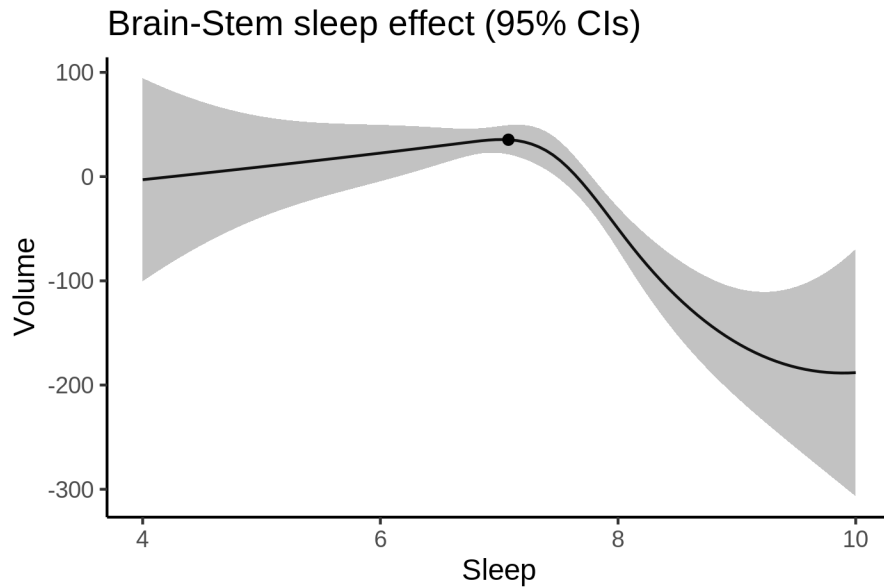

We also show the full interaction model for completeness, although it was not selected.



### Brain-Stem sleep effect (95% CIs)

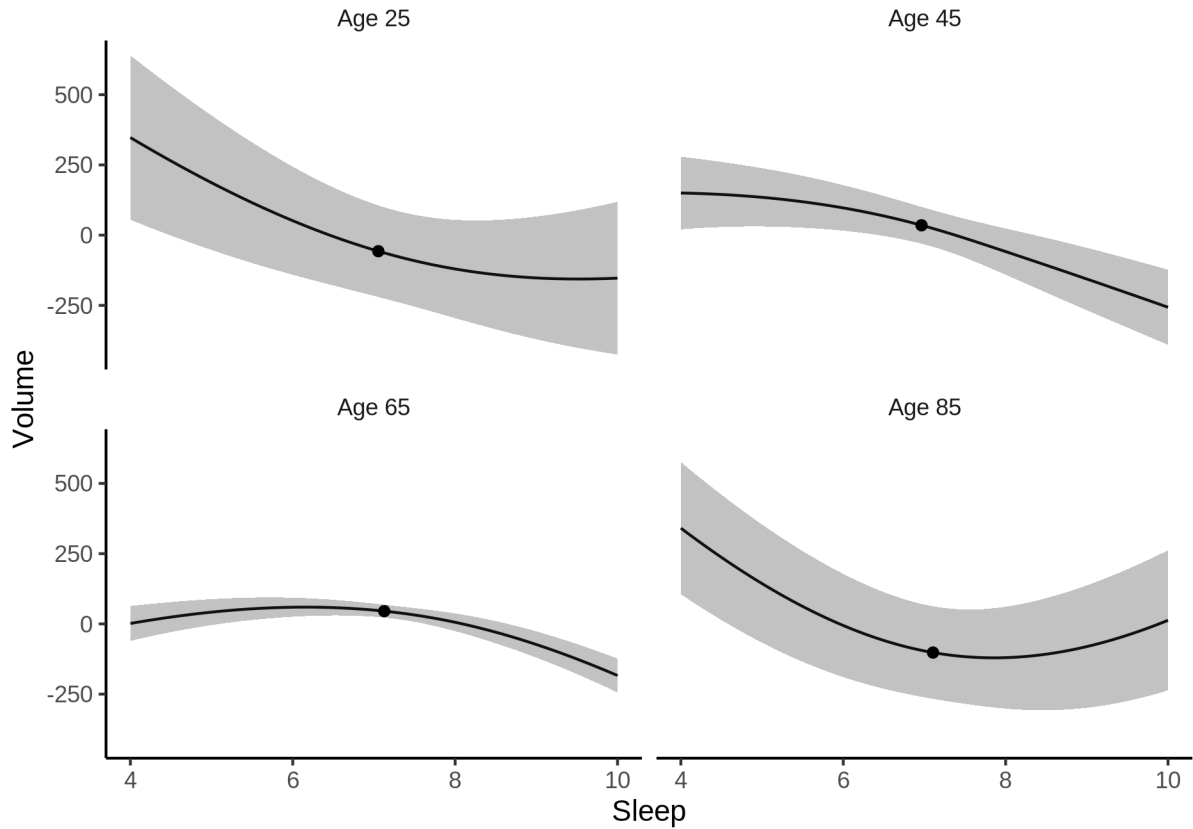

### Deviation from sleep associated with maximal volume

Model with only main effect of sleep was chosen, so we show it for all ages at once. Maximum volume is attained at 7 hours of sleep. The percentage values in the plot are calculated as follows: The maximum at 100 % refers to a person at an arbitrary age with a sleep duration associated with maximum volume. For a female, this volume is 21555 and for a male it is 22352. The other percentage values show how large the expected volume is for someone with other sleep durations. For example, 99 % implies a 1 % reduction.

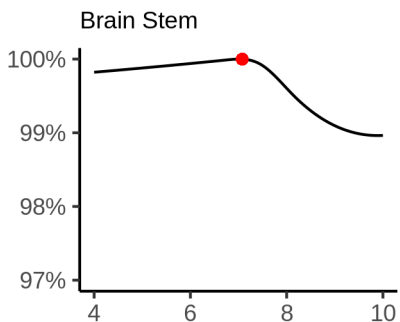

### Comparison of mean sleep and sleep associated with maximum volume

A 95 % confidence interval for the sleep associated with maximum volume is [4, 7.21].

The plot below compares average sleep to the sleep associated with maximum volume.

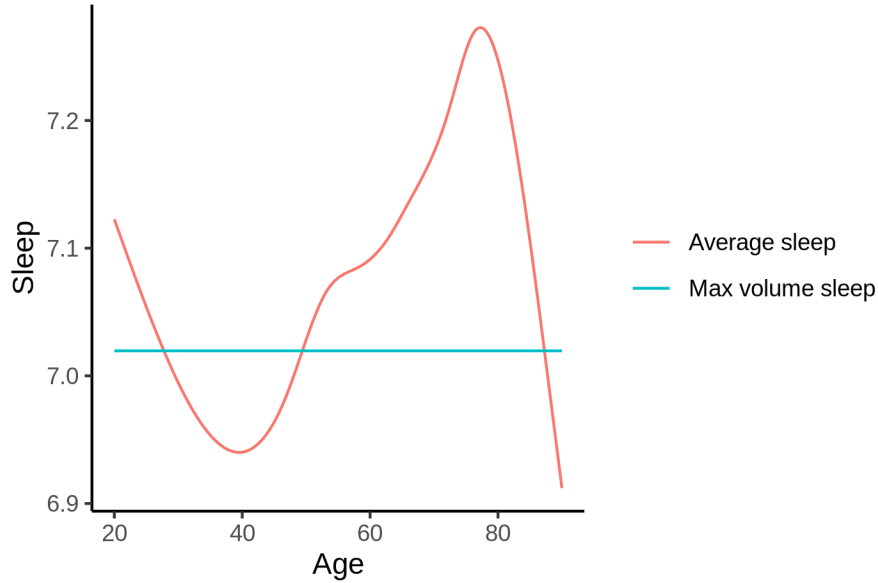

The next plot shows the difference between average sleep and sleep associated with maximum volume. The shaded region is a 95 % confidence interval.

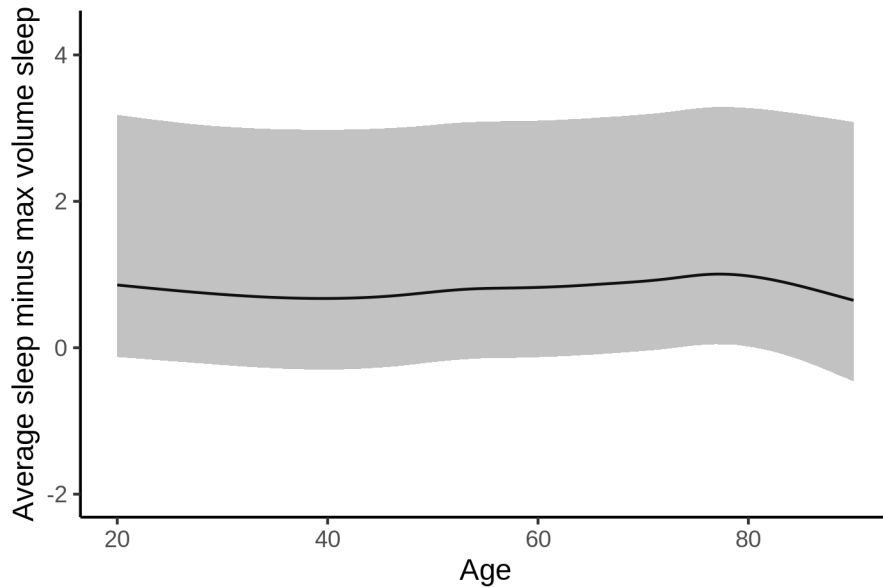

The next plot shows the probability that the sleep duration associated with maximum volume is longer than the average sleep duration, as a function of age. Probability below .05 can be interpreted as evidence that the sleep associated with maximum volume is shorter than the mean sleep, and probability above .95 can be interpreted the opposite way.

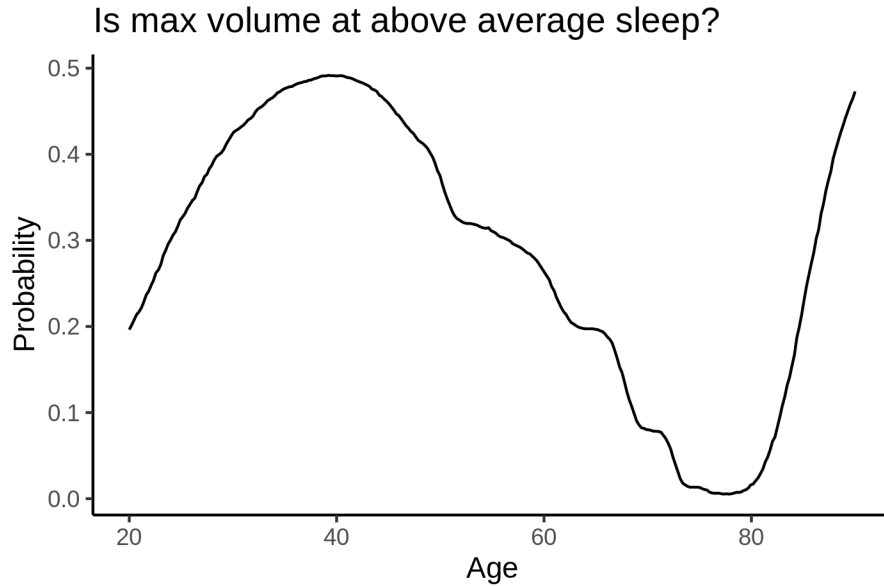

## Controlling for covariates

Below is the output for a model in which we only include data with income and education.

```
##
## Family: gaussian
## Link function: identity
##
## Formula:
## value ~ sex + site + s(age_z, k = 10, bs = "cr") + s(sleep_z,
##   k = 5, bs = "cr") + icv
## <environment: 0x55895b00c6b0>
##
## Parametric coefficients:
##               Estimate Std. Error t value Pr(>|t|)
## (Intercept)  23651.71    235.72  100.339 < 2e-16 ***
## sexmale       745.12      25.82   28.856 < 2e-16 ***
## siteousAvanto -3029.84    268.46  -11.286 < 2e-16 ***
## siteousPrisma -2324.03    284.19   -8.178 3.00e-16 ***
## siteousSkyra  -2235.92    254.91   -8.772 < 2e-16 ***
## siteUKB       -2024.86    235.21   -8.609 < 2e-16 ***
## siteUOXF      -2140.69    264.66   -8.088 6.26e-16 ***
## icv           1557.91     13.21  117.978 < 2e-16 ***
## ---
## Signif. codes:  0 '***' 0.001 '**' 0.01 '*' 0.05 '.' 0.1 ' ' 1
##
## Approximate significance of smooth terms:
##               edf Ref.df      F p-value
## s(age_z)      6.340  6.340 54.431 < 2e-16 ***
## s(sleep_z)    3.126  3.126  8.593 7.44e-06 ***
## ---
## Signif. codes:  0 '***' 0.001 '**' 0.01 '*' 0.05 '.' 0.1 ' ' 1
##
```

```
## R-sq.(adj) = 0.489
## lmer.REML = 5.4865e+05 Scale est. = 1.0298e+05 n = 31180
```

Below is the output for a model in which we control for the main effects of income and education.

```
##
## Family: gaussian
## Link function: identity
##
## Formula:
## value ~ sex + site + s(age_z, k = 10, bs = "cr") + s(sleep_z,
##     k = 5, bs = "cr") + icv + income_scaled + education_scaled
## <environment: 0x55895b00c6b0>
##
## Parametric coefficients:
##           Estimate Std. Error t value Pr(>|t|)
## (Intercept) 23423.16   236.97  98.845 < 2e-16 ***
## sexmale      745.41     25.86  28.823 < 2e-16 ***
## siteousAvanto -3025.99   268.24 -11.281 < 2e-16 ***
## siteousPrisma -2339.71   283.89  -8.242 < 2e-16 ***
## siteousSkyra  -2237.19   254.66  -8.785 < 2e-16 ***
## siteUKB      -2025.90   235.14  -8.616 < 2e-16 ***
## siteUOXF     -2069.35   264.54  -7.822 5.35e-15 ***
## icv          1543.44    13.30 116.082 < 2e-16 ***
## income_scaled  154.01     30.72   5.014 5.36e-07 ***
## education_scaled 200.91     36.41   5.518 3.46e-08 ***
## ---
## Signif. codes:  0 '***' 0.001 '**' 0.01 '*' 0.05 '.' 0.1 ' ' 1
##
## Approximate significance of smooth terms:
##           edf Ref.df      F p-value
## s(age_z)   6.485  6.485 43.182 < 2e-16 ***
## s(sleep_z) 2.866  2.866  7.319 0.000102 ***
## ---
## Signif. codes:  0 '***' 0.001 '**' 0.01 '*' 0.05 '.' 0.1 ' ' 1
##
## R-sq.(adj) = 0.49
## lmer.REML = 5.4856e+05 Scale est. = 1.0308e+05 n = 31180
```

We also included interaction effects between sleep duration and education and income, in another model. The output is shown below, and the interaction terms are `income_scaled:sleep_z` and `education_scaled:sleep_z`.

```
##
## Family: gaussian
## Link function: identity
##
## Formula:
## value ~ sex + site + s(age_z, k = 10, bs = "cr") + s(sleep_z,
##     k = 5, bs = "cr") + icv + income_scaled + education_scaled +
##     income_scaled:sleep_z + education_scaled:sleep_z
## <environment: 0x55895b00c6b0>
##
## Parametric coefficients:
##           Estimate Std. Error t value Pr(>|t|)
## (Intercept) 23425.11   236.98  98.848 < 2e-16 ***
```

```

## sexmale          743.13      25.88  28.717 < 2e-16 ***
## siteousAvanto    -3030.57    268.24 -11.298 < 2e-16 ***
## siteousPrisma    -2348.82    283.90  -8.273 < 2e-16 ***
## siteousSkyra     -2241.56    254.65  -8.802 < 2e-16 ***
## siteUKB          -2028.05    235.16  -8.624 < 2e-16 ***
## siteUOXF         -2070.95    264.61  -7.826 5.18e-15 ***
## icv              1543.75     13.30 116.102 < 2e-16 ***
## income_scaled    156.23      30.73   5.084 3.72e-07 ***
## education_scaled 199.45      36.42   5.477 4.36e-08 ***
## income_scaled:sleep_z -62.14     30.71  -2.024 0.0430 *
## education_scaled:sleep_z 60.43     35.34   1.710 0.0873 .
## ---
## Signif. codes:  0 '***' 0.001 '**' 0.01 '*' 0.05 '.' 0.1 ' ' 1
##
## Approximate significance of smooth terms:
##          edf Ref.df      F p-value
## s(age_z)  6.498  6.498 42.990 < 2e-16 ***
## s(sleep_z) 2.850  2.850  4.669 0.00385 **
## ---
## Signif. codes:  0 '***' 0.001 '**' 0.01 '*' 0.05 '.' 0.1 ' ' 1
##
## R-sq.(adj) =  0.49
## lmer.REML = 5.4853e+05  Scale est. = 1.0307e+05  n = 31180

```

We did the same controlling for BMI. Below is the model with no covariates but only keeping data with BMI.

```

##
## Family: gaussian
## Link function: identity
##
## Formula:
## value ~ sex + site + s(age_z, k = 10, bs = "cr") + s(sleep_z,
##           k = 5, bs = "cr") + icv
## <environment: 0x558ad6ffe670>
##
## Parametric coefficients:
##              Estimate Std. Error t value Pr(>|t|)
## (Intercept)  20970.70    129.46 161.986 < 2e-16 ***
## sexmale      732.00      25.06  29.215 < 2e-16 ***
## siteousPrisma 259.72     171.31   1.516   0.13
## siteousSkyra 759.64      81.02   9.375 < 2e-16 ***
## siteUCAM     -152.42     140.96  -1.081   0.28
## siteUKB       658.14     130.96   5.025 5.05e-07 ***
## siteUmU      -1464.17    167.22  -8.756 < 2e-16 ***
## icv          1561.97     12.85 121.525 < 2e-16 ***
## ---
## Signif. codes:  0 '***' 0.001 '**' 0.01 '*' 0.05 '.' 0.1 ' ' 1
##
## Approximate significance of smooth terms:
##          edf Ref.df      F p-value
## s(age_z)  6.261  6.261 69.073 < 2e-16 ***
## s(sleep_z) 2.762  2.762  8.828 3.7e-05 ***
## ---
## Signif. codes:  0 '***' 0.001 '**' 0.01 '*' 0.05 '.' 0.1 ' ' 1
##

```

```
## R-sq.(adj) = 0.496
## lmer.REML = 5.8743e+05 Scale est. = 99310 n = 33424
```

Below is the model output with main effect.

```
##
## Family: gaussian
## Link function: identity
##
## Formula:
## value ~ sex + site + s(age_z, k = 10, bs = "cr") + s(sleep_z,
## k = 5, bs = "cr") + icv + bmi
## <environment: 0x558ad6ffe670>
##
## Parametric coefficients:
## Estimate Std. Error t value Pr(>|t|)
## (Intercept) 21424.611 143.309 149.500 < 2e-16 ***
## sexmale 746.400 25.110 29.725 < 2e-16 ***
## siteousPrisma 271.762 171.247 1.587 0.113
## siteousSkyra 760.386 81.026 9.384 < 2e-16 ***
## siteUCAM -142.537 140.892 -1.012 0.312
## siteUKB 673.668 130.931 5.145 2.69e-07 ***
## siteUmU -1444.849 167.143 -8.644 < 2e-16 ***
## icv 1564.756 12.847 121.798 < 2e-16 ***
## bmi -18.054 2.447 -7.377 1.66e-13 ***
## ---
## Signif. codes: 0 '***' 0.001 '**' 0.01 '*' 0.05 '.' 0.1 ' ' 1
##
## Approximate significance of smooth terms:
## edf Ref.df F p-value
## s(age_z) 6.281 6.281 69.935 < 2e-16 ***
## s(sleep_z) 2.613 2.613 9.489 3.26e-05 ***
## ---
## Signif. codes: 0 '***' 0.001 '**' 0.01 '*' 0.05 '.' 0.1 ' ' 1
##
## R-sq.(adj) = 0.496
## lmer.REML = 5.8737e+05 Scale est. = 99316 n = 33424
```

Next is the model with BMI-sleep interaction.

```
##
## Family: gaussian
## Link function: identity
##
## Formula:
## value ~ sex + site + s(age_z, k = 10, bs = "cr") + s(sleep_z,
## k = 5, bs = "cr") + icv + bmi + bmi:sleep_z
## <environment: 0x558ad6ffe670>
##
## Parametric coefficients:
## Estimate Std. Error t value Pr(>|t|)
## (Intercept) 21420.428 143.392 149.383 < 2e-16 ***
## sexmale 746.477 25.110 29.728 < 2e-16 ***
## siteousPrisma 271.737 171.246 1.587 0.113
## siteousSkyra 760.655 81.025 9.388 < 2e-16 ***
## siteUCAM -141.206 140.900 -1.002 0.316
```

```

## siteUKB          675.112    130.937    5.156 2.54e-07 ***
## siteUmU         -1443.701    167.147   -8.637 < 2e-16 ***
## icv              1564.859     12.847  121.803 < 2e-16 ***
## bmi              -17.987      2.449   -7.345 2.10e-13 ***
## bmi:sleep_z      1.965        2.322    0.846    0.397
## ---
## Signif. codes:  0 '***' 0.001 '**' 0.01 '*' 0.05 '.' 0.1 ' ' 1
##
## Approximate significance of smooth terms:
##           edf Ref.df      F p-value
## s(age_z)   6.277  6.277 70.050 <2e-16 ***
## s(sleep_z) 2.565  2.565  3.789  0.0273 *
## ---
## Signif. codes:  0 '***' 0.001 '**' 0.01 '*' 0.05 '.' 0.1 ' ' 1
##
## R-sq.(adj) =  0.496
## lmer.REML = 5.8737e+05  Scale est. = 99312      n = 33424

```

We did the same controlling for depression. Below is the model with no covariates but only keeping data with depression.

```

##
## Family: gaussian
## Link function: identity
##
## Formula:
## value ~ sex + site + s(age_z, k = 10, bs = "cr") + s(sleep_z,
##           k = 5, bs = "cr") + icv
## <environment: 0x558ad8b83828>
##
## Parametric coefficients:
##           Estimate Std. Error t value Pr(>|t|)
## (Intercept) 23164.51    120.83 191.705 < 2e-16 ***
## sexmale      737.13      25.17  29.281 < 2e-16 ***
## siteousAvanto -2311.23    214.51 -10.774 < 2e-16 ***
## siteousPrisma -1768.20    218.91  -8.077 6.85e-16 ***
## siteousSkyra  -1338.79    176.52  -7.584 3.43e-14 ***
## siteUCAM      -2487.83    164.86 -15.091 < 2e-16 ***
## siteUKB       -1538.00    119.52 -12.868 < 2e-16 ***
## siteUmU       -3663.47    162.37 -22.562 < 2e-16 ***
## icv           1552.52     12.90 120.390 < 2e-16 ***
## ---
## Signif. codes:  0 '***' 0.001 '**' 0.01 '*' 0.05 '.' 0.1 ' ' 1
##
## Approximate significance of smooth terms:
##           edf Ref.df      F p-value
## s(age_z)   6.483  6.483 71.750 < 2e-16 ***
## s(sleep_z) 2.708  2.708  8.008 6.92e-05 ***
## ---
## Signif. codes:  0 '***' 0.001 '**' 0.01 '*' 0.05 '.' 0.1 ' ' 1
##
## R-sq.(adj) =  0.491
## lmer.REML = 5.8558e+05  Scale est. = 98487      n = 33336

```

Below is the model output with main effect.

```

##
## Family: gaussian
## Link function: identity
##
## Formula:
## value ~ sex + site + s(age_z, k = 10, bs = "cr") + s(sleep_z,
##     k = 5, bs = "cr") + icv + depression
## <environment: 0x558ad8b83828>
##
## Parametric coefficients:
##           Estimate Std. Error t value Pr(>|t|)
## (Intercept) 23211.94    121.31 191.346 < 2e-16 ***
## sexmale      732.13     25.19  29.059 < 2e-16 ***
## siteousAvanto -2286.15    214.50 -10.658 < 2e-16 ***
## siteousPrisma -1744.78    218.89  -7.971 1.63e-15 ***
## siteousSkyra -1310.90    176.56  -7.425 1.16e-13 ***
## siteUCAM     -2476.21    164.83 -15.023 < 2e-16 ***
## siteUKB      -1557.36    119.58 -13.024 < 2e-16 ***
## siteUmU      -3518.91    165.75 -21.230 < 2e-16 ***
## icv          1553.23     12.89 120.472 < 2e-16 ***
## depression   -389.37     90.16  -4.319 1.57e-05 ***
## ---
## Signif. codes:  0 '***' 0.001 '**' 0.01 '*' 0.05 '.' 0.1 ' ' 1
##
## Approximate significance of smooth terms:
##           edf Ref.df    F p-value
## s(age_z)   6.459  6.459 74.26 < 2e-16 ***
## s(sleep_z) 2.546  2.546  8.15 7.71e-05 ***
## ---
## Signif. codes:  0 '***' 0.001 '**' 0.01 '*' 0.05 '.' 0.1 ' ' 1
##
## R-sq.(adj) = 0.491
## lmer.REML = 5.8556e+05  Scale est. = 98413    n = 33336

```

Next is the model with depression-sleep interaction.

```

##
## Family: gaussian
## Link function: identity
##
## Formula:
## value ~ sex + site + s(age_z, k = 10, bs = "cr") + s(sleep_z,
##     k = 5, bs = "cr") + icv + depression + depression:sleep_z
## <environment: 0x558ad8b83828>
##
## Parametric coefficients:
##           Estimate Std. Error t value Pr(>|t|)
## (Intercept) 23211.92    121.31 191.343 < 2e-16 ***
## sexmale      732.27     25.20  29.060 < 2e-16 ***
## siteousAvanto -2285.17    214.52 -10.652 < 2e-16 ***
## siteousPrisma -1743.77    218.92  -7.965 1.70e-15 ***
## siteousSkyra -1309.94    176.59  -7.418 1.22e-13 ***
## siteUCAM     -2475.15    164.87 -15.013 < 2e-16 ***
## siteUKB      -1557.38    119.58 -13.024 < 2e-16 ***
## siteUmU      -3526.03    167.18 -21.091 < 2e-16 ***

```



```

## icv                1553.23      12.89 120.470 < 2e-16 ***
## depression         -387.68      90.32  -4.292 1.78e-05 ***
## depression:sleep_z  21.77      66.45   0.328  0.743
## ---
## Signif. codes:  0 '***' 0.001 '**' 0.01 '*' 0.05 '.' 0.1 ' ' 1
##
## Approximate significance of smooth terms:
##          edf Ref.df    F  p-value
## s(age_z)  6.461  6.461 74.252 < 2e-16 ***
## s(sleep_z) 2.509  2.509  8.024 0.000369 ***
## ---
## Signif. codes:  0 '***' 0.001 '**' 0.01 '*' 0.05 '.' 0.1 ' ' 1
##
## R-sq.(adj) =  0.491
## lmer.REML = 5.8555e+05  Scale est. = 98414    n = 33336

```

The plot below shows the sleep-volume curve for the original model and for the model with main effects of SES.

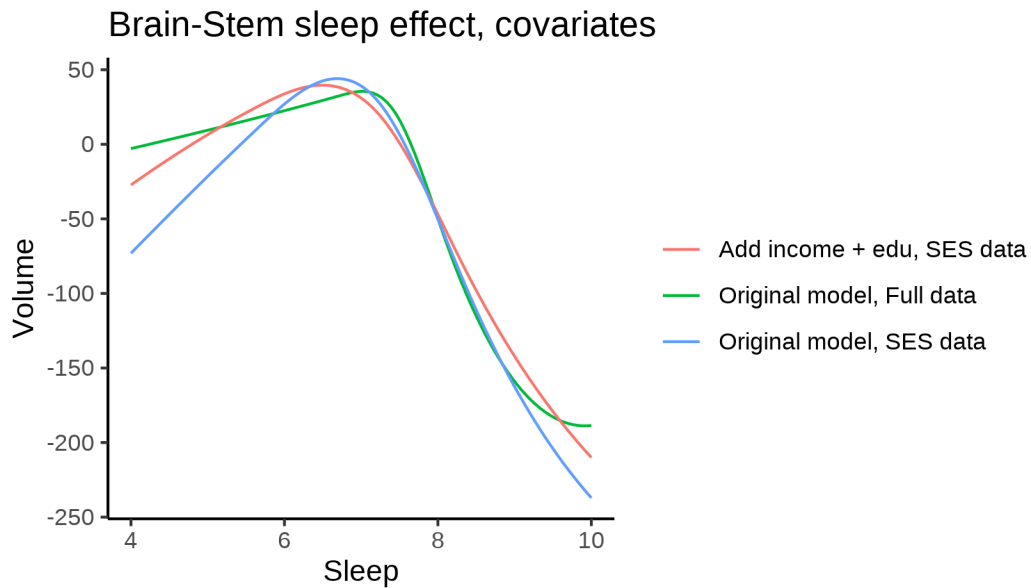

The plot below shows the sleep-volume curve for the original model and for the model with main effects of BMI.

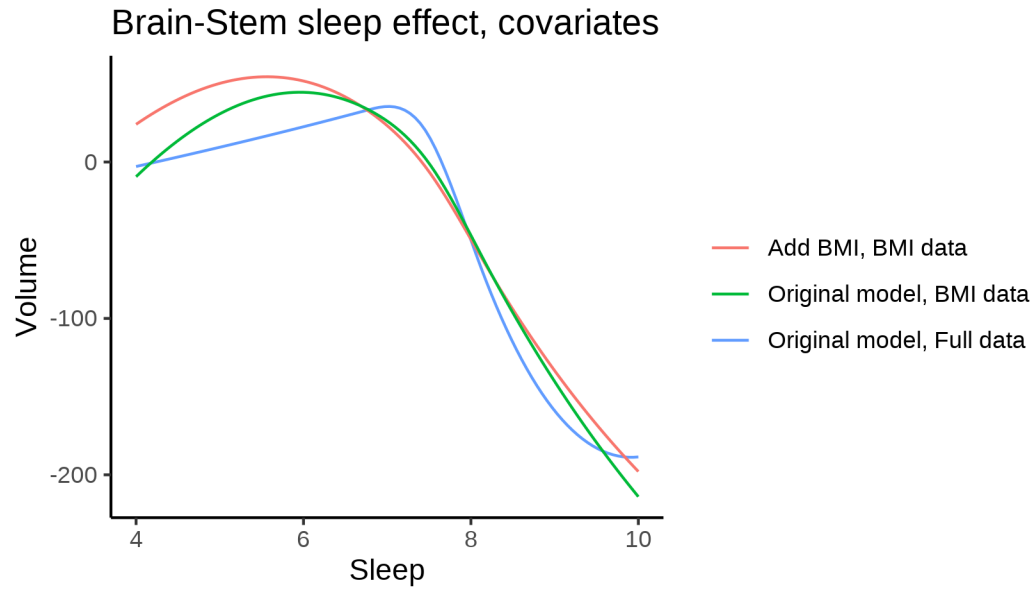

The plot below shows the sleep-volume curve for the original model and for the model with main effects of depression.

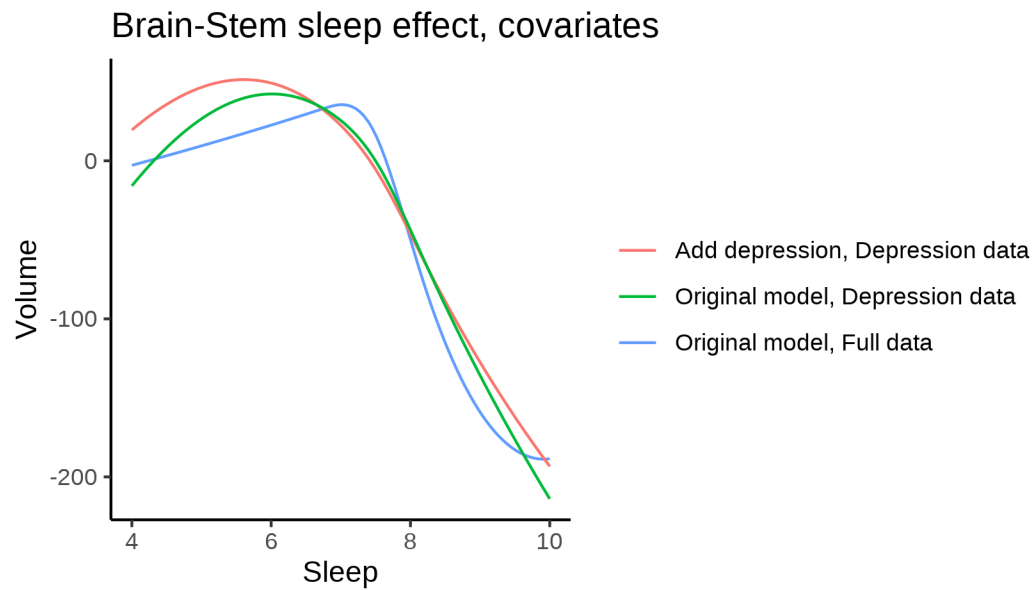

## Models Not controlling for ICV

### Model outputs

Model without sleep term

```
##
## Family: gaussian
## Link function: identity
##
## Formula:
```

```

## value ~ sex + site + s(age_z, k = 10, bs = "cr")
## <environment: 0x558961d9b4f8>
##
## Parametric coefficients:
##           Estimate Std. Error t value Pr(>|t|)
## (Intercept) 19947.34    107.26 185.972 < 2e-16 ***
## sexmale     2479.60     20.07 123.552 < 2e-16 ***
## siteMPIB    174.49     146.05   1.195  0.2322
## siteousAvanto 643.83    113.28   5.683 1.33e-08 ***
## siteousPrisma 789.30    182.41   4.327 1.51e-05 ***
## siteousSkyra 796.62    111.94   7.117 1.12e-12 ***
## siteUB      -634.70    359.94  -1.763  0.0778 .
## siteUCAM     34.99    126.40   0.277  0.7819
## siteUKB      888.61    109.83   8.091 6.05e-16 ***
## siteUmU     -2072.41    164.75 -12.579 < 2e-16 ***
## siteUOXF     70.38    134.77   0.522  0.6015
## ---
## Signif. codes:  0 '***' 0.001 '**' 0.01 '*' 0.05 '.' 0.1 ' ' 1
##
## Approximate significance of smooth terms:
##           edf Ref.df      F p-value
## s(age_z) 5.918  5.918 211.5 <2e-16 ***
## ---
## Signif. codes:  0 '***' 0.001 '**' 0.01 '*' 0.05 '.' 0.1 ' ' 1
##
## R-sq.(adj) =  0.258
## lmer.REML = 9.1936e+05  Scale est. = 1.0895e+05  n = 51266

```

Model with only main effects of age and sleep

```

##
## Family: gaussian
## Link function: identity
##
## Formula:
## value ~ sex + site + s(age_z, k = 10, bs = "cr") + s(sleep_z,
##           k = 5, bs = "cr")
## <environment: 0x558961d9b4f8>
##
## Parametric coefficients:
##           Estimate Std. Error t value Pr(>|t|)
## (Intercept) 19970.23    107.30 186.121 < 2e-16 ***
## sexmale     2475.01     20.07 123.342 < 2e-16 ***
## siteMPIB    178.11     145.99   1.220  0.2225
## siteousAvanto 627.20    113.25   5.538 3.07e-08 ***
## siteousPrisma 774.82    182.34   4.249 2.15e-05 ***
## siteousSkyra 778.21    111.90   6.955 3.58e-12 ***
## siteUB      -616.25    359.65  -1.713  0.0866 .
## siteUCAM     36.77    126.31   0.291  0.7710
## siteUKB      866.56    109.86   7.888 3.14e-15 ***
## siteUmU     -2068.68    164.98 -12.539 < 2e-16 ***
## siteUOXF     61.42    134.67   0.456  0.6483
## ---
## Signif. codes:  0 '***' 0.001 '**' 0.01 '*' 0.05 '.' 0.1 ' ' 1
##

```

```

## Approximate significance of smooth terms:
##           edf Ref.df      F p-value
## s(age_z)  5.896  5.896 204.97 <2e-16 ***
## s(sleep_z) 3.793  3.793  17.59 <2e-16 ***
## ---
## Signif. codes:  0 '***' 0.001 '**' 0.01 '*' 0.05 '.' 0.1 ' ' 1
##
## R-sq.(adj) =  0.259
## lmer.REML = 9.193e+05  Scale est. = 1.0903e+05  n = 51266

Model with full interaction between age and sleep

##
## Family: gaussian
## Link function: identity
##
## Formula:
## value ~ sex + site + t2(age_z, sleep_z, k = c(10, 4), bs = "cr")
## <environment: 0x558961d9b4f8>
##
## Parametric coefficients:
##           Estimate Std. Error t value Pr(>|t|)
## (Intercept) 19968.49    107.08 186.488 < 2e-16 ***
## sexmale      2480.29     20.10 123.368 < 2e-16 ***
## siteMPIB     156.64     146.28  1.071  0.2843
## siteousAvanto 636.75     113.67  5.602 2.14e-08 ***
## siteousPrisma 783.46     182.78  4.286 1.82e-05 ***
## siteousSkyra  788.70     112.35  7.020 2.24e-12 ***
## siteUB       -657.57    359.81 -1.828  0.0676 .
## siteUCAM      21.84     126.57  0.173  0.8630
## siteUKB       866.17     109.59  7.904 2.75e-15 ***
## siteUmU      -2086.19    165.02 -12.642 < 2e-16 ***
## siteUOXF      46.68     134.67  0.347  0.7289
## ---
## Signif. codes:  0 '***' 0.001 '**' 0.01 '*' 0.05 '.' 0.1 ' ' 1
##
## Approximate significance of smooth terms:
##           edf Ref.df      F p-value
## t2(age_z,sleep_z) 9.64  9.64 18.51 <2e-16 ***
## ---
## Signif. codes:  0 '***' 0.001 '**' 0.01 '*' 0.05 '.' 0.1 ' ' 1
##
## R-sq.(adj) =  0.258
## lmer.REML = 9.1934e+05  Scale est. = 1.0906e+05  n = 51266

```

## Model comparison

`mod_no_sleep` refers to model without sleep term, `mod_no_interaction` refers to model with only main effect of sleep, and `mod_full` refers to model with a full interaction between age and sleep. This is a nested model comparison, and the p-value at a given line refers to comparing the model at the line to the model on the line above. Hence, significance implies that the more complicated model is supported on statistical grounds.

To be even more specific, the p-value on the second row tests whether there is an association between sleep and volume. The p-value on the third row tests whether this association depends on age.

```

## Data: NULL
## Models:
## ml$mod_no_sleep$mer: NULL
## ml$mod_no_interaction$mer: NULL
## ml$mod_full$mer: NULL
##
##          npar    AIC    BIC logLik deviance Chisq Df Pr(>Chisq)
## ml$mod_no_sleep$mer      15 919389 919521 -459679    919359
## ml$mod_no_interaction$mer 17 919333 919483 -459649    919299 59.565  2 1.163e-13 ***
## ml$mod_full$mer          19 919377 919545 -459669    919339  0.000  2      1
## ---
## Signif. codes:  0 '***' 0.001 '**' 0.01 '*' 0.05 '.' 0.1 ' ' 1

```

We chose the model based on the likelihood ratio test with 5 % significance level, which was `mod_no_interaction`.

### Lifespan brain trajectory

The trajectory shown is from the chosen model `mod_no_interaction_no_icv`.

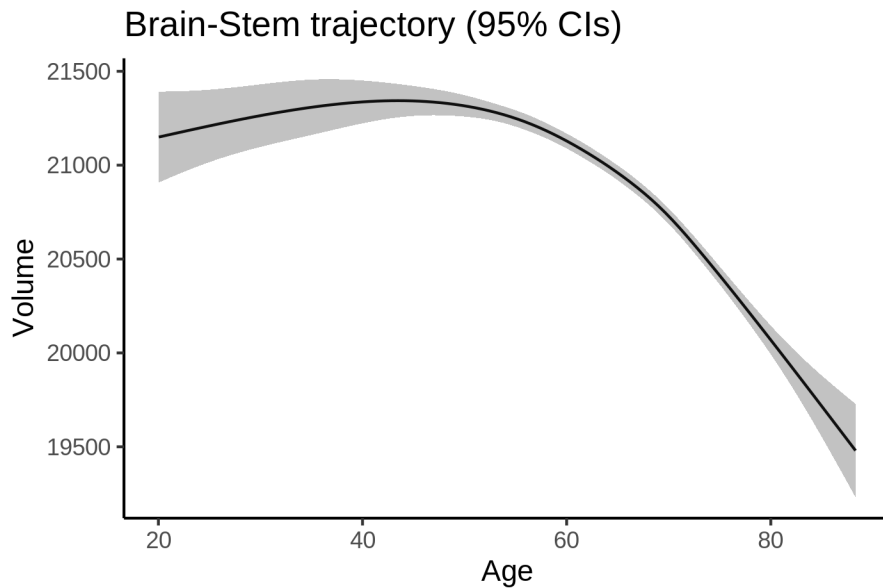

### Effect of sleep

The chosen model only included the main effect of sleep, and hence the effect does not vary with age. The black dot shows the average sleep duration across all ages in the sample.

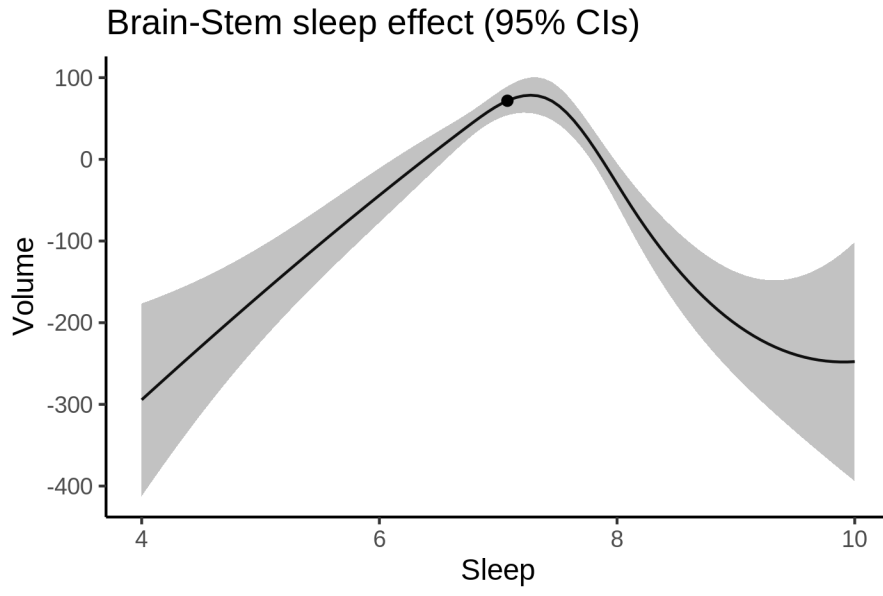

We also show the full interaction model for completeness, although it was not selected.

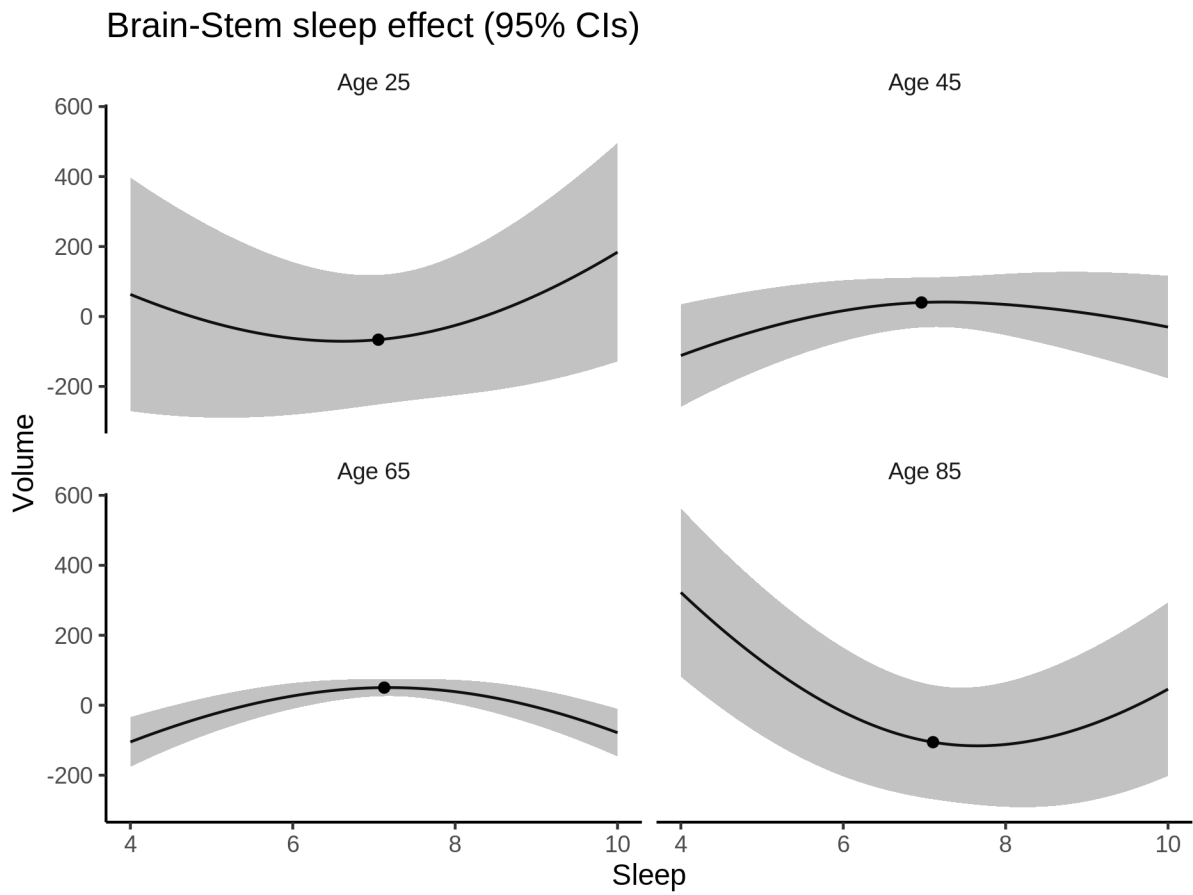

### Deviation from sleep associated with maximal volume

Model with only main effect of sleep was chosen, so we show it for all ages at once. Maximum volume is attained at 7.3 hours of sleep. The percentage values in the plot are calculated as follows: The maximum at 100 % refers to a person at an arbitrary age with a sleep duration associated with maximum volume. For a female, this volume is 20872 and for a male it is 23347. The other percentage values show how large the expected volume is for someone with other sleep durations. For example, 99 % implies a 1 % reduction.

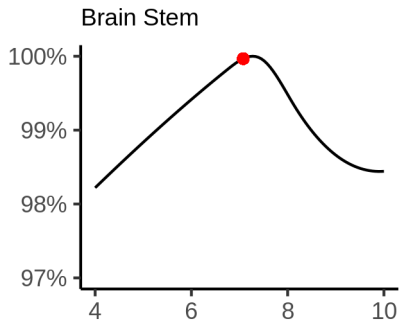

### Comparison of mean sleep and sleep associated with maximum volume

A 95 % confidence interval for the sleep associated with maximum volume is [7.15, 7.33].

The plot below compares average sleep to the sleep associated with maximum volume.

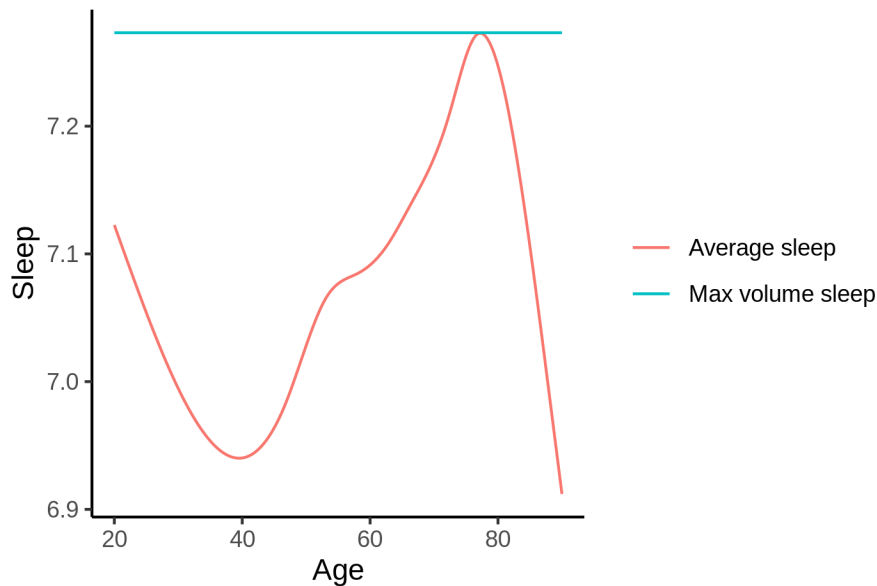

The next plot shows the difference between average sleep and sleep associated with maximum volume. The shaded region is a 95 % confidence interval.

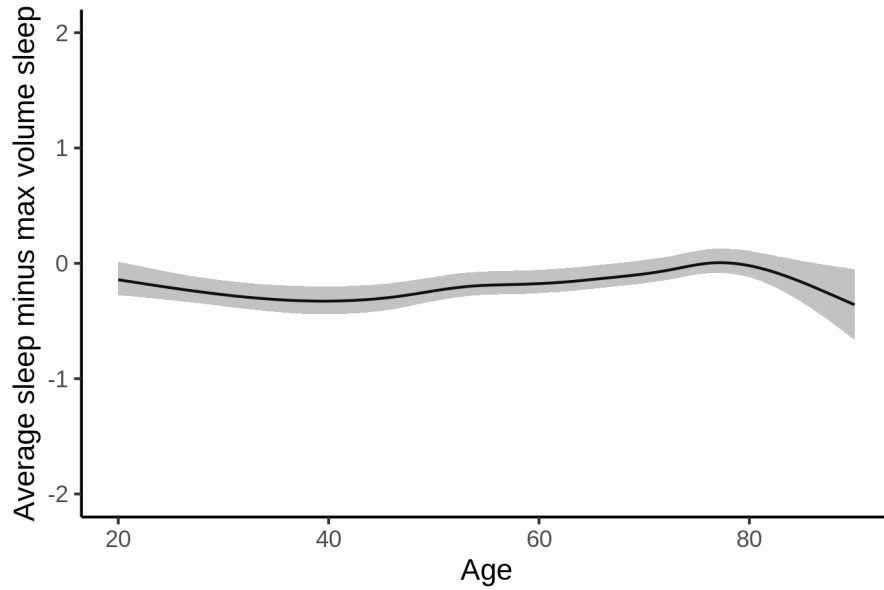

The next plot shows the probability that the sleep duration associated with maximum volume is longer than the average sleep duration, as a function of age. Probability below .05 can be interpreted as evidence that the sleep associated with maximum volume is shorter than the mean sleep, and probability above .95 can be interpreted the opposite way.

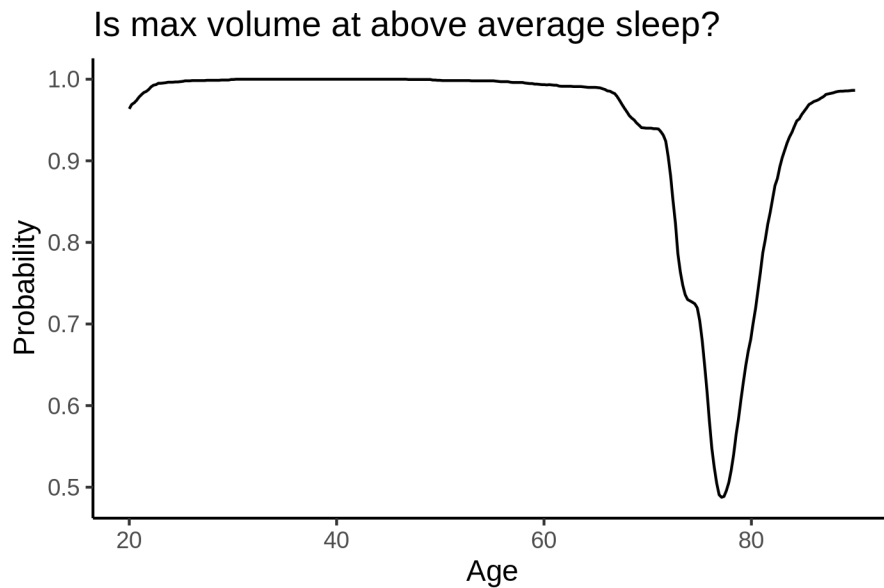

## Caudate

### Descriptive statistics

| Study | Observations | Unique IDs | Mean age | Age range |
|-------|--------------|------------|----------|-----------|
| HCP   | 974          | 974        | 28.8     | 22 - 37   |
| MPIB  | 675          | 390        | 63.2     | 24 - 83   |



| Study | Observations | Unique IDs | Mean age | Age range |
|-------|--------------|------------|----------|-----------|
| UB    | 113          | 39         | 70.9     | 64 - 81   |
| UCAM  | 884          | 632        | 55.1     | 20 - 88   |
| UiO   | 1473         | 803        | 49.3     | 20 - 88   |
| UKB   | 45976        | 43134      | 64.5     | 45 - 83   |
| UmU   | 412          | 279        | 62.2     | 25 - 85   |
| UOXF  | 769          | 769        | 69.8     | 60 - 85   |

## Spaghetti plot

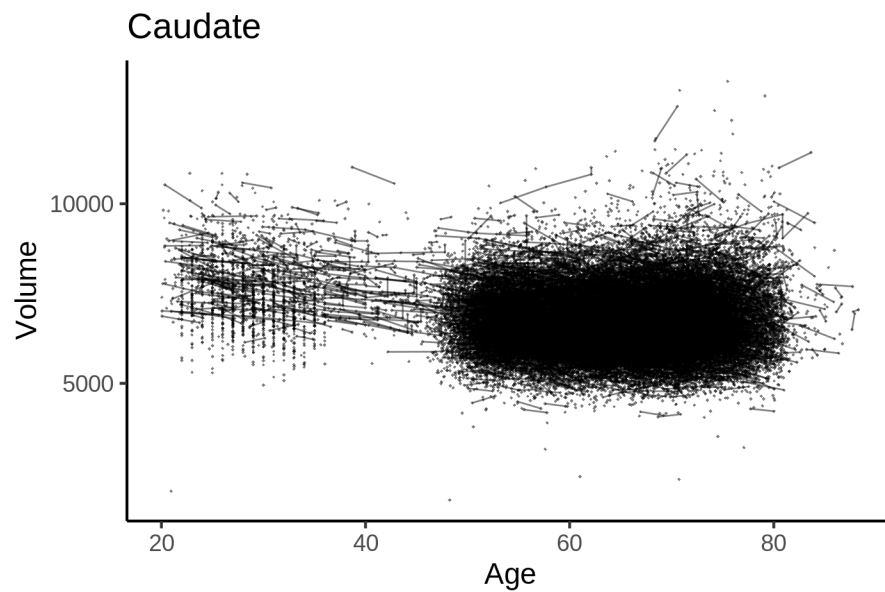

## Models Controlling for ICV

### Model outputs

Model without sleep term

```
##
## Family: gaussian
## Link function: identity
##
## Formula:
## value ~ sex + site + icv + s(age_z, k = 10, bs = "cr")
## <environment: 0x558adafc2c50>
##
## Parametric coefficients:
##              Estimate Std. Error t value Pr(>|t|)
## (Intercept)  6550.991   39.662 165.169 < 2e-16 ***
## sexmale      18.827     8.357   2.253 0.024273 *
## siteMPIB     1253.514   51.829  24.185 < 2e-16 ***
## siteousAvanto 497.301   40.406  12.308 < 2e-16 ***
## siteousPrisma 830.539   67.549  12.295 < 2e-16 ***
## siteousSkyra 836.760   39.297  21.293 < 2e-16 ***
```

```

## siteUB          554.409    123.512    4.489 7.18e-06 ***
## siteUCAM        618.009     44.688   13.829 < 2e-16 ***
## siteUKB         149.850     40.630    3.688 0.000226 ***
## siteUmU         795.984     57.972   13.731 < 2e-16 ***
## siteUOXF        631.897     48.600   13.002 < 2e-16 ***
## icv             462.192      4.190 110.312 < 2e-16 ***
## ---
## Signif. codes:  0 '***' 0.001 '**' 0.01 '*' 0.05 '.' 0.1 ' ' 1
##
## Approximate significance of smooth terms:
##           edf Ref.df      F p-value
## s(age_z)  7.779  7.779 77.05 <2e-16 ***
## ---
## Signif. codes:  0 '***' 0.001 '**' 0.01 '*' 0.05 '.' 0.1 ' ' 1
##
## R-sq.(adj) =  0.33
## lmer.REML = 8.1219e+05  Scale est. = 23405      n = 51276

Model with only main effects of age and sleep

##
## Family: gaussian
## Link function: identity
##
## Formula:
## value ~ sex + site + icv + s(age_z, k = 10, bs = "cr") + s(sleep_z,
## k = 5, bs = "cr")
## <environment: 0x558adafc2c50>
##
## Parametric coefficients:
##           Estimate Std. Error t value Pr(>|t|)
## (Intercept) 6554.418    39.694 165.125 < 2e-16 ***
## sexmale      18.950     8.357   2.268 0.023358 *
## siteMPIB     1249.743    51.859  24.099 < 2e-16 ***
## siteousAvanto 495.434    40.414  12.259 < 2e-16 ***
## siteousPrisma 829.229    67.548  12.276 < 2e-16 ***
## siteousSkyra  834.859    39.306  21.240 < 2e-16 ***
## siteUB       553.494   123.508   4.481 7.43e-06 ***
## siteUCAM     616.315    44.693  13.790 < 2e-16 ***
## siteUKB      146.206    40.665   3.595 0.000324 ***
## siteUmU      788.079    58.100  13.564 < 2e-16 ***
## siteUOXF     630.235    48.603  12.967 < 2e-16 ***
## icv          461.937     4.192 110.205 < 2e-16 ***
## ---
## Signif. codes:  0 '***' 0.001 '**' 0.01 '*' 0.05 '.' 0.1 ' ' 1
##
## Approximate significance of smooth terms:
##           edf Ref.df      F p-value
## s(age_z)   7.772  7.772 76.587 <2e-16 ***
## s(sleep_z) 1.000  1.000  4.033  0.0446 *
## ---
## Signif. codes:  0 '***' 0.001 '**' 0.01 '*' 0.05 '.' 0.1 ' ' 1
##
## R-sq.(adj) =  0.33
## lmer.REML = 8.1219e+05  Scale est. = 23399      n = 51276

```

Model with full interaction between age and sleep

```
##
## Family: gaussian
## Link function: identity
##
## Formula:
## value ~ sex + site + icv + t2(age_z, sleep_z, k = c(10, 4), bs = "cr")
## <environment: 0x558adafc2c50>
##
## Parametric coefficients:
##           Estimate Std. Error t value Pr(>|t|)
## (Intercept) 6557.739   39.932 164.223 < 2e-16 ***
## sexmale      19.843     8.374   2.370 0.017807 *
## siteMPIB     1246.007   52.154  23.891 < 2e-16 ***
## siteousAvanto 493.916   40.680  12.142 < 2e-16 ***
## siteousPrisma 827.163   67.709  12.216 < 2e-16 ***
## siteousSkyra 832.530   39.593  21.027 < 2e-16 ***
## siteUB       548.289  123.615   4.435 9.21e-06 ***
## siteUCAM     610.422   44.978  13.572 < 2e-16 ***
## siteUKB      142.411   40.908   3.481 0.000499 ***
## siteUmU      787.049   58.325  13.494 < 2e-16 ***
## siteUOXF     624.092   48.851  12.775 < 2e-16 ***
## icv          461.792    4.192 110.152 < 2e-16 ***
## ---
## Signif. codes:  0 '***' 0.001 '**' 0.01 '*' 0.05 '.' 0.1 ' ' 1
##
## Approximate significance of smooth terms:
##           edf Ref.df    F p-value
## t2(age_z,sleep_z) 12.28  12.28 10.52 <2e-16 ***
## ---
## Signif. codes:  0 '***' 0.001 '**' 0.01 '*' 0.05 '.' 0.1 ' ' 1
##
## R-sq.(adj) =  0.33
## lmer.REML = 8.1219e+05  Scale est. = 23381    n = 51276
```

## Model comparison

`mod_no_sleep` refers to model without sleep term, `mod_no_interaction` refers to model with only main effect of sleep, and `mod_full` refers to model with a full interaction between age and sleep. This is a nested model comparison, and the p-value at a given line refers to comparing the model at the line to the model on the line above. Hence, significance implies that the more complicated model is supported on statistical grounds.

To be even more specific, the p-value on the second row tests whether there is an association between sleep and volume. The p-value on the third row tests whether this association depends on age.

```
## Data: NULL
## Models:
## ml$mod_no_sleep$mer: NULL
## ml$mod_no_interaction$mer: NULL
## ml$mod_full$mer: NULL
##           npar    AIC    BIC logLik deviance Chisq Df Pr(>Chisq)
## ml$mod_no_sleep$mer      16 812224 812365 -406096    812192
## ml$mod_no_interaction$mer  18 812224 812383 -406094    812188 4.0326 2    0.1331
```

```
## ml$mod_full$mer          20 812233 812410 -406096 812193 0.0000 2 1.0000
```

We chose the model based on the likelihood ratio test with 5 % significance level, which was `mod_no_sleep`.

### Lifespan brain trajectory

The trajectory shown is from the chosen model `mod_no_sleep`.

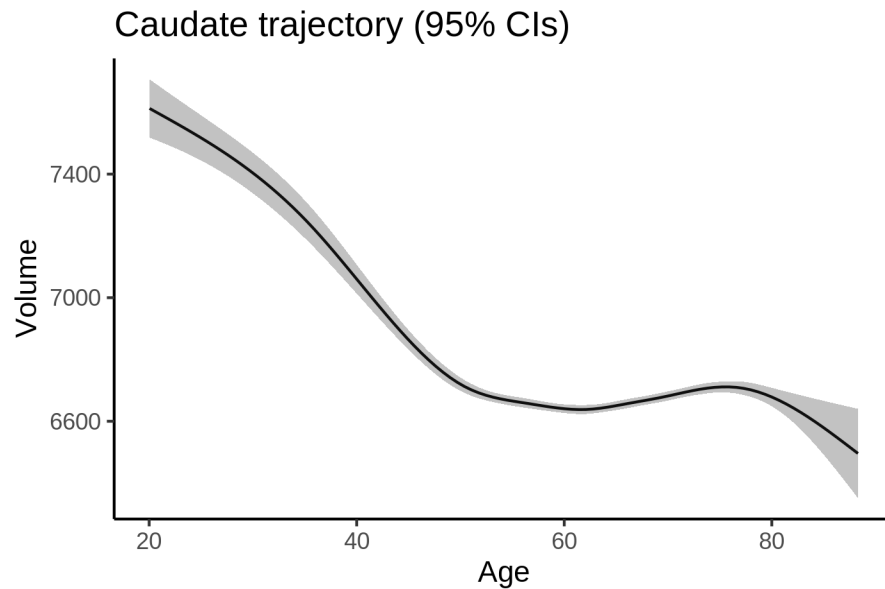

### Effect of sleep

The chosen model did not include a sleep term, and hence we don't have any estimated effect of sleep.

We show the full interaction model for completeness, although it was not selected.

## Caudate sleep effect (95% CIs)

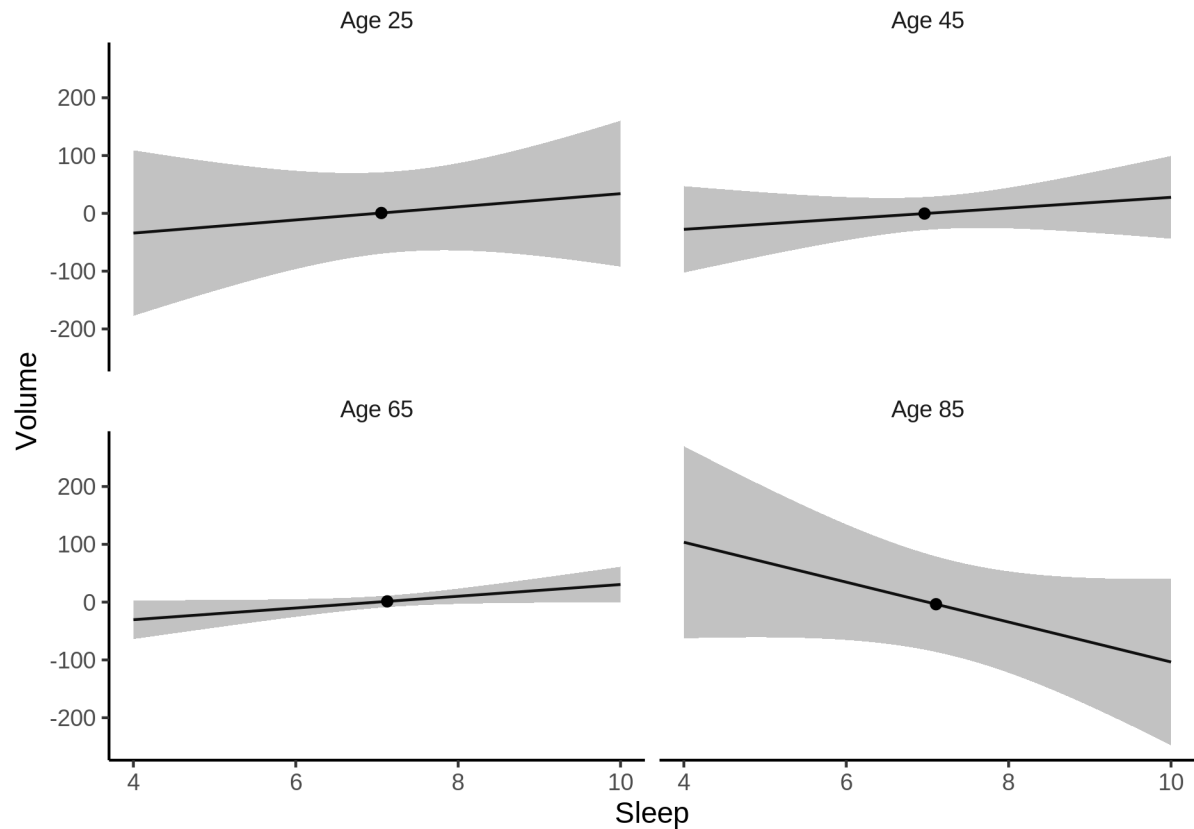

### Deviation from sleep associated with maximal volume

Model with no sleep term was selected. No plots to show. (Although we can of course dig up the plots, which will be pretty flat).

### Comparison of mean sleep and sleep associated with maximum volume

Nothing to show, as we did not find an association between sleep and volume.

### Controlling for covariates

Below is the output for a model in which we only include data with income and education.

```
##  
## Family: gaussian  
## Link function: identity  
##  
## Formula:  
## value ~ sex + site + s(age_z, k = 10, bs = "cr") + s(sleep_z,  
##     k = 5, bs = "cr") + icv  
## <environment: 0x558ada722128>  
##  
## Parametric coefficients:
```

```

##           Estimate Std. Error t value Pr(>|t|)
## (Intercept)  8195.179    96.415  84.999 < 2e-16 ***
## sexmale      3.556     10.583   0.336  0.737
## siteousAvanto -1132.854   111.188 -10.189 < 2e-16 ***
## siteousPrisma -657.472   117.070  -5.616 1.97e-08 ***
## siteousSkyra  -747.335   104.471  -7.154 8.64e-13 ***
## siteUKB      -1512.887    96.206 -15.725 < 2e-16 ***
## siteUOXF     -930.264   108.296  -8.590 < 2e-16 ***
## icv          468.475     5.414  86.526 < 2e-16 ***
## ---
## Signif. codes:  0 '***' 0.001 '**' 0.01 '*' 0.05 '.' 0.1 ' ' 1
##
## Approximate significance of smooth terms:
##           edf Ref.df      F p-value
## s(age_z)   5.543  5.543 35.010 <2e-16 ***
## s(sleep_z) 1.000  1.000  2.432  0.119
## ---
## Signif. codes:  0 '***' 0.001 '**' 0.01 '*' 0.05 '.' 0.1 ' ' 1
##
## R-sq.(adj) =  0.305
## lmer.REML = 4.9378e+05  Scale est. = 22017      n = 31194

```

Below is the output for a model in which we control for the main effects of income and education.

```

##
## Family: gaussian
## Link function: identity
##
## Formula:
## value ~ sex + site + s(age_z, k = 10, bs = "cr") + s(sleep_z,
##           k = 5, bs = "cr") + icv + income_scaled + education_scaled
## <environment: 0x558ada722128>
##
## Parametric coefficients:
##           Estimate Std. Error t value Pr(>|t|)
## (Intercept)  8163.561    96.992  84.167 < 2e-16 ***
## sexmale      4.769     10.612   0.449 0.65314
## siteousAvanto -1136.526   111.207 -10.220 < 2e-16 ***
## siteousPrisma -661.245   117.063  -5.649 1.63e-08 ***
## siteousSkyra  -751.455   104.486  -7.192 6.53e-13 ***
## siteUKB      -1518.066    96.250 -15.772 < 2e-16 ***
## siteUOXF     -922.490   108.337  -8.515 < 2e-16 ***
## icv          466.476     5.460  85.430 < 2e-16 ***
## income_scaled  5.535     12.579   0.440 0.65993
## education_scaled 43.054    14.919   2.886 0.00391 **
## ---
## Signif. codes:  0 '***' 0.001 '**' 0.01 '*' 0.05 '.' 0.1 ' ' 1
##
## Approximate significance of smooth terms:
##           edf Ref.df      F p-value
## s(age_z)   5.566  5.566 34.89 <2e-16 ***
## s(sleep_z) 1.000  1.000  2.23  0.135
## ---
## Signif. codes:  0 '***' 0.001 '**' 0.01 '*' 0.05 '.' 0.1 ' ' 1
##

```

```
## R-sq.(adj) = 0.305
## lmer.REML = 4.9375e+05 Scale est. = 22023 n = 31194
```

We also included interaction effects between sleep duration and education and income, in another model. The output is shown below, and the interaction terms are `income_scaled:sleep_z` and `education_scaled:sleep_z`.

```
##
## Family: gaussian
## Link function: identity
##
## Formula:
## value ~ sex + site + s(age_z, k = 10, bs = "cr") + s(sleep_z,
##   k = 5, bs = "cr") + icv + income_scaled + education_scaled +
##   income_scaled:sleep_z + education_scaled:sleep_z
## <environment: 0x558ada722128>
##
## Parametric coefficients:
##               Estimate Std. Error t value Pr(>|t|)
## (Intercept)    8160.728    96.983  84.146 < 2e-16 ***
## sexmale         4.147     10.618   0.391 0.69608
## siteousAvanto -1135.808    111.195 -10.215 < 2e-16 ***
## siteousPrisma -661.555    117.057  -5.652 1.60e-08 ***
## siteousSkyra  -750.758    104.473  -7.186 6.81e-13 ***
## siteUKB        -1514.383    96.244 -15.735 < 2e-16 ***
## siteUOXF       -914.964    108.350  -8.445 < 2e-16 ***
## icv            466.353     5.460  85.411 < 2e-16 ***
## income_scaled   6.161     12.584   0.490 0.62444
## education_scaled 42.857     14.919   2.873 0.00407 **
## income_scaled:sleep_z -30.836    12.490  -2.469 0.01356 *
## education_scaled:sleep_z -20.726    14.440  -1.435 0.15123
## ---
## Signif. codes:  0 '***' 0.001 '**' 0.01 '*' 0.05 '.' 0.1 ' ' 1
##
## Approximate significance of smooth terms:
##               edf Ref.df    F p-value
## s(age_z)      5.568  5.568 34.942 < 2e-16 ***
## s(sleep_z)    1.000  1.000  9.089 0.00257 **
## ---
## Signif. codes:  0 '***' 0.001 '**' 0.01 '*' 0.05 '.' 0.1 ' ' 1
##
## R-sq.(adj) = 0.305
## lmer.REML = 4.9373e+05 Scale est. = 22024 n = 31194
```

We did the same controlling for BMI. Below is the model with no covariates but only keeping data with BMI.

```
##
## Family: gaussian
## Link function: identity
##
## Formula:
## value ~ sex + site + s(age_z, k = 10, bs = "cr") + s(sleep_z,
##   k = 5, bs = "cr") + icv
## <environment: 0x558a4a136af8>
##
## Parametric coefficients:
```

```

##           Estimate Std. Error t value Pr(>|t|)
## (Intercept) 7032.760    57.252 122.838 < 2e-16 ***
## sexmale     -3.318     10.285  -0.323  0.747
## siteousPrisma 346.047    76.074   4.549 5.41e-06 ***
## siteousSkyra 345.832    38.865   8.898 < 2e-16 ***
## siteUCAM     115.784    61.317   1.888  0.059 .
## siteUKB     -337.430    57.876  -5.830 5.59e-09 ***
## siteUmU      303.460    71.683   4.233 2.31e-05 ***
## icv          476.551     5.281  90.238 < 2e-16 ***
## ---
## Signif. codes:  0 '***' 0.001 '**' 0.01 '*' 0.05 '.' 0.1 ' ' 1
##
## Approximate significance of smooth terms:
##           edf Ref.df      F p-value
## s(age_z)   7.633  7.633 51.37 <2e-16 ***
## s(sleep_z) 1.000  1.000  1.92  0.166
## ---
## Signif. codes:  0 '***' 0.001 '**' 0.01 '*' 0.05 '.' 0.1 ' ' 1
##
## R-sq.(adj) =  0.328
## lmer.REML = 5.2896e+05  Scale est. = 23120    n = 33438

```

Below is the model output with main effect.

```

##
## Family: gaussian
## Link function: identity
##
## Formula:
## value ~ sex + site + s(age_z, k = 10, bs = "cr") + s(sleep_z,
##           k = 5, bs = "cr") + icv + bmi
## <environment: 0x558a4a136af8>
##
## Parametric coefficients:
##           Estimate Std. Error t value Pr(>|t|)
## (Intercept) 6969.977    62.597 111.347 < 2e-16 ***
## sexmale     -5.312     10.316  -0.515  0.6066
## siteousPrisma 344.232    76.076   4.525 6.06e-06 ***
## siteousSkyra 345.758    38.867   8.896 < 2e-16 ***
## siteUCAM     114.409    61.318   1.866  0.0621 .
## siteUKB     -339.208    57.880  -5.861 4.66e-09 ***
## siteUmU      300.903    71.687   4.197 2.71e-05 ***
## icv          476.207     5.282  90.149 < 2e-16 ***
## bmi           2.484     1.002   2.478  0.0132 *
## ---
## Signif. codes:  0 '***' 0.001 '**' 0.01 '*' 0.05 '.' 0.1 ' ' 1
##
## Approximate significance of smooth terms:
##           edf Ref.df      F p-value
## s(age_z)   7.639  7.639 51.811 <2e-16 ***
## s(sleep_z) 1.000  1.000  2.238  0.135
## ---
## Signif. codes:  0 '***' 0.001 '**' 0.01 '*' 0.05 '.' 0.1 ' ' 1
##
## R-sq.(adj) =  0.328

```



```
## lmer.REML = 5.2895e+05 Scale est. = 23122 n = 33438
```

Next is the model with BMI-sleep interaction.

```
##
## Family: gaussian
## Link function: identity
##
## Formula:
## value ~ sex + site + s(age_z, k = 10, bs = "cr") + s(sleep_z,
##     k = 5, bs = "cr") + icv + bmi + bmi:sleep_z
## <environment: 0x558a4a136af8>
##
## Parametric coefficients:
##           Estimate Std. Error t value Pr(>|t|)
## (Intercept) 6966.212    62.629 111.229 < 2e-16 ***
## sexmale      -5.239     10.316  -0.508  0.6116
## siteousPrisma 344.195    76.074   4.524 6.08e-06 ***
## siteousSkyra 346.018    38.867   8.903 < 2e-16 ***
## siteUCAM     115.771    61.321   1.888  0.0590 .
## siteUKB     -337.909    57.883  -5.838 5.34e-09 ***
## siteUmU      302.102    71.688   4.214 2.51e-05 ***
## icv          476.272     5.282  90.163 < 2e-16 ***
## bmi           2.545     1.003   2.538  0.0112 *
## bmi:sleep_z   1.725     0.949   1.817  0.0692 .
## ---
## Signif. codes:  0 '***' 0.001 '**' 0.01 '*' 0.05 '.' 0.1 ' ' 1
##
## Approximate significance of smooth terms:
##           edf Ref.df      F p-value
## s(age_z)   7.639  7.639 51.935 <2e-16 ***
## s(sleep_z) 1.000  1.000  2.379  0.123
## ---
## Signif. codes:  0 '***' 0.001 '**' 0.01 '*' 0.05 '.' 0.1 ' ' 1
##
## R-sq.(adj) = 0.328
## lmer.REML = 5.2894e+05 Scale est. = 23122 n = 33438
```

We did the same controlling for depression. Below is the model with no covariates but only keeping data with depression.

```
##
## Family: gaussian
## Link function: identity
##
## Formula:
## value ~ sex + site + s(age_z, k = 10, bs = "cr") + s(sleep_z,
##     k = 5, bs = "cr") + icv
## <environment: 0x558ad9361bd0>
##
## Parametric coefficients:
##           Estimate Std. Error t value Pr(>|t|)
## (Intercept) 7701.734    49.303 156.213 < 2e-16 ***
## sexmale      -1.979     10.313  -0.192  0.84781
## siteousAvanto -630.865    93.833  -6.723 1.81e-11 ***
## siteousPrisma -288.132    92.159  -3.126  0.00177 **
```

```

## siteousSkyra   -187.936      73.512  -2.557  0.01058 *
## siteUCAM      -525.589      67.566  -7.779  7.53e-15 ***
## siteUKB       -1012.006     48.763 -20.753 < 2e-16 ***
## siteUmU       -359.475      66.335  -5.419  6.03e-08 ***
## icv           474.353       5.289  89.687 < 2e-16 ***
## ---
## Signif. codes:  0 '***' 0.001 '**' 0.01 '*' 0.05 '.' 0.1 ' ' 1
##
## Approximate significance of smooth terms:
##           edf Ref.df      F p-value
## s(age_z)  7.609  7.609 28.478 <2e-16 ***
## s(sleep_z) 1.000  1.000  1.959  0.162
## ---
## Signif. codes:  0 '***' 0.001 '**' 0.01 '*' 0.05 '.' 0.1 ' ' 1
##
## R-sq.(adj) =  0.32
## lmer.REML = 5.2725e+05  Scale est. = 23572      n = 33350

```

Below is the model output with main effect.

```

##
## Family: gaussian
## Link function: identity
##
## Formula:
## value ~ sex + site + s(age_z, k = 10, bs = "cr") + s(sleep_z,
##           k = 5, bs = "cr") + icv + depression
## <environment: 0x558ad9361bd0>
##
## Parametric coefficients:
##           Estimate Std. Error t value Pr(>|t|)
## (Intercept)  7695.519    49.517 155.412 < 2e-16 ***
## sexmale      -1.360     10.323  -0.132  0.89520
## siteousAvanto -633.999    93.865  -6.754  1.46e-11 ***
## siteousPrisma -290.976    92.183  -3.157  0.00160 **
## siteousSkyra  -191.419    73.556  -2.602  0.00926 **
## siteUCAM     -527.067    67.573  -7.800  6.37e-15 ***
## siteUKB     -1009.331    48.802 -20.682 < 2e-16 ***
## siteUmU     -377.754    67.708  -5.579  2.44e-08 ***
## icv          474.301     5.289  89.677 < 2e-16 ***
## depression    49.299    36.623   1.346  0.17827
## ---
## Signif. codes:  0 '***' 0.001 '**' 0.01 '*' 0.05 '.' 0.1 ' ' 1
##
## Approximate significance of smooth terms:
##           edf Ref.df      F p-value
## s(age_z)  7.611  7.611 28.602 <2e-16 ***
## s(sleep_z) 1.000  1.000  2.224  0.136
## ---
## Signif. codes:  0 '***' 0.001 '**' 0.01 '*' 0.05 '.' 0.1 ' ' 1
##
## R-sq.(adj) =  0.32
## lmer.REML = 5.2724e+05  Scale est. = 23579      n = 33350

```

Next is the model with depression-sleep interaction.

```

##
## Family: gaussian
## Link function: identity
##
## Formula:
## value ~ sex + site + s(age_z, k = 10, bs = "cr") + s(sleep_z,
##     k = 5, bs = "cr") + icv + depression + depression:sleep_z
## <environment: 0x558ad9361bd0>
##
## Parametric coefficients:
##           Estimate Std. Error t value Pr(>|t|)
## (Intercept)  7695.525    49.518 155.410 < 2e-16 ***
## sexmale      -1.310     10.325  -0.127  0.89903
## siteousAvanto -633.666    93.875  -6.750 1.50e-11 ***
## siteousPrisma -290.658    92.193  -3.153  0.00162 **
## siteousSkyra  -191.101    73.568  -2.598  0.00939 **
## siteUCAM     -526.703    67.588  -7.793 6.74e-15 ***
## siteUKB     -1009.353    48.803 -20.682 < 2e-16 ***
## siteUmU     -380.150    68.262  -5.569 2.58e-08 ***
## icv          474.296     5.289  89.674 < 2e-16 ***
## depression    49.862    36.680   1.359  0.17404
## depression:sleep_z  7.392    26.778   0.276  0.78250
## ---
## Signif. codes:  0 '***' 0.001 '**' 0.01 '*' 0.05 '.' 0.1 ' ' 1
##
## Approximate significance of smooth terms:
##           edf Ref.df      F p-value
## s(age_z)   7.613  7.613 28.579 <2e-16 ***
## s(sleep_z) 1.000  1.000  1.235  0.266
## ---
## Signif. codes:  0 '***' 0.001 '**' 0.01 '*' 0.05 '.' 0.1 ' ' 1
##
## R-sq.(adj) =  0.32
## lmer.REML = 5.2723e+05  Scale est. = 23579      n = 33350

```

The plot below shows the sleep-volume curve for the original model and for the model with main effects of SES.

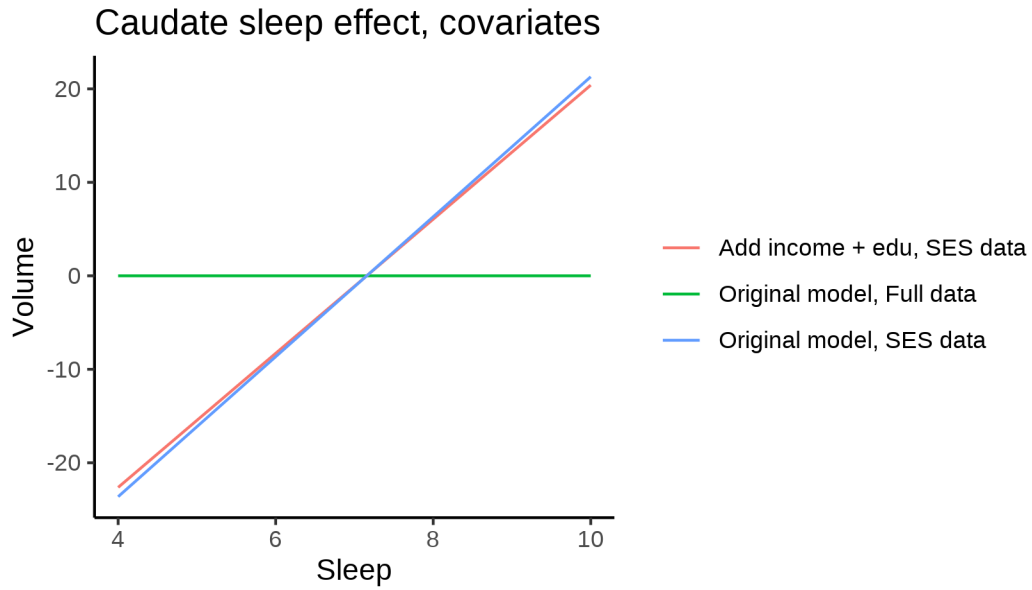

The plot below shows the sleep-volume curve for the original model and for the model with main effects of BMI.

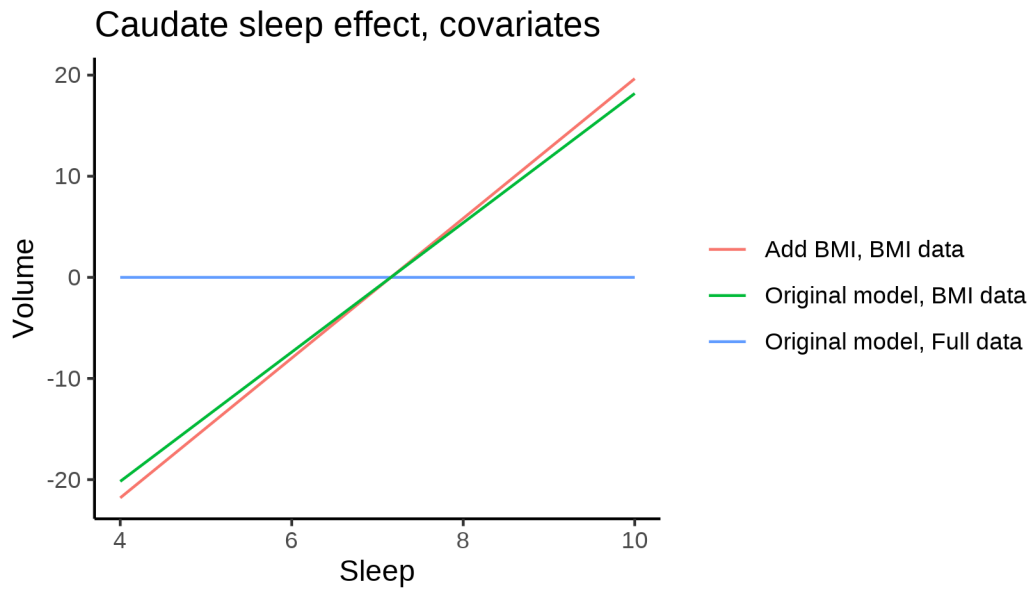

The plot below shows the sleep-volume curve for the original model and for the model with main effects of depression.

## Caudate sleep effect, covariates

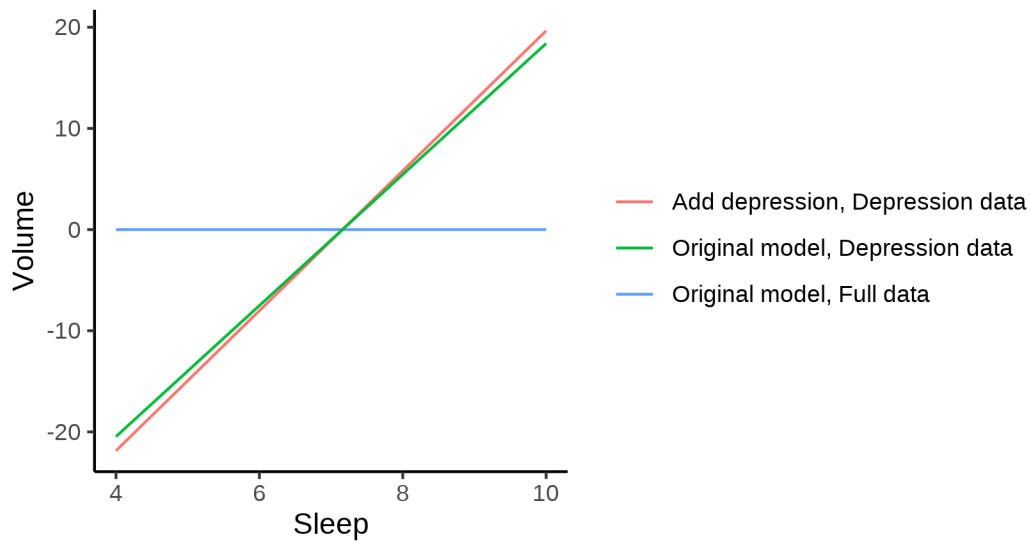

## Models Not controlling for ICV

### Model outputs

Model without sleep term

```
##
## Family: gaussian
## Link function: identity
##
## Formula:
## value ~ sex + site + s(age_z, k = 10, bs = "cr")
## <environment: 0x5589766c7e80>
##
## Parametric coefficients:
##              Estimate Std. Error t value Pr(>|t|)
## (Intercept)  6293.736    43.361  145.148 < 2e-16 ***
## sexmale      543.806     7.705   70.574 < 2e-16 ***
## siteMPIB     512.017    57.161   8.957 < 2e-16 ***
## siteousAvanto 687.685    44.604  15.418 < 2e-16 ***
## siteousPrisma 988.985    73.901  13.382 < 2e-16 ***
## siteousSkyra  862.553    43.694  19.741 < 2e-16 ***
## siteUB       422.673   138.445   3.053 0.002267 **
## siteUCAM     645.614    49.594  13.018 < 2e-16 ***
## siteUKB      166.870    44.471   3.752 0.000175 ***
## siteUmU      612.482    64.424   9.507 < 2e-16 ***
## siteUOXF     528.850    53.600   9.867 < 2e-16 ***
## ---
## Signif. codes:  0 '***' 0.001 '**' 0.01 '*' 0.05 '.' 0.1 ' ' 1
##
## Approximate significance of smooth terms:
##              edf Ref.df    F p-value
## s(age_z)    7.028  7.028 83.63 <2e-16 ***
```

```
## ---
## Signif. codes:  0 '***' 0.001 '**' 0.01 '*' 0.05 '.' 0.1 ' ' 1
##
## R-sq.(adj) =  0.156
## lmer.REML = 8.2303e+05  Scale est. = 23853      n = 51276
```

Model with only main effects of age and sleep

```
##
## Family: gaussian
## Link function: identity
##
## Formula:
## value ~ sex + site + s(age_z, k = 10, bs = "cr") + s(sleep_z,
##      k = 5, bs = "cr")
## <environment: 0x5589766c7e80>
##
## Parametric coefficients:
##              Estimate Std. Error t value Pr(>|t|)
## (Intercept)  6304.577    43.384 145.320 < 2e-16 ***
## sexmale      542.914     7.707  70.447 < 2e-16 ***
## siteMPIB     503.657    57.168   8.810 < 2e-16 ***
## siteousAvanto 681.187    44.605  15.272 < 2e-16 ***
## siteousPrisma 984.177    73.886  13.320 < 2e-16 ***
## siteousSkyra  856.110    43.695  19.593 < 2e-16 ***
## siteUB       421.902   138.404   3.048 0.002302 **
## siteUCAM     641.354    49.583  12.935 < 2e-16 ***
## siteUKB      155.948    44.493   3.505 0.000457 ***
## siteUmU      592.211    64.542   9.176 < 2e-16 ***
## siteUOXF     524.069    53.581   9.781 < 2e-16 ***
```

```
## ---
## Signif. codes:  0 '***' 0.001 '**' 0.01 '*' 0.05 '.' 0.1 ' ' 1
##
## Approximate significance of smooth terms:
##              edf Ref.df      F p-value
## s(age_z)     6.999  6.999 83.71 < 2e-16 ***
## s(sleep_z)   2.054  2.054 13.57 1.02e-06 ***
```

```
## ---
## Signif. codes:  0 '***' 0.001 '**' 0.01 '*' 0.05 '.' 0.1 ' ' 1
##
## R-sq.(adj) =  0.157
## lmer.REML = 8.23e+05  Scale est. = 23843      n = 51276
```

Model with full interaction between age and sleep

```
##
## Family: gaussian
## Link function: identity
##
## Formula:
## value ~ sex + site + t2(age_z, sleep_z, k = c(10, 4), bs = "cr")
## <environment: 0x5589766c7e80>
##
## Parametric coefficients:
##              Estimate Std. Error t value Pr(>|t|)
## (Intercept)  6312.93     43.56 144.908 < 2e-16 ***
```

```

## sexmale          544.92      7.72  70.588 < 2e-16 ***
## siteMPIB         491.50     57.44   8.556 < 2e-16 ***
## siteousAvanto    676.10     44.87  15.069 < 2e-16 ***
## siteousPrisma    977.64     74.05  13.203 < 2e-16 ***
## siteousSkyra     849.50     43.98  19.317 < 2e-16 ***
## siteUB           406.48    138.49   2.935 0.00334 **
## siteUCAM         627.46     49.85  12.586 < 2e-16 ***
## siteUKB          146.56     44.67   3.281 0.00104 **
## siteUmU          585.09     64.74   9.038 < 2e-16 ***
## siteUOXF         509.67     53.78   9.476 < 2e-16 ***
## ---
## Signif. codes:  0 '***' 0.001 '**' 0.01 '*' 0.05 '.' 0.1 ' ' 1
##
## Approximate significance of smooth terms:
##                edf Ref.df    F p-value
## t2(age_z,sleep_z) 10.66  10.66 9.943 <2e-16 ***
## ---
## Signif. codes:  0 '***' 0.001 '**' 0.01 '*' 0.05 '.' 0.1 ' ' 1
##
## R-sq.(adj) =  0.157
## lmer.REML = 8.23e+05  Scale est. = 23811    n = 51276

```

## Model comparison

`mod_no_sleep` refers to model without sleep term, `mod_no_interaction` refers to model with only main effect of sleep, and `mod_full` refers to model with a full interaction between age and sleep. This is a nested model comparison, and the p-value at a given line refers to comparing the model at the line to the model on the line above. Hence, significance implies that the more complicated model is supported on statistical grounds.

To be even more specific, the p-value on the second row tests whether there is an association between sleep and volume. The p-value on the third row tests whether this association depends on age.

```

## Data: NULL
## Models:
## ml$mod_no_sleep$mer: NULL
## ml$mod_no_interaction$mer: NULL
## ml$mod_full$mer: NULL
##
##                npar    AIC    BIC logLik deviance  Chisq Df Pr(>Chisq)
## ml$mod_no_sleep$mer      15 823059 823191 -411514   823029
## ml$mod_no_interaction$mer 17 823038 823188 -411502   823004 24.7369  2 4.251e-06 ***
## ml$mod_full$mer          19 823039 823207 -411500   823001  3.2705  2  0.1949
## ---
## Signif. codes:  0 '***' 0.001 '**' 0.01 '*' 0.05 '.' 0.1 ' ' 1

```

We chose the model based on the likelihood ratio test with 5 % significance level, which was `mod_no_interaction`.

## Lifespan brain trajectory

The trajectory shown is from the chosen model `mod_no_interaction_no_icv`.

Caudate trajectory (95% CIs)

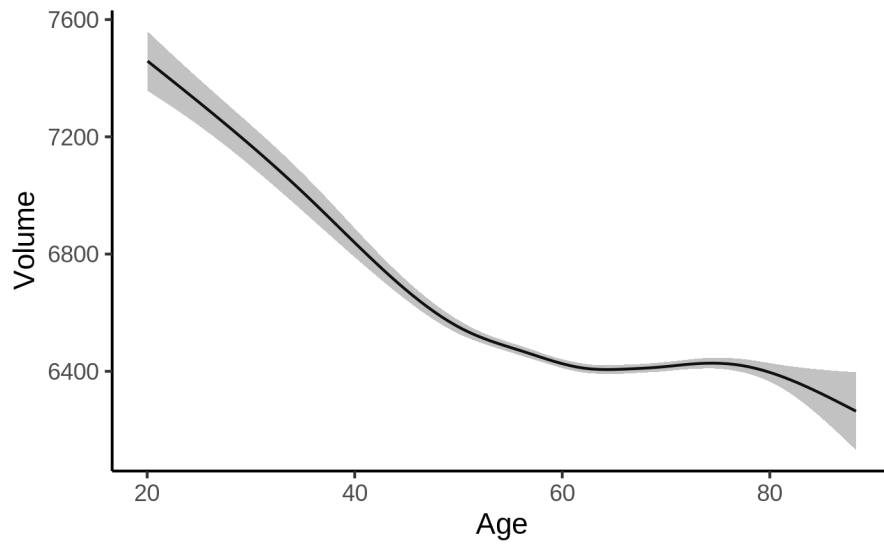

**Effect of sleep**

The chosen model only included the main effect of sleep, and hence the effect does not vary with age. The black dot shows the average sleep duration across all ages in the sample.

Caudate sleep effect (95% CIs)

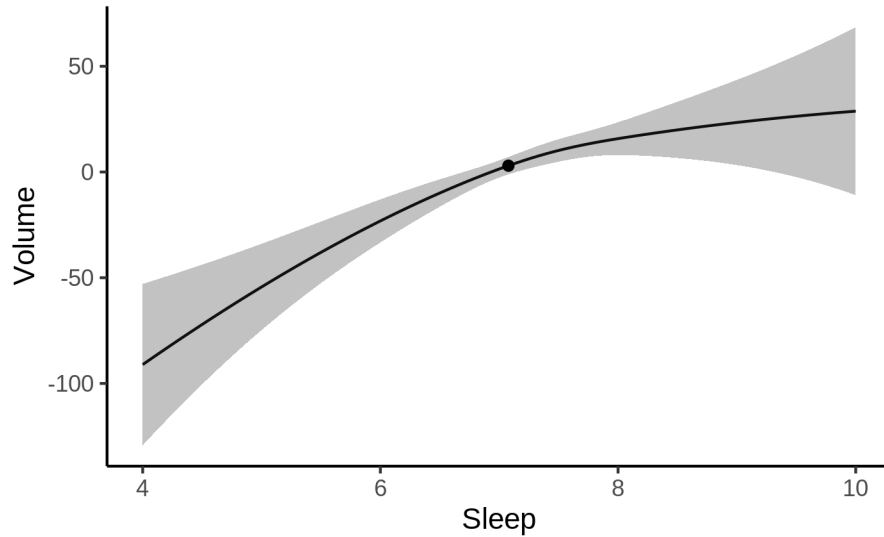

We also show the full interaction model for completeness, although it was not selected.



### Caudate sleep effect (95% CIs)

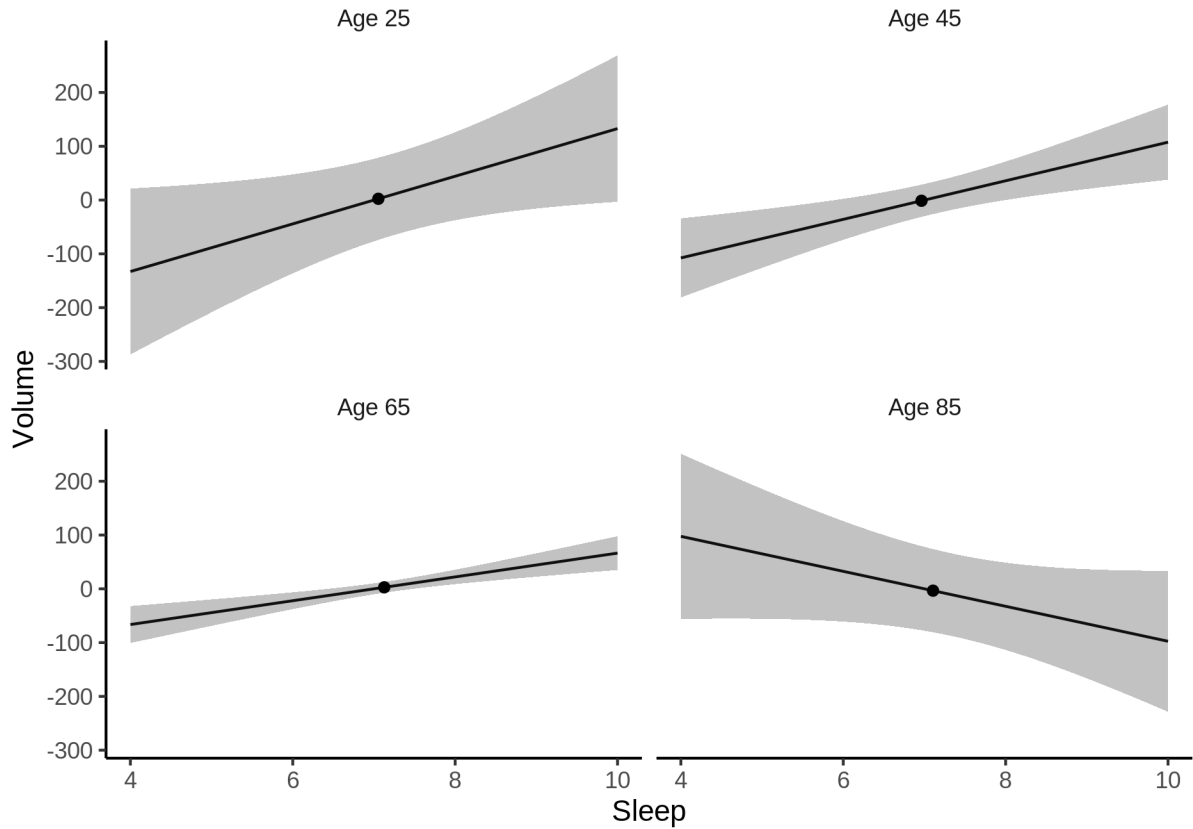

### Deviation from sleep associated with maximal volume

Model with only main effect of sleep was chosen, so we show it for all ages at once. Maximum volume is attained at 10 hours of sleep. The percentage values in the plot are calculated as follows: The maximum at 100 % refers to a person at an arbitrary age with a sleep duration associated with maximum volume. For a female, this volume is 6667 and for a male it is 7210. The other percentage values show how large the expected volume is for someone with other sleep durations. For example, 99 % implies a 1 % reduction.

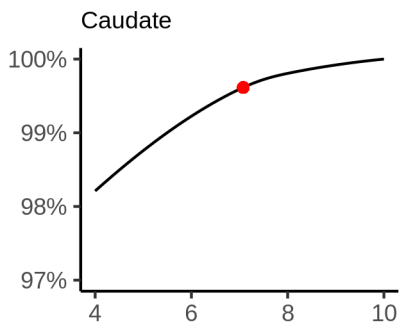

### Comparison of mean sleep and sleep associated with maximum volume

A 95 % confidence interval for the sleep associated with maximum volume is [7.82, 10].

The plot below compares average sleep to the sleep associated with maximum volume.

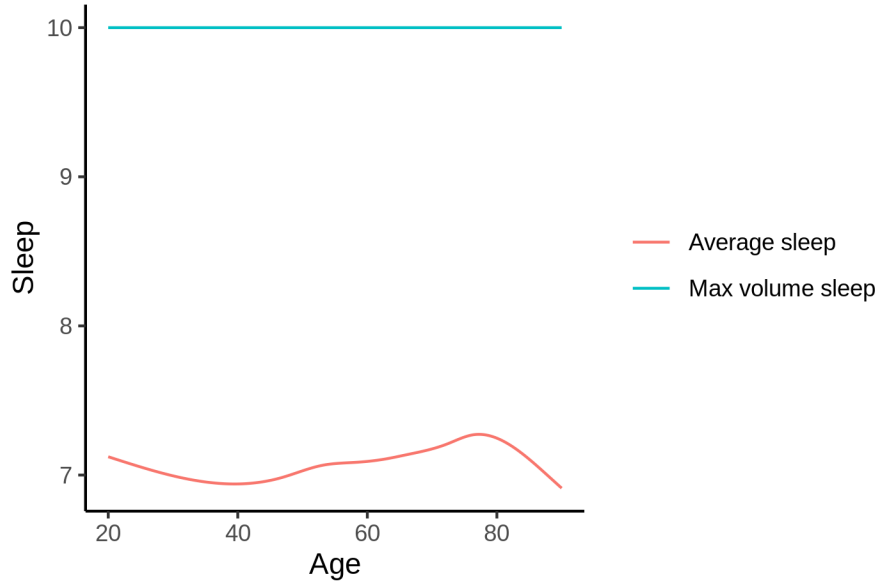

The next plot shows the difference between average sleep and sleep associated with maximum volume. The shaded region is a 95 % confidence interval.

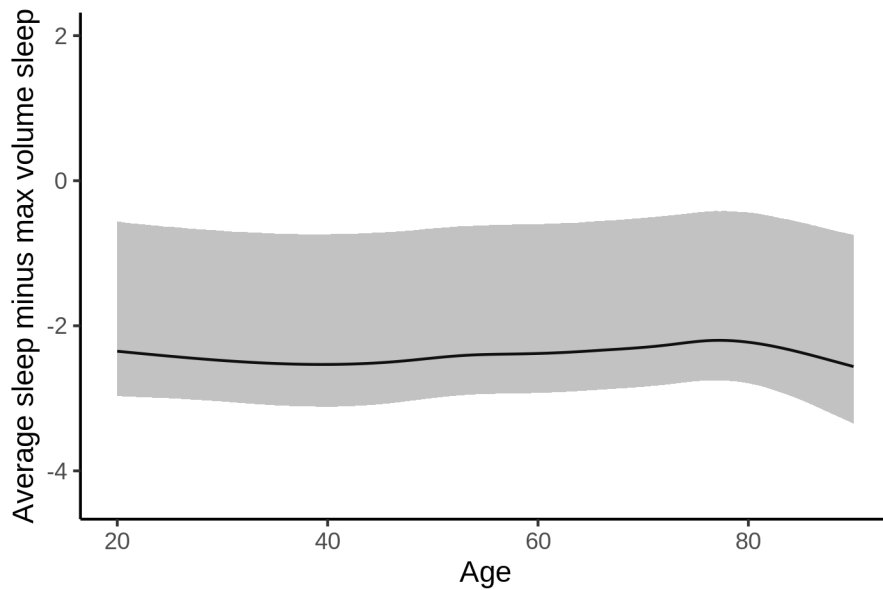

The next plot shows the probability that the sleep duration associated with maximum volume is longer than the average sleep duration, as a function of age. Probability below .05 can be interpreted as evidence that the sleep associated with maximum volume is shorter than the mean sleep, and probability above .95 can be interpreted the opposite way.

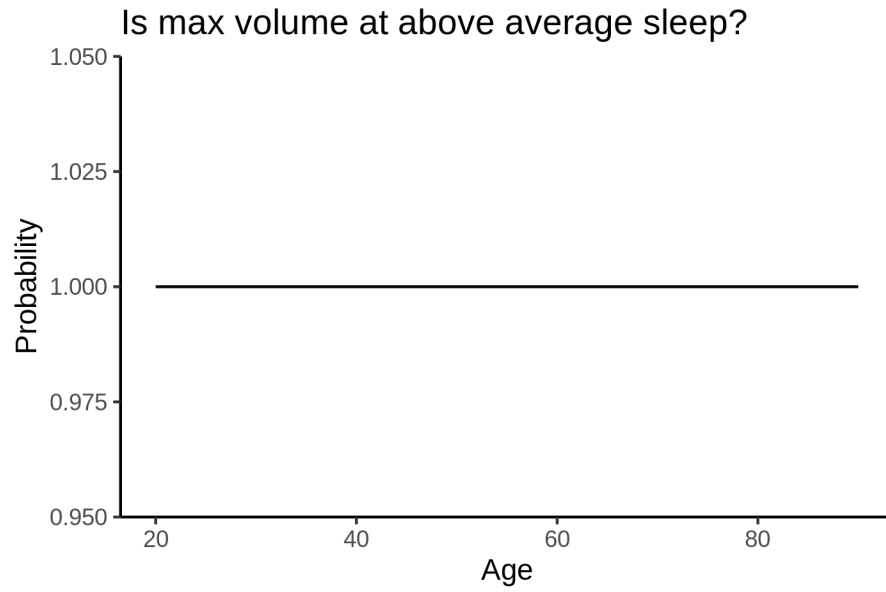

## CC\_Anterior

### Descriptive statistics

| Study | Observations | Unique IDs | Mean age | Age range |
|-------|--------------|------------|----------|-----------|
| HCP   | 974          | 974        | 28.8     | 22 - 37   |
| MPIB  | 677          | 391        | 63.1     | 24 - 83   |
| UB    | 113          | 39         | 70.9     | 64 - 81   |
| UCAM  | 884          | 632        | 55.1     | 20 - 88   |
| UiO   | 1475         | 803        | 49.4     | 20 - 89   |
| UKB   | 45969        | 43132      | 64.5     | 45 - 83   |
| UmU   | 412          | 279        | 62.2     | 25 - 85   |
| UOXF  | 769          | 769        | 69.8     | 60 - 85   |

## Spaghetti plot

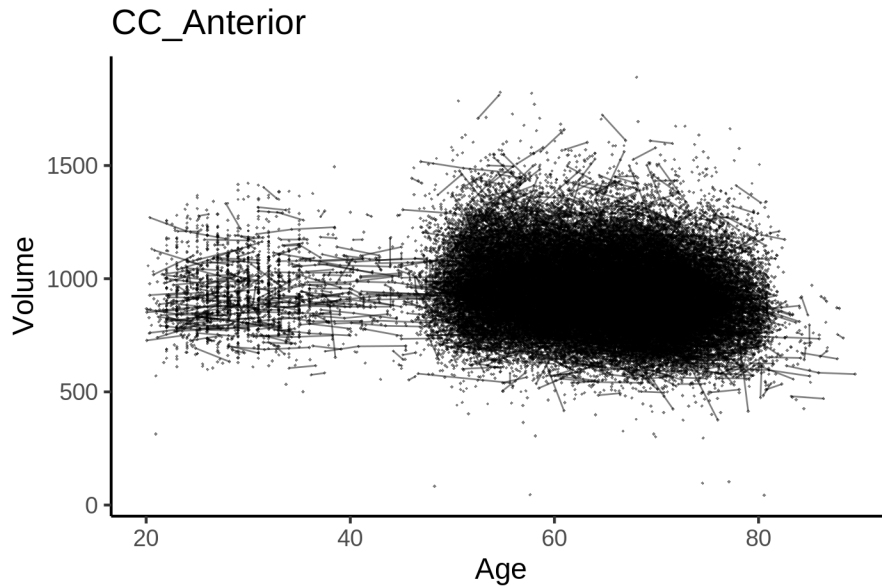

## Models Controlling for ICV

### Model outputs

Model without sleep term

```
##
## Family: gaussian
## Link function: identity
##
## Formula:
## value ~ sex + site + icv + s(age_z, k = 10, bs = "cr")
## <environment: 0x558ad7ccd240>
##
## Parametric coefficients:
##              Estimate Std. Error t value Pr(>|t|)
## (Intercept)  938.2982    8.0511 116.542 < 2e-16 ***
## sexmale      -40.6634    1.6409 -24.781 < 2e-16 ***
## siteMPIB      94.4094   10.2592   9.202 < 2e-16 ***
## siteousAvanto -71.2842    8.2739  -8.616 < 2e-16 ***
## siteousPrisma -31.7765   14.0095  -2.268 0.023321 *
## siteousSkyra  -32.7960    7.8127  -4.198 2.70e-05 ***
## siteUB       -59.2729   24.0473  -2.465 0.013710 *
## siteUCAM     -62.0527    8.8953  -6.976 3.08e-12 ***
## siteUKB       22.4239    8.2575   2.716 0.006618 **
## siteUmU      -10.9414   11.5018  -0.951 0.341469
## siteUOXF     -32.4647    9.7697  -3.323 0.000891 ***
## icv           81.0000    0.8251  98.172 < 2e-16 ***
## ---
## Signif. codes:  0 '***' 0.001 '**' 0.01 '*' 0.05 '.' 0.1 ' ' 1
##
```

```

## Approximate significance of smooth terms:
##           edf Ref.df      F p-value
## s(age_z) 7.379  7.379 130.4 <2e-16 ***
## ---
## Signif. codes:  0 '***' 0.001 '**' 0.01 '*' 0.05 '.' 0.1 ' ' 1
##
## R-sq.(adj) =  0.215
## lmer.REML = 6.478e+05  Scale est. = 1718.9    n = 51273

Model with only main effects of age and sleep

##
## Family: gaussian
## Link function: identity
##
## Formula:
## value ~ sex + site + icv + s(age_z, k = 10, bs = "cr") + s(sleep_z,
##           k = 5, bs = "cr")
## <environment: 0x558ad7ccd240>
##
## Parametric coefficients:
##           Estimate Std. Error t value Pr(>|t|)
## (Intercept)  937.3624     8.0590 116.312 < 2e-16 ***
## sexmale      -40.7085     1.6408 -24.810 < 2e-16 ***
## siteMPIB      95.5652    10.2655   9.309 < 2e-16 ***
## siteousAvanto -70.8321     8.2758  -8.559 < 2e-16 ***
## siteousPrisma -31.4785    14.0088  -2.247 0.02464 *
## siteousSkyra  -32.3471     7.8151  -4.139 3.49e-05 ***
## siteUB        -58.8205    24.0450  -2.446 0.01444 *
## siteUCAM      -61.4874     8.8964  -6.911 4.85e-12 ***
## siteUKB        23.4231     8.2662   2.834 0.00460 **
## siteUmU        -8.5511    11.5279  -0.742 0.45823
## siteUOXF      -31.9830     9.7709  -3.273 0.00106 **
## icv           81.0448     0.8256  98.163 < 2e-16 ***
## ---
## Signif. codes:  0 '***' 0.001 '**' 0.01 '*' 0.05 '.' 0.1 ' ' 1
##
## Approximate significance of smooth terms:
##           edf Ref.df      F p-value
## s(age_z)   7.386  7.386 127.637 <2e-16 ***
## s(sleep_z) 1.649  1.649   7.825  0.0101 *
## ---
## Signif. codes:  0 '***' 0.001 '**' 0.01 '*' 0.05 '.' 0.1 ' ' 1
##
## R-sq.(adj) =  0.215
## lmer.REML = 6.4779e+05  Scale est. = 1718.8    n = 51273

Model with full interaction between age and sleep

##
## Family: gaussian
## Link function: identity
##
## Formula:
## value ~ sex + site + icv + t2(age_z, sleep_z, k = c(10, 4), bs = "cr")
## <environment: 0x558ad7ccd240>

```

```

##
## Parametric coefficients:
##           Estimate Std. Error t value Pr(>|t|)
## (Intercept)  937.1574     7.9760 117.497 < 2e-16 ***
## sexmale      -40.6707     1.6443 -24.734 < 2e-16 ***
## siteMPIB      95.8570    10.2584   9.344 < 2e-16 ***
## siteousAvanto -70.6390     8.2826  -8.529 < 2e-16 ***
## siteousPrisma -31.6091    14.0325  -2.253  0.02429 *
## siteousSkyra  -32.1757     7.8260  -4.111 3.94e-05 ***
## siteUB       -58.8333    24.0205  -2.449  0.01432 *
## siteUCAM     -61.1803     8.8841  -6.886 5.78e-12 ***
## siteUKB       23.6120     8.1755   2.888  0.00388 **
## siteUmU      -8.2187    11.4935  -0.715  0.47456
## siteUOXF     -31.9516     9.7105  -3.290  0.00100 **
## icv          81.0074     0.8255  98.128 < 2e-16 ***
## ---
## Signif. codes:  0 '***' 0.001 '**' 0.01 '*' 0.05 '.' 0.1 ' ' 1
##
## Approximate significance of smooth terms:
##           edf Ref.df    F p-value
## t2(age_z,sleep_z) 11.58 11.58 10.95 <2e-16 ***
## ---
## Signif. codes:  0 '***' 0.001 '**' 0.01 '*' 0.05 '.' 0.1 ' ' 1
##
## R-sq.(adj) =  0.215
## lmer.REML = 6.478e+05  Scale est. = 1718.9    n = 51273

```

## Model comparison

mod\_no\_sleep refers to model without sleep term, mod\_no\_interaction refers to model with only main effect of sleep, and mod\_full refers to model with a full interaction between age and sleep. This is a nested model comparison, and the p-value at a given line refers to comparing the model at the line to the model on the line above. Hence, significance implies that the more complicated model is supported on statistical grounds.

To be even more specific, the p-value on the second row tests whether there is an association between sleep and volume. The p-value on the third row tests whether this association depends on age.

```

## Data: NULL
## Models:
## ml$mod_no_sleep$mer: NULL
## ml$mod_no_interaction$mer: NULL
## ml$mod_full$mer: NULL
##           npar    AIC    BIC logLik deviance Chisq Df Pr(>Chisq)
## ml$mod_no_sleep$mer      16 647834 647975 -323901    647802
## ml$mod_no_interaction$mer  18 647829 647988 -323896    647793 8.8945  2    0.01171 *
## ml$mod_full$mer          20 647835 648012 -323898    647795 0.0000  2    1.00000
## ---
## Signif. codes:  0 '***' 0.001 '**' 0.01 '*' 0.05 '.' 0.1 ' ' 1

```

We chose the model based on the likelihood ratio test with 5 % significance level, which was mod\_no\_interaction.

### Lifespan brain trajectory

The trajectory shown is from the chosen model `mod_no_interaction`.

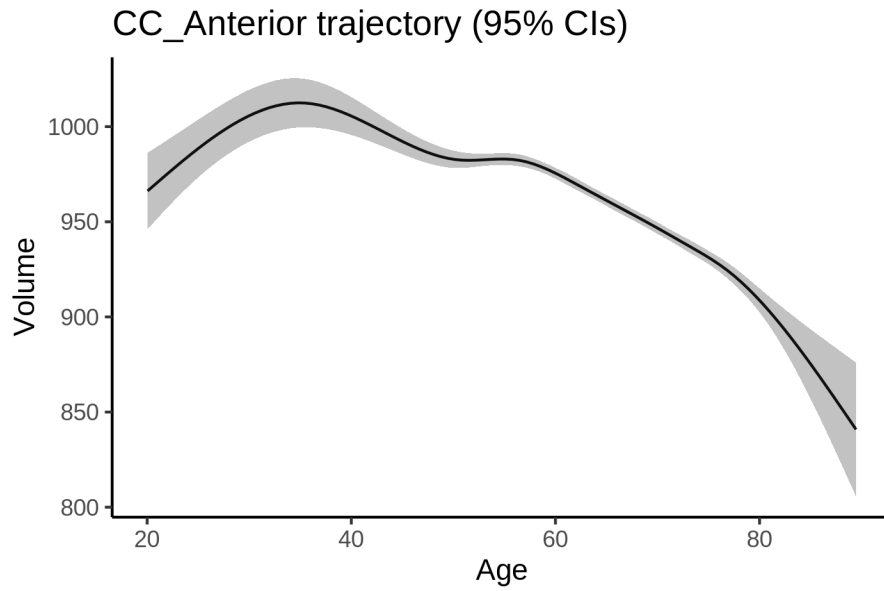

### Effect of sleep

The chosen model only included the main effect of sleep, and hence the effect does not vary with age. The black dot shows the average sleep duration across all ages in the sample.

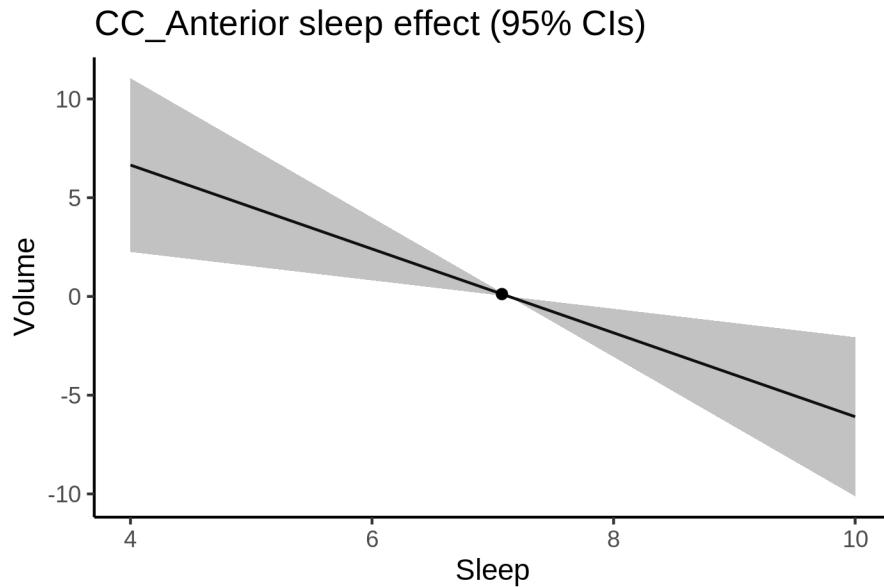

We also show the full interaction model for completeness, although it was not selected.

### CC\_Anterior sleep effect (95% CIs)

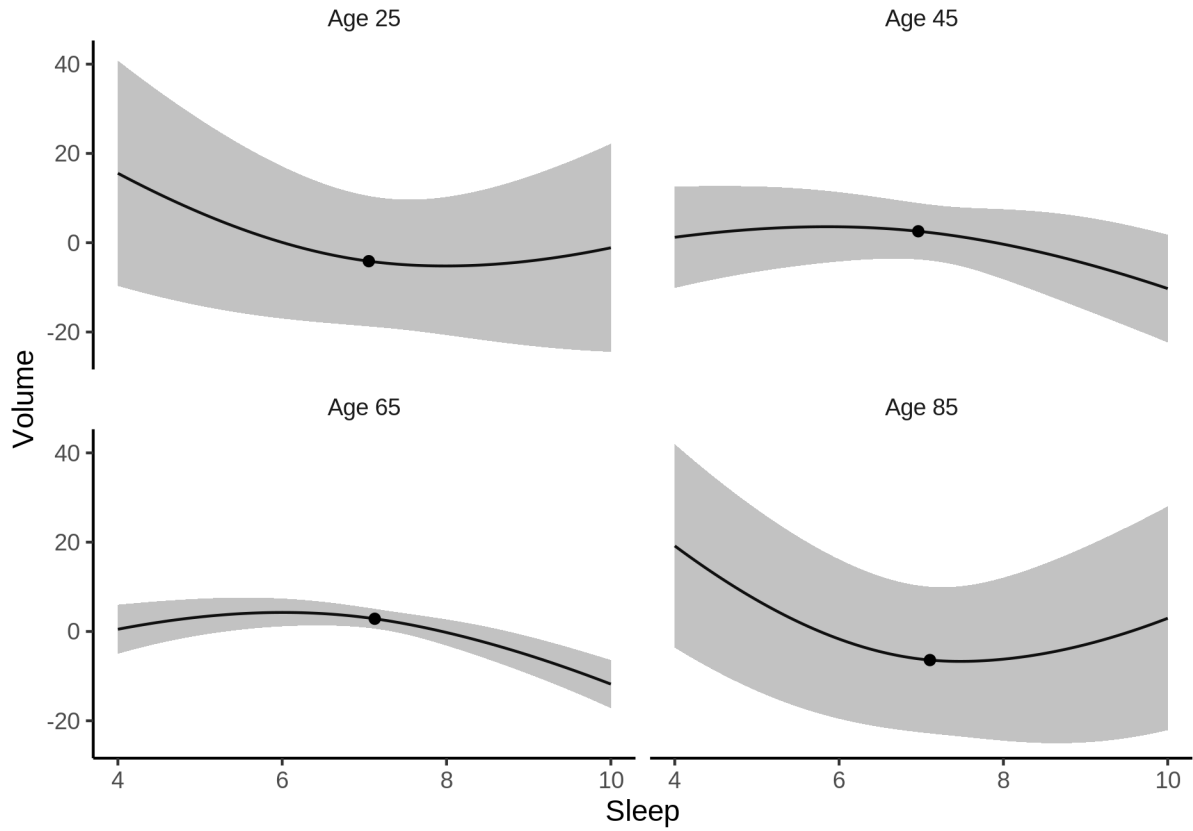

### Deviation from sleep associated with maximal volume

Model with only main effect of sleep was chosen, so we show it for all ages at once. Maximum volume is attained at 4 hours of sleep. The percentage values in the plot are calculated as follows: The maximum at 100 % refers to a person at an arbitrary age with a sleep duration associated with maximum volume. For a female, this volume is 962 and for a male it is 921. The other percentage values show how large the expected volume is for someone with other sleep durations. For example, 99 % implies a 1 % reduction.

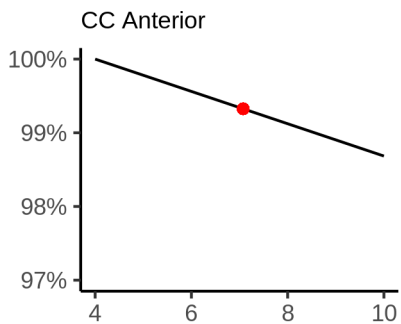



### Comparison of mean sleep and sleep associated with maximum volume

A 95 % confidence interval for the sleep associated with maximum volume is [4, 6.24].

The plot below compares average sleep to the sleep associated with maximum volume.

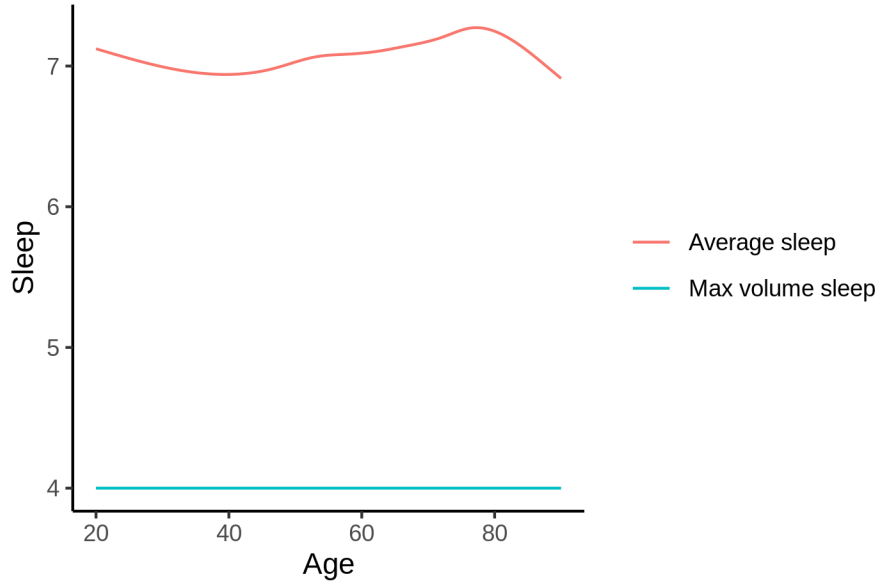

The next plot shows the difference between average sleep and sleep associated with maximum volume. The shaded region is a 95 % confidence interval.

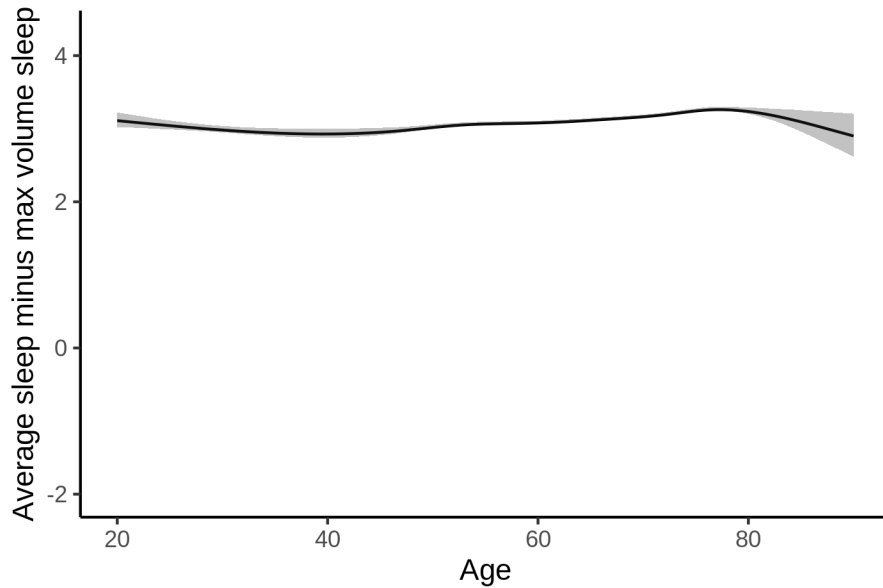

The next plot shows the probability that the sleep duration associated with maximum volume is longer than the average sleep duration, as a function of age. Probability below .05 can be interpreted as evidence that the sleep associated with maximum volume is shorter than the mean sleep, and probability above .95 can be interpreted the opposite way.

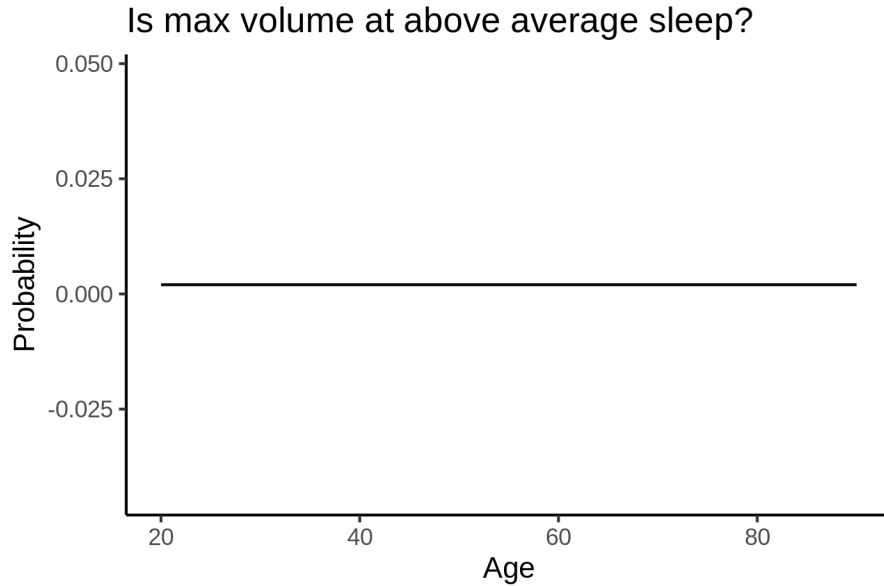

## Controlling for covariates

Below is the output for a model in which we only include data with income and education.

```
##
## Family: gaussian
## Link function: identity
##
## Formula:
## value ~ sex + site + s(age_z, k = 10, bs = "cr") + s(sleep_z,
##   k = 5, bs = "cr") + icv
## <environment: 0x558ada8f8bd8>
##
## Parametric coefficients:
##           Estimate Std. Error t value Pr(>|t|)
## (Intercept) 1070.007    19.035  56.214 < 2e-16 ***
## sexmale     -43.547     2.102 -20.719 < 2e-16 ***
## siteousAvanto -202.615    23.314  -8.691 < 2e-16 ***
## siteousPrisma -143.408    23.506  -6.101 1.07e-09 ***
## siteousSkyra  -147.718    20.647  -7.154 8.58e-13 ***
## siteUKB      -109.953    18.998  -5.788 7.21e-09 ***
## siteUOXF     -149.823    21.405  -7.000 2.62e-12 ***
## icv          84.895     1.080  78.609 < 2e-16 ***
## ---
## Signif. codes:  0 '***' 0.001 '**' 0.01 '*' 0.05 '.' 0.1 ' ' 1
##
## Approximate significance of smooth terms:
##           edf Ref.df    F p-value
## s(age_z)   4.989  4.989 83.70 <2e-16 ***
## s(sleep_z) 1.705  1.705  2.23  0.0679 .
## ---
## Signif. codes:  0 '***' 0.001 '**' 0.01 '*' 0.05 '.' 0.1 ' ' 1
##
```

```
## R-sq.(adj) = 0.211
## lmer.REML = 3.9487e+05 Scale est. = 2119.2 n = 31188
```

Below is the output for a model in which we control for the main effects of income and education.

```
##
## Family: gaussian
## Link function: identity
##
## Formula:
## value ~ sex + site + s(age_z, k = 10, bs = "cr") + s(sleep_z,
##     k = 5, bs = "cr") + icv + income_scaled + education_scaled
## <environment: 0x558ada8f8bd8>
##
## Parametric coefficients:
##           Estimate Std. Error t value Pr(>|t|)
## (Intercept) 1069.8153   19.1589  55.839 < 2e-16 ***
## sexmale      -43.5166    2.1080 -20.643 < 2e-16 ***
## siteousAvanto -202.7119   23.3200  -8.693 < 2e-16 ***
## siteousPrisma -143.4438   23.5081  -6.102 1.06e-09 ***
## siteousSkyra  -147.8118   20.6533  -7.157 8.44e-13 ***
## siteUKB      -110.0777   19.0100  -5.791 7.08e-09 ***
## siteUOXF     -149.8169   21.4174  -6.995 2.70e-12 ***
## icv           84.8856    1.0894  77.922 < 2e-16 ***
## income_scaled -0.2847    2.5045  -0.114 0.909
## education_scaled 0.5576    2.9587  0.188 0.851
## ---
## Signif. codes:  0 '***' 0.001 '**' 0.01 '*' 0.05 '.' 0.1 ' ' 1
##
## Approximate significance of smooth terms:
##           edf Ref.df      F p-value
## s(age_z)   4.992  4.992 76.609 <2e-16 ***
## s(sleep_z) 1.703  1.703  2.239 0.0674 .
## ---
## Signif. codes:  0 '***' 0.001 '**' 0.01 '*' 0.05 '.' 0.1 ' ' 1
##
## R-sq.(adj) = 0.211
## lmer.REML = 3.9486e+05 Scale est. = 2119.2 n = 31188
```

We also included interaction effects between sleep duration and education and income, in another model. The output is shown below, and the interaction terms are `income_scaled:sleep_z` and `education_scaled:sleep_z`.

```
##
## Family: gaussian
## Link function: identity
##
## Formula:
## value ~ sex + site + s(age_z, k = 10, bs = "cr") + s(sleep_z,
##     k = 5, bs = "cr") + icv + income_scaled + education_scaled +
##     income_scaled:sleep_z + education_scaled:sleep_z
## <environment: 0x558ada8f8bd8>
##
## Parametric coefficients:
##           Estimate Std. Error t value Pr(>|t|)
## (Intercept) 1069.7661   19.1603  55.832 < 2e-16 ***
```

```

## sexmale                -43.4054      2.1095 -20.576 < 2e-16 ***
## siteousAvanto          -202.5312     23.3209  -8.685 < 2e-16 ***
## siteousPrisma         -142.9873     23.5108  -6.082 1.20e-09 ***
## siteousSkyra          -147.6294     20.6540  -7.148 9.01e-13 ***
## siteUKB                -110.0328     19.0123  -5.787 7.21e-09 ***
## siteUOXF              -149.8447     21.4237  -6.994 2.72e-12 ***
## icv                    84.8737       1.0895  77.904 < 2e-16 ***
## income_scaled          -0.3927       2.5056  -0.157 0.875
## education_scaled        0.6298       2.9591   0.213 0.831
## income_scaled:sleep_z   3.2233       2.4815   1.299 0.194
## education_scaled:sleep_z -2.5041       2.8678  -0.873 0.383
## ---
## Signif. codes:  0 '***' 0.001 '**' 0.01 '*' 0.05 '.' 0.1 ' ' 1
##
## Approximate significance of smooth terms:
##           edf Ref.df      F p-value
## s(age_z)  4.997  4.997 76.708 <2e-16 ***
## s(sleep_z) 1.644  1.644  0.355  0.544
## ---
## Signif. codes:  0 '***' 0.001 '**' 0.01 '*' 0.05 '.' 0.1 ' ' 1
##
## R-sq.(adj) =  0.211
## lmer.REML = 3.9485e+05  Scale est. = 2119.2    n = 31188

```

We did the same controlling for BMI. Below is the model with no covariates but only keeping data with BMI.

```

##
## Family: gaussian
## Link function: identity
##
## Formula:
## value ~ sex + site + s(age_z, k = 10, bs = "cr") + s(sleep_z,
##           k = 5, bs = "cr") + icv
## <environment: 0x558adb36c900>
##
## Parametric coefficients:
##           Estimate Std. Error t value Pr(>|t|)
## (Intercept)  876.934    13.626  64.360 < 2e-16 ***
## sexmale      -43.283     2.035 -21.269 < 2e-16 ***
## siteousPrisma  42.906    17.919   2.394 0.016654 *
## siteousSkyra  46.658    11.074   4.213 2.52e-05 ***
## siteUCAM       7.328    14.327   0.511 0.609011
## siteUKB       83.057    13.726   6.051 1.45e-09 ***
## siteUmU       56.345    16.065   3.507 0.000453 ***
## icv           84.939     1.049  80.992 < 2e-16 ***
## ---
## Signif. codes:  0 '***' 0.001 '**' 0.01 '*' 0.05 '.' 0.1 ' ' 1
##
## Approximate significance of smooth terms:
##           edf Ref.df      F p-value
## s(age_z)  5.019  5.019 98.572 <2e-16 ***
## s(sleep_z) 1.290  1.290  4.145 0.0528 .
## ---
## Signif. codes:  0 '***' 0.001 '**' 0.01 '*' 0.05 '.' 0.1 ' ' 1
##

```

```
## R-sq.(adj) = 0.214
## lmer.REML = 4.2259e+05 Scale est. = 1983.1 n = 33432
```

Below is the model output with main effect.

```
##
## Family: gaussian
## Link function: identity
##
## Formula:
## value ~ sex + site + s(age_z, k = 10, bs = "cr") + s(sleep_z,
##     k = 5, bs = "cr") + icv + bmi
## <environment: 0x558adb36c900>
##
## Parametric coefficients:
##           Estimate Std. Error t value Pr(>|t|)
## (Intercept)  926.3514    14.5003  63.885 < 2e-16 ***
## sexmale      -41.7136     2.0380 -20.468 < 2e-16 ***
## siteousPrisma 44.9219    17.9037   2.509 0.012109 *
## siteousSkyra  46.9869    11.0718   4.244 2.20e-05 ***
## siteUCAM      8.5913     14.3167   0.600 0.548448
## siteUKB       84.6928    13.7200   6.173 6.78e-10 ***
## siteUmU       58.5390    16.0525   3.647 0.000266 ***
## icv           85.2279     1.0473  81.380 < 2e-16 ***
## bmi          -1.9640     0.1977  -9.935 < 2e-16 ***
## ---
## Signif. codes:  0 '***' 0.001 '**' 0.01 '*' 0.05 '.' 0.1 ' ' 1
##
## Approximate significance of smooth terms:
##           edf Ref.df      F p-value
## s(age_z)   5.079  5.079 98.899 <2e-16 ***
## s(sleep_z) 1.000  1.000  6.561  0.0104 *
## ---
## Signif. codes:  0 '***' 0.001 '**' 0.01 '*' 0.05 '.' 0.1 ' ' 1
##
## R-sq.(adj) = 0.217
## lmer.REML = 4.225e+05 Scale est. = 1982.5 n = 33432
```

Next is the model with BMI-sleep interaction.

```
##
## Family: gaussian
## Link function: identity
##
## Formula:
## value ~ sex + site + s(age_z, k = 10, bs = "cr") + s(sleep_z,
##     k = 5, bs = "cr") + icv + bmi + bmi:sleep_z
## <environment: 0x558adb36c900>
##
## Parametric coefficients:
##           Estimate Std. Error t value Pr(>|t|)
## (Intercept)  926.9231    14.5068  63.896 < 2e-16 ***
## sexmale      -41.7235     2.0380 -20.473 < 2e-16 ***
## siteousPrisma 44.9119    17.9035   2.509 0.01213 *
## siteousSkyra  46.9251    11.0717   4.238 2.26e-05 ***
## siteUCAM      8.3675     14.3176   0.584 0.55894
```

```

## siteUKB      84.4741    13.7210    6.157 7.52e-10 ***
## siteUmU      58.3350    16.0531    3.634 0.00028 ***
## icv          85.2184     1.0473   81.369 < 2e-16 ***
## bmi          -1.9728     0.1978   -9.974 < 2e-16 ***
## bmi:sleep_z  -0.2464     0.1872   -1.317 0.18799
## ---
## Signif. codes:  0 '***' 0.001 '**' 0.01 '*' 0.05 '.' 0.1 ' ' 1
##
## Approximate significance of smooth terms:
##           edf Ref.df      F p-value
## s(age_z)   5.08  5.08 98.689 <2e-16 ***
## s(sleep_z) 1.00  1.00  0.758  0.384
## ---
## Signif. codes:  0 '***' 0.001 '**' 0.01 '*' 0.05 '.' 0.1 ' ' 1
##
## R-sq.(adj) =  0.217
## lmer.REML = 4.225e+05  Scale est. = 1982.5    n = 33432

```

We did the same controlling for depression. Below is the model with no covariates but only keeping data with depression.

```

##
## Family: gaussian
## Link function: identity
##
## Formula:
## value ~ sex + site + s(age_z, k = 10, bs = "cr") + s(sleep_z,
##           k = 5, bs = "cr") + icv
## <environment: 0x558a48df5cd0>
##
## Parametric coefficients:
##           Estimate Std. Error t value Pr(>|t|)
## (Intercept) 1012.299     9.677 104.611 < 2e-16 ***
## sexmale      -43.504     2.048 -21.243 < 2e-16 ***
## siteousAvanto -129.369    21.558  -6.001 1.98e-09 ***
## siteousPrisma -85.761    18.654  -4.597 4.29e-06 ***
## siteousSkyra  -78.864    14.536  -5.425 5.82e-08 ***
## siteUCAM     -129.663    13.223  -9.806 < 2e-16 ***
## siteUKB      -52.529     9.568  -5.490 4.04e-08 ***
## siteUmU      -79.822    13.040  -6.122 9.37e-10 ***
## icv          84.721     1.054  80.385 < 2e-16 ***
## ---
## Signif. codes:  0 '***' 0.001 '**' 0.01 '*' 0.05 '.' 0.1 ' ' 1
##
## Approximate significance of smooth terms:
##           edf Ref.df      F p-value
## s(age_z)   5.189  5.189 88.936 <2e-16 ***
## s(sleep_z) 1.568  1.568  4.952 0.0371 *
## ---
## Signif. codes:  0 '***' 0.001 '**' 0.01 '*' 0.05 '.' 0.1 ' ' 1
##
## R-sq.(adj) =  0.212
## lmer.REML = 4.2136e+05  Scale est. = 1930    n = 33344

```

Below is the model output with main effect.

```

##
## Family: gaussian
## Link function: identity
##
## Formula:
## value ~ sex + site + s(age_z, k = 10, bs = "cr") + s(sleep_z,
##     k = 5, bs = "cr") + icv + depression
## <environment: 0x558a48df5cd0>
##
## Parametric coefficients:
##           Estimate Std. Error t value Pr(>|t|)
## (Intercept) 1011.215      9.720 104.038 < 2e-16 ***
## sexmale     -43.392       2.050 -21.167 < 2e-16 ***
## siteousAvanto -129.911    21.560  -6.025 1.70e-09 ***
## siteousPrisma  -86.240    18.656  -4.623 3.80e-06 ***
## siteousSkyra  -79.485    14.542  -5.466 4.64e-08 ***
## siteUCAM     -129.902    13.224  -9.824 < 2e-16 ***
## siteUKB      -52.090     9.576  -5.440 5.37e-08 ***
## siteUmU      -83.123    13.315  -6.243 4.35e-10 ***
## icv          84.701     1.054  80.355 < 2e-16 ***
## depression   8.945      7.295   1.226  0.22
## ---
## Signif. codes:  0 '***' 0.001 '**' 0.01 '*' 0.05 '.' 0.1 ' ' 1
##
## Approximate significance of smooth terms:
##           edf Ref.df    F p-value
## s(age_z)   5.172  5.172 86.19 <2e-16 ***
## s(sleep_z) 1.750  1.750  4.54  0.0445 *
## ---
## Signif. codes:  0 '***' 0.001 '**' 0.01 '*' 0.05 '.' 0.1 ' ' 1
##
## R-sq.(adj) =  0.212
## lmer.REML = 4.2135e+05  Scale est. = 1929.8    n = 33344

```

Next is the model with depression-sleep interaction.

```

##
## Family: gaussian
## Link function: identity
##
## Formula:
## value ~ sex + site + s(age_z, k = 10, bs = "cr") + s(sleep_z,
##     k = 5, bs = "cr") + icv + depression + depression:sleep_z
## <environment: 0x558a48df5cd0>
##
## Parametric coefficients:
##           Estimate Std. Error t value Pr(>|t|)
## (Intercept) 1011.213      9.720 104.038 < 2e-16 ***
## sexmale     -43.424       2.050 -21.179 < 2e-16 ***
## siteousAvanto -130.159    21.562  -6.037 1.59e-09 ***
## siteousPrisma  -86.484    18.657  -4.635 3.58e-06 ***
## siteousSkyra  -79.723    14.544  -5.482 4.24e-08 ***
## siteUCAM     -130.140    13.226  -9.840 < 2e-16 ***
## siteUKB      -52.077     9.576  -5.438 5.41e-08 ***
## siteUmU      -81.607    13.427  -6.078 1.23e-09 ***

```

```

## icv                84.704      1.054  80.357 < 2e-16 ***
## depression         8.582      7.308   1.174   0.24
## depression:sleep_z -4.690     5.339  -0.878   0.38
## ---
## Signif. codes:  0 '***' 0.001 '**' 0.01 '*' 0.05 '.' 0.1 ' ' 1
##
## Approximate significance of smooth terms:
##           edf Ref.df      F p-value
## s(age_z)  5.162  5.162 86.387 <2e-16 ***
## s(sleep_z) 1.744  1.744  2.466   0.187
## ---
## Signif. codes:  0 '***' 0.001 '**' 0.01 '*' 0.05 '.' 0.1 ' ' 1
##
## R-sq.(adj) =  0.212
## lmer.REML = 4.2135e+05  Scale est. = 1929.9    n = 33344

```

The plot below shows the sleep-volume curve for the original model and for the model with main effects of SES.

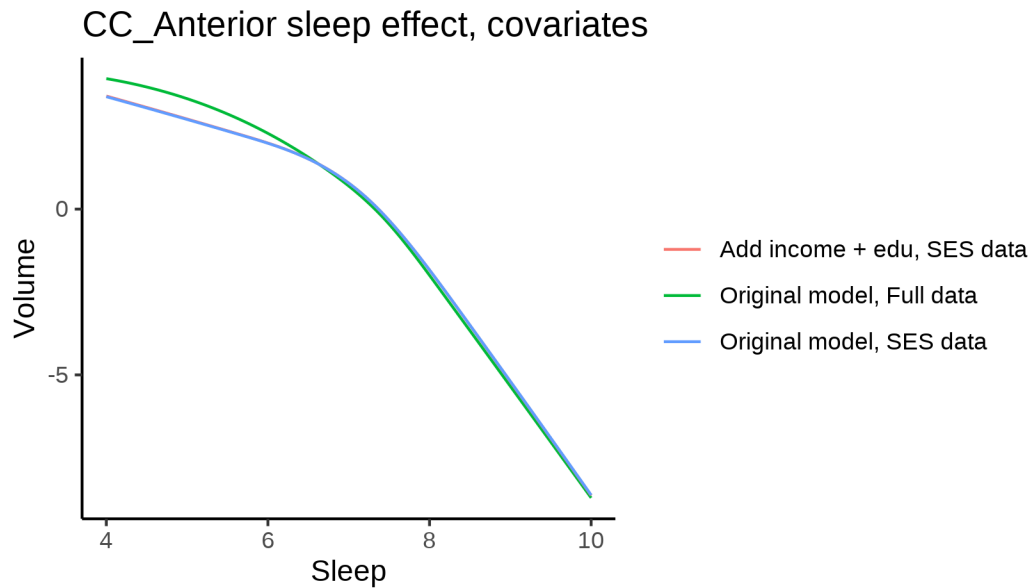

The plot below shows the sleep-volume curve for the original model and for the model with main effects of BMI.



### CC\_Anterior sleep effect, covariates

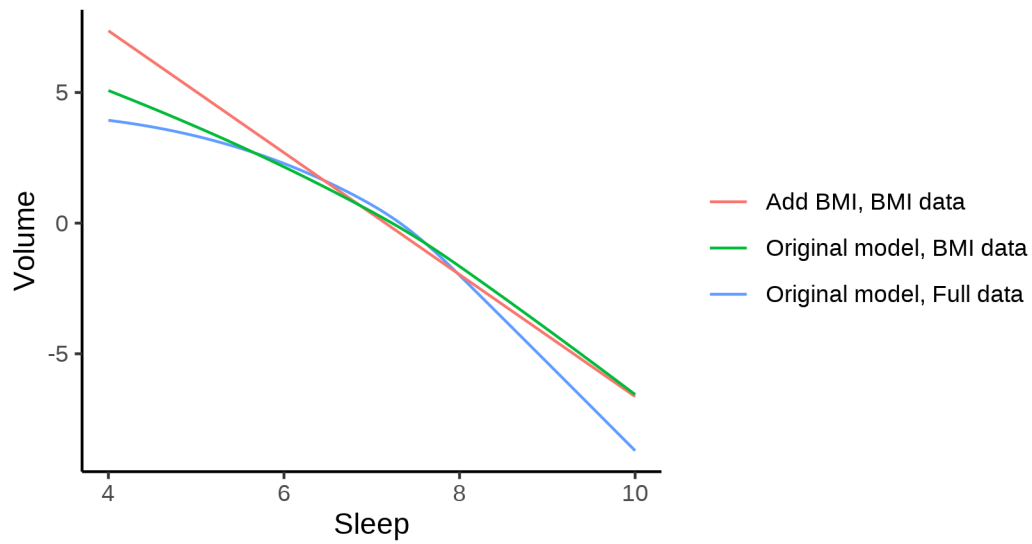

The plot below shows the sleep-volume curve for the original model and for the model with main effects of depression.

### CC\_Anterior sleep effect, covariates

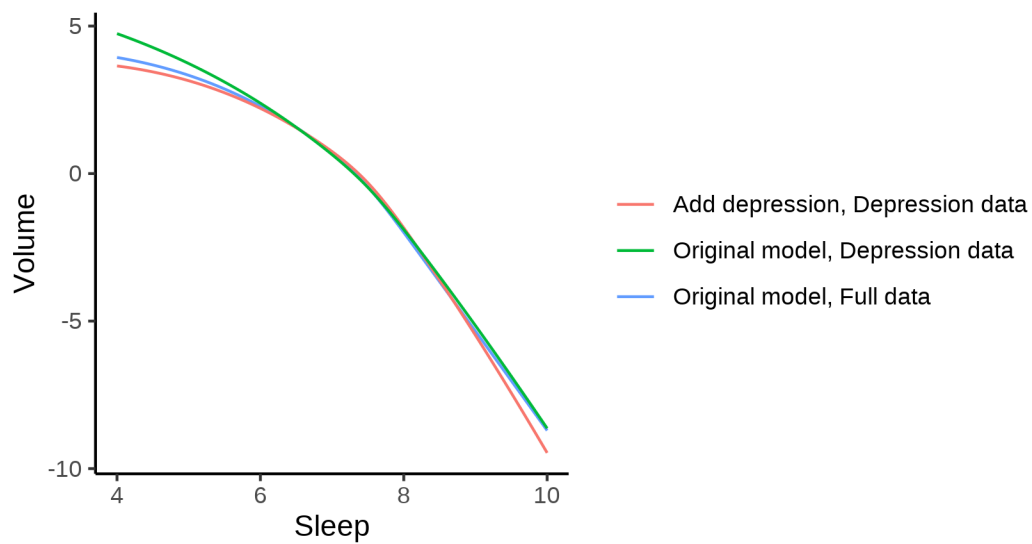

## Models Not controlling for ICV

### Model outputs

Model without sleep term

```
##
## Family: gaussian
## Link function: identity
##
## Formula:
```

```

## value ~ sex + site + s(age_z, k = 10, bs = "cr")
## <environment: 0x558ad80a4f08>
##
## Parametric coefficients:
##           Estimate Std. Error t value Pr(>|t|)
## (Intercept)   893.135      8.646 103.303 < 2e-16 ***
## sexmale       51.234       1.477  34.699 < 2e-16 ***
## siteMPIB     -34.977     11.083  -3.156 0.001602 **
## siteousAvanto -36.043      8.930  -4.036 5.44e-05 ***
## siteousPrisma -13.435     15.191  -0.884 0.376461
## siteousSkyra  -27.290      8.500  -3.211 0.001326 **
## siteUB       -82.619     26.367  -3.133 0.001729 **
## siteUCAM     -57.205      9.669  -5.916 3.31e-09 ***
## siteUKB      25.552       8.878   2.878 0.004004 **
## siteUmU     -43.101     12.516  -3.444 0.000574 ***
## siteUOXF    -50.780     10.564  -4.807 1.54e-06 ***
## ---
## Signif. codes:  0 '***' 0.001 '**' 0.01 '*' 0.05 '.' 0.1 ' ' 1
##
## Approximate significance of smooth terms:
##           edf Ref.df      F p-value
## s(age_z) 6.313  6.313 200.3 <2e-16 ***
## ---
## Signif. codes:  0 '***' 0.001 '**' 0.01 '*' 0.05 '.' 0.1 ' ' 1
##
## R-sq.(adj) =  0.0585
## lmer.REML = 6.566e+05  Scale est. = 1804.2    n = 51273

```

Model with only main effects of age and sleep

```

##
## Family: gaussian
## Link function: identity
##
## Formula:
## value ~ sex + site + s(age_z, k = 10, bs = "cr") + s(sleep_z,
##           k = 5, bs = "cr")
## <environment: 0x558ad80a4f08>
##
## Parametric coefficients:
##           Estimate Std. Error t value Pr(>|t|)
## (Intercept)   894.111      8.652 103.342 < 2e-16 ***
## sexmale       51.001       1.477  34.530 < 2e-16 ***
## siteMPIB     -34.718     11.085  -3.132 0.001738 **
## siteousAvanto -36.847      8.931  -4.126 3.70e-05 ***
## siteousPrisma -14.028     15.187  -0.924 0.355677
## siteousSkyra  -28.169      8.501  -3.314 0.000921 ***
## siteUB       -81.746     26.358  -3.101 0.001927 **
## siteUCAM     -57.105      9.667  -5.907 3.50e-09 ***
## siteUKB      24.632       8.884   2.773 0.005565 **
## siteUmU     -42.831     12.540  -3.416 0.000637 ***
## siteUOXF    -51.176     10.560  -4.846 1.26e-06 ***
## ---
## Signif. codes:  0 '***' 0.001 '**' 0.01 '*' 0.05 '.' 0.1 ' ' 1
##

```

```

## Approximate significance of smooth terms:
##           edf Ref.df      F p-value
## s(age_z)  6.292  6.292 195.855 < 2e-16 ***
## s(sleep_z) 3.407  3.407   8.035 8.74e-06 ***
## ---
## Signif. codes:  0 '***' 0.001 '**' 0.01 '*' 0.05 '.' 0.1 ' ' 1
##
## R-sq.(adj) =  0.0591
## lmer.REML = 6.5658e+05  Scale est. = 1804.2    n = 51273

Model with full interaction between age and sleep

##
## Family: gaussian
## Link function: identity
##
## Formula:
## value ~ sex + site + t2(age_z, sleep_z, k = c(10, 4), bs = "cr")
## <environment: 0x558ad80a4f08>
##
## Parametric coefficients:
##           Estimate Std. Error t value Pr(>|t|)
## (Intercept)   895.300     8.600 104.107 < 2e-16 ***
## sexmale        51.332     1.480  34.689 < 2e-16 ***
## siteMPIB       -37.092    11.090  -3.345 0.000824 ***
## siteousAvanto  -37.252     8.952  -4.161 3.17e-05 ***
## siteousPrisma -14.550    15.216  -0.956 0.338963
## siteousSkyra  -28.553     8.526  -3.349 0.000811 ***
## siteUB         -85.278    26.348  -3.237 0.001210 **
## siteUCAM       -58.606     9.671  -6.060 1.37e-09 ***
## siteUKB        23.258     8.825   2.636 0.008403 **
## siteUmU        -44.655    12.522  -3.566 0.000363 ***
## siteUOXF       -53.305    10.528  -5.063 4.13e-07 ***
## ---
## Signif. codes:  0 '***' 0.001 '**' 0.01 '*' 0.05 '.' 0.1 ' ' 1
##
## Approximate significance of smooth terms:
##           edf Ref.df      F p-value
## t2(age_z,sleep_z) 10.32  10.32 11.74 <2e-16 ***
## ---
## Signif. codes:  0 '***' 0.001 '**' 0.01 '*' 0.05 '.' 0.1 ' ' 1
##
## R-sq.(adj) =  0.0589
## lmer.REML = 6.5659e+05  Scale est. = 1804.5    n = 51273

```

## Model comparison

`mod_no_sleep` refers to model without sleep term, `mod_no_interaction` refers to model with only main effect of sleep, and `mod_full` refers to model with a full interaction between age and sleep. This is a nested model comparison, and the p-value at a given line refers to comparing the model at the line to the model on the line above. Hence, significance implies that the more complicated model is supported on statistical grounds.

To be even more specific, the p-value on the second row tests whether there is an association between sleep and volume. The p-value on the third row tests whether this association depends on age.

```

## Data: NULL
## Models:
## ml$mod_no_sleep$mer: NULL
## ml$mod_no_interaction$mer: NULL
## ml$mod_full$mer: NULL
##
##          npar    AIC    BIC  logLik deviance  Chisq Df Pr(>Chisq)
## ml$mod_no_sleep$mer      15 656628 656760 -328299   656598
## ml$mod_no_interaction$mer 17 656610 656760 -328288   656576 21.778  2 1.867e-05 ***
## ml$mod_full$mer          19 656623 656791 -328293   656585  0.000  2          1
## ---
## Signif. codes:  0 '***' 0.001 '**' 0.01 '*' 0.05 '.' 0.1 ' ' 1

```

We chose the model based on the likelihood ratio test with 5 % significance level, which was mod\_no\_interaction.

### Lifespan brain trajectory

The trajectory shown is from the chosen model mod\_no\_interaction\_no\_icv.

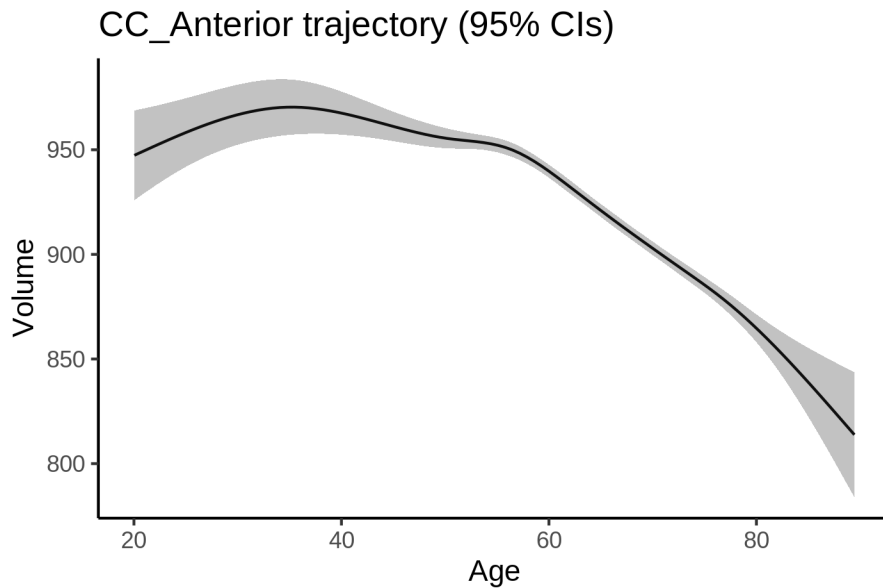

### Effect of sleep

The chosen model only included the main effect of sleep, and hence the effect does not vary with age. The black dot shows the average sleep duration across all ages in the sample.

CC\_Anterior sleep effect (95% CIs)

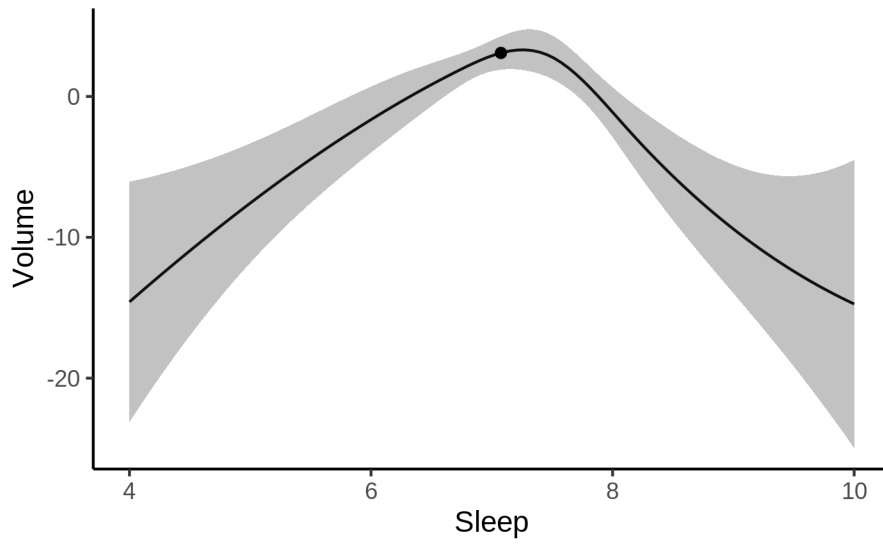

We also show the full interaction model for completeness, although it was not selected.

CC\_Anterior sleep effect (95% CIs)

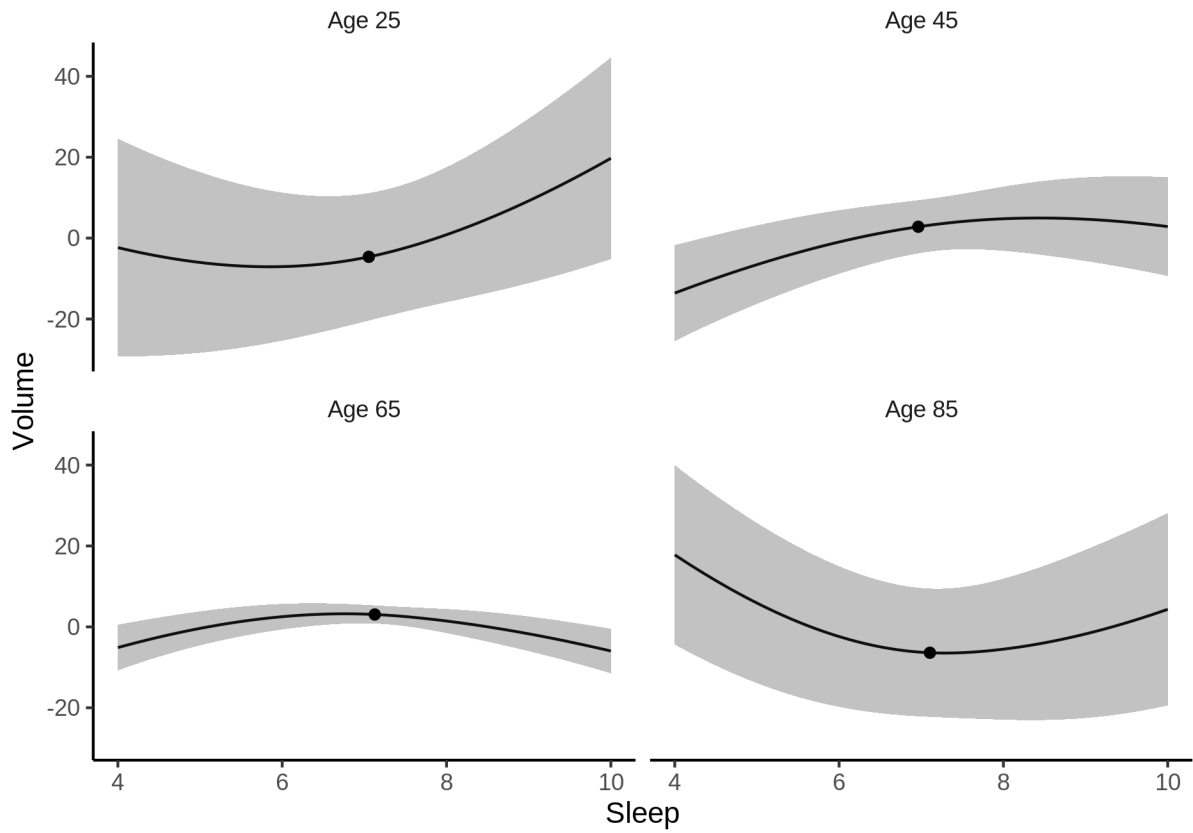

### Deviation from sleep associated with maximal volume

Model with only main effect of sleep was chosen, so we show it for all ages at once. Maximum volume is attained at 7.3 hours of sleep. The percentage values in the plot are calculated as follows: The maximum at 100 % refers to a person at an arbitrary age with a sleep duration associated with maximum volume. For a female, this volume is 926 and for a male it is 977. The other percentage values show how large the expected volume is for someone with other sleep durations. For example, 99 % implies a 1 % reduction.

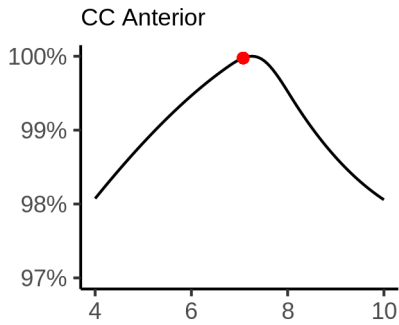

### Comparison of mean sleep and sleep associated with maximum volume

A 95 % confidence interval for the sleep associated with maximum volume is [7.03, 7.39].

The plot below compares average sleep to the sleep associated with maximum volume.

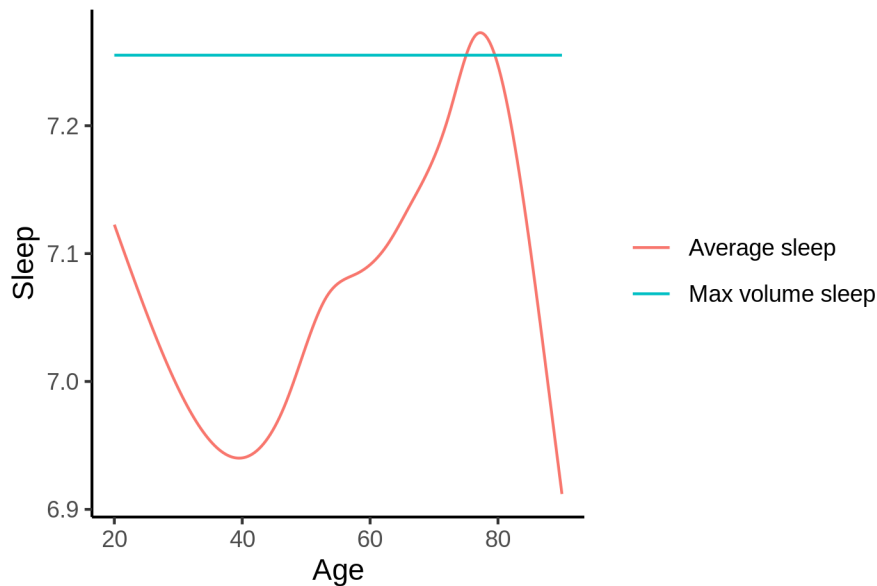

The next plot shows the difference between average sleep and sleep associated with maximum volume. The shaded region is a 95 % confidence interval.

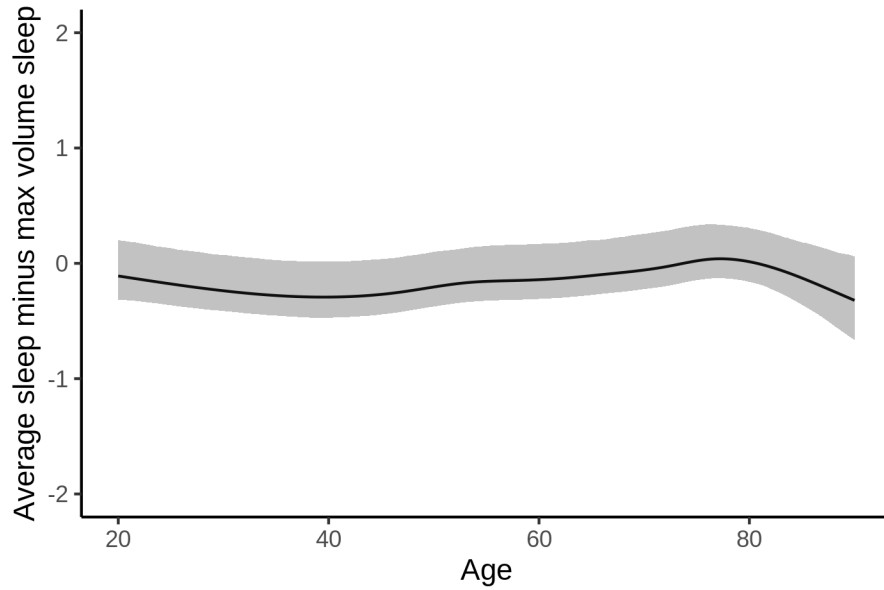

The next plot shows the probability that the sleep duration associated with maximum volume is longer than the average sleep duration, as a function of age. Probability below .05 can be interpreted as evidence that the sleep associated with maximum volume is shorter than the mean sleep, and probability above .95 can be interpreted the opposite way.

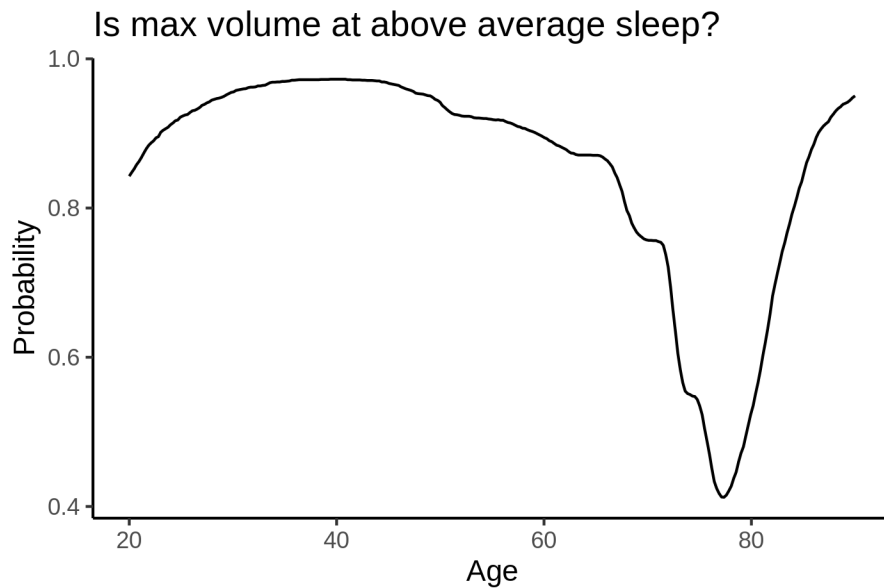

## CC\_Central

### Descriptive statistics

| Study | Observations | Unique IDs | Mean age | Age range |
|-------|--------------|------------|----------|-----------|
| HCP   | 974          | 974        | 28.8     | 22 - 37   |
| MPIB  | 677          | 391        | 63.1     | 24 - 83   |

| Study | Observations | Unique IDs | Mean age | Age range |
|-------|--------------|------------|----------|-----------|
| UB    | 113          | 39         | 70.9     | 64 - 81   |
| UCAM  | 883          | 632        | 55.1     | 20 - 88   |
| UiO   | 1475         | 803        | 49.4     | 20 - 89   |
| UKB   | 45975        | 43135      | 64.5     | 45 - 83   |
| UmU   | 412          | 279        | 62.2     | 25 - 85   |
| UOXF  | 769          | 769        | 69.8     | 60 - 85   |

## Spaghetti plot

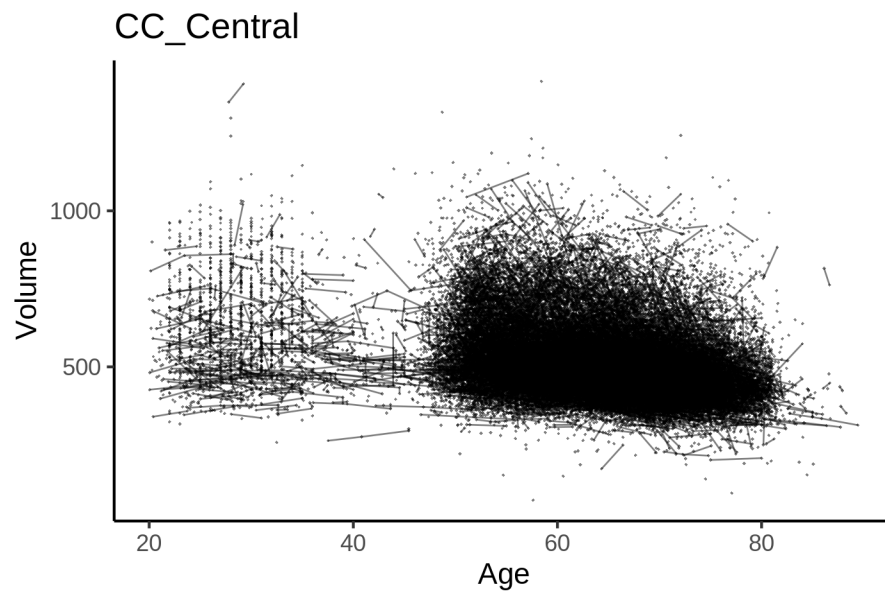

## Models Controlling for ICV

### Model outputs

Model without sleep term

```
##
## Family: gaussian
## Link function: identity
##
## Formula:
## value ~ sex + site + icv + s(age_z, k = 10, bs = "cr")
## <environment: 0x558a47d30568>
##
## Parametric coefficients:
##              Estimate Std. Error t value Pr(>|t|)
## (Intercept)  591.2557    6.1119  96.739 < 2e-16 ***
## sexmale      -18.8030    1.2657 -14.856 < 2e-16 ***
## siteMPIB     -66.5837    7.8616  -8.470 < 2e-16 ***
## siteousAvanto -149.3246    6.4166 -23.272 < 2e-16 ***
## siteousPrisma -68.2283   10.9082  -6.255 4.01e-10 ***
## siteousSkyra -156.5680    5.9919 -26.130 < 2e-16 ***
```



```

## siteUB          -115.5241    18.4358  -6.266 3.73e-10 ***
## siteUCAM        -84.2211     6.8119 -12.364 < 2e-16 ***
## siteUKB         -58.6568     6.2648  -9.363 < 2e-16 ***
## siteUmU         -79.5667     8.8112  -9.030 < 2e-16 ***
## siteUOXF        -45.5595     7.4501  -6.115 9.71e-10 ***
## icv             20.4541     0.6367  32.126 < 2e-16 ***
## ---
## Signif. codes:  0 '***' 0.001 '**' 0.01 '*' 0.05 '.' 0.1 ' ' 1
##
## Approximate significance of smooth terms:
##           edf Ref.df      F p-value
## s(age_z)  5.608  5.608 811.4 <2e-16 ***
## ---
## Signif. codes:  0 '***' 0.001 '**' 0.01 '*' 0.05 '.' 0.1 ' ' 1
##
## R-sq.(adj) =  0.146
## lmer.REML = 6.219e+05  Scale est. = 1202.3    n = 51278

Model with only main effects of age and sleep

##
## Family: gaussian
## Link function: identity
##
## Formula:
## value ~ sex + site + icv + s(age_z, k = 10, bs = "cr") + s(sleep_z,
## k = 5, bs = "cr")
## <environment: 0x558a47d30568>
##
## Parametric coefficients:
##           Estimate Std. Error t value Pr(>|t|)
## (Intercept)  590.1206    6.1140  96.519 < 2e-16 ***
## sexmale      -18.8428    1.2655 -14.889 < 2e-16 ***
## siteMPIB     -65.3460    7.8645  -8.309 < 2e-16 ***
## siteousAvanto -148.7233    6.4163 -23.179 < 2e-16 ***
## siteousPrisma -67.8263   10.9067  -6.219 5.05e-10 ***
## siteousSkyra -155.9481    5.9917 -26.027 < 2e-16 ***
## siteUB       -115.1788   18.4315  -6.249 4.16e-10 ***
## siteUCAM     -83.6424    6.8107 -12.281 < 2e-16 ***
## siteUKB      -57.4503    6.2674  -9.167 < 2e-16 ***
## siteUmU      -77.0457    8.8289  -8.727 < 2e-16 ***
## siteUOXF     -44.9763    7.4477  -6.039 1.56e-09 ***
## icv          20.5337    0.6369  32.242 < 2e-16 ***
## ---
## Signif. codes:  0 '***' 0.001 '**' 0.01 '*' 0.05 '.' 0.1 ' ' 1
##
## Approximate significance of smooth terms:
##           edf Ref.df      F p-value
## s(age_z)   5.582  5.582 807.19 < 2e-16 ***
## s(sleep_z) 1.000  1.000  17.06 3.62e-05 ***
## ---
## Signif. codes:  0 '***' 0.001 '**' 0.01 '*' 0.05 '.' 0.1 ' ' 1
##
## R-sq.(adj) =  0.146
## lmer.REML = 6.2188e+05  Scale est. = 1202.2    n = 51278

```

Model with full interaction between age and sleep

```
##
## Family: gaussian
## Link function: identity
##
## Formula:
## value ~ sex + site + icv + t2(age_z, sleep_z, k = c(10, 4), bs = "cr")
## <environment: 0x558a47d30568>
##
## Parametric coefficients:
##           Estimate Std. Error t value Pr(>|t|)
## (Intercept)   590.011      6.140  96.096 < 2e-16 ***
## sexmale       -19.068      1.268 -15.039 < 2e-16 ***
## siteMPIB      -64.909      7.906  -8.210 2.25e-16 ***
## siteousAvanto -148.806      6.449 -23.073 < 2e-16 ***
## siteousPrisma -67.938     10.927  -6.217 5.10e-10 ***
## siteousSkyra  -155.865      6.030 -25.848 < 2e-16 ***
## siteUB        -114.489     18.443  -6.208 5.41e-10 ***
## siteUCAM      -83.145      6.849 -12.140 < 2e-16 ***
## siteUKB       -57.239      6.293  -9.095 < 2e-16 ***
## siteUmU       -77.175      8.857  -8.713 < 2e-16 ***
## siteUOXF      -44.297      7.477  -5.925 3.15e-09 ***
## icv           20.546       0.637  32.257 < 2e-16 ***
## ---
## Signif. codes:  0 '***' 0.001 '**' 0.01 '*' 0.05 '.' 0.1 ' ' 1
##
## Approximate significance of smooth terms:
##           edf Ref.df    F p-value
## t2(age_z,sleep_z) 9.226  9.226 27.07 <2e-16 ***
## ---
## Signif. codes:  0 '***' 0.001 '**' 0.01 '*' 0.05 '.' 0.1 ' ' 1
##
## R-sq.(adj) =  0.146
## lmer.REML = 6.2188e+05  Scale est. = 1202.1    n = 51278
```

## Model comparison

`mod_no_sleep` refers to model without sleep term, `mod_no_interaction` refers to model with only main effect of sleep, and `mod_full` refers to model with a full interaction between age and sleep. This is a nested model comparison, and the p-value at a given line refers to comparing the model at the line to the model on the line above. Hence, significance implies that the more complicated model is supported on statistical grounds.

To be even more specific, the p-value on the second row tests whether there is an association between sleep and volume. The p-value on the third row tests whether this association depends on age.

```
## Data: NULL
## Models:
## ml$mod_no_sleep$mer: NULL
## ml$mod_no_interaction$mer: NULL
## ml$mod_full$mer: NULL
##           npar    AIC    BIC logLik deviance  Chisq Df Pr(>Chisq)
## ml$mod_no_sleep$mer      16 621932 622074 -310950    621900
## ml$mod_no_interaction$mer  18 621919 622078 -310942    621883 17.0577  2 0.0001977 ***
```

```
## ml$mod_full$mer          20 621919 622096 -310939 621879 4.3163 2 0.1155375
## ---
## Signif. codes:  0 '***' 0.001 '**' 0.01 '*' 0.05 '.' 0.1 ' ' 1
```

We chose the model based on the likelihood ratio test with 5 % significance level, which was mod\_no\_interaction.

### Lifespan brain trajectory

The trajectory shown is from the chosen model mod\_no\_interaction.

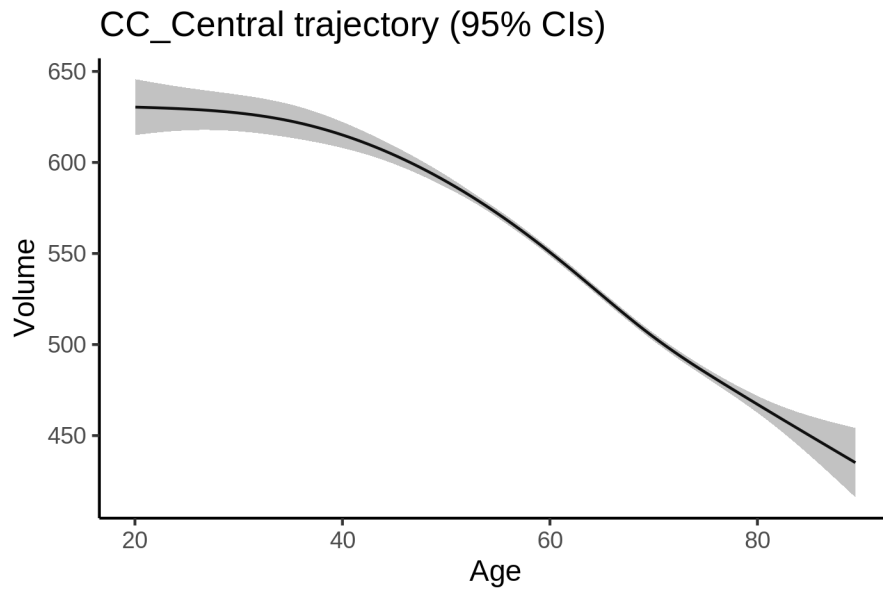

### Effect of sleep

The chosen model only included the main effect of sleep, and hence the effect does not vary with age. The black dot shows the average sleep duration across all ages in the sample.

CC\_Central sleep effect (95% CIs)

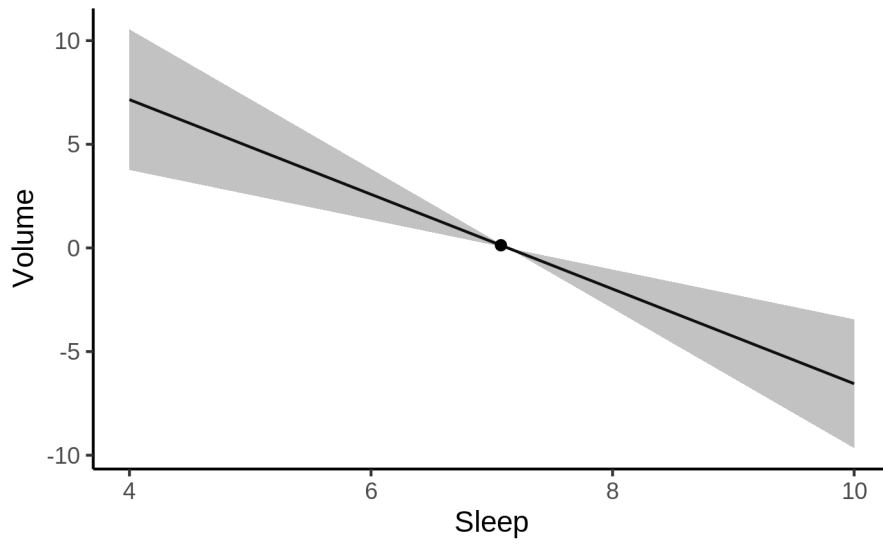

We also show the full interaction model for completeness, although it was not selected.

CC\_Central sleep effect (95% CIs)

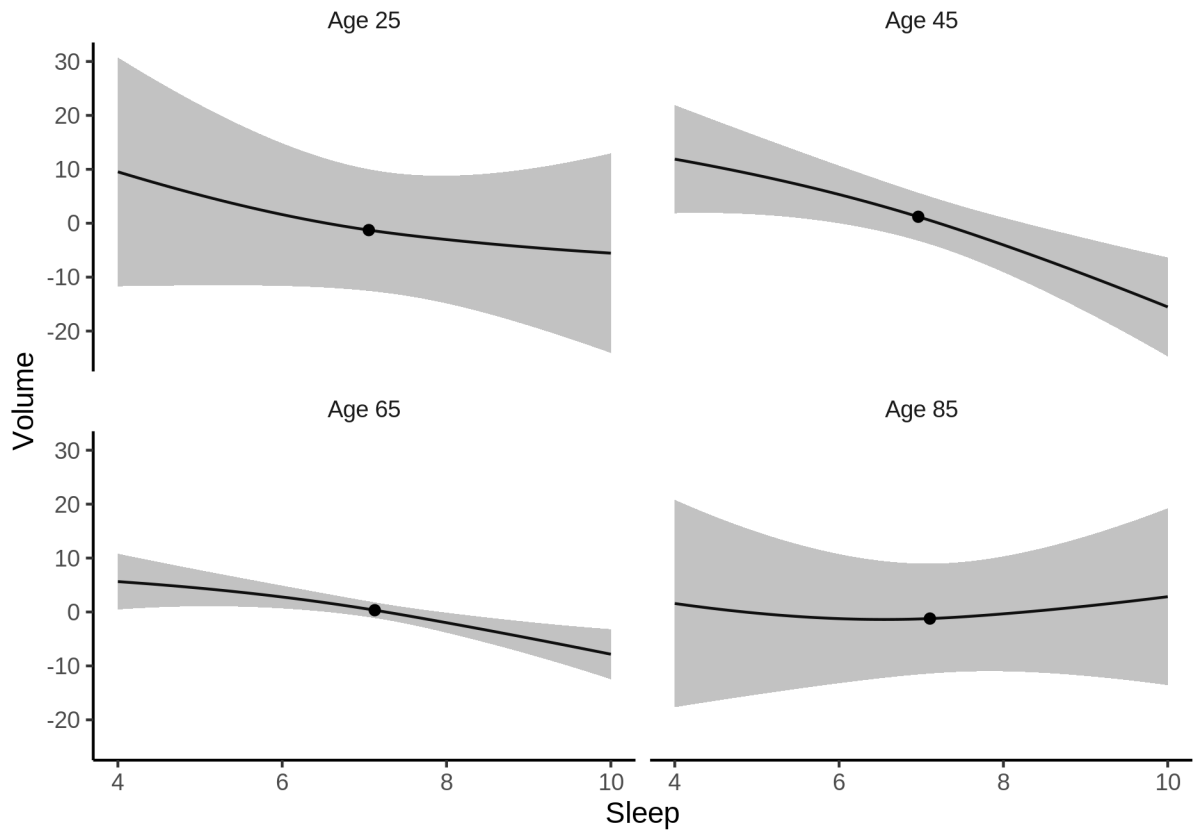

### Deviation from sleep associated with maximal volume

Model with only main effect of sleep was chosen, so we show it for all ages at once. Maximum volume is attained at 4 hours of sleep. The percentage values in the plot are calculated as follows: The maximum at 100 % refers to a person at an arbitrary age with a sleep duration associated with maximum volume. For a female, this volume is 555 and for a male it is 536. The other percentage values show how large the expected volume is for someone with other sleep durations. For example, 99 % implies a 1 % reduction.

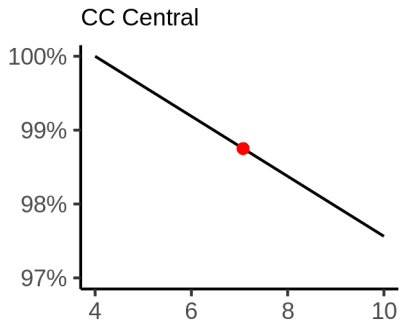

### Comparison of mean sleep and sleep associated with maximum volume

A 95 % confidence interval for the sleep associated with maximum volume is [4, 4].

The plot below compares average sleep to the sleep associated with maximum volume.

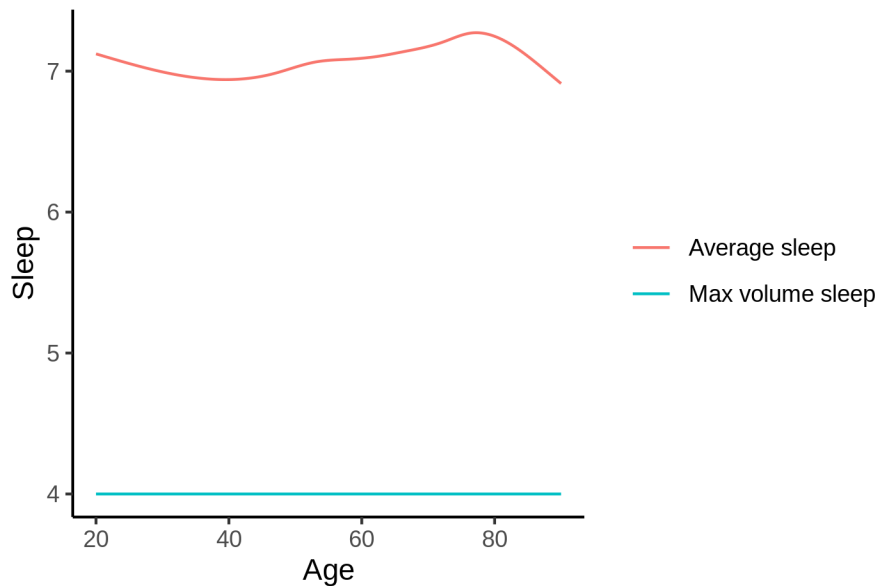

The next plot shows the difference between average sleep and sleep associated with maximum volume. The shaded region is a 95 % confidence interval.

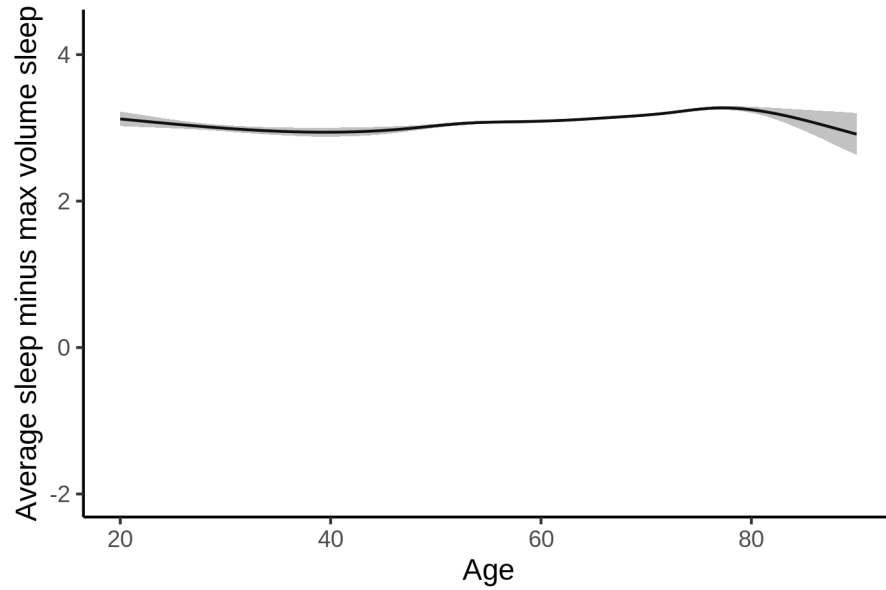

The next plot shows the probability that the sleep duration associated with maximum volume is longer than the average sleep duration, as a function of age. Probability below .05 can be interpreted as evidence that the sleep associated with maximum volume is shorter than the mean sleep, and probability above .95 can be interpreted the opposite way.

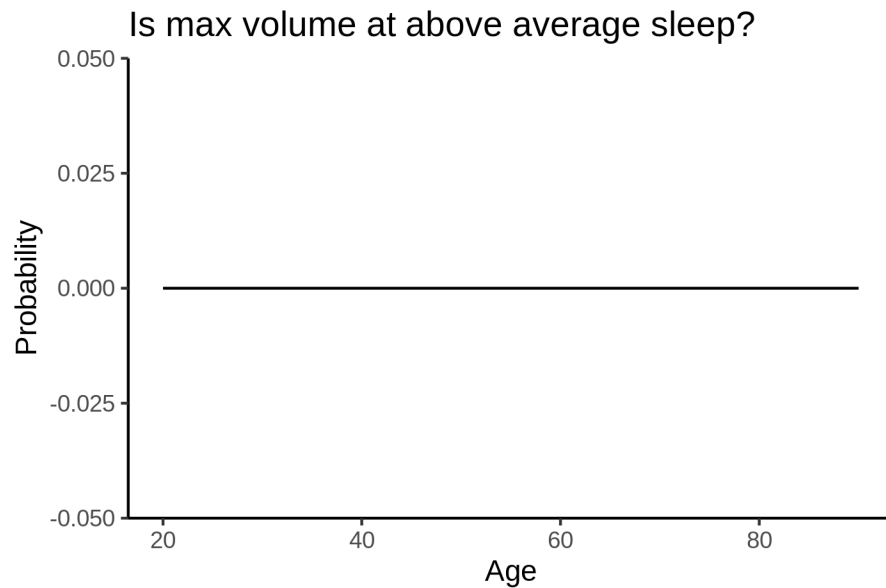

### Controlling for covariates

Below is the output for a model in which we only include data with income and education.

```
##
## Family: gaussian
## Link function: identity
##
## Formula:
```

```

## value ~ sex + site + s(age_z, k = 10, bs = "cr") + s(sleep_z,
##     k = 5, bs = "cr") + icv
## <environment: 0x558ad81d0018>
##
## Parametric coefficients:
##           Estimate Std. Error t value Pr(>|t|)
## (Intercept)  516.2388    14.4730  35.669 < 2e-16 ***
## sexmale      -18.7158     1.6012 -11.689 < 2e-16 ***
## siteousAvanto -88.3558    17.9518  -4.922 8.62e-07 ***
## siteousPrisma  12.4867    17.9160   0.697  0.486
## siteousSkyra  -89.0267    15.7033  -5.669 1.45e-08 ***
## siteUKB       14.0811    14.4453   0.975  0.330
## siteUOXF      22.1866    16.2830   1.363  0.173
## icv           21.1410     0.8227  25.697 < 2e-16 ***
## ---
## Signif. codes:  0 '***' 0.001 '**' 0.01 '*' 0.05 '.' 0.1 ' ' 1
##
## Approximate significance of smooth terms:
##           edf Ref.df      F p-value
## s(age_z)   4.899  4.899 548.764 <2e-16 ***
## s(sleep_z) 1.000  1.000  5.131  0.0235 *
## ---
## Signif. codes:  0 '***' 0.001 '**' 0.01 '*' 0.05 '.' 0.1 ' ' 1
##
## R-sq.(adj) =  0.114
## lmer.REML = 3.7828e+05  Scale est. = 1410.2    n = 31193

```

Below is the output for a model in which we control for the main effects of income and education.

```

##
## Family: gaussian
## Link function: identity
##
## Formula:
## value ~ sex + site + s(age_z, k = 10, bs = "cr") + s(sleep_z,
##     k = 5, bs = "cr") + icv + income_scaled + education_scaled
## <environment: 0x558ad81d0018>
##
## Parametric coefficients:
##           Estimate Std. Error t value Pr(>|t|)
## (Intercept)  521.4263    14.5683  35.792 < 2e-16 ***
## sexmale      -18.7668     1.6057 -11.688 < 2e-16 ***
## siteousAvanto -88.0801    17.9557  -4.905 9.37e-07 ***
## siteousPrisma  13.1710    17.9162   0.735  0.4623
## siteousSkyra  -88.7254    15.7063  -5.649 1.63e-08 ***
## siteUKB       14.1600    14.4559   0.980  0.3273
## siteUOXF      20.5483    16.2934   1.261  0.2073
## icv           21.4757     0.8299  25.876 < 2e-16 ***
## income_scaled -2.8554     1.9058  -1.498  0.1341
## education_scaled -4.9985     2.2525  -2.219  0.0265 *
## ---
## Signif. codes:  0 '***' 0.001 '**' 0.01 '*' 0.05 '.' 0.1 ' ' 1
##
## Approximate significance of smooth terms:
##           edf Ref.df      F p-value

```

```

## s(age_z) 4.965 4.965 507.278 <2e-16 ***
## s(sleep_z) 1.075 1.075 4.386 0.0298 *
## ---
## Signif. codes: 0 '***' 0.001 '**' 0.01 '*' 0.05 '.' 0.1 ' ' 1
##
## R-sq.(adj) = 0.115
## lmer.REML = 3.7826e+05 Scale est. = 1409.9 n = 31193

```

We also included interaction effects between sleep duration and education and income, in another model. The output is shown below, and the interaction terms are `income_scaled:sleep_z` and `education_scaled:sleep_z`.

```

##
## Family: gaussian
## Link function: identity
##
## Formula:
## value ~ sex + site + s(age_z, k = 10, bs = "cr") + s(sleep_z,
## k = 5, bs = "cr") + icv + income_scaled + education_scaled +
## income_scaled:sleep_z + education_scaled:sleep_z
## <environment: 0x558ad81d0018>
##
## Parametric coefficients:
## Estimate Std. Error t value Pr(>|t|)
## (Intercept) 521.303 14.569 35.782 < 2e-16 ***
## sexmale -18.651 1.607 -11.607 < 2e-16 ***
## siteousAvanto -87.833 17.956 -4.892 1.00e-06 ***
## siteousPrisma 13.723 17.918 0.766 0.4438
## siteousSkyra -88.486 15.706 -5.634 1.78e-08 ***
## siteUKB 14.311 14.457 0.990 0.3222
## siteUOXF 20.741 16.298 1.273 0.2032
## icv 21.456 0.830 25.851 < 2e-16 ***
## income_scaled -2.974 1.907 -1.560 0.1189
## education_scaled -4.922 2.253 -2.185 0.0289 *
## income_scaled:sleep_z 2.915 1.886 1.545 0.1223
## education_scaled:sleep_z -3.701 2.181 -1.697 0.0897 .
## ---
## Signif. codes: 0 '***' 0.001 '**' 0.01 '*' 0.05 '.' 0.1 ' ' 1
##
## Approximate significance of smooth terms:
## edf Ref.df F p-value
## s(age_z) 4.976 4.976 506.826 <2e-16 ***
## s(sleep_z) 1.000 1.000 0.001 0.977
## ---
## Signif. codes: 0 '***' 0.001 '**' 0.01 '*' 0.05 '.' 0.1 ' ' 1
##
## R-sq.(adj) = 0.115
## lmer.REML = 3.7825e+05 Scale est. = 1409.8 n = 31193

```

We did the same controlling for BMI. Below is the model with no covariates but only keeping data with BMI.

```

##
## Family: gaussian
## Link function: identity
##
## Formula:

```



```

## value ~ sex + site + s(age_z, k = 10, bs = "cr") + s(sleep_z,
##   k = 5, bs = "cr") + icv
## <environment: 0x558a45f6e9a0>
##
## Parametric coefficients:
##           Estimate Std. Error t value Pr(>|t|)
## (Intercept)  429.8584    10.8786  39.514 < 2e-16 ***
## sexmale      -18.2469     1.5547 -11.737 < 2e-16 ***
## siteousPrisma  91.7384    14.1515   6.483 9.14e-11 ***
## siteousSkyra   0.4134     9.0635   0.046  0.964
## siteUCAM       77.0922    11.3823   6.773 1.28e-11 ***
## siteUKB       101.2798    10.9536   9.246 < 2e-16 ***
## siteUmU       84.1167    12.6626   6.643 3.12e-11 ***
## icv           20.9390     0.8013  26.130 < 2e-16 ***
## ---
## Signif. codes:  0 '***' 0.001 '**' 0.01 '*' 0.05 '.' 0.1 ' ' 1
##
## Approximate significance of smooth terms:
##           edf Ref.df      F p-value
## s(age_z)   5.412  5.412 557.193 <2e-16 ***
## s(sleep_z) 1.000  1.000   5.654  0.0174 *
## ---
## Signif. codes:  0 '***' 0.001 '**' 0.01 '*' 0.05 '.' 0.1 ' ' 1
##
## R-sq.(adj) =  0.119
## lmer.REML = 4.0505e+05  Scale est. = 1345.4    n = 33437

```

Below is the model output with main effect.

```

##
## Family: gaussian
## Link function: identity
##
## Formula:
## value ~ sex + site + s(age_z, k = 10, bs = "cr") + s(sleep_z,
##   k = 5, bs = "cr") + icv + bmi
## <environment: 0x558a45f6e9a0>
##
## Parametric coefficients:
##           Estimate Std. Error t value Pr(>|t|)
## (Intercept)  461.3772    11.5205  40.048 < 2e-16 ***
## sexmale      -17.2469     1.5577 -11.072 < 2e-16 ***
## siteousPrisma  93.0875    14.1432   6.582 4.72e-11 ***
## siteousSkyra   0.6295     9.0619   0.069  0.945
## siteUCAM       77.9095    11.3767   6.848 7.61e-12 ***
## siteUKB       102.2671    10.9497   9.340 < 2e-16 ***
## siteUmU       85.5083    12.6559   6.756 1.44e-11 ***
## icv           21.1154     0.8008  26.369 < 2e-16 ***
## bmi           -1.2506     0.1511  -8.279 < 2e-16 ***
## ---
## Signif. codes:  0 '***' 0.001 '**' 0.01 '*' 0.05 '.' 0.1 ' ' 1
##
## Approximate significance of smooth terms:
##           edf Ref.df      F p-value
## s(age_z)   5.442  5.442 555.33 < 2e-16 ***

```

```

## s(sleep_z) 1.000 1.000 7.56 0.00597 **
## ---
## Signif. codes: 0 '***' 0.001 '**' 0.01 '*' 0.05 '.' 0.1 ' ' 1
##
## R-sq.(adj) = 0.121
## lmer.REML = 4.0498e+05 Scale est. = 1345.1 n = 33437

```

Next is the model with BMI-sleep interaction.

```

##
## Family: gaussian
## Link function: identity
##
## Formula:
## value ~ sex + site + s(age_z, k = 10, bs = "cr") + s(sleep_z,
##     k = 5, bs = "cr") + icv + bmi + bmi:sleep_z
## <environment: 0x558a45f6e9a0>
##
## Parametric coefficients:
##           Estimate Std. Error t value Pr(>|t|)
## (Intercept) 461.1069   11.5255  40.008 < 2e-16 ***
## sexmale     -17.2422    1.5577 -11.069 < 2e-16 ***
## siteousPrisma 93.0947   14.1432   6.582 4.70e-11 ***
## siteousSkyra  0.6619    9.0619   0.073  0.942
## siteUCAM     78.0172   11.3775   6.857 7.15e-12 ***
## siteUKB     102.3724   10.9506   9.349 < 2e-16 ***
## siteUmU     85.6067   12.6565   6.764 1.37e-11 ***
## icv         21.1199    0.8008  26.374 < 2e-16 ***
## bmi        -1.2465    0.1511  -8.247 < 2e-16 ***
## bmi:sleep_z  0.1154    0.1430   0.806  0.420
## ---
## Signif. codes: 0 '***' 0.001 '**' 0.01 '*' 0.05 '.' 0.1 ' ' 1
##
## Approximate significance of smooth terms:
##           edf Ref.df      F p-value
## s(age_z)   5.443  5.443 555.329 <2e-16 ***
## s(sleep_z) 1.000  1.000  1.572  0.21
## ---
## Signif. codes: 0 '***' 0.001 '**' 0.01 '*' 0.05 '.' 0.1 ' ' 1
##
## R-sq.(adj) = 0.121
## lmer.REML = 4.0499e+05 Scale est. = 1345.1 n = 33437

```

We did the same controlling for depression. Below is the model with no covariates but only keeping data with depression.

```

##
## Family: gaussian
## Link function: identity
##
## Formula:
## value ~ sex + site + s(age_z, k = 10, bs = "cr") + s(sleep_z,
##     k = 5, bs = "cr") + icv
## <environment: 0x558a48036f40>
##
## Parametric coefficients:

```

```

##           Estimate Std. Error t value Pr(>|t|)
## (Intercept)  517.8638     7.3368  70.584 < 2e-16 ***
## sexmale      -18.0327     1.5588 -11.568 < 2e-16 ***
## siteousAvanto -91.4470    17.0927  -5.350 8.85e-08 ***
## siteousPrisma  -1.0022    14.2674  -0.070  0.9440
## siteousSkyra  -97.4031    11.0807  -8.790 < 2e-16 ***
## siteUCAM      -18.0590    10.0338  -1.800  0.0719 .
## siteUKB        12.5073     7.2535   1.724  0.0847 .
## siteUmU        -6.0696     9.8959  -0.613  0.5397
## icv            20.5088     0.8023  25.563 < 2e-16 ***
## ---
## Signif. codes:  0 '***' 0.001 '**' 0.01 '*' 0.05 '.' 0.1 ' ' 1
##
## Approximate significance of smooth terms:
##           edf Ref.df      F p-value
## s(age_z)    5.28  5.28 548.477 <2e-16 ***
## s(sleep_z)  1.00  1.00   5.371  0.0205 *
## ---
## Signif. codes:  0 '***' 0.001 '**' 0.01 '*' 0.05 '.' 0.1 ' ' 1
##
## R-sq.(adj) =  0.117
## lmer.REML = 4.0368e+05  Scale est. = 1319      n = 33349

```

Below is the model output with main effect.

```

##
## Family: gaussian
## Link function: identity
##
## Formula:
## value ~ sex + site + s(age_z, k = 10, bs = "cr") + s(sleep_z,
##           k = 5, bs = "cr") + icv + depression
## <environment: 0x558a48036f40>
##
## Parametric coefficients:
##           Estimate Std. Error t value Pr(>|t|)
## (Intercept)  519.1124     7.3698  70.438 < 2e-16 ***
## sexmale      -18.1551     1.5603 -11.636 < 2e-16 ***
## siteousAvanto -90.8188    17.0971  -5.312 1.09e-07 ***
## siteousPrisma  -0.4505    14.2721  -0.032  0.9748
## siteousSkyra  -96.6939    11.0893  -8.720 < 2e-16 ***
## siteUCAM      -17.7827    10.0355  -1.772  0.0764 .
## siteUKB        11.9659     7.2596   1.648  0.0993 .
## siteUmU        -2.4288    10.1042  -0.240  0.8100
## icv            20.5194     0.8023  25.576 < 2e-16 ***
## depression    -9.8610     5.5272  -1.784  0.0744 .
## ---
## Signif. codes:  0 '***' 0.001 '**' 0.01 '*' 0.05 '.' 0.1 ' ' 1
##
## Approximate significance of smooth terms:
##           edf Ref.df      F p-value
## s(age_z)    5.307  5.307 540.209 <2e-16 ***
## s(sleep_z)  1.000  1.000   5.941  0.0148 *
## ---
## Signif. codes:  0 '***' 0.001 '**' 0.01 '*' 0.05 '.' 0.1 ' ' 1

```

```
##
## R-sq.(adj) = 0.117
## lmer.REML = 4.0367e+05 Scale est. = 1318.9 n = 33349
```

Next is the model with depression-sleep interaction.

```
##
## Family: gaussian
## Link function: identity
##
## Formula:
## value ~ sex + site + s(age_z, k = 10, bs = "cr") + s(sleep_z,
## k = 5, bs = "cr") + icv + depression + depression:sleep_z
## <environment: 0x558a48036f40>
##
## Parametric coefficients:
## Estimate Std. Error t value Pr(>|t|)
## (Intercept) 519.10625 7.36948 70.440 < 2e-16 ***
## sexmale -18.20764 1.56044 -11.668 < 2e-16 ***
## siteousAvanto -91.24448 17.09763 -5.337 9.53e-08 ***
## siteousPrisma -0.86233 14.27220 -0.060 0.9518
## siteousSkyra -97.10237 11.08979 -8.756 < 2e-16 ***
## siteUCAM -18.17753 10.03688 -1.811 0.0701 .
## siteUKB 11.99039 7.25925 1.652 0.0986 .
## siteUmU 0.03934 10.18674 0.004 0.9969
## icv 20.52535 0.80225 25.585 < 2e-16 ***
## depression -10.44598 5.53554 -1.887 0.0592 .
## depression:sleep_z -7.67600 4.03881 -1.901 0.0574 .
## ---
## Signif. codes: 0 '***' 0.001 '**' 0.01 '*' 0.05 '.' 0.1 ' ' 1
##
## Approximate significance of smooth terms:
## edf Ref.df F p-value
## s(age_z) 5.296 5.296 541.702 <2e-16 ***
## s(sleep_z) 1.000 1.000 1.081 0.299
## ---
## Signif. codes: 0 '***' 0.001 '**' 0.01 '*' 0.05 '.' 0.1 ' ' 1
##
## R-sq.(adj) = 0.117
## lmer.REML = 4.0366e+05 Scale est. = 1319 n = 33349
```

The plot below shows the sleep-volume curve for the original model and for the model with main effects of SES.

CC\_Central sleep effect, covariates

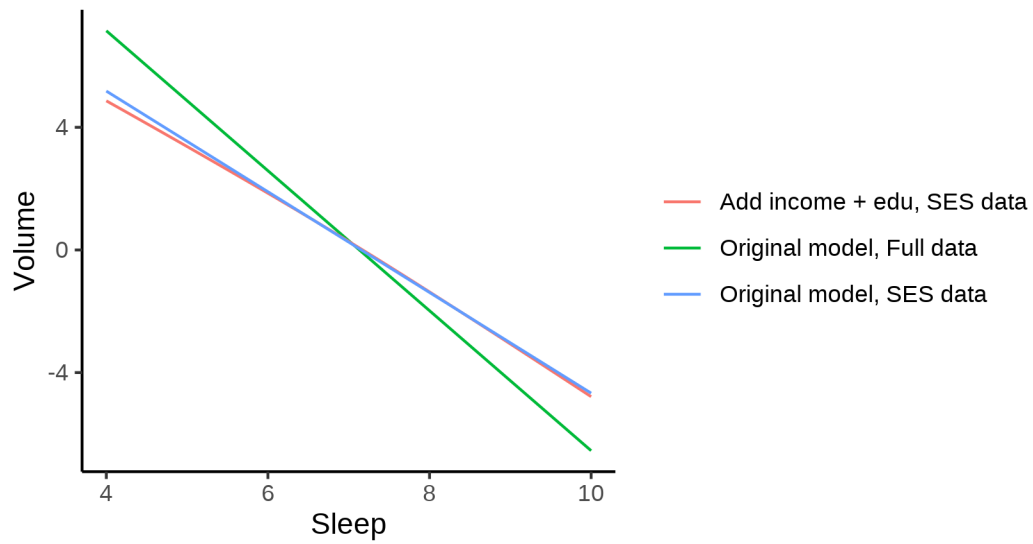

The plot below shows the sleep-volume curve for the original model and for the model with main effects of BMI.

CC\_Central sleep effect, covariates

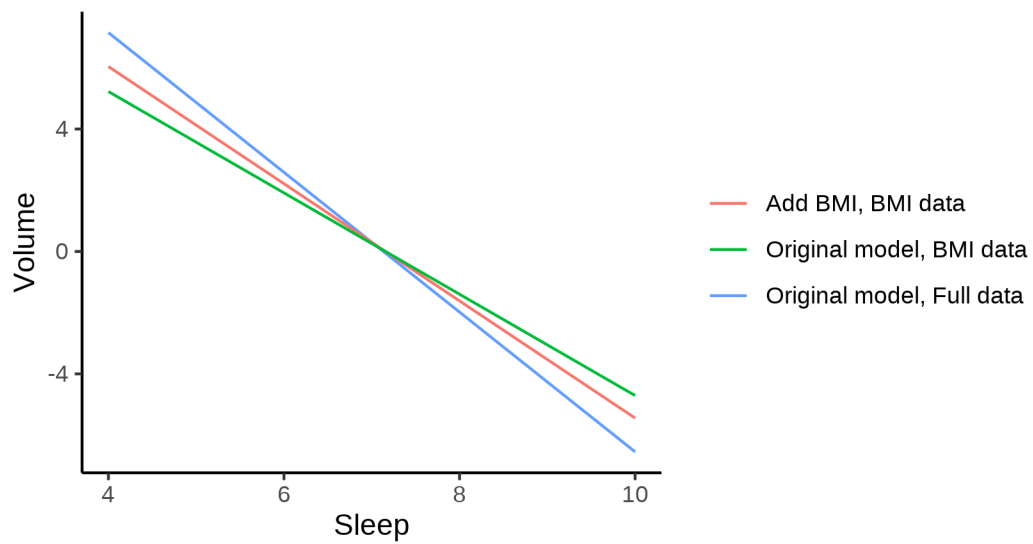

The plot below shows the sleep-volume curve for the original model and for the model with main effects of depression.

## CC\_Central sleep effect, covariates

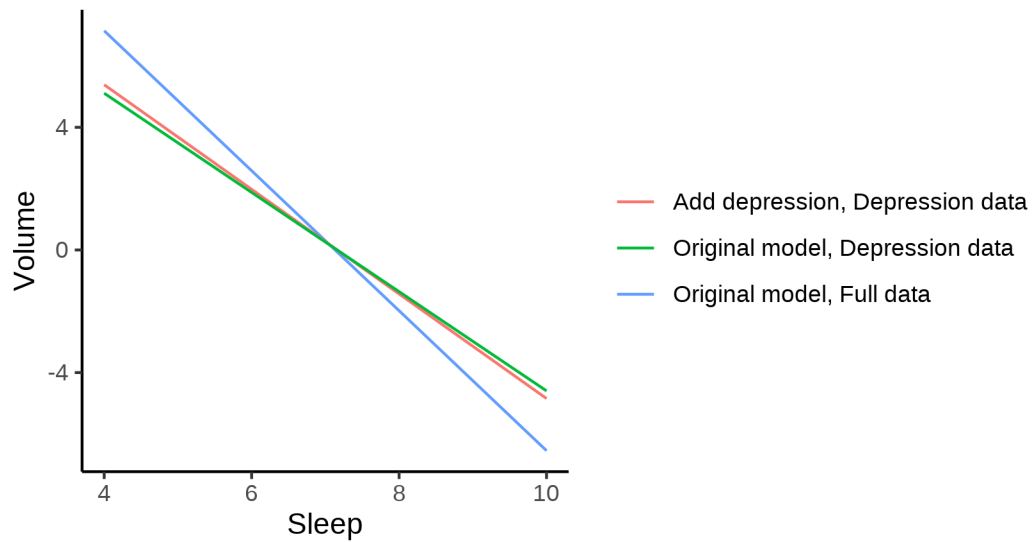

## Models Not controlling for ICV

### Model outputs

Model without sleep term

```
##
## Family: gaussian
## Link function: identity
##
## Formula:
## value ~ sex + site + s(age_z, k = 10, bs = "cr")
## <environment: 0x55895ab3e980>
##
## Parametric coefficients:
##              Estimate Std. Error t value Pr(>|t|)
## (Intercept)   579.107     6.174  93.796 < 2e-16 ***
## sexmale        4.407       1.050   4.197 2.71e-05 ***
## siteMPIB     -98.715       7.884 -12.520 < 2e-16 ***
## siteousAvanto -139.881     6.476 -21.601 < 2e-16 ***
## siteousPrisma -63.834     11.015  -5.795 6.87e-09 ***
## siteousSkyra  -154.597     6.057 -25.522 < 2e-16 ***
## siteUB       -120.631    18.635  -6.473 9.67e-11 ***
## siteUCAM     -82.423     6.888 -11.967 < 2e-16 ***
## siteUKB     -57.095     6.341  -9.004 < 2e-16 ***
## siteUmU     -87.045     8.906  -9.774 < 2e-16 ***
## siteUOXF    -49.369     7.536  -6.551 5.76e-11 ***
## ---
## Signif. codes:  0 '***' 0.001 '**' 0.01 '*' 0.05 '.' 0.1 ' ' 1
##
## Approximate significance of smooth terms:
##              edf Ref.df    F p-value
## s(age_z)    5.732  5.732 849.7 <2e-16 ***
```

```
## ---
## Signif. codes:  0 '***' 0.001 '**' 0.01 '*' 0.05 '.' 0.1 ' ' 1
##
## R-sq.(adj) =  0.128
## lmer.REML = 6.2292e+05  Scale est. = 1216.3    n = 51278
```

Model with only main effects of age and sleep

```
##
## Family: gaussian
## Link function: identity
##
## Formula:
## value ~ sex + site + s(age_z, k = 10, bs = "cr") + s(sleep_z,
##       k = 5, bs = "cr")
## <environment: 0x55895ab3e980>
##
## Parametric coefficients:
##           Estimate Std. Error t value Pr(>|t|)
## (Intercept)   578.362     6.178  93.611 < 2e-16 ***
## sexmale         4.398     1.050   4.188 2.82e-05 ***
## siteMPIB       -97.800     7.887 -12.400 < 2e-16 ***
## siteousAvanto -139.544     6.477 -21.546 < 2e-16 ***
## siteousPrisma -63.615    11.014  -5.776 7.71e-09 ***
## siteousSkyra  -154.279     6.058 -25.465 < 2e-16 ***
## siteUB         -120.217    18.632  -6.452 1.11e-10 ***
## siteUCAM       -81.956     6.887 -11.900 < 2e-16 ***
## siteUKB        -56.313     6.345  -8.875 < 2e-16 ***
## siteUmU        -85.087     8.924  -9.534 < 2e-16 ***
## siteUOXF       -49.001     7.534  -6.504 7.90e-11 ***
```

```
## ---
## Signif. codes:  0 '***' 0.001 '**' 0.01 '*' 0.05 '.' 0.1 ' ' 1
##
## Approximate significance of smooth terms:
##           edf Ref.df      F p-value
## s(age_z)   5.710  5.710 843.24 < 2e-16 ***
## s(sleep_z) 1.938  1.938   7.66 0.00236 **
```

```
## ---
## Signif. codes:  0 '***' 0.001 '**' 0.01 '*' 0.05 '.' 0.1 ' ' 1
##
## R-sq.(adj) =  0.129
## lmer.REML = 6.2291e+05  Scale est. = 1216.4    n = 51278
```

Model with full interaction between age and sleep

```
##
## Family: gaussian
## Link function: identity
##
## Formula:
## value ~ sex + site + t2(age_z, sleep_z, k = c(10, 4), bs = "cr")
## <environment: 0x55895ab3e980>
##
## Parametric coefficients:
##           Estimate Std. Error t value Pr(>|t|)
## (Intercept)   578.548     6.214  93.101 < 2e-16 ***
```

```

## sexmale          4.252      1.052   4.041 5.34e-05 ***
## siteMPIB        -97.966      7.932 -12.351 < 2e-16 ***
## siteousAvanto  -139.768      6.514 -21.458 < 2e-16 ***
## siteousPrisma  -63.901     11.037  -5.790 7.09e-09 ***
## siteousSkyra  -154.350      6.100 -25.302 < 2e-16 ***
## siteUB         -120.238     18.647  -6.448 1.14e-10 ***
## siteUCAM       -81.943      6.930 -11.824 < 2e-16 ***
## siteUKB        -56.437      6.381  -8.844 < 2e-16 ***
## siteUmU        -85.690      8.958  -9.566 < 2e-16 ***
## siteUOXF       -48.793      7.572  -6.444 1.17e-10 ***
## ---
## Signif. codes:  0 '***' 0.001 '**' 0.01 '*' 0.05 '.' 0.1 ' ' 1
##
## Approximate significance of smooth terms:
##                edf Ref.df    F p-value
## t2(age_z,sleep_z) 9.787  9.787 23.04 <2e-16 ***
## ---
## Signif. codes:  0 '***' 0.001 '**' 0.01 '*' 0.05 '.' 0.1 ' ' 1
##
## R-sq.(adj) =  0.129
## lmer.REML = 6.2291e+05  Scale est. = 1216.4    n = 51278

```

## Model comparison

`mod_no_sleep` refers to model without sleep term, `mod_no_interaction` refers to model with only main effect of sleep, and `mod_full` refers to model with a full interaction between age and sleep. This is a nested model comparison, and the p-value at a given line refers to comparing the model at the line to the model on the line above. Hence, significance implies that the more complicated model is supported on statistical grounds.

To be even more specific, the p-value on the second row tests whether there is an association between sleep and volume. The p-value on the third row tests whether this association depends on age.

```

## Data: NULL
## Models:
## ml$mod_no_sleep$mer: NULL
## ml$mod_no_interaction$mer: NULL
## ml$mod_full$mer: NULL
##
##                npar    AIC    BIC logLik deviance  Chisq Df Pr(>Chisq)
## ml$mod_no_sleep$mer      15 622952 623084 -311461  622922
## ml$mod_no_interaction$mer  17 622945 623096 -311456  622911 10.4719  2  0.005322 **
## ml$mod_full$mer          19 622946 623115 -311454  622908  2.8984  2  0.234760
## ---
## Signif. codes:  0 '***' 0.001 '**' 0.01 '*' 0.05 '.' 0.1 ' ' 1

```

We chose the model based on the likelihood ratio test with 5 % significance level, which was `mod_no_interaction`.

## Lifespan brain trajectory

The trajectory shown is from the chosen model `mod_no_interaction_no_icv`.



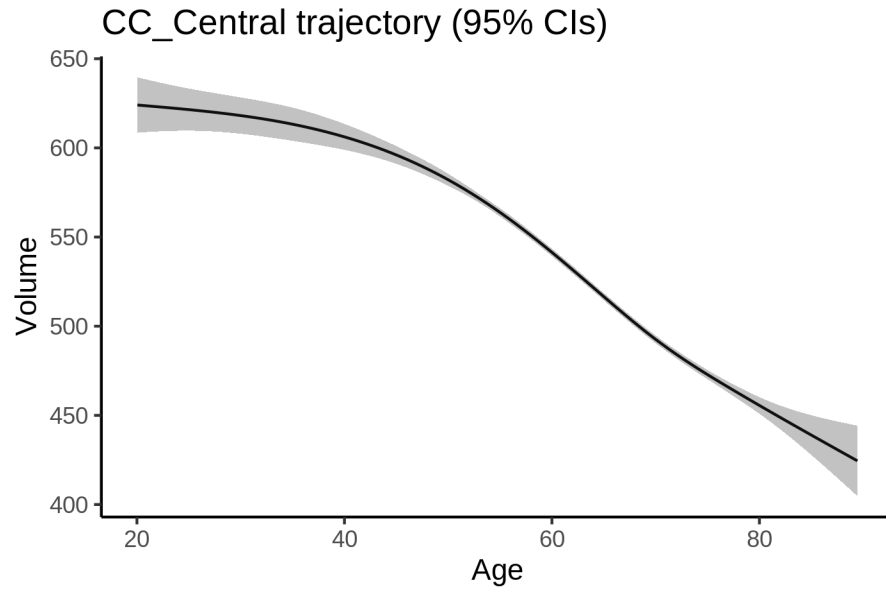

**Effect of sleep**

The chosen model only included the main effect of sleep, and hence the effect does not vary with age. The black dot shows the average sleep duration across all ages in the sample.

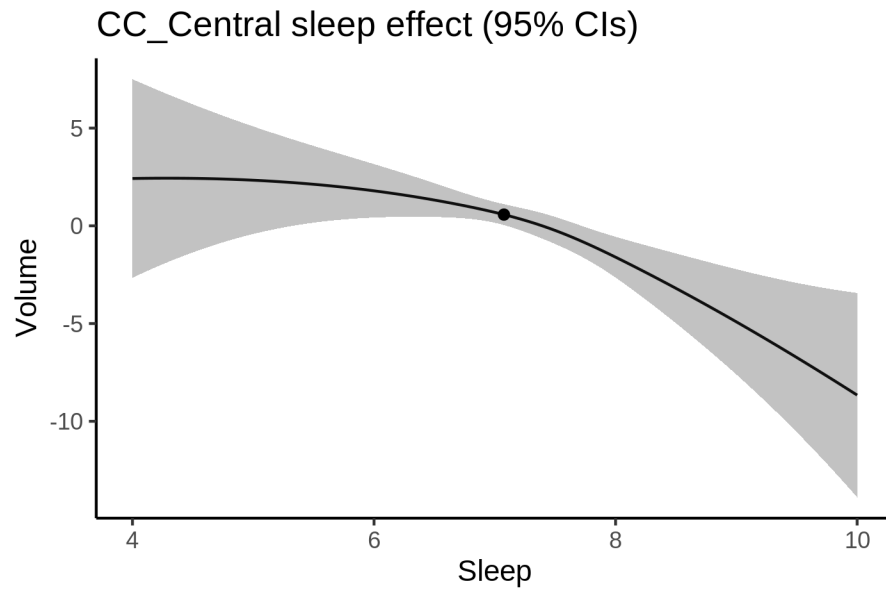

We also show the full interaction model for completeness, although it was not selected.

### CC\_Central sleep effect (95% CIs)

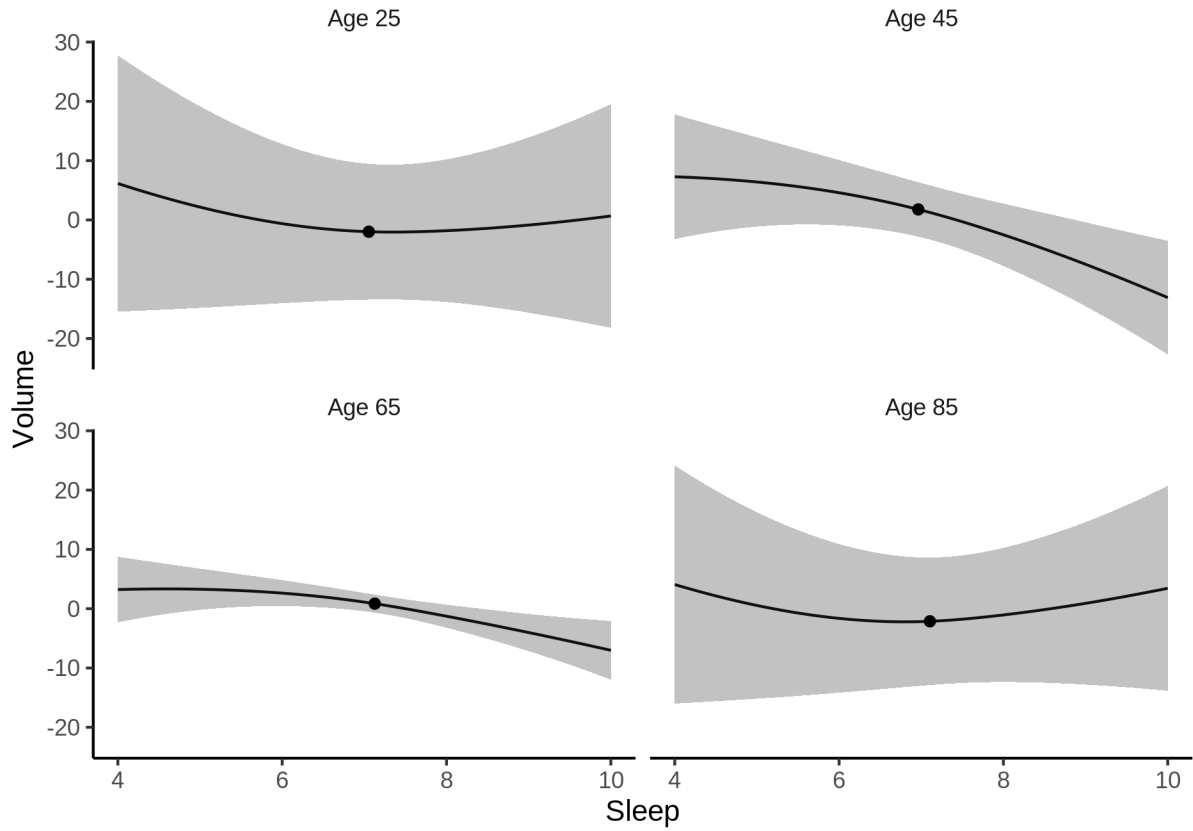

### Deviation from sleep associated with maximal volume

Model with only main effect of sleep was chosen, so we show it for all ages at once. Maximum volume is attained at 4.3 hours of sleep. The percentage values in the plot are calculated as follows: The maximum at 100 % refers to a person at an arbitrary age with a sleep duration associated with maximum volume. For a female, this volume is 546 and for a male it is 550. The other percentage values show how large the expected volume is for someone with other sleep durations. For example, 99 % implies a 1 % reduction.

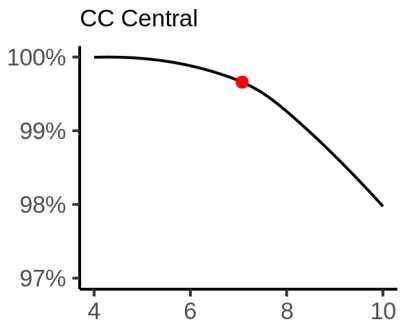

### Comparison of mean sleep and sleep associated with maximum volume

A 95 % confidence interval for the sleep associated with maximum volume is [4, 6.55].

The plot below compares average sleep to the sleep associated with maximum volume.

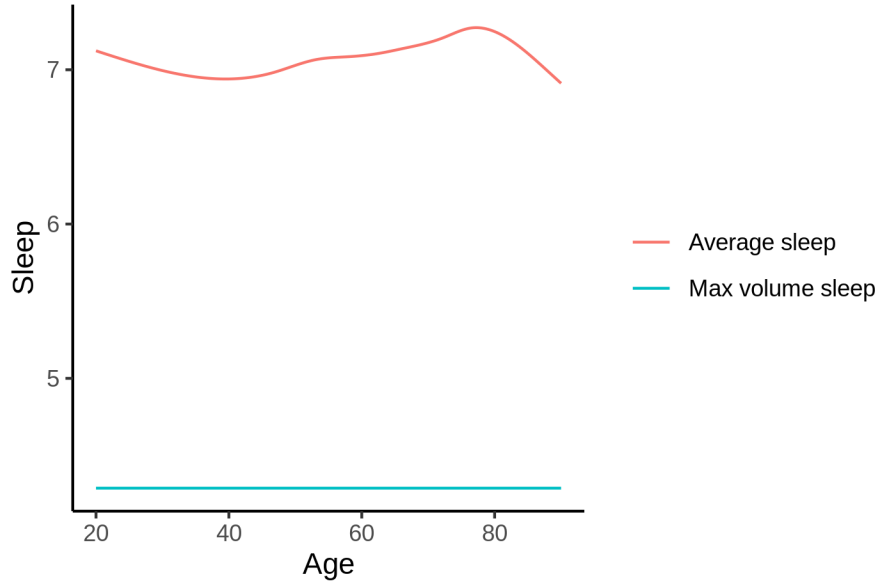

The next plot shows the difference between average sleep and sleep associated with maximum volume. The shaded region is a 95 % confidence interval.

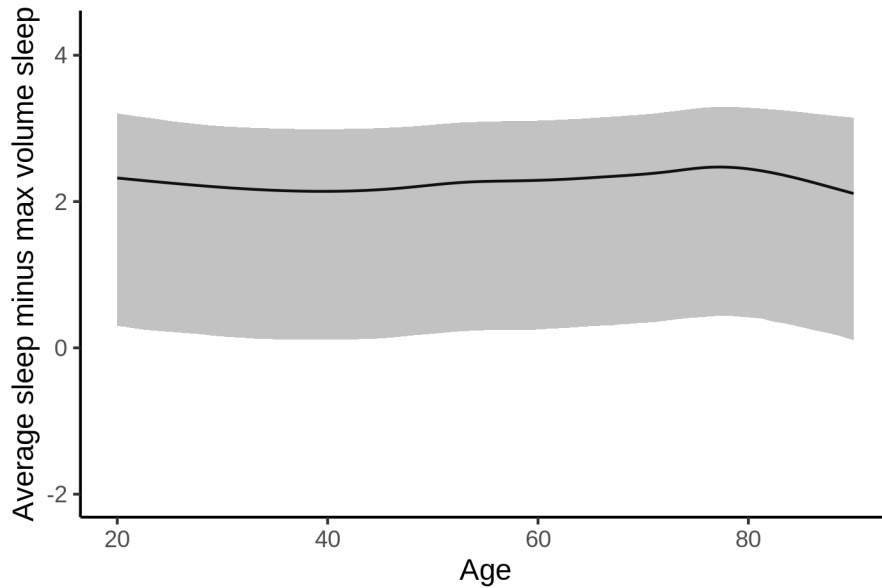

The next plot shows the probability that the sleep duration associated with maximum volume is longer than the average sleep duration, as a function of age. Probability below .05 can be interpreted as evidence that the sleep associated with maximum volume is shorter than the mean sleep, and probability above .95 can be interpreted the opposite way.

Is max volume at above average sleep?

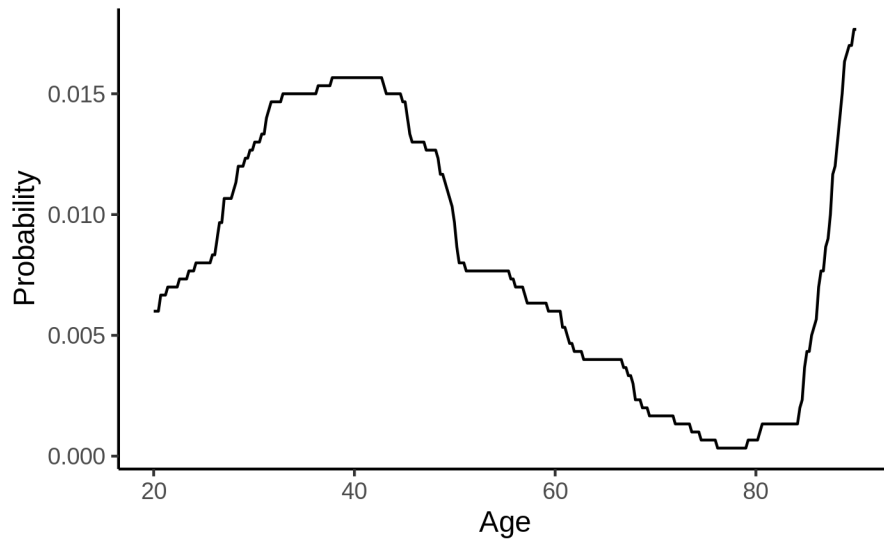

## CC\_Mid\_Anterior

### Descriptive statistics

| Study | Observations | Unique IDs | Mean age | Age range |
|-------|--------------|------------|----------|-----------|
| HCP   | 974          | 974        | 28.8     | 22 - 37   |
| MPIB  | 677          | 391        | 63.1     | 24 - 83   |
| UB    | 113          | 39         | 70.9     | 64 - 81   |
| UCAM  | 881          | 631        | 55.1     | 20 - 88   |
| UiO   | 1475         | 803        | 49.4     | 20 - 89   |
| UKB   | 45966        | 43131      | 64.5     | 45 - 83   |
| UmU   | 412          | 279        | 62.2     | 25 - 85   |
| UOXF  | 769          | 769        | 69.8     | 60 - 85   |

## Spaghetti plot

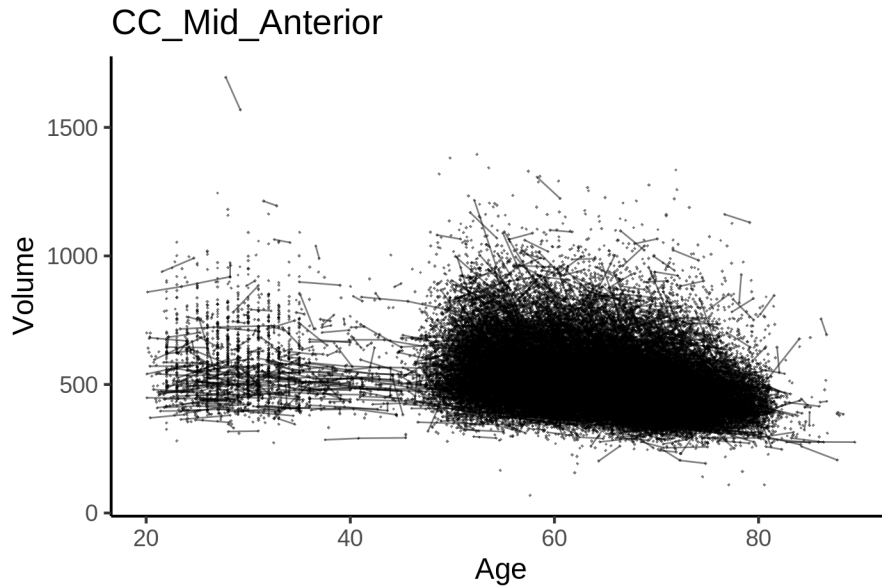

## Models Controlling for ICV

### Model outputs

Model without sleep term

```
##
## Family: gaussian
## Link function: identity
##
## Formula:
## value ~ sex + site + icv + s(age_z, k = 10, bs = "cr")
## <environment: 0x558a46b71da8>
##
## Parametric coefficients:
##              Estimate Std. Error t value Pr(>|t|)
## (Intercept)  552.4539    6.3902  86.453 < 2e-16 ***
## sexmale      -17.1079    1.3104 -13.056 < 2e-16 ***
## siteMPIB     -0.8416    8.1661  -0.103 0.91791
## siteousAvanto -104.8390    6.6735 -15.710 < 2e-16 ***
## siteousPrisma -38.5730   11.3110  -3.410 0.00065 ***
## siteousSkyra -101.7833    6.2253 -16.350 < 2e-16 ***
## siteUB       -75.3639   19.0957  -3.947 7.94e-05 ***
## siteUCAM     -53.0345    7.0829  -7.488 7.12e-14 ***
## siteUKB      -18.4993    6.5525  -2.823 0.00476 **
## siteUmU      -38.7947    9.1550  -4.238 2.26e-05 ***
## siteUOXF     -8.7402    7.7673  -1.125 0.26049
## icv          30.8475    0.6593  46.788 < 2e-16 ***
## ---
## Signif. codes:  0 '***' 0.001 '**' 0.01 '*' 0.05 '.' 0.1 ' ' 1
##
```

```

## Approximate significance of smooth terms:
##           edf Ref.df      F p-value
## s(age_z) 6.186  6.186 844.3 <2e-16 ***
## ---
## Signif. codes:  0 '***' 0.001 '**' 0.01 '*' 0.05 '.' 0.1 ' ' 1
##
## R-sq.(adj) =  0.16
## lmer.REML = 6.2541e+05  Scale est. = 1316.3    n = 51267

Model with only main effects of age and sleep

##
## Family: gaussian
## Link function: identity
##
## Formula:
## value ~ sex + site + icv + s(age_z, k = 10, bs = "cr") + s(sleep_z,
##           k = 5, bs = "cr")
## <environment: 0x558a46b71da8>
##
## Parametric coefficients:
##           Estimate Std. Error t value Pr(>|t|)
## (Intercept)  551.1118     6.3930  86.205 < 2e-16 ***
## sexmale      -17.1553     1.3101 -13.095 < 2e-16 ***
## siteMPIB      0.6217      8.1690   0.076 0.939338
## siteousAvanto -104.1294     6.6732 -15.604 < 2e-16 ***
## siteousPrisma -38.0963    11.3090  -3.369 0.000756 ***
## siteousSkyra  -101.0504     6.2251 -16.233 < 2e-16 ***
## siteUB        -74.9556    19.0902  -3.926 8.63e-05 ***
## siteUCAM      -52.3477     7.0817  -7.392 1.47e-13 ***
## siteUKB       -17.0724     6.5558  -2.604 0.009212 **
## siteUmU       -35.8133     9.1734  -3.904 9.47e-05 ***
## siteUOXF      -8.0508     7.7651  -1.037 0.299842
## icv           30.9418     0.6595  46.921 < 2e-16 ***
## ---
## Signif. codes:  0 '***' 0.001 '**' 0.01 '*' 0.05 '.' 0.1 ' ' 1
##
## Approximate significance of smooth terms:
##           edf Ref.df      F p-value
## s(age_z)   6.163  6.163 837.7 < 2e-16 ***
## s(sleep_z) 1.000  1.000  22.3 2.36e-06 ***
## ---
## Signif. codes:  0 '***' 0.001 '**' 0.01 '*' 0.05 '.' 0.1 ' ' 1
##
## R-sq.(adj) =  0.16
## lmer.REML = 6.2539e+05  Scale est. = 1316.5    n = 51267

Model with full interaction between age and sleep

##
## Family: gaussian
## Link function: identity
##
## Formula:
## value ~ sex + site + icv + t2(age_z, sleep_z, k = c(10, 4), bs = "cr")
## <environment: 0x558a46b71da8>

```

```

##
## Parametric coefficients:
##           Estimate Std. Error t value Pr(>|t|)
## (Intercept)  550.8009     6.4207  85.785 < 2e-16 ***
## sexmale      -17.3358     1.3127 -13.207 < 2e-16 ***
## siteMPIB      1.1641      8.2135  0.142 0.887294
## siteousAvanto -104.0985     6.7088 -15.517 < 2e-16 ***
## siteousPrisma -38.1260    11.3312  -3.365 0.000767 ***
## siteousSkyra -100.9104     6.2664 -16.104 < 2e-16 ***
## siteUB        -74.1469    19.1034  -3.881 0.000104 ***
## siteUCAM      -51.8033     7.1235  -7.272 3.59e-13 ***
## siteUKB       -16.6696     6.5836  -2.532 0.011344 *
## siteUmU       -35.7616     9.2044  -3.885 0.000102 ***
## siteUOXF      -7.2821     7.7960  -0.934 0.350268
## icv           30.9627     0.6595  46.947 < 2e-16 ***
## ---
## Signif. codes:  0 '***' 0.001 '**' 0.01 '*' 0.05 '.' 0.1 ' ' 1
##
## Approximate significance of smooth terms:
##           edf Ref.df      F p-value
## t2(age_z,sleep_z) 9.537  9.537 19.29 <2e-16 ***
## ---
## Signif. codes:  0 '***' 0.001 '**' 0.01 '*' 0.05 '.' 0.1 ' ' 1
##
## R-sq.(adj) =  0.16
## lmer.REML = 6.2539e+05  Scale est. = 1315.9    n = 51267

```

## Model comparison

mod\_no\_sleep refers to model without sleep term, mod\_no\_interaction refers to model with only main effect of sleep, and mod\_full refers to model with a full interaction between age and sleep. This is a nested model comparison, and the p-value at a given line refers to comparing the model at the line to the model on the line above. Hence, significance implies that the more complicated model is supported on statistical grounds.

To be even more specific, the p-value on the second row tests whether there is an association between sleep and volume. The p-value on the third row tests whether this association depends on age.

```

## Data: NULL
## Models:
## ml$mod_no_sleep$mer: NULL
## ml$mod_no_interaction$mer: NULL
## ml$mod_full$mer: NULL
##           npar      AIC      BIC logLik deviance Chisq Df Pr(>Chisq)
## ml$mod_no_sleep$mer      16 625445 625587 -312707  625413
## ml$mod_no_interaction$mer  18 625427 625586 -312695  625391 22.296  2  1.44e-05 ***
## ml$mod_full$mer          20 625432 625609 -312696  625392  0.000  2      1
## ---
## Signif. codes:  0 '***' 0.001 '**' 0.01 '*' 0.05 '.' 0.1 ' ' 1

```

We chose the model based on the likelihood ratio test with 5 % significance level, which was mod\_no\_interaction.

### Lifespan brain trajectory

The trajectory shown is from the chosen model `mod_no_interaction`.

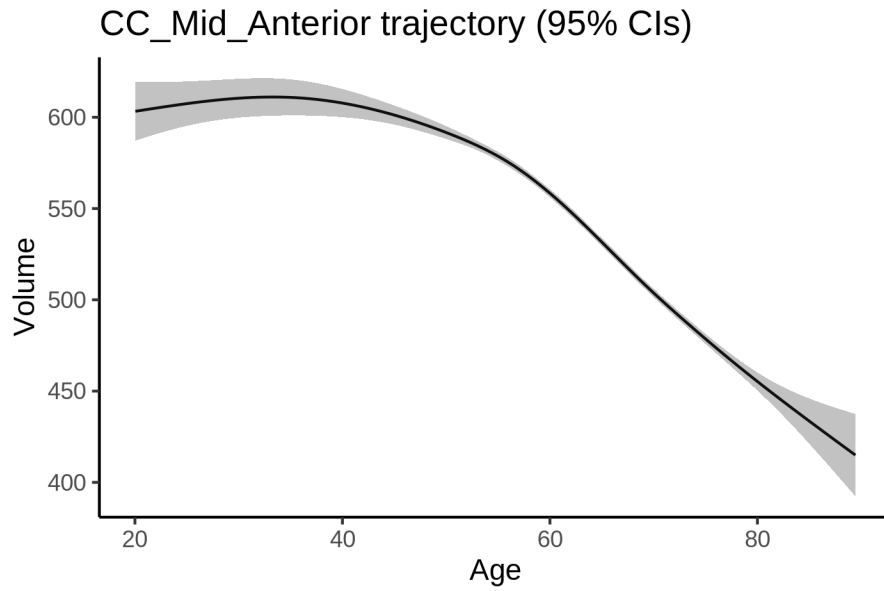

### Effect of sleep

The chosen model only included the main effect of sleep, and hence the effect does not vary with age. The black dot shows the average sleep duration across all ages in the sample.

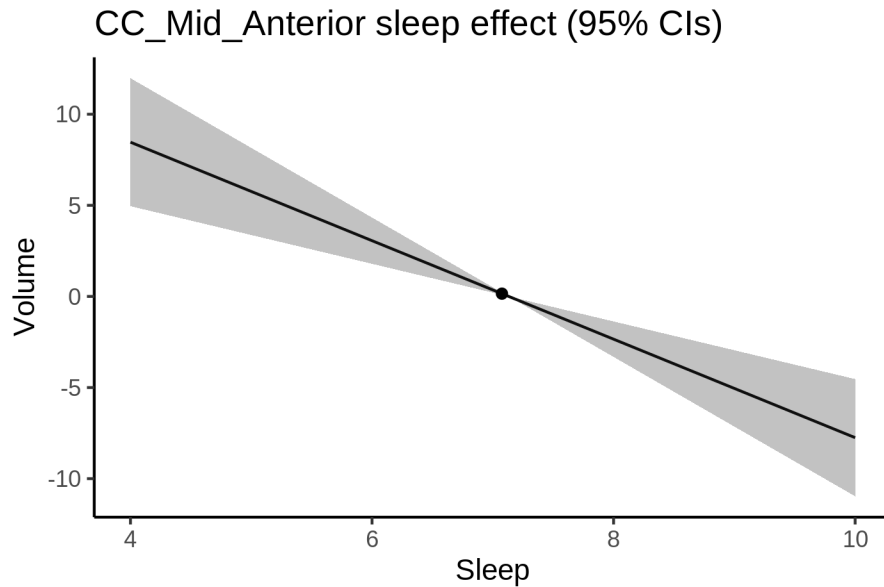

We also show the full interaction model for completeness, although it was not selected.



### CC\_Mid\_Anterior sleep effect (95% CIs)

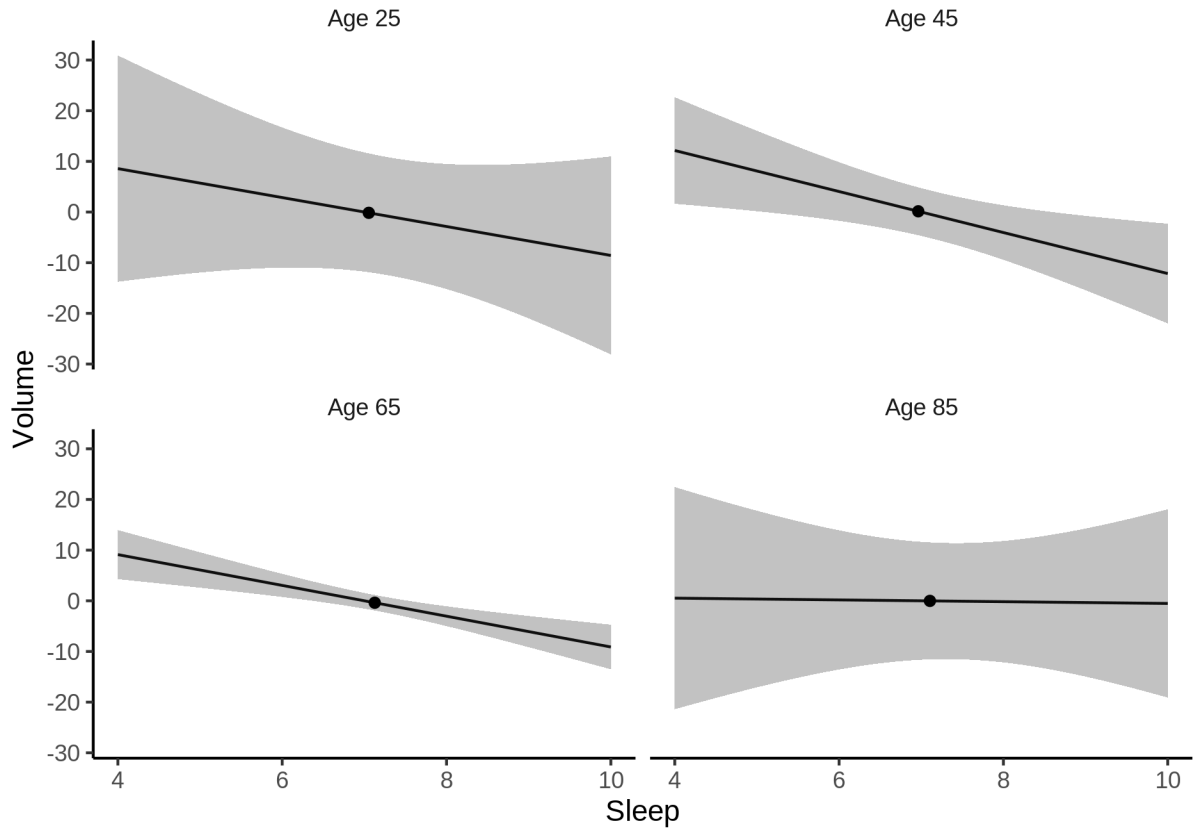

### Deviation from sleep associated with maximal volume

Model with only main effect of sleep was chosen, so we show it for all ages at once. Maximum volume is attained at 4 hours of sleep. The percentage values in the plot are calculated as follows: The maximum at 100 % refers to a person at an arbitrary age with a sleep duration associated with maximum volume. For a female, this volume is 548 and for a male it is 531. The other percentage values show how large the expected volume is for someone with other sleep durations. For example, 99 % implies a 1 % reduction.

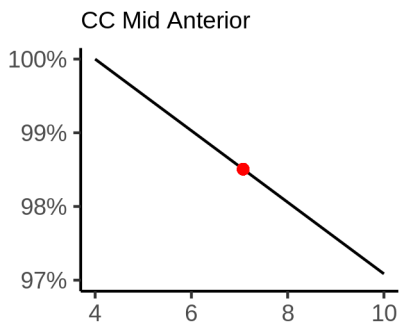

### Comparison of mean sleep and sleep associated with maximum volume

A 95 % confidence interval for the sleep associated with maximum volume is [4, 4].

The plot below compares average sleep to the sleep associated with maximum volume.



The next plot shows the difference between average sleep and sleep associated with maximum volume. The shaded region is a 95 % confidence interval.

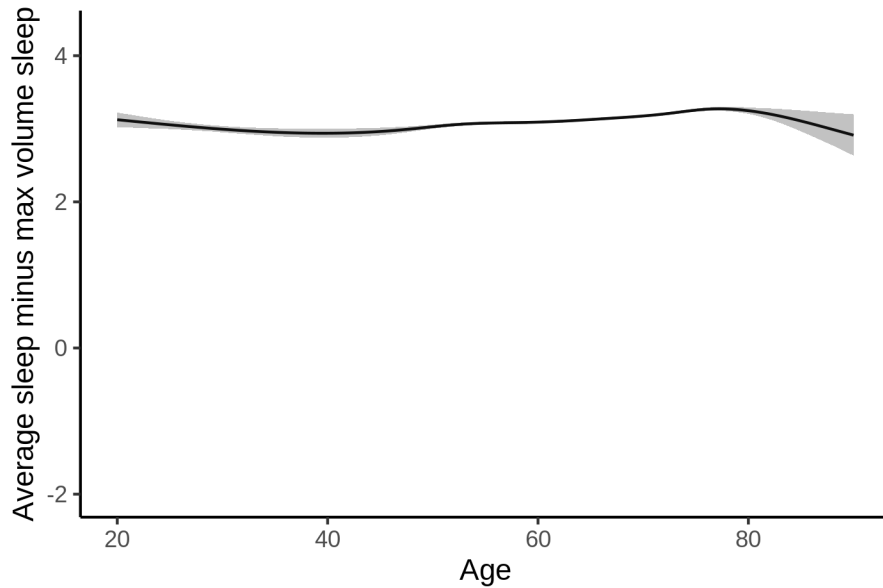

The next plot shows the probability that the sleep duration associated with maximum volume is longer than the average sleep duration, as a function of age. Probability below .05 can be interpreted as evidence that the sleep associated with maximum volume is shorter than the mean sleep, and probability above .95 can be interpreted the opposite way.

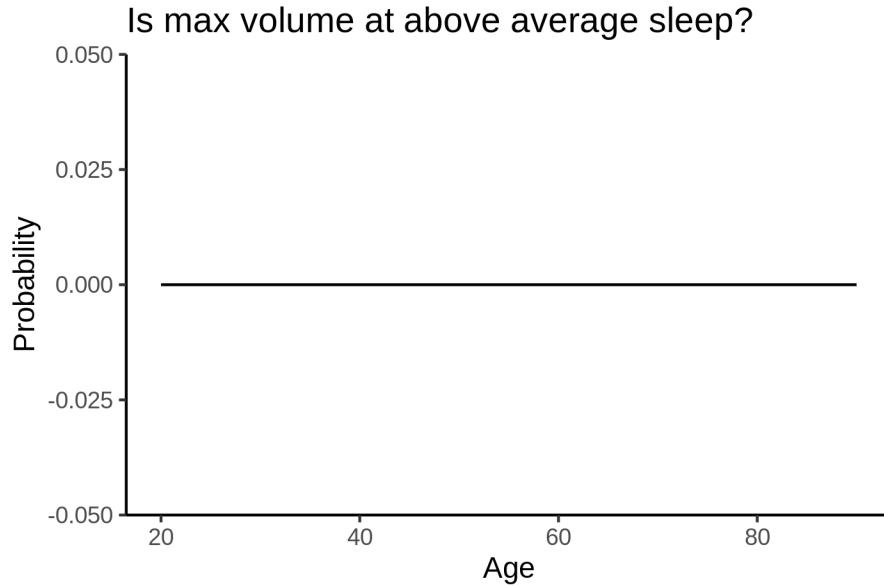

## Controlling for covariates

Below is the output for a model in which we only include data with income and education.

```
##
## Family: gaussian
## Link function: identity
##
## Formula:
## value ~ sex + site + s(age_z, k = 10, bs = "cr") + s(sleep_z,
##   k = 5, bs = "cr") + icv
## <environment: 0x558adb4f17f0>
##
## Parametric coefficients:
##           Estimate Std. Error t value Pr(>|t|)
## (Intercept)  555.8013   14.9399  37.203 < 2e-16 ***
## sexmale      -18.4100    1.6524 -11.141 < 2e-16 ***
## siteousAvanto -119.1874   18.6147  -6.403 1.55e-10 ***
## siteousPrisma -41.8377    18.4940  -2.262 0.0237 *
## siteousSkyra -111.3992   16.1943  -6.879 6.15e-12 ***
## siteUKB      -23.5825   14.9125  -1.581 0.1138
## siteUOXF     -15.0957   16.8079  -0.898 0.3691
## icv          32.3772    0.8492  38.128 < 2e-16 ***
## ---
## Signif. codes:  0 '***' 0.001 '**' 0.01 '*' 0.05 '.' 0.1 ' ' 1
##
## Approximate significance of smooth terms:
##           edf Ref.df      F p-value
## s(age_z)   5.218  5.218 608.285 < 2e-16 ***
## s(sleep_z) 1.000  1.000   9.265 0.00234 **
## ---
## Signif. codes:  0 '***' 0.001 '**' 0.01 '*' 0.05 '.' 0.1 ' ' 1
##
```

```
## R-sq.(adj) = 0.15
## lmer.REML = 3.8026e+05 Scale est. = 1585.3 n = 31185
```

Below is the output for a model in which we control for the main effects of income and education.

```
##
## Family: gaussian
## Link function: identity
##
## Formula:
## value ~ sex + site + s(age_z, k = 10, bs = "cr") + s(sleep_z,
##     k = 5, bs = "cr") + icv + income_scaled + education_scaled
## <environment: 0x558adb4f17f0>
##
## Parametric coefficients:
##           Estimate Std. Error t value Pr(>|t|)
## (Intercept)  561.7266    15.0377  37.354 < 2e-16 ***
## sexmale      -18.4897     1.6570 -11.159 < 2e-16 ***
## siteousAvanto -118.8309    18.6176  -6.383 1.76e-10 ***
## siteousPrisma -41.0324    18.4934  -2.219 0.0265 *
## siteousSkyra  -110.9974    16.1967  -6.853 7.36e-12 ***
## siteUKB       -23.4352    14.9228  -1.570 0.1163
## siteUOXF      -16.9538    16.8180  -1.008 0.3134
## icv           32.7587     0.8566  38.243 < 2e-16 ***
## income_scaled -2.9597     1.9667  -1.505 0.1324
## education_scaled -5.9524     2.3242  -2.561 0.0104 *
## ---
## Signif. codes:  0 '***' 0.001 '**' 0.01 '*' 0.05 '.' 0.1 ' ' 1
##
## Approximate significance of smooth terms:
##           edf Ref.df      F p-value
## s(age_z)   5.279  5.279 561.241 < 2e-16 ***
## s(sleep_z) 1.000  1.000  8.956 0.00277 **
## ---
## Signif. codes:  0 '***' 0.001 '**' 0.01 '*' 0.05 '.' 0.1 ' ' 1
##
## R-sq.(adj) = 0.151
## lmer.REML = 3.8024e+05 Scale est. = 1584.9 n = 31185
```

We also included interaction effects between sleep duration and education and income, in another model. The output is shown below, and the interaction terms are `income_scaled:sleep_z` and `education_scaled:sleep_z`.

```
##
## Family: gaussian
## Link function: identity
##
## Formula:
## value ~ sex + site + s(age_z, k = 10, bs = "cr") + s(sleep_z,
##     k = 5, bs = "cr") + icv + income_scaled + education_scaled +
##     income_scaled:sleep_z + education_scaled:sleep_z
## <environment: 0x558adb4f17f0>
##
## Parametric coefficients:
##           Estimate Std. Error t value Pr(>|t|)
## (Intercept)  561.8600    15.0390  37.360 < 2e-16 ***
```

```

## sexmale                -18.3803    1.6581 -11.085 < 2e-16 ***
## siteousAvanto          -118.7398   18.6180  -6.378 1.82e-10 ***
## siteousPrisma         -40.6528   18.4951  -2.198 0.0280 *
## siteousSkyra          -110.8987   16.1968  -6.847 7.68e-12 ***
## siteUKB                -23.5952   14.9246  -1.581 0.1139
## siteUOXF              -17.3015   16.8229  -1.028 0.3037
## icv                    32.7523    0.8567  38.232 < 2e-16 ***
## income_scaled         -3.0764    1.9678  -1.563 0.1180
## education_scaled      -5.8955    2.3244  -2.536 0.0112 *
## income_scaled:sleep_z  3.5910    1.9462   1.845 0.0650 .
## education_scaled:sleep_z -1.1372    2.2498  -0.505 0.6132
## ---
## Signif. codes:  0 '***' 0.001 '**' 0.01 '*' 0.05 '.' 0.1 ' ' 1
##
## Approximate significance of smooth terms:
##           edf Ref.df      F p-value
## s(age_z)  5.293  5.293 560.334 <2e-16 ***
## s(sleep_z) 1.000  1.000   2.303  0.129
## ---
## Signif. codes:  0 '***' 0.001 '**' 0.01 '*' 0.05 '.' 0.1 ' ' 1
##
## R-sq.(adj) =  0.151
## lmer.REML = 3.8023e+05  Scale est. = 1584.9    n = 31185

```

We did the same controlling for BMI. Below is the model with no covariates but only keeping data with BMI.

```

##
## Family: gaussian
## Link function: identity
##
## Formula:
## value ~ sex + site + s(age_z, k = 10, bs = "cr") + s(sleep_z,
##           k = 5, bs = "cr") + icv
## <environment: 0x558a48640ae0>
##
## Parametric coefficients:
##           Estimate Std. Error t value Pr(>|t|)
## (Intercept)  449.3776    11.3326  39.653 < 2e-16 ***
## sexmale      -17.4913     1.5998 -10.933 < 2e-16 ***
## siteousPrisma  64.7979    14.6793   4.414 1.02e-05 ***
## siteousSkyra   1.8439     9.4843   0.194  0.846
## siteUCAM       51.1513    11.8342   4.322 1.55e-05 ***
## siteUKB        83.1626    11.4105   7.288 3.21e-13 ***
## siteUmU        70.3292    13.1408   5.352 8.76e-08 ***
## icv            32.1600     0.8249  38.987 < 2e-16 ***
## ---
## Signif. codes:  0 '***' 0.001 '**' 0.01 '*' 0.05 '.' 0.1 ' ' 1
##
## Approximate significance of smooth terms:
##           edf Ref.df      F p-value
## s(age_z)  5.961  5.961 574.971 < 2e-16 ***
## s(sleep_z) 1.053  1.053   8.751 0.00252 **
## ---
## Signif. codes:  0 '***' 0.001 '**' 0.01 '*' 0.05 '.' 0.1 ' ' 1
##

```

```
## R-sq.(adj) = 0.153
## lmer.REML = 4.0694e+05 Scale est. = 1477.4 n = 33427
```

Below is the model output with main effect.

```
##
## Family: gaussian
## Link function: identity
##
## Formula:
## value ~ sex + site + s(age_z, k = 10, bs = "cr") + s(sleep_z,
##     k = 5, bs = "cr") + icv + bmi
## <environment: 0x558a48640ae0>
##
## Parametric coefficients:
##           Estimate Std. Error t value Pr(>|t|)
## (Intercept) 470.8131   11.9908  39.264 < 2e-16 ***
## sexmale     -16.8099    1.6039 -10.481 < 2e-16 ***
## siteousPrisma 65.7366   14.6763   4.479 7.52e-06 ***
## siteousSkyra  2.0169    9.4839   0.213  0.832
## siteUCAM     51.6584   11.8325   4.366 1.27e-05 ***
## siteUKB      83.8436   11.4100   7.348 2.05e-13 ***
## siteUmU      71.2178   13.1390   5.420 5.99e-08 ***
## icv          32.2968    0.8251  39.143 < 2e-16 ***
## bmi         -0.8509    0.1557  -5.466 4.64e-08 ***
## ---
## Signif. codes:  0 '***' 0.001 '**' 0.01 '*' 0.05 '.' 0.1 ' ' 1
##
## Approximate significance of smooth terms:
##           edf Ref.df      F p-value
## s(age_z)   5.994  5.994 572.68 < 2e-16 ***
## s(sleep_z) 1.583  1.583   5.96 0.00368 **
## ---
## Signif. codes:  0 '***' 0.001 '**' 0.01 '*' 0.05 '.' 0.1 ' ' 1
##
## R-sq.(adj) = 0.154
## lmer.REML = 4.0691e+05 Scale est. = 1477.3 n = 33427
```

Next is the model with BMI-sleep interaction.

```
##
## Family: gaussian
## Link function: identity
##
## Formula:
## value ~ sex + site + s(age_z, k = 10, bs = "cr") + s(sleep_z,
##     k = 5, bs = "cr") + icv + bmi + bmi:sleep_z
## <environment: 0x558a48640ae0>
##
## Parametric coefficients:
##           Estimate Std. Error t value Pr(>|t|)
## (Intercept) 470.88875   11.99589  39.254 < 2e-16 ***
## sexmale     -16.81142    1.60392 -10.481 < 2e-16 ***
## siteousPrisma 65.73333   14.67645   4.479 7.53e-06 ***
## siteousSkyra  2.00678    9.48402   0.212  0.832
## siteUCAM     51.62851   11.83340   4.363 1.29e-05 ***
```

```

## siteUKB      83.81257   11.41090    7.345 2.11e-13 ***
## siteUmU      71.19076   13.13968    5.418 6.07e-08 ***
## icv          32.29504    0.82512   39.140 < 2e-16 ***
## bmi         -0.85196    0.15576   -5.470 4.54e-08 ***
## bmi:sleep_z -0.03294    0.14741   -0.223 0.823
## ---
## Signif. codes:  0 '***' 0.001 '**' 0.01 '*' 0.05 '.' 0.1 ' ' 1
##
## Approximate significance of smooth terms:
##           edf Ref.df      F p-value
## s(age_z)  5.994  5.994 572.449 <2e-16 ***
## s(sleep_z) 1.567  1.567  0.186  0.713
## ---
## Signif. codes:  0 '***' 0.001 '**' 0.01 '*' 0.05 '.' 0.1 ' ' 1
##
## R-sq.(adj) =  0.154
## lmer.REML = 4.0691e+05  Scale est. = 1477.3    n = 33427

```

We did the same controlling for depression. Below is the model with no covariates but only keeping data with depression.

```

##
## Family: gaussian
## Link function: identity
##
## Formula:
## value ~ sex + site + s(age_z, k = 10, bs = "cr") + s(sleep_z,
##           k = 5, bs = "cr") + icv
## <environment: 0x558a470629c8>
##
## Parametric coefficients:
##           Estimate Std. Error t value Pr(>|t|)
## (Intercept)  542.1358     7.5572  71.737 < 2e-16 ***
## sexmale      -17.5721     1.6067 -10.936 < 2e-16 ***
## siteousAvanto -101.3186    17.7317  -5.714 1.11e-08 ***
## siteousPrisma -30.0581    14.7351  -2.040 0.0414 *
## siteousSkyra  -101.5079    11.4459  -8.869 < 2e-16 ***
## siteUCAM      -47.6812    10.3543  -4.605 4.14e-06 ***
## siteUKB       -10.0733     7.4714  -1.348 0.1776
## siteUmU       -23.6996    10.1956  -2.324 0.0201 *
## icv           31.8265     0.8272  38.475 < 2e-16 ***
## ---
## Signif. codes:  0 '***' 0.001 '**' 0.01 '*' 0.05 '.' 0.1 ' ' 1
##
## Approximate significance of smooth terms:
##           edf Ref.df      F p-value
## s(age_z)  5.56  5.56 600.81 < 2e-16 ***
## s(sleep_z) 1.00  1.00  9.16 0.00248 **
## ---
## Signif. codes:  0 '***' 0.001 '**' 0.01 '*' 0.05 '.' 0.1 ' ' 1
##
## R-sq.(adj) =  0.15
## lmer.REML = 4.0564e+05  Scale est. = 1433    n = 33339

```

Below is the model output with main effect.

```

##
## Family: gaussian
## Link function: identity
##
## Formula:
## value ~ sex + site + s(age_z, k = 10, bs = "cr") + s(sleep_z,
##     k = 5, bs = "cr") + icv + depression
## <environment: 0x558a470629c8>
##
## Parametric coefficients:
##           Estimate Std. Error t value Pr(>|t|)
## (Intercept)  542.4867     7.5917  71.458 < 2e-16 ***
## sexmale      -17.6065     1.6083 -10.947 < 2e-16 ***
## siteousAvanto -101.1405    17.7354  -5.703 1.19e-08 ***
## siteousPrisma -29.9018    14.7389  -2.029  0.0425 *
## siteousSkyra -101.3074    11.4533  -8.845 < 2e-16 ***
## siteUCAM     -47.6006    10.3559  -4.596 4.31e-06 ***
## siteUKB     -10.2256     7.4780  -1.367  0.1715
## siteUmU     -22.6760    10.4108  -2.178  0.0294 *
## icv         31.8295     0.8272  38.477 < 2e-16 ***
## depression   -2.7696     5.6967  -0.486  0.6269
## ---
## Signif. codes:  0 '***' 0.001 '**' 0.01 '*' 0.05 '.' 0.1 ' ' 1
##
## Approximate significance of smooth terms:
##           edf Ref.df      F p-value
## s(age_z)   5.565  5.565 590.232 < 2e-16 ***
## s(sleep_z) 1.000  1.000  9.322 0.00227 **
## ---
## Signif. codes:  0 '***' 0.001 '**' 0.01 '*' 0.05 '.' 0.1 ' ' 1
##
## R-sq.(adj) =  0.15
## lmer.REML = 4.0563e+05  Scale est. = 1433      n = 33339

```

Next is the model with depression-sleep interaction.

```

##
## Family: gaussian
## Link function: identity
##
## Formula:
## value ~ sex + site + s(age_z, k = 10, bs = "cr") + s(sleep_z,
##     k = 5, bs = "cr") + icv + depression + depression:sleep_z
## <environment: 0x558a470629c8>
##
## Parametric coefficients:
##           Estimate Std. Error t value Pr(>|t|)
## (Intercept)  542.4812     7.5914  71.460 < 2e-16 ***
## sexmale      -17.6582     1.6085 -10.978 < 2e-16 ***
## siteousAvanto -101.5506    17.7365  -5.726 1.04e-08 ***
## siteousPrisma -30.2976    14.7397  -2.056  0.0398 *
## siteousSkyra -101.6999    11.4546  -8.878 < 2e-16 ***
## siteUCAM     -47.9891    10.3576  -4.633 3.61e-06 ***
## siteUKB     -10.2022     7.4777  -1.364  0.1725
## siteUmU     -20.2439    10.4960  -1.929  0.0538 .

```



```

## icv          31.8355      0.8272  38.486 < 2e-16 ***
## depression   -3.3475      5.7053  -0.587  0.5574
## depression:sleep_z -7.5644  4.1621  -1.817  0.0692 .
## ---
## Signif. codes:  0 '***' 0.001 '**' 0.01 '*' 0.05 '.' 0.1 ' ' 1
##
## Approximate significance of smooth terms:
##          edf Ref.df      F p-value
## s(age_z)  5.563  5.563 590.870 <2e-16 ***
## s(sleep_z) 1.000  1.000  2.573  0.109
## ---
## Signif. codes:  0 '***' 0.001 '**' 0.01 '*' 0.05 '.' 0.1 ' ' 1
##
## R-sq.(adj) =  0.15
## lmer.REML = 4.0563e+05  Scale est. = 1433      n = 33339

```

The plot below shows the sleep-volume curve for the original model and for the model with main effects of SES.

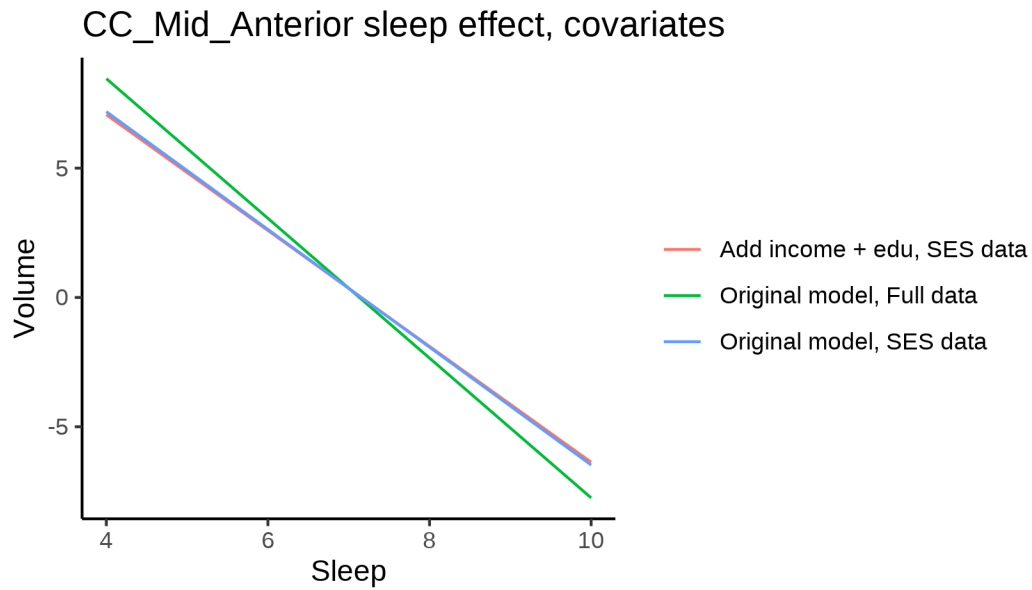

The plot below shows the sleep-volume curve for the original model and for the model with main effects of BMI.

### CC\_Mid\_Anterior sleep effect, covariates

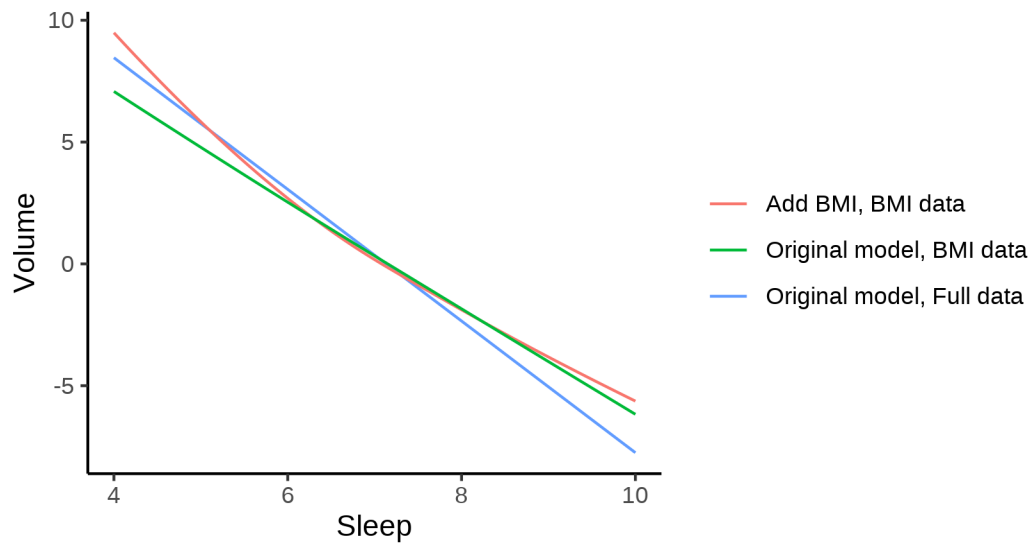

The plot below shows the sleep-volume curve for the original model and for the model with main effects of depression.

### CC\_Mid\_Anterior sleep effect, covariates

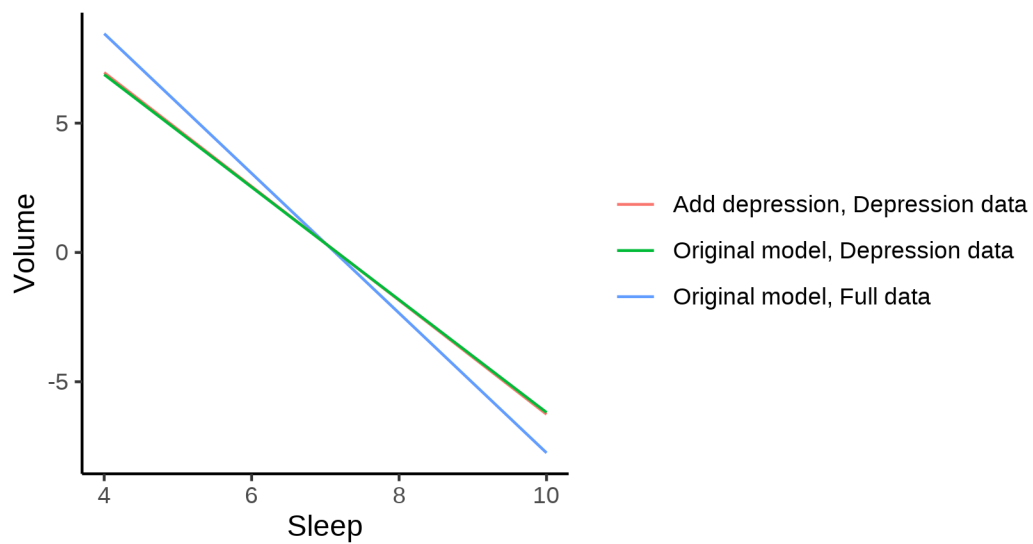

## Models Not controlling for ICV

### Model outputs

Model without sleep term

```
##  
## Family: gaussian  
## Link function: identity  
##  
## Formula:
```

```

## value ~ sex + site + s(age_z, k = 10, bs = "cr")
## <environment: 0x558b6057dab8>
##
## Parametric coefficients:
##           Estimate Std. Error t value Pr(>|t|)
## (Intercept)   534.311     6.525  81.892 < 2e-16 ***
## sexmale       17.891     1.100  16.269 < 2e-16 ***
## siteMPIB     -49.407     8.282  -5.965 2.46e-09 ***
## siteousAvanto -90.688     6.805 -13.328 < 2e-16 ***
## siteousPrisma -32.112    11.544  -2.782 0.00541 **
## siteousSkyra  -98.919     6.364 -15.543 < 2e-16 ***
## siteUB       -83.260    19.531  -4.263 2.02e-05 ***
## siteUCAM     -50.546     7.242  -6.980 2.99e-12 ***
## siteUKB     -16.331     6.703  -2.436 0.01484 *
## siteUmU     -50.212     9.358  -5.366 8.10e-08 ***
## siteUOXF    -14.669     7.942  -1.847 0.06476 .
## ---
## Signif. codes:  0 '***' 0.001 '**' 0.01 '*' 0.05 '.' 0.1 ' ' 1
##
## Approximate significance of smooth terms:
##           edf Ref.df      F p-value
## s(age_z) 6.307  6.307 889.9 <2e-16 ***
## ---
## Signif. codes:  0 '***' 0.001 '**' 0.01 '*' 0.05 '.' 0.1 ' ' 1
##
## R-sq.(adj) = 0.123
## lmer.REML = 6.2756e+05  Scale est. = 1343.2    n = 51267

```

Model with only main effects of age and sleep

```

##
## Family: gaussian
## Link function: identity
##
## Formula:
## value ~ sex + site + s(age_z, k = 10, bs = "cr") + s(sleep_z,
##           k = 5, bs = "cr")
## <environment: 0x558b6057dab8>
##
## Parametric coefficients:
##           Estimate Std. Error t value Pr(>|t|)
## (Intercept)   533.516     6.530  81.707 < 2e-16 ***
## sexmale       17.883     1.100  16.257 < 2e-16 ***
## siteMPIB     -48.422     8.285  -5.844 5.12e-09 ***
## siteousAvanto -90.325     6.806 -13.272 < 2e-16 ***
## siteousPrisma -31.877    11.543  -2.761 0.00576 **
## siteousSkyra  -98.577     6.365 -15.486 < 2e-16 ***
## siteUB       -82.805    19.528  -4.240 2.24e-05 ***
## siteUCAM     -50.037     7.242  -6.910 4.91e-12 ***
## siteUKB     -15.497     6.708  -2.310 0.02087 *
## siteUmU     -48.094     9.377  -5.129 2.93e-07 ***
## siteUOXF    -14.271     7.941  -1.797 0.07233 .
## ---
## Signif. codes:  0 '***' 0.001 '**' 0.01 '*' 0.05 '.' 0.1 ' ' 1
##

```

```

## Approximate significance of smooth terms:
##           edf Ref.df      F p-value
## s(age_z)   6.287  6.287 881.579 < 2e-16 ***
## s(sleep_z) 2.049  2.049  6.463 0.00127 **
## ---
## Signif. codes:  0 '***' 0.001 '**' 0.01 '*' 0.05 '.' 0.1 ' ' 1
##
## R-sq.(adj) =  0.123
## lmer.REML = 6.2754e+05  Scale est. = 1343.3    n = 51267

Model with full interaction between age and sleep

##
## Family: gaussian
## Link function: identity
##
## Formula:
## value ~ sex + site + t2(age_z, sleep_z, k = c(10, 4), bs = "cr")
## <environment: 0x558b6057dab8>
##
## Parametric coefficients:
##           Estimate Std. Error t value Pr(>|t|)
## (Intercept)  533.358     6.556  81.354 < 2e-16 ***
## sexmale      17.806     1.102  16.155 < 2e-16 ***
## siteMPIB     -48.478     8.329  -5.820 5.91e-09 ***
## siteousAvanto -90.386     6.841 -13.212 < 2e-16 ***
## siteousPrisma -32.109    11.567  -2.776 0.00551 **
## siteousSkyra  -98.556     6.406 -15.384 < 2e-16 ***
## siteUB       -82.677    19.541  -4.231 2.33e-05 ***
## siteUCAM     -49.968     7.283  -6.861 6.93e-12 ***
## siteUKB      -15.289     6.734  -2.271 0.02318 *
## siteUmU      -48.420     9.408  -5.147 2.66e-07 ***
## siteUOXF     -13.904     7.971  -1.744 0.08111 .
## ---
## Signif. codes:  0 '***' 0.001 '**' 0.01 '*' 0.05 '.' 0.1 ' ' 1
##
## Approximate significance of smooth terms:
##           edf Ref.df      F p-value
## t2(age_z,sleep_z) 10.23  10.23 14.77 <2e-16 ***
## ---
## Signif. codes:  0 '***' 0.001 '**' 0.01 '*' 0.05 '.' 0.1 ' ' 1
##
## R-sq.(adj) =  0.123
## lmer.REML = 6.2755e+05  Scale est. = 1342.9    n = 51267

```

## Model comparison

`mod_no_sleep` refers to model without sleep term, `mod_no_interaction` refers to model with only main effect of sleep, and `mod_full` refers to model with a full interaction between age and sleep. This is a nested model comparison, and the p-value at a given line refers to comparing the model at the line to the model on the line above. Hence, significance implies that the more complicated model is supported on statistical grounds.

To be even more specific, the p-value on the second row tests whether there is an association between sleep and volume. The p-value on the third row tests whether this association depends on age.

```

## Data: NULL
## Models:
## ml$mod_no_sleep$mer: NULL
## ml$mod_no_interaction$mer: NULL
## ml$mod_full$mer: NULL
##
##          npar    AIC    BIC logLik deviance Chisq Df Pr(>Chisq)
## ml$mod_no_sleep$mer      15 627586 627718 -313778    627556
## ml$mod_no_interaction$mer 17 627579 627729 -313772    627545 10.976  2   0.004136 **
## ml$mod_full$mer          19 627586 627754 -313774    627548  0.000  2   1.000000
## ---
## Signif. codes:  0 '***' 0.001 '**' 0.01 '*' 0.05 '.' 0.1 ' ' 1

```

We chose the model based on the likelihood ratio test with 5 % significance level, which was `mod_no_interaction`.

### Lifespan brain trajectory

The trajectory shown is from the chosen model `mod_no_interaction_no_icv`.

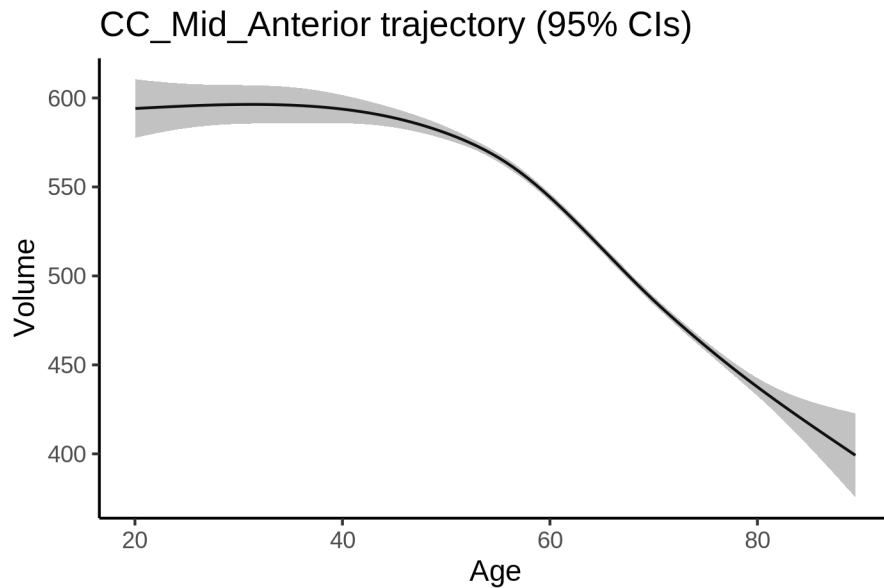

### Effect of sleep

The chosen model only included the main effect of sleep, and hence the effect does not vary with age. The black dot shows the average sleep duration across all ages in the sample.

CC\_Mid\_Anterior sleep effect (95% CIs)

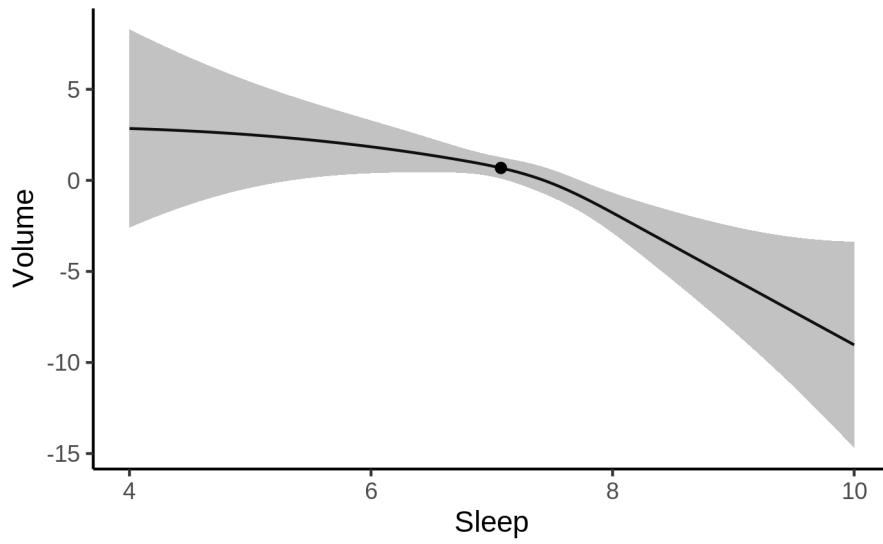

We also show the full interaction model for completeness, although it was not selected.

CC\_Mid\_Anterior sleep effect (95% CIs)

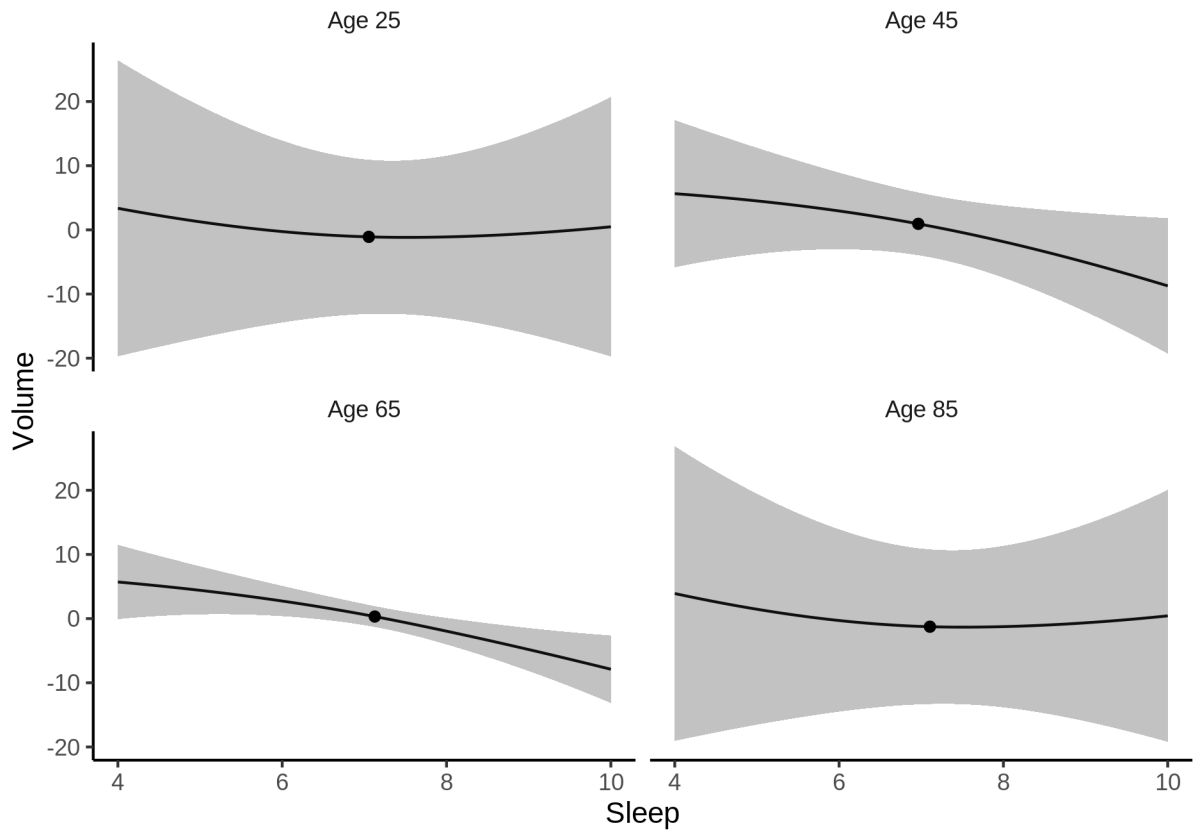

### Deviation from sleep associated with maximal volume

Model with only main effect of sleep was chosen, so we show it for all ages at once. Maximum volume is attained at 4 hours of sleep. The percentage values in the plot are calculated as follows: The maximum at 100 % refers to a person at an arbitrary age with a sleep duration associated with maximum volume. For a female, this volume is 533 and for a male it is 551. The other percentage values show how large the expected volume is for someone with other sleep durations. For example, 99 % implies a 1 % reduction.

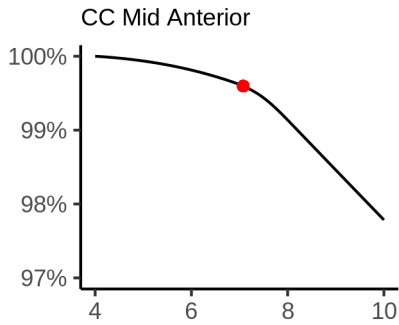

### Comparison of mean sleep and sleep associated with maximum volume

A 95 % confidence interval for the sleep associated with maximum volume is [4, 6.73]. The plot below compares average sleep to the sleep associated with maximum volume.

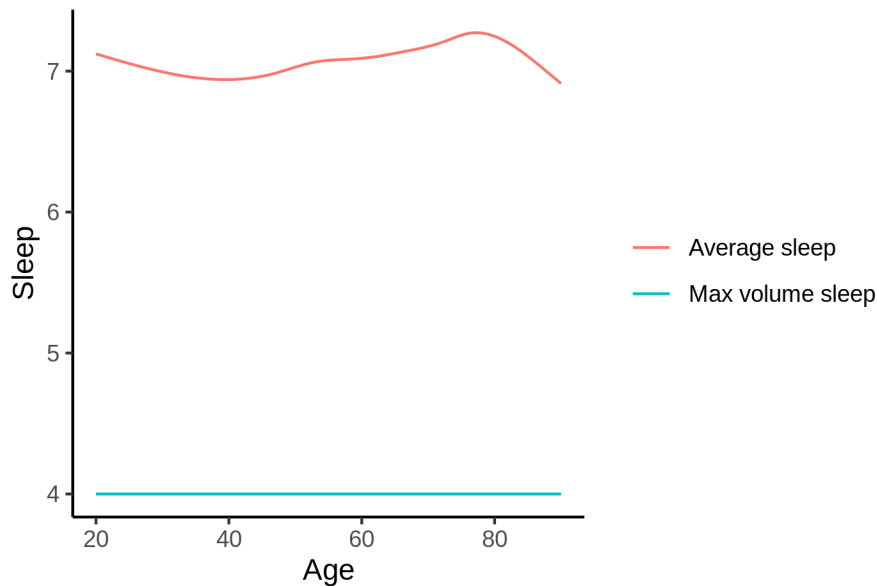

The next plot shows the difference between average sleep and sleep associated with maximum volume. The shaded region is a 95 % confidence interval.

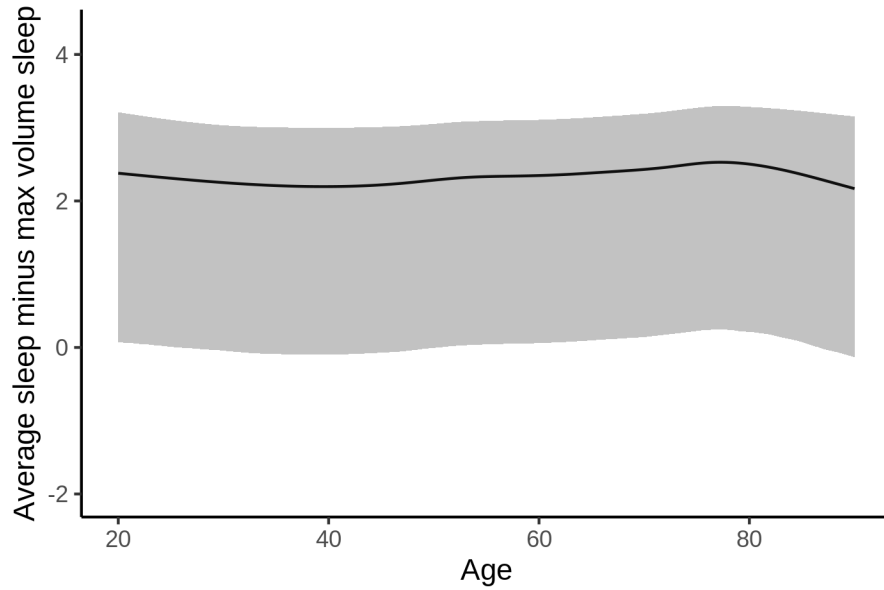

The next plot shows the probability that the sleep duration associated with maximum volume is longer than the average sleep duration, as a function of age. Probability below .05 can be interpreted as evidence that the sleep associated with maximum volume is shorter than the mean sleep, and probability above .95 can be interpreted the opposite way.

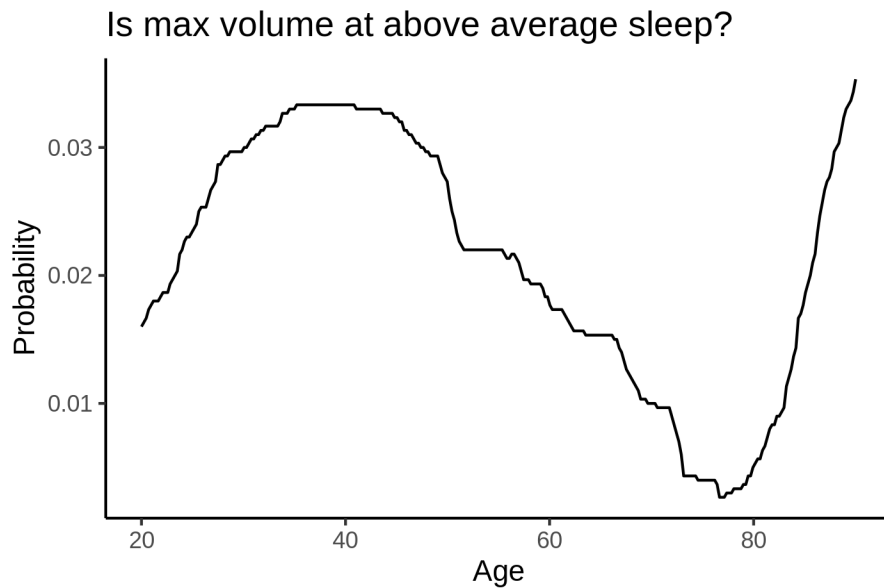

## CC\_Mid\_Posterior

### Descriptive statistics

| Study | Observations | Unique IDs | Mean age | Age range |
|-------|--------------|------------|----------|-----------|
| HCP   | 974          | 974        | 28.8     | 22 - 37   |
| MPIB  | 677          | 391        | 63.1     | 24 - 83   |



| Study | Observations | Unique IDs | Mean age | Age range |
|-------|--------------|------------|----------|-----------|
| UB    | 113          | 39         | 70.9     | 64 - 81   |
| UCAM  | 884          | 632        | 55.1     | 20 - 88   |
| UiO   | 1475         | 803        | 49.4     | 20 - 89   |
| UKB   | 45944        | 43120      | 64.5     | 45 - 83   |
| UmU   | 412          | 279        | 62.2     | 25 - 85   |
| UOXF  | 769          | 769        | 69.8     | 60 - 85   |

## Spaghetti plot

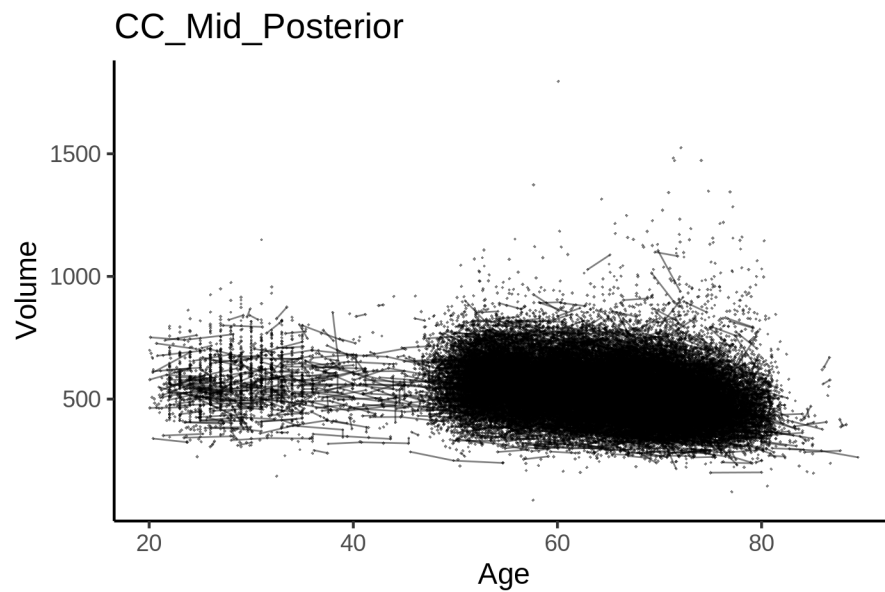

## Models Controlling for ICV

### Model outputs

Model without sleep term

```
##
## Family: gaussian
## Link function: identity
##
## Formula:
## value ~ sex + site + icv + s(age_z, k = 10, bs = "cr")
## <environment: 0x558963829d10>
##
## Parametric coefficients:
##              Estimate Std. Error t value Pr(>|t|)
## (Intercept)  526.4579    5.6779  92.721 < 2e-16 ***
## sexmale      -18.4762    1.1774 -15.692 < 2e-16 ***
## siteMPIB     14.6888    7.3224  2.006  0.0449 *
## siteousAvanto -60.7891    5.8413 -10.407 < 2e-16 ***
## siteousPrisma -21.6652    9.9162  -2.185  0.0289 *
## siteousSkyra  -76.2296    5.5690 -13.688 < 2e-16 ***
```

```

## siteUB      -44.2387    17.2900  -2.559   0.0105 *
## siteUCAM    -29.2563     6.3359  -4.618  3.89e-06 ***
## siteUKB      23.6146     5.8199   4.058  4.97e-05 ***
## siteUmU     -13.9926     8.2045  -1.705   0.0881 .
## siteUOXF    -6.6890     6.9237  -0.966   0.3340
## icv         27.3397     0.5917  46.207 < 2e-16 ***
## ---
## Signif. codes:  0 '***' 0.001 '**' 0.01 '*' 0.05 '.' 0.1 ' ' 1
##
## Approximate significance of smooth terms:
##           edf Ref.df      F p-value
## s(age_z)  6.555  6.555 460.9 <2e-16 ***
## ---
## Signif. codes:  0 '***' 0.001 '**' 0.01 '*' 0.05 '.' 0.1 ' ' 1
##
## R-sq.(adj) =  0.124
## lmer.REML = 6.1274e+05  Scale est. = 737.91    n = 51248

```

Model with only main effects of age and sleep

```

##
## Family: gaussian
## Link function: identity
##
## Formula:
## value ~ sex + site + icv + s(age_z, k = 10, bs = "cr") + s(sleep_z,
##           k = 5, bs = "cr")
## <environment: 0x558963829d10>
##
## Parametric coefficients:
##           Estimate Std. Error t value Pr(>|t|)
## (Intercept)  526.2690     5.6829  92.606 < 2e-16 ***
## sexmale      -18.4917     1.1775 -15.705 < 2e-16 ***
## siteMPIB      15.0131     7.3269   2.049  0.0405 *
## siteousAvanto -60.7267     5.8427 -10.394 < 2e-16 ***
## siteousPrisma -21.6266     9.9163  -2.181  0.0292 *
## siteousSkyra  -76.1794     5.5707 -13.675 < 2e-16 ***
## siteUB        -44.0650    17.2893  -2.549  0.0108 *
## siteUCAM      -29.1036     6.3366  -4.593  4.38e-06 ***
## siteUKB       23.8191     5.8255   4.089  4.34e-05 ***
## siteUmU       -13.2967     8.2231  -1.617  0.1059
## siteUOXF      -6.6060     6.9242  -0.954  0.3401
## icv           27.3386     0.5921  46.170 < 2e-16 ***
## ---
## Signif. codes:  0 '***' 0.001 '**' 0.01 '*' 0.05 '.' 0.1 ' ' 1
##
## Approximate significance of smooth terms:
##           edf Ref.df      F p-value
## s(age_z)    6.547  6.547 457.357 <2e-16 ***
## s(sleep_z)  1.721  1.721   2.398  0.208
## ---
## Signif. codes:  0 '***' 0.001 '**' 0.01 '*' 0.05 '.' 0.1 ' ' 1
##
## R-sq.(adj) =  0.124
## lmer.REML = 6.1274e+05  Scale est. = 737.9    n = 51248

```

Model with full interaction between age and sleep

```
##
## Family: gaussian
## Link function: identity
##
## Formula:
## value ~ sex + site + icv + t2(age_z, sleep_z, k = c(10, 4), bs = "cr")
## <environment: 0x558963829d10>
##
## Parametric coefficients:
##           Estimate Std. Error t value Pr(>|t|)
## (Intercept)  526.7810     5.6978  92.453 < 2e-16 ***
## sexmale      -18.5333     1.1799 -15.708 < 2e-16 ***
## siteMPIB      14.5936     7.3615   1.982  0.0474 *
## siteousAvanto -61.1165     5.8720 -10.408 < 2e-16 ***
## siteousPrisma -21.9813     9.9366  -2.212  0.0270 *
## siteousSkyra  -76.5169     5.6036 -13.655 < 2e-16 ***
## siteUB        -44.6157    17.2979  -2.579  0.0099 **
## siteUCAM      -29.5530     6.3676  -4.641 3.47e-06 ***
## siteUKB       23.3101     5.8400   3.991 6.58e-05 ***
## siteUmU       -13.8046     8.2448  -1.674  0.0941 .
## siteUOXF      -7.0923     6.9435  -1.021  0.3071
## icv           27.3435     0.5921  46.180 < 2e-16 ***
## ---
## Signif. codes:  0 '***' 0.001 '**' 0.01 '*' 0.05 '.' 0.1 ' ' 1
##
## Approximate significance of smooth terms:
##           edf Ref.df    F p-value
## t2(age_z,sleep_z) 10.93  10.93 10.15 <2e-16 ***
## ---
## Signif. codes:  0 '***' 0.001 '**' 0.01 '*' 0.05 '.' 0.1 ' ' 1
##
## R-sq.(adj) =  0.124
## lmer.REML = 6.1274e+05  Scale est. = 737.76    n = 51248
```

## Model comparison

`mod_no_sleep` refers to model without sleep term, `mod_no_interaction` refers to model with only main effect of sleep, and `mod_full` refers to model with a full interaction between age and sleep. This is a nested model comparison, and the p-value at a given line refers to comparing the model at the line to the model on the line above. Hence, significance implies that the more complicated model is supported on statistical grounds.

To be even more specific, the p-value on the second row tests whether there is an association between sleep and volume. The p-value on the third row tests whether this association depends on age.

```
## Data: NULL
## Models:
## ml$mod_no_sleep$mer: NULL
## ml$mod_no_interaction$mer: NULL
## ml$mod_full$mer: NULL
##           npar    AIC    BIC logLik deviance Chisq Df Pr(>Chisq)
## ml$mod_no_sleep$mer      16 612769 612911 -306369    612737
## ml$mod_no_interaction$mer  18 612772 612931 -306368    612736 1.6528  2    0.4376
```

```
## ml$mod_full$mer          20 612779 612955 -306369 612739 0.0000 2 1.0000
```

We chose the model based on the likelihood ratio test with 5 % significance level, which was `mod_no_sleep`.

### Lifespan brain trajectory

The trajectory shown is from the chosen model `mod_no_sleep`.

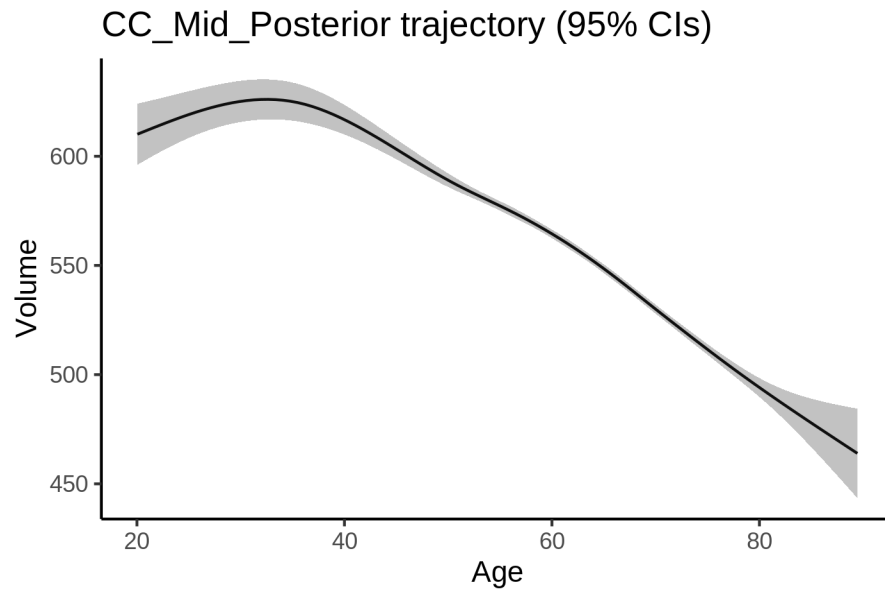

### Effect of sleep

The chosen model did not include a sleep term, and hence we don't have any estimated effect of sleep.

We show the full interaction model for completeness, although it was not selected.

## CC\_Mid\_Posterior sleep effect (95% CIs)

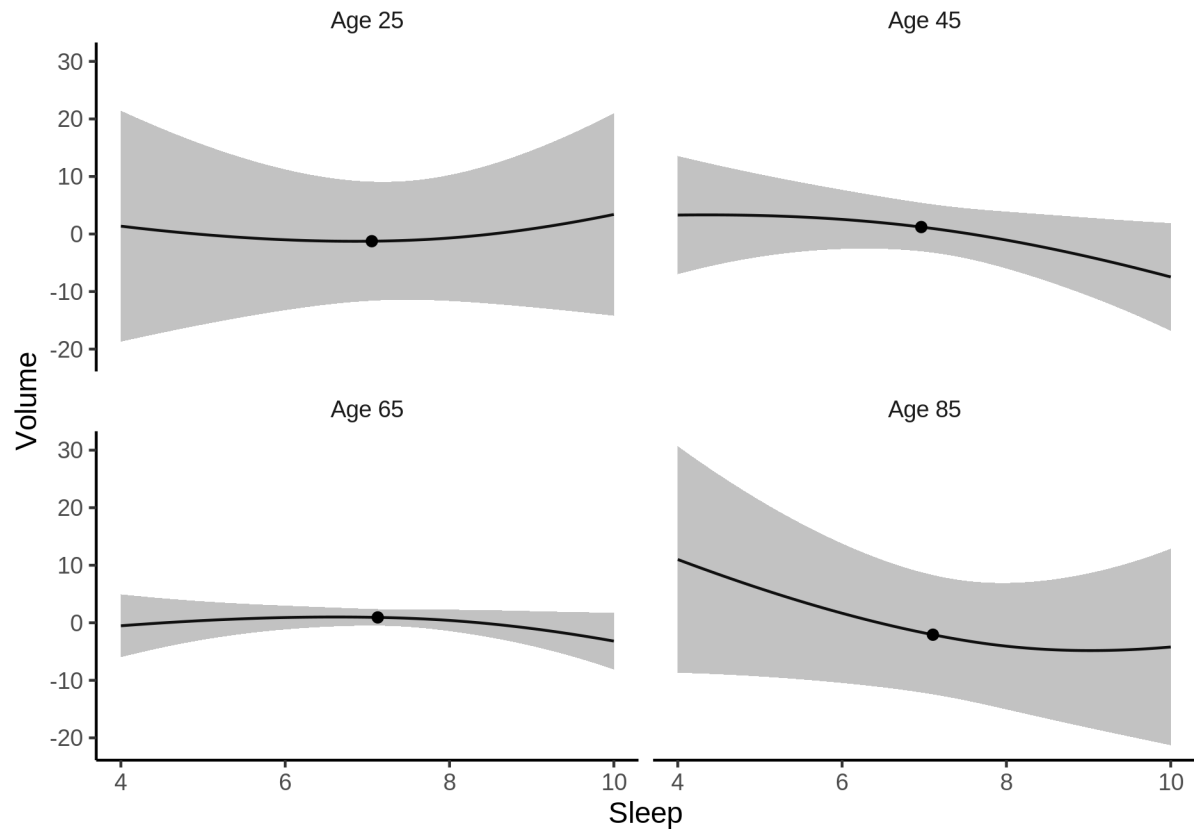

### Deviation from sleep associated with maximal volume

Model with no sleep term was selected. No plots to show. (Although we can of course dig up the plots, which will be pretty flat).

### Comparison of mean sleep and sleep associated with maximum volume

Nothing to show, as we did not find an association between sleep and volume.

### Controlling for covariates

Below is the output for a model in which we only include data with income and education.

```
##
## Family: gaussian
## Link function: identity
##
## Formula:
## value ~ sex + site + s(age_z, k = 10, bs = "cr") + s(sleep_z,
##   k = 5, bs = "cr") + icv
## <environment: 0x558a4ab49d80>
##
## Parametric coefficients:
```

```

##           Estimate Std. Error t value Pr(>|t|)
## (Intercept)   531.399    13.646  38.943 < 2e-16 ***
## sexmale      -18.919     1.508 -12.548 < 2e-16 ***
## siteousAvanto -72.440    16.379  -4.423 9.78e-06 ***
## siteousPrisma -29.602    16.810  -1.761 0.0782 .
## siteousSkyra  -81.703    14.836  -5.507 3.68e-08 ***
## siteUKB       17.200     13.616   1.263 0.2065
## siteUOXF     -14.930    15.345  -0.973 0.3306
## icv           28.695     0.774  37.072 < 2e-16 ***
## ---
## Signif. codes:  0 '***' 0.001 '**' 0.01 '*' 0.05 '.' 0.1 ' ' 1
##
## Approximate significance of smooth terms:
##           edf Ref.df      F p-value
## s(age_z)   4.220 4.220 385.916 <2e-16 ***
## s(sleep_z) 1.628 1.628  0.305  0.592
## ---
## Signif. codes:  0 '***' 0.001 '**' 0.01 '*' 0.05 '.' 0.1 ' ' 1
##
## R-sq.(adj) =  0.106
## lmer.REML = 3.7337e+05  Scale est. = 832.95    n = 31173

```

Below is the output for a model in which we control for the main effects of income and education.

```

##
## Family: gaussian
## Link function: identity
##
## Formula:
## value ~ sex + site + s(age_z, k = 10, bs = "cr") + s(sleep_z,
##           k = 5, bs = "cr") + icv + income_scaled + education_scaled
## <environment: 0x558a4ab49d80>
##
## Parametric coefficients:
##           Estimate Std. Error t value Pr(>|t|)
## (Intercept)   528.740982  13.723365  38.529 < 2e-16 ***
## sexmale      -19.093018   1.511886 -12.629 < 2e-16 ***
## siteousAvanto -71.899113  16.378732  -4.390 1.14e-05 ***
## siteousPrisma -29.770209  16.806516  -1.771 0.0765 .
## siteousSkyra  -81.212463  14.837373  -5.474 4.45e-08 ***
## siteUKB       17.954970  13.614773   1.319 0.1873
## siteUOXF     -13.766604  15.344999  -0.897 0.3697
## icv           28.511600   0.780628  36.524 < 2e-16 ***
## income_scaled  4.206282   1.793564   2.345 0.0190 *
## education_scaled 0.007938   2.122795   0.004 0.9970
## ---
## Signif. codes:  0 '***' 0.001 '**' 0.01 '*' 0.05 '.' 0.1 ' ' 1
##
## Approximate significance of smooth terms:
##           edf Ref.df      F p-value
## s(age_z)   4.104 4.104 352.244 <2e-16 ***
## s(sleep_z) 1.359 1.359  0.118  0.725
## ---
## Signif. codes:  0 '***' 0.001 '**' 0.01 '*' 0.05 '.' 0.1 ' ' 1
##

```

```
## R-sq.(adj) = 0.107
## lmer.REML = 3.7336e+05 Scale est. = 833.44 n = 31173
```

We also included interaction effects between sleep duration and education and income, in another model. The output is shown below, and the interaction terms are `income_scaled:sleep_z` and `education_scaled:sleep_z`.

```
##
## Family: gaussian
## Link function: identity
##
## Formula:
## value ~ sex + site + s(age_z, k = 10, bs = "cr") + s(sleep_z,
##     k = 5, bs = "cr") + icv + income_scaled + education_scaled +
##     income_scaled:sleep_z + education_scaled:sleep_z
## <environment: 0x558a4ab49d80>
##
## Parametric coefficients:
##               Estimate Std. Error t value Pr(>|t|)
## (Intercept)    528.48501   13.72341  38.510 < 2e-16 ***
## sexmale        -18.99006    1.51289 -12.552 < 2e-16 ***
## siteousAvanto  -71.60894   16.37879  -4.372 1.23e-05 ***
## siteousPrisma  -29.23597   16.80780  -1.739  0.0820 .
## siteousSkyra   -80.93085   14.83713  -5.455 4.95e-08 ***
## siteUKB        18.23289   13.61581   1.339  0.1805
## siteUOXF       -13.39657   15.34894  -0.873  0.3828
## icv            28.49346    0.78063  36.500 < 2e-16 ***
## income_scaled   4.12342    1.79370   2.299  0.0215 *
## education_scaled 0.09451    2.12265   0.045  0.9645
## income_scaled:sleep_z 2.35731    1.77758   1.326  0.1848
## education_scaled:sleep_z -4.03540    2.05515  -1.964  0.0496 *
## ---
## Signif. codes:  0 '***' 0.001 '**' 0.01 '*' 0.05 '.' 0.1 ' ' 1
##
## Approximate significance of smooth terms:
##               edf Ref.df      F p-value
## s(age_z)      4.114  4.114 352.036 <2e-16 ***
## s(sleep_z)    1.111  1.111   1.181   0.313
## ---
## Signif. codes:  0 '***' 0.001 '**' 0.01 '*' 0.05 '.' 0.1 ' ' 1
##
## R-sq.(adj) = 0.107
## lmer.REML = 3.7335e+05 Scale est. = 833.42 n = 31173
```

We did the same controlling for BMI. Below is the model with no covariates but only keeping data with BMI.

```
##
## Family: gaussian
## Link function: identity
##
## Formula:
## value ~ sex + site + s(age_z, k = 10, bs = "cr") + s(sleep_z,
##     k = 5, bs = "cr") + icv
## <environment: 0x5589628f4758>
##
## Parametric coefficients:
```

```

##           Estimate Std. Error t value Pr(>|t|)
## (Intercept) 461.1165     9.1717  50.276 < 2e-16 ***
## sexmale     -18.3813     1.4622 -12.571 < 2e-16 ***
## siteousPrisma 43.5868    12.1782   3.579 0.000345 ***
## siteousSkyra  -7.1751     7.0792  -1.014 0.310811
## siteUCAM     36.6438     9.6964   3.779 0.000158 ***
## siteUKB      87.9018     9.2499   9.503 < 2e-16 ***
## siteUmU      53.5881    11.0254   4.860 1.18e-06 ***
## icv          28.7018     0.7529  38.120 < 2e-16 ***
## ---
## Signif. codes:  0 '***' 0.001 '**' 0.01 '*' 0.05 '.' 0.1 ' ' 1
##
## Approximate significance of smooth terms:
##           edf Ref.df      F p-value
## s(age_z)   5.692  5.692 330.447 <2e-16 ***
## s(sleep_z) 1.268  1.268   0.105  0.904
## ---
## Signif. codes:  0 '***' 0.001 '**' 0.01 '*' 0.05 '.' 0.1 ' ' 1
##
## R-sq.(adj) =  0.114
## lmer.REML = 3.9965e+05  Scale est. = 794.26   n = 33417

```

Below is the model output with main effect.

```

##
## Family: gaussian
## Link function: identity
##
## Formula:
## value ~ sex + site + s(age_z, k = 10, bs = "cr") + s(sleep_z,
##           k = 5, bs = "cr") + icv + bmi
## <environment: 0x5589628f4758>
##
## Parametric coefficients:
##           Estimate Std. Error t value Pr(>|t|)
## (Intercept) 499.5209     9.8384  50.773 < 2e-16 ***
## sexmale     -17.1654     1.4640 -11.725 < 2e-16 ***
## siteousPrisma 44.9821    12.1659   3.697 0.000218 ***
## siteousSkyra  -7.0110     7.0776  -0.991 0.321896
## siteUCAM     37.5731     9.6864   3.879 0.000105 ***
## siteUKB      89.0859     9.2410   9.640 < 2e-16 ***
## siteUmU      55.2298    11.0125   5.015 5.33e-07 ***
## icv          28.9227     0.7517  38.476 < 2e-16 ***
## bmi         -1.5230     0.1421 -10.719 < 2e-16 ***
## ---
## Signif. codes:  0 '***' 0.001 '**' 0.01 '*' 0.05 '.' 0.1 ' ' 1
##
## Approximate significance of smooth terms:
##           edf Ref.df      F p-value
## s(age_z)   5.675  5.675 333.2 <2e-16 ***
## s(sleep_z) 1.000  1.000   0.4  0.527
## ---
## Signif. codes:  0 '***' 0.001 '**' 0.01 '*' 0.05 '.' 0.1 ' ' 1
##
## R-sq.(adj) =  0.117

```



```
## lmer.REML = 3.9954e+05 Scale est. = 794.11 n = 33417
```

Next is the model with BMI-sleep interaction.

```
##
## Family: gaussian
## Link function: identity
##
## Formula:
## value ~ sex + site + s(age_z, k = 10, bs = "cr") + s(sleep_z,
##     k = 5, bs = "cr") + icv + bmi + bmi:sleep_z
## <environment: 0x5589628f4758>
##
## Parametric coefficients:
##           Estimate Std. Error t value Pr(>|t|)
## (Intercept)  499.1361     9.8431  50.709 < 2e-16 ***
## sexmale      -17.1584     1.4640 -11.721 < 2e-16 ***
## siteousPrisma  44.9838    12.1658   3.698 0.000218 ***
## siteousSkyra  -6.9758     7.0776  -0.986 0.324329
## siteUCAM      37.7190     9.6870   3.894 9.89e-05 ***
## siteUKB       89.2268     9.2416   9.655 < 2e-16 ***
## siteUmU       55.3608    11.0129   5.027 5.01e-07 ***
## icv           28.9292     0.7517  38.484 < 2e-16 ***
## bmi           -1.5169     0.1422 -10.670 < 2e-16 ***
## bmi:sleep_z    0.1689     0.1345   1.256 0.209213
## ---
## Signif. codes:  0 '***' 0.001 '**' 0.01 '*' 0.05 '.' 0.1 ' ' 1
##
## Approximate significance of smooth terms:
##           edf Ref.df      F p-value
## s(age_z)   5.674  5.674 333.525 <2e-16 ***
## s(sleep_z) 1.000  1.000   1.805  0.179
## ---
## Signif. codes:  0 '***' 0.001 '**' 0.01 '*' 0.05 '.' 0.1 ' ' 1
##
## R-sq.(adj) =  0.117
## lmer.REML = 3.9954e+05 Scale est. = 794.1 n = 33417
```

We did the same controlling for depression. Below is the model with no covariates but only keeping data with depression.

```
##
## Family: gaussian
## Link function: identity
##
## Formula:
## value ~ sex + site + s(age_z, k = 10, bs = "cr") + s(sleep_z,
##     k = 5, bs = "cr") + icv
## <environment: 0x558ada4d57f8>
##
## Parametric coefficients:
##           Estimate Std. Error t value Pr(>|t|)
## (Intercept)  532.8544     6.9724  76.424 < 2e-16 ***
## sexmale      -18.1468     1.4689 -12.354 < 2e-16 ***
## siteousAvanto -54.5723    14.6336  -3.729 0.000192 ***
## siteousPrisma -27.4611    13.2918  -2.066 0.038835 *
```

```

## siteousSkyra -77.5324 10.4213 -7.440 1.03e-13 ***
## siteUCAM -39.7849 9.5266 -4.176 2.97e-05 ***
## siteUKB 15.5185 6.8946 2.251 0.024403 *
## siteUmU -19.9476 9.3871 -2.125 0.033594 *
## icv 28.3413 0.7553 37.522 < 2e-16 ***
## ---
## Signif. codes: 0 '***' 0.001 '**' 0.01 '*' 0.05 '.' 0.1 ' ' 1
##
## Approximate significance of smooth terms:
## edf Ref.df F p-value
## s(age_z) 5.436 5.436 325.992 <2e-16 ***
## s(sleep_z) 1.380 1.380 0.223 0.833
## ---
## Signif. codes: 0 '***' 0.001 '**' 0.01 '*' 0.05 '.' 0.1 ' ' 1
##
## R-sq.(adj) = 0.11
## lmer.REML = 3.9837e+05 Scale est. = 779.46 n = 33329

```

Below is the model output with main effect.

```

##
## Family: gaussian
## Link function: identity
##
## Formula:
## value ~ sex + site + s(age_z, k = 10, bs = "cr") + s(sleep_z,
## k = 5, bs = "cr") + icv + depression
## <environment: 0x558ada4d57f8>
##
## Parametric coefficients:
## Estimate Std. Error t value Pr(>|t|)
## (Intercept) 534.3633 7.0026 76.309 < 2e-16 ***
## sexmale -18.3019 1.4703 -12.448 < 2e-16 ***
## siteousAvanto -53.8246 14.6375 -3.677 0.000236 ***
## siteousPrisma -26.8027 13.2955 -2.016 0.043816 *
## siteousSkyra -76.6840 10.4285 -7.353 1.98e-13 ***
## siteUCAM -39.4575 9.5277 -4.141 3.46e-05 ***
## siteUKB 14.8959 6.8996 2.159 0.030861 *
## siteUmU -15.4031 9.5825 -1.607 0.107973
## icv 28.3640 0.7551 37.561 < 2e-16 ***
## depression -12.2990 5.2109 -2.360 0.018269 *
## ---
## Signif. codes: 0 '***' 0.001 '**' 0.01 '*' 0.05 '.' 0.1 ' ' 1
##
## Approximate significance of smooth terms:
## edf Ref.df F p-value
## s(age_z) 5.457 5.457 324.371 <2e-16 ***
## s(sleep_z) 1.000 1.000 0.195 0.659
## ---
## Signif. codes: 0 '***' 0.001 '**' 0.01 '*' 0.05 '.' 0.1 ' ' 1
##
## R-sq.(adj) = 0.11
## lmer.REML = 3.9836e+05 Scale est. = 779.38 n = 33329

```

Next is the model with depression-sleep interaction.

```

##
## Family: gaussian
## Link function: identity
##
## Formula:
## value ~ sex + site + s(age_z, k = 10, bs = "cr") + s(sleep_z,
##     k = 5, bs = "cr") + icv + depression + depression:sleep_z
## <environment: 0x558ada4d57f8>
##
## Parametric coefficients:
##           Estimate Std. Error t value Pr(>|t|)
## (Intercept)   534.3569     7.0023  76.312 < 2e-16 ***
## sexmale       -18.3507     1.4704 -12.480 < 2e-16 ***
## siteousAvanto -54.1876    14.6370  -3.702 0.000214 ***
## siteousPrisma -27.1496    13.2942  -2.042 0.041138 *
## siteousSkyra  -77.0308    10.4274  -7.387 1.53e-13 ***
## siteUCAM      -39.8012     9.5286  -4.177 2.96e-05 ***
## siteUKB        14.9182     6.8993   2.162 0.030603 *
## siteUmU       -13.0927     9.6604  -1.355 0.175332
## icv            28.3693     0.7551  37.570 < 2e-16 ***
## depression    -12.8423     5.2188  -2.461 0.013869 *
## depression:sleep_z -7.1334     3.8088  -1.873 0.061092 .
## ---
## Signif. codes:  0 '***' 0.001 '**' 0.01 '*' 0.05 '.' 0.1 ' ' 1
##
## Approximate significance of smooth terms:
##           edf Ref.df      F p-value
## s(age_z)   5.427  5.427 326.384 <2e-16 ***
## s(sleep_z) 1.000  1.000   0.397   0.529
## ---
## Signif. codes:  0 '***' 0.001 '**' 0.01 '*' 0.05 '.' 0.1 ' ' 1
##
## R-sq.(adj) =  0.11
## lmer.REML = 3.9835e+05  Scale est. = 779.43    n = 33329

```

The plot below shows the sleep-volume curve for the original model and for the model with main effects of SES.

CC\_Mid\_Posterior sleep effect, covariates

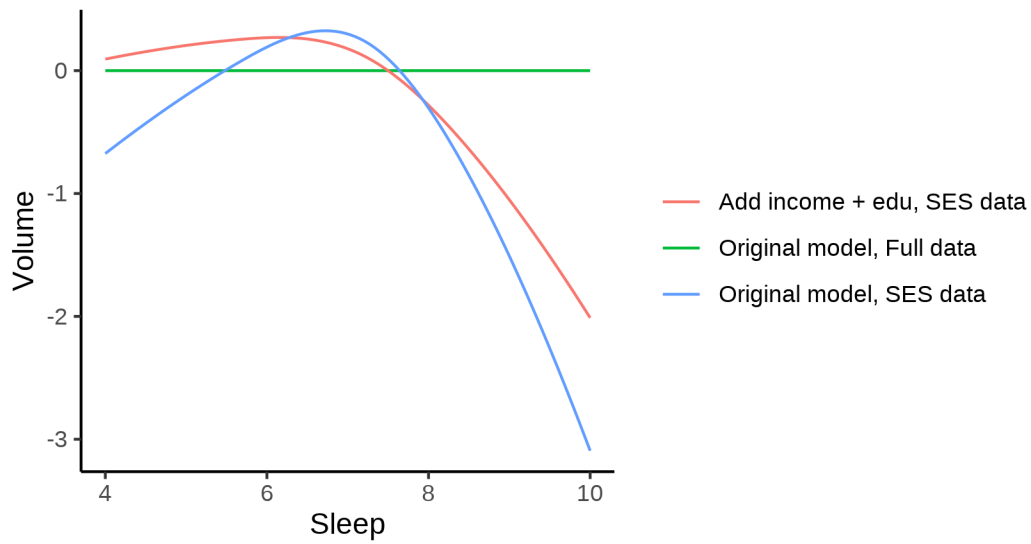

The plot below shows the sleep-volume curve for the original model and for the model with main effects of BMI.

CC\_Mid\_Posterior sleep effect, covariates

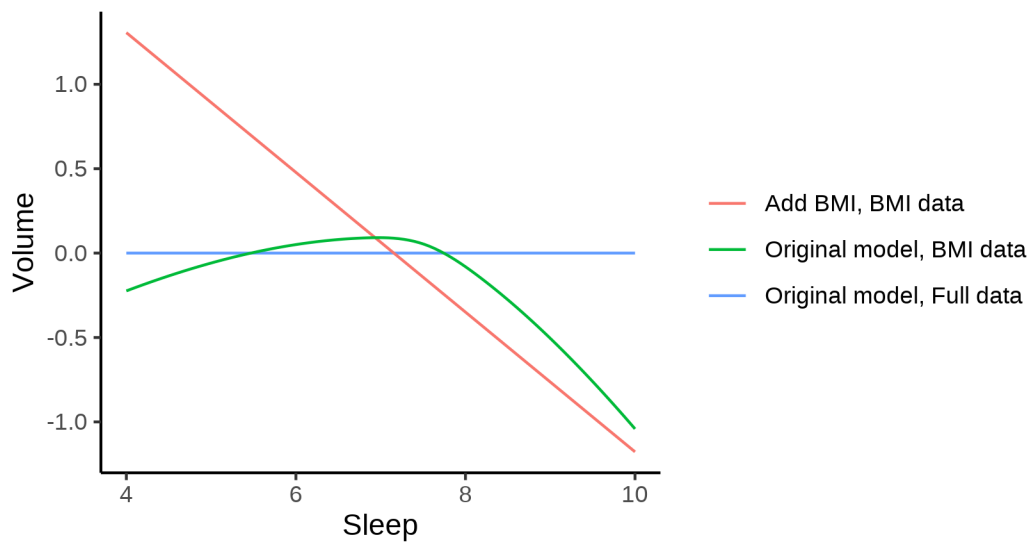

The plot below shows the sleep-volume curve for the original model and for the model with main effects of depression.

## CC\_Mid\_Posterior sleep effect, covariates

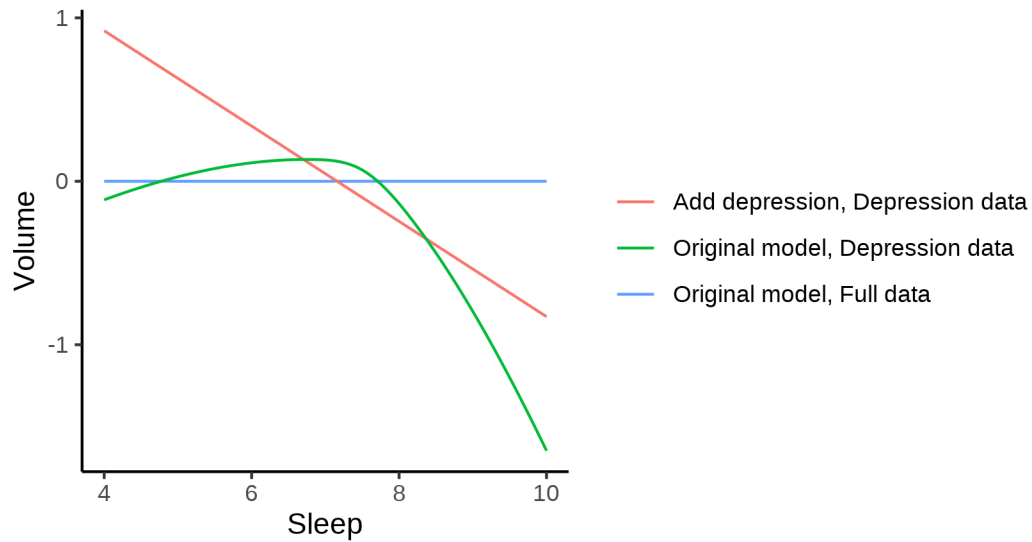

## Models Not controlling for ICV

### Model outputs

Model without sleep term

```
##
## Family: gaussian
## Link function: identity
##
## Formula:
## value ~ sex + site + s(age_z, k = 10, bs = "cr")
## <environment: 0x55896058cc10>
##
## Parametric coefficients:
##              Estimate Std. Error t value Pr(>|t|)
## (Intercept)  510.8419    5.7428  88.953 < 2e-16 ***
## sexmale      12.5381     0.9883  12.687 < 2e-16 ***
## siteMPIB     -28.6913    7.3997  -3.877 0.000106 ***
## siteousAvanto -48.8229    5.9382  -8.222 < 2e-16 ***
## siteousPrisma -14.7692   10.1066  -1.461 0.143928
## siteousSkyra  -74.1954    5.6728 -13.079 < 2e-16 ***
## siteUB       -51.7313   17.6559  -2.930 0.003391 **
## siteUCAM     -27.1617    6.4503  -4.211 2.55e-05 ***
## siteUKB      25.0515     5.8962   4.249 2.15e-05 ***
## siteUmU      -24.4672    8.3543  -2.929 0.003405 **
## siteUOXF     -12.4063    7.0322  -1.764 0.077702 .
## ---
## Signif. codes:  0 '***' 0.001 '**' 0.01 '*' 0.05 '.' 0.1 ' ' 1
##
## Approximate significance of smooth terms:
##              edf Ref.df    F p-value
## s(age_z)    6.054  6.054 551.8 <2e-16 ***
```

```
## ---
## Signif. codes:  0 '***' 0.001 '**' 0.01 '*' 0.05 '.' 0.1 ' ' 1
##
## R-sq.(adj) =  0.0866
## lmer.REML = 6.1483e+05  Scale est. = 751.3      n = 51248
```

Model with only main effects of age and sleep

```
##
## Family: gaussian
## Link function: identity
##
## Formula:
## value ~ sex + site + s(age_z, k = 10, bs = "cr") + s(sleep_z,
##      k = 5, bs = "cr")
## <environment: 0x55896058cc10>
```

```
## Parametric coefficients:
##              Estimate Std. Error t value Pr(>|t|)
## (Intercept)  511.3248    5.7480  88.957 < 2e-16 ***
## sexmale      12.4363     0.9887  12.578 < 2e-16 ***
## siteMPIB     -28.6308     7.4023  -3.868 0.00011 ***
## siteousAvanto -49.2183     5.9396  -8.286 < 2e-16 ***
## siteousPrisma -15.0449    10.1060  -1.489 0.13657
## siteousSkyra  -74.6195     5.6743 -13.151 < 2e-16 ***
## siteUB       -51.3830    17.6531  -2.911 0.00361 **
## siteUCAM     -27.1731     6.4502  -4.213 2.53e-05 ***
## siteUKB       24.5918     5.9013   4.167 3.09e-05 ***
## siteUmU      -24.4957     8.3718  -2.926 0.00344 **
## siteUOXF     -12.6253     7.0314  -1.796 0.07257 .
```

```
## ---
## Signif. codes:  0 '***' 0.001 '**' 0.01 '*' 0.05 '.' 0.1 ' ' 1
##
```

```
## Approximate significance of smooth terms:
##              edf Ref.df      F p-value
## s(age_z)     6.040  6.040 546.542 < 2e-16 ***
## s(sleep_z)   2.884  2.884   3.997 0.00502 **
```

```
## ---
## Signif. codes:  0 '***' 0.001 '**' 0.01 '*' 0.05 '.' 0.1 ' ' 1
##
```

```
## R-sq.(adj) =  0.0869
## lmer.REML = 6.1482e+05  Scale est. = 751.36      n = 51248
```

Model with full interaction between age and sleep

```
##
## Family: gaussian
## Link function: identity
##
## Formula:
## value ~ sex + site + t2(age_z, sleep_z, k = c(10, 4), bs = "cr")
## <environment: 0x55896058cc10>
```

```
## Parametric coefficients:
##              Estimate Std. Error t value Pr(>|t|)
## (Intercept)  511.7166    5.7615  88.816 < 2e-16 ***
```

```

## sexmale      12.5060      0.9906  12.624 < 2e-16 ***
## siteMPIB     -29.4742      7.4345  -3.965 7.36e-05 ***
## siteousAvanto -49.4583      5.9686  -8.286 < 2e-16 ***
## siteousPrisma -15.3773     10.1270  -1.518 0.12891
## siteousSkyra  -74.8122      5.7066 -13.110 < 2e-16 ***
## siteUB       -52.5624     17.6624  -2.976 0.00292 **
## siteUCAM     -27.8409      6.4798  -4.297 1.74e-05 ***
## siteUKB       24.1650      5.9138   4.086 4.39e-05 ***
## siteUmU      -25.2139      8.3918  -3.005 0.00266 **
## siteUOXF     -13.2783      7.0500  -1.883 0.05965 .
## ---
## Signif. codes:  0 '***' 0.001 '**' 0.01 '*' 0.05 '.' 0.1 ' ' 1
##
## Approximate significance of smooth terms:
##              edf Ref.df    F p-value
## t2(age_z,sleep_z) 10.18  10.18 16.98 <2e-16 ***
## ---
## Signif. codes:  0 '***' 0.001 '**' 0.01 '*' 0.05 '.' 0.1 ' ' 1
##
## R-sq.(adj) =  0.0867
## lmer.REML = 6.1483e+05  Scale est. = 751.33    n = 51248

```

## Model comparison

`mod_no_sleep` refers to model without sleep term, `mod_no_interaction` refers to model with only main effect of sleep, and `mod_full` refers to model with a full interaction between age and sleep. This is a nested model comparison, and the p-value at a given line refers to comparing the model at the line to the model on the line above. Hence, significance implies that the more complicated model is supported on statistical grounds.

To be even more specific, the p-value on the second row tests whether there is an association between sleep and volume. The p-value on the third row tests whether this association depends on age.

```

## Data: NULL
## Models:
## ml$mod_no_sleep$mer: NULL
## ml$mod_no_interaction$mer: NULL
## ml$mod_full$mer: NULL
##
##              npar      AIC      BIC  logLik deviance  Chisq Df Pr(>Chisq)
## ml$mod_no_sleep$mer      15 614857 614990 -307414    614827
## ml$mod_no_interaction$mer  17 614853 615004 -307410    614819 8.0653  2    0.01773 *
## ml$mod_full$mer          19 614865 615033 -307413    614827 0.0000  2    1.00000
## ---
## Signif. codes:  0 '***' 0.001 '**' 0.01 '*' 0.05 '.' 0.1 ' ' 1

```

We chose the model based on the likelihood ratio test with 5 % significance level, which was `mod_no_interaction`.

## Lifespan brain trajectory

The trajectory shown is from the chosen model `mod_no_interaction_no_icv`.

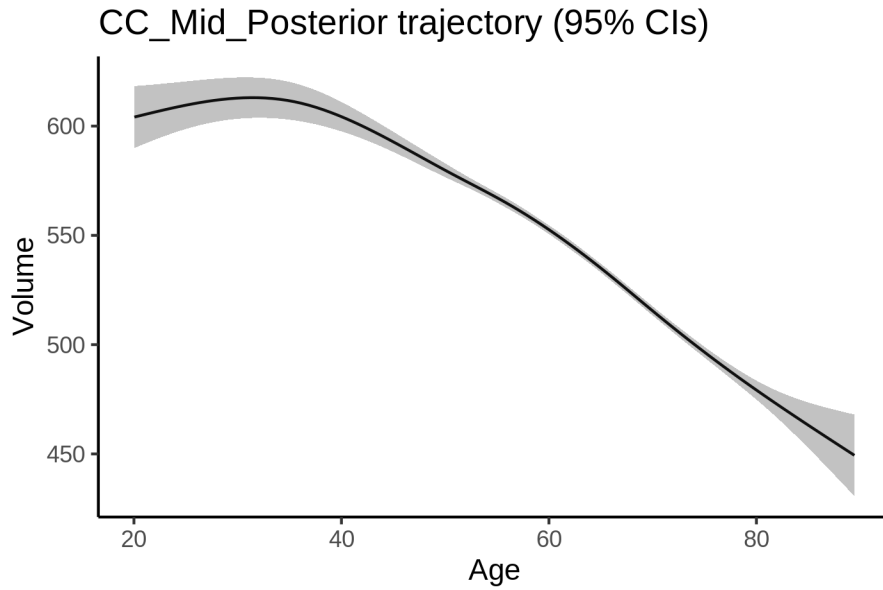

### Effect of sleep

The chosen model only included the main effect of sleep, and hence the effect does not vary with age. The black dot shows the average sleep duration across all ages in the sample.

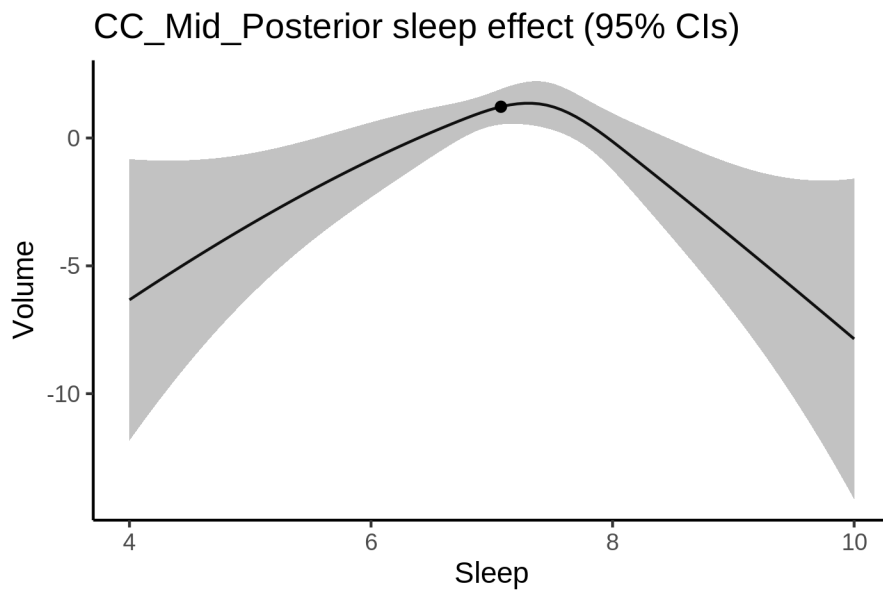

We also show the full interaction model for completeness, although it was not selected.



### CC\_Mid\_Posterior sleep effect (95% CIs)

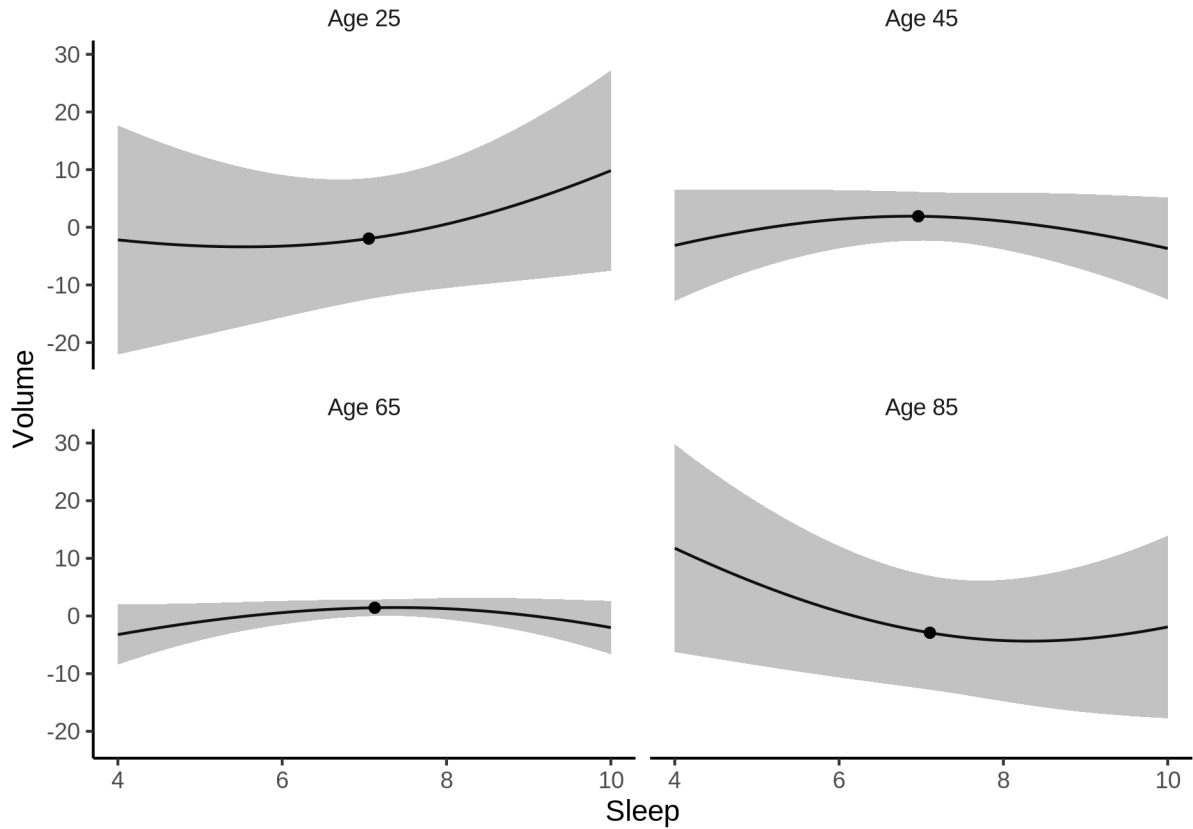

### Deviation from sleep associated with maximal volume

Model with only main effect of sleep was chosen, so we show it for all ages at once. Maximum volume is attained at 7.3 hours of sleep. The percentage values in the plot are calculated as follows: The maximum at 100 % refers to a person at an arbitrary age with a sleep duration associated with maximum volume. For a female, this volume is 553 and for a male it is 565. The other percentage values show how large the expected volume is for someone with other sleep durations. For example, 99 % implies a 1 % reduction.

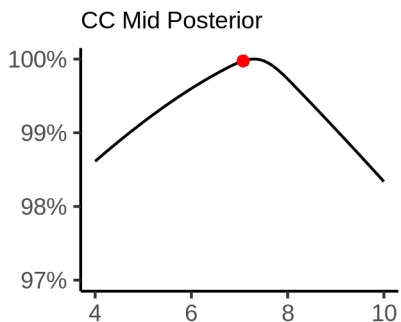

### Comparison of mean sleep and sleep associated with maximum volume

A 95 % confidence interval for the sleep associated with maximum volume is [6.73, 7.58].

The plot below compares average sleep to the sleep associated with maximum volume.

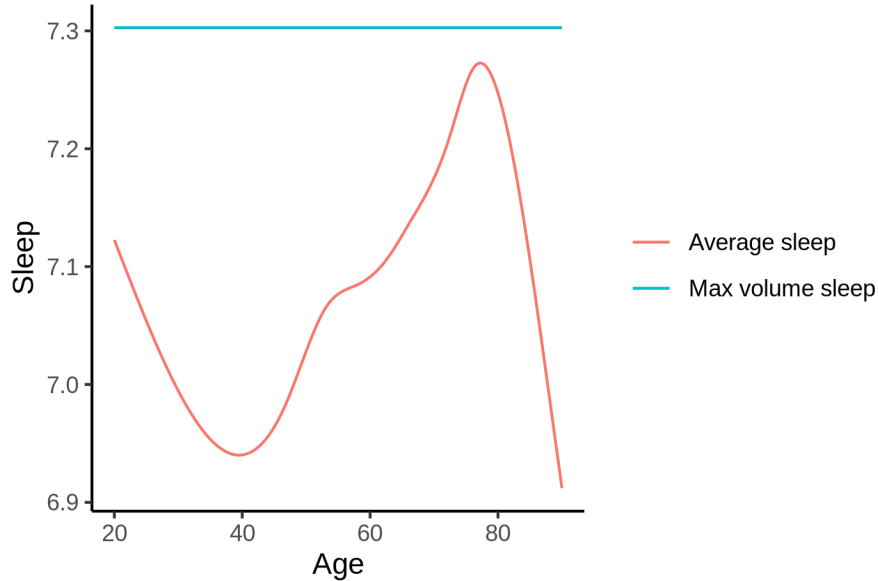

The next plot shows the difference between average sleep and sleep associated with maximum volume. The shaded region is a 95 % confidence interval.

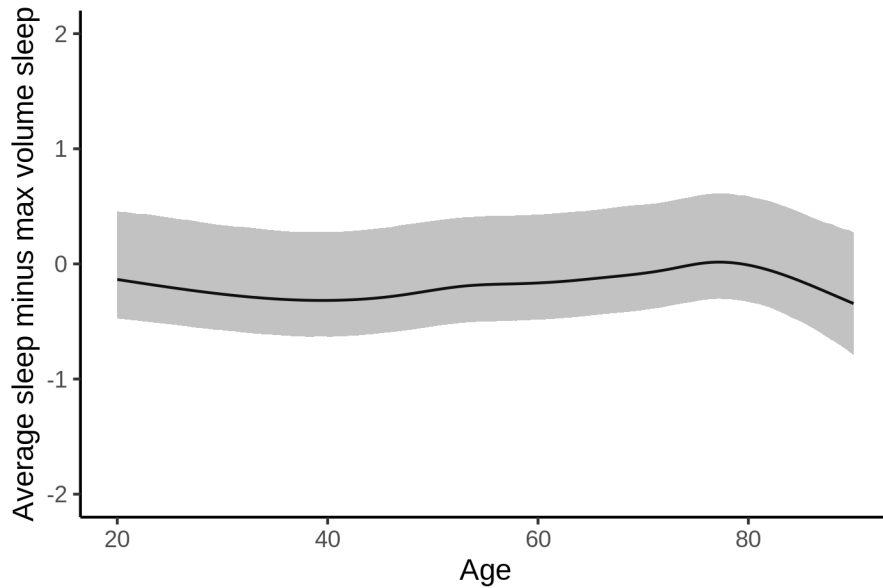

The next plot shows the probability that the sleep duration associated with maximum volume is longer than the average sleep duration, as a function of age. Probability below .05 can be interpreted as evidence that the sleep associated with maximum volume is shorter than the mean sleep, and probability above .95 can be interpreted the opposite way.

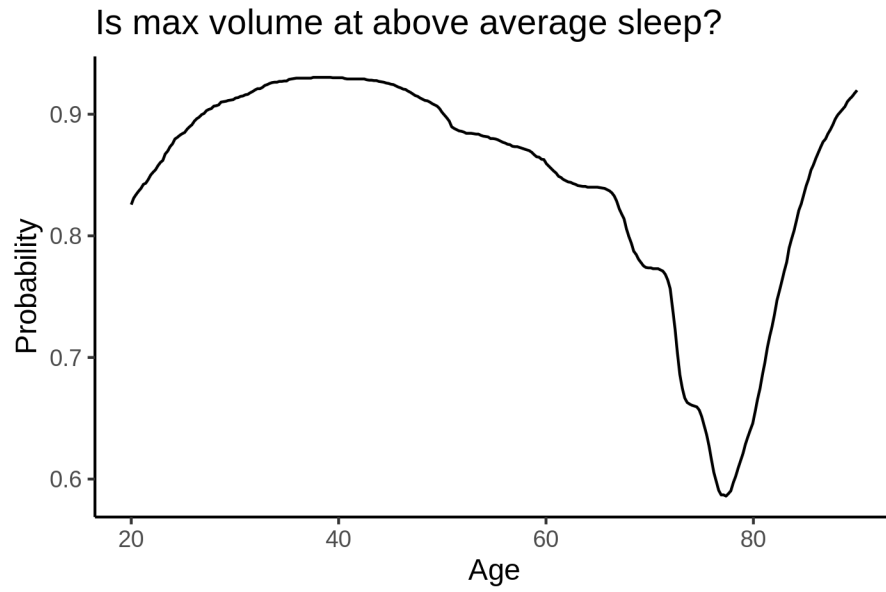

## CC\_Posterior

### Descriptive statistics

| Study | Observations | Unique IDs | Mean age | Age range |
|-------|--------------|------------|----------|-----------|
| HCP   | 974          | 974        | 28.8     | 22 - 37   |
| MPIB  | 675          | 390        | 63.1     | 24 - 83   |
| UB    | 113          | 39         | 70.9     | 64 - 81   |
| UCAM  | 878          | 630        | 54.9     | 20 - 88   |
| UiO   | 1475         | 803        | 49.4     | 20 - 89   |
| UKB   | 45941        | 43118      | 64.5     | 45 - 83   |
| UmU   | 410          | 278        | 62.1     | 25 - 85   |
| UOXF  | 769          | 769        | 69.8     | 60 - 85   |

## Spaghetti plot

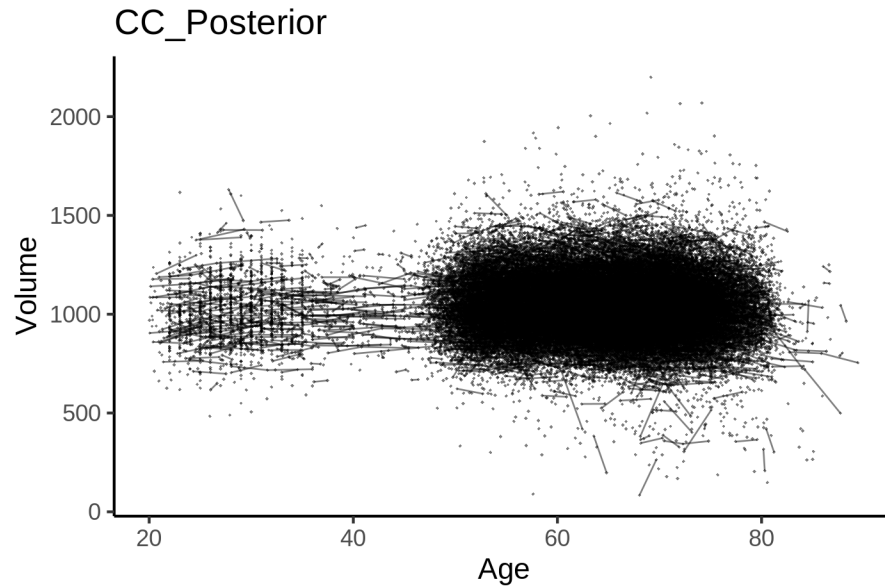

## Models Controlling for ICV

### Model outputs

Model without sleep term

```
##
## Family: gaussian
## Link function: identity
##
## Formula:
## value ~ sex + site + icv + s(age_z, k = 10, bs = "cr")
## <environment: 0x558b286898f0>
##
## Parametric coefficients:
##              Estimate Std. Error t value Pr(>|t|)
## (Intercept)  1048.3383    8.0603  130.062 < 2e-16 ***
## sexmale      -36.5920    1.6835  -21.736 < 2e-16 ***
## siteMPIB      30.6232   10.4580    2.928  0.00341 **
## siteousAvanto -60.0045    8.2038   -7.314 2.63e-13 ***
## siteousPrisma -15.6270   13.7892   -1.133  0.25710
## siteousSkyra  -45.6420    7.9401   -5.748 9.07e-09 ***
## siteUB        -74.7520   24.8480   -3.008  0.00263 **
## siteUCAM      -46.8578    9.0373   -5.185 2.17e-07 ***
## siteUKB        14.3572    8.2599    1.738  0.08218 .
## siteUmU        -3.5300   11.7219   -0.301  0.76330
## siteUOXF      -24.9164    9.8504   -2.529  0.01143 *
## icv            65.5903    0.8447   77.648 < 2e-16 ***
## ---
## Signif. codes:  0 '***' 0.001 '**' 0.01 '*' 0.05 '.' 0.1 ' ' 1
##
```

```

## Approximate significance of smooth terms:
##           edf Ref.df      F p-value
## s(age_z) 7.801  7.801 15.83 <2e-16 ***
## ---
## Signif. codes:  0 '***' 0.001 '**' 0.01 '*' 0.05 '.' 0.1 ' ' 1
##
## R-sq.(adj) =  0.136
## lmer.REML = 6.4791e+05  Scale est. = 1086.4    n = 51235

Model with only main effects of age and sleep

##
## Family: gaussian
## Link function: identity
##
## Formula:
## value ~ sex + site + icv + s(age_z, k = 10, bs = "cr") + s(sleep_z,
##           k = 5, bs = "cr")
## <environment: 0x558b286898f0>
##
## Parametric coefficients:
##           Estimate Std. Error t value Pr(>|t|)
## (Intercept) 1048.9325     8.0678 130.014 < 2e-16 ***
## sexmale      -36.5947     1.6834 -21.738 < 2e-16 ***
## siteMPIB      30.5104    10.4635   2.916  0.00355 **
## siteousAvanto -60.4692     8.2059  -7.369 1.74e-13 ***
## siteousPrisma -15.9644    13.7887  -1.158  0.24695
## siteousSkyra  -46.1880     7.9426  -5.815 6.09e-09 ***
## siteUB        -74.3108    24.8449  -2.991  0.00278 **
## siteUCAM      -46.8673     9.0378  -5.186 2.16e-07 ***
## siteUKB       13.7316     8.2683   1.661  0.09677 .
## siteUmU       -3.6474    11.7474  -0.310  0.75619
## siteUOXF      -25.2247     9.8507  -2.561  0.01045 *
## icv           65.4813     0.8455  77.444 < 2e-16 ***
## ---
## Signif. codes:  0 '***' 0.001 '**' 0.01 '*' 0.05 '.' 0.1 ' ' 1
##
## Approximate significance of smooth terms:
##           edf Ref.df      F p-value
## s(age_z)   7.795  7.795 15.522 <2e-16 ***
## s(sleep_z) 2.963  2.963  3.414  0.012 *
## ---
## Signif. codes:  0 '***' 0.001 '**' 0.01 '*' 0.05 '.' 0.1 ' ' 1
##
## R-sq.(adj) =  0.137
## lmer.REML = 6.4791e+05  Scale est. = 1086.5    n = 51235

Model with full interaction between age and sleep

##
## Family: gaussian
## Link function: identity
##
## Formula:
## value ~ sex + site + icv + t2(age_z, sleep_z, k = c(10, 4), bs = "cr")
## <environment: 0x558b286898f0>

```

```

##
## Parametric coefficients:
##           Estimate Std. Error t value Pr(>|t|)
## (Intercept) 1048.9628    8.0118 130.927 < 2e-16 ***
## sexmale     -36.5993    1.6870 -21.694 < 2e-16 ***
## siteMPIB     30.3028   10.4702  2.894  0.00380 **
## siteousAvanto -60.5644    8.2250 -7.363 1.82e-13 ***
## siteousPrisma -16.3177   13.8157 -1.181  0.23757
## siteousSkyra -46.2002    7.9641 -5.801 6.63e-09 ***
## siteUB       -74.9726   24.8321 -3.019  0.00254 **
## siteUCAM     -47.2130    9.0399 -5.223 1.77e-07 ***
## siteUKB       13.7117    8.2060  1.671  0.09474 .
## siteUmU      -3.9105   11.7289 -0.333  0.73883
## siteUOXF     -25.4776    9.8144 -2.596  0.00944 **
## icv          65.5199    0.8452 77.519 < 2e-16 ***
## ---
## Signif. codes:  0 '***' 0.001 '**' 0.01 '*' 0.05 '.' 0.1 ' ' 1
##
## Approximate significance of smooth terms:
##           edf Ref.df   F p-value
## t2(age_z,sleep_z) 12.85 12.85 9.24 <2e-16 ***
## ---
## Signif. codes:  0 '***' 0.001 '**' 0.01 '*' 0.05 '.' 0.1 ' ' 1
##
## R-sq.(adj) =  0.137
## lmer.REML = 6.4791e+05  Scale est. = 1086      n = 51235

```

## Model comparison

mod\_no\_sleep refers to model without sleep term, mod\_no\_interaction refers to model with only main effect of sleep, and mod\_full refers to model with a full interaction between age and sleep. This is a nested model comparison, and the p-value at a given line refers to comparing the model at the line to the model on the line above. Hence, significance implies that the more complicated model is supported on statistical grounds.

To be even more specific, the p-value on the second row tests whether there is an association between sleep and volume. The p-value on the third row tests whether this association depends on age.

```

## Data: NULL
## Models:
## ml$mod_no_sleep$mer: NULL
## ml$mod_no_interaction$mer: NULL
## ml$mod_full$mer: NULL
##           npar      AIC      BIC logLik deviance Chisq Df Pr(>Chisq)
## ml$mod_no_sleep$mer      16 647946 648087 -323957  647914
## ml$mod_no_interaction$mer  18 647944 648103 -323954  647908 6.1148  2  0.04701 *
## ml$mod_full$mer          20 647953 648129 -323956  647913 0.0000  2  1.00000
## ---
## Signif. codes:  0 '***' 0.001 '**' 0.01 '*' 0.05 '.' 0.1 ' ' 1

```

We chose the model based on the likelihood ratio test with 5 % significance level, which was mod\_no\_interaction.

### Lifespan brain trajectory

The trajectory shown is from the chosen model `mod_no_interaction`.

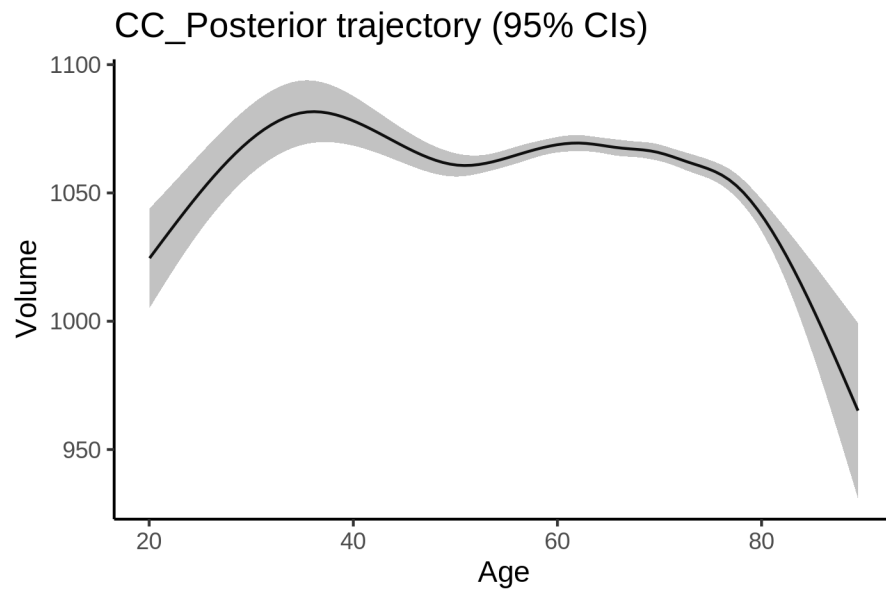

### Effect of sleep

The chosen model only included the main effect of sleep, and hence the effect does not vary with age. The black dot shows the average sleep duration across all ages in the sample.

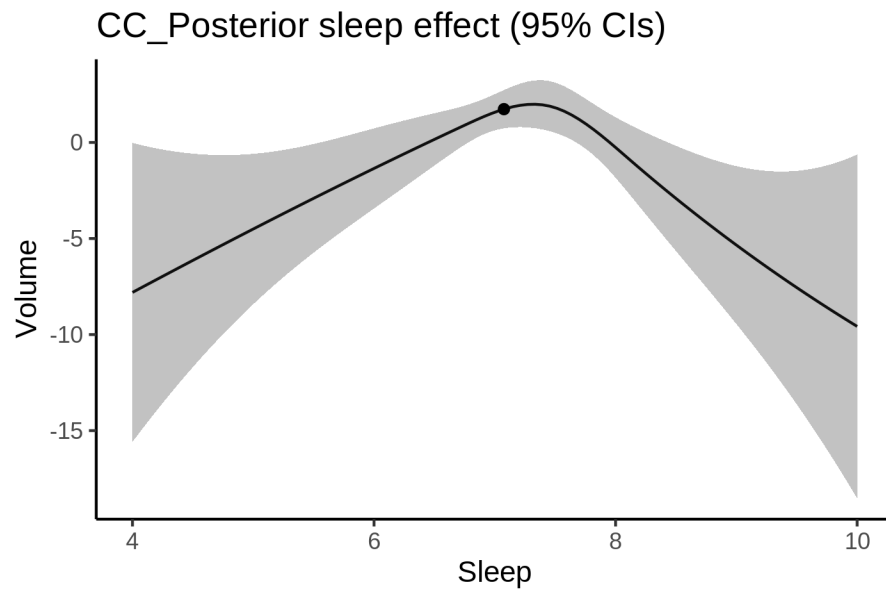

We also show the full interaction model for completeness, although it was not selected.

### CC\_Posterior sleep effect (95% CIs)

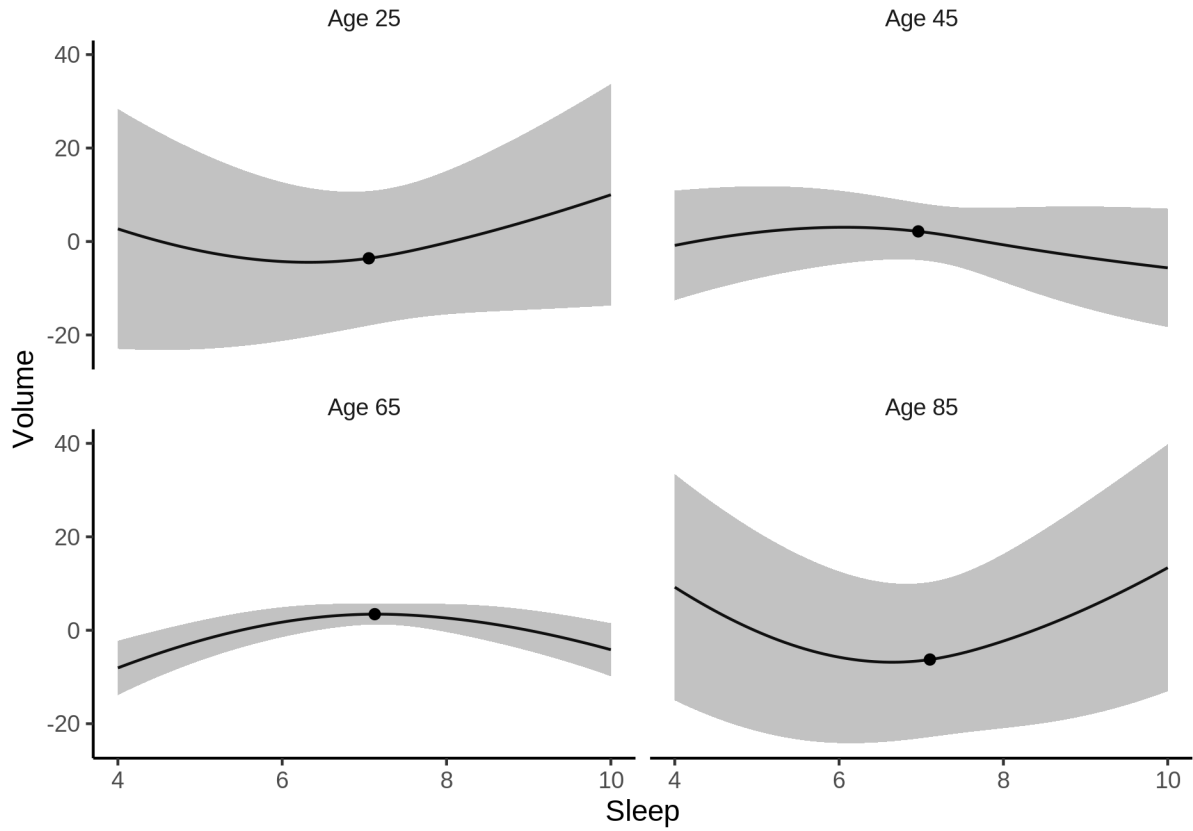

### Deviation from sleep associated with maximal volume

Model with only main effect of sleep was chosen, so we show it for all ages at once. Maximum volume is attained at 7.3 hours of sleep. The percentage values in the plot are calculated as follows: The maximum at 100 % refers to a person at an arbitrary age with a sleep duration associated with maximum volume. For a female, this volume is 1055 and for a male it is 1018. The other percentage values show how large the expected volume is for someone with other sleep durations. For example, 99 % implies a 1 % reduction.

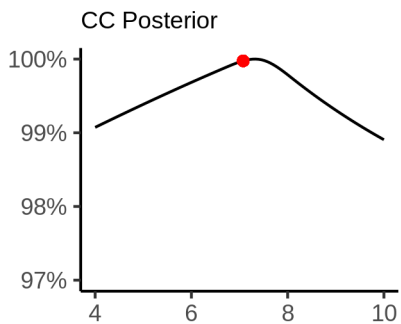



### Comparison of mean sleep and sleep associated with maximum volume

A 95 % confidence interval for the sleep associated with maximum volume is [6.79, 7.58].

The plot below compares average sleep to the sleep associated with maximum volume.

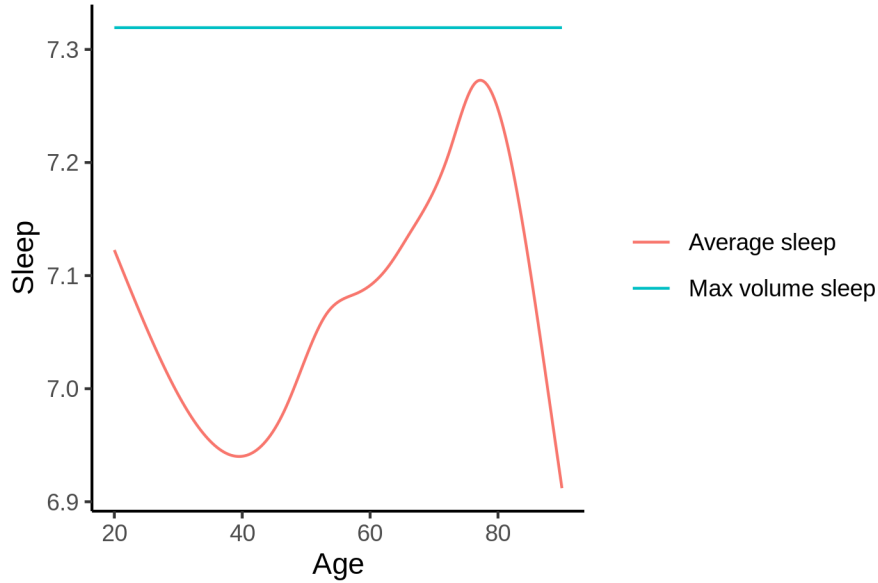

The next plot shows the difference between average sleep and sleep associated with maximum volume. The shaded region is a 95 % confidence interval.

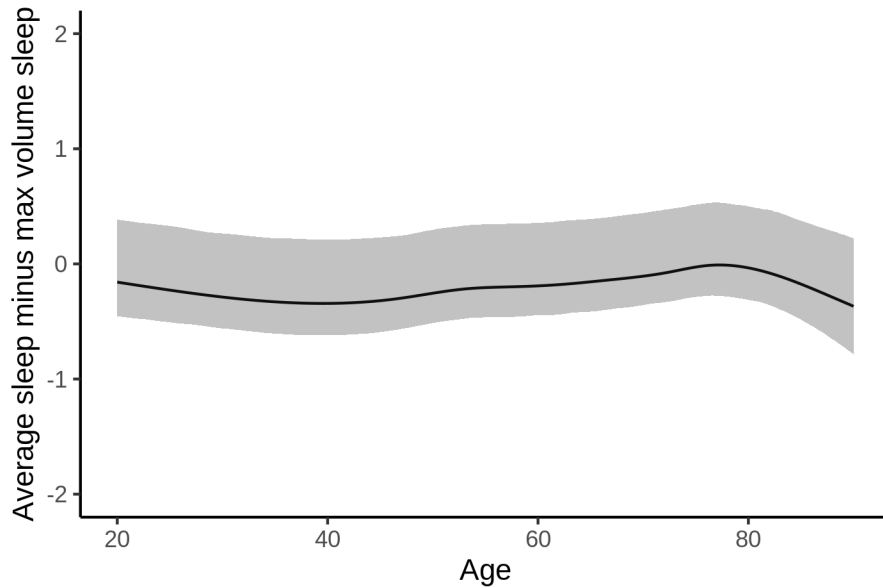

The next plot shows the probability that the sleep duration associated with maximum volume is longer than the average sleep duration, as a function of age. Probability below .05 can be interpreted as evidence that the sleep associated with maximum volume is shorter than the mean sleep, and probability above .95 can be interpreted the opposite way.

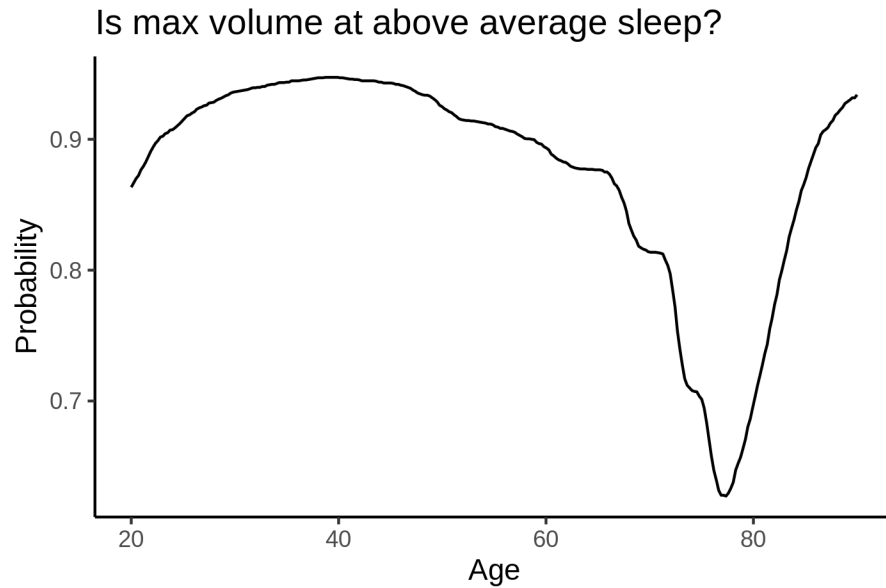

## Controlling for covariates

Below is the output for a model in which we only include data with income and education.

```
##
## Family: gaussian
## Link function: identity
##
## Formula:
## value ~ sex + site + s(age_z, k = 10, bs = "cr") + s(sleep_z,
##   k = 5, bs = "cr") + icv
## <environment: 0x558a479b9b88>
##
## Parametric coefficients:
##               Estimate Std. Error t value Pr(>|t|)
## (Intercept)  1114.752    19.322   57.693 < 2e-16 ***
## sexmale      -40.777     2.130  -19.148 < 2e-16 ***
## siteousAvanto -122.154    22.688   -5.384 7.33e-08 ***
## siteousPrisma -57.543    23.653   -2.433 0.01499 *
## siteousSkyra -102.897    20.993   -4.901 9.56e-07 ***
## siteUKB      -49.960    19.279   -2.591 0.00956 **
## siteUOXF     -71.296    21.715   -3.283 0.00103 **
## icv          69.072     1.092   63.253 < 2e-16 ***
## ---
## Signif. codes:  0 '***' 0.001 '**' 0.01 '*' 0.05 '.' 0.1 ' ' 1
##
## Approximate significance of smooth terms:
##               edf Ref.df    F  p-value
## s(age_z)      4.507  4.507 4.923 0.000424 ***
## s(sleep_z)    2.472  2.472 2.181 0.210884
## ---
## Signif. codes:  0 '***' 0.001 '**' 0.01 '*' 0.05 '.' 0.1 ' ' 1
##
```

```
## R-sq.(adj) = 0.137
## lmer.REML = 3.9407e+05 Scale est. = 1199.7 n = 31165
```

Below is the output for a model in which we control for the main effects of income and education.

```
##
## Family: gaussian
## Link function: identity
##
## Formula:
## value ~ sex + site + s(age_z, k = 10, bs = "cr") + s(sleep_z,
##     k = 5, bs = "cr") + icv + income_scaled + education_scaled
## <environment: 0x558a479b9b88>
##
## Parametric coefficients:
##           Estimate Std. Error t value Pr(>|t|)
## (Intercept)  1109.680    19.443  57.072 < 2e-16 ***
## sexmale      -40.670     2.135 -19.045 < 2e-16 ***
## siteousAvanto -122.396    22.694  -5.393 6.97e-08 ***
## siteousPrisma -58.053    23.653  -2.454 0.01412 *
## siteousSkyra  -103.217    20.998  -4.916 8.90e-07 ***
## siteUKB      -50.363    19.289  -2.611 0.00903 **
## siteUOXF     -69.901    21.726  -3.217 0.00129 **
## icv          68.758     1.101  62.444 < 2e-16 ***
## income_scaled  2.012     2.536  0.793 0.42756
## education_scaled 5.734     3.001  1.910 0.05611 .
## ---
## Signif. codes:  0 '***' 0.001 '**' 0.01 '*' 0.05 '.' 0.1 ' ' 1
##
## Approximate significance of smooth terms:
##           edf Ref.df    F p-value
## s(age_z)   4.531  4.531 4.798 0.000527 ***
## s(sleep_z) 2.338  2.338 1.803 0.272692
## ---
## Signif. codes:  0 '***' 0.001 '**' 0.01 '*' 0.05 '.' 0.1 ' ' 1
##
## R-sq.(adj) = 0.137
## lmer.REML = 3.9406e+05 Scale est. = 1200.2 n = 31165
```

We also included interaction effects between sleep duration and education and income, in another model. The output is shown below, and the interaction terms are `income_scaled:sleep_z` and `education_scaled:sleep_z`.

```
##
## Family: gaussian
## Link function: identity
##
## Formula:
## value ~ sex + site + s(age_z, k = 10, bs = "cr") + s(sleep_z,
##     k = 5, bs = "cr") + icv + income_scaled + education_scaled +
##     income_scaled:sleep_z + education_scaled:sleep_z
## <environment: 0x558a479b9b88>
##
## Parametric coefficients:
##           Estimate Std. Error t value Pr(>|t|)
## (Intercept)  1109.517    19.445  57.061 < 2e-16 ***
```

```

## sexmale          -40.602      2.137 -19.000 < 2e-16 ***
## siteousAvanto    -122.209     22.695  -5.385 7.30e-08 ***
## siteousPrisma    -57.703     23.656  -2.439 0.01472 *
## siteousSkyra     -103.036     20.999  -4.907 9.31e-07 ***
## siteUKB          -50.177     19.291  -2.601 0.00930 **
## siteUOXF         -69.637     21.732  -3.204 0.00135 **
## icv              68.744      1.101  62.424 < 2e-16 ***
## income_scaled    1.951       2.537   0.769 0.44200
## education_scaled 5.789       3.002   1.928 0.05383 .
## income_scaled:sleep_z 1.514     2.524   0.600 0.54853
## education_scaled:sleep_z -2.824     2.912  -0.970 0.33212
## ---
## Signif. codes:  0 '***' 0.001 '**' 0.01 '*' 0.05 '.' 0.1 ' ' 1
##
## Approximate significance of smooth terms:
##          edf Ref.df      F p-value
## s(age_z)  4.525  4.525 4.805 0.000522 ***
## s(sleep_z) 2.291  2.291 1.540 0.336917
## ---
## Signif. codes:  0 '***' 0.001 '**' 0.01 '*' 0.05 '.' 0.1 ' ' 1
##
## R-sq.(adj) =  0.137
## lmer.REML = 3.9405e+05  Scale est. = 1200.2    n = 31165

```

We did the same controlling for BMI. Below is the model with no covariates but only keeping data with BMI.

```

##
## Family: gaussian
## Link function: identity
##
## Formula:
## value ~ sex + site + s(age_z, k = 10, bs = "cr") + s(sleep_z,
##           k = 5, bs = "cr") + icv
## <environment: 0x558a47515c08>
##
## Parametric coefficients:
##              Estimate Std. Error t value Pr(>|t|)
## (Intercept) 1002.627    11.906  84.212 < 2e-16 ***
## sexmale     -40.157     2.071 -19.387 < 2e-16 ***
## siteousPrisma 39.256    15.946   2.462 0.013831 *
## siteousSkyra 12.311     8.494   1.449 0.147250
## siteUCAM      8.305    12.733   0.652 0.514224
## siteUKB       61.749    12.024   5.136 2.83e-07 ***
## siteUmU       50.288    14.757   3.408 0.000656 ***
## icv          68.994     1.066  64.752 < 2e-16 ***
## ---
## Signif. codes:  0 '***' 0.001 '**' 0.01 '*' 0.05 '.' 0.1 ' ' 1
##
## Approximate significance of smooth terms:
##          edf Ref.df      F p-value
## s(age_z)  5.757  5.757 7.042 1.76e-06 ***
## s(sleep_z) 2.479  2.479 0.964  0.245
## ---
## Signif. codes:  0 '***' 0.001 '**' 0.01 '*' 0.05 '.' 0.1 ' ' 1
##

```

```
## R-sq.(adj) = 0.138
## lmer.REML = 4.2184e+05 Scale est. = 1119.3 n = 33403
```

Below is the model output with main effect.

```
##
## Family: gaussian
## Link function: identity
##
## Formula:
## value ~ sex + site + s(age_z, k = 10, bs = "cr") + s(sleep_z,
## k = 5, bs = "cr") + icv + bmi
## <environment: 0x558a47515c08>
##
## Parametric coefficients:
## Estimate Std. Error t value Pr(>|t|)
## (Intercept) 1044.4243 12.9385 80.722 < 2e-16 ***
## sexmale -38.8309 2.0755 -18.709 < 2e-16 ***
## siteousPrisma 40.5813 15.9372 2.546 0.010891 *
## siteousSkyra 12.4462 8.4928 1.466 0.142792
## siteUCAM 9.1993 12.7237 0.723 0.469682
## siteUKB 63.1285 12.0158 5.254 1.5e-07 ***
## siteUmU 51.9688 14.7458 3.524 0.000425 ***
## icv 69.2610 1.0646 65.057 < 2e-16 ***
## bmi -1.6607 0.2018 -8.229 < 2e-16 ***
## ---
## Signif. codes: 0 '***' 0.001 '**' 0.01 '*' 0.05 '.' 0.1 ' ' 1
##
## Approximate significance of smooth terms:
## edf Ref.df F p-value
## s(age_z) 5.737 5.737 7.605 1.29e-06 ***
## s(sleep_z) 1.915 1.915 0.908 0.462
## ---
## Signif. codes: 0 '***' 0.001 '**' 0.01 '*' 0.05 '.' 0.1 ' ' 1
##
## R-sq.(adj) = 0.14
## lmer.REML = 4.2178e+05 Scale est. = 1119.1 n = 33403
```

Next is the model with BMI-sleep interaction.

```
##
## Family: gaussian
## Link function: identity
##
## Formula:
## value ~ sex + site + s(age_z, k = 10, bs = "cr") + s(sleep_z,
## k = 5, bs = "cr") + icv + bmi + bmi:sleep_z
## <environment: 0x558a47515c08>
##
## Parametric coefficients:
## Estimate Std. Error t value Pr(>|t|)
## (Intercept) 1044.6736 12.9457 80.696 < 2e-16 ***
## sexmale -38.8353 2.0755 -18.711 < 2e-16 ***
## siteousPrisma 40.5812 15.9373 2.546 0.010892 *
## siteousSkyra 12.4293 8.4929 1.463 0.143340
## siteUCAM 9.1094 12.7248 0.716 0.474073
```

```

## siteUKB          63.0475    12.0171    5.246 1.56e-07 ***
## siteUmU          51.8878    14.7468    3.519 0.000434 ***
## icv              69.2568     1.0647   65.051 < 2e-16 ***
## bmi              -1.6650     0.2019   -8.246 < 2e-16 ***
## bmi:sleep_z     -0.1132     0.1912   -0.592 0.553960
## ---
## Signif. codes:  0 '***' 0.001 '**' 0.01 '*' 0.05 '.' 0.1 ' ' 1
##
## Approximate significance of smooth terms:
##           edf Ref.df    F  p-value
## s(age_z)  5.741  5.741 7.620 1.28e-06 ***
## s(sleep_z) 1.895  1.895 0.571   0.498
## ---
## Signif. codes:  0 '***' 0.001 '**' 0.01 '*' 0.05 '.' 0.1 ' ' 1
##
## R-sq.(adj) =  0.14
## lmer.REML = 4.2178e+05  Scale est. = 1119.1    n = 33403

```

We did the same controlling for depression. Below is the model with no covariates but only keeping data with depression.

```

##
## Family: gaussian
## Link function: identity
##
## Formula:
## value ~ sex + site + s(age_z, k = 10, bs = "cr") + s(sleep_z,
##           k = 5, bs = "cr") + icv
## <environment: 0x5589612f93b0>
##
## Parametric coefficients:
##           Estimate Std. Error t value Pr(>|t|)
## (Intercept) 1058.208     9.954 106.307 < 2e-16 ***
## sexmale     -39.585     2.081 -19.018 < 2e-16 ***
## siteousAvanto -59.567    19.233  -3.097 0.00196 **
## siteousPrisma  -7.392    18.560  -0.398 0.69044
## siteousSkyra  -35.425    14.706  -2.409 0.01601 *
## siteUCAM     -46.055    13.587  -3.390 0.00070 ***
## siteUKB       5.983     9.845   0.608 0.54342
## siteUmU      -7.158    13.386  -0.535 0.59283
## icv          68.573     1.069  64.143 < 2e-16 ***
## ---
## Signif. codes:  0 '***' 0.001 '**' 0.01 '*' 0.05 '.' 0.1 ' ' 1
##
## Approximate significance of smooth terms:
##           edf Ref.df    F  p-value
## s(age_z)  5.606  5.606 6.027 4.32e-05 ***
## s(sleep_z) 2.590  2.590 2.564   0.178
## ---
## Signif. codes:  0 '***' 0.001 '**' 0.01 '*' 0.05 '.' 0.1 ' ' 1
##
## R-sq.(adj) =  0.138
## lmer.REML = 4.2042e+05  Scale est. = 1085      n = 33313

```

Below is the model output with main effect.

```

##
## Family: gaussian
## Link function: identity
##
## Formula:
## value ~ sex + site + s(age_z, k = 10, bs = "cr") + s(sleep_z,
##     k = 5, bs = "cr") + icv + depression
## <environment: 0x5589612f93b0>
##
## Parametric coefficients:
##           Estimate Std. Error t value Pr(>|t|)
## (Intercept) 1058.897      9.997 105.923 < 2e-16 ***
## sexmale      -39.657       2.084 -19.033 < 2e-16 ***
## siteousAvanto -59.194      19.237  -3.077 0.002092 **
## siteousPrisma  -7.056      18.564  -0.380 0.703870
## siteousSkyra  -35.010      14.714  -2.379 0.017347 *
## siteUCAM      -45.886      13.588  -3.377 0.000734 ***
## siteUKB        5.701       9.853   0.579 0.562834
## siteUmU       -5.055      13.667  -0.370 0.711477
## icv           68.584       1.069  64.150 < 2e-16 ***
## depression    -5.659       7.446  -0.760 0.447267
## ---
## Signif. codes:  0 '***' 0.001 '**' 0.01 '*' 0.05 '.' 0.1 ' ' 1
##
## Approximate significance of smooth terms:
##           edf Ref.df      F p-value
## s(age_z)   5.595  5.595 5.997 4.64e-05 ***
## s(sleep_z) 2.522  2.522 2.323  0.212
## ---
## Signif. codes:  0 '***' 0.001 '**' 0.01 '*' 0.05 '.' 0.1 ' ' 1
##
## R-sq.(adj) =  0.138
## lmer.REML = 4.2041e+05  Scale est. = 1084.9    n = 33313

```

Next is the model with depression-sleep interaction.

```

##
## Family: gaussian
## Link function: identity
##
## Formula:
## value ~ sex + site + s(age_z, k = 10, bs = "cr") + s(sleep_z,
##     k = 5, bs = "cr") + icv + depression + depression:sleep_z
## <environment: 0x5589612f93b0>
##
## Parametric coefficients:
##           Estimate Std. Error t value Pr(>|t|)
## (Intercept) 1058.892      9.997 105.922 < 2e-16 ***
## sexmale      -39.696       2.084 -19.049 < 2e-16 ***
## siteousAvanto -59.419      19.237  -3.089 0.002012 **
## siteousPrisma  -7.285      18.564  -0.392 0.694748
## siteousSkyra  -35.225      14.714  -2.394 0.016674 *
## siteUCAM      -46.139      13.590  -3.395 0.000687 ***
## siteUKB        5.725       9.853   0.581 0.561220
## siteUmU       -3.261      13.784  -0.237 0.812990

```

```

## icv                68.589      1.069  64.154 < 2e-16 ***
## depression         -6.168      7.458  -0.827 0.408219
## depression:sleep_z -5.388      5.480  -0.983 0.325536
## ---
## Signif. codes:  0 '***' 0.001 '**' 0.01 '*' 0.05 '.' 0.1 ' ' 1
##
## Approximate significance of smooth terms:
##          edf Ref.df   F  p-value
## s(age_z)  5.577  5.577 5.975 4.86e-05 ***
## s(sleep_z) 2.442  2.442 2.105  0.235
## ---
## Signif. codes:  0 '***' 0.001 '**' 0.01 '*' 0.05 '.' 0.1 ' ' 1
##
## R-sq.(adj) =  0.138
## lmer.REML = 4.2041e+05  Scale est. = 1084.9    n = 33313

```

The plot below shows the sleep-volume curve for the original model and for the model with main effects of SES.

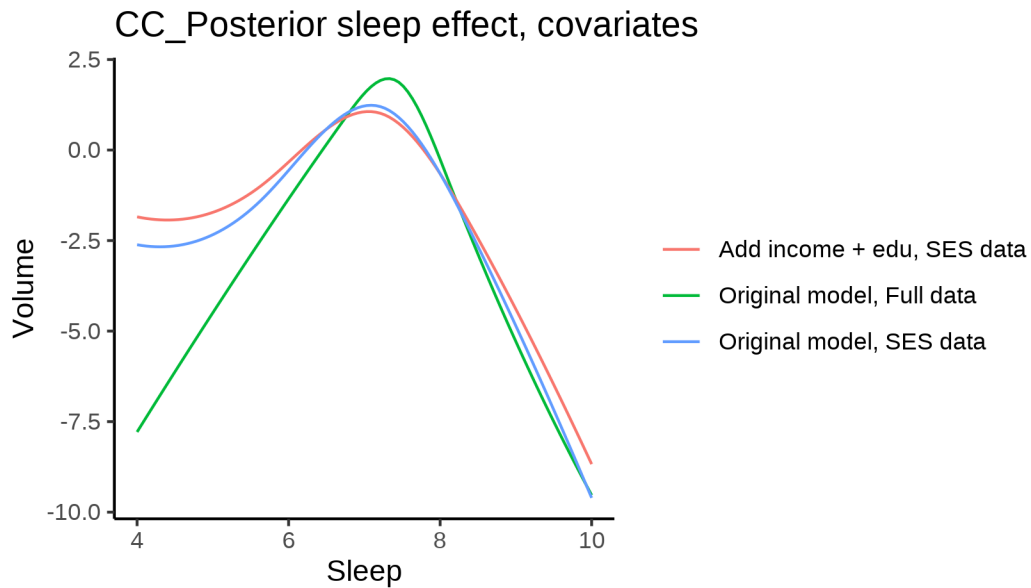

The plot below shows the sleep-volume curve for the original model and for the model with main effects of BMI.



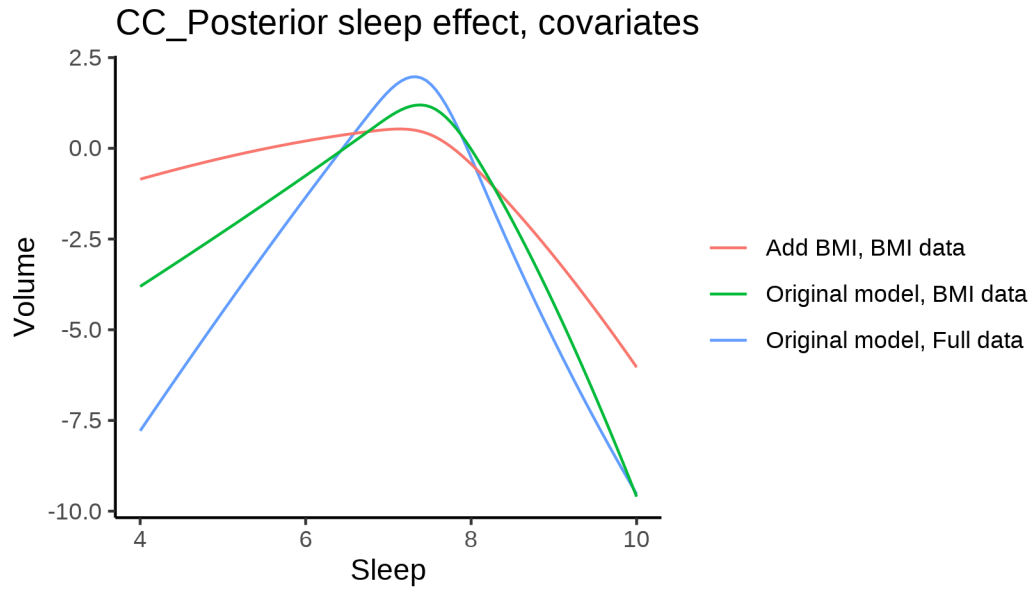

The plot below shows the sleep-volume curve for the original model and for the model with main effects of depression.

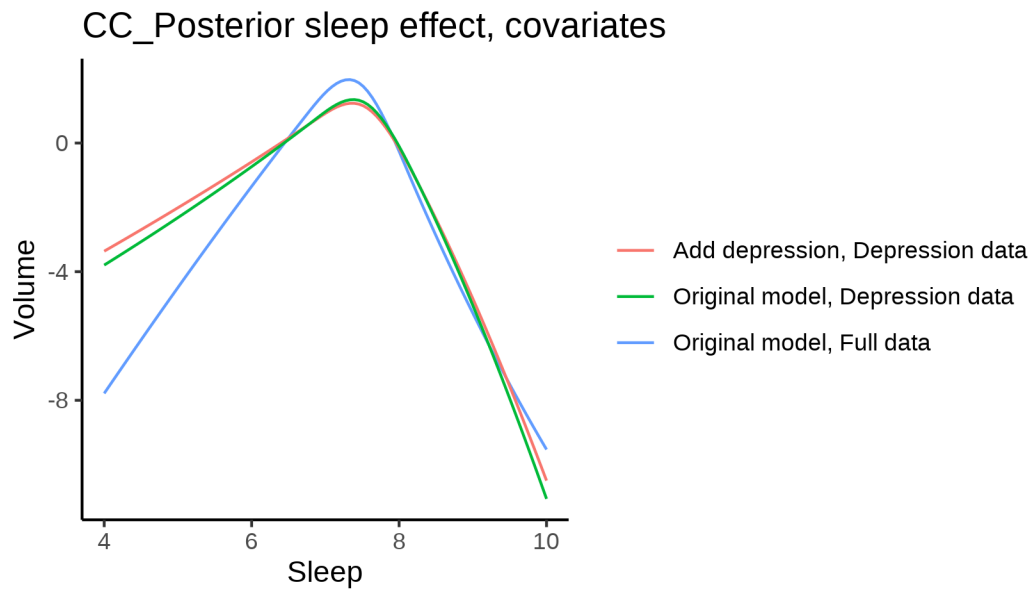

## Models Not controlling for ICV

### Model outputs

Model without sleep term

```
##
## Family: gaussian
## Link function: identity
##
## Formula:
```

```

## value ~ sex + site + s(age_z, k = 10, bs = "cr")
## <environment: 0x558a4a807388>
##
## Parametric coefficients:
##           Estimate Std. Error t value Pr(>|t|)
## (Intercept) 1011.603      8.423 120.093 < 2e-16 ***
## sexmale      37.846       1.469  25.771 < 2e-16 ***
## siteMPIB     -74.095     10.956  -6.763 1.37e-11 ***
## siteousAvanto -32.067      8.627  -3.717 0.000202 ***
## siteousPrisma  2.810     14.487   0.194 0.846216
## siteousSkyra -41.430      8.384  -4.941 7.78e-07 ***
## siteUB       -93.371     26.359  -3.542 0.000397 ***
## siteUCAM     -43.281      9.533  -4.540 5.64e-06 ***
## siteUKB       17.051      8.645   1.972 0.048564 *
## siteUmU      -29.790     12.373  -2.408 0.016062 *
## siteUOXF     -39.489     10.353  -3.814 0.000137 ***
## ---
## Signif. codes:  0 '***' 0.001 '**' 0.01 '*' 0.05 '.' 0.1 ' ' 1
##
## Approximate significance of smooth terms:
##           edf Ref.df      F p-value
## s(age_z) 7.016  7.016 22.77 <2e-16 ***
## ---
## Signif. codes:  0 '***' 0.001 '**' 0.01 '*' 0.05 '.' 0.1 ' ' 1
##
## R-sq.(adj) = 0.0279
## lmer.REML = 6.536e+05 Scale est. = 1114.8    n = 51235

Model with only main effects of age and sleep

##
## Family: gaussian
## Link function: identity
##
## Formula:
## value ~ sex + site + s(age_z, k = 10, bs = "cr") + s(sleep_z,
##           k = 5, bs = "cr")
## <environment: 0x558a4a807388>
##
## Parametric coefficients:
##           Estimate Std. Error t value Pr(>|t|)
## (Intercept) 1013.732      8.427 120.291 < 2e-16 ***
## sexmale      37.556       1.469  25.570 < 2e-16 ***
## siteMPIB     -74.721     10.956  -6.820 9.19e-12 ***
## siteousAvanto -33.520      8.626  -3.886 0.000102 ***
## siteousPrisma  1.735     14.482   0.120 0.904628
## siteousSkyra -42.963      8.383  -5.125 2.99e-07 ***
## siteUB       -92.596     26.345  -3.515 0.000441 ***
## siteUCAM     -43.664      9.529  -4.582 4.62e-06 ***
## siteUKB       14.950      8.648   1.729 0.083878 .
## siteUmU      -31.605     12.394  -2.550 0.010776 *
## siteUOXF     -40.418     10.347  -3.906 9.39e-05 ***
## ---
## Signif. codes:  0 '***' 0.001 '**' 0.01 '*' 0.05 '.' 0.1 ' ' 1
##

```

```

## Approximate significance of smooth terms:
##           edf Ref.df      F p-value
## s(age_z)   6.978  6.978 21.96 <2e-16 ***
## s(sleep_z) 3.569  3.569 11.60 <2e-16 ***
## ---
## Signif. codes:  0 '***' 0.001 '**' 0.01 '*' 0.05 '.' 0.1 ' ' 1
##
## R-sq.(adj) =  0.0287
## lmer.REML = 6.5356e+05  Scale est. = 1114.9    n = 51235

Model with full interaction between age and sleep

##
## Family: gaussian
## Link function: identity
##
## Formula:
## value ~ sex + site + t2(age_z, sleep_z, k = c(10, 4), bs = "cr")
## <environment: 0x558a4a807388>
##
## Parametric coefficients:
##           Estimate Std. Error t value Pr(>|t|)
## (Intercept) 1013.717      8.409 120.555 < 2e-16 ***
## sexmale      37.737       1.472  25.636 < 2e-16 ***
## siteMPIB     -75.710     10.983  -6.893 5.51e-12 ***
## siteousAvanto -33.725      8.659  -3.895 9.84e-05 ***
## siteousPrisma  1.262     14.515   0.087 0.930694
## siteousSkyra  -43.101      8.419  -5.120 3.07e-07 ***
## siteUB       -94.369     26.350  -3.581 0.000342 ***
## siteUCAM     -44.367      9.554  -4.644 3.43e-06 ***
## siteUKB       14.912       8.625   1.729 0.083843 .
## siteUmU      -32.167     12.401  -2.594 0.009493 **
## siteUOXF     -41.150     10.344  -3.978 6.95e-05 ***
## ---
## Signif. codes:  0 '***' 0.001 '**' 0.01 '*' 0.05 '.' 0.1 ' ' 1
##
## Approximate significance of smooth terms:
##           edf Ref.df      F p-value
## t2(age_z,sleep_z) 13.13  13.13 2.777  0.0165 *
## ---
## Signif. codes:  0 '***' 0.001 '**' 0.01 '*' 0.05 '.' 0.1 ' ' 1
##
## R-sq.(adj) =  0.0285
## lmer.REML = 6.5358e+05  Scale est. = 1115      n = 51235

```

## Model comparison

`mod_no_sleep` refers to model without sleep term, `mod_no_interaction` refers to model with only main effect of sleep, and `mod_full` refers to model with a full interaction between age and sleep. This is a nested model comparison, and the p-value at a given line refers to comparing the model at the line to the model on the line above. Hence, significance implies that the more complicated model is supported on statistical grounds.

To be even more specific, the p-value on the second row tests whether there is an association between sleep and volume. The p-value on the third row tests whether this association depends on age.

```

## Data: NULL
## Models:
## ml$mod_no_sleep$mer: NULL
## ml$mod_no_interaction$mer: NULL
## ml$mod_full$mer: NULL
##
##          npar    AIC    BIC logLik deviance Chisq Df Pr(>Chisq)
## ml$mod_no_sleep$mer      15 653626 653759 -326798   653596
## ml$mod_no_interaction$mer 17 653594 653744 -326780   653560 36.195  2 1.382e-08 ***
## ml$mod_full$mer          19 653618 653786 -326790   653580  0.000  2          1
## ---
## Signif. codes:  0 '***' 0.001 '**' 0.01 '*' 0.05 '.' 0.1 ' ' 1

```

We chose the model based on the likelihood ratio test with 5 % significance level, which was mod\_no\_interaction.

### Lifespan brain trajectory

The trajectory shown is from the chosen model mod\_no\_interaction\_no\_icv.

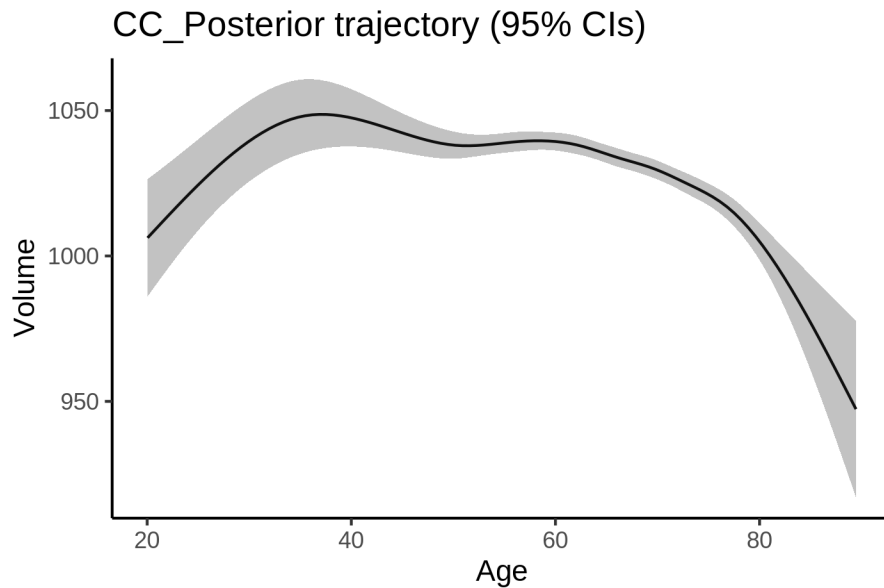

### Effect of sleep

The chosen model only included the main effect of sleep, and hence the effect does not vary with age. The black dot shows the average sleep duration across all ages in the sample.

CC\_Posterior sleep effect (95% CIs)

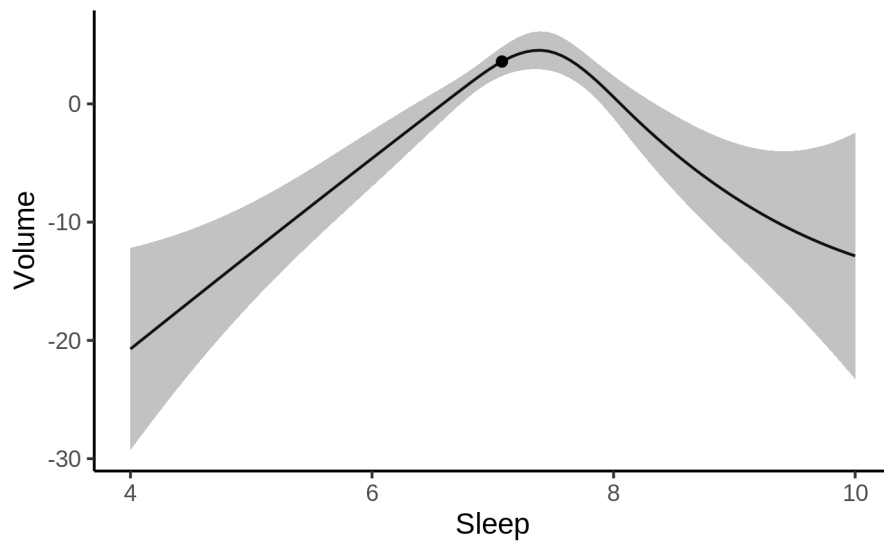

We also show the full interaction model for completeness, although it was not selected.

CC\_Posterior sleep effect (95% CIs)

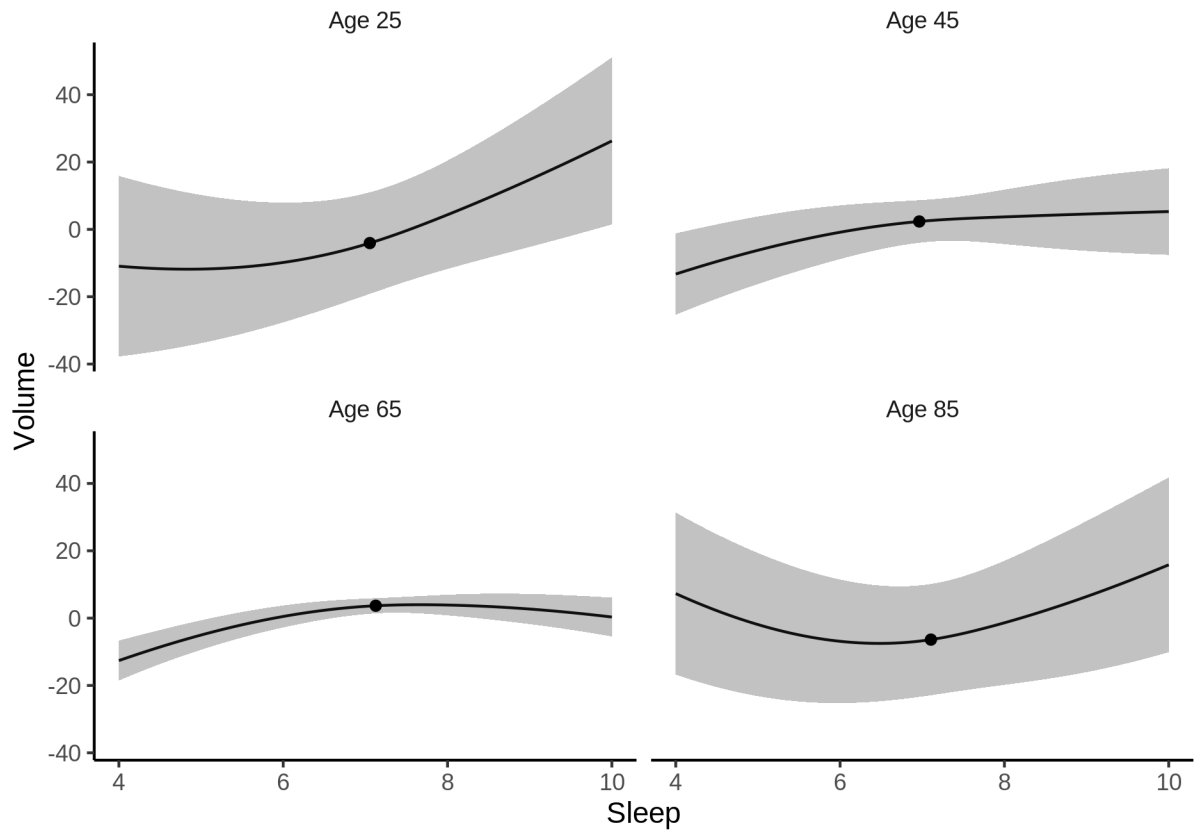

### Deviation from sleep associated with maximal volume

Model with only main effect of sleep was chosen, so we show it for all ages at once. Maximum volume is attained at 7.4 hours of sleep. The percentage values in the plot are calculated as follows: The maximum at 100 % refers to a person at an arbitrary age with a sleep duration associated with maximum volume. For a female, this volume is 1025 and for a male it is 1063. The other percentage values show how large the expected volume is for someone with other sleep durations. For example, 99 % implies a 1 % reduction.

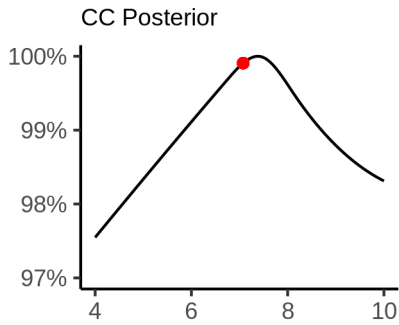

### Comparison of mean sleep and sleep associated with maximum volume

A 95 % confidence interval for the sleep associated with maximum volume is [7.27, 7.45].

The plot below compares average sleep to the sleep associated with maximum volume.

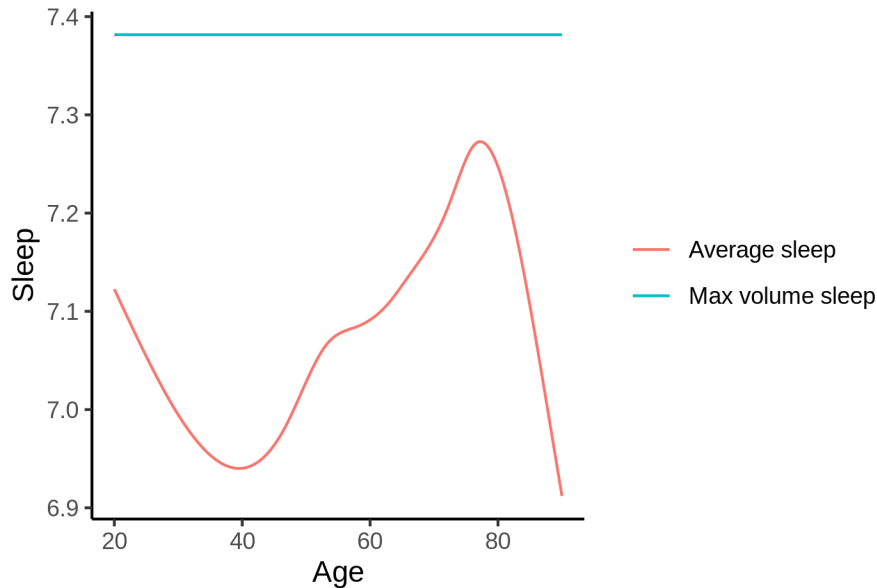

The next plot shows the difference between average sleep and sleep associated with maximum volume. The shaded region is a 95 % confidence interval.

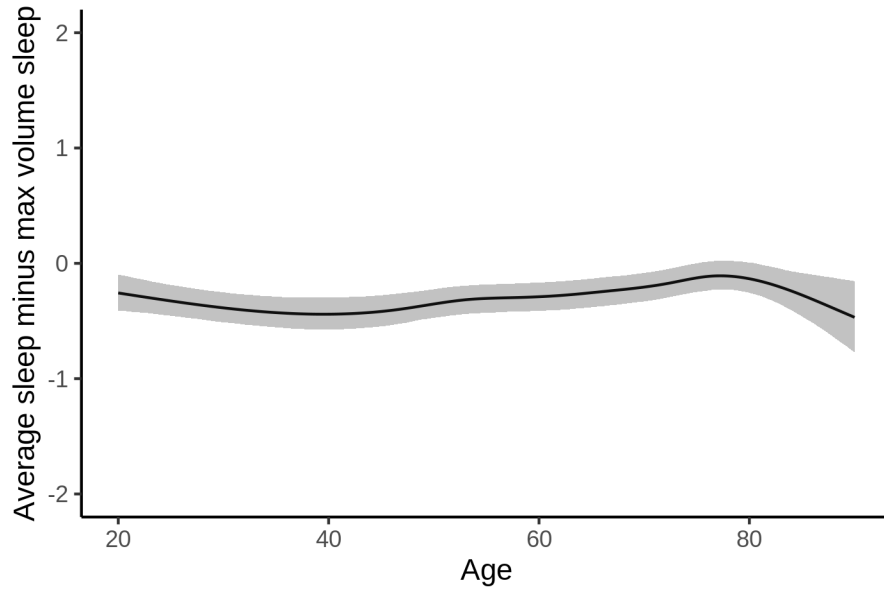

The next plot shows the probability that the sleep duration associated with maximum volume is longer than the average sleep duration, as a function of age. Probability below .05 can be interpreted as evidence that the sleep associated with maximum volume is shorter than the mean sleep, and probability above .95 can be interpreted the opposite way.

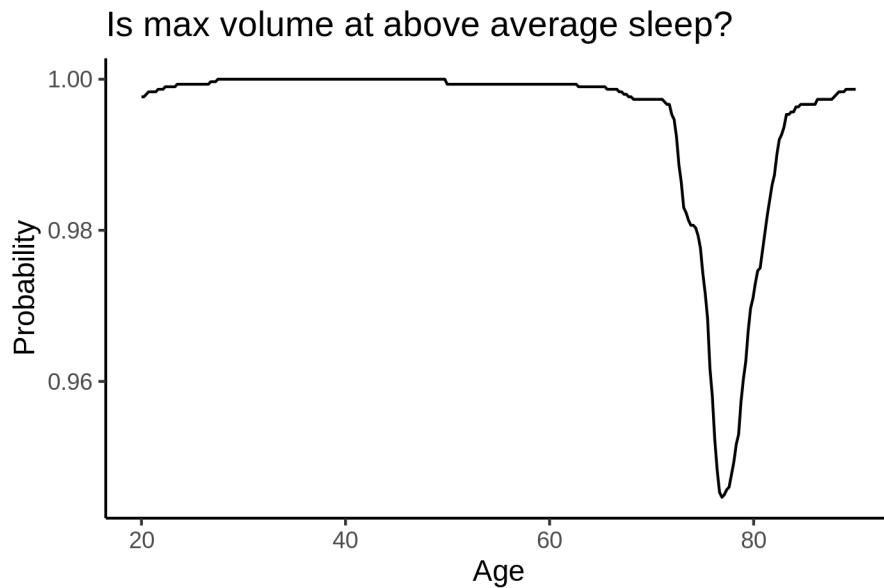

## Cerebellum-Cortex

### Descriptive statistics

| Study | Observations | Unique IDs | Mean age | Age range |
|-------|--------------|------------|----------|-----------|
| HCP   | 974          | 974        | 28.8     | 22 - 37   |
| MPIB  | 677          | 391        | 63.1     | 24 - 83   |

| Study | Observations | Unique IDs | Mean age | Age range |
|-------|--------------|------------|----------|-----------|
| UB    | 113          | 39         | 70.9     | 64 - 81   |
| UCAM  | 884          | 632        | 55.1     | 20 - 88   |
| UiO   | 1474         | 803        | 49.3     | 20 - 89   |
| UKB   | 45964        | 43128      | 64.5     | 45 - 83   |
| UmU   | 405          | 276        | 62.1     | 25 - 85   |
| UOXF  | 769          | 769        | 69.8     | 60 - 85   |

## Spaghetti plot

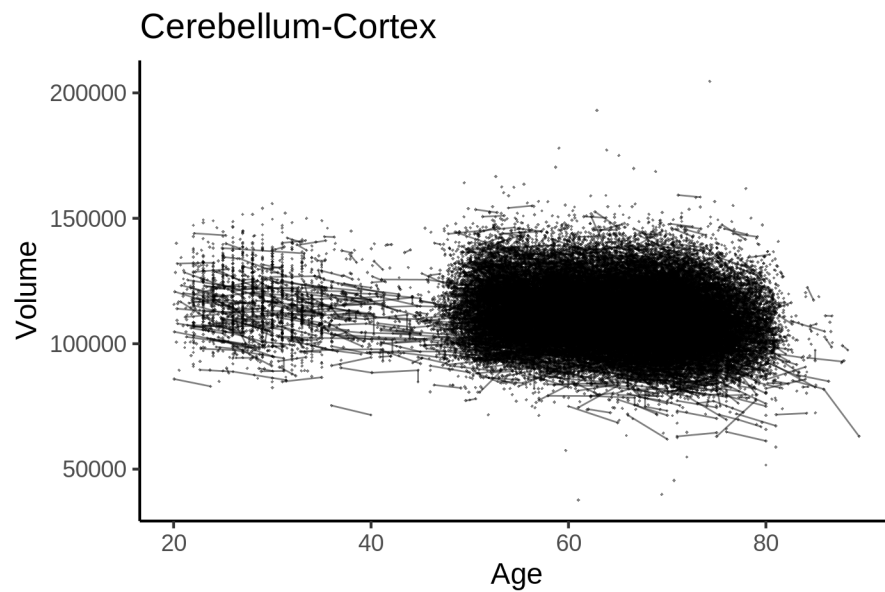

## Models Controlling for ICV

### Model outputs

Model without sleep term

```
##
## Family: gaussian
## Link function: identity
##
## Formula:
## value ~ sex + site + icv + s(age_z, k = 10, bs = "cr")
## <environment: 0x558ad68c20f0>
##
## Parametric coefficients:
##              Estimate Std. Error t value Pr(>|t|)
## (Intercept) 105008.45   492.70  213.129 < 2e-16 ***
## sexmale      5650.24    103.51   54.584 < 2e-16 ***
## siteMPIB     2227.29    641.50    3.472 0.000517 ***
## siteousAvanto -4745.47    502.73  -9.439 < 2e-16 ***
## siteousPrisma 2585.10    844.41    3.061 0.002204 **
## siteousSkyra -6909.69    487.22 -14.182 < 2e-16 ***
```



```

## siteUB          -5669.75    1527.92  -3.711 0.000207 ***
## siteUCAM        -589.69     554.11  -1.064 0.287233
## siteUKB          4610.09     504.79   9.133 < 2e-16 ***
## siteUmU         -12066.02    720.63 -16.744 < 2e-16 ***
## siteUOXF        -4878.14     603.17  -8.088 6.22e-16 ***
## icv              5476.97      51.94 105.449 < 2e-16 ***
## ---
## Signif. codes:  0 '***' 0.001 '**' 0.01 '*' 0.05 '.' 0.1 ' ' 1
##
## Approximate significance of smooth terms:
##           edf Ref.df      F p-value
## s(age_z)  7.404  7.404 345.2 <2e-16 ***
## ---
## Signif. codes:  0 '***' 0.001 '**' 0.01 '*' 0.05 '.' 0.1 ' ' 1
##
## R-sq.(adj) =  0.436
## lmer.REML = 1.0703e+06  Scale est. = 3.944e+06  n = 51260

Model with only main effects of age and sleep

##
## Family: gaussian
## Link function: identity
##
## Formula:
## value ~ sex + site + icv + s(age_z, k = 10, bs = "cr") + s(sleep_z,
## k = 5, bs = "cr")
## <environment: 0x558ad68c20f0>
##
## Parametric coefficients:
##           Estimate Std. Error t value Pr(>|t|)
## (Intercept) 105023.57   493.12  212.978 < 2e-16 ***
## sexmale      5648.52    103.49   54.579 < 2e-16 ***
## siteMPIB     2261.49    641.73   3.524 0.000425 ***
## siteousAvanto -4766.33   502.79  -9.480 < 2e-16 ***
## siteousPrisma 2568.95    844.26   3.043 0.002345 **
## siteousSkyra -6938.02   487.31 -14.237 < 2e-16 ***
## siteUB       -5614.83  1527.45  -3.676 0.000237 ***
## siteUCAM     -567.72    554.06  -1.025 0.305529
## siteUKB      4594.52    505.27   9.093 < 2e-16 ***
## siteUmU     -11980.80   722.08 -16.592 < 2e-16 ***
## siteUOXF    -4885.54    603.11  -8.101 5.59e-16 ***
## icv          5469.38     51.98 105.215 < 2e-16 ***
## ---
## Signif. codes:  0 '***' 0.001 '**' 0.01 '*' 0.05 '.' 0.1 ' ' 1
##
## Approximate significance of smooth terms:
##           edf Ref.df      F p-value
## s(age_z)   7.404  7.404 339.735 < 2e-16 ***
## s(sleep_z) 3.417  3.417  7.635 1.42e-05 ***
## ---
## Signif. codes:  0 '***' 0.001 '**' 0.01 '*' 0.05 '.' 0.1 ' ' 1
##
## R-sq.(adj) =  0.436
## lmer.REML = 1.0703e+06  Scale est. = 3.9447e+06  n = 51260

```

Model with full interaction between age and sleep

```
##
## Family: gaussian
## Link function: identity
##
## Formula:
## value ~ sex + site + icv + t2(age_z, sleep_z, k = c(10, 4), bs = "cr")
## <environment: 0x558ad68c20f0>
##
## Parametric coefficients:
##           Estimate Std. Error t value Pr(>|t|)
## (Intercept) 105071.76    496.04 211.819 < 2e-16 ***
## sexmale      5643.56     103.72  54.411 < 2e-16 ***
## siteMPIB     2173.13     645.52   3.366 0.000762 ***
## siteousAvanto -4810.61    506.06  -9.506 < 2e-16 ***
## siteousPrisma 2522.26     846.50   2.980 0.002887 **
## siteousSkyra -6975.90    490.80 -14.213 < 2e-16 ***
## siteUB       -5723.83   1528.91  -3.744 0.000182 ***
## siteUCAM     -669.22     557.55  -1.200 0.230034
## siteUKB      4549.35     508.24   8.951 < 2e-16 ***
## siteUmU     -12071.90    724.84 -16.655 < 2e-16 ***
## siteUOXF     -4945.90    606.28  -8.158 3.49e-16 ***
## icv          5475.76     51.97 105.360 < 2e-16 ***
## ---
## Signif. codes:  0 '***' 0.001 '**' 0.01 '*' 0.05 '.' 0.1 ' ' 1
##
## Approximate significance of smooth terms:
##           edf Ref.df    F p-value
## t2(age_z,sleep_z) 13.72 13.72 11.95 <2e-16 ***
## ---
## Signif. codes:  0 '***' 0.001 '**' 0.01 '*' 0.05 '.' 0.1 ' ' 1
##
## R-sq.(adj) = 0.436
## lmer.REML = 1.0703e+06 Scale est. = 3.9476e+06 n = 51260
```

## Model comparison

`mod_no_sleep` refers to model without sleep term, `mod_no_interaction` refers to model with only main effect of sleep, and `mod_full` refers to model with a full interaction between age and sleep. This is a nested model comparison, and the p-value at a given line refers to comparing the model at the line to the model on the line above. Hence, significance implies that the more complicated model is supported on statistical grounds.

To be even more specific, the p-value on the second row tests whether there is an association between sleep and volume. The p-value on the third row tests whether this association depends on age.

```
## Data: NULL
## Models:
## ml$mod_no_sleep$mer: NULL
## ml$mod_no_interaction$mer: NULL
## ml$mod_full$mer: NULL
##           npar      AIC      BIC logLik deviance Chisq Df Pr(>Chisq)
## ml$mod_no_sleep$mer      16 1070340 1070481 -535154 1070308
## ml$mod_no_interaction$mer 18 1070323 1070482 -535143 1070287 21.026 2 2.718e-05 ***
```

```
## ml$mod_full$mer          20 1070343 1070520 -535151 1070303 0.000 2      1
## ---
## Signif. codes:  0 '***' 0.001 '**' 0.01 '*' 0.05 '.' 0.1 ' ' 1
```

We chose the model based on the likelihood ratio test with 5 % significance level, which was `mod_no_interaction`.

### Lifespan brain trajectory

The trajectory shown is from the chosen model `mod_no_interaction`.

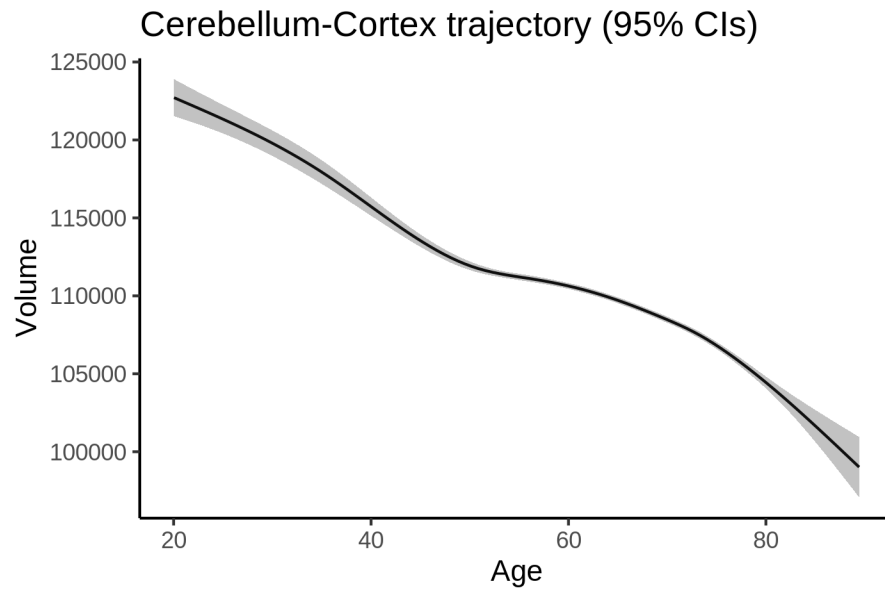

### Effect of sleep

The chosen model only included the main effect of sleep, and hence the effect does not vary with age. The black dot shows the average sleep duration across all ages in the sample.

Cerebellum-Cortex sleep effect (95% CIs)

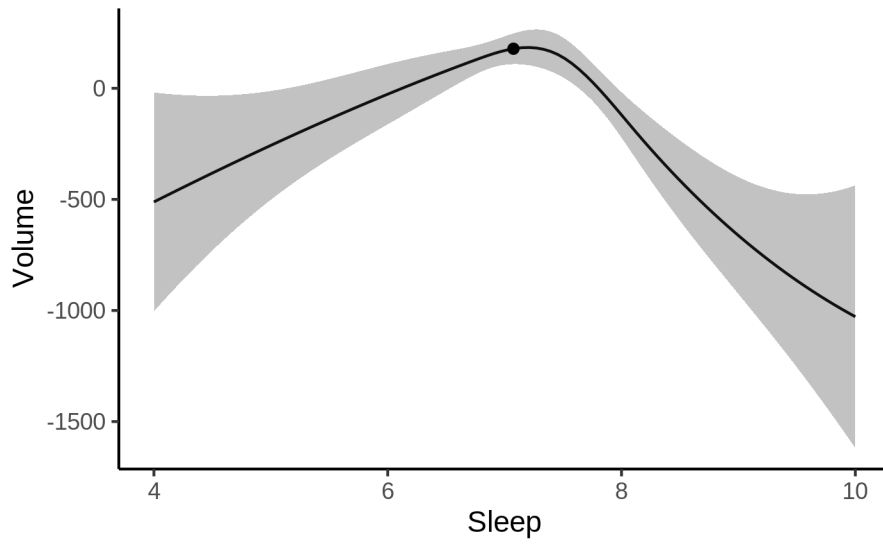

We also show the full interaction model for completeness, although it was not selected.

Cerebellum-Cortex sleep effect (95% CIs)

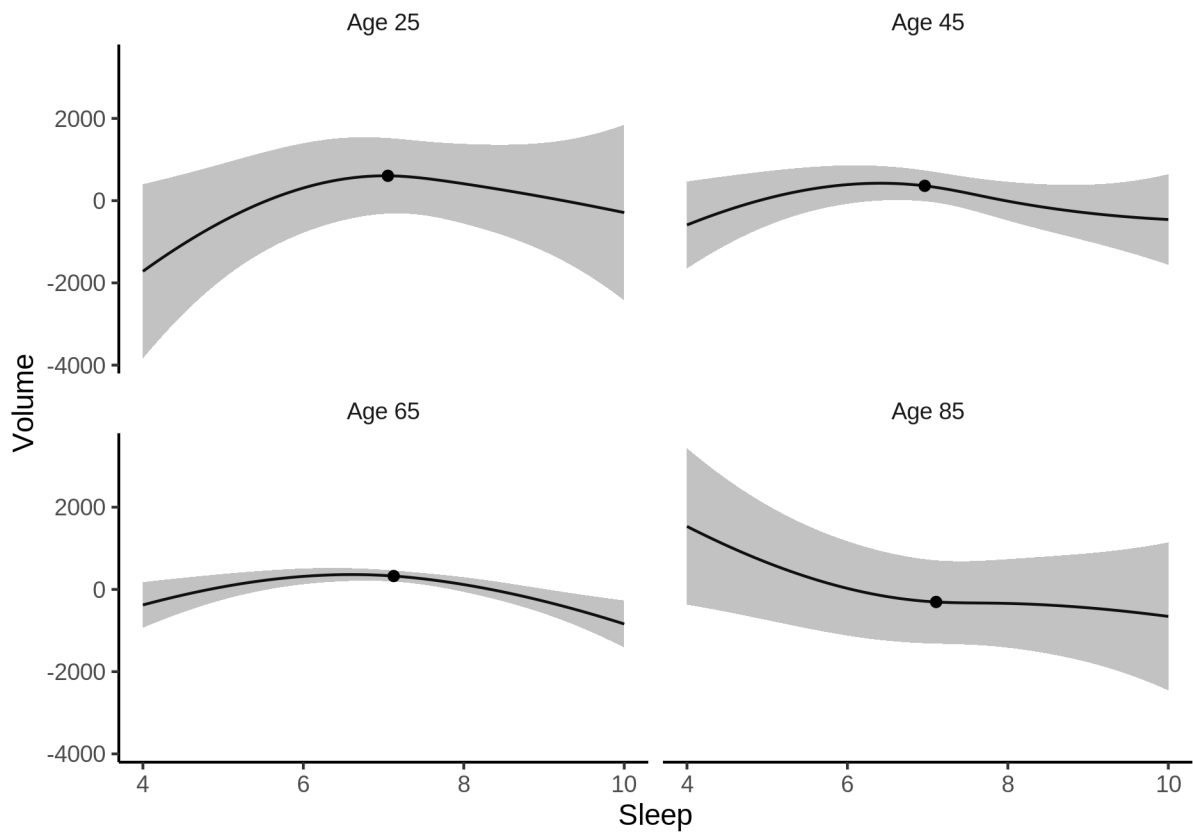

### Deviation from sleep associated with maximal volume

Model with only main effect of sleep was chosen, so we show it for all ages at once. Maximum volume is attained at 7.2 hours of sleep. The percentage values in the plot are calculated as follows: The maximum at 100 % refers to a person at an arbitrary age with a sleep duration associated with maximum volume. For a female, this volume is 111685 and for a male it is 117333. The other percentage values show how large the expected volume is for someone with other sleep durations. For example, 99 % implies a 1 % reduction.

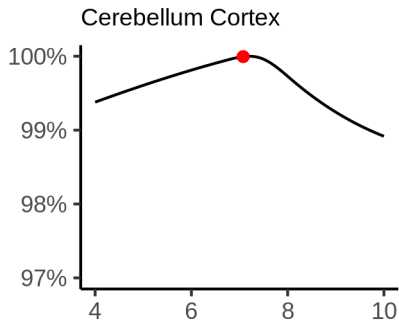

### Comparison of mean sleep and sleep associated with maximum volume

A 95 % confidence interval for the sleep associated with maximum volume is [6.79, 7.33].

The plot below compares average sleep to the sleep associated with maximum volume.

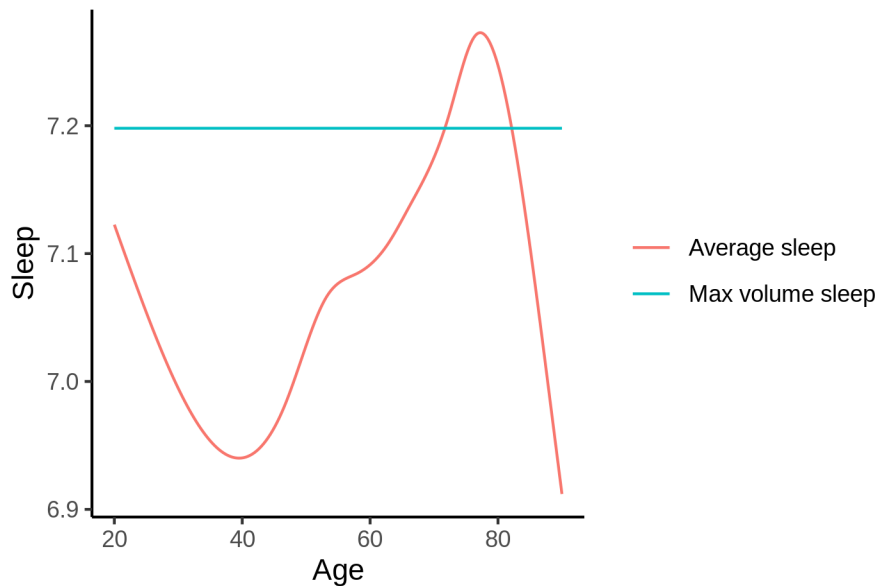

The next plot shows the difference between average sleep and sleep associated with maximum volume. The shaded region is a 95 % confidence interval.

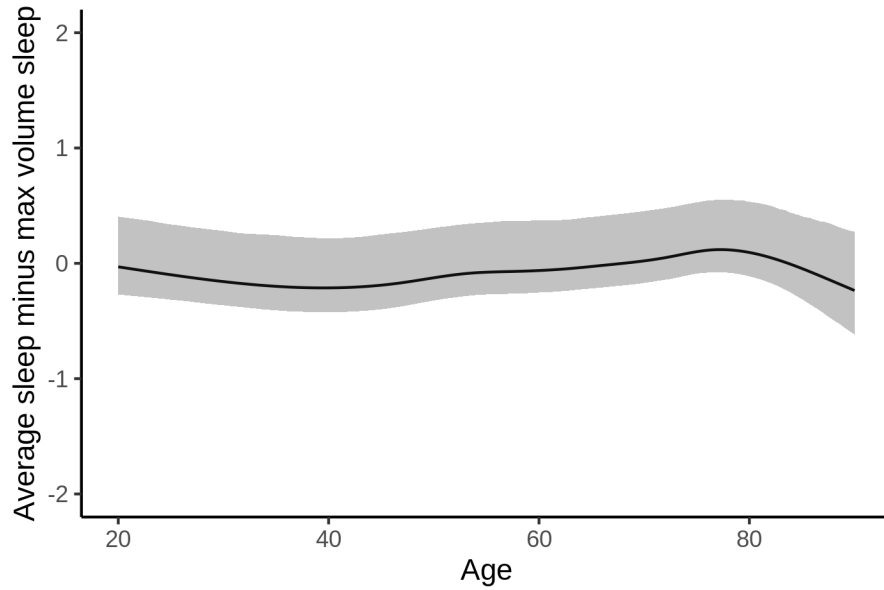

The next plot shows the probability that the sleep duration associated with maximum volume is longer than the average sleep duration, as a function of age. Probability below .05 can be interpreted as evidence that the sleep associated with maximum volume is shorter than the mean sleep, and probability above .95 can be interpreted the opposite way.

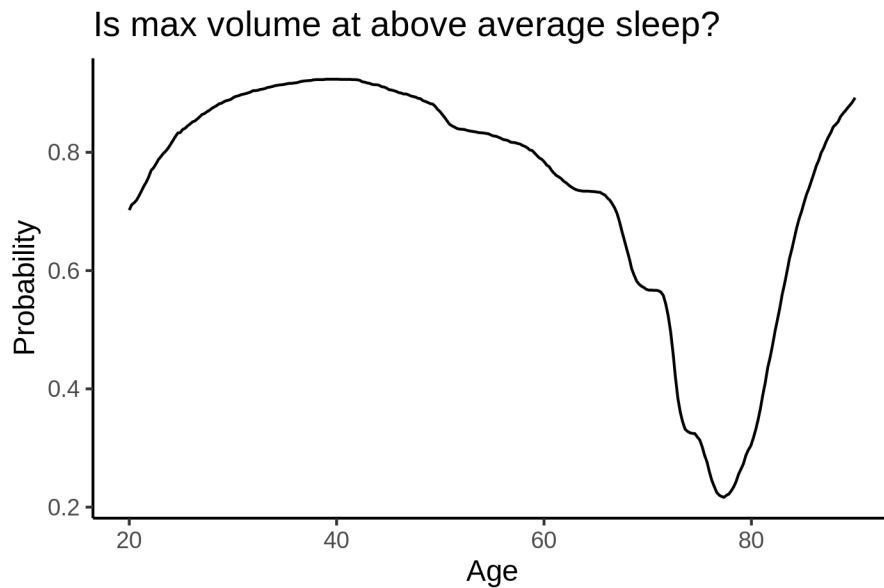

### Controlling for covariates

Below is the output for a model in which we only include data with income and education.

```
##
## Family: gaussian
## Link function: identity
##
## Formula:
```

```

## value ~ sex + site + s(age_z, k = 10, bs = "cr") + s(sleep_z,
##   k = 5, bs = "cr") + icv
## <environment: 0x558a4695c550>
##
## Parametric coefficients:
##           Estimate Std. Error t value Pr(>|t|)
## (Intercept) 108960.76   1207.77  90.217 < 2e-16 ***
## sexmale      5582.76    132.41  42.163 < 2e-16 ***
## siteousAvanto -10148.35  1398.56  -7.256 4.07e-13 ***
## siteousPrisma  -14.98   1467.78  -0.010  0.992
## siteousSkyra -11244.89  1306.60  -8.606 < 2e-16 ***
## siteUKB       534.83   1205.32   0.444  0.657
## siteUOXF     -7639.12  1356.11  -5.633 1.78e-08 ***
## icv           5663.68    67.88  83.433 < 2e-16 ***
## ---
## Signif. codes:  0 '***' 0.001 '**' 0.01 '*' 0.05 '.' 0.1 ' ' 1
##
## Approximate significance of smooth terms:
##           edf Ref.df      F p-value
## s(age_z)   6.036  6.036 168.237 <2e-16 ***
## s(sleep_z) 2.728  2.728   5.459  0.0019 **
## ---
## Signif. codes:  0 '***' 0.001 '**' 0.01 '*' 0.05 '.' 0.1 ' ' 1
##
## R-sq.(adj) =  0.408
## lmer.REML = 6.513e+05  Scale est. = 3.8427e+06  n = 31180

```

Below is the output for a model in which we control for the main effects of income and education.

```

##
## Family: gaussian
## Link function: identity
##
## Formula:
## value ~ sex + site + s(age_z, k = 10, bs = "cr") + s(sleep_z,
##   k = 5, bs = "cr") + icv + income_scaled + education_scaled
## <environment: 0x558a4695c550>
##
## Parametric coefficients:
##           Estimate Std. Error t value Pr(>|t|)
## (Intercept) 107614.93   1213.67  88.669 < 2e-16 ***
## sexmale      5576.85    132.56  42.071 < 2e-16 ***
## siteousAvanto -10113.57  1396.91  -7.240 4.59e-13 ***
## siteousPrisma  -121.76   1465.54  -0.083  0.934
## siteousSkyra -11232.68  1304.71  -8.609 < 2e-16 ***
## siteUKB       567.24   1204.37   0.471  0.638
## siteUOXF     -7203.91  1354.87  -5.317 1.06e-07 ***
## icv           5576.85    68.33  81.620 < 2e-16 ***
## income_scaled  1017.96    157.45   6.465 1.03e-10 ***
## education_scaled 1071.70    186.38   5.750 9.00e-09 ***
## ---
## Signif. codes:  0 '***' 0.001 '**' 0.01 '*' 0.05 '.' 0.1 ' ' 1
##
## Approximate significance of smooth terms:
##           edf Ref.df      F p-value

```

```

## s(age_z) 6.156 6.156 140.661 <2e-16 ***
## s(sleep_z) 2.284 2.284 4.245 0.0115 *
## ---
## Signif. codes: 0 '***' 0.001 '**' 0.01 '*' 0.05 '.' 0.1 ' ' 1
##
## R-sq.(adj) = 0.41
## lmer.REML = 6.5117e+05 Scale est. = 3.8472e+06 n = 31180

```

We also included interaction effects between sleep duration and education and income, in another model. The output is shown below, and the interaction terms are `income_scaled:sleep_z` and `education_scaled:sleep_z`.

```

##
## Family: gaussian
## Link function: identity
##
## Formula:
## value ~ sex + site + s(age_z, k = 10, bs = "cr") + s(sleep_z,
## k = 5, bs = "cr") + icv + income_scaled + education_scaled +
## income_scaled:sleep_z + education_scaled:sleep_z
## <environment: 0x558a4695c550>
##
## Parametric coefficients:
##
## Estimate Std. Error t value Pr(>|t|)
## (Intercept) 107628.57 1213.72 88.677 < 2e-16 ***
## sexmale 5565.78 132.64 41.960 < 2e-16 ***
## siteousAvanto -10137.58 1396.88 -7.257 4.04e-13 ***
## siteousPrisma -169.96 1465.61 -0.116 0.9077
## siteousSkyra -11255.57 1304.68 -8.627 < 2e-16 ***
## siteUKB 552.29 1204.45 0.459 0.6466
## siteUOXF -7219.16 1355.20 -5.327 1.01e-07 ***
## icv 5578.45 68.33 81.639 < 2e-16 ***
## income_scaled 1028.34 157.53 6.528 6.77e-11 ***
## education_scaled 1063.98 186.40 5.708 1.15e-08 ***
## income_scaled:sleep_z -291.52 156.73 -1.860 0.0629 .
## education_scaled:sleep_z 328.17 180.79 1.815 0.0695 .
## ---
## Signif. codes: 0 '***' 0.001 '**' 0.01 '*' 0.05 '.' 0.1 ' ' 1
##
## Approximate significance of smooth terms:
## edf Ref.df F p-value
## s(age_z) 6.162 6.162 140.298 <2e-16 ***
## s(sleep_z) 2.332 2.332 3.349 0.0342 *
## ---
## Signif. codes: 0 '***' 0.001 '**' 0.01 '*' 0.05 '.' 0.1 ' ' 1
##
## R-sq.(adj) = 0.41
## lmer.REML = 6.5114e+05 Scale est. = 3.8472e+06 n = 31180

```

We did the same controlling for BMI. Below is the model with no covariates but only keeping data with BMI.

```

##
## Family: gaussian
## Link function: identity
##
## Formula:

```



```

## value ~ sex + site + s(age_z, k = 10, bs = "cr") + s(sleep_z,
##     k = 5, bs = "cr") + icv
## <environment: 0x55896137edd8>
##
## Parametric coefficients:
##           Estimate Std. Error t value Pr(>|t|)
## (Intercept)  98809.64    730.46 135.270 < 2e-16 ***
## sexmale      5572.67    128.36  43.414 < 2e-16 ***
## siteousPrisma 8219.31    974.87   8.431 < 2e-16 ***
## siteousSkyra -966.00    511.87  -1.887  0.0591 .
## siteUCAM     5482.29    780.91   7.020 2.25e-12 ***
## siteUKB     10771.24    738.00  14.595 < 2e-16 ***
## siteUmU     -5757.06    905.16  -6.360 2.04e-10 ***
## icv         5643.96     66.04  85.466 < 2e-16 ***
## ---
## Signif. codes:  0 '***' 0.001 '**' 0.01 '*' 0.05 '.' 0.1 ' ' 1
##
## Approximate significance of smooth terms:
##           edf Ref.df      F p-value
## s(age_z)   6.646  6.646 225.333 < 2e-16 ***
## s(sleep_z) 2.742  2.742   5.497 0.00116 **
## ---
## Signif. codes:  0 '***' 0.001 '**' 0.01 '*' 0.05 '.' 0.1 ' ' 1
##
## R-sq.(adj) =  0.428
## lmer.REML = 6.9782e+05  Scale est. = 4.0433e+06  n = 33429

```

Below is the model output with main effect.

```

##
## Family: gaussian
## Link function: identity
##
## Formula:
## value ~ sex + site + s(age_z, k = 10, bs = "cr") + s(sleep_z,
##     k = 5, bs = "cr") + icv + bmi
## <environment: 0x55896137edd8>
##
## Parametric coefficients:
##           Estimate Std. Error t value Pr(>|t|)
## (Intercept) 102585.45    794.68 129.090 < 2e-16 ***
## sexmale      5691.92    128.46  44.311 < 2e-16 ***
## siteousPrisma 8342.91    973.66   8.569 < 2e-16 ***
## siteousSkyra -955.31    511.75  -1.867  0.0619 .
## siteUCAM     5562.12    779.80   7.133 1.00e-12 ***
## siteUKB     10892.82    737.06  14.779 < 2e-16 ***
## siteUmU     -5600.19    903.74  -6.197 5.83e-10 ***
## icv         5667.54     65.91  85.989 < 2e-16 ***
## bmi         -149.90     12.50 -11.990 < 2e-16 ***
## ---
## Signif. codes:  0 '***' 0.001 '**' 0.01 '*' 0.05 '.' 0.1 ' ' 1
##
## Approximate significance of smooth terms:
##           edf Ref.df      F p-value
## s(age_z)   6.634  6.634 225.845 < 2e-16 ***

```

```
## s(sleep_z) 2.382 2.382 5.905 0.00161 **
## ---
## Signif. codes: 0 '***' 0.001 '**' 0.01 '*' 0.05 '.' 0.1 ' ' 1
##
## R-sq.(adj) = 0.43
## lmer.REML = 6.9767e+05 Scale est. = 4.0424e+06 n = 33429
```

Next is the model with BMI-sleep interaction.

```
##
## Family: gaussian
## Link function: identity
##
## Formula:
## value ~ sex + site + s(age_z, k = 10, bs = "cr") + s(sleep_z,
##     k = 5, bs = "cr") + icv + bmi + bmi:sleep_z
## <environment: 0x55896137edd8>
##
## Parametric coefficients:
##           Estimate Std. Error t value Pr(>|t|)
## (Intercept) 1.026e+05 7.951e+02 129.019 < 2e-16 ***
## sexmale      5.692e+03 1.285e+02 44.309 < 2e-16 ***
## siteousPrisma 8.343e+03 9.737e+02 8.568 < 2e-16 ***
## siteousSkyra -9.553e+02 5.118e+02 -1.867 0.0619 .
## siteUCAM     5.562e+03 7.799e+02 7.132 1.01e-12 ***
## siteUKB      1.089e+04 7.371e+02 14.777 < 2e-16 ***
## siteUmU      -5.600e+03 9.038e+02 -6.196 5.84e-10 ***
## icv          5.668e+03 6.591e+01 85.985 < 2e-16 ***
## bmi          -1.499e+02 1.251e+01 -11.983 < 2e-16 ***
## bmi:sleep_z  -1.392e-01 1.185e+01 -0.012 0.9906
## ---
## Signif. codes: 0 '***' 0.001 '**' 0.01 '*' 0.05 '.' 0.1 ' ' 1
##
## Approximate significance of smooth terms:
##           edf Ref.df      F p-value
## s(age_z)   6.634 6.634 225.74 <2e-16 ***
## s(sleep_z) 2.381 2.381 2.22 0.095 .
## ---
## Signif. codes: 0 '***' 0.001 '**' 0.01 '*' 0.05 '.' 0.1 ' ' 1
##
## R-sq.(adj) = 0.43
## lmer.REML = 6.9767e+05 Scale est. = 4.0424e+06 n = 33429
```

We did the same controlling for depression. Below is the model with no covariates but only keeping data with depression.

```
##
## Family: gaussian
## Link function: identity
##
## Formula:
## value ~ sex + site + s(age_z, k = 10, bs = "cr") + s(sleep_z,
##     k = 5, bs = "cr") + icv
## <environment: 0x558962057e18>
##
## Parametric coefficients:
```

```

##           Estimate Std. Error t value Pr(>|t|)
## (Intercept) 106215.39    615.75 172.498 < 2e-16 ***
## sexmale      5603.57     128.83  43.498 < 2e-16 ***
## siteousAvanto -5079.60   1175.60  -4.321 1.56e-05 ***
## siteousPrisma 1630.21    1149.66   1.418 0.15620
## siteousSkyra -7300.10    915.11  -7.977 1.54e-15 ***
## siteUCAM     -2195.05    842.51  -2.605 0.00918 **
## siteUKB      3279.97    609.01   5.386 7.26e-08 ***
## siteUmU     -13196.02   826.07 -15.974 < 2e-16 ***
## icv          5623.01     66.16  84.986 < 2e-16 ***
## ---
## Signif. codes:  0 '***' 0.001 '**' 0.01 '*' 0.05 '.' 0.1 ' ' 1
##
## Approximate significance of smooth terms:
##           edf Ref.df      F p-value
## s(age_z)   6.882  6.882 173.15 < 2e-16 ***
## s(sleep_z) 2.782  2.782   6.43 0.000825 ***
## ---
## Signif. codes:  0 '***' 0.001 '**' 0.01 '*' 0.05 '.' 0.1 ' ' 1
##
## R-sq.(adj) =  0.425
## lmer.REML = 6.9552e+05  Scale est. = 3.795e+06  n = 33341

```

Below is the model output with main effect.

```

##
## Family: gaussian
## Link function: identity
##
## Formula:
## value ~ sex + site + s(age_z, k = 10, bs = "cr") + s(sleep_z,
##           k = 5, bs = "cr") + icv + depression
## <environment: 0x558962057e18>
##
## Parametric coefficients:
##           Estimate Std. Error t value Pr(>|t|)
## (Intercept) 106436.61    618.22 172.167 < 2e-16 ***
## sexmale      5580.15     128.93  43.280 < 2e-16 ***
## siteousAvanto -4961.26   1175.70  -4.220 2.45e-05 ***
## siteousPrisma 1738.82    1149.65   1.512 0.130
## siteousSkyra -7167.82    915.40  -7.830 5.01e-15 ***
## siteUCAM     -2141.92    842.39  -2.543 0.011 *
## siteUKB      3189.83    609.32   5.235 1.66e-07 ***
## siteUmU     -12517.50   843.59 -14.838 < 2e-16 ***
## icv          5626.59     66.15  85.057 < 2e-16 ***
## depression   -1817.93    461.13  -3.942 8.09e-05 ***
## ---
## Signif. codes:  0 '***' 0.001 '**' 0.01 '*' 0.05 '.' 0.1 ' ' 1
##
## Approximate significance of smooth terms:
##           edf Ref.df      F p-value
## s(age_z)   6.864  6.864 176.06 < 2e-16 ***
## s(sleep_z) 2.566  2.566   6.14 0.00132 **
## ---
## Signif. codes:  0 '***' 0.001 '**' 0.01 '*' 0.05 '.' 0.1 ' ' 1

```

```
##
## R-sq.(adj) = 0.426
## lmer.REML = 6.9549e+05 Scale est. = 3.7947e+06 n = 33341
```

Next is the model with depression-sleep interaction.

```
##
## Family: gaussian
## Link function: identity
##
## Formula:
## value ~ sex + site + s(age_z, k = 10, bs = "cr") + s(sleep_z,
##      k = 5, bs = "cr") + icv + depression + depression:sleep_z
## <environment: 0x558962057e18>
##
## Parametric coefficients:
##              Estimate Std. Error t value Pr(>|t|)
## (Intercept)  106436.96    618.21  172.169 < 2e-16 ***
## sexmale      5577.38     128.95   43.252 < 2e-16 ***
## siteousAvanto -4980.18    1175.80  -4.236 2.29e-05 ***
## siteousPrisma  1719.59    1149.75   1.496 0.1348
## siteousSkyra  -7186.06    915.52  -7.849 4.31e-15 ***
## siteUCAM     -2161.59    842.55  -2.566 0.0103 *
## siteUKB      3190.41    609.32   5.236 1.65e-07 ***
## siteUmU     -12385.89    850.95 -14.555 < 2e-16 ***
## icv          5626.74     66.15   85.058 < 2e-16 ***
## depression   -1849.86    462.10  -4.003 6.26e-05 ***
## depression:sleep_z -403.02    339.93  -1.186 0.2358
## ---
## Signif. codes:  0 '***' 0.001 '**' 0.01 '*' 0.05 '.' 0.1 ' ' 1
##
## Approximate significance of smooth terms:
##              edf Ref.df      F p-value
## s(age_z)     6.862  6.862 176.19 <2e-16 ***
## s(sleep_z)   2.597  2.597   4.05 0.0126 *
## ---
## Signif. codes:  0 '***' 0.001 '**' 0.01 '*' 0.05 '.' 0.1 ' ' 1
##
## R-sq.(adj) = 0.426
## lmer.REML = 6.9547e+05 Scale est. = 3.7946e+06 n = 33341
```

The plot below shows the sleep-volume curve for the original model and for the model with main effects of SES.

### Cerebellum-Cortex sleep effect, covariates

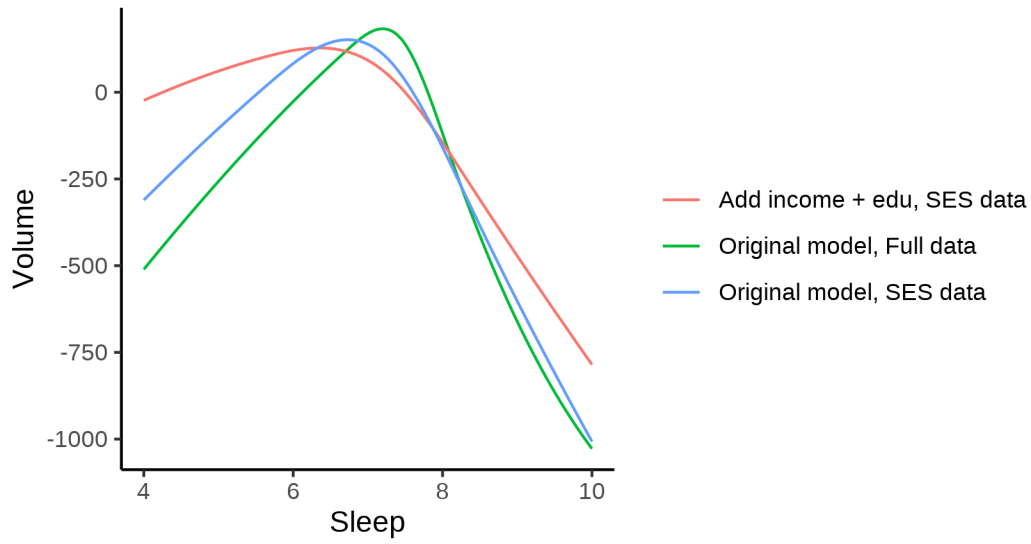

The plot below shows the sleep-volume curve for the original model and for the model with main effects of BMI.

### Cerebellum-Cortex sleep effect, covariates

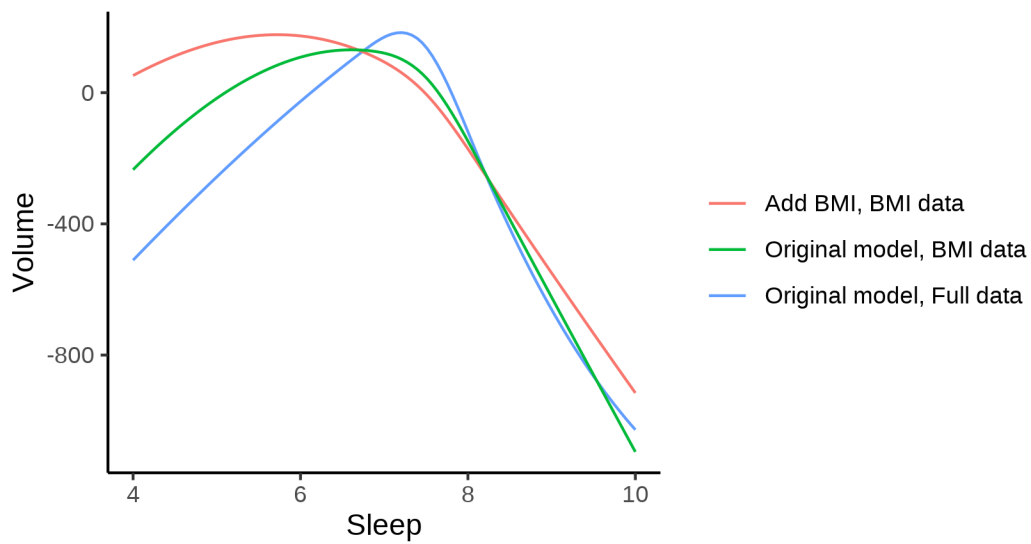

The plot below shows the sleep-volume curve for the original model and for the model with main effects of depression.

## Cerebellum-Cortex sleep effect, covariates

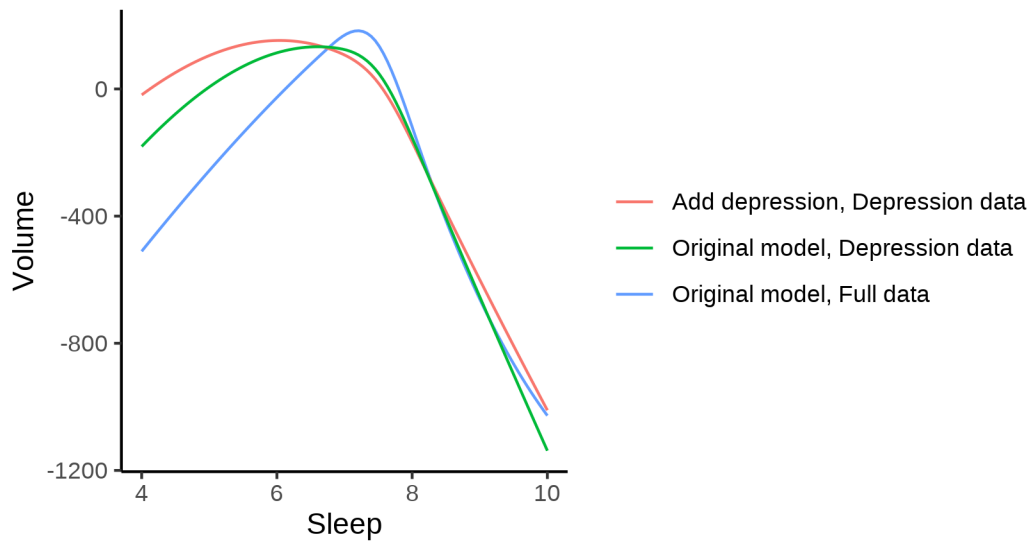

## Models Not controlling for ICV

### Model outputs

Model without sleep term

```
##
## Family: gaussian
## Link function: identity
##
## Formula:
## value ~ sex + site + s(age_z, k = 10, bs = "cr")
## <environment: 0x558a46094a40>
##
## Parametric coefficients:
##              Estimate Std. Error t value Pr(>|t|)
## (Intercept)  101973.96    534.27  190.865 < 2e-16 ***
## sexmale      11864.73     94.45  125.614 < 2e-16 ***
## siteMPIB     -6554.64    701.02  -9.350 < 2e-16 ***
## siteousAvanto -2413.70    550.36  -4.386 1.16e-05 ***
## siteousPrisma  4065.09    920.89   4.414 1.02e-05 ***
## siteousSkyra  -6559.20    536.68 -12.222 < 2e-16 ***
## siteUB       -7265.62   1695.19  -4.286 1.82e-05 ***
## siteUCAM     -273.78    609.32  -0.449  0.653
## siteUKB      4801.39    548.08   8.760 < 2e-16 ***
## siteUmU     -14269.58    793.43 -17.985 < 2e-16 ***
## siteUOXF    -6128.31    659.43  -9.293 < 2e-16 ***
## ---
## Signif. codes:  0 '***' 0.001 '**' 0.01 '*' 0.05 '.' 0.1 ' ' 1
##
## Approximate significance of smooth terms:
##              edf Ref.df    F p-value
## s(age_z)    6.495  6.495 436.2 <2e-16 ***
```

```
## ---
## Signif. codes:  0 '***' 0.001 '**' 0.01 '*' 0.05 '.' 0.1 ' ' 1
##
## R-sq.(adj) =  0.306
## lmer.REML = 1.0803e+06  Scale est. = 4.1449e+06  n = 51260
```

Model with only main effects of age and sleep

```
##
## Family: gaussian
## Link function: identity
##
## Formula:
## value ~ sex + site + s(age_z, k = 10, bs = "cr") + s(sleep_z,
##       k = 5, bs = "cr")
## <environment: 0x558a46094a40>
##
## Parametric coefficients:
##           Estimate Std. Error t value Pr(>|t|)
## (Intercept) 102110.04    534.53 191.029 < 2e-16 ***
## sexmale      11840.93     94.44 125.380 < 2e-16 ***
## siteMPIB     -6563.56    700.83  -9.365 < 2e-16 ***
## siteousAvanto -2512.30    550.21  -4.566 4.98e-06 ***
## siteousPrisma 3990.25    920.40   4.335 1.46e-05 ***
## siteousSkyra  -6665.23    536.52 -12.423 < 2e-16 ***
## siteUB       -7183.60   1693.85  -4.241 2.23e-05 ***
## siteUCAM     -281.09    608.96  -0.462  0.644
## siteUKB      4669.32    548.33   8.516 < 2e-16 ***
## siteUmU     -14322.52    794.58 -18.025 < 2e-16 ***
## siteUOXF     -6183.70    659.02  -9.383 < 2e-16 ***
```

```
## ---
## Signif. codes:  0 '***' 0.001 '**' 0.01 '*' 0.05 '.' 0.1 ' ' 1
##
## Approximate significance of smooth terms:
##           edf Ref.df      F p-value
## s(age_z)   6.485  6.485 429.04 <2e-16 ***
## s(sleep_z) 3.732  3.732  18.41 <2e-16 ***
```

```
## ---
## Signif. codes:  0 '***' 0.001 '**' 0.01 '*' 0.05 '.' 0.1 ' ' 1
##
## R-sq.(adj) =  0.307
## lmer.REML = 1.0803e+06  Scale est. = 4.1455e+06  n = 51260
```

Model with full interaction between age and sleep

```
##
## Family: gaussian
## Link function: identity
##
## Formula:
## value ~ sex + site + t2(age_z, sleep_z, k = c(10, 4), bs = "cr")
## <environment: 0x558a46094a40>
##
## Parametric coefficients:
##           Estimate Std. Error t value Pr(>|t|)
## (Intercept) 102152.85    542.03 188.464 < 2e-16 ***
```

```

## sexmale      11859.92      94.67 125.280 < 2e-16 ***
## siteMPIB     -6741.70     706.83 -9.538 < 2e-16 ***
## siteousAvanto -2552.52     555.22 -4.597 4.29e-06 ***
## siteousPrisma 3942.66     923.48  4.269 1.96e-05 ***
## siteousSkyra  -6701.24     541.85 -12.367 < 2e-16 ***
## siteUB       -7402.83    1697.32 -4.361 1.29e-05 ***
## siteUCAM     -424.54     614.93 -0.690  0.49
## siteUKB      4619.96     556.07  8.308 < 2e-16 ***
## siteUmU     -14454.04     799.98 -18.068 < 2e-16 ***
## siteUOXF    -6287.82     666.18 -9.439 < 2e-16 ***
## ---
## Signif. codes:  0 '***' 0.001 '**' 0.01 '*' 0.05 '.' 0.1 ' ' 1
##
## Approximate significance of smooth terms:
##              edf Ref.df   F p-value
## t2(age_z,sleep_z) 13.1  13.1 12.45 <2e-16 ***
## ---
## Signif. codes:  0 '***' 0.001 '**' 0.01 '*' 0.05 '.' 0.1 ' ' 1
##
## R-sq.(adj) =  0.306
## lmer.REML = 1.0803e+06  Scale est. = 4.1484e+06  n = 51260

```

## Model comparison

`mod_no_sleep` refers to model without sleep term, `mod_no_interaction` refers to model with only main effect of sleep, and `mod_full` refers to model with a full interaction between age and sleep. This is a nested model comparison, and the p-value at a given line refers to comparing the model at the line to the model on the line above. Hence, significance implies that the more complicated model is supported on statistical grounds.

To be even more specific, the p-value on the second row tests whether there is an association between sleep and volume. The p-value on the third row tests whether this association depends on age.

```

## Data: NULL
## Models:
## ml$mod_no_sleep$mer: NULL
## ml$mod_no_interaction$mer: NULL
## ml$mod_full$mer: NULL
##
##              npar      AIC      BIC logLik deviance Chisq Df Pr(>Chisq)
## ml$mod_no_sleep$mer      15 1080353 1080485 -540161  1080323
## ml$mod_no_interaction$mer  17 1080294 1080445 -540130  1080260 62.498  2 2.684e-14 ***
## ml$mod_full$mer          19 1080342 1080510 -540152  1080304  0.000  2      1
## ---
## Signif. codes:  0 '***' 0.001 '**' 0.01 '*' 0.05 '.' 0.1 ' ' 1

```

We chose the model based on the likelihood ratio test with 5 % significance level, which was `mod_no_interaction`.

## Lifespan brain trajectory

The trajectory shown is from the chosen model `mod_no_interaction_no_icv`.



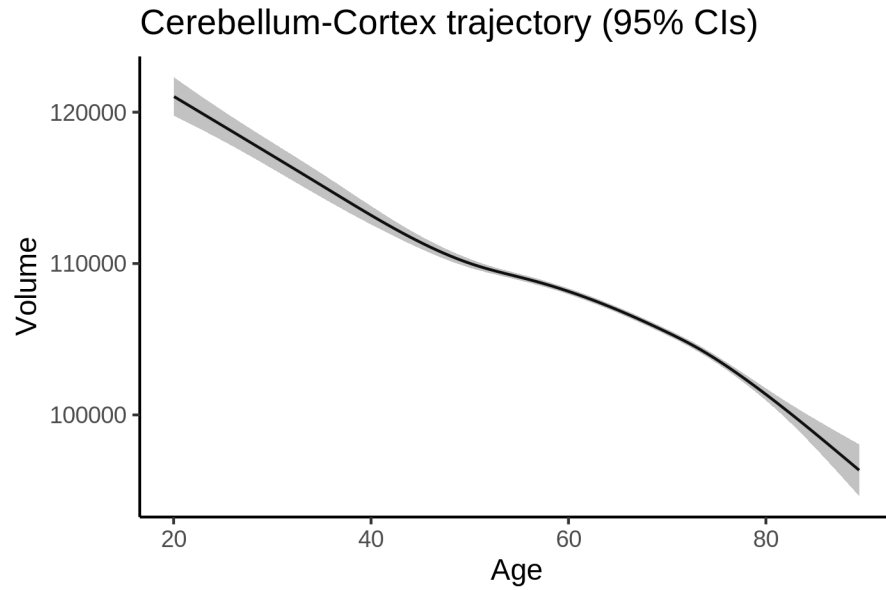

### Effect of sleep

The chosen model only included the main effect of sleep, and hence the effect does not vary with age. The black dot shows the average sleep duration across all ages in the sample.

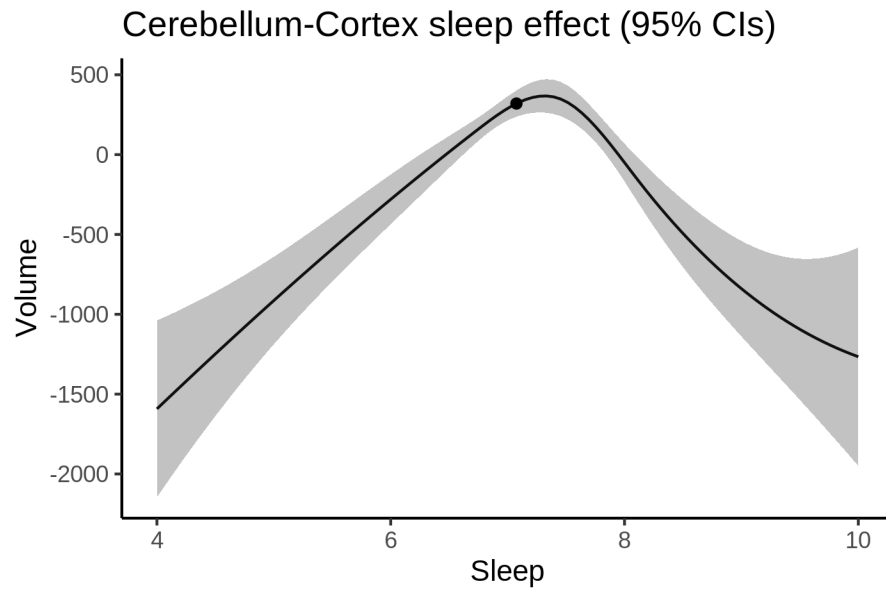

We also show the full interaction model for completeness, although it was not selected.

### Cerebellum-Cortex sleep effect (95% CIs)

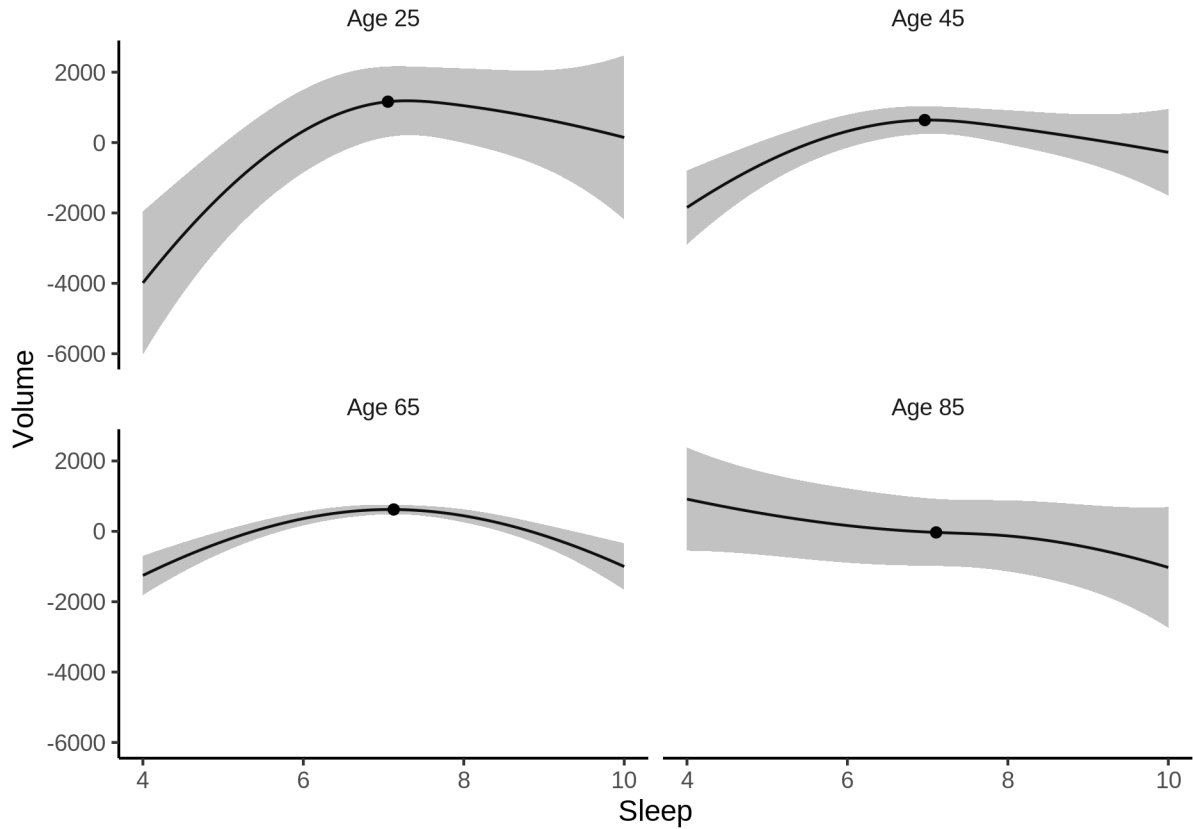

### Deviation from sleep associated with maximal volume

Model with only main effect of sleep was chosen, so we show it for all ages at once. Maximum volume is attained at 7.3 hours of sleep. The percentage values in the plot are calculated as follows: The maximum at 100 % refers to a person at an arbitrary age with a sleep duration associated with maximum volume. For a female, this volume is 109118 and for a male it is 120959. The other percentage values show how large the expected volume is for someone with other sleep durations. For example, 99 % implies a 1 % reduction.

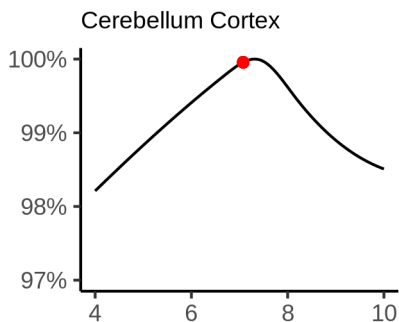

### Comparison of mean sleep and sleep associated with maximum volume

A 95 % confidence interval for the sleep associated with maximum volume is [7.21, 7.39].

The plot below compares average sleep to the sleep associated with maximum volume.

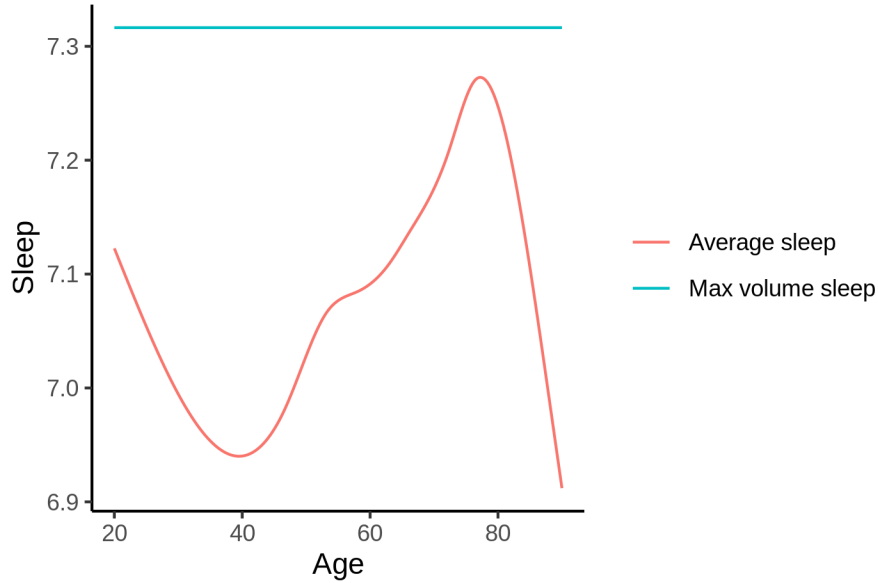

The next plot shows the difference between average sleep and sleep associated with maximum volume. The shaded region is a 95 % confidence interval.

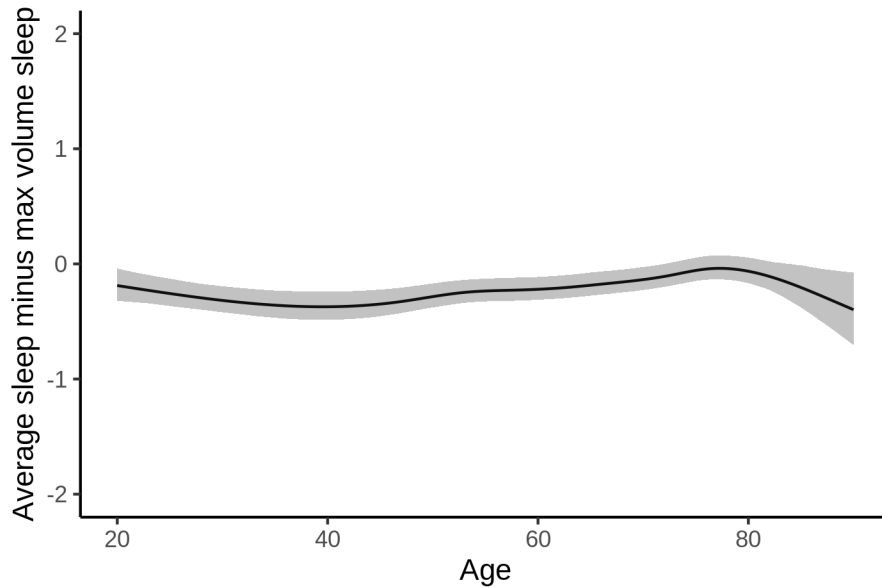

The next plot shows the probability that the sleep duration associated with maximum volume is longer than the average sleep duration, as a function of age. Probability below .05 can be interpreted as evidence that the sleep associated with maximum volume is shorter than the mean sleep, and probability above .95 can be interpreted the opposite way.

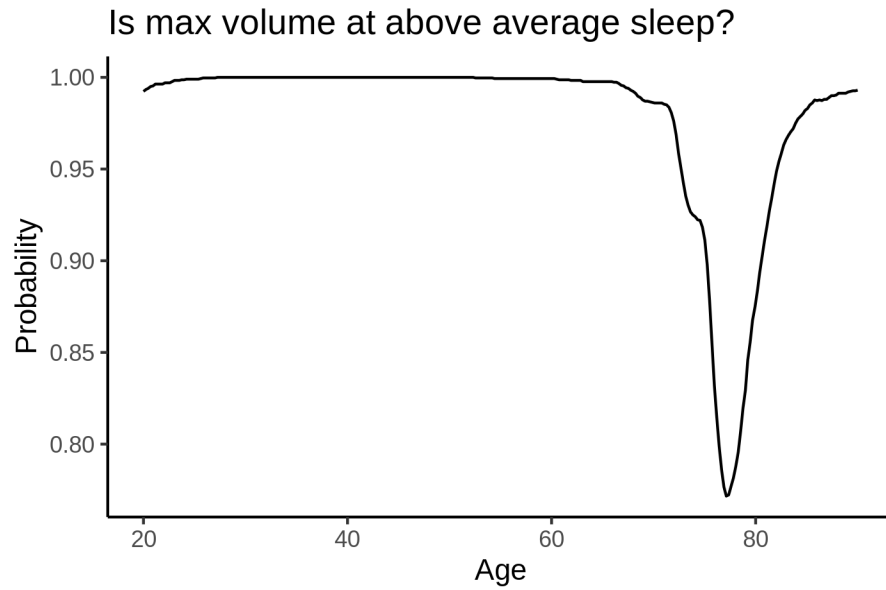

## Cerebellum-White-Matter

### Descriptive statistics

| Study | Observations | Unique IDs | Mean age | Age range |
|-------|--------------|------------|----------|-----------|
| HCP   | 974          | 974        | 28.8     | 22 - 37   |
| MPIB  | 676          | 391        | 63.2     | 24 - 83   |
| UB    | 113          | 39         | 70.9     | 64 - 81   |
| UCAM  | 884          | 632        | 55.1     | 20 - 88   |
| UiO   | 1475         | 803        | 49.4     | 20 - 89   |
| UKB   | 45957        | 43127      | 64.5     | 45 - 83   |
| UmU   | 407          | 278        | 62.2     | 25 - 85   |
| UOXF  | 769          | 769        | 69.8     | 60 - 85   |

## Spaghetti plot

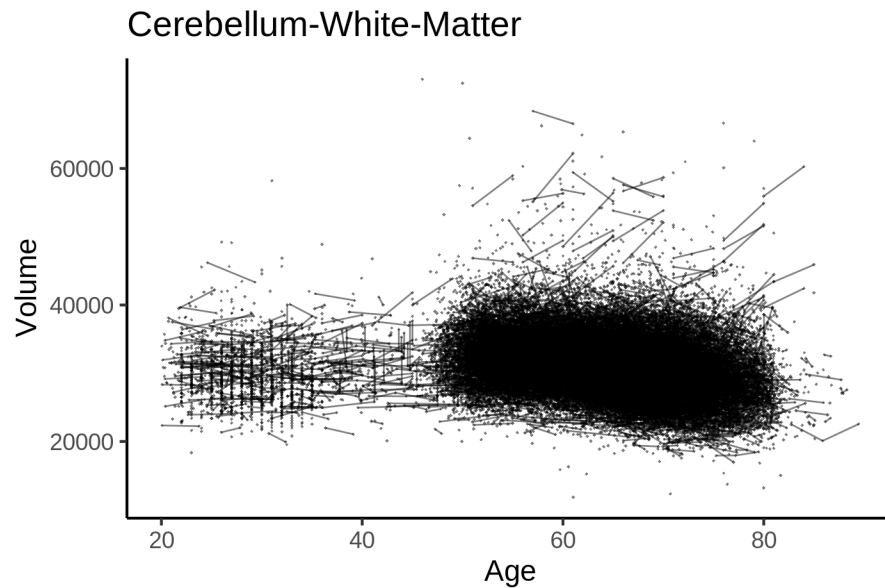

## Models Controlling for ICV

### Model outputs

Model without sleep term

```
##
## Family: gaussian
## Link function: identity
##
## Formula:
## value ~ sex + site + icv + s(age_z, k = 10, bs = "cr")
## <environment: 0x558a49c89d70>
##
## Parametric coefficients:
##              Estimate Std. Error t value Pr(>|t|)
## (Intercept)  28007.63    200.60  139.619 < 2e-16 ***
## sexmale      -326.85     40.26   -8.118 4.83e-16 ***
## siteMPIB     2453.16    252.31   9.723 < 2e-16 ***
## siteousAvanto  768.40    210.75   3.646 0.000267 ***
## siteousPrisma -905.74    352.70  -2.568 0.010232 *
## siteousSkyra  3589.32    192.91  18.606 < 2e-16 ***
## siteUB       -286.01    583.09  -0.491 0.623772
## siteUCAM     469.15    219.48   2.138 0.032560 *
## siteUKB     3267.10    205.84  15.872 < 2e-16 ***
## siteUmU     10774.80    283.42  38.017 < 2e-16 ***
## siteUOXF     786.44    242.39   3.245 0.001177 **
## icv          2067.58     20.27  102.006 < 2e-16 ***
## ---
## Signif. codes:  0 '***' 0.001 '**' 0.01 '*' 0.05 '.' 0.1 ' ' 1
##
```

```

## Approximate significance of smooth terms:
##           edf Ref.df      F p-value
## s(age_z) 7.328  7.328 610.4 <2e-16 ***
## ---
## Signif. codes:  0 '***' 0.001 '**' 0.01 '*' 0.05 '.' 0.1 ' ' 1
##
## R-sq.(adj) =  0.324
## lmer.REML = 9.7747e+05  Scale est. = 1.6189e+06  n = 51255

Model with only main effects of age and sleep

##
## Family: gaussian
## Link function: identity
##
## Formula:
## value ~ sex + site + icv + s(age_z, k = 10, bs = "cr") + s(sleep_z,
##           k = 5, bs = "cr")
## <environment: 0x558a49c89d70>
##
## Parametric coefficients:
##           Estimate Std. Error t value Pr(>|t|)
## (Intercept) 27975.86    200.74 139.363 < 2e-16 ***
## sexmale      -328.56     40.25  -8.162 3.37e-16 ***
## siteMPIB     2492.98    252.43   9.876 < 2e-16 ***
## siteousAvanto  783.06    210.77   3.715 0.000203 ***
## siteousPrisma -896.33    352.65  -2.542 0.011034 *
## siteousSkyra  3604.01    192.94  18.680 < 2e-16 ***
## siteUB       -269.59    582.96  -0.462 0.643761
## siteUCAM      489.63    219.47   2.231 0.025690 *
## siteUKB      3301.09    206.00  16.024 < 2e-16 ***
## siteUmU     10856.72    284.02  38.225 < 2e-16 ***
## siteUOXF      803.25    242.36   3.314 0.000919 ***
## icv          2068.89     20.28 102.000 < 2e-16 ***
## ---
## Signif. codes:  0 '***' 0.001 '**' 0.01 '*' 0.05 '.' 0.1 ' ' 1
##
## Approximate significance of smooth terms:
##           edf Ref.df      F p-value
## s(age_z)   7.308  7.308 601.751 < 2e-16 ***
## s(sleep_z) 2.060  2.060  9.969 4.46e-05 ***
## ---
## Signif. codes:  0 '***' 0.001 '**' 0.01 '*' 0.05 '.' 0.1 ' ' 1
##
## R-sq.(adj) =  0.325
## lmer.REML = 9.7746e+05  Scale est. = 1.6186e+06  n = 51255

Model with full interaction between age and sleep

##
## Family: gaussian
## Link function: identity
##
## Formula:
## value ~ sex + site + icv + t2(age_z, sleep_z, k = c(10, 4), bs = "cr")
## <environment: 0x558a49c89d70>

```

```

##
## Parametric coefficients:
##           Estimate Std. Error t value Pr(>|t|)
## (Intercept) 27946.47   201.59 138.634 < 2e-16 ***
## sexmale     -330.97    40.34  -8.204 2.38e-16 ***
## siteMPIB    2522.62   253.85   9.937 < 2e-16 ***
## siteousAvanto 808.71   211.85   3.817 0.000135 ***
## siteousPrisma -874.96   353.41  -2.476 0.013297 *
## siteousSkyra 3633.89   194.20  18.712 < 2e-16 ***
## siteUB      -245.32   583.39  -0.421 0.674121
## siteUCAM     522.66   220.77   2.367 0.017913 *
## siteUKB     3332.16   206.85  16.109 < 2e-16 ***
## siteUmU     10882.59  285.02  38.181 < 2e-16 ***
## siteUOXF     838.70   243.31   3.447 0.000567 ***
## icv         2069.54    20.28 102.041 < 2e-16 ***
## ---
## Signif. codes:  0 '***' 0.001 '**' 0.01 '*' 0.05 '.' 0.1 ' ' 1
##
## Approximate significance of smooth terms:
##           edf Ref.df    F p-value
## t2(age_z,sleep_z) 12.85 12.85 7.989 <2e-16 ***
## ---
## Signif. codes:  0 '***' 0.001 '**' 0.01 '*' 0.05 '.' 0.1 ' ' 1
##
## R-sq.(adj) = 0.325
## lmer.REML = 9.7746e+05 Scale est. = 1.6184e+06 n = 51255

```

## Model comparison

mod\_no\_sleep refers to model without sleep term, mod\_no\_interaction refers to model with only main effect of sleep, and mod\_full refers to model with a full interaction between age and sleep. This is a nested model comparison, and the p-value at a given line refers to comparing the model at the line to the model on the line above. Hence, significance implies that the more complicated model is supported on statistical grounds.

To be even more specific, the p-value on the second row tests whether there is an association between sleep and volume. The p-value on the third row tests whether this association depends on age.

```

## Data: NULL
## Models:
## ml$mod_no_sleep$mer: NULL
## ml$mod_no_interaction$mer: NULL
## ml$mod_full$mer: NULL
##           npar    AIC    BIC logLik deviance Chisq Df Pr(>Chisq)
## ml$mod_no_sleep$mer      16 977504 977646 -488736 977472
## ml$mod_no_interaction$mer 18 977491 977650 -488728 977455 17.453 2 0.0001622 ***
## ml$mod_full$mer          20 977499 977676 -488730 977459 0.000 2 1.0000000
## ---
## Signif. codes:  0 '***' 0.001 '**' 0.01 '*' 0.05 '.' 0.1 ' ' 1

```

We chose the model based on the likelihood ratio test with 5 % significance level, which was mod\_no\_interaction.

### Lifespan brain trajectory

The trajectory shown is from the chosen model `mod_no_interaction`.

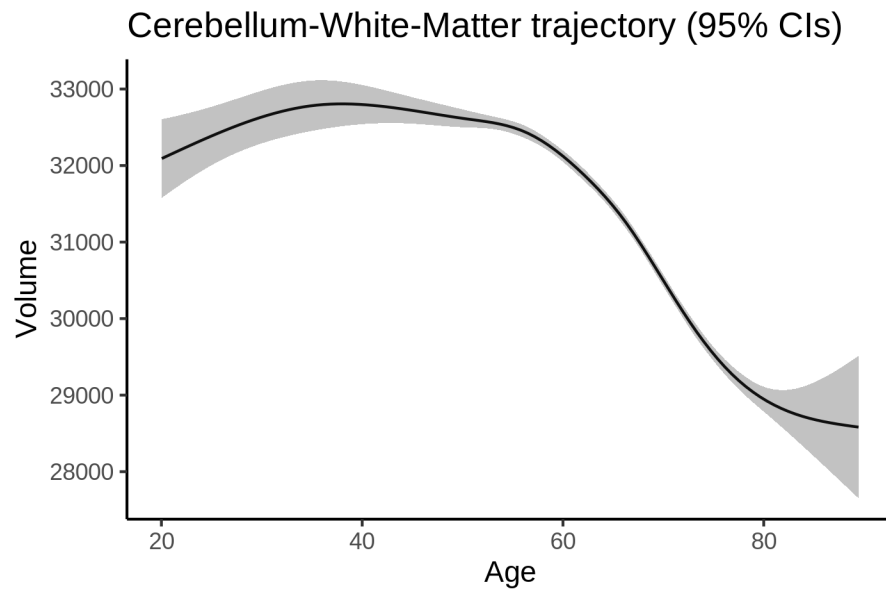

### Effect of sleep

The chosen model only included the main effect of sleep, and hence the effect does not vary with age. The black dot shows the average sleep duration across all ages in the sample.

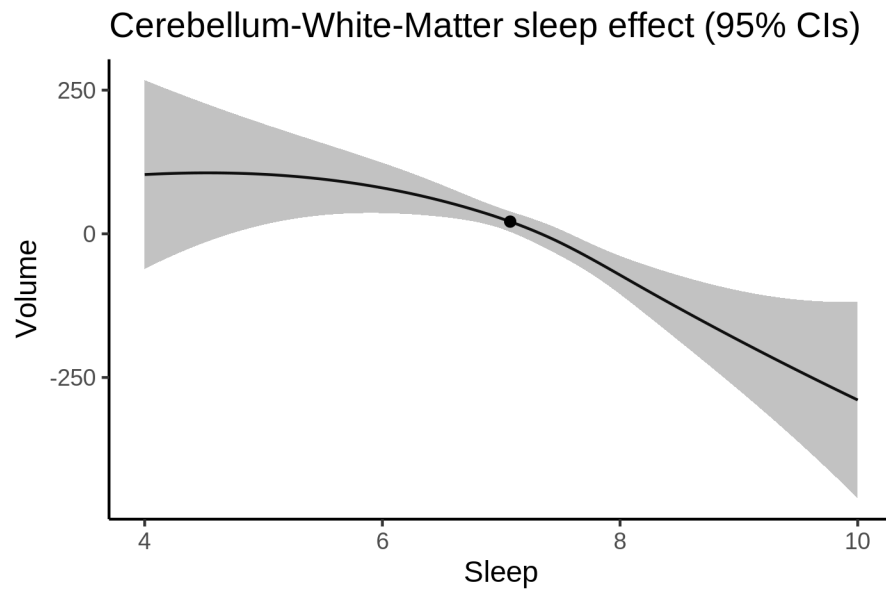

We also show the full interaction model for completeness, although it was not selected.



### Cerebellum-White-Matter sleep effect (95% CIs)

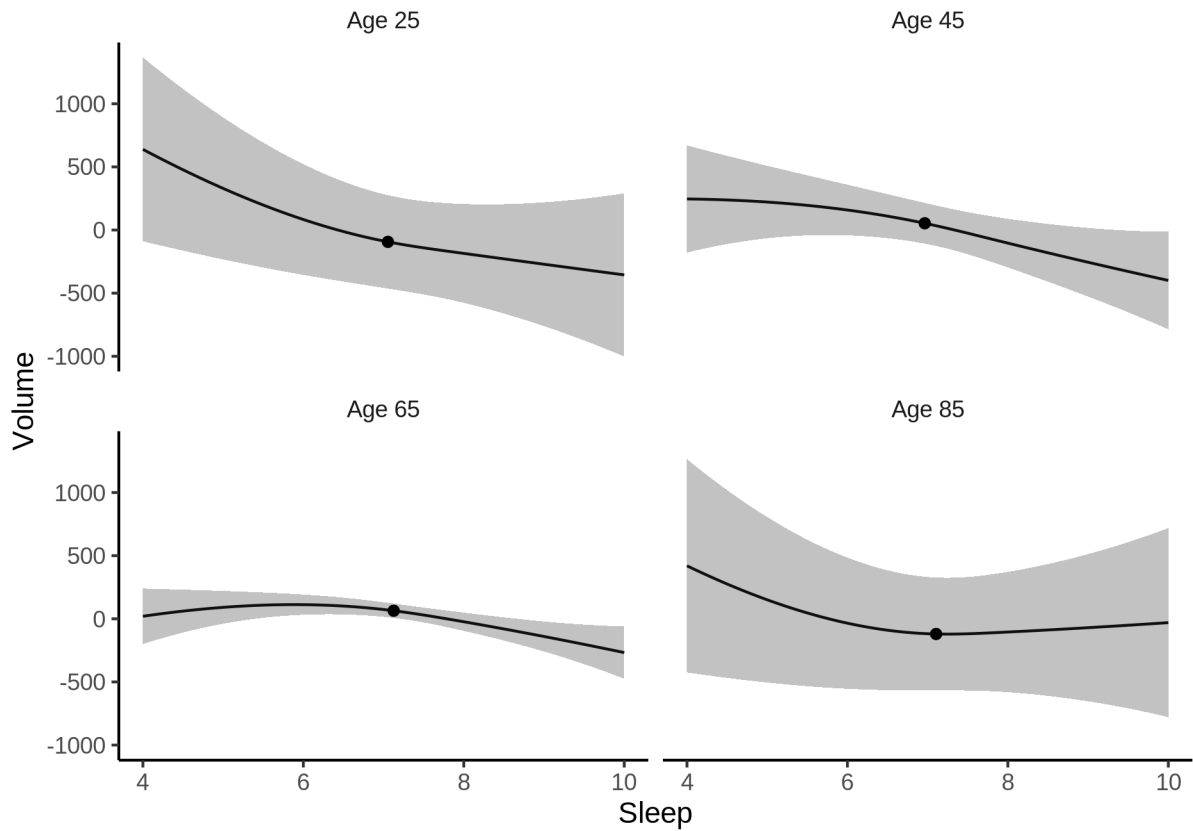

### Deviation from sleep associated with maximal volume

Model with only main effect of sleep was chosen, so we show it for all ages at once. Maximum volume is attained at 4.5 hours of sleep. The percentage values in the plot are calculated as follows: The maximum at 100 % refers to a person at an arbitrary age with a sleep duration associated with maximum volume. For a female, this volume is 31423 and for a male it is 31095. The other percentage values show how large the expected volume is for someone with other sleep durations. For example, 99 % implies a 1 % reduction.

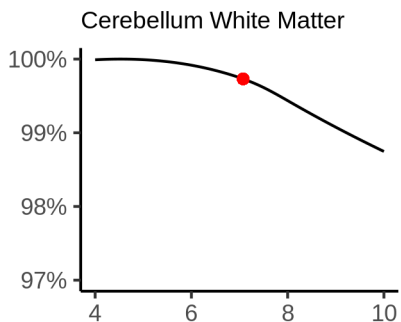

### Comparison of mean sleep and sleep associated with maximum volume

A 95 % confidence interval for the sleep associated with maximum volume is [4, 6.06].

The plot below compares average sleep to the sleep associated with maximum volume.

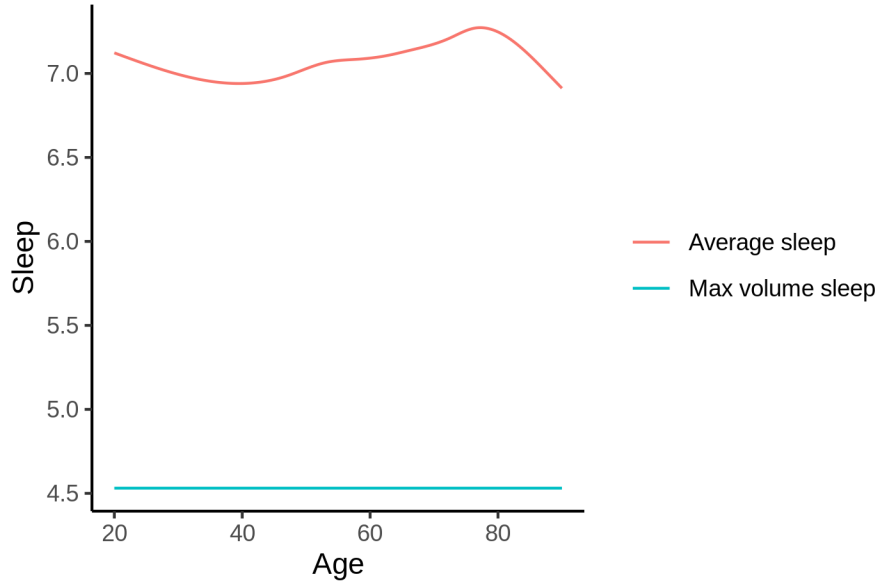

The next plot shows the difference between average sleep and sleep associated with maximum volume. The shaded region is a 95 % confidence interval.

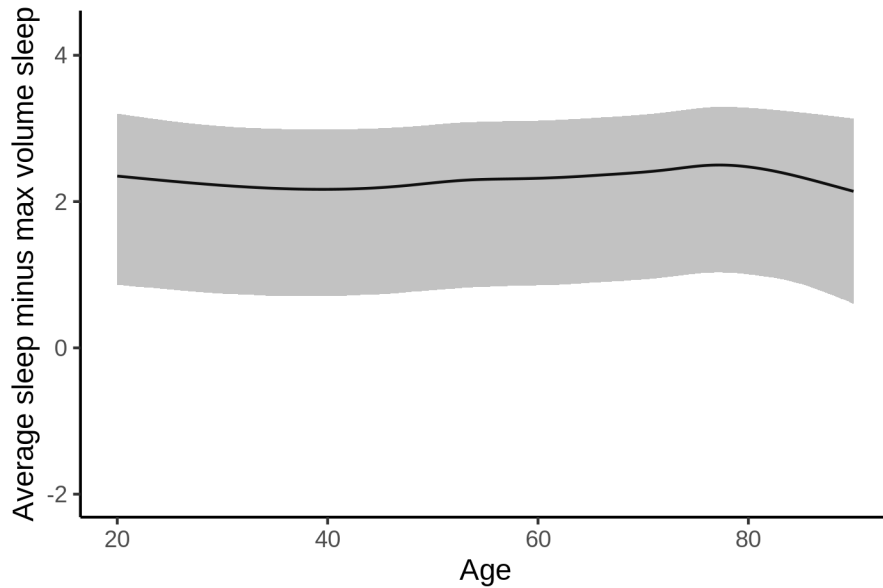

The next plot shows the probability that the sleep duration associated with maximum volume is longer than the average sleep duration, as a function of age. Probability below .05 can be interpreted as evidence that the sleep associated with maximum volume is shorter than the mean sleep, and probability above .95 can be interpreted the opposite way.

## Is max volume at above average sleep?

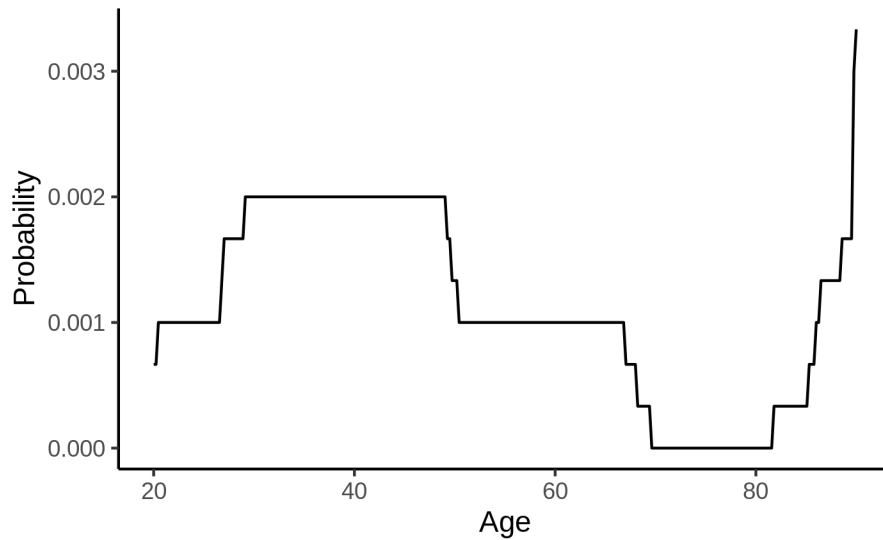

## Controlling for covariates

Below is the output for a model in which we only include data with income and education.

```
##
## Family: gaussian
## Link function: identity
##
## Formula:
## value ~ sex + site + s(age_z, k = 10, bs = "cr") + s(sleep_z,
##   k = 5, bs = "cr") + icv
## <environment: 0x558ad757b790>
##
## Parametric coefficients:
##               Estimate Std. Error t value Pr(>|t|)
## (Intercept)  30837.74   454.76   67.811 < 2e-16 ***
## sexmale      -409.89    50.22   -8.163 3.40e-16 ***
## siteousAvanto -3033.27   573.54  -5.289 1.24e-07 ***
## siteousPrisma -3764.78   562.38  -6.694 2.20e-11 ***
## siteousSkyra   547.36    491.22   1.114 0.26517
## siteUKB        462.96    454.05   1.020 0.30791
## siteUOXF      -1362.15   511.55  -2.663 0.00775 **
## icv           2150.91    25.83   83.270 < 2e-16 ***
## ---
## Signif. codes:  0 '***' 0.001 '**' 0.01 '*' 0.05 '.' 0.1 ' ' 1
##
## Approximate significance of smooth terms:
##               edf Ref.df      F p-value
## s(age_z)      6.400  6.400 423.807 < 2e-16 ***
## s(sleep_z)    2.694  2.694   6.072 0.000664 ***
## ---
## Signif. codes:  0 '***' 0.001 '**' 0.01 '*' 0.05 '.' 0.1 ' ' 1
##
```

```
## R-sq.(adj) = 0.303
## lmer.REML = 5.9336e+05 Scale est. = 1.6984e+06 n = 31179
```

Below is the output for a model in which we control for the main effects of income and education.

```
##
## Family: gaussian
## Link function: identity
##
## Formula:
## value ~ sex + site + s(age_z, k = 10, bs = "cr") + s(sleep_z,
##     k = 5, bs = "cr") + icv + income_scaled + education_scaled
## <environment: 0x558ad757b790>
##
## Parametric coefficients:
##           Estimate Std. Error t value Pr(>|t|)
## (Intercept)  30635.97    457.64  66.943 < 2e-16 ***
## sexmale      -407.59     50.35  -8.095 5.94e-16 ***
## siteousAvanto -3044.18    573.56  -5.308 1.12e-07 ***
## siteousPrisma -3790.45    562.29  -6.741 1.60e-11 ***
## siteousSkyra   535.21    491.23   1.090 0.27593
## siteUKB       457.44    454.17   1.007 0.31385
## siteUOXF     -1301.09    511.70  -2.543 0.01100 *
## icv          2138.26     26.04  82.101 < 2e-16 ***
## income_scaled  103.74     59.91   1.732 0.08333 .
## education_scaled 201.71     70.66   2.855 0.00431 **
## ---
## Signif. codes:  0 '***' 0.001 '**' 0.01 '*' 0.05 '.' 0.1 ' ' 1
##
## Approximate significance of smooth terms:
##           edf Ref.df      F p-value
## s(age_z)   6.355  6.355 380.965 < 2e-16 ***
## s(sleep_z) 2.449  2.449   6.306 0.000783 ***
## ---
## Signif. codes:  0 '***' 0.001 '**' 0.01 '*' 0.05 '.' 0.1 ' ' 1
##
## R-sq.(adj) = 0.304
## lmer.REML = 5.9333e+05 Scale est. = 1.6988e+06 n = 31179
```

We also included interaction effects between sleep duration and education and income, in another model. The output is shown below, and the interaction terms are `income_scaled:sleep_z` and `education_scaled:sleep_z`.

```
##
## Family: gaussian
## Link function: identity
##
## Formula:
## value ~ sex + site + s(age_z, k = 10, bs = "cr") + s(sleep_z,
##     k = 5, bs = "cr") + icv + income_scaled + education_scaled +
##     income_scaled:sleep_z + education_scaled:sleep_z
## <environment: 0x558ad757b790>
##
## Parametric coefficients:
##           Estimate Std. Error t value Pr(>|t|)
## (Intercept)  30644.43    457.66  66.959 < 2e-16 ***
```

```

## sexmale                -410.16      50.39  -8.140 4.09e-16 ***
## siteousAvanto          -3052.49     573.55  -5.322 1.03e-07 ***
## siteousPrisma          -3805.89     562.33  -6.768 1.33e-11 ***
## siteousSkyra           527.13      491.23   1.073 0.28325
## siteUKB                 447.61      454.20   0.985 0.32440
## siteUOXF               -1316.26     511.82  -2.572 0.01012 *
## icv                     2138.89      26.05  82.119 < 2e-16 ***
## income_scaled           105.96      59.94   1.768 0.07713 .
## education_scaled        199.38      70.67   2.821 0.00478 **
## income_scaled:sleep_z   -47.60      59.50  -0.800 0.42373
## education_scaled:sleep_z 131.74      68.57   1.921 0.05470 .
## ---
## Signif. codes:  0 '***' 0.001 '**' 0.01 '*' 0.05 '.' 0.1 ' ' 1
##
## Approximate significance of smooth terms:
##          edf Ref.df      F p-value
## s(age_z)  6.349  6.349 380.679 < 2e-16 ***
## s(sleep_z) 2.536  2.536   4.063 0.00947 **
## ---
## Signif. codes:  0 '***' 0.001 '**' 0.01 '*' 0.05 '.' 0.1 ' ' 1
##
## R-sq.(adj) =  0.304
## lmer.REML = 5.933e+05  Scale est. = 1.6988e+06  n = 31179

```

We did the same controlling for BMI. Below is the model with no covariates but only keeping data with BMI.

```

##
## Family: gaussian
## Link function: identity
##
## Formula:
## value ~ sex + site + s(age_z, k = 10, bs = "cr") + s(sleep_z,
##          k = 5, bs = "cr") + icv
## <environment: 0x558ad923f0e8>
##
## Parametric coefficients:
##          Estimate Std. Error t value Pr(>|t|)
## (Intercept) 29123.37    376.69  77.313 < 2e-16 ***
## sexmale      -456.22     50.32  -9.066 < 2e-16 ***
## siteousPrisma -1686.88    480.76  -3.509 0.000451 ***
## siteousSkyra  2851.11    323.58   8.811 < 2e-16 ***
## siteUCAM      -429.40    391.11  -1.098 0.272260
## siteUKB       2190.09    379.10   5.777 7.67e-09 ***
## siteUmU       9969.42    429.41  23.216 < 2e-16 ***
## icv           2182.75     25.97  84.063 < 2e-16 ***
## ---
## Signif. codes:  0 '***' 0.001 '**' 0.01 '*' 0.05 '.' 0.1 ' ' 1
##
## Approximate significance of smooth terms:
##          edf Ref.df      F p-value
## s(age_z)  7.237  7.237 367.765 < 2e-16 ***
## s(sleep_z) 2.037  2.037   6.878 0.000926 ***
## ---
## Signif. codes:  0 '***' 0.001 '**' 0.01 '*' 0.05 '.' 0.1 ' ' 1
##

```

```
## R-sq.(adj) = 0.309
## lmer.REML = 6.3794e+05 Scale est. = 1.7505e+06 n = 33428
```

Below is the model output with main effect.

```
##
## Family: gaussian
## Link function: identity
##
## Formula:
## value ~ sex + site + s(age_z, k = 10, bs = "cr") + s(sleep_z,
##     k = 5, bs = "cr") + icv + bmi
## <environment: 0x558ad923f0e8>
##
## Parametric coefficients:
##           Estimate Std. Error t value Pr(>|t|)
## (Intercept) 30342.89   396.07  76.610 < 2e-16 ***
## sexmale      -417.76    50.40  -8.290 < 2e-16 ***
## siteousPrisma -1629.25  480.36  -3.392 0.000695 ***
## siteousSkyra  2862.95   323.50   8.850 < 2e-16 ***
## siteUCAM     -398.20   390.82  -1.019 0.308265
## siteUKB      2231.40   378.85   5.890 3.9e-09 ***
## siteUmU      10025.16  429.06  23.365 < 2e-16 ***
## icv          2190.64    25.93  84.491 < 2e-16 ***
## bmi          -48.50     4.89  -9.918 < 2e-16 ***
## ---
## Signif. codes:  0 '***' 0.001 '**' 0.01 '*' 0.05 '.' 0.1 ' ' 1
##
## Approximate significance of smooth terms:
##           edf Ref.df      F p-value
## s(age_z)   7.242  7.242 371.46 < 2e-16 ***
## s(sleep_z) 1.402  1.402  12.25 0.000383 ***
## ---
## Signif. codes:  0 '***' 0.001 '**' 0.01 '*' 0.05 '.' 0.1 ' ' 1
##
## R-sq.(adj) = 0.311
## lmer.REML = 6.3784e+05 Scale est. = 1.7502e+06 n = 33428
```

Next is the model with BMI-sleep interaction.

```
##
## Family: gaussian
## Link function: identity
##
## Formula:
## value ~ sex + site + s(age_z, k = 10, bs = "cr") + s(sleep_z,
##     k = 5, bs = "cr") + icv + bmi + bmi:sleep_z
## <environment: 0x558ad923f0e8>
##
## Parametric coefficients:
##           Estimate Std. Error t value Pr(>|t|)
## (Intercept) 30337.329   396.221  76.567 < 2e-16 ***
## sexmale      -417.583    50.397  -8.286 < 2e-16 ***
## siteousPrisma -1628.690  480.366  -3.391 0.000698 ***
## siteousSkyra  2864.400   323.509   8.854 < 2e-16 ***
## siteUCAM     -396.501   390.853  -1.014 0.310375
```

```

## siteUKB      2235.141    378.880    5.899 3.68e-09 ***
## siteUmU      10026.875    429.087    23.368 < 2e-16 ***
## icv          2191.119     25.921    84.529 < 2e-16 ***
## bmi          -48.488      4.890    -9.916 < 2e-16 ***
## bmi:sleep_z    2.963      4.628     0.640 0.522039
## ---
## Signif. codes:  0 '***' 0.001 '**' 0.01 '*' 0.05 '.' 0.1 ' ' 1
##
## Approximate significance of smooth terms:
##          edf Ref.df      F p-value
## s(age_z)  7.245  7.245 372.06 <2e-16 ***
## s(sleep_z) 1.000  1.000   1.65  0.199
## ---
## Signif. codes:  0 '***' 0.001 '**' 0.01 '*' 0.05 '.' 0.1 ' ' 1
##
## R-sq.(adj) =  0.311
## lmer.REML = 6.3783e+05  Scale est. = 1.7502e+06  n = 33428

```

We did the same controlling for depression. Below is the model with no covariates but only keeping data with depression.

```

##
## Family: gaussian
## Link function: identity
##
## Formula:
## value ~ sex + site + s(age_z, k = 10, bs = "cr") + s(sleep_z,
##           k = 5, bs = "cr") + icv
## <environment: 0x558ad80e6430>
##
## Parametric coefficients:
##              Estimate Std. Error t value Pr(>|t|)
## (Intercept)  29743.85    236.40 125.818 < 2e-16 ***
## sexmale      -439.89     50.51  -8.710 < 2e-16 ***
## siteousAvanto -269.42    585.92  -0.460 0.645650
## siteousPrisma -1610.45   467.68  -3.443 0.000575 ***
## siteousSkyra  2972.65    362.61   8.198 2.53e-16 ***
## siteUCAM     -1350.52   325.14  -4.154 3.28e-05 ***
## siteUKB       1540.93   233.71   6.593 4.37e-11 ***
## siteUmU       9346.59   318.37  29.358 < 2e-16 ***
## icv          2159.80    26.02  83.006 < 2e-16 ***
## ---
## Signif. codes:  0 '***' 0.001 '**' 0.01 '*' 0.05 '.' 0.1 ' ' 1
##
## Approximate significance of smooth terms:
##          edf Ref.df      F p-value
## s(age_z)  7.046  7.046 368.904 < 2e-16 ***
## s(sleep_z) 2.068  2.068   6.073 0.00193 **
## ---
## Signif. codes:  0 '***' 0.001 '**' 0.01 '*' 0.05 '.' 0.1 ' ' 1
##
## R-sq.(adj) =  0.319
## lmer.REML = 6.3601e+05  Scale est. = 1.702e+06  n = 33340

```

Below is the model output with main effect.

```

##
## Family: gaussian
## Link function: identity
##
## Formula:
## value ~ sex + site + s(age_z, k = 10, bs = "cr") + s(sleep_z,
##     k = 5, bs = "cr") + icv + depression
## <environment: 0x558ad80e6430>
##
## Parametric coefficients:
##           Estimate Std. Error t value Pr(>|t|)
## (Intercept) 29839.51   237.39 125.699 < 2e-16 ***
## sexmale      -449.62    50.54  -8.896 < 2e-16 ***
## siteousAvanto -221.06   585.99  -0.377 0.705991
## siteousPrisma -1566.76   467.68  -3.350 0.000809 ***
## siteousSkyra  3028.34   362.76   8.348 < 2e-16 ***
## siteUCAM     -1329.01   325.10  -4.088 4.36e-05 ***
## siteUKB       1501.22   233.83   6.420 1.38e-10 ***
## siteUmU       9634.00   325.15  29.630 < 2e-16 ***
## icv           2161.30    26.01  83.097 < 2e-16 ***
## depression   -777.89   179.77  -4.327 1.51e-05 ***
## ---
## Signif. codes:  0 '***' 0.001 '**' 0.01 '*' 0.05 '.' 0.1 ' ' 1
##
## Approximate significance of smooth terms:
##           edf Ref.df      F p-value
## s(age_z)   7.062  7.062 370.757 < 2e-16 ***
## s(sleep_z) 1.661  1.661   9.159 0.00191 **
## ---
## Signif. codes:  0 '***' 0.001 '**' 0.01 '*' 0.05 '.' 0.1 ' ' 1
##
## R-sq.(adj) =  0.319
## lmer.REML = 6.3598e+05  Scale est. = 1.7023e+06  n = 33340

```

Next is the model with depression-sleep interaction.

```

##
## Family: gaussian
## Link function: identity
##
## Formula:
## value ~ sex + site + s(age_z, k = 10, bs = "cr") + s(sleep_z,
##     k = 5, bs = "cr") + icv + depression + depression:sleep_z
## <environment: 0x558ad80e6430>
##
## Parametric coefficients:
##           Estimate Std. Error t value Pr(>|t|)
## (Intercept) 29839.14   237.38 125.700 < 2e-16 ***
## sexmale      -448.42    50.55  -8.871 < 2e-16 ***
## siteousAvanto -211.74   586.03  -0.361 0.717866
## siteousPrisma -1557.13   467.71  -3.329 0.000872 ***
## siteousSkyra  3037.66   362.80   8.373 < 2e-16 ***
## siteUCAM     -1320.15   325.15  -4.060 4.92e-05 ***
## siteUKB       1501.48   233.82   6.422 1.37e-10 ***
## siteUmU       9576.41   327.81  29.214 < 2e-16 ***

```



```

## icv                2161.38      26.01  83.111 < 2e-16 ***
## depression         -767.19     179.79  -4.267 1.99e-05 ***
## depression:sleep_z  183.62     131.12   1.400 0.161400
## ---
## Signif. codes:  0 '***' 0.001 '**' 0.01 '*' 0.05 '.' 0.1 ' ' 1
##
## Approximate significance of smooth terms:
##          edf Ref.df    F  p-value
## s(age_z)  7.057  7.057 371.40 < 2e-16 ***
## s(sleep_z) 1.406  1.406  11.47 0.000745 ***
## ---
## Signif. codes:  0 '***' 0.001 '**' 0.01 '*' 0.05 '.' 0.1 ' ' 1
##
## R-sq.(adj) =  0.319
## lmer.REML = 6.3597e+05  Scale est. = 1.7024e+06  n = 33340

```

The plot below shows the sleep-volume curve for the original model and for the model with main effects of SES.

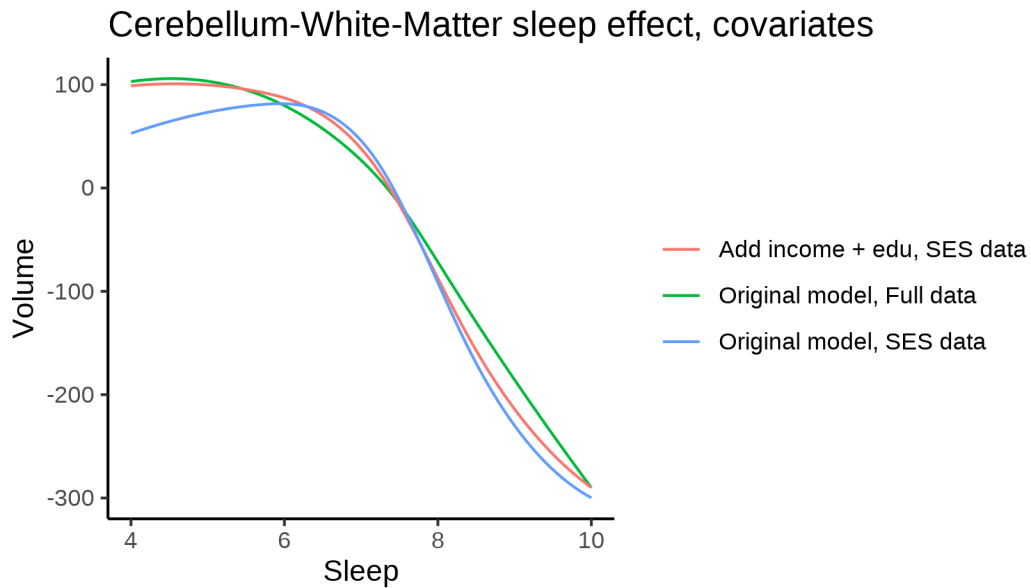

The plot below shows the sleep-volume curve for the original model and for the model with main effects of BMI.

### Cerebellum-White-Matter sleep effect, covariates

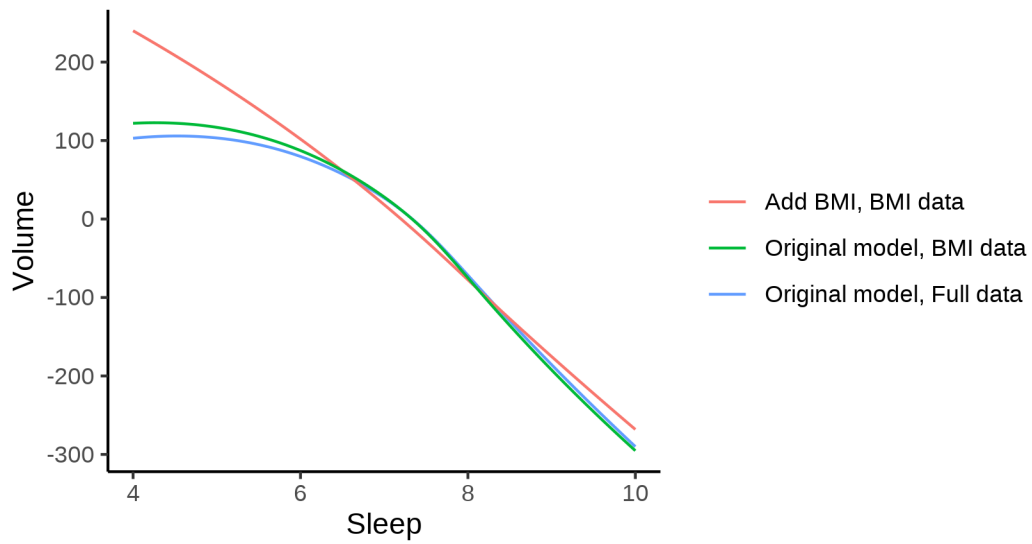

The plot below shows the sleep-volume curve for the original model and for the model with main effects of depression.

### Cerebellum-White-Matter sleep effect, covariates

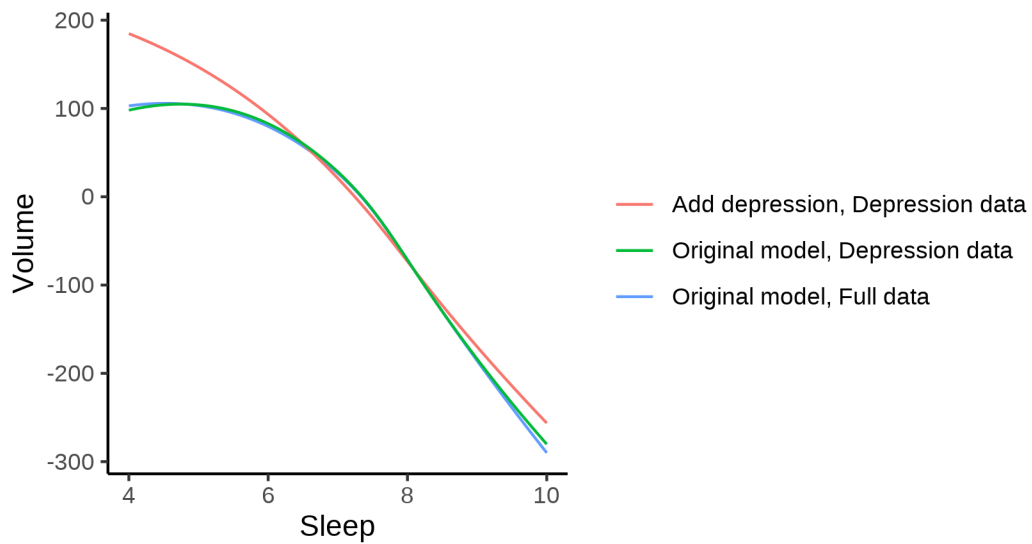

## Models Not controlling for ICV

### Model outputs

Model without sleep term

```
##  
## Family: gaussian  
## Link function: identity  
##  
## Formula:
```

```

## value ~ sex + site + s(age_z, k = 10, bs = "cr")
## <environment: 0x55589589b2b80>
##
## Parametric coefficients:
##           Estimate Std. Error t value Pr(>|t|)
## (Intercept)  26860.8    220.1 122.053 < 2e-16 ***
## sexmale      2018.5     36.5  55.307 < 2e-16 ***
## siteMPIB     -850.3    276.3  -3.078  0.00209 **
## siteousAvanto 1703.3    228.8   7.444 9.96e-14 ***
## siteousPrisma -583.6    385.8  -1.513  0.13036
## siteousSkyra  3754.9    212.6  17.665 < 2e-16 ***
## siteUB       -886.9    647.4  -1.370  0.17072
## siteUCAM      595.4    242.0   2.461  0.01387 *
## siteUKB      3341.1    226.2  14.773 < 2e-16 ***
## siteUmU      9931.9    312.6  31.771 < 2e-16 ***
## siteUOXF     314.8    266.7   1.181  0.23776
## ---
## Signif. codes:  0 '***' 0.001 '**' 0.01 '*' 0.05 '.' 0.1 ' ' 1
##
## Approximate significance of smooth terms:
##           edf Ref.df      F p-value
## s(age_z)  7.404  7.404 633.5 <2e-16 ***
## ---
## Signif. codes:  0 '***' 0.001 '**' 0.01 '*' 0.05 '.' 0.1 ' ' 1
##
## R-sq.(adj) =  0.177
## lmer.REML = 9.8688e+05  Scale est. = 1.6472e+06  n = 51255

```

Model with only main effects of age and sleep

```

##
## Family: gaussian
## Link function: identity
##
## Formula:
## value ~ sex + site + s(age_z, k = 10, bs = "cr") + s(sleep_z,
##           k = 5, bs = "cr")
## <environment: 0x55589589b2b80>
##
## Parametric coefficients:
##           Estimate Std. Error t value Pr(>|t|)
## (Intercept) 26874.23    220.27 122.006 < 2e-16 ***
## sexmale     2012.49     36.51  55.126 < 2e-16 ***
## siteMPIB    -833.11    276.33  -3.015  0.00257 **
## siteousAvanto 1688.64    228.86   7.379 1.62e-13 ***
## siteousPrisma -594.44    385.68  -1.541  0.12325
## siteousSkyra  3738.34    212.59  17.585 < 2e-16 ***
## siteUB      -860.70    647.20  -1.330  0.18357
## siteUCAM     605.36    241.94   2.502  0.01235 *
## siteUKB     3329.61    226.36  14.709 < 2e-16 ***
## siteUmU     9961.54    313.23  31.802 < 2e-16 ***
## siteUOXF     311.34    266.62   1.168  0.24291
## ---
## Signif. codes:  0 '***' 0.001 '**' 0.01 '*' 0.05 '.' 0.1 ' ' 1
##

```

```

## Approximate significance of smooth terms:
##           edf Ref.df      F p-value
## s(age_z)  7.398  7.398 621.325 < 2e-16 ***
## s(sleep_z) 3.453  3.453  9.445 1.86e-06 ***
## ---
## Signif. codes:  0 '***' 0.001 '**' 0.01 '*' 0.05 '.' 0.1 ' ' 1
##
## R-sq.(adj) =  0.178
## lmer.REML = 9.8686e+05  Scale est. = 1.647e+06  n = 51255

Model with full interaction between age and sleep

##
## Family: gaussian
## Link function: identity
##
## Formula:
## value ~ sex + site + t2(age_z, sleep_z, k = c(10, 4), bs = "cr")
## <environment: 0x5589589b2b80>
##
## Parametric coefficients:
##           Estimate Std. Error t value Pr(>|t|)
## (Intercept) 26852.13    221.56 121.195 < 2e-16 ***
## sexmale      2016.99     36.59  55.120 < 2e-16 ***
## siteMPIB     -842.90    278.05  -3.031 0.00243 **
## siteousAvanto 1711.18    230.22   7.433 1.08e-13 ***
## siteousPrisma -582.80    386.63  -1.507 0.13172
## siteousSkyra  3764.14    214.13  17.579 < 2e-16 ***
## siteUB       -884.97    647.91  -1.366 0.17198
## siteUCAM      604.70    243.55   2.483 0.01304 *
## siteUKB      3350.78    227.66  14.718 < 2e-16 ***
## siteUmU      9958.59    314.54  31.661 < 2e-16 ***
## siteUOXF      320.78    267.99   1.197 0.23132
## ---
## Signif. codes:  0 '***' 0.001 '**' 0.01 '*' 0.05 '.' 0.1 ' ' 1
##
## Approximate significance of smooth terms:
##           edf Ref.df      F p-value
## t2(age_z,sleep_z) 13.56  13.56  5.723 <2e-16 ***
## ---
## Signif. codes:  0 '***' 0.001 '**' 0.01 '*' 0.05 '.' 0.1 ' ' 1
##
## R-sq.(adj) =  0.178
## lmer.REML = 9.8688e+05  Scale est. = 1.6473e+06  n = 51255

```

## Model comparison

`mod_no_sleep` refers to model without sleep term, `mod_no_interaction` refers to model with only main effect of sleep, and `mod_full` refers to model with a full interaction between age and sleep. This is a nested model comparison, and the p-value at a given line refers to comparing the model at the line to the model on the line above. Hence, significance implies that the more complicated model is supported on statistical grounds.

To be even more specific, the p-value on the second row tests whether there is an association between sleep and volume. The p-value on the third row tests whether this association depends on age.

```
## Data: NULL
## Models:
## ml$mod_no_sleep$mer: NULL
## ml$mod_no_interaction$mer: NULL
## ml$mod_full$mer: NULL
##
##          npar    AIC    BIC logLik deviance Chisq Df Pr(>Chisq)
## ml$mod_no_sleep$mer      15 986914 987047 -493442    986884
## ml$mod_no_interaction$mer 17 986892 987043 -493429    986858 25.985  2 2.277e-06 ***
## ml$mod_full$mer          19 986915 987083 -493439    986877  0.000  2          1
## ---
## Signif. codes:  0 '***' 0.001 '**' 0.01 '*' 0.05 '.' 0.1 ' ' 1
```

We chose the model based on the likelihood ratio test with 5 % significance level, which was `mod_no_interaction`.

### Lifespan brain trajectory

The trajectory shown is from the chosen model `mod_no_interaction_no_icv`.

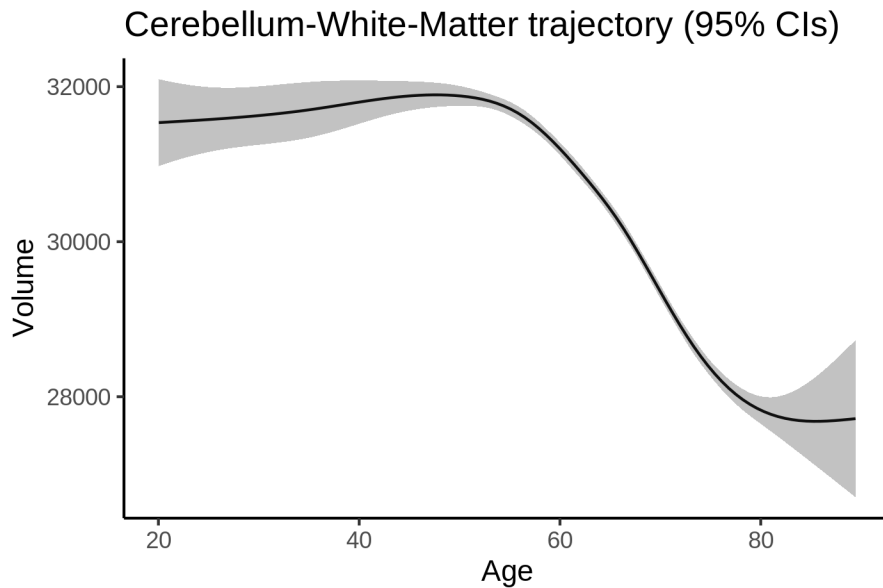

### Effect of sleep

The chosen model only included the main effect of sleep, and hence the effect does not vary with age. The black dot shows the average sleep duration across all ages in the sample.

Cerebellum-White-Matter sleep effect (95% CIs)

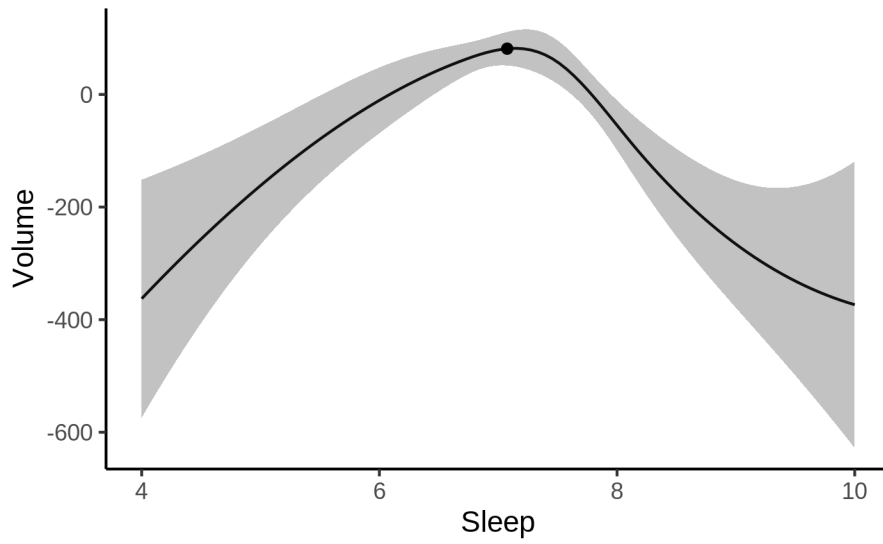

We also show the full interaction model for completeness, although it was not selected.

Cerebellum-White-Matter sleep effect (95% CIs)

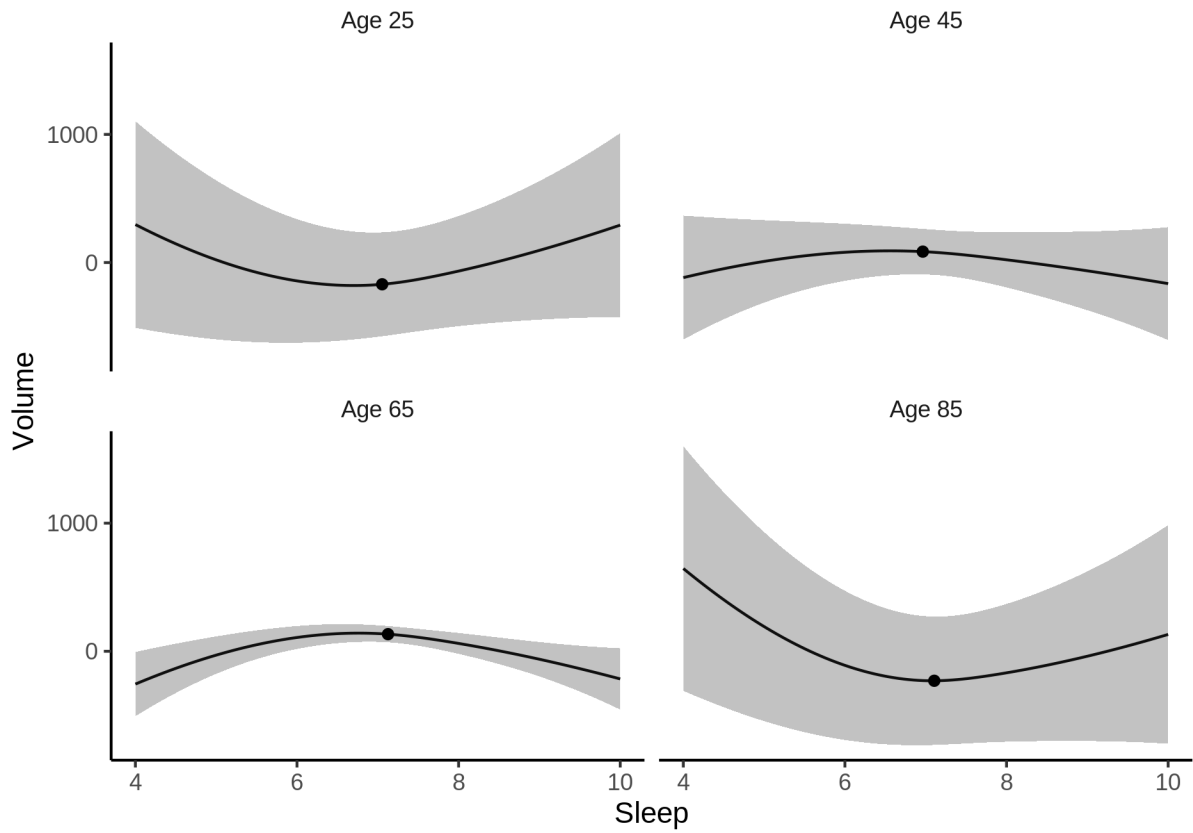

### Deviation from sleep associated with maximal volume

Model with only main effect of sleep was chosen, so we show it for all ages at once. Maximum volume is attained at 7.1 hours of sleep. The percentage values in the plot are calculated as follows: The maximum at 100 % refers to a person at an arbitrary age with a sleep duration associated with maximum volume. For a female, this volume is 30469 and for a male it is 32482. The other percentage values show how large the expected volume is for someone with other sleep durations. For example, 99 % implies a 1 % reduction.

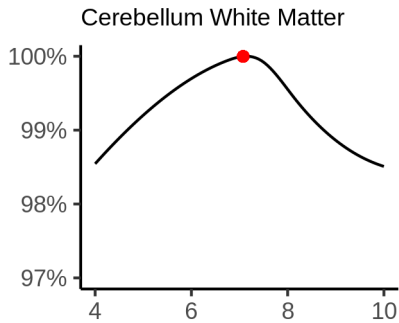

### Comparison of mean sleep and sleep associated with maximum volume

A 95 % confidence interval for the sleep associated with maximum volume is [6.79, 7.33].

The plot below compares average sleep to the sleep associated with maximum volume.

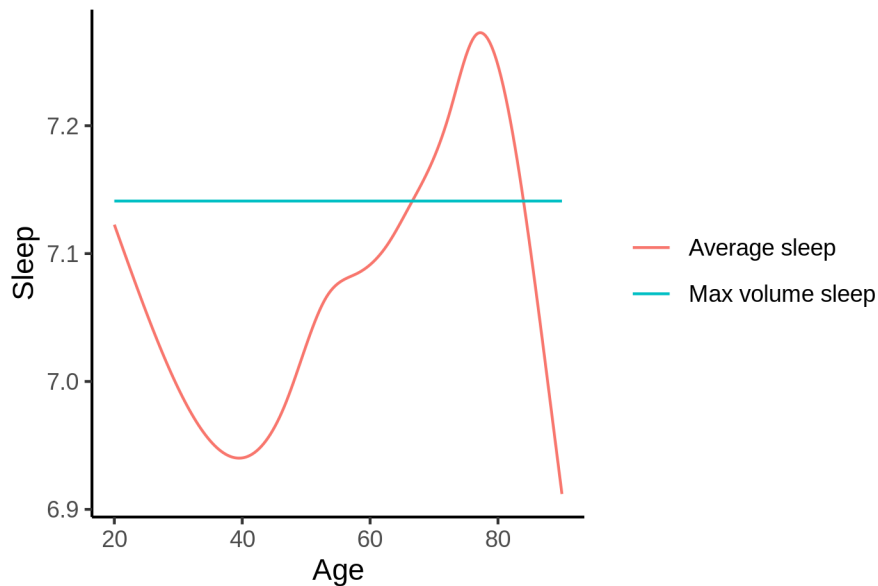

The next plot shows the difference between average sleep and sleep associated with maximum volume. The shaded region is a 95 % confidence interval.

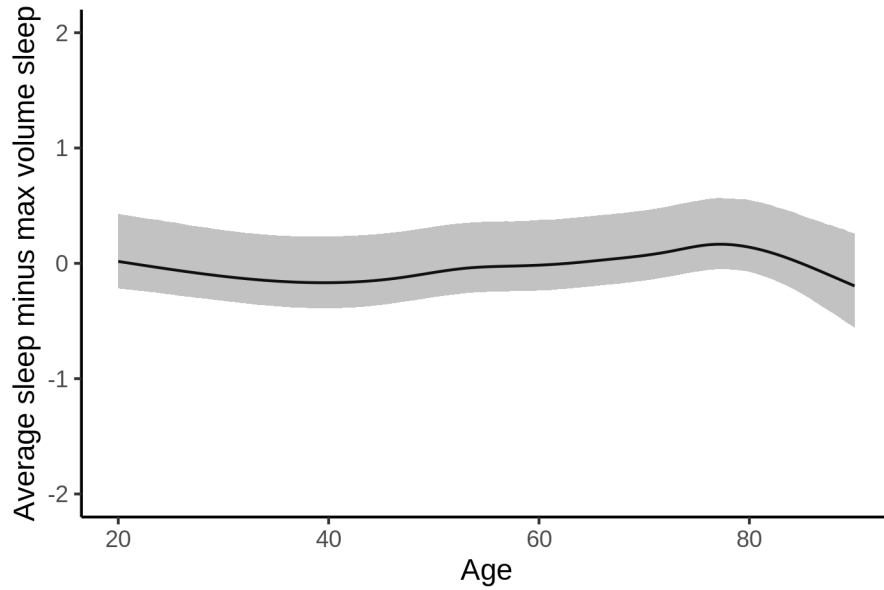

The next plot shows the probability that the sleep duration associated with maximum volume is longer than the average sleep duration, as a function of age. Probability below .05 can be interpreted as evidence that the sleep associated with maximum volume is shorter than the mean sleep, and probability above .95 can be interpreted the opposite way.

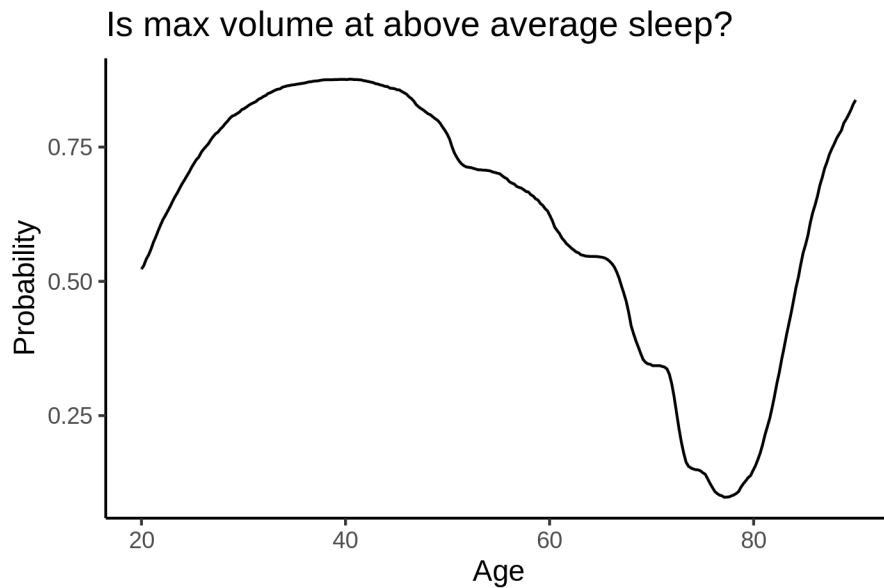

## CerebralWhiteMatterVol

### Descriptive statistics

| Study | Observations | Unique IDs | Mean age | Age range |
|-------|--------------|------------|----------|-----------|
| HCP   | 974          | 974        | 28.8     | 22 - 37   |
| MPIB  | 677          | 391        | 63.1     | 24 - 83   |



| Study | Observations | Unique IDs | Mean age | Age range |
|-------|--------------|------------|----------|-----------|
| UB    | 113          | 39         | 70.9     | 64 - 81   |
| UCAM  | 881          | 631        | 55.1     | 20 - 88   |
| UiO   | 1475         | 803        | 49.4     | 20 - 89   |
| UKB   | 45979        | 43135      | 64.5     | 45 - 83   |
| UmU   | 412          | 279        | 62.2     | 25 - 85   |
| UOXF  | 769          | 769        | 69.8     | 60 - 85   |

## Spaghetti plot

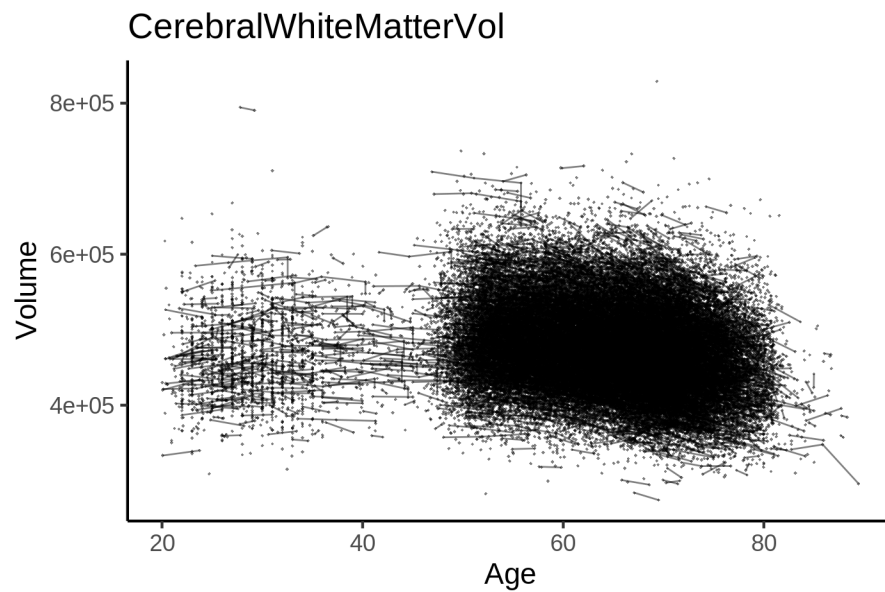

## Models Controlling for ICV

### Model outputs

Model without sleep term

```
##
## Family: gaussian
## Link function: identity
##
## Formula:
## value ~ sex + site + icv + s(age_z, k = 10, bs = "cr")
## <environment: 0x558bed02fcd8>
##
## Parametric coefficients:
##              Estimate Std. Error t value Pr(>|t|)
## (Intercept)  449372.9   1636.1  274.668 < 2e-16 ***
## sexmale      8572.7     340.3   25.194 < 2e-16 ***
## siteMPIB     61369.1    2116.1   29.001 < 2e-16 ***
## siteousAvanto 2141.7    1661.4    1.289  0.1974
## siteousPrisma -6242.1    2791.2   -2.236  0.0253 *
## siteousSkyra -1612.7    1607.5   -1.003  0.3158
```

```

## siteUB          -11021.1    5024.8  -2.193  0.0283 *
## siteUCAM        -9216.5    1830.1  -5.036  4.77e-07 ***
## siteUKB         23312.2    1676.8  13.903 < 2e-16 ***
## siteUmU         13993.5    2371.0   5.902  3.62e-09 ***
## siteUOXF        1281.9    1997.0   0.642  0.5209
## icv             45620.5     170.7  267.228 < 2e-16 ***
## ---
## Signif. codes:  0 '***' 0.001 '**' 0.01 '*' 0.05 '.' 0.1 ' ' 1
##
## Approximate significance of smooth terms:
##           edf Ref.df      F p-value
## s(age_z)  8.334  8.334 876.8 <2e-16 ***
## ---
## Signif. codes:  0 '***' 0.001 '**' 0.01 '*' 0.05 '.' 0.1 ' ' 1
##
## R-sq.(adj) =  0.729
## lmer.REML = 1.193e+06  Scale est. = 4.489e+07  n = 51280

Model with only main effects of age and sleep

##
## Family: gaussian
## Link function: identity
##
## Formula:
## value ~ sex + site + icv + s(age_z, k = 10, bs = "cr") + s(sleep_z,
##           k = 5, bs = "cr")
## <environment: 0x558bed02fcd8>
##
## Parametric coefficients:
##           Estimate Std. Error t value Pr(>|t|)
## (Intercept) 449113.2    1637.4  274.291 < 2e-16 ***
## sexmale      8558.0      340.2   25.158 < 2e-16 ***
## siteMPIB     61723.5    2116.9   29.158 < 2e-16 ***
## siteousAvanto 2259.0    1661.6   1.360  0.1740
## siteousPrisma -6152.9    2790.8  -2.205  0.0275 *
## siteousSkyra -1500.4    1607.8  -0.933  0.3507
## siteUB       -10878.1    5023.2  -2.166  0.0303 *
## siteUCAM     -9056.0    1829.9  -4.949  7.49e-07 ***
## siteUKB      23590.6    1678.2  14.057 < 2e-16 ***
## siteUmU      14743.0    2375.8   6.205  5.50e-10 ***
## siteUOXF     1403.4    1996.8   0.703  0.4822
## icv          45631.6     170.8  267.117 < 2e-16 ***
## ---
## Signif. codes:  0 '***' 0.001 '**' 0.01 '*' 0.05 '.' 0.1 ' ' 1
##
## Approximate significance of smooth terms:
##           edf Ref.df      F p-value
## s(age_z)   8.333  8.333 863.69 < 2e-16 ***
## s(sleep_z) 2.292  2.292  11.25 4.49e-06 ***
## ---
## Signif. codes:  0 '***' 0.001 '**' 0.01 '*' 0.05 '.' 0.1 ' ' 1
##
## R-sq.(adj) =  0.729
## lmer.REML = 1.193e+06  Scale est. = 4.4917e+07  n = 51280

```

Model with full interaction between age and sleep

```
##
## Family: gaussian
## Link function: identity
##
## Formula:
## value ~ sex + site + icv + t2(age_z, sleep_z, k = c(10, 4), bs = "cr")
## <environment: 0x558bed02fcd8>
##
## Parametric coefficients:
##           Estimate Std. Error t value Pr(>|t|)
## (Intercept) 448998.9    1648.5 272.365 < 2e-16 ***
## sexmale      8555.2      340.9  25.095 < 2e-16 ***
## siteMPIB     61844.3    2130.1  29.033 < 2e-16 ***
## siteousAvanto 2383.6    1673.1   1.425  0.1543
## siteousPrisma -6065.5    2798.1  -2.168  0.0302 *
## siteousSkyra -1354.1    1620.0  -0.836  0.4032
## siteUB      -10855.8    5028.2  -2.159  0.0309 *
## siteUCAM    -8972.6    1842.5  -4.870 1.12e-06 ***
## siteUKB     23708.2    1689.7  14.031 < 2e-16 ***
## siteUmU     14869.8    2386.1   6.232 4.64e-10 ***
## siteUOXF    1492.7    2008.4   0.743  0.4573
## icv         45636.1     170.8 267.169 < 2e-16 ***
## ---
## Signif. codes:  0 '***' 0.001 '**' 0.01 '*' 0.05 '.' 0.1 ' ' 1
##
## Approximate significance of smooth terms:
##           edf Ref.df   F p-value
## t2(age_z,sleep_z) 15.53  15.53 16.69 <2e-16 ***
## ---
## Signif. codes:  0 '***' 0.001 '**' 0.01 '*' 0.05 '.' 0.1 ' ' 1
##
## R-sq.(adj) =  0.729
## lmer.REML = 1.193e+06  Scale est. = 4.4923e+07  n = 51280
```

## Model comparison

`mod_no_sleep` refers to model without sleep term, `mod_no_interaction` refers to model with only main effect of sleep, and `mod_full` refers to model with a full interaction between age and sleep. This is a nested model comparison, and the p-value at a given line refers to comparing the model at the line to the model on the line above. Hence, significance implies that the more complicated model is supported on statistical grounds.

To be even more specific, the p-value on the second row tests whether there is an association between sleep and volume. The p-value on the third row tests whether this association depends on age.

```
## Data: NULL
## Models:
## ml$mod_no_sleep$mer: NULL
## ml$mod_no_interaction$mer: NULL
## ml$mod_full$mer: NULL
##           npar      AIC      BIC logLik deviance Chisq Df Pr(>Chisq)
## ml$mod_no_sleep$mer      16 1193015 1193156 -596491  1192983
## ml$mod_no_interaction$mer  18 1192995 1193154 -596480  1192959 23.502  2 7.884e-06 ***
```

```
## ml$mod_full$mer          20 1193008 1193185 -596484 1192968 0.000 2      1
## ---
## Signif. codes:  0 '***' 0.001 '**' 0.01 '*' 0.05 '.' 0.1 ' ' 1
```

We chose the model based on the likelihood ratio test with 5 % significance level, which was `mod_no_interaction`.

### Lifespan brain trajectory

The trajectory shown is from the chosen model `mod_no_interaction`.

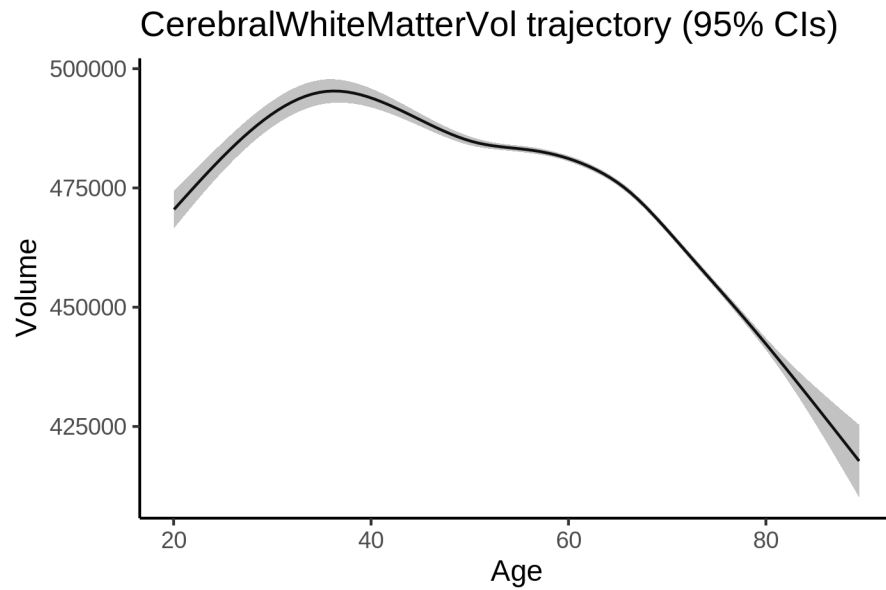

### Effect of sleep

The chosen model only included the main effect of sleep, and hence the effect does not vary with age. The black dot shows the average sleep duration across all ages in the sample.

CerebralWhiteMatterVol sleep effect (95% CIs)

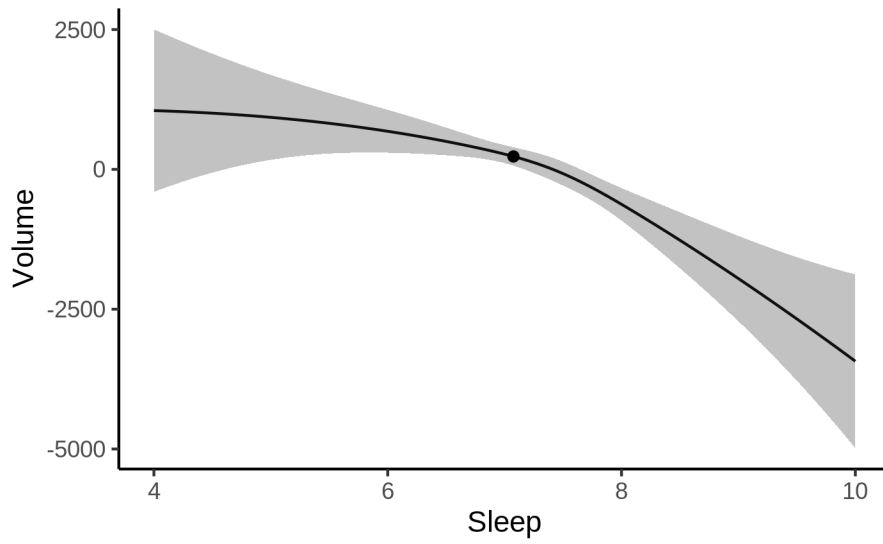

We also show the full interaction model for completeness, although it was not selected.

CerebralWhiteMatterVol sleep effect (95% CIs)

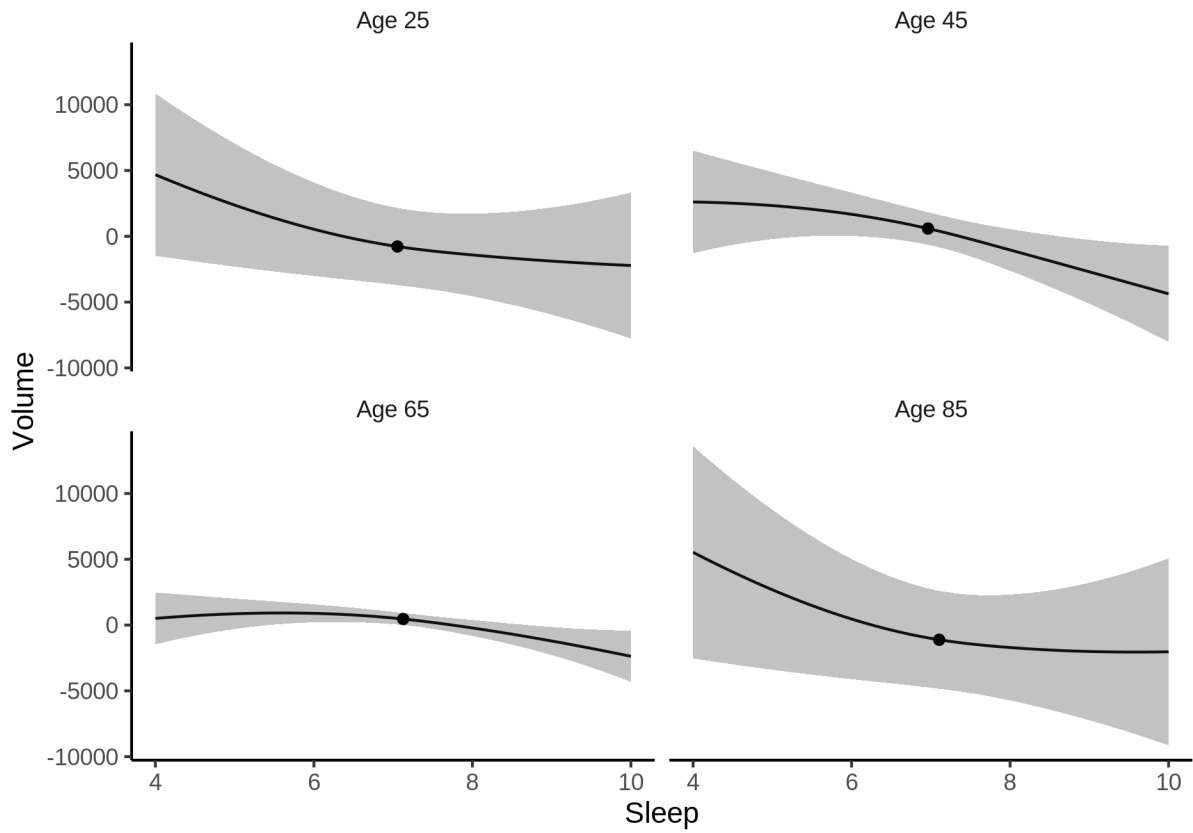

### Deviation from sleep associated with maximal volume

Model with only main effect of sleep was chosen, so we show it for all ages at once. Maximum volume is attained at 4 hours of sleep. The percentage values in the plot are calculated as follows: The maximum at 100 % refers to a person at an arbitrary age with a sleep duration associated with maximum volume. For a female, this volume is 471997 and for a male it is 480555. The other percentage values show how large the expected volume is for someone with other sleep durations. For example, 99 % implies a 1 % reduction.

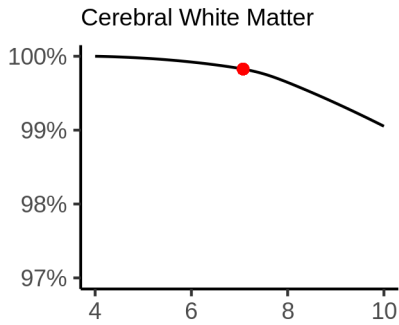

### Comparison of mean sleep and sleep associated with maximum volume

A 95 % confidence interval for the sleep associated with maximum volume is [4, 6.06]. The plot below compares average sleep to the sleep associated with maximum volume.

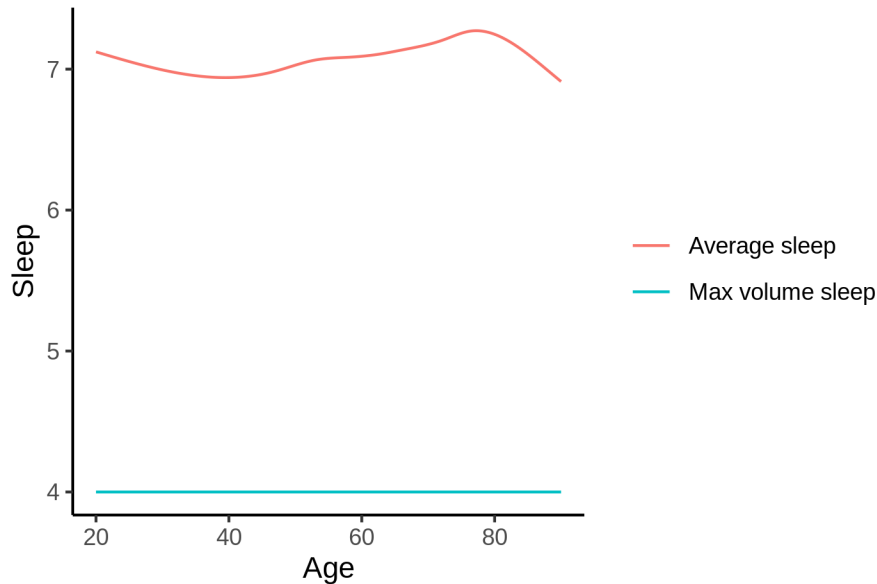

The next plot shows the difference between average sleep and sleep associated with maximum volume. The shaded region is a 95 % confidence interval.

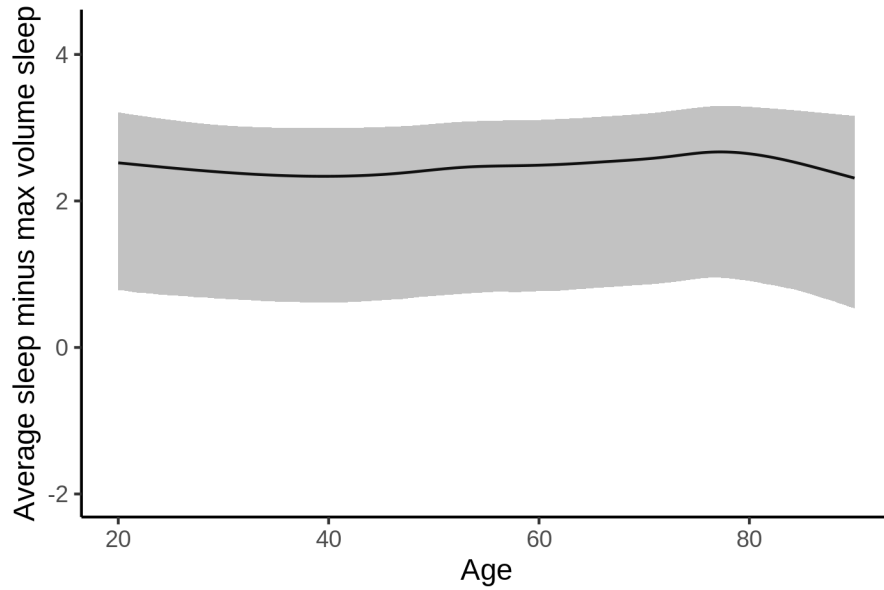

The next plot shows the probability that the sleep duration associated with maximum volume is longer than the average sleep duration, as a function of age. Probability below .05 can be interpreted as evidence that the sleep associated with maximum volume is shorter than the mean sleep, and probability above .95 can be interpreted the opposite way.

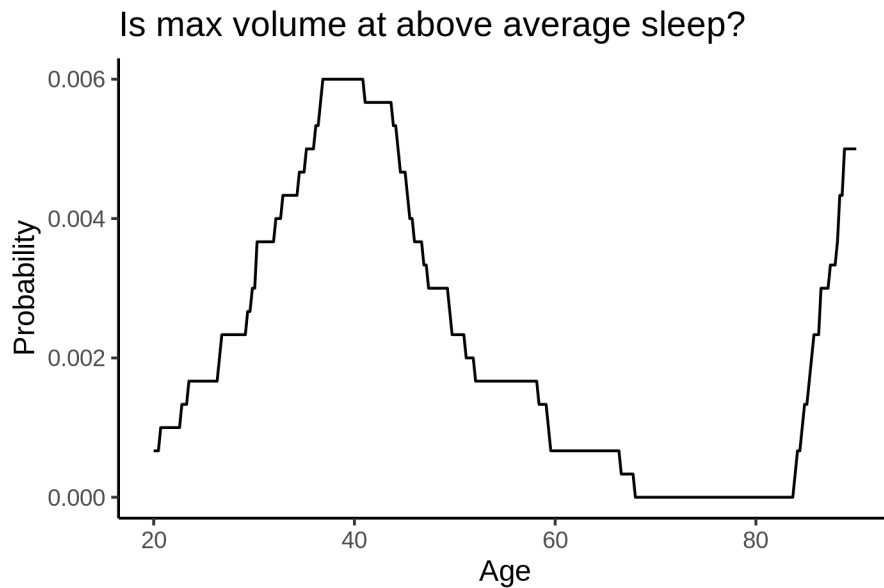

### Controlling for covariates

Below is the output for a model in which we only include data with income and education.

```
##
## Family: gaussian
## Link function: identity
##
## Formula:
```

```

## value ~ sex + site + s(age_z, k = 10, bs = "cr") + s(sleep_z,
##   k = 5, bs = "cr") + icv
## <environment: 0x558a47f00bb0>
##
## Parametric coefficients:
##           Estimate Std. Error t value Pr(>|t|)
## (Intercept)  521949.5    3900.2  133.83 <2e-16 ***
## sexmale      7792.6      425.4   18.32 <2e-16 ***
## siteousAvanto -77988.9   4526.8  -17.23 <2e-16 ***
## siteousPrisma -74182.5   4731.4  -15.68 <2e-16 ***
## siteousSkyra -75120.2   4198.2  -17.89 <2e-16 ***
## siteUKB      -48770.3   3893.6  -12.53 <2e-16 ***
## siteUOXF     -59368.6   4376.1  -13.57 <2e-16 ***
## icv          47017.2    218.0   215.66 <2e-16 ***
## ---
## Signif. codes:  0 '***' 0.001 '**' 0.01 '*' 0.05 '.' 0.1 ' ' 1
##
## Approximate significance of smooth terms:
##           edf Ref.df      F p-value
## s(age_z)   7.754  7.754 475.792 <2e-16 ***
## s(sleep_z) 1.478  1.478   2.587  0.0555 .
## ---
## Signif. codes:  0 '***' 0.001 '**' 0.01 '*' 0.05 '.' 0.1 ' ' 1
##
## R-sq.(adj) =  0.735
## lmer.REML = 7.2471e+05  Scale est. = 4.5032e+07  n = 31196

```

Below is the output for a model in which we control for the main effects of income and education.

```

##
## Family: gaussian
## Link function: identity
##
## Formula:
## value ~ sex + site + s(age_z, k = 10, bs = "cr") + s(sleep_z,
##   k = 5, bs = "cr") + icv + income_scaled + education_scaled
## <environment: 0x558a47f00bb0>
##
## Parametric coefficients:
##           Estimate Std. Error t value Pr(>|t|)
## (Intercept)  522573.0    3924.4  133.160 <2e-16 ***
## sexmale      7727.1      426.6   18.114 <2e-16 ***
## siteousAvanto -77788.1   4527.8  -17.180 <2e-16 ***
## siteousPrisma -74081.3   4731.3  -15.658 <2e-16 ***
## siteousSkyra -74918.5   4199.1  -17.841 <2e-16 ***
## siteUKB      -48498.7   3895.8  -12.449 <2e-16 ***
## siteUOXF     -59441.5   4378.2  -13.577 <2e-16 ***
## icv          47052.2    219.9  214.002 <2e-16 ***
## income_scaled   464.4     506.5   0.917  0.3592
## education_scaled -1386.4    599.5  -2.313  0.0207 *
## ---
## Signif. codes:  0 '***' 0.001 '**' 0.01 '*' 0.05 '.' 0.1 ' ' 1
##
## Approximate significance of smooth terms:
##           edf Ref.df      F p-value

```



```
## s(age_z) 7.761 7.761 437.3 <2e-16 ***
## s(sleep_z) 1.563 1.563 2.3 0.0667 .
## ---
## Signif. codes: 0 '***' 0.001 '**' 0.01 '*' 0.05 '.' 0.1 ' ' 1
##
## R-sq.(adj) = 0.735
## lmer.REML = 7.2468e+05 Scale est. = 4.5048e+07 n = 31196
```

We also included interaction effects between sleep duration and education and income, in another model. The output is shown below, and the interaction terms are `income_scaled:sleep_z` and `education_scaled:sleep_z`.

```
##
## Family: gaussian
## Link function: identity
##
## Formula:
## value ~ sex + site + s(age_z, k = 10, bs = "cr") + s(sleep_z,
## k = 5, bs = "cr") + icv + income_scaled + education_scaled +
## income_scaled:sleep_z + education_scaled:sleep_z
## <environment: 0x558a47f00bb0>
##
## Parametric coefficients:
## Estimate Std. Error t value Pr(>|t|)
## (Intercept) 522642.1 3924.6 133.170 <2e-16 ***
## sexmale 7743.5 426.9 18.140 <2e-16 ***
## siteousAvanto -77799.4 4527.8 -17.182 <2e-16 ***
## siteousPrisma -74054.8 4731.7 -15.651 <2e-16 ***
## siteousSkyra -74929.1 4199.2 -17.844 <2e-16 ***
## siteUKB -48579.2 3896.1 -12.469 <2e-16 ***
## siteUOXF -59591.4 4379.4 -13.607 <2e-16 ***
## icv 47053.1 219.9 213.983 <2e-16 ***
## income_scaled 443.8 506.9 0.876 0.3812
## education_scaled -1382.7 599.6 -2.306 0.0211 *
## income_scaled:sleep_z 702.0 502.7 1.396 0.1626
## education_scaled:sleep_z 269.9 581.0 0.464 0.6423
## ---
## Signif. codes: 0 '***' 0.001 '**' 0.01 '*' 0.05 '.' 0.1 ' ' 1
##
## Approximate significance of smooth terms:
## edf Ref.df F p-value
## s(age_z) 7.757 7.757 437.496 <2e-16 ***
## s(sleep_z) 1.649 1.649 1.772 0.108
## ---
## Signif. codes: 0 '***' 0.001 '**' 0.01 '*' 0.05 '.' 0.1 ' ' 1
##
## R-sq.(adj) = 0.735
## lmer.REML = 7.2465e+05 Scale est. = 4.5049e+07 n = 31196
```

We did the same controlling for BMI. Below is the model with no covariates but only keeping data with BMI.

```
##
## Family: gaussian
## Link function: identity
##
## Formula:
```

```

## value ~ sex + site + s(age_z, k = 10, bs = "cr") + s(sleep_z,
##   k = 5, bs = "cr") + icv
## <environment: 0x558a47a58568>
##
## Parametric coefficients:
##           Estimate Std. Error t value Pr(>|t|)
## (Intercept) 452757.0   2365.7 191.384 < 2e-16 ***
## sexmale      7085.3     408.9  17.329 < 2e-16 ***
## siteousPrisma -6114.8   3145.7  -1.944  0.0519 .
## siteousSkyra  -470.0    1675.2  -0.281  0.7791
## siteUCAM     -10345.7   2519.3  -4.107 4.02e-05 ***
## siteUKB      20720.8   2390.0   8.670 < 2e-16 ***
## siteUmU      13205.8   2908.5   4.540 5.63e-06 ***
## icv          47511.1    210.1 226.096 < 2e-16 ***
## ---
## Signif. codes:  0 '***' 0.001 '**' 0.01 '*' 0.05 '.' 0.1 ' ' 1
##
## Approximate significance of smooth terms:
##           edf Ref.df      F p-value
## s(age_z)   7.697  7.697 555.050 <2e-16 ***
## s(sleep_z) 1.002  1.002   5.707  0.0169 *
## ---
## Signif. codes:  0 '***' 0.001 '**' 0.01 '*' 0.05 '.' 0.1 ' ' 1
##
## R-sq.(adj) =  0.742
## lmer.REML = 7.7586e+05  Scale est. = 4.3344e+07  n = 33449

```

Below is the model output with main effect.

```

##
## Family: gaussian
## Link function: identity
##
## Formula:
## value ~ sex + site + s(age_z, k = 10, bs = "cr") + s(sleep_z,
##   k = 5, bs = "cr") + icv + bmi
## <environment: 0x558a47a58568>
##
## Parametric coefficients:
##           Estimate Std. Error t value Pr(>|t|)
## (Intercept) 469696.67   2564.10 183.182 < 2e-16 ***
## sexmale      7615.37     408.21  18.655 < 2e-16 ***
## siteousPrisma -5479.31   3138.56  -1.746  0.0809 .
## siteousSkyra  -426.20    1675.55  -0.254  0.7992
## siteUCAM     -9935.84   2512.80  -3.954 7.70e-05 ***
## siteUKB      21227.30   2384.67   8.902 < 2e-16 ***
## siteUmU      13945.37   2899.77   4.809 1.52e-06 ***
## icv          47609.94    209.25 227.528 < 2e-16 ***
## bmi          -671.05     39.65 -16.926 < 2e-16 ***
## ---
## Signif. codes:  0 '***' 0.001 '**' 0.01 '*' 0.05 '.' 0.1 ' ' 1
##
## Approximate significance of smooth terms:
##           edf Ref.df      F p-value
## s(age_z)   7.695  7.695 563.32 < 2e-16 ***

```

```
## s(sleep_z) 1.000 1.000 10.01 0.00156 **
## ---
## Signif. codes:  0 '***' 0.001 '**' 0.01 '*' 0.05 '.' 0.1 ' ' 1
##
## R-sq.(adj) = 0.745
## lmer.REML = 7.7557e+05  Scale est. = 4.3385e+07  n = 33449
```

Next is the model with BMI-sleep interaction.

```
##
## Family: gaussian
## Link function: identity
##
## Formula:
## value ~ sex + site + s(age_z, k = 10, bs = "cr") + s(sleep_z,
##      k = 5, bs = "cr") + icv + bmi + bmi:sleep_z
## <environment: 0x558a47a58568>
##
## Parametric coefficients:
##              Estimate Std. Error t value Pr(>|t|)
## (Intercept) 469730.54   2565.47 183.097 < 2e-16 ***
## sexmale      7614.71     408.22  18.653 < 2e-16 ***
## siteousPrisma -5479.25   3138.58  -1.746  0.0809 .
## siteousSkyra  -428.75    1675.57  -0.256  0.7980
## siteUCAM     -9948.24   2513.01  -3.959 7.55e-05 ***
## siteUKB      21215.35   2384.88   8.896 < 2e-16 ***
## siteUmU      13934.63   2899.92   4.805 1.55e-06 ***
## icv          47609.37    209.26 227.517 < 2e-16 ***
## bmi          -671.59     39.67 -16.930 < 2e-16 ***
## bmi:sleep_z  -15.28      37.54  -0.407  0.6839
## ---
## Signif. codes:  0 '***' 0.001 '**' 0.01 '*' 0.05 '.' 0.1 ' ' 1
##
## Approximate significance of smooth terms:
##              edf Ref.df      F p-value
## s(age_z)     7.695  7.695 563.147 <2e-16 ***
## s(sleep_z)  1.000  1.000   0.016  0.899
## ---
## Signif. codes:  0 '***' 0.001 '**' 0.01 '*' 0.05 '.' 0.1 ' ' 1
##
## R-sq.(adj) = 0.745
## lmer.REML = 7.7556e+05  Scale est. = 4.3385e+07  n = 33449
```

We did the same controlling for depression. Below is the model with no covariates but only keeping data with depression.

```
##
## Family: gaussian
## Link function: identity
##
## Formula:
## value ~ sex + site + s(age_z, k = 10, bs = "cr") + s(sleep_z,
##      k = 5, bs = "cr") + icv
## <environment: 0x558a473ca2d8>
##
## Parametric coefficients:
```

```

##           Estimate Std. Error t value Pr(>|t|)
## (Intercept) 502308.9    1973.3  254.55 <2e-16 ***
## sexmale      7244.3     413.3   17.53 <2e-16 ***
## siteousAvanto -46978.7   3847.4  -12.21 <2e-16 ***
## siteousPrisma -51554.6   3717.9  -13.87 <2e-16 ***
## siteousSkyra -49103.8   2954.4  -16.62 <2e-16 ***
## siteUCAM     -61968.8   2709.1  -22.88 <2e-16 ***
## siteUKB     -28983.2   1951.7  -14.85 <2e-16 ***
## siteUmU     -36652.0   2644.1  -13.86 <2e-16 ***
## icv         47241.6    212.1  222.70 <2e-16 ***
## ---
## Signif. codes:  0 '***' 0.001 '**' 0.01 '*' 0.05 '.' 0.1 ' ' 1
##
## Approximate significance of smooth terms:
##           edf Ref.df      F p-value
## s(age_z)   7.703  7.703 545.5 <2e-16 ***
## s(sleep_z) 1.408  1.408   5.2  0.0301 *
## ---
## Signif. codes:  0 '***' 0.001 '**' 0.01 '*' 0.05 '.' 0.1 ' ' 1
##
## R-sq.(adj) =  0.736
## lmer.REML = 7.7393e+05  Scale est. = 4.2768e+07  n = 33361

```

Below is the model output with main effect.

```

##
## Family: gaussian
## Link function: identity
##
## Formula:
## value ~ sex + site + s(age_z, k = 10, bs = "cr") + s(sleep_z,
##           k = 5, bs = "cr") + icv + depression
## <environment: 0x558a473ca2d8>
##
## Parametric coefficients:
##           Estimate Std. Error t value Pr(>|t|)
## (Intercept) 503027.8    1981.5 253.865 < 2e-16 ***
## sexmale      7170.9     413.6  17.338 < 2e-16 ***
## siteousAvanto -46607.7   3847.5 -12.114 < 2e-16 ***
## siteousPrisma -51218.5   3718.0 -13.776 < 2e-16 ***
## siteousSkyra -48688.6   2955.6 -16.473 < 2e-16 ***
## siteUCAM     -61794.6   2708.9 -22.812 < 2e-16 ***
## siteUKB     -29282.9   1952.8 -14.995 < 2e-16 ***
## siteUmU     -34490.8   2699.0 -12.779 < 2e-16 ***
## icv         47251.0    212.0 222.837 < 2e-16 ***
## depression   -5826.8    1467.3  -3.971 7.17e-05 ***
## ---
## Signif. codes:  0 '***' 0.001 '**' 0.01 '*' 0.05 '.' 0.1 ' ' 1
##
## Approximate significance of smooth terms:
##           edf Ref.df      F p-value
## s(age_z)   7.7    7.7 547.274 < 2e-16 ***
## s(sleep_z) 1.0    1.0  7.296 0.00692 **
## ---
## Signif. codes:  0 '***' 0.001 '**' 0.01 '*' 0.05 '.' 0.1 ' ' 1

```

```
##
## R-sq.(adj) = 0.736
## lmer.REML = 7.7389e+05 Scale est. = 4.2739e+07 n = 33361
```

Next is the model with depression-sleep interaction.

```
##
## Family: gaussian
## Link function: identity
##
## Formula:
## value ~ sex + site + s(age_z, k = 10, bs = "cr") + s(sleep_z,
##     k = 5, bs = "cr") + icv + depression + depression:sleep_z
## <environment: 0x558a473ca2d8>
##
## Parametric coefficients:
##           Estimate Std. Error t value Pr(>|t|)
## (Intercept)  503027.6    1981.5  253.860 < 2e-16 ***
## sexmale      7169.3      413.7   17.331 < 2e-16 ***
## siteousAvanto -46618.2    3847.8  -12.115 < 2e-16 ***
## siteousPrisma -51228.9    3718.4  -13.777 < 2e-16 ***
## siteousSkyra  -48698.7    2956.0  -16.474 < 2e-16 ***
## siteUCAM     -61805.8    2709.4  -22.811 < 2e-16 ***
## siteUKB     -29282.2    1952.9  -14.994 < 2e-16 ***
## siteUmU     -34415.5    2721.0  -12.648 < 2e-16 ***
## icv          47251.2     212.0  222.832 < 2e-16 ***
## depression   -5844.7    1469.6   -3.977 6.99e-05 ***
## depression:sleep_z -233.8    1072.4   -0.218 0.827
## ---
## Signif. codes:  0 '***' 0.001 '**' 0.01 '*' 0.05 '.' 0.1 ' ' 1
##
## Approximate significance of smooth terms:
##           edf Ref.df      F p-value
## s(age_z)   7.699  7.699 547.349 <2e-16 ***
## s(sleep_z) 1.000  1.000  4.682 0.0305 *
## ---
## Signif. codes:  0 '***' 0.001 '**' 0.01 '*' 0.05 '.' 0.1 ' ' 1
##
## R-sq.(adj) = 0.736
## lmer.REML = 7.7388e+05 Scale est. = 4.2737e+07 n = 33361
```

The plot below shows the sleep-volume curve for the original model and for the model with main effects of SES.

CerebralWhiteMatterVol sleep effect, covariates

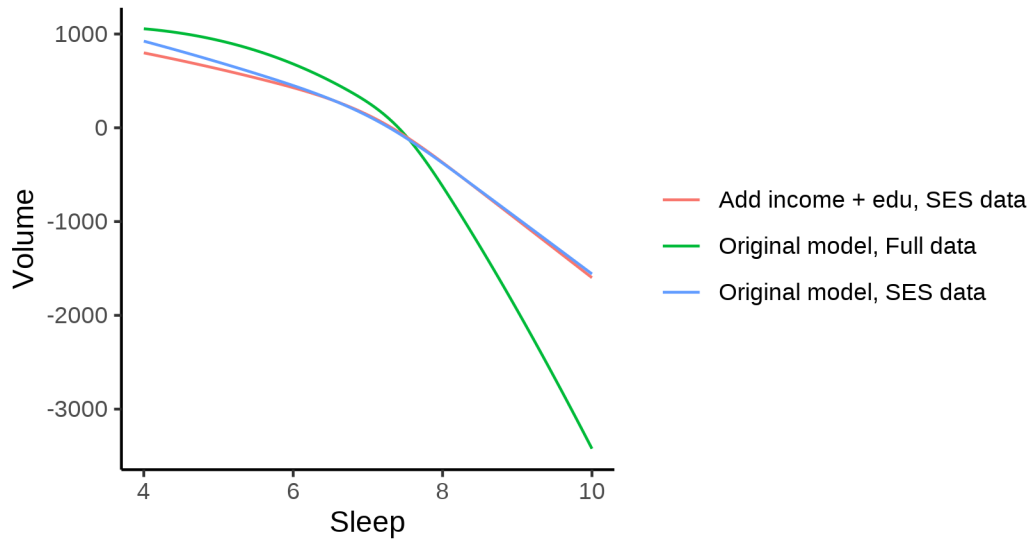

The plot below shows the sleep-volume curve for the original model and for the model with main effects of BMI.

CerebralWhiteMatterVol sleep effect, covariates

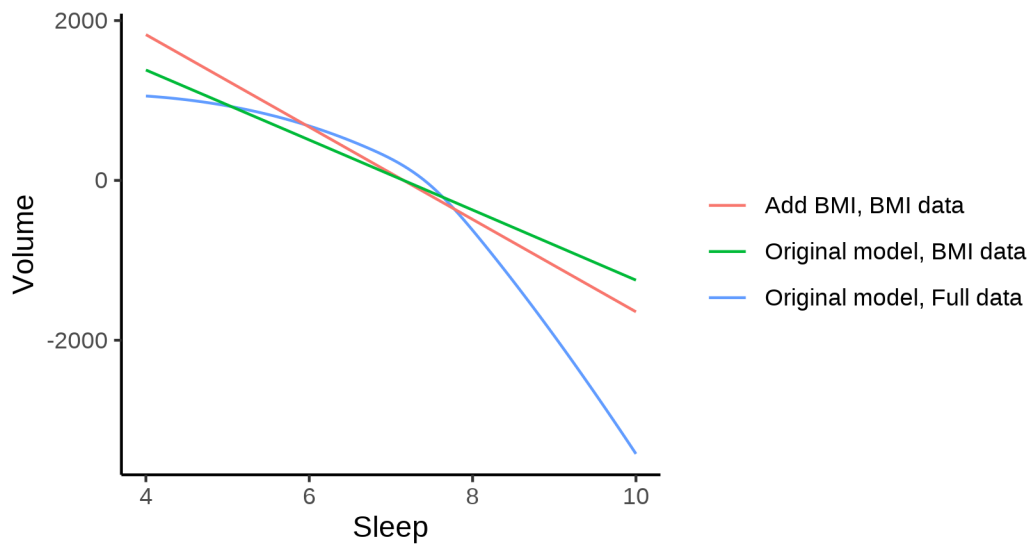

The plot below shows the sleep-volume curve for the original model and for the model with main effects of depression.

## CerebralWhiteMatterVol sleep effect, covariates

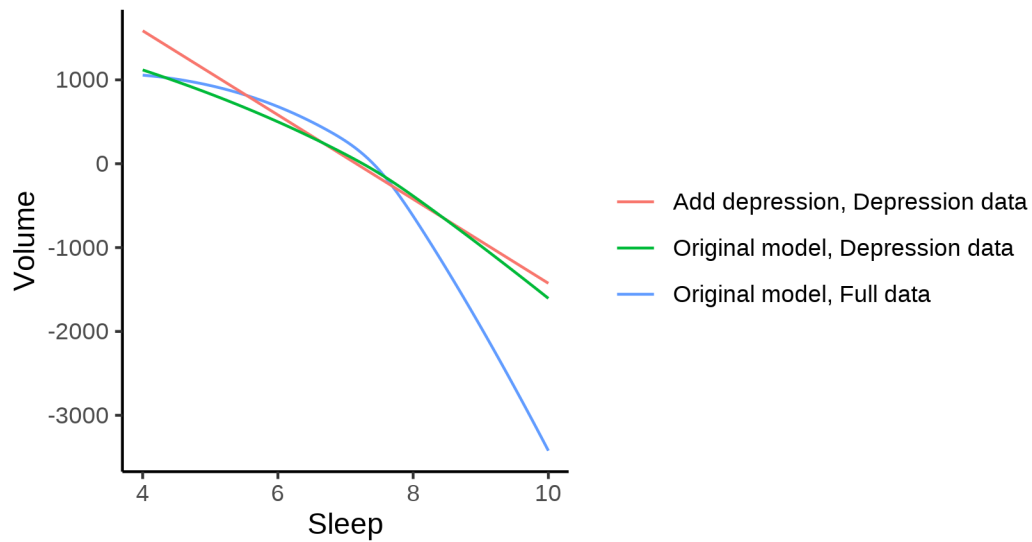

## Models Not controlling for ICV

### Model outputs

Model without sleep term

```
##
## Family: gaussian
## Link function: identity
##
## Formula:
## value ~ sex + site + s(age_z, k = 10, bs = "cr")
## <environment: 0x558ad98ce1c8>
##
## Parametric coefficients:
##              Estimate Std. Error t value Pr(>|t|)
## (Intercept)  423160.1    2365.3  178.906 < 2e-16 ***
## sexmale      60429.5     443.9  136.125 < 2e-16 ***
## siteMPIB     -10704.8    3225.5  -3.319 0.000905 ***
## siteousAvanto 21812.8    2492.9   8.750 < 2e-16 ***
## siteousPrisma  6656.8     3920.4   1.698 0.089514 .
## siteousSkyra  1744.6     2472.6   0.706 0.480461
## siteUB       -23016.2    7969.8  -2.888 0.003880 **
## siteUCAM     -5725.5     2792.6  -2.050 0.040346 *
## siteUKB      25817.8    2421.5  10.662 < 2e-16 ***
## siteUmU      -3286.8     3640.1  -0.903 0.366563
## siteUOXF     -7869.6     2974.4  -2.646 0.008153 **
## ---
## Signif. codes:  0 '***' 0.001 '**' 0.01 '*' 0.05 '.' 0.1 ' ' 1
##
## Approximate significance of smooth terms:
##              edf Ref.df    F p-value
## s(age_z)    7.606  7.606 730.5 <2e-16 ***
```

```
## ---
## Signif. codes:  0 '***' 0.001 '**' 0.01 '*' 0.05 '.' 0.1 ' ' 1
##
## R-sq.(adj) =  0.32
## lmer.REML = 1.2364e+06  Scale est. = 4.3755e+07  n = 51280
```

Model with only main effects of age and sleep

```
##
## Family: gaussian
## Link function: identity
##
## Formula:
## value ~ sex + site + s(age_z, k = 10, bs = "cr") + s(sleep_z,
##       k = 5, bs = "cr")
## <environment: 0x558ad98ce1c8>
##
## Parametric coefficients:
##           Estimate Std. Error t value Pr(>|t|)
## (Intercept) 423866.3    2366.7 179.096 < 2e-16 ***
## sexmale      60315.2     443.9 135.887 < 2e-16 ***
## siteMPIB     -10839.0    3224.7  -3.361 0.000776 ***
## siteousAvanto 21311.0    2492.3   8.551 < 2e-16 ***
## siteousPrisma  6237.1     3919.0   1.591 0.111507
## siteousSkyra  1216.2     2471.9   0.492 0.622728
## siteUB       -22684.9    7963.9  -2.848 0.004395 **
## siteUCAM     -5819.5     2791.0  -2.085 0.037065 *
## siteUKB      25129.8    2422.9  10.372 < 2e-16 ***
## siteUmU      -3770.5     3645.4  -1.034 0.300988
## siteUOXF     -8172.4     2972.9  -2.749 0.005979 **
```

```
## ---
## Signif. codes:  0 '***' 0.001 '**' 0.01 '*' 0.05 '.' 0.1 ' ' 1
##
## Approximate significance of smooth terms:
##           edf Ref.df      F p-value
## s(age_z)   7.598  7.598 721.10 <2e-16 ***
## s(sleep_z) 3.583  3.583  18.76 <2e-16 ***
```

```
## ---
## Signif. codes:  0 '***' 0.001 '**' 0.01 '*' 0.05 '.' 0.1 ' ' 1
##
## R-sq.(adj) =  0.321
## lmer.REML = 1.2363e+06  Scale est. = 4.3776e+07  n = 51280
```

Model with full interaction between age and sleep

```
##
## Family: gaussian
## Link function: identity
##
## Formula:
## value ~ sex + site + t2(age_z, sleep_z, k = c(10, 4), bs = "cr")
## <environment: 0x558ad98ce1c8>
##
## Parametric coefficients:
##           Estimate Std. Error t value Pr(>|t|)
## (Intercept) 423694.0    2368.6 178.878 < 2e-16 ***
```



```

## sexmale          60429.3      444.7 135.879 < 2e-16 ***
## siteMPIB         -11289.5     3235.7  -3.489 0.000485 ***
## siteousAvanto    21481.8     2504.8   8.576 < 2e-16 ***
## siteousPrisma    6288.6      3930.5   1.600 0.109618
## siteousSkyra     1387.5      2484.8   0.558 0.576564
## siteUB           -23441.0     7968.0  -2.942 0.003264 **
## siteUCAM         -6116.2     2801.2  -2.183 0.029006 *
## siteUKB          25268.1     2424.2  10.423 < 2e-16 ***
## siteUmU          -3965.6     3651.1  -1.086 0.277429
## siteUOXF         -8372.2     2977.9  -2.811 0.004933 **
## ---
## Signif. codes:  0 '***' 0.001 '**' 0.01 '*' 0.05 '.' 0.1 ' ' 1
##
## Approximate significance of smooth terms:
##                edf Ref.df    F p-value
## t2(age_z,sleep_z) 12.65 12.65 13.19 <2e-16 ***
## ---
## Signif. codes:  0 '***' 0.001 '**' 0.01 '*' 0.05 '.' 0.1 ' ' 1
##
## R-sq.(adj) =  0.32
## lmer.REML = 1.2363e+06  Scale est. = 4.3867e+07  n = 51280

```

## Model comparison

`mod_no_sleep` refers to model without sleep term, `mod_no_interaction` refers to model with only main effect of sleep, and `mod_full` refers to model with a full interaction between age and sleep. This is a nested model comparison, and the p-value at a given line refers to comparing the model at the line to the model on the line above. Hence, significance implies that the more complicated model is supported on statistical grounds.

To be even more specific, the p-value on the second row tests whether there is an association between sleep and volume. The p-value on the third row tests whether this association depends on age.

```

## Data: NULL
## Models:
## ml$mod_no_sleep$mer: NULL
## ml$mod_no_interaction$mer: NULL
## ml$mod_full$mer: NULL
##
##                npar      AIC      BIC logLik deviance Chisq Df Pr(>Chisq)
## ml$mod_no_sleep$mer      15 1236381 1236514 -618176 1236351
## ml$mod_no_interaction$mer 17 1236325 1236475 -618145 1236291 60.381 2 7.736e-14 ***
## ml$mod_full$mer          19 1236362 1236530 -618162 1236324 0.000 2 1
## ---
## Signif. codes:  0 '***' 0.001 '**' 0.01 '*' 0.05 '.' 0.1 ' ' 1

```

We chose the model based on the likelihood ratio test with 5 % significance level, which was `mod_no_interaction`.

## Lifespan brain trajectory

The trajectory shown is from the chosen model `mod_no_interaction_no_icv`.

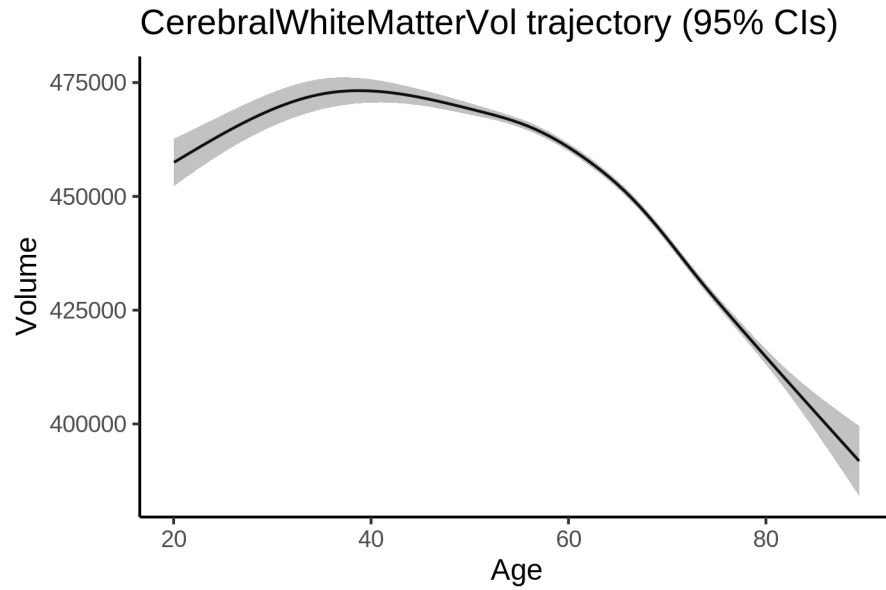

### Effect of sleep

The chosen model only included the main effect of sleep, and hence the effect does not vary with age. The black dot shows the average sleep duration across all ages in the sample.

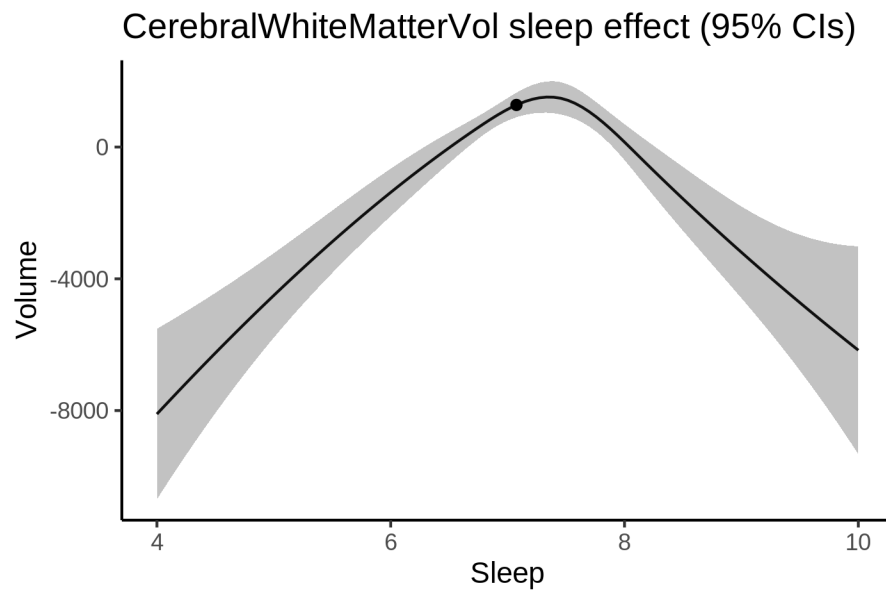

We also show the full interaction model for completeness, although it was not selected.

### CerebralWhiteMatterVol sleep effect (95% CIs)

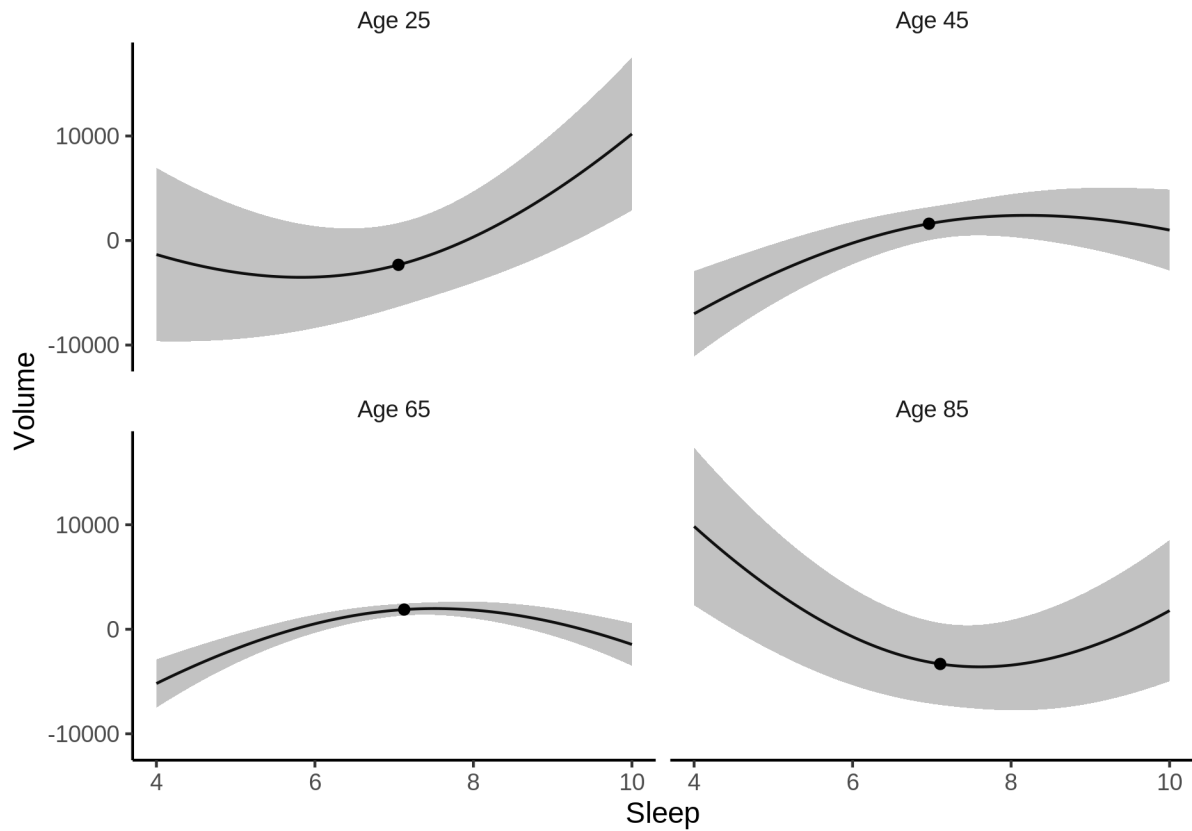

### Deviation from sleep associated with maximal volume

Model with only main effect of sleep was chosen, so we show it for all ages at once. Maximum volume is attained at 7.4 hours of sleep. The percentage values in the plot are calculated as follows: The maximum at 100 % refers to a person at an arbitrary age with a sleep duration associated with maximum volume. For a female, this volume is 450342 and for a male it is 510657. The other percentage values show how large the expected volume is for someone with other sleep durations. For example, 99 % implies a 1 % reduction.

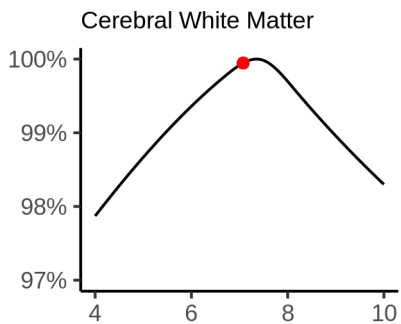

### Comparison of mean sleep and sleep associated with maximum volume

A 95 % confidence interval for the sleep associated with maximum volume is [7.27, 7.45].

The plot below compares average sleep to the sleep associated with maximum volume.

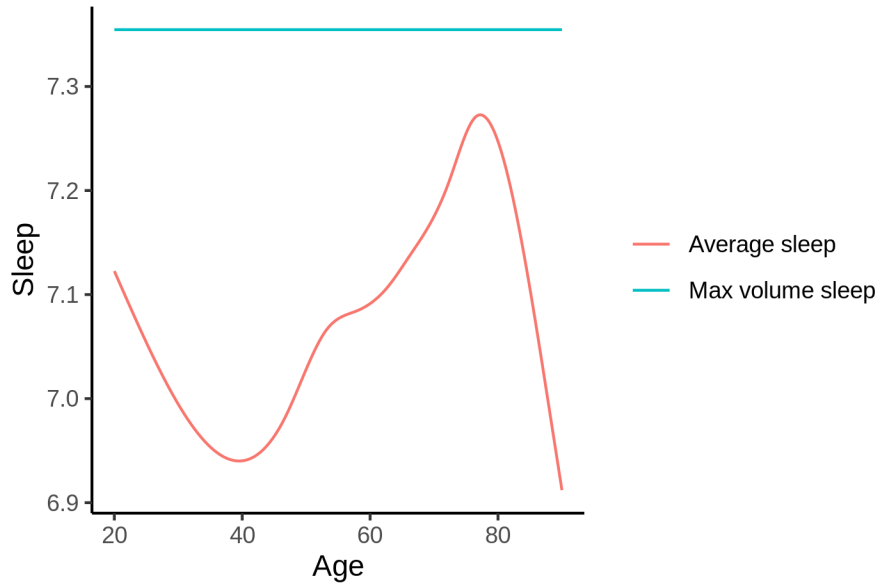

The next plot shows the difference between average sleep and sleep associated with maximum volume. The shaded region is a 95 % confidence interval.

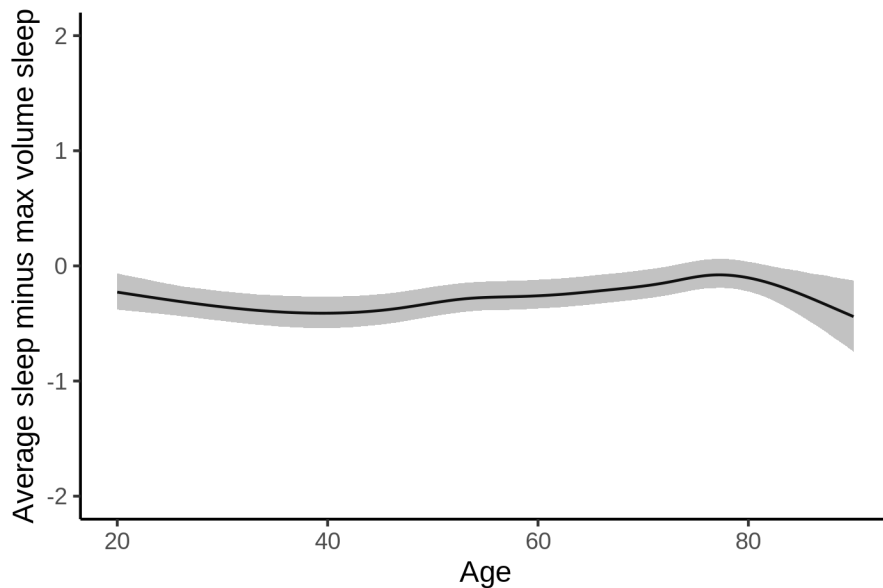

The next plot shows the probability that the sleep duration associated with maximum volume is longer than the average sleep duration, as a function of age. Probability below .05 can be interpreted as evidence that the sleep associated with maximum volume is shorter than the mean sleep, and probability above .95 can be interpreted the opposite way.

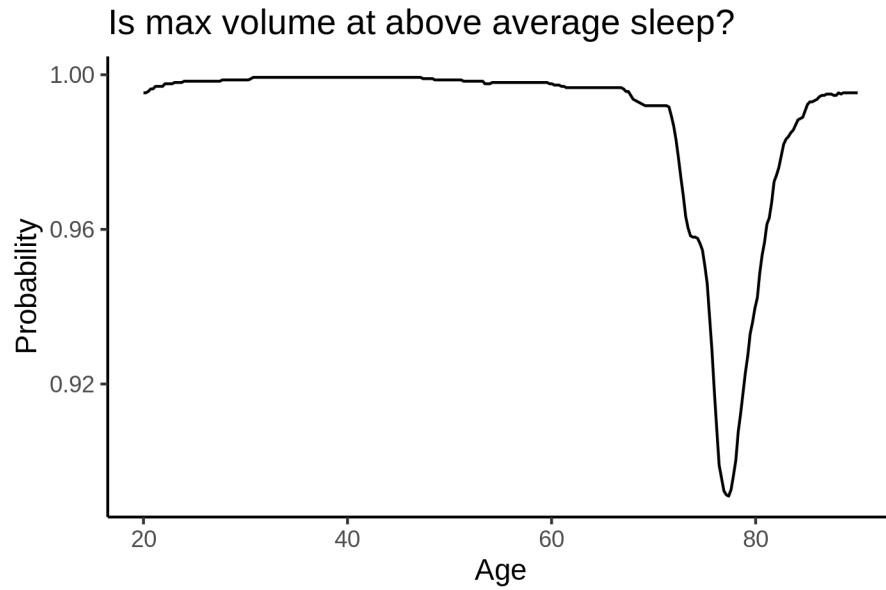

## EstimatedTotalIntraCranialVol

### Descriptive statistics

| Study | Observations | Unique IDs | Mean age | Age range |
|-------|--------------|------------|----------|-----------|
| HCP   | 974          | 974        | 28.8     | 22 - 37   |
| MPIB  | 677          | 391        | 63.1     | 24 - 83   |
| UB    | 113          | 39         | 70.9     | 64 - 81   |
| UCAM  | 884          | 632        | 55.1     | 20 - 88   |
| UiO   | 1475         | 803        | 49.4     | 20 - 89   |
| UKB   | 45985        | 43138      | 64.5     | 45 - 83   |
| UmU   | 412          | 279        | 62.2     | 25 - 85   |
| UOXF  | 769          | 769        | 69.8     | 60 - 85   |

## Spaghetti plot

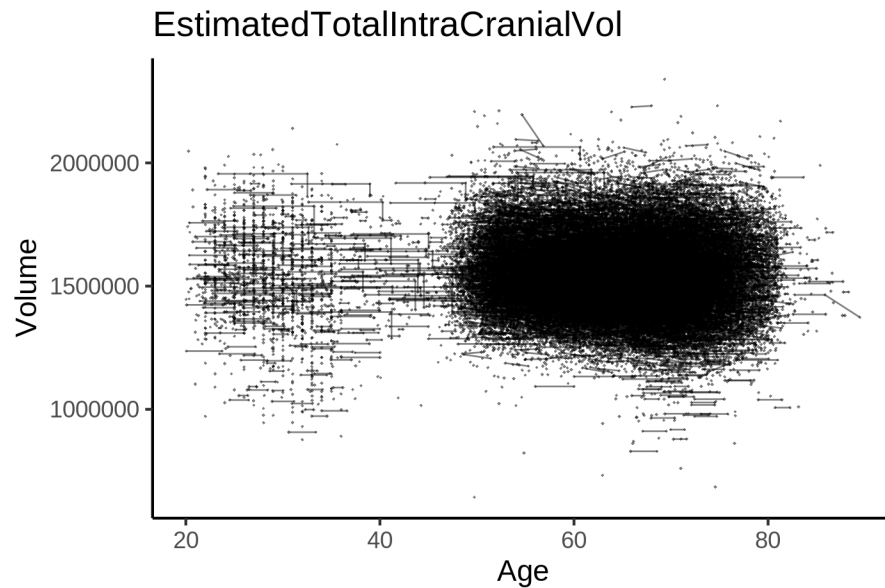

## Models Controlling for ICV

### Model outputs

Model without sleep term

```
##
## Family: gaussian
## Link function: identity
##
## Formula:
## value ~ sex + site + s(age_z, k = 10, bs = "cr")
## <environment: 0x558ad6bc7f48>
##
## Parametric coefficients:
##              Estimate Std. Error t value Pr(>|t|)
## (Intercept)  1443795     5748 251.179 < 2e-16 ***
## sexmale      180533      1190 151.639 < 2e-16 ***
## siteMPIB     -245193     8372 -29.286 < 2e-16 ***
## siteousAvanto  66386     6467  10.265 < 2e-16 ***
## siteousPrisma  97945     9270  10.565 < 2e-16 ***
## siteousSkyra   10263     6458   1.589 0.112033
## siteUB        -33005    21265 -1.552 0.120654
## siteUCAM       19146     7206   2.657 0.007890 **
## siteUKB        19392     5863   3.307 0.000942 ***
## siteUmU       -51384     9450 -5.437 5.43e-08 ***
## siteUOXF      -22646     7479 -3.028 0.002462 **
## ---
## Signif. codes:  0 '***' 0.001 '**' 0.01 '*' 0.05 '.' 0.1 ' ' 1
##
## Approximate significance of smooth terms:
```

```
##           edf Ref.df      F p-value
## s(age_z) 6.822  6.822 78.66 <2e-16 ***
## ---
## Signif. codes:  0 '***' 0.001 '**' 0.01 '*' 0.05 '.' 0.1 ' ' 1
##
## R-sq.(adj) =  0.35
## lmer.REML = 1.3347e+06  Scale est. = 1.5253e+08  n = 51289
```

Model with only main effects of age and sleep

```
##
## Family: gaussian
## Link function: identity
##
## Formula:
## value ~ sex + site + s(age_z, k = 10, bs = "cr") + s(sleep_z,
##           k = 5, bs = "cr")
## <environment: 0x558ad6bc7f48>
```

```
## Parametric coefficients:
##           Estimate Std. Error t value Pr(>|t|)
## (Intercept)  1446700      5752 251.535 < 2e-16 ***
## sexmale      180150       1190 151.405 < 2e-16 ***
## siteMPIB     -246504      8367 -29.462 < 2e-16 ***
## siteousAvanto  64476      6463  9.976 < 2e-16 ***
## siteousPrisma  96173      9265 10.380 < 2e-16 ***
## siteousSkyra   8314      6454  1.288 0.19765
## siteUB        -32065     21241 -1.510 0.13116
## siteUCAM      18573      7200  2.580 0.00989 **
## siteUKB       16522      5866  2.816 0.00486 **
## siteUmU       -55183      9460 -5.833 5.46e-09 ***
## siteUOXF      -23711      7473 -3.173 0.00151 **
```

```
## ---
## Signif. codes:  0 '***' 0.001 '**' 0.01 '*' 0.05 '.' 0.1 ' ' 1
##
```

```
## Approximate significance of smooth terms:
```

```
##           edf Ref.df      F p-value
## s(age_z)  6.850  6.850 77.75 <2e-16 ***
## s(sleep_z) 3.622  3.622 30.13 <2e-16 ***
```

```
## ---
## Signif. codes:  0 '***' 0.001 '**' 0.01 '*' 0.05 '.' 0.1 ' ' 1
##
```

```
## R-sq.(adj) =  0.352
## lmer.REML = 1.3346e+06  Scale est. = 1.5253e+08  n = 51289
```

Model with full interaction between age and sleep

```
##
## Family: gaussian
## Link function: identity
##
## Formula:
## value ~ sex + site + t2(age_z, sleep_z, k = c(10, 4), bs = "cr")
## <environment: 0x558ad6bc7f48>
```

```
##
## Parametric coefficients:
```

```

##           Estimate Std. Error t value Pr(>|t|)
## (Intercept)  1447712      5782 250.401 < 2e-16 ***
## sexmale      180398       1192 151.370 < 2e-16 ***
## siteMPIB     -248528      8403 -29.577 < 2e-16 ***
## siteousAvanto  63187       6502   9.718 < 2e-16 ***
## siteousPrisma  94488       9293  10.167 < 2e-16 ***
## siteousSkyra   6842       6494   1.054 0.292060
## siteUB        -34496     21254  -1.623 0.104583
## siteUCAM      16386       7238   2.264 0.023578 *
## siteUKB       15423       5897   2.616 0.008909 **
## siteUmU       -56423      9489  -5.946 2.76e-09 ***
## siteUOXF      -25742      7505  -3.430 0.000604 ***
## ---
## Signif. codes:  0 '***' 0.001 '**' 0.01 '*' 0.05 '.' 0.1 ' ' 1
##
## Approximate significance of smooth terms:
##           edf Ref.df      F p-value
## t2(age_z,sleep_z) 13.63 13.63 5.027 <2e-16 ***
## ---
## Signif. codes:  0 '***' 0.001 '**' 0.01 '*' 0.05 '.' 0.1 ' ' 1
##
## R-sq.(adj) =  0.352
## lmer.REML = 1.3346e+06  Scale est. = 1.5249e+08  n = 51289

```

## Model comparison

`mod_no_sleep` refers to model without sleep term, `mod_no_interaction` refers to model with only main effect of sleep, and `mod_full` refers to model with a full interaction between age and sleep. This is a nested model comparison, and the p-value at a given line refers to comparing the model at the line to the model on the line above. Hence, significance implies that the more complicated model is supported on statistical grounds.

To be even more specific, the p-value on the second row tests whether there is an association between sleep and volume. The p-value on the third row tests whether this association depends on age.

```

## Data: NULL
## Models:
## ml$mod_no_sleep$mer: NULL
## ml$mod_no_interaction$mer: NULL
## ml$mod_full$mer: NULL
##           npar      AIC      BIC logLik deviance Chisq Df Pr(>Chisq)
## ml$mod_no_sleep$mer      15 1334752 1334885 -667361 1334722
## ml$mod_no_interaction$mer  17 1334654 1334804 -667310 1334620 102 2 <2e-16 ***
## ml$mod_full$mer          19 1334668 1334836 -667315 1334630 0 2 1
## ---
## Signif. codes:  0 '***' 0.001 '**' 0.01 '*' 0.05 '.' 0.1 ' ' 1

```

We chose the model based on the likelihood ratio test with 5 % significance level, which was `mod_no_interaction`.

## Lifespan brain trajectory

The trajectory shown is from the chosen model `mod_no_interaction`.



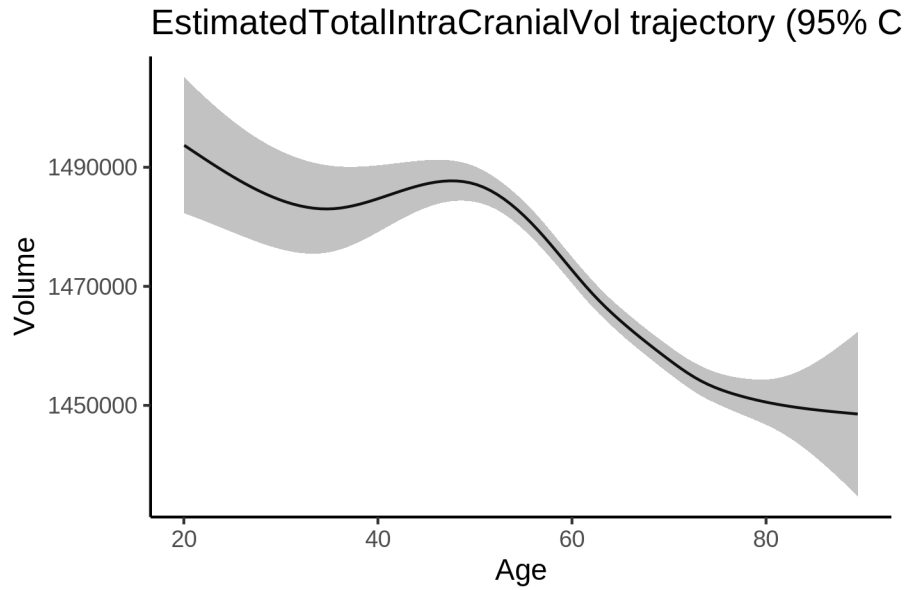

#### Effect of sleep

The chosen model only included the main effect of sleep, and hence the effect does not vary with age. The black dot shows the average sleep duration across all ages in the sample.

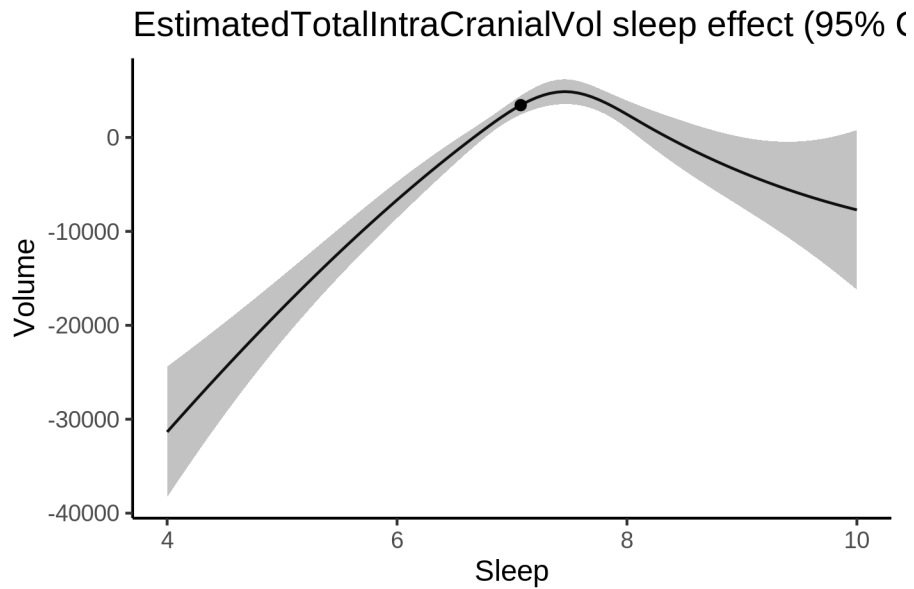

We also show the full interaction model for completeness, although it was not selected.

### EstimatedTotalIntraCranialVol sleep effect (95% CIs)

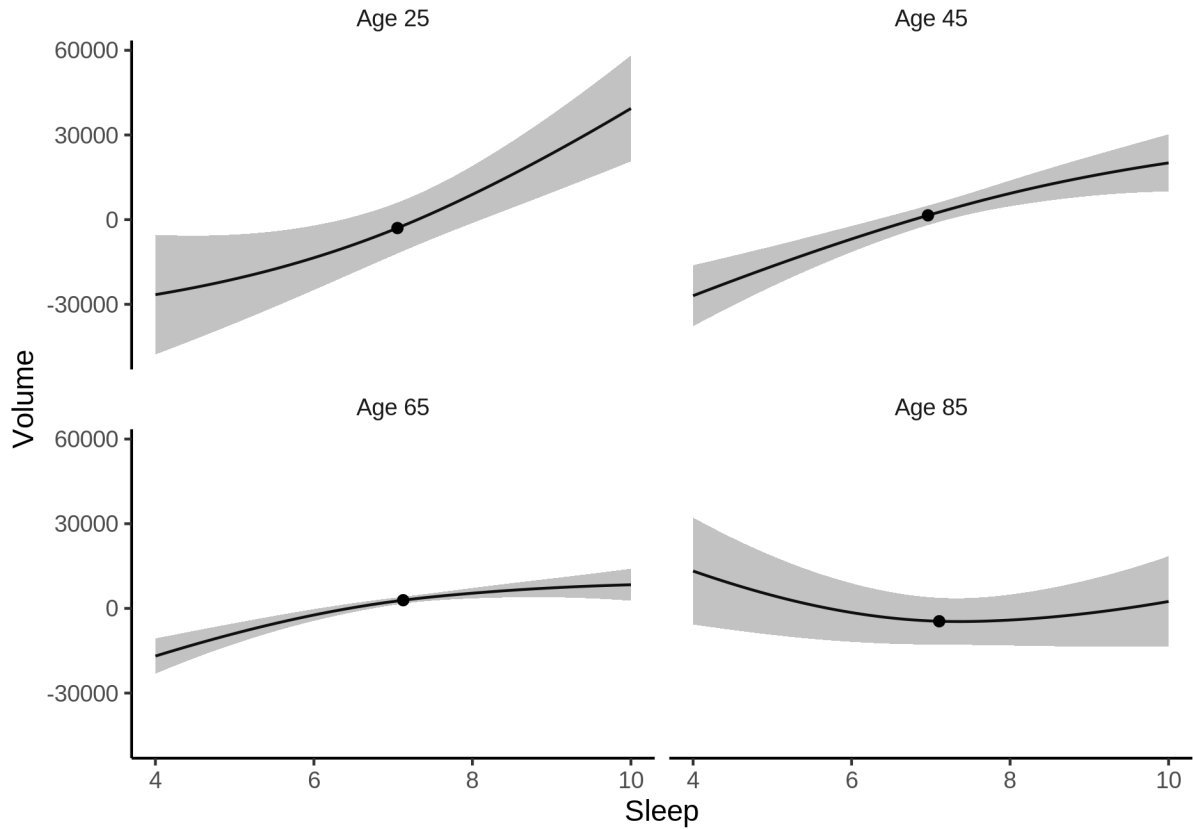

### Deviation from sleep associated with maximal volume

Model with only main effect of sleep was chosen, so we show it for all ages at once. Maximum volume is attained at 7.5 hours of sleep. The percentage values in the plot are calculated as follows: The maximum at 100 % refers to a person at an arbitrary age with a sleep duration associated with maximum volume. For a female, this volume is 1472521 and for a male it is 1652671. The other percentage values show how large the expected volume is for someone with other sleep durations. For example, 99 % implies a 1 % reduction.

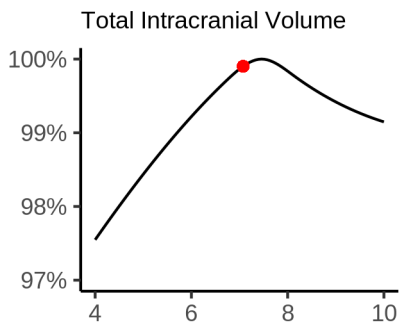

### Comparison of mean sleep and sleep associated with maximum volume

A 95 % confidence interval for the sleep associated with maximum volume is [7.39, 7.58].

The plot below compares average sleep to the sleep associated with maximum volume.

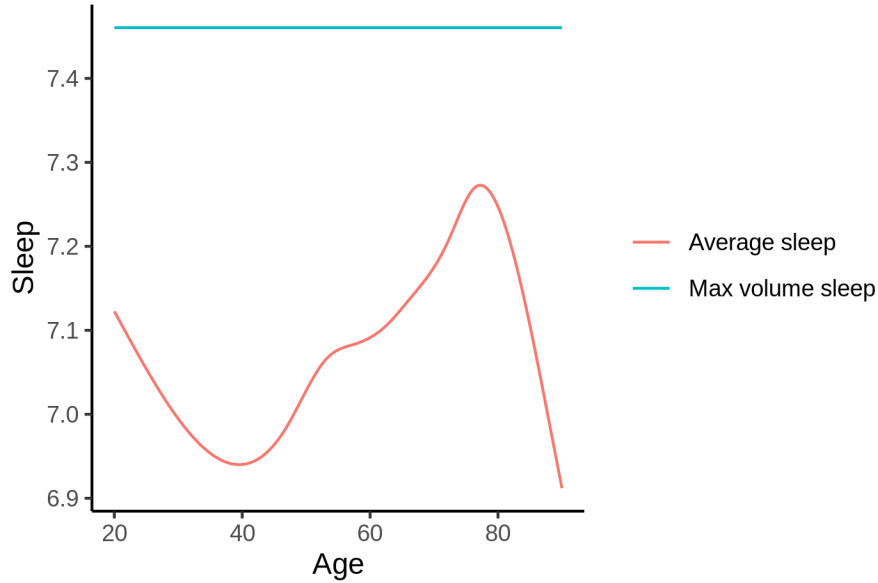

The next plot shows the difference between average sleep and sleep associated with maximum volume. The shaded region is a 95 % confidence interval.

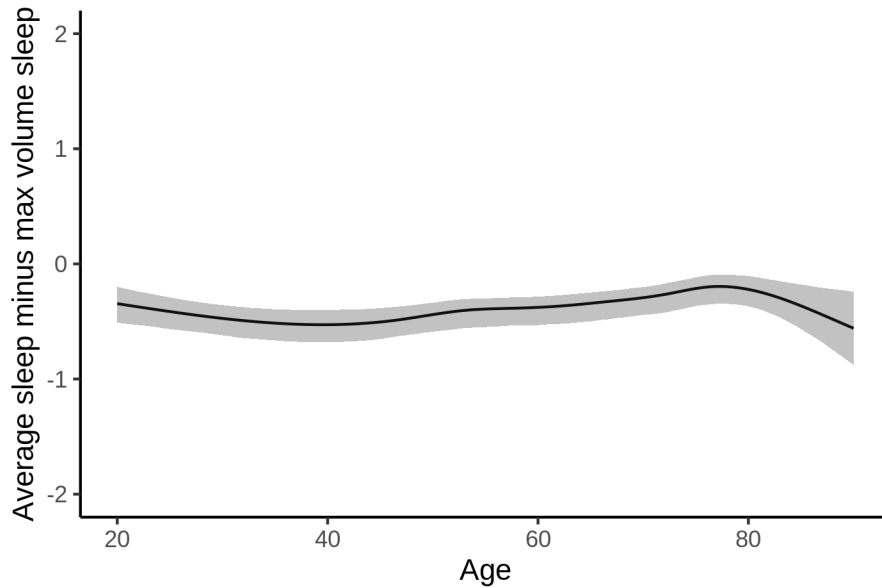

The next plot shows the probability that the sleep duration associated with maximum volume is longer than the average sleep duration, as a function of age. Probability below .05 can be interpreted as evidence that the sleep associated with maximum volume is shorter than the mean sleep, and probability above .95 can be interpreted the opposite way.

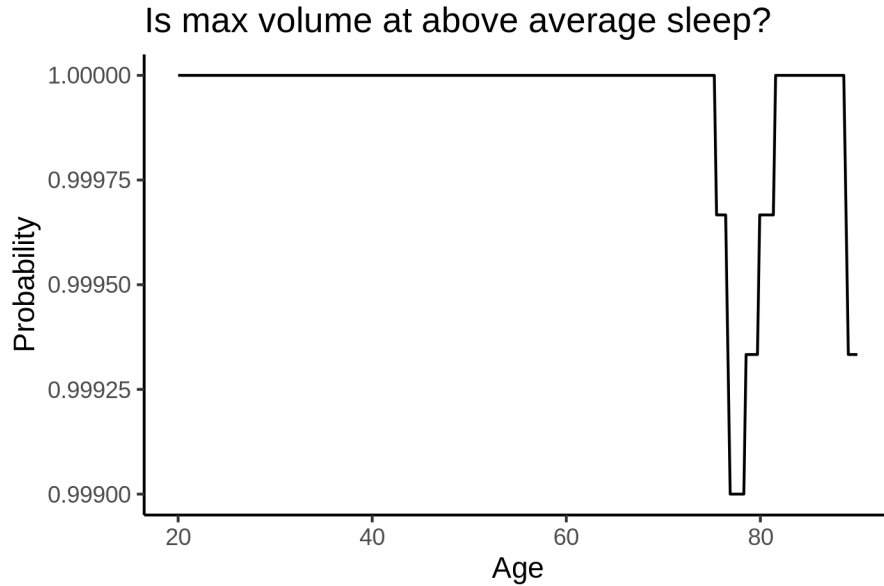

## Controlling for covariates

Below is the output for a model in which we only include data with income and education.

```
##
## Family: gaussian
## Link function: identity
##
## Formula:
## value ~ sex + site + s(age_z, k = 10, bs = "cr") + s(sleep_z,
##   k = 5, bs = "cr")
## <environment: 0x558ada633e00>
##
## Parametric coefficients:
##               Estimate Std. Error t value Pr(>|t|)
## (Intercept)  1170189    16243    72.04  <2e-16 ***
## sexmale      177837     1484   119.86  <2e-16 ***
## siteousAvanto 330643    18015   18.35  <2e-16 ***
## siteousPrisma 338578    19048   17.77  <2e-16 ***
## siteousSkyra  266856    17662   15.11  <2e-16 ***
## siteUKB      297548    16250   18.31  <2e-16 ***
## siteUOXF     217283    18377   11.82  <2e-16 ***
## ---
## Signif. codes:  0 '***' 0.001 '**' 0.01 '*' 0.05 '.' 0.1 ' ' 1
##
## Approximate significance of smooth terms:
##               edf Ref.df   F p-value
## s(age_z)      6.580  6.580 63.34  <2e-16 ***
## s(sleep_z)    3.619  3.619 19.82  <2e-16 ***
## ---
## Signif. codes:  0 '***' 0.001 '**' 0.01 '*' 0.05 '.' 0.1 ' ' 1
##
## R-sq.(adj) =  0.339
```

```
## lmer.REML = 8.1142e+05 Scale est. = 1.6633e+08 n = 31198
```

Below is the output for a model in which we control for the main effects of income and education.

```
##
## Family: gaussian
## Link function: identity
##
## Formula:
## value ~ sex + site + s(age_z, k = 10, bs = "cr") + s(sleep_z,
##     k = 5, bs = "cr") + income_scaled + education_scaled
## <environment: 0x558ada633e00>
##
## Parametric coefficients:
##           Estimate Std. Error t value Pr(>|t|)
## (Intercept)    1137576     16159   70.40 <2e-16 ***
## sexmale         175337       1482  118.34 <2e-16 ***
## siteousAvanto   326634       17882   18.27 <2e-16 ***
## siteousPrisma  331656       18908   17.54 <2e-16 ***
## siteousSkyra   262689       17524   14.99 <2e-16 ***
## siteUKB        291247       16107   18.08 <2e-16 ***
## siteUOXF       225307       18212   12.37 <2e-16 ***
## income_scaled   24950         2114   11.80 <2e-16 ***
## education_scaled 36120         2525   14.31 <2e-16 ***
## ---
## Signif. codes:  0 '***' 0.001 '**' 0.01 '*' 0.05 '.' 0.1 ' ' 1
##
## Approximate significance of smooth terms:
##           edf Ref.df    F p-value
## s(age_z)   5.906  5.906 42.96 <2e-16 ***
## s(sleep_z) 3.349  3.349 12.77 <2e-16 ***
## ---
## Signif. codes:  0 '***' 0.001 '**' 0.01 '*' 0.05 '.' 0.1 ' ' 1
##
## R-sq.(adj) =  0.35
## lmer.REML = 8.1092e+05 Scale est. = 1.6785e+08 n = 31198
```

We also included interaction effects between sleep duration and education and income, in another model. The output is shown below, and the interaction terms are `income_scaled:sleep_z` and `education_scaled:sleep_z`.

```
##
## Family: gaussian
## Link function: identity
##
## Formula:
## value ~ sex + site + s(age_z, k = 10, bs = "cr") + s(sleep_z,
##     k = 5, bs = "cr") + income_scaled + education_scaled + income_scaled:sleep_z +
##     education_scaled:sleep_z
## <environment: 0x558ada633e00>
##
## Parametric coefficients:
##           Estimate Std. Error t value Pr(>|t|)
## (Intercept)    1137216     16159   70.378 <2e-16 ***
## sexmale         175397       1483  118.288 <2e-16 ***
## siteousAvanto   326930       17881   18.283 <2e-16 ***
```

```

## siteousPrisma          332110      18908  17.564  <2e-16 ***
## siteousSkyra           262985      17524  15.007  <2e-16 ***
## siteUKB                 291707      16107  18.110  <2e-16 ***
## siteUOXF                226094      18216  12.412  <2e-16 ***
## income_scaled           24872        2115  11.761  <2e-16 ***
## education_scaled        36199        2525  14.336  <2e-16 ***
## income_scaled:sleep_z   1292         2142   0.603  0.5465
## education_scaled:sleep_z -5869         2460  -2.386  0.0171 *
## ---
## Signif. codes:  0 '***' 0.001 '**' 0.01 '*' 0.05 '.' 0.1 ' ' 1
##
## Approximate significance of smooth terms:
##           edf Ref.df    F p-value
## s(age_z)   5.914  5.914 43.03 < 2e-16 ***
## s(sleep_z) 3.342  3.342 10.82 5.99e-08 ***
## ---
## Signif. codes:  0 '***' 0.001 '**' 0.01 '*' 0.05 '.' 0.1 ' ' 1
##
## R-sq.(adj) =  0.35
## lmer.REML = 8.1088e+05  Scale est. = 1.6783e+08  n = 31198

```

We did the same controlling for BMI. Below is the model with no covariates but only keeping data with BMI.

```

##
## Family: gaussian
## Link function: identity
##
## Formula:
## value ~ sex + site + s(age_z, k = 10, bs = "cr") + s(sleep_z,
##           k = 5, bs = "cr")
## <environment: 0x558ad7a13438>
##
## Parametric coefficients:
##           Estimate Std. Error t value Pr(>|t|)
## (Intercept)  1503984      7265 207.027 < 2e-16 ***
## sexmale      178117       1430 124.570 < 2e-16 ***
## siteousPrisma  28500       8342   3.416 0.000636 ***
## siteousSkyra -61544       3176 -19.378 < 2e-16 ***
## siteUCAM     -39016       8475  -4.604 4.16e-06 ***
## siteUKB      -36357       7359  -4.941 7.83e-07 ***
## siteUmU     -112001      10365 -10.805 < 2e-16 ***
## ---
## Signif. codes:  0 '***' 0.001 '**' 0.01 '*' 0.05 '.' 0.1 ' ' 1
##
## Approximate significance of smooth terms:
##           edf Ref.df    F p-value
## s(age_z)   6.208  6.208 73.14 <2e-16 ***
## s(sleep_z) 3.507  3.507 23.24 <2e-16 ***
## ---
## Signif. codes:  0 '***' 0.001 '**' 0.01 '*' 0.05 '.' 0.1 ' ' 1
##
## R-sq.(adj) =  0.338
## lmer.REML = 8.6864e+05  Scale est. = 1.4743e+08  n = 33453

```

Below is the model output with main effect.

```

##
## Family: gaussian
## Link function: identity
##
## Formula:
## value ~ sex + site + s(age_z, k = 10, bs = "cr") + s(sleep_z,
##     k = 5, bs = "cr") + bmi
## <environment: 0x558ad7a13438>
##
## Parametric coefficients:
##           Estimate Std. Error t value Pr(>|t|)
## (Intercept) 1482076.0    8408.4 176.261 < 2e-16 ***
## sexmale     177266.3     1438.7 123.214 < 2e-16 ***
## siteousPrisma 28222.8    8341.9   3.383 0.000717 ***
## siteousSkyra -61511.1    3176.0 -19.367 < 2e-16 ***
## siteUCAM     -39578.2    8472.2  -4.672 3.00e-06 ***
## siteUKB      -37344.3    7358.1  -5.075 3.89e-07 ***
## siteUmU      -113078.3   10363.2 -10.912 < 2e-16 ***
## bmi          882.5       170.8   5.167 2.39e-07 ***
## ---
## Signif. codes:  0 '***' 0.001 '**' 0.01 '*' 0.05 '.' 0.1 ' ' 1
##
## Approximate significance of smooth terms:
##           edf Ref.df    F p-value
## s(age_z)   6.187  6.187 73.18 <2e-16 ***
## s(sleep_z) 3.539  3.539 25.12 <2e-16 ***
## ---
## Signif. codes:  0 '***' 0.001 '**' 0.01 '*' 0.05 '.' 0.1 ' ' 1
##
## R-sq.(adj) =  0.338
## lmer.REML = 8.686e+05  Scale est. = 1.4745e+08  n = 33453

```

Next is the model with BMI-sleep interaction.

```

##
## Family: gaussian
## Link function: identity
##
## Formula:
## value ~ sex + site + s(age_z, k = 10, bs = "cr") + s(sleep_z,
##     k = 5, bs = "cr") + bmi + bmi:sleep_z
## <environment: 0x558ad7a13438>
##
## Parametric coefficients:
##           Estimate Std. Error t value Pr(>|t|)
## (Intercept) 1482526.6    8414.7 176.184 < 2e-16 ***
## sexmale     177247.2     1438.7 123.198 < 2e-16 ***
## siteousPrisma 28217.7    8342.0   3.383 0.000719 ***
## siteousSkyra -61524.0    3176.0 -19.371 < 2e-16 ***
## siteUCAM     -39701.0    8472.5  -4.686 2.80e-06 ***
## siteUKB      -37461.8    7358.3  -5.091 3.58e-07 ***
## siteUmU      -113161.1   10363.1 -10.920 < 2e-16 ***
## bmi          874.3       170.9   5.116 3.15e-07 ***
## bmi:sleep_z  -223.3       162.6  -1.373 0.169745
## ---

```

```

## Signif. codes:  0 '***' 0.001 '**' 0.01 '*' 0.05 '.' 0.1 ' ' 1
##
## Approximate significance of smooth terms:
##           edf Ref.df    F p-value
## s(age_z)   6.182  6.182 73.0 <2e-16 ***
## s(sleep_z) 3.549  3.549 17.5 <2e-16 ***
## ---
## Signif. codes:  0 '***' 0.001 '**' 0.01 '*' 0.05 '.' 0.1 ' ' 1
##
## R-sq.(adj) =  0.338
## lmer.REML = 8.6858e+05  Scale est. = 1.4745e+08  n = 33453

```

We did the same controlling for depression. Below is the model with no covariates but only keeping data with depression.

```

##
## Family: gaussian
## Link function: identity
##
## Formula:
## value ~ sex + site + s(age_z, k = 10, bs = "cr") + s(sleep_z,
##           k = 5, bs = "cr")
## <environment: 0x558a4613f810>
##
## Parametric coefficients:
##           Estimate Std. Error t value Pr(>|t|)
## (Intercept)  1226926      8272  148.33 <2e-16 ***
## sexmale      178444       1436  124.30 <2e-16 ***
## siteousAvanto 272632     12544   21.73 <2e-16 ***
## siteousPrisma 285879     13410   21.32 <2e-16 ***
## siteousSkyra  210583     11514   18.29 <2e-16 ***
## siteUCAM     247976     11372   21.81 <2e-16 ***
## siteUKB      240213      8262   29.08 <2e-16 ***
## siteUmU      167224     11266   14.84 <2e-16 ***
## ---
## Signif. codes:  0 '***' 0.001 '**' 0.01 '*' 0.05 '.' 0.1 ' ' 1
##
## Approximate significance of smooth terms:
##           edf Ref.df    F p-value
## s(age_z)   6.397  6.397 71.05 <2e-16 ***
## s(sleep_z) 3.438  3.438 21.74 <2e-16 ***
## ---
## Signif. codes:  0 '***' 0.001 '**' 0.01 '*' 0.05 '.' 0.1 ' ' 1
##
## R-sq.(adj) =  0.357
## lmer.REML = 8.658e+05  Scale est. = 1.4235e+08  n = 33365

```

Below is the model output with main effect.

```

##
## Family: gaussian
## Link function: identity
##
## Formula:
## value ~ sex + site + s(age_z, k = 10, bs = "cr") + s(sleep_z,
##           k = 5, bs = "cr") + depression

```



```

## <environment: 0x558a4613f810>
##
## Parametric coefficients:
##           Estimate Std. Error t value Pr(>|t|)
## (Intercept)  1225404      8303 147.579 <2e-16 ***
## sexmale      178594       1437 124.250 <2e-16 ***
## siteousAvanto 271638     12549  21.645 <2e-16 ***
## siteousPrisma 284868     13416  21.234 <2e-16 ***
## siteousSkyra  209525     11521  18.187 <2e-16 ***
## siteUCAM      247479     11373  21.761 <2e-16 ***
## siteUKB       240796      8266  29.132 <2e-16 ***
## siteUmU       162259     11511  14.096 <2e-16 ***
## depression    13159       6289   2.092  0.0364 *
## ---
## Signif. codes:  0 '***' 0.001 '**' 0.01 '*' 0.05 '.' 0.1 ' ' 1
##
## Approximate significance of smooth terms:
##           edf Ref.df    F p-value
## s(age_z)   6.369  6.369 68.46 <2e-16 ***
## s(sleep_z) 3.462  3.462 22.55 <2e-16 ***
## ---
## Signif. codes:  0 '***' 0.001 '**' 0.01 '*' 0.05 '.' 0.1 ' ' 1
##
## R-sq.(adj) =  0.357
## lmer.REML = 8.6578e+05  Scale est. = 1.4238e+08  n = 33365

```

Next is the model with depression-sleep interaction.

```

##
## Family: gaussian
## Link function: identity
##
## Formula:
## value ~ sex + site + s(age_z, k = 10, bs = "cr") + s(sleep_z,
##           k = 5, bs = "cr") + depression + depression:sleep_z
## <environment: 0x558a4613f810>
##
## Parametric coefficients:
##           Estimate Std. Error t value Pr(>|t|)
## (Intercept)  1225403      8304 147.577 <2e-16 ***
## sexmale      178609       1438 124.232 <2e-16 ***
## siteousAvanto 271716     12550  21.650 <2e-16 ***
## siteousPrisma 284949     13417  21.238 <2e-16 ***
## siteousSkyra  209600     11522  18.191 <2e-16 ***
## siteUCAM      247585     11375  21.766 <2e-16 ***
## siteUKB       240790      8266  29.131 <2e-16 ***
## siteUmU       161488     11616  13.902 <2e-16 ***
## depression    13368       6303   2.121  0.0339 *
## depression:sleep_z  2324      4695   0.495  0.6206
## ---
## Signif. codes:  0 '***' 0.001 '**' 0.01 '*' 0.05 '.' 0.1 ' ' 1
##
## Approximate significance of smooth terms:
##           edf Ref.df    F p-value
## s(age_z)   6.368  6.368 68.46 <2e-16 ***

```

```

## s(sleep_z) 3.447 3.447 19.25 <2e-16 ***
## ---
## Signif. codes: 0 '***' 0.001 '**' 0.01 '*' 0.05 '.' 0.1 ' ' 1
##
## R-sq.(adj) = 0.357
## lmer.REML = 8.6576e+05 Scale est. = 1.4238e+08 n = 33365

```

The plot below shows the sleep-volume curve for the original model and for the model with main effects of SES.

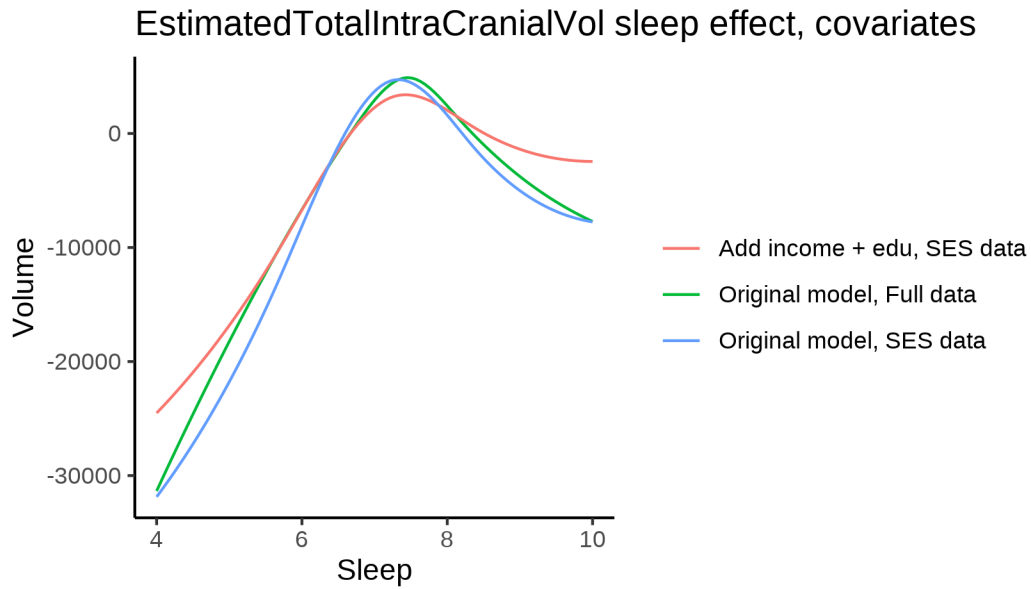

The plot below shows the sleep-volume curve for the original model and for the model with main effects of BMI.

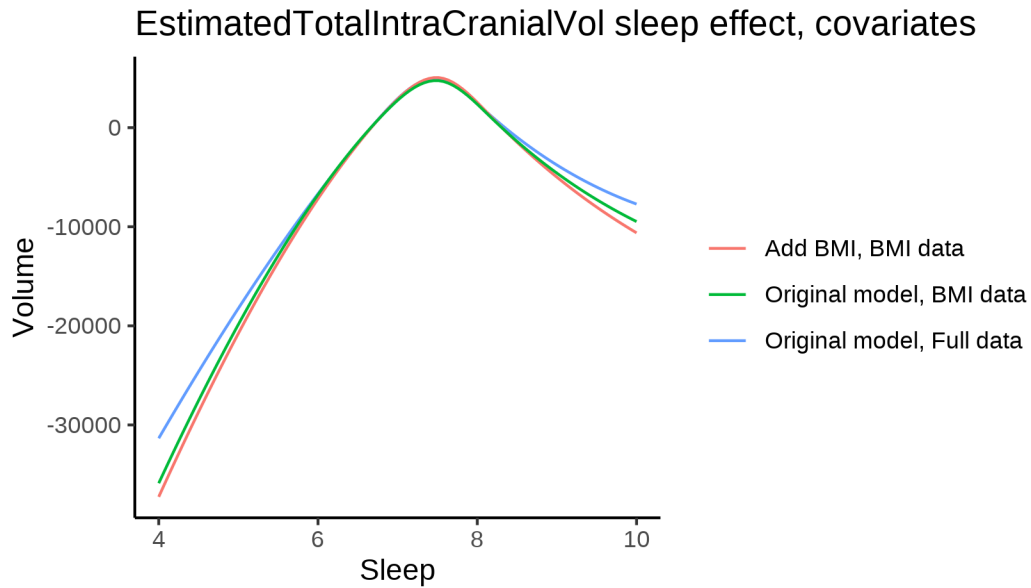

The plot below shows the sleep-volume curve for the original model and for the model with main effects of depression.

### EstimatedTotalIntraCranialVol sleep effect, covariates

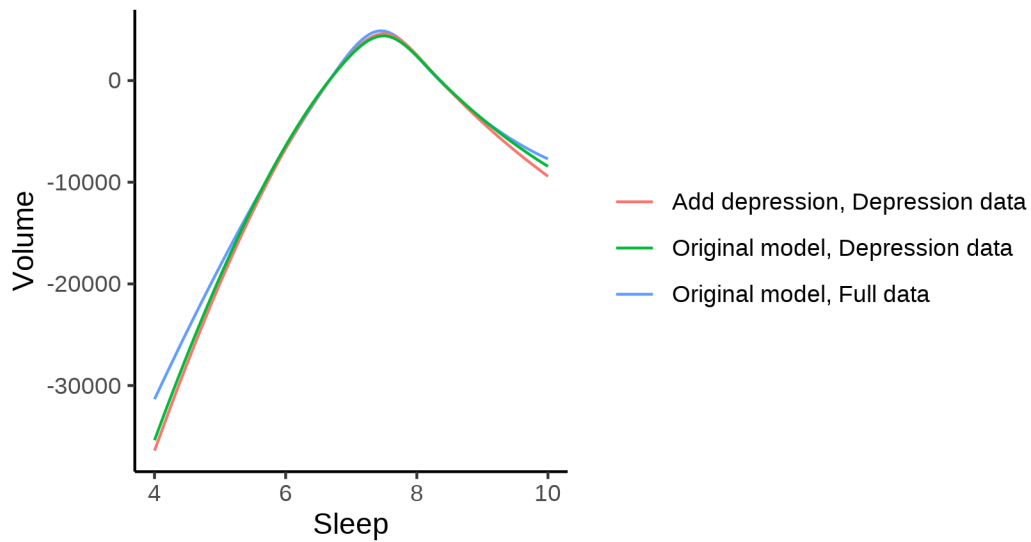

### Models Not controlling for ICV

#### Model outputs

Model without sleep term

```
##
## Family: gaussian
## Link function: identity
##
## Formula:
## value ~ sex + site + s(age_z, k = 10, bs = "cr")
## <environment: 0x558ad7ef87a8>
##
## Parametric coefficients:
##              Estimate Std. Error t value Pr(>|t|)
## (Intercept)  1443795      5748  251.179 < 2e-16 ***
## sexmale      180533       1190  151.639 < 2e-16 ***
## siteMPIB     -245193      8372  -29.286 < 2e-16 ***
## siteousAvanto  66386      6467   10.265 < 2e-16 ***
## siteousPrisma  97945      9270   10.565 < 2e-16 ***
## siteousSkyra  10263      6458    1.589 0.112033
## siteUB       -33005     21265  -1.552 0.120654
## siteUCAM     19146      7206    2.657 0.007890 **
## siteUKB      19392      5863    3.307 0.000942 ***
## siteUmU      -51384     9450  -5.437 5.43e-08 ***
## siteUOXF     -22646     7479  -3.028 0.002462 **
## ---
## Signif. codes:  0 '***' 0.001 '**' 0.01 '*' 0.05 '.' 0.1 ' ' 1
##
## Approximate significance of smooth terms:
##              edf Ref.df    F p-value
## s(age_z)    6.822  6.822 78.66 <2e-16 ***
```

```
## ---
## Signif. codes:  0 '***' 0.001 '**' 0.01 '*' 0.05 '.' 0.1 ' ' 1
##
## R-sq.(adj) =  0.35
## lmer.REML = 1.3347e+06  Scale est. = 1.5253e+08  n = 51289
```

Model with only main effects of age and sleep

```
##
## Family: gaussian
## Link function: identity
##
## Formula:
## value ~ sex + site + s(age_z, k = 10, bs = "cr") + s(sleep_z,
##       k = 5, bs = "cr")
## <environment: 0x558ad7ef87a8>
##
## Parametric coefficients:
##           Estimate Std. Error t value Pr(>|t|)
## (Intercept)  1446700      5752 251.535 < 2e-16 ***
## sexmale      180150       1190 151.405 < 2e-16 ***
## siteMPIB     -246504      8367 -29.462 < 2e-16 ***
## siteousAvanto  64476      6463  9.976 < 2e-16 ***
## siteousPrisma  96173      9265 10.380 < 2e-16 ***
## siteousSkyra   8314      6454  1.288 0.19765
## siteUB       -32065     21241 -1.510 0.13116
## siteUCAM      18573      7200  2.580 0.00989 **
## siteUKB       16522      5866  2.816 0.00486 **
## siteUmU       -55183      9460 -5.833 5.46e-09 ***
## siteUOXF      -23711      7473 -3.173 0.00151 **
```

```
## ---
## Signif. codes:  0 '***' 0.001 '**' 0.01 '*' 0.05 '.' 0.1 ' ' 1
##
## Approximate significance of smooth terms:
##           edf Ref.df    F p-value
## s(age_z)   6.850  6.850 77.75 <2e-16 ***
## s(sleep_z) 3.622  3.622 30.13 <2e-16 ***
```

```
## ---
## Signif. codes:  0 '***' 0.001 '**' 0.01 '*' 0.05 '.' 0.1 ' ' 1
##
## R-sq.(adj) =  0.352
## lmer.REML = 1.3346e+06  Scale est. = 1.5253e+08  n = 51289
```

Model with full interaction between age and sleep

```
##
## Family: gaussian
## Link function: identity
##
## Formula:
## value ~ sex + site + t2(age_z, sleep_z, k = c(10, 4), bs = "cr")
## <environment: 0x558ad7ef87a8>
##
## Parametric coefficients:
##           Estimate Std. Error t value Pr(>|t|)
## (Intercept)  1447712      5782 250.401 < 2e-16 ***
```

```

## sexmale          180398          1192 151.370 < 2e-16 ***
## siteMPIB         -248528          8403 -29.577 < 2e-16 ***
## siteousAvanto    63187           6502  9.718 < 2e-16 ***
## siteousPrisma    94488           9293 10.167 < 2e-16 ***
## siteousSkyra     6842            6494  1.054 0.292060
## siteUB           -34496         21254 -1.623 0.104583
## siteUCAM         16386           7238  2.264 0.023578 *
## siteUKB          15423          5897  2.616 0.008909 **
## siteUmU          -56423          9489 -5.946 2.76e-09 ***
## siteUOXF         -25742          7505 -3.430 0.000604 ***
## ---
## Signif. codes:  0 '***' 0.001 '**' 0.01 '*' 0.05 '.' 0.1 ' ' 1
##
## Approximate significance of smooth terms:
##                edf Ref.df    F p-value
## t2(age_z,sleep_z) 13.63 13.63 5.027 <2e-16 ***
## ---
## Signif. codes:  0 '***' 0.001 '**' 0.01 '*' 0.05 '.' 0.1 ' ' 1
##
## R-sq.(adj) =  0.352
## lmer.REML = 1.3346e+06  Scale est. = 1.5249e+08  n = 51289

```

## Model comparison

`mod_no_sleep` refers to model without sleep term, `mod_no_interaction` refers to model with only main effect of sleep, and `mod_full` refers to model with a full interaction between age and sleep. This is a nested model comparison, and the p-value at a given line refers to comparing the model at the line to the model on the line above. Hence, significance implies that the more complicated model is supported on statistical grounds.

To be even more specific, the p-value on the second row tests whether there is an association between sleep and volume. The p-value on the third row tests whether this association depends on age.

```

## Data: NULL
## Models:
## ml$mod_no_sleep$mer: NULL
## ml$mod_no_interaction$mer: NULL
## ml$mod_full$mer: NULL
##
##                npar      AIC      BIC  logLik deviance Chisq Df Pr(>Chisq)
## ml$mod_no_sleep$mer      15 1334752 1334885 -667361 1334722
## ml$mod_no_interaction$mer 17 1334654 1334804 -667310 1334620 102 2 <2e-16 ***
## ml$mod_full$mer          19 1334668 1334836 -667315 1334630  0 2 1
## ---
## Signif. codes:  0 '***' 0.001 '**' 0.01 '*' 0.05 '.' 0.1 ' ' 1

```

We chose the model based on the likelihood ratio test with 5 % significance level, which was `mod_no_interaction`.

## Lifespan brain trajectory

The trajectory shown is from the chosen model `mod_no_interaction_no_icv`.

EstimatedTotalIntraCranialVol trajectory (95% C

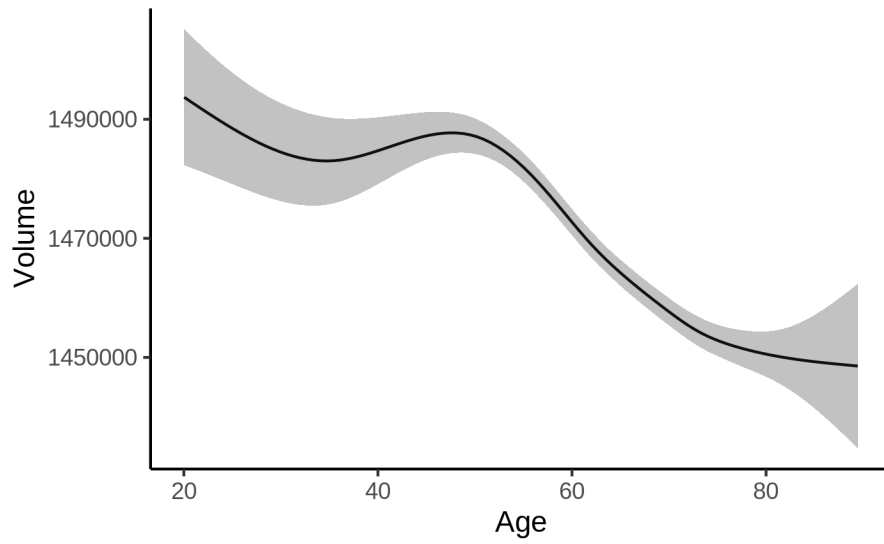

**Effect of sleep**

The chosen model only included the main effect of sleep, and hence the effect does not vary with age. The black dot shows the average sleep duration across all ages in the sample.

EstimatedTotalIntraCranialVol sleep effect (95% C

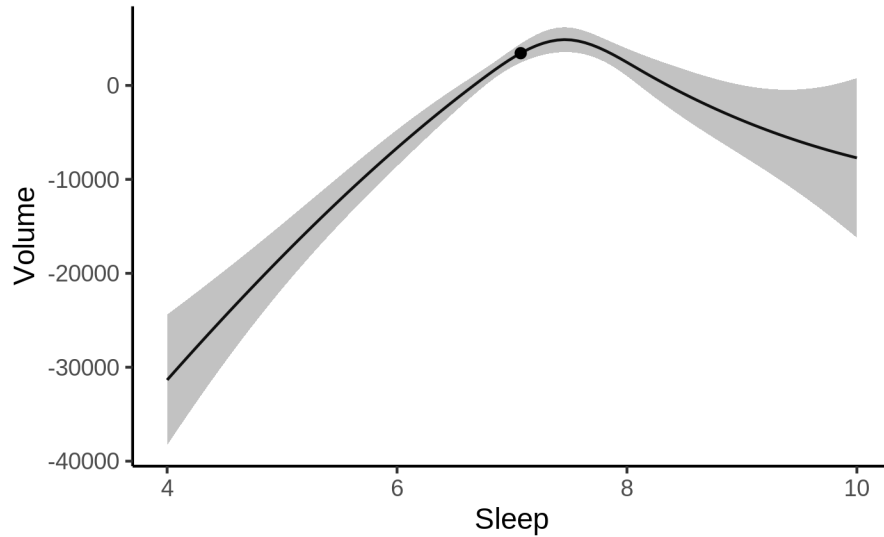

We also show the full interaction model for completeness, although it was not selected.

### EstimatedTotalIntraCranialVol sleep effect (95% CIs)

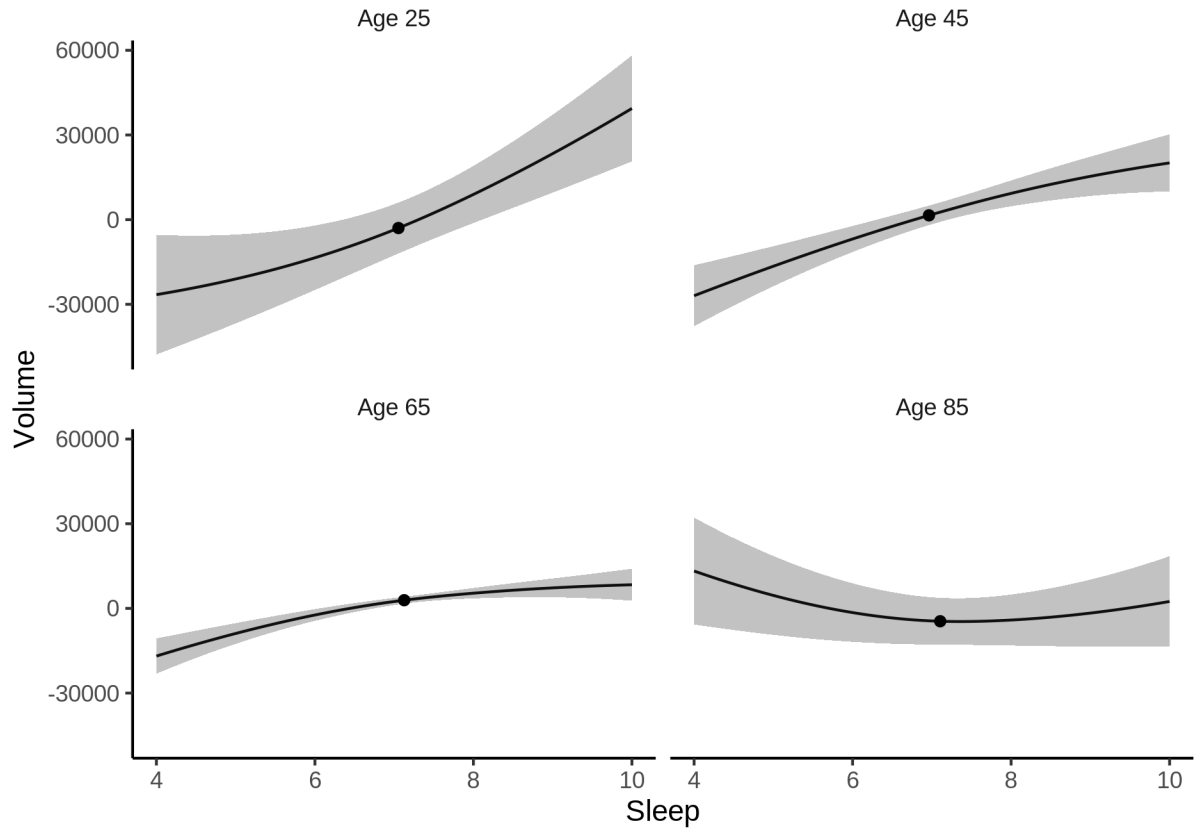

### Deviation from sleep associated with maximal volume

Model with only main effect of sleep was chosen, so we show it for all ages at once. Maximum volume is attained at 7.5 hours of sleep. The percentage values in the plot are calculated as follows: The maximum at 100 % refers to a person at an arbitrary age with a sleep duration associated with maximum volume. For a female, this volume is 1472521 and for a male it is 1652671. The other percentage values show how large the expected volume is for someone with other sleep durations. For example, 99 % implies a 1 % reduction.



### Comparison of mean sleep and sleep associated with maximum volume

A 95 % confidence interval for the sleep associated with maximum volume is [7.39, 7.58].

The plot below compares average sleep to the sleep associated with maximum volume.



The next plot shows the difference between average sleep and sleep associated with maximum volume. The shaded region is a 95 % confidence interval.

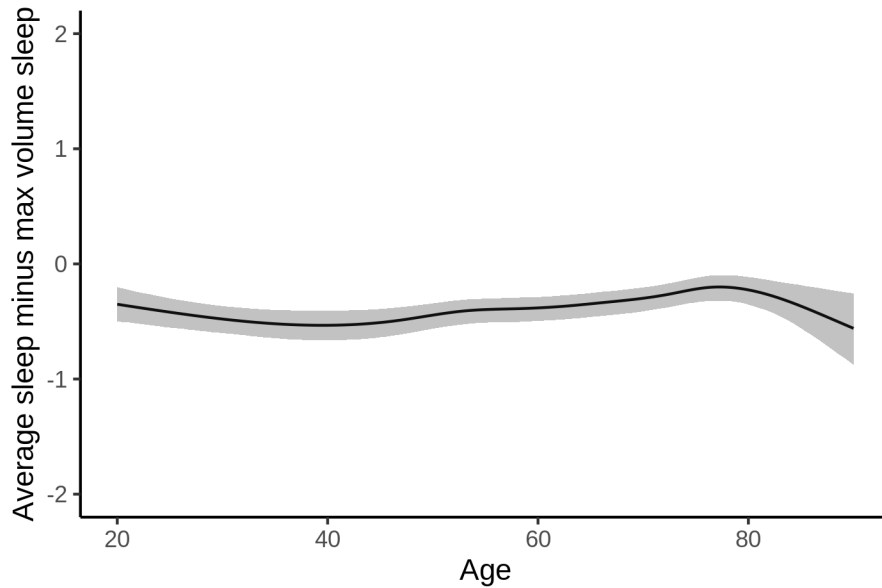

The next plot shows the probability that the sleep duration associated with maximum volume is longer than the average sleep duration, as a function of age. Probability below .05 can be interpreted as evidence that the sleep associated with maximum volume is shorter than the mean sleep, and probability above .95 can be interpreted the opposite way.



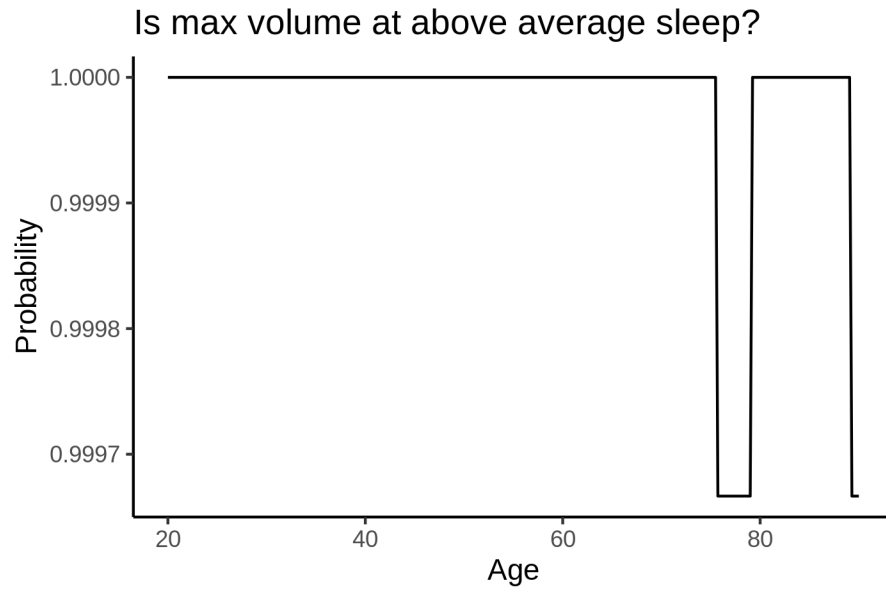

## Hippocampus

### Descriptive statistics

| Study | Observations | Unique IDs | Mean age | Age range |
|-------|--------------|------------|----------|-----------|
| HCP   | 974          | 974        | 28.8     | 22 - 37   |
| MPIB  | 677          | 391        | 63.1     | 24 - 83   |
| UB    | 113          | 39         | 70.9     | 64 - 81   |
| UCAM  | 884          | 632        | 55.1     | 20 - 88   |
| UiO   | 1475         | 803        | 49.4     | 20 - 89   |
| UKB   | 45975        | 43133      | 64.5     | 45 - 83   |
| UmU   | 412          | 279        | 62.2     | 25 - 85   |
| UOXF  | 769          | 769        | 69.8     | 60 - 85   |

## Spaghetti plot

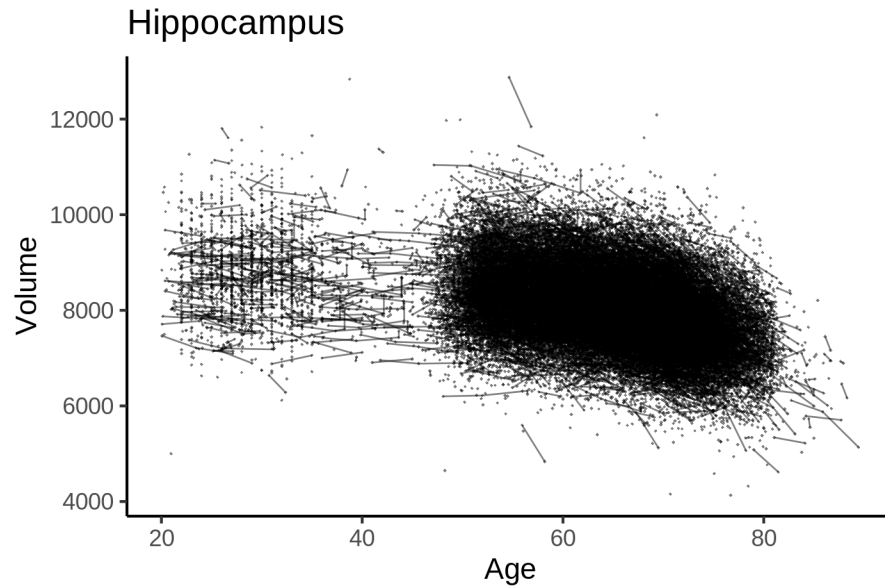

## Models Controlling for ICV

### Model outputs

Model without sleep term

```
##
## Family: gaussian
## Link function: identity
##
## Formula:
## value ~ sex + site + icv + s(age_z, k = 10, bs = "cr")
## <environment: 0x5589769b2d88>
##
## Parametric coefficients:
##              Estimate Std. Error t value Pr(>|t|)
## (Intercept)  8113.326    34.449  235.518 < 2e-16 ***
## sexmale      122.795     7.124   17.236 < 2e-16 ***
## siteMPIB     274.609    44.378   6.188 6.14e-10 ***
## siteousAvanto -490.715    35.048 -14.001 < 2e-16 ***
## siteousPrisma -92.809    59.127  -1.570 0.11650
## siteousSkyra -193.298    33.728  -5.731 1.00e-08 ***
## siteUB       -139.796   105.037  -1.331 0.18322
## siteUCAM     -104.409    38.396  -2.719 0.00655 **
## siteUKB      -103.256    35.313  -2.924 0.00346 **
## siteUmU      -102.548    49.729  -2.062 0.03920 *
## siteUOXF     -304.011    41.979  -7.242 4.48e-13 ***
## icv          395.980     3.577  110.698 < 2e-16 ***
## ---
## Signif. codes:  0 '***' 0.001 '**' 0.01 '*' 0.05 '.' 0.1 ' ' 1
##
```

```

## Approximate significance of smooth terms:
##           edf Ref.df      F p-value
## s(age_z) 7.951  7.951 1516 <2e-16 ***
## ---
## Signif. codes:  0 '***' 0.001 '**' 0.01 '*' 0.05 '.' 0.1 ' ' 1
##
## R-sq.(adj) =  0.423
## lmer.REML = 7.9696e+05  Scale est. = 22402      n = 51279

Model with only main effects of age and sleep

##
## Family: gaussian
## Link function: identity
##
## Formula:
## value ~ sex + site + icv + s(age_z, k = 10, bs = "cr") + s(sleep_z,
##           k = 5, bs = "cr")
## <environment: 0x5589769b2d88>
##
## Parametric coefficients:
##           Estimate Std. Error t value Pr(>|t|)
## (Intercept)  8109.595     34.474 235.238 < 2e-16 ***
## sexmale       122.387       7.122  17.185 < 2e-16 ***
## siteMPIB      281.606      44.389   6.344 2.26e-10 ***
## siteousAvanto -489.706     35.049 -13.972 < 2e-16 ***
## siteousPrisma -92.156      59.111  -1.559 0.11899
## siteousSkyra  -192.644     33.730  -5.711 1.13e-08 ***
## siteUB        -135.503    104.990  -1.291 0.19684
## siteUCAM      -100.882     38.388  -2.628 0.00859 **
## siteUKB        -99.174     35.342  -2.806 0.00502 **
## siteUmU        -87.373     49.825  -1.754 0.07950 .
## siteUOXF      -302.332     41.970  -7.203 5.95e-13 ***
## icv           395.828       3.579 110.584 < 2e-16 ***
## ---
## Signif. codes:  0 '***' 0.001 '**' 0.01 '*' 0.05 '.' 0.1 ' ' 1
##
## Approximate significance of smooth terms:
##           edf Ref.df      F p-value
## s(age_z)   7.952  7.952 1494.16 <2e-16 ***
## s(sleep_z) 2.960  2.960   13.72 <2e-16 ***
## ---
## Signif. codes:  0 '***' 0.001 '**' 0.01 '*' 0.05 '.' 0.1 ' ' 1
##
## R-sq.(adj) =  0.424
## lmer.REML = 7.9692e+05  Scale est. = 22414      n = 51279

Model with full interaction between age and sleep

##
## Family: gaussian
## Link function: identity
##
## Formula:
## value ~ sex + site + icv + t2(age_z, sleep_z, k = c(10, 4), bs = "cr")
## <environment: 0x5589769b2d88>

```

```

##
## Parametric coefficients:
##           Estimate Std. Error t value Pr(>|t|)
## (Intercept) 8109.374   34.554 234.690 < 2e-16 ***
## sexmale     122.108    7.137  17.109 < 2e-16 ***
## siteMPIB    281.105   44.594   6.304 2.93e-10 ***
## siteousAvanto -488.933  35.229 -13.879 < 2e-16 ***
## siteousPrisma -93.748   59.244  -1.582 0.11356
## siteousSkyra -191.597  33.925  -5.648 1.64e-08 ***
## siteUB      -136.380 105.038  -1.298 0.19416
## siteUCAM    -102.202  38.565  -2.650 0.00805 **
## siteUKB     -98.794   35.418  -2.789 0.00528 **
## siteUmU     -90.416   49.946  -1.810 0.07026 .
## siteUOXF    -301.345  42.082  -7.161 8.12e-13 ***
## icv         395.882    3.578 110.633 < 2e-16 ***
## ---
## Signif. codes:  0 '***' 0.001 '**' 0.01 '*' 0.05 '.' 0.1 ' ' 1
##
## Approximate significance of smooth terms:
##           edf Ref.df    F p-value
## t2(age_z,sleep_z) 14.22 14.22 37.67 <2e-16 ***
## ---
## Signif. codes:  0 '***' 0.001 '**' 0.01 '*' 0.05 '.' 0.1 ' ' 1
##
## R-sq.(adj) = 0.424
## lmer.REML = 7.9692e+05  Scale est. = 22402    n = 51279

```

## Model comparison

mod\_no\_sleep refers to model without sleep term, mod\_no\_interaction refers to model with only main effect of sleep, and mod\_full refers to model with a full interaction between age and sleep. This is a nested model comparison, and the p-value at a given line refers to comparing the model at the line to the model on the line above. Hence, significance implies that the more complicated model is supported on statistical grounds.

To be even more specific, the p-value on the second row tests whether there is an association between sleep and volume. The p-value on the third row tests whether this association depends on age.

```

## Data: NULL
## Models:
## ml$mod_no_sleep$mer: NULL
## ml$mod_no_interaction$mer: NULL
## ml$mod_full$mer: NULL
##           npar    AIC    BIC logLik deviance  Chisq Df Pr(>Chisq)
## ml$mod_no_sleep$mer      16 796991 797132 -398479   796959
## ml$mod_no_interaction$mer  18 796960 797119 -398462   796924 34.6305  2 3.021e-08 ***
## ml$mod_full$mer          20 796963 797140 -398462   796923  1.0449  2  0.5931
## ---
## Signif. codes:  0 '***' 0.001 '**' 0.01 '*' 0.05 '.' 0.1 ' ' 1

```

We chose the model based on the likelihood ratio test with 5 % significance level, which was mod\_no\_interaction.

### Lifespan brain trajectory

The trajectory shown is from the chosen model `mod_no_interaction`.

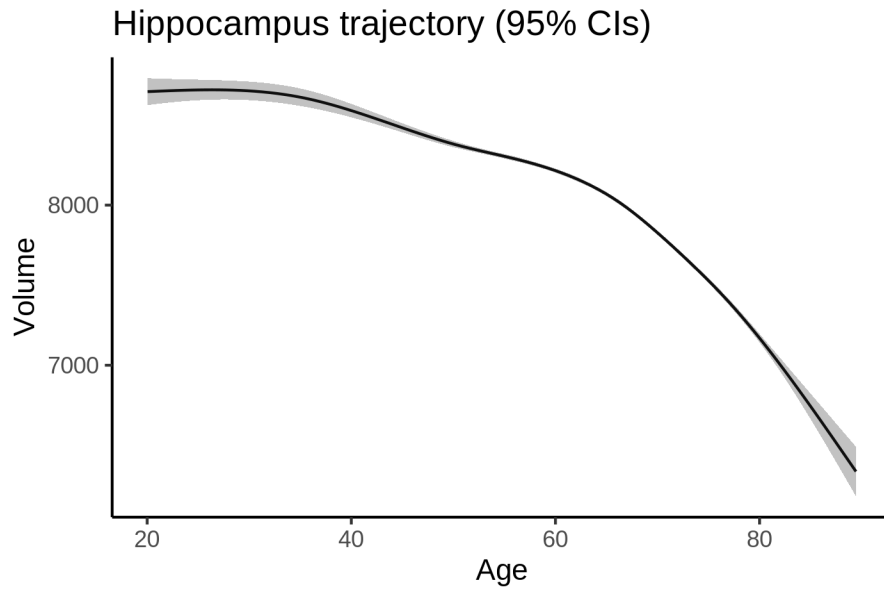

### Effect of sleep

The chosen model only included the main effect of sleep, and hence the effect does not vary with age. The black dot shows the average sleep duration across all ages in the sample.

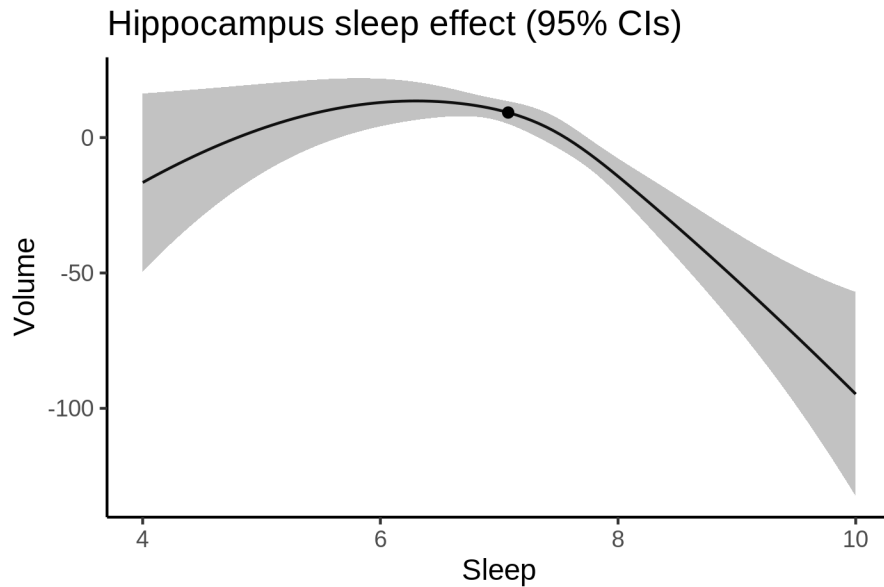

We also show the full interaction model for completeness, although it was not selected.

### Hippocampus sleep effect (95% CIs)

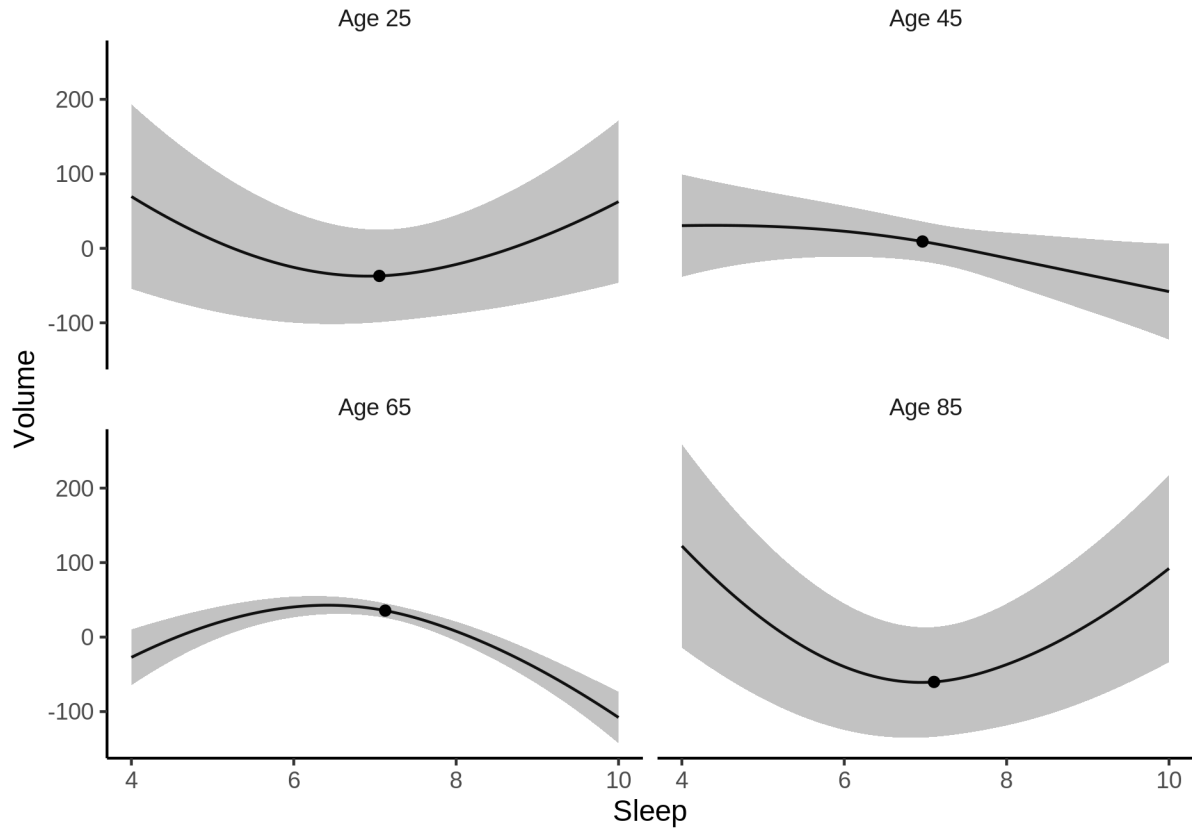

### Deviation from sleep associated with maximal volume

Model with only main effect of sleep was chosen, so we show it for all ages at once. Maximum volume is attained at 6.3 hours of sleep. The percentage values in the plot are calculated as follows: The maximum at 100 % refers to a person at an arbitrary age with a sleep duration associated with maximum volume. For a female, this volume is 8060 and for a male it is 8182. The other percentage values show how large the expected volume is for someone with other sleep durations. For example, 99 % implies a 1 % reduction.

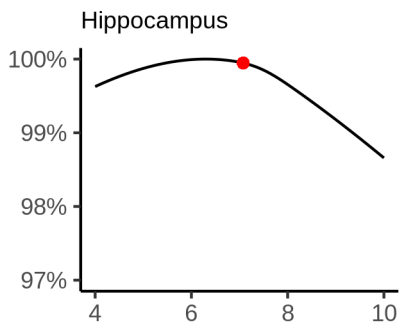

### Comparison of mean sleep and sleep associated with maximum volume

A 95 % confidence interval for the sleep associated with maximum volume is [5.33, 7.15].

The plot below compares average sleep to the sleep associated with maximum volume.

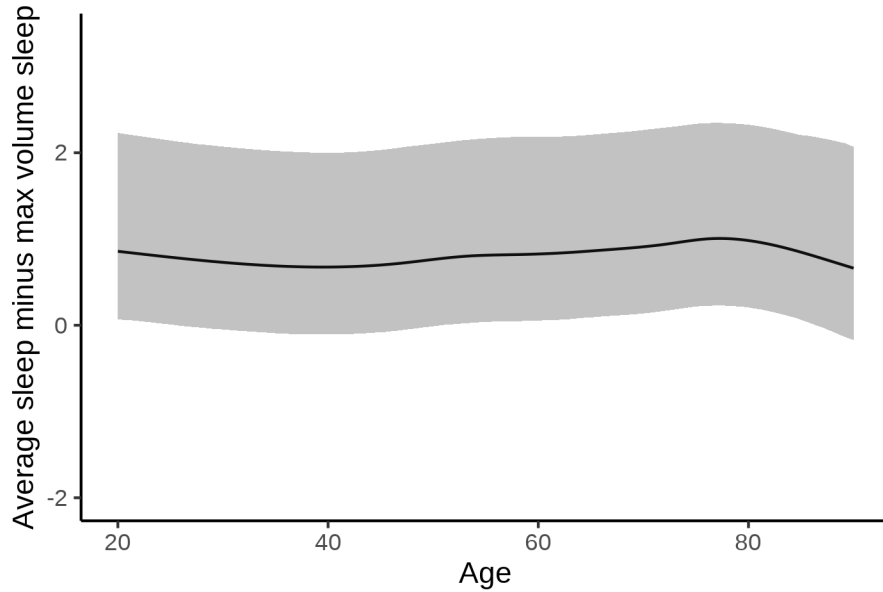

The next plot shows the difference between average sleep and sleep associated with maximum volume. The shaded region is a 95 % confidence interval.

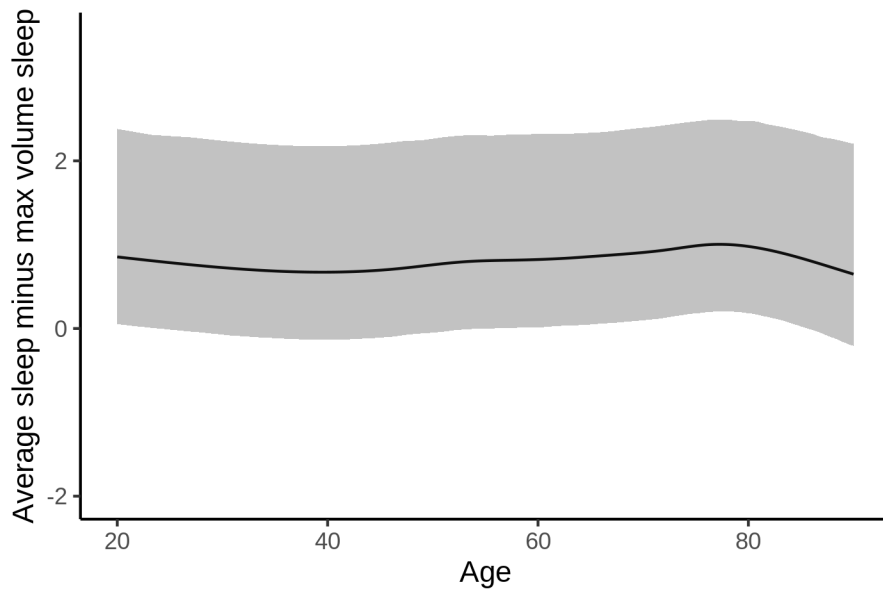

The next plot shows the probability that the sleep duration associated with maximum volume is longer than the average sleep duration, as a function of age. Probability below .05 can be interpreted as evidence that the sleep associated with maximum volume is shorter than the mean sleep, and probability above .95 can be interpreted the opposite way.

## Is max volume at above average sleep?

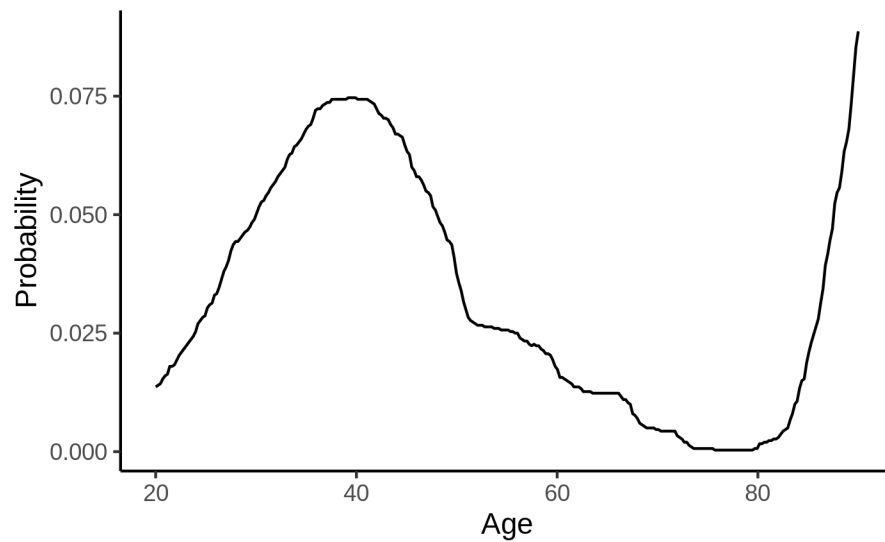

## Controlling for covariates

Below is the output for a model in which we only include data with income and education.

```
##
## Family: gaussian
## Link function: identity
##
## Formula:
## value ~ sex + site + s(age_z, k = 10, bs = "cr") + s(sleep_z,
##   k = 5, bs = "cr") + icv
## <environment: 0x558a48667170>
##
## Parametric coefficients:
##           Estimate Std. Error t value Pr(>|t|)
## (Intercept)  8469.311    82.446 102.725 < 2e-16 ***
## sexmale      102.521     9.018  11.368 < 2e-16 ***
## siteousAvanto -898.627    96.829  -9.281 < 2e-16 ***
## siteousPrisma -344.268   100.492  -3.426 0.000614 ***
## siteousSkyra  -556.398    88.938  -6.256 4.00e-10 ***
## siteUKB      -457.516    82.303  -5.559 2.74e-08 ***
## siteUOXF     -543.695    92.544  -5.875 4.27e-09 ***
## icv          412.033     4.628  89.035 < 2e-16 ***
## ---
## Signif. codes:  0 '***' 0.001 '**' 0.01 '*' 0.05 '.' 0.1 ' ' 1
##
## Approximate significance of smooth terms:
##           edf Ref.df      F p-value
## s(age_z)   6.898  6.898 906.250 < 2e-16 ***
## s(sleep_z) 2.701  2.701   7.544 0.000231 ***
## ---
## Signif. codes:  0 '***' 0.001 '**' 0.01 '*' 0.05 '.' 0.1 ' ' 1
##
```



```
## R-sq.(adj) = 0.401
## lmer.REML = 4.846e+05 Scale est. = 23769 n = 31190
```

Below is the output for a model in which we control for the main effects of income and education.

```
##
## Family: gaussian
## Link function: identity
##
## Formula:
## value ~ sex + site + s(age_z, k = 10, bs = "cr") + s(sleep_z,
##     k = 5, bs = "cr") + icv + income_scaled + education_scaled
## <environment: 0x558a48667170>
##
## Parametric coefficients:
##           Estimate Std. Error t value Pr(>|t|)
## (Intercept)  8438.563    82.959 101.720 < 2e-16 ***
## sexmale      102.719     9.043  11.359 < 2e-16 ***
## siteousAvanto -898.983    96.844  -9.283 < 2e-16 ***
## siteousPrisma -347.177   100.481  -3.455 0.000551 ***
## siteousSkyra  -557.210    88.947  -6.265 3.79e-10 ***
## siteUKB      -457.907    82.338  -5.561 2.70e-08 ***
## siteUOXF     -534.197    92.579  -5.770 7.99e-09 ***
## icv          410.078     4.666  87.893 < 2e-16 ***
## income_scaled  18.482     10.750   1.719 0.085569 .
## education_scaled 28.624     12.707   2.253 0.024284 *
## ---
## Signif. codes:  0 '***' 0.001 '**' 0.01 '*' 0.05 '.' 0.1 ' ' 1
##
## Approximate significance of smooth terms:
##           edf Ref.df      F p-value
## s(age_z)   6.897  6.897 825.692 < 2e-16 ***
## s(sleep_z) 2.595  2.595  7.106 0.000452 ***
## ---
## Signif. codes:  0 '***' 0.001 '**' 0.01 '*' 0.05 '.' 0.1 ' ' 1
##
## R-sq.(adj) = 0.402
## lmer.REML = 4.8458e+05 Scale est. = 23791 n = 31190
```

We also included interaction effects between sleep duration and education and income, in another model. The output is shown below, and the interaction terms are `income_scaled:sleep_z` and `education_scaled:sleep_z`.

```
##
## Family: gaussian
## Link function: identity
##
## Formula:
## value ~ sex + site + s(age_z, k = 10, bs = "cr") + s(sleep_z,
##     k = 5, bs = "cr") + icv + income_scaled + education_scaled +
##     income_scaled:sleep_z + education_scaled:sleep_z
## <environment: 0x558a48667170>
##
## Parametric coefficients:
##           Estimate Std. Error t value Pr(>|t|)
## (Intercept)  8438.866    82.963 101.718 < 2e-16 ***
```

```

## sexmale          102.082      9.049  11.281 < 2e-16 ***
## siteousAvanto    -900.126     96.845  -9.295 < 2e-16 ***
## siteousPrisma    -349.758    100.489  -3.481 0.000501 ***
## siteousSkyra     -558.326     88.947  -6.277 3.50e-10 ***
## siteUKB          -458.180     82.345  -5.564 2.66e-08 ***
## siteUOXF         -534.034     92.603  -5.767 8.15e-09 ***
## icv              410.146      4.666  87.901 < 2e-16 ***
## income_scaled    19.087      10.755   1.775 0.075968 .
## education_scaled 28.215      12.708   2.220 0.026413 *
## income_scaled:sleep_z -18.477    10.703  -1.726 0.084315 .
## education_scaled:sleep_z 14.270    12.331   1.157 0.247173
## ---
## Signif. codes:  0 '***' 0.001 '**' 0.01 '*' 0.05 '.' 0.1 ' ' 1
##
## Approximate significance of smooth terms:
##          edf Ref.df      F p-value
## s(age_z)  6.897  6.897 824.909 <2e-16 ***
## s(sleep_z) 2.635  2.635   4.576  0.0111 *
## ---
## Signif. codes:  0 '***' 0.001 '**' 0.01 '*' 0.05 '.' 0.1 ' ' 1
##
## R-sq.(adj) =  0.402
## lmer.REML = 4.8456e+05  Scale est. = 23791      n = 31190

```

We did the same controlling for BMI. Below is the model with no covariates but only keeping data with BMI.

```

##
## Family: gaussian
## Link function: identity
##
## Formula:
## value ~ sex + site + s(age_z, k = 10, bs = "cr") + s(sleep_z,
##           k = 5, bs = "cr") + icv
## <environment: 0x558a47e37130>
##
## Parametric coefficients:
##              Estimate Std. Error t value Pr(>|t|)
## (Intercept)  7606.759    52.116 145.959 < 2e-16 ***
## sexmale      96.281      8.758  10.994 < 2e-16 ***
## siteousPrisma 471.568    69.283   6.806 1.02e-11 ***
## siteousSkyra 387.221    38.042  10.179 < 2e-16 ***
## siteUCAM     430.543    55.307   7.785 7.20e-15 ***
## siteUKB      411.476    52.624   7.819 5.47e-15 ***
## siteUmU      435.593    63.458   6.864 6.80e-12 ***
## icv          417.266     4.507  92.578 < 2e-16 ***
## ---
## Signif. codes:  0 '***' 0.001 '**' 0.01 '*' 0.05 '.' 0.1 ' ' 1
##
## Approximate significance of smooth terms:
##          edf Ref.df      F p-value
## s(age_z)  7.289  7.289 987.33 < 2e-16 ***
## s(sleep_z) 2.596  2.596   7.91 0.000148 ***
## ---
## Signif. codes:  0 '***' 0.001 '**' 0.01 '*' 0.05 '.' 0.1 ' ' 1
##

```

```
## R-sq.(adj) = 0.412
## lmer.REML = 5.1907e+05 Scale est. = 22530 n = 33445
```

Below is the model output with main effect.

```
##
## Family: gaussian
## Link function: identity
##
## Formula:
## value ~ sex + site + s(age_z, k = 10, bs = "cr") + s(sleep_z,
## k = 5, bs = "cr") + icv + bmi
## <environment: 0x558a47e37130>
##
## Parametric coefficients:
## Estimate Std. Error t value Pr(>|t|)
## (Intercept) 7589.5638 56.4029 134.560 < 2e-16 ***
## sexmale 95.7381 8.7840 10.899 < 2e-16 ***
## siteousPrisma 471.0061 69.2870 6.798 1.08e-11 ***
## siteousSkyra 387.1637 38.0431 10.177 < 2e-16 ***
## siteUCAM 430.1804 55.3100 7.778 7.60e-15 ***
## siteUKB 410.9495 52.6289 7.808 5.96e-15 ***
## siteUmU 434.8825 63.4645 6.852 7.39e-12 ***
## icv 417.1578 4.5092 92.514 < 2e-16 ***
## bmi 0.6817 0.8548 0.797 0.425
## ---
## Signif. codes: 0 '***' 0.001 '**' 0.01 '*' 0.05 '.' 0.1 ' ' 1
##
## Approximate significance of smooth terms:
## edf Ref.df F p-value
## s(age_z) 7.288 7.288 987.09 < 2e-16 ***
## s(sleep_z) 2.614 2.614 7.61 0.000144 ***
## ---
## Signif. codes: 0 '***' 0.001 '**' 0.01 '*' 0.05 '.' 0.1 ' ' 1
##
## R-sq.(adj) = 0.412
## lmer.REML = 5.1907e+05 Scale est. = 22531 n = 33445
```

Next is the model with BMI-sleep interaction.

```
##
## Family: gaussian
## Link function: identity
##
## Formula:
## value ~ sex + site + s(age_z, k = 10, bs = "cr") + s(sleep_z,
## k = 5, bs = "cr") + icv + bmi + bmi:sleep_z
## <environment: 0x558a47e37130>
##
## Parametric coefficients:
## Estimate Std. Error t value Pr(>|t|)
## (Intercept) 7587.9785 56.4324 134.461 < 2e-16 ***
## sexmale 95.7691 8.7841 10.903 < 2e-16 ***
## siteousPrisma 471.0122 69.2870 6.798 1.08e-11 ***
## siteousSkyra 387.2929 38.0431 10.180 < 2e-16 ***
## siteUCAM 430.7383 55.3136 7.787 7.05e-15 ***
```

```

## siteUKB          411.5115    52.6327    7.819 5.50e-15 ***
## siteUmU          435.3608    63.4669    6.860 7.02e-12 ***
## icv              417.1870     4.5093   92.517 < 2e-16 ***
## bmi              0.7073     0.8553    0.827    0.408
## bmi:sleep_z     0.7032     0.8108    0.867    0.386
## ---
## Signif. codes:  0 '***' 0.001 '**' 0.01 '*' 0.05 '.' 0.1 ' ' 1
##
## Approximate significance of smooth terms:
##           edf Ref.df      F p-value
## s(age_z)  7.287  7.287 987.291 < 2e-16 ***
## s(sleep_z) 2.610  2.610  4.226 0.00772 **
## ---
## Signif. codes:  0 '***' 0.001 '**' 0.01 '*' 0.05 '.' 0.1 ' ' 1
##
## R-sq.(adj) =  0.412
## lmer.REML = 5.1907e+05  Scale est. = 22530    n = 33445

```

We did the same controlling for depression. Below is the model with no covariates but only keeping data with depression.

```

##
## Family: gaussian
## Link function: identity
##
## Formula:
## value ~ sex + site + s(age_z, k = 10, bs = "cr") + s(sleep_z,
##           k = 5, bs = "cr") + icv
## <environment: 0x558a46be14b8>
##
## Parametric coefficients:
##           Estimate Std. Error t value Pr(>|t|)
## (Intercept)  8352.007    41.973 198.984 < 2e-16 ***
## sexmale      95.391     8.806  10.833 < 2e-16 ***
## siteousAvanto -710.959    83.921  -8.472 < 2e-16 ***
## siteousPrisma -194.873    79.554  -2.450  0.0143 *
## siteousSkyra -296.464    62.943  -4.710 2.49e-06 ***
## siteUCAM     -351.896    57.537  -6.116 9.70e-10 ***
## siteUKB      -338.155    41.512  -8.146 3.89e-16 ***
## siteUmU      -305.071    56.245  -5.424 5.87e-08 ***
## icv          414.420     4.525  91.578 < 2e-16 ***
## ---
## Signif. codes:  0 '***' 0.001 '**' 0.01 '*' 0.05 '.' 0.1 ' ' 1
##
## Approximate significance of smooth terms:
##           edf Ref.df      F p-value
## s(age_z)  7.219  7.219 954.439 < 2e-16 ***
## s(sleep_z) 2.670  2.670  9.018 4.83e-05 ***
## ---
## Signif. codes:  0 '***' 0.001 '**' 0.01 '*' 0.05 '.' 0.1 ' ' 1
##
## R-sq.(adj) =  0.406
## lmer.REML = 5.1749e+05  Scale est. = 22060    n = 33357

```

Below is the model output with main effect.

```

##
## Family: gaussian
## Link function: identity
##
## Formula:
## value ~ sex + site + s(age_z, k = 10, bs = "cr") + s(sleep_z,
##     k = 5, bs = "cr") + icv + depression
## <environment: 0x558a46be14b8>
##
## Parametric coefficients:
##           Estimate Std. Error t value Pr(>|t|)
## (Intercept)  8368.205    42.142 198.572 < 2e-16 ***
## sexmale      93.712      8.813  10.634 < 2e-16 ***
## siteousAvanto -702.588    83.923  -8.372 < 2e-16 ***
## siteousPrisma -187.324    79.553  -2.355  0.0185 *
## siteousSkyra -287.038    62.965  -4.559 5.17e-06 ***
## siteUCAM     -348.098    57.529  -6.051 1.46e-09 ***
## siteUKB      -344.803    41.533  -8.302 < 2e-16 ***
## siteUmU      -255.878    57.431  -4.455 8.40e-06 ***
## icv          414.674     4.524  91.655 < 2e-16 ***
## depression   -132.626    31.489  -4.212 2.54e-05 ***
## ---
## Signif. codes:  0 '***' 0.001 '**' 0.01 '*' 0.05 '.' 0.1 ' ' 1
##
## Approximate significance of smooth terms:
##           edf Ref.df      F p-value
## s(age_z)   7.210  7.210 953.699 < 2e-16 ***
## s(sleep_z) 2.447  2.447  9.146 5.27e-05 ***
## ---
## Signif. codes:  0 '***' 0.001 '**' 0.01 '*' 0.05 '.' 0.1 ' ' 1
##
## R-sq.(adj) =  0.406
## lmer.REML = 5.1747e+05  Scale est. = 22051      n = 33357

```

Next is the model with depression-sleep interaction.

```

##
## Family: gaussian
## Link function: identity
##
## Formula:
## value ~ sex + site + s(age_z, k = 10, bs = "cr") + s(sleep_z,
##     k = 5, bs = "cr") + icv + depression + depression:sleep_z
## <environment: 0x558a46be14b8>
##
## Parametric coefficients:
##           Estimate Std. Error t value Pr(>|t|)
## (Intercept)  8368.208    42.142 198.572 < 2e-16 ***
## sexmale      93.554      8.814  10.614 < 2e-16 ***
## siteousAvanto -703.682    83.930  -8.384 < 2e-16 ***
## siteousPrisma -188.428    79.560  -2.368  0.0179 *
## siteousSkyra -288.090    62.973  -4.575 4.78e-06 ***
## siteUCAM     -349.229    57.540  -6.069 1.30e-09 ***
## siteUKB      -344.746    41.533  -8.301 < 2e-16 ***
## siteUmU      -248.433    57.923  -4.289 1.80e-05 ***

```

```

## icv          414.688      4.524  91.657 < 2e-16 ***
## depression   -134.501     31.548  -4.263 2.02e-05 ***
## depression:sleep_z -22.906     23.170  -0.989 0.3229
## ---
## Signif. codes:  0 '***' 0.001 '**' 0.01 '*' 0.05 '.' 0.1 ' ' 1
##
## Approximate significance of smooth terms:
##          edf Ref.df      F p-value
## s(age_z)  7.208  7.208 954.084 < 2e-16 ***
## s(sleep_z) 2.437  2.437  5.718 0.00154 **
## ---
## Signif. codes:  0 '***' 0.001 '**' 0.01 '*' 0.05 '.' 0.1 ' ' 1
##
## R-sq.(adj) =  0.406
## lmer.REML = 5.1746e+05  Scale est. = 22050    n = 33357

```

The plot below shows the sleep-volume curve for the original model and for the model with main effects of SES.

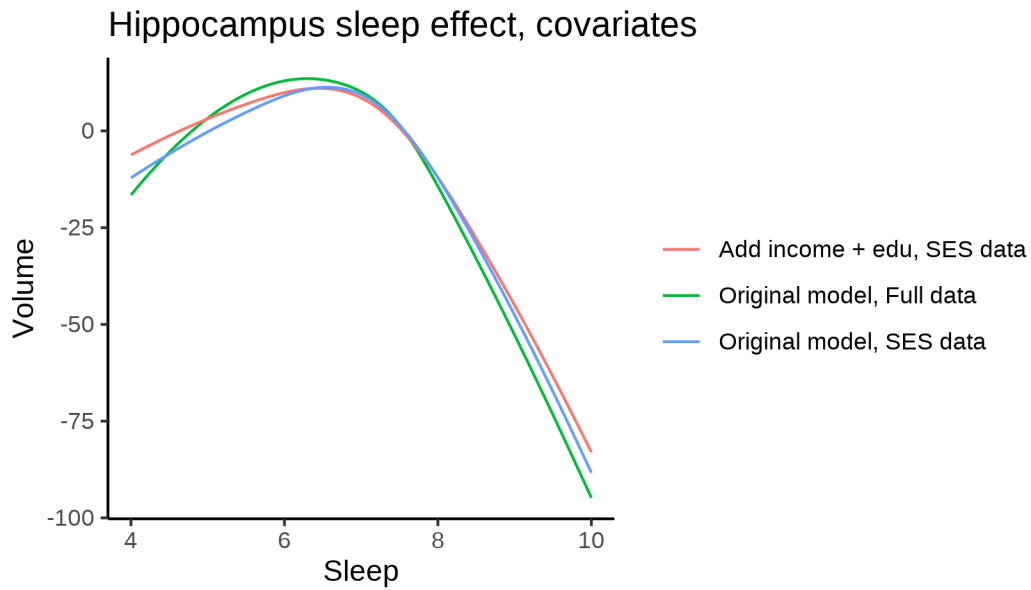

The plot below shows the sleep-volume curve for the original model and for the model with main effects of BMI.

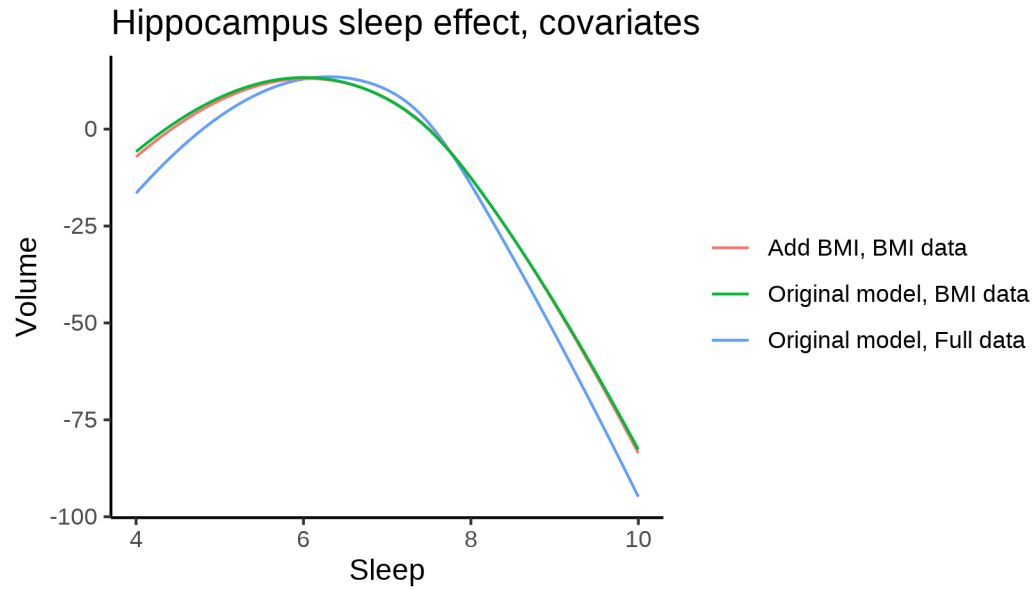

The plot below shows the sleep-volume curve for the original model and for the model with main effects of depression.

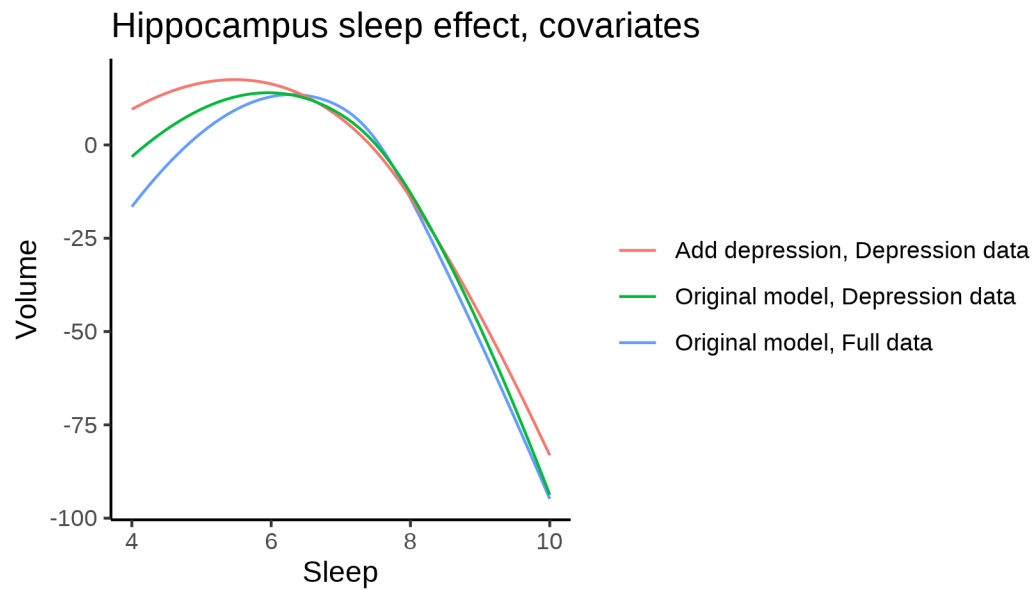

## Models Not controlling for ICV

### Model outputs

Model without sleep term

```
##
## Family: gaussian
## Link function: identity
##
## Formula:
```

```

## value ~ sex + site + s(age_z, k = 10, bs = "cr")
## <environment: 0x558965378b70>
##
## Parametric coefficients:
##           Estimate Std. Error t value Pr(>|t|)
## (Intercept)  7890.184    37.974 207.780 < 2e-16 ***
## sexmale      572.297     6.562  87.219 < 2e-16 ***
## siteMPIB     -356.342    49.083  -7.260 3.93e-13 ***
## siteousAvanto -319.047    38.744  -8.235 < 2e-16 ***
## siteousPrisma  4.699     65.126   0.072 0.9425
## siteousSkyra -164.791    37.586  -4.384 1.17e-05 ***
## siteUB       -250.702   117.823  -2.128 0.0334 *
## siteUCAM     -78.029    42.751  -1.825 0.0680 .
## siteUKB      -85.667    38.980  -2.198 0.0280 *
## siteUmU      -257.559    55.418  -4.648 3.37e-06 ***
## siteUOXF     -389.833    46.549  -8.375 < 2e-16 ***
## ---
## Signif. codes:  0 '***' 0.001 '**' 0.01 '*' 0.05 '.' 0.1 ' ' 1
##
## Approximate significance of smooth terms:
##           edf Ref.df   F p-value
## s(age_z)  7.553  7.553 1521 <2e-16 ***
## ---
## Signif. codes:  0 '***' 0.001 '**' 0.01 '*' 0.05 '.' 0.1 ' ' 1
##
## R-sq.(adj) = 0.276
## lmer.REML = 8.0789e+05 Scale est. = 23528    n = 51279

```

Model with only main effects of age and sleep

```

##
## Family: gaussian
## Link function: identity
##
## Formula:
## value ~ sex + site + s(age_z, k = 10, bs = "cr") + s(sleep_z,
##           k = 5, bs = "cr")
## <environment: 0x558965378b70>
##
## Parametric coefficients:
##           Estimate Std. Error t value Pr(>|t|)
## (Intercept)  7895.006    37.995 207.789 < 2e-16 ***
## sexmale      570.709     6.561  86.985 < 2e-16 ***
## siteMPIB     -353.222    49.075  -7.198 6.21e-13 ***
## siteousAvanto -323.584    38.737  -8.353 < 2e-16 ***
## siteousPrisma  1.231     65.096   0.019 0.9849
## siteousSkyra -169.820    37.578  -4.519 6.22e-06 ***
## siteUB       -244.918   117.738  -2.080 0.0375 *
## siteUCAM     -76.844    42.731  -1.798 0.0721 .
## siteUKB      -89.993    39.001  -2.307 0.0210 *
## siteUmU      -252.812    55.506  -4.555 5.26e-06 ***
## siteUOXF     -391.929    46.525  -8.424 < 2e-16 ***
## ---
## Signif. codes:  0 '***' 0.001 '**' 0.01 '*' 0.05 '.' 0.1 ' ' 1
##

```



```

## Approximate significance of smooth terms:
##           edf Ref.df      F p-value
## s(age_z)  7.543  7.543 1499.75 <2e-16 ***
## s(sleep_z) 3.492  3.492  18.63 <2e-16 ***
## ---
## Signif. codes:  0 '***' 0.001 '**' 0.01 '*' 0.05 '.' 0.1 ' ' 1
##
## R-sq.(adj) =  0.277
## lmer.REML = 8.0783e+05  Scale est. = 23540      n = 51279

Model with full interaction between age and sleep

##
## Family: gaussian
## Link function: identity
##
## Formula:
## value ~ sex + site + t2(age_z, sleep_z, k = c(10, 4), bs = "cr")
## <environment: 0x558965378b70>
##
## Parametric coefficients:
##           Estimate Std. Error t value Pr(>|t|)
## (Intercept)  7893.37056   37.75700  209.057 < 2e-16 ***
## sexmale      571.54360    6.57358   86.945 < 2e-16 ***
## siteMPIB     -358.15036   49.09817  -7.295 3.04e-13 ***
## siteousAvanto -321.46608   38.83774  -8.277 < 2e-16 ***
## siteousPrisma  0.03865    65.22855   0.001  0.9995
## siteousSkyra -167.53186   37.68760  -4.445 8.80e-06 ***
## siteUB       -251.84540  117.68892  -2.140  0.0324 *
## siteUCAM     -80.03449   42.75006  -1.872  0.0612 .
## siteUKB      -88.56632   38.72929  -2.287  0.0222 *
## siteUmU      -256.95138   55.42601  -4.636 3.56e-06 ***
## siteUOXF     -392.59384   46.37095  -8.466 < 2e-16 ***
## ---
## Signif. codes:  0 '***' 0.001 '**' 0.01 '*' 0.05 '.' 0.1 ' ' 1
##
## Approximate significance of smooth terms:
##           edf Ref.df      F p-value
## t2(age_z,sleep_z) 12.43  12.43 150.5 <2e-16 ***
## ---
## Signif. codes:  0 '***' 0.001 '**' 0.01 '*' 0.05 '.' 0.1 ' ' 1
##
## R-sq.(adj) =  0.277
## lmer.REML = 8.0784e+05  Scale est. = 23536      n = 51279

```

## Model comparison

`mod_no_sleep` refers to model without sleep term, `mod_no_interaction` refers to model with only main effect of sleep, and `mod_full` refers to model with a full interaction between age and sleep. This is a nested model comparison, and the p-value at a given line refers to comparing the model at the line to the model on the line above. Hence, significance implies that the more complicated model is supported on statistical grounds.

To be even more specific, the p-value on the second row tests whether there is an association between sleep and volume. The p-value on the third row tests whether this association depends on age.

```

## Data: NULL
## Models:
## ml$mod_no_sleep$mer: NULL
## ml$mod_no_interaction$mer: NULL
## ml$mod_full$mer: NULL
##
##          npar    AIC    BIC logLik deviance Chisq Df Pr(>Chisq)
## ml$mod_no_sleep$mer      15 807917 808049 -403943    807887
## ml$mod_no_interaction$mer 17 807864 808014 -403915    807830 56.941  2 4.319e-13 ***
## ml$mod_full$mer          19 807876 808044 -403919    807838  0.000  2          1
## ---
## Signif. codes:  0 '***' 0.001 '**' 0.01 '*' 0.05 '.' 0.1 ' ' 1

```

We chose the model based on the likelihood ratio test with 5 % significance level, which was mod\_no\_interaction.

### Lifespan brain trajectory

The trajectory shown is from the chosen model mod\_no\_interaction\_no\_icv.

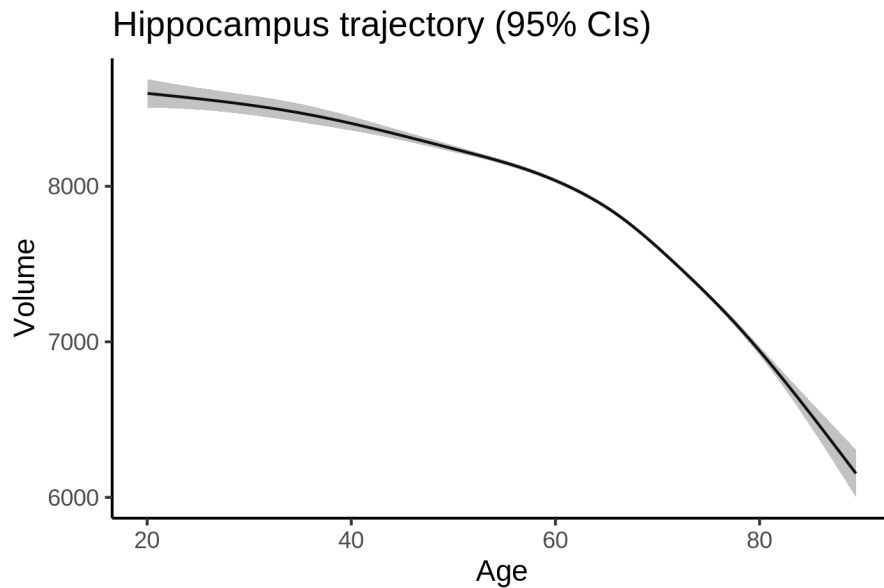

### Effect of sleep

The chosen model only included the main effect of sleep, and hence the effect does not vary with age. The black dot shows the average sleep duration across all ages in the sample.

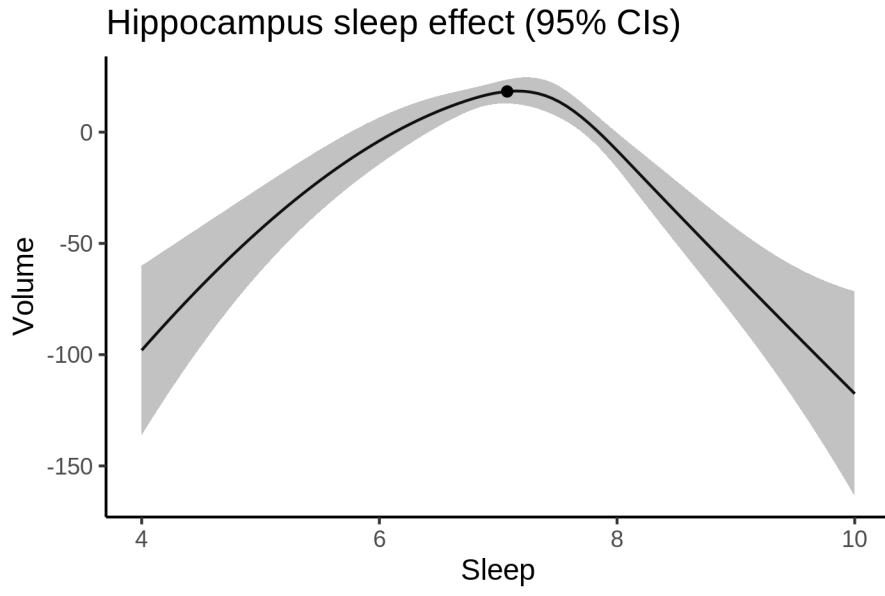

We also show the full interaction model for completeness, although it was not selected.

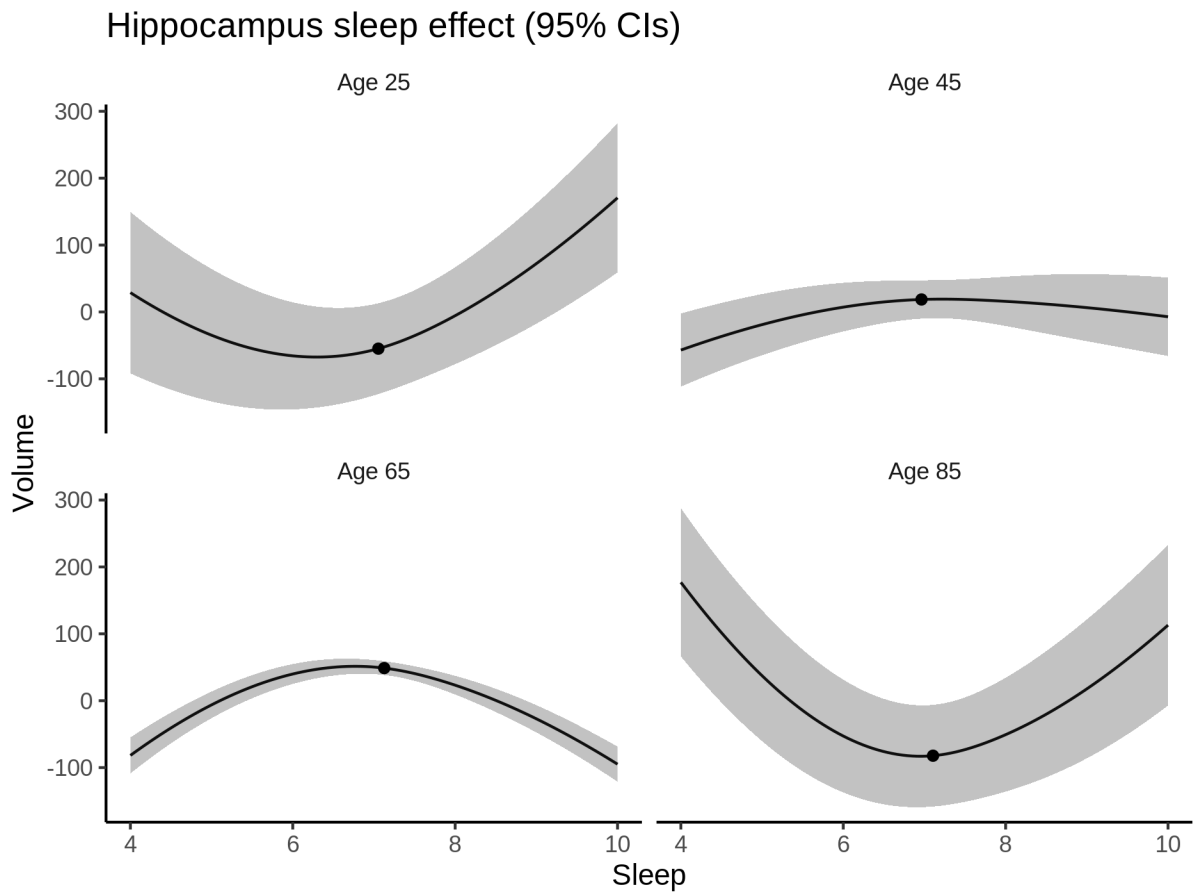

### Deviation from sleep associated with maximal volume

Model with only main effect of sleep was chosen, so we show it for all ages at once. Maximum volume is attained at 7.2 hours of sleep. The percentage values in the plot are calculated as follows: The maximum at 100 % refers to a person at an arbitrary age with a sleep duration associated with maximum volume. For a female, this volume is 7875 and for a male it is 8445. The other percentage values show how large the expected volume is for someone with other sleep durations. For example, 99 % implies a 1 % reduction.

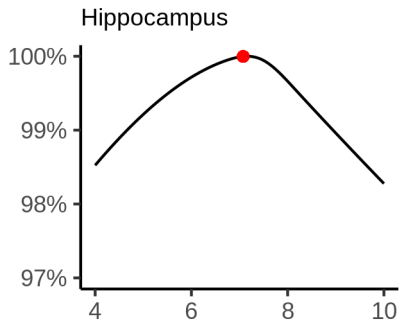

### Comparison of mean sleep and sleep associated with maximum volume

A 95 % confidence interval for the sleep associated with maximum volume is [6.91, 7.33].

The plot below compares average sleep to the sleep associated with maximum volume.

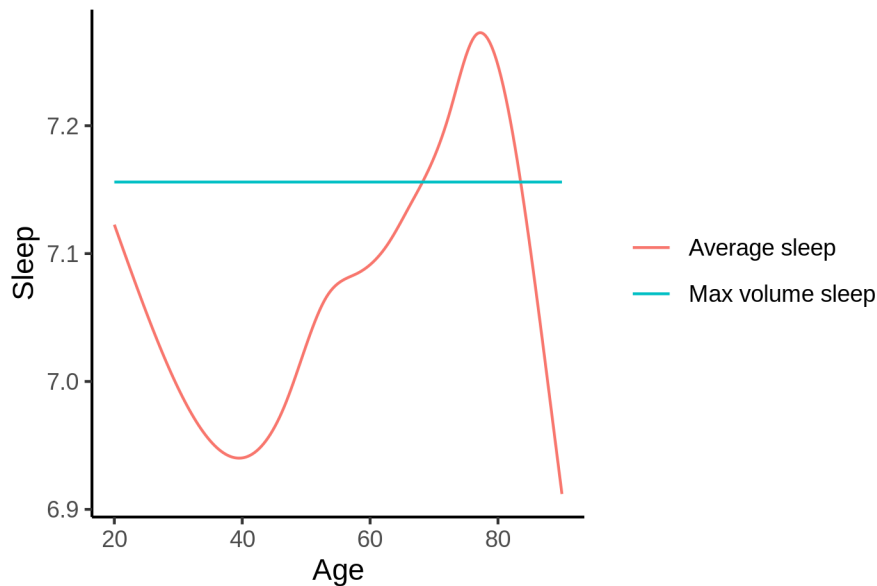

The next plot shows the difference between average sleep and sleep associated with maximum volume. The shaded region is a 95 % confidence interval.

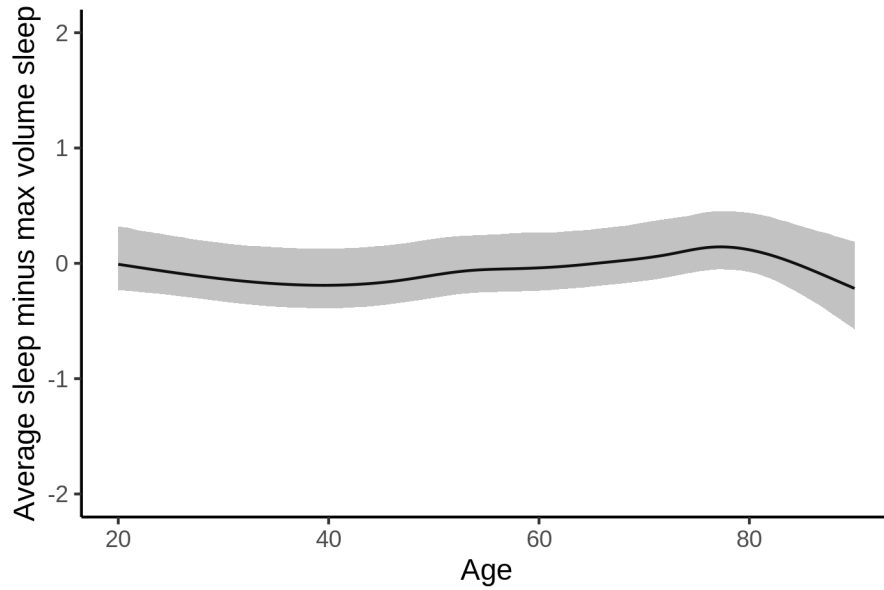

The next plot shows the probability that the sleep duration associated with maximum volume is longer than the average sleep duration, as a function of age. Probability below .05 can be interpreted as evidence that the sleep associated with maximum volume is shorter than the mean sleep, and probability above .95 can be interpreted the opposite way.

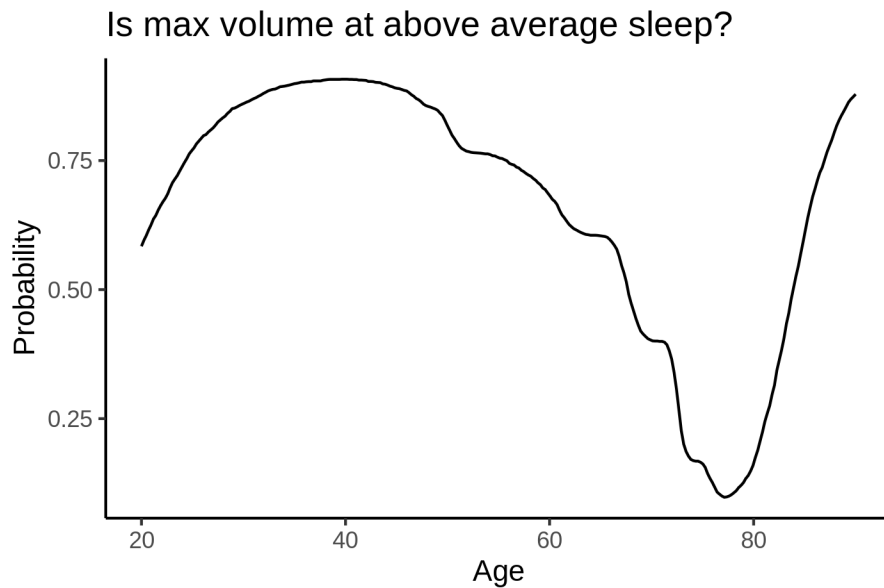

## Pallidum

### Descriptive statistics

| Study | Observations | Unique IDs | Mean age | Age range |
|-------|--------------|------------|----------|-----------|
| HCP   | 974          | 974        | 28.8     | 22 - 37   |
| MPIB  | 677          | 391        | 63.1     | 24 - 83   |

| Study | Observations | Unique IDs | Mean age | Age range |
|-------|--------------|------------|----------|-----------|
| UB    | 113          | 39         | 70.9     | 64 - 81   |
| UCAM  | 884          | 632        | 55.1     | 20 - 88   |
| UiO   | 1474         | 803        | 49.3     | 20 - 89   |
| UKB   | 45983        | 43137      | 64.5     | 45 - 83   |
| UmU   | 412          | 279        | 62.2     | 25 - 85   |
| UOXF  | 769          | 769        | 69.8     | 60 - 85   |

## Spaghetti plot

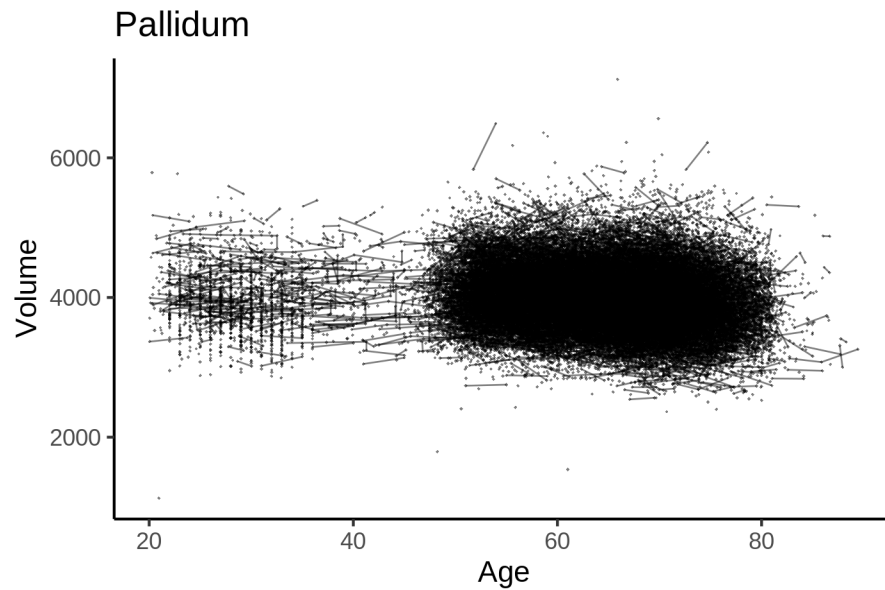

## Models Controlling for ICV

### Model outputs

Model without sleep term

```
##
## Family: gaussian
## Link function: identity
##
## Formula:
## value ~ sex + site + icv + s(age_z, k = 10, bs = "cr")
## <environment: 0x5589571ece60>
##
## Parametric coefficients:
##              Estimate Std. Error t value Pr(>|t|)
## (Intercept)  3623.343   19.038  190.323 < 2e-16 ***
## sexmale      84.740     3.870   21.896 < 2e-16 ***
## siteMPIB     516.546    24.195   21.350 < 2e-16 ***
## siteousAvanto 113.472    19.767    5.740 9.50e-09 ***
## siteousPrisma 229.824    33.415    6.878 6.15e-12 ***
## siteousSkyra 231.801    18.449   12.565 < 2e-16 ***
```

```

## siteUB          79.105    56.467    1.401    0.161
## siteUCAM       260.690    20.996    12.416 < 2e-16 ***
## siteUKB        346.852    19.527    17.762 < 2e-16 ***
## siteUmU        145.754    27.131     5.372 7.81e-08 ***
## siteUOXF       104.884    23.085     4.543 5.55e-06 ***
## icv            260.238     1.947  133.663 < 2e-16 ***
## ---
## Signif. codes:  0 '***' 0.001 '**' 0.01 '*' 0.05 '.' 0.1 ' ' 1
##
## Approximate significance of smooth terms:
##           edf Ref.df      F p-value
## s(age_z)  6.897  6.897 197.9 <2e-16 ***
## ---
## Signif. codes:  0 '***' 0.001 '**' 0.01 '*' 0.05 '.' 0.1 ' ' 1
##
## R-sq.(adj) =  0.423
## lmer.REML = 7.3671e+05  Scale est. = 11441      n = 51286

Model with only main effects of age and sleep

##
## Family: gaussian
## Link function: identity
##
## Formula:
## value ~ sex + site + icv + s(age_z, k = 10, bs = "cr") + s(sleep_z,
##           k = 5, bs = "cr")
## <environment: 0x5589571ece60>
##
## Parametric coefficients:
##           Estimate Std. Error t value Pr(>|t|)
## (Intercept) 3624.196    19.056 190.183 < 2e-16 ***
## sexmale      84.770     3.870  21.903 < 2e-16 ***
## siteMPIB     515.617    24.212  21.296 < 2e-16 ***
## siteousAvanto 113.020    19.772   5.716 1.10e-08 ***
## siteousPrisma 229.521    33.416   6.869 6.56e-12 ***
## siteousSkyra  231.333    18.454  12.536 < 2e-16 ***
## siteUB       78.844    56.467   1.396  0.163
## siteUCAM     260.254    21.000  12.393 < 2e-16 ***
## siteUKB      345.945    19.548  17.697 < 2e-16 ***
## siteUmU      143.861    27.195   5.290 1.23e-07 ***
## siteUOXF     104.445    23.089   4.524 6.09e-06 ***
## icv          260.178     1.948  133.572 < 2e-16 ***
## ---
## Signif. codes:  0 '***' 0.001 '**' 0.01 '*' 0.05 '.' 0.1 ' ' 1
##
## Approximate significance of smooth terms:
##           edf Ref.df      F p-value
## s(age_z)   6.897  6.897 197.91 <2e-16 ***
## s(sleep_z) 1.000  1.000   1.03   0.31
## ---
## Signif. codes:  0 '***' 0.001 '**' 0.01 '*' 0.05 '.' 0.1 ' ' 1
##
## R-sq.(adj) =  0.423
## lmer.REML = 7.3671e+05  Scale est. = 11441      n = 51286

```

Model with full interaction between age and sleep

```
##
## Family: gaussian
## Link function: identity
##
## Formula:
## value ~ sex + site + icv + t2(age_z, sleep_z, k = c(10, 4), bs = "cr")
## <environment: 0x5589571ece60>
##
## Parametric coefficients:
##           Estimate Std. Error t value Pr(>|t|)
## (Intercept) 3627.809    18.887 192.084 < 2e-16 ***
## sexmale      85.273      3.878  21.987 < 2e-16 ***
## siteMPIB     512.051    24.205  21.155 < 2e-16 ***
## siteousAvanto 110.769    19.794   5.596 2.20e-08 ***
## siteousPrisma 227.337    33.471   6.792 1.12e-11 ***
## siteousSkyra  228.739    18.490  12.371 < 2e-16 ***
## siteUB       74.623    56.416   1.323  0.186
## siteUCAM     255.924    20.983  12.197 < 2e-16 ***
## siteUKB      341.998    19.362  17.664 < 2e-16 ***
## siteUmU      141.453    27.127   5.215 1.85e-07 ***
## siteUOXF     99.462    22.969   4.330 1.49e-05 ***
## icv          260.053     1.948 133.490 < 2e-16 ***
## ---
## Signif. codes:  0 '***' 0.001 '**' 0.01 '*' 0.05 '.' 0.1 ' ' 1
##
## Approximate significance of smooth terms:
##           edf Ref.df    F p-value
## t2(age_z,sleep_z) 11.08  11.08 26.33 <2e-16 ***
## ---
## Signif. codes:  0 '***' 0.001 '**' 0.01 '*' 0.05 '.' 0.1 ' ' 1
##
## R-sq.(adj) =  0.424
## lmer.REML = 7.367e+05  Scale est. = 11432    n = 51286
```

## Model comparison

`mod_no_sleep` refers to model without sleep term, `mod_no_interaction` refers to model with only main effect of sleep, and `mod_full` refers to model with a full interaction between age and sleep. This is a nested model comparison, and the p-value at a given line refers to comparing the model at the line to the model on the line above. Hence, significance implies that the more complicated model is supported on statistical grounds.

To be even more specific, the p-value on the second row tests whether there is an association between sleep and volume. The p-value on the third row tests whether this association depends on age.

```
## Data: NULL
## Models:
## ml$mod_no_sleep$mer: NULL
## ml$mod_no_interaction$mer: NULL
## ml$mod_full$mer: NULL
##           npar    AIC    BIC logLik deviance Chisq Df Pr(>Chisq)
## ml$mod_no_sleep$mer      16 736738 736880 -368353  736706
## ml$mod_no_interaction$mer  18 736741 736900 -368353  736705 1.0303  2    0.5974
```



```
## ml$mod_full$mer          20 736742 736919 -368351 736702 3.4103 2 0.1817
```

We chose the model based on the likelihood ratio test with 5 % significance level, which was `mod_no_sleep`.

### Lifespan brain trajectory

The trajectory shown is from the chosen model `mod_no_sleep`.

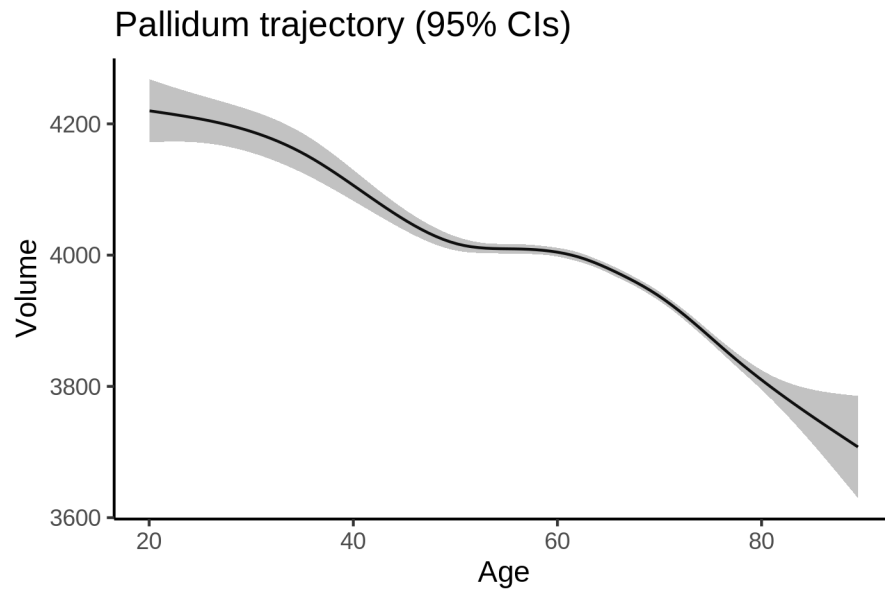

### Effect of sleep

The chosen model did not include a sleep term, and hence we don't have any estimated effect of sleep.

We show the full interaction model for completeness, although it was not selected.

## Pallidum sleep effect (95% CIs)

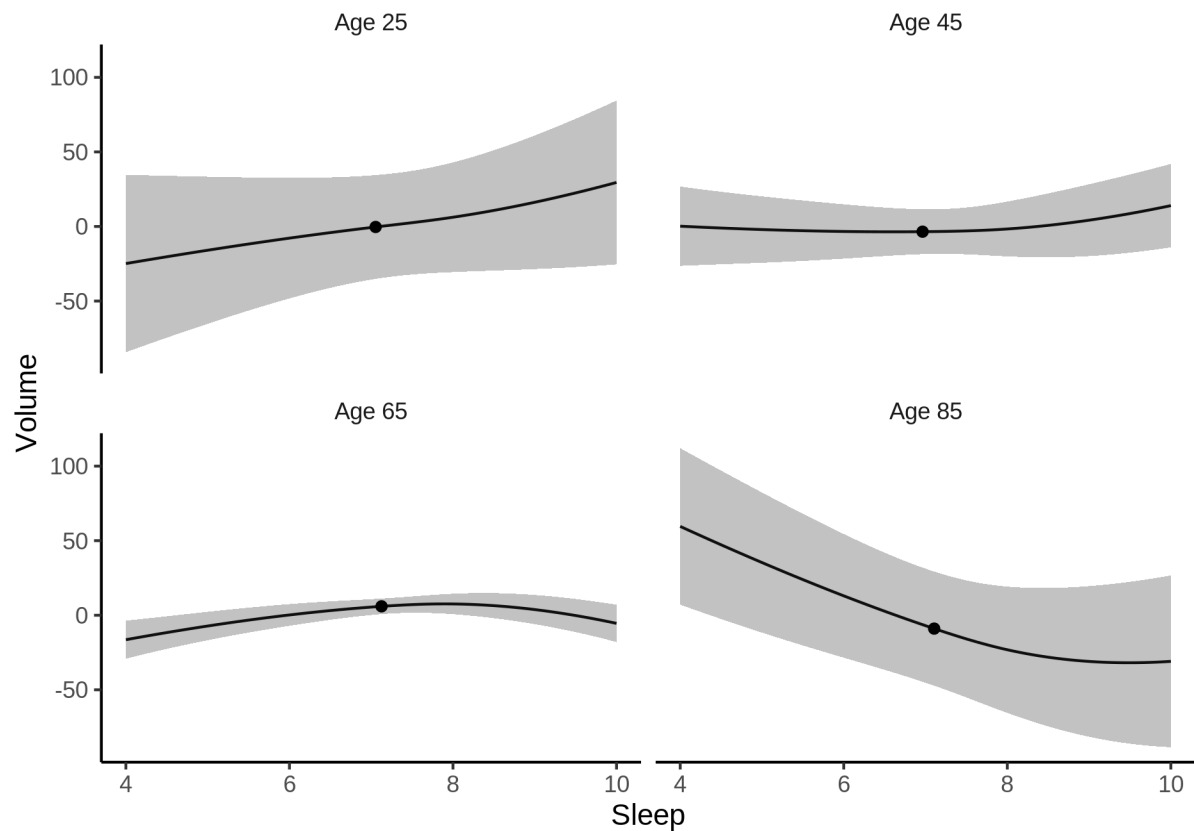

### Deviation from sleep associated with maximal volume

Model with no sleep term was selected. No plots to show. (Although we can of course dig up the plots, which will be pretty flat).

### Comparison of mean sleep and sleep associated with maximum volume

Nothing to show, as we did not find an association between sleep and volume.

### Controlling for covariates

Below is the output for a model in which we only include data with income and education.

```
##  
## Family: gaussian  
## Link function: identity  
##  
## Formula:  
## value ~ sex + site + s(age_z, k = 10, bs = "cr") + s(sleep_z,  
##     k = 5, bs = "cr") + icv  
## <environment: 0x558ad64982c0>  
##  
## Parametric coefficients:
```

```

##           Estimate Std. Error t value Pr(>|t|)
## (Intercept) 4189.598    44.416  94.325 < 2e-16 ***
## sexmale      78.037     4.891  15.955 < 2e-16 ***
## siteousAvanto -441.819    54.577  -8.095 5.92e-16 ***
## siteousPrisma -318.789    54.758  -5.822 5.88e-09 ***
## siteousSkyra -318.784    48.035  -6.637 3.26e-11 ***
## siteUKB      -219.792    44.340  -4.957 7.20e-07 ***
## siteUOXF     -408.274    49.929  -8.177 3.02e-16 ***
## icv          269.535     2.513 107.264 < 2e-16 ***
## ---
## Signif. codes:  0 '***' 0.001 '**' 0.01 '*' 0.05 '.' 0.1 ' ' 1
##
## Approximate significance of smooth terms:
##           edf Ref.df      F p-value
## s(age_z)   5.989  5.989 115.067 <2e-16 ***
## s(sleep_z) 1.000  1.000   0.645  0.422
## ---
## Signif. codes:  0 '***' 0.001 '**' 0.01 '*' 0.05 '.' 0.1 ' ' 1
##
## R-sq.(adj) =  0.423
## lmer.REML = 4.4782e+05  Scale est. = 12216      n = 31198

```

Below is the output for a model in which we control for the main effects of income and education.

```

##
## Family: gaussian
## Link function: identity
##
## Formula:
## value ~ sex + site + s(age_z, k = 10, bs = "cr") + s(sleep_z,
##           k = 5, bs = "cr") + icv + income_scaled + education_scaled
## <environment: 0x558ad64982c0>
##
## Parametric coefficients:
##           Estimate Std. Error t value Pr(>|t|)
## (Intercept) 4167.611    44.691  93.254 < 2e-16 ***
## sexmale      78.433     4.904  15.994 < 2e-16 ***
## siteousAvanto -443.357    54.578  -8.123 4.70e-16 ***
## siteousPrisma -321.594    54.745  -5.874 4.29e-09 ***
## siteousSkyra -320.521    48.033  -6.673 2.55e-11 ***
## siteUKB      -221.083    44.357  -4.984 6.26e-07 ***
## siteUOXF     -401.760    49.945  -8.044 9.00e-16 ***
## icv          268.109     2.534 105.793 < 2e-16 ***
## income_scaled   9.837     5.821   1.690 0.091034 .
## education_scaled 23.659     6.880   3.439 0.000585 ***
## ---
## Signif. codes:  0 '***' 0.001 '**' 0.01 '*' 0.05 '.' 0.1 ' ' 1
##
## Approximate significance of smooth terms:
##           edf Ref.df      F p-value
## s(age_z)   6.008  6.008 102.528 <2e-16 ***
## s(sleep_z) 1.000  1.000   0.538  0.463
## ---
## Signif. codes:  0 '***' 0.001 '**' 0.01 '*' 0.05 '.' 0.1 ' ' 1
##

```

```
## R-sq.(adj) = 0.424
## lmer.REML = 4.4779e+05 Scale est. = 12220 n = 31198
```

We also included interaction effects between sleep duration and education and income, in another model. The output is shown below, and the interaction terms are `income_scaled:sleep_z` and `education_scaled:sleep_z`.

```
##
## Family: gaussian
## Link function: identity
##
## Formula:
## value ~ sex + site + s(age_z, k = 10, bs = "cr") + s(sleep_z,
##     k = 5, bs = "cr") + icv + income_scaled + education_scaled +
##     income_scaled:sleep_z + education_scaled:sleep_z
## <environment: 0x558ad64982c0>
##
## Parametric coefficients:
##              Estimate Std. Error t value Pr(>|t|)
## (Intercept)   4167.552    44.695  93.244 < 2e-16 ***
## sexmale        78.145     4.907  15.924 < 2e-16 ***
## siteousAvanto -443.762    54.580  -8.131 4.43e-16 ***
## siteousPrisma -322.779    54.751  -5.895 3.78e-09 ***
## siteousSkyra  -320.929    48.034  -6.681 2.41e-11 ***
## siteUKB       -221.039    44.363  -4.983 6.31e-07 ***
## siteUOXF      -401.548    49.960  -8.037 9.50e-16 ***
## icv           268.145     2.535 105.796 < 2e-16 ***
## income_scaled  10.147     5.824   1.742 0.081481 .
## education_scaled 23.497     6.880   3.415 0.000639 ***
## income_scaled:sleep_z -8.279     5.761  -1.437 0.150701
## education_scaled:sleep_z 6.279     6.660   0.943 0.345794
## ---
## Signif. codes:  0 '***' 0.001 '**' 0.01 '*' 0.05 '.' 0.1 ' ' 1
##
## Approximate significance of smooth terms:
##              edf Ref.df      F p-value
## s(age_z)     6.018  6.018 102.212 <2e-16 ***
## s(sleep_z)   1.000  1.000   0.002  0.966
## ---
## Signif. codes:  0 '***' 0.001 '**' 0.01 '*' 0.05 '.' 0.1 ' ' 1
##
## R-sq.(adj) = 0.424
## lmer.REML = 4.4777e+05 Scale est. = 12220 n = 31198
```

We did the same controlling for BMI. Below is the model with no covariates but only keeping data with BMI.

```
##
## Family: gaussian
## Link function: identity
##
## Formula:
## value ~ sex + site + s(age_z, k = 10, bs = "cr") + s(sleep_z,
##     k = 5, bs = "cr") + icv
## <environment: 0x558ad78498a8>
##
## Parametric coefficients:
```

```

##           Estimate Std. Error t value Pr(>|t|)
## (Intercept) 3720.417    32.793 113.452 < 2e-16 ***
## sexmale      75.663     4.760  15.897 < 2e-16 ***
## siteousPrisma 164.905    42.735   3.859 0.000114 ***
## siteousSkyra 177.662    26.977   6.586 4.60e-11 ***
## siteUCAM     173.722    34.320   5.062 4.18e-07 ***
## siteUKB      251.512    33.031   7.614 2.72e-14 ***
## siteUmU      56.722    38.202   1.485 0.137606
## icv          272.942     2.453 111.274 < 2e-16 ***
## ---
## Signif. codes:  0 '***' 0.001 '**' 0.01 '*' 0.05 '.' 0.1 ' ' 1
##
## Approximate significance of smooth terms:
##           edf Ref.df      F p-value
## s(age_z)   6.085  6.085 132.435 <2e-16 ***
## s(sleep_z) 1.148  1.148   0.881   0.41
## ---
## Signif. codes:  0 '***' 0.001 '**' 0.01 '*' 0.05 '.' 0.1 ' ' 1
##
## R-sq.(adj) =  0.428
## lmer.REML = 4.7992e+05  Scale est. = 11839      n = 33453

```

Below is the model output with main effect.

```

##
## Family: gaussian
## Link function: identity
##
## Formula:
## value ~ sex + site + s(age_z, k = 10, bs = "cr") + s(sleep_z,
##           k = 5, bs = "cr") + icv + bmi
## <environment: 0x558ad78498a8>
##
## Parametric coefficients:
##           Estimate Std. Error t value Pr(>|t|)
## (Intercept) 3857.5496    34.7690 110.948 < 2e-16 ***
## sexmale      79.9958     4.7633  16.794 < 2e-16 ***
## siteousPrisma 170.7034    42.6810   4.000 6.36e-05 ***
## siteousSkyra 178.6425    26.9673   6.624 3.54e-11 ***
## siteUCAM     176.9618    34.2812   5.162 2.46e-07 ***
## siteUKB      256.0837    32.9959   7.761 8.66e-15 ***
## siteUmU      62.7090    38.1517   1.644   0.1
## icv          273.8375     2.4496 111.788 < 2e-16 ***
## bmi          -5.4508     0.4628 -11.777 < 2e-16 ***
## ---
## Signif. codes:  0 '***' 0.001 '**' 0.01 '*' 0.05 '.' 0.1 ' ' 1
##
## Approximate significance of smooth terms:
##           edf Ref.df      F p-value
## s(age_z)   6.070  6.070 133.949 <2e-16 ***
## s(sleep_z) 2.069  2.069   1.191   0.274
## ---
## Signif. codes:  0 '***' 0.001 '**' 0.01 '*' 0.05 '.' 0.1 ' ' 1
##
## R-sq.(adj) =  0.431

```

```
## lmer.REML = 4.7978e+05 Scale est. = 11834 n = 33453
```

Next is the model with BMI-sleep interaction.

```
##
## Family: gaussian
## Link function: identity
##
## Formula:
## value ~ sex + site + s(age_z, k = 10, bs = "cr") + s(sleep_z,
## k = 5, bs = "cr") + icv + bmi + bmi:sleep_z
## <environment: 0x558ad78498a8>
##
## Parametric coefficients:
##           Estimate Std. Error t value Pr(>|t|)
## (Intercept) 3856.0984   34.7843 110.857 < 2e-16 ***
## sexmale      80.0223    4.7632  16.800 < 2e-16 ***
## siteousPrisma 170.7523   42.6813   4.001 6.33e-05 ***
## siteousSkyra 178.8093   26.9685   6.630 3.40e-11 ***
## siteUCAM     177.5262   34.2838   5.178 2.25e-07 ***
## siteUKB      256.6403   32.9985   7.777 7.62e-15 ***
## siteUmU       63.2037   38.1533   1.657 0.0976 .
## icv          273.8622    2.4496 111.797 < 2e-16 ***
## bmi          -5.4286    0.4631 -11.723 < 2e-16 ***
## bmi:sleep_z   0.6180    0.4385   1.409 0.1587
## ---
## Signif. codes:  0 '***' 0.001 '**' 0.01 '*' 0.05 '.' 0.1 ' ' 1
##
## Approximate significance of smooth terms:
##           edf Ref.df      F p-value
## s(age_z)   6.067  6.067 134.171 <2e-16 ***
## s(sleep_z) 2.057  2.057   1.993  0.123
## ---
## Signif. codes:  0 '***' 0.001 '**' 0.01 '*' 0.05 '.' 0.1 ' ' 1
##
## R-sq.(adj) = 0.431
## lmer.REML = 4.7978e+05 Scale est. = 11835 n = 33453
```

We did the same controlling for depression. Below is the model with no covariates but only keeping data with depression.

```
##
## Family: gaussian
## Link function: identity
##
## Formula:
## value ~ sex + site + s(age_z, k = 10, bs = "cr") + s(sleep_z,
## k = 5, bs = "cr") + icv
## <environment: 0x55895e81b3b8>
##
## Parametric coefficients:
##           Estimate Std. Error t value Pr(>|t|)
## (Intercept) 4087.141   22.608 180.786 < 2e-16 ***
## sexmale      76.372    4.792  15.938 < 2e-16 ***
## siteousAvanto -222.679   51.555  -4.319 1.57e-05 ***
## siteousPrisma -157.505   43.970  -3.582 0.000341 ***
```

```

## siteousSkyra -161.431    34.270  -4.711  2.48e-06 ***
## siteUCAM     -216.399    30.993  -6.982  2.96e-12 ***
## siteUKB      -116.869    22.353  -5.228  1.72e-07 ***
## siteUmU      -312.669    30.354 -10.301 < 2e-16 ***
## icv          270.672     2.466 109.781 < 2e-16 ***
## ---
## Signif. codes:  0 '***' 0.001 '**' 0.01 '*' 0.05 '.' 0.1 ' ' 1
##
## Approximate significance of smooth terms:
##           edf Ref.df      F p-value
## s(age_z)  6.219  6.219 118.626 <2e-16 ***
## s(sleep_z) 1.000  1.000   0.787  0.375
## ---
## Signif. codes:  0 '***' 0.001 '**' 0.01 '*' 0.05 '.' 0.1 ' ' 1
##
## R-sq.(adj) =  0.423
## lmer.REML = 4.7855e+05  Scale est. = 11416    n = 33365

```

Below is the model output with main effect.

```

##
## Family: gaussian
## Link function: identity
##
## Formula:
## value ~ sex + site + s(age_z, k = 10, bs = "cr") + s(sleep_z,
##           k = 5, bs = "cr") + icv + depression
## <environment: 0x55895e81b3b8>
##
## Parametric coefficients:
##           Estimate Std. Error t value Pr(>|t|)
## (Intercept)  4090.507    22.709 180.125 < 2e-16 ***
## sexmale       76.036     4.796  15.852 < 2e-16 ***
## siteousAvanto -220.957    51.563  -4.285 1.83e-05 ***
## siteousPrisma -155.975    43.977  -3.547 0.000391 ***
## siteousSkyra  -159.489    34.288  -4.651 3.31e-06 ***
## siteUCAM      -215.598    30.995  -6.956 3.57e-12 ***
## siteUKB       -118.306    22.372  -5.288 1.24e-07 ***
## siteUmU       -302.711    30.999  -9.765 < 2e-16 ***
## icv           270.709     2.466 109.789 < 2e-16 ***
## depression    -26.873    17.007  -1.580 0.114091
## ---
## Signif. codes:  0 '***' 0.001 '**' 0.01 '*' 0.05 '.' 0.1 ' ' 1
##
## Approximate significance of smooth terms:
##           edf Ref.df      F p-value
## s(age_z)  6.208  6.208 118.929 <2e-16 ***
## s(sleep_z) 1.093  1.093   0.646  0.469
## ---
## Signif. codes:  0 '***' 0.001 '**' 0.01 '*' 0.05 '.' 0.1 ' ' 1
##
## R-sq.(adj) =  0.423
## lmer.REML = 4.7854e+05  Scale est. = 11415    n = 33365

```

Next is the model with depression-sleep interaction.

```

##
## Family: gaussian
## Link function: identity
##
## Formula:
## value ~ sex + site + s(age_z, k = 10, bs = "cr") + s(sleep_z,
##     k = 5, bs = "cr") + icv + depression + depression:sleep_z
## <environment: 0x555895e81b3b8>
##
## Parametric coefficients:
##           Estimate Std. Error t value Pr(>|t|)
## (Intercept)   4090.507     22.710  180.123 < 2e-16 ***
## sexmale         76.084      4.797   15.860 < 2e-16 ***
## siteousAvanto  -220.601     51.567  -4.278 1.89e-05 ***
## siteousPrisma -155.633     43.982  -3.539 0.000403 ***
## siteousSkyra   -159.148     34.294  -4.641 3.49e-06 ***
## siteUCAM       -215.251     31.002  -6.943 3.91e-12 ***
## siteUKB        -118.318     22.373  -5.289 1.24e-07 ***
## siteUmU        -304.959     31.253  -9.758 < 2e-16 ***
## icv            270.706      2.466  109.784 < 2e-16 ***
## depression     -26.385     17.037  -1.549 0.121450
## depression:sleep_z  7.066     12.424   0.569 0.569562
## ---
## Signif. codes:  0 '***' 0.001 '**' 0.01 '*' 0.05 '.' 0.1 ' ' 1
##
## Approximate significance of smooth terms:
##           edf Ref.df      F p-value
## s(age_z)   6.211  6.211 118.812 <2e-16 ***
## s(sleep_z) 1.118  1.118   0.172   0.801
## ---
## Signif. codes:  0 '***' 0.001 '**' 0.01 '*' 0.05 '.' 0.1 ' ' 1
##
## R-sq.(adj) =  0.423
## lmer.REML = 4.7853e+05  Scale est. = 11415      n = 33365

```

The plot below shows the sleep-volume curve for the original model and for the model with main effects of SES.



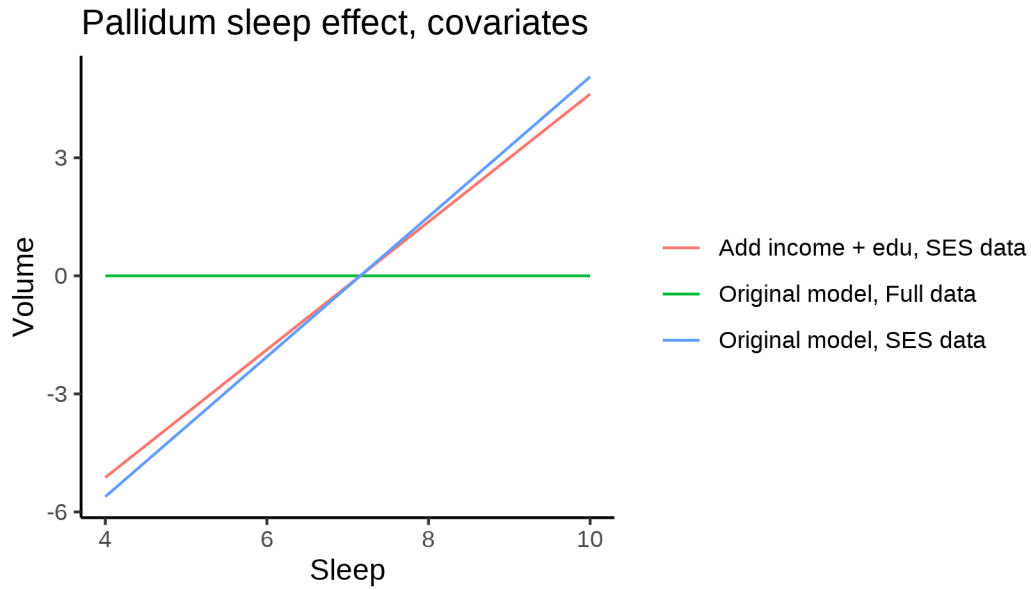

The plot below shows the sleep-volume curve for the original model and for the model with main effects of BMI.

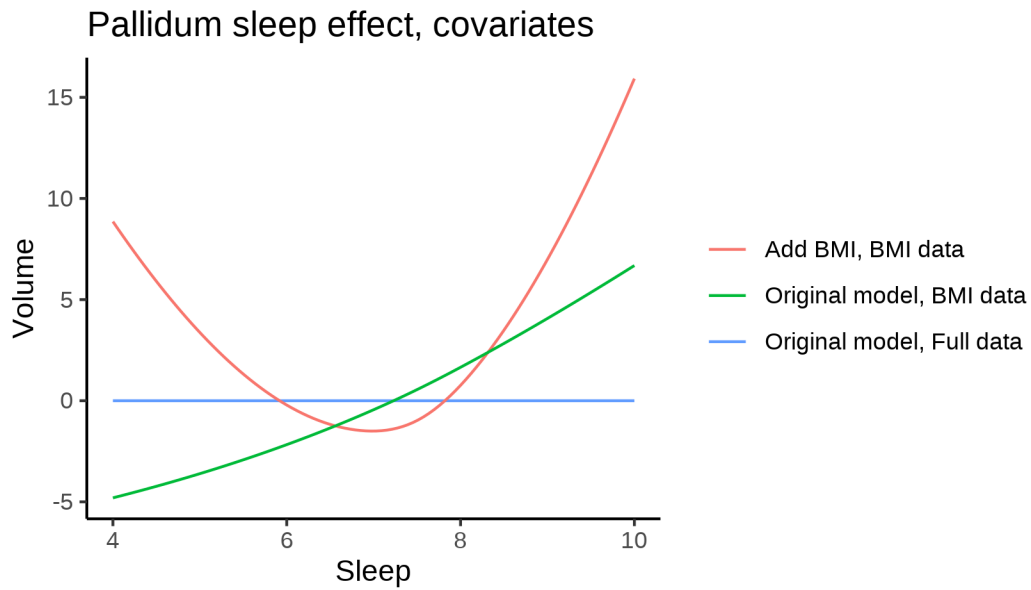

The plot below shows the sleep-volume curve for the original model and for the model with main effects of depression.

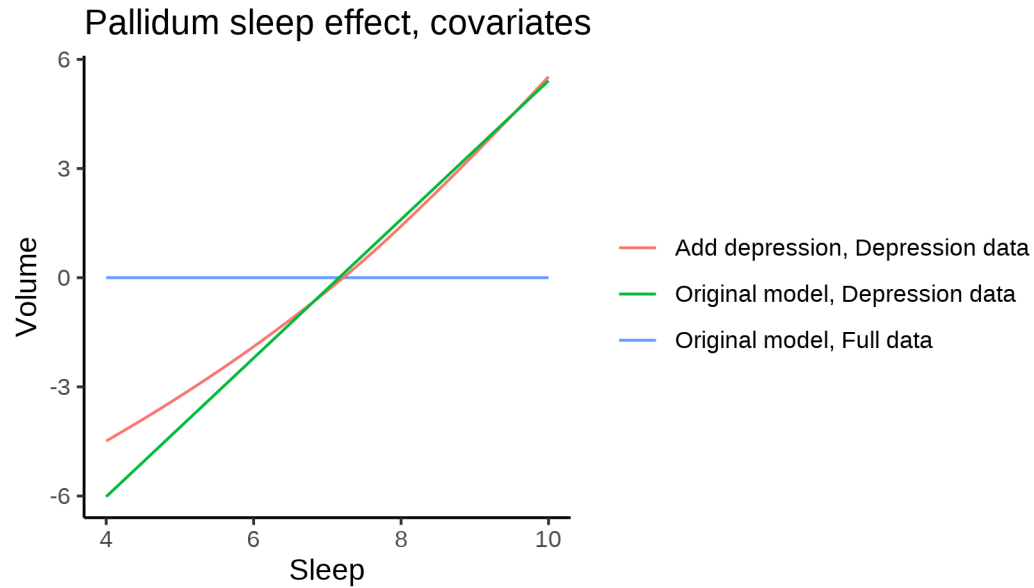

## Models Not controlling for ICV

### Model outputs

Model without sleep term

```
##
## Family: gaussian
## Link function: identity
##
## Formula:
## value ~ sex + site + s(age_z, k = 10, bs = "cr")
## <environment: 0x558a4956ba70>
##
## Parametric coefficients:
##              Estimate Std. Error t value Pr(>|t|)
## (Intercept)  3485.197    21.582  161.484 < 2e-16 ***
## sexmale      379.961     3.729  101.893 < 2e-16 ***
## siteMPIB     94.820     27.878   3.401 0.000671 ***
## siteousAvanto 225.706    22.506  10.029 < 2e-16 ***
## siteousPrisma 277.428    38.410   7.223 5.16e-13 ***
## siteousSkyra  248.506    21.384  11.621 < 2e-16 ***
## siteUB       -2.812     66.477  -0.042 0.966260
## siteUCAM     271.905    24.299  11.190 < 2e-16 ***
## siteUKB      349.668    22.156  15.782 < 2e-16 ***
## siteUmU      35.660    31.472   1.133 0.257182
## siteUOXF     39.548    26.463   1.494 0.135066
## ---
## Signif. codes:  0 '***' 0.001 '**' 0.01 '*' 0.05 '.' 0.1 ' ' 1
##
## Approximate significance of smooth terms:
##              edf Ref.df    F p-value
## s(age_z)    5.497  5.497 293.3 <2e-16 ***
```

```
## ---
## Signif. codes:  0 '***' 0.001 '**' 0.01 '*' 0.05 '.' 0.1 ' ' 1
##
## R-sq.(adj) =  0.207
## lmer.REML = 7.5188e+05  Scale est. = 11768      n = 51286
```

Model with only main effects of age and sleep

```
##
## Family: gaussian
## Link function: identity
##
## Formula:
## value ~ sex + site + s(age_z, k = 10, bs = "cr") + s(sleep_z,
##      k = 5, bs = "cr")
## <environment: 0x558a4956ba70>
##
## Parametric coefficients:
##              Estimate Std. Error t value Pr(>|t|)
## (Intercept)   3491.43    21.60 161.633 < 2e-16 ***
## sexmale        379.35     3.73 101.707 < 2e-16 ***
## siteMPIB       91.26    27.88   3.273 0.00106 **
## siteousAvanto 221.80    22.51   9.855 < 2e-16 ***
## siteousPrisma 274.78    38.40   7.156 8.42e-13 ***
## siteousSkyra  244.50    21.39  11.433 < 2e-16 ***
## siteUB         -2.08    66.45  -0.031 0.97503
## siteUCAM       270.03    24.30  11.115 < 2e-16 ***
## siteUKB        343.42    22.18  15.487 < 2e-16 ***
## siteUmU        26.88    31.53   0.852 0.39400
## siteUOXF       36.83    26.46   1.392 0.16388
```

```
## ---
## Signif. codes:  0 '***' 0.001 '**' 0.01 '*' 0.05 '.' 0.1 ' ' 1
##
## Approximate significance of smooth terms:
##              edf Ref.df      F p-value
## s(age_z)     5.494  5.494 291.77 < 2e-16 ***
## s(sleep_z)   3.307  3.307  10.44 1.62e-07 ***
## ---
```

```
## Signif. codes:  0 '***' 0.001 '**' 0.01 '*' 0.05 '.' 0.1 ' ' 1
##
## R-sq.(adj) =  0.207
## lmer.REML = 7.5185e+05  Scale est. = 11766      n = 51286
```

Model with full interaction between age and sleep

```
##
## Family: gaussian
## Link function: identity
##
## Formula:
## value ~ sex + site + t2(age_z, sleep_z, k = c(10, 4), bs = "cr")
## <environment: 0x558a4956ba70>
##
## Parametric coefficients:
##              Estimate Std. Error t value Pr(>|t|)
## (Intercept)   3500.705    21.471 163.047 < 2e-16 ***
```

```

## sexmale          380.534      3.736 101.854 < 2e-16 ***
## siteMPIB         79.114      27.898  2.836 0.00457 **
## siteousAvanto   216.581      22.551  9.604 < 2e-16 ***
## siteousPrisma   270.236      38.457  7.027 2.14e-12 ***
## siteousSkyra    238.796      21.443 11.137 < 2e-16 ***
## siteUB          -17.351      66.423 -0.261 0.79393
## siteUCAM        258.935      24.302 10.655 < 2e-16 ***
## siteUKB         333.359      22.028 15.133 < 2e-16 ***
## siteUmU         17.364      31.490  0.551 0.58136
## siteUOXF        23.926      26.377  0.907 0.36437
## ---
## Signif. codes:  0 '***' 0.001 '**' 0.01 '*' 0.05 '.' 0.1 ' ' 1
##
## Approximate significance of smooth terms:
##              edf Ref.df    F p-value
## t2(age_z,sleep_z) 8.89  8.89 26.83 <2e-16 ***
## ---
## Signif. codes:  0 '***' 0.001 '**' 0.01 '*' 0.05 '.' 0.1 ' ' 1
##
## R-sq.(adj) =  0.207
## lmer.REML = 7.5184e+05  Scale est. = 11747    n = 51286

```

## Model comparison

`mod_no_sleep` refers to model without sleep term, `mod_no_interaction` refers to model with only main effect of sleep, and `mod_full` refers to model with a full interaction between age and sleep. This is a nested model comparison, and the p-value at a given line refers to comparing the model at the line to the model on the line above. Hence, significance implies that the more complicated model is supported on statistical grounds.

To be even more specific, the p-value on the second row tests whether there is an association between sleep and volume. The p-value on the third row tests whether this association depends on age.

```

## Data: NULL
## Models:
## ml$mod_no_sleep$mer: NULL
## ml$mod_no_interaction$mer: NULL
## ml$mod_full$mer: NULL
##
##              npar    AIC    BIC logLik deviance Chisq Df Pr(>Chisq)
## ml$mod_no_sleep$mer      15 751908 752040 -375939  751878
## ml$mod_no_interaction$mer  17 751882 752032 -375924  751848 30.014  2  3.038e-07 ***
## ml$mod_full$mer          19 751875 752043 -375918  751837 10.849  2  0.004408 **
## ---
## Signif. codes:  0 '***' 0.001 '**' 0.01 '*' 0.05 '.' 0.1 ' ' 1

```

We chose the model based on the likelihood ratio test with 5 % significance level, which was `mod_full`.

## Lifespan brain trajectory

The trajectory shown is from the chosen model `mod_full_no_icv`.

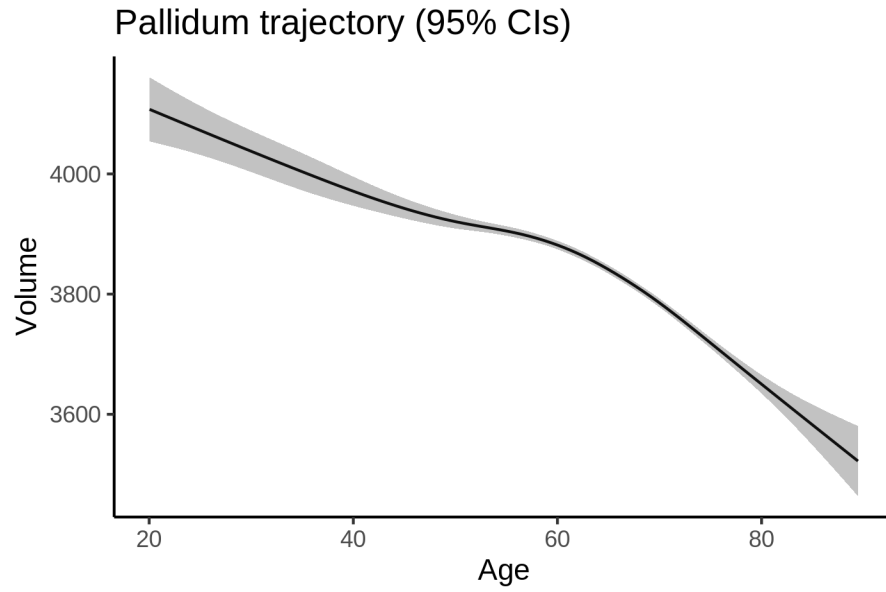

#### Effect of sleep

The chosen model included a full interaction between age and sleep, and the effect of sleep is hence plotted for a set of different ages. For comparability across ages, the sleep-volume curves at each age have been standardized so that they sum to zero.

### Pallidum sleep effect (95% CIs)

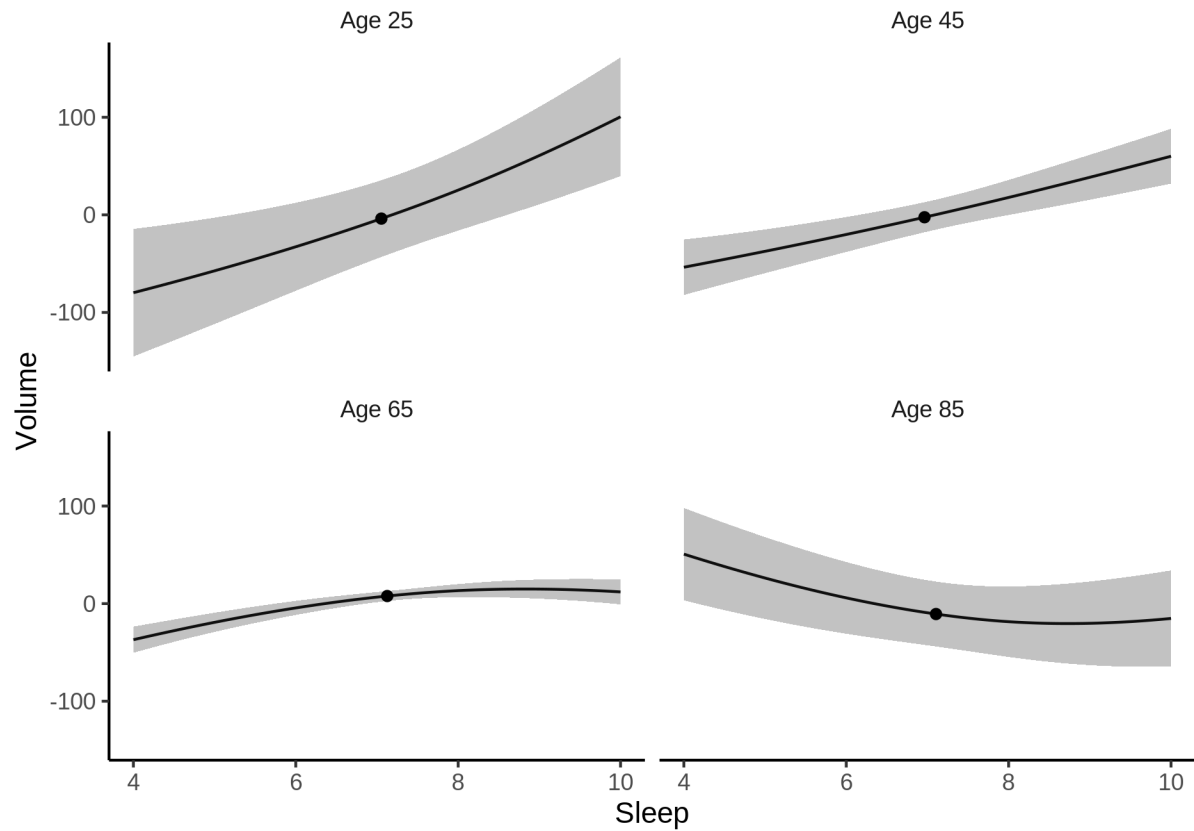

### Deviation from sleep associated with maximal volume

The table show the sleep associated with maximum volume at chosen ages.

| Age | Sleep at max vol |
|-----|------------------|
| 25  | 10.0             |
| 45  | 10.0             |
| 65  | 8.8              |
| 85  | 4.0              |

Model with sleep-age interaction was chosen, so we show it for four selected ages. The percentage values in the plot are calculated as follows: The maximum at 100 % refers to a person at the given age with a sleep duration associated with maximum volume. The other percentage values show how large the expected volume is for someone with other sleep durations. For example, 99 % implies a 1 % reduction.

### Pallidum sleep effect

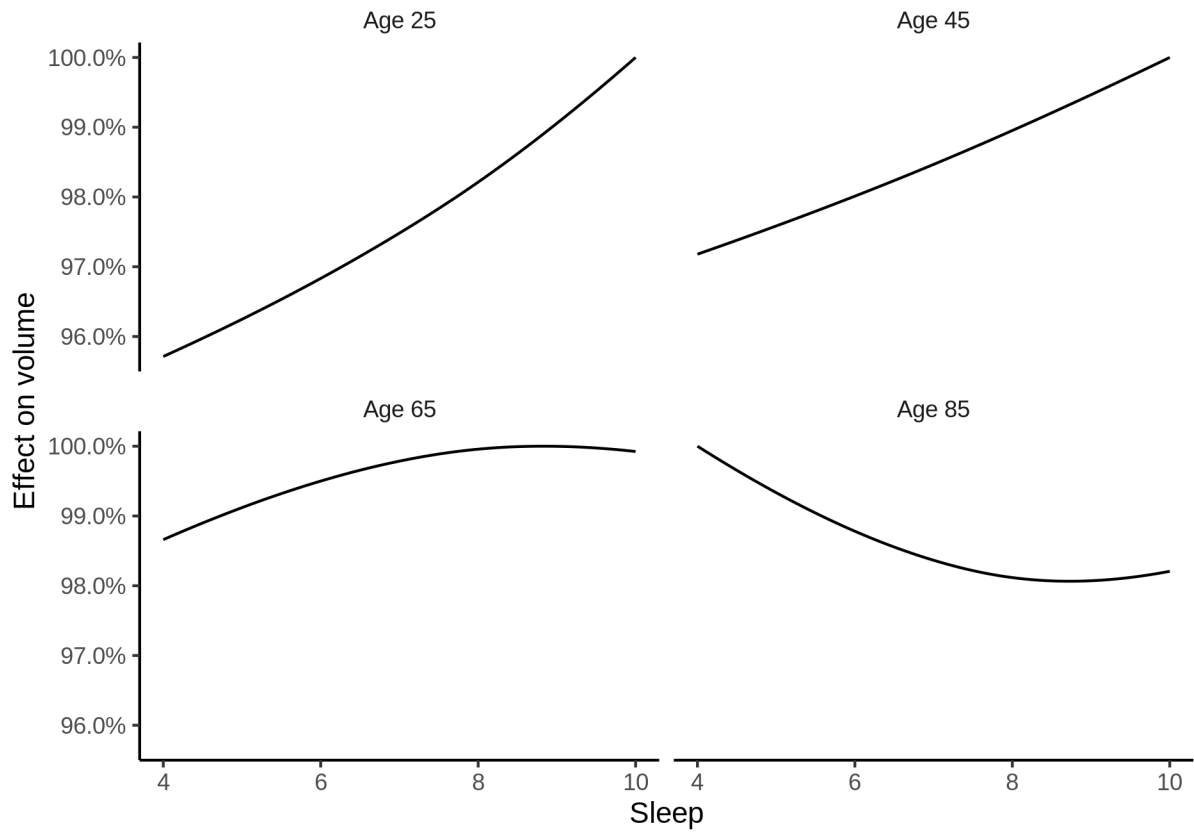

### Comparison of mean sleep and sleep associated with maximum volume

The plot below compares average sleep to the sleep associated with maximum volume.

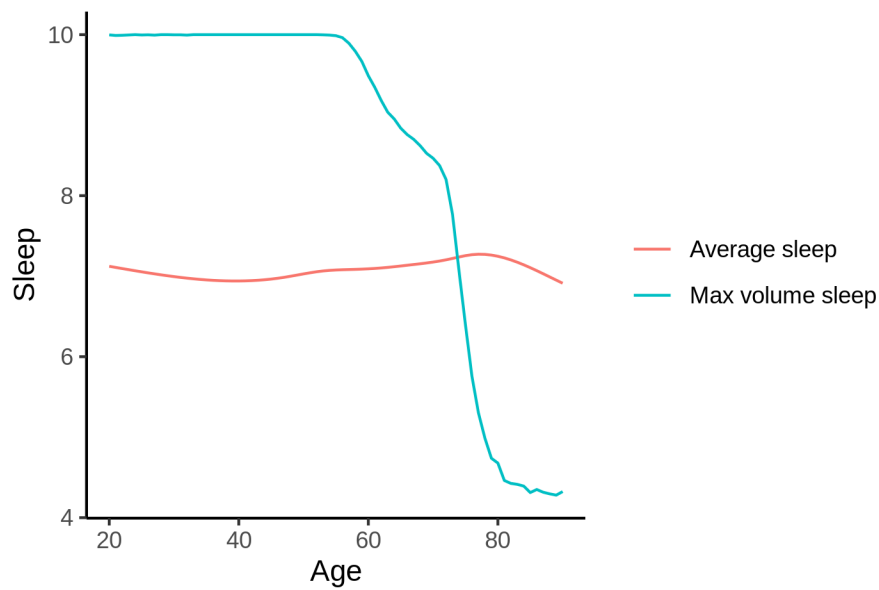

The next plot shows the difference between average sleep and sleep associated with maximum volume. The shaded region is a 95 % confidence interval.

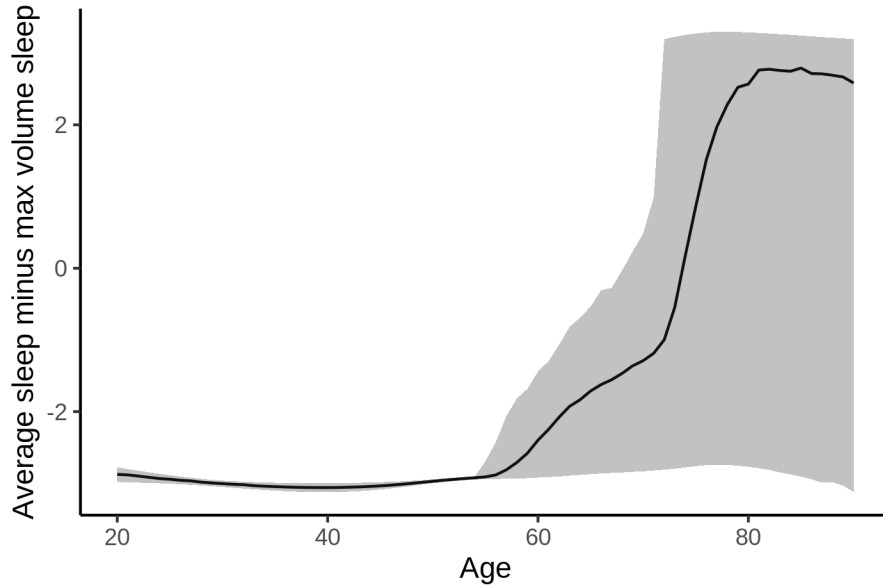

The next plot shows the probability that the sleep duration associated with maximum volume is longer than the average sleep duration, as a function of age. Probability below .05 can be interpreted as evidence that the sleep associated with maximum volume is shorter than the mean sleep, and probability above .95 can be interpreted the opposite way.

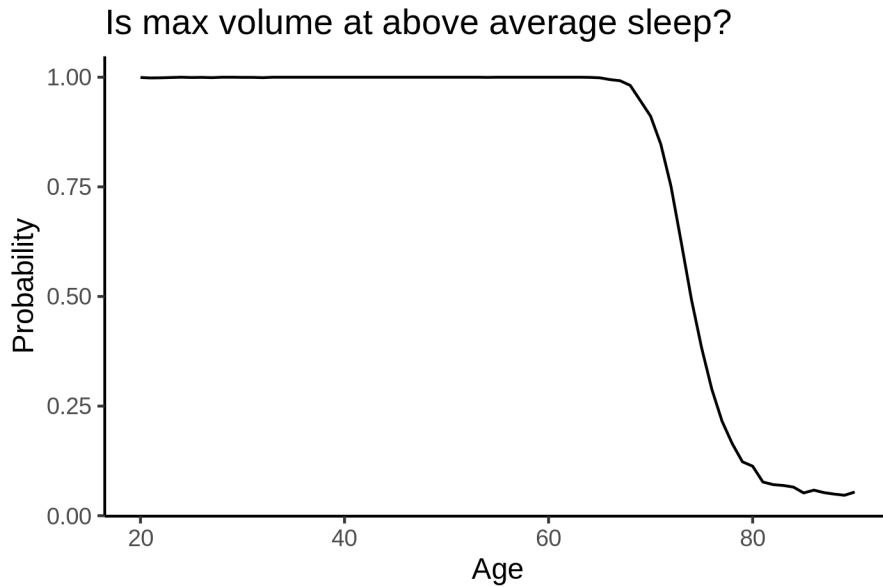

## Putamen

### Descriptive statistics



| Study | Observations | Unique IDs | Mean age | Age range |
|-------|--------------|------------|----------|-----------|
| HCP   | 974          | 974        | 28.8     | 22 - 37   |
| MPIB  | 677          | 391        | 63.1     | 24 - 83   |
| UB    | 113          | 39         | 70.9     | 64 - 81   |
| UCAM  | 884          | 632        | 55.1     | 20 - 88   |
| UiO   | 1469         | 802        | 49.3     | 20 - 88   |
| UKB   | 45969        | 43130      | 64.5     | 45 - 83   |
| UmU   | 412          | 279        | 62.2     | 25 - 85   |
| UOXF  | 769          | 769        | 69.8     | 60 - 85   |

## Spaghetti plot

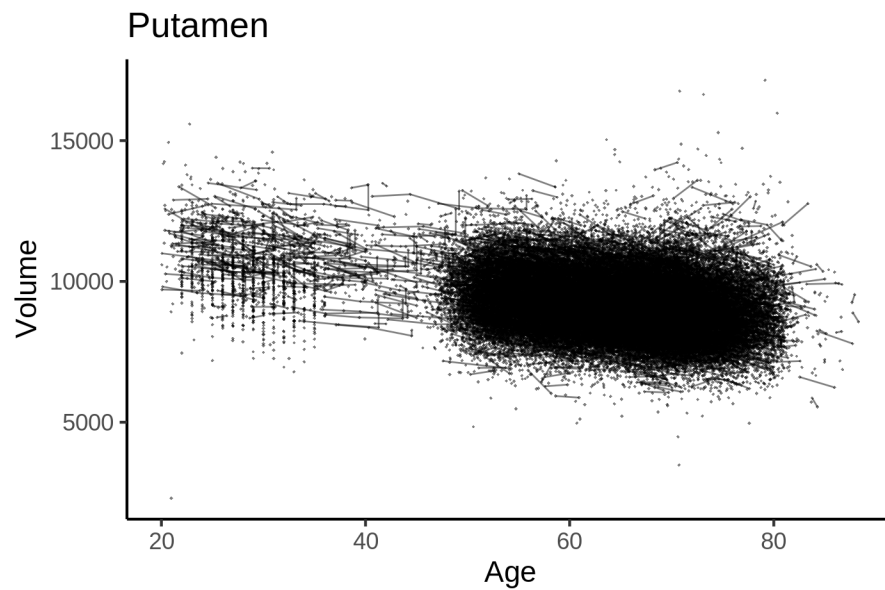

## Models Controlling for ICV

### Model outputs

Model without sleep term

```
##
## Family: gaussian
## Link function: identity
##
## Formula:
## value ~ sex + site + icv + s(age_z, k = 10, bs = "cr")
## <environment: 0x5589874b5b48>
##
## Parametric coefficients:
##              Estimate Std. Error t value Pr(>|t|)
## (Intercept)  8660.652    45.857 188.864 < 2e-16 ***
## sexmale      356.351     9.805  36.344 < 2e-16 ***
## siteMPIB     1261.327    60.397  20.884 < 2e-16 ***
## siteousAvanto 601.474    47.403  12.689 < 2e-16 ***
```

```

## siteousPrisma 768.816 79.984 9.612 < 2e-16 ***
## siteousSkyra 1240.701 45.884 27.040 < 2e-16 ***
## siteUB 778.117 144.440 5.387 7.19e-08 ***
## siteUCAM 667.616 52.094 12.816 < 2e-16 ***
## siteUKB 350.620 46.950 7.468 8.28e-14 ***
## siteUmU 741.738 67.624 10.969 < 2e-16 ***
## siteUOXF 865.579 56.431 15.339 < 2e-16 ***
## icv 494.424 4.918 100.535 < 2e-16 ***
## ---
## Signif. codes: 0 '***' 0.001 '**' 0.01 '*' 0.05 '.' 0.1 ' ' 1
##
## Approximate significance of smooth terms:
## edf Ref.df F p-value
## s(age_z) 5.841 5.841 882.5 <2e-16 ***
## ---
## Signif. codes: 0 '***' 0.001 '**' 0.01 '*' 0.05 '.' 0.1 ' ' 1
##
## R-sq.(adj) = 0.408
## lmer.REML = 8.2883e+05 Scale est. = 35709 n = 51267

```

Model with only main effects of age and sleep

```

##
## Family: gaussian
## Link function: identity
##
## Formula:
## value ~ sex + site + icv + s(age_z, k = 10, bs = "cr") + s(sleep_z,
## k = 5, bs = "cr")
## <environment: 0x5589874b5b48>
##
## Parametric coefficients:
## Estimate Std. Error t value Pr(>|t|)
## (Intercept) 8657.776 45.905 188.601 < 2e-16 ***
## sexmale 356.256 9.805 36.335 < 2e-16 ***
## siteMPIB 1264.461 60.438 20.921 < 2e-16 ***
## siteousAvanto 603.022 47.416 12.718 < 2e-16 ***
## siteousPrisma 769.907 79.987 9.625 < 2e-16 ***
## siteousSkyra 1242.282 45.898 27.066 < 2e-16 ***
## siteUB 778.965 144.440 5.393 6.96e-08 ***
## siteUCAM 669.041 52.105 12.840 < 2e-16 ***
## siteUKB 353.674 47.004 7.524 5.38e-14 ***
## siteUmU 748.207 67.781 11.039 < 2e-16 ***
## siteUOXF 867.024 56.444 15.361 < 2e-16 ***
## icv 494.629 4.920 100.533 < 2e-16 ***
## ---
## Signif. codes: 0 '***' 0.001 '**' 0.01 '*' 0.05 '.' 0.1 ' ' 1
##
## Approximate significance of smooth terms:
## edf Ref.df F p-value
## s(age_z) 5.852 5.852 877.902 <2e-16 ***
## s(sleep_z) 1.000 1.000 1.905 0.168
## ---
## Signif. codes: 0 '***' 0.001 '**' 0.01 '*' 0.05 '.' 0.1 ' ' 1
##

```

```

## R-sq.(adj) = 0.408
## lmer.REML = 8.2883e+05 Scale est. = 35714 n = 51267

Model with full interaction between age and sleep

##
## Family: gaussian
## Link function: identity
##
## Formula:
## value ~ sex + site + icv + t2(age_z, sleep_z, k = c(10, 4), bs = "cr")
## <environment: 0x5589874b5b48>
##
## Parametric coefficients:
##           Estimate Std. Error t value Pr(>|t|)
## (Intercept) 8665.700    46.086 188.032 < 2e-16 ***
## sexmale      356.116     9.823  36.253 < 2e-16 ***
## siteMPIB     1257.823    60.737  20.709 < 2e-16 ***
## siteousAvanto 597.436    47.680  12.530 < 2e-16 ***
## siteousPrisma 765.089    80.154   9.545 < 2e-16 ***
## siteousSkyra 1236.626    46.191  26.772 < 2e-16 ***
## siteUB       771.723   144.527   5.340 9.35e-08 ***
## siteUCAM     661.904    52.387  12.635 < 2e-16 ***
## siteUKB      345.564    47.185   7.324 2.45e-13 ***
## siteUmU      740.230    67.979  10.889 < 2e-16 ***
## siteUOXF     859.264    56.654  15.167 < 2e-16 ***
## icv          494.579     4.921 100.508 < 2e-16 ***
## ---
## Signif. codes:  0 '***' 0.001 '**' 0.01 '*' 0.05 '.' 0.1 ' ' 1
##
## Approximate significance of smooth terms:
##           edf Ref.df    F p-value
## t2(age_z,sleep_z) 8.985  8.985 50.32 <2e-16 ***
## ---
## Signif. codes:  0 '***' 0.001 '**' 0.01 '*' 0.05 '.' 0.1 ' ' 1
##
## R-sq.(adj) = 0.408
## lmer.REML = 8.2883e+05 Scale est. = 35710 n = 51267

```

## Model comparison

mod\_no\_sleep refers to model without sleep term, mod\_no\_interaction refers to model with only main effect of sleep, and mod\_full refers to model with a full interaction between age and sleep. This is a nested model comparison, and the p-value at a given line refers to comparing the model at the line to the model on the line above. Hence, significance implies that the more complicated model is supported on statistical grounds.

To be even more specific, the p-value on the second row tests whether there is an association between sleep and volume. The p-value on the third row tests whether this association depends on age.

```

## Data: NULL
## Models:
## ml$mod_no_sleep$mer: NULL
## ml$mod_no_interaction$mer: NULL
## ml$mod_full$mer: NULL

```

```
##                npar    AIC    BIC  logLik deviance  Chisq Df Pr(>Chisq)
## ml$mod_no_sleep$mer      16 828865 829007 -414417   828833
## ml$mod_no_interaction$mer 18 828867 829026 -414416   828831 1.9049  2    0.3858
## ml$mod_full$mer         20 828875 829052 -414417   828835 0.0000  2    1.0000
```

We chose the model based on the likelihood ratio test with 5 % significance level, which was `mod_no_sleep`.

### Lifespan brain trajectory

The trajectory shown is from the chosen model `mod_no_sleep`.

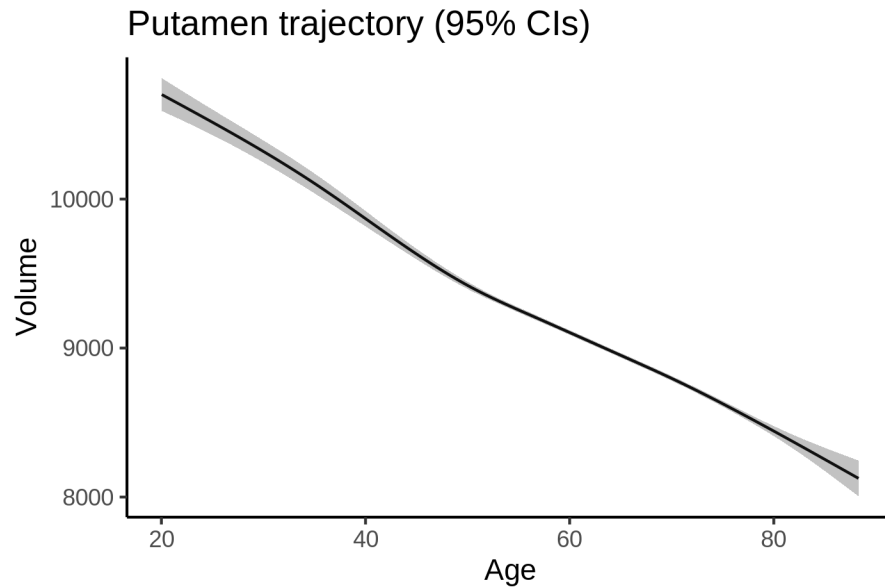

### Effect of sleep

The chosen model did not include a sleep term, and hence we don't have any estimated effect of sleep.

We show the full interaction model for completeness, although it was not selected.

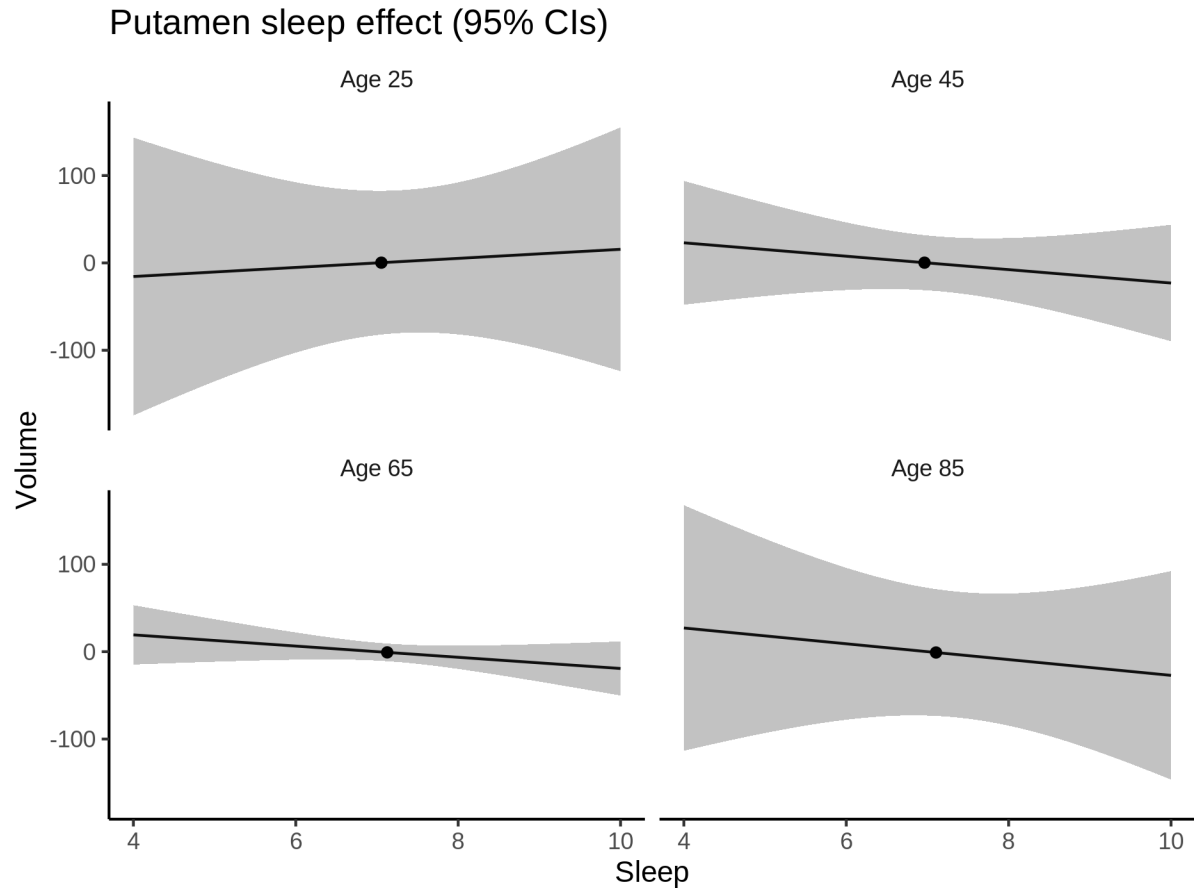

#### Deviation from sleep associated with maximal volume

Model with no sleep term was selected. No plots to show. (Although we can of course dig up the plots, which will be pretty flat).

#### Comparison of mean sleep and sleep associated with maximum volume

Nothing to show, as we did not find an association between sleep and volume.

#### Controlling for covariates

Below is the output for a model in which we only include data with income and education.

```
##
## Family: gaussian
## Link function: identity
##
## Formula:
## value ~ sex + site + s(age_z, k = 10, bs = "cr") + s(sleep_z,
##   k = 5, bs = "cr") + icv
## <environment: 0x558a32330c40>
##
## Parametric coefficients:
```

```

##           Estimate Std. Error t value Pr(>|t|)
## (Intercept) 10049.328   112.262  89.517 < 2e-16 ***
## sexmale      354.242    12.399  28.571 < 2e-16 ***
## siteousAvanto -872.332   130.804 -6.669 2.62e-11 ***
## siteousPrisma -498.491   137.233 -3.632 0.000281 ***
## siteousSkyra  -79.852    122.246 -0.653 0.513627
## siteUKB      -1068.380  111.980 -9.541 < 2e-16 ***
## siteUOXF     -432.870   126.229 -3.429 0.000606 ***
## icv          507.249     6.353  79.850 < 2e-16 ***
## ---
## Signif. codes:  0 '***' 0.001 '**' 0.01 '*' 0.05 '.' 0.1 ' ' 1
##
## Approximate significance of smooth terms:
##           edf Ref.df      F p-value
## s(age_z)   3.752  3.752 651.974 <2e-16 ***
## s(sleep_z) 2.217  2.217  2.369   0.11
## ---
## Signif. codes:  0 '***' 0.001 '**' 0.01 '*' 0.05 '.' 0.1 ' ' 1
##
## R-sq.(adj) =  0.387
## lmer.REML = 5.0382e+05  Scale est. = 34651      n = 31186

```

Below is the output for a model in which we control for the main effects of income and education.

```

##
## Family: gaussian
## Link function: identity
##
## Formula:
## value ~ sex + site + s(age_z, k = 10, bs = "cr") + s(sleep_z,
##           k = 5, bs = "cr") + icv + income_scaled + education_scaled
## <environment: 0x558a32330c40>
##
## Parametric coefficients:
##           Estimate Std. Error t value Pr(>|t|)
## (Intercept) 10061.955   112.932  89.098 < 2e-16 ***
## sexmale      354.119    12.434  28.481 < 2e-16 ***
## siteousAvanto -871.914   130.835 -6.664 2.71e-11 ***
## siteousPrisma -497.218   137.236 -3.623 0.000292 ***
## siteousSkyra  -79.371    122.283 -0.649 0.516294
## siteUKB      -1067.918  112.018 -9.533 < 2e-16 ***
## siteUOXF     -436.508   126.272 -3.457 0.000547 ***
## icv          508.028     6.406  79.302 < 2e-16 ***
## income_scaled  -6.705    14.749 -0.455 0.649383
## education_scaled -12.645   17.483 -0.723 0.469495
## ---
## Signif. codes:  0 '***' 0.001 '**' 0.01 '*' 0.05 '.' 0.1 ' ' 1
##
## Approximate significance of smooth terms:
##           edf Ref.df      F p-value
## s(age_z)   3.719  3.719 617.592 <2e-16 ***
## s(sleep_z) 2.042  2.042  2.232   0.115
## ---
## Signif. codes:  0 '***' 0.001 '**' 0.01 '*' 0.05 '.' 0.1 ' ' 1
##

```

```
## R-sq.(adj) = 0.386
## lmer.REML = 5.0381e+05 Scale est. = 34643 n = 31186
```

We also included interaction effects between sleep duration and education and income, in another model. The output is shown below, and the interaction terms are `income_scaled:sleep_z` and `education_scaled:sleep_z`.

```
##
## Family: gaussian
## Link function: identity
##
## Formula:
## value ~ sex + site + s(age_z, k = 10, bs = "cr") + s(sleep_z,
##     k = 5, bs = "cr") + icv + income_scaled + education_scaled +
##     income_scaled:sleep_z + education_scaled:sleep_z
## <environment: 0x558a32330c40>
##
## Parametric coefficients:
##               Estimate Std. Error t value Pr(>|t|)
## (Intercept)   10062.1118   112.9220  89.107 < 2e-16 ***
## sexmale        353.4411    12.4417  28.408 < 2e-16 ***
## siteousAvanto -873.3061    130.8372  -6.675 2.52e-11 ***
## siteousPrisma -499.4219    137.2486  -3.639 0.000274 ***
## siteousSkyra  -80.7757    122.2793  -0.661 0.508884
## siteUKB       -1067.0967   112.0261  -9.525 < 2e-16 ***
## siteUOXF      -432.5819   126.3073  -3.425 0.000616 ***
## icv           507.9083     6.4054   79.293 < 2e-16 ***
## income_scaled  -6.4504    14.7334  -0.438 0.661527
## education_scaled -13.4372   17.4750  -0.769 0.441935
## income_scaled:sleep_z -30.1961   14.6258  -2.065 0.038971 *
## education_scaled:sleep_z -0.9861   16.9172  -0.058 0.953516
## ---
## Signif. codes:  0 '***' 0.001 '**' 0.01 '*' 0.05 '.' 0.1 ' ' 1
##
## Approximate significance of smooth terms:
##               edf Ref.df      F p-value
## s(age_z)      3.737  3.737 613.922 <2e-16 ***
## s(sleep_z)    1.039  1.039  0.027  0.901
## ---
## Signif. codes:  0 '***' 0.001 '**' 0.01 '*' 0.05 '.' 0.1 ' ' 1
##
## R-sq.(adj) = 0.386
## lmer.REML = 5.0379e+05 Scale est. = 34644 n = 31186
```

We did the same controlling for BMI. Below is the model with no covariates but only keeping data with BMI.

```
##
## Family: gaussian
## Link function: identity
##
## Formula:
## value ~ sex + site + s(age_z, k = 10, bs = "cr") + s(sleep_z,
##     k = 5, bs = "cr") + icv
## <environment: 0x558a492785d8>
##
## Parametric coefficients:
```

```

##           Estimate Std. Error t value Pr(>|t|)
## (Intercept)  9191.331    67.326 136.519 < 2e-16 ***
## sexmale      348.376    12.049  28.912 < 2e-16 ***
## siteousPrisma 231.745    90.517   2.560 0.01046 *
## siteousSkyra 726.704    46.917  15.489 < 2e-16 ***
## siteUCAM     127.327    72.429   1.758 0.07877 .
## siteUKB     -192.377    68.006  -2.829 0.00467 **
## siteUmU     213.690    84.006   2.544 0.01097 *
## icv         514.064     6.193  83.011 < 2e-16 ***
## ---
## Signif. codes:  0 '***' 0.001 '**' 0.01 '*' 0.05 '.' 0.1 ' ' 1
##
## Approximate significance of smooth terms:
##           edf Ref.df      F p-value
## s(age_z)   5.242  5.242 636.470 <2e-16 ***
## s(sleep_z) 1.946  1.946   2.821  0.0432 *
## ---
## Signif. codes:  0 '***' 0.001 '**' 0.01 '*' 0.05 '.' 0.1 ' ' 1
##
## R-sq.(adj) =  0.412
## lmer.REML = 5.3976e+05  Scale est. = 33998      n = 33441

```

Below is the model output with main effect.

```

##
## Family: gaussian
## Link function: identity
##
## Formula:
## value ~ sex + site + s(age_z, k = 10, bs = "cr") + s(sleep_z,
##           k = 5, bs = "cr") + icv + bmi
## <environment: 0x558a492785d8>
##
## Parametric coefficients:
##           Estimate Std. Error t value Pr(>|t|)
## (Intercept)  8987.949    73.524 122.246 < 2e-16 ***
## sexmale      341.964    12.077  28.316 < 2e-16 ***
## siteousPrisma 226.004    90.490   2.498 0.01251 *
## siteousSkyra 726.161    46.921  15.476 < 2e-16 ***
## siteUCAM     123.561    72.408   1.706 0.08793 .
## siteUKB     -198.991    68.007  -2.926 0.00344 **
## siteUmU     205.474    83.985   2.447 0.01443 *
## icv         512.709     6.188  82.859 < 2e-16 ***
## bmi          8.076     1.173   6.882 5.99e-12 ***
## ---
## Signif. codes:  0 '***' 0.001 '**' 0.01 '*' 0.05 '.' 0.1 ' ' 1
##
## Approximate significance of smooth terms:
##           edf Ref.df      F p-value
## s(age_z)   5.284  5.284 633.476 <2e-16 ***
## s(sleep_z) 1.121  1.121   3.087  0.063 .
## ---
## Signif. codes:  0 '***' 0.001 '**' 0.01 '*' 0.05 '.' 0.1 ' ' 1
##
## R-sq.(adj) =  0.413

```



```
## lmer.REML = 5.3972e+05 Scale est. = 34005 n = 33441
```

Next is the model with BMI-sleep interaction.

```
##
## Family: gaussian
## Link function: identity
##
## Formula:
## value ~ sex + site + s(age_z, k = 10, bs = "cr") + s(sleep_z,
##     k = 5, bs = "cr") + icv + bmi + bmi:sleep_z
## <environment: 0x558a492785d8>
##
## Parametric coefficients:
##           Estimate Std. Error t value Pr(>|t|)
## (Intercept)  8984.548    73.563 122.134 < 2e-16 ***
## sexmale      342.034    12.077  28.322 < 2e-16 ***
## siteousPrisma 225.966    90.489   2.497 0.01252 *
## siteousSkyra 726.407    46.921  15.482 < 2e-16 ***
## siteUCAM     124.752    72.412   1.723 0.08493 .
## siteUKB     -197.790    68.010  -2.908 0.00364 **
## siteUmU      206.498    83.986   2.459 0.01395 *
## icv          512.778     6.188  82.867 < 2e-16 ***
## bmi           8.129     1.174   6.923 4.49e-12 ***
## bmi:sleep_z   1.573     1.110   1.417 0.15658
## ---
## Signif. codes:  0 '***' 0.001 '**' 0.01 '*' 0.05 '.' 0.1 ' ' 1
##
## Approximate significance of smooth terms:
##           edf Ref.df      F p-value
## s(age_z)   5.282  5.282 634.13 <2e-16 ***
## s(sleep_z) 1.165  1.165   2.27  0.104
## ---
## Signif. codes:  0 '***' 0.001 '**' 0.01 '*' 0.05 '.' 0.1 ' ' 1
##
## R-sq.(adj) =  0.413
## lmer.REML = 5.3971e+05 Scale est. = 34003 n = 33441
```

We did the same controlling for depression. Below is the model with no covariates but only keeping data with depression.

```
##
## Family: gaussian
## Link function: identity
##
## Formula:
## value ~ sex + site + s(age_z, k = 10, bs = "cr") + s(sleep_z,
##     k = 5, bs = "cr") + icv
## <environment: 0x558a477b4d88>
##
## Parametric coefficients:
##           Estimate Std. Error t value Pr(>|t|)
## (Intercept)  9820.411    57.732 170.102 < 2e-16 ***
## sexmale      350.715    12.081  29.030 < 2e-16 ***
## siteousAvanto -650.538   110.289  -5.898 3.70e-09 ***
## siteousPrisma -333.675   107.387  -3.107 0.00189 **
```

```

## siteousSkyra 139.312 85.224 1.635 0.10213
## siteUCAM -501.535 78.792 -6.365 1.97e-10 ***
## siteUKB -830.330 57.098 -14.542 < 2e-16 ***
## siteUmU -423.561 77.286 -5.480 4.27e-08 ***
## icv 510.361 6.201 82.300 < 2e-16 ***
## ---
## Signif. codes: 0 '***' 0.001 '**' 0.01 '*' 0.05 '.' 0.1 ' ' 1
##
## Approximate significance of smooth terms:
## edf Ref.df F p-value
## s(age_z) 5.705 5.705 503.751 <2e-16 ***
## s(sleep_z) 2.070 2.070 3.436 0.0366 *
## ---
## Signif. codes: 0 '***' 0.001 '**' 0.01 '*' 0.05 '.' 0.1 ' ' 1
##
## R-sq.(adj) = 0.402
## lmer.REML = 5.3801e+05 Scale est. = 34333 n = 33353

```

Below is the model output with main effect.

```

##
## Family: gaussian
## Link function: identity
##
## Formula:
## value ~ sex + site + s(age_z, k = 10, bs = "cr") + s(sleep_z,
## k = 5, bs = "cr") + icv + depression
## <environment: 0x558a477b4d88>
##
## Parametric coefficients:
## Estimate Std. Error t value Pr(>|t|)
## (Intercept) 9817.464 57.979 169.328 < 2e-16 ***
## sexmale 351.032 12.094 29.026 < 2e-16 ***
## siteousAvanto -652.237 110.329 -5.912 3.42e-09 ***
## siteousPrisma -335.222 107.421 -3.121 0.00181 **
## siteousSkyra 137.423 85.284 1.611 0.10711
## siteUCAM -502.277 78.805 -6.374 1.87e-10 ***
## siteUKB -829.151 57.142 -14.510 < 2e-16 ***
## siteUmU -432.697 78.926 -5.482 4.23e-08 ***
## icv 510.307 6.201 82.288 < 2e-16 ***
## depression 24.531 43.146 0.569 0.56967
## ---
## Signif. codes: 0 '***' 0.001 '**' 0.01 '*' 0.05 '.' 0.1 ' ' 1
##
## Approximate significance of smooth terms:
## edf Ref.df F p-value
## s(age_z) 5.714 5.714 493.225 <2e-16 ***
## s(sleep_z) 1.971 1.971 2.882 0.0442 *
## ---
## Signif. codes: 0 '***' 0.001 '**' 0.01 '*' 0.05 '.' 0.1 ' ' 1
##
## R-sq.(adj) = 0.402
## lmer.REML = 5.38e+05 Scale est. = 34337 n = 33353

```

Next is the model with depression-sleep interaction.

```

##
## Family: gaussian
## Link function: identity
##
## Formula:
## value ~ sex + site + s(age_z, k = 10, bs = "cr") + s(sleep_z,
##       k = 5, bs = "cr") + icv + depression + depression:sleep_z
## <environment: 0x5558a477b4d88>
##
## Parametric coefficients:
##           Estimate Std. Error t value Pr(>|t|)
## (Intercept)   9817.443     57.980 169.325 < 2e-16 ***
## sexmale        350.946     12.096  29.014 < 2e-16 ***
## siteousAvanto -652.692    110.338  -5.915 3.34e-09 ***
## siteousPrisma -335.679    107.431  -3.125 0.00178 **
## siteousSkyra   136.999     85.295   1.606 0.10824
## siteUCAM      -502.832     78.821  -6.379 1.80e-10 ***
## siteUKB       -829.078     57.143 -14.509 < 2e-16 ***
## siteUmU       -428.918     79.588  -5.389 7.12e-08 ***
## icv           510.325      6.202  82.288 < 2e-16 ***
## depression     23.341     43.231   0.540 0.58926
## depression:sleep_z -11.297    31.614  -0.357 0.72084
## ---
## Signif. codes:  0 '***' 0.001 '**' 0.01 '*' 0.05 '.' 0.1 ' ' 1
##
## Approximate significance of smooth terms:
##           edf Ref.df      F p-value
## s(age_z)   5.710  5.710 493.568 <2e-16 ***
## s(sleep_z) 2.016  2.016   2.093  0.134
## ---
## Signif. codes:  0 '***' 0.001 '**' 0.01 '*' 0.05 '.' 0.1 ' ' 1
##
## R-sq.(adj) =  0.402
## lmer.REML = 5.3799e+05  Scale est. = 34336      n = 33353

```

The plot below shows the sleep-volume curve for the original model and for the model with main effects of SES.

Putamen sleep effect, covariates

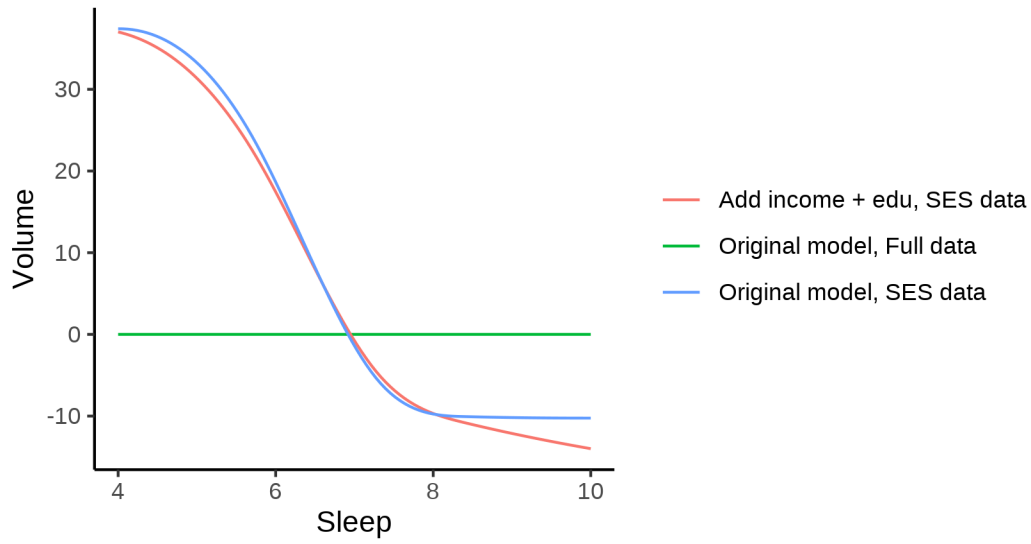

The plot below shows the sleep-volume curve for the original model and for the model with main effects of BMI.

Putamen sleep effect, covariates

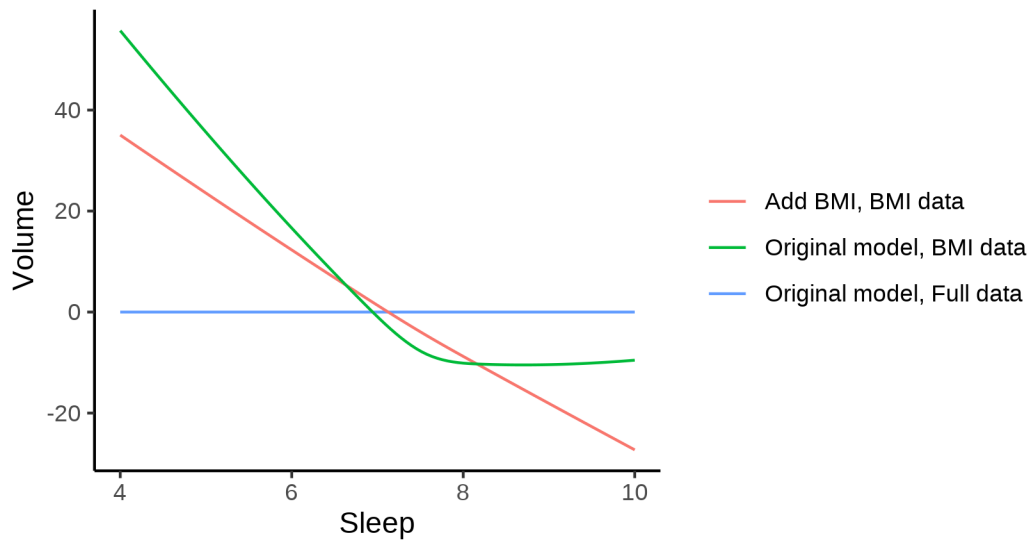

The plot below shows the sleep-volume curve for the original model and for the model with main effects of depression.

## Putamen sleep effect, covariates

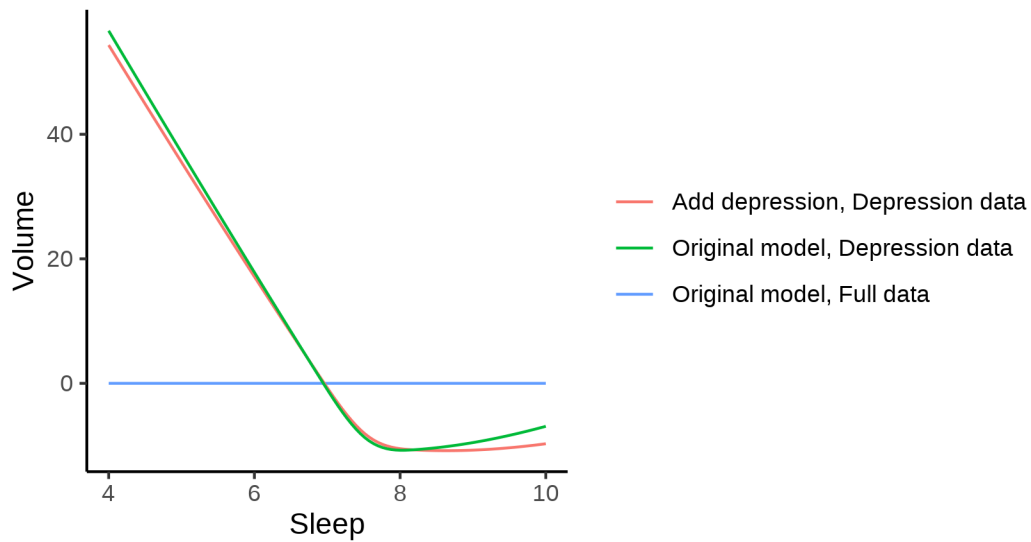

## Models Not controlling for ICV

### Model outputs

Model without sleep term

```
##
## Family: gaussian
## Link function: identity
##
## Formula:
## value ~ sex + site + s(age_z, k = 10, bs = "cr")
## <environment: 0x558a5ec4d420>
##
## Parametric coefficients:
##              Estimate Std. Error t value Pr(>|t|)
## (Intercept)  8394.850    46.279 181.396 < 2e-16 ***
## sexmale      917.731     8.866 103.506 < 2e-16 ***
## siteMPIB     460.767    64.023   7.197 6.25e-13 ***
## siteousAvanto 807.199    50.782  15.895 < 2e-16 ***
## siteousPrisma 908.611    86.455  10.510 < 2e-16 ***
## siteousSkyra 1268.613   49.354  25.704 < 2e-16 ***
## siteUB       626.912   157.898   3.970 7.19e-05 ***
## siteUCAM     686.643    55.255  12.427 < 2e-16 ***
## siteUKB      359.302    47.344   7.589 3.27e-14 ***
## siteUmU      534.742    72.140   7.413 1.26e-13 ***
## siteUOXF     745.105    58.726  12.688 < 2e-16 ***
## ---
## Signif. codes:  0 '***' 0.001 '**' 0.01 '*' 0.05 '.' 0.1 ' ' 1
##
## Approximate significance of smooth terms:
##              edf Ref.df   F p-value
## s(age_z)    3.122  3.122 1727 <2e-16 ***
```

```
## ---
## Signif. codes:  0 '***' 0.001 '**' 0.01 '*' 0.05 '.' 0.1 ' ' 1
##
## R-sq.(adj) =  0.284
## lmer.REML = 8.3802e+05  Scale est. = 37539      n = 51267
```

Model with only main effects of age and sleep

```
##
## Family: gaussian
## Link function: identity
##
## Formula:
## value ~ sex + site + s(age_z, k = 10, bs = "cr") + s(sleep_z,
##      k = 5, bs = "cr")
## <environment: 0x558a5ec4d420>
##
## Parametric coefficients:
##              Estimate Std. Error t value Pr(>|t|)
## (Intercept)   8400.02    46.30 181.418 < 2e-16 ***
## sexmale        916.89     8.87 103.368 < 2e-16 ***
## siteMPIB       458.28    64.03   7.157 8.37e-13 ***
## siteousAvanto  803.74    50.79  15.824 < 2e-16 ***
## siteousPrisma  905.91    86.45  10.479 < 2e-16 ***
## siteousSkyra  1265.06    49.36  25.628 < 2e-16 ***
## siteUB         627.80   157.88   3.976 7.00e-05 ***
## siteUCAM       685.49    55.24  12.408 < 2e-16 ***
## siteUKB        354.29    47.36   7.480 7.54e-14 ***
## siteUmU        528.21    72.27   7.309 2.73e-13 ***
## siteUOXF       742.84    58.71  12.653 < 2e-16 ***
```

```
## ---
## Signif. codes:  0 '***' 0.001 '**' 0.01 '*' 0.05 '.' 0.1 ' ' 1
##
## Approximate significance of smooth terms:
##              edf Ref.df      F p-value
## s(age_z)     3.111  3.111 1724.659 <2e-16 ***
## s(sleep_z)   2.299  2.299   4.241  0.0222 *
```

```
## ---
## Signif. codes:  0 '***' 0.001 '**' 0.01 '*' 0.05 '.' 0.1 ' ' 1
##
## R-sq.(adj) =  0.284
## lmer.REML = 8.3801e+05  Scale est. = 37541      n = 51267
```

Model with full interaction between age and sleep

```
##
## Family: gaussian
## Link function: identity
##
## Formula:
## value ~ sex + site + t2(age_z, sleep_z, k = c(10, 4), bs = "cr")
## <environment: 0x558a5ec4d420>
##
## Parametric coefficients:
##              Estimate Std. Error t value Pr(>|t|)
## (Intercept)   8416.87    45.56 184.758 < 2e-16 ***
```

```

## sexmale          918.46          8.88 103.436 < 2e-16 ***
## siteMPIB         438.88          63.84  6.874 6.30e-12 ***
## siteousAvanto    793.82          50.81 15.623 < 2e-16 ***
## siteousPrisma    897.06          86.54 10.366 < 2e-16 ***
## siteousSkyra     1254.29         49.40 25.388 < 2e-16 ***
## siteUB           605.02        157.71  3.836 0.000125 ***
## siteUCAM         666.94          55.00 12.126 < 2e-16 ***
## siteUKB          336.23          46.57  7.221 5.25e-13 ***
## siteUmU          509.92          71.89  7.093 1.33e-12 ***
## siteUOXF         722.31          58.21 12.408 < 2e-16 ***
## ---
## Signif. codes:  0 '***' 0.001 '**' 0.01 '*' 0.05 '.' 0.1 ' ' 1
##
## Approximate significance of smooth terms:
##                edf Ref.df      F p-value
## t2(age_z,sleep_z) 4.959  4.959 377.2 <2e-16 ***
## ---
## Signif. codes:  0 '***' 0.001 '**' 0.01 '*' 0.05 '.' 0.1 ' ' 1
##
## R-sq.(adj) =  0.284
## lmer.REML = 8.3801e+05  Scale est. = 37523      n = 51267

```

## Model comparison

`mod_no_sleep` refers to model without sleep term, `mod_no_interaction` refers to model with only main effect of sleep, and `mod_full` refers to model with a full interaction between age and sleep. This is a nested model comparison, and the p-value at a given line refers to comparing the model at the line to the model on the line above. Hence, significance implies that the more complicated model is supported on statistical grounds.

To be even more specific, the p-value on the second row tests whether there is an association between sleep and volume. The p-value on the third row tests whether this association depends on age.

```

## Data: NULL
## Models:
## ml$mod_no_sleep$mer: NULL
## ml$mod_no_interaction$mer: NULL
## ml$mod_full$mer: NULL
##
##                npar      AIC      BIC logLik deviance Chisq Df Pr(>Chisq)
## ml$mod_no_sleep$mer      15 838046 838179 -419008  838016
## ml$mod_no_interaction$mer  17 838045 838196 -419006  838011 4.9073  2  0.08598 .
## ml$mod_full$mer          19 838050 838218 -419006  838012 0.0000  2  1.00000
## ---
## Signif. codes:  0 '***' 0.001 '**' 0.01 '*' 0.05 '.' 0.1 ' ' 1

```

We chose the model based on the likelihood ratio test with 5 % significance level, which was `mod_no_sleep`.

## Lifespan brain trajectory

The trajectory shown is from the chosen model `mod_no_sleep_no_icv`.

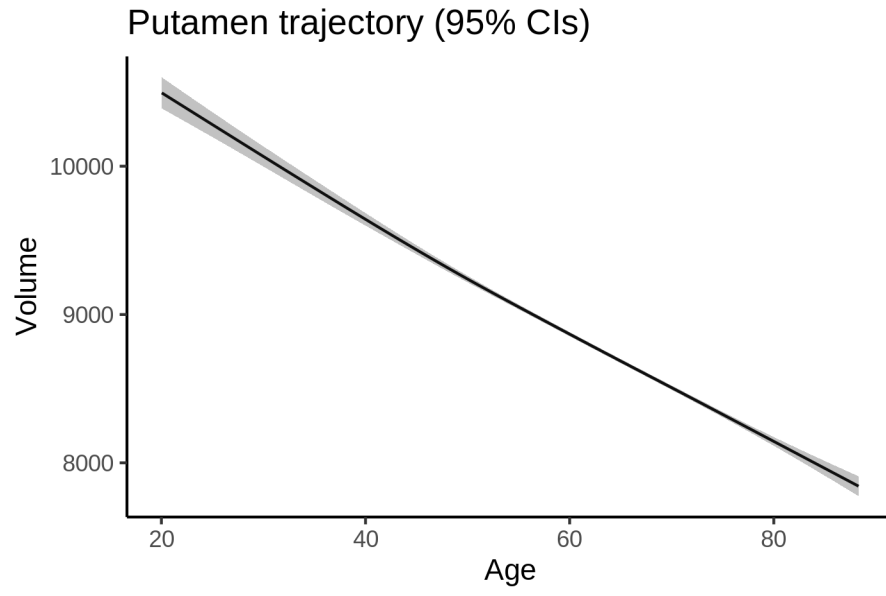

#### Effect of sleep

The chosen model did not include a sleep term, and hence we don't have any estimated effect of sleep.

We show the full interaction model for completeness, although it was not selected.



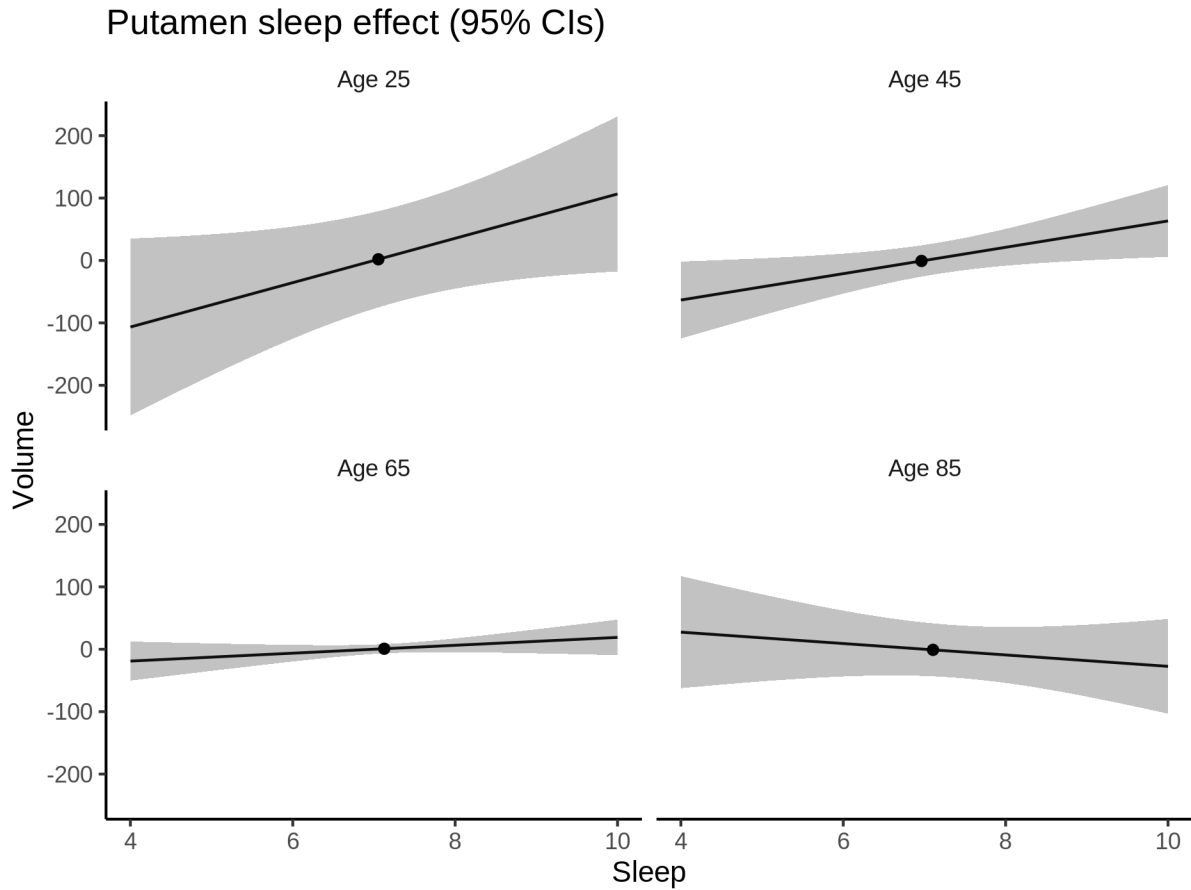

### Deviation from sleep associated with maximal volume

Model with no sleep term was selected. No plots to show. (Although we can of course dig up the plots, which will be pretty flat).

### Comparison of mean sleep and sleep associated with maximum volume

Nothing to show, as we did not find an association between sleep and volume.

## Thalamus

### Descriptive statistics

| Study | Observations | Unique IDs | Mean age | Age range |
|-------|--------------|------------|----------|-----------|
| HCP   | 974          | 974        | 28.8     | 22 - 37   |
| MPIB  | 677          | 391        | 63.1     | 24 - 83   |
| UB    | 113          | 39         | 70.9     | 64 - 81   |
| UCAM  | 884          | 632        | 55.1     | 20 - 88   |
| UiO   | 1475         | 803        | 49.4     | 20 - 89   |
| UKB   | 45975        | 43133      | 64.5     | 45 - 83   |

| Study | Observations | Unique IDs | Mean age | Age range |
|-------|--------------|------------|----------|-----------|
| UmU   | 412          | 279        | 62.2     | 25 - 85   |
| UOXF  | 769          | 769        | 69.8     | 60 - 85   |

## Spaghetti plot

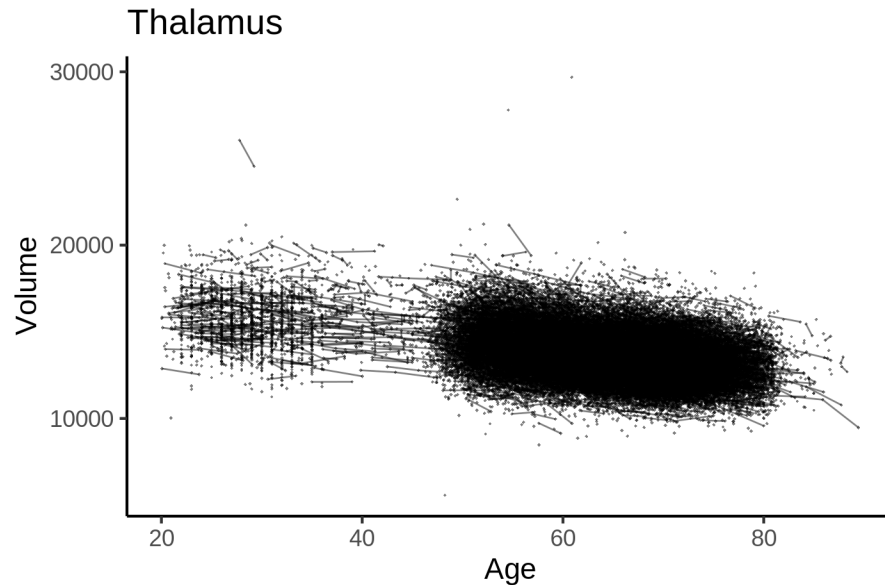

## Models Controlling for ICV

### Model outputs

Model without sleep term

```
##
## Family: gaussian
## Link function: identity
##
## Formula:
## value ~ sex + site + icv + s(age_z, k = 10, bs = "cr")
## <environment: 0x558a46b9f400>
##
## Parametric coefficients:
##              Estimate Std. Error t value Pr(>|t|)
## (Intercept) 13374.197   52.690 253.829 < 2e-16 ***
## sexmale      196.535    10.656  18.443 < 2e-16 ***
## siteMPIB     1615.000    66.774  24.186 < 2e-16 ***
## siteousAvanto 306.728    54.190   5.660 1.52e-08 ***
## siteousPrisma 1062.084    91.547  11.601 < 2e-16 ***
## siteousSkyra  409.248    50.894   8.041 9.08e-16 ***
## siteUB       1054.097   155.949   6.759 1.40e-11 ***
## siteUCAM     1053.651    57.958  18.180 < 2e-16 ***
## siteUKB       206.072    54.054   3.812 0.000138 ***
## siteUmU      -5.011    74.885  -0.067 0.946653
```

```

## siteUOXF      911.661      63.799  14.290 < 2e-16 ***
## icv           880.554       5.360 164.285 < 2e-16 ***
## ---
## Signif. codes:  0 '***' 0.001 '**' 0.01 '*' 0.05 '.' 0.1 ' ' 1
##
## Approximate significance of smooth terms:
##           edf Ref.df      F p-value
## s(age_z)  7.872  7.872 1553 <2e-16 ***
## ---
## Signif. codes:  0 '***' 0.001 '**' 0.01 '*' 0.05 '.' 0.1 ' ' 1
##
## R-sq.(adj) =  0.581
## lmer.REML = 8.4013e+05  Scale est. = 79442      n = 51279

```

Model with only main effects of age and sleep

```

##
## Family: gaussian
## Link function: identity
##
## Formula:
## value ~ sex + site + icv + s(age_z, k = 10, bs = "cr") + s(sleep_z,
##           k = 5, bs = "cr")
## <environment: 0x558a46b9f400>
##
## Parametric coefficients:
##           Estimate Std. Error t value Pr(>|t|)
## (Intercept) 13368.382    52.736 253.498 < 2e-16 ***
## sexmale      196.118     10.654  18.408 < 2e-16 ***
## siteMPIB     1624.839     66.800  24.324 < 2e-16 ***
## siteousAvanto 308.695     54.198   5.696 1.24e-08 ***
## siteousPrisma 1063.405     91.530  11.618 < 2e-16 ***
## siteousSkyra  410.849     50.902   8.071 7.10e-16 ***
## siteUB       1060.364    155.893   6.802 1.04e-11 ***
## siteUCAM     1058.914     57.954  18.272 < 2e-16 ***
## siteUKB      212.312     54.106   3.924 8.72e-05 ***
## siteUmU       15.872     75.041   0.212  0.832
## siteUOXF     914.842     63.795  14.340 < 2e-16 ***
## icv          880.447      5.364 164.139 < 2e-16 ***
## ---
## Signif. codes:  0 '***' 0.001 '**' 0.01 '*' 0.05 '.' 0.1 ' ' 1
##
## Approximate significance of smooth terms:
##           edf Ref.df      F p-value
## s(age_z)   7.877  7.877 1535.12 < 2e-16 ***
## s(sleep_z) 3.022  3.022   9.21 4.36e-06 ***
## ---
## Signif. codes:  0 '***' 0.001 '**' 0.01 '*' 0.05 '.' 0.1 ' ' 1
##
## R-sq.(adj) =  0.582
## lmer.REML = 8.401e+05  Scale est. = 79512      n = 51279

```

Model with full interaction between age and sleep

```

##
## Family: gaussian

```

```

## Link function: identity
##
## Formula:
## value ~ sex + site + icv + t2(age_z, sleep_z, k = c(10, 4), bs = "cr")
## <environment: 0x558a46b9f400>
##
## Parametric coefficients:
##           Estimate Std. Error t value Pr(>|t|)
## (Intercept) 13370.914    52.932 252.606 < 2e-16 ***
## sexmale      195.794     10.678  18.336 < 2e-16 ***
## siteMPIB     1622.533     67.162  24.159 < 2e-16 ***
## siteousAvanto 309.117     54.486   5.673 1.41e-08 ***
## siteousPrisma 1062.759     91.746  11.584 < 2e-16 ***
## siteousSkyra  412.162     51.227   8.046 8.75e-16 ***
## siteUB       1053.712    156.009   6.754 1.45e-11 ***
## siteUCAM     1056.239     58.271  18.126 < 2e-16 ***
## siteUKB      209.811     54.300   3.864 0.000112 ***
## siteUmU       11.574     75.281   0.154 0.877813
## siteUOXF     911.530     64.031  14.236 < 2e-16 ***
## icv          880.730      5.363 164.223 < 2e-16 ***
## ---
## Signif. codes:  0 '***' 0.001 '**' 0.01 '*' 0.05 '.' 0.1 ' ' 1
##
## Approximate significance of smooth terms:
##           edf Ref.df    F p-value
## t2(age_z,sleep_z) 14.55 14.55 33.02 <2e-16 ***
## ---
## Signif. codes:  0 '***' 0.001 '**' 0.01 '*' 0.05 '.' 0.1 ' ' 1
##
## R-sq.(adj) = 0.582
## lmer.REML = 8.4011e+05 Scale est. = 79483    n = 51279

```

## Model comparison

mod\_no\_sleep refers to model without sleep term, mod\_no\_interaction refers to model with only main effect of sleep, and mod\_full refers to model with a full interaction between age and sleep. This is a nested model comparison, and the p-value at a given line refers to comparing the model at the line to the model on the line above. Hence, significance implies that the more complicated model is supported on statistical grounds.

To be even more specific, the p-value on the second row tests whether there is an association between sleep and volume. The p-value on the third row tests whether this association depends on age.

```

## Data: NULL
## Models:
## ml$mod_no_sleep$mer: NULL
## ml$mod_no_interaction$mer: NULL
## ml$mod_full$mer: NULL
##           npar    AIC    BIC logLik deviance Chisq Df Pr(>Chisq)
## ml$mod_no_sleep$mer      16 840158 840299 -420063    840126
## ml$mod_no_interaction$mer  18 840139 840298 -420051    840103 22.987  2 1.02e-05 ***
## ml$mod_full$mer          20 840153 840329 -420056    840113  0.000  2      1
## ---
## Signif. codes:  0 '***' 0.001 '**' 0.01 '*' 0.05 '.' 0.1 ' ' 1

```

We chose the model based on the likelihood ratio test with 5 % significance level, which was `mod_no_interaction`.

### Lifespan brain trajectory

The trajectory shown is from the chosen model `mod_no_interaction`.

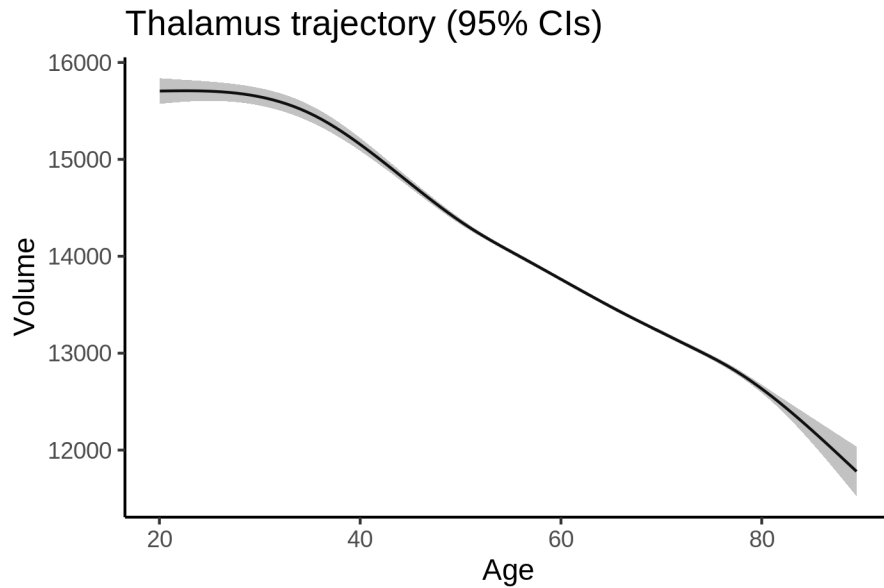

### Effect of sleep

The chosen model only included the main effect of sleep, and hence the effect does not vary with age. The black dot shows the average sleep duration across all ages in the sample.

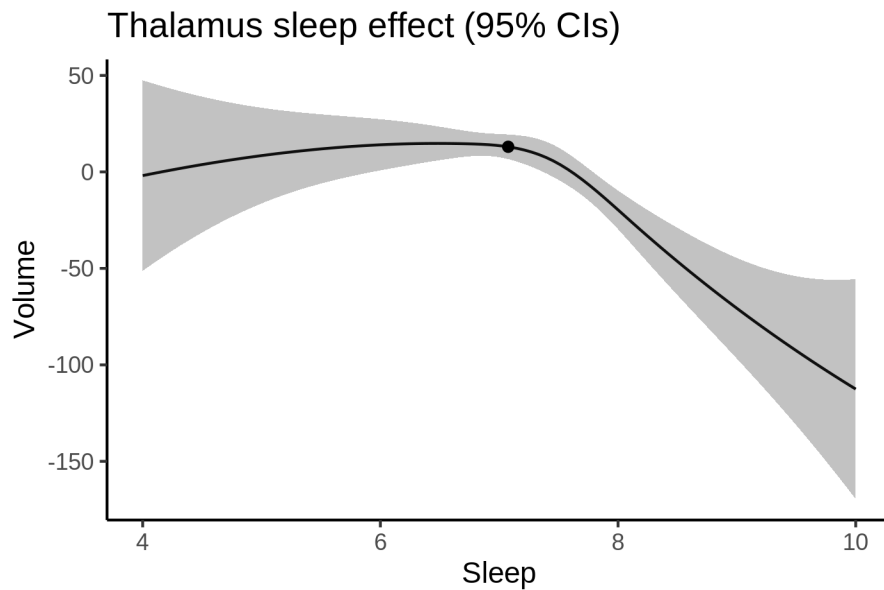

We also show the full interaction model for completeness, although it was not selected.

### Thalamus sleep effect (95% CIs)

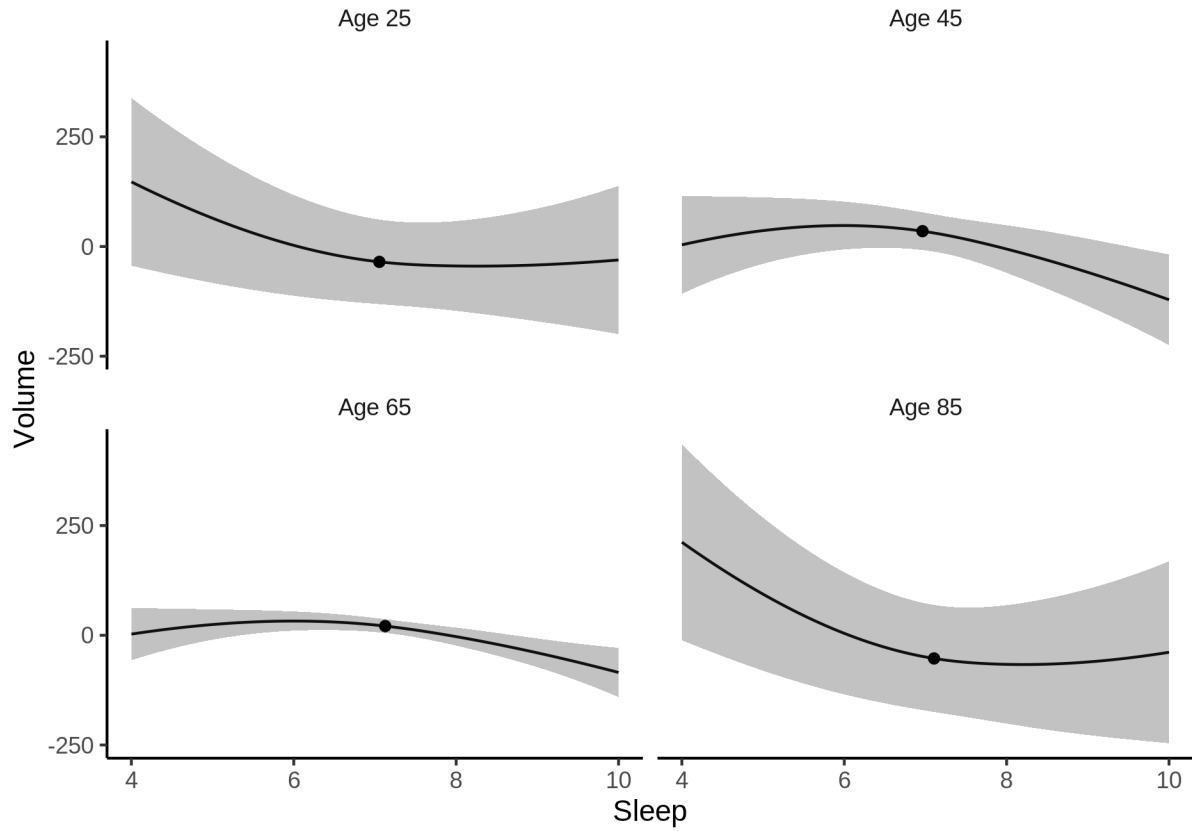

### Deviation from sleep associated with maximal volume

Model with only main effect of sleep was chosen, so we show it for all ages at once. Maximum volume is attained at 6.5 hours of sleep. The percentage values in the plot are calculated as follows: The maximum at 100 % refers to a person at an arbitrary age with a sleep duration associated with maximum volume. For a female, this volume is 14077 and for a male it is 14273. The other percentage values show how large the expected volume is for someone with other sleep durations. For example, 99 % implies a 1 % reduction.

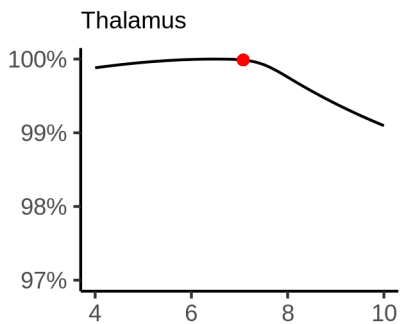

### Comparison of mean sleep and sleep associated with maximum volume

A 95 % confidence interval for the sleep associated with maximum volume is [4, 7.15].

The plot below compares average sleep to the sleep associated with maximum volume.

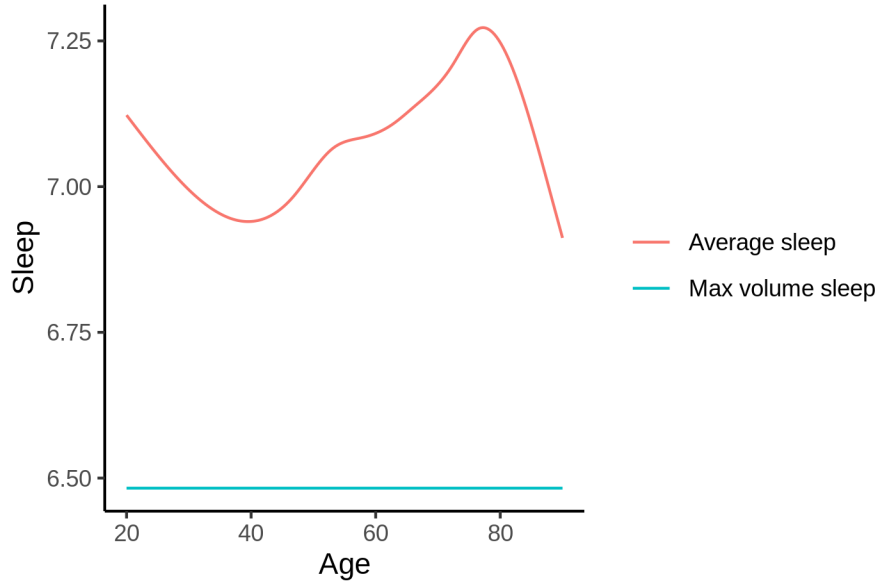

The next plot shows the difference between average sleep and sleep associated with maximum volume. The shaded region is a 95 % confidence interval.

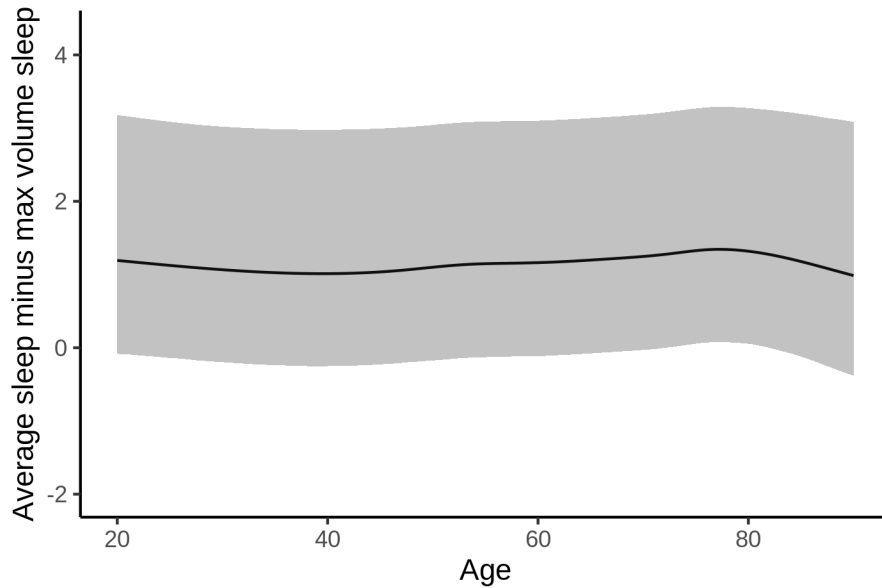

The next plot shows the probability that the sleep duration associated with maximum volume is longer than the average sleep duration, as a function of age. Probability below .05 can be interpreted as evidence that the sleep associated with maximum volume is shorter than the mean sleep, and probability above .95 can be interpreted the opposite way.

## Is max volume at above average sleep?

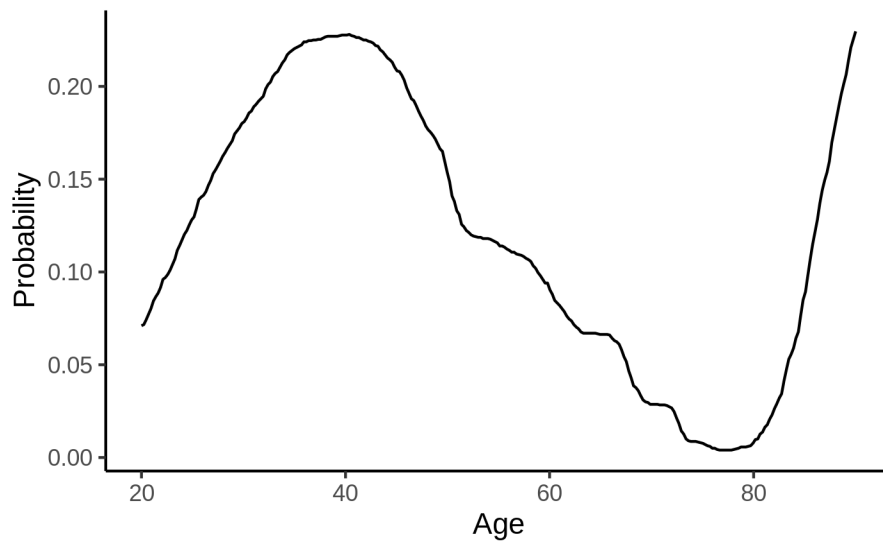

## Controlling for covariates

Below is the output for a model in which we only include data with income and education.

```
##
## Family: gaussian
## Link function: identity
##
## Formula:
## value ~ sex + site + s(age_z, k = 10, bs = "cr") + s(sleep_z,
##   k = 5, bs = "cr") + icv
## <environment: 0x55896133bb60>
##
## Parametric coefficients:
##           Estimate Std. Error t value Pr(>|t|)
## (Intercept) 15076.901   120.778  124.832 < 2e-16 ***
## sexmale      174.596     13.418   13.012 < 2e-16 ***
## siteousAvanto -1709.261   147.616  -11.579 < 2e-16 ***
## siteousPrisma -406.556    149.583   -2.718  0.00657 **
## siteousSkyra -1297.356   131.679   -9.852 < 2e-16 ***
## siteUKB      -1536.755   120.485  -12.755 < 2e-16 ***
## siteUOXF     -711.377    135.975   -5.232  1.69e-07 ***
## icv          898.979      6.896  130.364 < 2e-16 ***
## ---
## Signif. codes:  0 '***' 0.001 '**' 0.01 '*' 0.05 '.' 0.1 ' ' 1
##
## Approximate significance of smooth terms:
##           edf Ref.df      F p-value
## s(age_z)   3.331  3.331 1791.515 < 2e-16 ***
## s(sleep_z) 2.771  2.771   7.336 0.000221 ***
## ---
## Signif. codes:  0 '***' 0.001 '**' 0.01 '*' 0.05 '.' 0.1 ' ' 1
##
```



```
## R-sq.(adj) = 0.555
## lmer.REML = 5.1044e+05 Scale est. = 81739 n = 31194
```

Below is the output for a model in which we control for the main effects of income and education.

```
##
## Family: gaussian
## Link function: identity
##
## Formula:
## value ~ sex + site + s(age_z, k = 10, bs = "cr") + s(sleep_z,
##     k = 5, bs = "cr") + icv + income_scaled + education_scaled
## <environment: 0x55896133bb60>
##
## Parametric coefficients:
##           Estimate Std. Error t value Pr(>|t|)
## (Intercept) 15046.075   121.464 123.873 < 2e-16 ***
## sexmale      174.729    13.455  12.986 < 2e-16 ***
## siteousAvanto -1709.996   147.605 -11.585 < 2e-16 ***
## siteousPrisma -409.784   149.538  -2.740 0.00614 **
## siteousSkyra  -1298.148   131.688  -9.858 < 2e-16 ***
## siteUKB      -1537.457   120.467 -12.763 < 2e-16 ***
## siteUOXF     -702.322   135.969  -5.165 2.42e-07 ***
## icv           896.973    6.954 128.982 < 2e-16 ***
## income_scaled  19.899    15.974  1.246 0.21288
## education_scaled 28.297    18.897  1.497 0.13429
## ---
## Signif. codes:  0 '***' 0.001 '**' 0.01 '*' 0.05 '.' 0.1 ' ' 1
##
## Approximate significance of smooth terms:
##           edf Ref.df      F p-value
## s(age_z)   3.241  3.241 1688.365 < 2e-16 ***
## s(sleep_z) 2.665  2.665   7.206 0.000326 ***
## ---
## Signif. codes:  0 '***' 0.001 '**' 0.01 '*' 0.05 '.' 0.1 ' ' 1
##
## R-sq.(adj) = 0.555
## lmer.REML = 5.1042e+05 Scale est. = 81800 n = 31194
```

We also included interaction effects between sleep duration and education and income, in another model. The output is shown below, and the interaction terms are `income_scaled:sleep_z` and `education_scaled:sleep_z`.

```
##
## Family: gaussian
## Link function: identity
##
## Formula:
## value ~ sex + site + s(age_z, k = 10, bs = "cr") + s(sleep_z,
##     k = 5, bs = "cr") + icv + income_scaled + education_scaled +
##     income_scaled:sleep_z + education_scaled:sleep_z
## <environment: 0x55896133bb60>
##
## Parametric coefficients:
##           Estimate Std. Error t value Pr(>|t|)
## (Intercept) 15045.297   121.455 123.875 < 2e-16 ***
```

```

## sexmale          174.148      13.464  12.934 < 2e-16 ***
## siteousAvanto    -1710.595     147.596 -11.590 < 2e-16 ***
## siteousPrisma    -411.496     149.542  -2.752 0.00593 **
## siteousSkyra     -1298.685     131.686  -9.862 < 2e-16 ***
## siteUKB          -1536.414     120.462 -12.754 < 2e-16 ***
## siteUOXF         -699.674     135.993  -5.145 2.69e-07 ***
## icv              896.974        6.955 128.971 < 2e-16 ***
## income_scaled    20.515        15.981   1.284 0.19926
## education_scaled 28.010        18.900   1.482 0.13834
## income_scaled:sleep_z -21.628     15.926  -1.358 0.17445
## education_scaled:sleep_z 1.352      18.344   0.074 0.94124
## ---
## Signif. codes:  0 '***' 0.001 '**' 0.01 '*' 0.05 '.' 0.1 ' ' 1
##
## Approximate significance of smooth terms:
##          edf Ref.df      F p-value
## s(age_z)  3.217  3.217 1699.202 <2e-16 ***
## s(sleep_z) 2.673  2.673   2.868  0.069 .
## ---
## Signif. codes:  0 '***' 0.001 '**' 0.01 '*' 0.05 '.' 0.1 ' ' 1
##
## R-sq.(adj) =  0.555
## lmer.REML = 5.104e+05  Scale est. = 81806      n = 31194

```

We did the same controlling for BMI. Below is the model with no covariates but only keeping data with BMI.

```

##
## Family: gaussian
## Link function: identity
##
## Formula:
## value ~ sex + site + s(age_z, k = 10, bs = "cr") + s(sleep_z,
##           k = 5, bs = "cr") + icv
## <environment: 0x5589602edd20>
##
## Parametric coefficients:
##              Estimate Std. Error t value Pr(>|t|)
## (Intercept) 13635.869    85.714 159.085 < 2e-16 ***
## sexmale     163.769     13.030  12.569 < 2e-16 ***
## siteousPrisma 822.343    112.901   7.284 3.32e-13 ***
## siteousSkyra 232.174     68.558   3.387 0.000709 ***
## siteUCAM     814.823     90.175   9.036 < 2e-16 ***
## siteUKB     -67.346     86.384  -0.780 0.435624
## siteUmU     -233.709    101.216  -2.309 0.020949 *
## icv         909.969      6.716 135.495 < 2e-16 ***
## ---
## Signif. codes:  0 '***' 0.001 '**' 0.01 '*' 0.05 '.' 0.1 ' ' 1
##
## Approximate significance of smooth terms:
##          edf Ref.df      F p-value
## s(age_z)  5.651  5.651 1366.485 < 2e-16 ***
## s(sleep_z) 2.589  2.589   6.966 0.000428 ***
## ---
## Signif. codes:  0 '***' 0.001 '**' 0.01 '*' 0.05 '.' 0.1 ' ' 1
##

```

```
## R-sq.(adj) = 0.582
## lmer.REML = 5.4679e+05 Scale est. = 75474 n = 33449
```

Below is the model output with main effect.

```
##
## Family: gaussian
## Link function: identity
##
## Formula:
## value ~ sex + site + s(age_z, k = 10, bs = "cr") + s(sleep_z,
## k = 5, bs = "cr") + icv + bmi
## <environment: 0x5589602edd20>
##
## Parametric coefficients:
## Estimate Std. Error t value Pr(>|t|)
## (Intercept) 13614.2523 91.4995 148.790 < 2e-16 ***
## sexmale 163.0917 13.0687 12.480 < 2e-16 ***
## siteousPrisma 821.5215 112.9095 7.276 3.52e-13 ***
## siteousSkyra 232.0673 68.5592 3.385 0.000713 ***
## siteUCAM 814.3570 90.1799 9.030 < 2e-16 ***
## siteUKB -67.9988 86.3937 -0.787 0.431240
## siteUmU -234.5920 101.2282 -2.317 0.020485 *
## icv 909.8307 6.7189 135.414 < 2e-16 ***
## bmi 0.8566 1.2711 0.674 0.500377
## ---
## Signif. codes: 0 '***' 0.001 '**' 0.01 '*' 0.05 '.' 0.1 ' ' 1
##
## Approximate significance of smooth terms:
## edf Ref.df F p-value
## s(age_z) 5.656 5.656 1365.113 < 2e-16 ***
## s(sleep_z) 2.617 2.617 6.669 0.000438 ***
## ---
## Signif. codes: 0 '***' 0.001 '**' 0.01 '*' 0.05 '.' 0.1 ' ' 1
##
## R-sq.(adj) = 0.582
## lmer.REML = 5.4678e+05 Scale est. = 75476 n = 33449
```

Next is the model with BMI-sleep interaction.

```
##
## Family: gaussian
## Link function: identity
##
## Formula:
## value ~ sex + site + s(age_z, k = 10, bs = "cr") + s(sleep_z,
## k = 5, bs = "cr") + icv + bmi + bmi:sleep_z
## <environment: 0x5589602edd20>
##
## Parametric coefficients:
## Estimate Std. Error t value Pr(>|t|)
## (Intercept) 13610.616 91.537 148.690 < 2e-16 ***
## sexmale 163.160 13.069 12.485 < 2e-16 ***
## siteousPrisma 821.591 112.907 7.277 3.5e-13 ***
## siteousSkyra 232.435 68.558 3.390 0.000699 ***
## siteUCAM 815.697 90.183 9.045 < 2e-16 ***
```

```

## siteUKB      -66.647      86.394  -0.771  0.440462
## siteUmU     -233.461     101.229  -2.306  0.021101 *
## icv         909.910       6.719  135.425 < 2e-16 ***
## bmi         0.912        1.272   0.717  0.473281
## bmi:sleep_z  1.640        1.206   1.360  0.173772
## ---
## Signif. codes:  0 '***' 0.001 '**' 0.01 '*' 0.05 '.' 0.1 ' ' 1
##
## Approximate significance of smooth terms:
##          edf Ref.df      F p-value
## s(age_z)  5.646  5.646 1368.029 <2e-16 ***
## s(sleep_z) 2.565  2.565   3.456   0.02 *
## ---
## Signif. codes:  0 '***' 0.001 '**' 0.01 '*' 0.05 '.' 0.1 ' ' 1
##
## R-sq.(adj) =  0.582
## lmer.REML = 5.4678e+05  Scale est. = 75472      n = 33449

```

We did the same controlling for depression. Below is the model with no covariates but only keeping data with depression.

```

##
## Family: gaussian
## Link function: identity
##
## Formula:
## value ~ sex + site + s(age_z, k = 10, bs = "cr") + s(sleep_z,
##           k = 5, bs = "cr") + icv
## <environment: 0x55895e4d75d0>
##
## Parametric coefficients:
##              Estimate Std. Error t value Pr(>|t|)
## (Intercept)  14864.399    61.807  240.498 < 2e-16 ***
## sexmale      165.624     13.056   12.686 < 2e-16 ***
## siteousAvanto -1109.929    135.769  -8.175 3.06e-16 ***
## siteousPrisma -324.664    119.706  -2.712 0.00669 **
## siteousSkyra  -755.799     93.726  -8.064 7.64e-16 ***
## siteUCAM     -448.938     84.864  -5.290 1.23e-07 ***
## siteUKB     -1311.541     61.119 -21.459 < 2e-16 ***
## siteUmU     -1469.083     82.941 -17.712 < 2e-16 ***
## icv         902.973       6.719  134.387 < 2e-16 ***
## ---
## Signif. codes:  0 '***' 0.001 '**' 0.01 '*' 0.05 '.' 0.1 ' ' 1
##
## Approximate significance of smooth terms:
##          edf Ref.df      F p-value
## s(age_z)  7.099  7.099 951.524 < 2e-16 ***
## s(sleep_z) 2.594  2.594  7.873 0.000155 ***
## ---
## Signif. codes:  0 '***' 0.001 '**' 0.01 '*' 0.05 '.' 0.1 ' ' 1
##
## R-sq.(adj) =  0.57
## lmer.REML = 5.4493e+05  Scale est. = 72753      n = 33361

```

Below is the model output with main effect.

```

##
## Family: gaussian
## Link function: identity
##
## Formula:
## value ~ sex + site + s(age_z, k = 10, bs = "cr") + s(sleep_z,
##     k = 5, bs = "cr") + icv + depression
## <environment: 0x55895e4d75d0>
##
## Parametric coefficients:
##           Estimate Std. Error t value Pr(>|t|)
## (Intercept)  14886.219    62.064  239.853 < 2e-16 ***
## sexmale      163.360     13.067   12.502 < 2e-16 ***
## siteousAvanto -1098.740   135.767  -8.093 6.02e-16 ***
## siteousPrisma -314.774   119.712  -2.629 0.008557 **
## siteousSkyra  -743.116    93.769  -7.925 2.35e-15 ***
## siteUCAM     -444.007    84.860  -5.232 1.68e-07 ***
## siteUKB     -1320.492    61.155 -21.593 < 2e-16 ***
## siteUmU     -1402.974    84.707 -16.563 < 2e-16 ***
## icv          903.327     6.718  134.464 < 2e-16 ***
## depression   -178.587    46.642  -3.829 0.000129 ***
## ---
## Signif. codes:  0 '***' 0.001 '**' 0.01 '*' 0.05 '.' 0.1 ' ' 1
##
## Approximate significance of smooth terms:
##           edf Ref.df      F p-value
## s(age_z)   7.102  7.102 945.970 < 2e-16 ***
## s(sleep_z) 2.347  2.347  8.394 0.00012 ***
## ---
## Signif. codes:  0 '***' 0.001 '**' 0.01 '*' 0.05 '.' 0.1 ' ' 1
##
## R-sq.(adj) =  0.57
## lmer.REML = 5.4491e+05  Scale est. = 72703      n = 33361

```

Next is the model with depression-sleep interaction.

```

##
## Family: gaussian
## Link function: identity
##
## Formula:
## value ~ sex + site + s(age_z, k = 10, bs = "cr") + s(sleep_z,
##     k = 5, bs = "cr") + icv + depression + depression:sleep_z
## <environment: 0x55895e4d75d0>
##
## Parametric coefficients:
##           Estimate Std. Error t value Pr(>|t|)
## (Intercept)  14886.264    62.065  239.851 < 2e-16 ***
## sexmale      163.187     13.069   12.486 < 2e-16 ***
## siteousAvanto -1099.863   135.774  -8.101 5.65e-16 ***
## siteousPrisma -315.911   119.720  -2.639 0.008325 **
## siteousSkyra  -744.221    93.779  -7.936 2.15e-15 ***
## siteUCAM     -445.164    84.875  -5.245 1.57e-07 ***
## siteUKB     -1320.498    61.155 -21.592 < 2e-16 ***
## siteUmU     -1394.521    85.437 -16.322 < 2e-16 ***

```

```

## icv                903.328      6.718 134.460 < 2e-16 ***
## depression         -180.478     46.739  -3.861 0.000113 ***
## depression:sleep_z -26.174     34.302  -0.763 0.445446
## ---
## Signif. codes:  0 '***' 0.001 '**' 0.01 '*' 0.05 '.' 0.1 ' ' 1
##
## Approximate significance of smooth terms:
##           edf Ref.df      F p-value
## s(age_z)  7.091  7.091 947.297 <2e-16 ***
## s(sleep_z) 2.396  2.396  5.078  0.0031 **
## ---
## Signif. codes:  0 '***' 0.001 '**' 0.01 '*' 0.05 '.' 0.1 ' ' 1
##
## R-sq.(adj) =  0.57
## lmer.REML = 5.449e+05  Scale est. = 72702      n = 33361

```

The plot below shows the sleep-volume curve for the original model and for the model with main effects of SES.

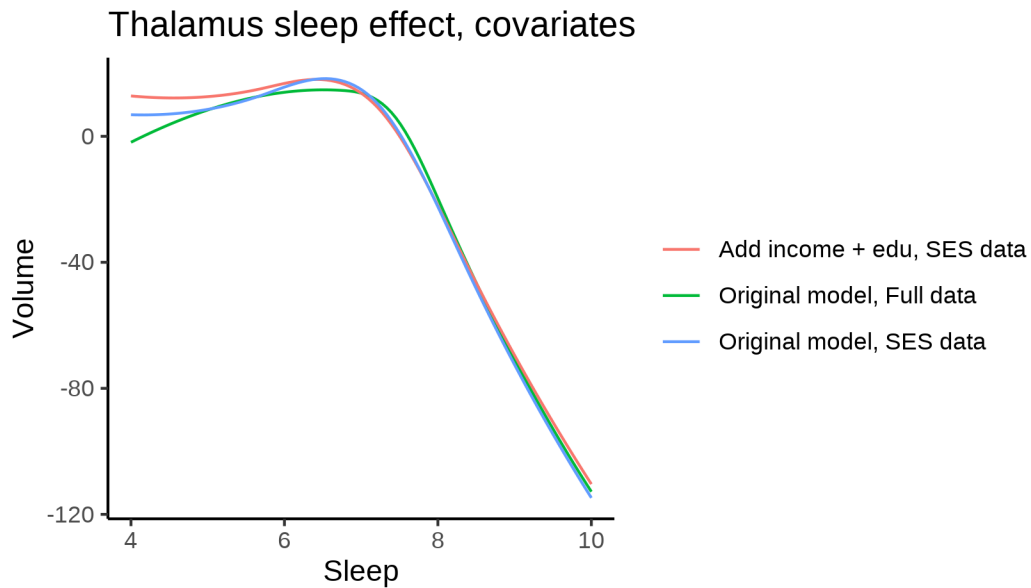

The plot below shows the sleep-volume curve for the original model and for the model with main effects of BMI.

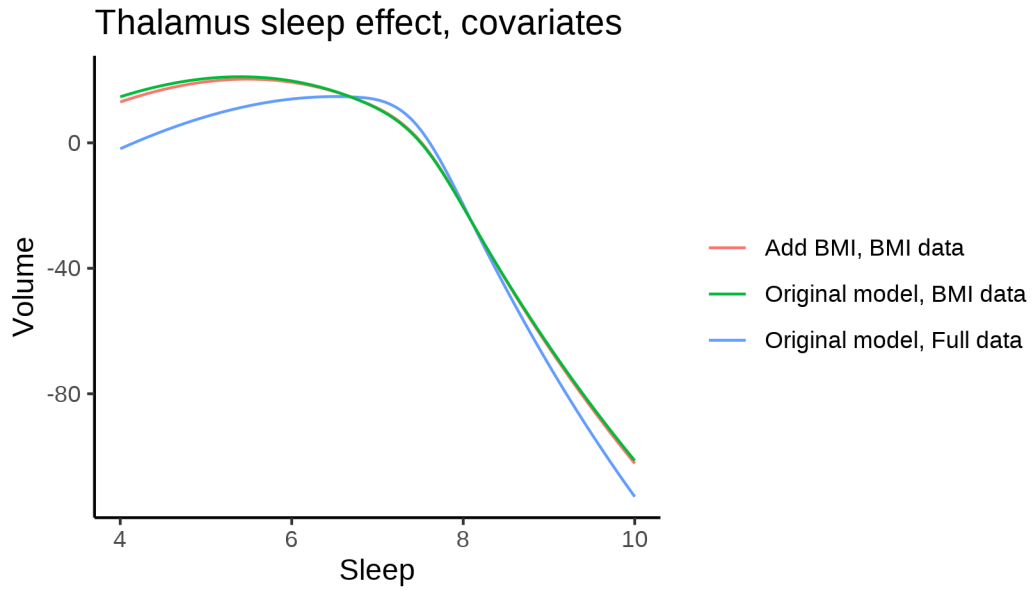

The plot below shows the sleep-volume curve for the original model and for the model with main effects of depression.

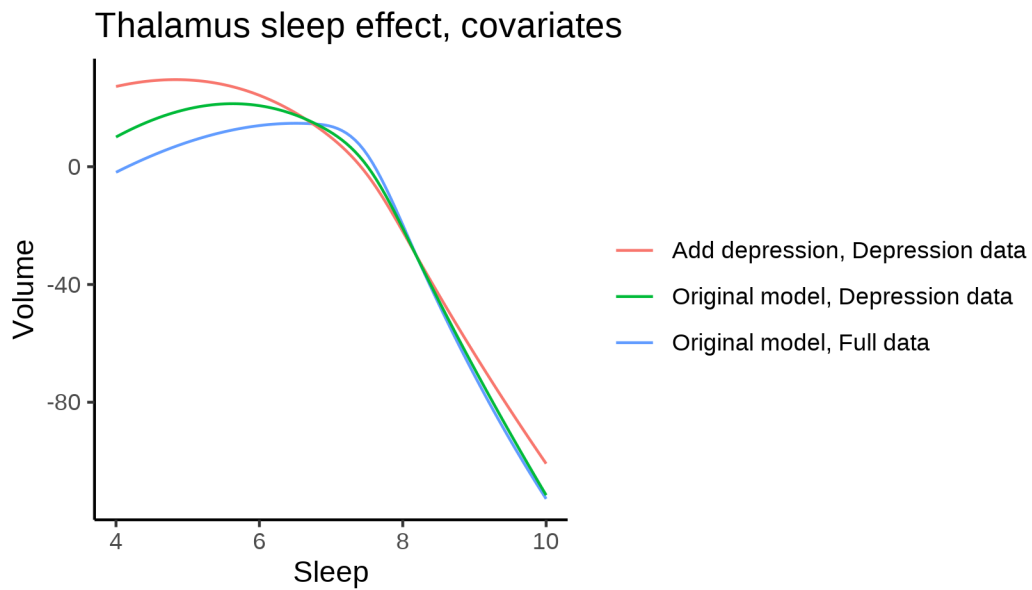

## Models Not controlling for ICV

### Model outputs

Model without sleep term

```
##
## Family: gaussian
## Link function: identity
##
## Formula:
```

```

## value ~ sex + site + s(age_z, k = 10, bs = "cr")
## <environment: 0x558961ed7108>
##
## Parametric coefficients:
##           Estimate Std. Error t value Pr(>|t|)
## (Intercept) 12928.56    63.39 203.961 < 2e-16 ***
## sexmale     1196.94    10.97 109.157 < 2e-16 ***
## siteMPIB    176.45    81.98   2.152 0.031376 *
## siteousAvanto 671.85    65.40 10.273 < 2e-16 ***
## siteousPrisma 1238.89   111.09 11.152 < 2e-16 ***
## siteousSkyra 449.19    62.82   7.151 8.76e-13 ***
## siteUB      759.35   196.21   3.870 0.000109 ***
## siteUCAM    1074.91    71.41 15.052 < 2e-16 ***
## siteUKB     192.05    65.07   2.951 0.003164 **
## siteUmU     -395.22    92.54  -4.271 1.95e-05 ***
## siteUOXF    669.75    77.74   8.615 < 2e-16 ***
## ---
## Signif. codes:  0 '***' 0.001 '**' 0.01 '*' 0.05 '.' 0.1 ' ' 1
##
## Approximate significance of smooth terms:
##           edf Ref.df   F p-value
## s(age_z) 6.128 6.128 1681 <2e-16 ***
## ---
## Signif. codes:  0 '***' 0.001 '**' 0.01 '*' 0.05 '.' 0.1 ' ' 1
##
## R-sq.(adj) = 0.344
## lmer.REML = 8.6151e+05 Scale est. = 82533    n = 51279

```

Model with only main effects of age and sleep

```

##
## Family: gaussian
## Link function: identity
##
## Formula:
## value ~ sex + site + s(age_z, k = 10, bs = "cr") + s(sleep_z,
##           k = 5, bs = "cr")
## <environment: 0x558961ed7108>
##
## Parametric coefficients:
##           Estimate Std. Error t value Pr(>|t|)
## (Intercept) 12942.40    63.41 204.092 < 2e-16 ***
## sexmale     1194.24    10.96 108.924 < 2e-16 ***
## siteMPIB    176.78    81.96   2.157 0.03102 *
## siteousAvanto 661.36    65.38 10.115 < 2e-16 ***
## siteousPrisma 1231.13   111.04 11.088 < 2e-16 ***
## siteousSkyra 437.87    62.80   6.973 3.15e-12 ***
## siteUB      768.98   196.05   3.922 8.78e-05 ***
## siteUCAM    1074.88    71.37 15.060 < 2e-16 ***
## siteUKB     178.74    65.09   2.746 0.00604 **
## siteUmU     -398.28    92.69  -4.297 1.73e-05 ***
## siteUOXF    664.22    77.69   8.550 < 2e-16 ***
## ---
## Signif. codes:  0 '***' 0.001 '**' 0.01 '*' 0.05 '.' 0.1 ' ' 1
##

```



```

## Approximate significance of smooth terms:
##           edf Ref.df      F p-value
## s(age_z)  6.112  6.112 1664.17 <2e-16 ***
## s(sleep_z) 3.701  3.701  17.38 <2e-16 ***
## ---
## Signif. codes:  0 '***' 0.001 '**' 0.01 '*' 0.05 '.' 0.1 ' ' 1
##
## R-sq.(adj) =  0.345
## lmer.REML = 8.6145e+05  Scale est. = 82602      n = 51279

Model with full interaction between age and sleep

##
## Family: gaussian
## Link function: identity
##
## Formula:
## value ~ sex + site + t2(age_z, sleep_z, k = c(10, 4), bs = "cr")
## <environment: 0x558961ed7108>
##
## Parametric coefficients:
##           Estimate Std. Error t value Pr(>|t|)
## (Intercept) 12955.15     63.03 205.552 < 2e-16 ***
## sexmale      1195.58     10.99 108.786 < 2e-16 ***
## siteMPIB      160.13     82.09   1.951 0.051093 .
## siteousAvanto  653.12     65.55   9.964 < 2e-16 ***
## siteousPrisma 1222.37    111.25  10.988 < 2e-16 ***
## siteousSkyra  429.29     62.99   6.816 9.50e-12 ***
## siteUB        743.40    196.03   3.792 0.000149 ***
## siteUCAM     1059.31     71.47  14.822 < 2e-16 ***
## siteUKB       165.12     64.67   2.553 0.010668 *
## siteUmU       -413.16     92.65  -4.459 8.23e-06 ***
## siteUOXF       644.14     77.47   8.315 < 2e-16 ***
## ---
## Signif. codes:  0 '***' 0.001 '**' 0.01 '*' 0.05 '.' 0.1 ' ' 1
##
## Approximate significance of smooth terms:
##           edf Ref.df      F p-value
## t2(age_z,sleep_z) 12.58  12.58 53.56 <2e-16 ***
## ---
## Signif. codes:  0 '***' 0.001 '**' 0.01 '*' 0.05 '.' 0.1 ' ' 1
##
## R-sq.(adj) =  0.345
## lmer.REML = 8.6148e+05  Scale est. = 82612      n = 51279

```

## Model comparison

`mod_no_sleep` refers to model without sleep term, `mod_no_interaction` refers to model with only main effect of sleep, and `mod_full` refers to model with a full interaction between age and sleep. This is a nested model comparison, and the p-value at a given line refers to comparing the model at the line to the model on the line above. Hence, significance implies that the more complicated model is supported on statistical grounds.

To be even more specific, the p-value on the second row tests whether there is an association between sleep and volume. The p-value on the third row tests whether this association depends on age.

```

## Data: NULL
## Models:
## ml$mod_no_sleep$mer: NULL
## ml$mod_no_interaction$mer: NULL
## ml$mod_full$mer: NULL
##
##          npar    AIC    BIC logLik deviance  Chisq Df Pr(>Chisq)
## ml$mod_no_sleep$mer      15 861538 861671 -430754    861508
## ml$mod_no_interaction$mer 17 861484 861635 -430725    861450 57.921  2 2.647e-13 ***
## ml$mod_full$mer          19 861514 861682 -430738    861476  0.000  2          1
## ---
## Signif. codes:  0 '***' 0.001 '**' 0.01 '*' 0.05 '.' 0.1 ' ' 1

```

We chose the model based on the likelihood ratio test with 5 % significance level, which was `mod_no_interaction`.

### Lifespan brain trajectory

The trajectory shown is from the chosen model `mod_no_interaction_no_icv`.

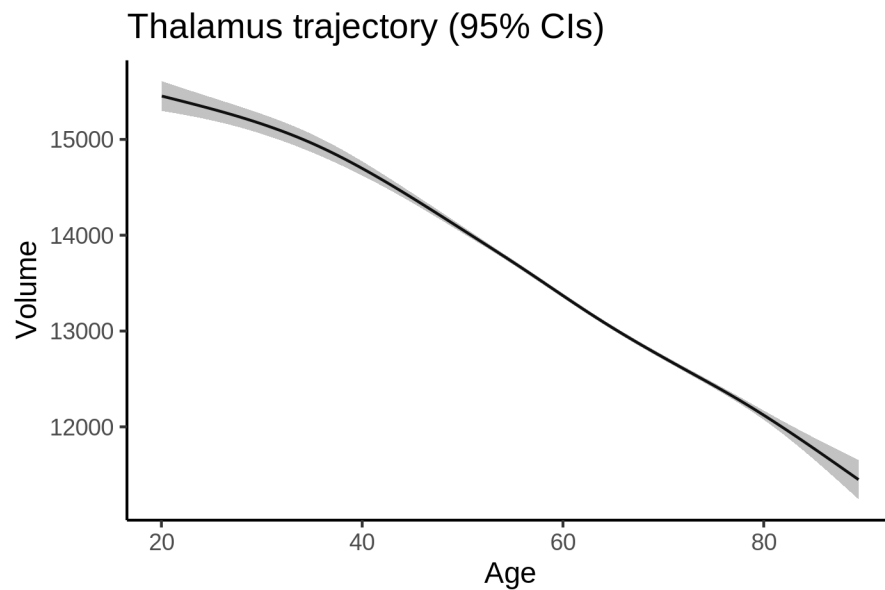

### Effect of sleep

The chosen model only included the main effect of sleep, and hence the effect does not vary with age. The black dot shows the average sleep duration across all ages in the sample.

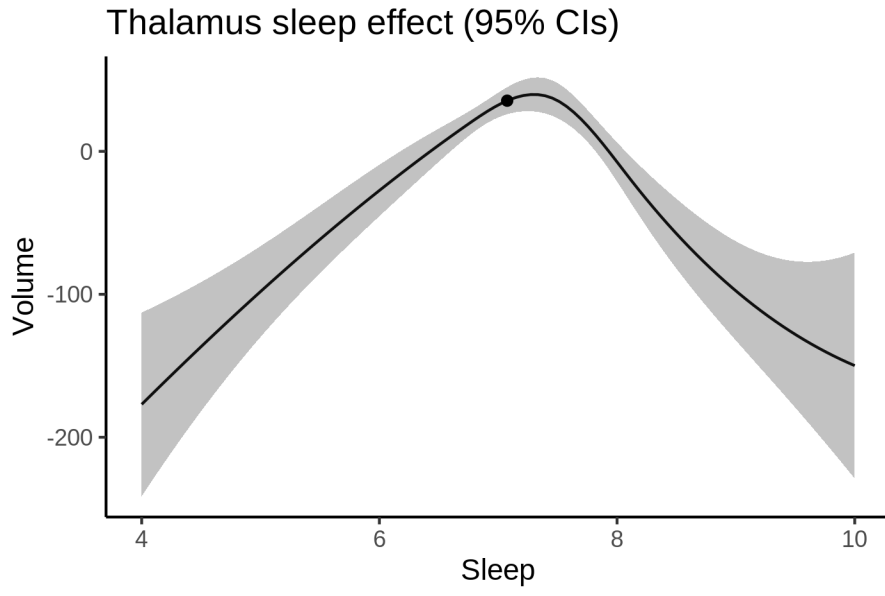

We also show the full interaction model for completeness, although it was not selected.

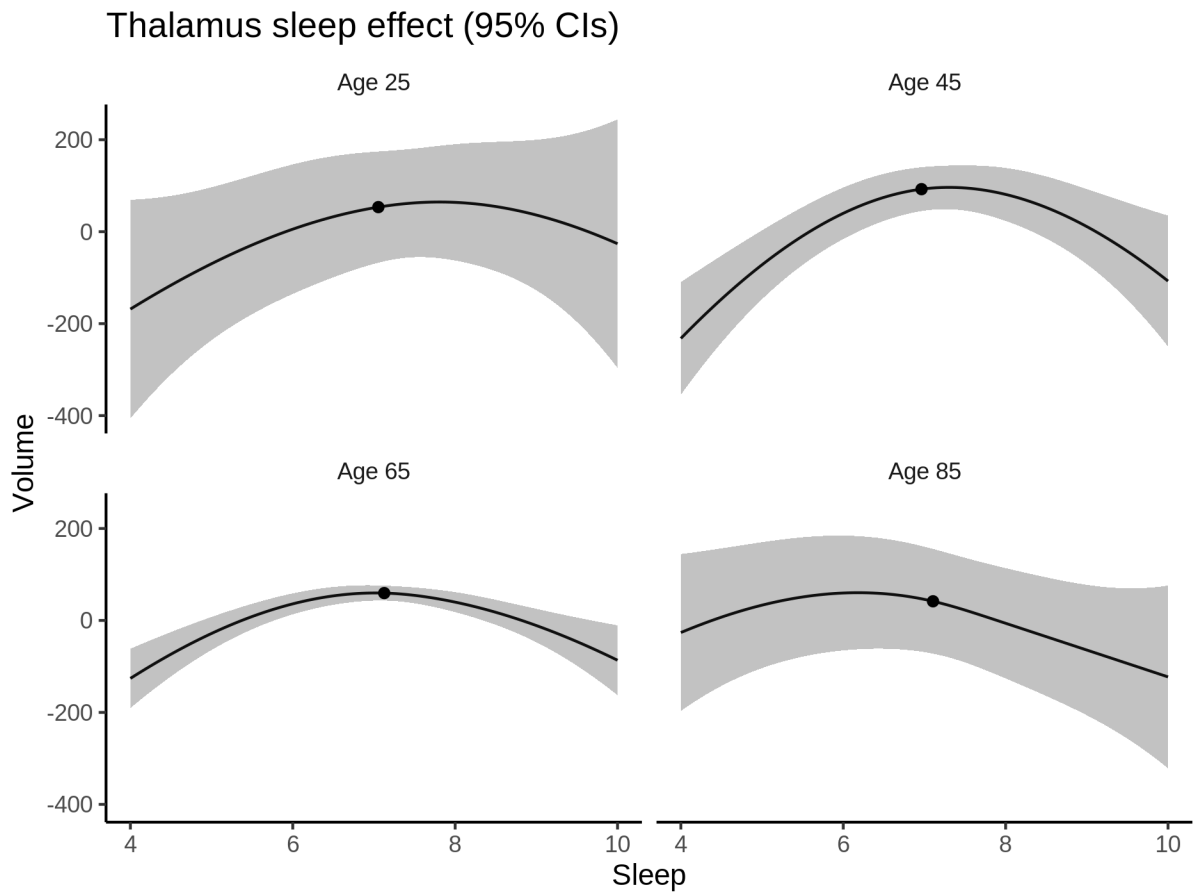

### Deviation from sleep associated with maximal volume

Model with only main effect of sleep was chosen, so we show it for all ages at once. Maximum volume is attained at 7.3 hours of sleep. The percentage values in the plot are calculated as follows: The maximum at 100 % refers to a person at an arbitrary age with a sleep duration associated with maximum volume. For a female, this volume is 13655 and for a male it is 14849. The other percentage values show how large the expected volume is for someone with other sleep durations. For example, 99 % implies a 1 % reduction.

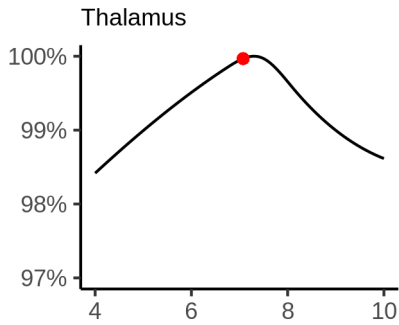

### Comparison of mean sleep and sleep associated with maximum volume

A 95 % confidence interval for the sleep associated with maximum volume is [7.21, 7.39].

The plot below compares average sleep to the sleep associated with maximum volume.

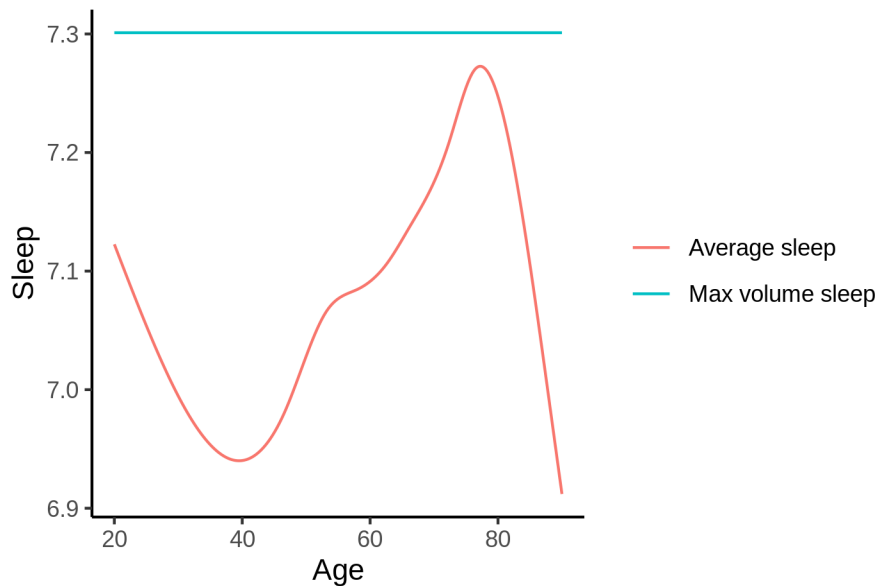

The next plot shows the difference between average sleep and sleep associated with maximum volume. The shaded region is a 95 % confidence interval.

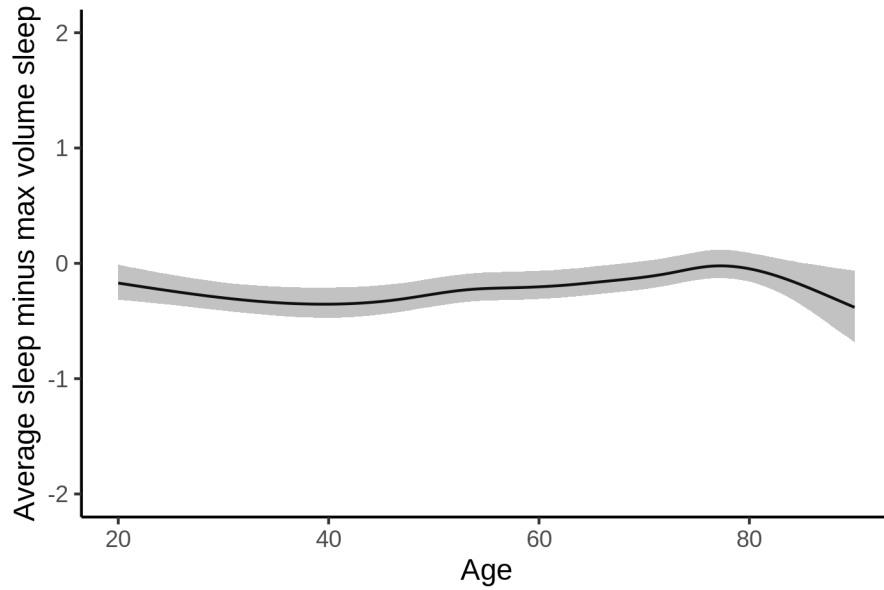

The next plot shows the probability that the sleep duration associated with maximum volume is longer than the average sleep duration, as a function of age. Probability below .05 can be interpreted as evidence that the sleep associated with maximum volume is shorter than the mean sleep, and probability above .95 can be interpreted the opposite way.

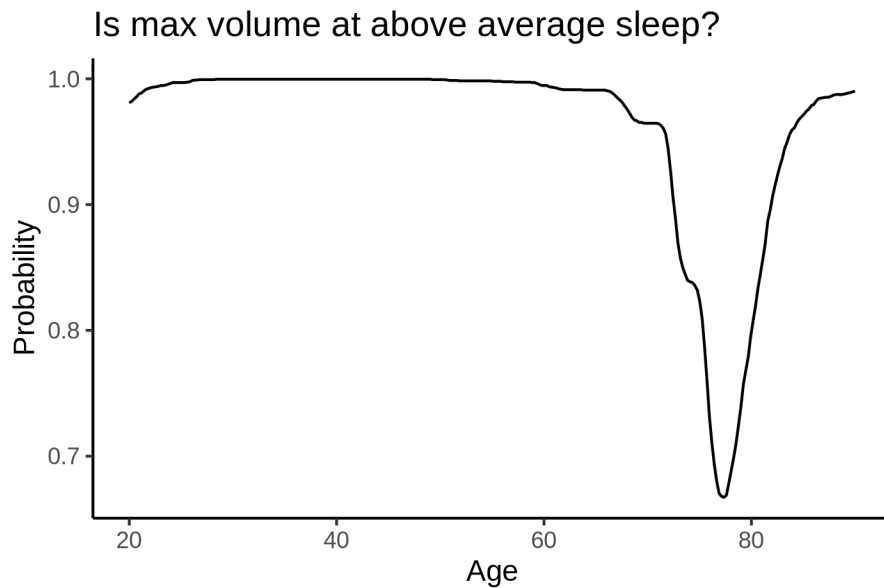

## TotalGrayVol

### Descriptive statistics

| Study | Observations | Unique IDs | Mean age | Age range |
|-------|--------------|------------|----------|-----------|
| HCP   | 974          | 974        | 28.8     | 22 - 37   |
| MPIB  | 677          | 391        | 63.1     | 24 - 83   |

| Study | Observations | Unique IDs | Mean age | Age range |
|-------|--------------|------------|----------|-----------|
| UB    | 113          | 39         | 70.9     | 64 - 81   |
| UCAM  | 884          | 632        | 55.1     | 20 - 88   |
| UiO   | 1475         | 803        | 49.4     | 20 - 89   |
| UKB   | 45978        | 43135      | 64.5     | 45 - 83   |
| UmU   | 412          | 279        | 62.2     | 25 - 85   |
| UOXF  | 769          | 769        | 69.8     | 60 - 85   |

## Spaghetti plot

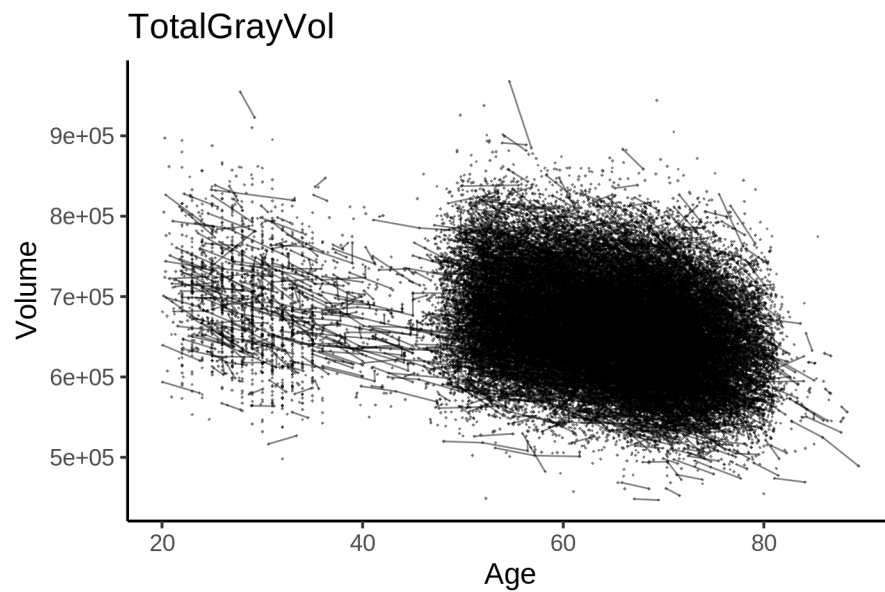

## Models Controlling for ICV

### Model outputs

Model without sleep term

```
##
## Family: gaussian
## Link function: identity
##
## Formula:
## value ~ sex + site + icv + s(age_z, k = 10, bs = "cr")
## <environment: 0x5589627443f0>
##
## Parametric coefficients:
##              Estimate Std. Error t value Pr(>|t|)
## (Intercept) 606887.8    1672.2  362.919 < 2e-16 ***
## sexmale      15934.2     334.6   47.617 < 2e-16 ***
## siteMPIB     56130.9    2100.4  26.724 < 2e-16 ***
## siteousAvanto -4998.6    1744.7  -2.865  0.00417 **
## siteousPrisma 31174.8    2923.3  10.664 < 2e-16 ***
## siteousSkyra 20133.2    1605.4  12.541 < 2e-16 ***
```

```

## siteUB          13390.5      4860.0   2.755  0.00587 **
## siteUCAM        14878.3      1827.3   8.142  3.97e-16 ***
## siteUKB         51681.0      1716.1  30.115 < 2e-16 ***
## siteUmU         26393.1      2357.3  11.196 < 2e-16 ***
## siteUOXF        10142.0      2019.0   5.023  5.10e-07 ***
## icv             45504.0       168.5  270.132 < 2e-16 ***
## ---
## Signif. codes:  0 '***' 0.001 '**' 0.01 '*' 0.05 '.' 0.1 ' ' 1
##
## Approximate significance of smooth terms:
##           edf Ref.df      F p-value
## s(age_z)  7.941  7.941 1797 <2e-16 ***
## ---
## Signif. codes:  0 '***' 0.001 '**' 0.01 '*' 0.05 '.' 0.1 ' ' 1
##
## R-sq.(adj) =  0.766
## lmer.REML = 1.1949e+06  Scale est. = 1.0496e+08  n = 51282

Model with only main effects of age and sleep

##
## Family: gaussian
## Link function: identity
##
## Formula:
## value ~ sex + site + icv + s(age_z, k = 10, bs = "cr") + s(sleep_z,
##           k = 5, bs = "cr")
## <environment: 0x5589627443f0>
##
## Parametric coefficients:
##           Estimate Std. Error t value Pr(>|t|)
## (Intercept) 607086.4    1672.6 362.958 < 2e-16 ***
## sexmale     15923.5     334.3  47.626 < 2e-16 ***
## siteMPIB    56214.6    2099.9  26.771 < 2e-16 ***
## siteousAvanto -5206.9    1744.0  -2.986  0.00283 **
## siteousPrisma 31043.8    2920.9  10.628 < 2e-16 ***
## siteousSkyra 19884.2    1604.7  12.392 < 2e-16 ***
## siteUB      13687.7    4854.9   2.819  0.00481 **
## siteUCAM    14947.8    1826.0   8.186  2.76e-16 ***
## siteUKB     51475.6    1716.7  29.986 < 2e-16 ***
## siteUmU     26623.9    2360.7  11.278 < 2e-16 ***
## siteUOXF    10040.2    2017.5   4.977  6.50e-07 ***
## icv         45448.5     168.5  269.750 < 2e-16 ***
## ---
## Signif. codes:  0 '***' 0.001 '**' 0.01 '*' 0.05 '.' 0.1 ' ' 1
##
## Approximate significance of smooth terms:
##           edf Ref.df      F p-value
## s(age_z)   7.937  7.937 1776.07 <2e-16 ***
## s(sleep_z) 3.674  3.674   24.31 <2e-16 ***
## ---
## Signif. codes:  0 '***' 0.001 '**' 0.01 '*' 0.05 '.' 0.1 ' ' 1
##
## R-sq.(adj) =  0.767
## lmer.REML = 1.1948e+06  Scale est. = 1.0499e+08  n = 51282

```

Model with full interaction between age and sleep

```
##
## Family: gaussian
## Link function: identity
##
## Formula:
## value ~ sex + site + icv + t2(age_z, sleep_z, k = c(10, 4), bs = "cr")
## <environment: 0x5589627443f0>
##
## Parametric coefficients:
##           Estimate Std. Error t value Pr(>|t|)
## (Intercept) 607490.4    1680.2 361.557 < 2e-16 ***
## sexmale      15949.1     335.1  47.595 < 2e-16 ***
## siteMPIB     55703.9    2112.6  26.367 < 2e-16 ***
## siteousAvanto -5575.6    1754.5  -3.178  0.00148 **
## siteousPrisma 30633.9    2928.1  10.462 < 2e-16 ***
## siteousSkyra 19532.4    1616.7  12.081 < 2e-16 ***
## siteUB       12972.0    4859.0   2.670  0.00759 **
## siteUCAM     14388.3    1838.1   7.828 5.06e-15 ***
## siteUKB      51055.8    1724.3  29.610 < 2e-16 ***
## siteUmU      26177.1    2370.2  11.044 < 2e-16 ***
## siteUOXF     9469.2    2026.3   4.673 2.97e-06 ***
## icv          45452.0     168.5 269.770 < 2e-16 ***
## ---
## Signif. codes:  0 '***' 0.001 '**' 0.01 '*' 0.05 '.' 0.1 ' ' 1
##
## Approximate significance of smooth terms:
##           edf Ref.df    F p-value
## t2(age_z,sleep_z) 17.59  17.59 28.11 <2e-16 ***
## ---
## Signif. codes:  0 '***' 0.001 '**' 0.01 '*' 0.05 '.' 0.1 ' ' 1
##
## R-sq.(adj) =  0.767
## lmer.REML = 1.1948e+06  Scale est. = 1.05e+08  n = 51282
```

## Model comparison

`mod_no_sleep` refers to model without sleep term, `mod_no_interaction` refers to model with only main effect of sleep, and `mod_full` refers to model with a full interaction between age and sleep. This is a nested model comparison, and the p-value at a given line refers to comparing the model at the line to the model on the line above. Hence, significance implies that the more complicated model is supported on statistical grounds.

To be even more specific, the p-value on the second row tests whether there is an association between sleep and volume. The p-value on the third row tests whether this association depends on age.

```
## Data: NULL
## Models:
## ml$mod_no_sleep$mer: NULL
## ml$mod_no_interaction$mer: NULL
## ml$mod_full$mer: NULL
##           npar      AIC      BIC logLik deviance Chisq Df Pr(>Chisq)
## ml$mod_no_sleep$mer      16 1194944 1195085 -597456  1194912
## ml$mod_no_interaction$mer  18 1194866 1195025 -597415  1194830 81.882  2 <2e-16 ***
```



```
## ml$mod_full$mer          20 1194885 1195061 -597422 1194845 0.000 2      1
## ---
## Signif. codes:  0 '***' 0.001 '**' 0.01 '*' 0.05 '.' 0.1 ' ' 1
```

We chose the model based on the likelihood ratio test with 5 % significance level, which was `mod_no_interaction`.

### Lifespan brain trajectory

The trajectory shown is from the chosen model `mod_no_interaction`.

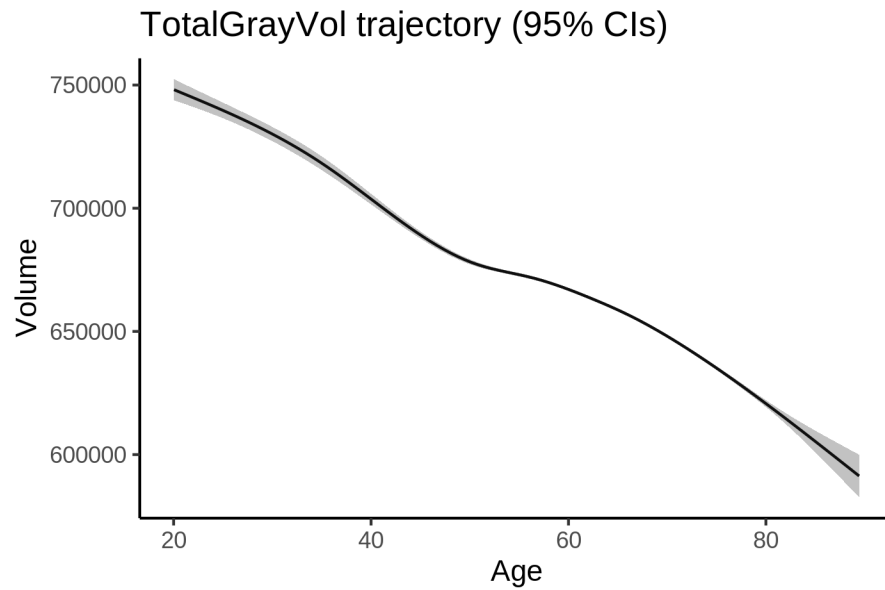

### Effect of sleep

The chosen model only included the main effect of sleep, and hence the effect does not vary with age. The black dot shows the average sleep duration across all ages in the sample.

TotalGrayVol sleep effect (95% CIs)

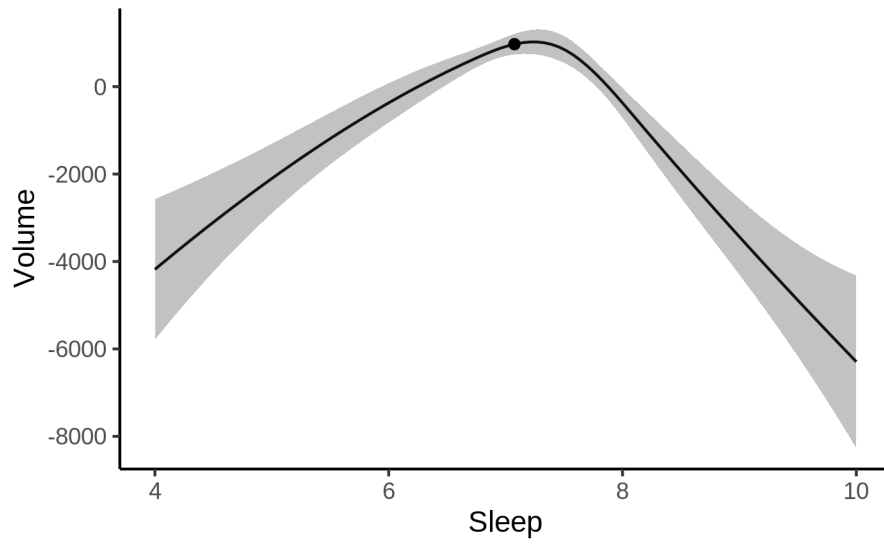

We also show the full interaction model for completeness, although it was not selected.

TotalGrayVol sleep effect (95% CIs)

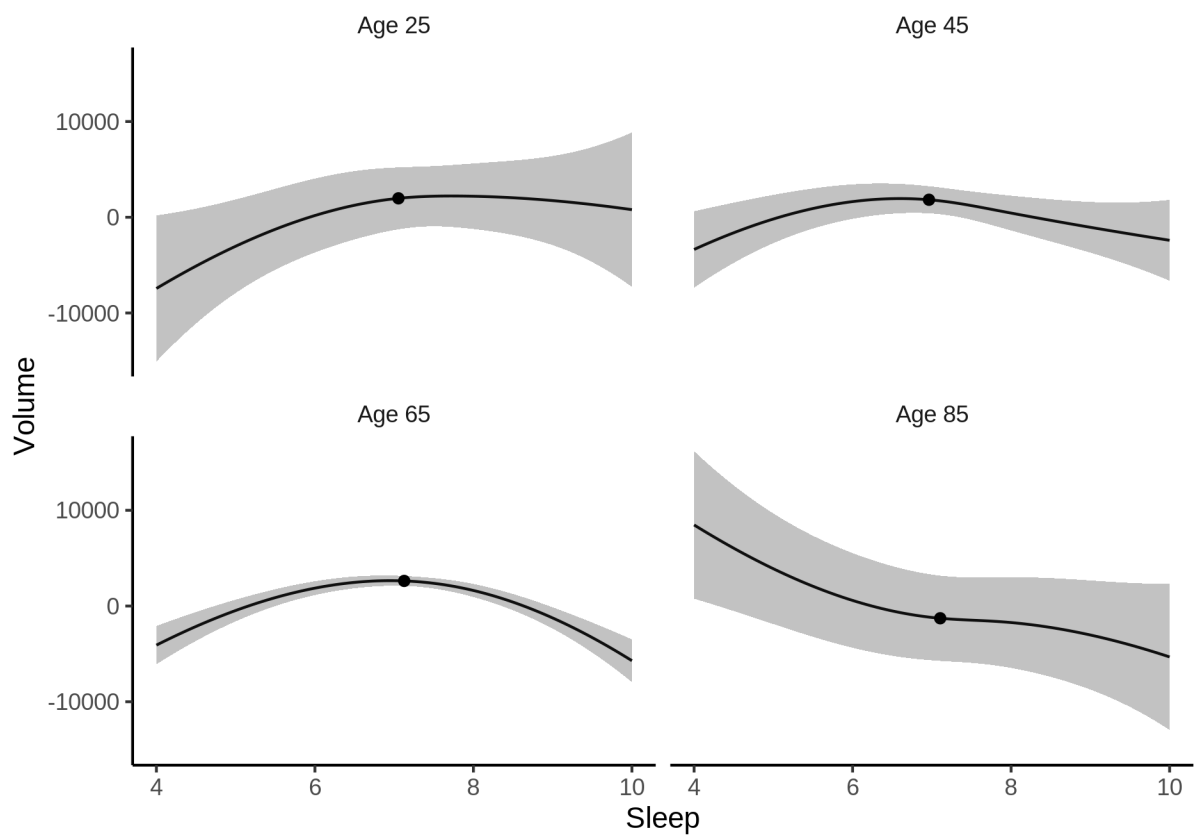

### Deviation from sleep associated with maximal volume

Model with only main effect of sleep was chosen, so we show it for all ages at once. Maximum volume is attained at 7.2 hours of sleep. The percentage values in the plot are calculated as follows: The maximum at 100 % refers to a person at an arbitrary age with a sleep duration associated with maximum volume. For a female, this volume is 674017 and for a male it is 689940. The other percentage values show how large the expected volume is for someone with other sleep durations. For example, 99 % implies a 1 % reduction.

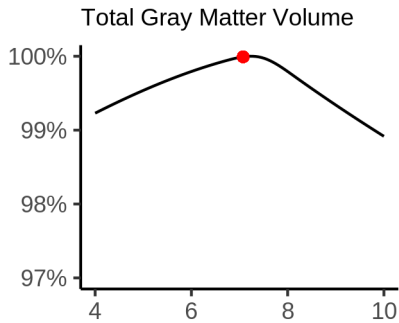

### Comparison of mean sleep and sleep associated with maximum volume

A 95 % confidence interval for the sleep associated with maximum volume is [7.09, 7.33].

The plot below compares average sleep to the sleep associated with maximum volume.

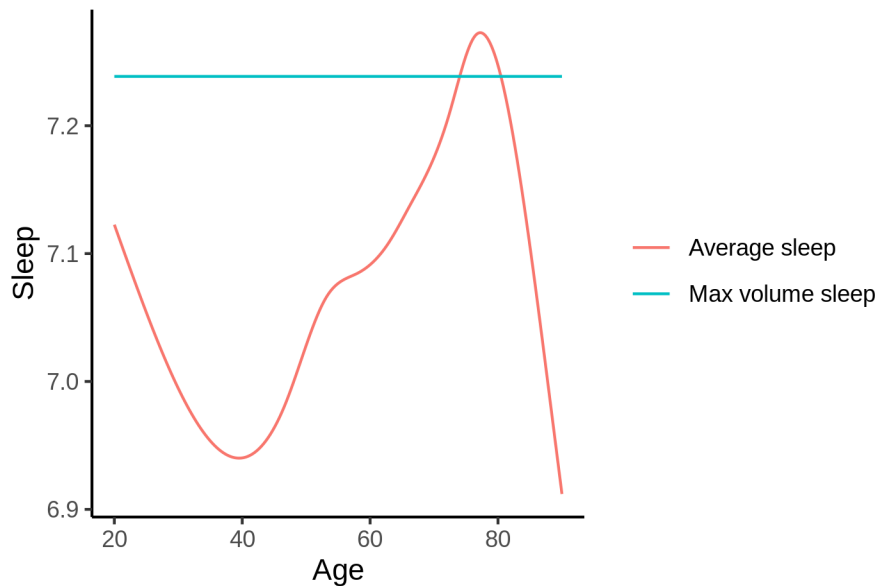

The next plot shows the difference between average sleep and sleep associated with maximum volume. The shaded region is a 95 % confidence interval.

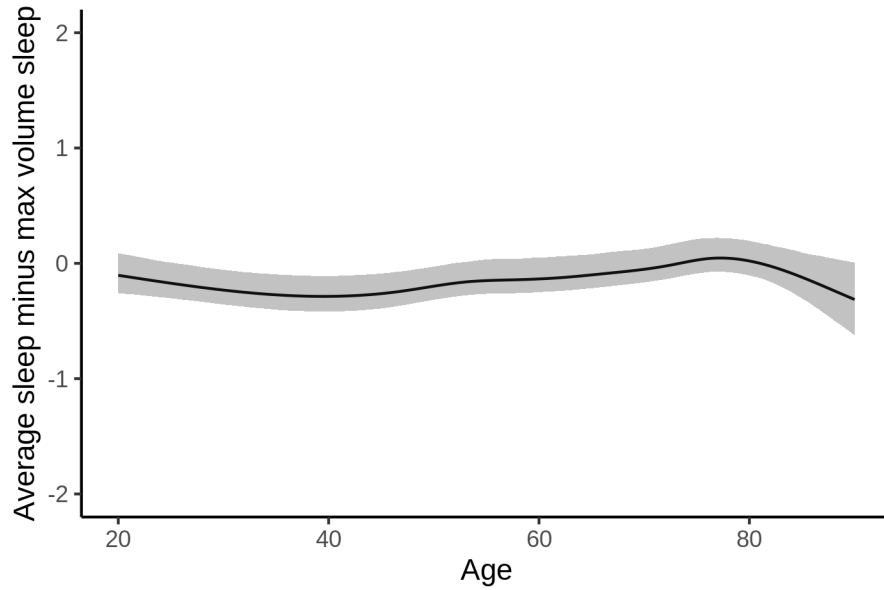

The next plot shows the probability that the sleep duration associated with maximum volume is longer than the average sleep duration, as a function of age. Probability below .05 can be interpreted as evidence that the sleep associated with maximum volume is shorter than the mean sleep, and probability above .95 can be interpreted the opposite way.

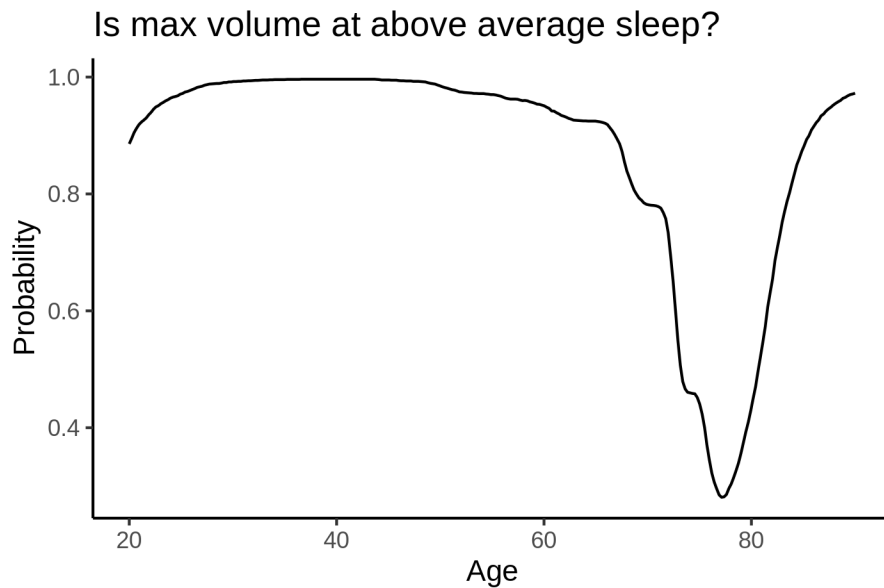

### Controlling for covariates

Below is the output for a model in which we only include data with income and education.

```
##
## Family: gaussian
## Link function: identity
##
## Formula:
```

```

## value ~ sex + site + s(age_z, k = 10, bs = "cr") + s(sleep_z,
##     k = 5, bs = "cr") + icv
## <environment: 0x558ad7a9d8f8>
##
## Parametric coefficients:
##           Estimate Std. Error t value Pr(>|t|)
## (Intercept)  675222.2    3798.7  177.751 < 2e-16 ***
## sexmale      15652.0     419.1   37.350 < 2e-16 ***
## siteousAvanto -80433.2    4797.6  -16.765 < 2e-16 ***
## siteousPrisma -32342.0    4693.8   -6.890 5.67e-12 ***
## siteousSkyra  -49323.3    4098.2  -12.035 < 2e-16 ***
## siteUKB      -17877.4    3793.0   -4.713 2.45e-06 ***
## siteUOXF     -50294.6    4272.6  -11.771 < 2e-16 ***
## icv          46477.7     215.6  215.572 < 2e-16 ***
## ---
## Signif. codes:  0 '***' 0.001 '**' 0.01 '*' 0.05 '.' 0.1 ' ' 1
##
## Approximate significance of smooth terms:
##           edf Ref.df      F p-value
## s(age_z)   6.812  6.812 1046.94 <2e-16 ***
## s(sleep_z) 3.511  3.511  15.32 <2e-16 ***
## ---
## Signif. codes:  0 '***' 0.001 '**' 0.01 '*' 0.05 '.' 0.1 ' ' 1
##
## R-sq.(adj) =  0.763
## lmer.REML = 7.2597e+05  Scale est. = 1.2113e+08  n = 31192

```

Below is the output for a model in which we control for the main effects of income and education.

```

##
## Family: gaussian
## Link function: identity
##
## Formula:
## value ~ sex + site + s(age_z, k = 10, bs = "cr") + s(sleep_z,
##     k = 5, bs = "cr") + icv + income_scaled + education_scaled
## <environment: 0x558ad7a9d8f8>
##
## Parametric coefficients:
##           Estimate Std. Error t value Pr(>|t|)
## (Intercept)  672500.4    3821.9  175.958 < 2e-16 ***
## sexmale      15615.2     420.0   37.179 < 2e-16 ***
## siteousAvanto -80362.9    4796.3  -16.755 < 2e-16 ***
## siteousPrisma -32672.6    4690.9   -6.965 3.35e-12 ***
## siteousSkyra  -49284.0    4096.4  -12.031 < 2e-16 ***
## siteUKB      -17634.0    3793.2   -4.649 3.35e-06 ***
## siteUOXF     -49321.5    4272.6  -11.544 < 2e-16 ***
## icv          46302.5     217.3  213.104 < 2e-16 ***
## income_scaled  2316.7     499.9    4.634 3.60e-06 ***
## education_scaled 1803.3     589.4    3.059 0.00222 **
## ---
## Signif. codes:  0 '***' 0.001 '**' 0.01 '*' 0.05 '.' 0.1 ' ' 1
##
## Approximate significance of smooth terms:
##           edf Ref.df      F p-value

```

```
## s(age_z) 6.835 6.835 940.52 <2e-16 ***
## s(sleep_z) 3.440 3.440 13.04 <2e-16 ***
## ---
## Signif. codes: 0 '***' 0.001 '**' 0.01 '*' 0.05 '.' 0.1 ' ' 1
##
## R-sq.(adj) = 0.763
## lmer.REML = 7.259e+05 Scale est. = 1.212e+08 n = 31192
```

We also included interaction effects between sleep duration and education and income, in another model. The output is shown below, and the interaction terms are `income_scaled:sleep_z` and `education_scaled:sleep_z`.

```
##
## Family: gaussian
## Link function: identity
##
## Formula:
## value ~ sex + site + s(age_z, k = 10, bs = "cr") + s(sleep_z,
## k = 5, bs = "cr") + icv + income_scaled + education_scaled +
## income_scaled:sleep_z + education_scaled:sleep_z
## <environment: 0x558ad7a9d8f8>
##
## Parametric coefficients:
## Estimate Std. Error t value Pr(>|t|)
## (Intercept) 672525.8 3822.0 175.963 < 2e-16 ***
## sexmale 15577.5 420.3 37.065 < 2e-16 ***
## siteousAvanto -80433.9 4796.2 -16.770 < 2e-16 ***
## siteousPrisma -32842.8 4691.2 -7.001 2.59e-12 ***
## siteousSkyra -49357.9 4096.2 -12.050 < 2e-16 ***
## siteUKB -17662.3 3793.4 -4.656 3.24e-06 ***
## siteUOXF -49341.6 4273.6 -11.546 < 2e-16 ***
## icv 46307.6 217.3 213.123 < 2e-16 ***
## income_scaled 2353.3 500.2 4.705 2.55e-06 ***
## education_scaled 1778.9 589.5 3.018 0.00255 **
## income_scaled:sleep_z -1027.0 498.8 -2.059 0.03949 *
## education_scaled:sleep_z 1006.5 572.4 1.758 0.07870 .
## ---
## Signif. codes: 0 '***' 0.001 '**' 0.01 '*' 0.05 '.' 0.1 ' ' 1
##
## Approximate significance of smooth terms:
## edf Ref.df F p-value
## s(age_z) 6.837 6.837 939.60 <2e-16 ***
## s(sleep_z) 3.438 3.438 12.75 <2e-16 ***
## ---
## Signif. codes: 0 '***' 0.001 '**' 0.01 '*' 0.05 '.' 0.1 ' ' 1
##
## R-sq.(adj) = 0.763
## lmer.REML = 7.2587e+05 Scale est. = 1.212e+08 n = 31192
```

We did the same controlling for BMI. Below is the model with no covariates but only keeping data with BMI.

```
##
## Family: gaussian
## Link function: identity
##
## Formula:
```

```

## value ~ sex + site + s(age_z, k = 10, bs = "cr") + s(sleep_z,
##   k = 5, bs = "cr") + icv
## <environment: 0x558b60154c48>
##
## Parametric coefficients:
##           Estimate Std. Error t value Pr(>|t|)
## (Intercept) 599356.3   3023.1 198.258 < 2e-16 ***
## sexmale     15038.4    402.3  37.384 < 2e-16 ***
## siteousPrisma 40722.1   3853.5  10.568 < 2e-16 ***
## siteousSkyra 30061.1   2600.7  11.559 < 2e-16 ***
## siteUCAM     23364.4   3137.3   7.447 9.76e-14 ***
## siteUKB      58816.1   3042.4  19.332 < 2e-16 ***
## siteUmU      34980.3   3440.7  10.167 < 2e-16 ***
## icv          46962.7    207.6 226.210 < 2e-16 ***
## ---
## Signif. codes:  0 '***' 0.001 '**' 0.01 '*' 0.05 '.' 0.1 ' ' 1
##
## Approximate significance of smooth terms:
##           edf Ref.df      F p-value
## s(age_z)   7.496  7.496 1222.88 <2e-16 ***
## s(sleep_z) 3.452  3.452  13.17 <2e-16 ***
## ---
## Signif. codes:  0 '***' 0.001 '**' 0.01 '*' 0.05 '.' 0.1 ' ' 1
##
## R-sq.(adj) =  0.772
## lmer.REML = 7.7733e+05  Scale est. = 1.1321e+08  n = 33447

```

Below is the model output with main effect.

```

##
## Family: gaussian
## Link function: identity
##
## Formula:
## value ~ sex + site + s(age_z, k = 10, bs = "cr") + s(sleep_z,
##   k = 5, bs = "cr") + icv + bmi
## <environment: 0x558b60154c48>
##
## Parametric coefficients:
##           Estimate Std. Error t value Pr(>|t|)
## (Intercept) 611000.29   3176.46 192.353 < 2e-16 ***
## sexmale     15404.24    402.57  38.265 < 2e-16 ***
## siteousPrisma 41271.46   3848.60  10.724 < 2e-16 ***
## siteousSkyra 30177.10   2599.45  11.609 < 2e-16 ***
## siteUCAM     23671.95   3133.81   7.554 4.34e-14 ***
## siteUKB      59214.27   3039.21  19.483 < 2e-16 ***
## siteUmU      35513.62   3436.36  10.335 < 2e-16 ***
## icv          47036.96    207.24 226.971 < 2e-16 ***
## bmi          -463.24     39.15 -11.832 < 2e-16 ***
## ---
## Signif. codes:  0 '***' 0.001 '**' 0.01 '*' 0.05 '.' 0.1 ' ' 1
##
## Approximate significance of smooth terms:
##           edf Ref.df      F p-value
## s(age_z)   7.495  7.495 1227.91 <2e-16 ***

```

```

## s(sleep_z) 3.348 3.348 11.03 <2e-16 ***
## ---
## Signif. codes: 0 '***' 0.001 '**' 0.01 '*' 0.05 '.' 0.1 ' ' 1
##
## R-sq.(adj) = 0.773
## lmer.REML = 7.7718e+05 Scale est. = 1.1315e+08 n = 33447

```

Next is the model with BMI-sleep interaction.

```

##
## Family: gaussian
## Link function: identity
##
## Formula:
## value ~ sex + site + s(age_z, k = 10, bs = "cr") + s(sleep_z,
##     k = 5, bs = "cr") + icv + bmi + bmi:sleep_z
## <environment: 0x558b60154c48>
##
## Parametric coefficients:
##           Estimate Std. Error t value Pr(>|t|)
## (Intercept) 610963.92   3177.79 192.261 < 2e-16 ***
## sexmale     15404.81    402.58  38.266 < 2e-16 ***
## siteousPrisma 41273.74   3848.64  10.724 < 2e-16 ***
## siteousSkyra 30182.38   2599.50  11.611 < 2e-16 ***
## siteUCAM     23686.17   3134.04   7.558 4.21e-14 ***
## siteUKB      59229.13   3039.45  19.487 < 2e-16 ***
## siteUmU      35526.21   3436.54  10.338 < 2e-16 ***
## icv          47037.65    207.25 226.965 < 2e-16 ***
## bmi          -462.70     39.18 -11.811 < 2e-16 ***
## bmi:sleep_z   14.89     37.22   0.400   0.689
## ---
## Signif. codes: 0 '***' 0.001 '**' 0.01 '*' 0.05 '.' 0.1 ' ' 1
##
## Approximate significance of smooth terms:
##           edf Ref.df      F p-value
## s(age_z)   7.495  7.495 1227.412 < 2e-16 ***
## s(sleep_z) 3.340  3.340   9.383 2.05e-06 ***
## ---
## Signif. codes: 0 '***' 0.001 '**' 0.01 '*' 0.05 '.' 0.1 ' ' 1
##
## R-sq.(adj) = 0.773
## lmer.REML = 7.7718e+05 Scale est. = 1.1315e+08 n = 33447

```

We did the same controlling for depression. Below is the model with no covariates but only keeping data with depression.

```

##
## Family: gaussian
## Link function: identity
##
## Formula:
## value ~ sex + site + s(age_z, k = 10, bs = "cr") + s(sleep_z,
##     k = 5, bs = "cr") + icv
## <environment: 0x55897646f050>
##
## Parametric coefficients:

```



```

##           Estimate Std. Error t value Pr(>|t|)
## (Intercept) 656906.3    1903.8 345.054 < 2e-16 ***
## sexmale     15204.8     406.5  37.408 < 2e-16 ***
## siteousAvanto -48905.1   4695.3 -10.416 < 2e-16 ***
## siteousPrisma -13980.9   3767.9  -3.711 0.000207 ***
## siteousSkyra -23131.1   2923.7  -7.912 2.62e-15 ***
## siteUCAM     -34194.1   2621.2 -13.045 < 2e-16 ***
## siteUKB       748.2     1882.2   0.397 0.691005
## siteUmU      -22989.7   2560.8  -8.978 < 2e-16 ***
## icv          46674.0    209.4 222.865 < 2e-16 ***
## ---
## Signif. codes:  0 '***' 0.001 '**' 0.01 '*' 0.05 '.' 0.1 ' ' 1
##
## Approximate significance of smooth terms:
##           edf Ref.df      F p-value
## s(age_z)   7.504  7.504 1057.92 <2e-16 ***
## s(sleep_z) 3.492  3.492  15.14 <2e-16 ***
## ---
## Signif. codes:  0 '***' 0.001 '**' 0.01 '*' 0.05 '.' 0.1 ' ' 1
##
## R-sq.(adj) =  0.769
## lmer.REML = 7.754e+05 Scale est. = 1.0814e+08 n = 33359

```

Below is the model output with main effect.

```

##
## Family: gaussian
## Link function: identity
##
## Formula:
## value ~ sex + site + s(age_z, k = 10, bs = "cr") + s(sleep_z,
##           k = 5, bs = "cr") + icv + depression
## <environment: 0x55897646f050>
##
## Parametric coefficients:
##           Estimate Std. Error t value Pr(>|t|)
## (Intercept) 657842.6    1911.4 344.172 < 2e-16 ***
## sexmale     15108.4     406.7  37.149 < 2e-16 ***
## siteousAvanto -48423.6   4694.8 -10.314 < 2e-16 ***
## siteousPrisma -13559.7   3767.2  -3.599 0.000319 ***
## siteousSkyra -22583.1   2924.3  -7.722 1.17e-14 ***
## siteUCAM     -33980.5   2620.3 -12.968 < 2e-16 ***
## siteUKB       361.0     1882.9   0.192 0.847943
## siteUmU      -20164.5   2615.8  -7.709 1.31e-14 ***
## icv          46688.5    209.4 223.009 < 2e-16 ***
## depression   -7629.3    1455.0  -5.244 1.58e-07 ***
## ---
## Signif. codes:  0 '***' 0.001 '**' 0.01 '*' 0.05 '.' 0.1 ' ' 1
##
## Approximate significance of smooth terms:
##           edf Ref.df      F p-value
## s(age_z)   7.500  7.500 1057.83 <2e-16 ***
## s(sleep_z) 3.421  3.421  12.87 <2e-16 ***
## ---
## Signif. codes:  0 '***' 0.001 '**' 0.01 '*' 0.05 '.' 0.1 ' ' 1

```

```
##
## R-sq.(adj) = 0.769
## lmer.REML = 7.7536e+05 Scale est. = 1.081e+08 n = 33359
```

Next is the model with depression-sleep interaction.

```
##
## Family: gaussian
## Link function: identity
##
## Formula:
## value ~ sex + site + s(age_z, k = 10, bs = "cr") + s(sleep_z,
##     k = 5, bs = "cr") + icv + depression + depression:sleep_z
## <environment: 0x55897646f050>
##
## Parametric coefficients:
##              Estimate Std. Error t value Pr(>|t|)
## (Intercept)   657843.8    1911.4  344.170 < 2e-16 ***
## sexmale       15103.8     406.8   37.131 < 2e-16 ***
## siteousAvanto -48456.0    4695.0  -10.321 < 2e-16 ***
## siteousPrisma -13594.0    3767.6   -3.608 0.000309 ***
## siteousSkyra  -22614.9    2924.8   -7.732 1.09e-14 ***
## siteUCAM      -34012.0    2620.8  -12.978 < 2e-16 ***
## siteUKB        361.8     1882.9    0.192 0.847631
## siteUmU       -19938.0    2639.9   -7.553 4.38e-14 ***
## icv           46688.8     209.4  223.007 < 2e-16 ***
## depression    -7690.4    1458.4   -5.273 1.35e-07 ***
## depression:sleep_z -690.1    1082.0   -0.638 0.523591
## ---
## Signif. codes:  0 '***' 0.001 '**' 0.01 '*' 0.05 '.' 0.1 ' ' 1
##
## Approximate significance of smooth terms:
##              edf Ref.df      F p-value
## s(age_z)     7.497  7.497 1058.13 <2e-16 ***
## s(sleep_z)   3.426  3.426   11.93 <2e-16 ***
## ---
## Signif. codes:  0 '***' 0.001 '**' 0.01 '*' 0.05 '.' 0.1 ' ' 1
##
## R-sq.(adj) = 0.769
## lmer.REML = 7.7534e+05 Scale est. = 1.081e+08 n = 33359
```

The plot below shows the sleep-volume curve for the original model and for the model with main effects of SES.

TotalGrayVol sleep effect, covariates

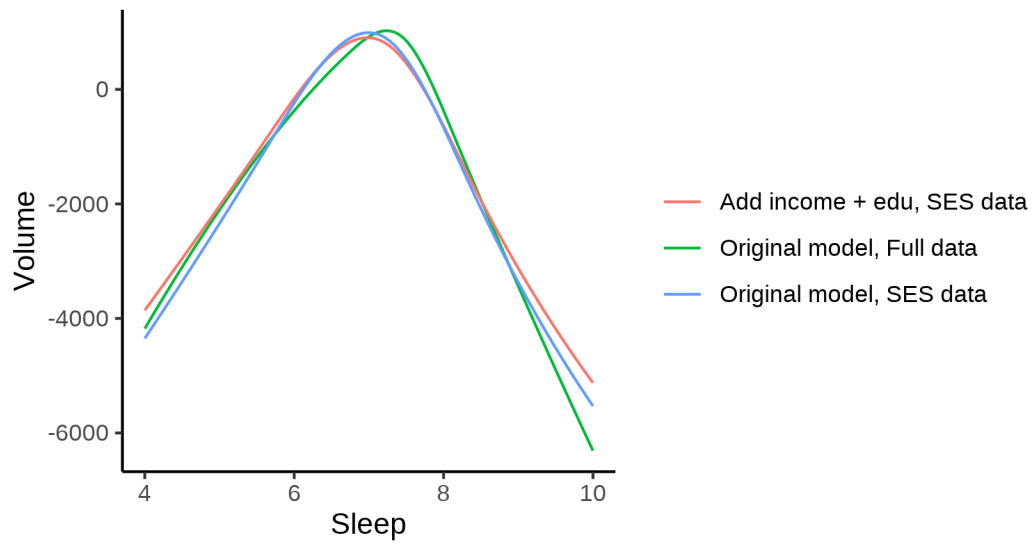

The plot below shows the sleep-volume curve for the original model and for the model with main effects of BMI.

TotalGrayVol sleep effect, covariates

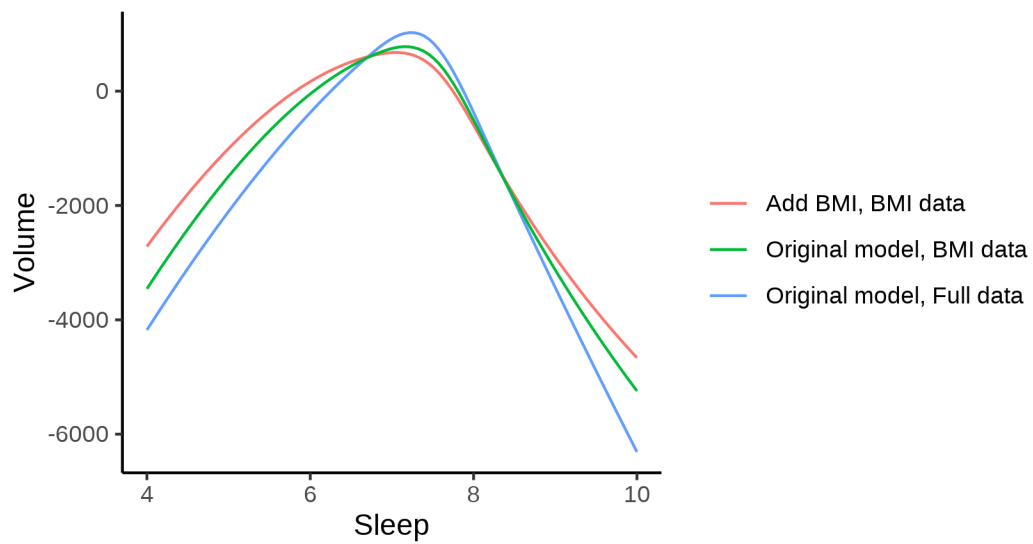

The plot below shows the sleep-volume curve for the original model and for the model with main effects of depression.

## TotalGrayVol sleep effect, covariates

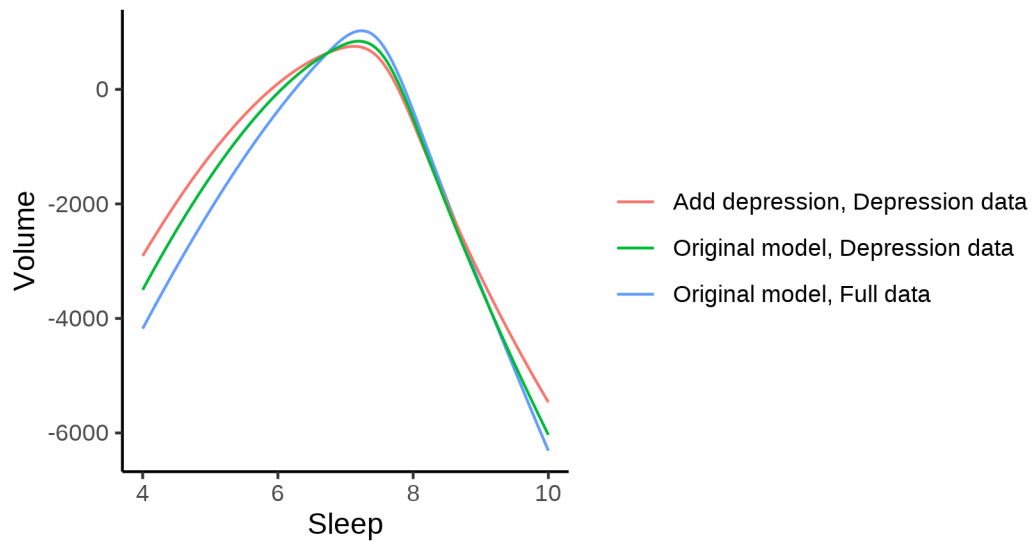

## Models Not controlling for ICV

### Model outputs

Model without sleep term

```
##
## Family: gaussian
## Link function: identity
##
## Formula:
## value ~ sex + site + s(age_z, k = 10, bs = "cr")
## <environment: 0x55895c6bba00>
##
## Parametric coefficients:
##              Estimate Std. Error t value Pr(>|t|)
## (Intercept)  581423.9    2518.4  230.871 < 2e-16 ***
## sexmale      67598.0     438.3  154.231 < 2e-16 ***
## siteMPIB     -16256.1    3270.6  -4.970 6.71e-07 ***
## siteousAvanto 15039.2    2588.3   5.811 6.26e-09 ***
## siteousPrisma 39956.1    4371.5   9.140 < 2e-16 ***
## siteousSkyra  23528.2    2504.8   9.393 < 2e-16 ***
## siteUB        597.0     7858.4   0.076 0.9394
## siteUCAM      18001.0    2846.9   6.323 2.59e-10 ***
## siteUKB       53501.5    2584.7  20.699 < 2e-16 ***
## siteUmU       8532.8    3691.8   2.311 0.0208 *
## siteUOXF      194.5     3093.9   0.063 0.9499
## ---
## Signif. codes:  0 '***' 0.001 '**' 0.01 '*' 0.05 '.' 0.1 ' ' 1
##
## Approximate significance of smooth terms:
##              edf Ref.df   F p-value
## s(age_z)    6.487  6.487 1304 <2e-16 ***
```

```
## ---
## Signif. codes:  0 '***' 0.001 '**' 0.01 '*' 0.05 '.' 0.1 ' ' 1
##
## R-sq.(adj) =  0.406
## lmer.REML = 1.2391e+06  Scale est. = 1.1093e+08  n = 51282
```

Model with only main effects of age and sleep

```
##
## Family: gaussian
## Link function: identity
##
## Formula:
## value ~ sex + site + s(age_z, k = 10, bs = "cr") + s(sleep_z,
##       k = 5, bs = "cr")
## <environment: 0x55895c6bba00>
```

```
## Parametric coefficients:
##           Estimate Std. Error t value Pr(>|t|)
## (Intercept)  582618.1    2517.2 231.459 < 2e-16 ***
## sexmale      67414.4     437.7 154.003 < 2e-16 ***
## siteMPIB     -16563.5    3266.4  -5.071 3.97e-07 ***
## siteousAvanto 14200.0    2585.1   5.493 3.97e-08 ***
## siteousPrisma 39339.2    4365.3   9.012 < 2e-16 ***
## siteousSkyra  22644.2    2501.4   9.053 < 2e-16 ***
## siteUB        1079.3     7843.3   0.138  0.8906
## siteUCAM      17807.5    2842.3   6.265 3.75e-10 ***
## siteUKB       52333.9    2583.3  20.258 < 2e-16 ***
## siteUmU       7580.8     3693.5   2.052  0.0401 *
## siteUOXF      -321.3     3088.9  -0.104  0.9171
```

```
## ---
## Signif. codes:  0 '***' 0.001 '**' 0.01 '*' 0.05 '.' 0.1 ' ' 1
##
```

```
## Approximate significance of smooth terms:
##           edf Ref.df      F p-value
## s(age_z)   6.474  6.474 1290.78 <2e-16 ***
## s(sleep_z) 3.814  3.814   45.04 <2e-16 ***
```

```
## ---
## Signif. codes:  0 '***' 0.001 '**' 0.01 '*' 0.05 '.' 0.1 ' ' 1
##
```

```
## R-sq.(adj) =  0.408
## lmer.REML = 1.2389e+06  Scale est. = 1.1097e+08  n = 51282
```

Model with full interaction between age and sleep

```
##
## Family: gaussian
## Link function: identity
##
## Formula:
## value ~ sex + site + t2(age_z, sleep_z, k = c(10, 4), bs = "cr")
## <environment: 0x55895c6bba00>
```

```
## Parametric coefficients:
##           Estimate Std. Error t value Pr(>|t|)
## (Intercept)  583617.3    2503.6 233.111 < 2e-16 ***
```

```

## sexmale          67521.4      438.8 153.892 < 2e-16 ***
## siteMPIB        -17947.3     3272.4  -5.484 4.17e-08 ***
## siteousAvanto   13349.8     2592.8   5.149 2.63e-07 ***
## siteousPrisma   38530.1     4373.6   8.810 < 2e-16 ***
## siteousSkyra    21736.6     2509.8   8.661 < 2e-16 ***
## siteUB          -657.5      7842.4  -0.084 0.9332
## siteUCAM        16391.0     2847.5   5.756 8.65e-09 ***
## siteUKB         51276.8     2568.3  19.965 < 2e-16 ***
## siteUmU         6478.1      3693.3   1.754 0.0794 .
## siteUOXF       -1804.6      3081.5  -0.586 0.5581
## ---
## Signif. codes:  0 '***' 0.001 '**' 0.01 '*' 0.05 '.' 0.1 ' ' 1
##
## Approximate significance of smooth terms:
##              edf Ref.df   F p-value
## t2(age_z,sleep_z) 13.65 13.65 59.2 <2e-16 ***
## ---
## Signif. codes:  0 '***' 0.001 '**' 0.01 '*' 0.05 '.' 0.1 ' ' 1
##
## R-sq.(adj) = 0.408
## lmer.REML = 1.239e+06  Scale est. = 1.1099e+08  n = 51282

```

## Model comparison

`mod_no_sleep` refers to model without sleep term, `mod_no_interaction` refers to model with only main effect of sleep, and `mod_full` refers to model with a full interaction between age and sleep. This is a nested model comparison, and the p-value at a given line refers to comparing the model at the line to the model on the line above. Hence, significance implies that the more complicated model is supported on statistical grounds.

To be even more specific, the p-value on the second row tests whether there is an association between sleep and volume. The p-value on the third row tests whether this association depends on age.

```

## Data: NULL
## Models:
## ml$mod_no_sleep$mer: NULL
## ml$mod_no_interaction$mer: NULL
## ml$mod_full$mer: NULL
##
##              npar      AIC      BIC logLik deviance Chisq Df Pr(>Chisq)
## ml$mod_no_sleep$mer      15 1239131 1239263 -619550 1239101
## ml$mod_no_interaction$mer  17 1238971 1239121 -619468 1238937 163.77 2 <2e-16 ***
## ml$mod_full$mer          19 1238992 1239160 -619477 1238954 0.00 2 1
## ---
## Signif. codes:  0 '***' 0.001 '**' 0.01 '*' 0.05 '.' 0.1 ' ' 1

```

We chose the model based on the likelihood ratio test with 5 % significance level, which was `mod_no_interaction`.

## Lifespan brain trajectory

The trajectory shown is from the chosen model `mod_no_interaction_no_icv`.

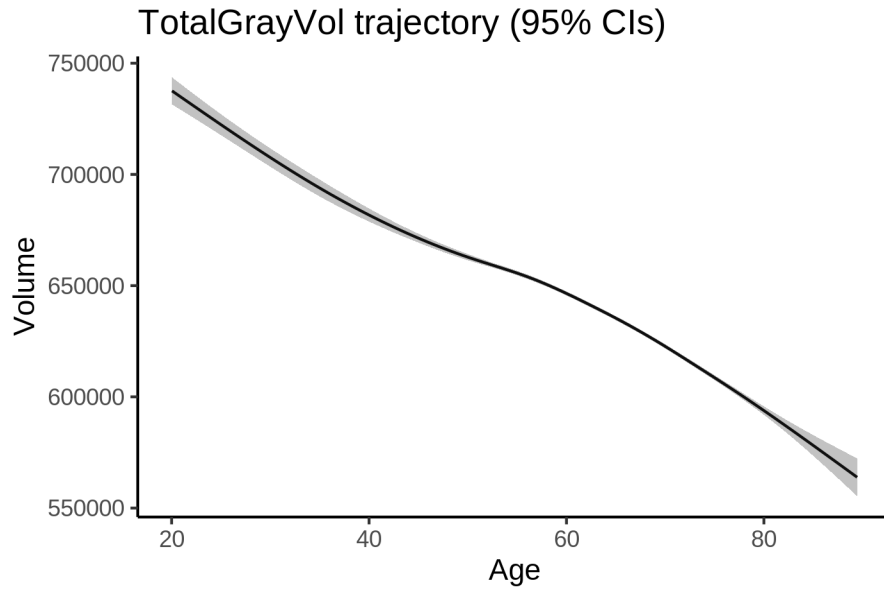

### Effect of sleep

The chosen model only included the main effect of sleep, and hence the effect does not vary with age. The black dot shows the average sleep duration across all ages in the sample.

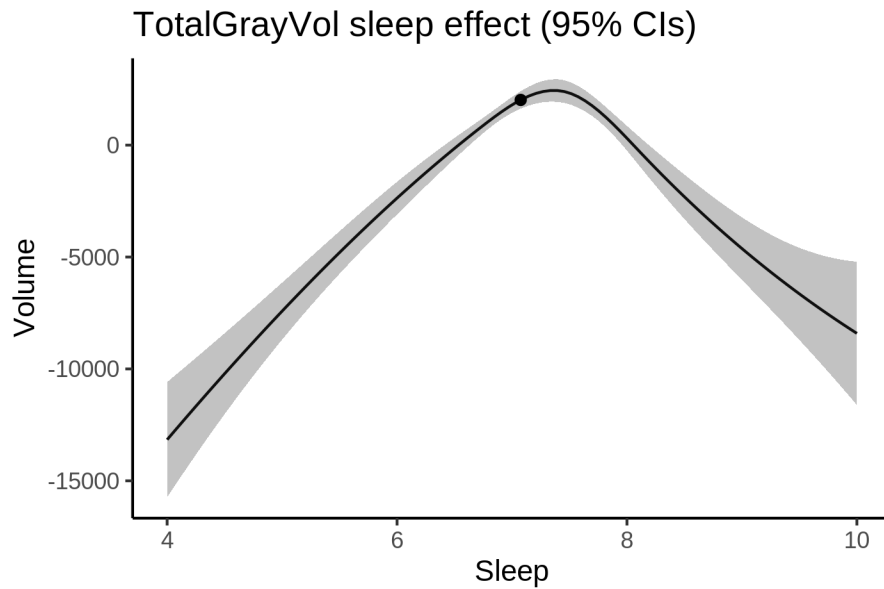

We also show the full interaction model for completeness, although it was not selected.

### TotalGrayVol sleep effect (95% CIs)

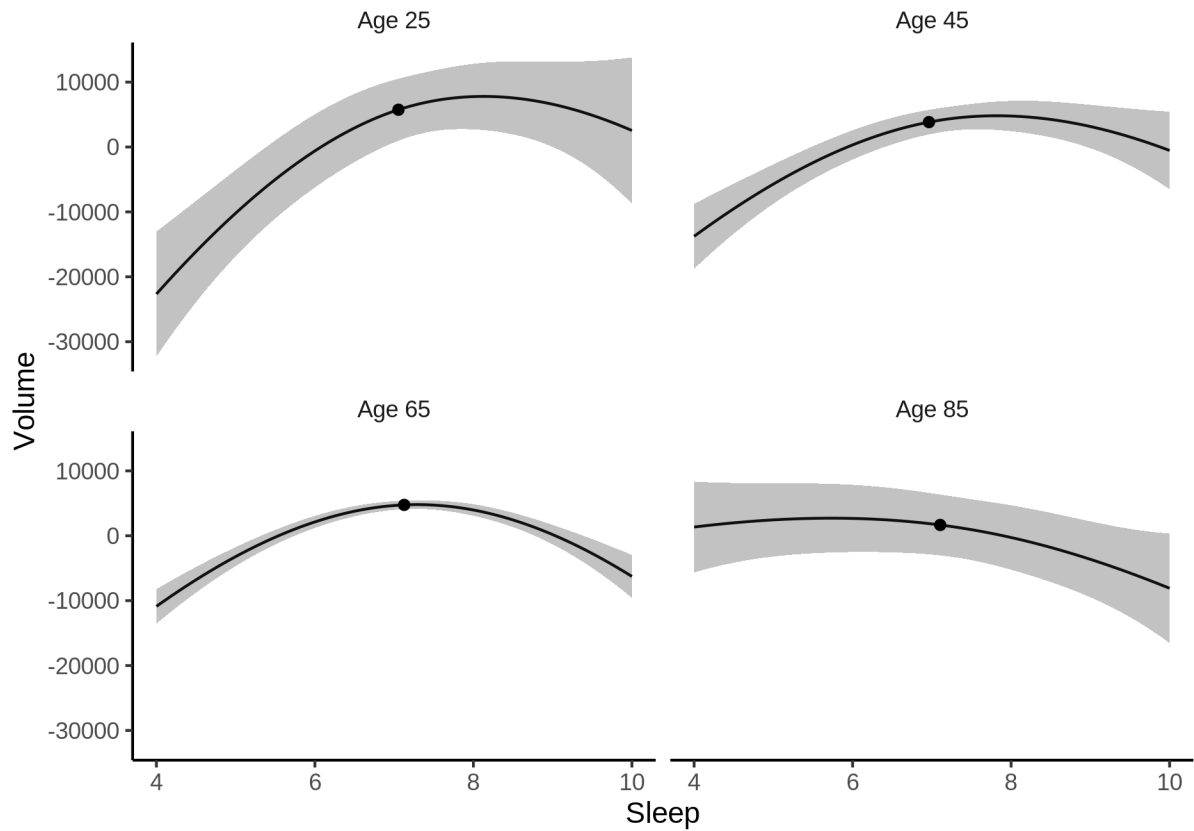

### Deviation from sleep associated with maximal volume

Model with only main effect of sleep was chosen, so we show it for all ages at once. Maximum volume is attained at 7.4 hours of sleep. The percentage values in the plot are calculated as follows: The maximum at 100 % refers to a person at an arbitrary age with a sleep duration associated with maximum volume. For a female, this volume is 652185 and for a male it is 719599. The other percentage values show how large the expected volume is for someone with other sleep durations. For example, 99 % implies a 1 % reduction.

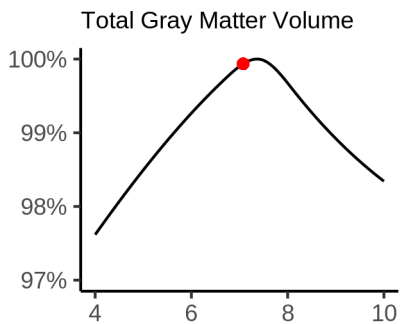



### Comparison of mean sleep and sleep associated with maximum volume

A 95 % confidence interval for the sleep associated with maximum volume is [7.27, 7.39].

The plot below compares average sleep to the sleep associated with maximum volume.

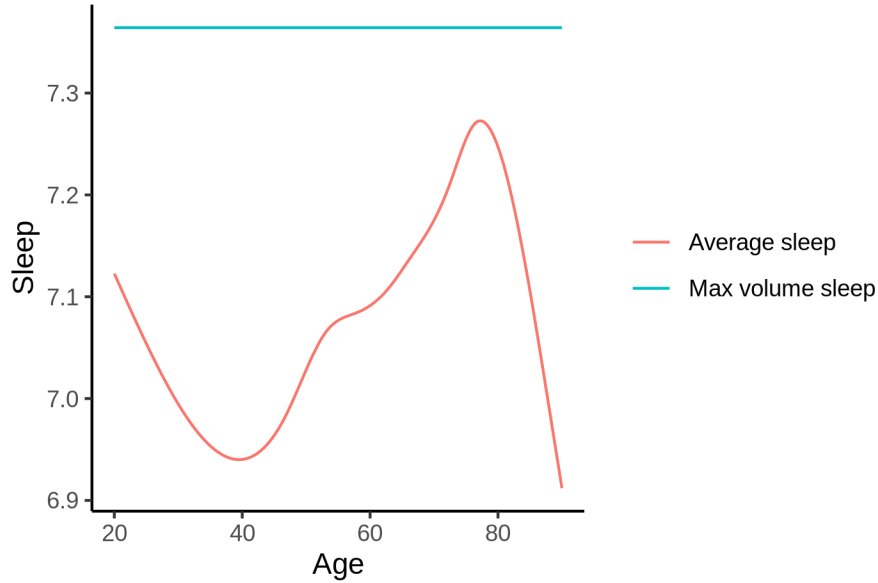

The next plot shows the difference between average sleep and sleep associated with maximum volume. The shaded region is a 95 % confidence interval.

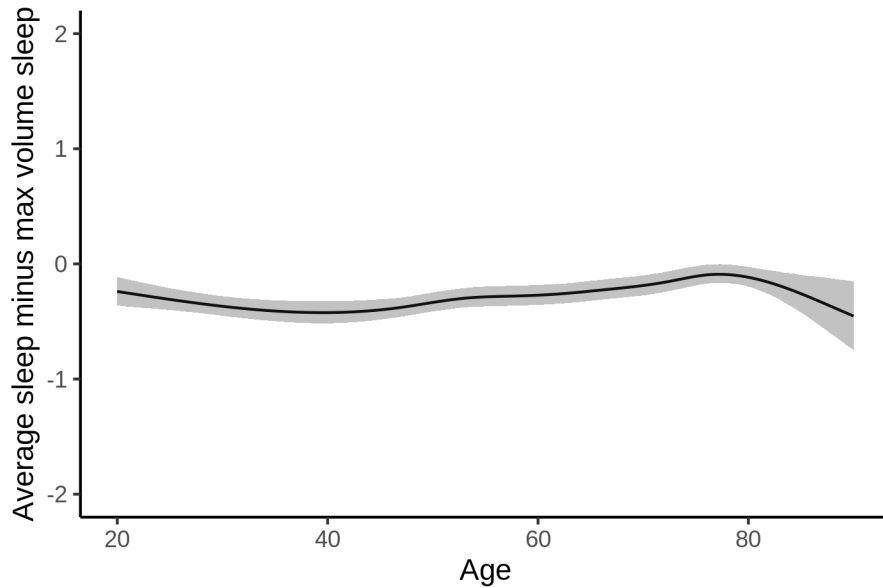

The next plot shows the probability that the sleep duration associated with maximum volume is longer than the average sleep duration, as a function of age. Probability below .05 can be interpreted as evidence that the sleep associated with maximum volume is shorter than the mean sleep, and probability above .95 can be interpreted the opposite way.

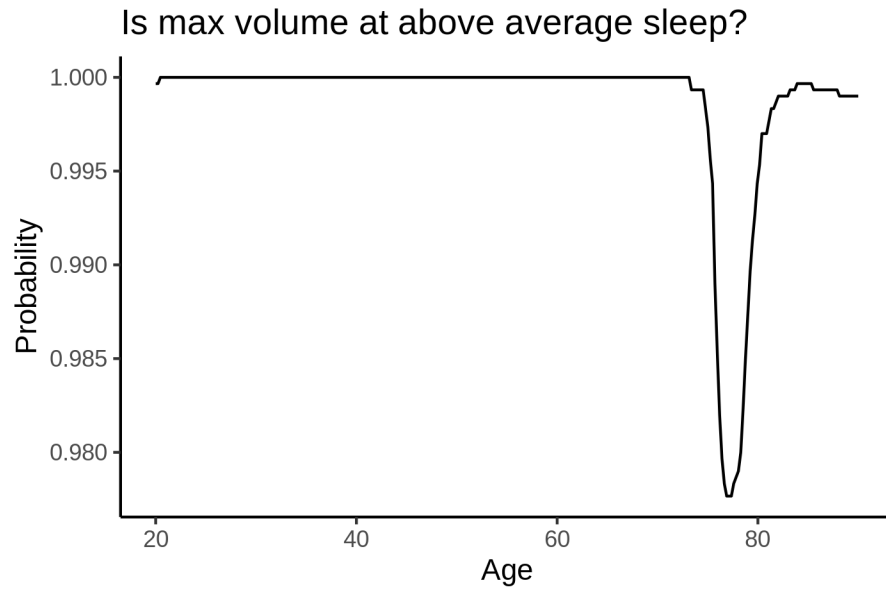

## Ventricles

### Descriptive statistics

| Study | Observations | Unique IDs | Mean age | Age range |
|-------|--------------|------------|----------|-----------|
| HCP   | 974          | 974        | 28.8     | 22 - 37   |
| MPIB  | 677          | 391        | 63.1     | 24 - 83   |
| UB    | 113          | 39         | 70.9     | 64 - 81   |
| UCAM  | 884          | 632        | 55.1     | 20 - 88   |
| UiO   | 1460         | 803        | 49.2     | 20 - 89   |
| UKB   | 45979        | 43135      | 64.5     | 45 - 83   |
| UmU   | 412          | 279        | 62.2     | 25 - 85   |
| UOXF  | 769          | 769        | 69.8     | 60 - 85   |

## Spaghetti plot

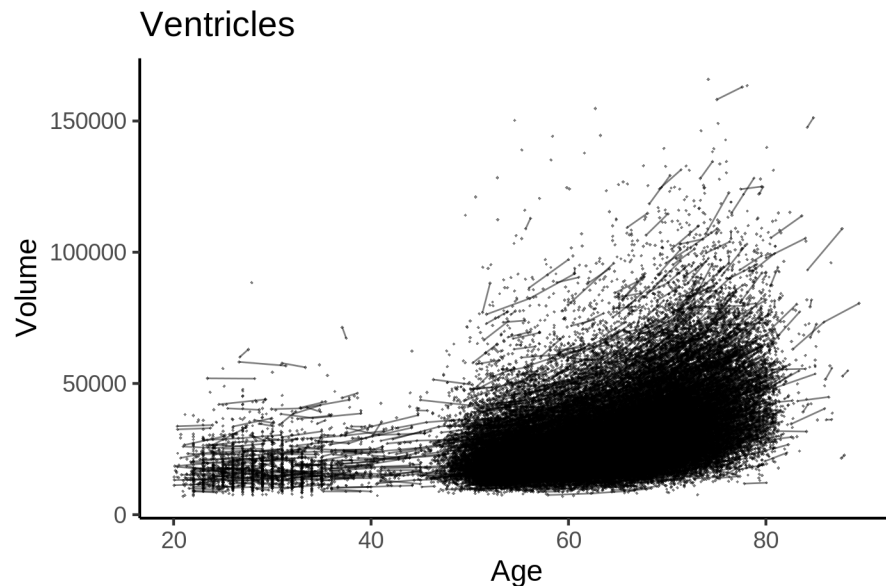

## Models Controlling for ICV

### Model outputs

Model without sleep term

```
##
## Family: gaussian
## Link function: identity
##
## Formula:
## value ~ sex + site + icv + s(age_z, k = 10, bs = "cr")
## <environment: 0x558963bebd30>
##
## Parametric coefficients:
##              Estimate Std. Error t value Pr(>|t|)
## (Intercept)  31235.34    600.16  52.045 < 2e-16 ***
## sexmale      1887.28     141.49  13.339 < 2e-16 ***
## siteMPIB     11324.82    845.86  13.388 < 2e-16 ***
## siteousAvanto  834.77     647.56   1.289  0.1974
## siteousPrisma  360.15     970.56   0.371  0.7106
## siteousSkyra  4347.81     644.51   6.746 1.54e-11 ***
## siteUB       -1098.79    2098.99  -0.523  0.6006
## siteUCAM      128.31     724.35   0.177  0.8594
## siteUKB      -571.38     611.99  -0.934  0.3505
## siteUmU       5022.57     947.10   5.303 1.14e-07 ***
## siteUOXF      1804.74     763.36   2.364  0.0181 *
## icv           6211.59      69.92  88.835 < 2e-16 ***
## ---
## Signif. codes:  0 '***' 0.001 '**' 0.01 '*' 0.05 '.' 0.1 ' ' 1
##
```

```

## Approximate significance of smooth terms:
##           edf Ref.df      F p-value
## s(age_z) 8.373  8.373 2510 <2e-16 ***
## ---
## Signif. codes:  0 '***' 0.001 '**' 0.01 '*' 0.05 '.' 0.1 ' ' 1
##
## R-sq.(adj) =  0.391
## lmer.REML = 1.0979e+06  Scale est. = 2.0658e+06  n = 51268

Model with only main effects of age and sleep

##
## Family: gaussian
## Link function: identity
##
## Formula:
## value ~ sex + site + icv + s(age_z, k = 10, bs = "cr") + s(sleep_z,
##           k = 5, bs = "cr")
## <environment: 0x558963bebd30>
##
## Parametric coefficients:
##           Estimate Std. Error t value Pr(>|t|)
## (Intercept) 31264.34    600.68  52.048 < 2e-16 ***
## sexmale      1890.23    141.47  13.362 < 2e-16 ***
## siteMPIB     11249.10   846.15  13.294 < 2e-16 ***
## siteousAvanto  828.13    647.66   1.279  0.2010
## siteousPrisma 358.52    970.60   0.369  0.7118
## siteousSkyra  4345.16   644.64   6.740 1.60e-11 ***
## siteUB       -1132.56  2098.58  -0.540  0.5894
## siteUCAM      104.29    724.29   0.144  0.8855
## siteUKB       -602.99   612.57  -0.984  0.3249
## siteUmU       4844.60   948.95   5.105 3.32e-07 ***
## siteUOXF      1804.37   763.33   2.364  0.0181 *
## icv           6212.42    69.98  88.775 < 2e-16 ***
## ---
## Signif. codes:  0 '***' 0.001 '**' 0.01 '*' 0.05 '.' 0.1 ' ' 1
##
## Approximate significance of smooth terms:
##           edf Ref.df      F p-value
## s(age_z)   8.373  8.373 2489.484 < 2e-16 ***
## s(sleep_z) 2.624  2.624   5.613 0.000926 ***
## ---
## Signif. codes:  0 '***' 0.001 '**' 0.01 '*' 0.05 '.' 0.1 ' ' 1
##
## R-sq.(adj) =  0.392
## lmer.REML = 1.0979e+06  Scale est. = 2.0668e+06  n = 51268

Model with full interaction between age and sleep

##
## Family: gaussian
## Link function: identity
##
## Formula:
## value ~ sex + site + icv + t2(age_z, sleep_z, k = c(10, 4), bs = "cr")
## <environment: 0x558963bebd30>

```

```

##
## Parametric coefficients:
##           Estimate Std. Error t value Pr(>|t|)
## (Intercept) 31361.08   603.38  51.976 < 2e-16 ***
## sexmale     1906.49   141.72  13.453 < 2e-16 ***
## siteMPIB    11172.38   850.01  13.144 < 2e-16 ***
## siteousAvanto 783.99   651.48   1.203  0.2288
## siteousPrisma 282.01   972.66   0.290  0.7719
## siteousSkyra 4285.38   648.63   6.607 3.96e-11 ***
## siteUB      -1253.56  2099.88  -0.597  0.5505
## siteUCAM     54.52   728.00   0.075  0.9403
## siteUKB     -712.01   615.31  -1.157  0.2472
## siteUmU     4772.10   951.53   5.015 5.32e-07 ***
## siteUOXF    1683.41   766.37   2.197  0.0281 *
## icv         6211.60    69.96  88.792 < 2e-16 ***
## ---
## Signif. codes:  0 '***' 0.001 '**' 0.01 '*' 0.05 '.' 0.1 ' ' 1
##
## Approximate significance of smooth terms:
##           edf Ref.df      F p-value
## t2(age_z,sleep_z) 15.69  15.69 115.7 <2e-16 ***
## ---
## Signif. codes:  0 '***' 0.001 '**' 0.01 '*' 0.05 '.' 0.1 ' ' 1
##
## R-sq.(adj) =  0.392
## lmer.REML = 1.0978e+06  Scale est. = 2.0562e+06  n = 51268

```

## Model comparison

mod\_no\_sleep refers to model without sleep term, mod\_no\_interaction refers to model with only main effect of sleep, and mod\_full refers to model with a full interaction between age and sleep. This is a nested model comparison, and the p-value at a given line refers to comparing the model at the line to the model on the line above. Hence, significance implies that the more complicated model is supported on statistical grounds.

To be even more specific, the p-value on the second row tests whether there is an association between sleep and volume. The p-value on the third row tests whether this association depends on age.

```

## Data: NULL
## Models:
## ml$mod_no_sleep$mer: NULL
## ml$mod_no_interaction$mer: NULL
## ml$mod_full$mer: NULL
##           npar      AIC      BIC  logLik deviance  Chisq Df Pr(>Chisq)
## ml$mod_no_sleep$mer           16 1097903 1098045 -548936  1097871
## ml$mod_no_interaction$mer      18 1097894 1098053 -548929  1097858 12.898  2  0.0015825 **
## ml$mod_full$mer                 20 1097884 1098061 -548922  1097844 13.837  2  0.0009895 ***
## ---
## Signif. codes:  0 '***' 0.001 '**' 0.01 '*' 0.05 '.' 0.1 ' ' 1

```

We chose the model based on the likelihood ratio test with 5 % significance level, which was mod\_full.

### Lifespan brain trajectory

The trajectory shown is from the chosen model `mod_full`.

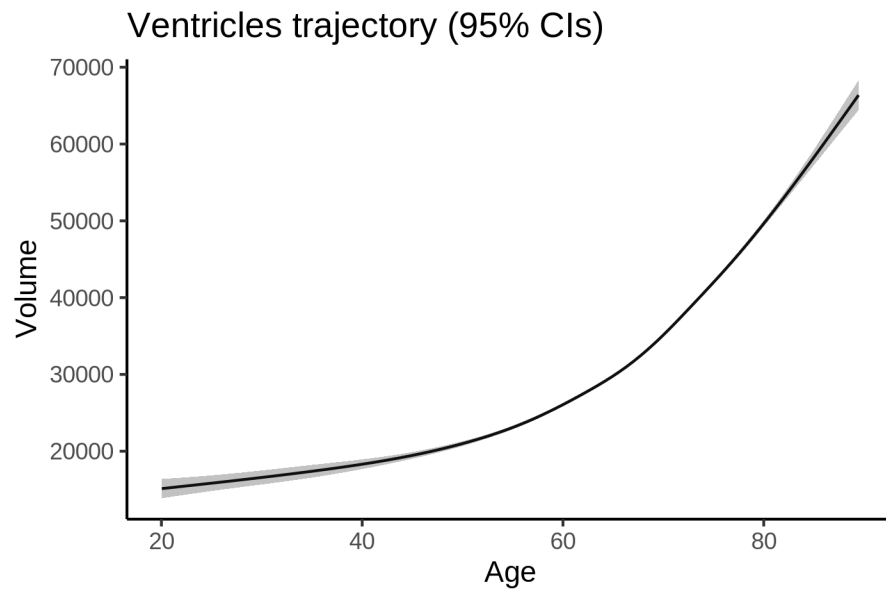

### Effect of sleep

The chosen model included a full interaction between age and sleep, and the effect of sleep is hence plotted for a set of different ages. For comparability across ages, the sleep-volume curves at each age have been standardized so that they sum to zero.

### Ventricles sleep effect (95% CIs)

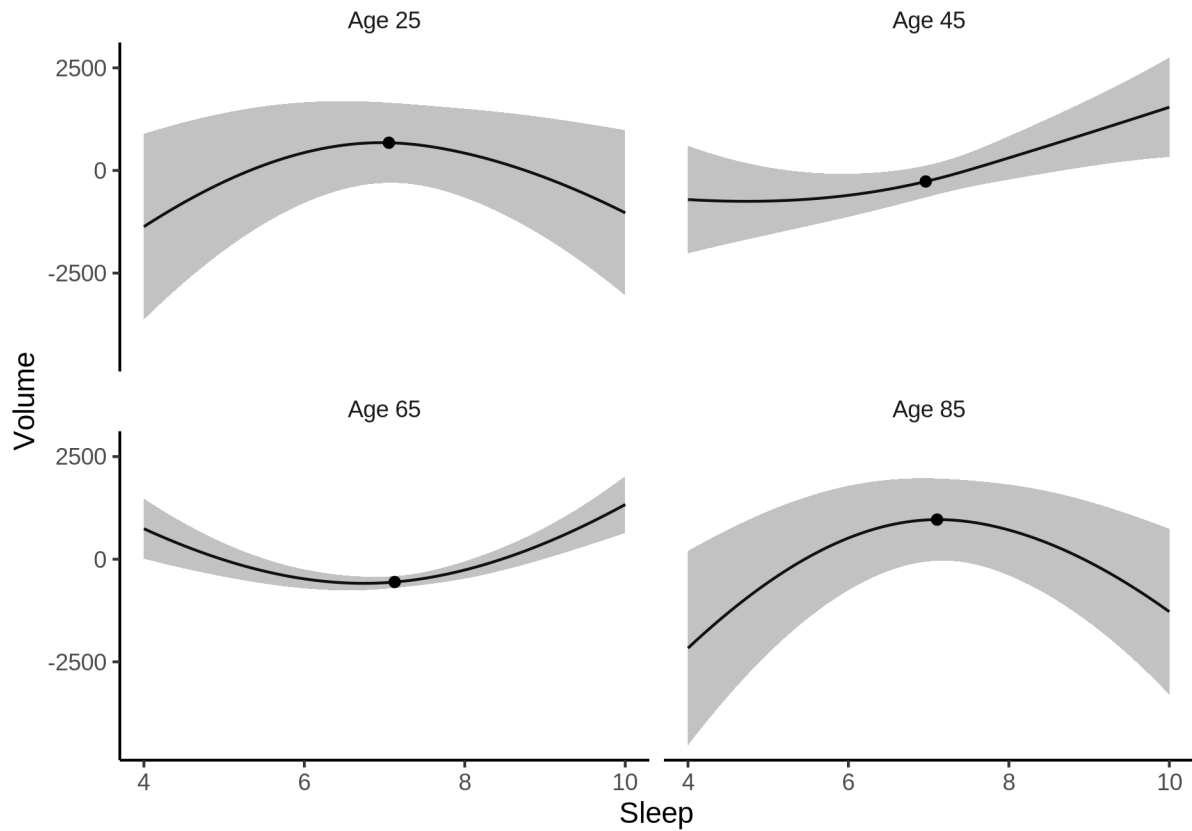

### Deviation from sleep associated with maximal volume

The table show the sleep associated with maximum volume at chosen ages.

| Age | Sleep at max vol |
|-----|------------------|
| 25  | 7.0              |
| 45  | 10.0             |
| 65  | 10.0             |
| 85  | 7.1              |

Model with sleep-age interaction was chosen, so we show it for four selected ages. The percentage values in the plot are calculated as follows: The maximum at 100 % refers to a person at the given age with a sleep duration associated with maximum volume. The other percentage values show how large the expected volume is for someone with other sleep durations. For example, 99 % implies a 1 % reduction.

### Ventricles sleep effect

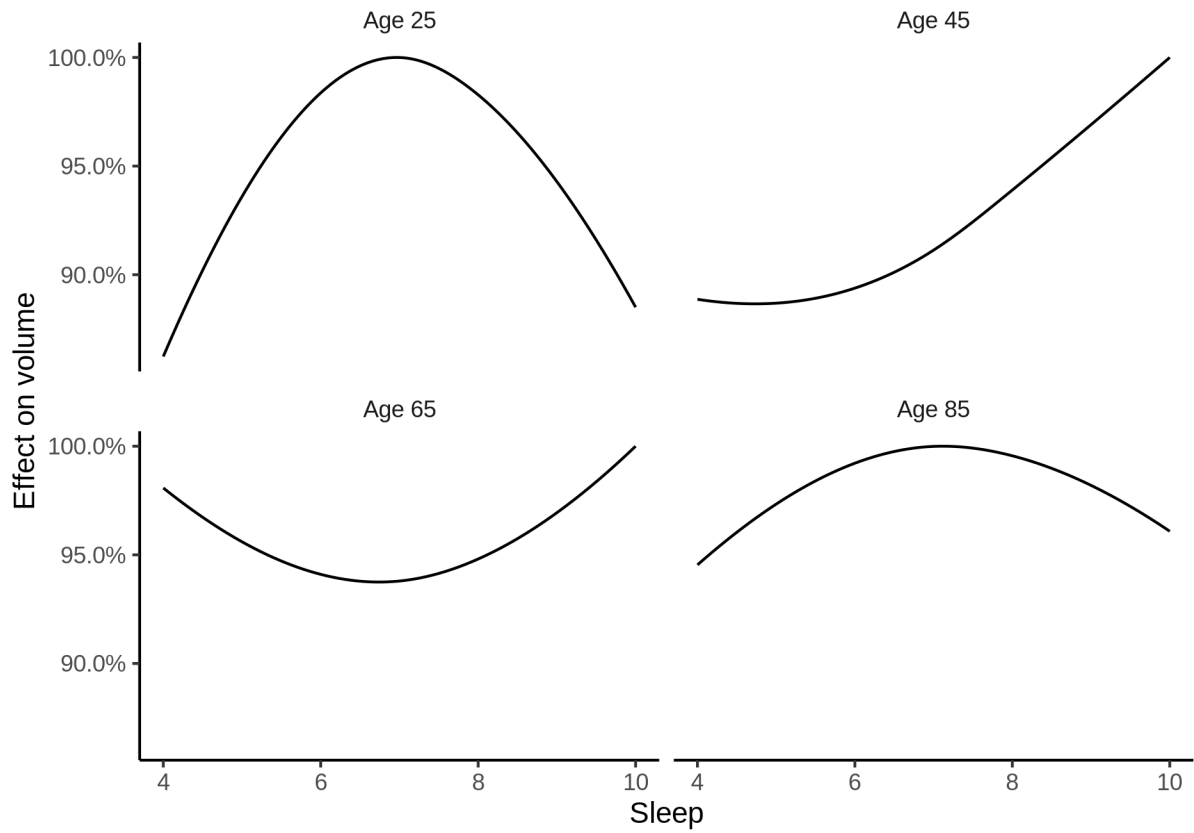

### Comparison of mean sleep and sleep associated with maximum volume

The plot below compares average sleep to the sleep associated with maximum volume.

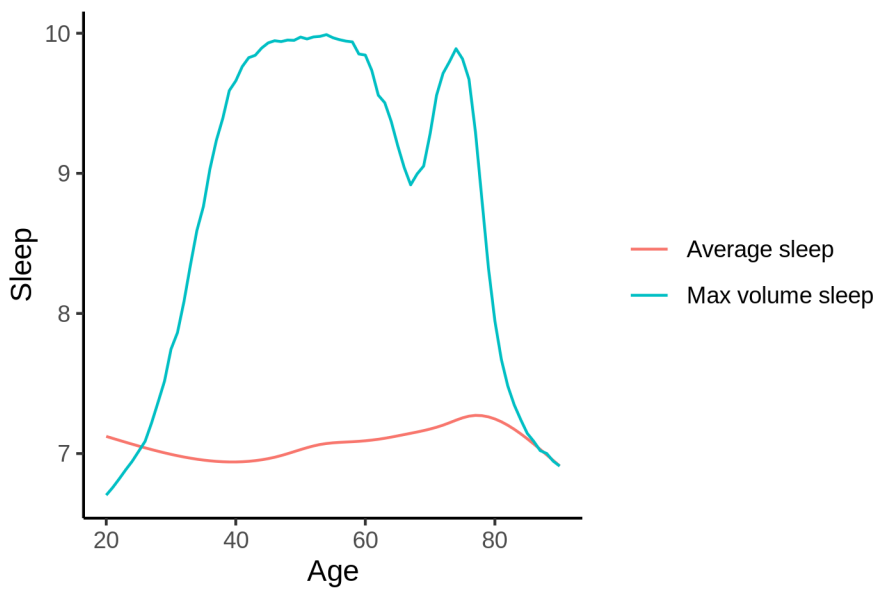



The next plot shows the difference between average sleep and sleep associated with maximum volume. The shaded region is a 95 % confidence interval.

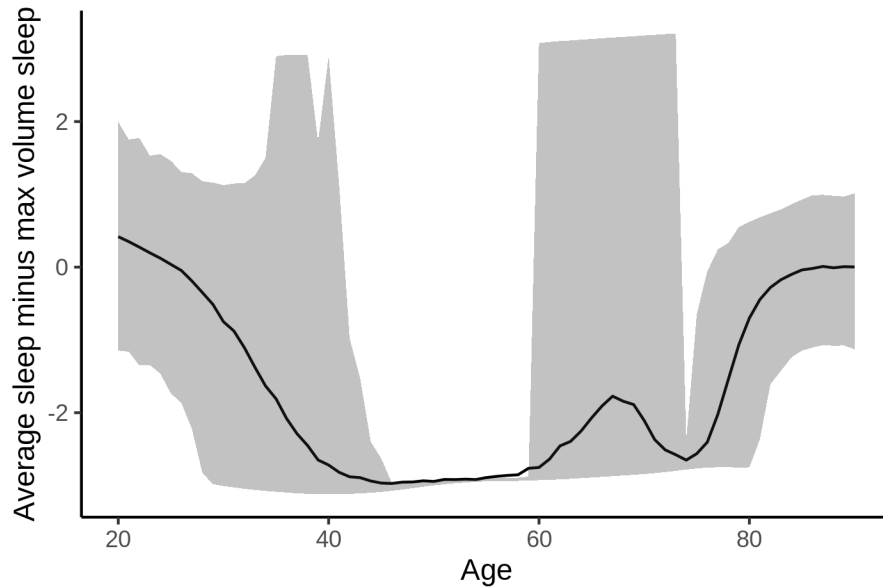

The next plot shows the probability that the sleep duration associated with maximum volume is longer than the average sleep duration, as a function of age. Probability below .05 can be interpreted as evidence that the sleep associated with maximum volume is shorter than the mean sleep, and probability above .95 can be interpreted the opposite way.

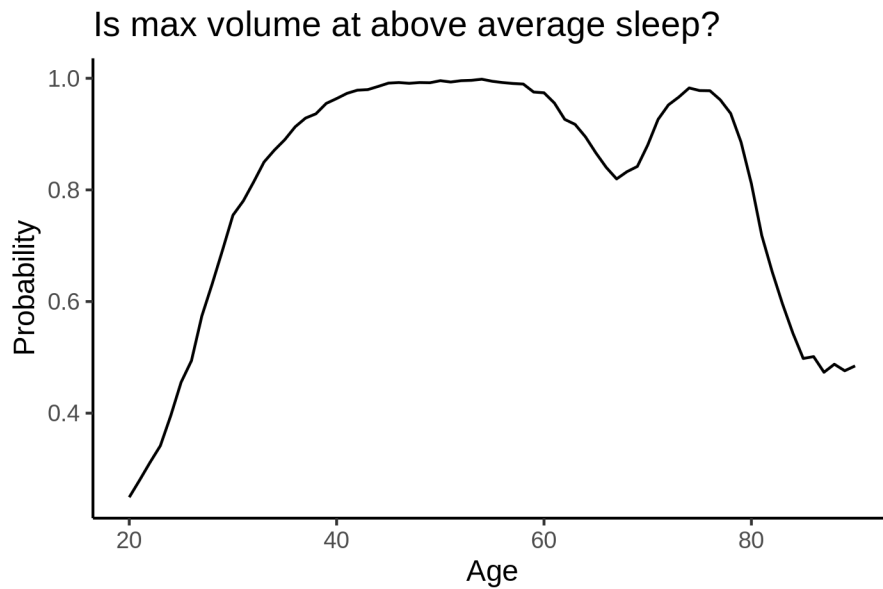

## Controlling for covariates

Below is the output for a model in which we only include data with income and education.

```
##
## Family: gaussian
## Link function: identity
```

```

##
## Formula:
## value ~ sex + site + s(age_z, k = 10, bs = "cr") + s(sleep_z,
##     k = 5, bs = "cr") + icv
## <environment: 0x5589f2747f60>
##
## Parametric coefficients:
##           Estimate Std. Error t value Pr(>|t|)
## (Intercept)  45162.03   1653.54  27.312 < 2e-16 ***
## sexmale      1849.62    180.62  10.240 < 2e-16 ***
## siteousAvanto -13829.90   1826.06  -7.574 3.73e-14 ***
## siteousPrisma -14574.87   1932.56  -7.542 4.76e-14 ***
## siteousSkyra  -9655.39   1785.28  -5.408 6.41e-08 ***
## siteUKB      -14334.03   1649.32  -8.691 < 2e-16 ***
## siteUOXF     -8985.34   1858.24  -4.835 1.34e-06 ***
## icv          6377.54    90.86   70.192 < 2e-16 ***
## ---
## Signif. codes:  0 '***' 0.001 '**' 0.01 '*' 0.05 '.' 0.1 ' ' 1
##
## Approximate significance of smooth terms:
##           edf Ref.df      F p-value
## s(age_z)   7.878  7.878 1519.6 <2e-16 ***
## s(sleep_z) 2.225  2.225   2.2  0.141
## ---
## Signif. codes:  0 '***' 0.001 '**' 0.01 '*' 0.05 '.' 0.1 ' ' 1
##
## R-sq.(adj) =  0.378
## lmer.REML = 6.6824e+05  Scale est. = 1.7799e+06  n = 31194

```

Below is the output for a model in which we control for the main effects of income and education.

```

##
## Family: gaussian
## Link function: identity
##
## Formula:
## value ~ sex + site + s(age_z, k = 10, bs = "cr") + s(sleep_z,
##     k = 5, bs = "cr") + icv + income_scaled + education_scaled
## <environment: 0x5589f2747f60>
##
## Parametric coefficients:
##           Estimate Std. Error t value Pr(>|t|)
## (Intercept)  44674.19   1662.77  26.867 < 2e-16 ***
## sexmale      1889.36    181.07  10.434 < 2e-16 ***
## siteousAvanto -13949.88   1826.27  -7.638 2.26e-14 ***
## siteousPrisma -14655.55   1932.34  -7.584 3.43e-14 ***
## siteousSkyra  -9782.46   1785.46  -5.479 4.31e-08 ***
## siteUKB      -14503.28   1649.78  -8.791 < 2e-16 ***
## siteUOXF     -8908.30   1858.61  -4.793 1.65e-06 ***
## icv          6351.06    91.53   69.386 < 2e-16 ***
## income_scaled  -237.23    215.00  -1.103 0.269877
## education_scaled  960.39    256.99   3.737 0.000186 ***
## ---
## Signif. codes:  0 '***' 0.001 '**' 0.01 '*' 0.05 '.' 0.1 ' ' 1
##

```

```

## Approximate significance of smooth terms:
##           edf Ref.df      F p-value
## s(age_z)  7.878  7.878 1425.37 <2e-16 ***
## s(sleep_z) 2.302  2.302   2.39  0.122
## ---
## Signif. codes:  0 '***' 0.001 '**' 0.01 '*' 0.05 '.' 0.1 ' ' 1
##
## R-sq.(adj) =  0.379
## lmer.REML = 6.682e+05  Scale est. = 1.7793e+06  n = 31194

```

We also included interaction effects between sleep duration and education and income, in another model. The output is shown below, and the interaction terms are `income_scaled:sleep_z` and `education_scaled:sleep_z`.

```

##
## Family: gaussian
## Link function: identity
##
## Formula:
## value ~ sex + site + s(age_z, k = 10, bs = "cr") + s(sleep_z,
##           k = 5, bs = "cr") + icv + income_scaled + education_scaled +
##           income_scaled:sleep_z + education_scaled:sleep_z
## <environment: 0x5589f2747f60>
##
## Parametric coefficients:
##           Estimate Std. Error t value Pr(>|t|)
## (Intercept)      44638.20   1662.85  26.844 < 2e-16 ***
## sexmale           1898.12    181.20  10.476 < 2e-16 ***
## siteousAvanto    -13918.82   1826.28  -7.621 2.58e-14 ***
## siteousPrisma   -14610.13   1932.43  -7.561 4.13e-14 ***
## siteousSkyra     -9752.30   1785.46  -5.462 4.74e-08 ***
## siteUKB         -14461.88   1649.90  -8.765 < 2e-16 ***
## siteUOXF        -8845.63   1859.07  -4.758 1.96e-06 ***
## icv              6348.79    91.54   69.356 < 2e-16 ***
## income_scaled    -244.14    215.11  -1.135 0.256405
## education_scaled  968.16    257.02   3.767 0.000166 ***
## income_scaled:sleep_z 156.86    216.18   0.726 0.468088
## education_scaled:sleep_z -482.09    249.34  -1.933 0.053193 .
## ---
## Signif. codes:  0 '***' 0.001 '**' 0.01 '*' 0.05 '.' 0.1 ' ' 1
##
## Approximate significance of smooth terms:
##           edf Ref.df      F p-value
## s(age_z)  7.877  7.877 1424.477 <2e-16 ***
## s(sleep_z) 2.361  2.361   3.619  0.0355 *
## ---
## Signif. codes:  0 '***' 0.001 '**' 0.01 '*' 0.05 '.' 0.1 ' ' 1
##
## R-sq.(adj) =  0.379
## lmer.REML = 6.6817e+05  Scale est. = 1.7793e+06  n = 31194

```

We did the same controlling for BMI. Below is the model with no covariates but only keeping data with BMI.

```

##
## Family: gaussian
## Link function: identity

```

```

##
## Formula:
## value ~ sex + site + s(age_z, k = 10, bs = "cr") + s(sleep_z,
##     k = 5, bs = "cr") + icv
## <environment: 0x558ad9d536b0>
##
## Parametric coefficients:
##           Estimate Std. Error t value Pr(>|t|)
## (Intercept) 31523.00    773.72  40.742 < 2e-16 ***
## sexmale     1807.60    175.33  10.309 < 2e-16 ***
## siteousPrisma -103.29   909.13  -0.114  0.910
## siteousSkyra 4074.79   365.77  11.140 < 2e-16 ***
## siteUCAM     -601.01   881.36  -0.682  0.495
## siteUKB      -752.41   784.06  -0.960  0.337
## siteUmU      4712.91  1074.07   4.388 1.15e-05 ***
## icv          6429.37    88.61  72.561 < 2e-16 ***
## ---
## Signif. codes:  0 '***' 0.001 '**' 0.01 '*' 0.05 '.' 0.1 ' ' 1
##
## Approximate significance of smooth terms:
##           edf Ref.df      F p-value
## s(age_z)   8.056  8.056 1670.639 <2e-16 ***
## s(sleep_z) 2.462  2.462   1.985  0.0776 .
## ---
## Signif. codes:  0 '***' 0.001 '**' 0.01 '*' 0.05 '.' 0.1 ' ' 1
##
## R-sq.(adj) =  0.383
## lmer.REML = 7.1575e+05  Scale est. = 1.8476e+06  n = 33446

```

Below is the model output with main effect.

```

##
## Family: gaussian
## Link function: identity
##
## Formula:
## value ~ sex + site + s(age_z, k = 10, bs = "cr") + s(sleep_z,
##     k = 5, bs = "cr") + icv + bmi
## <environment: 0x558ad9d536b0>
##
## Parametric coefficients:
##           Estimate Std. Error t value Pr(>|t|)
## (Intercept) 30016.64    885.63  33.893 < 2e-16 ***
## sexmale     1759.31    175.85  10.005 < 2e-16 ***
## siteousPrisma -121.22   908.98  -0.133 0.893908
## siteousSkyra 4074.48   365.70  11.142 < 2e-16 ***
## siteUCAM     -637.63   881.28  -0.724 0.469363
## siteUKB      -815.78   784.13  -1.040 0.298178
## siteUmU      4638.68  1074.12   4.319 1.57e-05 ***
## icv          6420.30    88.62  72.445 < 2e-16 ***
## bmi          60.35     17.26   3.496 0.000472 ***
## ---
## Signif. codes:  0 '***' 0.001 '**' 0.01 '*' 0.05 '.' 0.1 ' ' 1
##
## Approximate significance of smooth terms:

```

```

##           edf Ref.df       F p-value
## s(age_z)   8.060  8.060 1671.561 <2e-16 ***
## s(sleep_z) 2.302  2.302   1.944 0.0932 .
## ---
## Signif. codes:  0 '***' 0.001 '**' 0.01 '*' 0.05 '.' 0.1 ' ' 1
##
## R-sq.(adj) =  0.383
## lmer.REML = 7.1573e+05  Scale est. = 1.8469e+06  n = 33446

```

Next is the model with BMI-sleep interaction.

```

##
## Family: gaussian
## Link function: identity
##
## Formula:
## value ~ sex + site + s(age_z, k = 10, bs = "cr") + s(sleep_z,
##           k = 5, bs = "cr") + icv + bmi + bmi:sleep_z
## <environment: 0x558ad9d536b0>
##
## Parametric coefficients:
##           Estimate Std. Error t value Pr(>|t|)
## (Intercept) 29921.50    886.18  33.764 < 2e-16 ***
## sexmale      1761.28    175.83  10.017 < 2e-16 ***
## siteousPrisma -120.80    908.97  -0.133 0.894274
## siteousSkyra  4078.44    365.72  11.152 < 2e-16 ***
## siteUCAM     -607.91    881.27  -0.690 0.490315
## siteUKB      -789.31    784.14  -1.007 0.314137
## siteUmU      4661.36   1074.05   4.340 1.43e-05 ***
## icv          6422.04    88.61  72.472 < 2e-16 ***
## bmi           62.08     17.27   3.595 0.000325 ***
## bmi:sleep_z   46.45     16.36   2.839 0.004526 **
## ---
## Signif. codes:  0 '***' 0.001 '**' 0.01 '*' 0.05 '.' 0.1 ' ' 1
##
## Approximate significance of smooth terms:
##           edf Ref.df       F p-value
## s(age_z)   8.060  8.060 1670.285 < 2e-16 ***
## s(sleep_z) 2.253  2.253   4.127 0.00951 **
## ---
## Signif. codes:  0 '***' 0.001 '**' 0.01 '*' 0.05 '.' 0.1 ' ' 1
##
## R-sq.(adj) =  0.384
## lmer.REML = 7.1572e+05  Scale est. = 1.8471e+06  n = 33446

```

We did the same controlling for depression. Below is the model with no covariates but only keeping data with depression.

```

##
## Family: gaussian
## Link function: identity
##
## Formula:
## value ~ sex + site + s(age_z, k = 10, bs = "cr") + s(sleep_z,
##           k = 5, bs = "cr") + icv
## <environment: 0x558ad797ced8>

```

```

##
## Parametric coefficients:
##           Estimate Std. Error t value Pr(>|t|)
## (Intercept)  42470.07    855.21  49.660 < 2e-16 ***
## sexmale      1732.95     176.32   9.828 < 2e-16 ***
## siteousAvanto -10141.60   1332.35  -7.612 2.77e-14 ***
## siteousPrisma -8964.20    1419.68  -6.314 2.75e-10 ***
## siteousSkyra  -6026.97    1200.89  -5.019 5.23e-07 ***
## siteUCAM     -10479.83    1162.79  -9.013 < 2e-16 ***
## siteUKB      -11575.50    846.22  -13.679 < 2e-16 ***
## siteUmU      -6117.45    1143.76  -5.349 8.92e-08 ***
## icv          6501.23     89.03   73.019 < 2e-16 ***
## ---
## Signif. codes:  0 '***' 0.001 '**' 0.01 '*' 0.05 '.' 0.1 ' ' 1
##
## Approximate significance of smooth terms:
##           edf Ref.df      F p-value
## s(age_z)   7.967  7.967 1667.330 <2e-16 ***
## s(sleep_z) 2.648  2.648   4.306  0.0274 *
## ---
## Signif. codes:  0 '***' 0.001 '**' 0.01 '*' 0.05 '.' 0.1 ' ' 1
##
## R-sq.(adj) =  0.384
## lmer.REML = 7.1363e+05 Scale est. = 1.9e+06   n = 33360

```

Below is the model output with main effect.

```

##
## Family: gaussian
## Link function: identity
##
## Formula:
## value ~ sex + site + s(age_z, k = 10, bs = "cr") + s(sleep_z,
##           k = 5, bs = "cr") + icv + depression
## <environment: 0x558ad797ced8>
##
## Parametric coefficients:
##           Estimate Std. Error t value Pr(>|t|)
## (Intercept)  42156.19    858.47  49.106 < 2e-16 ***
## sexmale      1767.78     176.48  10.017 < 2e-16 ***
## siteousAvanto -10318.68   1332.64  -7.743 9.98e-15 ***
## siteousPrisma -9140.39    1419.91  -6.437 1.23e-10 ***
## siteousSkyra  -6220.40    1201.48  -5.177 2.26e-07 ***
## siteUCAM     -10565.75    1162.74  -9.087 < 2e-16 ***
## siteUKB      -11452.13    846.59  -13.527 < 2e-16 ***
## siteUmU      -7104.05    1167.91  -6.083 1.19e-09 ***
## icv          6496.31     89.01   72.982 < 2e-16 ***
## depression   2635.56     634.78   4.152 3.31e-05 ***
## ---
## Signif. codes:  0 '***' 0.001 '**' 0.01 '*' 0.05 '.' 0.1 ' ' 1
##
## Approximate significance of smooth terms:
##           edf Ref.df      F p-value
## s(age_z)   7.965  7.965 1661.722 <2e-16 ***
## s(sleep_z) 2.323  2.323   3.537  0.0444 *

```

```
## ---
## Signif. codes:  0 '***' 0.001 '**' 0.01 '*' 0.05 '.' 0.1 ' ' 1
##
## R-sq.(adj) =  0.384
## lmer.REML = 7.1359e+05  Scale est. = 1.898e+06  n = 33360
```

Next is the model with depression-sleep interaction.

```
##
## Family: gaussian
## Link function: identity
##
## Formula:
## value ~ sex + site + s(age_z, k = 10, bs = "cr") + s(sleep_z,
##       k = 5, bs = "cr") + icv + depression + depression:sleep_z
## <environment: 0x558ad797ced8>
##
## Parametric coefficients:
##              Estimate Std. Error t value Pr(>|t|)
## (Intercept)    42157.5     858.4  49.113 < 2e-16 ***
## sexmale         1777.0     176.5  10.068 < 2e-16 ***
## siteousAvanto  -10271.2    1332.6  -7.707 1.32e-14 ***
## siteousPrisma  -9093.1    1419.9  -6.404 1.53e-10 ***
## siteousSkyra   -6175.4    1201.5  -5.140 2.77e-07 ***
## siteUCAM       -10503.1    1162.8  -9.032 < 2e-16 ***
## siteUKB        -11457.4     846.5 -13.535 < 2e-16 ***
## siteUmU        -7529.6    1177.6  -6.394 1.64e-10 ***
## icv             6495.2     89.0  72.979 < 2e-16 ***
## depression      2751.2     635.5   4.329 1.50e-05 ***
## depression:sleep_z 1293.8     466.6   2.773 0.00556 **
## ---
## Signif. codes:  0 '***' 0.001 '**' 0.01 '*' 0.05 '.' 0.1 ' ' 1
##
## Approximate significance of smooth terms:
##              edf Ref.df      F p-value
## s(age_z)     7.964  7.964 1663.00 <2e-16 ***
## s(sleep_z)   2.183  2.183   1.82  0.195
## ---
## Signif. codes:  0 '***' 0.001 '**' 0.01 '*' 0.05 '.' 0.1 ' ' 1
##
## R-sq.(adj) =  0.384
## lmer.REML = 7.1357e+05  Scale est. = 1.8979e+06  n = 33360
```

The plot below shows the sleep-volume curve for the original model and for the model with main effects of SES.

Ventricles sleep effect, covariates

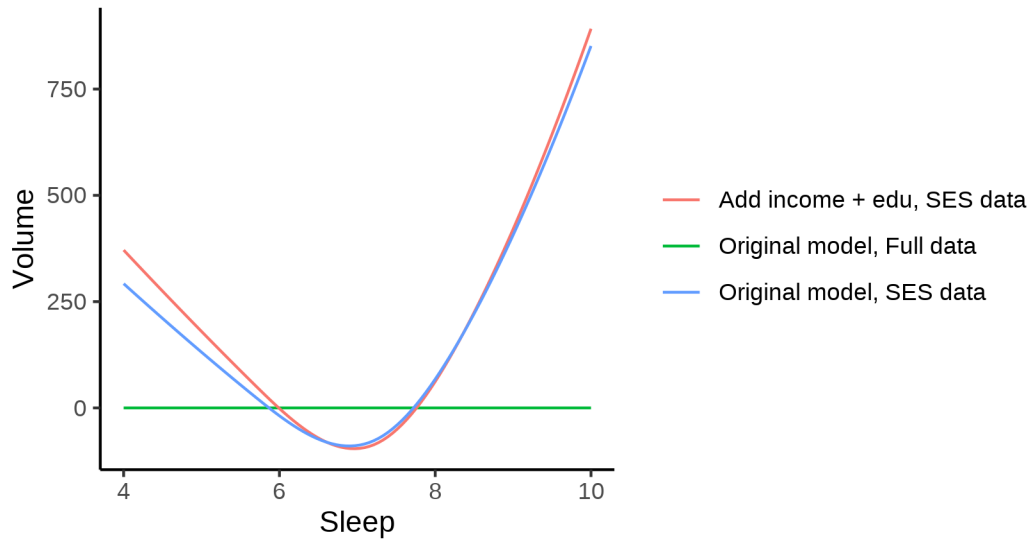

The plot below shows the sleep-volume curve for the original model and for the model with main effects of BMI.

Ventricles sleep effect, covariates

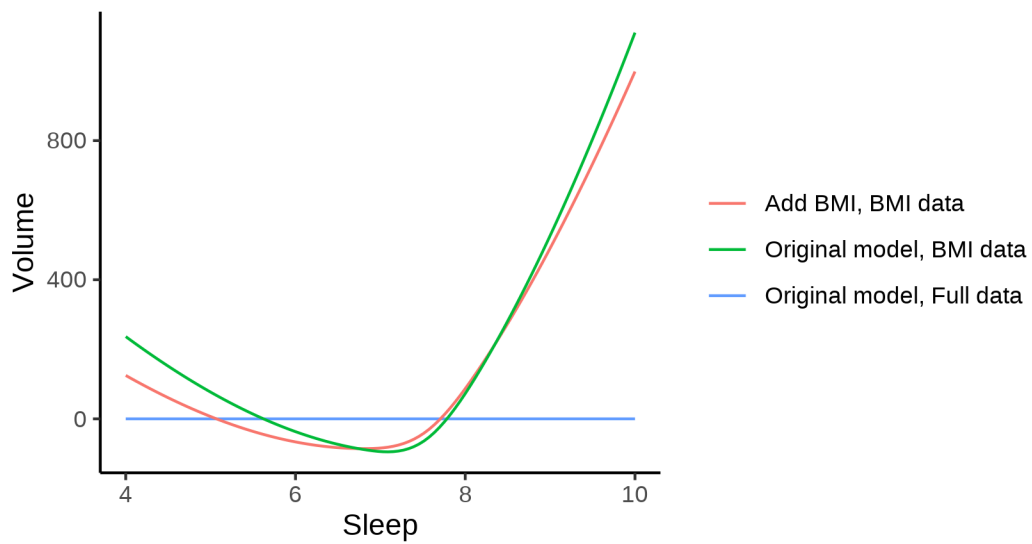

The plot below shows the sleep-volume curve for the original model and for the model with main effects of depression.



## Ventricles sleep effect, covariates

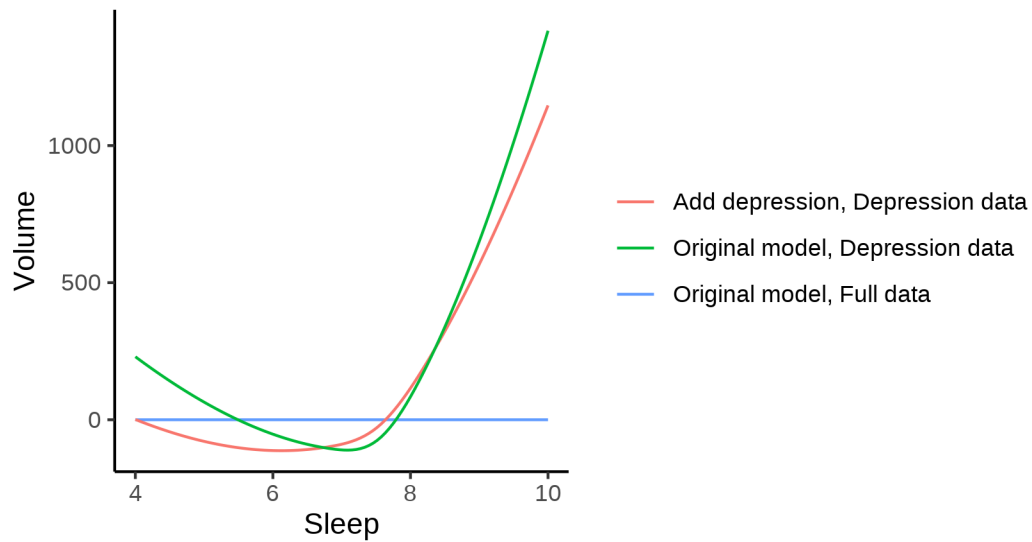

## Models Not controlling for ICV

### Model outputs

Model without sleep term

```
##
## Family: gaussian
## Link function: identity
##
## Formula:
## value ~ sex + site + s(age_z, k = 10, bs = "cr")
## <environment: 0x55896133b770>
##
## Parametric coefficients:
##              Estimate Std. Error t value Pr(>|t|)
## (Intercept)  27453.18   632.21  43.424 < 2e-16 ***
## sexmale      8933.36    126.66  70.529 < 2e-16 ***
## siteMPIB     1594.29    899.98   1.771 0.076490 .
## siteousAvanto 3418.00    694.18   4.924 8.51e-07 ***
## siteousPrisma 3778.21   1015.66   3.720 0.000199 ***
## siteousSkyra  4700.19    692.62   6.786 1.16e-11 ***
## siteUB       -2587.40   2267.02  -1.141 0.253741
## siteUCAM      740.96    776.16   0.955 0.339757
## siteUKB        1.39    645.70   0.002 0.998282
## siteUmU       2844.61   1015.95   2.800 0.005113 **
## siteUOXF       721.38    812.72   0.888 0.374755
## ---
## Signif. codes:  0 '***' 0.001 '**' 0.01 '*' 0.05 '.' 0.1 ' ' 1
##
## Approximate significance of smooth terms:
##              edf Ref.df   F p-value
## s(age_z)    8.386  8.386 2067 <2e-16 ***
```

```
## ---
## Signif. codes:  0 '***' 0.001 '**' 0.01 '*' 0.05 '.' 0.1 ' ' 1
##
## R-sq.(adj) =  0.286
## lmer.REML = 1.1052e+06  Scale est. = 2.0169e+06  n = 51268
```

Model with only main effects of age and sleep

```
##
## Family: gaussian
## Link function: identity
##
## Formula:
## value ~ sex + site + s(age_z, k = 10, bs = "cr") + s(sleep_z,
##       k = 5, bs = "cr")
## <environment: 0x55896133b770>
```

```
## Parametric coefficients:
##           Estimate Std. Error t value Pr(>|t|)
## (Intercept)  27582.5     632.6  43.601 < 2e-16 ***
## sexmale      8924.5     126.6  70.474 < 2e-16 ***
## siteMPIB     1466.0     900.1   1.629 0.103378
## siteousAvanto 3343.6     694.2   4.817 1.46e-06 ***
## siteousPrisma 3718.5    1015.6   3.661 0.000251 ***
## siteousSkyra  4628.9     692.6   6.684 2.36e-11 ***
## siteUB       -2590.8    2266.4  -1.143 0.252981
## siteUCAM      692.3     776.0   0.892 0.372313
## siteUKB      -129.8     646.1  -0.201 0.840833
## siteUmU       2513.2    1017.7   2.469 0.013537 *
## siteUOXF      684.3     812.6   0.842 0.399754
```

```
## ---
## Signif. codes:  0 '***' 0.001 '**' 0.01 '*' 0.05 '.' 0.1 ' ' 1
##
```

```
## Approximate significance of smooth terms:
##           edf Ref.df      F p-value
## s(age_z)   8.387  8.387 2054.44 < 2e-16 ***
## s(sleep_z) 1.000  1.000   26.33 2.75e-07 ***
```

```
## ---
## Signif. codes:  0 '***' 0.001 '**' 0.01 '*' 0.05 '.' 0.1 ' ' 1
##
```

```
## R-sq.(adj) =  0.286
## lmer.REML = 1.1051e+06  Scale est. = 2.0179e+06  n = 51268
```

Model with full interaction between age and sleep

```
##
## Family: gaussian
## Link function: identity
##
## Formula:
## value ~ sex + site + t2(age_z, sleep_z, k = c(10, 4), bs = "cr")
## <environment: 0x55896133b770>
```

```
## Parametric coefficients:
##           Estimate Std. Error t value Pr(>|t|)
## (Intercept)  27664.5     636.6  43.458 < 2e-16 ***
```

```

## sexmale      8951.4      126.9  70.539 < 2e-16 ***
## siteMPIB     1337.8      904.4   1.479  0.13912
## siteousAvanto 3301.1      698.6   4.726  2.3e-06 ***
## siteousPrisma 3617.3     1017.9   3.554  0.00038 ***
## siteousSkyra  4565.0      697.2   6.548  5.9e-11 ***
## siteUB       -2759.1     2268.0  -1.217  0.22379
## siteUCAM      582.5      780.4   0.746  0.45545
## siteUKB       -225.9      650.2  -0.347  0.72826
## siteUmU       2430.8     1020.9   2.381  0.01727 *
## siteUOXF      540.4      816.6   0.662  0.50807
## ---
## Signif. codes:  0 '***' 0.001 '**' 0.01 '*' 0.05 '.' 0.1 ' ' 1
##
## Approximate significance of smooth terms:
##              edf Ref.df    F p-value
## t2(age_z,sleep_z) 15.86  15.86 87.92 <2e-16 ***
## ---
## Signif. codes:  0 '***' 0.001 '**' 0.01 '*' 0.05 '.' 0.1 ' ' 1
##
## R-sq.(adj) =  0.286
## lmer.REML = 1.1051e+06  Scale est. = 2.0061e+06  n = 51268

```

## Model comparison

`mod_no_sleep` refers to model without sleep term, `mod_no_interaction` refers to model with only main effect of sleep, and `mod_full` refers to model with a full interaction between age and sleep. This is a nested model comparison, and the p-value at a given line refers to comparing the model at the line to the model on the line above. Hence, significance implies that the more complicated model is supported on statistical grounds.

To be even more specific, the p-value on the second row tests whether there is an association between sleep and volume. The p-value on the third row tests whether this association depends on age.

```

## Data: NULL
## Models:
## ml$mod_no_sleep$mer: NULL
## ml$mod_no_interaction$mer: NULL
## ml$mod_full$mer: NULL
##
##              npar      AIC      BIC  logLik deviance  Chisq Df Pr(>Chisq)
## ml$mod_no_sleep$mer      15 1105181 1105314 -552575  1105151
## ml$mod_no_interaction$mer  17 1105159 1105309 -552562  1105125 26.3185  2  1.928e-06 ***
## ml$mod_full$mer          19 1105154 1105322 -552558  1105116  8.9767  2   0.01124 *
## ---
## Signif. codes:  0 '***' 0.001 '**' 0.01 '*' 0.05 '.' 0.1 ' ' 1

```

We chose the model based on the likelihood ratio test with 5 % significance level, which was `mod_full`.

## Lifespan brain trajectory

The trajectory shown is from the chosen model `mod_full_no_icv`.

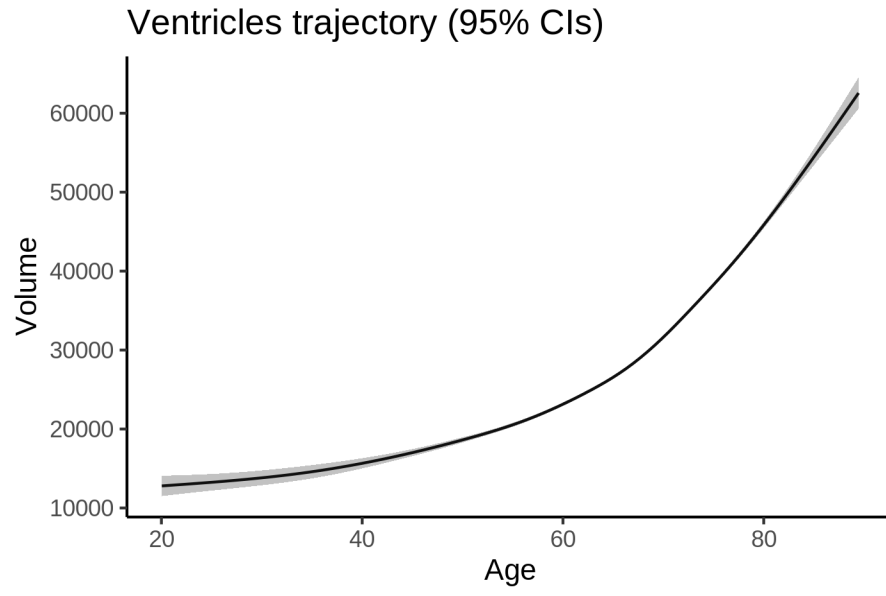

#### Effect of sleep

The chosen model included a full interaction between age and sleep, and the effect of sleep is hence plotted for a set of different ages. For comparability across ages, the sleep-volume curves at each age have been standardized so that they sum to zero.

## Ventricles sleep effect (95% CIs)

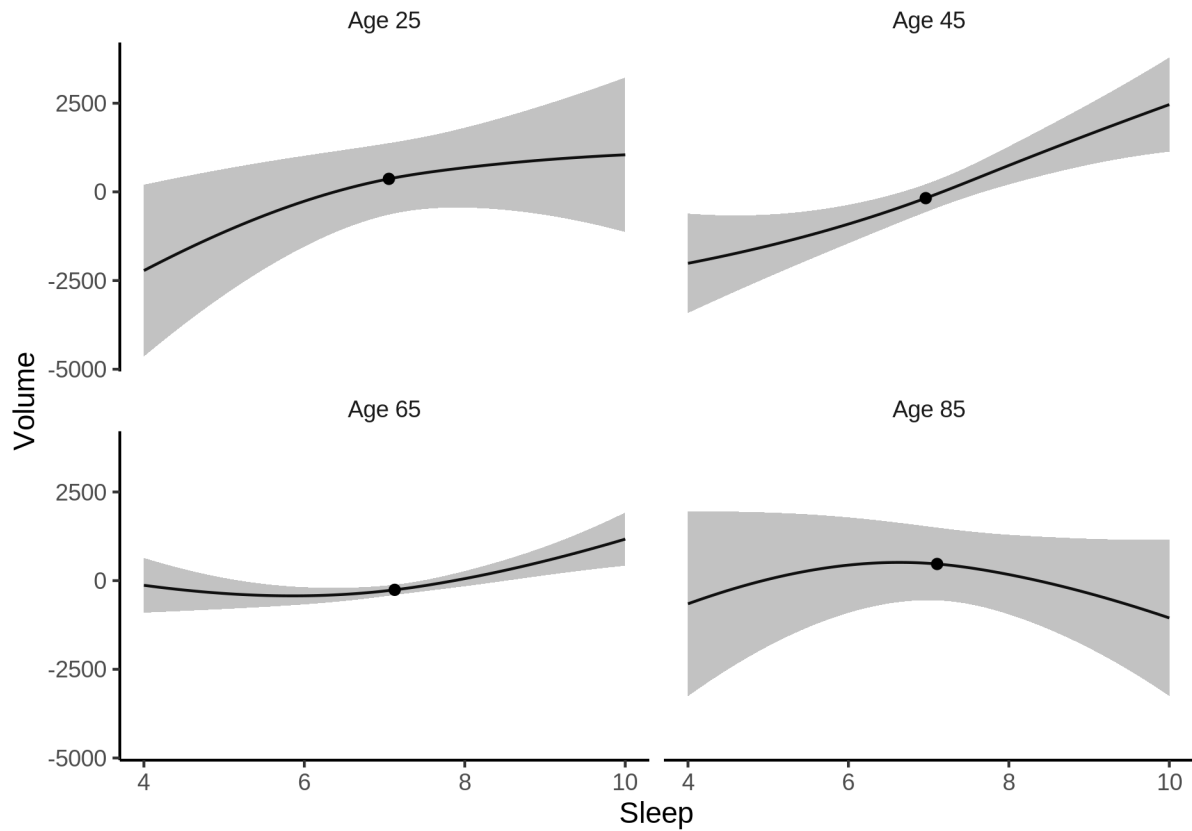

### Deviation from sleep associated with maximal volume

The table show the sleep associated with maximum volume at chosen ages.

| Age | Sleep at max vol |
|-----|------------------|
| 25  | 10.0             |
| 45  | 10.0             |
| 65  | 10.0             |
| 85  | 6.6              |

Model with sleep-age interaction was chosen, so we show it for four selected ages. The percentage values in the plot are calculated as follows: The maximum at 100 % refers to a person at the given age with a sleep duration associated with maximum volume. The other percentage values show how large the expected volume is for someone with other sleep durations. For example, 99 % implies a 1 % reduction.

### Ventricles sleep effect

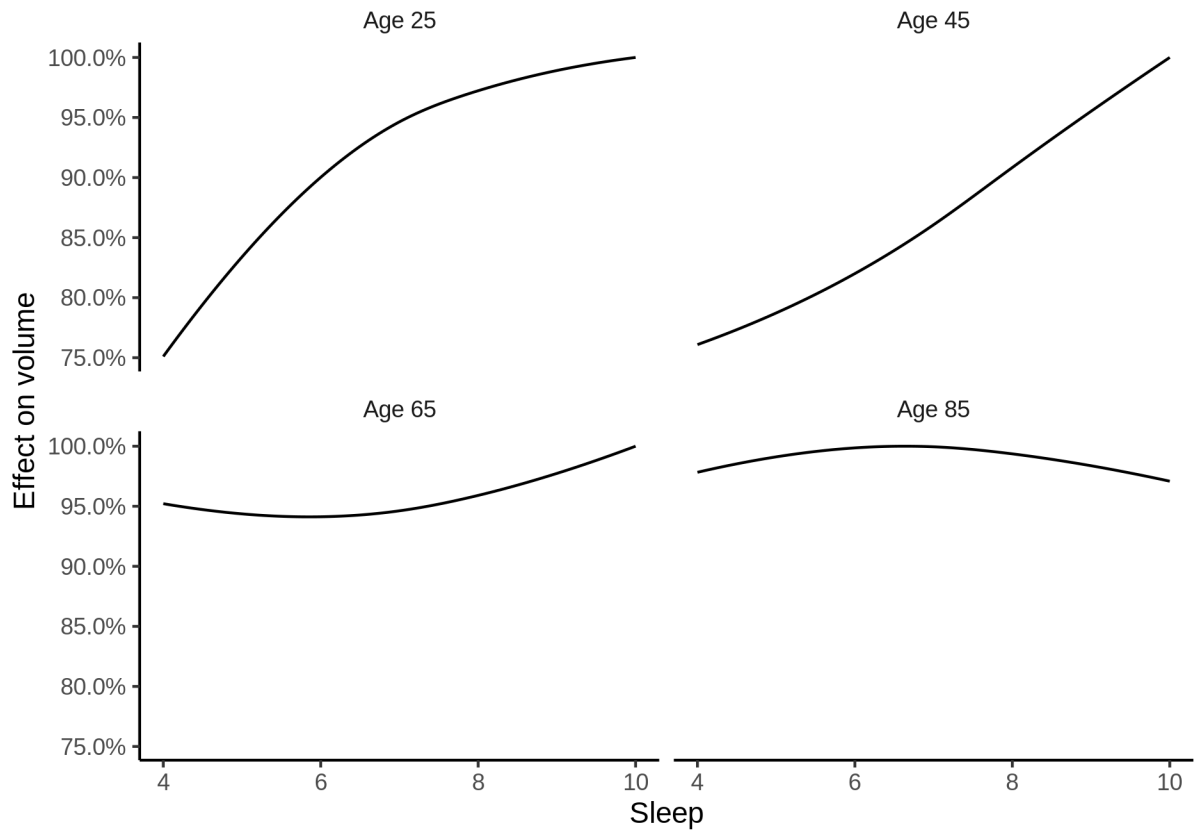

### Comparison of mean sleep and sleep associated with maximum volume

The plot below compares average sleep to the sleep associated with maximum volume.

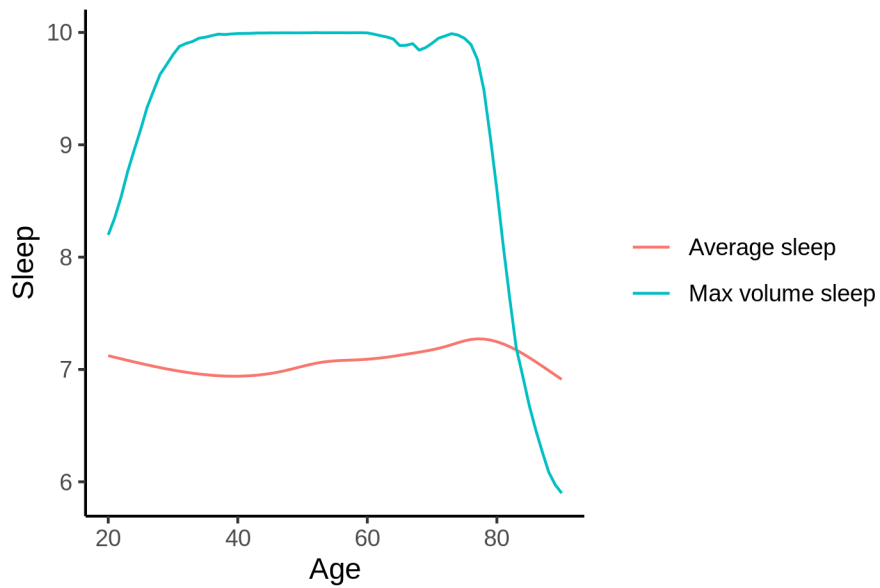

The next plot shows the difference between average sleep and sleep associated with maximum volume. The shaded region is a 95 % confidence interval.

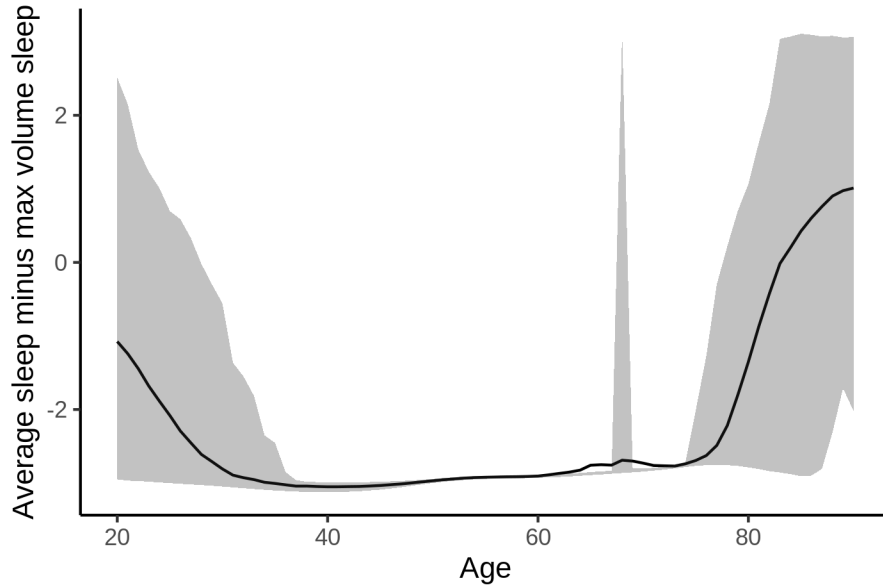

The next plot shows the probability that the sleep duration associated with maximum volume is longer than the average sleep duration, as a function of age. Probability below .05 can be interpreted as evidence that the sleep associated with maximum volume is shorter than the mean sleep, and probability above .95 can be interpreted the opposite way.

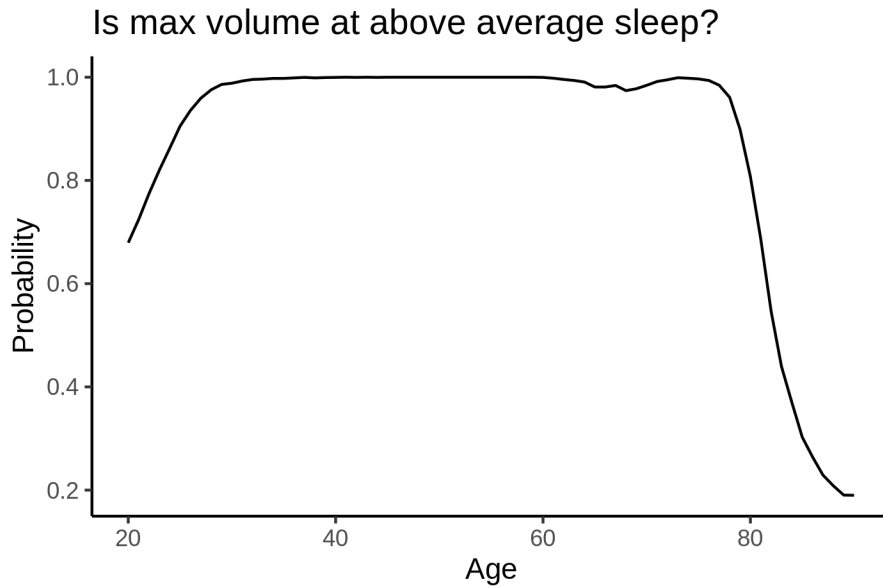

## Summary

The plot below shows estimated sleep at maximum volume and 95 % confidence intervals for selected regions.

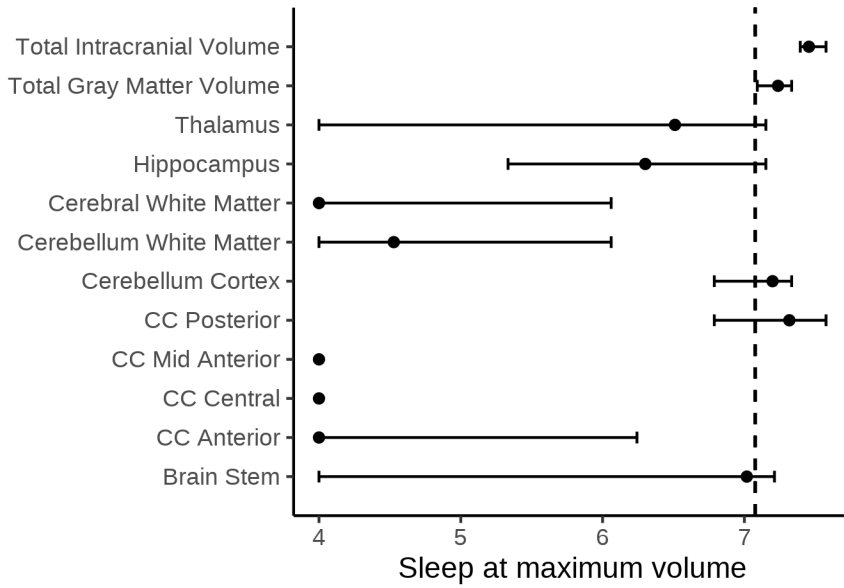

The next plot shows the effect of including sleep quality as covariates in the model.

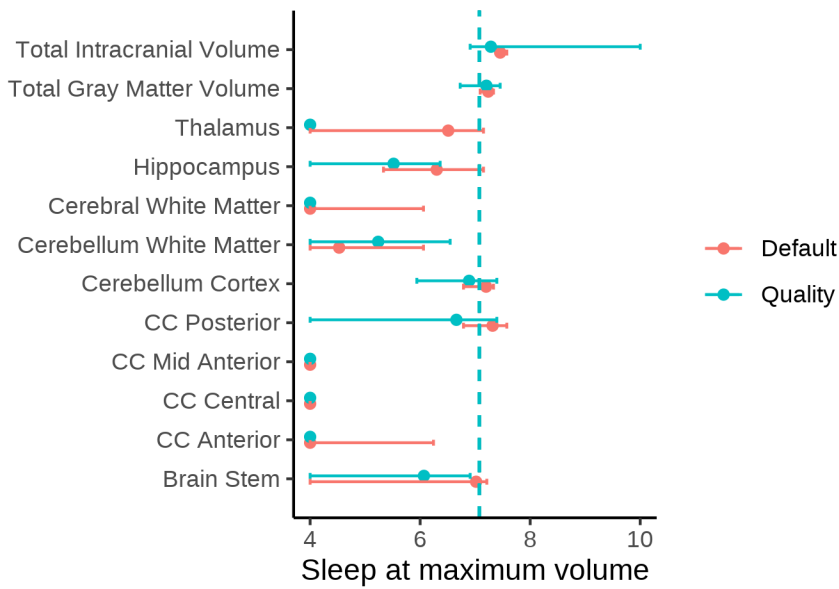

## Multiple comparisons correction

### Models controlling for ICV

We performed correction for multiple comparisons for the main effect of sleep in each of the 19 subcortical regions considered above, using the Benjamini-Hochberg procedure.

The figure below shows a scatter plot of adjusted vs unadjusted p-values.



### BH Adjusted p-values

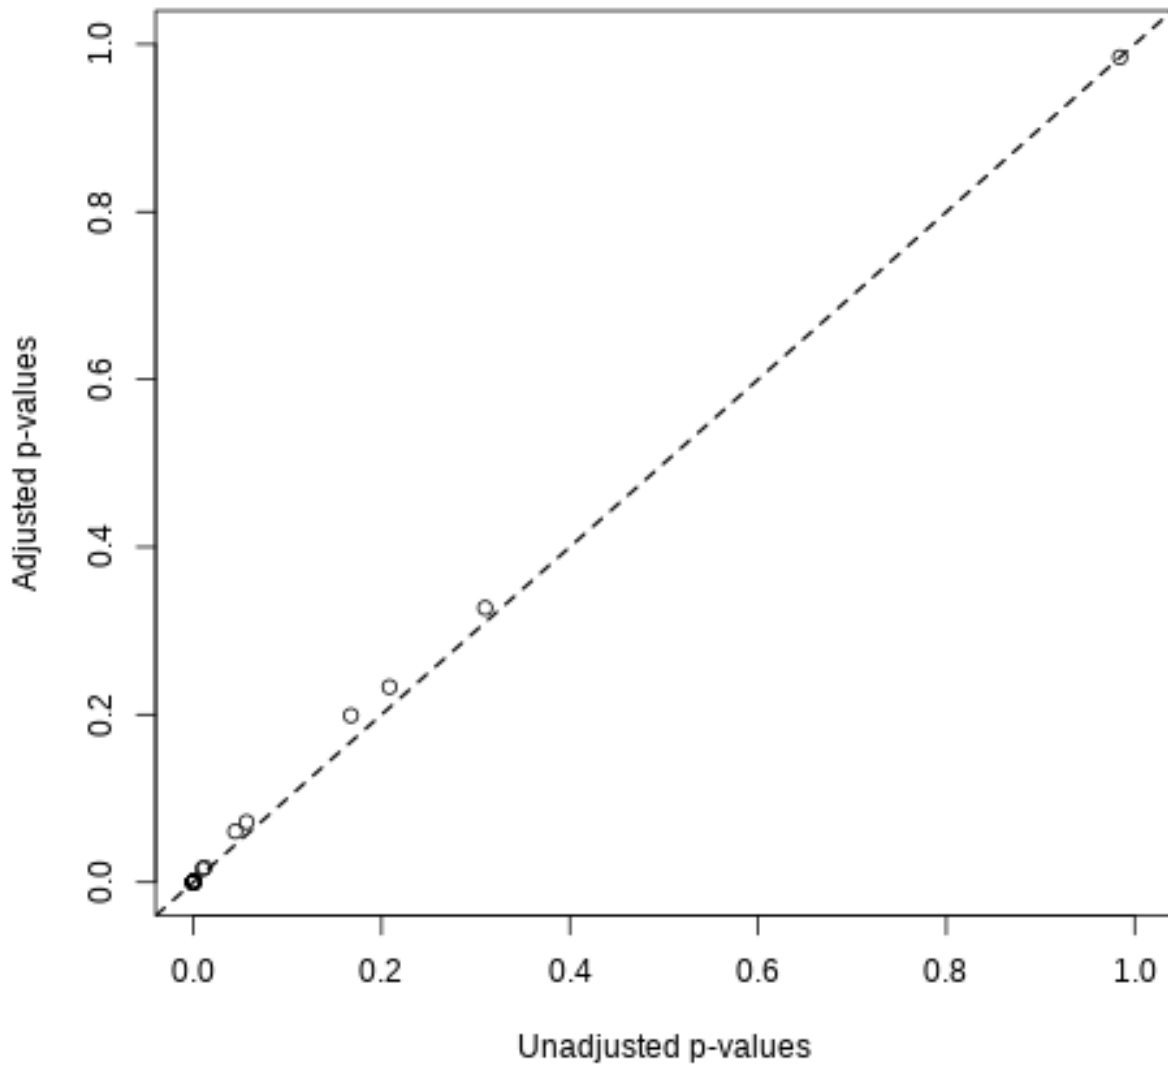

The table below shows the unadjusted and adjusted p-values for the main effect of sleep.

```
##
##
## |region                | Unadjusted p-value| Adjusted p-value|
## |:-----:             |:-----:         |:-----:         |
## |Accumbens-area       | 0.9844851| 0.9844851|
## |Amygdala             | 0.0566558| 0.0717640|
## |Brain-Stem          | 0.0000002| 0.0000008|
## |Caudate              | 0.0446225| 0.0605591|
## |CC_Anterior         | 0.0100563| 0.0159226|
## |CC_Central          | 0.0000362| 0.0000765|
## |CC_Mid_Anterior     | 0.0000024| 0.0000090|
## |CC_Mid_Posterior    | 0.2084835| 0.2330109|
## |CC_Posterior        | 0.0119779| 0.0175062|
```

|    |                               |  |           |           |
|----|-------------------------------|--|-----------|-----------|
| ## | Cerebellum-Cortex             |  | 0.0000142 | 0.0000336 |
| ## | Cerebellum-White-Matter       |  | 0.0000446 | 0.0000848 |
| ## | CerebralWhiteMatterVol        |  | 0.0000045 | 0.0000122 |
| ## | EstimatedTotalIntraCranialVol |  | 0.0000000 | 0.0000000 |
| ## | Hippocampus                   |  | 0.0000000 | 0.0000000 |
| ## | Pallidum                      |  | 0.3100803 | 0.3273070 |
| ## | Putamen                       |  | 0.1675098 | 0.1989179 |
| ## | Thalamus                      |  | 0.0000044 | 0.0000122 |
| ## | TotalGrayVol                  |  | 0.0000000 | 0.0000000 |
| ## | Ventricles                    |  | 0.0009262 | 0.0015998 |

### Models not controlling for ICV

We performed correction for multiple comparisons for the main effect of sleep in each of the 19 subcortical regions considered above, using the Benjamini-Hochberg procedure.

The figure below shows a scatter plot of adjusted vs unadjusted p-values.

### BH Adjusted p-values

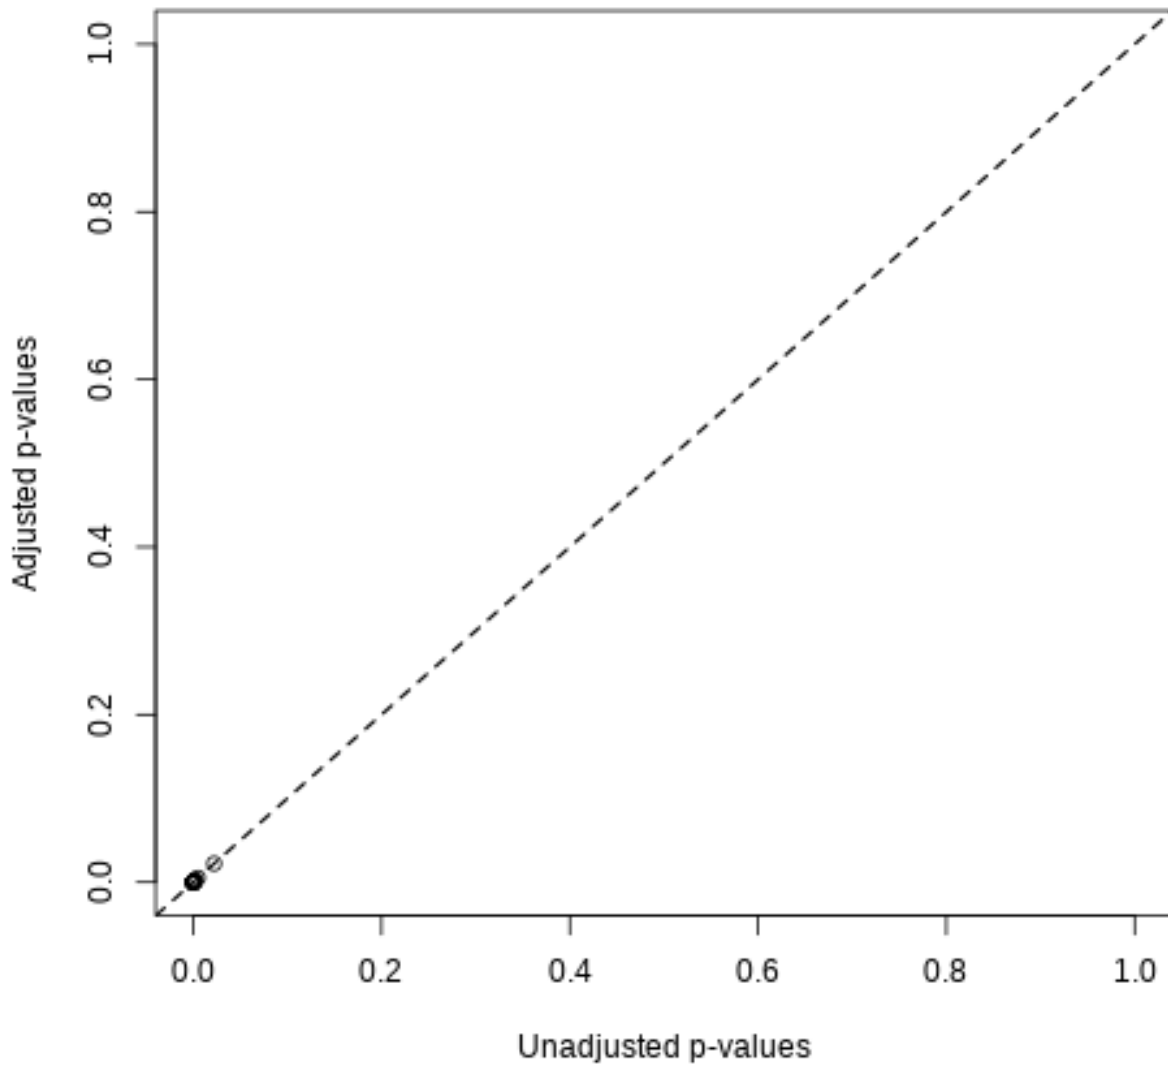

The table below shows the unadjusted and adjusted p-values for the main effect of sleep.

```
##
##
## |region                | Unadjusted p-value| Adjusted p-value|
## |:-----:|:-----:|:-----:|
## |Accumbens-area       | 0.0006969| 0.0009458|
## |Amygdala              | 0.0007790| 0.0009868|
## |Brain-Stem           | 0.0000000| 0.0000000|
## |Caudate               | 0.0000010| 0.0000018|
## |CC_Anterior          | 0.0000087| 0.0000128|
## |CC_Central           | 0.0023553| 0.0026324|
## |CC_Mid_Anterior      | 0.0012699| 0.0015080|
## |CC_Mid_Posterior     | 0.0050213| 0.0053003|
## |CC_Posterior         | 0.0000000| 0.0000000|
```

|    |                               |  |           |           |
|----|-------------------------------|--|-----------|-----------|
| ## | Cerebellum-Cortex             |  | 0.0000000 | 0.0000000 |
| ## | Cerebellum-White-Matter       |  | 0.0000019 | 0.0000029 |
| ## | CerebralWhiteMatterVol        |  | 0.0000000 | 0.0000000 |
| ## | EstimatedTotalIntraCranialVol |  | 0.0000000 | 0.0000000 |
| ## | Hippocampus                   |  | 0.0000000 | 0.0000000 |
| ## | Pallidum                      |  | 0.0000002 | 0.0000003 |
| ## | Putamen                       |  | 0.0222175 | 0.0222175 |
| ## | Thalamus                      |  | 0.0000000 | 0.0000000 |
| ## | TotalGrayVol                  |  | 0.0000000 | 0.0000000 |
| ## | Ventricles                    |  | 0.0000003 | 0.0000005 |

## More details on covariates

### Raw data

#### UKB

For the UKB, we used the income in US dollars. The distribution of this variable is shown in the histogram below.

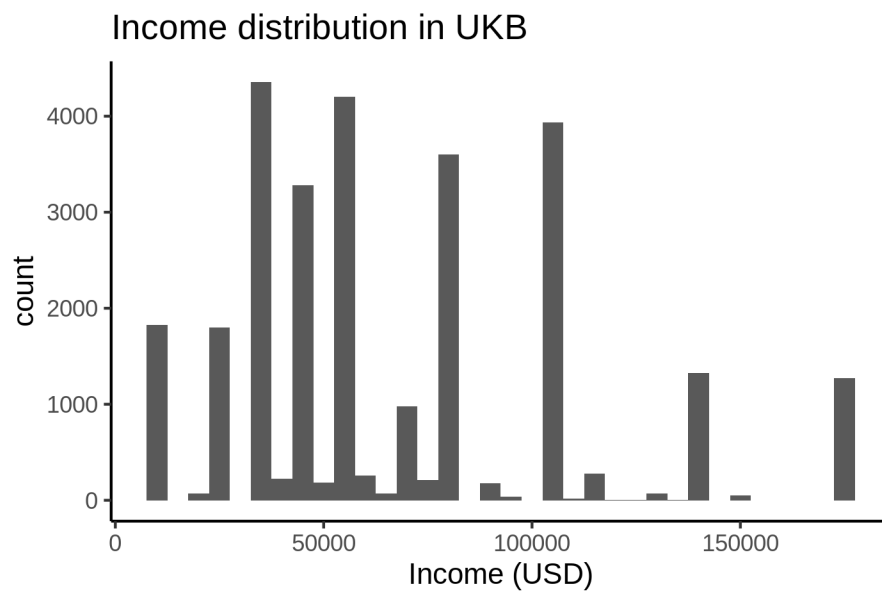

Education took four different categorical values in UKB, shown below.

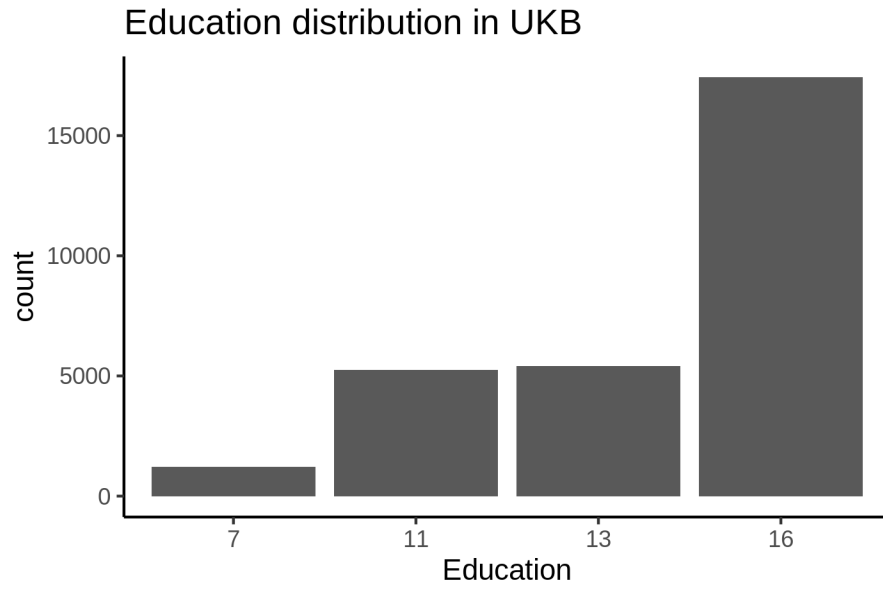

BMI distribution is shown below.

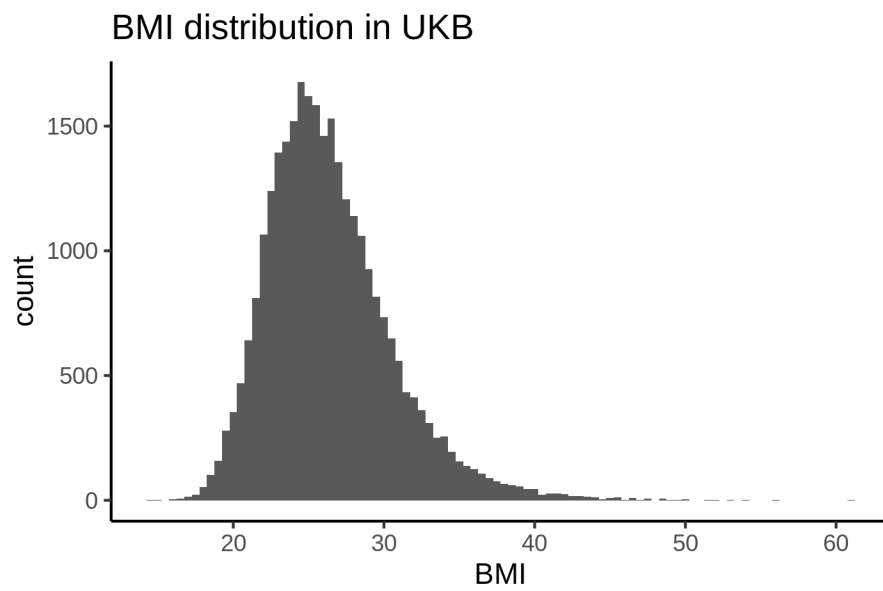

Depression distribution is shown below. This is based on the first principal component of depression covariates.

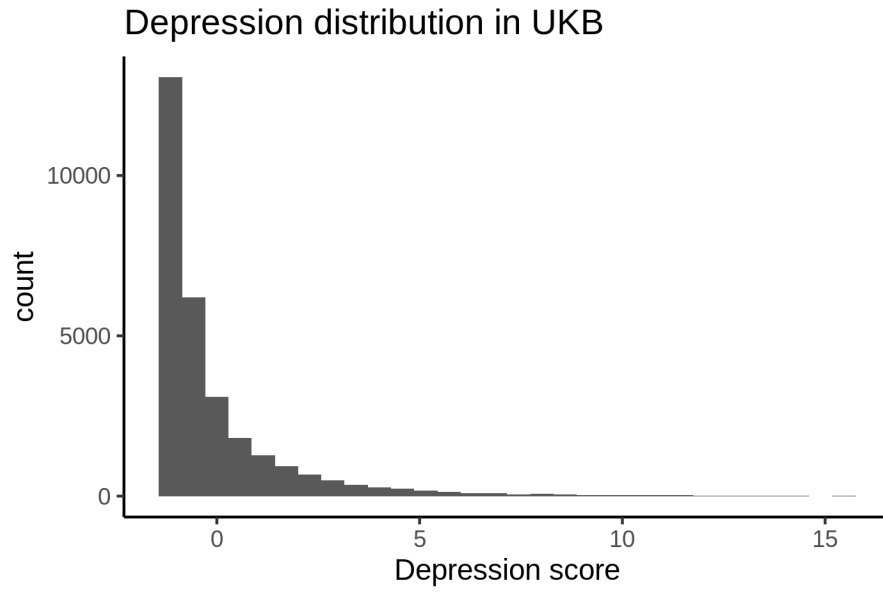

**BASEII**

Income is taken from the variable named “pnett,” which measures monthly income after tax.

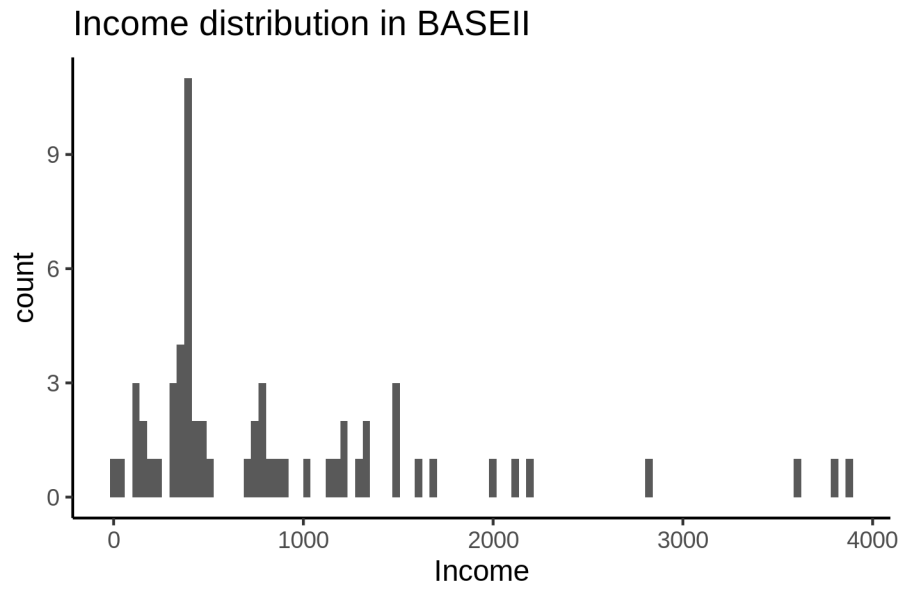

Education distribution in BASEII

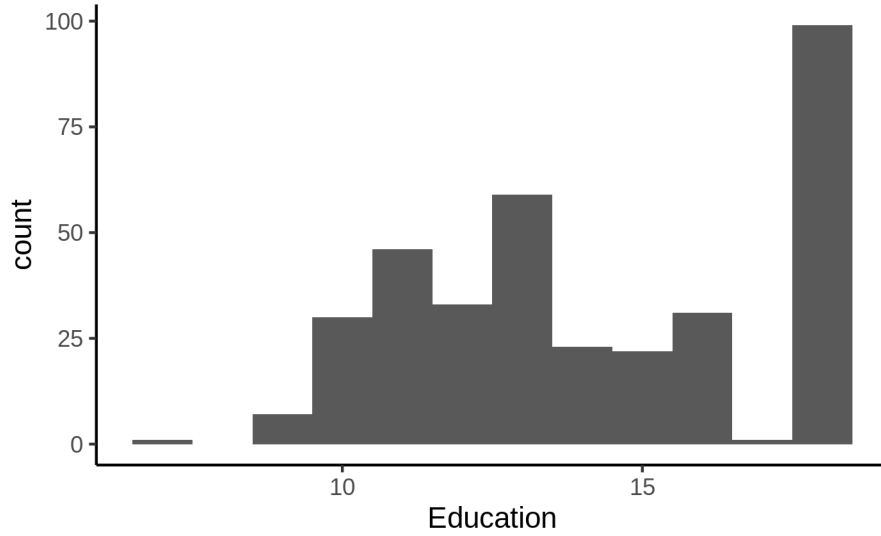

We did not have BMI information in BASEII. Depression scores are shown below.

Depression score in BASEII sample

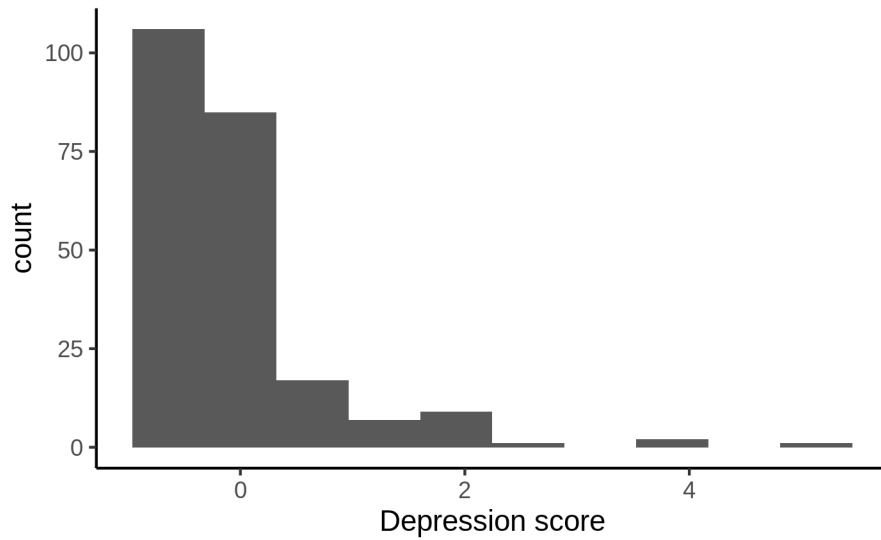

### Betula

We did not have identifiable education and income variables for Betula, as they were anonymized. We did however have BMI and depression.

BMI distribution in Betula sample

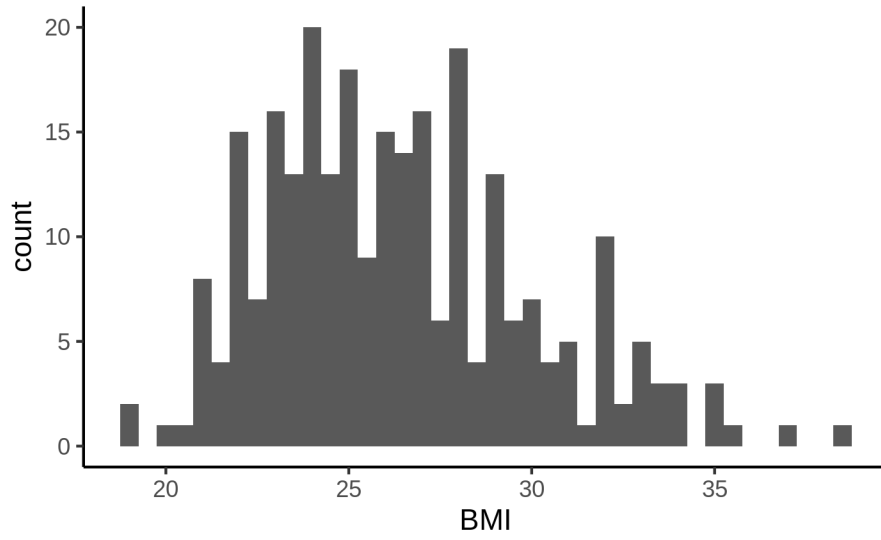

Depression score in Betula sample

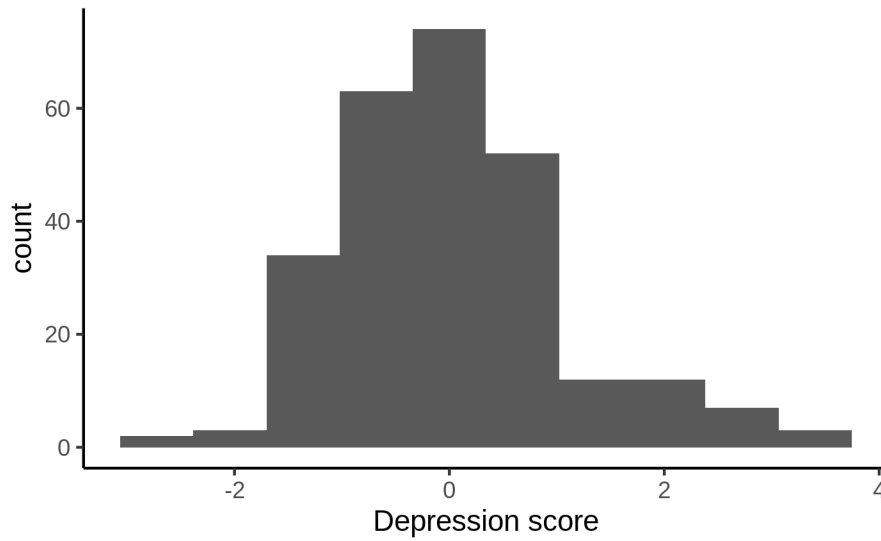

**Cam-CAN**

The income is household income.



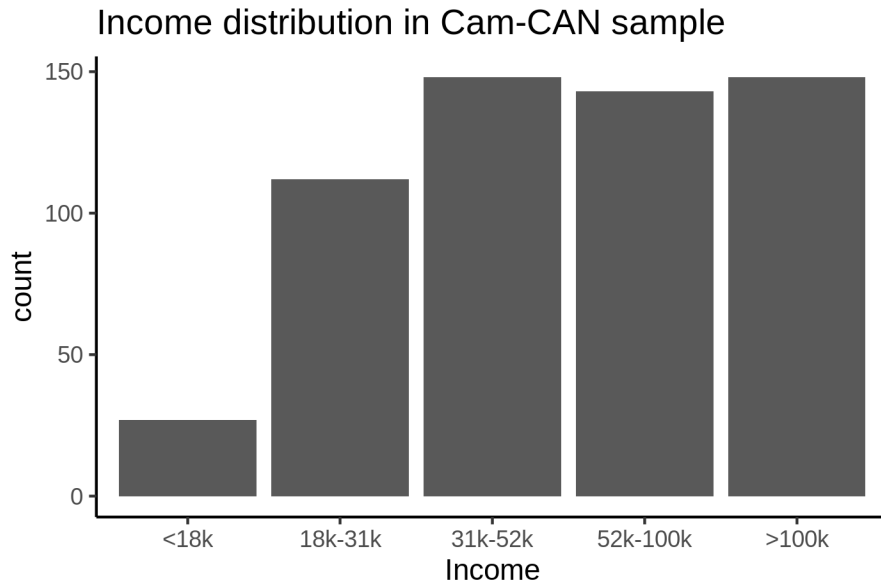

Age at completed education is shown below. The outlier with age above 50 should probably be removed.

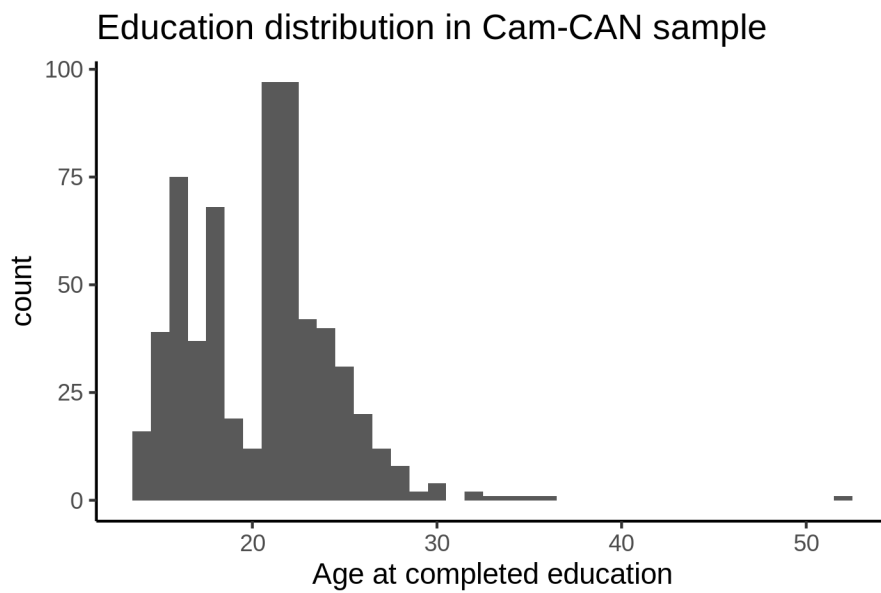

BMI distribution is shown below.

BMI distribution in Cam-CAN sample

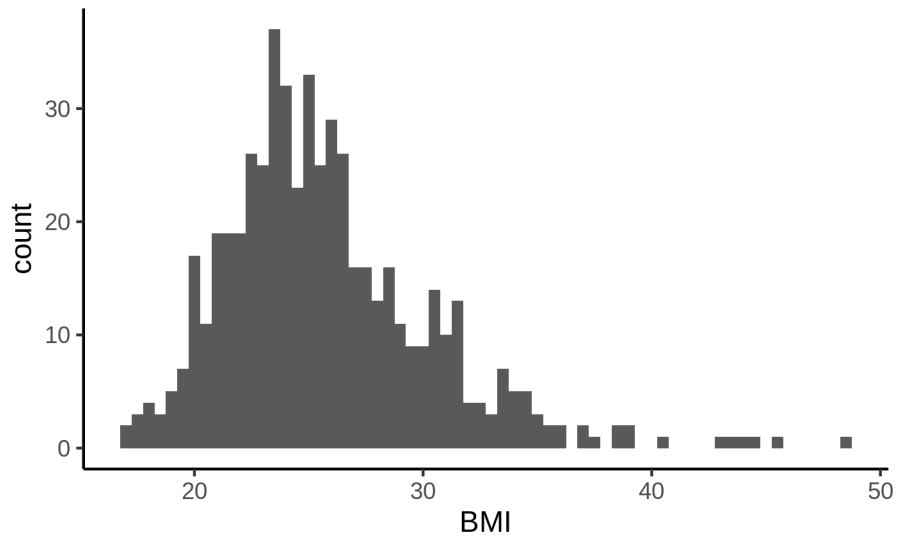

Depression score in Cam-CAN sample

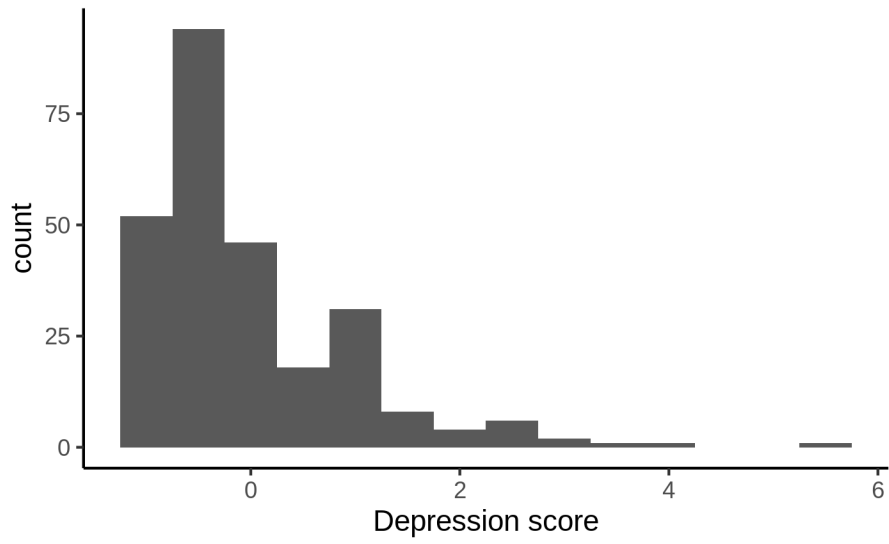

## LCBC

### Income distribution in LCBC sample

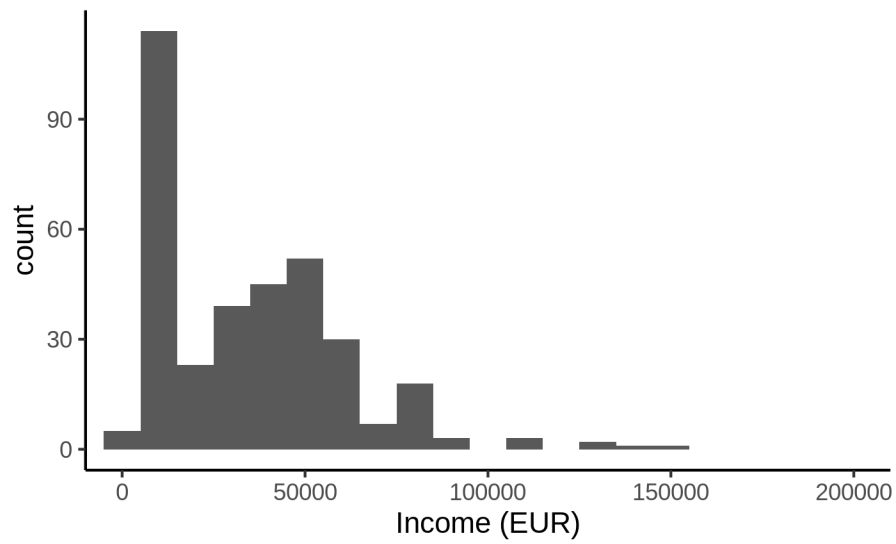

### Education distribution in LCBC sample

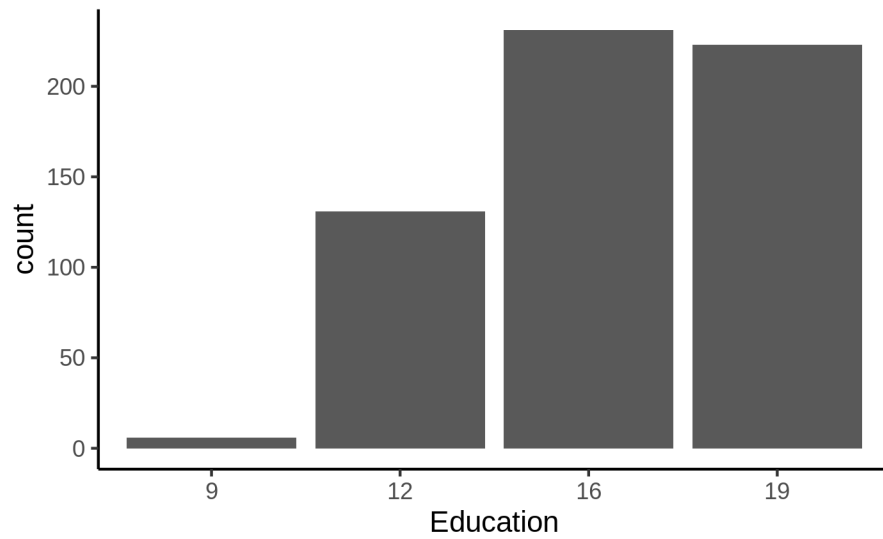

BMI distribution in LCBC sample

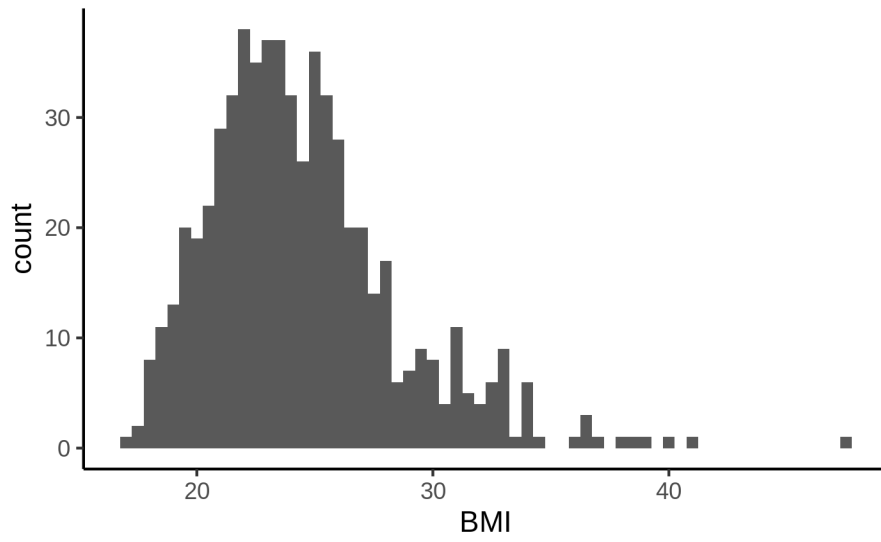

Depression score in LCBC sample

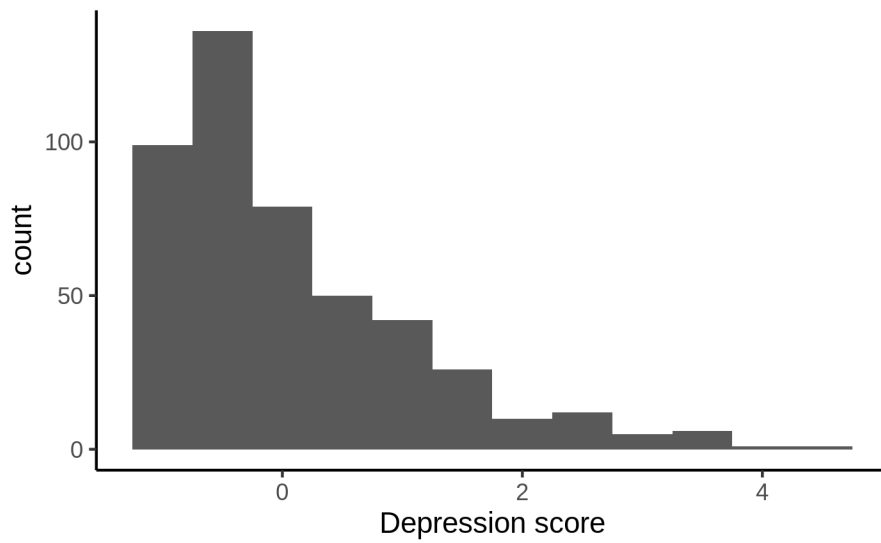

**Oxford**

Household income is on a ten-point categorical scale, cf. supplementary material to SES paper.

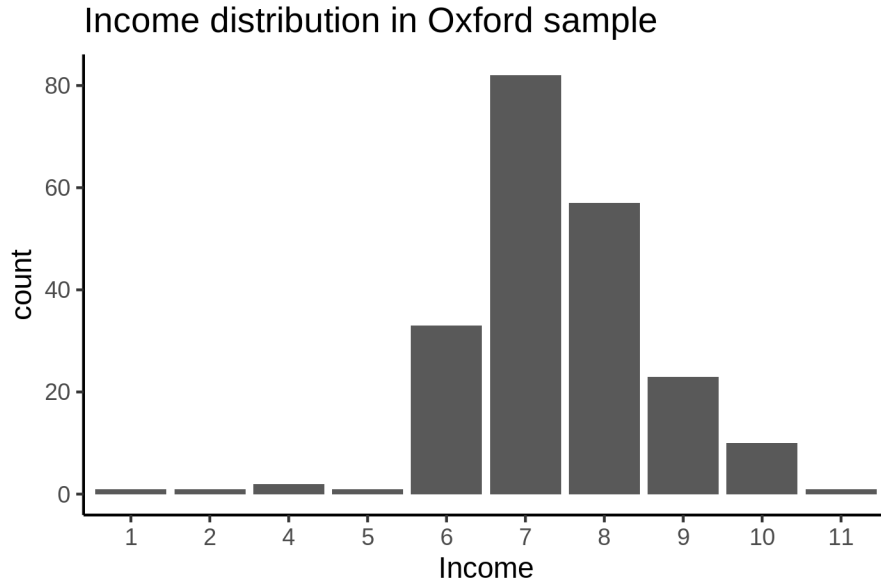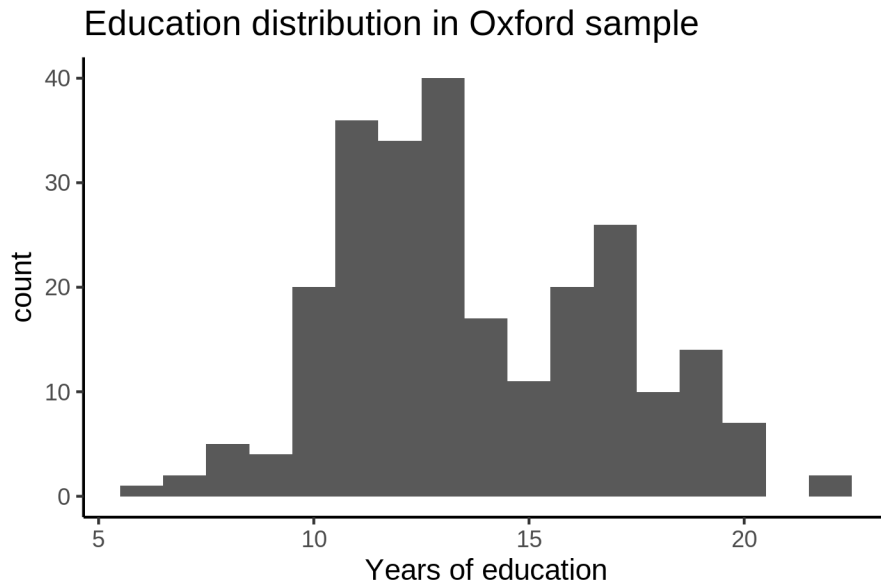

## Data harmonization

Since the income and education variables at each site are not directly comparable, we had to convert them to something which can be compared across sites. This is described here.

### Income

The plot below illustrates the data harmonization issue. The horizontal axis shows education levels mapped to the interval  $[0, 1]$ . While some sites have continuous income with very fat tail to the right (UiO, MPIB), others have predefined categories with very similar numbers in each. Since we are not able to split up the most coarse numbers into finer grained ones, we instead make the fine grained ones coarser.

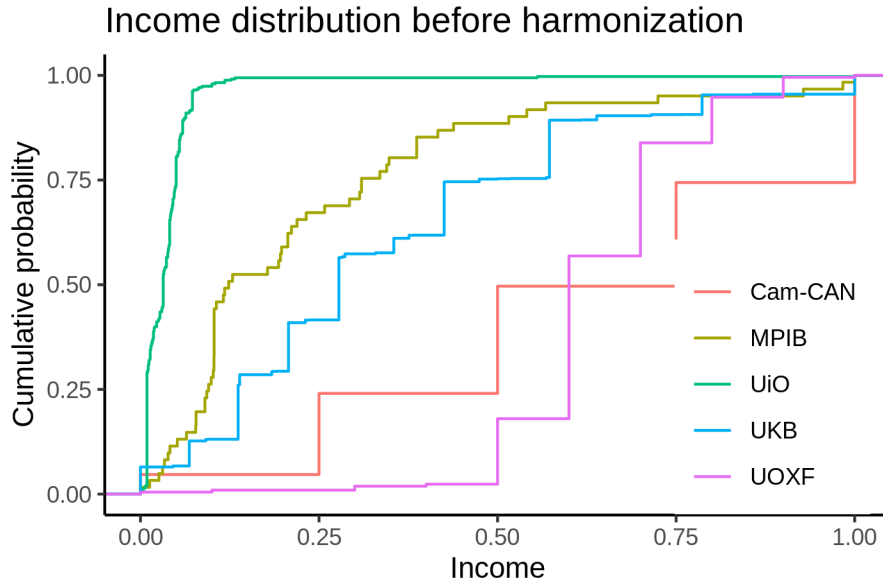

For each study separately, the income values were split into four equally sized bins, except for UOXF and Cam-CAN, for which we only had sufficient data to create three bins. The resulting distribution of values is shown in the plot below, and contains the income values used in subsequent analyses.

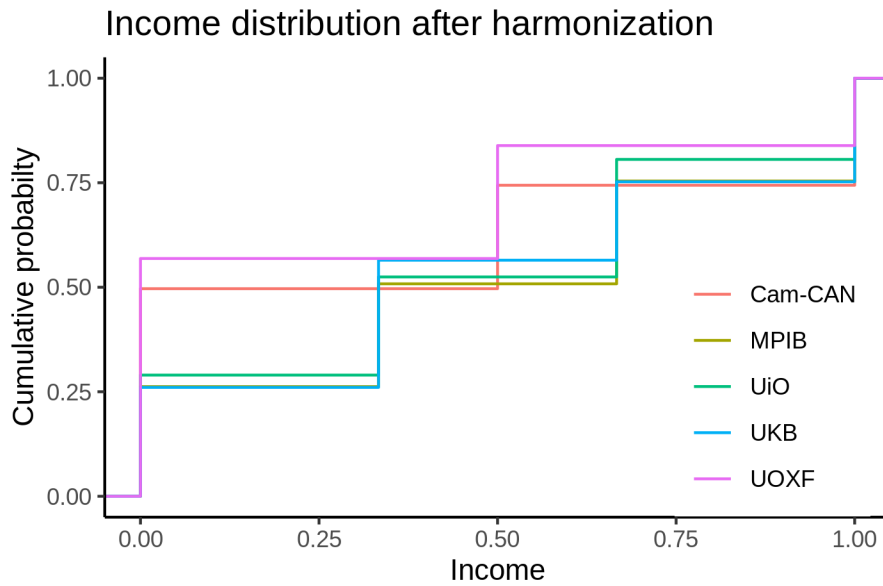

## Education

A similar strategy was used to harmonize the education data. The plot below shows the original values.

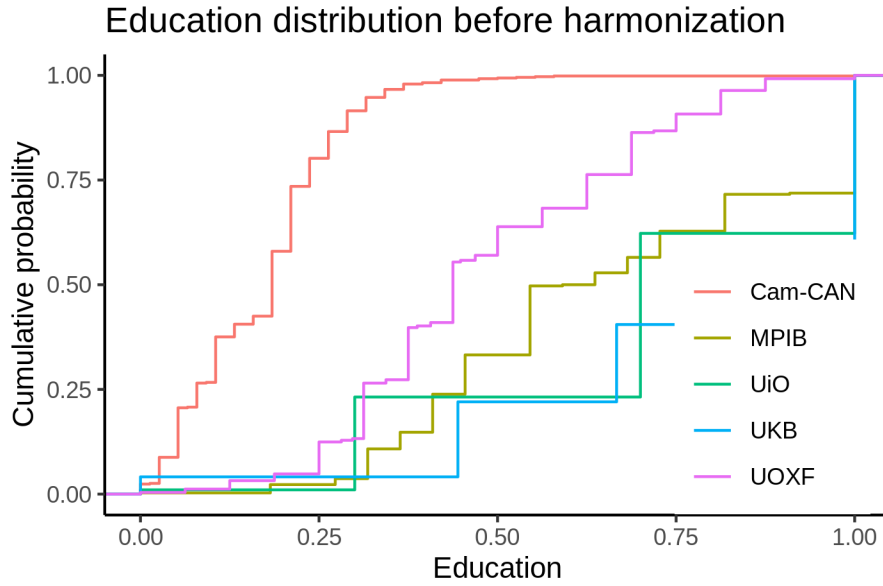

The next plot shows the distribution after harmonization. We are not able to make the distributions very similar, but at least it's an improvement over the raw values.

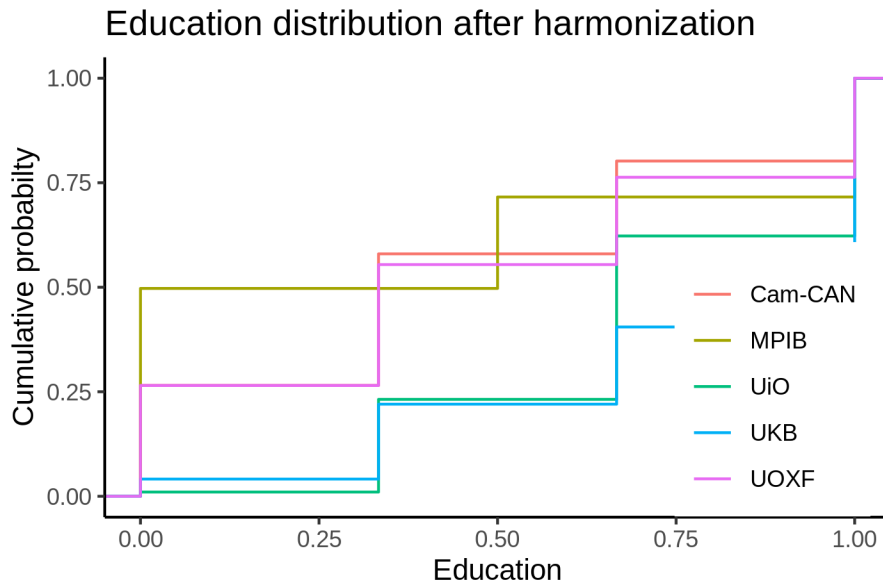

## BMI

BMI is measured exactly the same way in each sample, so it represents the same thing. We hence use this variable as it is.

## Depression

Distribution of depression covariates per site is shown below. The data are fairly harmonized.

## Depression distribution

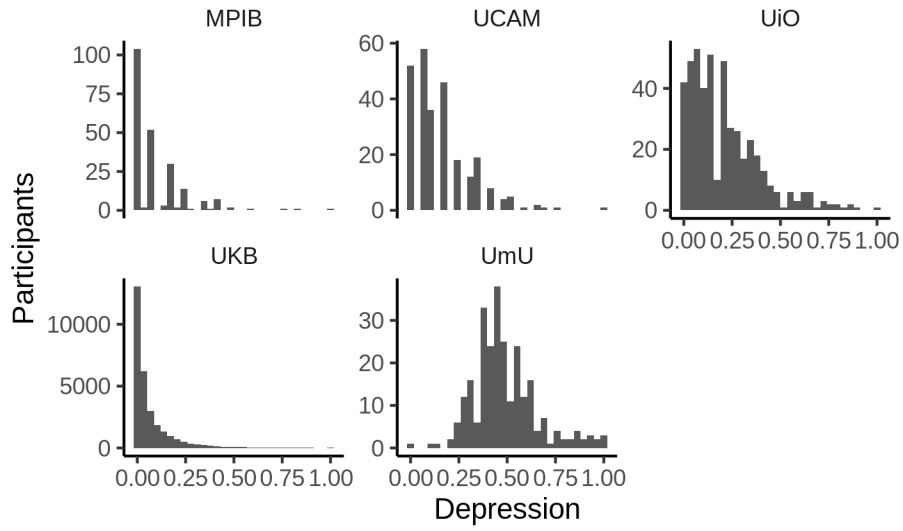

## Relationship between covariates and sleep

### Education and sleep

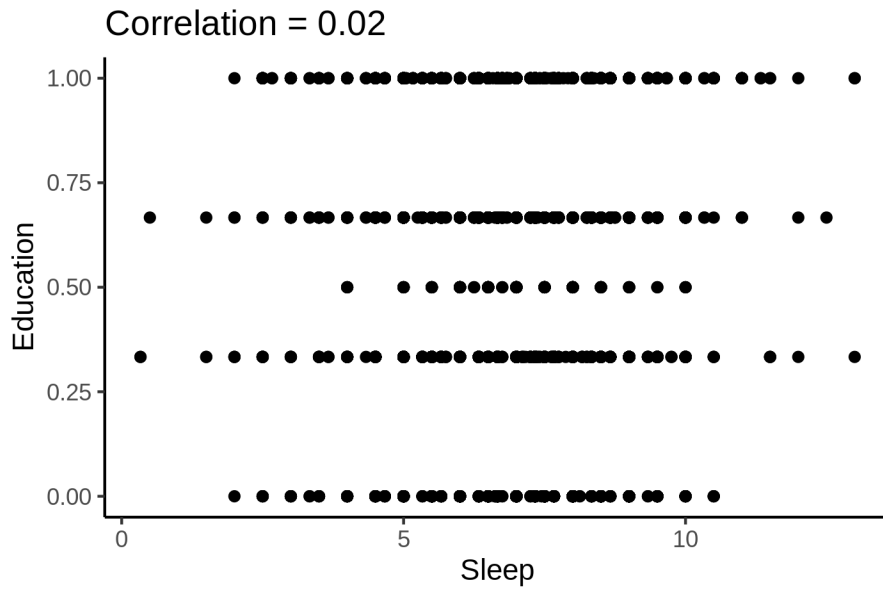



Income and sleep

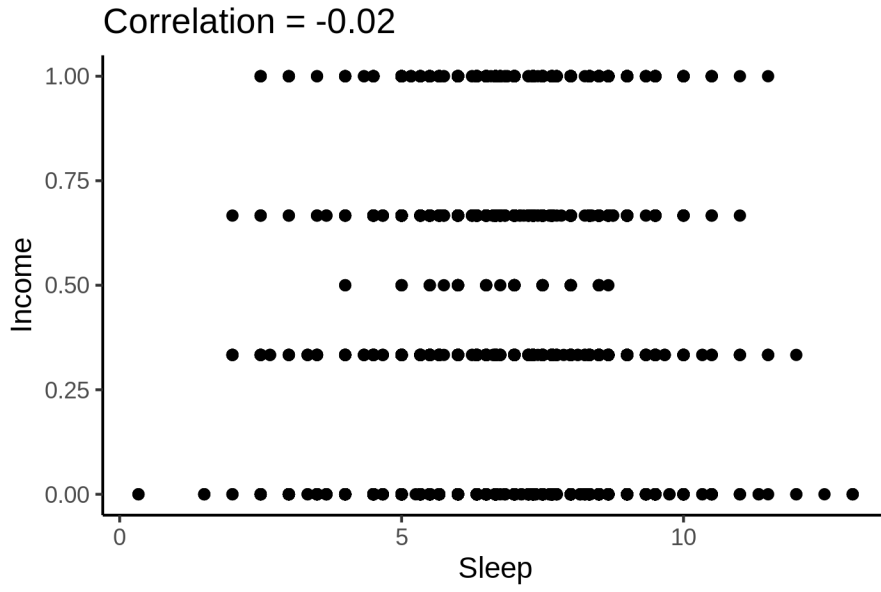

BMI and sleep

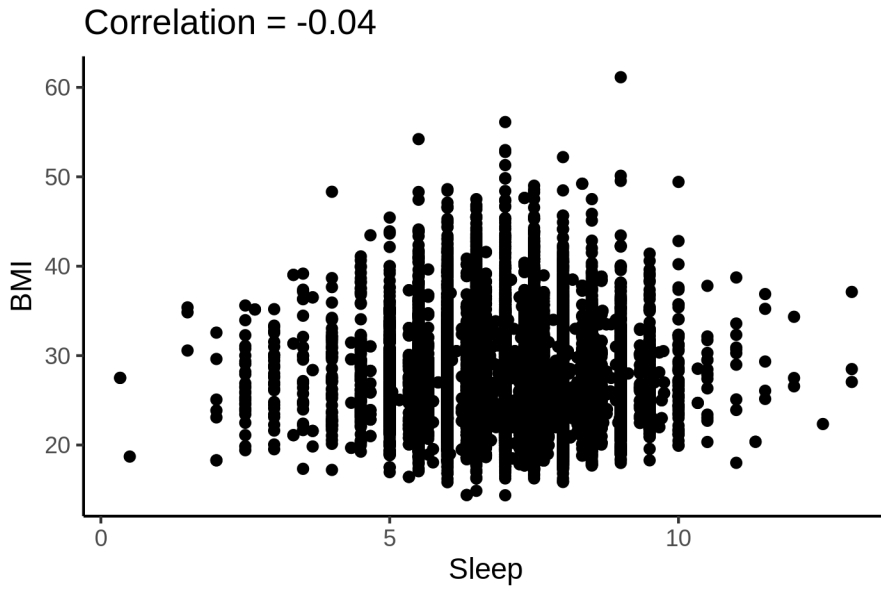

## Depression and sleep

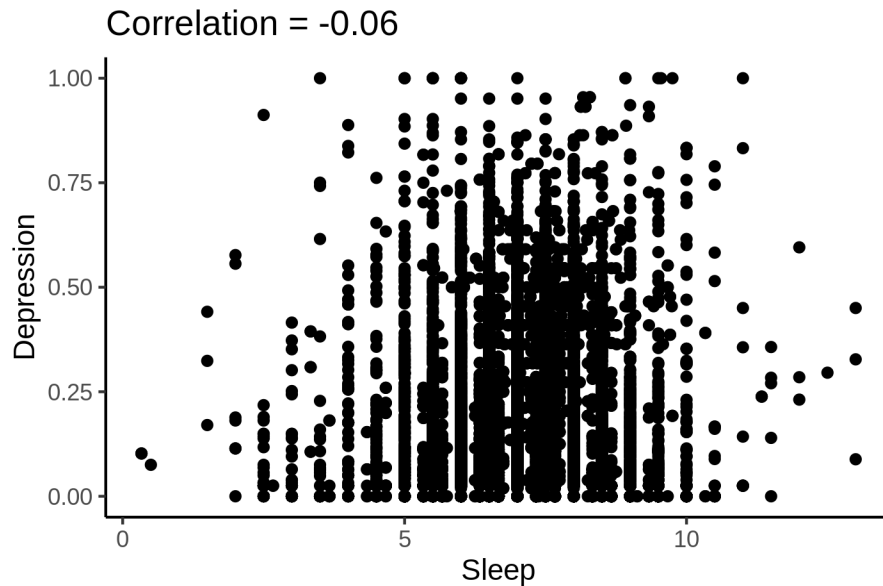

## References

- Benjamini, Yoav, and Yosef Hochberg. 1995. "Controlling the False Discovery Rate: A Practical and Powerful Approach to Multiple Testing." *Journal of the Royal Statistical Society: Series B (Methodological)* 57 (1): 289–300. <https://doi.org/10.1111/j.2517-6161.1995.tb02031.x>.
- Henry, Lionel, and Hadley Wickham. 2020. *Purrr: Functional Programming Tools*. <https://CRAN.R-project.org/package=purrr>.
- Hester, Jim. 2020. *Glue: Interpreted String Literals*. <https://CRAN.R-project.org/package=glue>.
- R Core Team. 2020. *R: A Language and Environment for Statistical Computing*. Vienna, Austria: R Foundation for Statistical Computing. <https://www.R-project.org/>.
- Ruppert, David, M. P. Wand, and R. J. Carroll. 2003. *Semiparametric Regression*. Cambridge University Press, Cambridge, U.K.
- Sørensen, Øystein, Kristine B. Walhovd, and Anders M. Fjell. 2021. "A Recipe for Accurate Estimation of Lifespan Brain Trajectories, Distinguishing Longitudinal and Cohort Effects." *NeuroImage* 226 (February): 117596. <https://doi.org/10.1016/j.neuroimage.2020.117596>.
- Wickham, Hadley. 2016. *Ggplot2: Elegant Graphics for Data Analysis*. Springer-Verlag New York. <https://ggplot2.tidyverse.org>.
- . 2019. *Stringr: Simple, Consistent Wrappers for Common String Operations*. <https://CRAN.R-project.org/package=stringr>.
- . 2021. *Tidyr: Tidy Messy Data*. <https://CRAN.R-project.org/package=tidyr>.
- Wickham, Hadley, Mara Averick, Jennifer Bryan, Winston Chang, Lucy D'Agostino McGowan, Romain François, Garrett Grolemond, et al. 2019. "Welcome to the tidyverse." *Journal of Open Source Software* 4 (43): 1686. <https://doi.org/10.21105/joss.01686>.
- Wickham, Hadley, Romain François, Lionel Henry, and Kirill Müller. 2021. *Dplyr: A Grammar of Data Manipulation*. <https://CRAN.R-project.org/package=dplyr>.

- Wood, S. N. 2017. *Generalized Additive Models: An Introduction with R*. Second. Chapman and Hall/CRC.
- Wood, Simon, and Fabian Scheipl. 2020. *Gamm4: Generalized Additive Mixed Models Using 'Mgcv' and 'Lme4'*. <https://CRAN.R-project.org/package=gamm4>.

# Meta analysis

The analyses to be described were conducted in R version 4.1.0 (R Core Team 2020). We used the `metafor` package (Viechtbauer 2010) for the meta analysis and `tidyverse` (Wickham et al. 2019) for data manipulation and visualization.

```
library(tidyverse)
library(metafor)
```

## Controlling for ICV

We start the meta analysis using the models for subcortical volumes which controlled for intracranial volume.

We performed a meta-analytic fit in order to find the average across both cortical and subcortical regions of the sleep associated with maximum cortical thickness and subcortical volume. Corpus callosum structures were excluded because with one exception their estimated maximum volume sleep were fixed at the lower boundary of four hours. Including them would hence lead to division by zero in the meta analysis. This can also be seen in the supplementary material for subcortical volumes. We also excluded total gray matter volume and intracranial volume, and weighted the three cortical clusters and the seven subcortical regions such that cortex and subcortex contributed equally. Random effects meta analysis was used, since we did not expect each region to have the same sleep duration associated with maximum thickness/volume.

To be able to compare estimates across all regions, we used the model with a smooth term for sleep and no age interaction for all subcortical regions. In the supplementary material for subcortical volumes, this model specification is titled `mod_no_interaction`. For the ventricles, we searched for the number of hours of sleep corresponding to minimal volume, while for all other regions we search for the sleep duration that maximized the volumes. The posterior means (estimates) and standard errors were computed by sampling 5000 Monte Carlo samples from the empirical Bayes posterior distribution of the model for each region, constraining the number of hours of sleep to be between 4 and 12.

The complete data are shown below, where Cluster 1, 2, and 3 refer to the cortical clusters.

| Region                  | Posterior mean | Standard error | ci_lower | ci_upper | Weight |
|-------------------------|----------------|----------------|----------|----------|--------|
| Accumbens-area          | 7.121          | 2.997          | 4.000    | 10.000   | 0.083  |
| Amygdala                | 4.144          | 0.918          | 4.000    | 4.000    | 0.083  |
| Brain-Stem              | 6.253          | 1.227          | 4.000    | 7.225    | 0.083  |
| Caudate                 | 9.856          | 0.918          | 10.000   | 10.000   | 0.083  |
| Cerebellum-Cortex       | 7.153          | 0.254          | 6.750    | 7.350    | 0.083  |
| Cerebellum-White-Matter | 4.729          | 0.781          | 4.000    | 6.275    | 0.083  |
| CerebralWhiteMatterVol  | 4.578          | 0.777          | 4.000    | 6.325    | 0.083  |
| Hippocampus             | 6.260          | 0.533          | 4.699    | 7.050    | 0.083  |
| Pallidum                | 9.042          | 2.197          | 4.000    | 10.000   | 0.083  |
| Putamen                 | 4.474          | 1.619          | 4.000    | 10.000   | 0.083  |
| Thalamus                | 5.955          | 1.135          | 4.000    | 7.200    | 0.083  |
| Ventricles              | 5.582          | 1.267          | 4.000    | 7.275    | 0.083  |
| Cluster 1               | 6.440          | 0.355          | 5.720    | 7.140    | 0.333  |
| Cluster 2               | 6.740          | 0.190          | 6.320    | 7.080    | 0.333  |
| Cluster 3               | 7.020          | 0.205          | 6.400    | 7.220    | 0.333  |

The following call was used to fit the model.

```
meta_mod <- rma(yi = estimate, sei = standard_error, weights = weight,
               method = "REML", data = meta_dat)
```

And next is the model summary. The estimate refers to the average of the sleep associated with maximum subcortical volume and cortical thickness. The p-value is with respect to a null hypothesis that zero hours of sleep is optimal, and is hence not relevant. The confidence intervals, on the other hand, can be interpreted as usual.

```
summary(meta_mod)
```

```
##
## Random-Effects Model (k = 15; tau^2 estimator: REML)
##
##   logLik  deviance      AIC      BIC     AICc
## -26.3276  52.6552   56.6552   57.9333   57.7461
##
## tau^2 (estimated amount of total heterogeneity): 1.2872 (SE = 0.7348)
## tau (square root of estimated tau^2 value):      1.1346
## I^2 (total heterogeneity / total variability):   86.17%
## H^2 (total variability / sampling variability):  7.23
##
## Test for Heterogeneity:
## Q(df = 14) = 44.4388, p-val < .0001
##
## Model Results:
##
## estimate      se      zval      pval      ci.lb      ci.ub
##   6.4978   0.4261  15.2492  <.0001   5.6627   7.3330  ***
##
## ---
## Signif. codes:  0 '***' 0.001 '**' 0.01 '*' 0.05 '.' 0.1 ' ' 1
```

### Additional sensitivity check

Since we use a random effects meta analysis it is also possible to include the corpus callosum structures, despite them having zero standard errors. We show this below, as a check of the robustness of the conclusions.

We weighted the corpus callosum structures such that they in total contributed as much as a single other subcortical region. The complete data are shown below.

```
meta_dat %>%
  rename(
    Region = region,
    Estimate = estimate,
    `Standard error` = standard_error,
    Weight = weight
  ) %>%
  select(-weight0) %>%
  knitr::kable(digits = 3)
```

| Region         | Estimate | Standard error | ci_lower | ci_upper | Weight |
|----------------|----------|----------------|----------|----------|--------|
| Accumbens-area | 7.121    | 2.997          | 4.000    | 10.000   | 0.059  |
| Amygdala       | 4.144    | 0.918          | 4.000    | 4.000    | 0.059  |

| Region                  | Estimate | Standard error | ci_lower | ci_upper | Weight |
|-------------------------|----------|----------------|----------|----------|--------|
| Brain-Stem              | 6.253    | 1.227          | 4.000    | 7.225    | 0.059  |
| Caudate                 | 9.856    | 0.918          | 10.000   | 10.000   | 0.059  |
| CC_Anterior             | 4.547    | 0.815          | 4.000    | 6.451    | 0.012  |
| CC_Central              | 4.000    | 0.000          | 4.000    | 4.000    | 0.012  |
| CC_Mid_Anterior         | 4.000    | 0.000          | 4.000    | 4.000    | 0.012  |
| CC_Mid_Posterior        | 5.690    | 1.443          | 4.000    | 8.026    | 0.012  |
| CC_Posterior            | 7.267    | 0.461          | 6.650    | 7.550    | 0.012  |
| Cerebellum-Cortex       | 7.153    | 0.254          | 6.750    | 7.350    | 0.059  |
| Cerebellum-White-Matter | 4.729    | 0.781          | 4.000    | 6.275    | 0.059  |
| CerebralWhiteMatterVol  | 4.578    | 0.777          | 4.000    | 6.325    | 0.059  |
| Hippocampus             | 6.260    | 0.533          | 4.699    | 7.050    | 0.059  |
| Pallidum                | 9.042    | 2.197          | 4.000    | 10.000   | 0.059  |
| Putamen                 | 4.474    | 1.619          | 4.000    | 10.000   | 0.059  |
| Thalamus                | 5.955    | 1.135          | 4.000    | 7.200    | 0.059  |
| Ventricles              | 5.582    | 1.267          | 4.000    | 7.275    | 0.059  |
| Cluster 1               | 6.440    | 0.355          | 5.720    | 7.140    | 0.333  |
| Cluster 2               | 6.740    | 0.190          | 6.320    | 7.080    | 0.333  |
| Cluster 3               | 7.020    | 0.205          | 6.400    | 7.220    | 0.333  |

Next we fit the model. Note the warnings, which are expected.

```
meta_mod <- rma(yi = estimate, sei = standard_error, weights = weight,
               method = "REML", data = meta_dat)
```

```
## Warning: There are outcomes with non-positive sampling variances.
```

```
## Warning: Cannot compute Q-test, I^2, or H^2 when there are non-positive sampling
## variances in the data.
```

Here is the summary, which shows estimates close to what we got when excluding corpus callosum.

```
summary(meta_mod)
```

```
##
## Random-Effects Model (k = 20; tau^2 estimator: REML)
##
##   logLik deviance      AIC      BIC      AICc
## -37.5276  75.0552  79.0552  80.9441  79.8052
##
## tau^2 (estimated amount of total heterogeneity): 1.8823 (SE = 0.8144)
## tau (square root of estimated tau^2 value):      1.3720
##
## Model Results:
##
## estimate      se      zval      pval      ci.lb      ci.ub
##   6.4905  0.5110  12.7004 <.0001  5.4889  7.4921 ***
##
## ---
## Signif. codes:  0 '***' 0.001 '**' 0.01 '*' 0.05 '.' 0.1 ' ' 1
```

## Not Controlling for ICV

We next use the subcortical models which did not contain ICV. In this case only the ventricles had zero standard error, but to make the results comparable to above, we performed one analysis excluding the corpus callosum and one analysis including corpus callosum.

The complete data are shown below.

| Region                  | Estimate | Standard error | ci_lower | ci_upper | Weight |
|-------------------------|----------|----------------|----------|----------|--------|
| Accumbens-area          | 7.597    | 0.527          | 6.999    | 10.000   | 0.083  |
| Amygdala                | 7.359    | 0.620          | 6.725    | 10.000   | 0.083  |
| Brain-Stem              | 7.265    | 0.051          | 7.150    | 7.350    | 0.083  |
| Caudate                 | 9.467    | 0.783          | 7.650    | 10.000   | 0.083  |
| Cerebellum-Cortex       | 7.313    | 0.049          | 7.200    | 7.400    | 0.083  |
| Cerebellum-White-Matter | 7.114    | 0.167          | 6.700    | 7.325    | 0.083  |
| CerebralWhiteMatterVol  | 7.347    | 0.060          | 7.225    | 7.450    | 0.083  |
| Hippocampus             | 7.133    | 0.125          | 6.825    | 7.300    | 0.083  |
| Pallidum                | 7.831    | 0.833          | 7.375    | 10.000   | 0.083  |
| Putamen                 | 8.100    | 1.285          | 6.499    | 10.000   | 0.083  |
| Thalamus                | 7.294    | 0.055          | 7.175    | 7.375    | 0.083  |
| Ventricles              | 4.000    | 0.000          | 4.000    | 4.000    | 0.083  |
| Cluster 1               | 6.440    | 0.355          | 5.720    | 7.140    | 0.333  |
| Cluster 2               | 6.740    | 0.190          | 6.320    | 7.080    | 0.333  |
| Cluster 3               | 7.020    | 0.205          | 6.400    | 7.220    | 0.333  |

The following call was used to fit the model.

```
meta_mod <- rma(yi = estimate, sei = standard_error, weights = weight,
               method = "REML", data = meta_dat)
```

```
## Warning: There are outcomes with non-positive sampling variances.
```

```
## Warning: Cannot compute Q-test, I2, or H2 when there are non-positive sampling
## variances in the data.
```

And next is the model summary.

```
summary(meta_mod)
```

```
##
## Random-Effects Model (k = 15; tau2 estimator: REML)
##
##   logLik  deviance      AIC      BIC      AICc
## -21.5339  43.0678  47.0678  48.3459  48.1587
##
## tau2 (estimated amount of total heterogeneity): 1.0814 (SE = 0.4649)
## tau (square root of estimated tau2 value):      1.0399
##
## Model Results:
##
## estimate      se      zval      pval      ci.lb      ci.ub
## 7.0259  0.3531  19.8968 <.0001  6.3338  7.7180 ***
##
## ---
## Signif. codes:  0 '***' 0.001 '**' 0.01 '*' 0.05 '.' 0.1 ' ' 1
```

Next, we included the corpus callosum in the same way as in the sensitivity check above.

We weighted the corpus callosum structures such that they in total contributed as much as a single other subcortical region. The complete data are shown below.

```
meta_dat %>%
  rename(
    Region = region,
    Estimate = estimate,
    `Standard error` = standard_error,
    Weight = weight
  ) %>%
  knitr::kable(digits = 3)
```

| Region                  | Estimate | Standard error | ci_lower | ci_upper | weight0 | Weight |
|-------------------------|----------|----------------|----------|----------|---------|--------|
| Accumbens-area          | 7.597    | 0.527          | 6.999    | 10.000   | 1.0     | 0.059  |
| Amygdala                | 7.359    | 0.620          | 6.725    | 10.000   | 1.0     | 0.059  |
| Brain-Stem              | 7.265    | 0.051          | 7.150    | 7.350    | 1.0     | 0.059  |
| Caudate                 | 9.467    | 0.783          | 7.650    | 10.000   | 1.0     | 0.059  |
| CC_Anterior             | 7.236    | 0.127          | 6.950    | 7.400    | 0.2     | 0.012  |
| CC_Central              | 4.817    | 0.940          | 4.000    | 6.850    | 0.2     | 0.012  |
| CC_Mid_Anterior         | 4.742    | 0.973          | 4.000    | 6.975    | 0.2     | 0.012  |
| CC_Mid_Posterior        | 7.264    | 0.322          | 6.725    | 7.550    | 0.2     | 0.012  |
| CC_Posterior            | 7.379    | 0.101          | 7.250    | 7.475    | 0.2     | 0.012  |
| Cerebellum-Cortex       | 7.313    | 0.049          | 7.200    | 7.400    | 1.0     | 0.059  |
| Cerebellum-White-Matter | 7.114    | 0.167          | 6.700    | 7.325    | 1.0     | 0.059  |
| CerebralWhiteMatterVol  | 7.347    | 0.060          | 7.225    | 7.450    | 1.0     | 0.059  |
| Hippocampus             | 7.133    | 0.125          | 6.825    | 7.300    | 1.0     | 0.059  |
| Pallidum                | 7.831    | 0.833          | 7.375    | 10.000   | 1.0     | 0.059  |
| Putamen                 | 8.100    | 1.285          | 6.499    | 10.000   | 1.0     | 0.059  |
| Thalamus                | 7.294    | 0.055          | 7.175    | 7.375    | 1.0     | 0.059  |
| Ventricles              | 4.000    | 0.000          | 4.000    | 4.000    | 1.0     | 0.059  |
| Cluster 1               | 6.440    | 0.355          | 5.720    | 7.140    | 1.0     | 0.333  |
| Cluster 2               | 6.740    | 0.190          | 6.320    | 7.080    | 1.0     | 0.333  |
| Cluster 3               | 7.020    | 0.205          | 6.400    | 7.220    | 1.0     | 0.333  |

Next we fit the model.

```
meta_mod <- rma(yi = estimate, sei = standard_error, weights = weight,
               method = "REML", data = meta_dat)
```

```
## Warning: There are outcomes with non-positive sampling variances.
```

```
## Warning: Cannot compute Q-test, I^2, or H^2 when there are non-positive sampling
## variances in the data.
```

Here is the summary, which shows estimates close to what we got when excluding corpus callosum.

```
summary(meta_mod)
```

```
##
## Random-Effects Model (k = 20; tau^2 estimator: REML)
##
##   logLik deviance      AIC      BIC     AICc
## -29.5571  59.1142  63.1142  65.0031  63.8642
##
```



```
## tau^2 (estimated amount of total heterogeneity): 0.9820 (SE = 0.3715)
## tau (square root of estimated tau^2 value):      0.9910
##
## Model Results:
##
## estimate      se      zval      pval      ci.lb      ci.ub
## 6.9525 0.3604 19.2918 <.0001 6.2462 7.6589 ***
##
## ---
## Signif. codes:  0 '***' 0.001 '**' 0.01 '*' 0.05 '.' 0.1 ' ' 1
```

## References

- R Core Team. 2020. *R: A Language and Environment for Statistical Computing*. Vienna, Austria: R Foundation for Statistical Computing. <https://www.R-project.org/>.
- Viechtbauer, Wolfgang. 2010. “Conducting Meta-Analyses in R with the metafor Package.” *Journal of Statistical Software* 36 (3): 1–48. <https://doi.org/10.18637/jss.v036.i03>.
- Wickham, Hadley, Mara Averick, Jennifer Bryan, Winston Chang, Lucy D’Agostino McGowan, Romain François, Garrett Golemund, et al. 2019. “Welcome to the tidyverse.” *Journal of Open Source Software* 4 (43): 1686. <https://doi.org/10.21105/joss.01686>.

### Vertex-wise cortical thickness results

We tested associations between sleep duration and cortical thickness by vertex-wise spatiotemporal linear mixed-effect models (LME)<sup>1,2</sup>. The hierarchical nature of the data - repeated measurements nested within participants - was accounted for using a random intercept term for subject ID. Surface results were corrected for multiple testing by 10,000 Z Monte Carlo simulations using  $p < .01$  as cluster generation threshold and  $p < .05$  as cluster threshold<sup>3</sup>. As we previously have seen that sleep-cortex relationships tend to be stronger with higher age, we ran separate analyses in young/ middle-aged (20-60 years) and older adults (>60 years), and for participants with below vs. above average reported sleep duration. Analyses were thus run in four groups: young/ middle-aged with below (n = 9464) vs. above (n = 6421) average sleep, and older adults with below (n = 17119) vs. above (n = 15053) average sleep. The spatially strongest effects were found in the older adults sleeping above average, where longer sleep duration was associated with thinner cortex across most of the brain surface. There were positive associations between sleep duration and thickness in the younger and older below average sleep groups, and no effects in the young group sleeping above average.

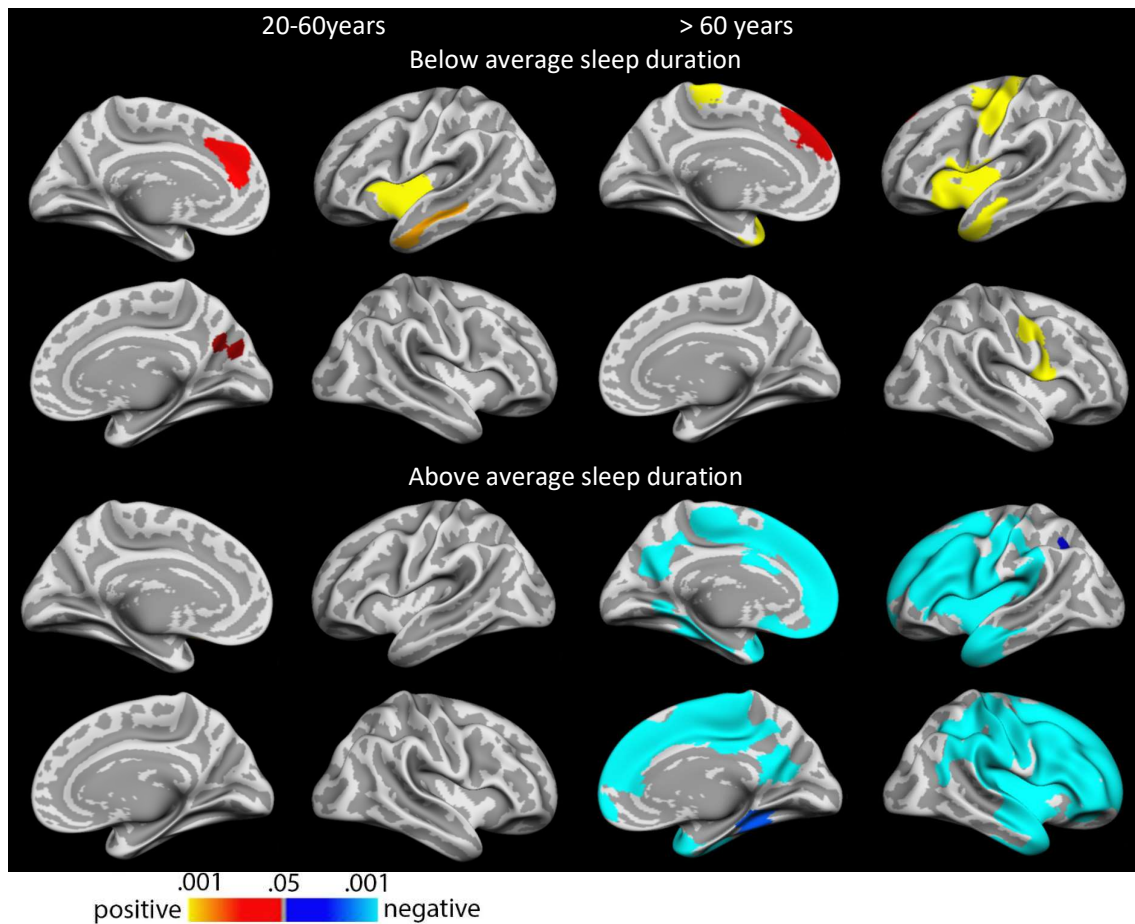

*Associations between sleep duration and cortical thickness (p-value maps). Spatiotemporal LMEs were used to take advantage of both the longitudinal and cross-sectional data. Only clusters surviving corrections for multiple comparisons are shown. Across all panels, warm colors indicate that longer sleep is associated with thicker cortex and cold colors indicate that shorter sleep is associated with thicker cortex.*

## References

- 1 Bernal-Rusiel, J. L. *et al.* Statistical analysis of longitudinal neuroimage data with Linear Mixed Effects models. *Neuroimage* **66**, 249-260, doi:10.1016/j.neuroimage.2012.10.065 (2013).
- 2 Bernal-Rusiel, J. L. *et al.* Spatiotemporal linear mixed effects modeling for the mass-univariate analysis of longitudinal neuroimage data. *Neuroimage* **81**, 358-370, doi:10.1016/j.neuroimage.2013.05.049 (2013).
- 3 Greve, D. N. & Fischl, B. False positive rates in surface-based anatomical analysis. *Neuroimage* **171**, 6-14, doi:10.1016/j.neuroimage.2017.12.072 (2018).

## Comparing mega and meta-analytic estimates for sleep – cortex relationships

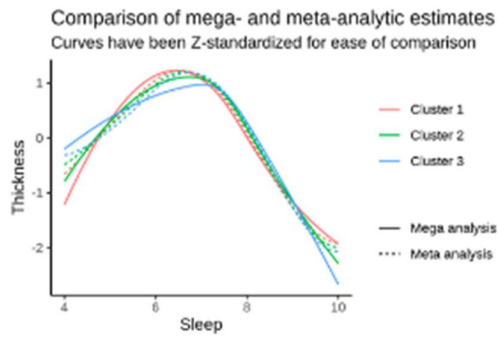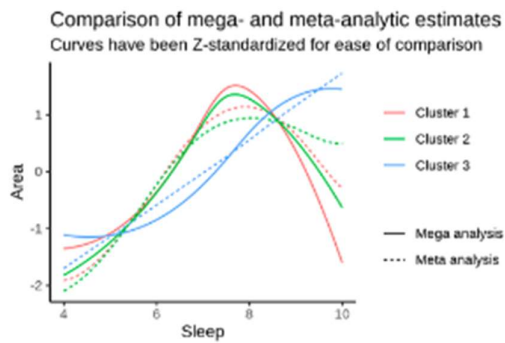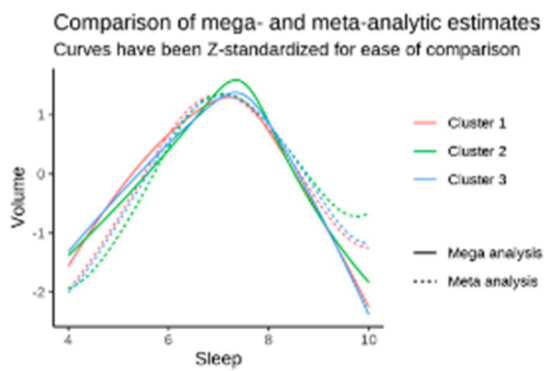

## SI Genetic analyses

### Genome-Wide Association studies (GWAS) Using UK Biobank data

We accessed the UK Biobank genetic data (<https://www.ukbiobank.ac.uk/about-biobank-uk/>) released in February 2020 through the application no. 32048. Ethical approval of UK Biobank project was obtained from the National Health Service National Research Ethics Service (Ref 11/NW/0382) and all participants provided written informed consent. Among the 502,507 participants, 40,682 had undergone MRI and 487,409 had DNA genotypes. The detailed information on genotyping, imputation and quality controls was published by<sup>1</sup>. Before performing GWAS, we excluded participants who are not self-reported white-British (n=92 900), have relatives in the biobank (n=148 689), had been labelled as outliers in missingness or heterozygosity (n=968) or had conflicting self-reported vs. genetic sex (n=378) by UK Biobank team. Among the remaining 339696 participants, 125 800 reported sleep duration longer than 7 hours, and 213 331 reported sleep duration less or equal to 7 hours. 29 155 of these participants had undergone MRI. Genotypes of the UK Biobank participants were filtered by removing variants that are non-SNP, had a minor allele frequency less than 0.01, failed the Hardy-Weinberg equilibrium test ( $p < 1e^{-6}$ ), or had large missingness ( $> 0.05$ ). In total, 9 153 887 autosomal SNPs were analyzed.

#### *GWAS for sleep duration among participants sleeping $\leq 7$ hours*

We performed GWAS for sleep durations for UKB participants who reported less than or equal to 7 hours of sleep and had not undergone MRI (n=197,137). The sleep duration was scaled by subtracting the mean and divided by the standard deviations in this subsample. A linear regression model was used to identify SNPs that were associated with scaled sleep durations. Age at baseline, sex and the top 10 genetic principal components (PC, obtained from UK Biobank) were included as covariates in the model. The PLINK2 command `-glm` was used for this analysis. A genomic inflation factor was estimated to be 1.03 based on the GWAS summary statistics, i.e., no discernable inflation of the associations was observed. The association quantile-quantile plot, and the Manhattan plot are shown below.

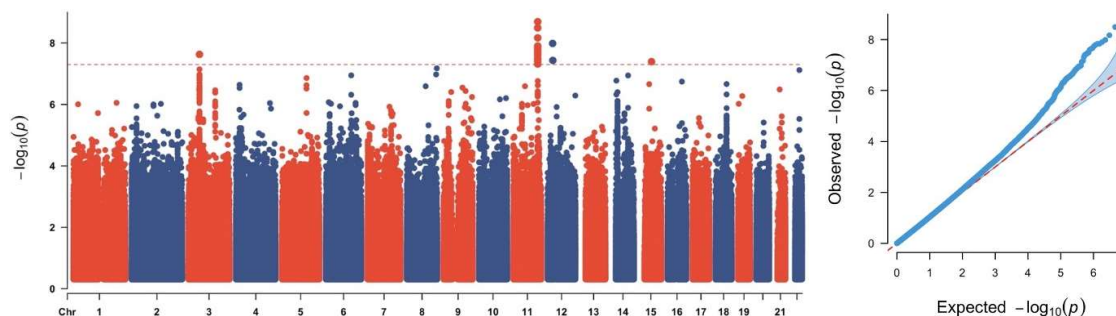

*Left panel: Manhattan plot of GWAS for sleep duration in participants sleeping  $\leq 7$  hours, with the dotted red line showing the genome-wide significance level ( $p < 5 \times 10^{-8}$ ). Right panel: QQ plot of GWAS for sleep duration.*

#### *GWAS for sleep duration among participants sleeping $> 7$ hours*

We also performed GWAS for sleep durations for UKB participants who reported more than 7 hours of sleep and had not undergone MRI (n=112,839). The sleep duration was scaled by subtracting the

mean and divided by the standard deviations in this subsample. A linear regression model was used for identified SNPs that associated with scaled sleep durations. Age at baseline, sex and the top 10 genetic principal components (obtained from UK Biobank) were included as covariates in the model. The PLINK2<sup>2</sup> command `–glm` was used for this analysis. A genomic inflation factor was estimated to 1.02 based on the GWAS summary statistics, i.e., no discernible inflation of the associations was observed. The association quantile-quantile plot, and the Manhattan plot are shown below.

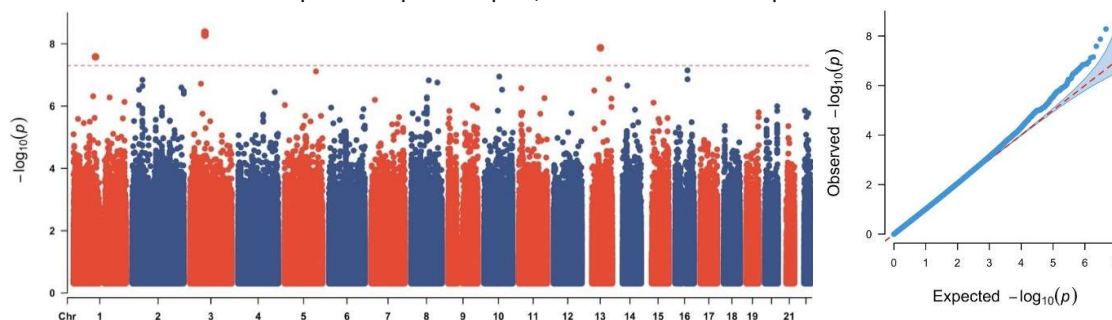

Left panel: Manhattan plot of GWAS for sleep duration in participants sleeping > 7 hours, with the dotted red line showing the genome-wide significance level ( $p < 5 \times 10^{-8}$ ). Right panel: QQ plot of GWAS for sleep duration.

#### GWAS for Hippocampal volume, total grey matter volume and intracranial volume

For the 29 155 participants, GWAS for total hippocampal volume (HippV), total grey matter volume (TGV) and estimated intracranial volume (ICV) were performed using the `–glm` function from PLINK2, separately for each MRI derived measure. In each GWAS, the phenotype was first scaled as for sleep duration. In addition to age at MRI, sex and the top 10 genetic PCs, ICV was included as a covariate for the GWAS of HippV and TGV. Genomic inflation factors were estimated to 1.05, 1.06 and 1.02 for the GWAS summary statistics for HippV, ICV and TGV, respectively. The association quantile-quantile plots, and the Manhattan plots are shown below.

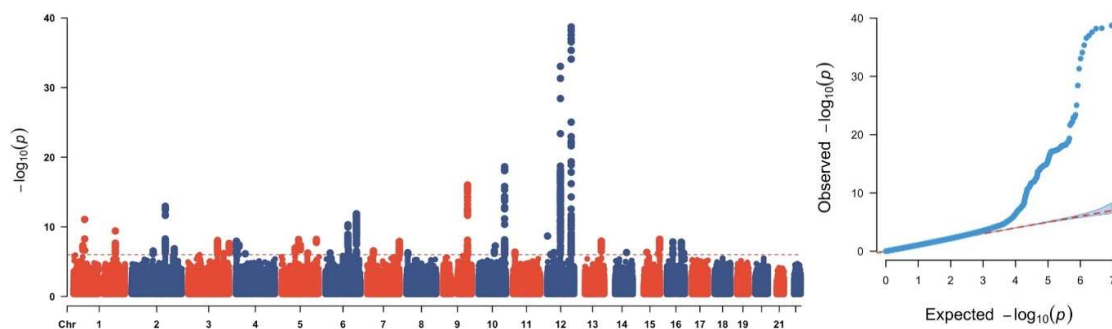

Left panel: Manhattan plot of GWAS for hippocampal volume, with the dotted red line showing the genome-wide significance level ( $p < 5 \times 10^{-8}$ ). Right panel: QQ plot of GWAS for hippocampal volume.

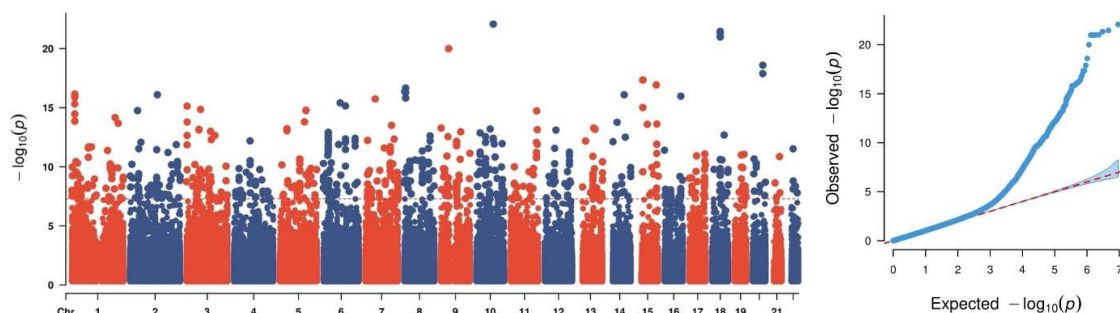

Left panel: Manhattan plot of GWAS for total gray matter volume, with the dotted red line showing the genome-wide significance level ( $p < 5 \times 10^{-8}$ ). Right panel: QQ plot of GWAS for total gray matter volume.

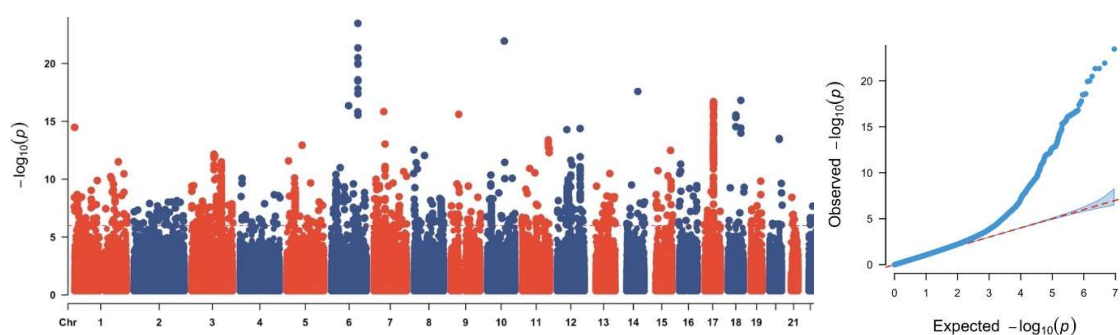

Left panel: Manhattan plot of GWAS for intracranial volume, with the dotted red line showing the genome-wide significance level ( $p < 5 \times 10^{-8}$ ). Right panel: QQ plot of GWAS for intracranial volume.

### SNP heritability and genetic correlations

The Linkage Disequilibrium score regression (LD)<sup>3</sup> model was used for estimating SNP heritability and between-traits genetic correlations using GWAS summary statistics. Association statistics were first aligned with high quality HapMap 3 SNPs, and then the LD scores for these set SNPs were used. The signed-sumstats were assigned to regression beta, 0. The SNP heritabilities for hippocampal volume, ICV and total gray matter volume were estimated to 0.29 (se=0.03), 0.35 (se=0.03) and 0.22 (se=0.02), respectively. The numbers for Sleep durations were 0.04 (se=0.003) and 0.02 (se=0.005) for participants sleeping less than or equal to versus longer than 7 hours, respectively. The genetic correlations between sleep duration ( $\leq 7$  hours) and hippocampal volume, ICV and total gray matter volume were estimated to be 0.04 (se=0.05,  $p=0.47$ ), 0.1 (se=0.05,  $p=0.05$ ) and 0.09 (se=0.06,  $p=0.10$ ), respectively. The genetic correlations between sleep duration ( $>7$  hours) and hippocampal volume, ICV and total gray matter volume were estimated to be -0.08 (se=0.10,  $p=0.43$ ), -0.07 (se=0.08,  $p=0.44$ ) and 0.04 (se=0.10,  $p=0.70$ ), respectively.

### Polygenic scores

To accurately estimate the polygenic scores for a trait, we first computed the posterior effect size per SNP using the Bayesian mixture model implemented in PRS-CS<sup>4</sup>. The Polygenic risk score via continuous shrinkage priors (PRS-CS) model is a widely used method for computing polygenic score for highly polygenic traits<sup>1</sup>. PRS-CS shrinks effect sizes estimated from GWAS using linkage-

disequilibrium (LD) correlations in a Bayesian framework, assuming a two-component mixture prior distribution. The LD correlations provided by PRS-CS were based on the 1000 Genomes phase 3 European population. In total, about 1.3 million high quality SNPs were used. In addition, PRS-CS does not need information from the target sample where the estimated posterior effect will be used for computing polygenic score. Thus, the GWAS sample and the target sample were treated fully independently in the polygenic score computation. Furthermore, in light of ours and previously published GWAS results, we assumed a highly polygenic genetic architecture for both MRI derived traits and sleep duration, by setting the parameter phi to 0.01, instead of a grid-search strategy proposed by the model. We believe our choice, though conservative, further reduce the overfitting risk. For other parameters in PRS-CS, we used the default values.

The posterior effect sizes obtained by running PRS-CS on each GWAS were then used separately to compute polygenic scores. We did not use p-values or LD threshold to select SNPs. Rather, genome wide SNPs were used for computing the polygenic scores. After removing rare variants (minor allele frequency < 0.01) in UK biobank, variants not in the HapMap 3 data, and variants that are not on the Hardy-Weinberg equilibrium ( $p < 10^{-6}$ ), we used the remaining 615297 SNPs for computing the polygenic scores for each trait. Recent methodology studies all point to the advantage of using shrinkage based methods over p-value based thresholding methods, for example LDpred2, PRS-CS, and the lasso-based models<sup>3</sup>, particularly for highly polygenic traits. The computed posterior effects were used as weights in the computation of PGSs for a trait by using the score function from PLINK2. To examine the associations between PGS for a trait with a second trait, linear regression models were used. The same covariates included in the GWAS analysis were included as covariates in addition to PGSs in these models.

| PGS     | Trait   | Beta                   | Se                    | t-score | P                      | FDR                    |
|---------|---------|------------------------|-----------------------|---------|------------------------|------------------------|
| ICV     | Sleep<7 | $1.91 \times 10^{-2}$  | $2.56 \times 10^{-3}$ | 8.47    | $< 2 \times 10^{-16}$  | $2.40 \times 10^{-15}$ |
|         | Sleep>7 | $-6.23 \times 10^{-3}$ | $2.98 \times 10^{-3}$ | -2.09   | 0.04                   | 0.32                   |
| HippV   | Sleep<7 | $2.43 \times 10^{-3}$  | $2.26 \times 10^{-3}$ | 1.07    | 0.28                   | 0.66                   |
|         | Sleep>7 | $-4.16 \times 10^{-3}$ | $2.98 \times 10^{-3}$ | -1.40   | 0.16                   | 0.66                   |
| TGV     | Sleep<7 | $1.05 \times 10^{-2}$  | $2.56 \times 10^{-3}$ | 4.65    | $3.28 \times 10^{-6}$  | $3.28 \times 10^{-5}$  |
|         | Sleep>7 | $-4.23 \times 10^{-3}$ | $2.97 \times 10^{-3}$ | -1.42   | 0.16                   | 0.66                   |
| Sleep<7 | ICV     | $3.33 \times 10^{-2}$  | $4.77 \times 10^{-3}$ | 6.99    | $2.75 \times 10^{-12}$ | $3.03 \times 10^{-11}$ |
|         | HippV   | $3.25 \times 10^{-3}$  | $4.56 \times 10^{-3}$ | 0.713   | 0.48                   | 0.66                   |
|         | TGV     | $7.84 \times 10^{-3}$  | $2.91 \times 10^{-3}$ | 2.69    | $7.13 \times 10^{-3}$  | $6.42 \times 10^{-2}$  |
| Sleep>7 | ICV     | $-8.42 \times 10^{-3}$ | $4.78 \times 10^{-3}$ | -1.76   | $7.81 \times 10^{-2}$  | 0.51                   |
|         | HippV   | $-7.30 \times 10^{-3}$ | $4.56 \times 10^{-3}$ | -1.60   | 0.11                   | 0.66                   |
|         | TGV     | $-4.50 \times 10^{-3}$ | $2.90 \times 10^{-3}$ | -1.55   | 0.12                   | 0.66                   |

*Polygenic score (PGS) associations between sleep duration and HippV, ICV and TGV. PGS were tested for associations with measured traits (Traits) in independent samples. Linear regression models were used to estimate the effect sizes of PGS to sleep duration for those sleeping less than or equal 7 hours per day (Sleep<7) and those sleeping more than 7 hours per day (Sleep>7). Generalized additive models were used for estimating effects of PGS to total Hippocampal volume (HippV), total grey matter volume (TGV) and estimated intracranial volume (ICV), taking age at scan as the smoothed variable. Age, sex and the top 10 genetic principal components were included as covariates in all models. For HippV and TGV, ICV was included as an additional covariate. Note, effect sizes (beta) indicate the amount of change in standard deviation of a trait by one standard deviate increase of a PGS.*



## Mendelian randomization

### *Instrumental variants selection*

To determine the SNP-phenotype associations, the subset of SNPs associated with the phenotype having  $p < 1 \times 10^{-6}$  and also existing in the GWAS results were used. Using  $p < 10^{-6}$  instead of the GWAS threshold ( $p < 5 \times 10^{-8}$ ) was done because of the relative low power of our GWAS for sleep duration, which used at most one third of the sample size used in previous sleep-duration studies. The comparatively low-powered GWAS combined with high polygenicity and low heritability estimates for sleep duration yields very few genome-wide significant loci/SNPs (4 for short-sleeper and 3 for long-sleeper). These small numbers of instruments explain only a minor portion of the variance. Hence, we had to use a trade-off between strength of the instrument and risk of horizontal pleiotropy, and therefore employed the suggestive  $p$  value thresholds for selecting instrument SNPs.

SNPs with minor allele frequency (MAF)  $< 0.05$  in the GWAS sample, or having ambiguous allelic coding, i.e., A/T or C/G, were excluded from the instrument set. To remove correlated SNPs, the linkage disequilibrium (LD) clumping method implemented by PLINK was used. The following parameters in PLINK were set, clump-kb 10,000 kb, and --clump-r2 0.1. The LD structure from the corresponding GWAS sample were used for clumping. The full list of SNPs selected as instruments for each analysis are presented in SI Genetics supplementary tables. The strength of the instruments to an outcome was evaluated using the F statistic.

As we did not find significant causal effects of sleep duration on MRI-derived traits using  $p < 10^{-6}$ , we reasoned that the instrument strengths were still too low, and the exposure variance explained by instruments was 0.0014 for below-average and 0.0007 for above-average sleepers, estimated by the Steiger test, and reperformed MR using SNPs with an association  $p < 10^{-5}$ , where the explained variances increased to 0.003 for shorter than average sleepers and 0.005 for longer than average sleepers. We found no significant causal effects by this even more liberal threshold neither.

| Exposure | outcome | Beta                   | Se                    | P                     |
|----------|---------|------------------------|-----------------------|-----------------------|
| ICV      | Sleep<7 | $5.99 \times 10^{-2}$  | $1.73 \times 10^{-2}$ | $5.36 \times 10^{-4}$ |
|          | Sleep>7 | $-3.67 \times 10^{-3}$ | $2.57 \times 10^{-2}$ | 0.87                  |
| HippV    | Sleep<7 | $1.13 \times 10^{-2}$  | $1.45 \times 10^{-2}$ | 0.44                  |
|          | Sleep>7 | $9.61 \times 10^{-3}$  | $2.18 \times 10^{-2}$ | 0.66                  |
| TGV      | Sleep<7 | $5.18 \times 10^{-2}$  | $3.22 \times 10^{-2}$ | 0.11                  |
|          | Sleep>7 | $-8.99 \times 10^{-3}$ | $6.59 \times 10^{-2}$ | 0.89                  |
| Sleep<7  | ICV     | $4.38 \times 10^{-2}$  | 0.14                  | 0.75                  |
|          | HippV   | 0.16                   | 0.15                  | 0.30                  |
|          | TGV     | $2.66 \times 10^{-2}$  | $8.35 \times 10^{-2}$ | 0.75                  |
| Sleep>7  | ICV     | $6.14 \times 10^{-2}$  | 0.38                  | 0.87                  |
|          | HippV   | -0.16                  | 0.22                  | 0.48                  |
|          | TGV     | -0.35                  | 0.14                  | $1.22 \times 10^{-2}$ |

*Inverse variance weighted Mendelian randomization results between sleep duration and HippV, ICV and TGV.*

Finally, we performed two-sample Mendelian randomization analysis using several popular methods, the inverse variance weighted (IVW), the Egger regression, the weighted median and the robust adjusted profile score (RAPS) methods. The RAPS was only applied to weaker instruments, i.e.

$P < 10^{-5}$ . Full report for each pair of traits and each method were presented in SI Genetics supplementary notes.

| Exposure | outcome | Beta                   | Se                    | P    |
|----------|---------|------------------------|-----------------------|------|
| Sleep<7  | ICV     | -7.90x10 <sup>-3</sup> | 8.47x10 <sup>-2</sup> | 0.93 |
|          | HippV   | 2.72x10 <sup>-3</sup>  | 8.10x10 <sup>-2</sup> | 0.97 |
|          | TGV     | 6.96x10 <sup>-3</sup>  | 5.15x10 <sup>-2</sup> | 0.89 |
| Sleep>7  | ICV     | 5.29x10 <sup>-3</sup>  | 7.29x10 <sup>-2</sup> | 0.94 |
|          | HippV   | -6.95x10 <sup>-2</sup> | 6.89x10 <sup>-2</sup> | 0.31 |
|          | TGV     | -2.10x10 <sup>-2</sup> | 4.36x10 <sup>-2</sup> | 0.63 |

*Mendelian randomization by RAPS between sleep duration and HippV, ICV and TGV.*

### References

1. Sugden, K., *et al.* Establishing a generalized polyepigenetic biomarker for tobacco smoking. *Translational psychiatry* **9**, 92 (2019).
2. Chang, C.C., *et al.* Second-generation PLINK: rising to the challenge of larger and richer datasets. *Gigascience* **4**, 7 (2015).
3. Bulik-Sullivan, B.K., *et al.* LD Score regression distinguishes confounding from polygenicity in genome-wide association studies. *Nat Genet* **47**, 291-295 (2015).
4. Castellano, J.M., *et al.* Human apoE Isoforms Differentially Regulate Brain Amyloid- $\beta$  Peptide Clearance. *Science translational medicine* **3**, 89ra57-89ra57 (2011).

# Two sample MR report

---

## HippV against SleepGt7

Date: 24 september, 2021

**P<10-6**

---

### Results from two sample MR:

| method                    | nsnp | b          | se        | pval      |
|---------------------------|------|------------|-----------|-----------|
| MR Egger                  | 76   | 0.0675178  | 0.0370249 | 0.0722541 |
| Weighted median           | 76   | -0.0061928 | 0.0211743 | 0.7699293 |
| Inverse variance weighted | 76   | -0.0057491 | 0.0149908 | 0.7013456 |
| Simple mode               | 76   | 0.0223998  | 0.0475225 | 0.6387583 |
| Weighted mode             | 76   | 0.0163095  | 0.0347411 | 0.6401034 |

---

### Heterogeneity tests

| method                    | Q        | Q_df | Q_pval    |
|---------------------------|----------|------|-----------|
| MR Egger                  | 89.81645 | 74   | 0.1017810 |
| Inverse variance weighted | 95.45002 | 75   | 0.0557322 |

---

### Test for directional horizontal pleiotropy

| egger_intercept | se        | pval      |
|-----------------|-----------|-----------|
| -0.0038145      | 0.0017706 | 0.0344626 |

---

### Test that the exposure is upstream of the outcome

| snp_r2.exposure | snp_r2.outcome | correct_causal_direction | steiger_pval |
|-----------------|----------------|--------------------------|--------------|
| 0.0937249       | 0.0011498      | TRUE                     | 0            |

---

Note - R<sup>2</sup> values are approximate

---

# Forest plot of single SNP MR

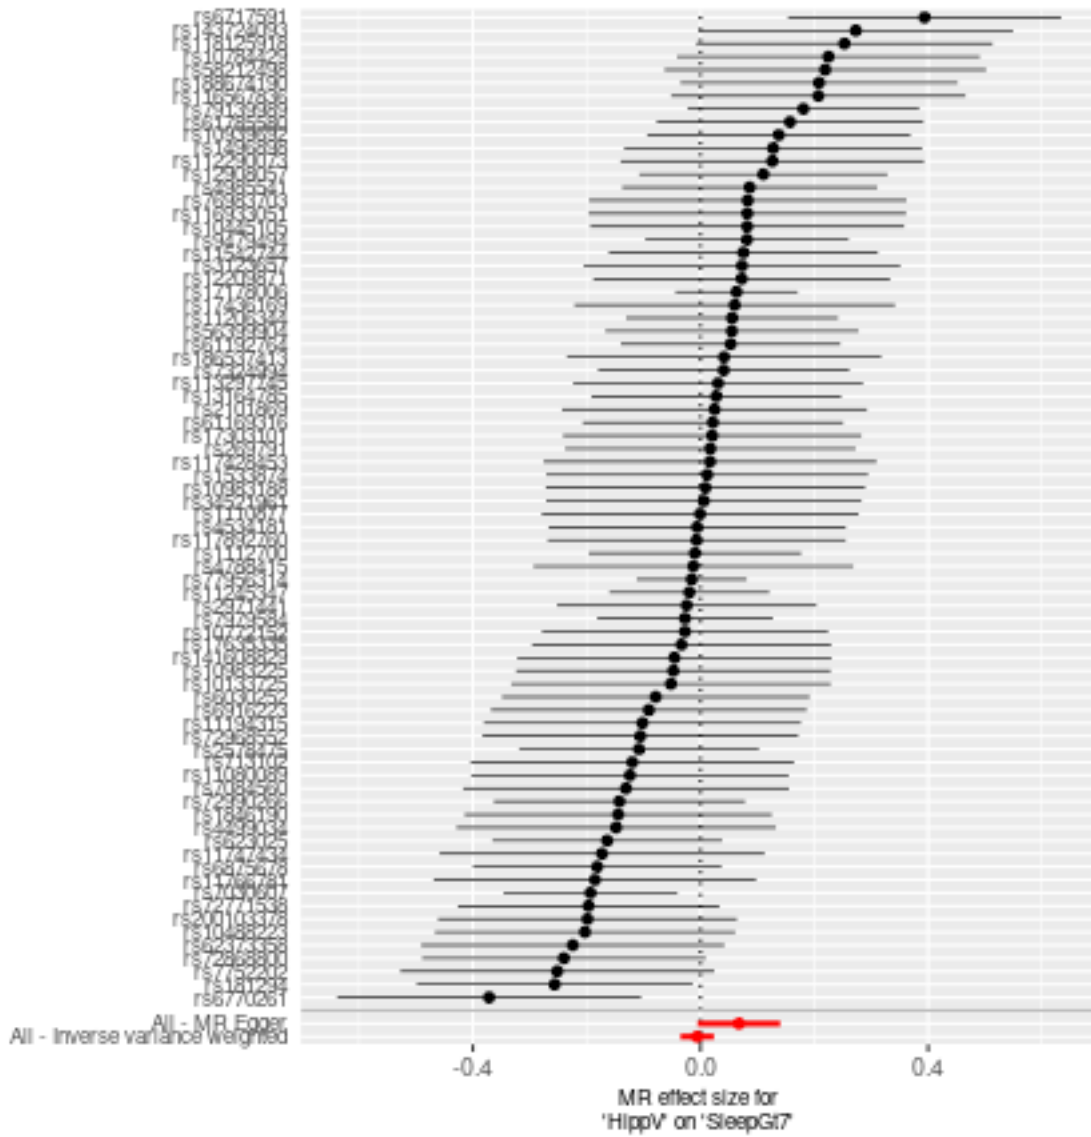

### Comparison of results using different MR methods

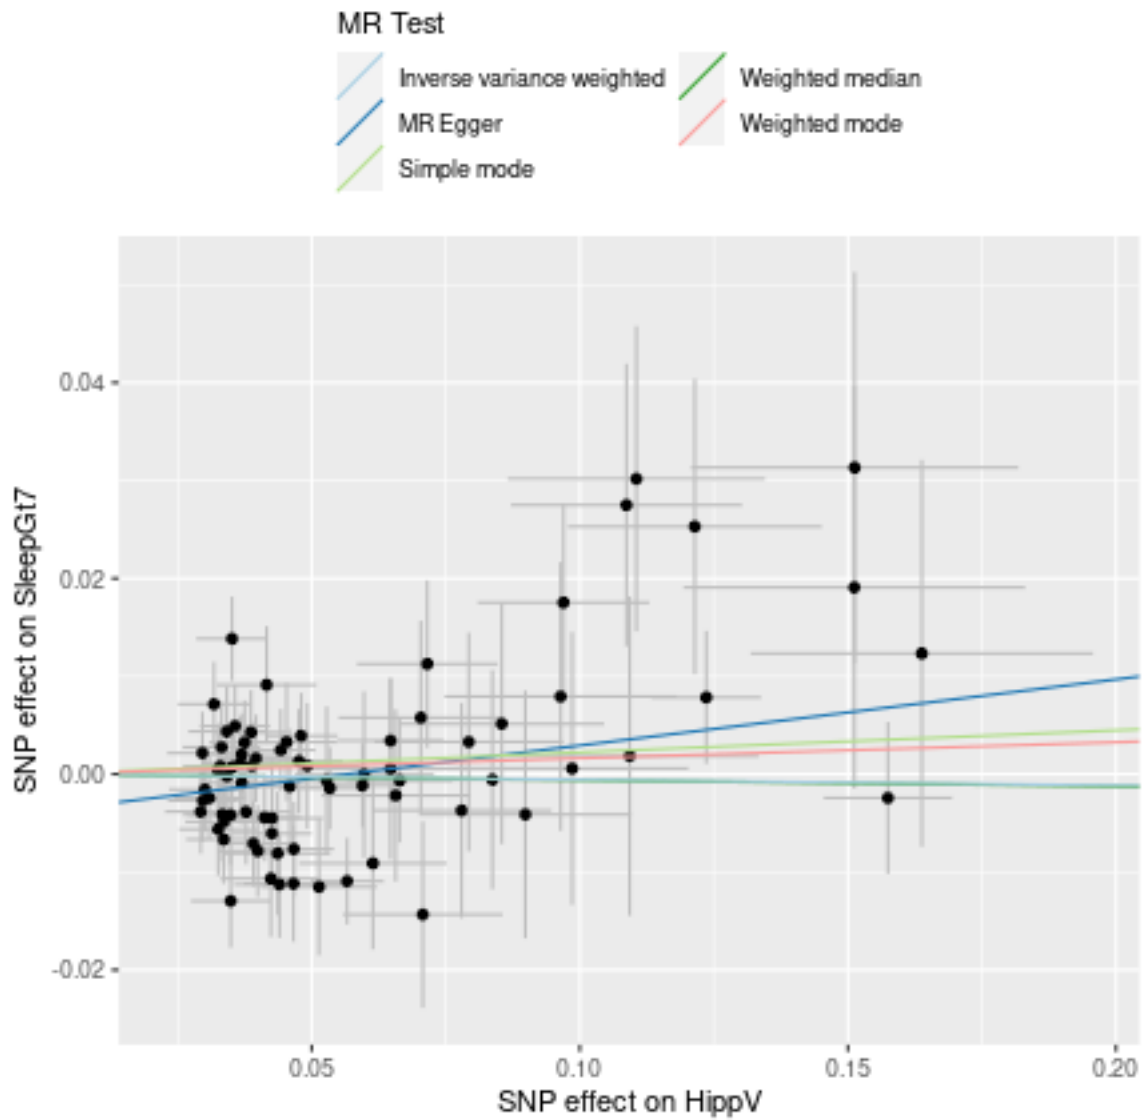

# Funnel plot

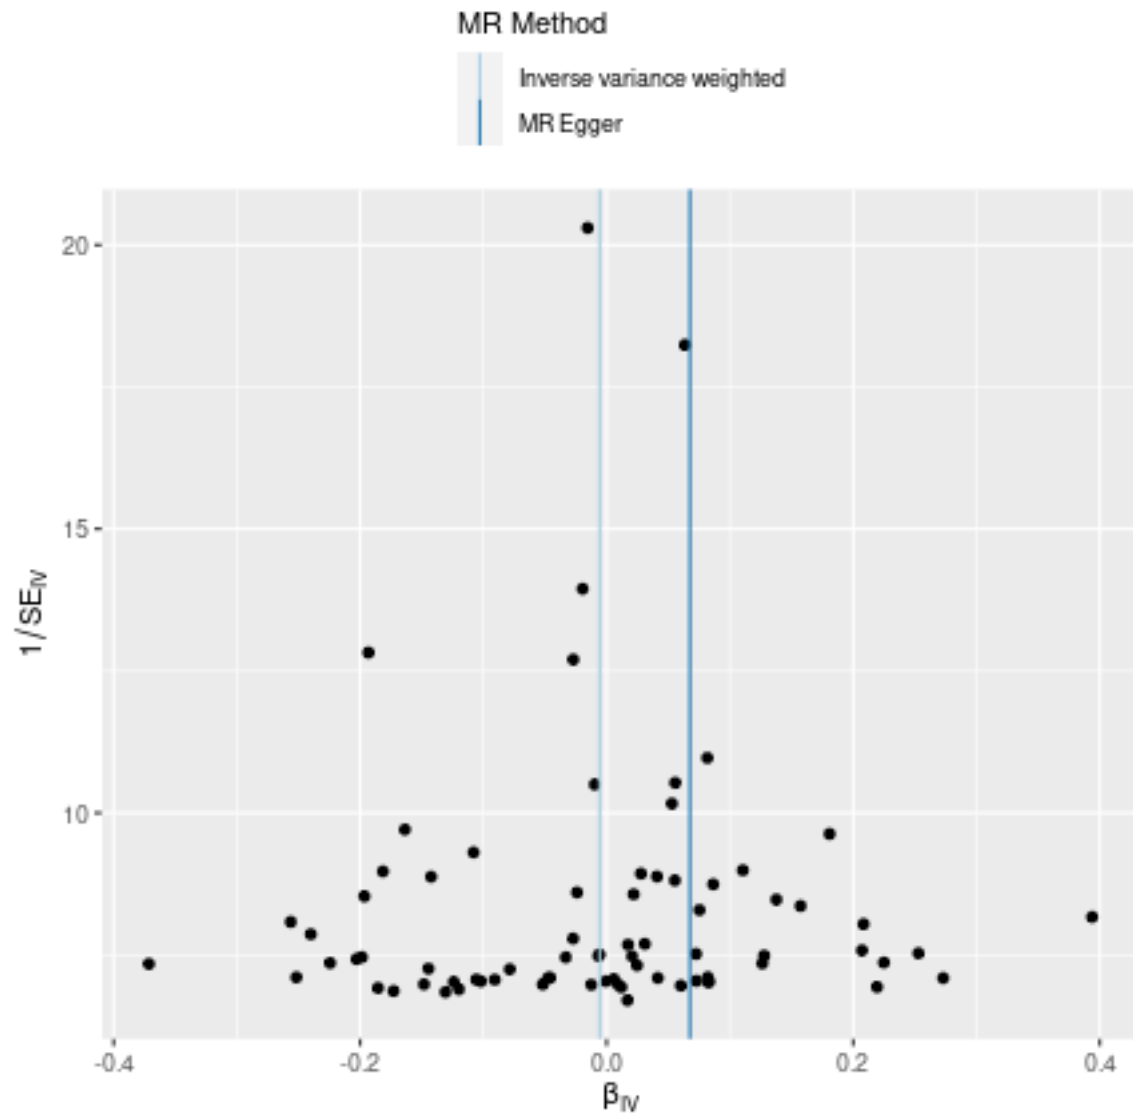

# Leave-one-out sensitivity analysis

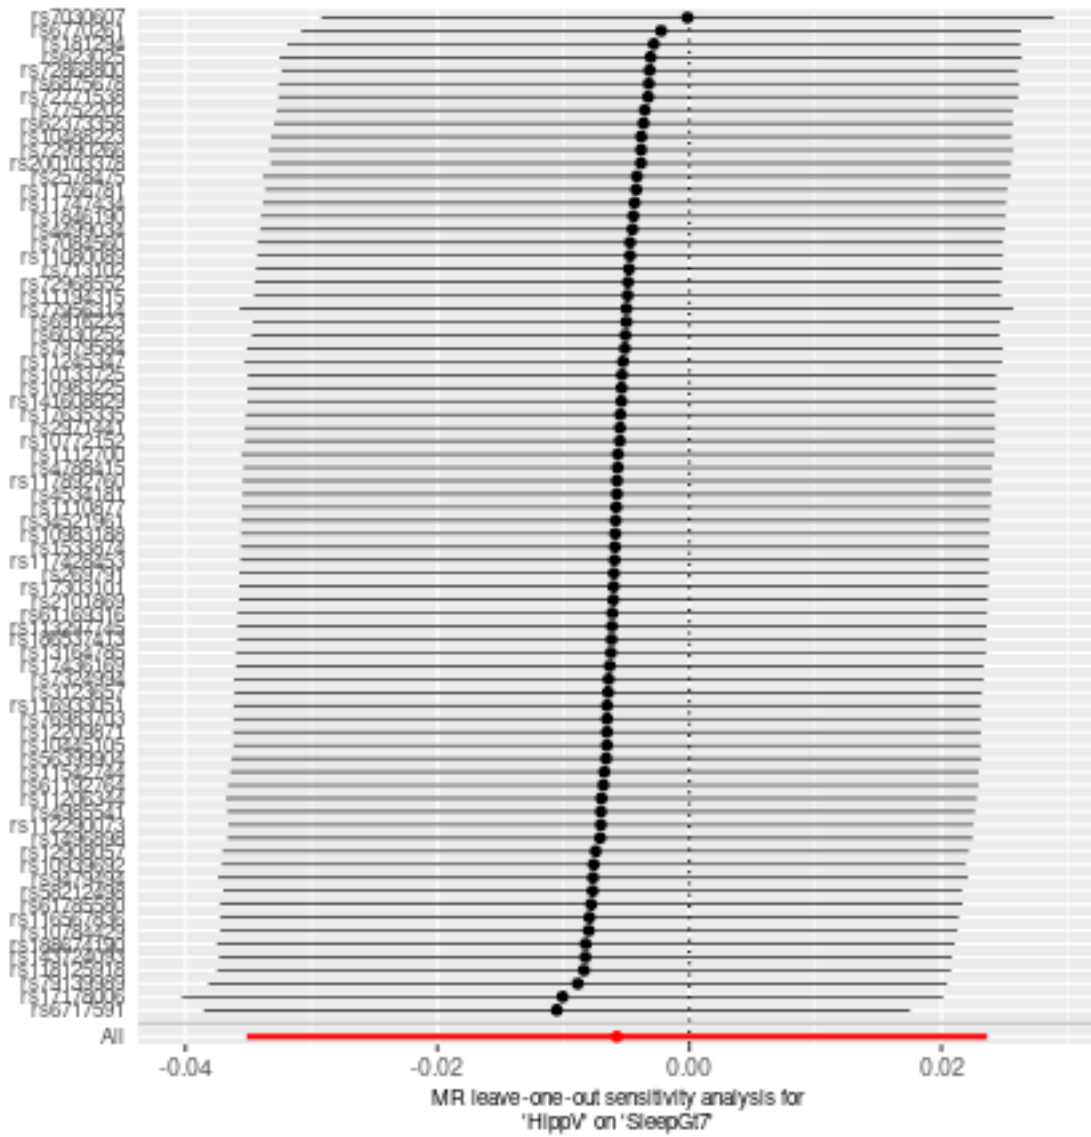

# Two sample MR report

---

HippV against SleepLe7 **P<10-6**

Date: 24 september, 2021

---

## Results from two sample MR:

| method                    | nsnp | b          | se        | pval      |
|---------------------------|------|------------|-----------|-----------|
| MR Egger                  | 76   | 0.0169608  | 0.0265944 | 0.5255981 |
| Weighted median           | 76   | 0.0014014  | 0.0156517 | 0.9286559 |
| Inverse variance weighted | 76   | 0.0105060  | 0.0104622 | 0.3152862 |
| Simple mode               | 76   | -0.0103722 | 0.0392096 | 0.7920952 |
| Weighted mode             | 76   | 0.0097953  | 0.0251273 | 0.6977701 |

---

## Heterogeneity tests

| method                    | Q        | Q_df | Q_pval    |
|---------------------------|----------|------|-----------|
| MR Egger                  | 80.97263 | 74   | 0.2707679 |
| Inverse variance weighted | 81.04907 | 75   | 0.2962110 |

---

## Test for directional horizontal pleiotropy

| egger_intercept | se        | pval    |
|-----------------|-----------|---------|
| -0.0003362      | 0.0012719 | 0.79228 |

---

## Test that the exposure is upstream of the outcome

| snp_r2.exposure | snp_r2.outcome | correct_causal_direction | steiger_pval |
|-----------------|----------------|--------------------------|--------------|
| 0.0937249       | 0.0004956      | TRUE                     | 0            |

---

Note - R<sup>2</sup> values are approximate

---



Forest plot of single SNP MR

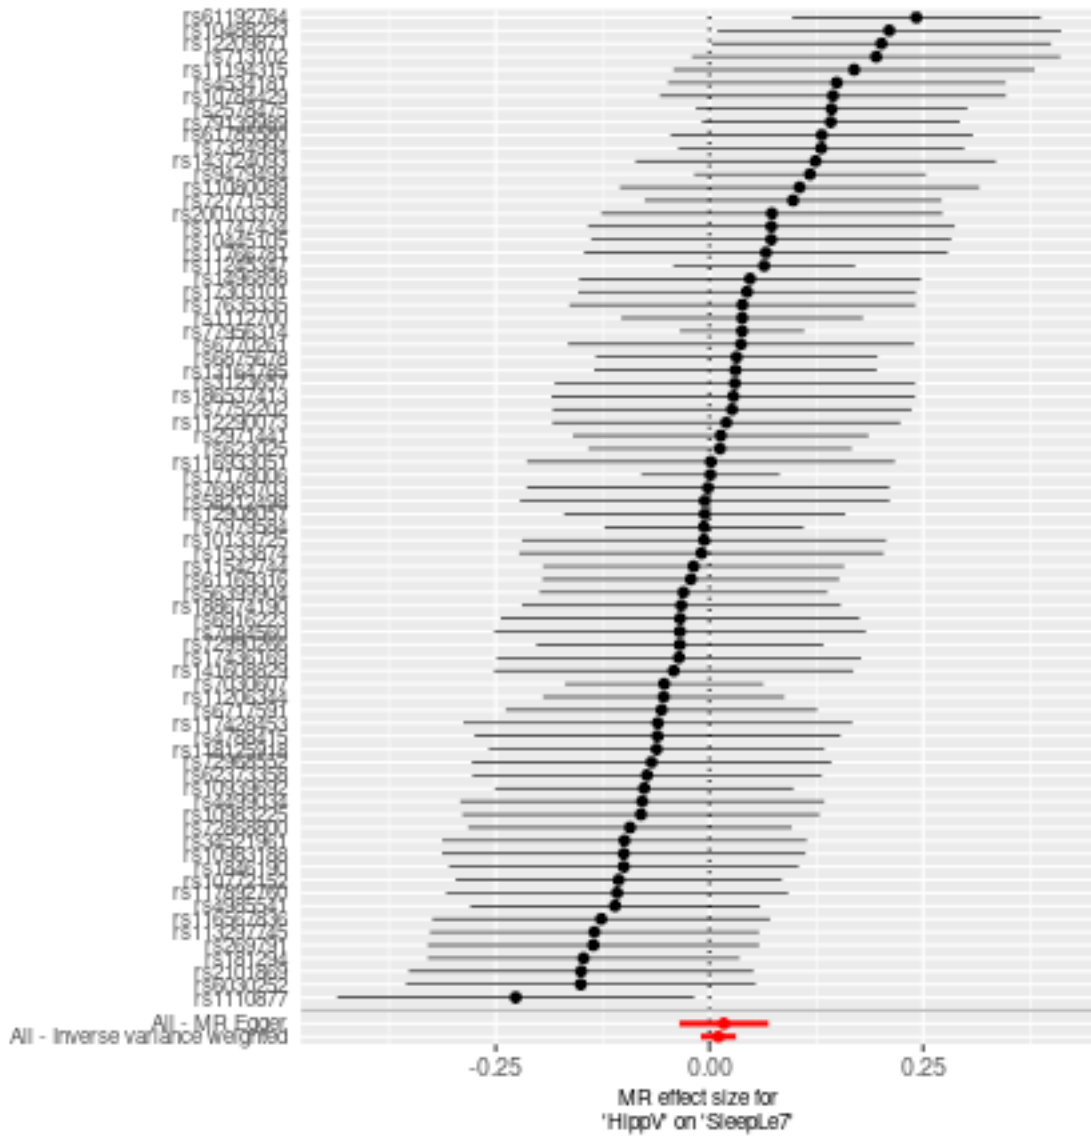

### Comparison of results using different MR methods

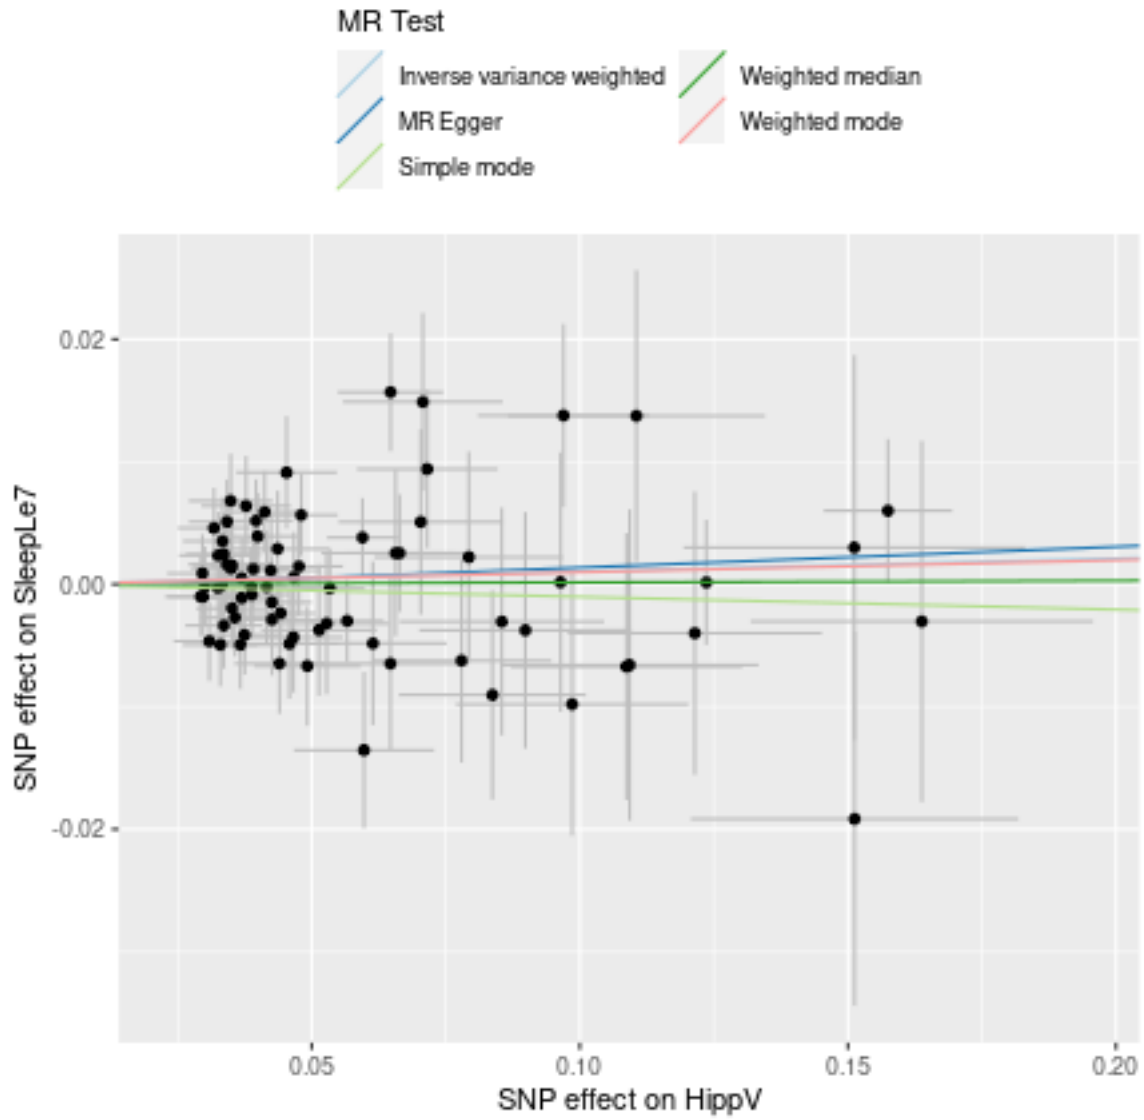

# Funnel plot

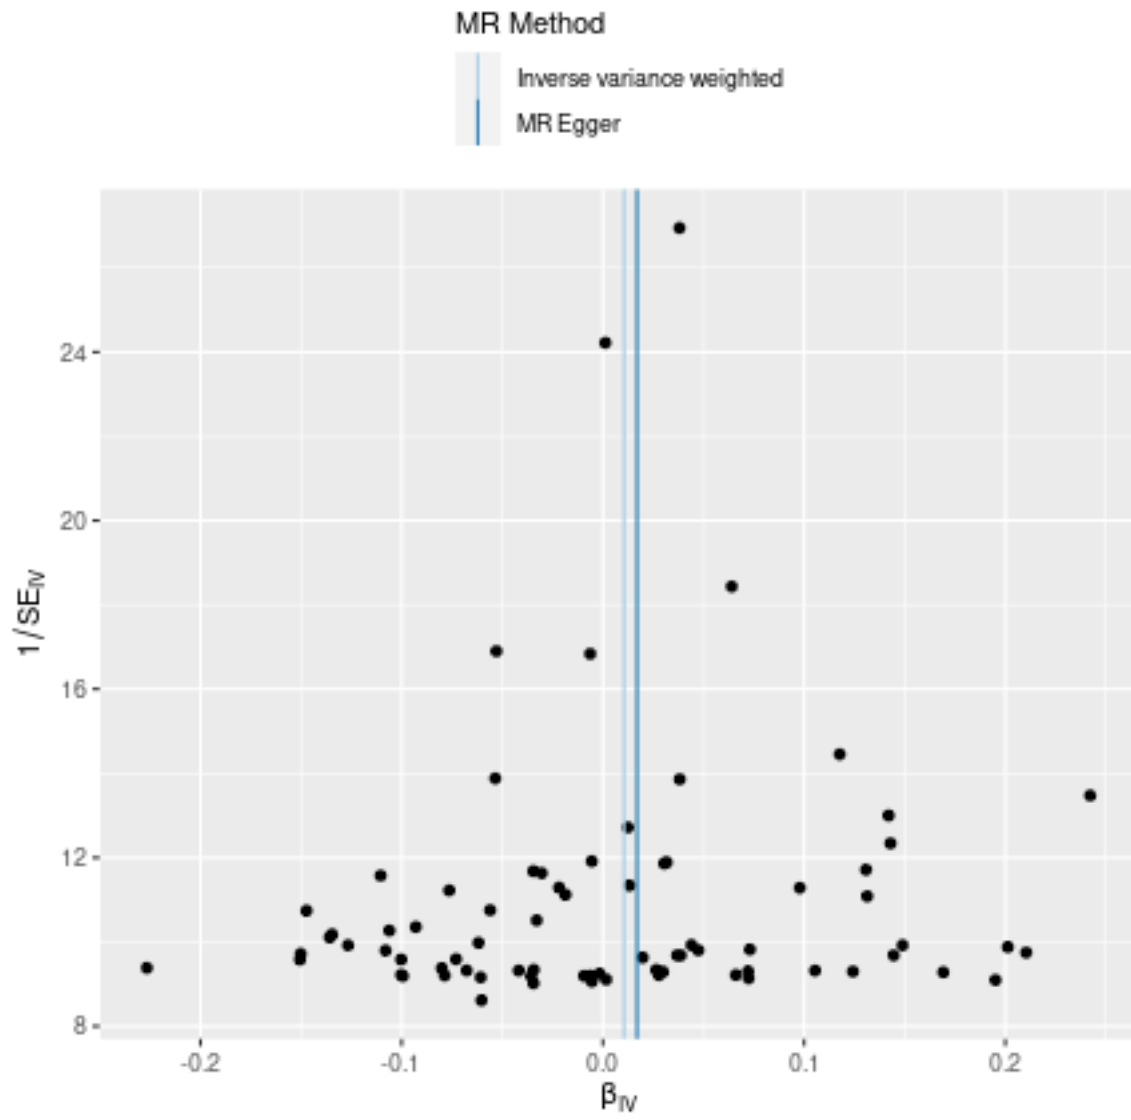

Leave-one-out sensitivity analysis

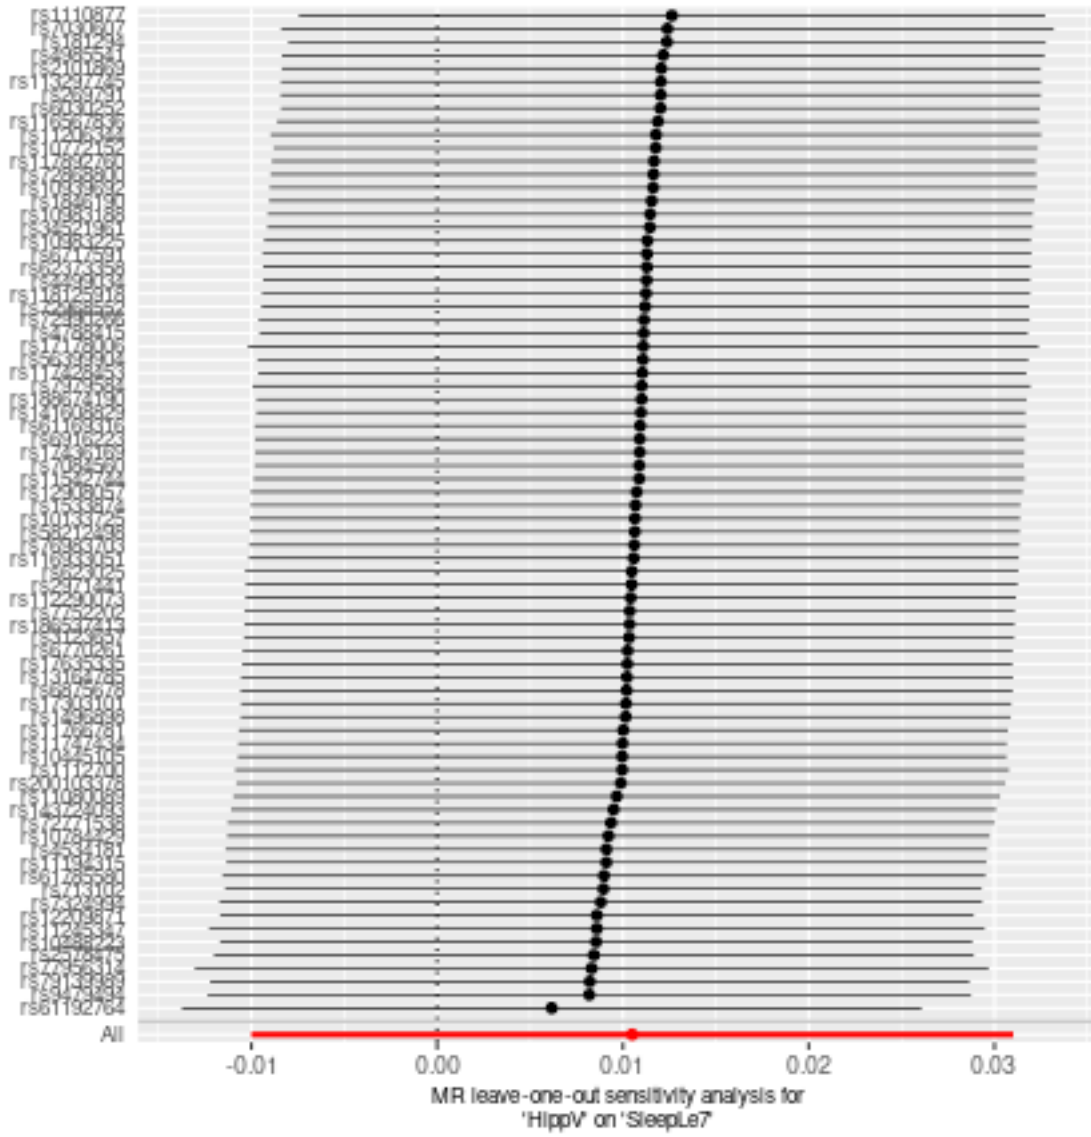

# Two sample MR report

---

ICV against SleepGt7

**P<10-6**

Date: 24 september, 2021

---

Results from two sample MR:

| method                    | nsnp | b          | se        | pval      |
|---------------------------|------|------------|-----------|-----------|
| MR Egger                  | 88   | 0.0339083  | 0.0396457 | 0.3947706 |
| Weighted median           | 88   | -0.0173681 | 0.0195531 | 0.3744033 |
| Inverse variance weighted | 88   | -0.0070838 | 0.0147017 | 0.6299251 |
| Simple mode               | 88   | -0.0274712 | 0.0485554 | 0.5730056 |
| Weighted mode             | 88   | -0.0150815 | 0.0406290 | 0.7113908 |

---

Heterogeneity tests

| method                    | Q        | Q_df | Q_pval    |
|---------------------------|----------|------|-----------|
| MR Egger                  | 113.5486 | 86   | 0.0249814 |
| Inverse variance weighted | 115.1845 | 87   | 0.0232427 |

---

Test for directional horizontal pleiotropy

| egger_intercept | se        | pval      |
|-----------------|-----------|-----------|
| -0.0021613      | 0.0019417 | 0.2687687 |

---

Test that the exposure is upstream of the outcome

| snp_r2.exposure | snp_r2.outcome | correct_causal_direction | steiger_pval |
|-----------------|----------------|--------------------------|--------------|
| 0.097292        | 0.001197       | TRUE                     | 0            |

---

Note - R<sup>2</sup> values are approximate

---

# Forest plot of single SNP MR

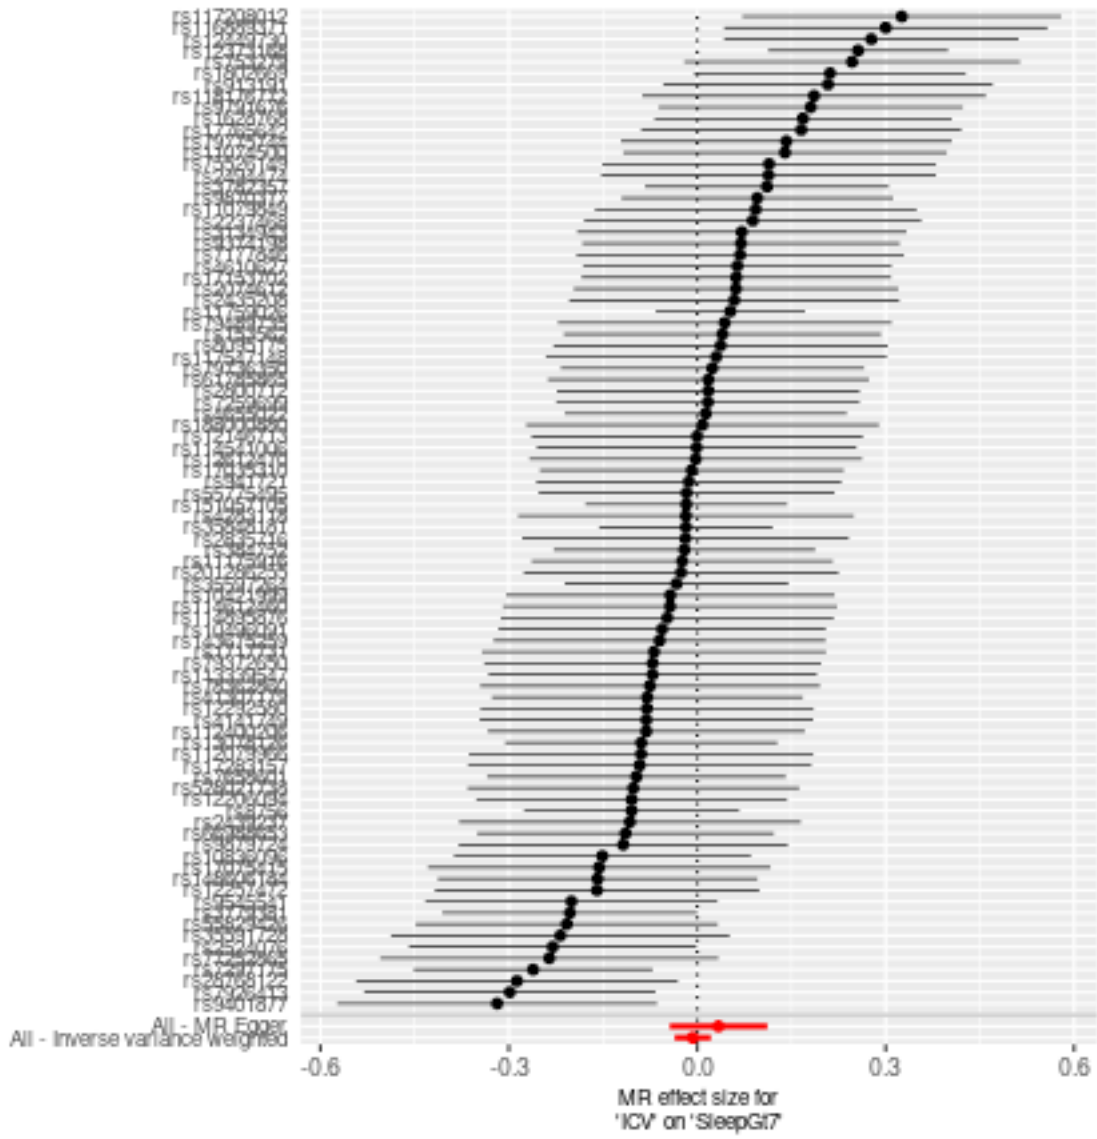

### Comparison of results using different MR methods

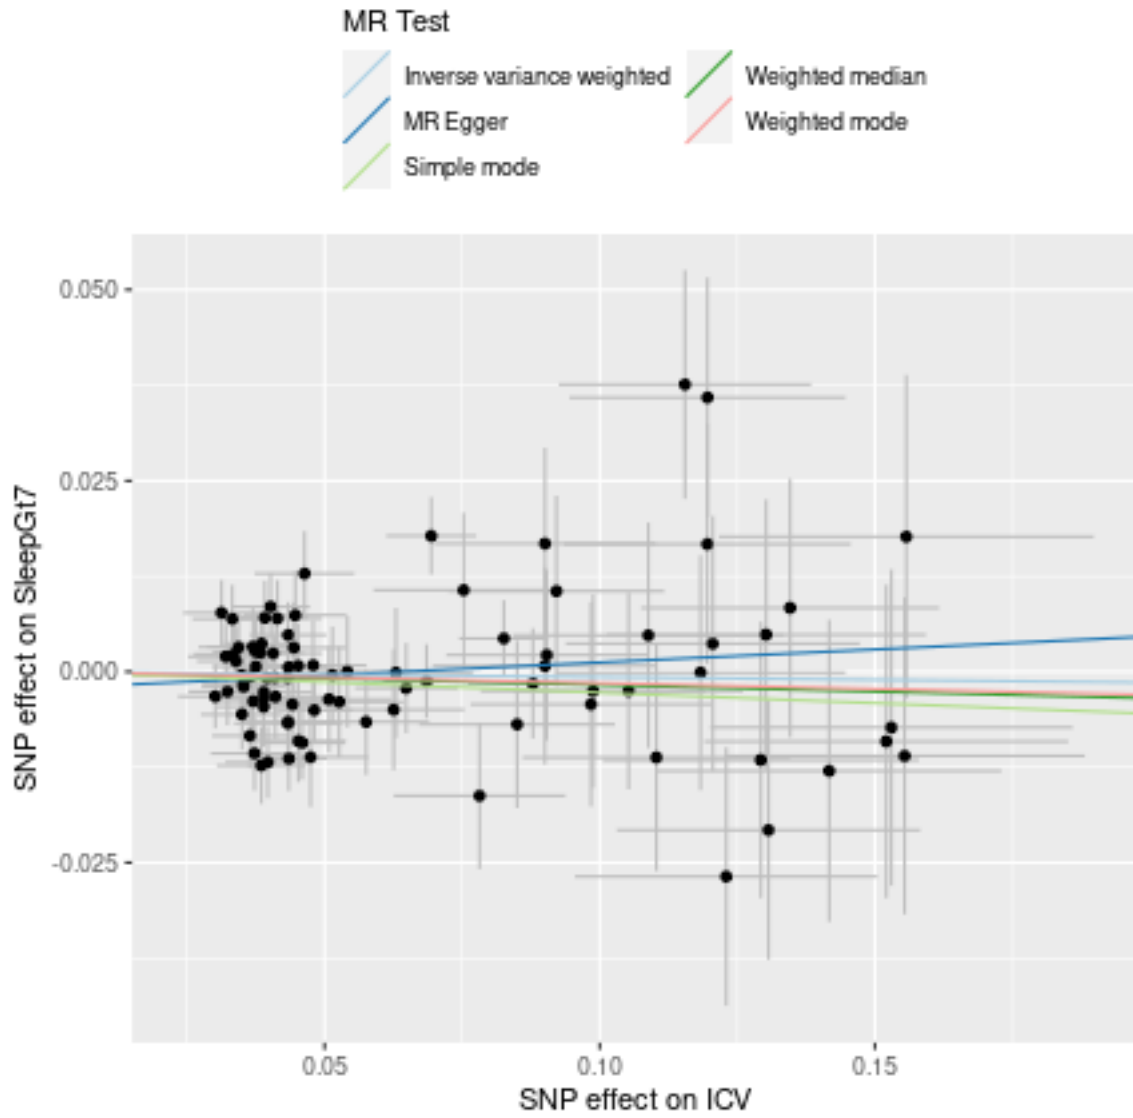

# Funnel plot

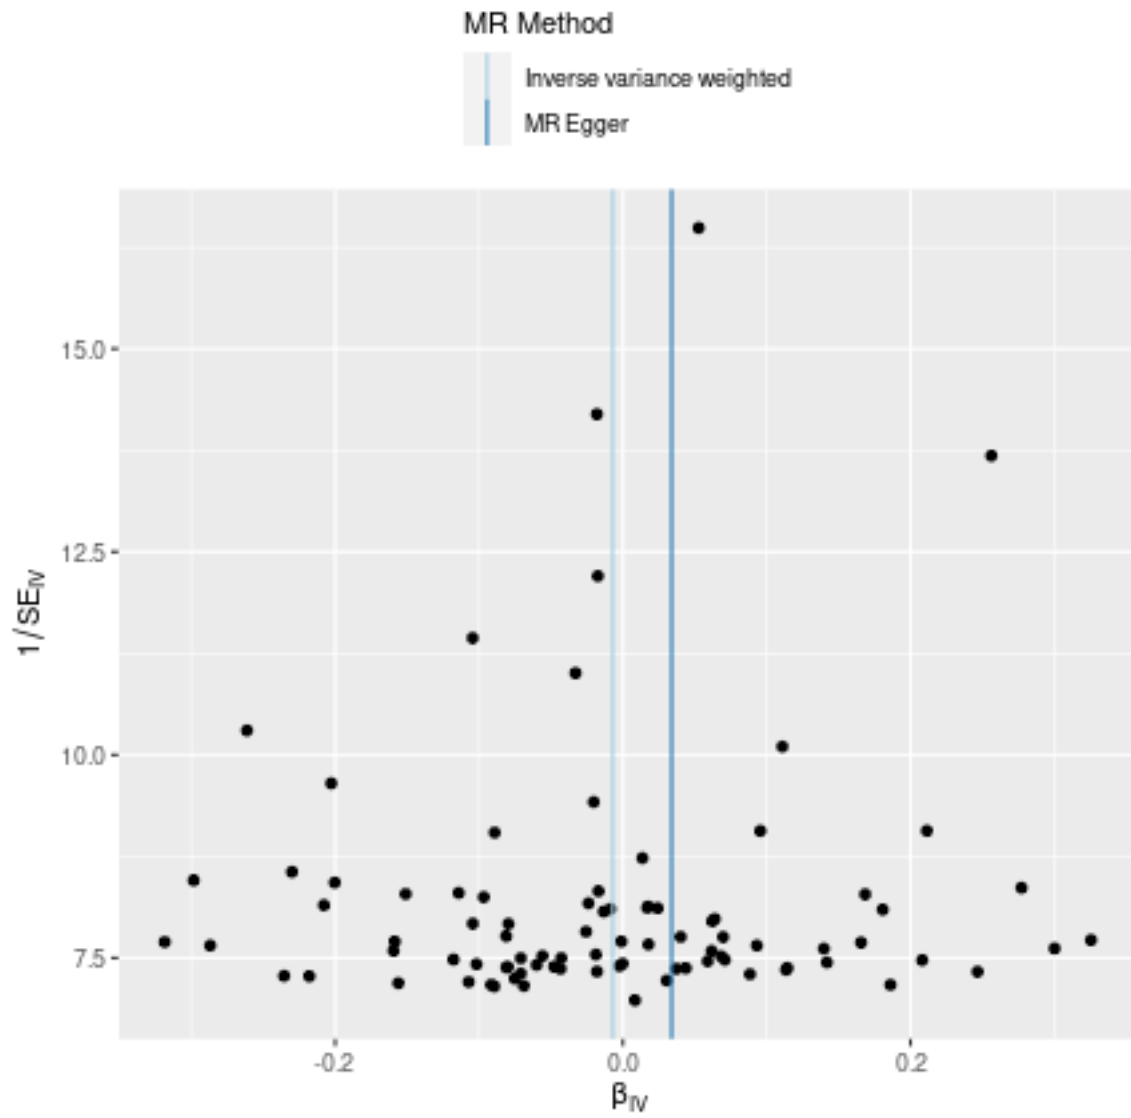



# Leave-one-out sensitivity analysis

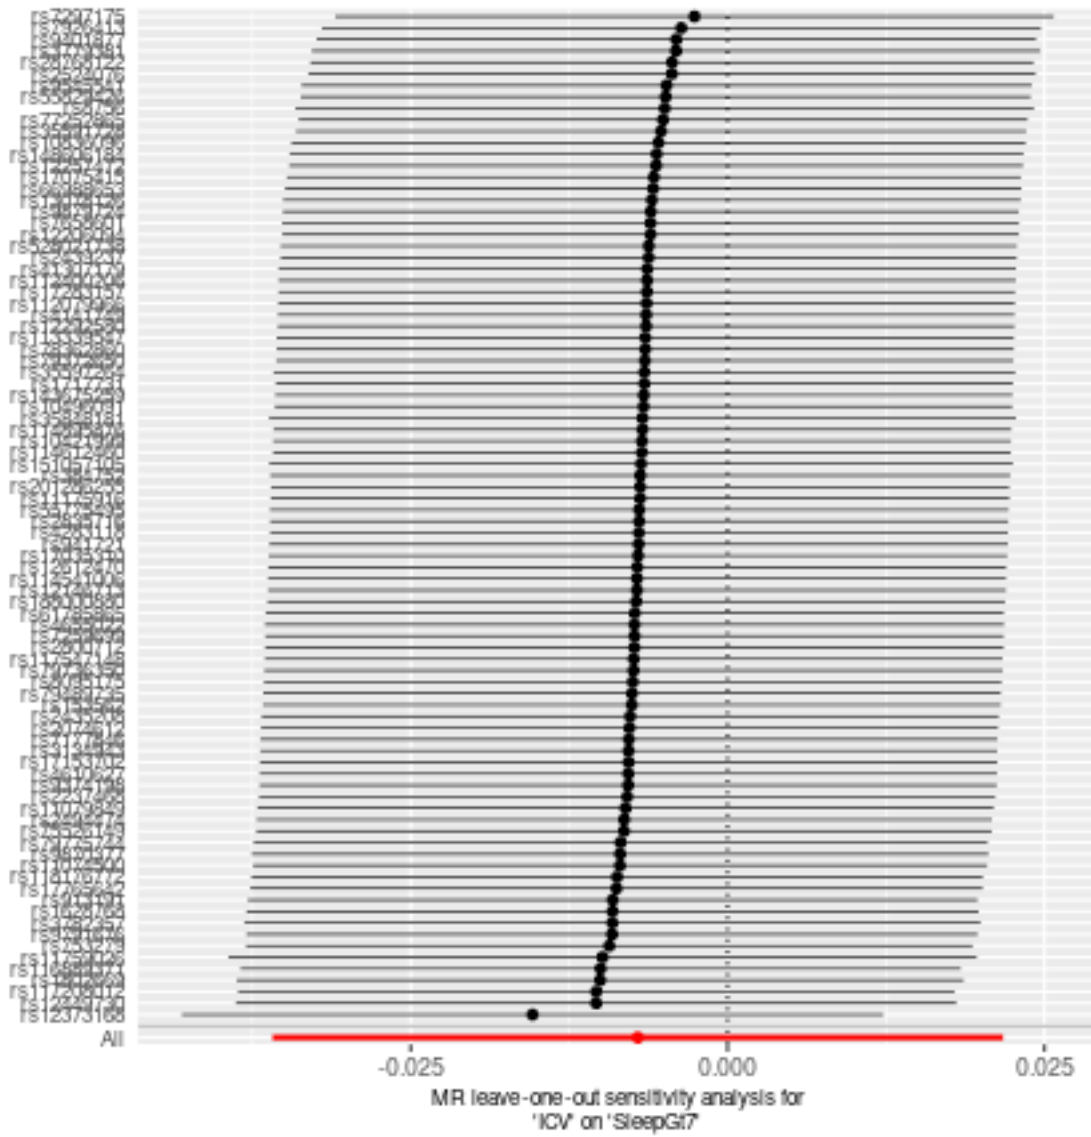

# Two sample MR report

---

## ICV against SleepLe7

Date: 24 september, 2021

**P<10-6**

---

### Results from two sample MR:

| method                    | nsnp | b          | se        | pval      |
|---------------------------|------|------------|-----------|-----------|
| MR Egger                  | 88   | -0.0023802 | 0.0318884 | 0.9406727 |
| Weighted median           | 88   | 0.0427685  | 0.0150103 | 0.0043818 |
| Inverse variance weighted | 88   | 0.0408021  | 0.0118785 | 0.0005926 |
| Simple mode               | 88   | 0.0482814  | 0.0384868 | 0.2130235 |
| Weighted mode             | 88   | 0.0414786  | 0.0337732 | 0.2227018 |

---

### Heterogeneity tests

| method                    | Q        | Q_df | Q_pval    |
|---------------------------|----------|------|-----------|
| MR Egger                  | 127.3433 | 86   | 0.0025303 |
| Inverse variance weighted | 130.4896 | 87   | 0.0017729 |

---

### Test for directional horizontal pleiotropy

| egger_intercept | se        | pval      |
|-----------------|-----------|-----------|
| 0.0022751       | 0.0015608 | 0.1485691 |

---

### Test that the exposure is upstream of the outcome

| snp_r2.exposure | snp_r2.outcome | correct_causal_direction | steiger_pval |
|-----------------|----------------|--------------------------|--------------|
| 0.097292        | 0.0008324      | TRUE                     | 0            |

---

Note - R<sup>2</sup> values are approximate

---

# Forest plot of single SNP MR

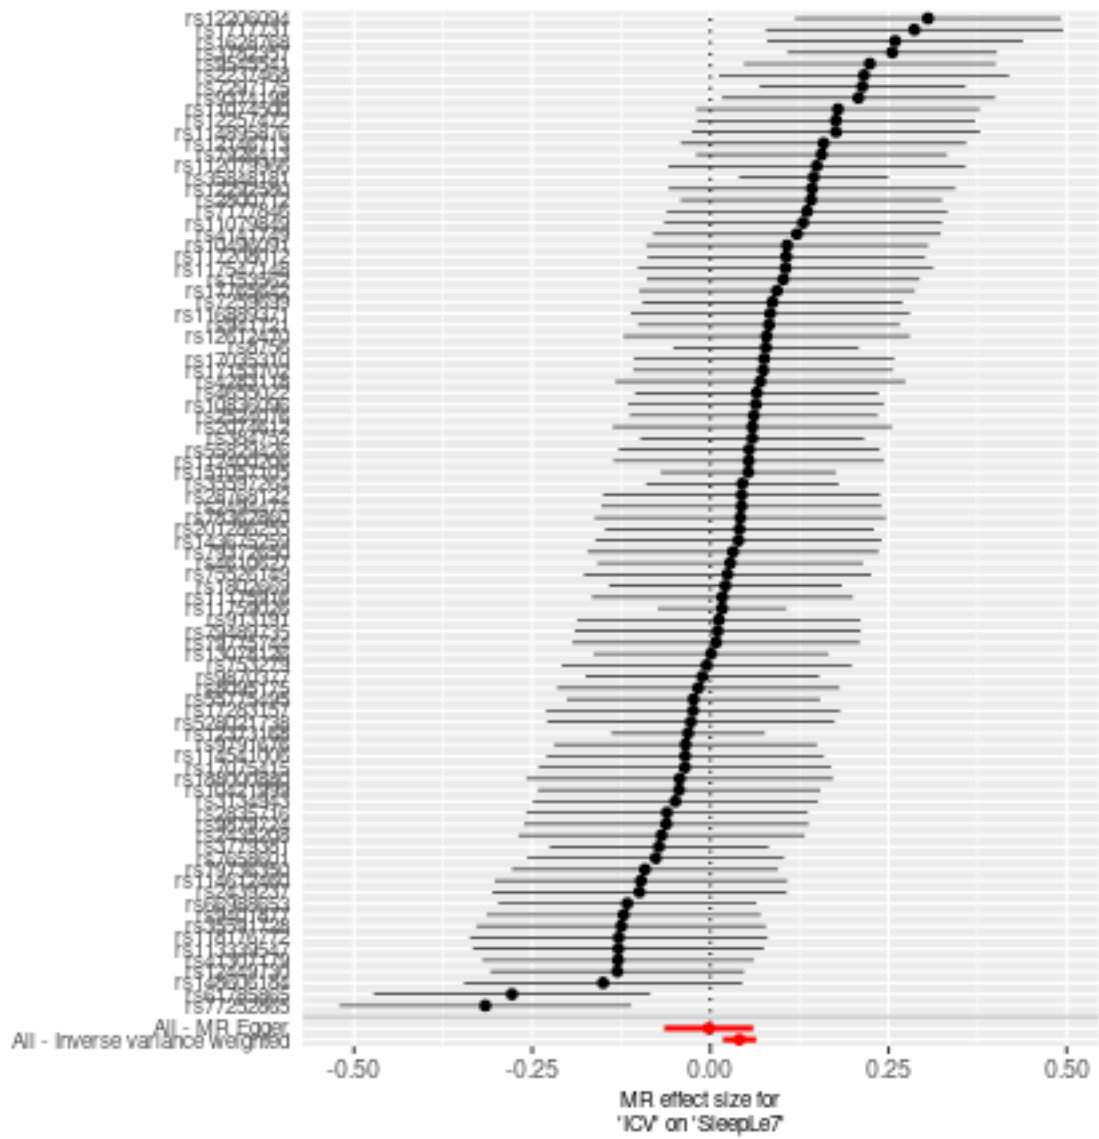

### Comparison of results using different MR methods

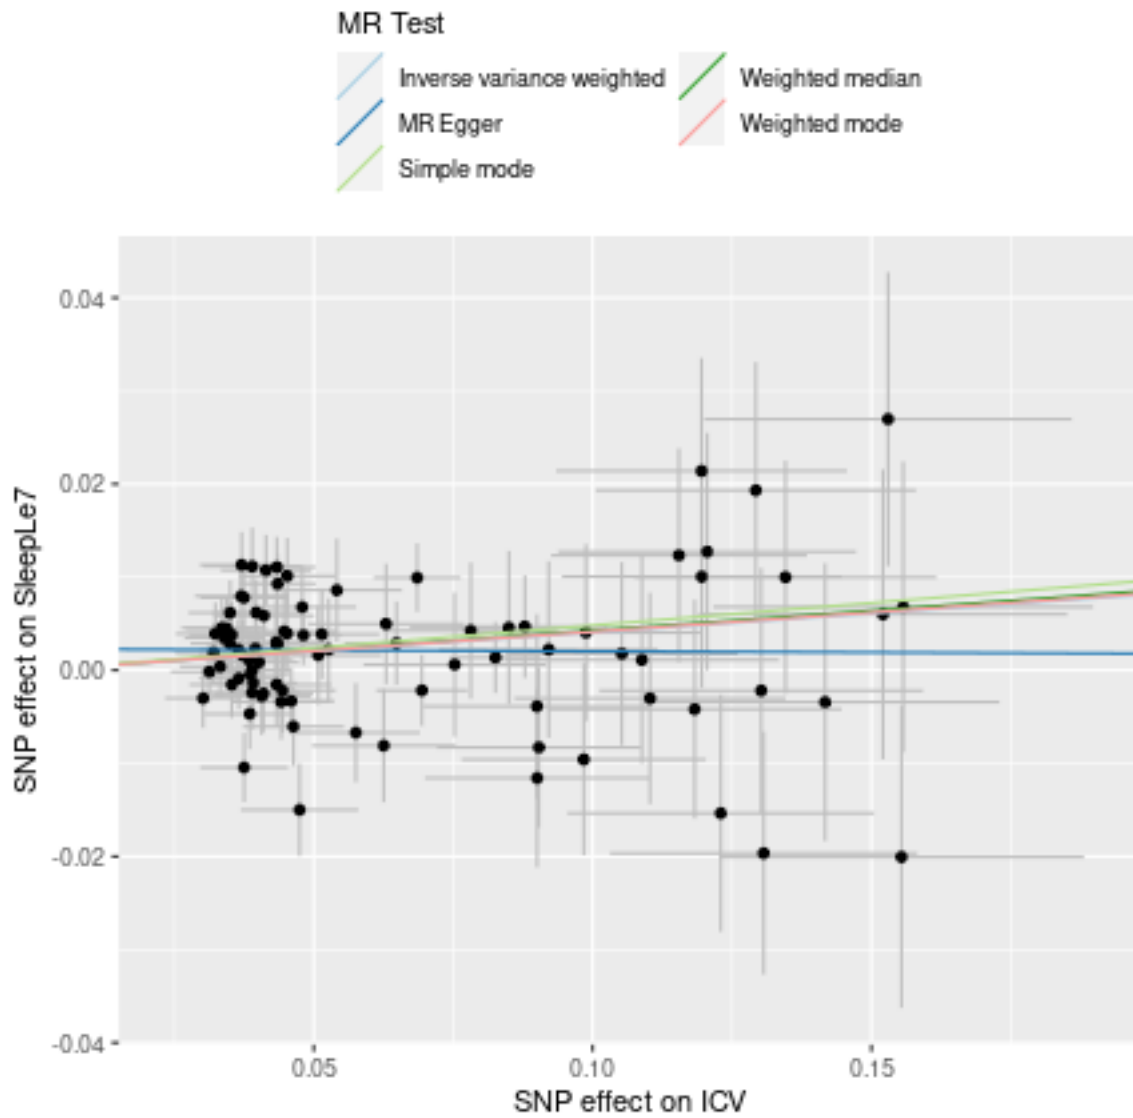

# Funnel plot

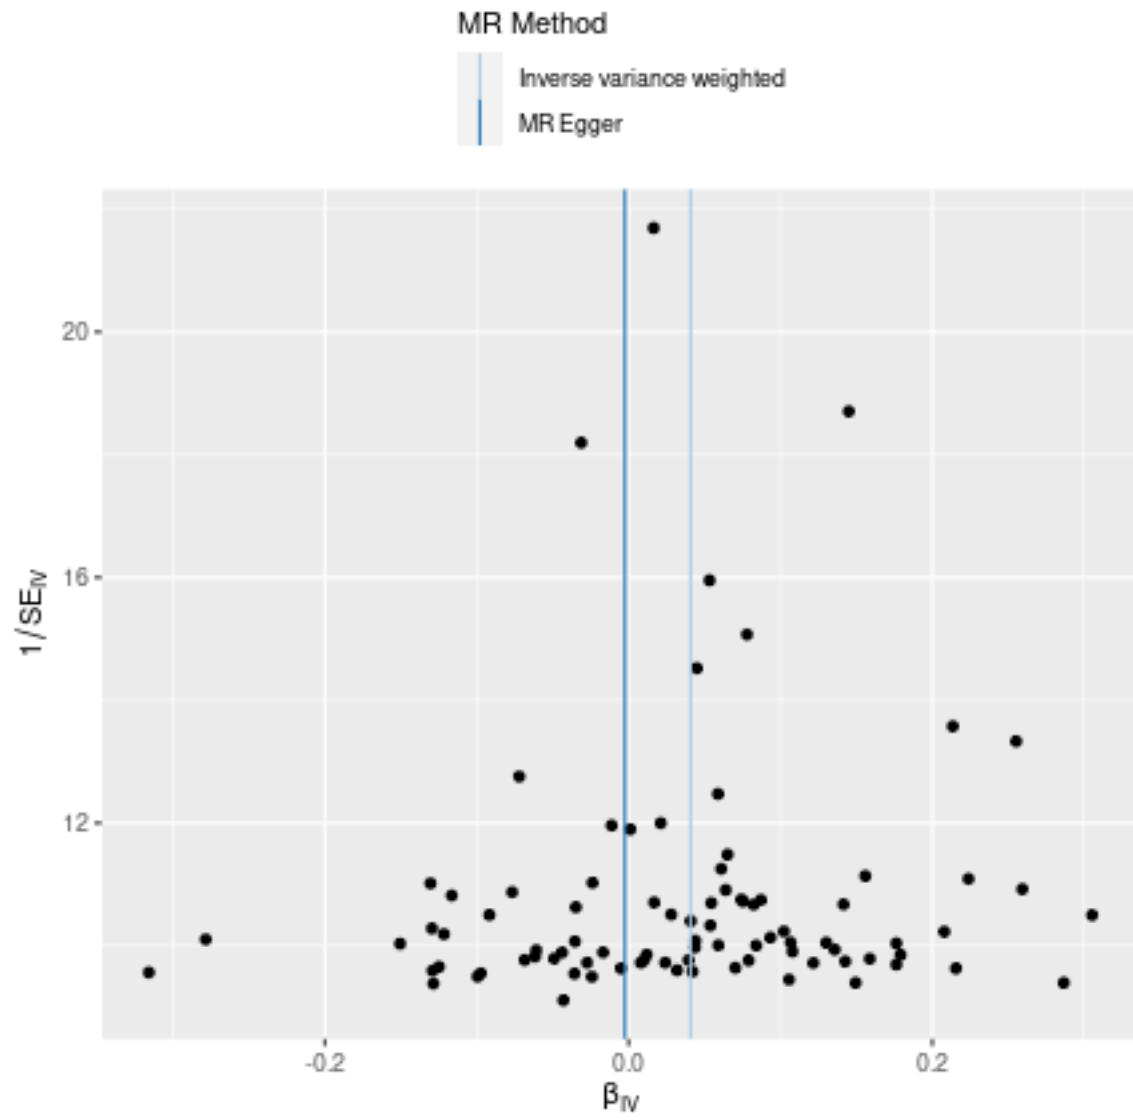

# Leave-one-out sensitivity analysis

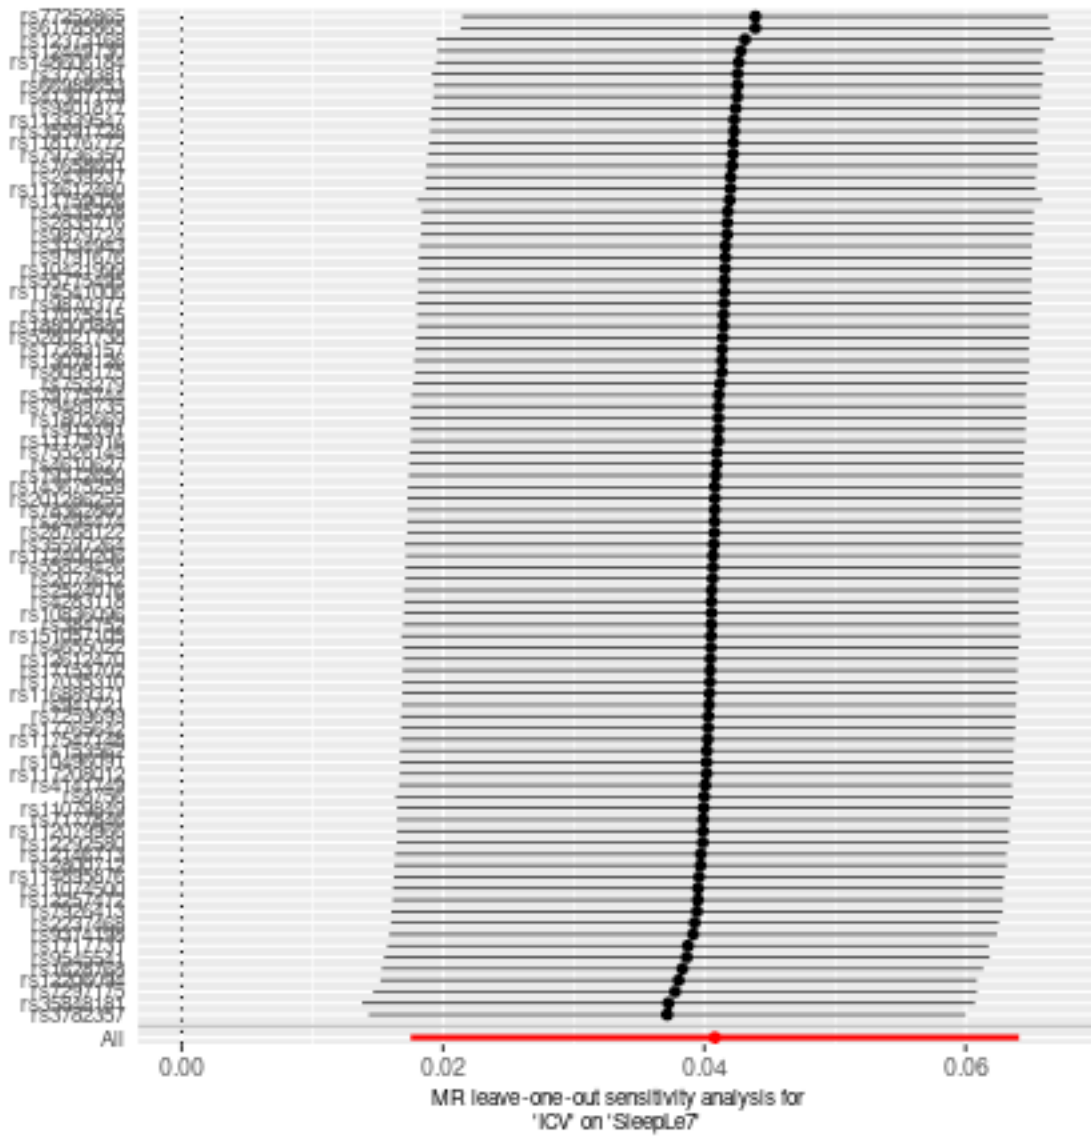

# Two sample MR report

---

SleepGt7 against HippV

**P<10-6**

Date: 24 september, 2021

---

Results from two sample MR:

| method                    | nsnp | b          | se        | pval      |
|---------------------------|------|------------|-----------|-----------|
| MR Egger                  | 21   | -0.0925011 | 0.1512298 | 0.5480129 |
| Weighted median           | 21   | -0.0458650 | 0.1029470 | 0.6559435 |
| Inverse variance weighted | 21   | -0.0746943 | 0.0728970 | 0.3055257 |
| Simple mode               | 21   | -0.0566075 | 0.1817977 | 0.7587370 |
| Weighted mode             | 21   | -0.0606288 | 0.1772525 | 0.7358833 |

---

Heterogeneity tests

| method                    | Q        | Q_df | Q_pval    |
|---------------------------|----------|------|-----------|
| MR Egger                  | 16.35114 | 19   | 0.6337366 |
| Inverse variance weighted | 16.36920 | 20   | 0.6934719 |

---

Test for directional horizontal pleiotropy

| egger_intercept | se        | pval      |
|-----------------|-----------|-----------|
| 0.0006559       | 0.0048807 | 0.8945073 |

---

Test that the exposure is upstream of the outcome

| snp_r2.exposure | snp_r2.outcome | correct_causal_direction | steiger_pval |
|-----------------|----------------|--------------------------|--------------|
| 0.0052712       | 0.0010812      | TRUE                     | 0            |

---

Note - R<sup>2</sup> values are approximate

---

### Forest plot of single SNP MR

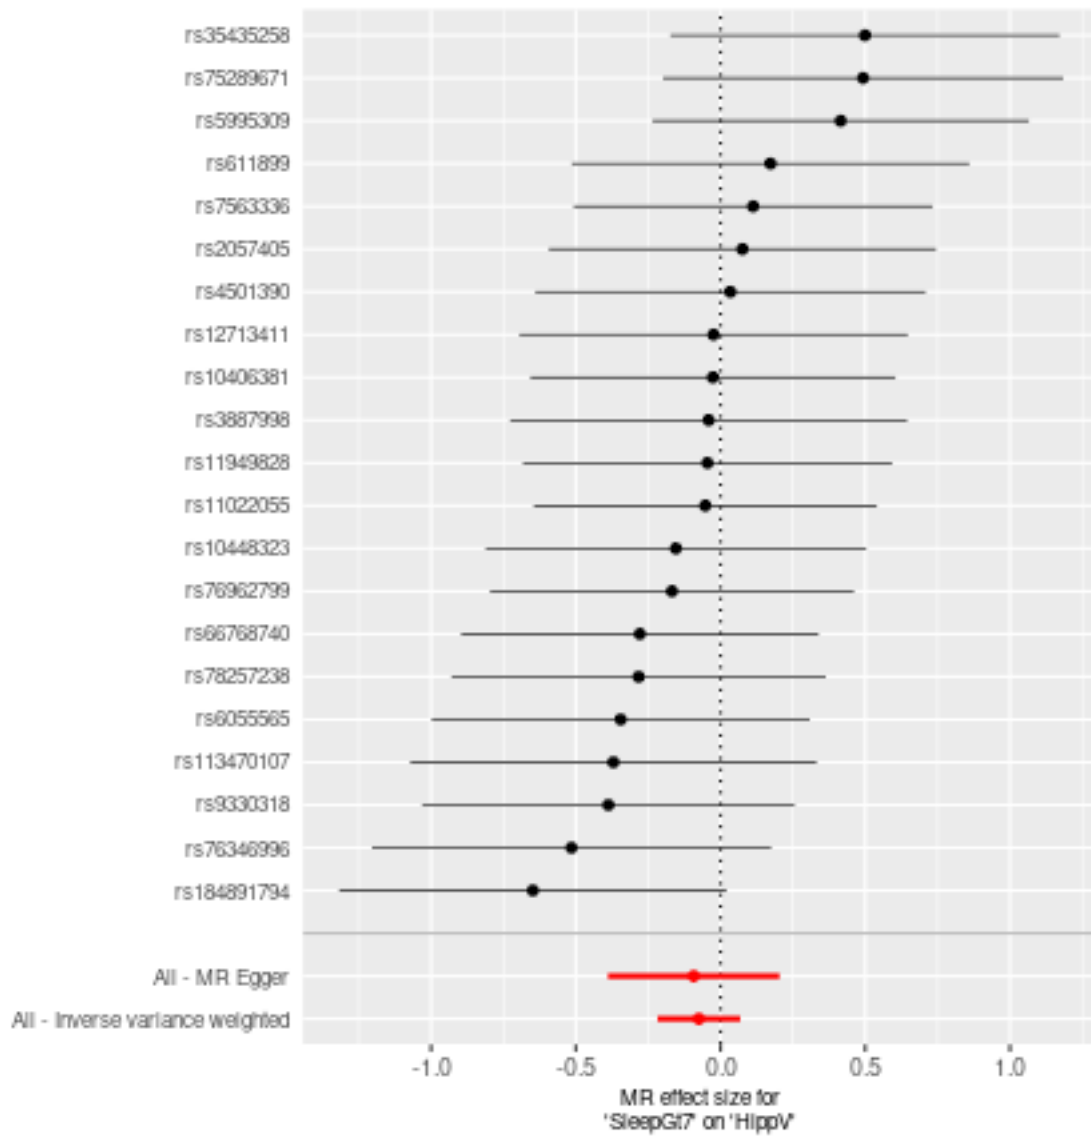



### Comparison of results using different MR methods

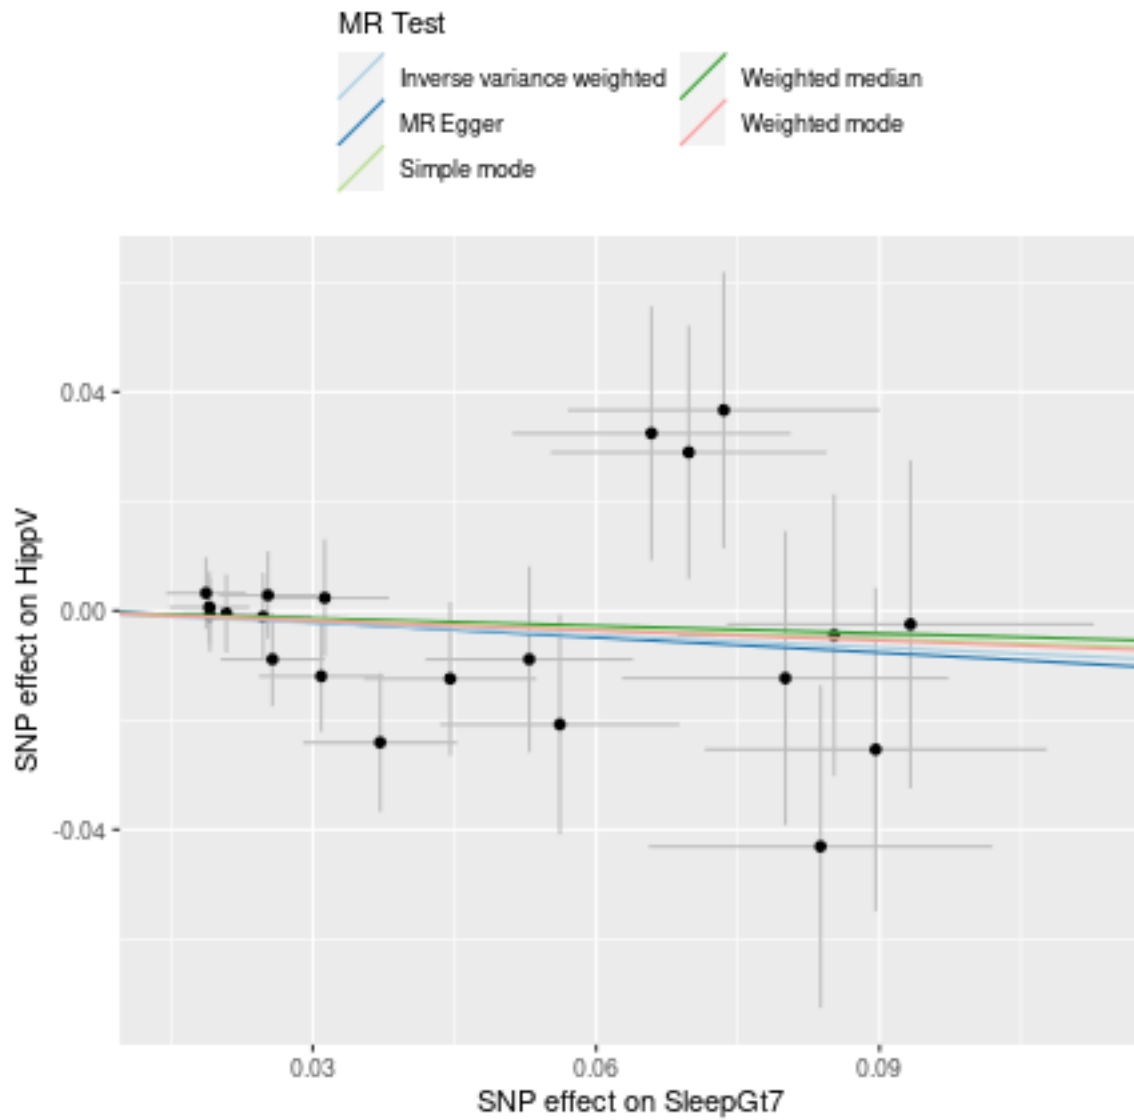

# Funnel plot

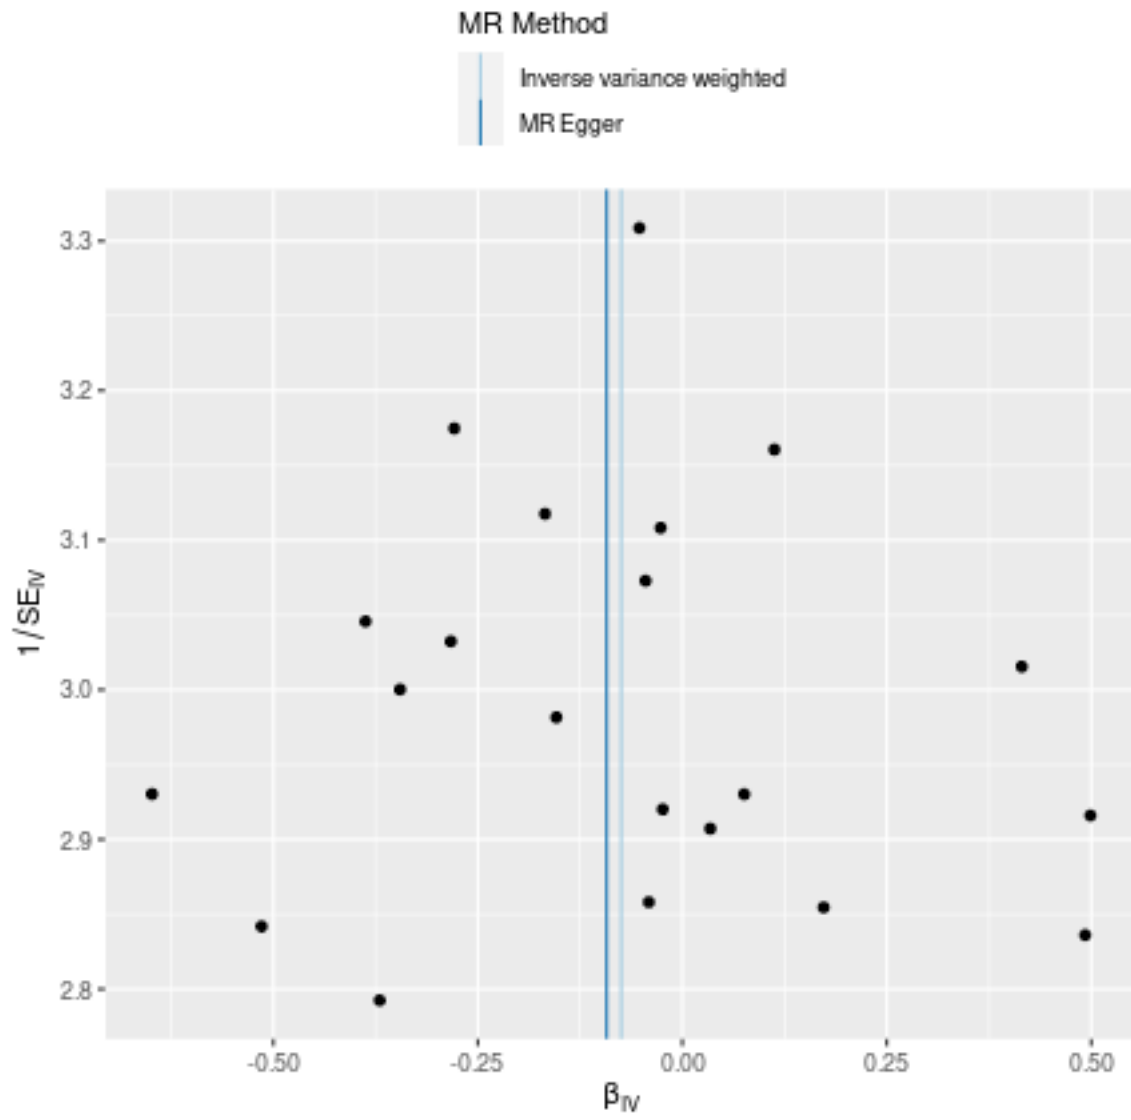

## Leave-one-out sensitivity analysis

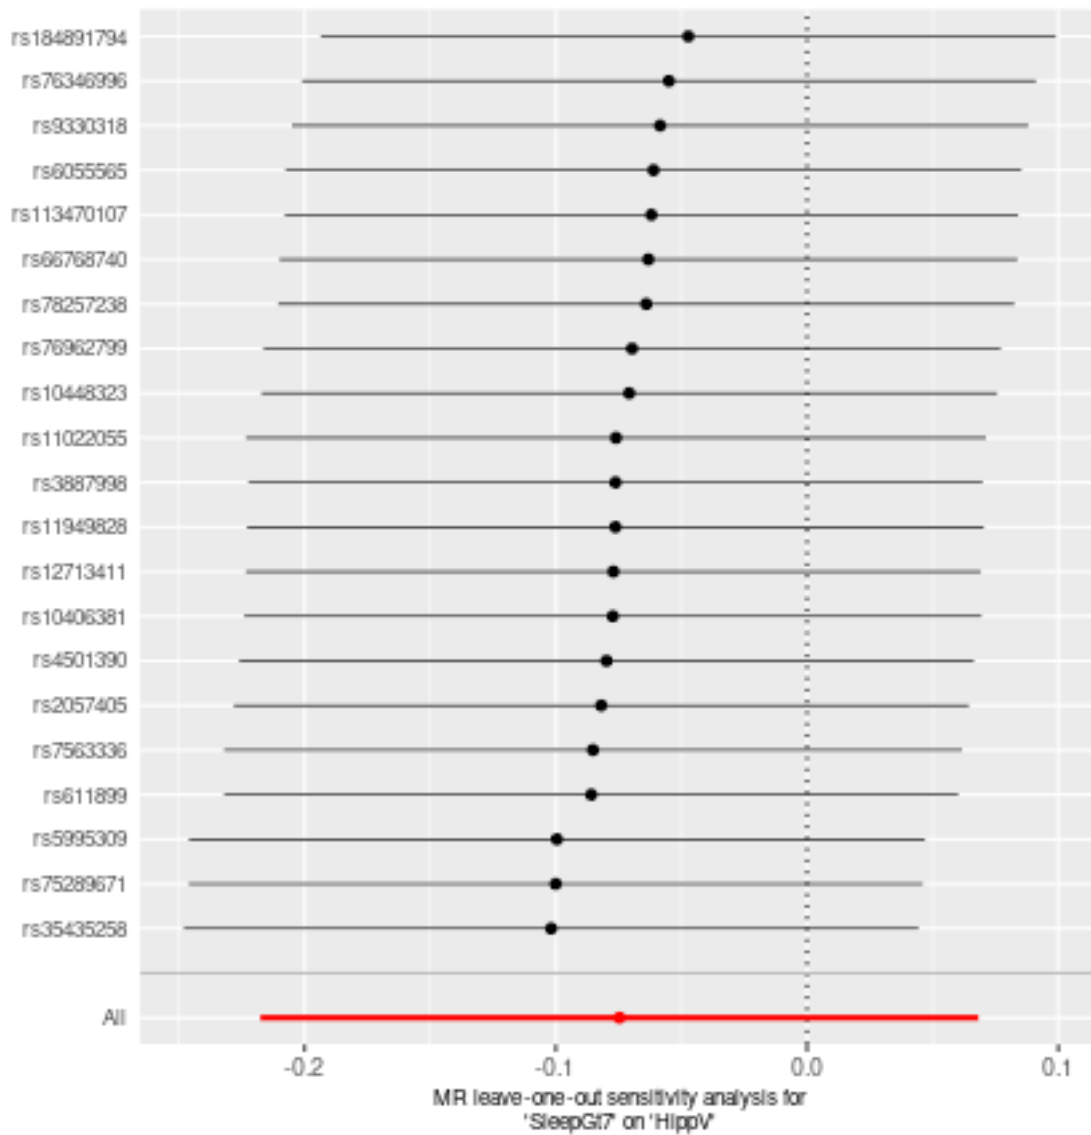

# Two sample MR report

---

SleepGt7 against ICV

**P<10-6**

Date: 24 september, 2021

---

Results from two sample MR:

| method                    | nsnp | b          | se        | pval      |
|---------------------------|------|------------|-----------|-----------|
| MR Egger                  | 21   | -0.0290303 | 0.1581733 | 0.8563230 |
| Weighted median           | 21   | -0.0036594 | 0.1063354 | 0.9725472 |
| Inverse variance weighted | 21   | 0.0243909  | 0.0760816 | 0.7485224 |
| Simple mode               | 21   | 0.0004752  | 0.1914223 | 0.9980439 |
| Weighted mode             | 21   | -0.0031448 | 0.1987966 | 0.9875353 |

---

Heterogeneity tests

| method                    | Q        | Q_df | Q_pval    |
|---------------------------|----------|------|-----------|
| MR Egger                  | 12.19716 | 19   | 0.8770258 |
| Inverse variance weighted | 12.34556 | 20   | 0.9036687 |

---

Test for directional horizontal pleiotropy

| egger_intercept | se        | pval      |
|-----------------|-----------|-----------|
| 0.0019644       | 0.0050993 | 0.7043465 |

---

Test that the exposure is upstream of the outcome

| snp_r2.exposure | snp_r2.outcome | correct_causal_direction | steiger_pval |
|-----------------|----------------|--------------------------|--------------|
| 0.0052712       | 0.0005336      | TRUE                     | 0            |

---

Note - R<sup>2</sup> values are approximate

---

### Forest plot of single SNP MR

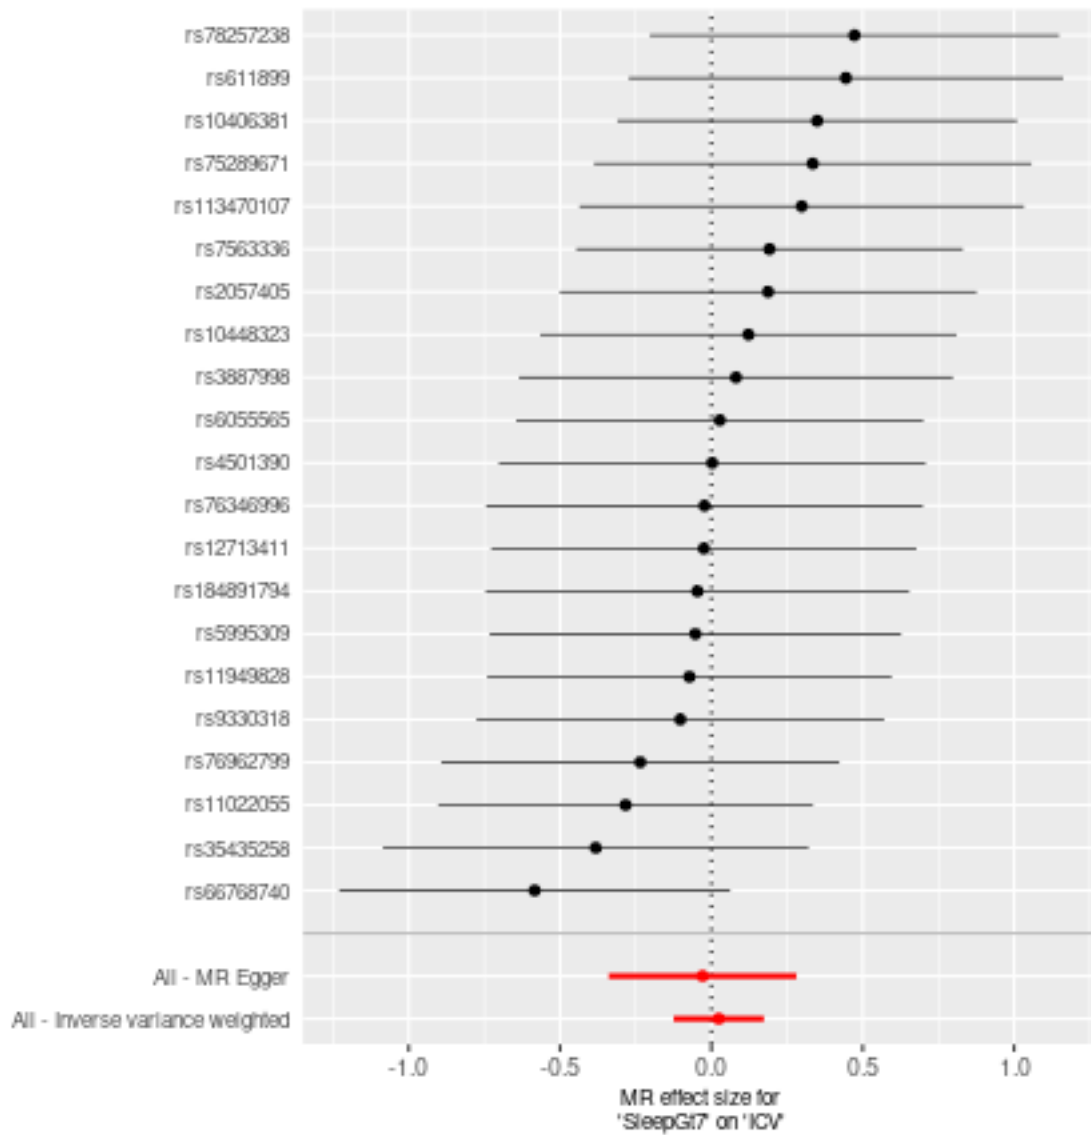

### Comparison of results using different MR methods

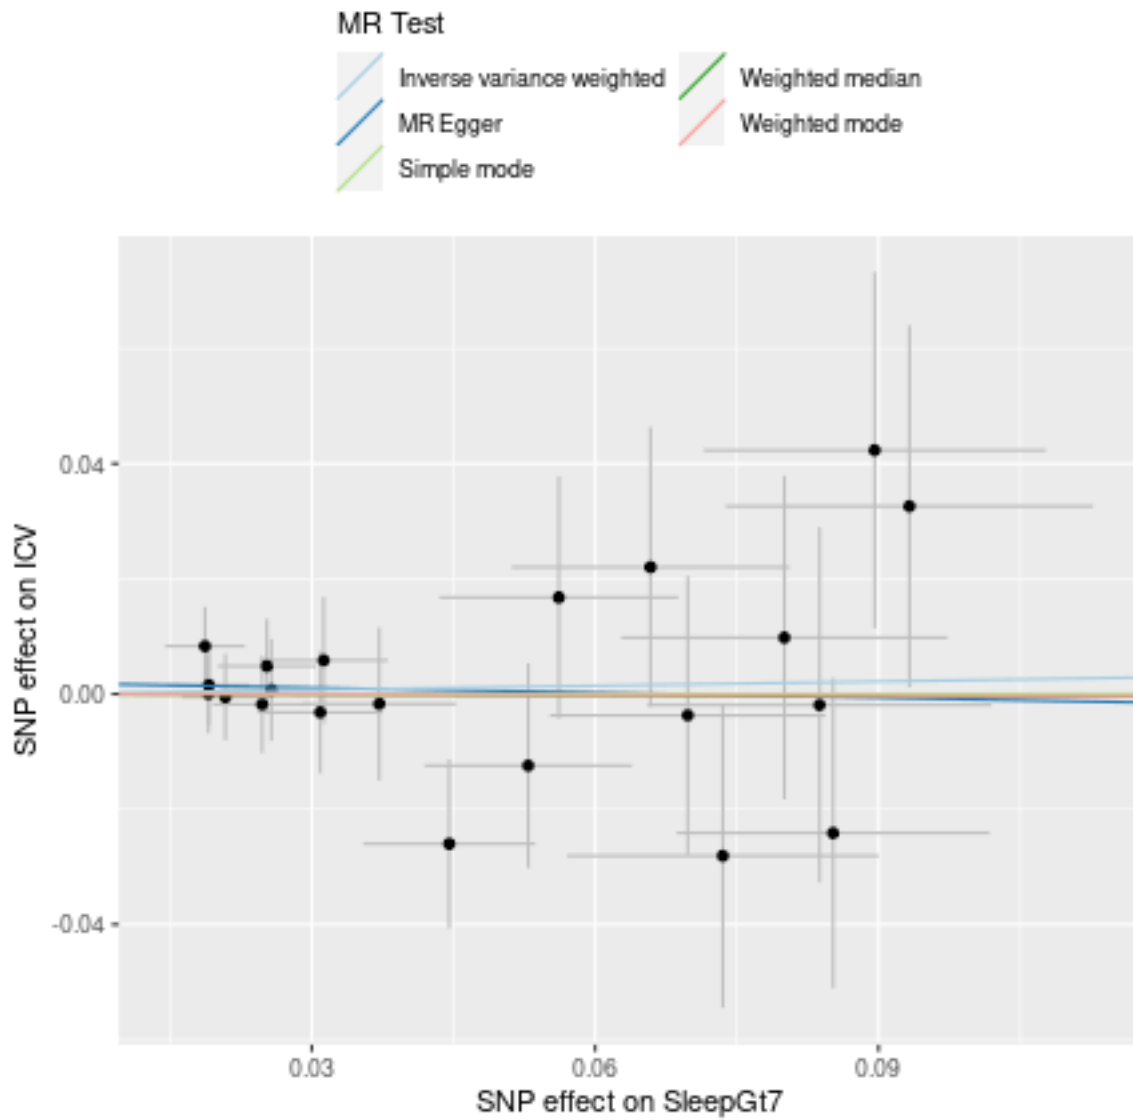

# Funnel plot

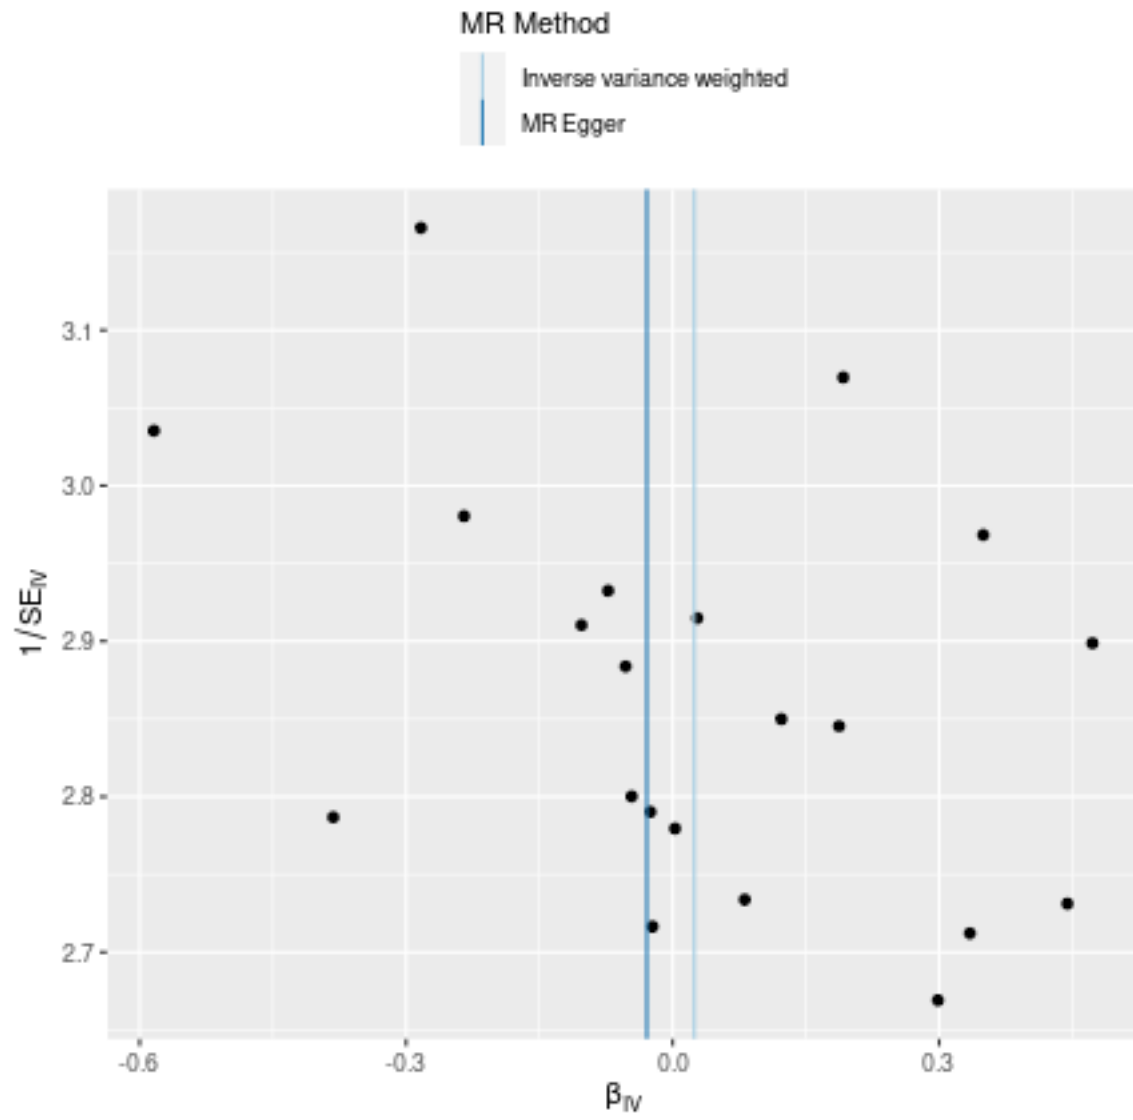

## Leave-one-out sensitivity analysis

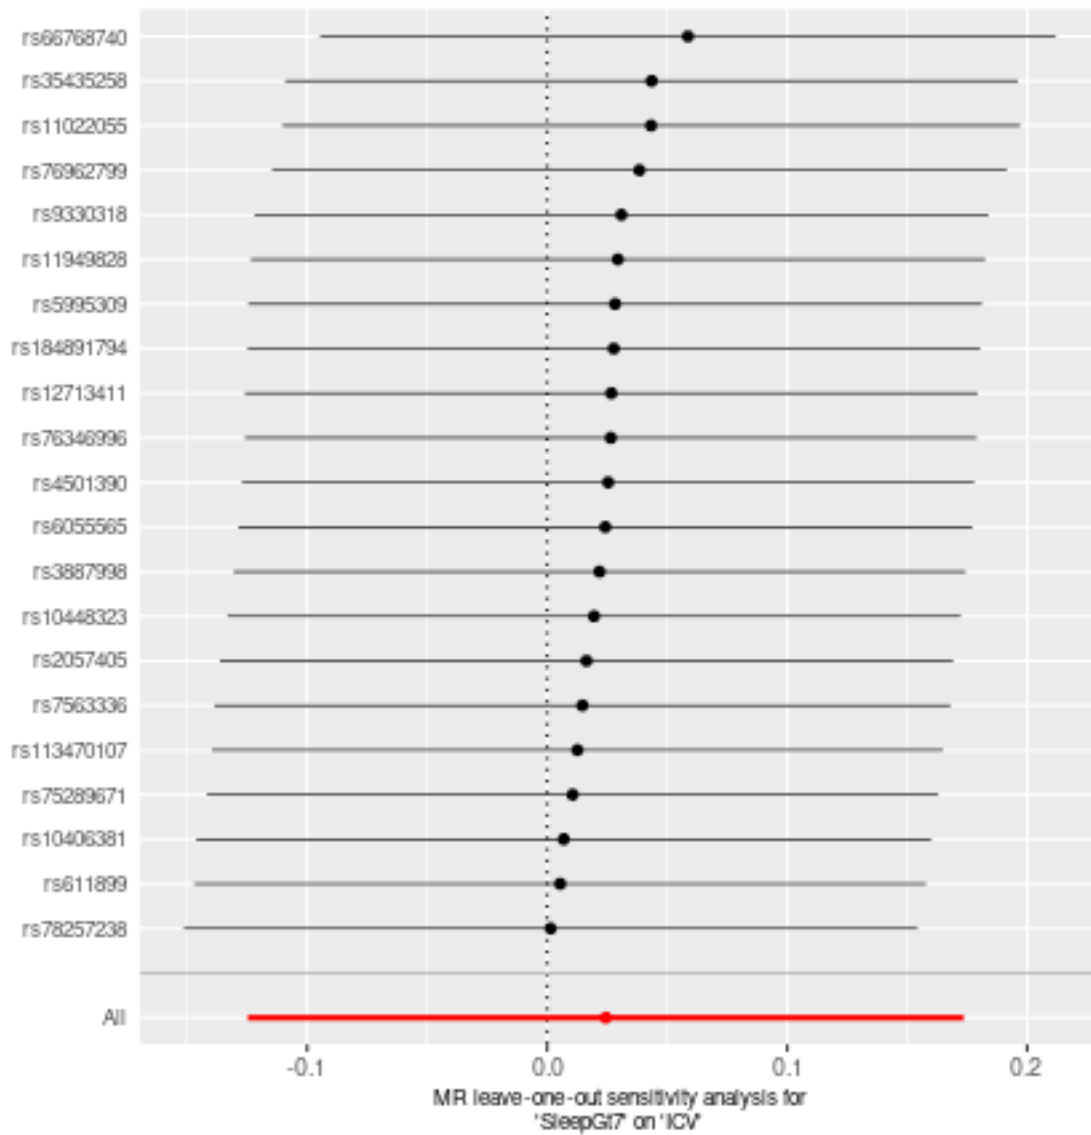



# Two sample MR report

---

SleepGt7 against TGV

**P<10-6**

Date: 24 september, 2021

---

Results from two sample MR:

| method                    | nsnp | b          | se        | pval      |
|---------------------------|------|------------|-----------|-----------|
| MR Egger                  | 21   | -0.1411426 | 0.0960387 | 0.1580233 |
| Weighted median           | 21   | -0.0374634 | 0.0657610 | 0.5688877 |
| Inverse variance weighted | 21   | -0.0540507 | 0.0461293 | 0.2413081 |
| Simple mode               | 21   | 0.0416703  | 0.1285359 | 0.7491586 |
| Weighted mode             | 21   | 0.0566952  | 0.1393968 | 0.6885346 |

---

Heterogeneity tests

| method                    | Q        | Q_df | Q_pval    |
|---------------------------|----------|------|-----------|
| MR Egger                  | 16.74293 | 19   | 0.6072791 |
| Inverse variance weighted | 17.81191 | 20   | 0.5997972 |

---

Test for directional horizontal pleiotropy

| egger_intercept | se        | pval      |
|-----------------|-----------|-----------|
| 0.0031989       | 0.0030939 | 0.3141566 |

---

Test that the exposure is upstream of the outcome

| snp_r2.exposure | snp_r2.outcome | correct_causal_direction | steiger_pval |
|-----------------|----------------|--------------------------|--------------|
| 0.0052712       | 0.0010403      | TRUE                     | 0            |

---

Note - R<sup>2</sup> values are approximate

---

Forest plot of single SNP MR

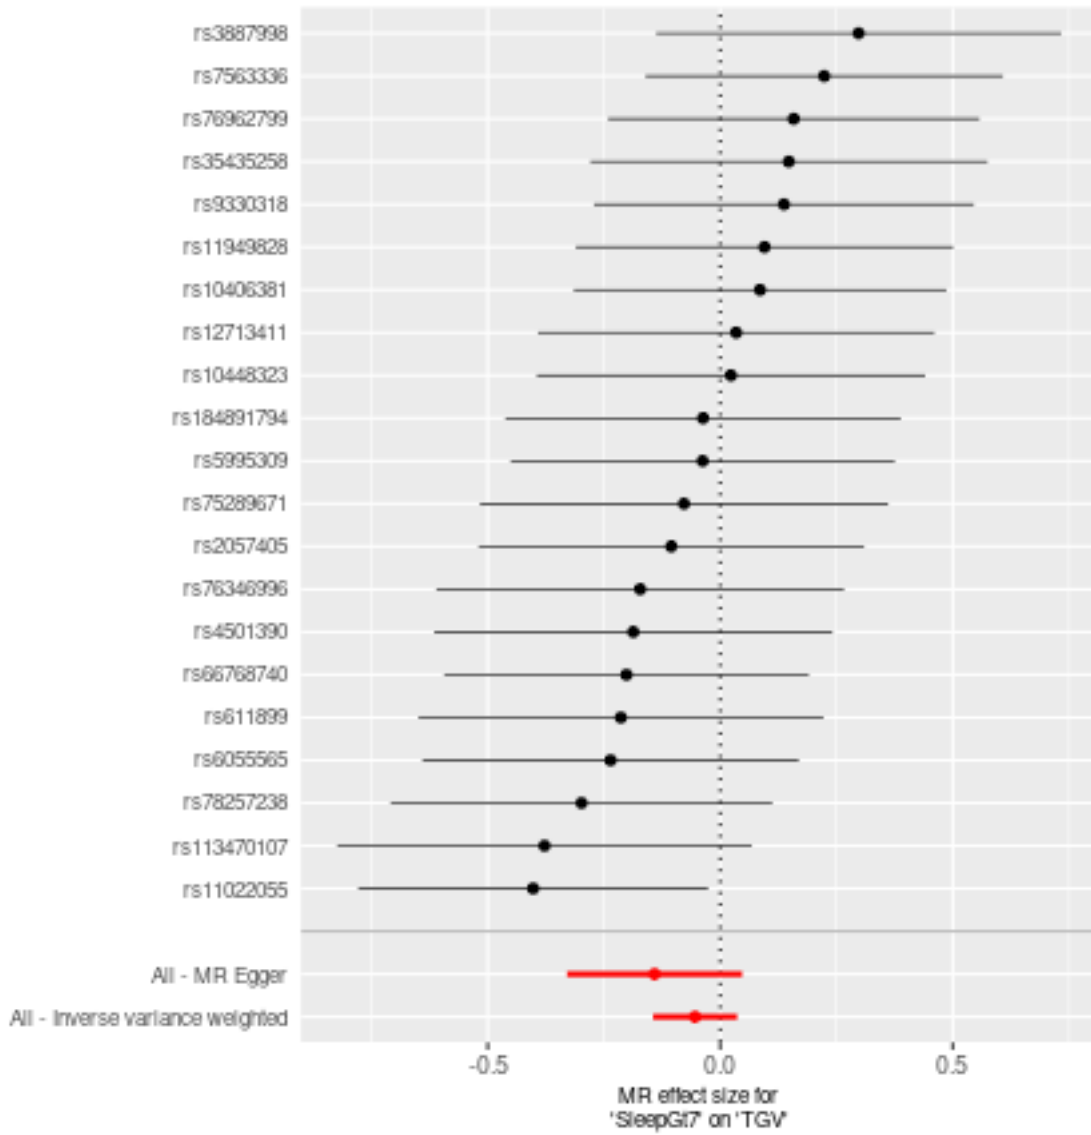

### Comparison of results using different MR methods

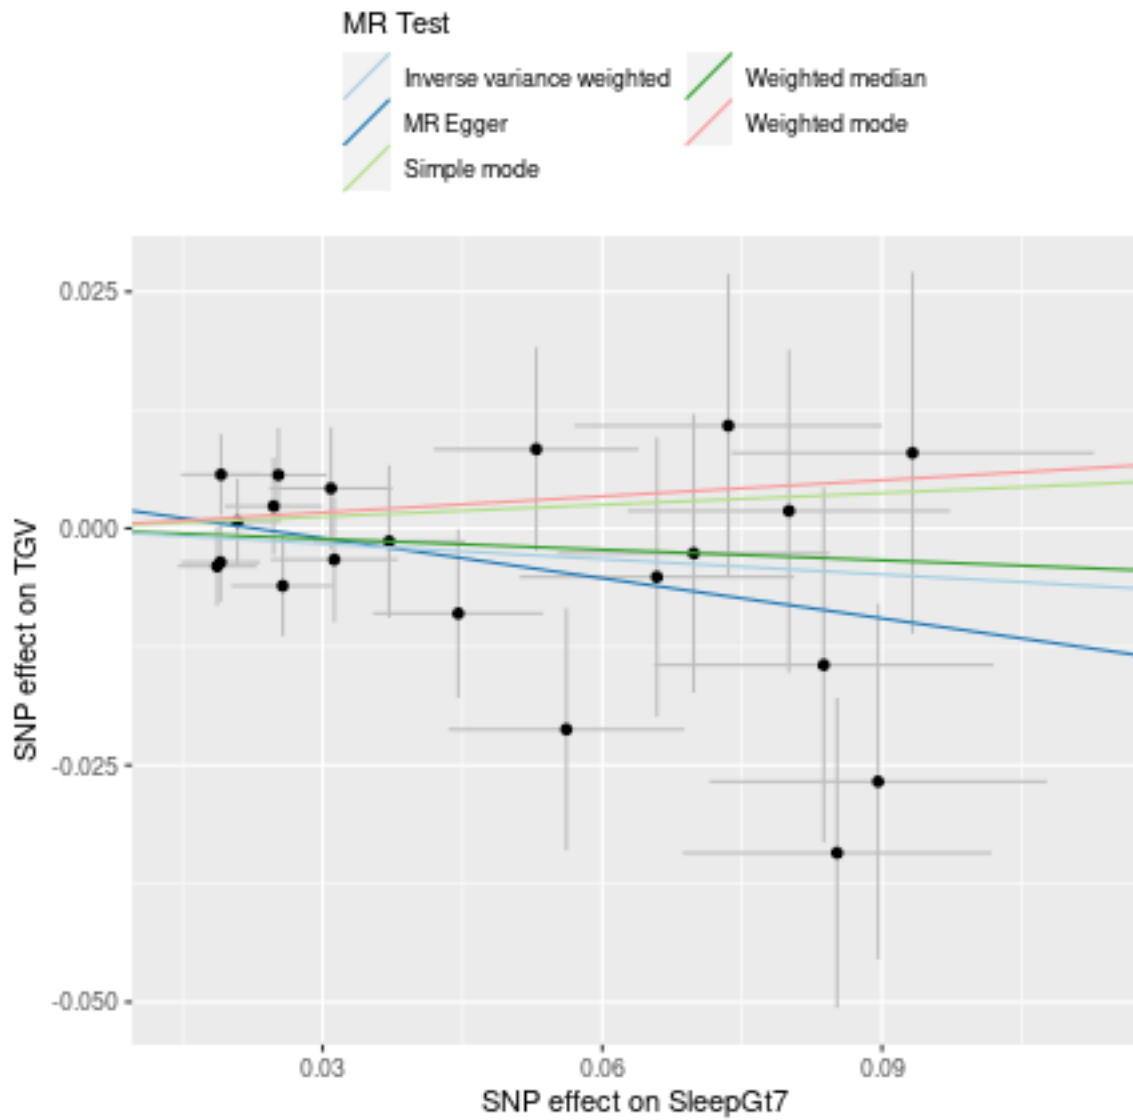

# Funnel plot

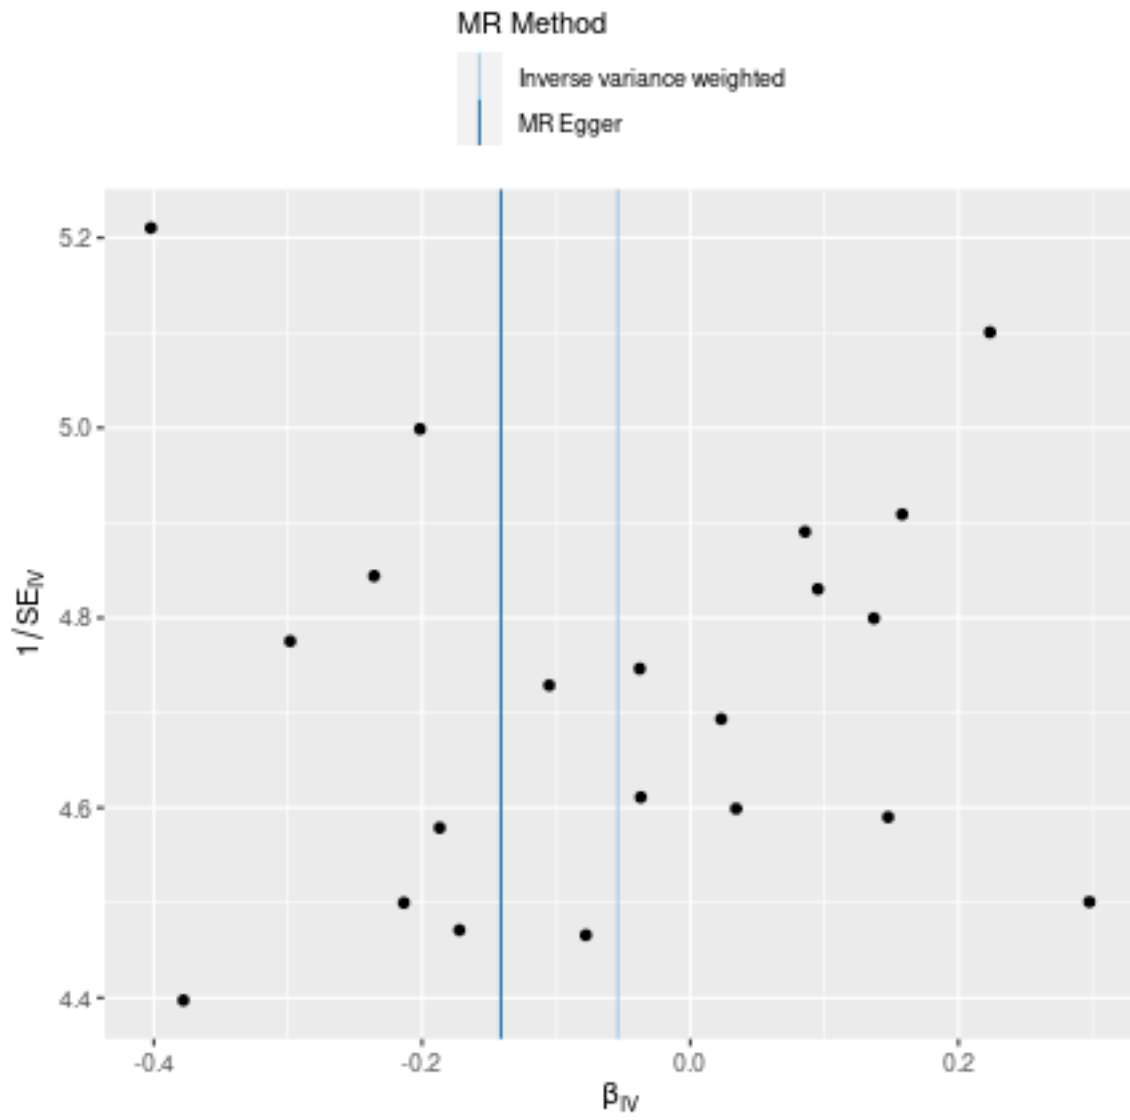

## Leave-one-out sensitivity analysis

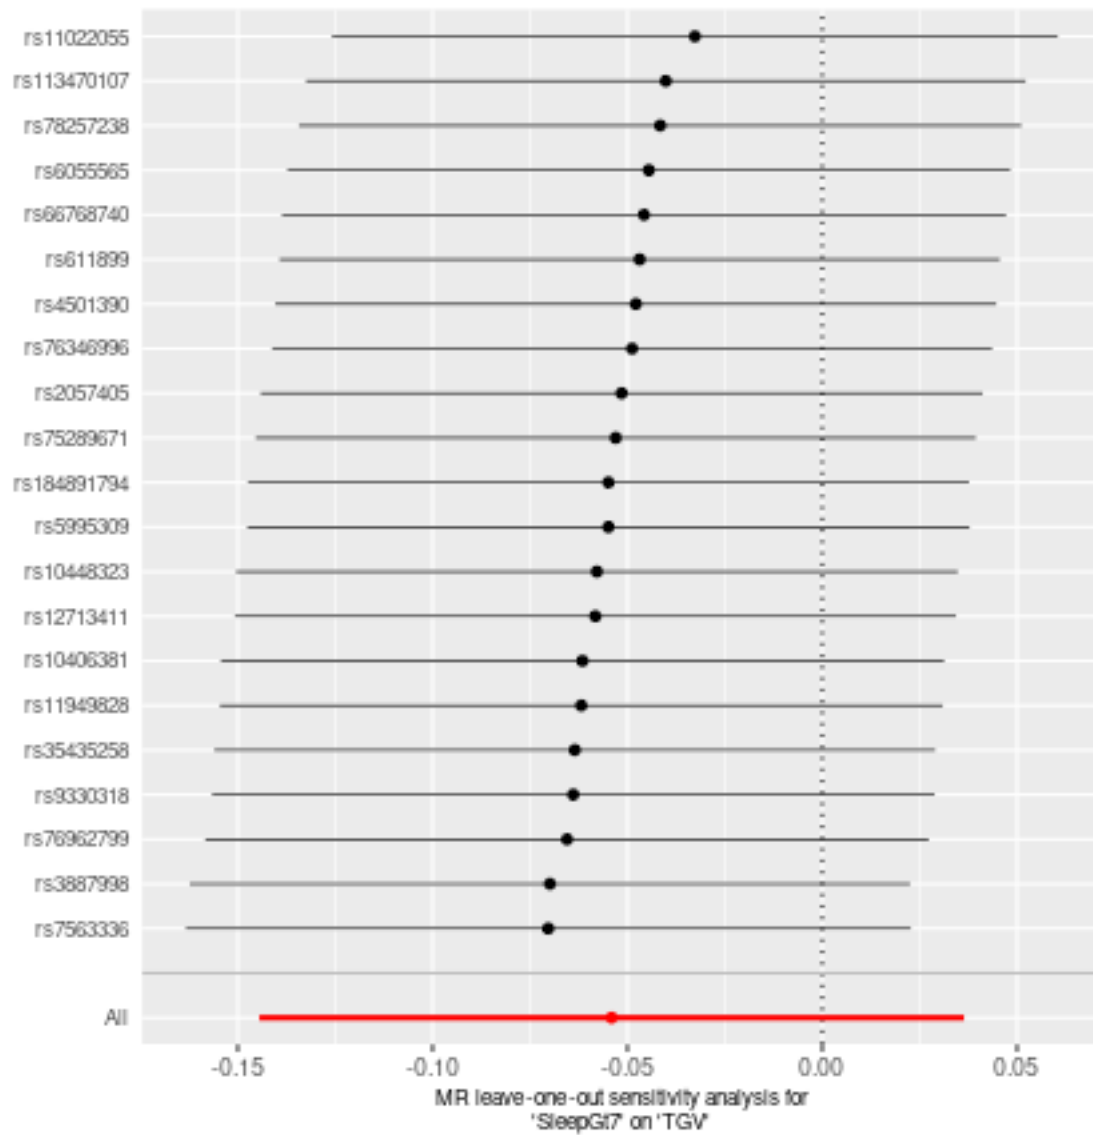

# Two sample MR report

---

SleepLe7 against HippV

**P<10-6**

Date: 24 september, 2021

---

## Results from two sample MR:

| method                    | nsnp | b          | se        | pval      |
|---------------------------|------|------------|-----------|-----------|
| MR Egger                  | 30   | -0.0678012 | 0.2229604 | 0.7633039 |
| Weighted median           | 30   | -0.0519938 | 0.1143050 | 0.6492035 |
| Inverse variance weighted | 30   | 0.0022258  | 0.0790990 | 0.9775514 |
| Simple mode               | 30   | -0.1871948 | 0.2508017 | 0.4614427 |
| Weighted mode             | 30   | -0.2103634 | 0.2740287 | 0.4488894 |

---

## Heterogeneity tests

| method                    | Q        | Q_df | Q_pval    |
|---------------------------|----------|------|-----------|
| MR Egger                  | 29.85086 | 28   | 0.3703822 |
| Inverse variance weighted | 29.97172 | 29   | 0.4154165 |

---

## Test for directional horizontal pleiotropy

| egger_intercept | se        | pval      |
|-----------------|-----------|-----------|
| 0.0015696       | 0.0046618 | 0.7388584 |

---

## Test that the exposure is upstream of the outcome

| snp_r2.exposure | snp_r2.outcome | correct_causal_direction | steiger_pval |
|-----------------|----------------|--------------------------|--------------|
| 0.0037888       | 0.0010377      | TRUE                     | 3.2e-06      |

---

Note - R<sup>2</sup> values are approximate

---

Forest plot of single SNP MR

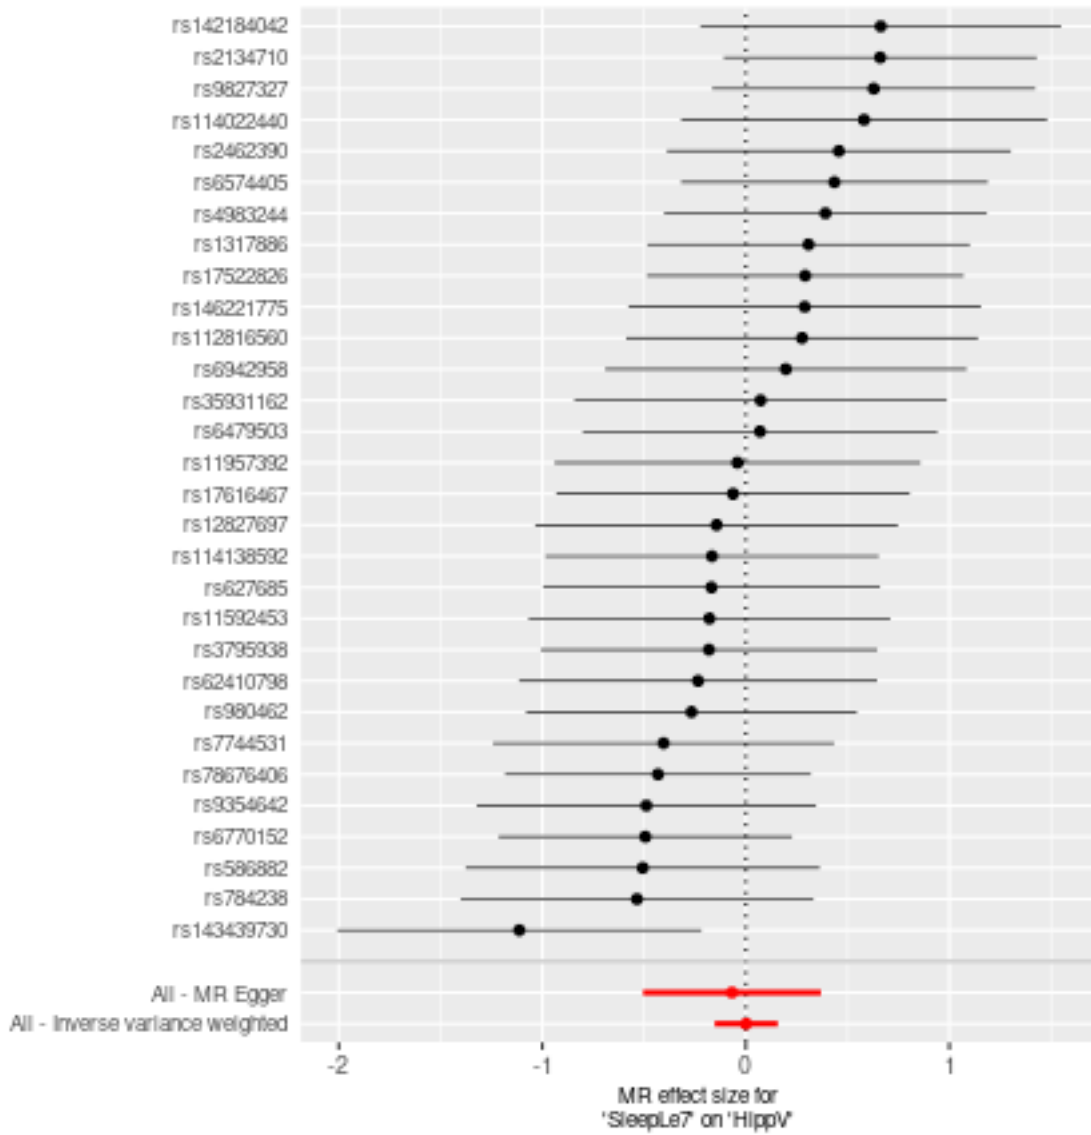

### Comparison of results using different MR methods

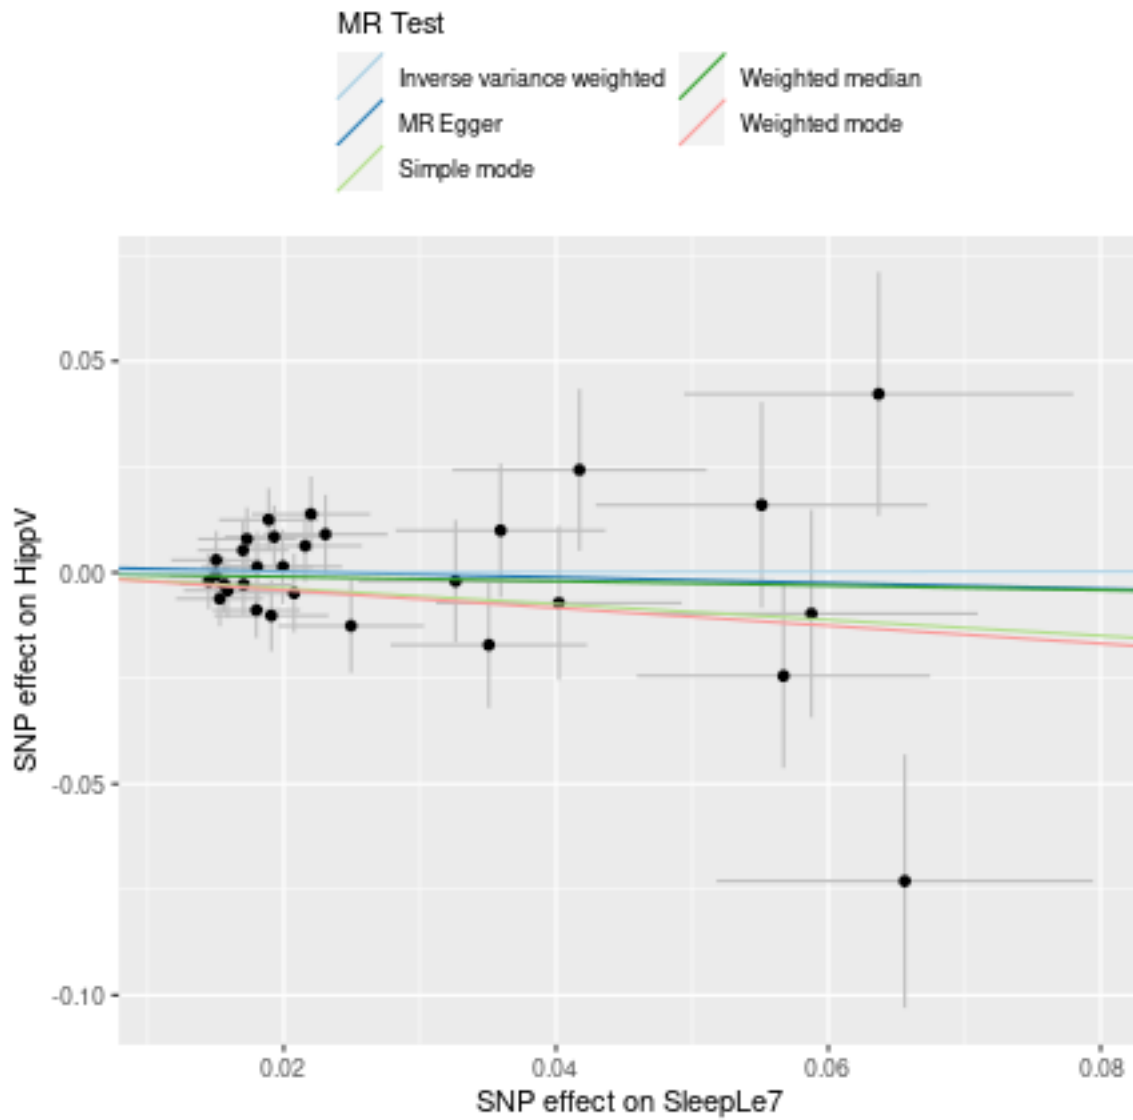



# Funnel plot

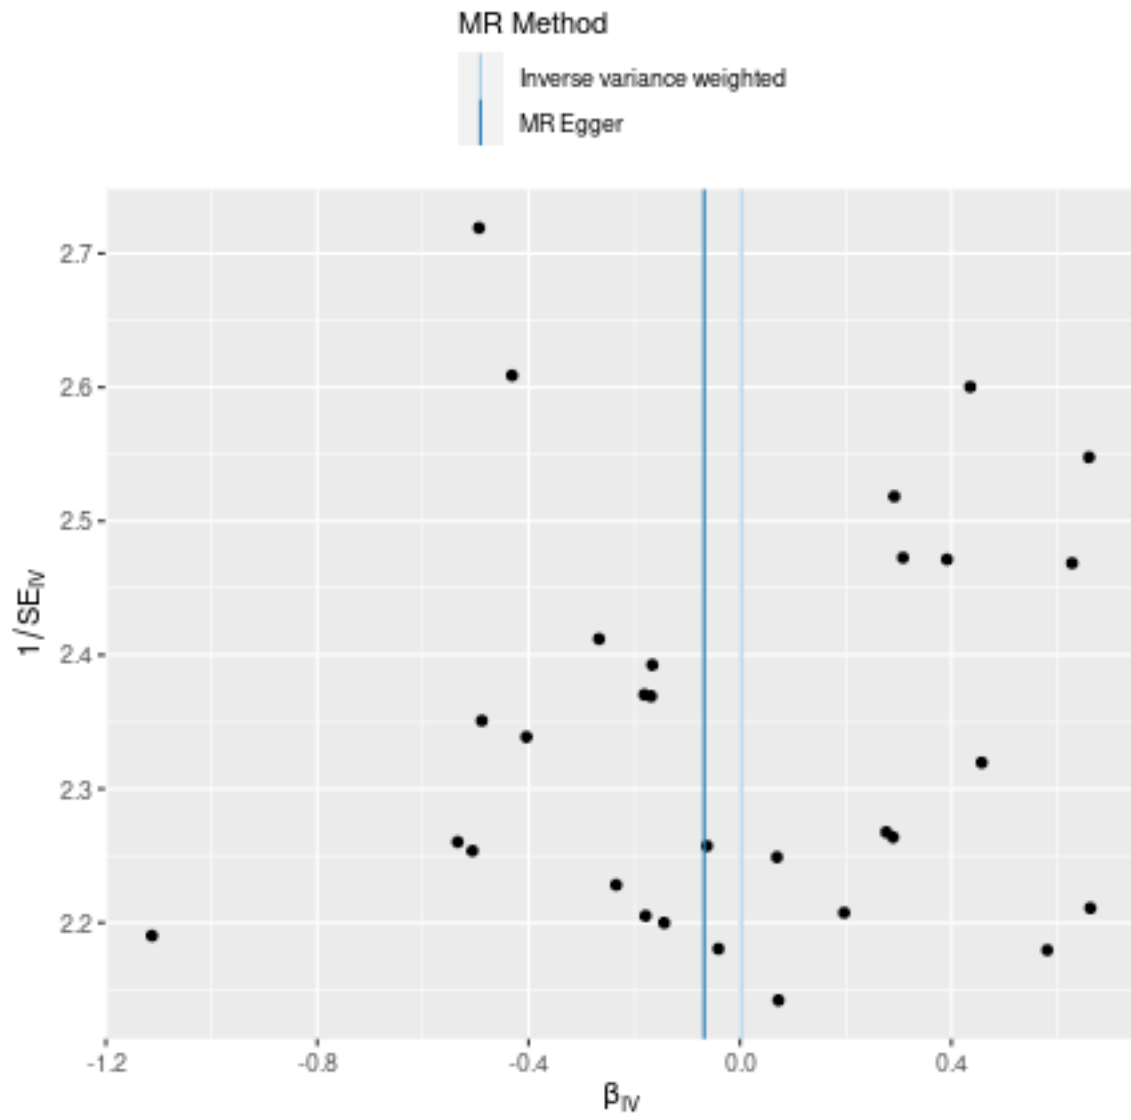

## Leave-one-out sensitivity analysis

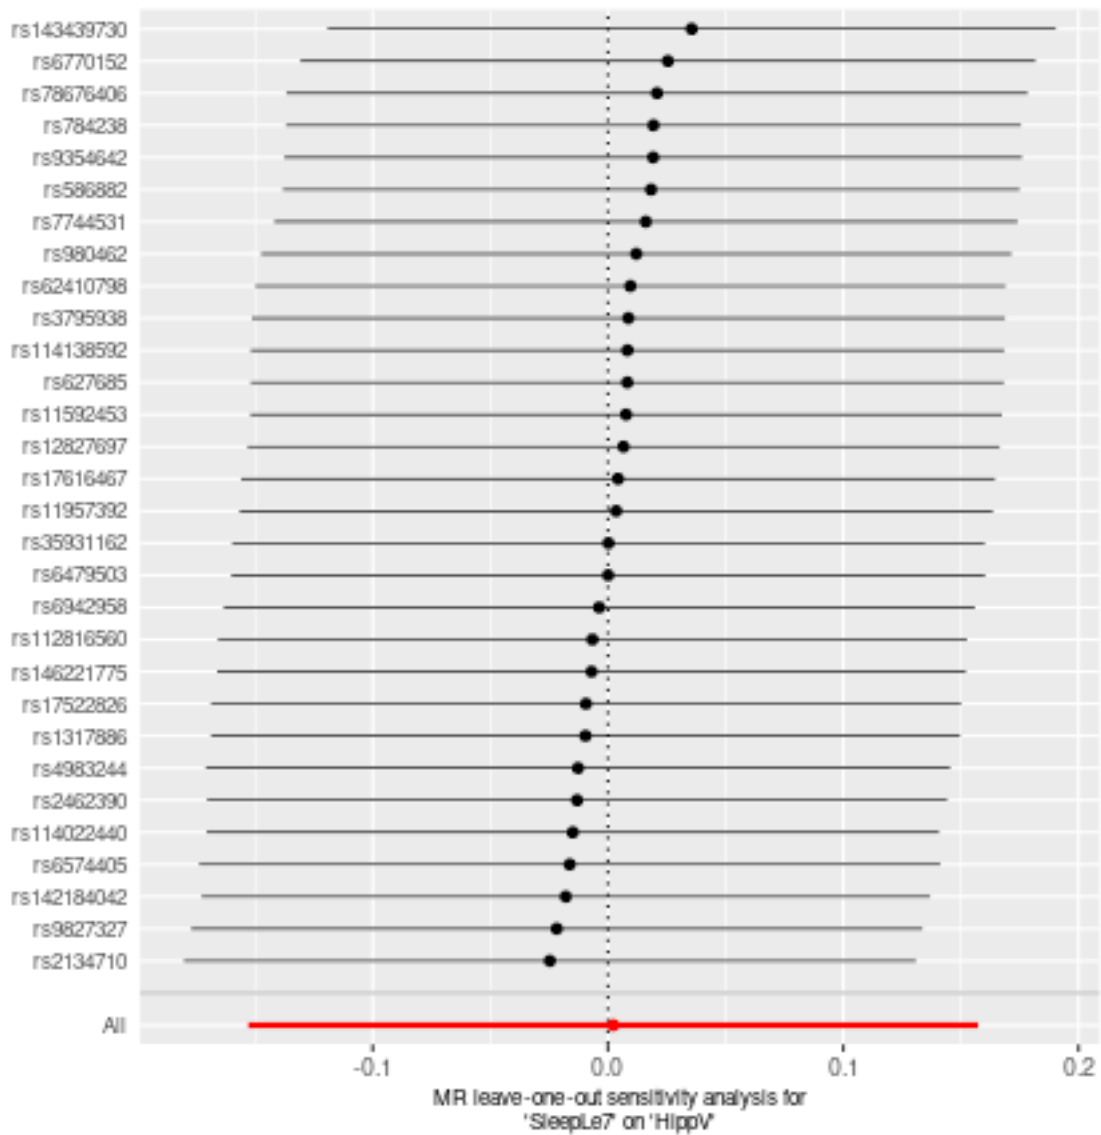

# Two sample MR report

---

SleepLe7 against ICV

**P<10-6**

Date: 24 september, 2021

---

## Results from two sample MR:

| method                    | nsnp | b          | se        | pval      |
|---------------------------|------|------------|-----------|-----------|
| MR Egger                  | 30   | 0.0849180  | 0.2261827 | 0.7101625 |
| Weighted median           | 30   | -0.0461790 | 0.1143781 | 0.6864042 |
| Inverse variance weighted | 30   | 0.0318054  | 0.0813939 | 0.6959755 |
| Simple mode               | 30   | -0.0890807 | 0.2332230 | 0.7052794 |
| Weighted mode             | 30   | -0.0890807 | 0.2263548 | 0.6967960 |

---

## Heterogeneity tests

| method                    | Q        | Q_df | Q_pval    |
|---------------------------|----------|------|-----------|
| MR Egger                  | 28.07049 | 28   | 0.4607169 |
| Inverse variance weighted | 28.13401 | 29   | 0.5107562 |

---

## Test for directional horizontal pleiotropy

| egger_intercept | se        | pval      |
|-----------------|-----------|-----------|
| -0.0011905      | 0.0047292 | 0.8030881 |

---

## Test that the exposure is upstream of the outcome

| snp_r2.exposure | snp_r2.outcome | correct_causal_direction | steiger_pval |
|-----------------|----------------|--------------------------|--------------|
| 0.0037888       | 0.0010717      | TRUE                     | 4.8e-06      |

---

Note - R<sup>2</sup> values are approximate

---

Forest plot of single SNP MR

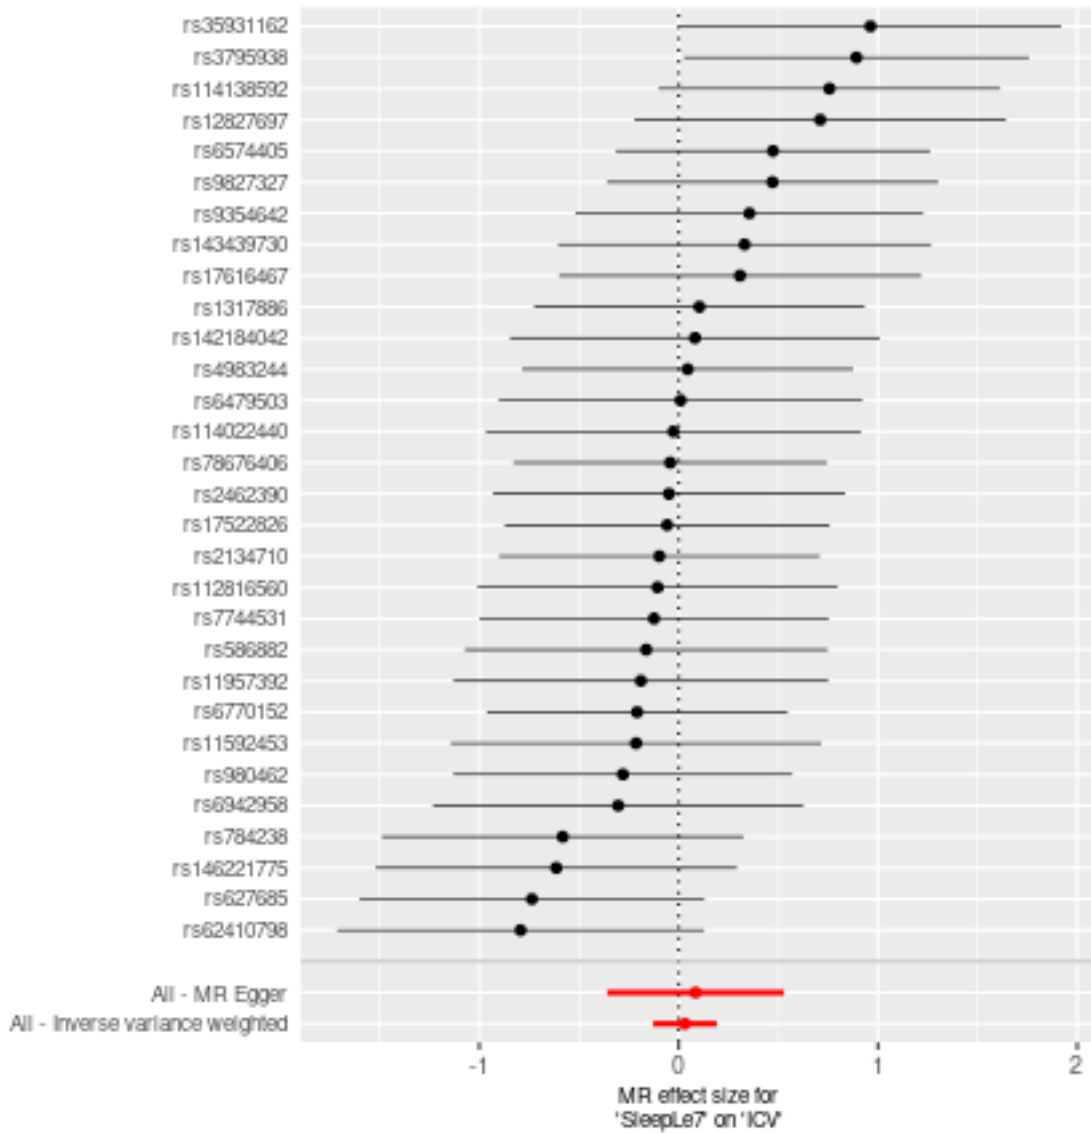

## Comparison of results using different MR methods

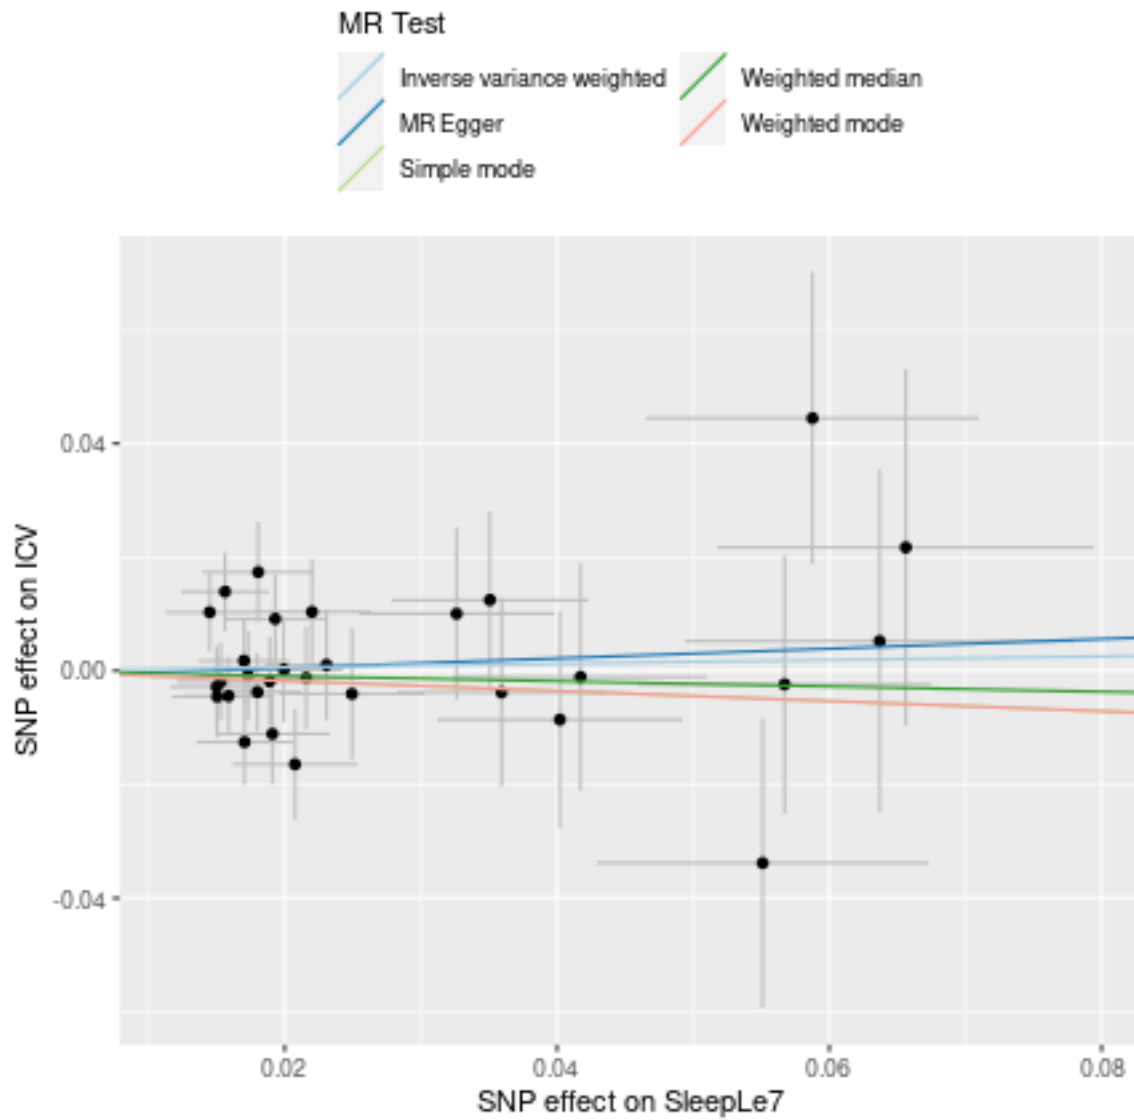

# Funnel plot

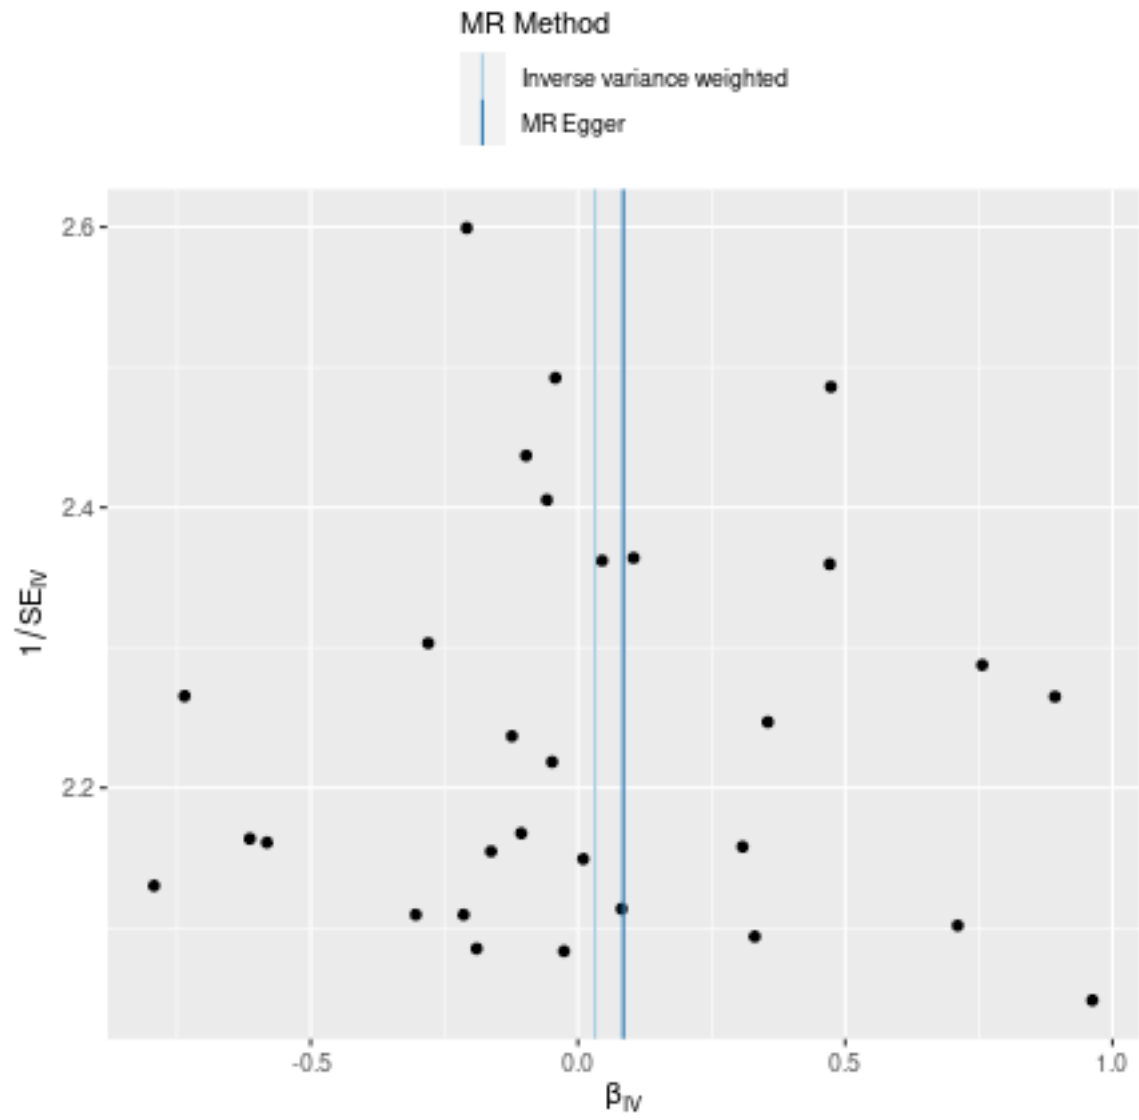

## Leave-one-out sensitivity analysis

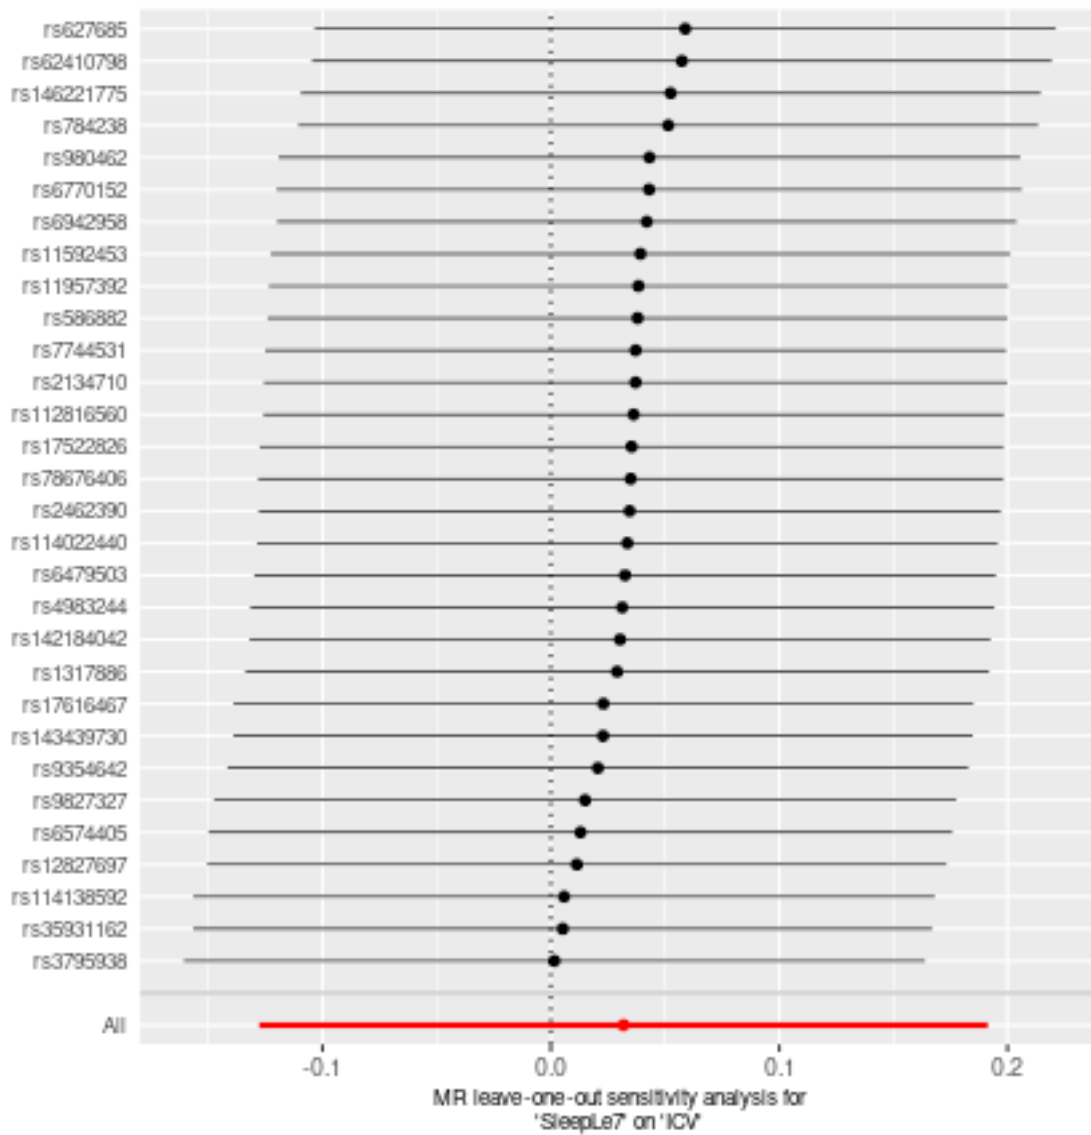

# Two sample MR report

---

## SleepLe7 against TGV

Date: 24 september, 2021

---

### Results from two sample MR:

| method                    | nsnp | b          | se        | pval      |
|---------------------------|------|------------|-----------|-----------|
| MR Egger                  | 30   | -0.0961532 | 0.1379010 | 0.4913878 |
| Weighted median           | 30   | -0.0319099 | 0.0698793 | 0.6479281 |
| Inverse variance weighted | 30   | -0.0103353 | 0.0494239 | 0.8343585 |
| Simple mode               | 30   | -0.0908140 | 0.1403078 | 0.5225623 |
| Weighted mode             | 30   | -0.0835624 | 0.1423746 | 0.5617996 |

---

### Heterogeneity tests

| method                    | Q        | Q_df | Q_pval    |
|---------------------------|----------|------|-----------|
| MR Egger                  | 28.29881 | 28   | 0.4487004 |
| Inverse variance weighted | 28.74861 | 29   | 0.4782141 |

---

### Test for directional horizontal pleiotropy

| egger_intercept | se        | pval      |
|-----------------|-----------|-----------|
| 0.0019235       | 0.0028832 | 0.5101537 |

---

### Test that the exposure is upstream of the outcome

| snp_r2.exposure | snp_r2.outcome | correct_causal_direction | steiger_pval |
|-----------------|----------------|--------------------------|--------------|
| 0.0037888       | 0.0010039      | TRUE                     | 2.1e-06      |

---

Note - R<sup>2</sup> values are approximate

---



Forest plot of single SNP MR

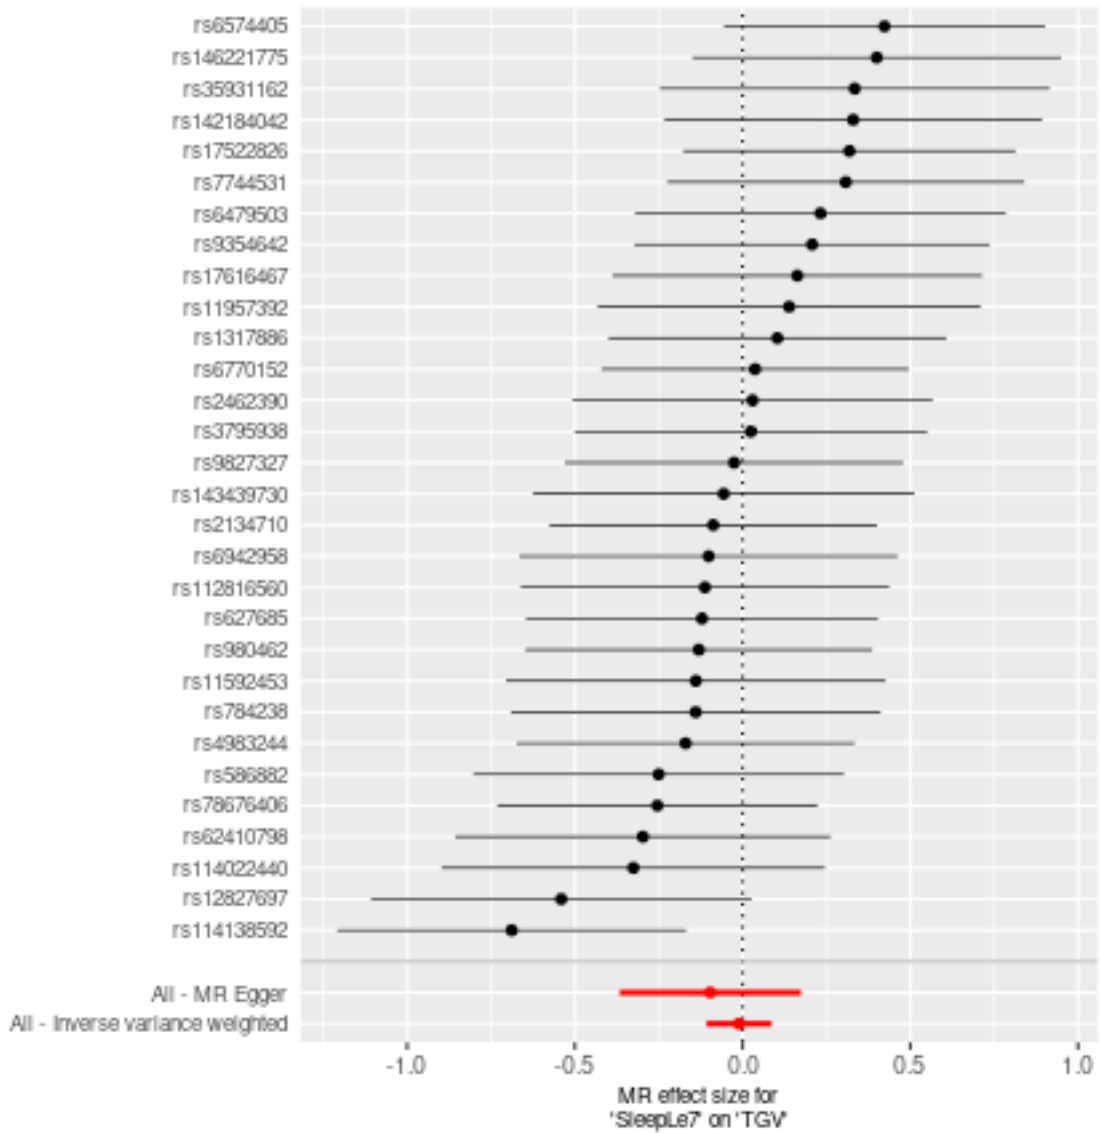

### Comparison of results using different MR methods

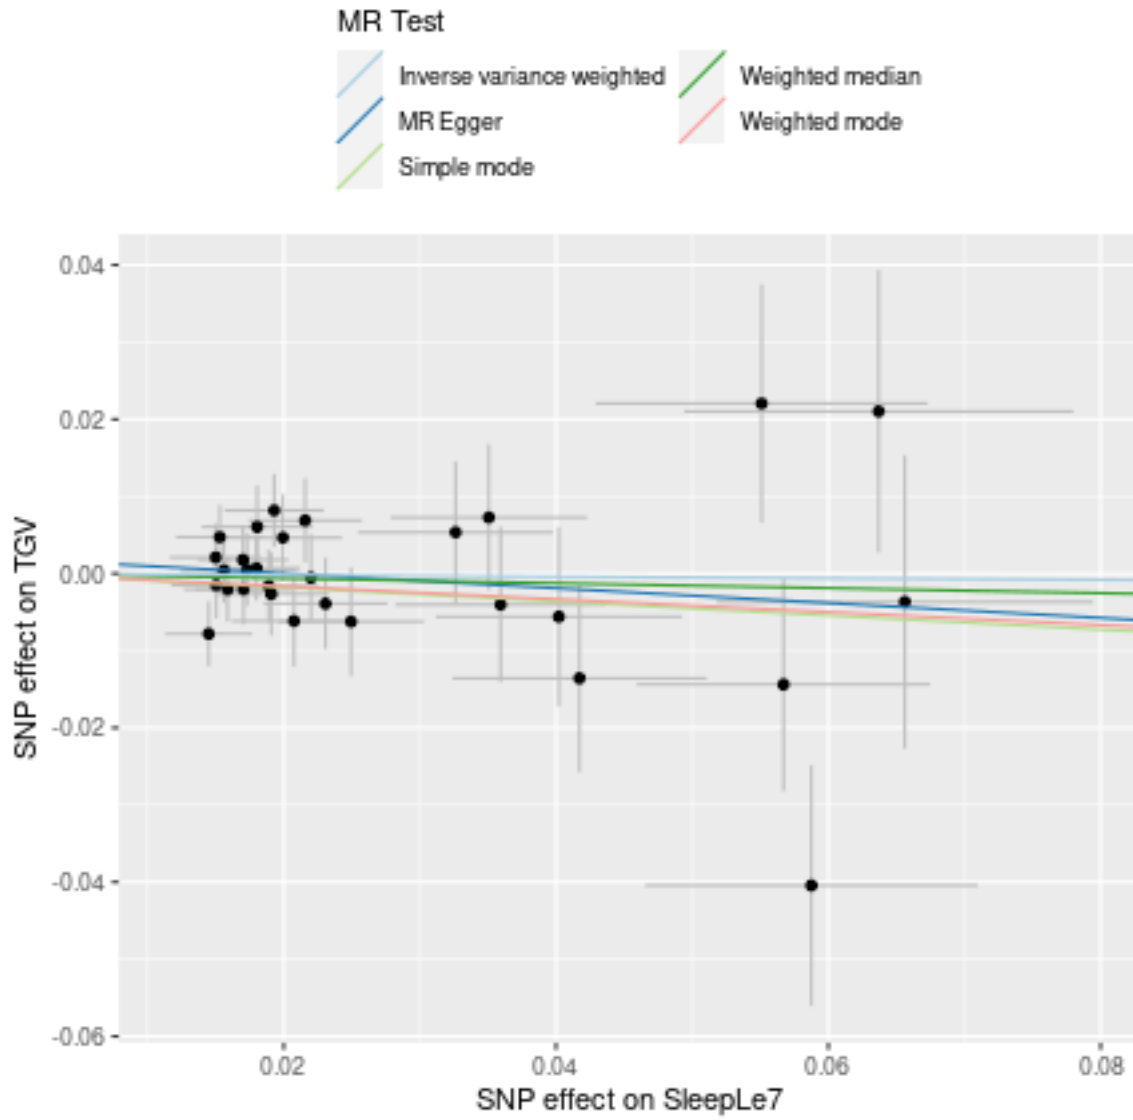

# Funnel plot

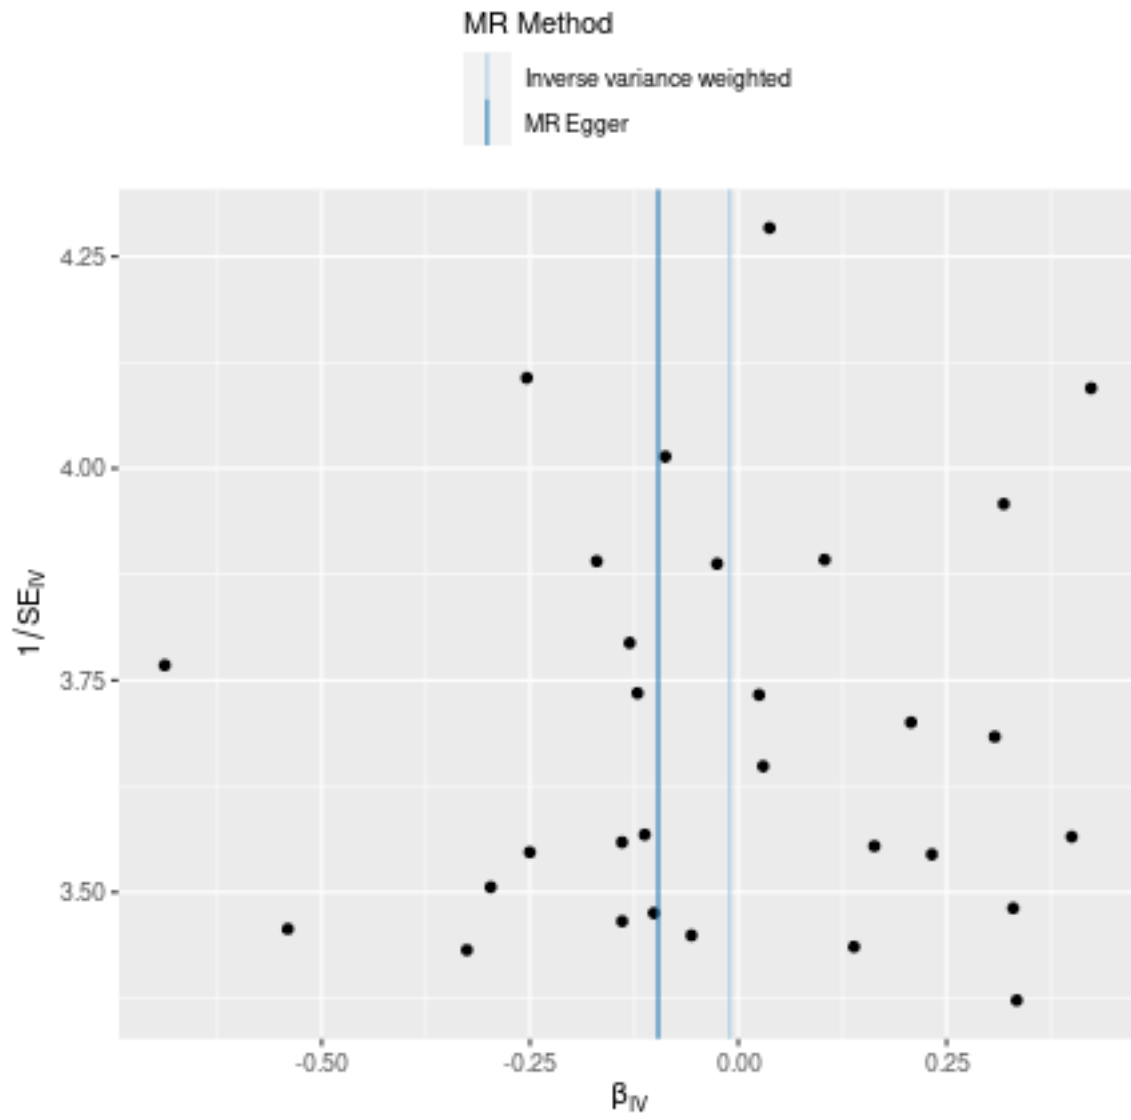

## Leave-one-out sensitivity analysis

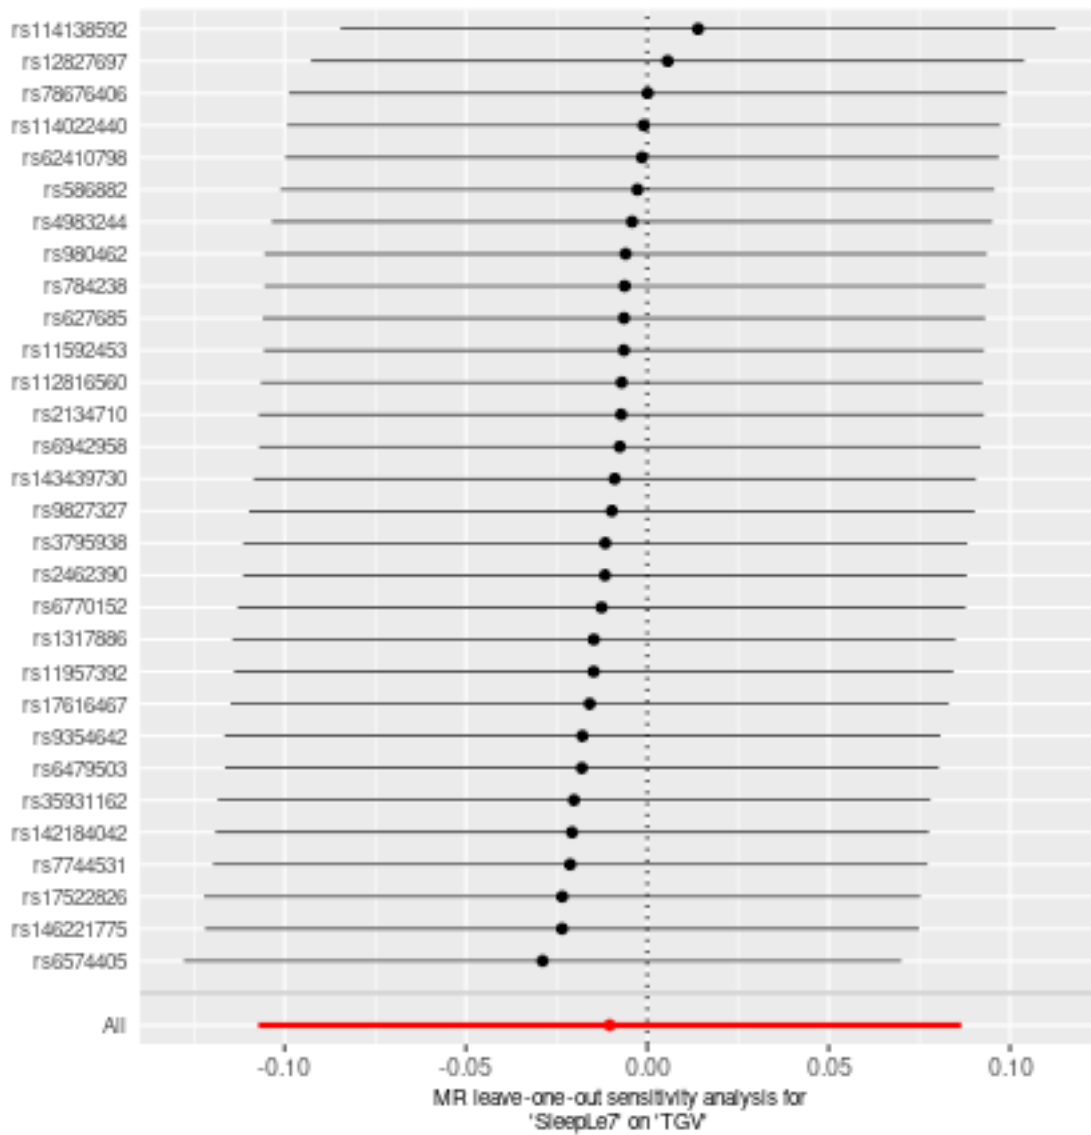

## Two sample MR report

---

TGV against SleepGt7

**P<10-6**

Date: 24 september, 2021

---

Results from two sample MR:

| method                    | nsnp | b          | se        | pval      |
|---------------------------|------|------------|-----------|-----------|
| MR Egger                  | 67   | 0.1054601  | 0.0837270 | 0.2123280 |
| Weighted median           | 67   | -0.0008322 | 0.0383481 | 0.9826867 |
| Inverse variance weighted | 67   | -0.0001759 | 0.0331697 | 0.9957690 |
| Simple mode               | 67   | 0.0111666  | 0.0984704 | 0.9100569 |
| Weighted mode             | 67   | 0.0147731  | 0.0977878 | 0.8803788 |

---

Heterogeneity tests

| method                    | Q        | Q_df | Q_pval    |
|---------------------------|----------|------|-----------|
| MR Egger                  | 109.1096 | 65   | 0.0005061 |
| Inverse variance weighted | 112.2713 | 66   | 0.0003332 |

---

Test for directional horizontal pleiotropy

| egger_intercept | se        | pval      |
|-----------------|-----------|-----------|
| -0.0032295      | 0.0023531 | 0.1746514 |

---

Test that the exposure is upstream of the outcome

| snp_r2.exposure | snp_r2.outcome | correct_causal_direction | steiger_pval |
|-----------------|----------------|--------------------------|--------------|
| 0.0620032       | 0.0011137      | TRUE                     | 0            |

---

Note - R<sup>2</sup> values are approximate

---

Forest plot of single SNP MR

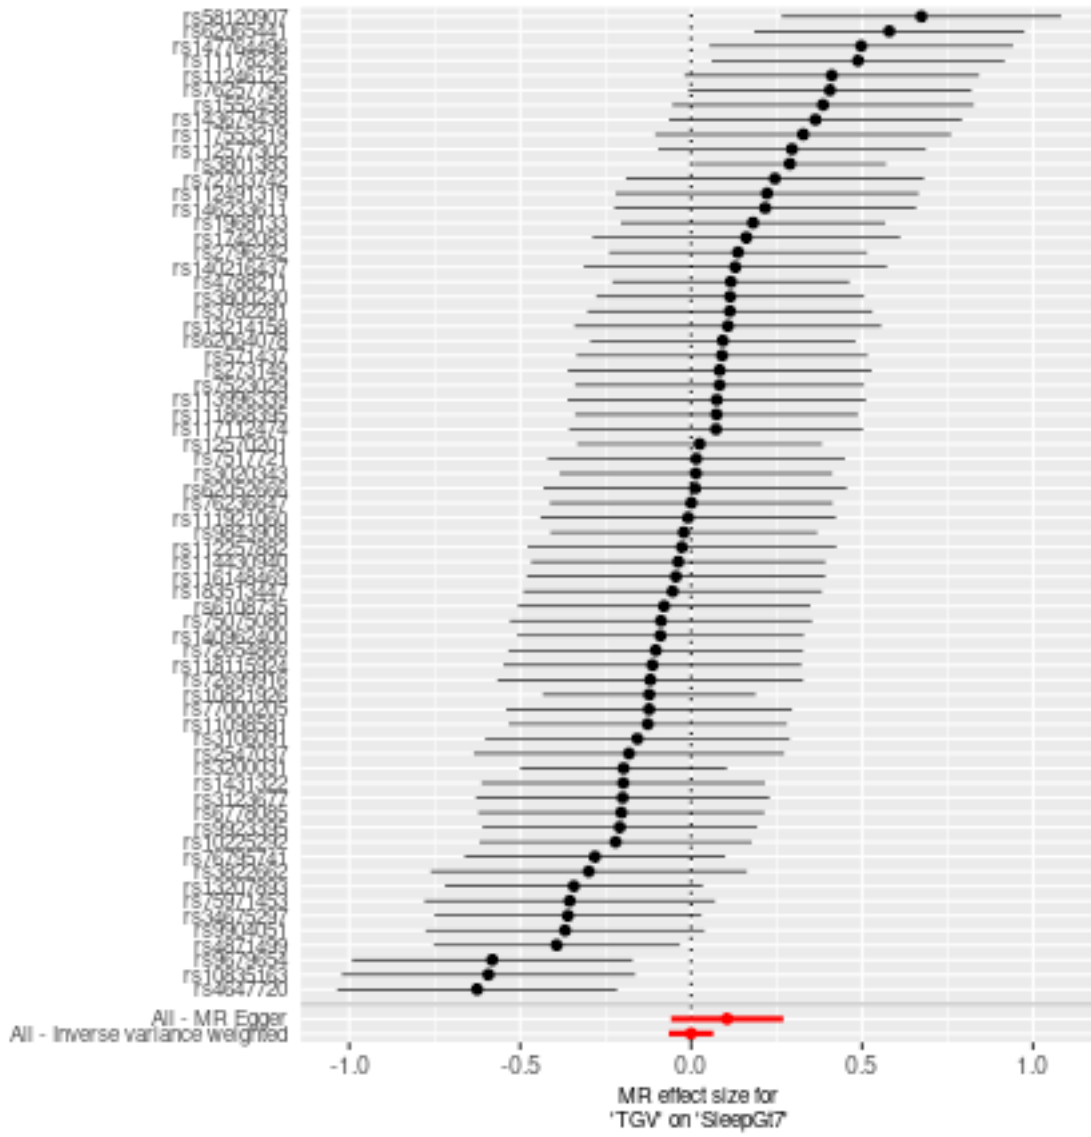

Comparison of results using different MR methods

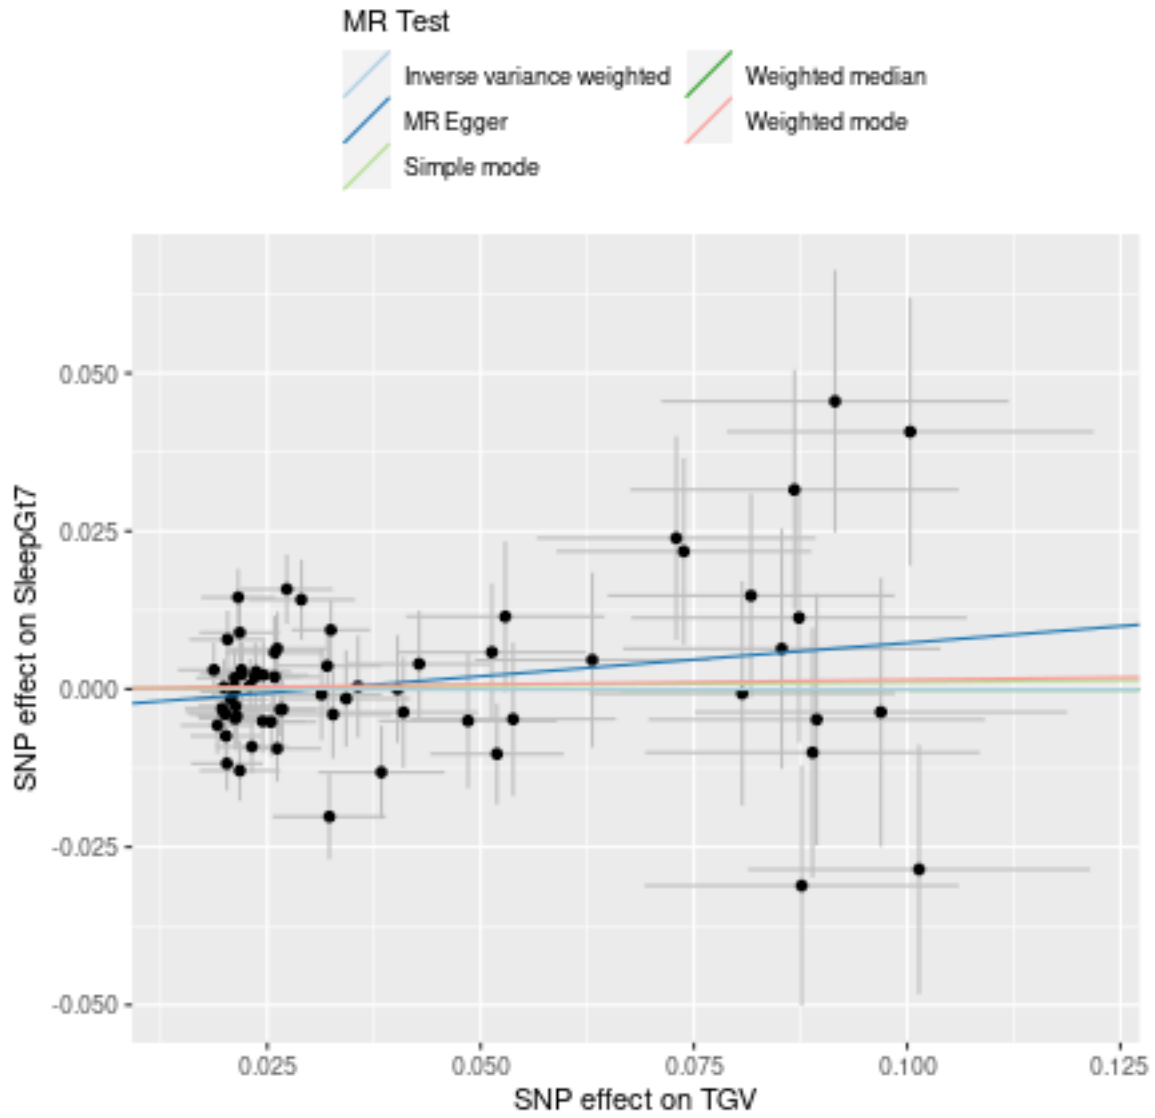

# Funnel plot

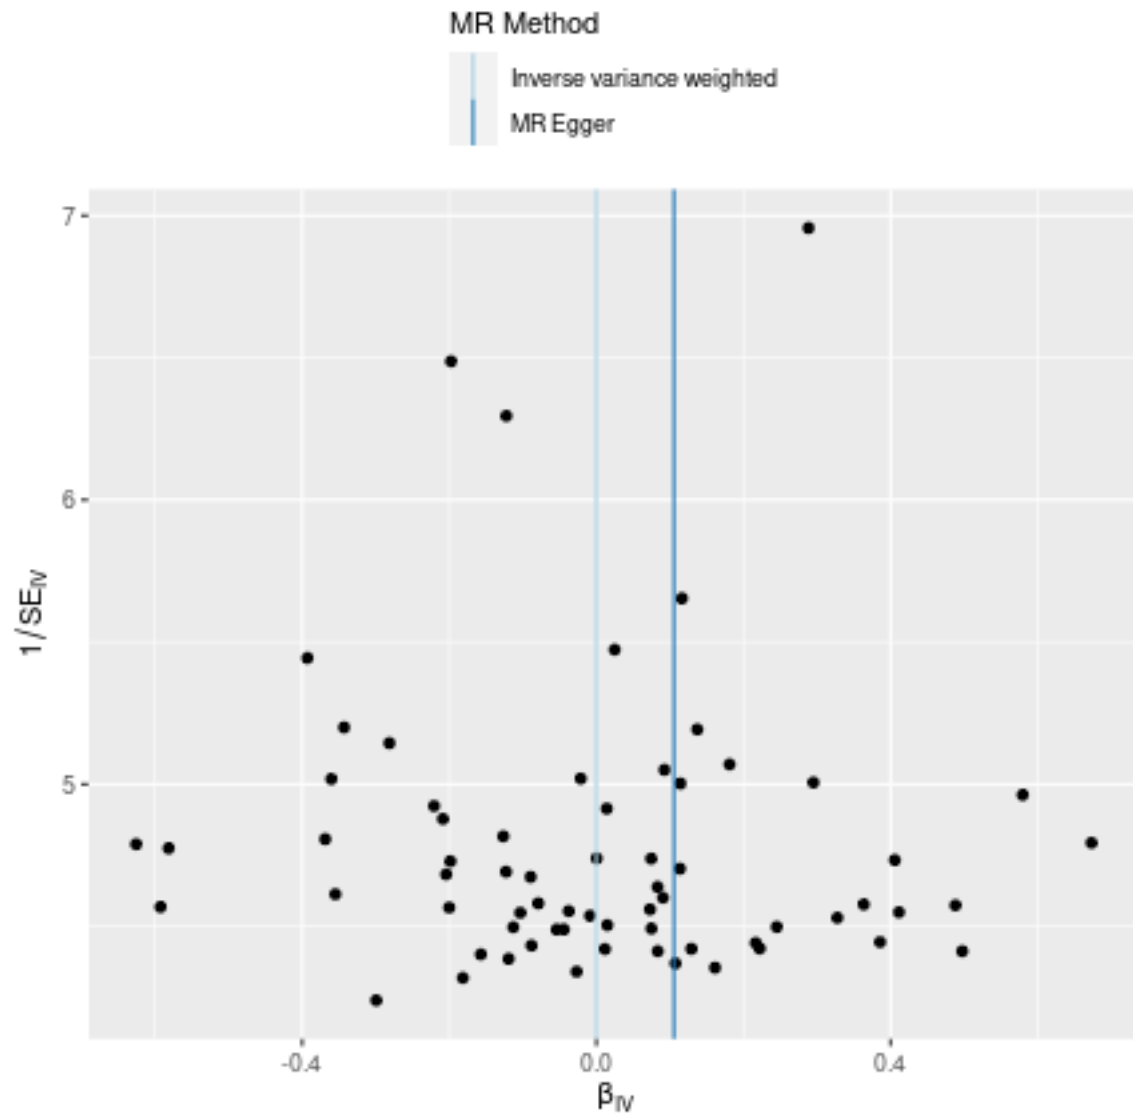



# Leave-one-out sensitivity analysis

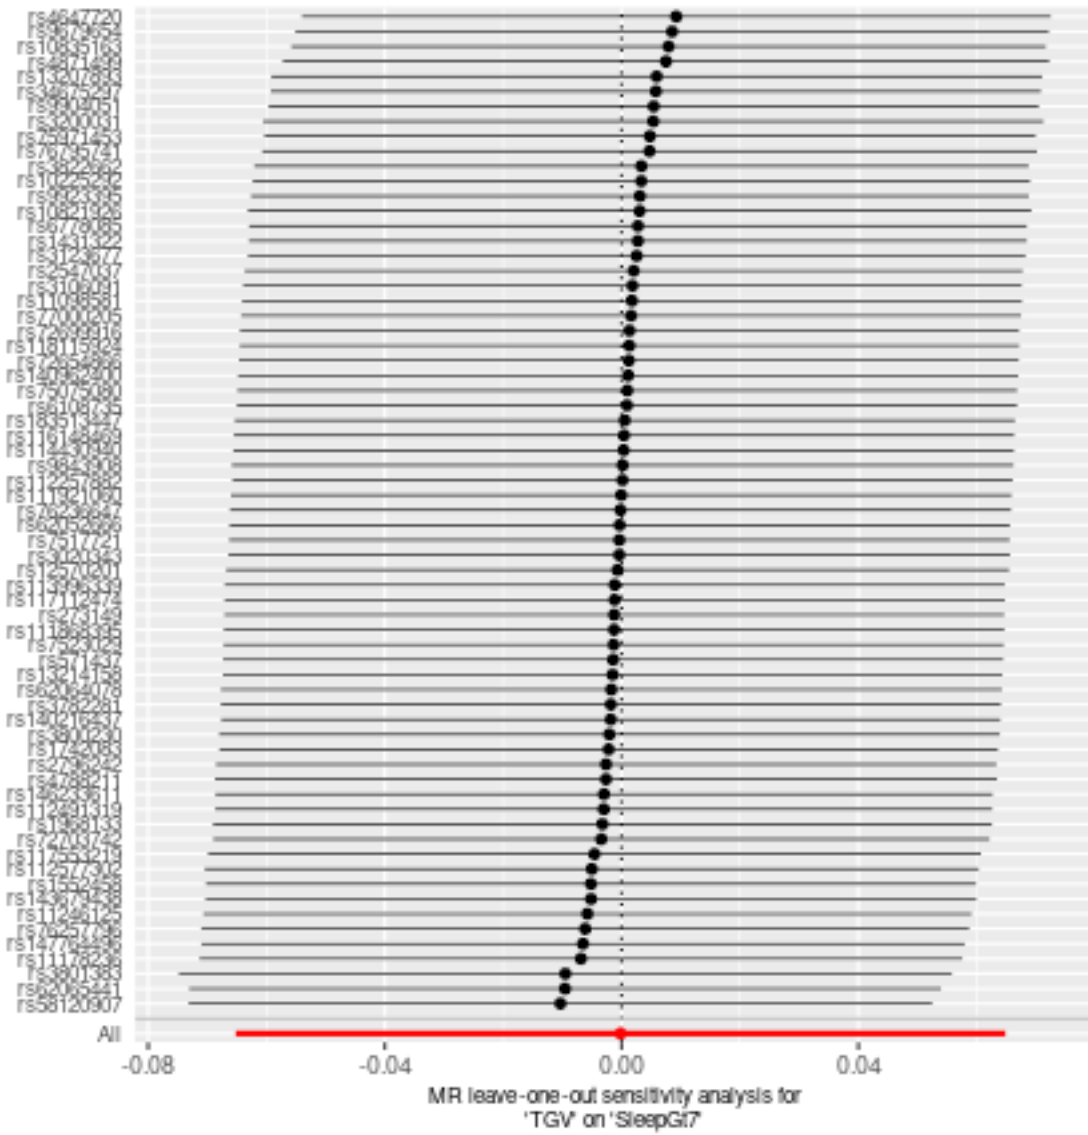

## Two sample MR report

---

TGV against SleepLe7

**P<10-6**

Date: 24 september, 2021

---

Results from two sample MR:

| method                    | nsnp | b          | se        | pval      |
|---------------------------|------|------------|-----------|-----------|
| MR Egger                  | 67   | -0.0178969 | 0.0540929 | 0.7418183 |
| Weighted median           | 67   | 0.0223517  | 0.0285948 | 0.4344087 |
| Inverse variance weighted | 67   | 0.0361167  | 0.0213874 | 0.0912793 |
| Simple mode               | 67   | -0.0029460 | 0.0643265 | 0.9636094 |
| Weighted mode             | 67   | 0.0199181  | 0.0593531 | 0.7382476 |

---

Heterogeneity tests

| method                    | Q        | Q_df | Q_pval    |
|---------------------------|----------|------|-----------|
| MR Egger                  | 80.03294 | 65   | 0.0991988 |
| Inverse variance weighted | 81.48735 | 66   | 0.0947592 |

---

Test for directional horizontal pleiotropy

| egger_intercept | se        | pval      |
|-----------------|-----------|-----------|
| 0.0016544       | 0.0015222 | 0.2811208 |

---

Test that the exposure is upstream of the outcome

| snp_r2.exposure | snp_r2.outcome | correct_causal_direction | steiger_pval |
|-----------------|----------------|--------------------------|--------------|
| 0.0620032       | 0.0004911      | TRUE                     | 0            |

---

Note - R<sup>2</sup> values are approximate

---

Forest plot of single SNP MR

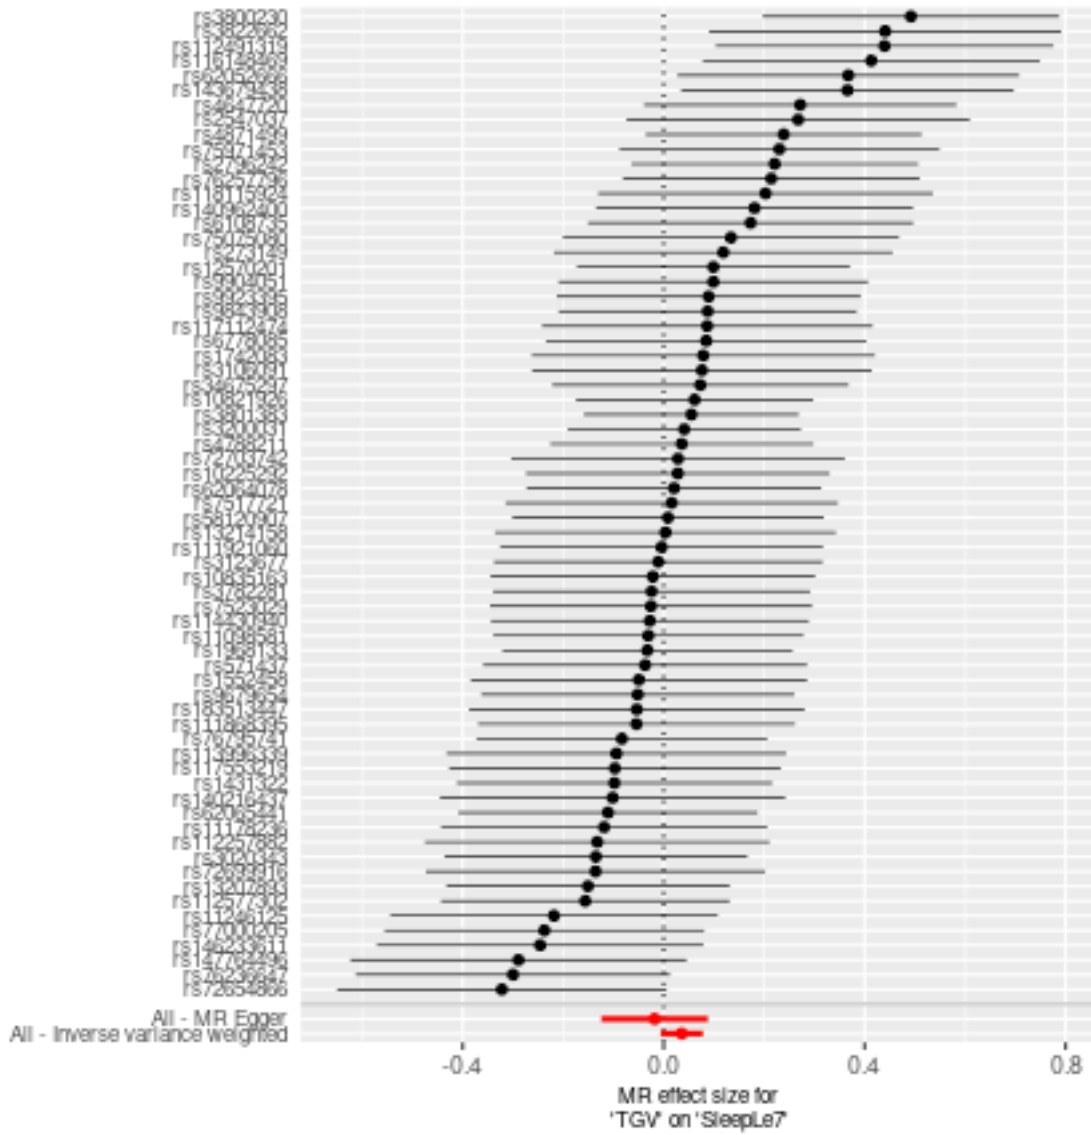

### Comparison of results using different MR methods

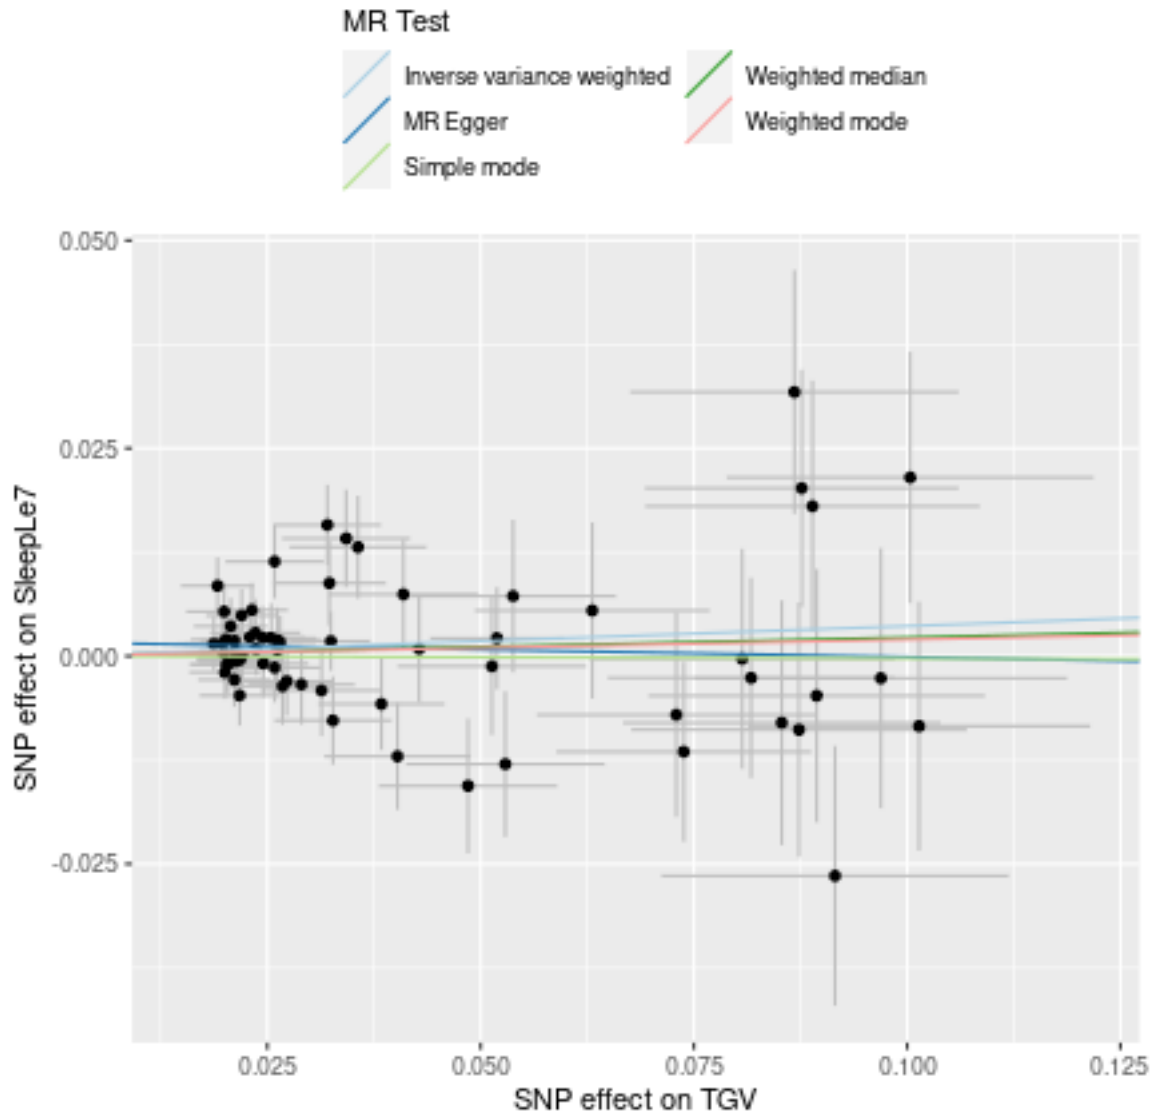

# Funnel plot

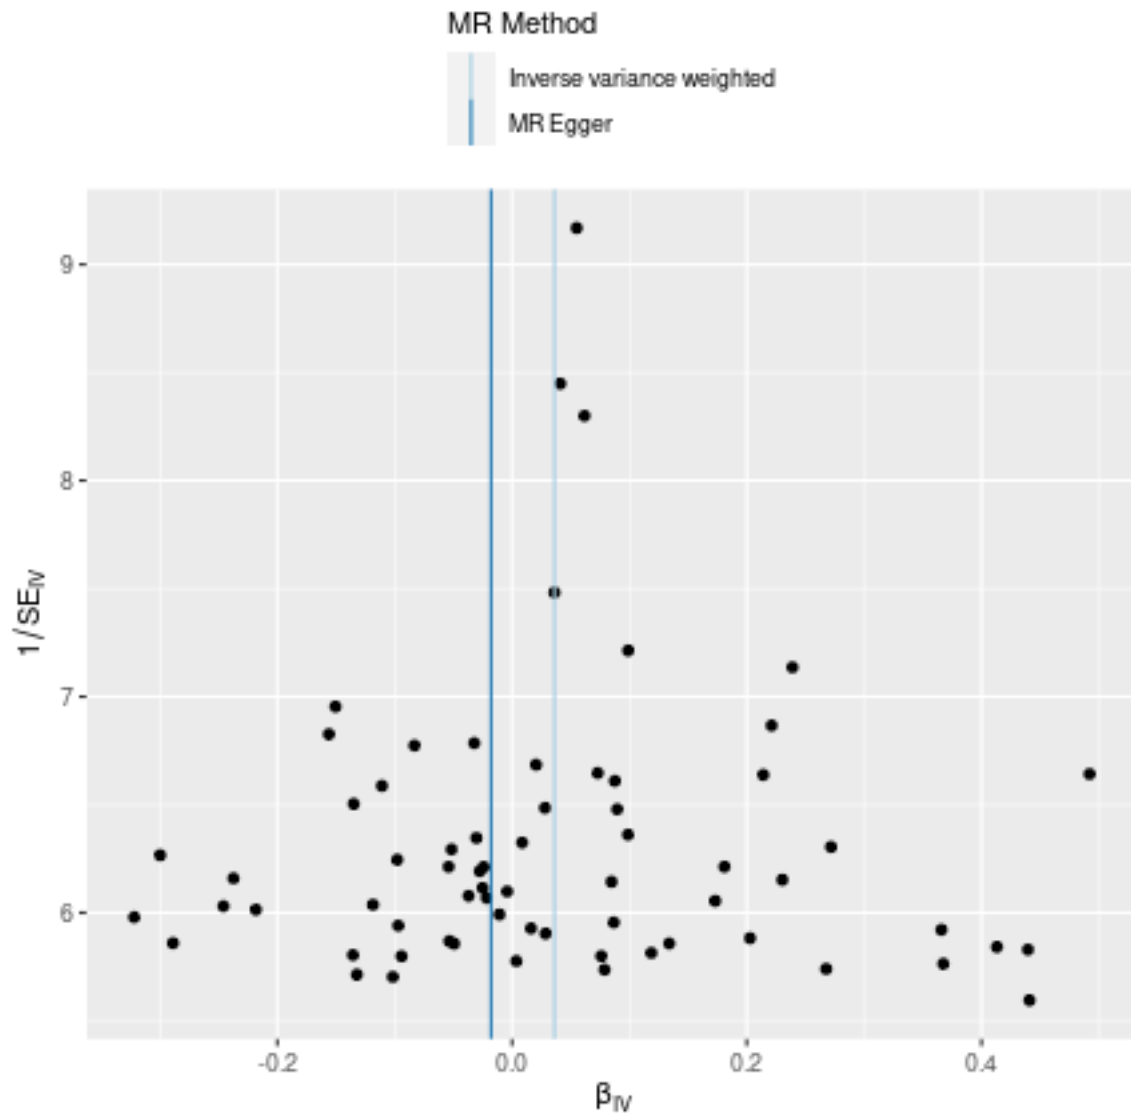



# Two sample MR report

---

## ICV against SleepLe7

Date: 17 juni, 2022

---

### Results from two sample MR:

| method                    | nsnp | b          | se        | pval      |
|---------------------------|------|------------|-----------|-----------|
| MR Egger                  | 12   | -0.0305489 | 0.0907573 | 0.7433758 |
| Weighted median           | 12   | 0.0202472  | 0.0280124 | 0.4698069 |
| Inverse variance weighted | 12   | 0.0468568  | 0.0255613 | 0.0667851 |
| Simple mode               | 12   | 0.0289360  | 0.0414359 | 0.4994675 |
| Weighted mode             | 12   | 0.0259266  | 0.0336285 | 0.4569656 |

---

### Heterogeneity tests

| method                    | Q        | Q_df | Q_pval    |
|---------------------------|----------|------|-----------|
| MR Egger                  | 17.33912 | 10   | 0.0671889 |
| Inverse variance weighted | 18.71135 | 11   | 0.0664759 |

---

### Test for directional horizontal pleiotropy

| egger_intercept | se        | pval      |
|-----------------|-----------|-----------|
| 0.0041922       | 0.0047125 | 0.3945729 |

---

### Test that the exposure is upstream of the outcome

| snp_r2.exposure | snp_r2.outcome | correct_causal_direction | steiger_pval |
|-----------------|----------------|--------------------------|--------------|
| 0.0222255       | 0.0001328      | TRUE                     | 0            |

---

Note - R<sup>2</sup> values are approximate

---

### Forest plot of single SNP MR

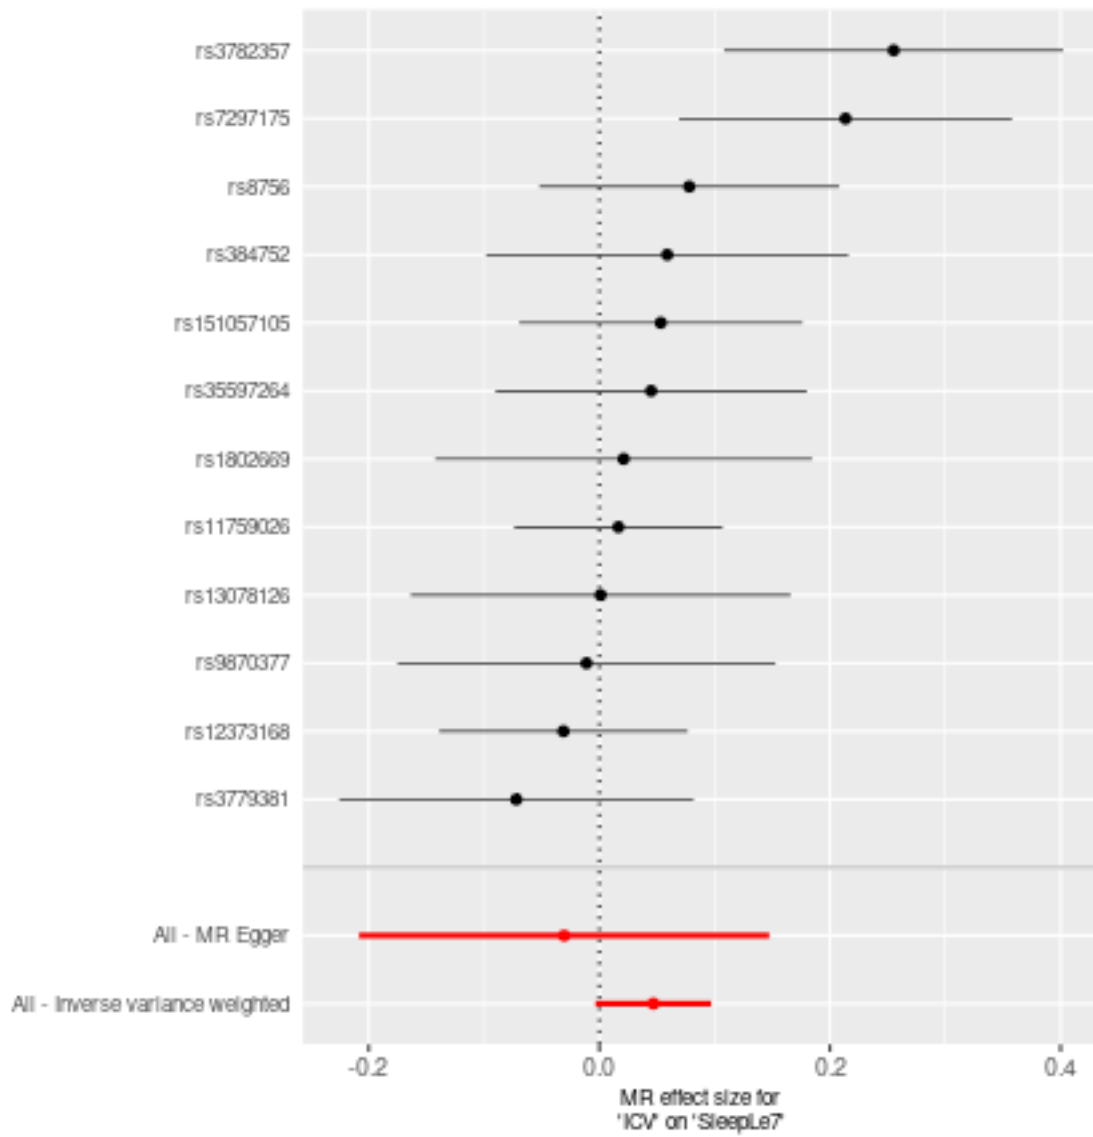



### Comparison of results using different MR methods

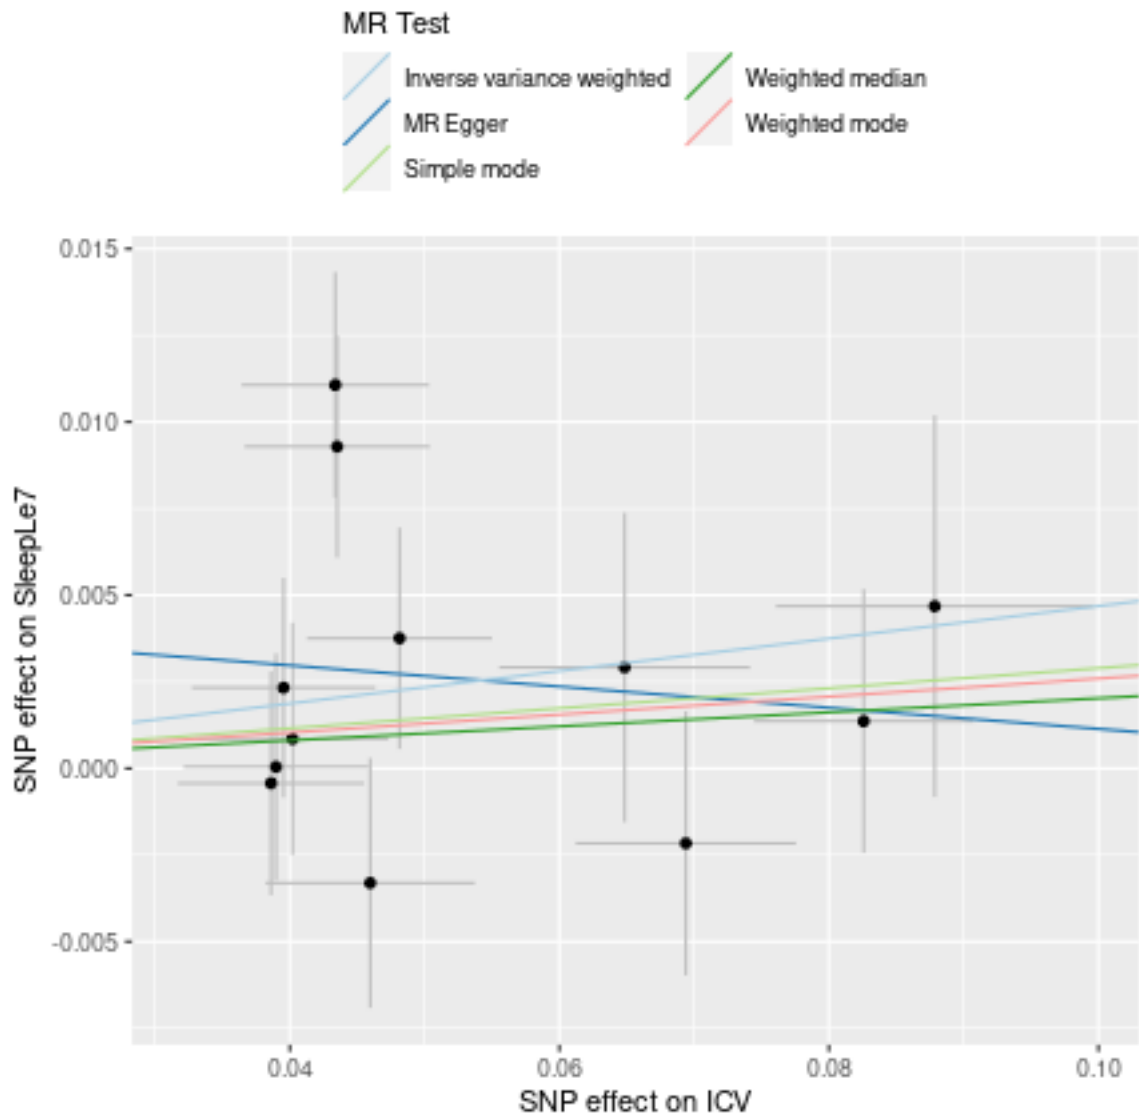

# Funnel plot

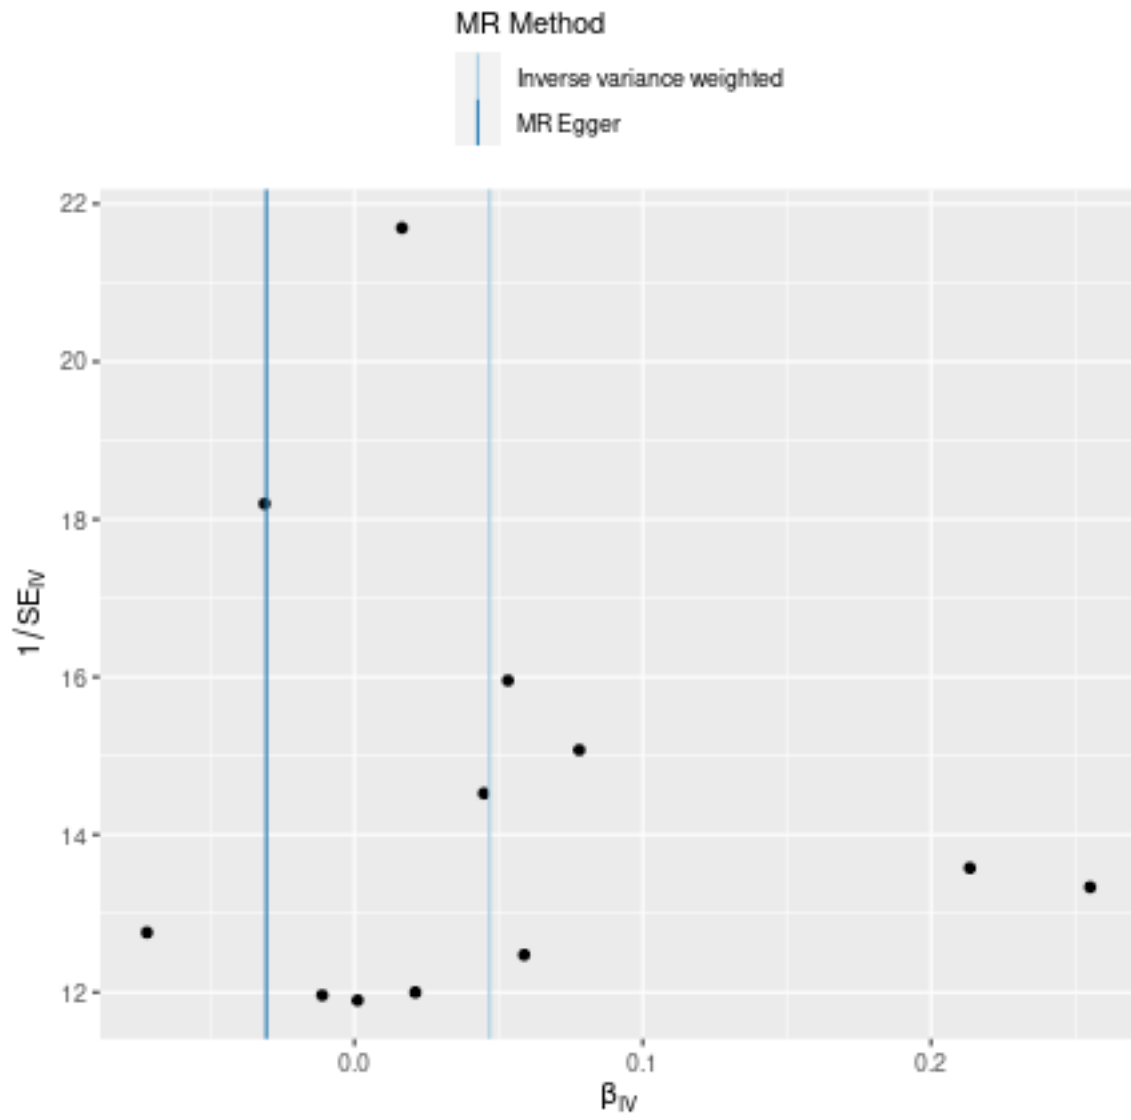

## Leave-one-out sensitivity analysis

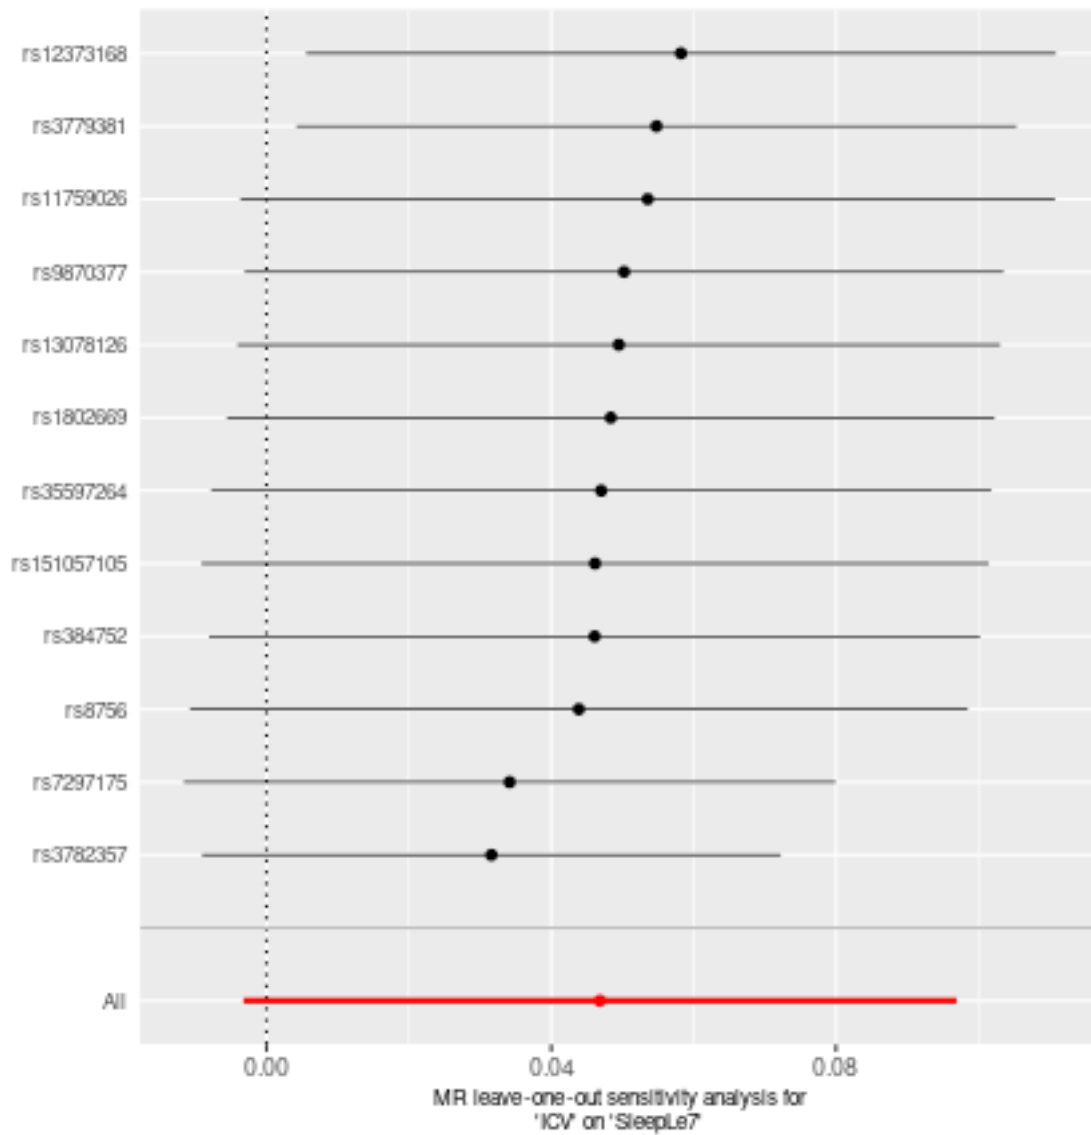

**STROBE-MR checklist of recommended items to address in reports of Mendelian randomization studies<sup>1 2</sup>**

| Item No.            | Section                   | Checklist item                                                                                                                                                                                                                            | Page No. | Relevant text from manuscript                                                                                                                                                                                                                                                                                                                                                                                                                                                                                                                                                                                                                                                                                                                                                                                                                                                                                                                                                                                                                                                                                                                                                                                                                                                                                                                                                                                                                                                   |
|---------------------|---------------------------|-------------------------------------------------------------------------------------------------------------------------------------------------------------------------------------------------------------------------------------------|----------|---------------------------------------------------------------------------------------------------------------------------------------------------------------------------------------------------------------------------------------------------------------------------------------------------------------------------------------------------------------------------------------------------------------------------------------------------------------------------------------------------------------------------------------------------------------------------------------------------------------------------------------------------------------------------------------------------------------------------------------------------------------------------------------------------------------------------------------------------------------------------------------------------------------------------------------------------------------------------------------------------------------------------------------------------------------------------------------------------------------------------------------------------------------------------------------------------------------------------------------------------------------------------------------------------------------------------------------------------------------------------------------------------------------------------------------------------------------------------------|
| 1                   | <b>TITLE and ABSTRACT</b> | Indicate Mendelian randomization (MR) as the study's design in the title and/or the abstract if that is a main purpose of the study                                                                                                       | 3        | Mendelian randomization did not yield evidence for causal impacts of sleep on brain structure.                                                                                                                                                                                                                                                                                                                                                                                                                                                                                                                                                                                                                                                                                                                                                                                                                                                                                                                                                                                                                                                                                                                                                                                                                                                                                                                                                                                  |
| <b>INTRODUCTION</b> |                           |                                                                                                                                                                                                                                           |          |                                                                                                                                                                                                                                                                                                                                                                                                                                                                                                                                                                                                                                                                                                                                                                                                                                                                                                                                                                                                                                                                                                                                                                                                                                                                                                                                                                                                                                                                                 |
| 2                   | <b>Background</b>         | Explain the scientific background and rationale for the reported study. What is the exposure? Is a potential causal relationship between exposure and outcome plausible? Justify why MR is a helpful method to address the study question | 5        | Cross-sectional relationships can be further investigated using genetic information to assess possible causality. Twin and genome wide association studies (GWAS) have demonstrated heritability and polygenic influences on sleep duration, although GWAS heritability is modest 50-56. Single nucleotide polymorphism heritability (SNP-h <sup>2</sup> ) for sleep duration is typically below 10% <sup>57</sup> . To date, up to 78 independent genetic loci have been associated with sleep duration <sup>50</sup> , among which the thyroid-specific transcription factor gene (PAX8) and the Vaccinia related kinase 2 (VRK2) gene have been considered as the most robust findings. Besides gene discovery, genetic overlap between sleep duration and other conditions have been studied <sup>50,52,58</sup> , suggesting pleiotropy between sleep duration, somatic disorders, and neuropsychiatric health. However, no studies have investigated whether genes affect sleep duration uniformly for below vs. above average sleepers. Sleep duration tends to be positively related to health in below-average sleepers and negatively related to health in above average sleepers. If the same is true for brain characteristics, it is interesting to investigate genetic differences between these participants and to use Mendelian randomization analyses to examine the possible causal relationships between sleep duration and brain health as indexed by MRI. |
| 3                   | <b>Objectives</b>         | State specific objectives clearly, including pre-specified causal hypotheses (if any). State that MR is a method that, under specific assumptions, intends to estimate causal effects                                                     | 6        | Genetic analyses were undertaken to further investigate the sleep – brain relationships, and to make tentative inferences about causality. We took advantage of measured variation in genes for each trait of interest and used Mendelian                                                                                                                                                                                                                                                                                                                                                                                                                                                                                                                                                                                                                                                                                                                                                                                                                                                                                                                                                                                                                                                                                                                                                                                                                                       |

randomization<sup>60</sup> to test the direction of causality between sleep duration and brain structure.

| METHODS |                                      |                                                                                                                                                                                                                                 |        |                                                                                                                                                                                                                                                                                                                                                                                                                                                                                                                                                                                                                                                                                                                                                                                                                                                                                                                                                                                                                                                                                                  |
|---------|--------------------------------------|---------------------------------------------------------------------------------------------------------------------------------------------------------------------------------------------------------------------------------|--------|--------------------------------------------------------------------------------------------------------------------------------------------------------------------------------------------------------------------------------------------------------------------------------------------------------------------------------------------------------------------------------------------------------------------------------------------------------------------------------------------------------------------------------------------------------------------------------------------------------------------------------------------------------------------------------------------------------------------------------------------------------------------------------------------------------------------------------------------------------------------------------------------------------------------------------------------------------------------------------------------------------------------------------------------------------------------------------------------------|
| 4       | <b>Study design and data sources</b> | Present key elements of the study design early in the article. Consider including a table listing sources of data for all phases of the study. For each data source contributing to the analysis, describe the following:       | 5,6,13 | To determine the plausible direction of causality between brain structure and sleep duration, we performed a series of genetic analyses using cross-sectional data from UK Biobank. Hippocampus, total gray matter volume and ICV were chosen as regions of interest as they showed the typical inverted U-shaped relationship to sleep duration. For details about selection of participant, quality control procedures and genetic analyses, see SI Genetic analyses, SI Genetics notes and SI Genetics tables.                                                                                                                                                                                                                                                                                                                                                                                                                                                                                                                                                                                |
|         | a)                                   | Setting: Describe the study design and the underlying population, if possible. Describe the setting, locations, and relevant dates, including periods of recruitment, exposure, follow-up, and data collection, when available. | 13     | SI Genetic analyses                                                                                                                                                                                                                                                                                                                                                                                                                                                                                                                                                                                                                                                                                                                                                                                                                                                                                                                                                                                                                                                                              |
|         | b)                                   | Participants: Give the eligibility criteria, and the sources and methods of selection of participants. Report the sample size, and whether any power or sample size calculations were carried out prior to the main analysis    | 25     | SI Sample characteristics                                                                                                                                                                                                                                                                                                                                                                                                                                                                                                                                                                                                                                                                                                                                                                                                                                                                                                                                                                                                                                                                        |
|         | c)                                   | Describe measurement, quality control and selection of genetic variants                                                                                                                                                         | 29,30  | The TwoSampleMR R package <sup>118</sup> was used to investigate the existence of causal relations between sleep duration and the brain variables. Independent instrumental SNPs were selected using the following parameters: association p value $\leq 10^{-6}$ , MAF $\geq 0.05$ , LD- $r^2 \leq 0.1$ , and LD-distance=10kb. The LD structure was derived from 10,000 independent European participants randomly selected from UKBB. The powerful inverse variance weighted (IVW) model from TwoSampleMR was used as the main model. Other models implemented in the software were also run as sensitivity analysis. To further support the results, the analysis was reformed with p value $\leq 10^{-5}$ , which would increase the strength of instrumenting for the less powerful sleep duration traits. For the only significant causal relation, i.e., ICV to sleep duration for shorter than average sleepers, a third analysis with $p \leq 5 \times 10^{-8}$ used for selecting instrumental SNP was performed. The standard output from TwoSampleMR is shown in SI Genetics notes. |

|   |                                           |                                                                                                                                                                                         |          |                                                                                                                                                                                                                                                                                                                                                                                                                                                                                                                                                                                                                                                                                                                                                                                                                                                                                                                                                                                                                                                                                                     |
|---|-------------------------------------------|-----------------------------------------------------------------------------------------------------------------------------------------------------------------------------------------|----------|-----------------------------------------------------------------------------------------------------------------------------------------------------------------------------------------------------------------------------------------------------------------------------------------------------------------------------------------------------------------------------------------------------------------------------------------------------------------------------------------------------------------------------------------------------------------------------------------------------------------------------------------------------------------------------------------------------------------------------------------------------------------------------------------------------------------------------------------------------------------------------------------------------------------------------------------------------------------------------------------------------------------------------------------------------------------------------------------------------|
|   | d)                                        | For each exposure, outcome, and other relevant variables, describe methods of assessment and diagnostic criteria for diseases                                                           | 26,29,30 | See above, and “For UKB, sleep was measured through multiple questions. ... For UKB, we calculated a sum score of different sleep-related measures (sleeplessness [field 1200], problems getting up in the morning [field 1170], daytime dozing [field 1220], snoring [field 1210] and chronotype [field 1180]).”                                                                                                                                                                                                                                                                                                                                                                                                                                                                                                                                                                                                                                                                                                                                                                                   |
|   | e)                                        | Provide details of ethics committee approval and participant informed consent, if relevant                                                                                              | 25       | For UKB, ethics approval was obtained from the National Health Service National Research Ethics Service (Ref 11/NW/0382)                                                                                                                                                                                                                                                                                                                                                                                                                                                                                                                                                                                                                                                                                                                                                                                                                                                                                                                                                                            |
| 5 | <b>Assumptions</b>                        | Explicitly state the three core IV assumptions for the main analysis (relevance, independence and exclusion restriction) as well assumptions for any additional or sensitivity analysis |          |                                                                                                                                                                                                                                                                                                                                                                                                                                                                                                                                                                                                                                                                                                                                                                                                                                                                                                                                                                                                                                                                                                     |
| 6 | <b>Statistical methods: main analysis</b> | Describe statistical methods and statistics used                                                                                                                                        | 28-30    | The TwoSampleMR R package <sup>128</sup> was used to investigate the existence of causal relations between sleep duration and the brain variables. Independent instrumental SNPs were selected using the following parameters: association p value $\leq 10^{-6}$ , MAF $\geq 0.05$ , LD- $r^2 \leq 0.1$ , and LD-distance=10kb. The LD structure was derived from 10,000 independent European participants randomly selected from UKBB. The powerful inverse variance weighted (IVW) model from TwoSampleMR was used as the main model. Other models implemented in the software were also run as sensitivity analysis. To further support the results, the analysis was reperformed with p value $\leq 10^{-5}$ , which would increase the strength of instrumenting for the less powerful sleep duration traits. For the only significant causal relation, i.e., ICV to sleep duration for shorter than average sleepers, a third analysis with p $\leq 5 \times 10^{-8}$ used for selecting instrumental SNP was performed. The standard output from TwoSampleMR is shown in SI Genetics notes. |
|   | a)                                        | Describe how quantitative variables were handled in the analyses (i.e., scale, units, model)                                                                                            |          |                                                                                                                                                                                                                                                                                                                                                                                                                                                                                                                                                                                                                                                                                                                                                                                                                                                                                                                                                                                                                                                                                                     |
|   | b)                                        | Describe how genetic variants were handled in the analyses and, if applicable, how their weights were selected                                                                          |          |                                                                                                                                                                                                                                                                                                                                                                                                                                                                                                                                                                                                                                                                                                                                                                                                                                                                                                                                                                                                                                                                                                     |

|   |                                                     |                                                                                                                                                                                                                                         |    |                                          |
|---|-----------------------------------------------------|-----------------------------------------------------------------------------------------------------------------------------------------------------------------------------------------------------------------------------------------|----|------------------------------------------|
|   |                                                     | c) Describe the MR estimator (e.g. two-stage least squares, Wald ratio) and related statistics. Detail the included covariates and, in case of two-sample MR, whether the same covariate set was used for adjustment in the two samples |    |                                          |
|   |                                                     | d) Explain how missing data were addressed                                                                                                                                                                                              |    |                                          |
|   |                                                     | e) If applicable, indicate how multiple testing was addressed                                                                                                                                                                           |    |                                          |
| 7 | <b>Assessment of assumptions</b>                    | Describe any methods or prior knowledge used to assess the assumptions or justify their validity                                                                                                                                        |    |                                          |
| 8 | <b>Sensitivity analyses and additional analyses</b> | Describe any sensitivity analyses or additional analyses performed (e.g. comparison of effect estimates from different approaches, independent replication, bias analytic techniques, validation of instruments, simulations)           |    |                                          |
| 9 | <b>Software and pre-registration</b>                |                                                                                                                                                                                                                                         |    |                                          |
|   | a)                                                  | Name statistical software and package(s), including version and settings used                                                                                                                                                           | 29 | The TwoSampleMR R package <sup>128</sup> |
|   | b)                                                  | State whether the study protocol and details were pre-registered (as well as when and where)                                                                                                                                            |    | No                                       |

## RESULTS

|    |                         |                                                                                                                                                                                                                                                                                                                          |       |                                                                                            |
|----|-------------------------|--------------------------------------------------------------------------------------------------------------------------------------------------------------------------------------------------------------------------------------------------------------------------------------------------------------------------|-------|--------------------------------------------------------------------------------------------|
| 10 | <b>Descriptive data</b> |                                                                                                                                                                                                                                                                                                                          |       |                                                                                            |
|    | a)                      | Report the numbers of individuals at each stage of included studies and reasons for exclusion. Consider use of a flow diagram                                                                                                                                                                                            |       | Supplemental Information                                                                   |
|    | b)                      | Report summary statistics for phenotypic exposure(s), outcome(s), and other relevant variables (e.g. means, SDs, proportions)                                                                                                                                                                                            |       | Supplemental Information                                                                   |
|    | c)                      | If the data sources include meta-analyses of previous studies, provide the assessments of heterogeneity across these studies                                                                                                                                                                                             |       | NaN                                                                                        |
|    | d)                      | For two-sample MR: <ul style="list-style-type: none"> <li>i. Provide justification of the similarity of the genetic variant-exposure associations between the exposure and outcome samples</li> <li>ii. Provide information on the number of individuals who overlap between the exposure and outcome studies</li> </ul> |       | Supplemental Information                                                                   |
| 11 | <b>Main results</b>     |                                                                                                                                                                                                                                                                                                                          |       |                                                                                            |
|    | a)                      | Report the associations between genetic variant and exposure, and between genetic variant and outcome, preferably on an interpretable scale                                                                                                                                                                              | 15,16 | Among the 12 pairs, ICV showed a significant causal effect (34 instrumental SNP, minimal F |

|    |                                                     |                                                                                                                                                                                                              |                                                                                                                                                                                                                                                                                                                                                                                                                                                                                                                                                                                                                                                                                                                                                                                                                  |
|----|-----------------------------------------------------|--------------------------------------------------------------------------------------------------------------------------------------------------------------------------------------------------------------|------------------------------------------------------------------------------------------------------------------------------------------------------------------------------------------------------------------------------------------------------------------------------------------------------------------------------------------------------------------------------------------------------------------------------------------------------------------------------------------------------------------------------------------------------------------------------------------------------------------------------------------------------------------------------------------------------------------------------------------------------------------------------------------------------------------|
|    |                                                     |                                                                                                                                                                                                              | stats > 24; inverse-variance weighted beta = 0.060, se = 0.017, p = 5.36x10 <sup>-4</sup> ) on sleep duration for the shorter than average sleepers (Figure 6a and SI Instrumental variables), with no causal effects of sleep on ICV.                                                                                                                                                                                                                                                                                                                                                                                                                                                                                                                                                                           |
|    | b)                                                  | Report MR estimates of the relationship between exposure and outcome, and the measures of uncertainty from the MR analysis, on an interpretable scale, such as odds ratio or relative risk per SD difference | Supplemental Information                                                                                                                                                                                                                                                                                                                                                                                                                                                                                                                                                                                                                                                                                                                                                                                         |
|    | c)                                                  | If relevant, consider translating estimates of relative risk into absolute risk for a meaningful time period                                                                                                 |                                                                                                                                                                                                                                                                                                                                                                                                                                                                                                                                                                                                                                                                                                                                                                                                                  |
|    | d)                                                  | Consider plots to visualize results (e.g. forest plot, scatterplot of associations between genetic variants and outcome versus between genetic variants and exposure)                                        | 15,16<br>Figure 5. Genetic relations between sleep duration and brain structure. a. Distribution of PGS-ICV in different sleep duration strata among shorter than average sleepers (< 7 hours). b. ICV for shorter than average sleepers with one standard deviation above (blue) and below (red) average PGS for sleep duration c. Distribution of PGS for total gray matter volume in different sleep duration strata among shorter than average sleepers. d. Total gray matter volume for shorter than average sleepers with one standard deviation above (blue) and below (red) average PGS for sleep duration.<br>Figure 6 SNP effects on MRI-derived measures in standard deviations. SNP effects on intracranial volume (ICV) (x-axis) and sleep duration (y-axis) for the shorter than average sleepers. |
| 12 | <b>Assessment of assumptions</b>                    |                                                                                                                                                                                                              |                                                                                                                                                                                                                                                                                                                                                                                                                                                                                                                                                                                                                                                                                                                                                                                                                  |
|    | a)                                                  | Report the assessment of the validity of the assumptions                                                                                                                                                     | Supplemental Information for details                                                                                                                                                                                                                                                                                                                                                                                                                                                                                                                                                                                                                                                                                                                                                                             |
|    | b)                                                  | Report any additional statistics (e.g., assessments of heterogeneity across genetic variants, such as $I^2$ , Q statistic or E-value)                                                                        | Supplemental Information for details                                                                                                                                                                                                                                                                                                                                                                                                                                                                                                                                                                                                                                                                                                                                                                             |
| 13 | <b>Sensitivity analyses and additional analyses</b> |                                                                                                                                                                                                              |                                                                                                                                                                                                                                                                                                                                                                                                                                                                                                                                                                                                                                                                                                                                                                                                                  |
|    | a)                                                  | Report any sensitivity analyses to assess the robustness of the main results to violations of the assumptions                                                                                                | Supplemental Information for details                                                                                                                                                                                                                                                                                                                                                                                                                                                                                                                                                                                                                                                                                                                                                                             |
|    | b)                                                  | Report results from other sensitivity analyses or additional analyses                                                                                                                                        | Supplemental Information for details                                                                                                                                                                                                                                                                                                                                                                                                                                                                                                                                                                                                                                                                                                                                                                             |



|    |                                                                                    |       |                                                                                                                                                                                                              |
|----|------------------------------------------------------------------------------------|-------|--------------------------------------------------------------------------------------------------------------------------------------------------------------------------------------------------------------|
| c) | Report any assessment of direction of causal relationship (e.g., bidirectional MR) | 15.16 | We performed bidirectional Mendelian randomization analysis for each brain volumetric trait to sleep duration (see SI STROBE-MR-checklist for details, reporting according to best practice for MR studies). |
| d) | When relevant, report and compare with estimates from non-MR analyses              |       | NaN                                                                                                                                                                                                          |
| e) | Consider additional plots to visualize results (e.g., leave-one-out analyses)      |       | Supplemental Information for details                                                                                                                                                                         |

## DISCUSSION

|    |                    |                                                          |          |                                                                                                                                                                                                                                                                                                                                                                                                                                                                                                                                                                                                                                                                                                                                                                                                                                                                                                                                                                                                                                                                                                                                                                                                                                                                                                                                                                                                                                                                                                                                                                                                                                                                                      |
|----|--------------------|----------------------------------------------------------|----------|--------------------------------------------------------------------------------------------------------------------------------------------------------------------------------------------------------------------------------------------------------------------------------------------------------------------------------------------------------------------------------------------------------------------------------------------------------------------------------------------------------------------------------------------------------------------------------------------------------------------------------------------------------------------------------------------------------------------------------------------------------------------------------------------------------------------------------------------------------------------------------------------------------------------------------------------------------------------------------------------------------------------------------------------------------------------------------------------------------------------------------------------------------------------------------------------------------------------------------------------------------------------------------------------------------------------------------------------------------------------------------------------------------------------------------------------------------------------------------------------------------------------------------------------------------------------------------------------------------------------------------------------------------------------------------------|
| 14 | <b>Key results</b> | Summarize key results with reference to study objectives | 17,19-20 | <p>Aligning with the longitudinal results, the Mendelian randomization analyses did not reveal evidence for a causal impact of short sleep on brain structure. Taken together, the longitudinal, cross-sectional and genetic results suggest that short habitual sleep duration is not related to poorer brain health in healthy adults as indexed by structural brain measures, and that somewhat less than 7 hours of sleep is associated with the most favourable features, in line with converging evidence from research on mortality, health and cognition.</p> <p>Finally, the Mendelian randomization analyses showed causal effects of ICV on sleep duration but no causal effects of sleep duration on any MRI-derived brain measure. Hence, in the current samples, people with larger heads on average report to sleep longer, and this relationship partly depends on genetics. The lack of an inverse influence of sleep duration on ICV was given, as ICV does not change in adults and hence cannot be affected by sleep. Still, the genetic results suggested that there may be a mechanistic relationship between ICV and sleep duration which could warrant further explorations. This effect was removed from the estimated sleep duration – brain volume relationships by covarying for ICV, which may contribute to explain that the nominally significant relationship between total gray matter volume and sleep duration in the Mendelian randomization analysis did not survive corrections. In sum, the genetic results were in coherence with a view of average and “optimal” sleep duration as relatively well aligned and did not provide evidence</p> |
|----|--------------------|----------------------------------------------------------|----------|--------------------------------------------------------------------------------------------------------------------------------------------------------------------------------------------------------------------------------------------------------------------------------------------------------------------------------------------------------------------------------------------------------------------------------------------------------------------------------------------------------------------------------------------------------------------------------------------------------------------------------------------------------------------------------------------------------------------------------------------------------------------------------------------------------------------------------------------------------------------------------------------------------------------------------------------------------------------------------------------------------------------------------------------------------------------------------------------------------------------------------------------------------------------------------------------------------------------------------------------------------------------------------------------------------------------------------------------------------------------------------------------------------------------------------------------------------------------------------------------------------------------------------------------------------------------------------------------------------------------------------------------------------------------------------------|

|                          |                         |                                                                                                                                                                                                                                                                                                                                                         |       |                                                                                                                                                                                                                                                                                                                                                                                                                                                                  |
|--------------------------|-------------------------|---------------------------------------------------------------------------------------------------------------------------------------------------------------------------------------------------------------------------------------------------------------------------------------------------------------------------------------------------------|-------|------------------------------------------------------------------------------------------------------------------------------------------------------------------------------------------------------------------------------------------------------------------------------------------------------------------------------------------------------------------------------------------------------------------------------------------------------------------|
|                          |                         |                                                                                                                                                                                                                                                                                                                                                         |       | for a causal relationship of sleep duration on brain structural features.                                                                                                                                                                                                                                                                                                                                                                                        |
| 15                       | <b>Limitations</b>      | Discuss limitations of the study, taking into account the validity of the IV assumptions, other sources of potential bias, and imprecision. Discuss both direction and magnitude of any potential bias and any efforts to address them                                                                                                                  | 21-22 | Fifth, in order to study differential genetic influences on sleep duration in participants with different habitual sleep patterns, we stratified the sample by 7 hours, a strategy which made our GWAS underpowered. While the findings are promising, large-scale independent validation is needed. Furthermore, given the limited power of the GWAS, the causal relations suggested by the Mendelian randomization analysis will also need future replication. |
| 16                       | <b>Interpretation</b>   |                                                                                                                                                                                                                                                                                                                                                         |       |                                                                                                                                                                                                                                                                                                                                                                                                                                                                  |
|                          |                         | a) Meaning: Give a cautious overall interpretation of results in the context of their limitations and in comparison with other studies                                                                                                                                                                                                                  | 19-20 |                                                                                                                                                                                                                                                                                                                                                                                                                                                                  |
|                          |                         | b) Mechanism: Discuss underlying biological mechanisms that could drive a potential causal relationship between the investigated exposure and the outcome, and whether the gene-environment equivalence assumption is reasonable. Use causal language carefully, clarifying that IV estimates may provide causal effects only under certain assumptions | 19-20 |                                                                                                                                                                                                                                                                                                                                                                                                                                                                  |
|                          |                         | c) Clinical relevance: Discuss whether the results have clinical or public policy relevance, and to what extent they inform effect sizes of possible interventions                                                                                                                                                                                      |       | NaN                                                                                                                                                                                                                                                                                                                                                                                                                                                              |
| 17                       | <b>Generalizability</b> | Discuss the generalizability of the study results (a) to other populations, (b) across other exposure periods/timings, and (c) across other levels of exposure                                                                                                                                                                                          | 22    | Finally, although some of the samples are population based, no MRI study is fully representative of the population from which it is sampled. Despite including studies from multiple European countries and the US, we can not exclude the possibility that other sleep-brain patterns exist in other populations from Europe or elsewhere.                                                                                                                      |
| <b>OTHER INFORMATION</b> |                         |                                                                                                                                                                                                                                                                                                                                                         |       |                                                                                                                                                                                                                                                                                                                                                                                                                                                                  |
| 18                       | <b>Funding</b>          | Describe sources of funding and the role of funders in the present study and, if applicable, sources of funding for the databases and original study or studies on which the present study is based                                                                                                                                                     | 22-23 | The Lifebrain consortium is funded by the EU Horizon 2020 Grant agreement number 732592 (Lifebrain). The different sub-studies are supported by different sources: LCBC: The European Research Council under grant agreements 283634, 725025 (to A.M.F.) and 313440 (to K.B.W.), as well as the Norwegian Research Council (to A.M.F., K.B.W.), The National                                                                                                     |

Association for Public Health's dementia research program, Norway (to A.M.F). Betula: a scholar grant from the Knut and Alice Wallenberg (KAW) foundation to L.N. Barcelona: Partially supported by a Spanish Ministry of Economy and Competitiveness (MINECO) grant to D-BF [grant number PSI2015-64227-R (AEI/FEDER, UE)]; by the Walnuts and Healthy Aging study (<http://www.clinicaltrials.gov>; Grant NCT01634841) funded by the California Walnut Commission, Sacramento, California; and an ICREA Academia 2019 award. BASE-II has been supported by the German Federal Ministry of Education and Research under grant numbers 16SV5537/16SV5837/ 16SV5538/ 16SV5536K/ 01UW0808/ 01UW0706/ 01GL1716A/ 01GL1716B, the European Research Council under grant agreement 677804 (to S.K.). Work on the Whitehall II Imaging Substudy was mainly funded by Lifelong Health and Well-being Programme Grant G1001354 from the UK Medical Research Council ("Predicting MRI Abnormalities with Longitudinal Data of the Whitehall II Substudy") to K.E. The Wellcome Centre for Integrative Neuroimaging is supported by core funding from award 203139/Z/16/Z from the Wellcome Trust. Data were provided [in part] by the Human Connectome Project, WU-Minn Consortium (Principal Investigators: David Van Essen and Kamil Ugurbil; 1U54MH091657) funded by the 16 NIH Institutes and Centers that support the NIH Blueprint for Neuroscience Research; and by the McDonnell Center for Systems Neuroscience at Washington University. Part of the research was conducted using the UK Biobank resource under application number 32048.

19 **Data and data sharing**

Provide the data used to perform all analyses or report where and how the data can be accessed, and reference these sources in the article. Provide the statistical code needed to reproduce the results in the article, or report whether the code is publicly accessible and if so, where

30

Data supporting the results of the current study are available from the PI of each sub-study on request, given appropriate ethics and data protection approvals. Contact information can be obtained from the corresponding authors. UK Biobank data requests can be submitted to <http://www.ukbiobank.ac.uk>. Most of the r-code for the statistical analyses are provided in SI.

|    |                              |                                                                |    |                                                                                                                                                                                                                                                                                                                                                                        |
|----|------------------------------|----------------------------------------------------------------|----|------------------------------------------------------------------------------------------------------------------------------------------------------------------------------------------------------------------------------------------------------------------------------------------------------------------------------------------------------------------------|
| 20 | <b>Conflicts of Interest</b> | All authors should declare all potential conflicts of interest | 30 | Claire E Sexton reports consulting fees from Jazz Pharmaceuticals and is now a full-time employee of the U.S. Alzheimer's Association. Christian A Drevon is a cofounder, stock-owner, board member and consultant in the contract laboratory Vitas AS, performing personalized analyses of blood biomarkers. The rest of the authors report no conflicts of interest. |
|----|------------------------------|----------------------------------------------------------------|----|------------------------------------------------------------------------------------------------------------------------------------------------------------------------------------------------------------------------------------------------------------------------------------------------------------------------------------------------------------------------|

This checklist is copyrighted by the Equator Network under the Creative Commons Attribution 3.0 Unported (CC BY 3.0) license.

1. Skrivankova VW, Richmond RC, Woolf BAR, Yarmolinsky J, Davies NM, Swanson SA, et al. Strengthening the Reporting of Observational Studies in Epidemiology using Mendelian Randomization (STROBE-MR) Statement. JAMA. 2021;under review.
2. Skrivankova VW, Richmond RC, Woolf BAR, Davies NM, Swanson SA, VanderWeele TJ, et al. Strengthening the Reporting of Observational Studies in Epidemiology using Mendelian Randomisation (STROBE-MR): Explanation and Elaboration. BMJ. 2021;375:n2233.
